# Supplementary material for: Whether Gametophytes Are Reduced or Unreduced in Angiosperms Might Be Determined Metabolically
Source: MDPI journal article supplement (doi:10.3390/genes11121449), 2020-12-02
Supplement: s1 [file s1]

**Table S2.** Rules used to assign gene ontology (GO) terms to groups and subgroups. Underlined terms in the excluded column indicate where the corresponding terms were assigned.

| Group and subgroup               | Included                                                                                                                                                                                                                                                                                                                                                          | Excluded                                                                                                                                                                                                                                                                                                                                                                                                                                                                                                                                    |
|----------------------------------|-------------------------------------------------------------------------------------------------------------------------------------------------------------------------------------------------------------------------------------------------------------------------------------------------------------------------------------------------------------------|---------------------------------------------------------------------------------------------------------------------------------------------------------------------------------------------------------------------------------------------------------------------------------------------------------------------------------------------------------------------------------------------------------------------------------------------------------------------------------------------------------------------------------------------|
| Metabolism: bioenergetics        | glycolysis; TCA cycle; mitochondrial ETC; ATP synthase; mitochondrial components; glyoxysomes; fatty acid and carbohydrate synthesis, catabolism, modification and regulation processes; regulation of mitochondrial development and function; mitochondrial pyruvate transport; NAD(H) processes; starch and trehalose processes; TOR processes; ATPase activity | mitochondrial <u>signaling</u> ; <u>stress</u> homeostasis; mitochondrial <u>transcription</u> or <u>translation</u> processes; mitochondrial targeting or localization ( <u>transporters</u> ); <u>photosynthetic</u> ferredoxin NADP processes; <u>stress</u> attenuating monodehydroascorbate reductase (NADH) processes; <u>transcription</u> regulating histone deacetylase associated NAD processes; ATPase-coupled <u>transporter</u> activities; fatty acid and sugar <u>signaling</u> , homeostasis and <u>transport</u> processes |
| Metabolism: catabolism           | terms that include catabolic processes in their descriptions; autophagic processes; peroxisome and proteasome processes; ubiquitin processes; abscission and senescence processes                                                                                                                                                                                 | catabolic processes that participate actively in <u>bioenergetics</u> pathways; ubiquitin processes associated with <u>cell division</u> or <u>transcription</u>                                                                                                                                                                                                                                                                                                                                                                            |
| Metabolism: metabolism           | Metabolic processes except as noted below                                                                                                                                                                                                                                                                                                                         | metabolic processes associated with central metabolism ( <u>bioenergetics</u> ), cell cycle processes ( <u>cell division</u> ), <u>photosynthesis</u> , <u>catabolism</u> , <u>transporter</u> functions, <u>protein modification</u> , <u>transcription</u> , <u>translation</u> , <u>signaling</u> and <u>stress</u>                                                                                                                                                                                                                      |
| Metabolism: photosynthesis       | photosynthesis related organelles and metabolic processes                                                                                                                                                                                                                                                                                                         |                                                                                                                                                                                                                                                                                                                                                                                                                                                                                                                                             |
| Metabolism: transporters         | cytoplasmic and transmembrane molecule transport                                                                                                                                                                                                                                                                                                                  | transferase based molecular modifications                                                                                                                                                                                                                                                                                                                                                                                                                                                                                                   |
| Regulation: protein modification | post translational modifications and processes                                                                                                                                                                                                                                                                                                                    | protein modifications associated with <u>signaling</u> and <u>stress</u>                                                                                                                                                                                                                                                                                                                                                                                                                                                                    |
| Regulation: regulation           | regulation of developmental and metabolic activities                                                                                                                                                                                                                                                                                                              | regulation of <u>bioenergetics</u> , <u>catabolism</u> , <u>cell division</u> , <u>photosynthesis</u> , <u>signaling</u> , <u>stress</u> and <u>transporter</u> processes; post translational modifications and processes ( <u>protein modification</u> )                                                                                                                                                                                                                                                                                   |
| Regulation: transcription        | regulation of processes associated with transcription and gene silencing                                                                                                                                                                                                                                                                                          |                                                                                                                                                                                                                                                                                                                                                                                                                                                                                                                                             |
| Regulation: translation          | regulation of translation, post-transcriptional silencing, mRNA splicing and processing, and ribosome biosynthesis and function                                                                                                                                                                                                                                   | post-translational modifications ( <u>protein modification</u> )                                                                                                                                                                                                                                                                                                                                                                                                                                                                            |

|                                   |                                                                                                                                                                                                                                                                                                 |                                                                                                                         |
|-----------------------------------|-------------------------------------------------------------------------------------------------------------------------------------------------------------------------------------------------------------------------------------------------------------------------------------------------|-------------------------------------------------------------------------------------------------------------------------|
| Signaling and response: signaling | detection, regulation and responses to non-stress biotic and abiotic environmental factors                                                                                                                                                                                                      | abscisic acid signaling, responses to <u>stress</u> conditions and molecules                                            |
| Signaling and response: stress    | detection, regulation and responses to abscisic acid, calcium, ethylene and jasmonic acid; callose synthesis; biosynthesis of antioxidants and related processes; homeostasis processes; catalase; detoxification processes; heat acclimation processes; responses to stress; defense responses | detection, regulation and responses to non-stress biotic and abiotic <u>signaling</u>                                   |
| Development: cell division        | meiotic and mitotic processes and regulation; interphase processes; chromosome repair mechanisms; gametophyte formation; reproductive processes and regulation                                                                                                                                  |                                                                                                                         |
| Development: development          | chromosomal, organellar, cellular, tissue and organ structures and developmental processes                                                                                                                                                                                                      | mitochondrial ( <u>bioenergetics</u> ) and chloroplast ( <u>photosynthesis</u> ) structures and developmental processes |

---
