# Supplementary material for: Whether Gametophytes Are Reduced or Unreduced in Angiosperms Might Be Determined Metabolically
Source: MDPI journal article supplement (doi:10.3390/genes11121449), 2020-12-02
Supplement: s1 [file s1]

**Table S7.** Overrepresented (+) and underrepresented (-) gene ontology (GO) terms by comparison using DEGs that were up-regulated in each treatment.

| Order | Line no. | Comparison    | DEGs used |   | GO term                                        | GO no.     | Group                  | Subgroup       | Cat. | Ref. list | Obs. | Exp.  | Fold  | Raw P value | FDR      |
|-------|----------|---------------|-----------|---|------------------------------------------------|------------|------------------------|----------------|------|-----------|------|-------|-------|-------------|----------|
| 1     | 1        | L1-3 vs. M1-3 | L1-3 up   | + | cytoplasm                                      | GO:0005737 | Development            | Development    | C    | 14837     | 118  | 77.93 | 1.51  | 3.19E-12    | 3.32E-09 |
| 1     | 2        | L1-3 vs. M1-3 | L1-3 up   | + | cytosol                                        | GO:0005829 | Development            | Development    | C    | 3241      | 40   | 17.02 | 2.35  | 1.95E-07    | 1.01E-04 |
| 1     | 3        | L1-3 vs. M1-3 | M1-3 up   | + | inner mitochondrial membrane protein complex   | GO:0098800 | Metabolism             | Bioenergetics  | C    | 177       | 6    | 0.9   | 6.64  | 3.55E-04    | 5.28E-02 |
| 1     | 4        | L1-3 vs. M1-3 | M1-3 up   | + | mitochondrial envelope                         | GO:0005740 | Metabolism             | Bioenergetics  | C    | 317       | 8    | 1.62  | 4.94  | 2.67E-04    | 4.63E-02 |
| 1     | 5        | L1-3 vs. M1-3 | M1-3 up   | + | mitochondrial membrane                         | GO:0031966 | Metabolism             | Bioenergetics  | C    | 297       | 8    | 1.52  | 5.27  | 1.74E-04    | 3.61E-02 |
| 1     | 6        | L1-3 vs. M1-3 | M1-3 up   | + | cellular process                               | GO:0009987 | Development            | Development    | P    | 12008     | 92   | 61.32 | 1.5   | 2.13E-07    | 1.28E-03 |
| 1     | 7        | L1-3 vs. M1-3 | M1-3 up   | + | cytoplasm                                      | GO:0005737 | Development            | Development    | C    | 14837     | 104  | 75.77 | 1.37  | 1.39E-06    | 7.25E-04 |
| 1     | 8        | L1-3 vs. M1-3 | M1-3 up   | + | cytosol                                        | GO:0005829 | Development            | Development    | C    | 3241      | 41   | 16.55 | 2.48  | 2.60E-08    | 2.71E-05 |
| 1     | 9        | L1-3 vs. M1-3 | M1-3 up   | + | membrane                                       | GO:0016020 | Development            | Development    | C    | 5493      | 49   | 28.05 | 1.75  | 4.56E-05    | 1.19E-02 |
| 1     | 10       | L1-3 vs. M1-3 | M1-3 up   | + | nuclear condensin complex                      | GO:0000799 | Development            | Development    | C    | 4         | 2    | 0.02  | 97.91 | 3.79E-04    | 4.94E-02 |
| 1     | 11       | L1-3 vs. M1-3 | M1-3 up   | + | organelle membrane                             | GO:0031090 | Development            | Development    | C    | 1458      | 22   | 7.45  | 2.95  | 5.68E-06    | 1.97E-03 |
| 2     | 12       | L4 vs. M4     | L4 up     | + | oxidoreductase activity                        | GO:0016491 | Metabolism             | Bioenergetics  | F    | 1458      | 34   | 13.35 | 2.55  | 7.59E-07    | 2.44E-03 |
| 2     | 13       | L4 vs. M4     | L4 up     | + | oxidoreductase activity, oxidizing metal ions  | GO:0016722 | Metabolism             | Bioenergetics  | F    | 15        | 4    | 0.14  | 29.13 | 2.30E-05    | 3.70E-02 |
|       |          |               |           | + | oxidoreductase activity, oxidizing metal ions, | GO:0016724 |                        |                |      |           |      |       |       |             |          |
| 2     | 14       | L4 vs. M4     | L4 up     |   | oxygen as acceptor                             |            | Metabolism             | Bioenergetics  | F    | 6         | 3    | 0.05  | 54.61 | 5.95E-05    | 4.78E-02 |
| 2     | 15       | L4 vs. M4     | L4 up     | - | nucleus                                        | GO:0005634 | Development            | Development    | C    | 10540     | 70   | 96.5  | 0.73  | 5.32E-04    | 3.69E-02 |
| 2     | 16       | L4 vs. M4     | L4 up     | + | cell wall                                      | GO:0005618 | Development            | Development    | C    | 565       | 16   | 5.17  | 3.09  | 9.08E-05    | 9.45E-03 |
| 2     | 17       | L4 vs. M4     | L4 up     | + | cytosol                                        | GO:0005829 | Development            | Development    | C    | 3241      | 54   | 29.67 | 1.82  | 1.34E-05    | 6.99E-03 |
| 2     | 18       | L4 vs. M4     | L4 up     | + | external encapsulating structure               | GO:0030312 | Development            | Development    | C    | 567       | 16   | 5.19  | 3.08  | 9.45E-05    | 8.94E-03 |
| 2     | 19       | L4 vs. M4     | L4 up     | + | extracellular region                           | GO:0005576 | Development            | Development    | C    | 3128      | 56   | 28.64 | 1.96  | 1.19E-06    | 1.24E-03 |
| 2     | 20       | L4 vs. M4     | L4 up     | + | membrane                                       | GO:0016020 | Development            | Development    | C    | 5493      | 74   | 50.29 | 1.47  | 3.56E-04    | 3.08E-02 |
| 2     | 21       | L4 vs. M4     | L4 up     | + | organelle subcompartment                       | GO:0031984 | Development            | Development    | C    | 1156      | 23   | 10.58 | 2.17  | 7.07E-04    | 4.60E-02 |
| 2     | 22       | L4 vs. M4     | L4 up     | + | ferroxidase activity                           | GO:0004322 | Metabolism             | Metabolism     | F    | 6         | 3    | 0.05  | 54.61 | 5.95E-05    | 6.38E-02 |
| 2     | 23       | L4 vs. M4     | L4 up     | + | polygalacturonase activity                     | GO:0004650 | Metabolism             | Metabolism     | F    | 69        | 6    | 0.63  | 9.5   | 6.27E-05    | 4.03E-02 |
| 2     | 24       | L4 vs. M4     | L4 up     | + | chloroplast stroma                             | GO:0009570 | Metabolism             | Photosynthesis | C    | 719       | 17   | 6.58  | 2.58  | 4.36E-04    | 3.49E-02 |
| 2     | 25       | L4 vs. M4     | L4 up     | + | chloroplast thylakoid                          | GO:0009534 | Metabolism             | Photosynthesis | C    | 443       | 14   | 4.06  | 3.45  | 8.28E-05    | 1.23E-02 |
| 2     | 26       | L4 vs. M4     | L4 up     | + | chloroplast thylakoid membrane                 | GO:0009535 | Metabolism             | Photosynthesis | C    | 358       | 13   | 3.28  | 3.97  | 3.85E-05    | 8.01E-03 |
| 2     | 27       | L4 vs. M4     | L4 up     | + | photosynthesis                                 | GO:0015979 | Metabolism             | Photosynthesis | P    | 189       | 11   | 1.73  | 6.36  | 2.37E-06    | 3.54E-03 |
| 2     | 28       | L4 vs. M4     | L4 up     | + | photosynthetic membrane                        | GO:0034357 | Metabolism             | Photosynthesis | C    | 395       | 14   | 3.62  | 3.87  | 2.51E-05    | 6.53E-03 |
| 2     | 29       | L4 vs. M4     | L4 up     | + | plastid stroma                                 | GO:0009532 | Metabolism             | Photosynthesis | C    | 731       | 17   | 6.69  | 2.54  | 5.23E-04    | 3.89E-02 |
| 2     | 30       | L4 vs. M4     | L4 up     | + | plastid thylakoid                              | GO:0031976 | Metabolism             | Photosynthesis | C    | 446       | 14   | 4.08  | 3.43  | 8.87E-05    | 1.15E-02 |
| 2     | 31       | L4 vs. M4     | L4 up     | + | plastid thylakoid membrane                     | GO:0055035 | Metabolism             | Photosynthesis | C    | 363       | 13   | 3.32  | 3.91  | 4.41E-05    | 7.65E-03 |
| 2     | 32       | L4 vs. M4     | L4 up     | + | thylakoid                                      | GO:0009579 | Metabolism             | Photosynthesis | C    | 537       | 17   | 4.92  | 3.46  | 1.41E-05    | 4.90E-03 |
| 2     | 33       | L4 vs. M4     | L4 up     | + | thylakoid membrane                             | GO:0042651 | Metabolism             | Photosynthesis | C    | 390       | 13   | 3.57  | 3.64  | 8.89E-05    | 1.03E-02 |
| 2     | 34       | L4 vs. M4     | L4 up     | + | response to inorganic substance                | GO:0010035 | Signaling and response | Signaling      | P    | 914       | 23   | 8.37  | 2.75  | 1.68E-05    | 2.00E-02 |
| 2     | 35       | L4 vs. M4     | L4 up     | + | response to temperature stimulus               | GO:0009266 | Signaling and response | Signaling      | P    | 617       | 21   | 5.65  | 3.72  | 4.40E-07    | 2.63E-03 |
| 2     | 36       | L4 vs. M4     | L4 up     | + | response to cold                               | GO:0009409 | Signaling and response | Stress         | P    | 415       | 16   | 3.8   | 4.21  | 2.36E-06    | 4.71E-03 |
| 2     | 37       | L4 vs. M4     | L4 up     | + | response to oxidative stress                   | GO:0006979 | Signaling and response | Stress         | P    | 460       | 17   | 4.21  | 4.04  | 1.98E-06    | 5.91E-03 |
| 2     | 38       | L4 vs. M4     | M4 up     | + | ATPase activity                                | GO:0016887 | Metabolism             | Bioenergetics  | F    | 512       | 18   | 6.54  | 2.75  | 1.56E-04    | 3.33E-02 |
| 2     | 39       | L4 vs. M4     | M4 up     | + | carbohydrate metabolic process                 | GO:0005975 | Metabolism             | Bioenergetics  | P    | 950       | 29   | 12.13 | 2.39  | 2.44E-05    | 3.40E-03 |
| 2     | 40       | L4 vs. M4     | M4 up     | + | cellular carbohydrate metabolic process        | GO:0044262 | Metabolism             | Bioenergetics  | P    | 384       | 14   | 4.9   | 2.86  | 5.85E-04    | 4.22E-02 |
| 2     | 41       | L4 vs. M4     | M4 up     | + | generation of precursor metabolites and energy | GO:0006091 | Metabolism             | Bioenergetics  | P    | 378       | 14   | 4.83  | 2.9   | 5.04E-04    | 3.77E-02 |
| 2     | 42       | L4 vs. M4     | M4 up     | + | oxidoreductase activity                        | GO:0016491 | Metabolism             | Bioenergetics  | F    | 1458      | 36   | 18.61 | 1.93  | 1.89E-04    | 3.80E-02 |
| 2     | 43       | L4 vs. M4     | M4 up     | + | primary metabolic process                      | GO:0044238 | Metabolism             | Bioenergetics  | P    | 7219      | 155  | 92.16 | 1.68  | 7.60E-13    | 7.58E-10 |
| 2     | 44       | L4 vs. M4     | M4 up     | + | alpha-amino acid catabolic process             | GO:1901606 | Metabolism             | Catabolism     | P    | 88        | 7    | 1.12  | 6.23  | 2.04E-04    | 1.79E-02 |
| 2     | 45       | L4 vs. M4     | M4 up     | + | carboxylic acid catabolic process              | GO:0046395 | Metabolism             | Catabolism     | P    | 162       | 10   | 2.07  | 4.84  | 7.02E-05    | 7.63E-03 |
| 2     | 46       | L4 vs. M4     | M4 up     | + | catabolic process                              | GO:0009056 | Metabolism             | Catabolism     | P    | 1469      | 50   | 18.75 | 2.67  | 5.36E-10    | 2.91E-07 |
| 2     | 47       | L4 vs. M4     | M4 up     | + | cellular amino acid catabolic process          | GO:0009063 | Metabolism             | Catabolism     | P    | 97        | 7    | 1.24  | 5.65  | 3.55E-04    | 2.91E-02 |
| 2     | 48       | L4 vs. M4     | M4 up     | + | cellular catabolic process                     | GO:0044248 | Metabolism             | Catabolism     | P    | 1223      | 43   | 15.61 | 2.75  | 3.97E-09    | 1.32E-06 |
| 2     | 49       | L4 vs. M4     | M4 up     | + | cellular macromolecule catabolic process       | GO:0044265 | Metabolism             | Catabolism     | P    | 736       | 24   | 9.4   | 2.55  | 4.11E-05    | 5.01E-03 |
| 2     | 50       | L4 vs. M4     | M4 up     | + | cysteine-type endopeptidase activity           | GO:0004197 | Metabolism             | Catabolism     | F    | 72        | 10   | 0.92  | 10.88 | 8.53E-08    | 1.37E-04 |
| 2     | 51       | L4 vs. M4     | M4 up     | + | endopeptidase activity                         | GO:0004175 | Metabolism             | Catabolism     | F    | 337       | 15   | 4.3   | 3.49  | 4.65E-05    | 1.36E-02 |
| 2     | 52       | L4 vs. M4     | M4 up     | + | lysosome                                       | GO:0005764 | Metabolism             | Catabolism     | C    | 46        | 8    | 0.59  | 13.62 | 3.70E-07    | 5.50E-05 |
| 2     | 53       | L4 vs. M4     | M4 up     | + | macromolecule catabolic process                | GO:0009057 | Metabolism             | Catabolism     | P    | 889       | 29   | 11.35 | 2.56  | 6.40E-06    | 1.13E-03 |
| 2     | 54       | L4 vs. M4     | M4 up     | + | organic acid catabolic process                 | GO:0016054 | Metabolism             | Catabolism     | P    | 162       | 10   | 2.07  | 4.84  | 7.02E-05    | 7.77E-03 |
| 2     | 55       | L4 vs. M4     | M4 up     | + | organic cyclic compound catabolic process      | GO:1901361 | Metabolism             | Catabolism     | P    | 210       | 10   | 2.68  | 3.73  | 5.14E-04    | 3.79E-02 |
| 2     | 56       | L4 vs. M4     | M4 up     | + | organic substance catabolic process            | GO:1901575 | Metabolism             | Catabolism     | P    | 1345      | 50   | 17.17 | 2.91  | 2.80E-11    | 2.09E-08 |

|   |     |           |       |   |                                                  |            |             |                |   |       |     |        |       |          |          |
|---|-----|-----------|-------|---|--------------------------------------------------|------------|-------------|----------------|---|-------|-----|--------|-------|----------|----------|
| 2 | 57  | L4 vs. M4 | M4 up | + | organonitrogen compound catabolic process        | GO:1901565 | Metabolism  | Catabolism     | P | 836   | 33  | 10.67  | 3.09  | 2.20E-08 | 5.97E-06 |
| 2 | 58  | L4 vs. M4 | M4 up | + | peptidase activity                               | GO:0008233 | Metabolism  | Catabolism     | F | 504   | 20  | 6.43   | 3.11  | 1.32E-05 | 6.05E-03 |
| 2 | 59  | L4 vs. M4 | M4 up | + | protein catabolic process                        | GO:0030163 | Metabolism  | Catabolism     | P | 612   | 19  | 7.81   | 2.43  | 4.65E-04 | 3.52E-02 |
| 2 | 60  | L4 vs. M4 | M4 up | + | proteolysis                                      | GO:0006508 | Metabolism  | Catabolism     | P | 812   | 26  | 10.37  | 2.51  | 2.64E-05 | 3.44E-03 |
| 2 | 61  | L4 vs. M4 | M4 up | + | small molecule catabolic process                 | GO:0044282 | Metabolism  | Catabolism     | P | 239   | 13  | 3.05   | 4.26  | 2.11E-05 | 3.01E-03 |
| 2 | 62  | L4 vs. M4 | M4 up | - | nucleus                                          | GO:0005634 | Development | Development    | C | 10540 | 105 | 134.56 | 0.78  | 1.30E-03 | 4.51E-02 |
| 2 | 63  | L4 vs. M4 | M4 up | + | bounding membrane of organelle                   | GO:0098588 | Development | Development    | C | 923   | 24  | 11.78  | 2.04  | 1.48E-03 | 4.81E-02 |
| 2 | 64  | L4 vs. M4 | M4 up | + | cell junction                                    | GO:0030054 | Development | Development    | C | 944   | 29  | 12.05  | 2.41  | 2.24E-05 | 1.30E-03 |
| 2 | 65  | L4 vs. M4 | M4 up | + | cell periphery                                   | GO:0071944 | Development | Development    | C | 4012  | 87  | 51.22  | 1.7   | 6.36E-07 | 8.28E-05 |
| 2 | 66  | L4 vs. M4 | M4 up | + | cell-cell junction                               | GO:0005911 | Development | Development    | C | 944   | 29  | 12.05  | 2.41  | 2.24E-05 | 1.56E-03 |
| 2 | 67  | L4 vs. M4 | M4 up | + | cellular anatomical entity                       | GO:0110165 | Development | Development    | C | 24430 | 333 | 311.88 | 1.07  | 1.21E-04 | 5.74E-03 |
| 2 | 68  | L4 vs. M4 | M4 up | + | cellular process                                 | GO:0009987 | Development | Development    | P | 12008 | 230 | 153.3  | 1.5   | 3.77E-16 | 1.13E-12 |
| 2 | 69  | L4 vs. M4 | M4 up | + | cytoplasm                                        | GO:0005737 | Development | Development    | C | 14837 | 267 | 189.41 | 1.41  | 1.76E-17 | 1.83E-14 |
| 2 | 70  | L4 vs. M4 | M4 up | + | cytosol                                          | GO:0005829 | Development | Development    | C | 3241  | 85  | 41.38  | 2.05  | 1.32E-10 | 4.58E-08 |
| 2 | 71  | L4 vs. M4 | M4 up | + | extracellular space                              | GO:0005615 | Development | Development    | C | 130   | 9   | 1.66   | 5.42  | 7.06E-05 | 3.68E-03 |
| 2 | 72  | L4 vs. M4 | M4 up | + | intracellular anatomical structure               | GO:0005622 | Development | Development    | C | 21464 | 308 | 274.02 | 1.12  | 4.11E-06 | 4.28E-04 |
| 2 | 73  | L4 vs. M4 | M4 up | + | lytic vacuole                                    | GO:0000323 | Development | Development    | C | 52    | 9   | 0.66   | 13.56 | 7.06E-08 | 1.47E-05 |
| 2 | 74  | L4 vs. M4 | M4 up | + | membrane                                         | GO:0016020 | Development | Development    | C | 5493  | 109 | 70.13  | 1.55  | 1.15E-06 | 1.33E-04 |
| 2 | 75  | L4 vs. M4 | M4 up | + | plasma membrane                                  | GO:0005886 | Development | Development    | C | 3534  | 73  | 45.12  | 1.62  | 3.90E-05 | 2.14E-03 |
| 2 | 76  | L4 vs. M4 | M4 up | + | symplast                                         | GO:0055044 | Development | Development    | C | 944   | 29  | 12.05  | 2.41  | 2.24E-05 | 1.46E-03 |
| 2 | 77  | L4 vs. M4 | M4 up | + | vacuolar membrane                                | GO:0005774 | Development | Development    | C | 570   | 19  | 7.28   | 2.61  | 1.98E-04 | 8.97E-03 |
| 2 | 78  | L4 vs. M4 | M4 up | + | vacuole                                          | GO:0005773 | Development | Development    | C | 1083  | 44  | 13.83  | 3.18  | 3.31E-11 | 1.72E-08 |
| 2 | 79  | L4 vs. M4 | M4 up | + | alpha-amino acid biosynthetic process            | GO:1901607 | Metabolism  | Metabolism     | P | 181   | 11  | 2.31   | 4.76  | 3.51E-05 | 4.38E-03 |
| 2 | 80  | L4 vs. M4 | M4 up | + | alpha-amino acid metabolic process               | GO:1901605 | Metabolism  | Metabolism     | P | 278   | 15  | 3.55   | 4.23  | 5.44E-06 | 9.85E-04 |
| 2 | 81  | L4 vs. M4 | M4 up | + | anchoring junction                               | GO:0070161 | Metabolism  | Metabolism     | C | 944   | 29  | 12.05  | 2.41  | 2.24E-05 | 1.37E-03 |
| 2 | 82  | L4 vs. M4 | M4 up | + | aromatic amino acid family metabolic process     | GO:0009072 | Metabolism  | Metabolism     | P | 87    | 9   | 1.11   | 8.1   | 3.59E-06 | 6.92E-04 |
| 2 | 83  | L4 vs. M4 | M4 up | + | biological_process                               | GO:0008150 | Metabolism  | Metabolism     | P | 21988 | 311 | 280.7  | 1.11  | 2.45E-05 | 3.33E-03 |
| 2 | 84  | L4 vs. M4 | M4 up | + | biosynthetic process                             | GO:0009058 | Metabolism  | Metabolism     | P | 2811  | 74  | 35.89  | 2.06  | 2.84E-09 | 1.00E-06 |
| 2 | 85  | L4 vs. M4 | M4 up | + | carboxylic acid biosynthetic process             | GO:0046394 | Metabolism  | Metabolism     | P | 468   | 21  | 5.97   | 3.51  | 1.29E-06 | 2.75E-04 |
| 2 | 86  | L4 vs. M4 | M4 up | + | carboxylic acid metabolic process                | GO:0019752 | Metabolism  | Metabolism     | P | 912   | 36  | 11.64  | 3.09  | 4.83E-09 | 1.52E-06 |
| 2 | 87  | L4 vs. M4 | M4 up | + | catalytic activity                               | GO:0003824 | Metabolism  | Metabolism     | F | 8380  | 182 | 106.98 | 1.7   | 1.64E-16 | 5.28E-13 |
| 2 | 88  | L4 vs. M4 | M4 up | + | cellular amino acid biosynthetic process         | GO:0008652 | Metabolism  | Metabolism     | P | 200   | 13  | 2.55   | 5.09  | 3.48E-06 | 6.93E-04 |
| 2 | 89  | L4 vs. M4 | M4 up | + | cellular amino acid metabolic process            | GO:0006520 | Metabolism  | Metabolism     | P | 391   | 20  | 4.99   | 4.01  | 3.35E-07 | 8.00E-05 |
| 2 | 90  | L4 vs. M4 | M4 up | + | cellular biosynthetic process                    | GO:0044249 | Metabolism  | Metabolism     | P | 2583  | 63  | 32.98  | 1.91  | 8.30E-07 | 1.91E-04 |
| 2 | 91  | L4 vs. M4 | M4 up | + | cellular metabolic process                       | GO:0044237 | Metabolism  | Metabolism     | P | 7649  | 163 | 97.65  | 1.67  | 2.03E-13 | 3.03E-10 |
| 2 | 92  | L4 vs. M4 | M4 up | + | cellular nitrogen compound metabolic process     | GO:0034641 | Metabolism  | Metabolism     | P | 2872  | 61  | 36.66  | 1.66  | 1.02E-04 | 9.99E-03 |
| 2 | 93  | L4 vs. M4 | M4 up | + | cysteine-type peptidase activity                 | GO:0008234 | Metabolism  | Metabolism     | F | 101   | 10  | 1.29   | 7.76  | 1.49E-06 | 1.59E-03 |
| 2 | 94  | L4 vs. M4 | M4 up | + | hydrolase activity                               | GO:0016787 | Metabolism  | Metabolism     | F | 2995  | 69  | 38.23  | 1.8   | 1.75E-06 | 1.40E-03 |
| 2 | 95  | L4 vs. M4 | M4 up | + | macromolecule metabolic process                  | GO:0043170 | Metabolism  | Metabolism     | P | 5496  | 100 | 70.16  | 1.43  | 1.62E-04 | 1.44E-02 |
| 2 | 96  | L4 vs. M4 | M4 up | + | metabolic process                                | GO:0008152 | Metabolism  | Metabolism     | P | 8681  | 197 | 110.82 | 1.78  | 5.96E-21 | 3.56E-17 |
| 2 | 97  | L4 vs. M4 | M4 up | + | molecular_function                               | GO:0003674 | Metabolism  | Metabolism     | F | 21945 | 313 | 280.16 | 1.12  | 3.88E-06 | 2.08E-03 |
| 2 | 98  | L4 vs. M4 | M4 up | + | monocarboxylic acid metabolic process            | GO:0032787 | Metabolism  | Metabolism     | P | 439   | 17  | 5.6    | 3.03  | 7.79E-05 | 8.03E-03 |
| 2 | 99  | L4 vs. M4 | M4 up | + | nitrogen compound metabolic process              | GO:0006807 | Metabolism  | Metabolism     | P | 6150  | 129 | 78.51  | 1.64  | 1.47E-09 | 6.77E-07 |
| 2 | 100 | L4 vs. M4 | M4 up | + | organic acid biosynthetic process                | GO:0016053 | Metabolism  | Metabolism     | P | 468   | 21  | 5.97   | 3.51  | 1.29E-06 | 2.85E-04 |
| 2 | 101 | L4 vs. M4 | M4 up | + | organic acid metabolic process                   | GO:0006082 | Metabolism  | Metabolism     | P | 1019  | 39  | 13.01  | 3     | 2.41E-09 | 9.00E-07 |
| 2 | 102 | L4 vs. M4 | M4 up | + | organic cyclic compound metabolic process        | GO:1901360 | Metabolism  | Metabolism     | P | 2607  | 56  | 33.28  | 1.68  | 1.56E-04 | 1.42E-02 |
| 2 | 103 | L4 vs. M4 | M4 up | + | organic substance biosynthetic process           | GO:1901576 | Metabolism  | Metabolism     | P | 2674  | 70  | 34.14  | 2.05  | 1.17E-08 | 3.34E-06 |
| 2 | 104 | L4 vs. M4 | M4 up | + | organic substance metabolic process              | GO:0071704 | Metabolism  | Metabolism     | P | 7851  | 171 | 100.23 | 1.71  | 2.68E-15 | 5.34E-12 |
| 2 | 105 | L4 vs. M4 | M4 up | + | organonitrogen compound biosynthetic process     | GO:1901566 | Metabolism  | Metabolism     | P | 1343  | 37  | 17.15  | 2.16  | 1.70E-05 | 2.61E-03 |
| 2 | 106 | L4 vs. M4 | M4 up | + | organonitrogen compound metabolic process        | GO:1901564 | Metabolism  | Metabolism     | P | 4611  | 105 | 58.87  | 1.78  | 1.64E-09 | 7.00E-07 |
| 2 | 107 | L4 vs. M4 | M4 up | + | oxidation-reduction process                      | GO:0055114 | Metabolism  | Metabolism     | P | 768   | 26  | 9.8    | 2.65  | 1.05E-05 | 1.65E-03 |
| 2 | 108 | L4 vs. M4 | M4 up | + | oxoacid metabolic process                        | GO:0043436 | Metabolism  | Metabolism     | P | 1016  | 39  | 12.97  | 3.01  | 2.23E-09 | 8.88E-07 |
| 2 | 109 | L4 vs. M4 | M4 up | + | small molecule biosynthetic process              | GO:0044283 | Metabolism  | Metabolism     | P | 645   | 24  | 8.23   | 2.91  | 5.17E-06 | 9.65E-04 |
| 2 | 110 | L4 vs. M4 | M4 up | + | small molecule metabolic process                 | GO:0044281 | Metabolism  | Metabolism     | P | 1520  | 51  | 19.4   | 2.63  | 5.67E-10 | 2.82E-07 |
| 2 | 111 | L4 vs. M4 | M4 up | + | chloroplast                                      | GO:0009507 | Metabolism  | Photosynthesis | C | 5013  | 105 | 64     | 1.64  | 1.48E-07 | 2.57E-05 |
| 2 | 112 | L4 vs. M4 | M4 up | + | chloroplast envelope                             | GO:0009941 | Metabolism  | Photosynthesis | C | 613   | 19  | 7.83   | 2.43  | 4.74E-04 | 1.97E-02 |
| 2 | 113 | L4 vs. M4 | M4 up | + | chloroplast stroma                               | GO:0009570 | Metabolism  | Photosynthesis | C | 719   | 25  | 9.18   | 2.72  | 1.01E-05 | 8.76E-04 |
| 2 | 114 | L4 vs. M4 | M4 up | + | photosynthesis                                   | GO:0015979 | Metabolism  | Photosynthesis | P | 189   | 10  | 2.41   | 4.14  | 2.32E-04 | 2.01E-02 |
| 2 | 115 | L4 vs. M4 | M4 up | + | photosynthetic electron transport in photosystem | GO:0009772 | Metabolism  | Photosynthesis | P | 11    | 3   | 0.14   | 21.36 | 6.52E-04 | 4.59E-02 |
| 2 | 116 | L4 vs. M4 | M4 up | + | photosystem                                      | GO:0009521 | Metabolism  | Photosynthesis | C | 63    | 6   | 0.8    | 7.46  | 2.36E-04 | 1.02E-02 |
| 2 | 117 | L4 vs. M4 | M4 up | + | photosystem II reaction center                   | GO:0009539 | Metabolism  | Photosynthesis | C | 11    | 3   | 0.14   | 21.36 | 6.52E-04 | 2.42E-02 |
| 2 | 118 | L4 vs. M4 | M4 up | + | plastid                                          | GO:0009536 | Metabolism  | Photosynthesis | C | 5432  | 119 | 69.35  | 1.72  | 6.10E-10 | 1.59E-07 |

|   |     |               |         |   |                                                                                  |            |                        |                |   |      |     |       |          |          |          |
|---|-----|---------------|---------|---|----------------------------------------------------------------------------------|------------|------------------------|----------------|---|------|-----|-------|----------|----------|----------|
| 2 | 119 | L4 vs. M4     | M4 up   | + | plastid envelope                                                                 | GO:0009526 | Metabolism             | Photosynthesis | C | 637  | 21  | 8.13  | 2.58     | 1.07E-04 | 5.31E-03 |
| 2 | 120 | L4 vs. M4     | M4 up   | + | plastid large ribosomal subunit                                                  | GO:0000311 | Metabolism             | Photosynthesis | C | 15   | 3   | 0.19  | 15.67    | 1.41E-03 | 4.73E-02 |
| 2 | 121 | L4 vs. M4     | M4 up   | + | plastid ribosome                                                                 | GO:0009547 | Metabolism             | Photosynthesis | C | 29   | 4   | 0.37  | 10.8     | 7.61E-04 | 2.73E-02 |
| 2 | 122 | L4 vs. M4     | M4 up   | + | plastid stroma                                                                   | GO:0009532 | Metabolism             | Photosynthesis | C | 731  | 26  | 9.33  | 2.79     | 4.55E-06 | 4.30E-04 |
| 2 | 123 | L4 vs. M4     | M4 up   | + | cellular response to chemical stimulus                                           | GO:0070887 | Signaling and response | Signaling      | P | 1085 | 29  | 13.85 | 2.09     | 2.70E-04 | 2.28E-02 |
| 2 | 124 | L4 vs. M4     | M4 up   | + | cellular response to oxygen levels                                               | GO:0071453 | Signaling and response | Signaling      | P | 238  | 12  | 3.04  | 3.95     | 8.73E-05 | 8.70E-03 |
| 2 | 125 | L4 vs. M4     | M4 up   | + | cellular response to stimulus                                                    | GO:0051716 | Signaling and response | Signaling      | P | 2511 | 56  | 32.06 | 1.75     | 5.43E-05 | 6.37E-03 |
| 2 | 126 | L4 vs. M4     | M4 up   | + | response to abiotic stimulus                                                     | GO:0009628 | Signaling and response | Signaling      | P | 2131 | 60  | 27.2  | 2.21     | 1.08E-08 | 3.24E-06 |
| 2 | 127 | L4 vs. M4     | M4 up   | + | response to biotic stimulus                                                      | GO:0009607 | Signaling and response | Signaling      | P | 1098 | 33  | 14.02 | 2.35     | 8.12E-06 | 1.31E-03 |
| 2 | 128 | L4 vs. M4     | M4 up   | + | response to chemical                                                             | GO:0042221 | Signaling and response | Signaling      | P | 2681 | 79  | 34.23 | 2.31     | 3.45E-12 | 2.94E-09 |
| 2 | 129 | L4 vs. M4     | M4 up   | + | response to external biotic stimulus                                             | GO:0043207 | Signaling and response | Signaling      | P | 1097 | 33  | 14    | 2.36     | 7.99E-06 | 1.36E-03 |
| 2 | 130 | L4 vs. M4     | M4 up   | + | response to external stimulus                                                    | GO:0009605 | Signaling and response | Signaling      | P | 1513 | 45  | 19.32 | 2.33     | 2.31E-07 | 5.75E-05 |
| 2 | 131 | L4 vs. M4     | M4 up   | + | response to inorganic substance                                                  | GO:0010035 | Signaling and response | Signaling      | P | 914  | 28  | 11.67 | 2.4      | 3.30E-05 | 4.20E-03 |
| 2 | 132 | L4 vs. M4     | M4 up   | + | response to jasmonic acid                                                        | GO:0009753 | Signaling and response | Signaling      | P | 175  | 10  | 2.23  | 4.48     | 1.28E-04 | 1.20E-02 |
| 2 | 133 | L4 vs. M4     | M4 up   | + | response to lipid                                                                | GO:0033993 | Signaling and response | Signaling      | P | 672  | 21  | 8.58  | 2.45     | 3.53E-04 | 2.93E-02 |
| 2 | 134 | L4 vs. M4     | M4 up   | + | response to organic cyclic compound                                              | GO:0014070 | Signaling and response | Signaling      | P | 280  | 12  | 3.57  | 3.36     | 3.66E-04 | 2.92E-02 |
| 2 | 135 | L4 vs. M4     | M4 up   | + | response to organic substance                                                    | GO:0010033 | Signaling and response | Signaling      | P | 1705 | 49  | 21.77 | 2.25     | 1.78E-07 | 4.63E-05 |
| 2 | 136 | L4 vs. M4     | M4 up   | + | response to oxygen levels                                                        | GO:0070482 | Signaling and response | Signaling      | P | 267  | 13  | 3.41  | 3.81     | 6.27E-05 | 7.08E-03 |
| 2 | 137 | L4 vs. M4     | M4 up   | + | response to oxygen-containing compound                                           | GO:1901700 | Signaling and response | Signaling      | P | 1514 | 53  | 19.33 | 2.74     | 5.62E-11 | 3.73E-08 |
| 2 | 138 | L4 vs. M4     | M4 up   | + | response to salicylic acid                                                       | GO:0009751 | Signaling and response | Signaling      | P | 155  | 9   | 1.98  | 4.55     | 2.48E-04 | 2.12E-02 |
| 2 | 139 | L4 vs. M4     | M4 up   | + | response to stimulus                                                             | GO:0050896 | Signaling and response | Signaling      | P | 5578 | 131 | 71.21 | 1.84     | 2.70E-13 | 3.23E-10 |
| 2 | 140 | L4 vs. M4     | M4 up   | + | aging                                                                            | GO:0007568 | Signaling and response | Stress         | P | 132  | 8   | 1.69  | 4.75     | 4.15E-04 | 3.23E-02 |
| 2 | 141 | L4 vs. M4     | M4 up   | + | cellular response to decreased oxygen levels                                     | GO:0036294 | Signaling and response | Stress         | P | 237  | 12  | 3.03  | 3.97     | 8.40E-05 | 8.51E-03 |
| 2 | 142 | L4 vs. M4     | M4 up   | + | cellular response to hypoxia                                                     | GO:0071456 | Signaling and response | Stress         | P | 235  | 12  | 3     | 4        | 7.78E-05 | 8.16E-03 |
| 2 | 143 | L4 vs. M4     | M4 up   | + | cellular response to stress                                                      | GO:0033554 | Signaling and response | Stress         | P | 1120 | 31  | 14.3  | 2.17     | 7.15E-05 | 7.63E-03 |
| 2 | 144 | L4 vs. M4     | M4 up   | + | defense response                                                                 | GO:0006952 | Signaling and response | Stress         | P | 953  | 26  | 12.17 | 2.14     | 3.64E-04 | 2.94E-02 |
| 2 | 145 | L4 vs. M4     | M4 up   | + | defense response to fungus                                                       | GO:0050832 | Signaling and response | Stress         | P | 252  | 12  | 3.22  | 3.73     | 1.46E-04 | 1.34E-02 |
| 2 | 146 | L4 vs. M4     | M4 up   | + | defense response to other organism                                               | GO:0098542 | Signaling and response | Stress         | P | 807  | 23  | 10.3  | 2.23     | 4.16E-04 | 3.19E-02 |
| 2 | 147 | L4 vs. M4     | M4 up   | + | interspecies interaction between organisms                                       | GO:0044419 | Signaling and response | Stress         | P | 1125 | 33  | 14.36 | 2.3      | 1.74E-05 | 2.61E-03 |
| 2 | 148 | L4 vs. M4     | M4 up   | + | response to abscisic acid                                                        | GO:0009737 | Signaling and response | Stress         | P | 497  | 18  | 6.34  | 2.84     | 1.09E-04 | 1.05E-02 |
| 2 | 149 | L4 vs. M4     | M4 up   | + | response to alcohol                                                              | GO:0097305 | Signaling and response | Stress         | P | 501  | 18  | 6.4   | 2.81     | 1.20E-04 | 1.14E-02 |
| 2 | 150 | L4 vs. M4     | M4 up   | + | response to decreased oxygen levels                                              | GO:0036293 | Signaling and response | Stress         | P | 265  | 13  | 3.38  | 3.84     | 5.83E-05 | 6.71E-03 |
| 2 | 151 | L4 vs. M4     | M4 up   | + | response to fungus                                                               | GO:0009620 | Signaling and response | Stress         | P | 350  | 16  | 4.47  | 3.58     | 1.92E-05 | 2.79E-03 |
| 2 | 152 | L4 vs. M4     | M4 up   | + | response to hypoxia                                                              | GO:0001666 | Signaling and response | Stress         | P | 261  | 13  | 3.33  | 3.9      | 5.03E-05 | 6.02E-03 |
| 2 | 153 | L4 vs. M4     | M4 up   | + | response to other organism                                                       | GO:0051707 | Signaling and response | Stress         | P | 1097 | 33  | 14    | 2.36     | 7.99E-06 | 1.33E-03 |
| 2 | 154 | L4 vs. M4     | M4 up   | + | response to stress                                                               | GO:0006950 | Signaling and response | Stress         | P | 3106 | 82  | 39.65 | 2.07     | 3.08E-10 | 1.84E-07 |
| 2 | 155 | L4 vs. M4     | M4 up   | + | response to wounding                                                             | GO:0009611 | Signaling and response | Stress         | P | 227  | 14  | 2.9   | 4.83     | 2.62E-06 | 5.40E-04 |
| 2 | 156 | L4 vs. M4     | M4 up   | + | RNA binding                                                                      | GO:0003723 | Regulation             | Transcription  | F | 1569 | 40  | 20.03 | 2        | 4.27E-05 | 1.37E-02 |
| 2 | 157 | L4 vs. M4     | M4 up   | + | box C/D snoRNP complex                                                           | GO:0031428 | Regulation             | Translation    | C | 11   | 3   | 0.14  | 21.36    | 6.52E-04 | 2.51E-02 |
| 2 | 158 | L4 vs. M4     | M4 up   | + | mRNA binding                                                                     | GO:0003729 | Regulation             | Translation    | F | 1005 | 29  | 12.83 | 2.26     | 7.95E-05 | 1.96E-02 |
| 2 | 159 | L4 vs. M4     | M4 up   | + | organellar ribosome                                                              | GO:0000313 | Regulation             | Translation    | C | 75   | 6   | 0.96  | 6.27     | 5.64E-04 | 2.26E-02 |
| 2 | 160 | L4 vs. M4     | M4 up   | + | anion transport                                                                  | GO:0006820 | Metabolism             | Transporters   | P | 283  | 12  | 3.61  | 3.32     | 4.01E-04 | 3.16E-02 |
|   |     |               |         | + | ATPase-coupled transmembrane transporter activity                                | GO:0042626 |                        |                |   |      |     | 4.53  | 5.33E-05 | 1.43E-02 |          |
| 2 | 161 | L4 vs. M4     | M4 up   |   |                                                                                  |            | Metabolism             | Transporters   | F | 190  | 11  | 2.43  |          |          |          |
| 2 | 162 | L4 vs. M4     | M4 up   | + | plasmodesma                                                                      | GO:0009506 | Metabolism             | Transporters   | C | 944  | 29  | 12.05 | 2.41     | 2.24E-05 | 1.67E-03 |
| 2 | 163 | L4 vs. M4     | M4 up   | + | primary active transmembrane transporter                                         | GO:0015399 | Metabolism             | Transporters   | F | 213  | 11  | 2.72  | 4.05     | 1.40E-04 | 3.21E-02 |
| 2 | 164 | L4 vs. M4     | M4 up   | + | secretory vesicle                                                                | GO:0099503 | Metabolism             | Transporters   | C | 170  | 11  | 2.17  | 5.07     | 2.04E-05 | 1.63E-03 |
| 2 | 165 | L4 vs. M4     | M4 up   | + | transmembrane transport                                                          | GO:0055085 | Metabolism             | Transporters   | P | 859  | 24  | 10.97 | 2.19     | 5.33E-04 | 3.89E-02 |
| 2 | 166 | L4 vs. M4     | M4 up   | + | transmembrane transporter activity                                               | GO:0022857 | Metabolism             | Transporters   | F | 1242 | 35  | 15.86 | 2.21     | 1.64E-05 | 6.61E-03 |
| 2 | 167 | L4 vs. M4     | M4 up   | + | transport                                                                        | GO:0006810 | Metabolism             | Transporters   | P | 2261 | 48  | 28.86 | 1.66     | 5.93E-04 | 4.22E-02 |
| 2 | 168 | L4 vs. M4     | M4 up   | + | transporter activity                                                             | GO:0005215 | Metabolism             | Transporters   | F | 1287 | 35  | 16.43 | 2.13     | 3.73E-05 | 1.33E-02 |
| 3 | 169 | F2-3 vs. L2-3 | F2-3 up | + | acetyl-CoA biosynthetic process                                                  | GO:0006085 | Metabolism             | Bioenergetics  | P | 15   | 5   | 0.6   | 8.29     | 8.15E-04 | 1.87E-02 |
| 3 | 170 | F2-3 vs. L2-3 | F2-3 up | + | acetyl-CoA metabolic process                                                     | GO:0006084 | Metabolism             | Bioenergetics  | P | 25   | 6   | 1     | 5.97     | 1.05E-03 | 2.29E-02 |
| 3 | 171 | F2-3 vs. L2-3 | F2-3 up | + | acyl-CoA biosynthetic process                                                    | GO:0071616 | Metabolism             | Bioenergetics  | P | 21   | 5   | 0.84  | 5.92     | 2.85E-03 | 4.90E-02 |
| 3 | 172 | F2-3 vs. L2-3 | F2-3 up | + | aerobic respiration                                                              | GO:0009060 | Metabolism             | Bioenergetics  | P | 89   | 15  | 3.58  | 4.19     | 1.11E-05 | 4.52E-04 |
| 3 | 173 | F2-3 vs. L2-3 | F2-3 up | + | aldehyde dehydrogenase (NAD+) activity                                           | GO:0004029 | Metabolism             | Bioenergetics  | F | 12   | 6   | 0.48  | 12.44    | 4.09E-05 | 3.13E-03 |
| 3 | 174 | F2-3 vs. L2-3 | F2-3 up | + | aldehyde dehydrogenase [NAD(P)+] activity                                        | GO:0004030 | Metabolism             | Bioenergetics  | F | 12   | 6   | 0.48  | 12.44    | 4.09E-05 | 3.20E-03 |
| 3 | 175 | F2-3 vs. L2-3 | F2-3 up | + | ATP metabolic process                                                            | GO:0046034 | Metabolism             | Bioenergetics  | P | 144  | 15  | 5.79  | 2.59     | 1.32E-03 | 2.66E-02 |
| 3 |     | F2-3 vs. L2-3 | F2-3 up | + | ATPase activity, coupled to transmembrane movement of ions, rotational mechanism | GO:0044769 |                        |                |   |      |     | 7.96  | 2.84E-05 | 2.34E-03 |          |
|   | 176 |               |         |   |                                                                                  |            | Metabolism             | Bioenergetics  | F | 25   | 8   | 1     |          |          |          |
| 3 | 177 | F2-3 vs. L2-3 | F2-3 up | + | carbohydrate biosynthetic process                                                | GO:0016051 | Metabolism             | Bioenergetics  | P | 303  | 44  | 12.18 | 3.61     | 5.03E-12 | 9.12E-10 |
| 3 | 178 | F2-3 vs. L2-3 | F2-3 up | + | carbohydrate catabolic process                                                   | GO:0016052 | Metabolism             | Bioenergetics  | P | 234  | 27  | 9.41  | 2.87     | 3.71E-06 | 1.77E-04 |

|   |     |               |         |   |                                                                                                                                                                      |            |            |               |   |      |     |        |       |          |          |
|---|-----|---------------|---------|---|----------------------------------------------------------------------------------------------------------------------------------------------------------------------|------------|------------|---------------|---|------|-----|--------|-------|----------|----------|
| 3 | 179 | F2-3 vs. L2-3 | F2-3 up | + | carbohydrate derivative biosynthetic process                                                                                                                         | GO:1901137 | Metabolism | Bioenergetics | P | 458  | 42  | 18.41  | 2.28  | 2.98E-06 | 1.48E-04 |
| 3 | 180 | F2-3 vs. L2-3 | F2-3 up | + | carbohydrate derivative metabolic process                                                                                                                            | GO:1901135 | Metabolism | Bioenergetics | P | 746  | 69  | 29.99  | 2.3   | 1.50E-09 | 1.52E-07 |
| 3 | 181 | F2-3 vs. L2-3 | F2-3 up | + | carbohydrate metabolic process                                                                                                                                       | GO:0005975 | Metabolism | Bioenergetics | P | 950  | 102 | 38.19  | 2.67  | 1.23E-17 | 4.60E-15 |
| 3 | 182 | F2-3 vs. L2-3 | F2-3 up | + | cellular carbohydrate biosynthetic process                                                                                                                           | GO:0034637 | Metabolism | Bioenergetics | P | 213  | 30  | 8.56   | 3.5   | 2.25E-08 | 1.82E-06 |
| 3 | 183 | F2-3 vs. L2-3 | F2-3 up | + | cellular carbohydrate metabolic process                                                                                                                              | GO:0044262 | Metabolism | Bioenergetics | P | 384  | 46  | 15.44  | 2.98  | 5.49E-10 | 6.32E-08 |
| 3 | 184 | F2-3 vs. L2-3 | F2-3 up | + | cellular polysaccharide biosynthetic process                                                                                                                         | GO:0033692 | Metabolism | Bioenergetics | P | 177  | 24  | 7.11   | 3.37  | 1.03E-06 | 6.16E-05 |
| 3 | 185 | F2-3 vs. L2-3 | F2-3 up | + | cellular polysaccharide metabolic process                                                                                                                            | GO:0044264 | Metabolism | Bioenergetics | P | 270  | 33  | 10.85  | 3.04  | 9.72E-08 | 7.35E-06 |
| 3 | 186 | F2-3 vs. L2-3 | F2-3 up | + | cellular respiration                                                                                                                                                 | GO:0045333 | Metabolism | Bioenergetics | P | 139  | 16  | 5.59   | 2.86  | 3.45E-04 | 9.18E-03 |
| 3 | 187 | F2-3 vs. L2-3 | F2-3 up | + | electron transport chain                                                                                                                                             | GO:0022900 | Metabolism | Bioenergetics | P | 114  | 14  | 4.58   | 3.06  | 4.42E-04 | 1.12E-02 |
| 3 |     | F2-3 vs. L2-3 | F2-3 up | + | energy derivation by oxidation of organic compounds                                                                                                                  | GO:0015980 |            |               |   |      |     |        | 3.07  | 4.34E-05 | 1.54E-03 |
|   | 188 |               |         |   |                                                                                                                                                                      |            | Metabolism | Bioenergetics | P | 154  | 19  | 6.19   |       |          |          |
| 3 | 189 | F2-3 vs. L2-3 | F2-3 up | + | fatty acid biosynthetic process                                                                                                                                      | GO:0006633 | Metabolism | Bioenergetics | P | 134  | 16  | 5.39   | 2.97  | 2.38E-04 | 6.65E-03 |
| 3 | 190 | F2-3 vs. L2-3 | F2-3 up | + | fatty acid derivative metabolic process                                                                                                                              | GO:1901568 | Metabolism | Bioenergetics | P | 43   | 7   | 1.73   | 4.05  | 2.95E-03 | 4.93E-02 |
| 3 | 191 | F2-3 vs. L2-3 | F2-3 up | + | fatty acid metabolic process                                                                                                                                         | GO:0006631 | Metabolism | Bioenergetics | P | 221  | 25  | 8.88   | 2.81  | 1.14E-05 | 4.61E-04 |
| 3 | 192 | F2-3 vs. L2-3 | F2-3 up | + | generation of precursor metabolites and energy                                                                                                                       | GO:0006091 | Metabolism | Bioenergetics | P | 378  | 51  | 15.19  | 3.36  | 1.24E-12 | 2.48E-10 |
| 3 | 193 | F2-3 vs. L2-3 | F2-3 up | + | glucose 6-phosphate metabolic process                                                                                                                                | GO:0051156 | Metabolism | Bioenergetics | P | 42   | 7   | 1.69   | 4.15  | 2.63E-03 | 4.60E-02 |
| 3 | 194 | F2-3 vs. L2-3 | F2-3 up | + | glucose metabolic process                                                                                                                                            | GO:0006006 | Metabolism | Bioenergetics | P | 42   | 8   | 1.69   | 4.74  | 6.15E-04 | 1.47E-02 |
| 3 |     | F2-3 vs. L2-3 | F2-3 up | + | glyceraldehyde-3-phosphate dehydrogenase (NAD+) (non-phosphorylating) activity                                                                                       | GO:0043878 |            |               |   |      |     |        | 12.44 | 8.56E-04 | 3.87E-02 |
|   | 195 |               |         |   |                                                                                                                                                                      |            | Metabolism | Bioenergetics | F | 8    | 4   | 0.32   |       |          |          |
| 3 | 196 | F2-3 vs. L2-3 | F2-3 up | + | hexose metabolic process                                                                                                                                             | GO:0019318 | Metabolism | Bioenergetics | P | 88   | 11  | 3.54   | 3.11  | 1.54E-03 | 2.99E-02 |
| 3 | 197 | F2-3 vs. L2-3 | F2-3 up | + | monosaccharide biosynthetic process                                                                                                                                  | GO:0046364 | Metabolism | Bioenergetics | P | 48   | 8   | 1.93   | 4.15  | 1.33E-03 | 2.66E-02 |
| 3 | 198 | F2-3 vs. L2-3 | F2-3 up | + | NAD binding                                                                                                                                                          | GO:0051287 | Metabolism | Bioenergetics | F | 77   | 13  | 3.1    | 4.2   | 4.15E-05 | 3.10E-03 |
| 3 | 199 | F2-3 vs. L2-3 | F2-3 up | + | NAD(P)H dehydrogenase complex                                                                                                                                        | GO:0010598 | Metabolism | Bioenergetics | C | 12   | 4   | 0.48   | 8.29  | 2.78E-03 | 4.26E-02 |
| 3 | 200 | F2-3 vs. L2-3 | F2-3 up | + | NADH dehydrogenase activity                                                                                                                                          | GO:0003954 | Metabolism | Bioenergetics | F | 49   | 9   | 1.97   | 4.57  | 3.60E-04 | 2.00E-02 |
| 3 | 201 | F2-3 vs. L2-3 | F2-3 up | + | NADP binding                                                                                                                                                         | GO:0050661 | Metabolism | Bioenergetics | F | 68   | 10  | 2.73   | 3.66  | 8.27E-04 | 3.80E-02 |
| 3 | 202 | F2-3 vs. L2-3 | F2-3 up | + | NADPH regeneration                                                                                                                                                   | GO:0006740 | Metabolism | Bioenergetics | P | 35   | 7   | 1.41   | 4.98  | 1.04E-03 | 2.28E-02 |
| 3 | 203 | F2-3 vs. L2-3 | F2-3 up | + | oxidoreductase activity                                                                                                                                              | GO:0016491 | Metabolism | Bioenergetics | F | 1458 | 167 | 58.61  | 2.85  | 1.10E-31 | 1.76E-28 |
| 3 |     | F2-3 vs. L2-3 | F2-3 up | + | oxidoreductase activity, acting on CH-OH group of donors                                                                                                             | GO:0016614 |            |               |   |      |     |        | 2.85  | 2.14E-05 | 1.91E-03 |
|   | 204 |               |         |   |                                                                                                                                                                      |            | Metabolism | Bioenergetics | F | 201  | 23  | 8.08   |       |          |          |
| 3 | 205 | F2-3 vs. L2-3 | F2-3 up | + | oxidoreductase activity, acting on NAD(P)H                                                                                                                           | GO:0016651 | Metabolism | Bioenergetics | F | 121  | 21  | 4.86   | 4.32  | 1.35E-07 | 2.07E-05 |
| 3 |     | F2-3 vs. L2-3 | F2-3 up | + | oxidoreductase activity, acting on paired donors, with incorporation or reduction of molecular oxygen, NAD(P)H as one donor, and incorporation of one atom of oxygen | GO:0016705 |            |               |   |      |     |        | 2.28  | 1.93E-05 | 1.77E-03 |
|   | 206 |               |         |   |                                                                                                                                                                      |            | Metabolism | Bioenergetics | F | 392  | 36  | 15.76  |       |          |          |
| 3 |     | F2-3 vs. L2-3 | F2-3 up | + | oxidoreductase activity, acting on paired donors, with incorporation or reduction of molecular oxygen, NAD(P)H as one donor, and incorporation of one atom of oxygen | GO:0016709 |            |               |   |      |     |        | 2.71  | 6.05E-04 | 2.99E-02 |
|   | 207 |               |         |   |                                                                                                                                                                      |            | Metabolism | Bioenergetics | F | 147  | 16  | 5.91   |       |          |          |
| 3 |     | F2-3 vs. L2-3 | F2-3 up | + | oxidoreductase activity, acting on single donors with incorporation of molecular oxygen                                                                              | GO:0016701 |            |               |   |      |     |        | 5.89  | 6.74E-05 | 4.81E-03 |
|   | 208 |               |         |   |                                                                                                                                                                      |            | Metabolism | Bioenergetics | F | 38   | 9   | 1.53   |       |          |          |
| 3 |     | F2-3 vs. L2-3 | F2-3 up | + | oxidoreductase activity, acting on single donors with incorporation of molecular oxygen, incorporation of two atoms of oxygen                                        | GO:0016702 |            |               |   |      |     |        | 6.22  | 3.29E-04 | 1.89E-02 |
|   | 209 |               |         |   |                                                                                                                                                                      |            | Metabolism | Bioenergetics | F | 28   | 7   | 1.13   |       |          |          |
| 3 |     | F2-3 vs. L2-3 | F2-3 up | + | oxidoreductase activity, acting on the aldehyde or oxo group of donors                                                                                               | GO:0016903 |            |               |   |      |     |        | 5.62  | 1.12E-06 | 1.33E-04 |
|   | 210 |               |         |   |                                                                                                                                                                      |            | Metabolism | Bioenergetics | F | 62   | 14  | 2.49   |       |          |          |
| 3 |     | F2-3 vs. L2-3 | F2-3 up | + | oxidoreductase activity, acting on the aldehyde or oxo group of donors, NAD or NADP as                                                                               | GO:0016620 |            |               |   |      |     |        | 6.94  | 9.86E-07 | 1.27E-04 |
|   | 211 |               |         |   |                                                                                                                                                                      |            | Metabolism | Bioenergetics | F | 43   | 12  | 1.73   |       |          |          |
| 3 |     | F2-3 vs. L2-3 | F2-3 up | + | oxidoreductase activity, acting on the CH-NH2 group of donors                                                                                                        | GO:0016638 |            |               |   |      |     |        | 5.89  | 6.74E-05 | 4.71E-03 |
|   | 212 |               |         |   |                                                                                                                                                                      |            | Metabolism | Bioenergetics | F | 38   | 9   | 1.53   |       |          |          |
| 3 |     | F2-3 vs. L2-3 | F2-3 up | + | oxidoreductase activity, acting on the CH-OH group of donors, NAD or NADP as acceptor                                                                                | GO:0016616 |            |               |   |      |     |        | 3.28  | 4.37E-06 | 4.39E-04 |
|   | 213 |               |         |   |                                                                                                                                                                      |            | Metabolism | Bioenergetics | F | 167  | 22  | 6.71   |       |          |          |
| 3 | 214 | F2-3 vs. L2-3 | F2-3 up | + | pentose-phosphate shunt                                                                                                                                              | GO:0006098 | Metabolism | Bioenergetics | P | 33   | 7   | 1.33   | 5.28  | 7.70E-04 | 1.81E-02 |
| 3 | 215 | F2-3 vs. L2-3 | F2-3 up | + | polysaccharide biosynthetic process                                                                                                                                  | GO:0000271 | Metabolism | Bioenergetics | P | 213  | 26  | 8.56   | 3.04  | 2.21E-06 | 1.17E-04 |
| 3 | 216 | F2-3 vs. L2-3 | F2-3 up | + | polysaccharide metabolic process                                                                                                                                     | GO:0005976 | Metabolism | Bioenergetics | P | 419  | 51  | 16.84  | 3.03  | 3.78E-11 | 5.65E-09 |
| 3 | 217 | F2-3 vs. L2-3 | F2-3 up | + | primary metabolic process                                                                                                                                            | GO:0044238 | Metabolism | Bioenergetics | P | 7219 | 361 | 290.17 | 1.24  | 3.61E-06 | 1.74E-04 |
| 3 | 218 | F2-3 vs. L2-3 | F2-3 up | + | proton transmembrane transport                                                                                                                                       | GO:1902600 | Metabolism | Bioenergetics | P | 95   | 17  | 3.82   | 4.45  | 1.43E-06 | 7.98E-05 |
| 3 |     | F2-3 vs. L2-3 | F2-3 up | + | proton-exporting ATPase activity, phosphorylative mechanism                                                                                                          | GO:0008553 |            |               |   |      |     |        | 7.46  | 3.89E-04 | 2.12E-02 |
|   | 219 |               |         |   |                                                                                                                                                                      |            | Metabolism | Bioenergetics | F | 20   | 6   | 0.8    |       |          |          |
| 3 |     | F2-3 vs. L2-3 | F2-3 up | + | proton-transporting ATPase activity, rotational mechanism                                                                                                            | GO:0046961 |            |               |   |      |     |        | 7.96  | 2.84E-05 | 2.40E-03 |
|   | 220 |               |         |   |                                                                                                                                                                      |            | Metabolism | Bioenergetics | F | 25   | 8   | 1      |       |          |          |
| 3 | 221 | F2-3 vs. L2-3 | F2-3 up | + | proton-transporting two-sector ATPase complex                                                                                                                        | GO:0016469 | Metabolism | Bioenergetics | C | 65   | 11  | 2.61   | 4.21  | 1.57E-04 | 3.40E-03 |
| 3 |     | F2-3 vs. L2-3 | F2-3 up | + | proton-transporting two-sector ATPase complex, proton-transporting domain                                                                                            | GO:0033177 |            |               |   |      |     |        | 5.33  | 1.75E-03 | 2.84E-02 |
|   | 222 |               |         |   |                                                                                                                                                                      |            | Metabolism | Bioenergetics | C | 28   | 6   | 1.13   |       |          |          |
| 3 | 223 | F2-3 vs. L2-3 | F2-3 up | + | proton-transporting V-type ATPase complex                                                                                                                            | GO:0033176 | Metabolism | Bioenergetics | C | 23   | 6   | 0.92   | 6.49  | 7.27E-04 | 1.35E-02 |

|   |     |               |         |   |                                                                               |            |             |               |   |       |     |        |       |          |          |          |
|---|-----|---------------|---------|---|-------------------------------------------------------------------------------|------------|-------------|---------------|---|-------|-----|--------|-------|----------|----------|----------|
| 3 |     | F2-3 vs. L2-3 | F2-3 up | + | pyrophosphate hydrolysis-driven proton transmembrane transporter activity     | GO:0009678 |             |               |   |       |     |        |       | 7.35     | 2.01E-07 | 2.94E-05 |
|   | 224 |               |         |   |                                                                               |            | Metabolism  | Bioenergetics | F | 44    | 13  | 1.77   |       |          |          |          |
| 3 | 225 | F2-3 vs. L2-3 | F2-3 up | + | pyruvate metabolic process                                                    | GO:0006090 | Metabolism  | Bioenergetics | P | 79    | 10  | 3.18   | 3.15  | 2.29E-03 | 4.07E-02 |          |
| 3 | 226 | F2-3 vs. L2-3 | F2-3 up | + | reductive pentose-phosphate cycle                                             | GO:0019253 | Metabolism  | Bioenergetics | P | 14    | 8   | 0.56   | 14.22 | 9.56E-07 | 5.83E-05 |          |
| 3 | 227 | F2-3 vs. L2-3 | F2-3 up | + | tricarboxylic acid cycle                                                      | GO:0006099 | Metabolism  | Bioenergetics | P | 46    | 8   | 1.85   | 4.33  | 1.04E-03 | 2.30E-02 |          |
| 3 | 228 | F2-3 vs. L2-3 | F2-3 up | + | unsaturated fatty acid biosynthetic process                                   | GO:0006636 | Metabolism  | Bioenergetics | P | 24    | 6   | 0.96   | 6.22  | 8.79E-04 | 1.99E-02 |          |
| 3 | 229 | F2-3 vs. L2-3 | F2-3 up | + | unsaturated fatty acid metabolic process                                      | GO:0033559 | Metabolism  | Bioenergetics | P | 25    | 6   | 1      | 5.97  | 1.05E-03 | 2.30E-02 |          |
| 3 |     | F2-3 vs. L2-3 | F2-3 up | - | modification-dependent macromolecule catabolic process                        | GO:0043632 | Metabolism  | Catabolism    | P | 536   | 7   | 21.54  | 0.32  | 6.47E-04 | 1.53E-02 |          |
| 3 | 231 | F2-3 vs. L2-3 | F2-3 up | - | modification-dependent protein catabolic                                      | GO:0019941 | Metabolism  | Catabolism    | P | 524   | 7   | 21.06  | 0.33  | 8.65E-04 | 1.97E-02 |          |
| 3 | 232 | F2-3 vs. L2-3 | F2-3 up | - | protein-containing complex                                                    | GO:0032991 | Metabolism  | Catabolism    | C | 2958  | 79  | 118.9  | 0.66  | 7.97E-05 | 1.80E-03 |          |
| 3 | 233 | F2-3 vs. L2-3 | F2-3 up | - | ubiquitin-dependent protein catabolic process                                 | GO:0006511 | Metabolism  | Catabolism    | P | 512   | 6   | 20.58  | 0.29  | 3.24E-04 | 8.68E-03 |          |
| 3 | 234 | F2-3 vs. L2-3 | F2-3 up | + | alpha-amino acid catabolic process                                            | GO:1901606 | Metabolism  | Catabolism    | P | 88    | 15  | 3.54   | 4.24  | 9.85E-06 | 4.12E-04 |          |
| 3 | 235 | F2-3 vs. L2-3 | F2-3 up | + | aromatic amino acid family catabolic process                                  | GO:0009074 | Metabolism  | Catabolism    | P | 21    | 5   | 0.84   | 5.92  | 2.85E-03 | 4.87E-02 |          |
| 3 | 236 | F2-3 vs. L2-3 | F2-3 up | + | carboxylic acid catabolic process                                             | GO:0046395 | Metabolism  | Catabolism    | P | 162   | 23  | 6.51   | 3.53  | 8.46E-07 | 5.27E-05 |          |
| 3 | 237 | F2-3 vs. L2-3 | F2-3 up | + | catabolic process                                                             | GO:0009056 | Metabolism  | Catabolism    | P | 1469  | 95  | 59.05  | 1.61  | 1.39E-05 | 5.53E-04 |          |
| 3 | 238 | F2-3 vs. L2-3 | F2-3 up | + | cellular amino acid catabolic process                                         | GO:0009063 | Metabolism  | Catabolism    | P | 97    | 15  | 3.9    | 3.85  | 2.74E-05 | 1.02E-03 |          |
| 3 | 239 | F2-3 vs. L2-3 | F2-3 up | + | cellular catabolic process                                                    | GO:0044248 | Metabolism  | Catabolism    | P | 1223  | 72  | 49.16  | 1.46  | 1.90E-03 | 3.45E-02 |          |
| 3 | 240 | F2-3 vs. L2-3 | F2-3 up | + | dicarboxylic acid catabolic process                                           | GO:0043649 | Metabolism  | Catabolism    | P | 14    | 5   | 0.56   | 8.89  | 6.31E-04 | 1.50E-02 |          |
| 3 |     | F2-3 vs. L2-3 | F2-3 up | + | erythrose 4-phosphate/phosphoenolpyruvate family amino acid catabolic process | GO:1902222 | Metabolism  | Catabolism    | P | 12    | 4   | 0.48   | 8.29  | 2.78E-03 | 4.83E-02 |          |
| 3 | 242 | F2-3 vs. L2-3 | F2-3 up | + | leaf senescence                                                               | GO:0010150 | Metabolism  | Catabolism    | P | 106   | 12  | 4.26   | 2.82  | 2.07E-03 | 3.72E-02 |          |
| 3 | 243 | F2-3 vs. L2-3 | F2-3 up | + | L-phenylalanine catabolic process                                             | GO:0006559 | Metabolism  | Catabolism    | P | 12    | 4   | 0.48   | 8.29  | 2.78E-03 | 4.85E-02 |          |
| 3 | 244 | F2-3 vs. L2-3 | F2-3 up | + | monocarboxylic acid catabolic process                                         | GO:0072329 | Metabolism  | Catabolism    | P | 62    | 10  | 2.49   | 4.01  | 4.34E-04 | 1.12E-02 |          |
| 3 | 245 | F2-3 vs. L2-3 | F2-3 up | + | organic acid catabolic process                                                | GO:0016054 | Metabolism  | Catabolism    | P | 162   | 23  | 6.51   | 3.53  | 8.46E-07 | 5.33E-05 |          |
| 3 | 246 | F2-3 vs. L2-3 | F2-3 up | + | organic hydroxy compound catabolic process                                    | GO:1901616 | Metabolism  | Catabolism    | P | 44    | 8   | 1.77   | 4.52  | 8.05E-04 | 1.87E-02 |          |
| 3 | 247 | F2-3 vs. L2-3 | F2-3 up | + | organic substance catabolic process                                           | GO:1901575 | Metabolism  | Catabolism    | P | 1345  | 86  | 54.06  | 1.59  | 5.46E-05 | 1.86E-03 |          |
| 3 | 248 | F2-3 vs. L2-3 | F2-3 up | + | pectin catabolic process                                                      | GO:0045490 | Metabolism  | Catabolism    | P | 99    | 13  | 3.98   | 3.27  | 3.93E-04 | 1.02E-02 |          |
| 3 | 249 | F2-3 vs. L2-3 | F2-3 up | + | peroxidase activity                                                           | GO:0004601 | Metabolism  | Catabolism    | F | 111   | 13  | 4.46   | 2.91  | 1.04E-03 | 4.64E-02 |          |
| 3 | 250 | F2-3 vs. L2-3 | F2-3 up | + | peroxisome                                                                    | GO:0005777 | Metabolism  | Catabolism    | C | 320   | 31  | 12.86  | 2.41  | 1.97E-05 | 5.00E-04 |          |
| 3 | 251 | F2-3 vs. L2-3 | F2-3 up | + | phenol-containing compound catabolic process                                  | GO:0019336 | Metabolism  | Catabolism    | P | 7     | 4   | 0.28   | 14.22 | 5.88E-04 | 1.42E-02 |          |
| 3 | 252 | F2-3 vs. L2-3 | F2-3 up | + | plant organ senescence                                                        | GO:0090693 | Metabolism  | Catabolism    | P | 112   | 13  | 4.5    | 2.89  | 1.12E-03 | 2.41E-02 |          |
| 3 | 253 | F2-3 vs. L2-3 | F2-3 up | + | polysaccharide catabolic process                                              | GO:0000272 | Metabolism  | Catabolism    | P | 144   | 17  | 5.79   | 2.94  | 1.74E-04 | 5.16E-03 |          |
| 3 | 254 | F2-3 vs. L2-3 | F2-3 up | + | small molecule catabolic process                                              | GO:0044282 | Metabolism  | Catabolism    | P | 239   | 29  | 9.61   | 3.02  | 6.54E-07 | 4.44E-05 |          |
| 3 | 255 | F2-3 vs. L2-3 | F2-3 up | - | nucleic acid metabolic process                                                | GO:0090304 | Development | Cell division | P | 1705  | 26  | 68.53  | 0.38  | 5.10E-09 | 4.56E-07 |          |
| 3 | 256 | F2-3 vs. L2-3 | F2-3 up | - | RNA metabolic process                                                         | GO:0016070 | Development | Cell division | P | 1294  | 21  | 52.01  | 0.4   | 1.60E-06 | 8.69E-05 |          |
| 3 | 257 | F2-3 vs. L2-3 | F2-3 up | + | cytoskeleton-dependent cytokinesis                                            | GO:0061640 | Development | Cell division | P | 55    | 10  | 2.21   | 4.52  | 1.85E-04 | 5.42E-03 |          |
| 3 | 258 | F2-3 vs. L2-3 | F2-3 up | + | gametophyte development                                                       | GO:0048229 | Development | Cell division | P | 461   | 34  | 18.53  | 1.83  | 1.32E-03 | 2.66E-02 |          |
| 3 | 259 | F2-3 vs. L2-3 | F2-3 up | + | mitotic cytokinesis                                                           | GO:0000281 | Development | Cell division | P | 40    | 8   | 1.61   | 4.98  | 4.62E-04 | 1.17E-02 |          |
| 3 |     | F2-3 vs. L2-3 | F2-3 up | + | nucleobase-containing small molecule metabolic process                        | GO:0055086 | Development | Cell division | P | 392   | 40  | 15.76  | 2.54  | 4.04E-07 | 2.95E-05 |          |
| 3 | 261 | F2-3 vs. L2-3 | F2-3 up | + | nucleoside phosphate binding                                                  | GO:1901265 | Development | Cell division | F | 1112  | 73  | 44.7   | 1.63  | 1.06E-04 | 6.69E-03 |          |
| 3 | 262 | F2-3 vs. L2-3 | F2-3 up | + | nucleotide binding                                                            | GO:0000166 | Development | Cell division | F | 1112  | 73  | 44.7   | 1.63  | 1.06E-04 | 6.83E-03 |          |
| 3 | 263 | F2-3 vs. L2-3 | F2-3 up | + | nucleotide-sugar biosynthetic process                                         | GO:0009226 | Development | Cell division | P | 42    | 11  | 1.69   | 6.52  | 4.69E-06 | 2.21E-04 |          |
| 3 | 264 | F2-3 vs. L2-3 | F2-3 up | + | nucleotide-sugar metabolic process                                            | GO:0009225 | Development | Cell division | P | 52    | 12  | 2.09   | 5.74  | 5.36E-06 | 2.43E-04 |          |
| 3 | 265 | F2-3 vs. L2-3 | F2-3 up | + | pollen germination                                                            | GO:0009846 | Development | Cell division | P | 63    | 10  | 2.53   | 3.95  | 4.86E-04 | 1.20E-02 |          |
| 3 | 266 | F2-3 vs. L2-3 | F2-3 up | + | pollen tube development                                                       | GO:0048868 | Development | Cell division | P | 192   | 26  | 7.72   | 3.37  | 3.79E-07 | 2.80E-05 |          |
| 3 | 267 | F2-3 vs. L2-3 | F2-3 up | + | pollen tube growth                                                            | GO:0009860 | Development | Cell division | P | 135   | 21  | 5.43   | 3.87  | 6.75E-07 | 4.49E-05 |          |
| 3 | 268 | F2-3 vs. L2-3 | F2-3 up | + | pollination                                                                   | GO:0009856 | Development | Cell division | P | 287   | 30  | 11.54  | 2.6   | 1.02E-05 | 4.17E-04 |          |
| 3 | 269 | F2-3 vs. L2-3 | F2-3 up | + | reproduction                                                                  | GO:0000003 | Development | Cell division | P | 1742  | 111 | 70.02  | 1.59  | 4.71E-06 | 2.18E-04 |          |
| 3 | 270 | F2-3 vs. L2-3 | F2-3 up | + | reproductive process                                                          | GO:0022414 | Development | Cell division | P | 1732  | 111 | 69.62  | 1.59  | 3.31E-06 | 1.62E-04 |          |
| 3 | 271 | F2-3 vs. L2-3 | F2-3 up | + | syncytium formation                                                           | GO:0006949 | Development | Cell division | P | 16    | 5   | 0.64   | 7.77  | 1.04E-03 | 2.30E-02 |          |
| 3 | 272 | F2-3 vs. L2-3 | F2-3 up | - | chromosome organization                                                       | GO:0051276 | Development | Development   | P | 501   | 6   | 20.14  | 0.3   | 4.41E-04 | 1.13E-02 |          |
| 3 | 273 | F2-3 vs. L2-3 | F2-3 up | - | nuclear lumen                                                                 | GO:0031981 | Development | Development   | C | 1222  | 28  | 49.12  | 0.57  | 1.55E-03 | 2.60E-02 |          |
| 3 | 274 | F2-3 vs. L2-3 | F2-3 up | - | nucleoplasm                                                                   | GO:0005654 | Development | Development   | C | 466   | 5   | 18.73  | 0.27  | 4.04E-04 | 8.58E-03 |          |
| 3 | 275 | F2-3 vs. L2-3 | F2-3 up | - | nucleus                                                                       | GO:0005634 | Development | Development   | C | 10540 | 321 | 423.66 | 0.76  | 2.25E-10 | 9.78E-09 |          |
| 3 | 276 | F2-3 vs. L2-3 | F2-3 up | + | actin cytoskeleton                                                            | GO:0015629 | Development | Development   | C | 63    | 9   | 2.53   | 3.55  | 1.78E-03 | 2.85E-02 |          |
| 3 | 277 | F2-3 vs. L2-3 | F2-3 up | + | actin cytoskeleton organization                                               | GO:0030036 | Development | Development   | P | 104   | 12  | 4.18   | 2.87  | 1.79E-03 | 3.35E-02 |          |
| 3 | 278 | F2-3 vs. L2-3 | F2-3 up | + | anatomical structure development                                              | GO:0048856 | Development | Development   | P | 2842  | 183 | 114.24 | 1.6   | 6.56E-10 | 7.14E-08 |          |
| 3 |     | F2-3 vs. L2-3 | F2-3 up | + | anatomical structure formation involved in morphogenesis                      | GO:0048646 | Development | Development   | P | 204   | 19  | 8.2    | 2.32  | 1.27E-03 | 2.60E-02 |          |
| 3 | 280 | F2-3 vs. L2-3 | F2-3 up | + | anatomical structure morphogenesis                                            | GO:0009653 | Development | Development   | P | 896   | 70  | 36.02  | 1.94  | 5.95E-07 | 4.13E-05 |          |



|   |     |               |         |   |                                                 |            |             |             |   |       |      |        |       |          |          |
|---|-----|---------------|---------|---|-------------------------------------------------|------------|-------------|-------------|---|-------|------|--------|-------|----------|----------|
| 3 | 281 | F2-3 vs. L2-3 | F2-3 up | + | anther dehiscence                               | GO:0009901 | Development | Development | P | 21    | 5    | 0.84   | 5.92  | 2.85E-03 | 4.86E-02 |
| 3 | 282 | F2-3 vs. L2-3 | F2-3 up | + | apoplast                                        | GO:0048046 | Development | Development | C | 297   | 61   | 11.94  | 5.11  | 1.21E-22 | 4.21E-20 |
| 3 | 283 | F2-3 vs. L2-3 | F2-3 up | + | bounding membrane of organelle                  | GO:0098588 | Development | Development | C | 923   | 64   | 37.1   | 1.73  | 6.74E-05 | 1.56E-03 |
| 3 | 284 | F2-3 vs. L2-3 | F2-3 up | + | cell development                                | GO:0048468 | Development | Development | P | 319   | 30   | 12.82  | 2.34  | 5.71E-05 | 1.92E-03 |
| 3 | 285 | F2-3 vs. L2-3 | F2-3 up | + | cell differentiation                            | GO:0030154 | Development | Development | P | 613   | 46   | 24.64  | 1.87  | 1.29E-04 | 4.05E-03 |
| 3 | 286 | F2-3 vs. L2-3 | F2-3 up | + | cell growth                                     | GO:0016049 | Development | Development | P | 386   | 44   | 15.52  | 2.84  | 5.12E-09 | 4.50E-07 |
| 3 | 287 | F2-3 vs. L2-3 | F2-3 up | + | cell junction                                   | GO:0030054 | Development | Development | C | 944   | 61   | 37.94  | 1.61  | 5.85E-04 | 1.11E-02 |
| 3 | 288 | F2-3 vs. L2-3 | F2-3 up | + | cell morphogenesis                              | GO:0000902 | Development | Development | P | 369   | 37   | 14.83  | 2.49  | 1.56E-06 | 8.57E-05 |
| 3 | 289 | F2-3 vs. L2-3 | F2-3 up | + | cell morphogenesis involved in differentiation  | GO:0000904 | Development | Development | P | 229   | 24   | 9.2    | 2.61  | 5.20E-05 | 1.78E-03 |
| 3 | 290 | F2-3 vs. L2-3 | F2-3 up | + | cell periphery                                  | GO:0071944 | Development | Development | C | 4012  | 271  | 161.26 | 1.68  | 2.59E-17 | 2.45E-15 |
| 3 | 291 | F2-3 vs. L2-3 | F2-3 up | + | cell projection                                 | GO:0042995 | Development | Development | C | 115   | 18   | 4.62   | 3.89  | 3.85E-06 | 1.25E-04 |
| 3 | 292 | F2-3 vs. L2-3 | F2-3 up | + | cell tip growth                                 | GO:0009932 | Development | Development | P | 160   | 22   | 6.43   | 3.42  | 2.34E-06 | 1.23E-04 |
| 3 | 293 | F2-3 vs. L2-3 | F2-3 up | + | cell wall                                       | GO:0005618 | Development | Development | C | 565   | 52   | 22.71  | 2.29  | 2.08E-07 | 7.72E-06 |
| 3 | 294 | F2-3 vs. L2-3 | F2-3 up | + | cell wall biogenesis                            | GO:0042546 | Development | Development | P | 238   | 22   | 9.57   | 2.3   | 5.58E-04 | 1.36E-02 |
| 3 | 295 | F2-3 vs. L2-3 | F2-3 up | + | cell wall modification                          | GO:0042545 | Development | Development | P | 173   | 24   | 6.95   | 3.45  | 7.15E-07 | 4.70E-05 |
| 3 | 296 | F2-3 vs. L2-3 | F2-3 up | + | cell wall organization                          | GO:0071555 | Development | Development | P | 274   | 39   | 11.01  | 3.54  | 1.38E-10 | 1.72E-08 |
| 3 | 297 | F2-3 vs. L2-3 | F2-3 up | + | cell wall organization or biogenesis            | GO:0071554 | Development | Development | P | 507   | 57   | 20.38  | 2.8   | 4.52E-11 | 6.60E-09 |
| 3 | 298 | F2-3 vs. L2-3 | F2-3 up | + | cell wall pectin metabolic process              | GO:0052546 | Development | Development | P | 27    | 6    | 1.09   | 5.53  | 1.49E-03 | 2.90E-02 |
| 3 | 299 | F2-3 vs. L2-3 | F2-3 up | + | cell-cell junction                              | GO:0005911 | Development | Development | C | 944   | 61   | 37.94  | 1.61  | 5.85E-04 | 1.17E-02 |
| 3 | 300 | F2-3 vs. L2-3 | F2-3 up | + | cellular anatomical entity                      | GO:0110165 | Development | Development | C | 24430 | 1024 | 981.98 | 1.04  | 2.94E-05 | 7.13E-04 |
| 3 | 301 | F2-3 vs. L2-3 | F2-3 up | + | cellular developmental process                  | GO:0048869 | Development | Development | P | 695   | 49   | 27.94  | 1.75  | 3.20E-04 | 8.62E-03 |
| 3 | 302 | F2-3 vs. L2-3 | F2-3 up | + | cellular process                                | GO:0009987 | Development | Development | P | 12008 | 683  | 482.67 | 1.42  | 1.84E-32 | 1.10E-28 |
| 3 | 303 | F2-3 vs. L2-3 | F2-3 up | + | circulatory system process                      | GO:0003013 | Development | Development | P | 21    | 6    | 0.84   | 7.11  | 4.84E-04 | 1.21E-02 |
| 3 | 304 | F2-3 vs. L2-3 | F2-3 up | + | cytoplasm                                       | GO:0005737 | Development | Development | C | 14837 | 773  | 596.38 | 1.3   | 1.94E-26 | 2.02E-23 |
| 3 | 305 | F2-3 vs. L2-3 | F2-3 up | + | cytosol                                         | GO:0005829 | Development | Development | C | 3241  | 235  | 130.27 | 1.8   | 3.48E-18 | 4.03E-16 |
| 3 | 306 | F2-3 vs. L2-3 | F2-3 up | + | developmental cell growth                       | GO:0048588 | Development | Development | P | 197   | 26   | 7.92   | 3.28  | 5.90E-07 | 4.20E-05 |
| 3 | 307 | F2-3 vs. L2-3 | F2-3 up | + | developmental growth                            | GO:0048589 | Development | Development | P | 385   | 46   | 15.48  | 2.97  | 5.93E-10 | 6.69E-08 |
| 3 | 308 | F2-3 vs. L2-3 | F2-3 up | + | developmental growth involved in                | GO:0060560 | Development | Development | P | 335   | 40   | 13.47  | 2.97  | 7.92E-09 | 6.67E-07 |
| 3 | 309 | F2-3 vs. L2-3 | F2-3 up | + | developmental process                           | GO:0032502 | Development | Development | P | 2997  | 194  | 120.47 | 1.61  | 9.81E-11 | 1.30E-08 |
| 3 | 310 | F2-3 vs. L2-3 | F2-3 up | + | developmental process involved in reproduction  | GO:0003006 | Development | Development | P | 1437  | 98   | 57.76  | 1.7   | 1.11E-06 | 6.52E-05 |
| 3 | 311 | F2-3 vs. L2-3 | F2-3 up | + | endomembrane system                             | GO:0012505 | Development | Development | C | 2286  | 138  | 91.89  | 1.5   | 4.36E-06 | 1.38E-04 |
| 3 | 312 | F2-3 vs. L2-3 | F2-3 up | + | envelope                                        | GO:0031975 | Development | Development | C | 1025  | 97   | 41.2   | 2.35  | 1.59E-13 | 7.89E-12 |
| 3 | 313 | F2-3 vs. L2-3 | F2-3 up | + | external encapsulating structure                | GO:0030312 | Development | Development | C | 567   | 54   | 22.79  | 2.37  | 3.58E-08 | 1.38E-06 |
| 3 | 314 | F2-3 vs. L2-3 | F2-3 up | + | external encapsulating structure organization   | GO:0045229 | Development | Development | P | 320   | 43   | 12.86  | 3.34  | 8.18E-11 | 1.11E-08 |
| 3 | 315 | F2-3 vs. L2-3 | F2-3 up | + | extracellular region                            | GO:0005576 | Development | Development | C | 3128  | 190  | 125.73 | 1.51  | 2.33E-08 | 9.69E-07 |
| 3 | 316 | F2-3 vs. L2-3 | F2-3 up | + | floral organ development                        | GO:0048437 | Development | Development | P | 245   | 24   | 9.85   | 2.44  | 1.59E-04 | 4.80E-03 |
| 3 | 317 | F2-3 vs. L2-3 | F2-3 up | + | flower development                              | GO:0009908 | Development | Development | P | 356   | 32   | 14.31  | 2.24  | 8.22E-05 | 2.64E-03 |
| 3 | 318 | F2-3 vs. L2-3 | F2-3 up | + | Golgi apparatus subcompartment                  | GO:0098791 | Development | Development | C | 437   | 37   | 17.57  | 2.11  | 5.60E-05 | 1.33E-03 |
| 3 | 319 | F2-3 vs. L2-3 | F2-3 up | + | Golgi cisterna                                  | GO:0031985 | Development | Development | C | 185   | 17   | 7.44   | 2.29  | 2.62E-03 | 4.06E-02 |
| 3 | 320 | F2-3 vs. L2-3 | F2-3 up | + | Golgi trans cisterna                            | GO:0000138 | Development | Development | C | 85    | 11   | 3.42   | 3.22  | 1.20E-03 | 2.11E-02 |
| 3 | 321 | F2-3 vs. L2-3 | F2-3 up | + | growth                                          | GO:0040007 | Development | Development | P | 443   | 51   | 17.81  | 2.86  | 2.26E-10 | 2.71E-08 |
| 3 | 322 | F2-3 vs. L2-3 | F2-3 up | + | intracellular vesicle                           | GO:0097708 | Development | Development | C | 722   | 56   | 29.02  | 1.93  | 1.10E-05 | 3.09E-04 |
| 3 | 323 | F2-3 vs. L2-3 | F2-3 up | + | membrane                                        | GO:0016020 | Development | Development | C | 5493  | 363  | 220.79 | 1.64  | 8.49E-23 | 4.42E-20 |
| 3 | 324 | F2-3 vs. L2-3 | F2-3 up | + | microbody                                       | GO:0042579 | Development | Development | C | 320   | 31   | 12.86  | 2.41  | 1.97E-05 | 5.13E-04 |
| 3 | 325 | F2-3 vs. L2-3 | F2-3 up | + | multicellular organism development              | GO:0007275 | Development | Development | P | 2457  | 147  | 98.76  | 1.49  | 3.15E-06 | 1.56E-04 |
| 3 | 326 | F2-3 vs. L2-3 | F2-3 up | + | multi-multicellular organism process            | GO:0044706 | Development | Development | P | 287   | 30   | 11.54  | 2.6   | 1.02E-05 | 4.20E-04 |
| 3 | 327 | F2-3 vs. L2-3 | F2-3 up | + | organelle envelope                              | GO:0031967 | Development | Development | C | 1025  | 97   | 41.2   | 2.35  | 1.59E-13 | 7.53E-12 |
| 3 | 328 | F2-3 vs. L2-3 | F2-3 up | + | organelle envelope lumen                        | GO:0031970 | Development | Development | C | 16    | 5    | 0.64   | 7.77  | 1.04E-03 | 1.86E-02 |
| 3 | 329 | F2-3 vs. L2-3 | F2-3 up | + | organelle membrane                              | GO:0031090 | Development | Development | C | 1458  | 93   | 58.61  | 1.59  | 2.48E-05 | 6.14E-04 |
| 3 | 330 | F2-3 vs. L2-3 | F2-3 up | + | organelle subcompartment                        | GO:0031984 | Development | Development | C | 1156  | 114  | 46.47  | 2.45  | 6.08E-17 | 4.87E-15 |
| 3 | 331 | F2-3 vs. L2-3 | F2-3 up | + | phloem loading                                  | GO:0110126 | Development | Development | P | 7     | 4    | 0.28   | 14.22 | 5.88E-04 | 1.42E-02 |
| 3 | 332 | F2-3 vs. L2-3 | F2-3 up | + | phyllome development                            | GO:0048827 | Development | Development | P | 495   | 40   | 19.9   | 2.01  | 9.09E-05 | 2.91E-03 |
| 3 | 333 | F2-3 vs. L2-3 | F2-3 up | + | plant organ development                         | GO:0099402 | Development | Development | P | 1009  | 69   | 40.56  | 1.7   | 4.89E-05 | 1.70E-03 |
| 3 | 334 | F2-3 vs. L2-3 | F2-3 up | + | plant-type cell wall                            | GO:0009505 | Development | Development | C | 233   | 21   | 9.37   | 2.24  | 1.42E-03 | 2.42E-02 |
| 3 | 335 | F2-3 vs. L2-3 | F2-3 up | + | plant-type cell wall biogenesis                 | GO:0009832 | Development | Development | P | 157   | 17   | 6.31   | 2.69  | 4.37E-04 | 1.12E-02 |
| 3 | 336 | F2-3 vs. L2-3 | F2-3 up | + | plant-type cell wall loosening                  | GO:0009828 | Development | Development | P | 37    | 7    | 1.49   | 4.71  | 1.38E-03 | 2.74E-02 |
| 3 | 337 | F2-3 vs. L2-3 | F2-3 up | + | plant-type cell wall modification               | GO:0009827 | Development | Development | P | 64    | 11   | 2.57   | 4.28  | 1.39E-04 | 4.28E-03 |
| 3 | 338 | F2-3 vs. L2-3 | F2-3 up | + | plant-type cell wall organization               | GO:0009664 | Development | Development | P | 150   | 22   | 6.03   | 3.65  | 8.97E-07 | 5.53E-05 |
| 3 | 339 | F2-3 vs. L2-3 | F2-3 up | + | plant-type cell wall organization or biogenesis | GO:0071669 | Development | Development | P | 265   | 31   | 10.65  | 2.91  | 5.58E-07 | 4.02E-05 |
| 3 | 340 | F2-3 vs. L2-3 | F2-3 up | + | plant-type primary cell wall biogenesis         | GO:0009833 | Development | Development | P | 28    | 8    | 1.13   | 7.11  | 5.59E-05 | 1.89E-03 |
| 3 | 341 | F2-3 vs. L2-3 | F2-3 up | + | plasma membrane                                 | GO:0005886 | Development | Development | C | 3534  | 226  | 142.05 | 1.59  | 5.23E-12 | 2.37E-10 |
| 3 | 342 | F2-3 vs. L2-3 | F2-3 up | + | plasma membrane bounded cell projection         | GO:0120025 | Development | Development | C | 101   | 18   | 4.06   | 4.43  | 7.44E-07 | 2.58E-05 |

|   |     |               |         |   |                                                                               |            |             |             |   |       |     |        |       |          |          |
|---|-----|---------------|---------|---|-------------------------------------------------------------------------------|------------|-------------|-------------|---|-------|-----|--------|-------|----------|----------|
| 3 | 343 | F2-3 vs. L2-3 | F2-3 up | + | pollen development                                                            | GO:0009555 | Development | Development | P | 346   | 30  | 13.91  | 2.16  | 2.05E-04 | 5.82E-03 |
| 3 | 344 | F2-3 vs. L2-3 | F2-3 up | + | pollen tube                                                                   | GO:0090406 | Development | Development | C | 83    | 17  | 3.34   | 5.1   | 2.73E-07 | 9.81E-06 |
| 3 | 345 | F2-3 vs. L2-3 | F2-3 up | + | post-embryonic development                                                    | GO:0009791 | Development | Development | P | 1482  | 86  | 59.57  | 1.44  | 1.17E-03 | 2.47E-02 |
| 3 | 346 | F2-3 vs. L2-3 | F2-3 up | + | reproductive shoot system development                                         | GO:0090567 | Development | Development | P | 371   | 33  | 14.91  | 2.21  | 6.59E-05 | 2.17E-03 |
| 3 | 347 | F2-3 vs. L2-3 | F2-3 up | + | reproductive structure development                                            | GO:0048608 | Development | Development | P | 1206  | 73  | 48.48  | 1.51  | 1.03E-03 | 2.30E-02 |
| 3 | 348 | F2-3 vs. L2-3 | F2-3 up | + | reproductive system development                                               | GO:0061458 | Development | Development | P | 1208  | 73  | 48.56  | 1.5   | 1.04E-03 | 2.29E-02 |
| 3 | 349 | F2-3 vs. L2-3 | F2-3 up | + | shoot system development                                                      | GO:0048367 | Development | Development | P | 728   | 57  | 29.26  | 1.95  | 5.31E-06 | 2.42E-04 |
| 3 | 350 | F2-3 vs. L2-3 | F2-3 up | + | stromule                                                                      | GO:0010319 | Development | Development | C | 36    | 13  | 1.45   | 8.98  | 2.87E-08 | 1.15E-06 |
| 3 | 351 | F2-3 vs. L2-3 | F2-3 up | + | symplast                                                                      | GO:0055044 | Development | Development | C | 944   | 61  | 37.94  | 1.61  | 5.85E-04 | 1.15E-02 |
| 3 | 352 | F2-3 vs. L2-3 | F2-3 up | + | system development                                                            | GO:0048731 | Development | Development | P | 1867  | 114 | 75.05  | 1.52  | 2.13E-05 | 8.28E-04 |
| 3 | 353 | F2-3 vs. L2-3 | F2-3 up | + | system process                                                                | GO:0003008 | Development | Development | P | 21    | 6   | 0.84   | 7.11  | 4.84E-04 | 1.20E-02 |
| 3 | 354 | F2-3 vs. L2-3 | F2-3 up | + | unidimensional cell growth                                                    | GO:0009826 | Development | Development | P | 288   | 35  | 11.58  | 3.02  | 4.55E-08 | 3.63E-06 |
| 3 | 355 | F2-3 vs. L2-3 | F2-3 up | + | vacuolar membrane                                                             | GO:0005774 | Development | Development | C | 570   | 48  | 22.91  | 2.1   | 6.39E-06 | 1.90E-04 |
| 3 | 356 | F2-3 vs. L2-3 | F2-3 up | + | vacuole                                                                       | GO:0005773 | Development | Development | C | 1083  | 102 | 43.53  | 2.34  | 3.61E-14 | 1.88E-12 |
| 3 | 357 | F2-3 vs. L2-3 | F2-3 up | + | vascular process in circulatory system                                        | GO:0003018 | Development | Development | P | 21    | 6   | 0.84   | 7.11  | 4.84E-04 | 1.21E-02 |
| 3 | 358 | F2-3 vs. L2-3 | F2-3 up | - | DNA metabolic process                                                         | GO:0006259 | Metabolism  | Metabolism  | P | 448   | 5   | 18.01  | 0.28  | 7.73E-04 | 1.81E-02 |
| 3 | 359 | F2-3 vs. L2-3 | F2-3 up | + | actin binding                                                                 | GO:0003779 | Metabolism  | Metabolism  | F | 114   | 14  | 4.58   | 3.06  | 4.42E-04 | 2.37E-02 |
| 3 | 360 | F2-3 vs. L2-3 | F2-3 up | + | actin filament-based process                                                  | GO:0030029 | Metabolism  | Metabolism  | P | 113   | 13  | 4.54   | 2.86  | 1.21E-03 | 2.51E-02 |
| 3 | 361 | F2-3 vs. L2-3 | F2-3 up | + | actin monomer binding                                                         | GO:0003785 | Metabolism  | Metabolism  | F | 7     | 4   | 0.28   | 14.22 | 5.88E-04 | 3.00E-02 |
| 3 | 362 | F2-3 vs. L2-3 | F2-3 up | + | alpha-amino acid biosynthetic process                                         | GO:1901607 | Metabolism  | Metabolism  | P | 181   | 18  | 7.28   | 2.47  | 1.14E-03 | 2.42E-02 |
| 3 | 363 | F2-3 vs. L2-3 | F2-3 up | + | alpha-amino acid metabolic process                                            | GO:1901605 | Metabolism  | Metabolism  | P | 278   | 36  | 11.17  | 3.22  | 6.71E-09 | 5.73E-07 |
| 3 | 364 | F2-3 vs. L2-3 | F2-3 up | + | aminoglycan biosynthetic process                                              | GO:0006023 | Metabolism  | Metabolism  | P | 4     | 3   | 0.16   | 18.66 | 1.79E-03 | 3.29E-02 |
| 3 | 365 | F2-3 vs. L2-3 | F2-3 up | + | anchoring junction                                                            | GO:0070161 | Metabolism  | Metabolism  | C | 944   | 61  | 37.94  | 1.61  | 5.85E-04 | 1.13E-02 |
| 3 | 366 | F2-3 vs. L2-3 | F2-3 up | + | anion binding                                                                 | GO:0043168 | Metabolism  | Metabolism  | F | 1369  | 85  | 55.03  | 1.54  | 1.51E-04 | 8.99E-03 |
| 3 | 367 | F2-3 vs. L2-3 | F2-3 up | + | aromatic compound biosynthetic process                                        | GO:0019438 | Metabolism  | Metabolism  | P | 808   | 60  | 32.48  | 1.85  | 1.47E-05 | 5.82E-04 |
| 3 | 368 | F2-3 vs. L2-3 | F2-3 up | + | beta-glucan biosynthetic process                                              | GO:0051274 | Metabolism  | Metabolism  | P | 62    | 11  | 2.49   | 4.41  | 1.08E-04 | 3.42E-03 |
| 3 | 369 | F2-3 vs. L2-3 | F2-3 up | + | beta-glucan metabolic process                                                 | GO:0051273 | Metabolism  | Metabolism  | P | 67    | 11  | 2.69   | 4.08  | 1.98E-04 | 5.65E-03 |
| 3 | 370 | F2-3 vs. L2-3 | F2-3 up | + | binding                                                                       | GO:0005488 | Metabolism  | Metabolism  | F | 9843  | 468 | 395.64 | 1.18  | 1.15E-05 | 1.12E-03 |
| 3 | 371 | F2-3 vs. L2-3 | F2-3 up | + | biological_process                                                            | GO:0008150 | Metabolism  | Metabolism  | P | 21988 | 948 | 883.82 | 1.07  | 8.28E-07 | 5.27E-05 |
| 3 | 372 | F2-3 vs. L2-3 | F2-3 up | + | biosynthetic process                                                          | GO:0009058 | Metabolism  | Metabolism  | P | 2811  | 218 | 112.99 | 1.93  | 5.23E-20 | 2.61E-17 |
| 3 | 373 | F2-3 vs. L2-3 | F2-3 up | + | carbon utilization                                                            | GO:0015976 | Metabolism  | Metabolism  | P | 8     | 4   | 0.32   | 12.44 | 8.56E-04 | 1.95E-02 |
| 3 | 374 | F2-3 vs. L2-3 | F2-3 up | + | carbon-carbon lyase activity                                                  | GO:0016830 | Metabolism  | Metabolism  | F | 111   | 18  | 4.46   | 4.03  | 2.47E-06 | 2.74E-04 |
| 3 | 375 | F2-3 vs. L2-3 | F2-3 up | + | carboxylic acid biosynthetic process                                          | GO:0046394 | Metabolism  | Metabolism  | P | 468   | 50  | 18.81  | 2.66  | 4.48E-09 | 4.06E-07 |
| 3 | 376 | F2-3 vs. L2-3 | F2-3 up | + | carboxylic acid metabolic process                                             | GO:0019752 | Metabolism  | Metabolism  | P | 912   | 103 | 36.66  | 2.81  | 3.26E-19 | 1.30E-16 |
| 3 | 377 | F2-3 vs. L2-3 | F2-3 up | + | carboxy-lyase activity                                                        | GO:0016831 | Metabolism  | Metabolism  | F | 68    | 10  | 2.73   | 3.66  | 8.27E-04 | 3.85E-02 |
| 3 | 378 | F2-3 vs. L2-3 | F2-3 up | + | catalytic activity                                                            | GO:0003824 | Metabolism  | Metabolism  | F | 8380  | 569 | 336.84 | 1.69  | 8.73E-46 | 2.81E-42 |
| 3 | 379 | F2-3 vs. L2-3 | F2-3 up | + | cation binding                                                                | GO:0043169 | Metabolism  | Metabolism  | F | 1637  | 116 | 65.8   | 1.76  | 1.35E-08 | 2.90E-06 |
| 3 | 380 | F2-3 vs. L2-3 | F2-3 up | + | cellular amino acid biosynthetic process                                      | GO:0008652 | Metabolism  | Metabolism  | P | 200   | 20  | 8.04   | 2.49  | 5.37E-04 | 1.31E-02 |
| 3 | 381 | F2-3 vs. L2-3 | F2-3 up | + | cellular amino acid metabolic process                                         | GO:0006520 | Metabolism  | Metabolism  | P | 391   | 42  | 15.72  | 2.67  | 5.24E-08 | 4.07E-06 |
| 3 | 382 | F2-3 vs. L2-3 | F2-3 up | + | cellular biosynthetic process                                                 | GO:0044249 | Metabolism  | Metabolism  | P | 2583  | 186 | 103.82 | 1.79  | 4.41E-14 | 1.01E-11 |
| 3 | 383 | F2-3 vs. L2-3 | F2-3 up | + | cellular glucan metabolic process                                             | GO:0006073 | Metabolism  | Metabolism  | P | 195   | 24  | 7.84   | 3.06  | 4.72E-06 | 2.17E-04 |
| 3 | 384 | F2-3 vs. L2-3 | F2-3 up | + | cellular lipid metabolic process                                              | GO:0044255 | Metabolism  | Metabolism  | P | 689   | 57  | 27.69  | 2.06  | 1.08E-06 | 6.40E-05 |
| 3 | 385 | F2-3 vs. L2-3 | F2-3 up | + | cellular metabolic process                                                    | GO:0044237 | Metabolism  | Metabolism  | P | 7649  | 437 | 307.46 | 1.42  | 1.96E-16 | 6.50E-14 |
| 3 | 386 | F2-3 vs. L2-3 | F2-3 up | + | cellular modified amino acid metabolic process                                | GO:0006575 | Metabolism  | Metabolism  | P | 96    | 11  | 3.86   | 2.85  | 2.87E-03 | 4.86E-02 |
| 3 | 387 | F2-3 vs. L2-3 | F2-3 up | + | cellulose biosynthetic process                                                | GO:0030244 | Metabolism  | Metabolism  | P | 50    | 10  | 2.01   | 4.98  | 9.27E-05 | 2.95E-03 |
| 3 | 388 | F2-3 vs. L2-3 | F2-3 up | + | cellulose metabolic process                                                   | GO:0030243 | Metabolism  | Metabolism  | P | 55    | 10  | 2.21   | 4.52  | 1.85E-04 | 5.36E-03 |
| 3 | 389 | F2-3 vs. L2-3 | F2-3 up | + | copper ion binding                                                            | GO:0005507 | Metabolism  | Metabolism  | F | 193   | 29  | 7.76   | 3.74  | 1.08E-08 | 2.48E-06 |
| 3 | 390 | F2-3 vs. L2-3 | F2-3 up | + | coumarin metabolic process                                                    | GO:0009804 | Metabolism  | Metabolism  | P | 9     | 4   | 0.36   | 11.06 | 1.20E-03 | 2.51E-02 |
| 3 | 391 | F2-3 vs. L2-3 | F2-3 up | + | dicarboxylic acid metabolic process                                           | GO:0043648 | Metabolism  | Metabolism  | P | 89    | 16  | 3.58   | 4.47  | 2.74E-06 | 1.38E-04 |
| 3 | 392 | F2-3 vs. L2-3 | F2-3 up | + | dioxygenase activity                                                          | GO:0051213 | Metabolism  | Metabolism  | F | 116   | 17  | 4.66   | 3.65  | 1.53E-05 | 1.45E-03 |
| 3 | 393 | F2-3 vs. L2-3 | F2-3 up | + | erythrose 4-phosphate/phosphoenolpyruvate family amino acid metabolic process | GO:1902221 | Metabolism  | Metabolism  | P | 26    | 6   | 1.05   | 5.74  | 1.26E-03 | 2.60E-02 |
| 3 | 394 | F2-3 vs. L2-3 | F2-3 up | + | establishment of localization                                                 | GO:0051234 | Metabolism  | Metabolism  | P | 2306  | 148 | 92.69  | 1.6   | 4.89E-08 | 3.85E-06 |
| 3 | 395 | F2-3 vs. L2-3 | F2-3 up | + | galacturonan metabolic process                                                | GO:0010393 | Metabolism  | Metabolism  | P | 163   | 21  | 6.55   | 3.21  | 9.73E-06 | 4.10E-04 |
| 3 | 396 | F2-3 vs. L2-3 | F2-3 up | + | glucan biosynthetic process                                                   | GO:0009250 | Metabolism  | Metabolism  | P | 118   | 16  | 4.74   | 3.37  | 6.27E-05 | 2.09E-03 |
| 3 | 397 | F2-3 vs. L2-3 | F2-3 up | + | glucan metabolic process                                                      | GO:0044042 | Metabolism  | Metabolism  | P | 203   | 24  | 8.16   | 2.94  | 8.73E-06 | 3.75E-04 |
| 3 | 398 | F2-3 vs. L2-3 | F2-3 up | + | glucosinolate biosynthetic process                                            | GO:0019761 | Metabolism  | Metabolism  | P | 39    | 11  | 1.57   | 7.02  | 2.55E-06 | 1.32E-04 |
| 3 | 399 | F2-3 vs. L2-3 | F2-3 up | + | glucosinolate metabolic process                                               | GO:0019760 | Metabolism  | Metabolism  | P | 112   | 16  | 4.5    | 3.55  | 3.57E-05 | 1.30E-03 |
| 3 | 400 | F2-3 vs. L2-3 | F2-3 up | + | glucosyltransferase activity                                                  | GO:0046527 | Metabolism  | Metabolism  | F | 190   | 19  | 7.64   | 2.49  | 7.71E-04 | 3.76E-02 |
| 3 | 401 | F2-3 vs. L2-3 | F2-3 up | + | glutamate metabolic process                                                   | GO:0006536 | Metabolism  | Metabolism  | P | 27    | 8   | 1.09   | 7.37  | 4.50E-05 | 1.57E-03 |
| 3 | 402 | F2-3 vs. L2-3 | F2-3 up | + | glutamine family amino acid metabolic process                                 | GO:0009064 | Metabolism  | Metabolism  | P | 58    | 10  | 2.33   | 4.29  | 2.70E-04 | 7.35E-03 |
| 3 | 403 | F2-3 vs. L2-3 | F2-3 up | + | glycine metabolic process                                                     | GO:0006544 | Metabolism  | Metabolism  | P | 18    | 5   | 0.72   | 6.91  | 1.61E-03 | 3.08E-02 |

|   |     |               |         |   |                                                      |            |            |            |   |       |     |        |       |          |          |
|---|-----|---------------|---------|---|------------------------------------------------------|------------|------------|------------|---|-------|-----|--------|-------|----------|----------|
| 3 | 404 | F2-3 vs. L2-3 | F2-3 up | + | glycosaminoglycan biosynthetic process               | GO:0006024 | Metabolism | Metabolism | P | 4     | 3   | 0.16   | 18.66 | 1.79E-03 | 3.30E-02 |
| 3 | 405 | F2-3 vs. L2-3 | F2-3 up | + | glycosaminoglycan metabolic process                  | GO:0030203 | Metabolism | Metabolism | P | 4     | 3   | 0.16   | 18.66 | 1.79E-03 | 3.32E-02 |
| 3 | 406 | F2-3 vs. L2-3 | F2-3 up | + | glycosinolate biosynthetic process                   | GO:0019758 | Metabolism | Metabolism | P | 39    | 11  | 1.57   | 7.02  | 2.55E-06 | 1.30E-04 |
| 3 | 407 | F2-3 vs. L2-3 | F2-3 up | + | glycosinolate metabolic process                      | GO:0019757 | Metabolism | Metabolism | P | 112   | 16  | 4.5    | 3.55  | 3.57E-05 | 1.29E-03 |
| 3 | 408 | F2-3 vs. L2-3 | F2-3 up | + | glycosyl compound biosynthetic process               | GO:1901659 | Metabolism | Metabolism | P | 62    | 13  | 2.49   | 5.22  | 5.46E-06 | 2.45E-04 |
| 3 | 409 | F2-3 vs. L2-3 | F2-3 up | + | glycosyl compound metabolic process                  | GO:1901657 | Metabolism | Metabolism | P | 187   | 20  | 7.52   | 2.66  | 1.66E-04 | 4.94E-03 |
| 3 | 410 | F2-3 vs. L2-3 | F2-3 up | + | heme binding                                         | GO:0020037 | Metabolism | Metabolism | F | 374   | 31  | 15.03  | 2.06  | 3.56E-04 | 2.01E-02 |
| 3 | 411 | F2-3 vs. L2-3 | F2-3 up | + | homogalacturonan metabolic process                   | GO:0010394 | Metabolism | Metabolism | P | 4     | 3   | 0.16   | 18.66 | 1.79E-03 | 3.28E-02 |
| 3 | 412 | F2-3 vs. L2-3 | F2-3 up | + | hydrolase activity                                   | GO:0016787 | Metabolism | Metabolism | F | 2995  | 185 | 120.39 | 1.54  | 9.73E-09 | 2.61E-06 |
| 3 |     | F2-3 vs. L2-3 | F2-3 up | + | hydrolase activity, hydrolyzing O-glycosyl compounds | GO:0004553 | Metabolism | Metabolism | F |       |     |        | 2.07  | 1.97E-04 | 1.15E-02 |
|   | 413 |               |         |   |                                                      |            | Metabolism | Metabolism | F | 396   | 33  | 15.92  |       |          |          |
| 3 | 414 | F2-3 vs. L2-3 | F2-3 up | + | ion binding                                          | GO:0043167 | Metabolism | Metabolism | F | 2847  | 188 | 114.44 | 1.64  | 4.90E-11 | 1.97E-08 |
| 3 | 415 | F2-3 vs. L2-3 | F2-3 up | + | iron ion binding                                     | GO:0005506 | Metabolism | Metabolism | F | 325   | 30  | 13.06  | 2.3   | 6.96E-05 | 4.66E-03 |
| 3 | 416 | F2-3 vs. L2-3 | F2-3 up | + | lignin biosynthetic process                          | GO:0009809 | Metabolism | Metabolism | P | 42    | 9   | 1.69   | 5.33  | 1.31E-04 | 4.06E-03 |
| 3 | 417 | F2-3 vs. L2-3 | F2-3 up | + | lignin metabolic process                             | GO:0009808 | Metabolism | Metabolism | P | 53    | 11  | 2.13   | 5.16  | 3.10E-05 | 1.14E-03 |
| 3 | 418 | F2-3 vs. L2-3 | F2-3 up | + | lipid biosynthetic process                           | GO:0008610 | Metabolism | Metabolism | P | 512   | 41  | 20.58  | 1.99  | 7.68E-05 | 2.48E-03 |
| 3 | 419 | F2-3 vs. L2-3 | F2-3 up | + | lipid metabolic process                              | GO:0006629 | Metabolism | Metabolism | P | 828   | 67  | 33.28  | 2.01  | 3.39E-07 | 2.54E-05 |
| 3 | 420 | F2-3 vs. L2-3 | F2-3 up | + | localization                                         | GO:0051179 | Metabolism | Metabolism | P | 2471  | 159 | 99.32  | 1.6   | 1.11E-08 | 9.08E-07 |
| 3 | 421 | F2-3 vs. L2-3 | F2-3 up | + | L-phenylalanine metabolic process                    | GO:0006558 | Metabolism | Metabolism | P | 26    | 6   | 1.05   | 5.74  | 1.26E-03 | 2.61E-02 |
| 3 | 422 | F2-3 vs. L2-3 | F2-3 up | + | lyase activity                                       | GO:0016829 | Metabolism | Metabolism | F | 339   | 40  | 13.63  | 2.94  | 1.07E-08 | 2.64E-06 |
| 3 | 423 | F2-3 vs. L2-3 | F2-3 up | + | metabolic process                                    | GO:0008152 | Metabolism | Metabolism | P | 8681  | 525 | 348.94 | 1.5   | 4.42E-27 | 6.61E-24 |
| 3 | 424 | F2-3 vs. L2-3 | F2-3 up | + | metal ion binding                                    | GO:0046872 | Metabolism | Metabolism | F | 1610  | 114 | 64.71  | 1.76  | 2.20E-08 | 4.41E-06 |
| 3 | 425 | F2-3 vs. L2-3 | F2-3 up | + | molecular_function                                   | GO:0003674 | Metabolism | Metabolism | F | 21945 | 969 | 882.09 | 1.1   | 1.08E-11 | 5.78E-09 |
| 3 | 426 | F2-3 vs. L2-3 | F2-3 up | + | monocarboxylic acid biosynthetic process             | GO:0072330 | Metabolism | Metabolism | P | 211   | 25  | 8.48   | 2.95  | 5.52E-06 | 2.46E-04 |
| 3 | 427 | F2-3 vs. L2-3 | F2-3 up | + | monocarboxylic acid metabolic process                | GO:0032787 | Metabolism | Metabolism | P | 439   | 54  | 17.65  | 3.06  | 6.95E-12 | 1.22E-09 |
| 3 | 428 | F2-3 vs. L2-3 | F2-3 up | + | monooxygenase activity                               | GO:0004497 | Metabolism | Metabolism | F | 222   | 24  | 8.92   | 2.69  | 3.32E-05 | 2.66E-03 |
| 3 | 429 | F2-3 vs. L2-3 | F2-3 up | + | monosaccharide metabolic process                     | GO:0005996 | Metabolism | Metabolism | P | 125   | 17  | 5.02   | 3.38  | 3.62E-05 | 1.30E-03 |
| 3 | 430 | F2-3 vs. L2-3 | F2-3 up | + | mucilage biosynthetic process                        | GO:0010192 | Metabolism | Metabolism | P | 30    | 6   | 1.21   | 4.98  | 2.37E-03 | 4.19E-02 |
| 3 | 431 | F2-3 vs. L2-3 | F2-3 up | + | mucilage metabolic process                           | GO:0010191 | Metabolism | Metabolism | P | 37    | 7   | 1.49   | 4.71  | 1.38E-03 | 2.73E-02 |
| 3 | 432 | F2-3 vs. L2-3 | F2-3 up | + | organic acid biosynthetic process                    | GO:0016053 | Metabolism | Metabolism | P | 468   | 50  | 18.81  | 2.66  | 4.48E-09 | 4.12E-07 |
| 3 | 433 | F2-3 vs. L2-3 | F2-3 up | + | organic acid metabolic process                       | GO:0006082 | Metabolism | Metabolism | P | 1019  | 115 | 40.96  | 2.81  | 2.38E-21 | 1.42E-18 |
| 3 | 434 | F2-3 vs. L2-3 | F2-3 up | + | organic cyclic compound biosynthetic process         | GO:1901362 | Metabolism | Metabolism | P | 899   | 70  | 36.14  | 1.94  | 6.24E-07 | 4.29E-05 |
| 3 | 435 | F2-3 vs. L2-3 | F2-3 up | + | organic hydroxy compound biosynthetic process        | GO:1901617 | Metabolism | Metabolism | P | 172   | 19  | 6.91   | 2.75  | 1.64E-04 | 4.90E-03 |
| 3 | 436 | F2-3 vs. L2-3 | F2-3 up | + | organic hydroxy compound metabolic process           | GO:1901615 | Metabolism | Metabolism | P | 292   | 32  | 11.74  | 2.73  | 1.34E-06 | 7.64E-05 |
| 3 | 437 | F2-3 vs. L2-3 | F2-3 up | + | organic substance biosynthetic process               | GO:1901576 | Metabolism | Metabolism | P | 2674  | 201 | 107.48 | 1.87  | 5.61E-17 | 1.97E-14 |
| 3 | 438 | F2-3 vs. L2-3 | F2-3 up | + | organic substance metabolic process                  | GO:0071704 | Metabolism | Metabolism | P | 7851  | 425 | 315.57 | 1.35  | 4.17E-12 | 7.79E-10 |
| 3 | 439 | F2-3 vs. L2-3 | F2-3 up | + | organonitrogen compound biosynthetic process         | GO:1901566 | Metabolism | Metabolism | P | 1343  | 79  | 53.98  | 1.46  | 1.43E-03 | 2.79E-02 |
| 3 | 440 | F2-3 vs. L2-3 | F2-3 up | + | organophosphate metabolic process                    | GO:0019637 | Metabolism | Metabolism | P | 583   | 48  | 23.43  | 2.05  | 8.82E-06 | 3.77E-04 |
| 3 | 441 | F2-3 vs. L2-3 | F2-3 up | + | oxidation-reduction process                          | GO:0055114 | Metabolism | Metabolism | P | 768   | 101 | 30.87  | 3.27  | 3.73E-23 | 2.79E-20 |
| 3 | 442 | F2-3 vs. L2-3 | F2-3 up | + | oxoacid metabolic process                            | GO:0043436 | Metabolism | Metabolism | P | 1016  | 115 | 40.84  | 2.82  | 1.92E-21 | 1.28E-18 |
| 3 | 443 | F2-3 vs. L2-3 | F2-3 up | + | oxylipin biosynthetic process                        | GO:0031408 | Metabolism | Metabolism | P | 17    | 5   | 0.68   | 7.32  | 1.30E-03 | 2.64E-02 |
| 3 | 444 | F2-3 vs. L2-3 | F2-3 up | + | oxylipin metabolic process                           | GO:0031407 | Metabolism | Metabolism | P | 19    | 5   | 0.76   | 6.55  | 1.97E-03 | 3.55E-02 |
| 3 | 445 | F2-3 vs. L2-3 | F2-3 up | + | pectin metabolic process                             | GO:0045488 | Metabolism | Metabolism | P | 162   | 21  | 6.51   | 3.22  | 8.94E-06 | 3.79E-04 |
| 3 | 446 | F2-3 vs. L2-3 | F2-3 up | + | phenylpropanoid biosynthetic process                 | GO:0009699 | Metabolism | Metabolism | P | 88    | 15  | 3.54   | 4.24  | 9.85E-06 | 4.09E-04 |
| 3 | 447 | F2-3 vs. L2-3 | F2-3 up | + | phenylpropanoid metabolic process                    | GO:0009698 | Metabolism | Metabolism | P | 109   | 17  | 4.38   | 3.88  | 7.40E-06 | 3.23E-04 |
| 3 |     | F2-3 vs. L2-3 | F2-3 up | + | phosphate-containing compound metabolic process      | GO:0006796 | Metabolism | Metabolism | P |       |     |        | 1.51  | 2.68E-05 | 1.01E-03 |
|   | 448 |               |         |   |                                                      |            | Metabolism | Metabolism | P | 1858  | 113 | 74.68  |       |          |          |
| 3 | 449 | F2-3 vs. L2-3 | F2-3 up | + | phosphorus metabolic process                         | GO:0006793 | Metabolism | Metabolism | P | 1903  | 123 | 76.49  | 1.61  | 5.92E-07 | 4.16E-05 |
| 3 | 450 | F2-3 vs. L2-3 | F2-3 up | + | proton export across plasma membrane                 | GO:0120029 | Metabolism | Metabolism | P | 10    | 5   | 0.4    | 12.44 | 1.85E-04 | 5.36E-03 |
| 3 | 451 | F2-3 vs. L2-3 | F2-3 up | + | purine ribonucleotide metabolic process              | GO:0009150 | Metabolism | Metabolism | P | 200   | 19  | 8.04   | 2.36  | 1.08E-03 | 2.33E-02 |
| 3 | 452 | F2-3 vs. L2-3 | F2-3 up | + | purine-containing compound biosynthetic              | GO:0072522 | Metabolism | Metabolism | P | 126   | 13  | 5.06   | 2.57  | 2.91E-03 | 4.92E-02 |
| 3 | 453 | F2-3 vs. L2-3 | F2-3 up | + | purine-containing compound metabolic process         | GO:0072521 | Metabolism | Metabolism | P | 243   | 21  | 9.77   | 2.15  | 1.85E-03 | 3.37E-02 |
| 3 | 454 | F2-3 vs. L2-3 | F2-3 up | + | pyridoxal phosphate binding                          | GO:0030170 | Metabolism | Metabolism | F | 98    | 14  | 3.94   | 3.55  | 1.08E-04 | 6.54E-03 |
| 3 | 455 | F2-3 vs. L2-3 | F2-3 up | + | S-adenosylmethionine biosynthetic process            | GO:0006556 | Metabolism | Metabolism | P | 4     | 3   | 0.16   | 18.66 | 1.79E-03 | 3.33E-02 |
| 3 | 456 | F2-3 vs. L2-3 | F2-3 up | + | S-adenosylmethionine metabolic process               | GO:0046500 | Metabolism | Metabolism | P | 9     | 4   | 0.36   | 11.06 | 1.20E-03 | 2.51E-02 |
| 3 | 457 | F2-3 vs. L2-3 | F2-3 up | + | secondary metabolic process                          | GO:0019748 | Metabolism | Metabolism | P | 303   | 39  | 12.18  | 3.2   | 1.85E-09 | 1.79E-07 |
| 3 | 458 | F2-3 vs. L2-3 | F2-3 up | + | secondary metabolite biosynthetic process            | GO:0044550 | Metabolism | Metabolism | P | 144   | 28  | 5.79   | 4.84  | 1.20E-10 | 1.52E-08 |
| 3 | 459 | F2-3 vs. L2-3 | F2-3 up | + | sequestering of actin monomers                       | GO:0042989 | Metabolism | Metabolism | P | 5     | 3   | 0.2    | 14.93 | 2.78E-03 | 4.81E-02 |
| 3 | 460 | F2-3 vs. L2-3 | F2-3 up | + | serine family amino acid metabolic process           | GO:0009069 | Metabolism | Metabolism | P | 58    | 9   | 2.33   | 3.86  | 1.06E-03 | 2.30E-02 |
| 3 | 461 | F2-3 vs. L2-3 | F2-3 up | + | S-glycoside biosynthetic process                     | GO:0016144 | Metabolism | Metabolism | P | 39    | 11  | 1.57   | 7.02  | 2.55E-06 | 1.33E-04 |
| 3 | 462 | F2-3 vs. L2-3 | F2-3 up | + | S-glycoside metabolic process                        | GO:0016143 | Metabolism | Metabolism | P | 112   | 16  | 4.5    | 3.55  | 3.57E-05 | 1.31E-03 |
| 3 | 463 | F2-3 vs. L2-3 | F2-3 up | + | small molecule binding                               | GO:0036094 | Metabolism | Metabolism | F | 1340  | 93  | 53.86  | 1.73  | 1.01E-06 | 1.25E-04 |



|   |     |               |         |   |                                                                |            |                        |                      |   |      |     |        |       |          |          |
|---|-----|---------------|---------|---|----------------------------------------------------------------|------------|------------------------|----------------------|---|------|-----|--------|-------|----------|----------|
| 3 | 464 | F2-3 vs. L2-3 | F2-3 up | + | small molecule biosynthetic process                            | GO:0044283 | Metabolism             | Metabolism           | P | 645  | 67  | 25.93  | 2.58  | 3.53E-11 | 5.41E-09 |
| 3 | 465 | F2-3 vs. L2-3 | F2-3 up | + | small molecule metabolic process                               | GO:0044281 | Metabolism             | Metabolism           | P | 1520 | 158 | 61.1   | 2.59  | 9.47E-26 | 1.13E-22 |
| 3 | 466 | F2-3 vs. L2-3 | F2-3 up | + | sulfur compound biosynthetic process                           | GO:0044272 | Metabolism             | Metabolism           | P | 142  | 31  | 5.71   | 5.43  | 9.04E-13 | 1.86E-10 |
| 3 | 467 | F2-3 vs. L2-3 | F2-3 up | + | sulfur compound metabolic process                              | GO:0006790 | Metabolism             | Metabolism           | P | 363  | 47  | 14.59  | 3.22  | 3.40E-11 | 5.35E-09 |
| 3 | 468 | F2-3 vs. L2-3 | F2-3 up | + | tetrapyrrole binding                                           | GO:0046906 | Metabolism             | Metabolism           | F | 404  | 32  | 16.24  | 1.97  | 5.98E-04 | 3.00E-02 |
| 3 | 469 | F2-3 vs. L2-3 | F2-3 up | + | thioester biosynthetic process                                 | GO:0035384 | Metabolism             | Metabolism           | P | 21   | 5   | 0.84   | 5.92  | 2.85E-03 | 4.89E-02 |
| 3 | 470 | F2-3 vs. L2-3 | F2-3 up | + | transferase activity, transferring nitrogenous groups          | GO:0016769 | Metabolism             | Metabolism           | F | 52   | 9   | 2.09   | 4.31  | 5.29E-04 | 2.79E-02 |
| 3 | 471 | F2-3 vs. L2-3 | F2-3 up | + | transition metal ion binding                                   | GO:0046914 | Metabolism             | Metabolism           | F | 1178 | 82  | 47.35  | 1.73  | 4.29E-06 | 4.45E-04 |
| 3 | 472 | F2-3 vs. L2-3 | F2-3 up | + | UDP-glucuronate biosynthetic process                           | GO:0006065 | Metabolism             | Metabolism           | P | 4    | 3   | 0.16   | 18.66 | 1.79E-03 | 3.31E-02 |
| 3 | 473 | F2-3 vs. L2-3 | F2-3 up | + | UDP-glucuronate metabolic process                              | GO:0046398 | Metabolism             | Metabolism           | P | 5    | 3   | 0.2    | 14.93 | 2.78E-03 | 4.83E-02 |
| 3 | 474 | F2-3 vs. L2-3 | F2-3 up | + | UDP-rhamnose biosynthetic process                              | GO:0010253 | Metabolism             | Metabolism           | P | 4    | 3   | 0.16   | 18.66 | 1.79E-03 | 3.27E-02 |
| 3 | 475 | F2-3 vs. L2-3 | F2-3 up | + | UDP-rhamnose metabolic process                                 | GO:0033478 | Metabolism             | Metabolism           | P | 4    | 3   | 0.16   | 18.66 | 1.79E-03 | 3.34E-02 |
| 3 | 476 | F2-3 vs. L2-3 | F2-3 up | + | vitamin B6 binding                                             | GO:0070279 | Metabolism             | Metabolism           | F | 98   | 14  | 3.94   | 3.55  | 1.08E-04 | 6.67E-03 |
| 3 | 477 | F2-3 vs. L2-3 | F2-3 up | + | carbon fixation                                                | GO:0015977 | Metabolism             | Photosynthesis       | P | 16   | 8   | 0.64   | 12.44 | 2.05E-06 | 1.10E-04 |
| 3 | 478 | F2-3 vs. L2-3 | F2-3 up | + | chloroplast                                                    | GO:0009507 | Metabolism             | Photosynthesis       | C | 5013 | 329 | 201.5  | 1.63  | 9.22E-20 | 1.20E-17 |
| 3 | 479 | F2-3 vs. L2-3 | F2-3 up | + | chloroplast envelope                                           | GO:0009941 | Metabolism             | Photosynthesis       | C | 613  | 76  | 24.64  | 3.08  | 2.19E-16 | 1.63E-14 |
| 3 | 480 | F2-3 vs. L2-3 | F2-3 up | + | chloroplast stroma                                             | GO:0009570 | Metabolism             | Photosynthesis       | C | 719  | 92  | 28.9   | 3.18  | 1.93E-20 | 3.35E-18 |
| 3 | 481 | F2-3 vs. L2-3 | F2-3 up | + | chloroplast thylakoid                                          | GO:0009534 | Metabolism             | Photosynthesis       | C | 443  | 65  | 17.81  | 3.65  | 2.45E-17 | 2.55E-15 |
| 3 | 482 | F2-3 vs. L2-3 | F2-3 up | + | chloroplast thylakoid membrane                                 | GO:0009535 | Metabolism             | Photosynthesis       | C | 358  | 55  | 14.39  | 3.82  | 1.29E-15 | 7.49E-14 |
| 3 | 483 | F2-3 vs. L2-3 | F2-3 up | + | chloroplast thylakoid membrane protein complex                 | GO:0098807 | Metabolism             | Photosynthesis       | C | 24   | 6   | 0.96   | 6.22  | 8.79E-04 | 1.61E-02 |
| 3 | 484 | F2-3 vs. L2-3 | F2-3 up | + | photosynthesis                                                 | GO:0015979 | Metabolism             | Photosynthesis       | P | 189  | 38  | 7.6    | 5     | 2.39E-14 | 5.71E-12 |
| 3 | 485 | F2-3 vs. L2-3 | F2-3 up | + | photosynthesis, dark reaction                                  | GO:0019685 | Metabolism             | Photosynthesis       | P | 15   | 8   | 0.6    | 13.27 | 1.42E-06 | 7.98E-05 |
| 3 | 486 | F2-3 vs. L2-3 | F2-3 up | + | photosynthesis, light reaction                                 | GO:0019684 | Metabolism             | Photosynthesis       | P | 128  | 20  | 5.15   | 3.89  | 1.16E-06 | 6.68E-05 |
| 3 | 487 | F2-3 vs. L2-3 | F2-3 up | + | photosynthetic electron transport chain                        | GO:0009767 | Metabolism             | Photosynthesis       | P | 46   | 8   | 1.85   | 4.33  | 1.04E-03 | 2.29E-02 |
| 3 | 488 | F2-3 vs. L2-3 | F2-3 up | + | photosynthetic electron transport in photosystem               | GO:0009773 | Metabolism             | Photosynthesis       | P | 17   | 5   | 0.68   | 7.32  | 1.30E-03 | 2.65E-02 |
| 3 | 489 | F2-3 vs. L2-3 | F2-3 up | + | photosynthetic membrane                                        | GO:0034357 | Metabolism             | Photosynthesis       | C | 395  | 59  | 15.88  | 3.72  | 3.67E-16 | 2.38E-14 |
| 3 | 490 | F2-3 vs. L2-3 | F2-3 up | + | photosystem II assembly                                        | GO:0010207 | Metabolism             | Photosynthesis       | P | 26   | 6   | 1.05   | 5.74  | 1.26E-03 | 2.59E-02 |
| 3 | 491 | F2-3 vs. L2-3 | F2-3 up | + | plastid                                                        | GO:0009536 | Metabolism             | Photosynthesis       | C | 5432 | 352 | 218.34 | 1.61  | 1.56E-20 | 3.24E-18 |
| 3 | 492 | F2-3 vs. L2-3 | F2-3 up | + | plastid envelope                                               | GO:0009526 | Metabolism             | Photosynthesis       | C | 637  | 77  | 25.6   | 3.01  | 4.82E-16 | 2.95E-14 |
| 3 | 493 | F2-3 vs. L2-3 | F2-3 up | + | plastid stroma                                                 | GO:0009532 | Metabolism             | Photosynthesis       | C | 731  | 92  | 29.38  | 3.13  | 5.21E-20 | 7.75E-18 |
| 3 | 494 | F2-3 vs. L2-3 | F2-3 up | + | plastid thylakoid                                              | GO:0031976 | Metabolism             | Photosynthesis       | C | 446  | 65  | 17.93  | 3.63  | 3.30E-17 | 2.87E-15 |
| 3 | 495 | F2-3 vs. L2-3 | F2-3 up | + | plastid thylakoid membrane                                     | GO:0055035 | Metabolism             | Photosynthesis       | C | 363  | 55  | 14.59  | 3.77  | 2.19E-15 | 1.20E-13 |
| 3 | 496 | F2-3 vs. L2-3 | F2-3 up | + | plastoglobule                                                  | GO:0010287 | Metabolism             | Photosynthesis       | C | 76   | 11  | 3.05   | 3.6   | 5.21E-04 | 1.08E-02 |
| 3 | 497 | F2-3 vs. L2-3 | F2-3 up | + | thylakoid                                                      | GO:0009579 | Metabolism             | Photosynthesis       | C | 537  | 81  | 21.58  | 3.75  | 5.37E-22 | 1.40E-19 |
| 3 | 498 | F2-3 vs. L2-3 | F2-3 up | + | thylakoid lumen                                                | GO:0031977 | Metabolism             | Photosynthesis       | C | 63   | 9   | 2.53   | 3.55  | 1.78E-03 | 2.81E-02 |
| 3 | 499 | F2-3 vs. L2-3 | F2-3 up | + | thylakoid membrane                                             | GO:0042651 | Metabolism             | Photosynthesis       | C | 390  | 59  | 15.68  | 3.76  | 2.19E-16 | 1.52E-14 |
| 3 | 500 | F2-3 vs. L2-3 | F2-3 up | + | endoplasmic reticulum                                          | GO:0005783 | Regulation             | Protein modification | C | 1044 | 64  | 41.96  | 1.53  | 1.41E-03 | 2.45E-02 |
| 3 | 501 | F2-3 vs. L2-3 | F2-3 up | + | Golgi apparatus                                                | GO:0005794 | Regulation             | Protein modification | C | 1161 | 75  | 46.67  | 1.61  | 1.12E-04 | 2.47E-03 |
| 3 | 502 | F2-3 vs. L2-3 | F2-3 up | - | regulation of cellular macromolecule biosynthetic process      | GO:2000112 | Regulation             | Regulation           | P | 2365 | 65  | 95.06  | 0.68  | 1.14E-03 | 2.44E-02 |
| 3 | 503 | F2-3 vs. L2-3 | F2-3 up | - | regulation of macromolecule biosynthetic process               | GO:0010556 | Regulation             | Regulation           | P | 2378 | 66  | 95.58  | 0.69  | 1.42E-03 | 2.79E-02 |
| 3 | 504 | F2-3 vs. L2-3 | F2-3 up | - | regulation of macromolecule metabolic process                  | GO:0060255 | Regulation             | Regulation           | P | 3058 | 81  | 122.92 | 0.66  | 4.39E-05 | 1.54E-03 |
| 3 | 505 | F2-3 vs. L2-3 | F2-3 up | - | regulation of nitrogen compound metabolic process              | GO:0051171 | Regulation             | Regulation           | P | 2741 | 77  | 110.18 | 0.7   | 7.97E-04 | 1.86E-02 |
| 3 | 506 | F2-3 vs. L2-3 | F2-3 up | - | regulation of nucleobase-containing compound metabolic process | GO:0019219 | Regulation             | Regulation           | P | 2344 | 66  | 94.22  | 0.7   | 2.33E-03 | 4.13E-02 |
| 3 | 507 | F2-3 vs. L2-3 | F2-3 up | + | regulation of biological quality                               | GO:0065008 | Regulation             | Regulation           | P | 972  | 68  | 39.07  | 1.74  | 2.53E-05 | 9.57E-04 |
| 3 | 508 | F2-3 vs. L2-3 | F2-3 up | + | regulation of cell morphogenesis involved in differentiation   | GO:0010769 | Regulation             | Regulation           | P | 40   | 10  | 1.61   | 6.22  | 1.79E-05 | 7.00E-04 |
| 3 | 509 | F2-3 vs. L2-3 | F2-3 up | + | regulation of pollen tube growth                               | GO:0080092 | Regulation             | Regulation           | P | 35   | 10  | 1.41   | 7.11  | 6.63E-06 | 2.91E-04 |
| 3 | 510 | F2-3 vs. L2-3 | F2-3 up | + | regulation of unidimensional cell growth                       | GO:0051510 | Regulation             | Regulation           | P | 74   | 11  | 2.97   | 3.7   | 4.26E-04 | 1.10E-02 |
| 3 | 511 | F2-3 vs. L2-3 | F2-3 up | + | auxin efflux                                                   | GO:0010315 | Signaling and response | Signaling            | P | 15   | 5   | 0.6    | 8.29  | 8.15E-04 | 1.87E-02 |
| 3 | 512 | F2-3 vs. L2-3 | F2-3 up | + | cellular response to abiotic stimulus                          | GO:0071214 | Signaling and response | Signaling            | P | 189  | 21  | 7.6    | 2.76  | 7.05E-05 | 2.29E-03 |
| 3 | 513 | F2-3 vs. L2-3 | F2-3 up | + | cellular response to blue light                                | GO:0071483 | Signaling and response | Signaling            | P | 27   | 6   | 1.09   | 5.53  | 1.49E-03 | 2.89E-02 |
| 3 | 514 | F2-3 vs. L2-3 | F2-3 up | + | cellular response to chemical stimulus                         | GO:0070887 | Signaling and response | Signaling            | P | 1085 | 71  | 43.61  | 1.63  | 1.24E-04 | 3.90E-03 |
| 3 | 515 | F2-3 vs. L2-3 | F2-3 up | + | cellular response to environmental stimulus                    | GO:0104004 | Signaling and response | Signaling            | P | 189  | 21  | 7.6    | 2.76  | 7.05E-05 | 2.30E-03 |
| 3 | 516 | F2-3 vs. L2-3 | F2-3 up | + | cellular response to extracellular stimulus                    | GO:0031668 | Signaling and response | Signaling            | P | 213  | 19  | 8.56   | 2.22  | 2.85E-03 | 4.85E-02 |
| 3 | 517 | F2-3 vs. L2-3 | F2-3 up | + | cellular response to light stimulus                            | GO:0071482 | Signaling and response | Signaling            | P | 104  | 14  | 4.18   | 3.35  | 1.89E-04 | 5.44E-03 |
| 3 | 518 | F2-3 vs. L2-3 | F2-3 up | + | cellular response to oxygen levels                             | GO:0071453 | Signaling and response | Signaling            | P | 238  | 21  | 9.57   | 2.2   | 1.60E-03 | 3.08E-02 |
| 3 | 519 | F2-3 vs. L2-3 | F2-3 up | + | cellular response to oxygen-containing                         | GO:1901701 | Signaling and response | Signaling            | P | 509  | 36  | 20.46  | 1.76  | 2.20E-03 | 3.93E-02 |
| 3 | 520 | F2-3 vs. L2-3 | F2-3 up | + | cellular response to radiation                                 | GO:0071478 | Signaling and response | Signaling            | P | 110  | 14  | 4.42   | 3.17  | 3.19E-04 | 8.62E-03 |

|   |     |               |         |   |                                                        |            |                        |           |   |      |     |        |       |          |          |
|---|-----|---------------|---------|---|--------------------------------------------------------|------------|------------------------|-----------|---|------|-----|--------|-------|----------|----------|
| 3 | 521 | F2-3 vs. L2-3 | F2-3 up | + | jasmonic acid biosynthetic process                     | GO:0009695 | Signaling and response | Signaling | P | 26   | 7   | 1.05   | 6.7   | 2.23E-04 | 6.27E-03 |
| 3 | 522 | F2-3 vs. L2-3 | F2-3 up | + | jasmonic acid metabolic process                        | GO:0009694 | Signaling and response | Signaling | P | 50   | 8   | 2.01   | 3.98  | 1.67E-03 | 3.16E-02 |
| 3 | 523 | F2-3 vs. L2-3 | F2-3 up | + | multicellular organismal process                       | GO:0032501 | Signaling and response | Signaling | P | 2741 | 177 | 110.18 | 1.61  | 1.26E-09 | 1.30E-07 |
| 3 | 524 | F2-3 vs. L2-3 | F2-3 up | + | multi-organism process                                 | GO:0051704 | Signaling and response | Signaling | P | 527  | 42  | 21.18  | 1.98  | 6.43E-05 | 2.12E-03 |
| 3 | 525 | F2-3 vs. L2-3 | F2-3 up | + | regulation of auxin mediated signaling pathway         | GO:0010928 | Signaling and response | Signaling | P | 42   | 8   | 1.69   | 4.74  | 6.15E-04 | 1.48E-02 |
| 3 | 526 | F2-3 vs. L2-3 | F2-3 up | + | regulation of jasmonic acid mediated signaling pathway | GO:2000022 | Signaling and response | Signaling | P | 41   | 8   | 1.65   | 4.85  | 5.34E-04 | 1.31E-02 |
| 3 | 527 | F2-3 vs. L2-3 | F2-3 up | + | response to abiotic stimulus                           | GO:0009628 | Signaling and response | Signaling | P | 2131 | 189 | 85.66  | 2.21  | 3.01E-23 | 2.57E-20 |
| 3 | 528 | F2-3 vs. L2-3 | F2-3 up | + | response to acid chemical                              | GO:0001101 | Signaling and response | Signaling | P | 397  | 44  | 15.96  | 2.76  | 1.10E-08 | 9.11E-07 |
| 3 | 529 | F2-3 vs. L2-3 | F2-3 up | + | response to auxin                                      | GO:0009733 | Signaling and response | Signaling | P | 300  | 25  | 12.06  | 2.07  | 1.18E-03 | 2.49E-02 |
| 3 | 530 | F2-3 vs. L2-3 | F2-3 up | + | response to bacterium                                  | GO:0009617 | Signaling and response | Signaling | P | 508  | 62  | 20.42  | 3.04  | 2.56E-13 | 5.68E-11 |
| 3 | 531 | F2-3 vs. L2-3 | F2-3 up | + | response to biotic stimulus                            | GO:0009607 | Signaling and response | Signaling | P | 1098 | 106 | 44.13  | 2.4   | 2.33E-15 | 6.63E-13 |
| 3 | 532 | F2-3 vs. L2-3 | F2-3 up | + | response to cadmium ion                                | GO:0046686 | Signaling and response | Signaling | P | 315  | 43  | 12.66  | 3.4   | 5.22E-11 | 7.43E-09 |
| 3 | 533 | F2-3 vs. L2-3 | F2-3 up | + | response to carbohydrate                               | GO:0009743 | Signaling and response | Signaling | P | 153  | 17  | 6.15   | 2.76  | 3.33E-04 | 8.90E-03 |
| 3 | 534 | F2-3 vs. L2-3 | F2-3 up | + | response to chemical                                   | GO:0042221 | Signaling and response | Signaling | P | 2681 | 237 | 107.76 | 2.2   | 2.30E-29 | 4.58E-26 |
| 3 | 535 | F2-3 vs. L2-3 | F2-3 up | + | response to chitin                                     | GO:0010200 | Signaling and response | Signaling | P | 139  | 16  | 5.59   | 2.86  | 3.45E-04 | 9.14E-03 |
| 3 | 536 | F2-3 vs. L2-3 | F2-3 up | + | response to disaccharide                               | GO:0034285 | Signaling and response | Signaling | P | 72   | 13  | 2.89   | 4.49  | 2.23E-05 | 8.61E-04 |
| 3 | 537 | F2-3 vs. L2-3 | F2-3 up | + | response to endogenous stimulus                        | GO:0009719 | Signaling and response | Signaling | P | 1271 | 101 | 51.09  | 1.98  | 6.00E-10 | 6.65E-08 |
| 3 | 538 | F2-3 vs. L2-3 | F2-3 up | + | response to external biotic stimulus                   | GO:0043207 | Signaling and response | Signaling | P | 1097 | 106 | 44.09  | 2.4   | 2.23E-15 | 7.00E-13 |
| 3 | 539 | F2-3 vs. L2-3 | F2-3 up | + | response to external stimulus                          | GO:0009605 | Signaling and response | Signaling | P | 1513 | 143 | 60.82  | 2.35  | 9.13E-20 | 4.20E-17 |
| 3 | 540 | F2-3 vs. L2-3 | F2-3 up | + | response to extracellular stimulus                     | GO:0009991 | Signaling and response | Signaling | P | 262  | 25  | 10.53  | 2.37  | 1.56E-04 | 4.74E-03 |
| 3 | 541 | F2-3 vs. L2-3 | F2-3 up | + | response to far red light                              | GO:0010218 | Signaling and response | Signaling | P | 43   | 7   | 1.73   | 4.05  | 2.95E-03 | 4.92E-02 |
| 3 | 542 | F2-3 vs. L2-3 | F2-3 up | + | response to hormone                                    | GO:0009725 | Signaling and response | Signaling | P | 1241 | 101 | 49.88  | 2.02  | 1.50E-10 | 1.83E-08 |
| 3 | 543 | F2-3 vs. L2-3 | F2-3 up | + | response to inorganic substance                        | GO:0010035 | Signaling and response | Signaling | P | 914  | 104 | 36.74  | 2.83  | 1.33E-19 | 5.68E-17 |
| 3 | 544 | F2-3 vs. L2-3 | F2-3 up | + | response to jasmonic acid                              | GO:0009753 | Signaling and response | Signaling | P | 175  | 30  | 7.03   | 4.26  | 3.88E-10 | 4.55E-08 |
| 3 | 545 | F2-3 vs. L2-3 | F2-3 up | + | response to karrikin                                   | GO:0080167 | Signaling and response | Signaling | P | 128  | 25  | 5.15   | 4.86  | 1.08E-09 | 1.13E-07 |
| 3 | 546 | F2-3 vs. L2-3 | F2-3 up | + | response to light stimulus                             | GO:0009416 | Signaling and response | Signaling | P | 713  | 72  | 28.66  | 2.51  | 1.33E-11 | 2.21E-09 |
| 3 | 547 | F2-3 vs. L2-3 | F2-3 up | + | response to lipid                                      | GO:0033993 | Signaling and response | Signaling | P | 672  | 53  | 27.01  | 1.96  | 1.33E-05 | 5.33E-04 |
| 3 | 548 | F2-3 vs. L2-3 | F2-3 up | + | response to metal ion                                  | GO:0010038 | Signaling and response | Signaling | P | 433  | 51  | 17.4   | 2.93  | 1.09E-10 | 1.42E-08 |
| 3 | 549 | F2-3 vs. L2-3 | F2-3 up | + | response to nitrate                                    | GO:0010167 | Signaling and response | Signaling | P | 26   | 6   | 1.05   | 5.74  | 1.26E-03 | 2.58E-02 |
| 3 | 550 | F2-3 vs. L2-3 | F2-3 up | + | response to nitrogen compound                          | GO:1901698 | Signaling and response | Signaling | P | 301  | 29  | 12.1   | 2.4   | 3.99E-05 | 1.42E-03 |
| 3 | 551 | F2-3 vs. L2-3 | F2-3 up | + | response to organic cyclic compound                    | GO:0014070 | Signaling and response | Signaling | P | 280  | 24  | 11.25  | 2.13  | 1.33E-03 | 2.67E-02 |
| 3 | 552 | F2-3 vs. L2-3 | F2-3 up | + | response to organic substance                          | GO:0010033 | Signaling and response | Signaling | P | 1705 | 142 | 68.53  | 2.07  | 3.37E-15 | 8.77E-13 |
| 3 | 553 | F2-3 vs. L2-3 | F2-3 up | + | response to oxygen levels                              | GO:0070482 | Signaling and response | Signaling | P | 267  | 22  | 10.73  | 2.05  | 2.93E-03 | 4.94E-02 |
| 3 | 554 | F2-3 vs. L2-3 | F2-3 up | + | response to oxygen-containing compound                 | GO:1901700 | Signaling and response | Signaling | P | 1514 | 144 | 60.86  | 2.37  | 4.52E-20 | 2.46E-17 |
| 3 | 555 | F2-3 vs. L2-3 | F2-3 up | + | response to stimulus                                   | GO:0050896 | Signaling and response | Signaling | P | 5578 | 396 | 224.21 | 1.77  | 1.66E-31 | 4.98E-28 |
| 3 | 556 | F2-3 vs. L2-3 | F2-3 up | + | response to sucrose                                    | GO:0009744 | Signaling and response | Signaling | P | 70   | 13  | 2.81   | 4.62  | 1.72E-05 | 6.75E-04 |
| 3 | 557 | F2-3 vs. L2-3 | F2-3 up | + | response to temperature stimulus                       | GO:0009266 | Signaling and response | Signaling | P | 617  | 60  | 24.8   | 2.42  | 3.24E-09 | 3.03E-07 |
| 3 | 558 | F2-3 vs. L2-3 | F2-3 up | + | response to UV                                         | GO:0009411 | Signaling and response | Signaling | P | 125  | 14  | 5.02   | 2.79  | 1.01E-03 | 2.26E-02 |
| 3 | 559 | F2-3 vs. L2-3 | F2-3 up | + | response to water                                      | GO:0009415 | Signaling and response | Signaling | P | 365  | 43  | 14.67  | 2.93  | 3.15E-09 | 2.99E-07 |
| 3 | 560 | F2-3 vs. L2-3 | F2-3 up | + | sterol biosynthetic process                            | GO:0016126 | Signaling and response | Signaling | P | 33   | 8   | 1.33   | 6.03  | 1.49E-04 | 4.56E-03 |
| 3 | 561 | F2-3 vs. L2-3 | F2-3 up | + | sterol metabolic process                               | GO:0016125 | Signaling and response | Signaling | P | 73   | 10  | 2.93   | 3.41  | 1.34E-03 | 2.68E-02 |
| 3 | 562 | F2-3 vs. L2-3 | F2-3 up | + | aging                                                  | GO:0007568 | Signaling and response | Stress    | P | 132  | 19  | 5.31   | 3.58  | 6.23E-06 | 2.76E-04 |
| 3 | 563 | F2-3 vs. L2-3 | F2-3 up | + | anion homeostasis                                      | GO:0055081 | Signaling and response | Stress    | P | 43   | 7   | 1.73   | 4.05  | 2.95E-03 | 4.96E-02 |
| 3 | 564 | F2-3 vs. L2-3 | F2-3 up | + | antioxidant activity                                   | GO:0016209 | Signaling and response | Stress    | F | 140  | 18  | 5.63   | 3.2   | 4.21E-05 | 3.08E-03 |
| 3 | 565 | F2-3 vs. L2-3 | F2-3 up | + | cation homeostasis                                     | GO:0055080 | Signaling and response | Stress    | P | 236  | 22  | 9.49   | 2.32  | 5.09E-04 | 1.25E-02 |
| 3 | 566 | F2-3 vs. L2-3 | F2-3 up | + | cellular homeostasis                                   | GO:0019725 | Signaling and response | Stress    | P | 275  | 25  | 11.05  | 2.26  | 3.77E-04 | 9.88E-03 |
| 3 | 567 | F2-3 vs. L2-3 | F2-3 up | + | cellular response to decreased oxygen levels           | GO:0036294 | Signaling and response | Stress    | P | 237  | 21  | 9.53   | 2.2   | 1.56E-03 | 3.01E-02 |
| 3 | 568 | F2-3 vs. L2-3 | F2-3 up | + | cellular response to hypoxia                           | GO:0071456 | Signaling and response | Stress    | P | 235  | 20  | 9.45   | 2.12  | 2.75E-03 | 4.81E-02 |
| 3 | 569 | F2-3 vs. L2-3 | F2-3 up | + | cellular response to light intensity                   | GO:0071484 | Signaling and response | Stress    | P | 12   | 5   | 0.48   | 10.37 | 3.58E-04 | 9.43E-03 |
| 3 | 570 | F2-3 vs. L2-3 | F2-3 up | + | cellular response to toxic substance                   | GO:0097237 | Signaling and response | Stress    | P | 40   | 7   | 1.61   | 4.35  | 2.06E-03 | 3.70E-02 |
| 3 | 571 | F2-3 vs. L2-3 | F2-3 up | + | chemical homeostasis                                   | GO:0048878 | Signaling and response | Stress    | P | 415  | 39  | 16.68  | 2.34  | 3.54E-06 | 1.72E-04 |
| 3 | 572 | F2-3 vs. L2-3 | F2-3 up | + | defense response                                       | GO:0006952 | Signaling and response | Stress    | P | 953  | 82  | 38.31  | 2.14  | 9.91E-10 | 1.06E-07 |
| 3 | 573 | F2-3 vs. L2-3 | F2-3 up | + | defense response to bacterium                          | GO:0042742 | Signaling and response | Stress    | P | 414  | 51  | 16.64  | 3.06  | 2.55E-11 | 4.13E-09 |
| 3 | 574 | F2-3 vs. L2-3 | F2-3 up | + | defense response to fungus                             | GO:0050832 | Signaling and response | Stress    | P | 252  | 24  | 10.13  | 2.37  | 2.18E-04 | 6.14E-03 |
| 3 | 575 | F2-3 vs. L2-3 | F2-3 up | + | defense response to Gram-negative bacterium            | GO:0050829 | Signaling and response | Stress    | P | 20   | 5   | 0.8    | 6.22  | 2.38E-03 | 4.20E-02 |
| 3 | 576 | F2-3 vs. L2-3 | F2-3 up | + | defense response to other organism                     | GO:0098542 | Signaling and response | Stress    | P | 807  | 71  | 32.44  | 2.19  | 6.28E-09 | 5.45E-07 |
| 3 | 577 | F2-3 vs. L2-3 | F2-3 up | + | defense response, incompatible interaction             | GO:0009814 | Signaling and response | Stress    | P | 181  | 18  | 7.28   | 2.47  | 1.14E-03 | 2.43E-02 |
| 3 | 578 | F2-3 vs. L2-3 | F2-3 up | + | detoxification                                         | GO:0098754 | Signaling and response | Stress    | P | 100  | 14  | 4.02   | 3.48  | 1.31E-04 | 4.07E-03 |
| 3 | 579 | F2-3 vs. L2-3 | F2-3 up | + | flavonoid biosynthetic process                         | GO:0009813 | Signaling and response | Stress    | P | 54   | 12  | 2.17   | 5.53  | 7.48E-06 | 3.24E-04 |
| 3 | 580 | F2-3 vs. L2-3 | F2-3 up | + | flavonoid metabolic process                            | GO:0009812 | Signaling and response | Stress    | P | 63   | 12  | 2.53   | 4.74  | 2.88E-05 | 1.07E-03 |
| 3 | 581 | F2-3 vs. L2-3 | F2-3 up | + | gibberellic acid homeostasis                           | GO:0010336 | Signaling and response | Stress    | P | 6    | 4   | 0.24   | 16.59 | 3.86E-04 | 1.01E-02 |

|   |     |               |         |   |                                                          |            |                        |               |   |      |     |        |      |          |          |
|---|-----|---------------|---------|---|----------------------------------------------------------|------------|------------------------|---------------|---|------|-----|--------|------|----------|----------|
| 3 | 582 | F2-3 vs. L2-3 | F2-3 up | + | glutathione metabolic process                            | GO:0006749 | Signaling and response | Stress        | P | 44   | 8   | 1.77   | 4.52 | 8.05E-04 | 1.87E-02 |
| 3 | 583 | F2-3 vs. L2-3 | F2-3 up | + | homeostatic process                                      | GO:0042592 | Signaling and response | Stress        | P | 537  | 48  | 21.58  | 2.22 | 1.13E-06 | 6.56E-05 |
| 3 | 584 | F2-3 vs. L2-3 | F2-3 up | + | inorganic ion homeostasis                                | GO:0098771 | Signaling and response | Stress        | P | 250  | 23  | 10.05  | 2.29 | 6.65E-04 | 1.57E-02 |
| 3 | 585 | F2-3 vs. L2-3 | F2-3 up | + | interspecies interaction between organisms               | GO:0044419 | Signaling and response | Stress        | P | 1125 | 107 | 45.22  | 2.37 | 4.70E-15 | 1.17E-12 |
| 3 | 586 | F2-3 vs. L2-3 | F2-3 up | + | ion homeostasis                                          | GO:0050801 | Signaling and response | Stress        | P | 290  | 29  | 11.66  | 2.49 | 2.35E-05 | 8.94E-04 |
| 3 | 587 | F2-3 vs. L2-3 | F2-3 up | + | monovalent inorganic cation homeostasis                  | GO:0055067 | Signaling and response | Stress        | P | 79   | 10  | 3.18   | 3.15 | 2.29E-03 | 4.08E-02 |
| 3 | 588 | F2-3 vs. L2-3 | F2-3 up | + | photoprotection                                          | GO:0010117 | Signaling and response | Stress        | P | 10   | 4   | 0.4    | 9.95 | 1.63E-03 | 3.11E-02 |
| 3 | 589 | F2-3 vs. L2-3 | F2-3 up | + | reactive oxygen species metabolic process                | GO:0072593 | Signaling and response | Stress        | P | 69   | 12  | 2.77   | 4.33 | 6.31E-05 | 2.10E-03 |
| 3 | 590 | F2-3 vs. L2-3 | F2-3 up | + | response to abscisic acid                                | GO:0009737 | Signaling and response | Stress        | P | 497  | 39  | 19.98  | 1.95 | 1.62E-04 | 4.86E-03 |
| 3 | 591 | F2-3 vs. L2-3 | F2-3 up | + | response to alcohol                                      | GO:0097305 | Signaling and response | Stress        | P | 501  | 39  | 20.14  | 1.94 | 2.53E-04 | 6.97E-03 |
| 3 | 592 | F2-3 vs. L2-3 | F2-3 up | + | response to cold                                         | GO:0009409 | Signaling and response | Stress        | P | 415  | 52  | 16.68  | 3.12 | 9.22E-12 | 1.57E-09 |
| 3 | 593 | F2-3 vs. L2-3 | F2-3 up | + | response to decreased oxygen levels                      | GO:0036293 | Signaling and response | Stress        | P | 265  | 22  | 10.65  | 2.07 | 2.82E-03 | 4.86E-02 |
| 3 | 594 | F2-3 vs. L2-3 | F2-3 up | + | response to desiccation                                  | GO:0009269 | Signaling and response | Stress        | P | 24   | 6   | 0.96   | 6.22 | 8.79E-04 | 1.98E-02 |
| 3 | 595 | F2-3 vs. L2-3 | F2-3 up | + | response to fungus                                       | GO:0009620 | Signaling and response | Stress        | P | 350  | 37  | 14.07  | 2.63 | 6.74E-07 | 4.53E-05 |
| 3 | 596 | F2-3 vs. L2-3 | F2-3 up | + | response to high light intensity                         | GO:0009644 | Signaling and response | Stress        | P | 60   | 9   | 2.41   | 3.73 | 1.31E-03 | 2.66E-02 |
| 3 | 597 | F2-3 vs. L2-3 | F2-3 up | + | response to nematode                                     | GO:0009624 | Signaling and response | Stress        | P | 82   | 11  | 3.3    | 3.34 | 9.20E-04 | 2.07E-02 |
| 3 | 598 | F2-3 vs. L2-3 | F2-3 up | + | response to osmotic stress                               | GO:0006970 | Signaling and response | Stress        | P | 528  | 43  | 21.22  | 2.03 | 3.74E-05 | 1.34E-03 |
| 3 | 599 | F2-3 vs. L2-3 | F2-3 up | + | response to other organism                               | GO:0051707 | Signaling and response | Stress        | P | 1097 | 106 | 44.09  | 2.4  | 2.23E-15 | 6.65E-13 |
| 3 | 600 | F2-3 vs. L2-3 | F2-3 up | + | response to oxidative stress                             | GO:0006979 | Signaling and response | Stress        | P | 460  | 43  | 18.49  | 2.33 | 1.66E-06 | 8.92E-05 |
| 3 | 601 | F2-3 vs. L2-3 | F2-3 up | + | response to ozone                                        | GO:0010193 | Signaling and response | Stress        | P | 33   | 8   | 1.33   | 6.03 | 1.49E-04 | 4.54E-03 |
| 3 | 602 | F2-3 vs. L2-3 | F2-3 up | + | response to radiation                                    | GO:0009314 | Signaling and response | Stress        | P | 738  | 72  | 29.66  | 2.43 | 5.78E-11 | 8.04E-09 |
| 3 | 603 | F2-3 vs. L2-3 | F2-3 up | + | response to reactive oxygen species                      | GO:0000302 | Signaling and response | Stress        | P | 160  | 18  | 6.43   | 2.8  | 1.96E-04 | 5.62E-03 |
| 3 | 604 | F2-3 vs. L2-3 | F2-3 up | + | response to salt stress                                  | GO:0009651 | Signaling and response | Stress        | P | 447  | 36  | 17.97  | 2    | 1.84E-04 | 5.41E-03 |
| 3 | 605 | F2-3 vs. L2-3 | F2-3 up | + | response to stress                                       | GO:0006950 | Signaling and response | Stress        | P | 3106 | 246 | 124.85 | 1.97 | 6.29E-24 | 6.27E-21 |
| 3 | 606 | F2-3 vs. L2-3 | F2-3 up | + | response to toxic substance                              | GO:0009636 | Signaling and response | Stress        | P | 120  | 17  | 4.82   | 3.52 | 2.27E-05 | 8.69E-04 |
| 3 | 607 | F2-3 vs. L2-3 | F2-3 up | + | response to UV-B                                         | GO:0010224 | Signaling and response | Stress        | P | 73   | 10  | 2.93   | 3.41 | 1.34E-03 | 2.67E-02 |
| 3 | 608 | F2-3 vs. L2-3 | F2-3 up | + | response to water deprivation                            | GO:0009414 | Signaling and response | Stress        | P | 356  | 43  | 14.31  | 3    | 1.60E-09 | 1.59E-07 |
| 3 | 609 | F2-3 vs. L2-3 | F2-3 up | + | response to wounding                                     | GO:0009611 | Signaling and response | Stress        | P | 227  | 43  | 9.12   | 4.71 | 2.98E-15 | 8.10E-13 |
| 3 | 610 | F2-3 vs. L2-3 | F2-3 up | + | toxin metabolic process                                  | GO:0009404 | Signaling and response | Stress        | P | 59   | 9   | 2.37   | 3.8  | 1.18E-03 | 2.49E-02 |
| 3 | 611 | F2-3 vs. L2-3 | F2-3 up | - | gene expression                                          | GO:0010467 | Regulation             | Transcription | P | 1608 | 31  | 64.63  | 0.48 | 4.56E-06 | 2.17E-04 |
| 3 | 612 | F2-3 vs. L2-3 | F2-3 up | - | regulation of gene expression                            | GO:0010468 | Regulation             | Transcription | P | 2679 | 77  | 107.68 | 0.72 | 1.77E-03 | 3.32E-02 |
| 3 | 613 | F2-3 vs. L2-3 | F2-3 up | - | regulation of nucleic acid-templated transcription       | GO:1903506 | Regulation             | Transcription | P | 2184 | 60  | 87.79  | 0.68 | 1.67E-03 | 3.17E-02 |
| 3 | 614 | F2-3 vs. L2-3 | F2-3 up | - | regulation of RNA biosynthetic process                   | GO:2001141 | Regulation             | Transcription | P | 2186 | 60  | 87.87  | 0.68 | 1.67E-03 | 3.16E-02 |
| 3 | 615 | F2-3 vs. L2-3 | F2-3 up | - | regulation of transcription, DNA-templated               | GO:0006355 | Regulation             | Transcription | P | 2184 | 60  | 87.79  | 0.68 | 1.67E-03 | 3.18E-02 |
| 3 | 616 | F2-3 vs. L2-3 | F2-3 up | - | RNA modification                                         | GO:0009451 | Regulation             | Transcription | P | 283  | 2   | 11.38  | 0.18 | 1.76E-03 | 3.30E-02 |
| 3 | 617 | F2-3 vs. L2-3 | F2-3 up | - | ribonucleoprotein complex                                | GO:1990904 | Regulation             | Translation   | C | 677  | 7   | 27.21  | 0.26 | 1.17E-05 | 3.21E-04 |
| 3 | 618 | F2-3 vs. L2-3 | F2-3 up | - | RNA processing                                           | GO:0006396 | Regulation             | Translation   | P | 787  | 11  | 31.63  | 0.35 | 5.15E-05 | 1.77E-03 |
| 3 | 619 | F2-3 vs. L2-3 | F2-3 up | - | RNA splicing                                             | GO:0008380 | Regulation             | Translation   | P | 276  | 2   | 11.09  | 0.18 | 2.52E-03 | 4.43E-02 |
| 3 | 620 | F2-3 vs. L2-3 | F2-3 up | - | spliceosomal complex                                     | GO:0005681 | Regulation             | Translation   | C | 160  | 0   | 6.43   | <    | 3.20E-03 | 4.83E-02 |
| 3 | 621 | F2-3 vs. L2-3 | F2-3 up | + | mRNA binding                                             | GO:0003729 | Regulation             | Translation   | F | 1005 | 68  | 40.4   | 1.68 | 6.81E-05 | 4.66E-03 |
| 3 | 622 | F2-3 vs. L2-3 | F2-3 up | + | active ion transmembrane transporter activity            | GO:0022853 | Metabolism             | Transporters  | F | 215  | 30  | 8.64   | 3.47 | 2.72E-08 | 5.14E-06 |
| 3 | 623 | F2-3 vs. L2-3 | F2-3 up | + | active transmembrane transporter activity                | GO:0022804 | Metabolism             | Transporters  | F | 482  | 53  | 19.37  | 2.74 | 4.49E-10 | 1.44E-07 |
| 3 | 624 | F2-3 vs. L2-3 | F2-3 up | + | amino acid transmembrane transport                       | GO:0003333 | Metabolism             | Transporters  | P | 27   | 6   | 1.09   | 5.53 | 1.49E-03 | 2.88E-02 |
| 3 | 625 | F2-3 vs. L2-3 | F2-3 up | + | anion transmembrane transport                            | GO:0098656 | Metabolism             | Transporters  | P | 107  | 14  | 4.3    | 3.26 | 2.47E-04 | 6.83E-03 |
| 3 | 626 | F2-3 vs. L2-3 | F2-3 up | + | anion transmembrane transporter activity                 | GO:0008509 | Metabolism             | Transporters  | F | 336  | 32  | 13.51  | 2.37 | 2.63E-05 | 2.28E-03 |
| 3 | 627 | F2-3 vs. L2-3 | F2-3 up | + | anion transport                                          | GO:0006820 | Metabolism             | Transporters  | P | 283  | 32  | 11.38  | 2.81 | 7.25E-07 | 4.71E-05 |
| 3 | 628 | F2-3 vs. L2-3 | F2-3 up | + | ATPase-coupled cation transmembrane transporter activity | GO:0019829 | Metabolism             | Transporters  | F | 61   | 16  | 2.45   | 6.53 | 3.30E-08 | 5.90E-06 |
| 3 | 629 | F2-3 vs. L2-3 | F2-3 up | + | ATPase-coupled ion transmembrane transporter activity    | GO:0042625 | Metabolism             | Transporters  | F | 76   | 17  | 3.05   | 5.56 | 9.14E-08 | 1.47E-05 |
| 3 | 630 | F2-3 vs. L2-3 | F2-3 up | + | ATPase-coupled transmembrane transporter activity        | GO:0042626 | Metabolism             | Transporters  | F | 190  | 29  | 7.64   | 3.8  | 7.90E-09 | 2.31E-06 |
| 3 | 631 | F2-3 vs. L2-3 | F2-3 up | + | carboxylic acid transmembrane transport                  | GO:1905039 | Metabolism             | Transporters  | P | 55   | 10  | 2.21   | 4.52 | 1.85E-04 | 5.39E-03 |
| 3 | 632 | F2-3 vs. L2-3 | F2-3 up | + | carboxylic acid transmembrane transporter                | GO:0046943 | Metabolism             | Transporters  | F | 122  | 14  | 4.9    | 2.85 | 8.13E-04 | 3.90E-02 |
| 3 | 633 | F2-3 vs. L2-3 | F2-3 up | + | cation transmembrane transport                           | GO:0098655 | Metabolism             | Transporters  | P | 229  | 27  | 9.2    | 2.93 | 2.57E-06 | 1.30E-04 |
| 3 | 634 | F2-3 vs. L2-3 | F2-3 up | + | cation transmembrane transporter activity                | GO:0008324 | Metabolism             | Transporters  | F | 414  | 42  | 16.64  | 2.52 | 2.32E-07 | 3.24E-05 |
| 3 | 635 | F2-3 vs. L2-3 | F2-3 up | + | cation transport                                         | GO:0006812 | Metabolism             | Transporters  | P | 412  | 40  | 16.56  | 2.42 | 1.48E-06 | 8.18E-05 |
| 3 | 636 | F2-3 vs. L2-3 | F2-3 up | + | cytoplasmic vesicle                                      | GO:0031410 | Metabolism             | Transporters  | C | 720  | 55  | 28.94  | 1.9  | 1.69E-05 | 4.51E-04 |
| 3 | 637 | F2-3 vs. L2-3 | F2-3 up | + | endosome                                                 | GO:0005768 | Metabolism             | Transporters  | C | 411  | 31  | 16.52  | 1.88 | 1.62E-03 | 2.68E-02 |
| 3 | 638 | F2-3 vs. L2-3 | F2-3 up | + | export across plasma membrane                            | GO:0140115 | Metabolism             | Transporters  | P | 15   | 5   | 0.6    | 8.29 | 8.15E-04 | 1.88E-02 |
| 3 | 639 | F2-3 vs. L2-3 | F2-3 up | + | inorganic anion transport                                | GO:0015698 | Metabolism             | Transporters  | P | 108  | 14  | 4.34   | 3.22 | 2.69E-04 | 7.34E-03 |
| 3 | 640 | F2-3 vs. L2-3 | F2-3 up | + | inorganic cation transmembrane transport                 | GO:0098662 | Metabolism             | Transporters  | P | 223  | 26  | 8.96   | 2.9  | 4.71E-06 | 2.20E-04 |

|   |     |               |         |   |                                                                   |            |             |               |   |       |     |        |  |  |  |  |  |       |          |          |
|---|-----|---------------|---------|---|-------------------------------------------------------------------|------------|-------------|---------------|---|-------|-----|--------|--|--|--|--|--|-------|----------|----------|
| 3 |     | F2-3 vs. L2-3 | F2-3 up | + | inorganic cation transmembrane transporter activity               | GO:0022890 |             |               |   |       |     |        |  |  |  |  |  | 2.47  | 1.32E-06 | 1.51E-04 |
|   | 641 |               |         |   |                                                                   |            | Metabolism  | Transporters  | F | 382   | 38  | 15.35  |  |  |  |  |  |       |          |          |
| 3 | 642 | F2-3 vs. L2-3 | F2-3 up | + | inorganic ion transmembrane transport                             | GO:0098660 | Metabolism  | Transporters  | P | 244   | 29  | 9.81   |  |  |  |  |  | 2.96  | 9.57E-07 | 5.78E-05 |
| 3 |     | F2-3 vs. L2-3 | F2-3 up | + | inorganic molecular entity transmembrane transporter activity     | GO:0015318 |             |               |   |       |     |        |  |  |  |  |  | 2.62  | 4.27E-12 | 2.74E-09 |
|   | 643 |               |         |   |                                                                   |            | Metabolism  | Transporters  | F | 664   | 70  | 26.69  |  |  |  |  |  |       |          |          |
| 3 | 644 | F2-3 vs. L2-3 | F2-3 up | + | ion transmembrane transport                                       | GO:0034220 | Metabolism  | Transporters  | P | 330   | 41  | 13.26  |  |  |  |  |  | 3.09  | 1.83E-09 | 1.79E-07 |
| 3 | 645 | F2-3 vs. L2-3 | F2-3 up | + | ion transmembrane transporter activity                            | GO:0015075 | Metabolism  | Transporters  | F | 718   | 69  | 28.86  |  |  |  |  |  | 2.39  | 3.80E-10 | 1.36E-07 |
| 3 |     | F2-3 vs. L2-3 | F2-3 up | + | ion transmembrane transporter activity, phosphorylative mechanism | GO:0015662 |             |               |   |       |     |        |  |  |  |  |  | 4.98  | 9.27E-05 | 6.08E-03 |
|   | 646 |               |         |   |                                                                   |            | Metabolism  | Transporters  | F | 50    | 10  | 2.01   |  |  |  |  |  |       |          |          |
| 3 | 647 | F2-3 vs. L2-3 | F2-3 up | + | ion transport                                                     | GO:0006811 | Metabolism  | Transporters  | P | 673   | 71  | 27.05  |  |  |  |  |  | 2.62  | 2.89E-12 | 5.58E-10 |
| 3 |     | F2-3 vs. L2-3 | F2-3 up | + | monovalent inorganic cation transmembrane transporter activity    | GO:0015077 |             |               |   |       |     |        |  |  |  |  |  | 2.94  | 3.77E-06 | 4.04E-04 |
|   | 648 |               |         |   |                                                                   |            | Metabolism  | Transporters  | F | 220   | 26  | 8.84   |  |  |  |  |  |       |          |          |
| 3 | 649 | F2-3 vs. L2-3 | F2-3 up | + | monovalent inorganic cation transport                             | GO:0015672 | Metabolism  | Transporters  | P | 170   | 20  | 6.83   |  |  |  |  |  | 2.93  | 5.07E-05 | 1.75E-03 |
| 3 | 650 | F2-3 vs. L2-3 | F2-3 up | + | nitrate transport                                                 | GO:0015706 | Metabolism  | Transporters  | P | 43    | 7   | 1.73   |  |  |  |  |  | 4.05  | 2.95E-03 | 4.95E-02 |
| 3 | 651 | F2-3 vs. L2-3 | F2-3 up | + | organic acid transmembrane transport                              | GO:1903825 | Metabolism  | Transporters  | P | 57    | 10  | 2.29   |  |  |  |  |  | 4.36  | 2.39E-04 | 6.64E-03 |
| 3 | 652 | F2-3 vs. L2-3 | F2-3 up | + | organic acid transmembrane transporter activity                   | GO:0005342 | Metabolism  | Transporters  | F | 122   | 14  | 4.9    |  |  |  |  |  | 2.85  | 8.13E-04 | 3.84E-02 |
| 3 | 653 | F2-3 vs. L2-3 | F2-3 up | + | organic anion transmembrane transporter                           | GO:0008514 | Metabolism  | Transporters  | F | 200   | 20  | 8.04   |  |  |  |  |  | 2.49  | 5.37E-04 | 2.79E-02 |
| 3 | 654 | F2-3 vs. L2-3 | F2-3 up | + | organic anion transport                                           | GO:0015711 | Metabolism  | Transporters  | P | 164   | 18  | 6.59   |  |  |  |  |  | 2.73  | 2.59E-04 | 7.10E-03 |
| 3 | 655 | F2-3 vs. L2-3 | F2-3 up | + | phloem transport                                                  | GO:0010233 | Metabolism  | Transporters  | P | 21    | 6   | 0.84   |  |  |  |  |  | 7.11  | 4.84E-04 | 1.22E-02 |
| 3 | 656 | F2-3 vs. L2-3 | F2-3 up | + | plasmodesma                                                       | GO:0009506 | Metabolism  | Transporters  | C | 944   | 61  | 37.94  |  |  |  |  |  | 1.61  | 5.85E-04 | 1.19E-02 |
| 3 | 657 | F2-3 vs. L2-3 | F2-3 up | + | primary active transmembrane transporter                          | GO:0015399 | Metabolism  | Transporters  | F | 213   | 29  | 8.56   |  |  |  |  |  | 3.39  | 7.42E-08 | 1.25E-05 |
| 3 | 658 | F2-3 vs. L2-3 | F2-3 up | + | proton transmembrane transporter activity                         | GO:0015078 | Metabolism  | Transporters  | F | 166   | 24  | 6.67   |  |  |  |  |  | 3.6   | 3.67E-07 | 4.91E-05 |
| 3 |     | F2-3 vs. L2-3 | F2-3 up | + | secondary active transmembrane transporter activity               | GO:0015291 |             |               |   |       |     |        |  |  |  |  |  | 2.15  | 1.06E-03 | 4.66E-02 |
|   | 659 |               |         |   |                                                                   |            | Metabolism  | Transporters  | F | 266   | 23  | 10.69  |  |  |  |  |  |       |          |          |
| 3 | 660 | F2-3 vs. L2-3 | F2-3 up | + | secretory vesicle                                                 | GO:0099503 | Metabolism  | Transporters  | C | 170   | 22  | 6.83   |  |  |  |  |  | 3.22  | 5.65E-06 | 1.73E-04 |
| 3 | 661 | F2-3 vs. L2-3 | F2-3 up | + | trans-Golgi network                                               | GO:0005802 | Metabolism  | Transporters  | C | 302   | 33  | 12.14  |  |  |  |  |  | 2.72  | 9.78E-07 | 3.28E-05 |
| 3 | 662 | F2-3 vs. L2-3 | F2-3 up | + | transmembrane transport                                           | GO:0055085 | Metabolism  | Transporters  | P | 859   | 85  | 34.53  |  |  |  |  |  | 2.46  | 4.72E-13 | 1.01E-10 |
| 3 | 663 | F2-3 vs. L2-3 | F2-3 up | + | transmembrane transporter activity                                | GO:0022857 | Metabolism  | Transporters  | F | 1242  | 115 | 49.92  |  |  |  |  |  | 2.3   | 2.53E-15 | 2.03E-12 |
| 3 | 664 | F2-3 vs. L2-3 | F2-3 up | + | transport                                                         | GO:0006810 | Metabolism  | Transporters  | P | 2261  | 145 | 90.88  |  |  |  |  |  | 1.6   | 6.98E-08 | 5.35E-06 |
| 3 | 665 | F2-3 vs. L2-3 | F2-3 up | + | transporter activity                                              | GO:0005215 | Metabolism  | Transporters  | F | 1287  | 119 | 51.73  |  |  |  |  |  | 2.3   | 7.37E-16 | 7.90E-13 |
| 3 | 666 | F2-3 vs. L2-3 | F2-3 up | + | vascular transport                                                | GO:0010232 | Metabolism  | Transporters  | P | 21    | 6   | 0.84   |  |  |  |  |  | 7.11  | 4.84E-04 | 1.22E-02 |
| 3 | 667 | F2-3 vs. L2-3 | F2-3 up | + | vesicle                                                           | GO:0031982 | Metabolism  | Transporters  | C | 817   | 61  | 32.84  |  |  |  |  |  | 1.86  | 1.08E-05 | 3.11E-04 |
| 3 | 668 | F2-3 vs. L2-3 | L2-3 up | + | primary metabolic process                                         | GO:0044238 | Metabolism  | Bioenergetics | P | 7219  | 202 | 139.03 |  |  |  |  |  | 1.45  | 3.47E-09 | 2.31E-06 |
| 3 | 669 | F2-3 vs. L2-3 | L2-3 up | + | protein-containing complex                                        | GO:0032991 | Metabolism  | Catabolism    | C | 2958  | 114 | 56.97  |  |  |  |  |  | 2     | 1.42E-12 | 1.48E-09 |
| 3 | 670 | F2-3 vs. L2-3 | L2-3 up | + | cell cycle                                                        | GO:0007049 | Development | Cell division | P | 458   | 24  | 8.82   |  |  |  |  |  | 2.72  | 1.90E-05 | 2.58E-03 |
| 3 | 671 | F2-3 vs. L2-3 | L2-3 up | + | cell cycle phase transition                                       | GO:0044770 | Development | Cell division | P | 49    | 7   | 0.94   |  |  |  |  |  | 7.42  | 8.60E-05 | 8.43E-03 |
| 3 | 672 | F2-3 vs. L2-3 | L2-3 up | + | cell cycle process                                                | GO:0022402 | Development | Cell division | P | 421   | 23  | 8.11   |  |  |  |  |  | 2.84  | 1.51E-05 | 2.32E-03 |
| 3 | 673 | F2-3 vs. L2-3 | L2-3 up | + | chromosome                                                        | GO:0005694 | Development | Cell division | C | 545   | 25  | 10.5   |  |  |  |  |  | 2.38  | 1.17E-04 | 6.42E-03 |
| 3 |     | F2-3 vs. L2-3 | L2-3 up | + | cyclin-dependent protein kinase holoenzyme complex                | GO:0000307 |             |               |   |       |     |        |  |  |  |  |  | 5.86  | 3.24E-04 | 1.12E-02 |
|   | 674 |               |         |   |                                                                   |            | Development | Cell division | C | 62    | 7   | 1.19   |  |  |  |  |  |       |          |          |
| 3 | 675 | F2-3 vs. L2-3 | L2-3 up | + | DNA repair                                                        | GO:0006281 | Development | Cell division | P | 315   | 17  | 6.07   |  |  |  |  |  | 2.8   | 2.20E-04 | 1.75E-02 |
| 3 | 676 | F2-3 vs. L2-3 | L2-3 up | + | DNA replication                                                   | GO:0006260 | Development | Cell division | P | 125   | 11  | 2.41   |  |  |  |  |  | 4.57  | 5.75E-05 | 6.25E-03 |
| 3 | 677 | F2-3 vs. L2-3 | L2-3 up | + | DNA-dependent DNA replication                                     | GO:0006261 | Development | Cell division | P | 113   | 10  | 2.18   |  |  |  |  |  | 4.6   | 1.19E-04 | 1.04E-02 |
| 3 | 678 | F2-3 vs. L2-3 | L2-3 up | + | mitotic cell cycle                                                | GO:0000278 | Development | Cell division | P | 244   | 15  | 4.7    |  |  |  |  |  | 3.19  | 1.36E-04 | 1.18E-02 |
| 3 | 679 | F2-3 vs. L2-3 | L2-3 up | + | mitotic cell cycle phase transition                               | GO:0044772 | Development | Cell division | P | 48    | 7   | 0.92   |  |  |  |  |  | 7.57  | 7.65E-05 | 7.62E-03 |
| 3 | 680 | F2-3 vs. L2-3 | L2-3 up | + | mitotic cell cycle process                                        | GO:1903047 | Development | Cell division | P | 203   | 14  | 3.91   |  |  |  |  |  | 3.58  | 7.25E-05 | 7.34E-03 |
| 3 | 681 | F2-3 vs. L2-3 | L2-3 up | + | nuclear origin of replication recognition complex                 | GO:0005664 | Development | Cell division | C | 7     | 3   | 0.13   |  |  |  |  |  | 22.25 | 7.29E-04 | 2.11E-02 |
| 3 | 682 | F2-3 vs. L2-3 | L2-3 up | + | nucleic acid metabolic process                                    | GO:0090304 | Development | Cell division | P | 1705  | 66  | 32.84  |  |  |  |  |  | 2.01  | 1.71E-07 | 7.31E-05 |
| 3 |     | F2-3 vs. L2-3 | L2-3 up | + | nucleobase-containing compound metabolic process                  | GO:0006139 |             |               |   |       |     |        |  |  |  |  |  | 1.89  | 1.65E-07 | 7.58E-05 |
|   | 683 |               |         |   |                                                                   |            | Development | Cell division | P | 2093  | 76  | 40.31  |  |  |  |  |  |       |          |          |
| 3 | 684 | F2-3 vs. L2-3 | L2-3 up | + | origin recognition complex                                        | GO:0000808 | Development | Cell division | C | 7     | 3   | 0.13   |  |  |  |  |  | 22.25 | 7.29E-04 | 2.00E-02 |
| 3 | 685 | F2-3 vs. L2-3 | L2-3 up | + | regulation of cell cycle                                          | GO:0051726 | Development | Cell division | P | 241   | 17  | 4.64   |  |  |  |  |  | 3.66  | 9.58E-06 | 1.85E-03 |
| 3 | 686 | F2-3 vs. L2-3 | L2-3 up | + | regulation of cell cycle phase transition                         | GO:1901987 | Development | Cell division | P | 53    | 8   | 1.02   |  |  |  |  |  | 7.84  | 1.88E-05 | 2.68E-03 |
| 3 | 687 | F2-3 vs. L2-3 | L2-3 up | + | regulation of cell cycle process                                  | GO:0010564 | Development | Cell division | P | 128   | 11  | 2.47   |  |  |  |  |  | 4.46  | 7.01E-05 | 7.23E-03 |
| 3 | 688 | F2-3 vs. L2-3 | L2-3 up | + | regulation of mitotic cell cycle                                  | GO:0007346 | Development | Cell division | P | 89    | 9   | 1.71   |  |  |  |  |  | 5.25  | 1.02E-04 | 9.22E-03 |
| 3 | 689 | F2-3 vs. L2-3 | L2-3 up | + | regulation of mitotic cell cycle phase transition                 | GO:1901990 | Development | Cell division | P | 50    | 8   | 0.96   |  |  |  |  |  | 8.31  | 1.29E-05 | 2.08E-03 |
| 3 | 690 | F2-3 vs. L2-3 | L2-3 up | + | RNA metabolic process                                             | GO:0016070 | Development | Cell division | P | 1294  | 47  | 24.92  |  |  |  |  |  | 1.89  | 5.01E-05 | 5.54E-03 |
| 3 | 691 | F2-3 vs. L2-3 | L2-3 up | + | anatomical structure development                                  | GO:0048856 | Development | Development   | P | 2842  | 83  | 54.73  |  |  |  |  |  | 1.52  | 1.76E-04 | 1.46E-02 |
| 3 | 692 | F2-3 vs. L2-3 | L2-3 up | + | cellular anatomical entity                                        | GO:0110165 | Development | Development   | C | 24430 | 499 | 470.49 |  |  |  |  |  | 1.06  | 2.61E-05 | 1.81E-03 |
| 3 | 693 | F2-3 vs. L2-3 | L2-3 up | + | cellular component assembly                                       | GO:0022607 | Development | Development   | P | 838   | 37  | 16.14  |  |  |  |  |  | 2.29  | 6.00E-06 | 1.38E-03 |
| 3 | 694 | F2-3 vs. L2-3 | L2-3 up | + | cellular component biogenesis                                     | GO:0044085 | Development | Development   | P | 1325  | 52  | 25.52  |  |  |  |  |  | 2.04  | 2.17E-06 | 6.19E-04 |
| 3 | 695 | F2-3 vs. L2-3 | L2-3 up | + | cellular component organization                                   | GO:0016043 | Development | Development   | P | 2405  | 74  | 46.32  |  |  |  |  |  | 1.6   | 9.99E-05 | 9.19E-03 |

|   |     |               |         |   |                                                 |            |             |             |   |       |     |        |      |          |          |
|---|-----|---------------|---------|---|-------------------------------------------------|------------|-------------|-------------|---|-------|-----|--------|------|----------|----------|
| 3 | 696 | F2-3 vs. L2-3 | L2-3 up | + | cellular component organization or biogenesis   | GO:0071840 | Development | Development | P | 2813  | 87  | 54.18  | 1.61 | 1.37E-05 | 2.15E-03 |
| 3 | 697 | F2-3 vs. L2-3 | L2-3 up | + | cellular process                                | GO:0009987 | Development | Development | P | 12008 | 310 | 231.26 | 1.34 | 1.26E-11 | 3.78E-08 |
| 3 | 698 | F2-3 vs. L2-3 | L2-3 up | + | chromosomal region                              | GO:0098687 | Development | Development | C | 64    | 6   | 1.23   | 4.87 | 2.09E-03 | 4.94E-02 |
| 3 | 699 | F2-3 vs. L2-3 | L2-3 up | + | cytoplasm                                       | GO:0005737 | Development | Development | C | 14837 | 328 | 285.74 | 1.15 | 2.48E-04 | 9.20E-03 |
| 3 | 700 | F2-3 vs. L2-3 | L2-3 up | + | cytosol                                         | GO:0005829 | Development | Development | C | 3241  | 101 | 62.42  | 1.62 | 1.79E-06 | 2.07E-04 |
| 3 | 701 | F2-3 vs. L2-3 | L2-3 up | + | developmental process                           | GO:0032502 | Development | Development | P | 2997  | 84  | 57.72  | 1.46 | 5.62E-04 | 3.87E-02 |
| 3 | 702 | F2-3 vs. L2-3 | L2-3 up | + | developmental process involved in reproduction  | GO:0003006 | Development | Development | P | 1437  | 48  | 27.67  | 1.73 | 3.68E-04 | 2.72E-02 |
| 3 | 703 | F2-3 vs. L2-3 | L2-3 up | + | embryo development                              | GO:0009790 | Development | Development | P | 566   | 24  | 10.9   | 2.2  | 5.57E-04 | 3.87E-02 |
| 3 | 704 | F2-3 vs. L2-3 | L2-3 up | + | embryo development ending in seed dormancy      | GO:0009793 | Development | Development | P | 541   | 24  | 10.42  | 2.3  | 2.39E-04 | 1.88E-02 |
| 3 | 705 | F2-3 vs. L2-3 | L2-3 up | + | fruit development                               | GO:0010154 | Development | Development | P | 749   | 30  | 14.42  | 2.08 | 2.50E-04 | 1.94E-02 |
| 3 | 706 | F2-3 vs. L2-3 | L2-3 up | + | intracellular anatomical structure              | GO:0005622 | Development | Development | C | 21464 | 462 | 413.37 | 1.12 | 7.79E-08 | 1.35E-05 |
| 3 | 707 | F2-3 vs. L2-3 | L2-3 up | + | intracellular membrane-bounded organelle        | GO:0043231 | Development | Development | C | 19384 | 413 | 373.31 | 1.11 | 1.30E-04 | 6.75E-03 |
| 3 | 708 | F2-3 vs. L2-3 | L2-3 up | + | intracellular non-membrane-bounded organelle    | GO:0043232 | Development | Development | C | 1755  | 75  | 33.8   | 2.22 | 2.24E-10 | 1.17E-07 |
| 3 | 709 | F2-3 vs. L2-3 | L2-3 up | + | intracellular organelle                         | GO:0043229 | Development | Development | C | 19690 | 425 | 379.21 | 1.12 | 6.35E-06 | 5.51E-04 |
| 3 | 710 | F2-3 vs. L2-3 | L2-3 up | + | intracellular organelle lumen                   | GO:0070013 | Development | Development | C | 1386  | 48  | 26.69  | 1.8  | 1.33E-04 | 6.57E-03 |
| 3 | 711 | F2-3 vs. L2-3 | L2-3 up | + | membrane-bounded organelle                      | GO:0043227 | Development | Development | C | 19546 | 415 | 376.43 | 1.1  | 1.76E-04 | 7.64E-03 |
| 3 | 712 | F2-3 vs. L2-3 | L2-3 up | + | membrane-enclosed lumen                         | GO:0031974 | Development | Development | C | 1386  | 48  | 26.69  | 1.8  | 1.33E-04 | 6.27E-03 |
| 3 | 713 | F2-3 vs. L2-3 | L2-3 up | + | multicellular organism development              | GO:0007275 | Development | Development | P | 2457  | 79  | 47.32  | 1.67 | 1.10E-05 | 1.93E-03 |
| 3 | 714 | F2-3 vs. L2-3 | L2-3 up | + | non-membrane-bounded organelle                  | GO:0043228 | Development | Development | C | 1755  | 75  | 33.8   | 2.22 | 2.24E-10 | 7.79E-08 |
| 3 | 715 | F2-3 vs. L2-3 | L2-3 up | + | nuclear chromosome                              | GO:0000228 | Development | Development | C | 369   | 17  | 7.11   | 2.39 | 1.80E-03 | 4.80E-02 |
| 3 | 716 | F2-3 vs. L2-3 | L2-3 up | + | nuclear lumen                                   | GO:0031981 | Development | Development | C | 1222  | 42  | 23.53  | 1.78 | 4.26E-04 | 1.34E-02 |
| 3 | 717 | F2-3 vs. L2-3 | L2-3 up | + | nucleus                                         | GO:0005634 | Development | Development | C | 10540 | 266 | 202.99 | 1.31 | 4.18E-08 | 8.70E-06 |
| 3 | 718 | F2-3 vs. L2-3 | L2-3 up | + | organelle                                       | GO:0043226 | Development | Development | C | 19739 | 425 | 380.15 | 1.12 | 9.66E-06 | 7.74E-04 |
| 3 | 719 | F2-3 vs. L2-3 | L2-3 up | + | organelle lumen                                 | GO:0043233 | Development | Development | C | 1386  | 48  | 26.69  | 1.8  | 1.33E-04 | 6.00E-03 |
| 3 | 720 | F2-3 vs. L2-3 | L2-3 up | + | plant organ development                         | GO:0099402 | Development | Development | P | 1009  | 40  | 19.43  | 2.06 | 3.75E-05 | 4.67E-03 |
| 3 | 721 | F2-3 vs. L2-3 | L2-3 up | + | plant organ morphogenesis                       | GO:1905392 | Development | Development | P | 413   | 20  | 7.95   | 2.51 | 2.50E-04 | 1.92E-02 |
| 3 | 722 | F2-3 vs. L2-3 | L2-3 up | + | plasma membrane                                 | GO:0005886 | Development | Development | C | 3534  | 93  | 68.06  | 1.37 | 2.07E-03 | 5.13E-02 |
| 3 | 723 | F2-3 vs. L2-3 | L2-3 up | + | post-embryonic development                      | GO:0009791 | Development | Development | P | 1482  | 51  | 28.54  | 1.79 | 9.64E-05 | 9.15E-03 |
| 3 | 724 | F2-3 vs. L2-3 | L2-3 up | + | reproductive structure development              | GO:0048608 | Development | Development | P | 1206  | 45  | 23.23  | 1.94 | 4.20E-05 | 4.83E-03 |
| 3 | 725 | F2-3 vs. L2-3 | L2-3 up | + | reproductive system development                 | GO:0061458 | Development | Development | P | 1208  | 45  | 23.26  | 1.93 | 4.29E-05 | 4.84E-03 |
| 3 | 726 | F2-3 vs. L2-3 | L2-3 up | + | seed development                                | GO:0048316 | Development | Development | P | 725   | 30  | 13.96  | 2.15 | 1.81E-04 | 1.47E-02 |
| 3 | 727 | F2-3 vs. L2-3 | L2-3 up | + | structural molecule activity                    | GO:0005198 | Development | Development | F | 443   | 27  | 8.53   | 3.16 | 3.88E-07 | 1.38E-04 |
| 3 | 728 | F2-3 vs. L2-3 | L2-3 up | + | system development                              | GO:0048731 | Development | Development | P | 1867  | 66  | 35.96  | 1.84 | 3.40E-06 | 8.85E-04 |
| 3 | 729 | F2-3 vs. L2-3 | L2-3 up | + | amide biosynthetic process                      | GO:0043604 | Metabolism  | Metabolism  | P | 591   | 29  | 11.38  | 2.55 | 8.67E-06 | 1.73E-03 |
| 3 | 730 | F2-3 vs. L2-3 | L2-3 up | + | binding                                         | GO:0005488 | Metabolism  | Metabolism  | F | 9843  | 271 | 189.56 | 1.43 | 9.17E-13 | 2.95E-09 |
| 3 | 731 | F2-3 vs. L2-3 | L2-3 up | + | biological_process                              | GO:0008150 | Metabolism  | Metabolism  | P | 21988 | 460 | 423.46 | 1.09 | 4.07E-05 | 4.87E-03 |
| 3 | 732 | F2-3 vs. L2-3 | L2-3 up | + | biosynthetic process                            | GO:0009058 | Metabolism  | Metabolism  | P | 2811  | 88  | 54.14  | 1.63 | 7.09E-06 | 1.51E-03 |
| 3 | 733 | F2-3 vs. L2-3 | L2-3 up | + | catalytic complex                               | GO:1902494 | Metabolism  | Metabolism  | C | 1168  | 42  | 22.49  | 1.87 | 1.99E-04 | 8.30E-03 |
| 3 | 734 | F2-3 vs. L2-3 | L2-3 up | + | cellular amide metabolic process                | GO:0043603 | Metabolism  | Metabolism  | P | 722   | 29  | 13.9   | 2.09 | 3.19E-04 | 2.38E-02 |
| 3 | 735 | F2-3 vs. L2-3 | L2-3 up | + | cellular aromatic compound metabolic process    | GO:0006725 | Metabolism  | Metabolism  | P | 2519  | 83  | 48.51  | 1.71 | 2.25E-06 | 6.11E-04 |
| 3 | 736 | F2-3 vs. L2-3 | L2-3 up | + | cellular biosynthetic process                   | GO:0044249 | Metabolism  | Metabolism  | P | 2583  | 81  | 49.75  | 1.63 | 1.78E-05 | 2.59E-03 |
| 3 | 737 | F2-3 vs. L2-3 | L2-3 up | + | cellular macromolecule biosynthetic process     | GO:0034645 | Metabolism  | Metabolism  | P | 1279  | 59  | 24.63  | 2.4  | 1.65E-09 | 1.41E-06 |
| 3 | 738 | F2-3 vs. L2-3 | L2-3 up | + | cellular macromolecule metabolic process        | GO:0044260 | Metabolism  | Metabolism  | P | 4426  | 147 | 85.24  | 1.72 | 2.58E-11 | 5.15E-08 |
| 3 | 739 | F2-3 vs. L2-3 | L2-3 up | + | cellular metabolic process                      | GO:0044237 | Metabolism  | Metabolism  | P | 7649  | 207 | 147.31 | 1.41 | 2.88E-08 | 1.44E-05 |
| 3 | 740 | F2-3 vs. L2-3 | L2-3 up | + | cellular nitrogen compound biosynthetic process | GO:0044271 | Metabolism  | Metabolism  | P | 1241  | 51  | 23.9   | 2.13 | 8.91E-07 | 2.96E-04 |
| 3 | 741 | F2-3 vs. L2-3 | L2-3 up | + | cellular nitrogen compound metabolic process    | GO:0034641 | Metabolism  | Metabolism  | P | 2872  | 106 | 55.31  | 1.92 | 1.26E-10 | 1.50E-07 |
| 3 | 742 | F2-3 vs. L2-3 | L2-3 up | + | cellular protein metabolic process              | GO:0044267 | Metabolism  | Metabolism  | P | 3388  | 100 | 65.25  | 1.53 | 1.89E-05 | 2.63E-03 |
| 3 | 743 | F2-3 vs. L2-3 | L2-3 up | + | cellular protein-containing complex assembly    | GO:0034622 | Metabolism  | Metabolism  | P | 474   | 25  | 9.13   | 2.74 | 1.15E-05 | 1.96E-03 |
| 3 | 744 | F2-3 vs. L2-3 | L2-3 up | + | DNA metabolic process                           | GO:0006259 | Metabolism  | Metabolism  | P | 448   | 21  | 8.63   | 2.43 | 3.89E-04 | 2.84E-02 |
| 3 | 745 | F2-3 vs. L2-3 | L2-3 up | + | heterocycle metabolic process                   | GO:0046483 | Metabolism  | Metabolism  | P | 2393  | 80  | 46.09  | 1.74 | 1.94E-06 | 5.81E-04 |
| 3 | 746 | F2-3 vs. L2-3 | L2-3 up | + | heterocyclic compound binding                   | GO:1901363 | Metabolism  | Metabolism  | F | 4765  | 147 | 91.77  | 1.6  | 4.14E-09 | 2.22E-06 |
| 3 | 747 | F2-3 vs. L2-3 | L2-3 up | + | macromolecule biosynthetic process              | GO:0009059 | Metabolism  | Metabolism  | P | 1334  | 61  | 25.69  | 2.37 | 1.68E-09 | 1.25E-06 |
| 3 | 748 | F2-3 vs. L2-3 | L2-3 up | + | macromolecule metabolic process                 | GO:0043170 | Metabolism  | Metabolism  | P | 5496  | 179 | 105.85 | 1.69 | 1.98E-13 | 1.19E-09 |
| 3 | 749 | F2-3 vs. L2-3 | L2-3 up | + | metabolic process                               | GO:0008152 | Metabolism  | Metabolism  | P | 8681  | 232 | 167.19 | 1.39 | 5.55E-09 | 3.32E-06 |
| 3 | 750 | F2-3 vs. L2-3 | L2-3 up | + | nitrogen compound metabolic process             | GO:0006807 | Metabolism  | Metabolism  | P | 6150  | 177 | 118.44 | 1.49 | 8.45E-09 | 4.59E-06 |
| 3 | 751 | F2-3 vs. L2-3 | L2-3 up | + | nucleic acid binding                            | GO:0003676 | Metabolism  | Metabolism  | F | 3299  | 118 | 63.53  | 1.86 | 6.59E-11 | 7.06E-08 |
| 3 | 752 | F2-3 vs. L2-3 | L2-3 up | + | organic cyclic compound binding                 | GO:0097159 | Metabolism  | Metabolism  | F | 4794  | 149 | 92.33  | 1.61 | 1.59E-09 | 1.28E-06 |
| 3 | 753 | F2-3 vs. L2-3 | L2-3 up | + | organic cyclic compound metabolic process       | GO:1901360 | Metabolism  | Metabolism  | P | 2607  | 88  | 50.21  | 1.75 | 3.34E-07 | 1.33E-04 |
| 3 | 754 | F2-3 vs. L2-3 | L2-3 up | + | organic substance biosynthetic process          | GO:1901576 | Metabolism  | Metabolism  | P | 2674  | 85  | 51.5   | 1.65 | 6.13E-06 | 1.36E-03 |
| 3 | 755 | F2-3 vs. L2-3 | L2-3 up | + | organic substance metabolic process             | GO:0071704 | Metabolism  | Metabolism  | P | 7851  | 217 | 151.2  | 1.44 | 1.46E-09 | 1.45E-06 |
| 3 | 756 | F2-3 vs. L2-3 | L2-3 up | + | organonitrogen compound biosynthetic process    | GO:1901566 | Metabolism  | Metabolism  | P | 1343  | 48  | 25.86  | 1.86 | 6.64E-05 | 6.96E-03 |
| 3 | 757 | F2-3 vs. L2-3 | L2-3 up | + | peptide metabolic process                       | GO:0006518 | Metabolism  | Metabolism  | P | 585   | 29  | 11.27  | 2.57 | 7.21E-06 | 1.49E-03 |



|   |     |               |         |   |                                                        |            |                        |                      |   |      |     |        |       |          |          |
|---|-----|---------------|---------|---|--------------------------------------------------------|------------|------------------------|----------------------|---|------|-----|--------|-------|----------|----------|
| 3 | 758 | F2-3 vs. L2-3 | L2-3 up | + | protein binding                                        | GO:0005515 | Metabolism             | Metabolism           | F | 5446 | 172 | 104.88 | 1.64  | 9.98E-12 | 1.60E-08 |
| 3 | 759 | F2-3 vs. L2-3 | L2-3 up | + | protein metabolic process                              | GO:0019538 | Metabolism             | Metabolism           | P | 3544 | 101 | 68.25  | 1.48  | 6.51E-05 | 6.95E-03 |
| 3 | 760 | F2-3 vs. L2-3 | L2-3 up | + | Sm-like protein family complex                         | GO:0120114 | Metabolism             | Metabolism           | C | 86   | 10  | 1.66   | 6.04  | 1.40E-05 | 1.04E-03 |
| 3 | 761 | F2-3 vs. L2-3 | L2-3 up | + | protein-containing complex assembly                    | GO:0065003 | Regulation             | Protein modification | P | 534  | 27  | 10.28  | 2.63  | 1.07E-05 | 1.93E-03 |
| 3 | 762 | F2-3 vs. L2-3 | L2-3 up | + | protein-containing complex subunit organization        | GO:0043933 | Regulation             | Protein modification | P | 609  | 27  | 11.73  | 2.3   | 9.65E-05 | 9.02E-03 |
| 3 | 763 | F2-3 vs. L2-3 | L2-3 up | + | negative regulation of biological process              | GO:0048519 | Regulation             | Regulation           | P | 1102 | 45  | 21.22  | 2.12  | 4.02E-06 | 1.00E-03 |
| 3 | 764 | F2-3 vs. L2-3 | L2-3 up | + | negative regulation of macromolecule metabolic process | GO:0010605 | Regulation             | Regulation           | P | 603  | 29  | 11.61  | 2.5   | 1.75E-05 | 2.61E-03 |
| 3 | 765 | F2-3 vs. L2-3 | L2-3 up | + | negative regulation of metabolic process               | GO:0009892 | Regulation             | Regulation           | P | 653  | 30  | 12.58  | 2.39  | 2.20E-05 | 2.87E-03 |
| 3 | 766 | F2-3 vs. L2-3 | L2-3 up | + | regulation of biological process                       | GO:0050789 | Regulation             | Regulation           | P | 5407 | 140 | 104.13 | 1.34  | 1.74E-04 | 1.47E-02 |
| 3 | 767 | F2-3 vs. L2-3 | L2-3 up | + | regulation of cellular amide metabolic process         | GO:0034248 | Regulation             | Regulation           | P | 119  | 9   | 2.29   | 3.93  | 7.50E-04 | 4.87E-02 |
| 3 | 768 | F2-3 vs. L2-3 | L2-3 up | + | regulation of macromolecule metabolic process          | GO:0060255 | Regulation             | Regulation           | P | 3058 | 89  | 58.89  | 1.51  | 9.45E-05 | 9.11E-03 |
| 3 | 769 | F2-3 vs. L2-3 | L2-3 up | + | regulation of meristem structural organization         | GO:0009934 | Regulation             | Regulation           | P | 22   | 6   | 0.42   | 14.16 | 1.17E-05 | 1.94E-03 |
| 3 | 770 | F2-3 vs. L2-3 | L2-3 up | + | regulation of metabolic process                        | GO:0019222 | Regulation             | Regulation           | P | 3325 | 92  | 64.04  | 1.44  | 4.63E-04 | 3.30E-02 |
| 3 | 771 | F2-3 vs. L2-3 | L2-3 up | + | multicellular organismal process                       | GO:0032501 | Signaling and response | Signaling            | P | 2741 | 81  | 52.79  | 1.53  | 1.39E-04 | 1.19E-02 |
| 3 | 772 | F2-3 vs. L2-3 | L2-3 up | + | protein kinase complex                                 | GO:1902911 | Signaling and response | Signaling            | C | 87   | 8   | 1.68   | 4.77  | 4.44E-04 | 1.36E-02 |
| 3 | 773 | F2-3 vs. L2-3 | L2-3 up | + | serine/threonine protein kinase complex                | GO:1902554 | Signaling and response | Signaling            | C | 79   | 8   | 1.52   | 5.26  | 2.44E-04 | 9.75E-03 |
| 3 | 774 | F2-3 vs. L2-3 | L2-3 up | + | cellular response to DNA damage stimulus               | GO:0006974 | Signaling and response | Stress               | P | 350  | 17  | 6.74   | 2.52  | 6.89E-04 | 4.63E-02 |
| 3 | 775 | F2-3 vs. L2-3 | L2-3 up | + | gene expression                                        | GO:0010467 | Regulation             | Transcription        | P | 1608 | 73  | 30.97  | 2.36  | 3.01E-11 | 4.50E-08 |
| 3 | 776 | F2-3 vs. L2-3 | L2-3 up | + | negative regulation of gene expression                 | GO:0010629 | Regulation             | Transcription        | P | 493  | 25  | 9.49   | 2.63  | 2.15E-05 | 2.85E-03 |
| 3 | 777 | F2-3 vs. L2-3 | L2-3 up | + | regulation of gene expression                          | GO:0010468 | Regulation             | Transcription        | P | 2679 | 80  | 51.59  | 1.55  | 1.17E-04 | 1.04E-02 |
| 3 | 778 | F2-3 vs. L2-3 | L2-3 up | + | RNA binding                                            | GO:0003723 | Regulation             | Transcription        | F | 1569 | 67  | 30.22  | 2.22  | 2.84E-09 | 1.83E-06 |
| 3 | 779 | F2-3 vs. L2-3 | L2-3 up | + | catalytic step 2 spliceosome                           | GO:0071013 | Regulation             | Translation          | C | 64   | 6   | 1.23   | 4.87  | 2.09E-03 | 5.05E-02 |
| 3 | 780 | F2-3 vs. L2-3 | L2-3 up | + | cytoplasmic ribonucleoprotein granule                  | GO:0036464 | Regulation             | Translation          | C | 84   | 8   | 1.62   | 4.95  | 3.57E-04 | 1.16E-02 |
| 3 | 781 | F2-3 vs. L2-3 | L2-3 up | + | cytoplasmic translation                                | GO:0002181 | Regulation             | Translation          | P | 72   | 7   | 1.39   | 5.05  | 7.41E-04 | 4.92E-02 |
| 3 | 782 | F2-3 vs. L2-3 | L2-3 up | + | cytosolic large ribosomal subunit                      | GO:0022625 | Regulation             | Translation          | C | 131  | 11  | 2.52   | 4.36  | 8.50E-05 | 4.92E-03 |
| 3 | 783 | F2-3 vs. L2-3 | L2-3 up | + | cytosolic ribosome                                     | GO:0022626 | Regulation             | Translation          | C | 303  | 20  | 5.84   | 3.43  | 4.11E-06 | 4.28E-04 |
| 3 | 784 | F2-3 vs. L2-3 | L2-3 up | + | cytosolic small ribosomal subunit                      | GO:0022627 | Regulation             | Translation          | C | 102  | 9   | 1.96   | 4.58  | 2.63E-04 | 9.45E-03 |
| 3 | 785 | F2-3 vs. L2-3 | L2-3 up | + | large ribosomal subunit                                | GO:0015934 | Regulation             | Translation          | C | 180  | 15  | 3.47   | 4.33  | 5.03E-06 | 4.76E-04 |
| 3 | 786 | F2-3 vs. L2-3 | L2-3 up | + | Lsm1-7-Pat1 complex                                    | GO:1990726 | Regulation             | Translation          | C | 7    | 3   | 0.13   | 22.25 | 7.29E-04 | 2.05E-02 |
| 3 | 787 | F2-3 vs. L2-3 | L2-3 up | + | mRNA binding                                           | GO:0003729 | Regulation             | Translation          | F | 1005 | 46  | 19.36  | 2.38  | 1.65E-07 | 7.58E-05 |
| 3 | 788 | F2-3 vs. L2-3 | L2-3 up | + | ncRNA metabolic process                                | GO:0034660 | Regulation             | Translation          | P | 455  | 21  | 8.76   | 2.4   | 4.32E-04 | 3.11E-02 |
| 3 | 789 | F2-3 vs. L2-3 | L2-3 up | + | ncRNA processing                                       | GO:0034470 | Regulation             | Translation          | P | 381  | 19  | 7.34   | 2.59  | 2.50E-04 | 1.89E-02 |
| 3 | 790 | F2-3 vs. L2-3 | L2-3 up | + | nuclear-transcribed mRNA catabolic process             | GO:0000956 | Regulation             | Translation          | P | 72   | 7   | 1.39   | 5.05  | 7.41E-04 | 4.87E-02 |
| 3 | 791 | F2-3 vs. L2-3 | L2-3 up | + | peptide biosynthetic process                           | GO:0043043 | Regulation             | Translation          | P | 518  | 29  | 9.98   | 2.91  | 7.51E-07 | 2.64E-04 |
| 3 | 792 | F2-3 vs. L2-3 | L2-3 up | + | posttranscriptional regulation of gene expression      | GO:0010608 | Regulation             | Translation          | P | 230  | 17  | 4.43   | 3.84  | 5.39E-06 | 1.29E-03 |
| 3 | 793 | F2-3 vs. L2-3 | L2-3 up | + | regulation of translation                              | GO:0006417 | Regulation             | Translation          | P | 116  | 9   | 2.23   | 4.03  | 6.32E-04 | 4.29E-02 |
| 3 | 794 | F2-3 vs. L2-3 | L2-3 up | + | ribonucleoprotein complex                              | GO:1990904 | Regulation             | Translation          | C | 677  | 36  | 13.04  | 2.76  | 1.15E-07 | 1.70E-05 |
| 3 | 795 | F2-3 vs. L2-3 | L2-3 up | + | ribonucleoprotein complex assembly                     | GO:0022618 | Regulation             | Translation          | P | 163  | 13  | 3.14   | 4.14  | 3.26E-05 | 4.15E-03 |
| 3 | 796 | F2-3 vs. L2-3 | L2-3 up | + | ribonucleoprotein complex biogenesis                   | GO:0022613 | Regulation             | Translation          | P | 447  | 26  | 8.61   | 3.02  | 1.45E-06 | 4.56E-04 |
| 3 | 797 | F2-3 vs. L2-3 | L2-3 up | + | ribonucleoprotein complex subunit organization         | GO:0071826 | Regulation             | Translation          | P | 166  | 13  | 3.2    | 4.07  | 3.89E-05 | 4.75E-03 |
| 3 | 798 | F2-3 vs. L2-3 | L2-3 up | + | ribonucleoprotein granule                              | GO:0035770 | Regulation             | Translation          | C | 84   | 8   | 1.62   | 4.95  | 3.57E-04 | 1.20E-02 |
| 3 | 799 | F2-3 vs. L2-3 | L2-3 up | + | ribosomal subunit                                      | GO:0044391 | Regulation             | Translation          | C | 316  | 25  | 6.09   | 4.11  | 9.99E-09 | 2.60E-06 |
| 3 | 800 | F2-3 vs. L2-3 | L2-3 up | + | ribosome                                               | GO:0005840 | Regulation             | Translation          | C | 399  | 25  | 7.68   | 3.25  | 6.50E-07 | 8.46E-05 |
| 3 | 801 | F2-3 vs. L2-3 | L2-3 up | + | ribosome assembly                                      | GO:0042255 | Regulation             | translation          | P | 90   | 8   | 1.73   | 4.62  | 5.48E-04 | 3.85E-02 |
| 3 | 802 | F2-3 vs. L2-3 | L2-3 up | + | ribosome biogenesis                                    | GO:0042254 | Regulation             | Translation          | P | 370  | 19  | 7.13   | 2.67  | 1.76E-04 | 1.44E-02 |
| 3 | 803 | F2-3 vs. L2-3 | L2-3 up | + | RNA processing                                         | GO:0006396 | Regulation             | Translation          | P | 787  | 35  | 15.16  | 2.31  | 1.02E-05 | 1.91E-03 |
| 3 | 804 | F2-3 vs. L2-3 | L2-3 up | + | small nuclear ribonucleoprotein complex                | GO:0030532 | Regulation             | Translation          | C | 78   | 9   | 1.5    | 5.99  | 3.98E-05 | 2.44E-03 |
| 3 | 805 | F2-3 vs. L2-3 | L2-3 up | + | small ribosomal subunit                                | GO:0015935 | Regulation             | Translation          | C | 136  | 10  | 2.62   | 3.82  | 4.77E-04 | 1.42E-02 |
| 3 | 806 | F2-3 vs. L2-3 | L2-3 up | + | spliceosomal snRNP complex                             | GO:0097525 | Regulation             | Translation          | C | 78   | 9   | 1.5    | 5.99  | 3.98E-05 | 2.59E-03 |
| 3 | 807 | F2-3 vs. L2-3 | L2-3 up | + | spliceosomal tri-snRNP complex                         | GO:0097526 | Regulation             | Translation          | C | 41   | 6   | 0.79   | 7.6   | 2.46E-04 | 9.49E-03 |
| 3 | 808 | F2-3 vs. L2-3 | L2-3 up | + | structural constituent of ribosome                     | GO:0003735 | Regulation             | Translation          | F | 325  | 23  | 6.26   | 3.67  | 2.53E-07 | 1.02E-04 |
| 3 | 809 | F2-3 vs. L2-3 | L2-3 up | + | translation                                            | GO:0006412 | Regulation             | Translation          | P | 513  | 29  | 9.88   | 2.94  | 6.23E-07 | 2.33E-04 |
| 3 | 810 | F2-3 vs. L2-3 | L2-3 up | + | U1 snRNP                                               | GO:0005685 | Regulation             | Translation          | C | 24   | 4   | 0.46   | 8.65  | 1.80E-03 | 4.57E-02 |
| 3 | 811 | F2-3 vs. L2-3 | L2-3 up | + | U12-type spliceosomal complex                          | GO:0005689 | Regulation             | Translation          | C | 24   | 4   | 0.46   | 8.65  | 1.80E-03 | 4.68E-02 |
| 4 | 812 | F2-3 vs. M2-3 | F2-3 up | + | aldehyde dehydrogenase (NAD+) activity                 | GO:0004029 | Metabolism             | Bioenergetics        | F | 12   | 4   | 0.27   | 14.86 | 3.38E-04 | 2.31E-02 |
| 4 | 813 | F2-3 vs. M2-3 | F2-3 up | + | aldehyde dehydrogenase [NAD(P)+] activity              | GO:0004030 | Metabolism             | Bioenergetics        | F | 12   | 4   | 0.27   | 14.86 | 3.38E-04 | 2.36E-02 |
| 4 | 814 | F2-3 vs. M2-3 | F2-3 up | + | carbohydrate biosynthetic process                      | GO:0016051 | Metabolism             | Bioenergetics        | P | 303  | 23  | 6.8    | 3.38  | 1.07E-06 | 2.00E-04 |
| 4 | 815 | F2-3 vs. M2-3 | F2-3 up | + | carbohydrate catabolic process                         | GO:0016052 | Metabolism             | Bioenergetics        | P | 234  | 21  | 5.25   | 4     | 2.55E-07 | 7.62E-05 |
| 4 | 816 | F2-3 vs. M2-3 | F2-3 up | + | carbohydrate metabolic process                         | GO:0005975 | Metabolism             | Bioenergetics        | P | 950  | 65  | 21.31  | 3.05  | 1.25E-14 | 3.75E-11 |
| 4 | 817 | F2-3 vs. M2-3 | F2-3 up | + | cellular carbohydrate biosynthetic process             | GO:0034637 | Metabolism             | Bioenergetics        | P | 213  | 14  | 4.78   | 2.93  | 5.30E-04 | 2.33E-02 |
| 4 | 818 | F2-3 vs. M2-3 | F2-3 up | + | cellular carbohydrate metabolic process                | GO:0044262 | Metabolism             | Bioenergetics        | P | 384  | 22  | 8.61   | 2.55  | 1.07E-04 | 6.88E-03 |

|   |     |               |         |   |                                                                                                                                                                                             |            |             |               |   |       |     |        |       |          |          |
|---|-----|---------------|---------|---|---------------------------------------------------------------------------------------------------------------------------------------------------------------------------------------------|------------|-------------|---------------|---|-------|-----|--------|-------|----------|----------|
| 4 | 819 | F2-3 vs. M2-3 | F2-3 up | + | disaccharide biosynthetic process                                                                                                                                                           | GO:0046351 | Metabolism  | Bioenergetics | P | 31    | 5   | 0.7    | 7.19  | 1.07E-03 | 3.55E-02 |
| 4 | 820 | F2-3 vs. M2-3 | F2-3 up | + | fatty acid derivative biosynthetic process                                                                                                                                                  | GO:1901570 | Metabolism  | Bioenergetics | P | 30    | 5   | 0.67   | 7.43  | 9.42E-04 | 3.29E-02 |
| 4 | 821 | F2-3 vs. M2-3 | F2-3 up | + | fatty acid derivative metabolic process                                                                                                                                                     | GO:1901568 | Metabolism  | Bioenergetics | P | 43    | 7   | 0.96   | 7.26  | 1.04E-04 | 6.77E-03 |
| 4 | 822 | F2-3 vs. M2-3 | F2-3 up | + | generation of precursor metabolites and energy                                                                                                                                              | GO:0006091 | Metabolism  | Bioenergetics | P | 378   | 23  | 8.48   | 2.71  | 3.16E-05 | 2.95E-03 |
| 4 | 823 | F2-3 vs. M2-3 | F2-3 up | + | gluconeogenesis                                                                                                                                                                             | GO:0006094 | Metabolism  | Bioenergetics | P | 23    | 5   | 0.52   | 9.69  | 3.24E-04 | 1.63E-02 |
| 4 | 824 | F2-3 vs. M2-3 | F2-3 up | + | glyceraldehyde-3-phosphate dehydrogenase (NAD+) (non-phosphorylating) activity                                                                                                              | GO:0043878 | Metabolism  | Bioenergetics | F | 8     | 4   | 0.18   | 22.29 | 9.87E-05 | 8.14E-03 |
| 4 | 825 | F2-3 vs. M2-3 | F2-3 up | + | hexose biosynthetic process                                                                                                                                                                 | GO:0019319 | Metabolism  | Bioenergetics | P | 26    | 5   | 0.58   | 8.57  | 5.30E-04 | 2.35E-02 |
| 4 | 826 | F2-3 vs. M2-3 | F2-3 up | + | monosaccharide biosynthetic process                                                                                                                                                         | GO:0046364 | Metabolism  | Bioenergetics | P | 48    | 8   | 1.08   | 7.43  | 2.88E-05 | 2.74E-03 |
| 4 | 827 | F2-3 vs. M2-3 | F2-3 up | + | oxidoreductase activity                                                                                                                                                                     | GO:0016491 | Metabolism  | Bioenergetics | F | 1458  | 84  | 32.71  | 2.57  | 1.38E-14 | 2.22E-11 |
| 4 | 828 | F2-3 vs. M2-3 | F2-3 up | + | oxidoreductase activity, acting on CH-OH group of donors                                                                                                                                    | GO:0016614 | Metabolism  | Bioenergetics | F | 201   | 14  | 4.51   | 3.1   | 3.07E-04 | 2.20E-02 |
| 4 | 829 | F2-3 vs. M2-3 | F2-3 up | + | oxidoreductase activity, acting on paired donors, with incorporation or reduction of molecular oxygen, reduced flavin or flavoprotein as one donor, and incorporation of one atom of oxygen | GO:0016712 | Metabolism  | Bioenergetics | F | 5     | 3   | 0.11   | 26.75 | 5.42E-04 | 3.42E-02 |
| 4 | 830 | F2-3 vs. M2-3 | F2-3 up | + | oxidoreductase activity, acting on the aldehyde or oxo group of donors                                                                                                                      | GO:0016903 | Metabolism  | Bioenergetics | F | 62    | 7   | 1.39   | 5.03  | 7.87E-04 | 4.44E-02 |
| 4 | 831 | F2-3 vs. M2-3 | F2-3 up | + | oxidoreductase activity, acting on the aldehyde or oxo group of donors, NAD or NADP as                                                                                                      | GO:0016620 | Metabolism  | Bioenergetics | F | 43    | 7   | 0.96   | 7.26  | 1.04E-04 | 8.17E-03 |
| 4 | 832 | F2-3 vs. M2-3 | F2-3 up | + | oxidoreductase activity, acting on the CH-OH group of donors, NAD or NADP as acceptor                                                                                                       | GO:0016616 | Metabolism  | Bioenergetics | F | 167   | 12  | 3.75   | 3.2   | 6.27E-04 | 3.80E-02 |
| 4 | 833 | F2-3 vs. M2-3 | F2-3 up | + | photorespiration                                                                                                                                                                            | GO:0009853 | Metabolism  | Bioenergetics | P | 42    | 6   | 0.94   | 6.37  | 6.11E-04 | 2.50E-02 |
| 4 | 834 | F2-3 vs. M2-3 | F2-3 up | + | polysaccharide metabolic process                                                                                                                                                            | GO:0005976 | Metabolism  | Bioenergetics | P | 419   | 31  | 9.4    | 3.3   | 2.54E-08 | 1.01E-05 |
| 4 | 835 | F2-3 vs. M2-3 | F2-3 up | + | proton transmembrane transport                                                                                                                                                              | GO:1902600 | Metabolism  | Bioenergetics | P | 95    | 11  | 2.13   | 5.16  | 2.19E-05 | 2.18E-03 |
| 4 | 836 | F2-3 vs. M2-3 | F2-3 up | + | phosphorylative mechanism                                                                                                                                                                   | GO:0008553 | Metabolism  | Bioenergetics | F | 20    | 6   | 0.45   | 13.37 | 1.72E-05 | 1.98E-03 |
| 4 | 837 | F2-3 vs. M2-3 | F2-3 up | + | pyrophosphate hydrolysis-driven proton transmembrane transporter activity                                                                                                                   | GO:0009678 | Metabolism  | Bioenergetics | F | 44    | 8   | 0.99   | 8.11  | 1.65E-05 | 1.96E-03 |
| 4 | 838 | F2-3 vs. M2-3 | F2-3 up | + | reductive pentose-phosphate cycle                                                                                                                                                           | GO:0019253 | Metabolism  | Bioenergetics | P | 14    | 4   | 0.31   | 12.74 | 5.50E-04 | 2.31E-02 |
| 4 | 839 | F2-3 vs. M2-3 | F2-3 up | + | sucrose biosynthetic process                                                                                                                                                                | GO:0005986 | Metabolism  | Bioenergetics | P | 14    | 5   | 0.31   | 15.92 | 4.51E-05 | 3.64E-03 |
| 4 | 840 | F2-3 vs. M2-3 | F2-3 up | + | sucrose metabolic process                                                                                                                                                                   | GO:0005985 | Metabolism  | Bioenergetics | P | 46    | 6   | 1.03   | 5.81  | 9.41E-04 | 3.37E-02 |
| 4 | 841 | F2-3 vs. M2-3 | F2-3 up | + | sugar-phosphatase activity                                                                                                                                                                  | GO:0050308 | Metabolism  | Bioenergetics | C | 15    | 4   | 0.34   | 11.89 | 6.84E-04 | 4.00E-02 |
| 4 | 842 | F2-3 vs. M2-3 | F2-3 up | - | modification-dependent macromolecule catabolic process                                                                                                                                      | GO:0043632 | Metabolism  | Catabolism    | P | 536   | 2   | 12.02  | 0.17  | 9.19E-04 | 3.31E-02 |
| 4 | 843 | F2-3 vs. M2-3 | F2-3 up | - | modification-dependent protein catabolic                                                                                                                                                    | GO:0019941 | Metabolism  | Catabolism    | P | 524   | 2   | 11.75  | 0.17  | 1.32E-03 | 4.07E-02 |
| 4 | 844 | F2-3 vs. M2-3 | F2-3 up | - | protein-containing complex                                                                                                                                                                  | GO:0032991 | Metabolism  | Catabolism    | C | 2958  | 40  | 66.35  | 0.6   | 3.57E-04 | 9.52E-03 |
| 4 | 845 | F2-3 vs. M2-3 | F2-3 up | + | alpha-amino acid catabolic process                                                                                                                                                          | GO:1901606 | Metabolism  | Catabolism    | P | 88    | 10  | 1.97   | 5.07  | 5.95E-05 | 4.34E-03 |
| 4 | 846 | F2-3 vs. M2-3 | F2-3 up | + | carboxylic acid catabolic process                                                                                                                                                           | GO:0046395 | Metabolism  | Catabolism    | P | 162   | 15  | 3.63   | 4.13  | 9.19E-06 | 1.22E-03 |
| 4 | 847 | F2-3 vs. M2-3 | F2-3 up | + | catabolic process                                                                                                                                                                           | GO:0009056 | Metabolism  | Catabolism    | P | 1469  | 60  | 32.95  | 1.82  | 1.35E-05 | 1.58E-03 |
| 4 | 848 | F2-3 vs. M2-3 | F2-3 up | + | cellular amino acid catabolic process                                                                                                                                                       | GO:0009063 | Metabolism  | Catabolism    | P | 97    | 10  | 2.18   | 4.6   | 1.25E-04 | 7.80E-03 |
| 4 | 849 | F2-3 vs. M2-3 | F2-3 up | + | glycine catabolic process                                                                                                                                                                   | GO:0006546 | Metabolism  | Catabolism    | P | 8     | 3   | 0.18   | 16.72 | 1.52E-03 | 4.61E-02 |
| 4 | 850 | F2-3 vs. M2-3 | F2-3 up | + | organic acid catabolic process                                                                                                                                                              | GO:0016054 | Metabolism  | Catabolism    | P | 162   | 15  | 3.63   | 4.13  | 9.19E-06 | 1.25E-03 |
| 4 | 851 | F2-3 vs. M2-3 | F2-3 up | + | organic hydroxy compound catabolic process                                                                                                                                                  | GO:1901616 | Metabolism  | Catabolism    | P | 44    | 6   | 0.99   | 6.08  | 7.62E-04 | 2.86E-02 |
| 4 | 852 | F2-3 vs. M2-3 | F2-3 up | + | organic substance catabolic process                                                                                                                                                         | GO:1901575 | Metabolism  | Catabolism    | P | 1345  | 55  | 30.17  | 1.82  | 3.17E-05 | 2.92E-03 |
| 4 | 853 | F2-3 vs. M2-3 | F2-3 up | + | pectin catabolic process                                                                                                                                                                    | GO:0045490 | Metabolism  | Catabolism    | P | 99    | 12  | 2.22   | 5.4   | 6.11E-06 | 8.70E-04 |
| 4 | 854 | F2-3 vs. M2-3 | F2-3 up | + | polysaccharide catabolic process                                                                                                                                                            | GO:0000272 | Metabolism  | Catabolism    | P | 144   | 15  | 3.23   | 4.64  | 2.46E-06 | 4.08E-04 |
| 4 | 855 | F2-3 vs. M2-3 | F2-3 up | + | small molecule catabolic process                                                                                                                                                            | GO:0044282 | Metabolism  | Catabolism    | P | 239   | 20  | 5.36   | 3.73  | 1.35E-06 | 2.37E-04 |
| 4 | 856 | F2-3 vs. M2-3 | F2-3 up | - | nucleic acid metabolic process                                                                                                                                                              | GO:0090304 | Development | Cell division | P | 1705  | 16  | 38.25  | 0.42  | 5.82E-05 | 4.35E-03 |
| 4 | 857 | F2-3 vs. M2-3 | F2-3 up | - | RNA metabolic process                                                                                                                                                                       | GO:0016070 | Development | Cell division | P | 1294  | 13  | 29.03  | 0.45  | 1.31E-03 | 4.06E-02 |
| 4 | 858 | F2-3 vs. M2-3 | F2-3 up | + | nucleoside phosphate binding                                                                                                                                                                | GO:1901265 | Development | Cell division | F | 1112  | 43  | 24.94  | 1.72  | 9.15E-04 | 4.82E-02 |
| 4 | 859 | F2-3 vs. M2-3 | F2-3 up | + | nucleotide binding                                                                                                                                                                          | GO:0000166 | Development | Cell division | F | 1112  | 43  | 24.94  | 1.72  | 9.15E-04 | 4.90E-02 |
| 4 | 860 | F2-3 vs. M2-3 | F2-3 up | + | nucleotide-sugar biosynthetic process                                                                                                                                                       | GO:0009226 | Development | Cell division | P | 42    | 6   | 0.94   | 6.37  | 6.11E-04 | 2.52E-02 |
| 4 | 861 | F2-3 vs. M2-3 | F2-3 up | + | nucleotide-sugar metabolic process                                                                                                                                                          | GO:0009225 | Development | Cell division | P | 52    | 6   | 1.17   | 5.14  | 1.67E-03 | 4.98E-02 |
| 4 | 862 | F2-3 vs. M2-3 | F2-3 up | + | pollen tube development                                                                                                                                                                     | GO:0048868 | Development | Cell division | P | 192   | 15  | 4.31   | 3.48  | 5.77E-05 | 4.37E-03 |
| 4 | 863 | F2-3 vs. M2-3 | F2-3 up | + | pollen tube growth                                                                                                                                                                          | GO:0009860 | Development | Cell division | P | 135   | 13  | 3.03   | 4.29  | 2.46E-05 | 2.37E-03 |
| 4 | 864 | F2-3 vs. M2-3 | F2-3 up | + | pollination                                                                                                                                                                                 | GO:0009856 | Development | Cell division | P | 287   | 17  | 6.44   | 2.64  | 4.41E-04 | 2.00E-02 |
| 4 | 865 | F2-3 vs. M2-3 | F2-3 up | + | syncytium formation                                                                                                                                                                         | GO:0006949 | Development | Cell division | P | 16    | 4   | 0.36   | 11.14 | 8.40E-04 | 3.05E-02 |
| 4 | 866 | F2-3 vs. M2-3 | F2-3 up | - | chromatin organization                                                                                                                                                                      | GO:0006325 | Development | Development   | P | 333   | 0   | 7.47   | <     | 1.05E-03 | 3.53E-02 |
| 4 | 867 | F2-3 vs. M2-3 | F2-3 up | - | chromosome organization                                                                                                                                                                     | GO:0051276 | Development | Development   | P | 501   | 0   | 11.24  | <     | 3.37E-05 | 3.00E-03 |
| 4 | 868 | F2-3 vs. M2-3 | F2-3 up | - | nucleus                                                                                                                                                                                     | GO:0005634 | Development | Development   | C | 10540 | 178 | 236.43 | 0.75  | 1.30E-06 | 4.38E-05 |
| 4 | 869 | F2-3 vs. M2-3 | F2-3 up | + | actin cytoskeleton organization                                                                                                                                                             | GO:0030036 | Development | Development   | P | 104   | 11  | 2.33   | 4.72  | 4.70E-05 | 3.70E-03 |

|   |     |               |         |   |                                                |            |             |             |   |       |     |        |       |          |          |
|---|-----|---------------|---------|---|------------------------------------------------|------------|-------------|-------------|---|-------|-----|--------|-------|----------|----------|
| 4 | 870 | F2-3 vs. M2-3 | F2-3 up | + | anatomical structure development               | GO:0048856 | Development | Development | P | 2842  | 90  | 63.75  | 1.41  | 1.06E-03 | 3.54E-02 |
| 4 | 871 | F2-3 vs. M2-3 | F2-3 up | + | apoplast                                       | GO:0048046 | Development | Development | C | 297   | 32  | 6.66   | 4.8   | 2.44E-12 | 3.18E-10 |
| 4 | 872 | F2-3 vs. M2-3 | F2-3 up | + | bounding membrane of organelle                 | GO:0098588 | Development | Development | C | 923   | 42  | 20.7   | 2.03  | 2.74E-05 | 8.64E-04 |
| 4 | 873 | F2-3 vs. M2-3 | F2-3 up | + | cell development                               | GO:0048468 | Development | Development | P | 319   | 19  | 7.16   | 2.66  | 1.95E-04 | 1.12E-02 |
| 4 | 874 | F2-3 vs. M2-3 | F2-3 up | + | cell growth                                    | GO:0016049 | Development | Development | P | 386   | 24  | 8.66   | 2.77  | 1.54E-05 | 1.73E-03 |
| 4 | 875 | F2-3 vs. M2-3 | F2-3 up | + | cell junction                                  | GO:0030054 | Development | Development | C | 944   | 48  | 21.18  | 2.27  | 3.73E-07 | 1.39E-05 |
| 4 | 876 | F2-3 vs. M2-3 | F2-3 up | + | cell morphogenesis                             | GO:0000902 | Development | Development | P | 369   | 22  | 8.28   | 2.66  | 6.20E-05 | 4.41E-03 |
| 4 | 877 | F2-3 vs. M2-3 | F2-3 up | + | cell morphogenesis involved in differentiation | GO:0000904 | Development | Development | P | 229   | 15  | 5.14   | 2.92  | 3.52E-04 | 1.68E-02 |
| 4 | 878 | F2-3 vs. M2-3 | F2-3 up | + | cell periphery                                 | GO:0071944 | Development | Development | C | 4012  | 166 | 90     | 1.84  | 4.61E-15 | 2.40E-12 |
| 4 | 879 | F2-3 vs. M2-3 | F2-3 up | + | cell tip growth                                | GO:0009932 | Development | Development | P | 160   | 15  | 3.59   | 4.18  | 8.01E-06 | 1.11E-03 |
| 4 | 880 | F2-3 vs. M2-3 | F2-3 up | + | cell wall                                      | GO:0005618 | Development | Development | C | 565   | 30  | 12.67  | 2.37  | 2.67E-05 | 8.70E-04 |
| 4 | 881 | F2-3 vs. M2-3 | F2-3 up | + | cell wall modification                         | GO:0042545 | Development | Development | P | 173   | 12  | 3.88   | 3.09  | 8.38E-04 | 3.07E-02 |
| 4 | 882 | F2-3 vs. M2-3 | F2-3 up | + | cell wall organization                         | GO:0071555 | Development | Development | P | 274   | 16  | 6.15   | 2.6   | 7.42E-04 | 2.82E-02 |
| 4 | 883 | F2-3 vs. M2-3 | F2-3 up | + | cell-cell junction                             | GO:0005911 | Development | Development | C | 944   | 48  | 21.18  | 2.27  | 3.73E-07 | 1.55E-05 |
| 4 | 884 | F2-3 vs. M2-3 | F2-3 up | + | cellular anatomical entity                     | GO:0110165 | Development | Development | C | 24430 | 575 | 548.02 | 1.05  | 2.88E-04 | 7.89E-03 |
| 4 | 885 | F2-3 vs. M2-3 | F2-3 up | + | cellular process                               | GO:0009987 | Development | Development | P | 12008 | 355 | 269.37 | 1.32  | 9.37E-12 | 9.34E-09 |
| 4 | 886 | F2-3 vs. M2-3 | F2-3 up | + | cytoplasm                                      | GO:0005737 | Development | Development | C | 14837 | 418 | 332.83 | 1.26  | 6.08E-12 | 7.03E-10 |
| 4 | 887 | F2-3 vs. M2-3 | F2-3 up | + | cytoskeleton organization                      | GO:0007010 | Development | Development | P | 283   | 18  | 6.35   | 2.84  | 1.33E-04 | 8.21E-03 |
| 4 | 888 | F2-3 vs. M2-3 | F2-3 up | + | cytosol                                        | GO:0005829 | Development | Development | C | 3241  | 138 | 72.7   | 1.9   | 2.80E-13 | 7.28E-11 |
| 4 | 889 | F2-3 vs. M2-3 | F2-3 up | + | developmental cell growth                      | GO:0048588 | Development | Development | P | 197   | 16  | 4.42   | 3.62  | 2.13E-05 | 2.19E-03 |
| 4 | 890 | F2-3 vs. M2-3 | F2-3 up | + | developmental growth                           | GO:0048589 | Development | Development | P | 385   | 24  | 8.64   | 2.78  | 1.48E-05 | 1.70E-03 |
| 4 | 891 | F2-3 vs. M2-3 | F2-3 up | + | developmental growth involved in               | GO:0060560 | Development | Development | P | 335   | 23  | 7.51   | 3.06  | 5.16E-06 | 7.91E-04 |
| 4 | 892 | F2-3 vs. M2-3 | F2-3 up | + | developmental process                          | GO:0032502 | Development | Development | P | 2997  | 94  | 67.23  | 1.4   | 1.10E-03 | 3.57E-02 |
| 4 | 893 | F2-3 vs. M2-3 | F2-3 up | + | endomembrane system                            | GO:0012505 | Development | Development | C | 2286  | 79  | 51.28  | 1.54  | 1.72E-04 | 4.96E-03 |
| 4 | 894 | F2-3 vs. M2-3 | F2-3 up | + | envelope                                       | GO:0031975 | Development | Development | C | 1025  | 60  | 22.99  | 2.61  | 8.33E-11 | 8.67E-09 |
| 4 | 895 | F2-3 vs. M2-3 | F2-3 up | + | external encapsulating structure               | GO:0030312 | Development | Development | C | 567   | 30  | 12.72  | 2.36  | 2.83E-05 | 8.66E-04 |
| 4 | 896 | F2-3 vs. M2-3 | F2-3 up | + | external encapsulating structure organization  | GO:0045229 | Development | Development | P | 320   | 18  | 7.18   | 2.51  | 5.40E-04 | 2.34E-02 |
| 4 | 897 | F2-3 vs. M2-3 | F2-3 up | + | extracellular region                           | GO:0005576 | Development | Development | C | 3128  | 121 | 70.17  | 1.72  | 4.81E-09 | 2.64E-07 |
| 4 | 898 | F2-3 vs. M2-3 | F2-3 up | + | Golgi apparatus subcompartment                 | GO:0098791 | Development | Development | C | 437   | 23  | 9.8    | 2.35  | 2.78E-04 | 7.81E-03 |
| 4 | 899 | F2-3 vs. M2-3 | F2-3 up | + | growth                                         | GO:0040007 | Development | Development | P | 443   | 25  | 9.94   | 2.52  | 7.52E-05 | 5.23E-03 |
| 4 | 900 | F2-3 vs. M2-3 | F2-3 up | + | intracellular vesicle                          | GO:0097708 | Development | Development | C | 722   | 31  | 16.2   | 1.91  | 8.90E-04 | 2.11E-02 |
| 4 | 901 | F2-3 vs. M2-3 | F2-3 up | + | membrane                                       | GO:0016020 | Development | Development | C | 5493  | 221 | 123.22 | 1.79  | 1.61E-19 | 1.67E-16 |
| 4 | 902 | F2-3 vs. M2-3 | F2-3 up | + | multi-multicellular organism process           | GO:0044706 | Development | Development | P | 287   | 17  | 6.44   | 2.64  | 4.41E-04 | 2.01E-02 |
| 4 | 903 | F2-3 vs. M2-3 | F2-3 up | + | organelle envelope                             | GO:0031967 | Development | Development | C | 1025  | 60  | 22.99  | 2.61  | 8.33E-11 | 7.88E-09 |
| 4 | 904 | F2-3 vs. M2-3 | F2-3 up | + | organelle subcompartment                       | GO:0031984 | Development | Development | C | 1156  | 62  | 25.93  | 2.39  | 1.23E-09 | 8.52E-08 |
| 4 | 905 | F2-3 vs. M2-3 | F2-3 up | + | phloem loading                                 | GO:0110126 | Development | Development | P | 7     | 3   | 0.16   | 19.11 | 1.12E-03 | 3.59E-02 |
| 4 | 906 | F2-3 vs. M2-3 | F2-3 up | + | plasma membrane                                | GO:0005886 | Development | Development | C | 3534  | 144 | 79.28  | 1.82  | 2.03E-12 | 3.01E-10 |
| 4 | 907 | F2-3 vs. M2-3 | F2-3 up | + | stromule                                       | GO:0010319 | Development | Development | C | 36    | 10  | 0.81   | 12.38 | 4.81E-08 | 2.50E-06 |
| 4 | 908 | F2-3 vs. M2-3 | F2-3 up | + | structural constituent of cytoskeleton         | GO:0005200 | Development | Development | F | 28    | 6   | 0.63   | 9.55  | 8.67E-05 | 7.34E-03 |
| 4 | 909 | F2-3 vs. M2-3 | F2-3 up | + | symplast                                       | GO:0055044 | Development | Development | C | 944   | 48  | 21.18  | 2.27  | 3.73E-07 | 1.49E-05 |
| 4 | 910 | F2-3 vs. M2-3 | F2-3 up | + | unidimensional cell growth                     | GO:0009826 | Development | Development | P | 288   | 21  | 6.46   | 3.25  | 5.58E-06 | 8.14E-04 |
| 4 | 911 | F2-3 vs. M2-3 | F2-3 up | + | vacuolar membrane                              | GO:0005774 | Development | Development | C | 570   | 27  | 12.79  | 2.11  | 5.30E-04 | 1.31E-02 |
| 4 | 912 | F2-3 vs. M2-3 | F2-3 up | + | vacuole                                        | GO:0005773 | Development | Development | C | 1083  | 55  | 24.29  | 2.26  | 6.63E-08 | 3.29E-06 |
| 4 | 913 | F2-3 vs. M2-3 | F2-3 up | - | cellular macromolecule metabolic process       | GO:0044260 | Metabolism  | Metabolism  | P | 4426  | 68  | 99.28  | 0.68  | 4.52E-04 | 2.03E-02 |
| 4 | 914 | F2-3 vs. M2-3 | F2-3 up | - | cellular protein metabolic process             | GO:0044267 | Metabolism  | Metabolism  | P | 3388  | 47  | 76     | 0.62  | 2.34E-04 | 1.28E-02 |
| 4 | 915 | F2-3 vs. M2-3 | F2-3 up | - | protein metabolic process                      | GO:0019538 | Metabolism  | Metabolism  | P | 3544  | 49  | 79.5   | 0.62  | 1.48E-04 | 8.86E-03 |
| 4 | 916 | F2-3 vs. M2-3 | F2-3 up | + | actin binding                                  | GO:0003779 | Metabolism  | Metabolism  | F | 114   | 11  | 2.56   | 4.3   | 1.01E-04 | 8.08E-03 |
| 4 | 917 | F2-3 vs. M2-3 | F2-3 up | + | actin filament binding                         | GO:0051015 | Metabolism  | Metabolism  | F | 75    | 8   | 1.68   | 4.76  | 4.77E-04 | 3.07E-02 |
| 4 | 918 | F2-3 vs. M2-3 | F2-3 up | + | actin filament bundle assembly                 | GO:0051017 | Metabolism  | Metabolism  | P | 20    | 4   | 0.45   | 8.92  | 1.72E-03 | 4.99E-02 |
| 4 | 919 | F2-3 vs. M2-3 | F2-3 up | + | actin filament bundle organization             | GO:0061572 | Metabolism  | Metabolism  | P | 20    | 4   | 0.45   | 8.92  | 1.72E-03 | 5.02E-02 |
| 4 | 920 | F2-3 vs. M2-3 | F2-3 up | + | actin filament organization                    | GO:0007015 | Metabolism  | Metabolism  | P | 92    | 8   | 2.06   | 3.88  | 1.63E-03 | 4.89E-02 |
| 4 | 921 | F2-3 vs. M2-3 | F2-3 up | + | actin filament-based process                   | GO:0030029 | Metabolism  | Metabolism  | P | 113   | 11  | 2.53   | 4.34  | 9.35E-05 | 6.21E-03 |
| 4 | 922 | F2-3 vs. M2-3 | F2-3 up | + | actin monomer binding                          | GO:0003785 | Metabolism  | Metabolism  | F | 7     | 4   | 0.16   | 25.47 | 6.70E-05 | 5.98E-03 |
| 4 | 923 | F2-3 vs. M2-3 | F2-3 up | + | alpha-amino acid metabolic process             | GO:1901605 | Metabolism  | Metabolism  | P | 278   | 20  | 6.24   | 3.21  | 1.12E-05 | 1.39E-03 |
| 4 | 924 | F2-3 vs. M2-3 | F2-3 up | + | anchoring junction                             | GO:0070161 | Metabolism  | Metabolism  | C | 944   | 48  | 21.18  | 2.27  | 3.73E-07 | 1.44E-05 |
| 4 | 925 | F2-3 vs. M2-3 | F2-3 up | + | anion binding                                  | GO:0043168 | Metabolism  | Metabolism  | F | 1369  | 58  | 30.71  | 1.89  | 6.68E-06 | 9.33E-04 |
| 4 | 926 | F2-3 vs. M2-3 | F2-3 up | + | aromatase activity                             | GO:0070330 | Metabolism  | Metabolism  | F | 4     | 3   | 0.09   | 33.43 | 3.44E-04 | 2.31E-02 |
| 4 | 927 | F2-3 vs. M2-3 | F2-3 up | + | binding                                        | GO:0005488 | Metabolism  | Metabolism  | F | 9843  | 291 | 220.8  | 1.32  | 1.12E-08 | 4.51E-06 |
| 4 | 928 | F2-3 vs. M2-3 | F2-3 up | + | biological_process                             | GO:0008150 | Metabolism  | Metabolism  | P | 21988 | 529 | 493.24 | 1.07  | 2.17E-04 | 1.23E-02 |
| 4 | 929 | F2-3 vs. M2-3 | F2-3 up | + | biosynthetic process                           | GO:0009058 | Metabolism  | Metabolism  | P | 2811  | 103 | 63.06  | 1.63  | 1.25E-06 | 2.27E-04 |
| 4 | 930 | F2-3 vs. M2-3 | F2-3 up | + | carbon-carbon lyase activity                   | GO:0016830 | Metabolism  | Metabolism  | F | 111   | 12  | 2.49   | 4.82  | 1.76E-05 | 1.95E-03 |
| 4 | 931 | F2-3 vs. M2-3 | F2-3 up | + | carboxylic acid biosynthetic process           | GO:0046394 | Metabolism  | Metabolism  | P | 468   | 24  | 10.5   | 2.29  | 2.76E-04 | 1.45E-02 |

|   |     |               |         |   |                                                      |            |            |                |   |       |     |        |       |          |          |
|---|-----|---------------|---------|---|------------------------------------------------------|------------|------------|----------------|---|-------|-----|--------|-------|----------|----------|
| 4 | 932 | F2-3 vs. M2-3 | F2-3 up | + | carboxylic acid metabolic process                    | GO:0019752 | Metabolism | Metabolism     | P | 912   | 57  | 20.46  | 2.79  | 1.79E-11 | 1.53E-08 |
| 4 | 933 | F2-3 vs. M2-3 | F2-3 up | + | catalytic activity                                   | GO:0003824 | Metabolism | Metabolism     | F | 8380  | 310 | 187.98 | 1.65  | 4.83E-24 | 1.55E-20 |
| 4 | 934 | F2-3 vs. M2-3 | F2-3 up | + | cation binding                                       | GO:0043169 | Metabolism | Metabolism     | F | 1637  | 68  | 36.72  | 1.85  | 2.05E-06 | 3.67E-04 |
| 4 | 935 | F2-3 vs. M2-3 | F2-3 up | + | cellular aldehyde metabolic process                  | GO:0006081 | Metabolism | Metabolism     | P | 48    | 6   | 1.08   | 5.57  | 1.15E-03 | 3.66E-02 |
| 4 | 936 | F2-3 vs. M2-3 | F2-3 up | + | cellular amino acid metabolic process                | GO:0006520 | Metabolism | Metabolism     | P | 391   | 24  | 8.77   | 2.74  | 1.87E-05 | 2.07E-03 |
| 4 | 937 | F2-3 vs. M2-3 | F2-3 up | + | cellular biosynthetic process                        | GO:0044249 | Metabolism | Metabolism     | P | 2583  | 88  | 57.94  | 1.52  | 1.23E-04 | 7.76E-03 |
| 4 | 938 | F2-3 vs. M2-3 | F2-3 up | + | cellular lipid metabolic process                     | GO:0044255 | Metabolism | Metabolism     | P | 689   | 30  | 15.46  | 1.94  | 1.05E-03 | 3.52E-02 |
| 4 | 939 | F2-3 vs. M2-3 | F2-3 up | + | cellular metabolic process                           | GO:0044237 | Metabolism | Metabolism     | P | 7649  | 219 | 171.58 | 1.28  | 4.24E-05 | 3.52E-03 |
| 4 | 940 | F2-3 vs. M2-3 | F2-3 up | + | copper ion binding                                   | GO:0005507 | Metabolism | Metabolism     | F | 193   | 20  | 4.33   | 4.62  | 5.81E-08 | 1.87E-05 |
| 4 | 941 | F2-3 vs. M2-3 | F2-3 up | + | establishment of localization                        | GO:0051234 | Metabolism | Metabolism     | P | 2306  | 91  | 51.73  | 1.76  | 2.56E-07 | 7.28E-05 |
| 4 | 942 | F2-3 vs. M2-3 | F2-3 up | + | ferrous iron binding                                 | GO:0008198 | Metabolism | Metabolism     | F | 16    | 4   | 0.36   | 11.14 | 8.40E-04 | 4.66E-02 |
| 4 | 943 | F2-3 vs. M2-3 | F2-3 up | + | galacturonan metabolic process                       | GO:0010393 | Metabolism | Metabolism     | P | 163   | 17  | 3.66   | 4.65  | 5.23E-07 | 1.12E-04 |
| 4 | 944 | F2-3 vs. M2-3 | F2-3 up | + | glucosyltransferase activity                         | GO:0046527 | Metabolism | Metabolism     | F | 190   | 13  | 4.26   | 3.05  | 5.83E-04 | 3.61E-02 |
| 4 | 945 | F2-3 vs. M2-3 | F2-3 up | + | glutamine family amino acid metabolic process        | GO:0009064 | Metabolism | Metabolism     | P | 58    | 7   | 1.3    | 5.38  | 5.47E-04 | 2.32E-02 |
| 4 | 946 | F2-3 vs. M2-3 | F2-3 up | + | glycine decarboxylation via glycine cleavage system  | GO:0019464 | Metabolism | Metabolism     | P | 7     | 3   | 0.16   | 19.11 | 1.12E-03 | 3.61E-02 |
| 4 | 947 | F2-3 vs. M2-3 | F2-3 up | + | glycine metabolic process                            | GO:0006544 | Metabolism | Metabolism     | P | 18    | 4   | 0.4    | 9.91  | 1.23E-03 | 3.86E-02 |
| 4 | 948 | F2-3 vs. M2-3 | F2-3 up | + | hydrolase activity                                   | GO:0016787 | Metabolism | Metabolism     | F | 2995  | 108 | 67.18  | 1.61  | 1.28E-06 | 2.42E-04 |
| 4 | 949 | F2-3 vs. M2-3 | F2-3 up | + | hydrolase activity, acting on glycosyl bonds         | GO:0016798 | Metabolism | Metabolism     | F | 536   | 27  | 12.02  | 2.25  | 1.90E-04 | 1.42E-02 |
| 4 | 950 | F2-3 vs. M2-3 | F2-3 up | + | hydrolase activity, hydrolyzing O-glycosyl compounds | GO:0004553 | Metabolism | Metabolism     | F | 396   | 25  | 8.88   | 2.81  | 8.03E-06 | 1.08E-03 |
| 4 | 951 | F2-3 vs. M2-3 | F2-3 up | + | ion binding                                          | GO:0043167 | Metabolism | Metabolism     | F | 2847  | 122 | 63.86  | 1.91  | 7.13E-12 | 7.64E-09 |
| 4 | 952 | F2-3 vs. M2-3 | F2-3 up | + | iron ion binding                                     | GO:0005506 | Metabolism | Metabolism     | F | 325   | 18  | 7.29   | 2.47  | 6.41E-04 | 3.82E-02 |
| 4 | 953 | F2-3 vs. M2-3 | F2-3 up | + | lignin biosynthetic process                          | GO:0009809 | Metabolism | Metabolism     | P | 42    | 6   | 0.94   | 6.37  | 6.11E-04 | 2.48E-02 |
| 4 | 954 | F2-3 vs. M2-3 | F2-3 up | + | lignin metabolic process                             | GO:0009808 | Metabolism | Metabolism     | P | 53    | 8   | 1.19   | 6.73  | 5.43E-05 | 4.22E-03 |
| 4 | 955 | F2-3 vs. M2-3 | F2-3 up | + | lipid metabolic process                              | GO:0006629 | Metabolism | Metabolism     | P | 828   | 35  | 18.57  | 1.88  | 5.34E-04 | 2.33E-02 |
| 4 | 956 | F2-3 vs. M2-3 | F2-3 up | + | localization                                         | GO:0051179 | Metabolism | Metabolism     | P | 2471  | 97  | 55.43  | 1.75  | 1.27E-07 | 4.22E-05 |
| 4 | 957 | F2-3 vs. M2-3 | F2-3 up | + | lyase activity                                       | GO:0016829 | Metabolism | Metabolism     | F | 339   | 26  | 7.6    | 3.42  | 1.78E-07 | 4.76E-05 |
| 4 | 958 | F2-3 vs. M2-3 | F2-3 up | + | metabolic process                                    | GO:0008152 | Metabolism | Metabolism     | P | 8681  | 275 | 194.73 | 1.41  | 2.32E-11 | 1.73E-08 |
| 4 | 959 | F2-3 vs. M2-3 | F2-3 up | + | metal ion binding                                    | GO:0046872 | Metabolism | Metabolism     | F | 1610  | 67  | 36.12  | 1.86  | 2.59E-06 | 4.39E-04 |
| 4 | 960 | F2-3 vs. M2-3 | F2-3 up | + | methionine adenosyltransferase activity              | GO:0004478 | Metabolism | Metabolism     | F | 4     | 3   | 0.09   | 33.43 | 3.44E-04 | 2.26E-02 |
| 4 | 961 | F2-3 vs. M2-3 | F2-3 up | + | molecular_function                                   | GO:0003674 | Metabolism | Metabolism     | F | 21945 | 551 | 492.27 | 1.12  | 3.22E-10 | 1.73E-07 |
| 4 | 962 | F2-3 vs. M2-3 | F2-3 up | + | monocarboxylic acid metabolic process                | GO:0032787 | Metabolism | Metabolism     | P | 439   | 27  | 9.85   | 2.74  | 5.53E-06 | 8.26E-04 |
| 4 | 963 | F2-3 vs. M2-3 | F2-3 up | + | monooxygenase activity                               | GO:0004497 | Metabolism | Metabolism     | F | 222   | 15  | 4.98   | 3.01  | 2.58E-04 | 1.89E-02 |
| 4 | 964 | F2-3 vs. M2-3 | F2-3 up | + | monosaccharide metabolic process                     | GO:0005996 | Metabolism | Metabolism     | P | 125   | 11  | 2.8    | 3.92  | 2.13E-04 | 1.21E-02 |
| 4 | 965 | F2-3 vs. M2-3 | F2-3 up | + | organic acid biosynthetic process                    | GO:0016053 | Metabolism | Metabolism     | P | 468   | 24  | 10.5   | 2.29  | 2.76E-04 | 1.46E-02 |
| 4 | 966 | F2-3 vs. M2-3 | F2-3 up | + | organic acid metabolic process                       | GO:0006082 | Metabolism | Metabolism     | P | 1019  | 62  | 22.86  | 2.71  | 6.34E-12 | 9.47E-09 |
| 4 | 967 | F2-3 vs. M2-3 | F2-3 up | + | organic hydroxy compound metabolic process           | GO:1901615 | Metabolism | Metabolism     | P | 292   | 20  | 6.55   | 3.05  | 2.17E-05 | 2.20E-03 |
| 4 | 968 | F2-3 vs. M2-3 | F2-3 up | + | organic substance biosynthetic process               | GO:1901576 | Metabolism | Metabolism     | P | 2674  | 95  | 59.98  | 1.58  | 1.10E-05 | 1.39E-03 |
| 4 | 969 | F2-3 vs. M2-3 | F2-3 up | + | organic substance metabolic process                  | GO:0071704 | Metabolism | Metabolism     | P | 7851  | 224 | 176.11 | 1.27  | 4.01E-05 | 3.43E-03 |
| 4 | 970 | F2-3 vs. M2-3 | F2-3 up | + | oxidation-reduction process                          | GO:0055114 | Metabolism | Metabolism     | P | 768   | 48  | 17.23  | 2.79  | 7.65E-10 | 3.81E-07 |
| 4 | 971 | F2-3 vs. M2-3 | F2-3 up | + | oxoacid metabolic process                            | GO:0043436 | Metabolism | Metabolism     | P | 1016  | 62  | 22.79  | 2.72  | 5.64E-12 | 1.12E-08 |
| 4 | 972 | F2-3 vs. M2-3 | F2-3 up | + | pectin metabolic process                             | GO:0045488 | Metabolism | Metabolism     | P | 162   | 17  | 3.63   | 4.68  | 4.84E-07 | 1.11E-04 |
| 4 | 973 | F2-3 vs. M2-3 | F2-3 up | + | pectinesterase activity                              | GO:0030599 | Metabolism | Metabolism     | F | 92    | 10  | 2.06   | 4.85  | 8.37E-05 | 7.27E-03 |
| 4 | 974 | F2-3 vs. M2-3 | F2-3 up | + | phenylpropanoid biosynthetic process                 | GO:0009699 | Metabolism | Metabolism     | P | 88    | 9   | 1.97   | 4.56  | 2.86E-04 | 1.46E-02 |
| 4 | 975 | F2-3 vs. M2-3 | F2-3 up | + | phenylpropanoid metabolic process                    | GO:0009698 | Metabolism | Metabolism     | P | 109   | 9   | 2.45   | 3.68  | 1.19E-03 | 3.78E-02 |
| 4 | 976 | F2-3 vs. M2-3 | F2-3 up | + | polygalacturonase activity                           | GO:0004650 | Metabolism | Metabolism     | F | 69    | 9   | 1.55   | 5.81  | 5.27E-05 | 4.84E-03 |
| 4 | 977 | F2-3 vs. M2-3 | F2-3 up | + | proton export across plasma membrane                 | GO:0120029 | Metabolism | Metabolism     | P | 10    | 5   | 0.22   | 22.29 | 1.25E-05 | 1.53E-03 |
| 4 | 978 | F2-3 vs. M2-3 | F2-3 up | + | S-adenosylmethionine biosynthetic process            | GO:0006556 | Metabolism | Metabolism     | P | 4     | 3   | 0.09   | 33.43 | 3.44E-04 | 1.70E-02 |
| 4 | 979 | F2-3 vs. M2-3 | F2-3 up | + | S-adenosylmethionine metabolic process               | GO:0046500 | Metabolism | Metabolism     | P | 9     | 4   | 0.2    | 19.81 | 1.40E-04 | 8.46E-03 |
| 4 | 980 | F2-3 vs. M2-3 | F2-3 up | + | secondary metabolic process                          | GO:0019748 | Metabolism | Metabolism     | P | 303   | 18  | 6.8    | 2.65  | 2.93E-04 | 1.48E-02 |
| 4 | 981 | F2-3 vs. M2-3 | F2-3 up | + | secondary metabolite biosynthetic process            | GO:0044550 | Metabolism | Metabolism     | P | 144   | 14  | 3.23   | 4.33  | 1.09E-05 | 1.42E-03 |
| 4 | 982 | F2-3 vs. M2-3 | F2-3 up | + | sequestering of actin monomers                       | GO:0042989 | Metabolism | Metabolism     | P | 5     | 3   | 0.11   | 26.75 | 5.42E-04 | 2.31E-02 |
| 4 | 983 | F2-3 vs. M2-3 | F2-3 up | + | small molecule binding                               | GO:0036094 | Metabolism | Metabolism     | F | 1340  | 55  | 30.06  | 1.83  | 3.02E-05 | 3.23E-03 |
| 4 | 984 | F2-3 vs. M2-3 | F2-3 up | + | small molecule biosynthetic process                  | GO:0044283 | Metabolism | Metabolism     | P | 645   | 36  | 14.47  | 2.49  | 1.58E-06 | 2.70E-04 |
| 4 | 985 | F2-3 vs. M2-3 | F2-3 up | + | small molecule metabolic process                     | GO:0044281 | Metabolism | Metabolism     | P | 1520  | 80  | 34.1   | 2.35  | 6.39E-12 | 7.64E-09 |
| 4 | 986 | F2-3 vs. M2-3 | F2-3 up | + | sulfur compound biosynthetic process                 | GO:0044272 | Metabolism | Metabolism     | P | 142   | 12  | 3.19   | 3.77  | 1.58E-04 | 9.28E-03 |
| 4 | 987 | F2-3 vs. M2-3 | F2-3 up | + | sulfur compound metabolic process                    | GO:0006790 | Metabolism | Metabolism     | P | 363   | 19  | 8.14   | 2.33  | 1.07E-03 | 3.55E-02 |
| 4 | 988 | F2-3 vs. M2-3 | F2-3 up | + | transition metal ion binding                         | GO:0046914 | Metabolism | Metabolism     | F | 1178  | 45  | 26.43  | 1.7   | 8.84E-04 | 4.82E-02 |
| 4 | 989 | F2-3 vs. M2-3 | F2-3 up | + | wax biosynthetic process                             | GO:0010025 | Metabolism | Metabolism     | P | 27    | 5   | 0.61   | 8.26  | 6.17E-04 | 2.49E-02 |
| 4 | 990 | F2-3 vs. M2-3 | F2-3 up | + | wax metabolic process                                | GO:0010166 | Metabolism | Metabolism     | P | 28    | 5   | 0.63   | 7.96  | 7.14E-04 | 2.75E-02 |
| 4 | 991 | F2-3 vs. M2-3 | F2-3 up | + | carbon fixation                                      | GO:0015977 | Metabolism | Photosynthesis | P | 16    | 4   | 0.36   | 11.14 | 8.40E-04 | 3.06E-02 |

|   |      |               |         |   |                                                                |            |                        |                      |   |      |     |        |       |          |          |
|---|------|---------------|---------|---|----------------------------------------------------------------|------------|------------------------|----------------------|---|------|-----|--------|-------|----------|----------|
| 4 | 992  | F2-3 vs. M2-3 | F2-3 up | + | chloroplast                                                    | GO:0009507 | Metabolism             | Photosynthesis       | C | 5013 | 175 | 112.45 | 1.56  | 1.20E-09 | 8.94E-08 |
| 4 | 993  | F2-3 vs. M2-3 | F2-3 up | + | chloroplast envelope                                           | GO:0009941 | Metabolism             | Photosynthesis       | C | 613  | 48  | 13.75  | 3.49  | 5.21E-13 | 9.03E-11 |
| 4 | 994  | F2-3 vs. M2-3 | F2-3 up | + | chloroplast stroma                                             | GO:0009570 | Metabolism             | Photosynthesis       | C | 719  | 46  | 16.13  | 2.85  | 8.74E-10 | 7.00E-08 |
| 4 | 995  | F2-3 vs. M2-3 | F2-3 up | + | chloroplast thylakoid                                          | GO:0009534 | Metabolism             | Photosynthesis       | C | 443  | 34  | 9.94   | 3.42  | 2.25E-09 | 1.38E-07 |
| 4 | 996  | F2-3 vs. M2-3 | F2-3 up | + | chloroplast thylakoid membrane                                 | GO:0009535 | Metabolism             | Photosynthesis       | C | 358  | 26  | 8.03   | 3.24  | 4.72E-07 | 1.70E-05 |
| 4 | 997  | F2-3 vs. M2-3 | F2-3 up | + | fructose 1,6-bisphosphate metabolic process                    | GO:0030388 | Metabolism             | Photosynthesis       | P | 12   | 4   | 0.27   | 14.86 | 3.38E-04 | 1.69E-02 |
| 4 | 998  | F2-3 vs. M2-3 | F2-3 up | + | photosynthesis                                                 | GO:0015979 | Metabolism             | Photosynthesis       | P | 189  | 20  | 4.24   | 4.72  | 4.23E-08 | 1.58E-05 |
| 4 | 999  | F2-3 vs. M2-3 | F2-3 up | + | photosynthesis, dark reaction                                  | GO:0019685 | Metabolism             | Photosynthesis       | P | 15   | 4   | 0.34   | 11.89 | 6.84E-04 | 2.69E-02 |
| 4 | 1000 | F2-3 vs. M2-3 | F2-3 up | + | photosynthesis, light reaction                                 | GO:0019684 | Metabolism             | Photosynthesis       | P | 128  | 14  | 2.87   | 4.88  | 3.15E-06 | 5.09E-04 |
| 4 | 1001 | F2-3 vs. M2-3 | F2-3 up | + | photosynthetic electron transport chain                        | GO:0009767 | Metabolism             | Photosynthesis       | P | 46   | 7   | 1.03   | 6.78  | 1.52E-04 | 8.99E-03 |
| 4 | 1002 | F2-3 vs. M2-3 | F2-3 up | + | photosynthetic electron transport in photosystem               | GO:0009773 | Metabolism             | Photosynthesis       | P | 17   | 4   | 0.38   | 10.49 | 1.02E-03 | 3.49E-02 |
| 4 | 1003 | F2-3 vs. M2-3 | F2-3 up | + | photosynthetic membrane                                        | GO:0034357 | Metabolism             | Photosynthesis       | C | 395  | 28  | 8.86   | 3.16  | 2.73E-07 | 1.23E-05 |
| 4 | 1004 | F2-3 vs. M2-3 | F2-3 up | + | plastid                                                        | GO:0009536 | Metabolism             | Photosynthesis       | C | 5432 | 190 | 121.85 | 1.56  | 1.41E-10 | 1.22E-08 |
| 4 | 1005 | F2-3 vs. M2-3 | F2-3 up | + | plastid envelope                                               | GO:0009526 | Metabolism             | Photosynthesis       | C | 637  | 50  | 14.29  | 3.5   | 1.53E-13 | 5.32E-11 |
| 4 | 1006 | F2-3 vs. M2-3 | F2-3 up | + | plastid stroma                                                 | GO:0009532 | Metabolism             | Photosynthesis       | C | 731  | 46  | 16.4   | 2.81  | 1.43E-09 | 9.31E-08 |
| 4 | 1007 | F2-3 vs. M2-3 | F2-3 up | + | plastid thylakoid                                              | GO:0031976 | Metabolism             | Photosynthesis       | C | 446  | 34  | 10     | 3.4   | 2.64E-09 | 1.53E-07 |
| 4 | 1008 | F2-3 vs. M2-3 | F2-3 up | + | plastid thylakoid membrane                                     | GO:0055035 | Metabolism             | Photosynthesis       | C | 363  | 26  | 8.14   | 3.19  | 6.04E-07 | 2.10E-05 |
| 4 | 1009 | F2-3 vs. M2-3 | F2-3 up | + | plastoglobule                                                  | GO:0010287 | Metabolism             | Photosynthesis       | C | 76   | 8   | 1.7    | 4.69  | 5.17E-04 | 1.31E-02 |
| 4 | 1010 | F2-3 vs. M2-3 | F2-3 up | + | thylakoid                                                      | GO:0009579 | Metabolism             | Photosynthesis       | C | 537  | 45  | 12.05  | 3.74  | 3.28E-13 | 6.83E-11 |
| 4 | 1011 | F2-3 vs. M2-3 | F2-3 up | + | thylakoid membrane                                             | GO:0042651 | Metabolism             | Photosynthesis       | C | 390  | 28  | 8.75   | 3.2   | 2.14E-07 | 1.01E-05 |
| 4 | 1012 | F2-3 vs. M2-3 | F2-3 up | + | Golgi apparatus                                                | GO:0005794 | Regulation             | Protein modification | C | 1161 | 46  | 26.04  | 1.77  | 3.82E-04 | 9.93E-03 |
| 4 | 1013 | F2-3 vs. M2-3 | F2-3 up | + | maintenance of location in cell                                | GO:0051651 | Regulation             | Protein modification | P | 46   | 6   | 1.03   | 5.81  | 9.41E-04 | 3.35E-02 |
| 4 | 1014 | F2-3 vs. M2-3 | F2-3 up | - | protein modification by small protein conjugation or removal   | GO:0070647 | Regulation             | Protein modification | P | 815  | 5   | 18.28  | 0.27  | 5.88E-04 | 2.44E-02 |
| 4 | 1015 | F2-3 vs. M2-3 | F2-3 up | + | negative regulation of protein polymerization                  | GO:0032272 | Regulation             | Protein modification | P | 15   | 4   | 0.34   | 11.89 | 6.84E-04 | 2.71E-02 |
| 4 | 1016 | F2-3 vs. M2-3 | F2-3 up | + | negative regulation of protein-containing complex assembly     | GO:0031333 | Regulation             | Protein modification | P | 15   | 4   | 0.34   | 11.89 | 6.84E-04 | 2.73E-02 |
| 4 | 1017 | F2-3 vs. M2-3 | F2-3 up | - | regulation of cellular biosynthetic process                    | GO:0031326 | Regulation             | Regulation           | P | 2477 | 33  | 55.56  | 0.59  | 9.88E-04 | 3.43E-02 |
| 4 | 1018 | F2-3 vs. M2-3 | F2-3 up | - | regulation of cellular macromolecule biosynthetic process      | GO:2000112 | Regulation             | Regulation           | P | 2365 | 28  | 53.05  | 0.53  | 1.40E-04 | 8.54E-03 |
| 4 | 1019 | F2-3 vs. M2-3 | F2-3 up | - | regulation of cellular metabolic process                       | GO:0031323 | Regulation             | Regulation           | P | 2975 | 43  | 66.74  | 0.64  | 1.56E-03 | 4.70E-02 |
| 4 | 1020 | F2-3 vs. M2-3 | F2-3 up | - | regulation of macromolecule biosynthetic process               | GO:0010556 | Regulation             | Regulation           | P | 2378 | 29  | 53.34  | 0.54  | 2.57E-04 | 1.39E-02 |
| 4 | 1021 | F2-3 vs. M2-3 | F2-3 up | - | regulation of macromolecule metabolic process                  | GO:0060255 | Regulation             | Regulation           | P | 3058 | 38  | 68.6   | 0.55  | 3.85E-05 | 3.34E-03 |
| 4 | 1022 | F2-3 vs. M2-3 | F2-3 up | - | regulation of metabolic process                                | GO:0019222 | Regulation             | Regulation           | P | 3325 | 48  | 74.59  | 0.64  | 6.99E-04 | 2.71E-02 |
| 4 | 1023 | F2-3 vs. M2-3 | F2-3 up | - | regulation of nitrogen compound metabolic process              | GO:0051171 | Regulation             | Regulation           | P | 2741 | 36  | 61.49  | 0.59  | 3.69E-04 | 1.74E-02 |
| 4 | 1024 | F2-3 vs. M2-3 | F2-3 up | - | regulation of nucleobase-containing compound metabolic process | GO:0019219 | Regulation             | Regulation           | P | 2344 | 31  | 52.58  | 0.59  | 1.24E-03 | 3.87E-02 |
| 4 | 1025 | F2-3 vs. M2-3 | F2-3 up | - | regulation of primary metabolic process                        | GO:0080090 | Regulation             | Regulation           | P | 2825 | 37  | 63.37  | 0.58  | 2.64E-04 | 1.41E-02 |
| 4 | 1026 | F2-3 vs. M2-3 | F2-3 up | + | negative regulation of actin filament                          | GO:0030837 | Regulation             | Regulation           | P | 13   | 4   | 0.29   | 13.72 | 4.35E-04 | 2.02E-02 |
| 4 | 1027 | F2-3 vs. M2-3 | F2-3 up | + | negative regulation of cytoskeleton organization               | GO:0051494 | Regulation             | Regulation           | P | 17   | 4   | 0.38   | 10.49 | 1.02E-03 | 3.51E-02 |
| 4 | 1028 | F2-3 vs. M2-3 | F2-3 up | + | negative regulation of supramolecular fiber organization       | GO:1902904 | Regulation             | Regulation           | P | 17   | 4   | 0.38   | 10.49 | 1.02E-03 | 3.53E-02 |
| 4 | 1029 | F2-3 vs. M2-3 | F2-3 up | + | regulation of cell morphogenesis involved in differentiation   | GO:0010769 | Regulation             | Regulation           | P | 40   | 7   | 0.9    | 7.8   | 6.94E-05 | 4.88E-03 |
| 4 | 1030 | F2-3 vs. M2-3 | F2-3 up | + | regulation of pollen tube growth                               | GO:0080092 | Regulation             | Regulation           | P | 35   | 7   | 0.79   | 8.92  | 3.28E-05 | 2.97E-03 |
| 4 | 1031 | F2-3 vs. M2-3 | F2-3 up | + | regulation of unidimensional cell growth                       | GO:0051510 | Regulation             | Regulation           | P | 74   | 8   | 1.66   | 4.82  | 4.40E-04 | 2.02E-02 |
| 4 | 1032 | F2-3 vs. M2-3 | F2-3 up | + | cellular response to abiotic stimulus                          | GO:0071214 | Signaling and response | Signaling            | P | 189  | 12  | 4.24   | 2.83  | 1.71E-03 | 5.02E-02 |
| 4 | 1033 | F2-3 vs. M2-3 | F2-3 up | + | cellular response to blue light                                | GO:0071483 | Signaling and response | Signaling            | P | 27   | 5   | 0.61   | 8.26  | 6.17E-04 | 2.47E-02 |
| 4 | 1034 | F2-3 vs. M2-3 | F2-3 up | + | cellular response to environmental stimulus                    | GO:0104004 | Signaling and response | Signaling            | P | 189  | 12  | 4.24   | 2.83  | 1.71E-03 | 5.05E-02 |
| 4 | 1035 | F2-3 vs. M2-3 | F2-3 up | + | response to abiotic stimulus                                   | GO:0009628 | Signaling and response | Signaling            | P | 2131 | 96  | 47.8   | 2.01  | 1.95E-10 | 1.16E-07 |
| 4 | 1036 | F2-3 vs. M2-3 | F2-3 up | + | response to acid chemical                                      | GO:0001101 | Signaling and response | Signaling            | P | 397  | 20  | 8.91   | 2.25  | 1.10E-03 | 3.59E-02 |
| 4 | 1037 | F2-3 vs. M2-3 | F2-3 up | + | response to bacterium                                          | GO:0009617 | Signaling and response | Signaling            | P | 508  | 30  | 11.4   | 2.63  | 3.63E-06 | 5.71E-04 |
| 4 | 1038 | F2-3 vs. M2-3 | F2-3 up | + | response to biotic stimulus                                    | GO:0009607 | Signaling and response | Signaling            | P | 1098 | 48  | 24.63  | 1.95  | 1.96E-05 | 2.06E-03 |
| 4 | 1039 | F2-3 vs. M2-3 | F2-3 up | + | response to cadmium ion                                        | GO:0046686 | Signaling and response | Signaling            | P | 315  | 24  | 7.07   | 3.4   | 5.88E-07 | 1.21E-04 |
| 4 | 1040 | F2-3 vs. M2-3 | F2-3 up | + | response to chemical                                           | GO:0042221 | Signaling and response | Signaling            | P | 2681 | 108 | 60.14  | 1.8   | 4.81E-09 | 2.21E-06 |
| 4 | 1041 | F2-3 vs. M2-3 | F2-3 up | + | response to external biotic stimulus                           | GO:0043207 | Signaling and response | Signaling            | P | 1097 | 48  | 24.61  | 1.95  | 1.93E-05 | 2.10E-03 |
| 4 | 1042 | F2-3 vs. M2-3 | F2-3 up | + | response to external stimulus                                  | GO:0009605 | Signaling and response | Signaling            | P | 1513 | 67  | 33.94  | 1.97  | 3.08E-07 | 8.01E-05 |
| 4 | 1043 | F2-3 vs. M2-3 | F2-3 up | + | response to extracellular stimulus                             | GO:0009991 | Signaling and response | Signaling            | P | 262  | 15  | 5.88   | 2.55  | 1.29E-03 | 4.02E-02 |
| 4 | 1044 | F2-3 vs. M2-3 | F2-3 up | + | response to inorganic substance                                | GO:0010035 | Signaling and response | Signaling            | P | 914  | 51  | 20.5   | 2.49  | 8.55E-09 | 3.65E-06 |
| 4 | 1045 | F2-3 vs. M2-3 | F2-3 up | + | response to karrikin                                           | GO:0080167 | Signaling and response | Signaling            | P | 128  | 15  | 2.87   | 5.22  | 6.39E-07 | 1.27E-04 |
| 4 | 1046 | F2-3 vs. M2-3 | F2-3 up | + | response to light stimulus                                     | GO:0009416 | Signaling and response | Signaling            | P | 713  | 41  | 15.99  | 2.56  | 1.61E-07 | 5.07E-05 |



|   |      |               |         |   |                                                               |            |                        |               |   |      |     |        |       |          |          |
|---|------|---------------|---------|---|---------------------------------------------------------------|------------|------------------------|---------------|---|------|-----|--------|-------|----------|----------|
| 4 | 1047 | F2-3 vs. M2-3 | F2-3 up | + | response to metal ion                                         | GO:0010038 | Signaling and response | Signaling     | P | 433  | 29  | 9.71   | 2.99  | 5.02E-07 | 1.11E-04 |
| 4 | 1048 | F2-3 vs. M2-3 | F2-3 up | + | response to oxygen-containing compound                        | GO:1901700 | Signaling and response | Signaling     | P | 1514 | 68  | 33.96  | 2     | 1.22E-07 | 4.31E-05 |
| 4 | 1049 | F2-3 vs. M2-3 | F2-3 up | + | response to stimulus                                          | GO:0050896 | Signaling and response | Signaling     | P | 5578 | 209 | 125.13 | 1.67  | 6.88E-15 | 4.11E-11 |
| 4 | 1050 | F2-3 vs. M2-3 | F2-3 up | + | response to temperature stimulus                              | GO:0009266 | Signaling and response | Signaling     | P | 617  | 31  | 13.84  | 2.24  | 5.74E-05 | 4.40E-03 |
| 4 | 1051 | F2-3 vs. M2-3 | F2-3 up | + | response to UV                                                | GO:0009411 | Signaling and response | Signaling     | P | 125  | 10  | 2.8    | 3.57  | 8.14E-04 | 3.02E-02 |
| 4 | 1052 | F2-3 vs. M2-3 | F2-3 up | + | response to water                                             | GO:0009415 | Signaling and response | Signaling     | P | 365  | 20  | 8.19   | 2.44  | 5.58E-04 | 2.33E-02 |
| 4 | 1053 | F2-3 vs. M2-3 | F2-3 up | + | small GTPase mediated signal transduction                     | GO:0007264 | Signaling and response | Signaling     | P | 20   | 4   | 0.45   | 8.92  | 1.72E-03 | 5.04E-02 |
| 4 | 1054 | F2-3 vs. M2-3 | F2-3 up | + | cellular cation homeostasis                                   | GO:0030003 | Signaling and response | Stress        | P | 159  | 11  | 3.57   | 3.08  | 1.39E-03 | 4.25E-02 |
| 4 | 1055 | F2-3 vs. M2-3 | F2-3 up | + | cellular chemical homeostasis                                 | GO:0055082 | Signaling and response | Stress        | P | 195  | 13  | 4.37   | 2.97  | 7.32E-04 | 2.81E-02 |
| 4 | 1056 | F2-3 vs. M2-3 | F2-3 up | + | cellular homeostasis                                          | GO:0019725 | Signaling and response | Stress        | P | 275  | 16  | 6.17   | 2.59  | 7.69E-04 | 2.87E-02 |
| 4 | 1057 | F2-3 vs. M2-3 | F2-3 up | + | cellular ion homeostasis                                      | GO:0006873 | Signaling and response | Stress        | P | 169  | 12  | 3.79   | 3.17  | 6.91E-04 | 2.70E-02 |
| 4 | 1058 | F2-3 vs. M2-3 | F2-3 up | + | cellular monovalent inorganic cation                          | GO:0030004 | Signaling and response | Stress        | P | 39   | 7   | 0.87   | 8     | 6.02E-05 | 4.34E-03 |
| 4 | 1059 | F2-3 vs. M2-3 | F2-3 up | + | chemical homeostasis                                          | GO:0048878 | Signaling and response | Stress        | P | 415  | 22  | 9.31   | 2.36  | 3.58E-04 | 1.70E-02 |
| 4 | 1060 | F2-3 vs. M2-3 | F2-3 up | + | defense response                                              | GO:0006952 | Signaling and response | Stress        | P | 953  | 43  | 21.38  | 2.01  | 3.39E-05 | 2.98E-03 |
| 4 | 1061 | F2-3 vs. M2-3 | F2-3 up | + | defense response to bacterium                                 | GO:0042742 | Signaling and response | Stress        | P | 414  | 24  | 9.29   | 2.58  | 4.44E-05 | 3.63E-03 |
| 4 | 1062 | F2-3 vs. M2-3 | F2-3 up | + | defense response to other organism                            | GO:0098542 | Signaling and response | Stress        | P | 807  | 33  | 18.1   | 1.82  | 1.63E-03 | 4.89E-02 |
| 4 | 1063 | F2-3 vs. M2-3 | F2-3 up | + | homeostatic process                                           | GO:0042592 | Signaling and response | Stress        | P | 537  | 25  | 12.05  | 2.08  | 1.08E-03 | 3.54E-02 |
| 4 | 1064 | F2-3 vs. M2-3 | F2-3 up | + | inorganic ion homeostasis                                     | GO:0098771 | Signaling and response | Stress        | P | 250  | 15  | 5.61   | 2.67  | 8.28E-04 | 3.06E-02 |
| 4 | 1065 | F2-3 vs. M2-3 | F2-3 up | + | interspecies interaction between organisms                    | GO:0044419 | Signaling and response | Stress        | P | 1125 | 49  | 25.24  | 1.94  | 2.28E-05 | 2.23E-03 |
| 4 | 1066 | F2-3 vs. M2-3 | F2-3 up | + | ion homeostasis                                               | GO:0050801 | Signaling and response | Stress        | P | 290  | 17  | 6.51   | 2.61  | 4.93E-04 | 2.20E-02 |
| 4 | 1067 | F2-3 vs. M2-3 | F2-3 up | + | reactive oxygen species metabolic process                     | GO:0072593 | Signaling and response | Stress        | P | 69   | 8   | 1.55   | 5.17  | 2.86E-04 | 1.47E-02 |
| 4 | 1068 | F2-3 vs. M2-3 | F2-3 up | + | regulation of cellular pH                                     | GO:0030641 | Signaling and response | Stress        | P | 28   | 6   | 0.63   | 9.55  | 8.67E-05 | 5.89E-03 |
| 4 | 1069 | F2-3 vs. M2-3 | F2-3 up | + | regulation of intracellular pH                                | GO:0051453 | Signaling and response | Stress        | P | 28   | 6   | 0.63   | 9.55  | 8.67E-05 | 5.83E-03 |
| 4 | 1070 | F2-3 vs. M2-3 | F2-3 up | + | response to cold                                              | GO:0009409 | Signaling and response | Stress        | P | 415  | 24  | 9.31   | 2.58  | 4.60E-05 | 3.67E-03 |
| 4 | 1071 | F2-3 vs. M2-3 | F2-3 up | + | response to desiccation                                       | GO:0009269 | Signaling and response | Stress        | P | 24   | 6   | 0.54   | 11.14 | 4.13E-05 | 3.47E-03 |
| 4 | 1072 | F2-3 vs. M2-3 | F2-3 up | + | response to other organism                                    | GO:0051707 | Signaling and response | Stress        | P | 1097 | 48  | 24.61  | 1.95  | 1.93E-05 | 2.06E-03 |
| 4 | 1073 | F2-3 vs. M2-3 | F2-3 up | + | response to oxidative stress                                  | GO:0006979 | Signaling and response | Stress        | P | 460  | 25  | 10.32  | 2.42  | 1.02E-04 | 6.70E-03 |
| 4 | 1074 | F2-3 vs. M2-3 | F2-3 up | + | response to radiation                                         | GO:0009314 | Signaling and response | Stress        | P | 738  | 41  | 16.55  | 2.48  | 3.04E-07 | 8.25E-05 |
| 4 | 1075 | F2-3 vs. M2-3 | F2-3 up | + | response to reactive oxygen species                           | GO:0000302 | Signaling and response | Stress        | P | 160  | 11  | 3.59   | 3.06  | 1.45E-03 | 4.43E-02 |
| 4 | 1076 | F2-3 vs. M2-3 | F2-3 up | + | response to stress                                            | GO:0006950 | Signaling and response | Stress        | P | 3106 | 126 | 69.67  | 1.81  | 1.05E-10 | 6.96E-08 |
| 4 | 1077 | F2-3 vs. M2-3 | F2-3 up | + | response to UV-B                                              | GO:0010224 | Signaling and response | Stress        | P | 73   | 8   | 1.64   | 4.89  | 4.04E-04 | 1.89E-02 |
| 4 | 1078 | F2-3 vs. M2-3 | F2-3 up | + | response to water deprivation                                 | GO:0009414 | Signaling and response | Stress        | P | 356  | 20  | 7.99   | 2.5   | 2.76E-04 | 1.44E-02 |
| 4 | 1079 | F2-3 vs. M2-3 | F2-3 up | + | response to wounding                                          | GO:0009611 | Signaling and response | Stress        | P | 227  | 20  | 5.09   | 3.93  | 6.40E-07 | 1.24E-04 |
| 4 | 1080 | F2-3 vs. M2-3 | F2-3 up | - | macromolecule modification                                    | GO:0043412 | Regulation             | Transcription | P | 2832 | 39  | 63.53  | 0.61  | 7.52E-04 | 2.85E-02 |
| 4 | 1081 | F2-3 vs. M2-3 | F2-3 up | - | regulation of gene expression                                 | GO:0010468 | Regulation             | Transcription | P | 2679 | 34  | 60.1   | 0.57  | 2.40E-04 | 1.31E-02 |
| 4 | 1082 | F2-3 vs. M2-3 | F2-3 up | - | regulation of nucleic acid-templated transcription            | GO:1903506 | Regulation             | Transcription | P | 2184 | 26  | 48.99  | 0.53  | 3.50E-04 | 1.70E-02 |
| 4 | 1083 | F2-3 vs. M2-3 | F2-3 up | - | regulation of RNA biosynthetic process                        | GO:2001141 | Regulation             | Transcription | P | 2186 | 26  | 49.04  | 0.53  | 3.51E-04 | 1.69E-02 |
| 4 | 1084 | F2-3 vs. M2-3 | F2-3 up | - | regulation of transcription, DNA-templated                    | GO:0006355 | Regulation             | Transcription | P | 2184 | 26  | 48.99  | 0.53  | 3.50E-04 | 1.72E-02 |
| 4 | 1085 | F2-3 vs. M2-3 | F2-3 up | + | mRNA binding                                                  | GO:0003729 | Regulation             | Translation   | F | 1005 | 46  | 22.54  | 2.04  | 1.24E-05 | 1.60E-03 |
| 4 | 1086 | F2-3 vs. M2-3 | F2-3 up | + | active ion transmembrane transporter activity                 | GO:0022853 | Metabolism             | Transporters  | F | 215  | 19  | 4.82   | 3.94  | 1.17E-06 | 2.34E-04 |
| 4 | 1087 | F2-3 vs. M2-3 | F2-3 up | + | active transmembrane transporter activity                     | GO:0022804 | Metabolism             | Transporters  | F | 482  | 32  | 10.81  | 2.96  | 1.56E-07 | 4.55E-05 |
| 4 | 1088 | F2-3 vs. M2-3 | F2-3 up | + | anion transport                                               | GO:0006820 | Metabolism             | Transporters  | P | 283  | 16  | 6.35   | 2.52  | 1.02E-03 | 3.48E-02 |
| 4 | 1089 | F2-3 vs. M2-3 | F2-3 up | + | ATPase-coupled cation transmembrane transporter activity      | GO:0019829 | Metabolism             | Transporters  | F | 61   | 11  | 1.37   | 8.04  | 4.67E-07 | 1.07E-04 |
| 4 | 1090 | F2-3 vs. M2-3 | F2-3 up | + | ATPase-coupled ion transmembrane transporter activity         | GO:0042625 | Metabolism             | Transporters  | F | 76   | 11  | 1.7    | 6.45  | 3.21E-06 | 5.16E-04 |
| 4 | 1091 | F2-3 vs. M2-3 | F2-3 up | + | ATPase-coupled transmembrane transporter activity             | GO:0042626 | Metabolism             | Transporters  | F | 190  | 18  | 4.26   | 4.22  | 8.86E-07 | 1.90E-04 |
| 4 | 1092 | F2-3 vs. M2-3 | F2-3 up | + | cation transmembrane transport                                | GO:0098655 | Metabolism             | Transporters  | P | 229  | 16  | 5.14   | 3.11  | 1.14E-04 | 7.22E-03 |
| 4 | 1093 | F2-3 vs. M2-3 | F2-3 up | + | cation transmembrane transporter activity                     | GO:0008324 | Metabolism             | Transporters  | F | 414  | 25  | 9.29   | 2.69  | 1.63E-05 | 2.02E-03 |
| 4 | 1094 | F2-3 vs. M2-3 | F2-3 up | + | cation transport                                              | GO:0006812 | Metabolism             | Transporters  | P | 412  | 23  | 9.24   | 2.49  | 1.68E-04 | 9.75E-03 |
| 4 | 1095 | F2-3 vs. M2-3 | F2-3 up | + | cytoplasmic vesicle                                           | GO:0031410 | Metabolism             | Transporters  | C | 720  | 30  | 16.15  | 1.86  | 2.10E-03 | 4.87E-02 |
| 4 | 1096 | F2-3 vs. M2-3 | F2-3 up | + | export across plasma membrane                                 | GO:0140115 | Metabolism             | Transporters  | P | 15   | 5   | 0.34   | 14.86 | 5.90E-05 | 4.36E-03 |
| 4 | 1097 | F2-3 vs. M2-3 | F2-3 up | + | fluid transport                                               | GO:0042044 | Metabolism             | Transporters  | P | 30   | 5   | 0.67   | 7.43  | 9.42E-04 | 3.31E-02 |
| 4 | 1098 | F2-3 vs. M2-3 | F2-3 up | + | inorganic cation transmembrane transport                      | GO:0098662 | Metabolism             | Transporters  | P | 223  | 16  | 5      | 3.2   | 8.50E-05 | 5.84E-03 |
| 4 | 1099 | F2-3 vs. M2-3 | F2-3 up | + | inorganic cation transmembrane transporter activity           | GO:0022890 | Metabolism             | Transporters  | F | 382  | 23  | 8.57   | 2.68  | 3.68E-05 | 3.82E-03 |
| 4 | 1100 | F2-3 vs. M2-3 | F2-3 up | + | inorganic ion transmembrane transport                         | GO:0098660 | Metabolism             | Transporters  | P | 244  | 16  | 5.47   | 2.92  | 2.24E-04 | 1.24E-02 |
| 4 | 1101 | F2-3 vs. M2-3 | F2-3 up | + | inorganic molecular entity transmembrane transporter activity | GO:0015318 | Metabolism             | Transporters  | F | 664  | 41  | 14.89  | 2.75  | 1.89E-08 | 6.75E-06 |
| 4 | 1102 | F2-3 vs. M2-3 | F2-3 up | + | ion transmembrane transport                                   | GO:0034220 | Metabolism             | Transporters  | P | 330  | 22  | 7.4    | 2.97  | 1.27E-05 | 1.51E-03 |
| 4 | 1103 | F2-3 vs. M2-3 | F2-3 up | + | ion transmembrane transporter activity                        | GO:0015075 | Metabolism             | Transporters  | F | 718  | 41  | 16.11  | 2.55  | 1.79E-07 | 4.43E-05 |

|   |      |               |         |   |                                                                   |            |                        |               |   |       |     |       |       |          |          |
|---|------|---------------|---------|---|-------------------------------------------------------------------|------------|------------------------|---------------|---|-------|-----|-------|-------|----------|----------|
| 4 |      | F2-3 vs. M2-3 | F2-3 up | + | ion transmembrane transporter activity, phosphorylative mechanism | GO:0015662 |                        |               |   |       |     |       | 8.02  | 5.25E-06 | 7.67E-04 |
|   | 1104 |               |         |   |                                                                   |            | Metabolism             | Transporters  | F | 50    | 9   | 1.12  |       |          |          |
| 4 | 1105 | F2-3 vs. M2-3 | F2-3 up | + | ion transport                                                     | GO:0006811 | Metabolism             | Transporters  | P | 673   | 39  | 15.1  | 2.58  | 3.13E-07 | 7.79E-05 |
| 4 |      | F2-3 vs. M2-3 | F2-3 up | + | monovalent inorganic cation transmembrane transporter activity    | GO:0015077 |                        |               |   |       |     |       | 2.84  | 7.15E-04 | 4.10E-02 |
|   | 1106 |               |         |   |                                                                   |            | Metabolism             | Transporters  | F | 220   | 14  | 4.94  |       |          |          |
| 4 | 1107 | F2-3 vs. M2-3 | F2-3 up | + | one-carbon compound transport                                     | GO:0019755 | Metabolism             | Transporters  | P | 7     | 3   | 0.16  | 19.11 | 1.12E-03 | 3.63E-02 |
| 4 | 1108 | F2-3 vs. M2-3 | F2-3 up | + | plasmodesma                                                       | GO:0009506 | Metabolism             | Transporters  | C | 944   | 48  | 21.18 | 2.27  | 3.73E-07 | 1.62E-05 |
| 4 | 1109 | F2-3 vs. M2-3 | F2-3 up | + | primary active transmembrane transporter                          | GO:0015399 | Metabolism             | Transporters  | F | 213   | 18  | 4.78  | 3.77  | 3.97E-06 | 6.08E-04 |
| 4 | 1110 | F2-3 vs. M2-3 | F2-3 up | + | proton transmembrane transporter activity                         | GO:0015078 | Metabolism             | Transporters  | F | 166   | 13  | 3.72  | 3.49  | 1.73E-04 | 1.33E-02 |
| 4 | 1111 | F2-3 vs. M2-3 | F2-3 up | + | trans-Golgi network                                               | GO:0005802 | Metabolism             | Transporters  | C | 302   | 19  | 6.77  | 2.8   | 1.00E-04 | 2.98E-03 |
| 4 | 1112 | F2-3 vs. M2-3 | F2-3 up | + | transmembrane transport                                           | GO:0055085 | Metabolism             | Transporters  | P | 859   | 52  | 19.27 | 2.7   | 4.19E-10 | 2.28E-07 |
| 4 | 1113 | F2-3 vs. M2-3 | F2-3 up | + | transmembrane transporter activity                                | GO:0022857 | Metabolism             | Transporters  | F | 1242  | 66  | 27.86 | 2.37  | 3.70E-10 | 1.70E-07 |
| 4 | 1114 | F2-3 vs. M2-3 | F2-3 up | + | transport                                                         | GO:0006810 | Metabolism             | Transporters  | P | 2261  | 89  | 50.72 | 1.75  | 4.33E-07 | 1.04E-04 |
| 4 | 1115 | F2-3 vs. M2-3 | F2-3 up | + | transporter activity                                              | GO:0005215 | Metabolism             | Transporters  | F | 1287  | 70  | 28.87 | 2.42  | 3.32E-11 | 2.67E-08 |
| 4 | 1116 | F2-3 vs. M2-3 | F2-3 up | + | urea transmembrane transporter activity                           | GO:0015204 | Metabolism             | Transporters  | F | 6     | 4   | 0.13  | 29.72 | 4.34E-05 | 4.10E-03 |
| 4 | 1117 | F2-3 vs. M2-3 | F2-3 up | + | urea transport                                                    | GO:0015840 | Metabolism             | Transporters  | P | 5     | 3   | 0.11  | 26.75 | 5.42E-04 | 2.33E-02 |
| 4 | 1118 | F2-3 vs. M2-3 | F2-3 up | + | vesicle                                                           | GO:0031982 | Metabolism             | Transporters  | C | 817   | 34  | 18.33 | 1.86  | 7.94E-04 | 1.92E-02 |
| 4 | 1119 | F2-3 vs. M2-3 | F2-3 up | + | water channel activity                                            | GO:0015250 | Metabolism             | Transporters  | F | 36    | 7   | 0.81  | 8.67  | 3.84E-05 | 3.74E-03 |
| 4 | 1120 | F2-3 vs. M2-3 | F2-3 up | + | water transmembrane transporter activity                          | GO:0005372 | Metabolism             | Transporters  | F | 36    | 7   | 0.81  | 8.67  | 3.84E-05 | 3.86E-03 |
| 4 | 1121 | F2-3 vs. M2-3 | F2-3 up | + | water transport                                                   | GO:0006833 | Metabolism             | Transporters  | P | 30    | 5   | 0.67  | 7.43  | 9.42E-04 | 3.33E-02 |
| 4 | 1122 | F2-3 vs. M2-3 | M2-3 up | + | primary metabolic process                                         | GO:0044238 | Metabolism             | Bioenergetics | P | 7219  | 81  | 55.03 | 1.47  | 1.02E-04 | 3.83E-02 |
| 4 | 1123 | F2-3 vs. M2-3 | M2-3 up | + | DNA biosynthetic process                                          | GO:0071897 | Development            | Cell division | P | 25    | 5   | 0.19  | 26.24 | 2.89E-06 | 8.63E-03 |
| 4 | 1124 | F2-3 vs. M2-3 | M2-3 up | + | DNA repair                                                        | GO:0006281 | Development            | Cell division | P | 315   | 11  | 2.4   | 4.58  | 4.19E-05 | 2.79E-02 |
| 4 | 1125 | F2-3 vs. M2-3 | M2-3 up | + | double-strand break repair                                        | GO:0006302 | Development            | Cell division | P | 126   | 7   | 0.96  | 7.29  | 7.13E-05 | 3.28E-02 |
| 4 | 1126 | F2-3 vs. M2-3 | M2-3 up | + | carpel development                                                | GO:0048440 | Development            | Development   | P | 78    | 6   | 0.59  | 10.09 | 4.34E-05 | 2.60E-02 |
| 4 | 1127 | F2-3 vs. M2-3 | M2-3 up | + | cellular process                                                  | GO:0009987 | Development            | Development   | P | 12008 | 127 | 91.54 | 1.39  | 1.12E-06 | 6.71E-03 |
| 4 | 1128 | F2-3 vs. M2-3 | M2-3 up | + | cytosol                                                           | GO:0005829 | Development            | Development   | C | 3241  | 47  | 24.71 | 1.9   | 1.39E-05 | 1.45E-02 |
| 4 | 1129 | F2-3 vs. M2-3 | M2-3 up | + | floral whorl development                                          | GO:0048438 | Development            | Development   | P | 195   | 8   | 1.49  | 5.38  | 1.66E-04 | 4.95E-02 |
| 4 | 1130 | F2-3 vs. M2-3 | M2-3 up | + | gynoecium development                                             | GO:0048467 | Development            | Development   | P | 91    | 7   | 0.69  | 10.09 | 9.91E-06 | 1.19E-02 |
| 4 | 1131 | F2-3 vs. M2-3 | M2-3 up | + | intracellular non-membrane-bounded organelle                      | GO:0043232 | Development            | Development   | C | 1755  | 28  | 13.38 | 2.09  | 2.99E-04 | 4.44E-02 |
| 4 | 1132 | F2-3 vs. M2-3 | M2-3 up | + | intracellular organelle lumen                                     | GO:0070013 | Development            | Development   | C | 1386  | 24  | 10.57 | 2.27  | 1.99E-04 | 5.18E-02 |
| 4 | 1133 | F2-3 vs. M2-3 | M2-3 up | + | membrane-enclosed lumen                                           | GO:0031974 | Development            | Development   | C | 1386  | 24  | 10.57 | 2.27  | 1.99E-04 | 4.14E-02 |
| 4 | 1134 | F2-3 vs. M2-3 | M2-3 up | + | non-membrane-bounded organelle                                    | GO:0043228 | Development            | Development   | C | 1755  | 28  | 13.38 | 2.09  | 2.99E-04 | 3.89E-02 |
| 4 | 1135 | F2-3 vs. M2-3 | M2-3 up | + | nuclear lumen                                                     | GO:0031981 | Development            | Development   | C | 1222  | 23  | 9.32  | 2.47  | 7.55E-05 | 2.62E-02 |
| 4 | 1136 | F2-3 vs. M2-3 | M2-3 up | + | nucleus                                                           | GO:0005634 | Development            | Development   | C | 10540 | 111 | 80.35 | 1.38  | 2.26E-05 | 1.18E-02 |
| 4 | 1137 | F2-3 vs. M2-3 | M2-3 up | + | organelle lumen                                                   | GO:0043233 | Development            | Development   | C | 1386  | 24  | 10.57 | 2.27  | 1.99E-04 | 3.45E-02 |
| 4 | 1138 | F2-3 vs. M2-3 | M2-3 up | + | phyllome development                                              | GO:0048827 | Development            | Development   | P | 495   | 14  | 3.77  | 3.71  | 3.68E-05 | 3.14E-02 |
| 4 | 1139 | F2-3 vs. M2-3 | M2-3 up | + | plant organ development                                           | GO:0099402 | Development            | Development   | P | 1009  | 22  | 7.69  | 2.86  | 1.28E-05 | 1.27E-02 |
| 4 | 1140 | F2-3 vs. M2-3 | M2-3 up | + | plant ovule development                                           | GO:0048481 | Development            | Development   | P | 55    | 6   | 0.42  | 14.31 | 6.85E-06 | 1.37E-02 |
| 4 | 1141 | F2-3 vs. M2-3 | M2-3 up | + | plant-type ovary development                                      | GO:0035670 | Development            | Development   | P | 57    | 6   | 0.43  | 13.81 | 8.28E-06 | 1.24E-02 |
| 4 | 1142 | F2-3 vs. M2-3 | M2-3 up | + | shoot system development                                          | GO:0048367 | Development            | Development   | P | 728   | 17  | 5.55  | 3.06  | 5.72E-05 | 2.85E-02 |
| 4 | 1143 | F2-3 vs. M2-3 | M2-3 up | + | system development                                                | GO:0048731 | Development            | Development   | P | 1867  | 30  | 14.23 | 2.11  | 1.47E-04 | 4.61E-02 |
| 4 | 1144 | F2-3 vs. M2-3 | M2-3 up | + | binding                                                           | GO:0005488 | Metabolism             | Metabolism    | F | 9843  | 108 | 75.04 | 1.44  | 4.33E-06 | 6.95E-03 |
| 4 | 1145 | F2-3 vs. M2-3 | M2-3 up | + | cellular macromolecule metabolic process                          | GO:0044260 | Metabolism             | Metabolism    | P | 4426  | 56  | 33.74 | 1.66  | 9.74E-05 | 3.88E-02 |
| 4 | 1146 | F2-3 vs. M2-3 | M2-3 up | + | macromolecule metabolic process                                   | GO:0043170 | Metabolism             | Metabolism    | P | 5496  | 66  | 41.9  | 1.58  | 8.65E-05 | 3.69E-02 |
| 4 | 1147 | F2-3 vs. M2-3 | M2-3 up | + | metabolic process                                                 | GO:0008152 | Metabolism             | Metabolism    | P | 8681  | 93  | 66.18 | 1.41  | 1.30E-04 | 4.31E-02 |
| 4 | 1148 | F2-3 vs. M2-3 | M2-3 up | + | organic cyclic compound metabolic process                         | GO:1901360 | Metabolism             | Metabolism    | P | 2607  | 39  | 19.87 | 1.96  | 4.68E-05 | 2.54E-02 |
| 4 | 1149 | F2-3 vs. M2-3 | M2-3 up | + | organic substance metabolic process                               | GO:0071704 | Metabolism             | Metabolism    | P | 7851  | 88  | 59.85 | 1.47  | 4.18E-05 | 3.12E-02 |
| 4 | 1150 | F2-3 vs. M2-3 | M2-3 up | + | protein binding                                                   | GO:0005515 | Metabolism             | Metabolism    | F | 5446  | 72  | 41.52 | 1.73  | 8.59E-07 | 2.76E-03 |
| 4 | 1151 | F2-3 vs. M2-3 | M2-3 up | + | cellular response to DNA damage stimulus                          | GO:0006974 | Signaling and response | Stress        | P | 350   | 11  | 2.67  | 4.12  | 1.04E-04 | 3.66E-02 |
| 5 | 1152 | L2-3 vs. S2-3 | L2-3 up | + | organelle subcompartment                                          | GO:0031984 | Development            | Development   | C | 1156  | 14  | 3.88  | 3.61  | 3.34E-05 | 3.47E-02 |
| 5 | 1153 | L2-3 vs. S2-3 | L2-3 up | + | metabolic process                                                 | GO:0008152 | Metabolism             | Metabolism    | P | 8681  | 50  | 29.13 | 1.72  | 8.28E-06 | 4.95E-02 |
| 5 | 1154 | L2-3 vs. S2-3 | S2-3 up | + | cytochrome complex                                                | GO:0070069 | Metabolism             | Bioenergetics | C | 30    | 5   | 0.24  | 21.15 | 7.47E-06 | 5.19E-04 |
| 5 | 1155 | L2-3 vs. S2-3 | S2-3 up | + | inner mitochondrial membrane protein complex                      | GO:0098800 | Metabolism             | Bioenergetics | C | 177   | 8   | 1.39  | 5.74  | 1.10E-04 | 4.56E-03 |
| 5 | 1156 | L2-3 vs. S2-3 | S2-3 up | + | mitochondrial envelope                                            | GO:0005740 | Metabolism             | Bioenergetics | C | 317   | 12  | 2.5   | 4.8   | 1.20E-05 | 7.37E-04 |
| 5 | 1157 | L2-3 vs. S2-3 | S2-3 up | + | mitochondrial inner membrane                                      | GO:0005743 | Metabolism             | Bioenergetics | C | 245   | 10  | 1.93  | 5.18  | 3.52E-05 | 1.83E-03 |
| 5 | 1158 | L2-3 vs. S2-3 | S2-3 up | + | mitochondrial membrane                                            | GO:0031966 | Metabolism             | Bioenergetics | C | 297   | 11  | 2.34  | 4.7   | 3.38E-05 | 1.85E-03 |
| 5 | 1159 | L2-3 vs. S2-3 | S2-3 up | + | mitochondrial protein complex                                     | GO:0098798 | Metabolism             | Bioenergetics | C | 259   | 12  | 2.04  | 5.88  | 1.67E-06 | 1.34E-04 |
| 5 | 1160 | L2-3 vs. S2-3 | S2-3 up | + | mitochondrial respirasome                                         | GO:0005746 | Metabolism             | Bioenergetics | C | 111   | 7   | 0.87  | 8     | 4.09E-05 | 1.94E-03 |
| 5 | 1161 | L2-3 vs. S2-3 | S2-3 up | + | mitochondrial respiratory chain complex III                       | GO:0005750 | Metabolism             | Bioenergetics | C | 19    | 5   | 0.15  | 33.4  | 1.05E-06 | 9.93E-05 |
| 5 | 1162 | L2-3 vs. S2-3 | S2-3 up | + | oxidoreductase activity, acting on diphenols and                  | GO:0016681 | Metabolism             | Bioenergetics | F | 7     | 3   | 0.06  | 54.4  | 5.43E-05 | 4.36E-02 |
| 5 | 1163 | L2-3 vs. S2-3 | S2-3 up | + | oxidoreductase complex                                            | GO:1990204 | Metabolism             | Bioenergetics | C | 161   | 9   | 1.27  | 7.1   | 8.20E-06 | 5.33E-04 |

|   |      |               |         |   |                                                 |            |             |               |   |       |     |        |       |          |          |
|---|------|---------------|---------|---|-------------------------------------------------|------------|-------------|---------------|---|-------|-----|--------|-------|----------|----------|
| 5 | 1164 | L2-3 vs. S2-3 | S2-3 up | + | respirasome                                     | GO:0070469 | Metabolism  | Bioenergetics | C | 116   | 7   | 0.91   | 7.66  | 5.34E-05 | 2.31E-03 |
| 5 | 1165 | L2-3 vs. S2-3 | S2-3 up | + | respiratory chain complex                       | GO:0098803 | Metabolism  | Bioenergetics | C | 109   | 7   | 0.86   | 8.15  | 3.67E-05 | 1.82E-03 |
| 5 | 1166 | L2-3 vs. S2-3 | S2-3 up | + | respiratory chain complex III                   | GO:0045275 | Metabolism  | Bioenergetics | C | 19    | 5   | 0.15   | 33.4  | 1.05E-06 | 9.10E-05 |
| 5 | 1167 | L2-3 vs. S2-3 | S2-3 up | + | ubiquinol-cytochrome-c reductase activity       | GO:0008121 | Metabolism  | Bioenergetics | F | 7     | 3   | 0.06   | 54.4  | 5.43E-05 | 3.49E-02 |
| 5 | 1168 | L2-3 vs. S2-3 | S2-3 up | + | protein-containing complex                      | GO:0032991 | Metabolism  | Catabolism    | C | 2958  | 53  | 23.3   | 2.27  | 1.53E-08 | 1.76E-06 |
| 5 | 1169 | L2-3 vs. S2-3 | S2-3 up | + | cellular process                                | GO:0009987 | Development | Development   | P | 12008 | 124 | 94.61  | 1.31  | 7.98E-05 | 2.17E-02 |
| 5 | 1170 | L2-3 vs. S2-3 | S2-3 up | + | cytoplasm                                       | GO:0005737 | Development | Development   | C | 14837 | 142 | 116.89 | 1.21  | 5.93E-04 | 2.20E-02 |
| 5 | 1171 | L2-3 vs. S2-3 | S2-3 up | + | cytosol                                         | GO:0005829 | Development | Development   | C | 3241  | 55  | 25.53  | 2.15  | 3.62E-08 | 3.77E-06 |
| 5 | 1172 | L2-3 vs. S2-3 | S2-3 up | + | intracellular non-membrane-bounded organelle    | GO:0043232 | Development | Development   | C | 1755  | 42  | 13.83  | 3.04  | 1.44E-10 | 2.14E-08 |
| 5 | 1173 | L2-3 vs. S2-3 | S2-3 up | + | non-membrane-bounded organelle                  | GO:0043228 | Development | Development   | C | 1755  | 42  | 13.83  | 3.04  | 1.44E-10 | 1.87E-08 |
| 5 | 1174 | L2-3 vs. S2-3 | S2-3 up | + | organelle inner membrane                        | GO:0019866 | Development | Development   | C | 311   | 10  | 2.45   | 4.08  | 2.34E-04 | 9.36E-03 |
| 5 | 1175 | L2-3 vs. S2-3 | S2-3 up | + | organelle membrane                              | GO:0031090 | Development | Development   | C | 1458  | 27  | 11.49  | 2.35  | 4.69E-05 | 2.12E-03 |
| 5 | 1176 | L2-3 vs. S2-3 | S2-3 up | + | plant-type cell wall organization               | GO:0009664 | Development | Development   | P | 150   | 8   | 1.18   | 6.77  | 3.61E-05 | 1.20E-02 |
| 5 | 1177 | L2-3 vs. S2-3 | S2-3 up | + | structural molecule activity                    | GO:0005198 | Development | Development   | F | 443   | 25  | 3.49   | 7.16  | 4.95E-14 | 1.59E-10 |
| 5 | 1178 | L2-3 vs. S2-3 | S2-3 up | + | vacuole                                         | GO:0005773 | Development | Development   | C | 1083  | 20  | 8.53   | 2.34  | 5.87E-04 | 2.26E-02 |
| 5 | 1179 | L2-3 vs. S2-3 | S2-3 up | + | amide biosynthetic process                      | GO:0043604 | Metabolism  | Metabolism    | P | 591   | 27  | 4.66   | 5.8   | 5.46E-13 | 8.17E-10 |
| 5 | 1180 | L2-3 vs. S2-3 | S2-3 up | + | biosynthetic process                            | GO:0009058 | Metabolism  | Metabolism    | P | 2811  | 48  | 22.15  | 2.17  | 4.06E-07 | 1.87E-04 |
| 5 | 1181 | L2-3 vs. S2-3 | S2-3 up | + | cellular amide metabolic process                | GO:0043603 | Metabolism  | Metabolism    | P | 722   | 28  | 5.69   | 4.92  | 8.40E-12 | 1.00E-08 |
| 5 | 1182 | L2-3 vs. S2-3 | S2-3 up | + | cellular biosynthetic process                   | GO:0044249 | Metabolism  | Metabolism    | P | 2583  | 46  | 20.35  | 2.26  | 1.56E-07 | 9.36E-05 |
| 5 | 1183 | L2-3 vs. S2-3 | S2-3 up | + | cellular macromolecule biosynthetic process     | GO:0034645 | Metabolism  | Metabolism    | P | 1279  | 33  | 10.08  | 3.27  | 3.04E-09 | 3.03E-06 |
| 5 | 1184 | L2-3 vs. S2-3 | S2-3 up | + | cellular nitrogen compound biosynthetic process | GO:0044271 | Metabolism  | Metabolism    | P | 1241  | 32  | 9.78   | 3.27  | 5.52E-09 | 4.71E-06 |
| 5 | 1185 | L2-3 vs. S2-3 | S2-3 up | + | cellular nitrogen compound metabolic process    | GO:0034641 | Metabolism  | Metabolism    | P | 2872  | 43  | 22.63  | 1.9   | 4.70E-05 | 1.48E-02 |
| 5 | 1186 | L2-3 vs. S2-3 | S2-3 up | + | macromolecule biosynthetic process              | GO:0009059 | Metabolism  | Metabolism    | P | 1334  | 33  | 10.51  | 3.14  | 8.30E-09 | 6.20E-06 |
| 5 | 1187 | L2-3 vs. S2-3 | S2-3 up | + | organic substance biosynthetic process          | GO:1901576 | Metabolism  | Metabolism    | P | 2674  | 45  | 21.07  | 2.14  | 1.42E-06 | 6.08E-04 |
| 5 | 1188 | L2-3 vs. S2-3 | S2-3 up | + | organonitrogen compound biosynthetic process    | GO:1901566 | Metabolism  | Metabolism    | P | 1343  | 33  | 10.58  | 3.12  | 9.73E-09 | 6.46E-06 |
| 5 | 1189 | L2-3 vs. S2-3 | S2-3 up | + | peptide metabolic process                       | GO:0006518 | Metabolism  | Metabolism    | P | 585   | 28  | 4.61   | 6.08  | 6.61E-14 | 1.32E-10 |
| 5 | 1190 | L2-3 vs. S2-3 | S2-3 up | + | gene expression                                 | GO:0010467 | Regulation  | Transcription | P | 1608  | 34  | 12.67  | 2.68  | 1.95E-07 | 1.06E-04 |
| 5 | 1191 | L2-3 vs. S2-3 | S2-3 up | + | cytosolic large ribosomal subunit               | GO:0022625 | Regulation  | Translation   | C | 131   | 14  | 1.03   | 13.56 | 9.22E-12 | 1.92E-09 |
| 5 | 1192 | L2-3 vs. S2-3 | S2-3 up | + | cytosolic ribosome                              | GO:0022626 | Regulation  | Translation   | C | 303   | 23  | 2.39   | 9.63  | 1.50E-15 | 5.20E-13 |
| 5 | 1193 | L2-3 vs. S2-3 | S2-3 up | + | cytosolic small ribosomal subunit               | GO:0022627 | Regulation  | Translation   | C | 102   | 7   | 0.8    | 8.71  | 2.46E-05 | 1.42E-03 |
| 5 | 1194 | L2-3 vs. S2-3 | S2-3 up | + | large ribosomal subunit                         | GO:0015934 | Regulation  | Translation   | C | 180   | 16  | 1.42   | 11.28 | 3.89E-12 | 1.01E-09 |
| 5 | 1195 | L2-3 vs. S2-3 | S2-3 up | + | mRNA binding                                    | GO:0003729 | Regulation  | Translation   | F | 1005  | 22  | 7.92   | 2.78  | 2.01E-05 | 2.16E-02 |
| 5 | 1196 | L2-3 vs. S2-3 | S2-3 up | + | peptide biosynthetic process                    | GO:0043043 | Regulation  | Translation   | P | 518   | 27  | 4.08   | 6.62  | 2.77E-14 | 8.28E-11 |
| 5 | 1197 | L2-3 vs. S2-3 | S2-3 up | + | ribonucleoprotein complex                       | GO:1990904 | Regulation  | Translation   | C | 677   | 27  | 5.33   | 5.06  | 1.11E-11 | 1.92E-09 |
| 5 | 1198 | L2-3 vs. S2-3 | S2-3 up | + | ribonucleoprotein complex assembly              | GO:0022618 | Regulation  | Translation   | P | 163   | 8   | 1.28   | 6.23  | 6.32E-05 | 1.89E-02 |
| 5 | 1199 | L2-3 vs. S2-3 | S2-3 up | + | ribonucleoprotein complex biogenesis            | GO:0022613 | Regulation  | Translation   | P | 447   | 15  | 3.52   | 4.26  | 4.02E-06 | 1.60E-03 |
| 5 | 1200 | L2-3 vs. S2-3 | S2-3 up | + | ribonucleoprotein complex subunit organization  | GO:0071826 | Regulation  | Translation   | P | 166   | 8   | 1.31   | 6.12  | 7.14E-05 | 2.03E-02 |
| 5 | 1201 | L2-3 vs. S2-3 | S2-3 up | + | ribosomal large subunit biogenesis              | GO:0042273 | Regulation  | Translation   | P | 109   | 9   | 0.86   | 10.48 | 3.95E-07 | 1.97E-04 |
| 5 | 1202 | L2-3 vs. S2-3 | S2-3 up | + | ribosomal subunit                               | GO:0044391 | Regulation  | Translation   | C | 316   | 25  | 2.49   | 10.04 | 3.31E-17 | 3.45E-14 |
| 5 | 1203 | L2-3 vs. S2-3 | S2-3 up | + | ribosome                                        | GO:0005840 | Regulation  | Translation   | C | 399   | 27  | 3.14   | 8.59  | 6.59E-17 | 3.43E-14 |
| 5 | 1204 | L2-3 vs. S2-3 | S2-3 up | + | ribosome assembly                               | GO:0042255 | Regulation  | translation   | P | 90    | 7   | 0.71   | 9.87  | 1.15E-05 | 4.03E-03 |
| 5 | 1205 | L2-3 vs. S2-3 | S2-3 up | + | ribosome biogenesis                             | GO:0042254 | Regulation  | Translation   | P | 370   | 13  | 2.92   | 4.46  | 1.12E-05 | 4.19E-03 |
| 5 | 1206 | L2-3 vs. S2-3 | S2-3 up | + | small ribosomal subunit                         | GO:0015935 | Regulation  | Translation   | C | 136   | 9   | 1.07   | 8.4   | 2.23E-06 | 1.66E-04 |
| 5 | 1207 | L2-3 vs. S2-3 | S2-3 up | + | structural constituent of ribosome              | GO:0003735 | Regulation  | Translation   | F | 325   | 22  | 2.56   | 8.59  | 5.70E-14 | 9.16E-11 |
| 5 | 1208 | L2-3 vs. S2-3 | S2-3 up | + | translation                                     | GO:0006412 | Regulation  | Translation   | P | 513   | 27  | 4.04   | 6.68  | 2.22E-14 | 1.33E-10 |
| 6 | 1209 | M2-3 vs. S2-3 | M2-3 up | + | cytosol                                         | GO:0005829 | Development | Development   | C | 3241  | 26  | 10.28  | 2.53  | 5.53E-06 | 5.75E-03 |
| 6 | 1210 | M2-3 vs. S2-3 | M2-3 up | + | biosynthetic process                            | GO:0009058 | Metabolism  | Metabolism    | P | 2811  | 23  | 8.92   | 2.58  | 1.67E-05 | 3.33E-02 |
| 6 | 1211 | M2-3 vs. S2-3 | M2-3 up | + | cellular metabolic process                      | GO:0044237 | Metabolism  | Metabolism    | P | 7649  | 46  | 24.27  | 1.9   | 9.90E-07 | 2.96E-03 |
| 6 | 1212 | M2-3 vs. S2-3 | M2-3 up | + | metabolic process                               | GO:0008152 | Metabolism  | Metabolism    | P | 8681  | 50  | 27.55  | 1.82  | 7.58E-07 | 4.53E-03 |
| 6 | 1213 | M2-3 vs. S2-3 | S2-3 up | + | oxidoreductase complex                          | GO:1990204 | Metabolism  | Bioenergetics | C | 161   | 7   | 1.04   | 6.73  | 1.10E-04 | 1.27E-02 |
| 6 | 1214 | M2-3 vs. S2-3 | S2-3 up | + | cytosol                                         | GO:0005829 | Development | Development   | C | 3241  | 50  | 20.92  | 2.39  | 3.45E-09 | 3.59E-06 |
| 6 | 1215 | M2-3 vs. S2-3 | S2-3 up | + | intracellular non-membrane-bounded organelle    | GO:0043232 | Development | Development   | C | 1755  | 26  | 11.33  | 2.29  | 7.99E-05 | 1.19E-02 |
| 6 | 1216 | M2-3 vs. S2-3 | S2-3 up | + | microtubule                                     | GO:0005874 | Development | Development   | C | 145   | 6   | 0.94   | 6.41  | 4.42E-04 | 4.60E-02 |
| 6 | 1217 | M2-3 vs. S2-3 | S2-3 up | + | non-membrane-bounded organelle                  | GO:0043228 | Development | Development   | C | 1755  | 26  | 11.33  | 2.29  | 7.99E-05 | 1.04E-02 |
| 6 | 1218 | M2-3 vs. S2-3 | S2-3 up | + | polymeric cytoskeletal fiber                    | GO:0099513 | Development | Development   | C | 155   | 6   | 1      | 6     | 6.20E-04 | 5.38E-02 |
| 6 | 1219 | M2-3 vs. S2-3 | S2-3 up | + | structural molecule activity                    | GO:0005198 | Development | Development   | F | 443   | 14  | 2.86   | 4.9   | 1.65E-06 | 5.31E-03 |
| 6 | 1220 | M2-3 vs. S2-3 | S2-3 up | + | amide biosynthetic process                      | GO:0043604 | Metabolism  | Metabolism    | P | 591   | 14  | 3.82   | 3.67  | 3.88E-05 | 5.80E-02 |
| 6 | 1221 | M2-3 vs. S2-3 | S2-3 up | + | cellular amide metabolic process                | GO:0043603 | Metabolism  | Metabolism    | P | 722   | 16  | 4.66   | 3.43  | 2.37E-05 | 7.10E-02 |
| 6 | 1222 | M2-3 vs. S2-3 | S2-3 up | + | peptide metabolic process                       | GO:0006518 | Metabolism  | Metabolism    | P | 585   | 15  | 3.78   | 3.97  | 8.25E-06 | 4.94E-02 |
| 6 | 1223 | M2-3 vs. S2-3 | S2-3 up | + | supramolecular fiber                            | GO:0099512 | Metabolism  | Metabolism    | C | 155   | 6   | 1      | 6     | 6.20E-04 | 4.97E-02 |
| 6 | 1224 | M2-3 vs. S2-3 | S2-3 up | + | supramolecular polymer                          | GO:0099081 | Metabolism  | Metabolism    | C | 155   | 6   | 1      | 6     | 6.20E-04 | 5.87E-02 |
| 6 | 1225 | M2-3 vs. S2-3 | S2-3 up | + | cytosolic ribosome                              | GO:0022626 | Regulation  | Translation   | C | 303   | 13  | 1.96   | 6.65  | 1.45E-07 | 7.57E-05 |

|   |      |               |         |   |                                                                                                |            |            |               |   |      |     |       |       |          |          |
|---|------|---------------|---------|---|------------------------------------------------------------------------------------------------|------------|------------|---------------|---|------|-----|-------|-------|----------|----------|
| 6 | 1226 | M2-3 vs. S2-3 | S2-3 up | + | cytosolic small ribosomal subunit                                                              | GO:0022627 | Regulation | Translation   | C | 102  | 7   | 0.66  | 10.63 | 6.82E-06 | 1.42E-03 |
| 6 | 1227 | M2-3 vs. S2-3 | S2-3 up | + | peptide biosynthetic process                                                                   | GO:0043043 | Regulation | Translation   | P | 518  | 13  | 3.34  | 3.89  | 4.17E-05 | 4.99E-02 |
| 6 | 1228 | M2-3 vs. S2-3 | S2-3 up | + | ribosomal subunit                                                                              | GO:0044391 | Regulation | Translation   | C | 316  | 12  | 2.04  | 5.88  | 1.53E-06 | 5.30E-04 |
| 6 | 1229 | M2-3 vs. S2-3 | S2-3 up | + | ribosome                                                                                       | GO:0005840 | Regulation | Translation   | C | 399  | 13  | 2.58  | 5.05  | 2.85E-06 | 7.42E-04 |
| 6 | 1230 | M2-3 vs. S2-3 | S2-3 up | + | small ribosomal subunit                                                                        | GO:0015935 | Regulation | Translation   | C | 136  | 7   | 0.88  | 7.97  | 3.99E-05 | 6.91E-03 |
| 6 | 1231 | M2-3 vs. S2-3 | S2-3 up | + | translation                                                                                    | GO:0006412 | Regulation | Translation   | P | 513  | 13  | 3.31  | 3.93  | 3.79E-05 | 7.54E-02 |
| 7 | 1232 | F2-3 vs. S2-3 | F2-3 up | + | ADP metabolic process                                                                          | GO:0046031 | Metabolism | Bioenergetics | P | 56   | 9   | 2.66  | 3.38  | 2.56E-03 | 4.42E-02 |
| 7 | 1233 | F2-3 vs. S2-3 | F2-3 up | + | aerobic respiration                                                                            | GO:0009060 | Metabolism | Bioenergetics | P | 89   | 22  | 4.23  | 5.21  | 4.62E-09 | 3.95E-07 |
| 7 | 1234 | F2-3 vs. S2-3 | F2-3 up | + | alcohol dehydrogenase (NADP+) activity                                                         | GO:0008106 | Metabolism | Bioenergetics | F | 14   | 5   | 0.66  | 7.52  | 1.30E-03 | 3.56E-02 |
| 7 | 1235 | F2-3 vs. S2-3 | F2-3 up | + | aldehyde dehydrogenase (NAD+) activity                                                         | GO:0004029 | Metabolism | Bioenergetics | F | 12   | 7   | 0.57  | 12.28 | 1.21E-05 | 6.06E-04 |
| 7 | 1236 | F2-3 vs. S2-3 | F2-3 up | + | aldehyde dehydrogenase [NAD(P)+] activity                                                      | GO:0004030 | Metabolism | Bioenergetics | F | 12   | 7   | 0.57  | 12.28 | 1.21E-05 | 6.16E-04 |
| 7 | 1237 | F2-3 vs. S2-3 | F2-3 up | + | aldo-keto reductase (NADP) activity                                                            | GO:0004033 | Metabolism | Bioenergetics | F | 15   | 5   | 0.71  | 7.02  | 1.67E-03 | 4.42E-02 |
| 7 | 1238 | F2-3 vs. S2-3 | F2-3 up | + | ATP metabolic process                                                                          | GO:0046034 | Metabolism | Bioenergetics | P | 144  | 19  | 6.84  | 2.78  | 1.57E-04 | 4.06E-03 |
| 7 | 1239 | F2-3 vs. S2-3 | F2-3 up | + | ATPase activity                                                                                | GO:0016887 | Metabolism | Bioenergetics | F | 512  | 44  | 24.32 | 1.81  | 4.03E-04 | 1.28E-02 |
| 7 | 1240 | F2-3 vs. S2-3 | F2-3 up | + | ATPase activity, coupled to transmembrane movement of ions, rotational mechanism               | GO:0044769 | Metabolism | Bioenergetics | F | 25   | 8   | 1.19  | 6.74  | 8.79E-05 | 3.53E-03 |
| 7 | 1241 | F2-3 vs. S2-3 | F2-3 up | + | carbohydrate biosynthetic process                                                              | GO:0016051 | Metabolism | Bioenergetics | P | 303  | 50  | 14.39 | 3.47  | 9.55E-13 | 1.36E-10 |
| 7 | 1242 | F2-3 vs. S2-3 | F2-3 up | + | carbohydrate catabolic process                                                                 | GO:0016052 | Metabolism | Bioenergetics | P | 234  | 44  | 11.11 | 3.96  | 4.69E-13 | 7.38E-11 |
| 7 | 1243 | F2-3 vs. S2-3 | F2-3 up | + | carbohydrate derivative binding                                                                | GO:0097367 | Metabolism | Bioenergetics | F | 858  | 65  | 40.75 | 1.6   | 5.03E-04 | 1.57E-02 |
| 7 | 1244 | F2-3 vs. S2-3 | F2-3 up | + | carbohydrate derivative biosynthetic process                                                   | GO:1901137 | Metabolism | Bioenergetics | P | 458  | 45  | 21.75 | 2.07  | 1.79E-05 | 6.37E-04 |
| 7 | 1245 | F2-3 vs. S2-3 | F2-3 up | + | carbohydrate derivative metabolic process                                                      | GO:1901135 | Metabolism | Bioenergetics | P | 746  | 84  | 35.43 | 2.37  | 6.89E-12 | 9.37E-10 |
| 7 | 1246 | F2-3 vs. S2-3 | F2-3 up | + | carbohydrate metabolic process                                                                 | GO:0005975 | Metabolism | Bioenergetics | P | 950  | 128 | 45.12 | 2.84  | 1.24E-23 | 6.18E-21 |
| 7 | 1247 | F2-3 vs. S2-3 | F2-3 up | + | carbohydrate phosphatase activity                                                              | GO:0019203 | Metabolism | Bioenergetics | F | 29   | 7   | 1.38  | 5.08  | 1.02E-03 | 2.82E-02 |
| 7 | 1248 | F2-3 vs. S2-3 | F2-3 up | + | cellular carbohydrate biosynthetic process                                                     | GO:0034637 | Metabolism | Bioenergetics | P | 213  | 34  | 10.12 | 3.36  | 8.53E-09 | 6.99E-07 |
| 7 | 1249 | F2-3 vs. S2-3 | F2-3 up | + | cellular carbohydrate catabolic process                                                        | GO:0044275 | Metabolism | Bioenergetics | P | 46   | 10  | 2.18  | 4.58  | 1.88E-04 | 4.66E-03 |
| 7 | 1250 | F2-3 vs. S2-3 | F2-3 up | + | cellular carbohydrate metabolic process                                                        | GO:0044262 | Metabolism | Bioenergetics | P | 384  | 58  | 18.24 | 3.18  | 4.03E-13 | 6.51E-11 |
| 7 | 1251 | F2-3 vs. S2-3 | F2-3 up | + | cellular polysaccharide biosynthetic process                                                   | GO:0033692 | Metabolism | Bioenergetics | P | 177  | 25  | 8.41  | 2.97  | 5.47E-06 | 2.15E-04 |
| 7 | 1252 | F2-3 vs. S2-3 | F2-3 up | + | cellular polysaccharide metabolic process                                                      | GO:0044264 | Metabolism | Bioenergetics | P | 270  | 37  | 12.82 | 2.89  | 6.84E-08 | 4.30E-06 |
| 7 | 1253 | F2-3 vs. S2-3 | F2-3 up | + | cellular respiration                                                                           | GO:0045333 | Metabolism | Bioenergetics | P | 139  | 24  | 6.6   | 3.64  | 3.67E-07 | 1.89E-05 |
| 7 | 1254 | F2-3 vs. S2-3 | F2-3 up | + | disaccharide biosynthetic process                                                              | GO:0046351 | Metabolism | Bioenergetics | P | 31   | 8   | 1.47  | 5.43  | 3.06E-04 | 7.26E-03 |
| 7 | 1255 | F2-3 vs. S2-3 | F2-3 up | + | disaccharide metabolic process                                                                 | GO:0005984 | Metabolism | Bioenergetics | P | 70   | 12  | 3.32  | 3.61  | 3.15E-04 | 7.42E-03 |
| 7 | 1256 | F2-3 vs. S2-3 | F2-3 up | + | electron transfer activity                                                                     | GO:0009055 | Metabolism | Bioenergetics | F | 171  | 20  | 8.12  | 2.46  | 5.88E-04 | 1.77E-02 |
| 7 | 1257 | F2-3 vs. S2-3 | F2-3 up | + | electron transport chain                                                                       | GO:0022900 | Metabolism | Bioenergetics | P | 114  | 18  | 5.41  | 3.32  | 2.98E-05 | 9.57E-04 |
| 7 | 1258 | F2-3 vs. S2-3 | F2-3 up | + | energy derivation by oxidation of organic compounds                                            | GO:0015980 | Metabolism | Bioenergetics | P | 154  | 26  | 7.31  | 3.56  | 1.79E-07 | 9.82E-06 |
| 7 | 1259 | F2-3 vs. S2-3 | F2-3 up | + | fatty acid biosynthetic process                                                                | GO:0006633 | Metabolism | Bioenergetics | P | 134  | 19  | 6.36  | 2.99  | 6.72E-05 | 1.94E-03 |
| 7 | 1260 | F2-3 vs. S2-3 | F2-3 up | + | fatty acid derivative biosynthetic process                                                     | GO:1901570 | Metabolism | Bioenergetics | P | 30   | 7   | 1.42  | 4.91  | 1.21E-03 | 2.30E-02 |
| 7 | 1261 | F2-3 vs. S2-3 | F2-3 up | + | fatty acid derivative metabolic process                                                        | GO:1901568 | Metabolism | Bioenergetics | P | 43   | 10  | 2.04  | 4.9   | 1.16E-04 | 3.04E-03 |
| 7 | 1262 | F2-3 vs. S2-3 | F2-3 up | + | fatty acid metabolic process                                                                   | GO:0006631 | Metabolism | Bioenergetics | P | 221  | 33  | 10.5  | 3.14  | 5.82E-08 | 3.74E-06 |
| 7 | 1263 | F2-3 vs. S2-3 | F2-3 up | + | generation of precursor metabolites and energy                                                 | GO:0006091 | Metabolism | Bioenergetics | P | 378  | 77  | 17.95 | 4.29  | 1.05E-23 | 5.68E-21 |
| 7 | 1264 | F2-3 vs. S2-3 | F2-3 up | + | gluconeogenesis                                                                                | GO:0006094 | Metabolism | Bioenergetics | P | 23   | 8   | 1.09  | 7.32  | 5.42E-05 | 1.60E-03 |
| 7 | 1265 | F2-3 vs. S2-3 | F2-3 up | + | glucose 6-phosphate metabolic process                                                          | GO:0051156 | Metabolism | Bioenergetics | P | 42   | 11  | 1.99  | 5.51  | 2.10E-05 | 7.06E-04 |
| 7 | 1266 | F2-3 vs. S2-3 | F2-3 up | + | glucose metabolic process                                                                      | GO:0006006 | Metabolism | Bioenergetics | P | 42   | 11  | 1.99  | 5.51  | 2.10E-05 | 7.10E-04 |
| 7 | 1267 | F2-3 vs. S2-3 | F2-3 up | + | glyceraldehyde-3-phosphate dehydrogenase (NAD+) (non-phosphorylating) activity                 | GO:0043878 | Metabolism | Bioenergetics | F | 8    | 5   | 0.38  | 13.16 | 1.80E-04 | 6.44E-03 |
| 7 | 1268 | F2-3 vs. S2-3 | F2-3 up | + | hexose biosynthetic process                                                                    | GO:0019319 | Metabolism | Bioenergetics | P | 26   | 9   | 1.23  | 7.29  | 1.91E-05 | 6.63E-04 |
| 7 | 1269 | F2-3 vs. S2-3 | F2-3 up | + | hexose metabolic process                                                                       | GO:0019318 | Metabolism | Bioenergetics | P | 88   | 18  | 4.18  | 4.31  | 1.27E-06 | 5.81E-05 |
| 7 | 1270 | F2-3 vs. S2-3 | F2-3 up | + | isocitrate metabolic process                                                                   | GO:0006102 | Metabolism | Bioenergetics | P | 12   | 6   | 0.57  | 10.53 | 9.95E-05 | 2.72E-03 |
| 7 | 1271 | F2-3 vs. S2-3 | F2-3 up | + | monosaccharide biosynthetic process                                                            | GO:0046364 | Metabolism | Bioenergetics | P | 48   | 12  | 2.28  | 5.26  | 1.33E-05 | 4.86E-04 |
| 7 | 1272 | F2-3 vs. S2-3 | F2-3 up | + | NAD binding                                                                                    | GO:0051287 | Metabolism | Bioenergetics | F | 77   | 18  | 3.66  | 4.92  | 2.35E-07 | 1.89E-05 |
| 7 | 1273 | F2-3 vs. S2-3 | F2-3 up | + | NADP binding                                                                                   | GO:0050661 | Metabolism | Bioenergetics | F | 68   | 12  | 3.23  | 3.72  | 2.49E-04 | 8.25E-03 |
| 7 | 1274 | F2-3 vs. S2-3 | F2-3 up | + | NADP metabolic process                                                                         | GO:0006739 | Metabolism | Bioenergetics | P | 44   | 13  | 2.09  | 6.22  | 1.22E-06 | 5.63E-05 |
| 7 | 1275 | F2-3 vs. S2-3 | F2-3 up | + | NADPH regeneration                                                                             | GO:0006740 | Metabolism | Bioenergetics | P | 35   | 11  | 1.66  | 6.62  | 4.92E-06 | 2.00E-04 |
| 7 | 1276 | F2-3 vs. S2-3 | F2-3 up | + | oligosaccharide biosynthetic process                                                           | GO:0009312 | Metabolism | Bioenergetics | P | 37   | 8   | 1.76  | 4.55  | 8.43E-04 | 1.73E-02 |
| 7 | 1277 | F2-3 vs. S2-3 | F2-3 up | + | oligosaccharide metabolic process                                                              | GO:0009311 | Metabolism | Bioenergetics | P | 80   | 12  | 3.8   | 3.16  | 9.12E-04 | 1.82E-02 |
| 7 | 1278 | F2-3 vs. S2-3 | F2-3 up | + | oxidoreductase activity                                                                        | GO:0016491 | Metabolism | Bioenergetics | F | 1458 | 181 | 69.24 | 2.61  | 2.81E-29 | 4.52E-26 |
| 7 | 1279 | F2-3 vs. S2-3 | F2-3 up | + | oxidoreductase activity, acting on CH-OH group of donors                                       | GO:0016614 | Metabolism | Bioenergetics | F | 201  | 39  | 9.55  | 4.09  | 4.28E-12 | 1.15E-09 |
| 7 | 1280 | F2-3 vs. S2-3 | F2-3 up | + | oxidoreductase activity, acting on NAD(P)H                                                     | GO:0016651 | Metabolism | Bioenergetics | F | 121  | 23  | 5.75  | 4     | 1.43E-07 | 1.31E-05 |
| 7 | 1281 | F2-3 vs. S2-3 | F2-3 up | + | oxidoreductase activity, acting on paired donors, with incorporation or reduction of molecular | GO:0016705 | Metabolism | Bioenergetics | F | 392  | 37  | 18.62 | 1.99  | 2.31E-04 | 7.82E-03 |

|   |      |               |         |   |                                                                                         |            |             |               |   |      |     |        |       |          |          |
|---|------|---------------|---------|---|-----------------------------------------------------------------------------------------|------------|-------------|---------------|---|------|-----|--------|-------|----------|----------|
| 7 | 1282 | F2-3 vs. S2-3 | F2-3 up | + | oxidoreductase activity, acting on single donors with incorporation of molecular oxygen | GO:0016701 | Metabolism  | Bioenergetics | F | 38   | 9   | 1.8    | 4.99  | 2.26E-04 | 7.89E-03 |
| 7 | 1283 | F2-3 vs. S2-3 | F2-3 up | + | oxidoreductase activity, acting on the aldehyde or oxo group of donors                  | GO:0016903 | Metabolism  | Bioenergetics | F | 62   | 15  | 2.94   | 5.09  | 1.62E-06 | 1.06E-04 |
| 7 | 1284 | F2-3 vs. S2-3 | F2-3 up | + | oxidoreductase activity, acting on the aldehyde or oxo group of donors, NAD or NADP as  | GO:0016620 | Metabolism  | Bioenergetics | F | 43   | 13  | 2.04   | 6.37  | 9.85E-07 | 6.88E-05 |
| 7 | 1285 | F2-3 vs. S2-3 | F2-3 up | + | oxidoreductase activity, acting on the CH-OH group of donors, NAD or NADP as acceptor   | GO:0016616 | Metabolism  | Bioenergetics | F | 167  | 35  | 7.93   | 4.41  | 8.26E-12 | 1.90E-09 |
| 7 | 1286 | F2-3 vs. S2-3 | F2-3 up | + | pentose-phosphate shunt                                                                 | GO:0006098 | Metabolism  | Bioenergetics | P | 33   | 11  | 1.57   | 7.02  | 3.07E-06 | 1.29E-04 |
| 7 | 1287 | F2-3 vs. S2-3 | F2-3 up | + | pentose-phosphate shunt, non-oxidative branch                                           | GO:0009052 | Metabolism  | Bioenergetics | P | 8    | 4   | 0.38   | 10.53 | 1.55E-03 | 2.87E-02 |
| 7 | 1288 | F2-3 vs. S2-3 | F2-3 up | + | photorespiration                                                                        | GO:0009853 | Metabolism  | Bioenergetics | P | 42   | 9   | 1.99   | 4.51  | 4.28E-04 | 9.85E-03 |
| 7 | 1289 | F2-3 vs. S2-3 | F2-3 up | + | polysaccharide biosynthetic process                                                     | GO:0000271 | Metabolism  | Bioenergetics | P | 213  | 28  | 10.12  | 2.77  | 5.30E-06 | 2.10E-04 |
| 7 | 1290 | F2-3 vs. S2-3 | F2-3 up | + | polysaccharide metabolic process                                                        | GO:0005976 | Metabolism  | Bioenergetics | P | 419  | 63  | 19.9   | 3.17  | 4.65E-14 | 9.27E-12 |
| 7 | 1291 | F2-3 vs. S2-3 | F2-3 up | + | primary metabolic process                                                               | GO:0044238 | Metabolism  | Bioenergetics | P | 7219 | 453 | 342.83 | 1.32  | 5.43E-11 | 6.76E-09 |
| 7 | 1292 | F2-3 vs. S2-3 | F2-3 up | + | proton transmembrane transport                                                          | GO:1902600 | Metabolism  | Bioenergetics | P | 95   | 22  | 4.51   | 4.88  | 1.28E-08 | 9.96E-07 |
| 7 | 1293 | F2-3 vs. S2-3 | F2-3 up | + | proton-exporting ATPase activity, phosphorylative mechanism                             | GO:0008553 | Metabolism  | Bioenergetics | F | 20   | 7   | 0.95   | 7.37  | 1.55E-04 | 5.71E-03 |
| 7 | 1294 | F2-3 vs. S2-3 | F2-3 up | + | proton-transporting ATPase activity, rotational mechanism                               | GO:0046961 | Metabolism  | Bioenergetics | F | 25   | 8   | 1.19   | 6.74  | 8.79E-05 | 3.58E-03 |
| 7 | 1295 | F2-3 vs. S2-3 | F2-3 up | + | proton-transporting two-sector ATPase complex                                           | GO:0016469 | Metabolism  | Bioenergetics | C | 65   | 12  | 3.09   | 3.89  | 1.72E-04 | 2.80E-03 |
| 7 | 1296 | F2-3 vs. S2-3 | F2-3 up | + | proton-transporting V-type ATPase complex                                               | GO:0033176 | Metabolism  | Bioenergetics | C | 23   | 7   | 1.09   | 6.41  | 3.15E-04 | 5.04E-03 |
| 7 | 1297 | F2-3 vs. S2-3 | F2-3 up | + | pyrophosphate hydrolysis-driven proton transmembrane transporter activity               | GO:0009678 | Metabolism  | Bioenergetics | F | 44   | 15  | 2.09   | 7.18  | 3.95E-08 | 4.37E-06 |
| 7 | 1298 | F2-3 vs. S2-3 | F2-3 up | + | pyruvate family amino acid metabolic process                                            | GO:0009078 | Metabolism  | Bioenergetics | P | 4    | 3   | 0.19   | 15.79 | 2.84E-03 | 4.71E-02 |
| 7 | 1299 | F2-3 vs. S2-3 | F2-3 up | + | pyruvate metabolic process                                                              | GO:0006090 | Metabolism  | Bioenergetics | P | 79   | 12  | 3.75   | 3.2   | 8.27E-04 | 1.72E-02 |
| 7 | 1300 | F2-3 vs. S2-3 | F2-3 up | + | reductive pentose-phosphate cycle                                                       | GO:0019253 | Metabolism  | Bioenergetics | P | 14   | 9   | 0.66   | 13.54 | 3.61E-07 | 1.88E-05 |
| 7 | 1301 | F2-3 vs. S2-3 | F2-3 up | + | sucrose biosynthetic process                                                            | GO:0005986 | Metabolism  | Bioenergetics | P | 14   | 6   | 0.66   | 9.02  | 1.92E-04 | 4.75E-03 |
| 7 | 1302 | F2-3 vs. S2-3 | F2-3 up | + | sucrose metabolic process                                                               | GO:0005985 | Metabolism  | Bioenergetics | P | 46   | 9   | 2.18   | 4.12  | 7.61E-04 | 1.59E-02 |
| 7 | 1303 | F2-3 vs. S2-3 | F2-3 up | + | tricarboxylic acid cycle                                                                | GO:0006099 | Metabolism  | Bioenergetics | P | 46   | 16  | 2.18   | 7.32  | 1.11E-08 | 8.81E-07 |
| 7 | 1304 | F2-3 vs. S2-3 | F2-3 up | + | tricarboxylic acid metabolic process                                                    | GO:0072350 | Metabolism  | Bioenergetics | P | 21   | 7   | 1      | 7.02  | 1.98E-04 | 4.82E-03 |
| 7 | 1305 | F2-3 vs. S2-3 | F2-3 up | + | alanine catabolic process                                                               | GO:0006524 | Metabolism  | Catabolism    | P | 4    | 3   | 0.19   | 15.79 | 2.84E-03 | 4.75E-02 |
| 7 | 1306 | F2-3 vs. S2-3 | F2-3 up | + | alpha-amino acid catabolic process                                                      | GO:1901606 | Metabolism  | Catabolism    | P | 88   | 24  | 4.18   | 5.74  | 1.72E-10 | 1.83E-08 |
| 7 | 1307 | F2-3 vs. S2-3 | F2-3 up | + | aminopeptidase activity                                                                 | GO:0004177 | Metabolism  | Catabolism    | F | 23   | 6   | 1.09   | 5.49  | 1.66E-03 | 4.45E-02 |
| 7 | 1308 | F2-3 vs. S2-3 | F2-3 up | + | aromatic amino acid family catabolic process                                            | GO:0009074 | Metabolism  | Catabolism    | P | 21   | 7   | 1      | 7.02  | 1.98E-04 | 4.84E-03 |
| 7 | 1309 | F2-3 vs. S2-3 | F2-3 up | + | aromatic compound catabolic process                                                     | GO:0019439 | Metabolism  | Catabolism    | P | 199  | 21  | 9.45   | 2.22  | 1.51E-03 | 2.81E-02 |
| 7 | 1310 | F2-3 vs. S2-3 | F2-3 up | + | carboxylic acid catabolic process                                                       | GO:0046395 | Metabolism  | Catabolism    | P | 162  | 33  | 7.69   | 4.29  | 6.22E-11 | 7.44E-09 |
| 7 | 1311 | F2-3 vs. S2-3 | F2-3 up | + | catabolic process                                                                       | GO:0009056 | Metabolism  | Catabolism    | P | 1469 | 150 | 69.76  | 2.15  | 4.65E-17 | 1.21E-14 |
| 7 | 1312 | F2-3 vs. S2-3 | F2-3 up | + | cellular amino acid catabolic process                                                   | GO:0009063 | Metabolism  | Catabolism    | P | 97   | 24  | 4.61   | 5.21  | 9.17E-10 | 8.43E-08 |
| 7 | 1313 | F2-3 vs. S2-3 | F2-3 up | + | cellular catabolic process                                                              | GO:0044248 | Metabolism  | Catabolism    | P | 1223 | 113 | 58.08  | 1.95  | 1.51E-10 | 1.70E-08 |
| 7 | 1314 | F2-3 vs. S2-3 | F2-3 up | + | cysteine-type endopeptidase activity                                                    | GO:0004197 | Metabolism  | Catabolism    | F | 72   | 16  | 3.42   | 4.68  | 1.93E-06 | 1.17E-04 |
| 7 | 1315 | F2-3 vs. S2-3 | F2-3 up | + | endopeptidase activity                                                                  | GO:0004175 | Metabolism  | Catabolism    | F | 337  | 39  | 16     | 2.44  | 1.96E-06 | 1.17E-04 |
| 7 | 1316 | F2-3 vs. S2-3 | F2-3 up | + | glycine catabolic process                                                               | GO:0006546 | Metabolism  | Catabolism    | P | 8    | 5   | 0.38   | 13.16 | 1.80E-04 | 4.49E-03 |
| 7 | 1317 | F2-3 vs. S2-3 | F2-3 up | + | L-alanine catabolic process                                                             | GO:0042853 | Metabolism  | Catabolism    | P | 4    | 3   | 0.19   | 15.79 | 2.84E-03 | 4.79E-02 |
| 7 | 1318 | F2-3 vs. S2-3 | F2-3 up | + | leaf senescence                                                                         | GO:0010150 | Metabolism  | Catabolism    | P | 106  | 17  | 5.03   | 3.38  | 4.12E-05 | 1.26E-03 |
| 7 | 1319 | F2-3 vs. S2-3 | F2-3 up | + | lysosome                                                                                | GO:0005764 | Metabolism  | Catabolism    | C | 46   | 13  | 2.18   | 5.95  | 1.86E-06 | 4.96E-05 |
| 7 | 1320 | F2-3 vs. S2-3 | F2-3 up | + | macromolecule catabolic process                                                         | GO:0009057 | Metabolism  | Catabolism    | P | 889  | 71  | 42.22  | 1.68  | 5.21E-05 | 1.56E-03 |
| 7 | 1321 | F2-3 vs. S2-3 | F2-3 up | + | monocarboxylic acid catabolic process                                                   | GO:0072329 | Metabolism  | Catabolism    | P | 62   | 11  | 2.94   | 3.74  | 4.29E-04 | 9.78E-03 |
| 7 | 1322 | F2-3 vs. S2-3 | F2-3 up | + | organic acid catabolic process                                                          | GO:0016054 | Metabolism  | Catabolism    | P | 162  | 33  | 7.69   | 4.29  | 6.22E-11 | 7.59E-09 |
| 7 | 1323 | F2-3 vs. S2-3 | F2-3 up | + | organic cyclic compound catabolic process                                               | GO:1901361 | Metabolism  | Catabolism    | P | 210  | 22  | 9.97   | 2.21  | 1.17E-03 | 2.24E-02 |
| 7 | 1324 | F2-3 vs. S2-3 | F2-3 up | + | organic substance catabolic process                                                     | GO:1901575 | Metabolism  | Catabolism    | P | 1345 | 138 | 63.87  | 2.16  | 6.19E-16 | 1.42E-13 |
| 7 | 1325 | F2-3 vs. S2-3 | F2-3 up | + | organonitrogen compound catabolic process                                               | GO:1901565 | Metabolism  | Catabolism    | P | 836  | 71  | 39.7   | 1.79  | 9.75E-06 | 3.67E-04 |
| 7 | 1326 | F2-3 vs. S2-3 | F2-3 up | + | pectin catabolic process                                                                | GO:0045490 | Metabolism  | Catabolism    | P | 99   | 21  | 4.7    | 4.47  | 1.00E-07 | 6.10E-06 |
| 7 | 1327 | F2-3 vs. S2-3 | F2-3 up | + | peptidase activity                                                                      | GO:0008233 | Metabolism  | Catabolism    | F | 504  | 51  | 23.94  | 2.13  | 2.31E-06 | 1.33E-04 |
| 7 | 1328 | F2-3 vs. S2-3 | F2-3 up | + | peroxisome                                                                              | GO:0005777 | Metabolism  | Catabolism    | C | 320  | 37  | 15.2   | 2.43  | 3.88E-06 | 9.40E-05 |
| 7 | 1329 | F2-3 vs. S2-3 | F2-3 up | + | plant organ senescence                                                                  | GO:0090693 | Metabolism  | Catabolism    | P | 112  | 17  | 5.32   | 3.2   | 7.59E-05 | 2.11E-03 |
| 7 | 1330 | F2-3 vs. S2-3 | F2-3 up | + | polysaccharide catabolic process                                                        | GO:0000272 | Metabolism  | Catabolism    | P | 144  | 28  | 6.84   | 4.09  | 4.22E-09 | 3.66E-07 |
| 7 | 1331 | F2-3 vs. S2-3 | F2-3 up | + | pyruvate family amino acid catabolic process                                            | GO:0009080 | Metabolism  | Catabolism    | P | 4    | 3   | 0.19   | 15.79 | 2.84E-03 | 4.72E-02 |
| 7 | 1332 | F2-3 vs. S2-3 | F2-3 up | + | serine family amino acid catabolic process                                              | GO:0009071 | Metabolism  | Catabolism    | P | 17   | 6   | 0.81   | 7.43  | 4.45E-04 | 1.01E-02 |
| 7 | 1333 | F2-3 vs. S2-3 | F2-3 up | + | small molecule catabolic process                                                        | GO:0044282 | Metabolism  | Catabolism    | P | 239  | 44  | 11.35  | 3.88  | 8.82E-13 | 1.29E-10 |
| 7 | 1334 | F2-3 vs. S2-3 | F2-3 up | - | chromosome                                                                              | GO:0005694 | Development | Cell division | C | 545  | 12  | 25.88  | 0.46  | 3.85E-03 | 4.95E-02 |
| 7 | 1335 | F2-3 vs. S2-3 | F2-3 up | - | DNA recombination                                                                       | GO:0006310 | Development | Cell division | P | 155  | 0   | 7.36   | <     | 1.43E-03 | 2.68E-02 |
| 7 | 1336 | F2-3 vs. S2-3 | F2-3 up | - | DNA repair                                                                              | GO:0006281 | Development | Cell division | P | 315  | 2   | 14.96  | 0.13  | 1.04E-04 | 2.78E-03 |



|   |      |               |         |   |                                                        |            |             |               |   |       |      |         |       |          |          |
|---|------|---------------|---------|---|--------------------------------------------------------|------------|-------------|---------------|---|-------|------|---------|-------|----------|----------|
| 7 | 1337 | F2-3 vs. S2-3 | F2-3 up | - | nucleic acid metabolic process                         | GO:0090304 | Development | Cell division | P | 1705  | 35   | 80.97   | 0.43  | 1.25E-08 | 9.83E-07 |
| 7 | 1338 | F2-3 vs. S2-3 | F2-3 up | - | RNA metabolic process                                  | GO:0016070 | Development | Cell division | P | 1294  | 33   | 61.45   | 0.54  | 1.09E-04 | 2.89E-03 |
| 7 | 1339 | F2-3 vs. S2-3 | F2-3 up | + | gametophyte development                                | GO:0048229 | Development | Cell division | P | 461   | 39   | 21.89   | 1.78  | 1.04E-03 | 2.05E-02 |
| 7 | 1340 | F2-3 vs. S2-3 | F2-3 up | + | nucleobase-containing small molecule metabolic process | GO:0055086 | Development | Cell division | P | 392   | 46   | 18.62   | 2.47  | 1.53E-07 | 8.55E-06 |
| 7 | 1341 | F2-3 vs. S2-3 | F2-3 up | + | nucleoside phosphate binding                           | GO:1901265 | Development | Cell division | F | 1112  | 95   | 52.81   | 1.8   | 1.88E-07 | 1.59E-05 |
| 7 | 1342 | F2-3 vs. S2-3 | F2-3 up | + | nucleoside-triphosphatase activity                     | GO:0017111 | Development | Cell division | F | 734   | 60   | 34.86   | 1.72  | 1.24E-04 | 4.76E-03 |
| 7 | 1343 | F2-3 vs. S2-3 | F2-3 up | + | nucleotide binding                                     | GO:0000166 | Development | Cell division | F | 1112  | 95   | 52.81   | 1.8   | 1.88E-07 | 1.64E-05 |
| 7 | 1344 | F2-3 vs. S2-3 | F2-3 up | + | nucleotide-sugar biosynthetic process                  | GO:0009226 | Development | Cell division | P | 42    | 13   | 1.99    | 6.52  | 7.89E-07 | 3.75E-05 |
| 7 | 1345 | F2-3 vs. S2-3 | F2-3 up | + | nucleotide-sugar metabolic process                     | GO:0009225 | Development | Cell division | P | 52    | 16   | 2.47    | 6.48  | 4.60E-08 | 3.12E-06 |
| 7 | 1346 | F2-3 vs. S2-3 | F2-3 up | + | pollen tube development                                | GO:0048868 | Development | Cell division | P | 192   | 24   | 9.12    | 2.63  | 5.02E-05 | 1.51E-03 |
| 7 | 1347 | F2-3 vs. S2-3 | F2-3 up | + | pollen tube growth                                     | GO:0009860 | Development | Cell division | P | 135   | 22   | 6.41    | 3.43  | 2.58E-06 | 1.10E-04 |
| 7 | 1348 | F2-3 vs. S2-3 | F2-3 up | + | pollination                                            | GO:0009856 | Development | Cell division | P | 287   | 30   | 13.63   | 2.2   | 1.77E-04 | 4.42E-03 |
| 7 | 1349 | F2-3 vs. S2-3 | F2-3 up | + | ribonucleotide metabolic process                       | GO:0009259 | Development | Cell division | P | 226   | 23   | 10.73   | 2.14  | 1.15E-03 | 2.20E-02 |
| 7 | 1350 | F2-3 vs. S2-3 | F2-3 up | + | ribose phosphate metabolic process                     | GO:0019693 | Development | Cell division | P | 235   | 23   | 11.16   | 2.06  | 2.18E-03 | 3.83E-02 |
| 7 | 1351 | F2-3 vs. S2-3 | F2-3 up | + | syncytium formation                                    | GO:0006949 | Development | Cell division | P | 16    | 5    | 0.76    | 6.58  | 2.11E-03 | 3.71E-02 |
| 7 | 1352 | F2-3 vs. S2-3 | F2-3 up | - | chromatin organization                                 | GO:0006325 | Development | Development   | P | 333   | 4    | 15.81   | 0.25  | 9.05E-04 | 1.81E-02 |
| 7 | 1353 | F2-3 vs. S2-3 | F2-3 up | - | chromosome organization                                | GO:0051276 | Development | Development   | P | 501   | 4    | 23.79   | 0.17  | 2.19E-06 | 9.65E-05 |
| 7 | 1354 | F2-3 vs. S2-3 | F2-3 up | - | intracellular organelle lumen                          | GO:0070013 | Development | Development   | C | 1386  | 40   | 65.82   | 0.61  | 8.35E-04 | 1.24E-02 |
| 7 | 1355 | F2-3 vs. S2-3 | F2-3 up | - | membrane-enclosed lumen                                | GO:0031974 | Development | Development   | C | 1386  | 40   | 65.82   | 0.61  | 8.35E-04 | 1.22E-02 |
| 7 | 1356 | F2-3 vs. S2-3 | F2-3 up | - | nuclear lumen                                          | GO:0031981 | Development | Development   | C | 1222  | 29   | 58.03   | 0.5   | 3.78E-05 | 6.55E-04 |
| 7 | 1357 | F2-3 vs. S2-3 | F2-3 up | - | nucleoplasm                                            | GO:0005654 | Development | Development   | C | 466   | 8    | 22.13   | 0.36  | 1.14E-03 | 1.63E-02 |
| 7 | 1358 | F2-3 vs. S2-3 | F2-3 up | - | nucleus                                                | GO:0005634 | Development | Development   | C | 10540 | 359  | 500.55  | 0.72  | 9.03E-16 | 4.09E-14 |
| 7 | 1359 | F2-3 vs. S2-3 | F2-3 up | - | organelle assembly                                     | GO:0070925 | Development | Development   | P | 193   | 1    | 9.17    | 0.11  | 2.61E-03 | 4.47E-02 |
| 7 | 1360 | F2-3 vs. S2-3 | F2-3 up | - | organelle lumen                                        | GO:0043233 | Development | Development   | C | 1386  | 40   | 65.82   | 0.61  | 8.35E-04 | 1.21E-02 |
| 7 | 1361 | F2-3 vs. S2-3 | F2-3 up | + | actin cytoskeleton                                     | GO:0015629 | Development | Development   | C | 63    | 10   | 2.99    | 3.34  | 1.64E-03 | 2.24E-02 |
| 7 | 1362 | F2-3 vs. S2-3 | F2-3 up | + | actin cytoskeleton organization                        | GO:0030036 | Development | Development   | P | 104   | 14   | 4.94    | 2.83  | 9.27E-04 | 1.85E-02 |
| 7 | 1363 | F2-3 vs. S2-3 | F2-3 up | + | actin filament                                         | GO:0005884 | Development | Development   | C | 10    | 5    | 0.47    | 10.53 | 3.90E-04 | 6.15E-03 |
| 7 | 1364 | F2-3 vs. S2-3 | F2-3 up | + | anatomical structure development                       | GO:0048856 | Development | Development   | P | 2842  | 189  | 134.97  | 1.4   | 5.68E-06 | 2.22E-04 |
| 7 | 1365 | F2-3 vs. S2-3 | F2-3 up | + | apoplast                                               | GO:0048046 | Development | Development   | C | 297   | 59   | 14.1    | 4.18  | 5.25E-18 | 2.60E-16 |
| 7 | 1366 | F2-3 vs. S2-3 | F2-3 up | + | bounding membrane of organelle                         | GO:0098588 | Development | Development   | C | 923   | 84   | 43.83   | 1.92  | 7.53E-08 | 2.37E-06 |
| 7 | 1367 | F2-3 vs. S2-3 | F2-3 up | + | cell development                                       | GO:0048468 | Development | Development   | P | 319   | 34   | 15.15   | 2.24  | 4.40E-05 | 1.34E-03 |
| 7 | 1368 | F2-3 vs. S2-3 | F2-3 up | + | cell growth                                            | GO:0016049 | Development | Development   | P | 386   | 46   | 18.33   | 2.51  | 1.20E-07 | 7.18E-06 |
| 7 | 1369 | F2-3 vs. S2-3 | F2-3 up | + | cell junction                                          | GO:0030054 | Development | Development   | C | 944   | 78   | 44.83   | 1.74  | 7.60E-06 | 1.58E-04 |
| 7 | 1370 | F2-3 vs. S2-3 | F2-3 up | + | cell morphogenesis                                     | GO:0000902 | Development | Development   | P | 369   | 40   | 17.52   | 2.28  | 5.85E-06 | 2.27E-04 |
| 7 | 1371 | F2-3 vs. S2-3 | F2-3 up | + | cell morphogenesis involved in differentiation         | GO:0000904 | Development | Development   | P | 229   | 26   | 10.88   | 2.39  | 1.13E-04 | 2.99E-03 |
| 7 | 1372 | F2-3 vs. S2-3 | F2-3 up | + | cell periphery                                         | GO:0071944 | Development | Development   | C | 4012  | 324  | 190.53  | 1.7   | 3.84E-21 | 2.00E-19 |
| 7 | 1373 | F2-3 vs. S2-3 | F2-3 up | + | cell projection                                        | GO:0042995 | Development | Development   | C | 115   | 17   | 5.46    | 3.11  | 1.01E-04 | 1.73E-03 |
| 7 | 1374 | F2-3 vs. S2-3 | F2-3 up | + | cell tip growth                                        | GO:0009932 | Development | Development   | P | 160   | 24   | 7.6     | 3.16  | 3.35E-06 | 1.38E-04 |
| 7 | 1375 | F2-3 vs. S2-3 | F2-3 up | + | cell wall                                              | GO:0005618 | Development | Development   | C | 565   | 63   | 26.83   | 2.35  | 4.53E-09 | 1.52E-07 |
| 7 | 1376 | F2-3 vs. S2-3 | F2-3 up | + | cell wall biogenesis                                   | GO:0042546 | Development | Development   | P | 238   | 26   | 11.3    | 2.3   | 2.48E-04 | 5.97E-03 |
| 7 | 1377 | F2-3 vs. S2-3 | F2-3 up | + | cell wall modification                                 | GO:0042545 | Development | Development   | P | 173   | 28   | 8.22    | 3.41  | 1.33E-07 | 7.81E-06 |
| 7 | 1378 | F2-3 vs. S2-3 | F2-3 up | + | cell wall organization                                 | GO:0071555 | Development | Development   | P | 274   | 40   | 13.01   | 3.07  | 4.20E-09 | 3.69E-07 |
| 7 | 1379 | F2-3 vs. S2-3 | F2-3 up | + | cell wall organization or biogenesis                   | GO:0071554 | Development | Development   | P | 507   | 63   | 24.08   | 2.62  | 7.74E-11 | 9.08E-09 |
| 7 | 1380 | F2-3 vs. S2-3 | F2-3 up | + | cell-cell junction                                     | GO:0005911 | Development | Development   | C | 944   | 78   | 44.83   | 1.74  | 7.60E-06 | 1.68E-04 |
| 7 | 1381 | F2-3 vs. S2-3 | F2-3 up | + | cellular anatomical entity                             | GO:0110165 | Development | Development   | C | 24430 | 1230 | 1160.19 | 1.06  | 3.80E-11 | 1.41E-09 |
| 7 | 1382 | F2-3 vs. S2-3 | F2-3 up | + | cellular component organization or biogenesis          | GO:0071840 | Development | Development   | P | 2813  | 168  | 133.59  | 1.26  | 2.89E-03 | 4.78E-02 |
| 7 | 1383 | F2-3 vs. S2-3 | F2-3 up | + | cellular process                                       | GO:0009987 | Development | Development   | P | 12008 | 804  | 570.27  | 1.41  | 6.02E-37 | 1.20E-33 |
| 7 | 1384 | F2-3 vs. S2-3 | F2-3 up | + | cytoplasm                                              | GO:0005737 | Development | Development   | C | 14837 | 951  | 704.62  | 1.35  | 7.91E-43 | 8.24E-40 |
| 7 | 1385 | F2-3 vs. S2-3 | F2-3 up | + | cytosol                                                | GO:0005829 | Development | Development   | C | 3241  | 310  | 153.92  | 2.01  | 1.84E-31 | 2.74E-29 |
| 7 | 1386 | F2-3 vs. S2-3 | F2-3 up | + | developmental cell growth                              | GO:0048588 | Development | Development   | P | 197   | 29   | 9.36    | 3.1   | 4.72E-07 | 2.35E-05 |
| 7 | 1387 | F2-3 vs. S2-3 | F2-3 up | + | developmental growth                                   | GO:0048589 | Development | Development   | P | 385   | 47   | 18.28   | 2.57  | 3.30E-08 | 2.35E-06 |
| 7 | 1388 | F2-3 vs. S2-3 | F2-3 up | + | developmental growth involved in                       | GO:0060560 | Development | Development   | P | 335   | 43   | 15.91   | 2.7   | 5.49E-08 | 3.61E-06 |
| 7 | 1389 | F2-3 vs. S2-3 | F2-3 up | + | developmental process                                  | GO:0032502 | Development | Development   | P | 2997  | 197  | 142.33  | 1.38  | 6.13E-06 | 2.35E-04 |
| 7 | 1390 | F2-3 vs. S2-3 | F2-3 up | + | endomembrane system                                    | GO:0012505 | Development | Development   | C | 2286  | 185  | 108.56  | 1.7   | 8.28E-12 | 3.19E-10 |
| 7 | 1391 | F2-3 vs. S2-3 | F2-3 up | + | envelope                                               | GO:0031975 | Development | Development   | C | 1025  | 131  | 48.68   | 2.69  | 3.42E-22 | 1.98E-20 |
| 7 | 1392 | F2-3 vs. S2-3 | F2-3 up | + | external encapsulating structure                       | GO:0030312 | Development | Development   | C | 567   | 63   | 26.93   | 2.34  | 4.94E-09 | 1.61E-07 |
| 7 | 1393 | F2-3 vs. S2-3 | F2-3 up | + | external encapsulating structure organization          | GO:0045229 | Development | Development   | P | 320   | 47   | 15.2    | 3.09  | 1.57E-10 | 1.74E-08 |
| 7 | 1394 | F2-3 vs. S2-3 | F2-3 up | + | extracellular region                                   | GO:0005576 | Development | Development   | C | 3128  | 228  | 148.55  | 1.53  | 2.92E-10 | 1.05E-08 |
| 7 | 1395 | F2-3 vs. S2-3 | F2-3 up | + | extracellular space                                    | GO:0005615 | Development | Development   | C | 130   | 22   | 6.17    | 3.56  | 1.49E-06 | 4.08E-05 |
| 7 | 1396 | F2-3 vs. S2-3 | F2-3 up | + | Golgi apparatus subcompartment                         | GO:0098791 | Development | Development   | C | 437   | 44   | 20.75   | 2.12  | 1.16E-05 | 2.19E-04 |
| 7 | 1397 | F2-3 vs. S2-3 | F2-3 up | + | Golgi cisterna                                         | GO:0031985 | Development | Development   | C | 185   | 19   | 8.79    | 2.16  | 3.26E-03 | 4.30E-02 |

|   |      |               |         |   |                                                 |            |             |             |   |       |      |         |       |          |          |
|---|------|---------------|---------|---|-------------------------------------------------|------------|-------------|-------------|---|-------|------|---------|-------|----------|----------|
| 7 | 1398 | F2-3 vs. S2-3 | F2-3 up | + | Golgi trans cisterna                            | GO:0000138 | Development | Development | C | 85    | 12   | 4.04    | 2.97  | 1.46E-03 | 2.02E-02 |
| 7 | 1399 | F2-3 vs. S2-3 | F2-3 up | + | growth                                          | GO:0040007 | Development | Development | P | 443   | 50   | 21.04   | 2.38  | 1.36E-07 | 7.92E-06 |
| 7 | 1400 | F2-3 vs. S2-3 | F2-3 up | + | integral component of plasma membrane           | GO:0005887 | Development | Development | C | 107   | 13   | 5.08    | 2.56  | 3.15E-03 | 4.20E-02 |
| 7 | 1401 | F2-3 vs. S2-3 | F2-3 up | + | intracellular anatomical structure              | GO:0005622 | Development | Development | C | 21464 | 1084 | 1019.34 | 1.06  | 1.32E-05 | 2.46E-04 |
| 7 | 1402 | F2-3 vs. S2-3 | F2-3 up | + | intracellular vesicle                           | GO:0097708 | Development | Development | C | 722   | 65   | 34.29   | 1.9   | 3.32E-06 | 8.43E-05 |
| 7 | 1403 | F2-3 vs. S2-3 | F2-3 up | + | lytic vacuole                                   | GO:0000323 | Development | Development | C | 52    | 15   | 2.47    | 6.07  | 2.43E-07 | 7.45E-06 |
| 7 | 1404 | F2-3 vs. S2-3 | F2-3 up | + | membrane                                        | GO:0016020 | Development | Development | C | 5493  | 448  | 260.87  | 1.72  | 5.90E-32 | 1.02E-29 |
| 7 | 1405 | F2-3 vs. S2-3 | F2-3 up | + | membrane protein complex                        | GO:0098796 | Development | Development | C | 597   | 51   | 28.35   | 1.8   | 1.67E-04 | 2.76E-03 |
| 7 | 1406 | F2-3 vs. S2-3 | F2-3 up | + | microbody                                       | GO:0042579 | Development | Development | C | 320   | 37   | 15.2    | 2.43  | 3.88E-06 | 9.62E-05 |
| 7 | 1407 | F2-3 vs. S2-3 | F2-3 up | + | multicellular organism development              | GO:0007275 | Development | Development | P | 2457  | 150  | 116.68  | 1.29  | 2.19E-03 | 3.84E-02 |
| 7 | 1408 | F2-3 vs. S2-3 | F2-3 up | + | multi-multicellular organism process            | GO:0044706 | Development | Development | P | 287   | 30   | 13.63   | 2.2   | 1.77E-04 | 4.44E-03 |
| 7 | 1409 | F2-3 vs. S2-3 | F2-3 up | + | organelle envelope                              | GO:0031967 | Development | Development | C | 1025  | 131  | 48.68   | 2.69  | 3.42E-22 | 1.87E-20 |
| 7 | 1410 | F2-3 vs. S2-3 | F2-3 up | + | organelle membrane                              | GO:0031090 | Development | Development | C | 1458  | 114  | 69.24   | 1.65  | 7.12E-07 | 2.06E-05 |
| 7 | 1411 | F2-3 vs. S2-3 | F2-3 up | + | organelle subcompartment                        | GO:0031984 | Development | Development | C | 1156  | 143  | 54.9    | 2.6   | 4.36E-23 | 2.67E-21 |
| 7 | 1412 | F2-3 vs. S2-3 | F2-3 up | + | plant-type cell wall loosening                  | GO:0009828 | Development | Development | P | 37    | 8    | 1.76    | 4.55  | 8.43E-04 | 1.73E-02 |
| 7 | 1413 | F2-3 vs. S2-3 | F2-3 up | + | plant-type cell wall modification               | GO:0009827 | Development | Development | P | 64    | 10   | 3.04    | 3.29  | 1.82E-03 | 3.26E-02 |
| 7 | 1414 | F2-3 vs. S2-3 | F2-3 up | + | plant-type cell wall organization               | GO:0009664 | Development | Development | P | 150   | 20   | 7.12    | 2.81  | 9.41E-05 | 2.59E-03 |
| 7 | 1415 | F2-3 vs. S2-3 | F2-3 up | + | plant-type cell wall organization or biogenesis | GO:0071669 | Development | Development | P | 265   | 31   | 12.58   | 2.46  | 1.53E-05 | 5.53E-04 |
| 7 | 1416 | F2-3 vs. S2-3 | F2-3 up | + | plant-type vacuole                              | GO:0000325 | Development | Development | C | 173   | 23   | 8.22    | 2.8   | 3.03E-05 | 5.44E-04 |
| 7 | 1417 | F2-3 vs. S2-3 | F2-3 up | + | plasma membrane                                 | GO:0005886 | Development | Development | C | 3534  | 273  | 167.83  | 1.63  | 3.32E-15 | 1.44E-13 |
| 7 | 1418 | F2-3 vs. S2-3 | F2-3 up | + | plasma membrane bounded cell projection         | GO:0120025 | Development | Development | C | 101   | 17   | 4.8     | 3.54  | 2.39E-05 | 4.37E-04 |
| 7 | 1419 | F2-3 vs. S2-3 | F2-3 up | + | pollen development                              | GO:0009555 | Development | Development | P | 346   | 34   | 16.43   | 2.07  | 1.63E-04 | 4.19E-03 |
| 7 | 1420 | F2-3 vs. S2-3 | F2-3 up | + | pollen tube                                     | GO:0090406 | Development | Development | C | 83    | 16   | 3.94    | 4.06  | 9.43E-06 | 1.85E-04 |
| 7 | 1421 | F2-3 vs. S2-3 | F2-3 up | + | stromule                                        | GO:0010319 | Development | Development | C | 36    | 21   | 1.71    | 12.28 | 2.33E-14 | 9.70E-13 |
| 7 | 1422 | F2-3 vs. S2-3 | F2-3 up | + | structural constituent of cytoskeleton          | GO:0005200 | Development | Development | F | 28    | 8    | 1.33    | 6.02  | 1.70E-04 | 6.13E-03 |
| 7 | 1423 | F2-3 vs. S2-3 | F2-3 up | + | symplast                                        | GO:0055044 | Development | Development | C | 944   | 78   | 44.83   | 1.74  | 7.60E-06 | 1.65E-04 |
| 7 | 1424 | F2-3 vs. S2-3 | F2-3 up | + | unidimensional cell growth                      | GO:0009826 | Development | Development | P | 288   | 37   | 13.68   | 2.71  | 2.92E-07 | 1.56E-05 |
| 7 | 1425 | F2-3 vs. S2-3 | F2-3 up | + | vacuolar membrane                               | GO:0005774 | Development | Development | C | 570   | 58   | 27.07   | 2.14  | 3.07E-07 | 9.13E-06 |
| 7 | 1426 | F2-3 vs. S2-3 | F2-3 up | + | vacuole                                         | GO:0005773 | Development | Development | C | 1083  | 124  | 51.43   | 2.41  | 1.17E-17 | 5.53E-16 |
| 7 | 1427 | F2-3 vs. S2-3 | F2-3 up | - | DNA binding                                     | GO:0003677 | Metabolism  | Metabolism  | F | 1606  | 37   | 76.27   | 0.49  | 8.80E-07 | 6.28E-05 |
| 7 | 1428 | F2-3 vs. S2-3 | F2-3 up | - | DNA metabolic process                           | GO:0006259 | Metabolism  | Metabolism  | P | 448   | 3    | 21.28   | 0.14  | 3.10E-06 | 1.29E-04 |
| 7 | 1429 | F2-3 vs. S2-3 | F2-3 up | - | transferase complex                             | GO:1990234 | Metabolism  | Metabolism  | C | 698   | 17   | 33.15   | 0.51  | 3.41E-03 | 4.44E-02 |
| 7 | 1430 | F2-3 vs. S2-3 | F2-3 up | + | actin filament bundle assembly                  | GO:0051017 | Metabolism  | Metabolism  | P | 20    | 6    | 0.95    | 6.32  | 9.04E-04 | 1.82E-02 |
| 7 | 1431 | F2-3 vs. S2-3 | F2-3 up | + | actin filament bundle organization              | GO:0061572 | Metabolism  | Metabolism  | P | 20    | 6    | 0.95    | 6.32  | 9.04E-04 | 1.83E-02 |
| 7 | 1432 | F2-3 vs. S2-3 | F2-3 up | + | actin filament-based process                    | GO:0030029 | Metabolism  | Metabolism  | P | 113   | 14   | 5.37    | 2.61  | 1.89E-03 | 3.36E-02 |
| 7 | 1433 | F2-3 vs. S2-3 | F2-3 up | + | alanine metabolic process                       | GO:0006522 | Metabolism  | Metabolism  | P | 4     | 3    | 0.19    | 15.79 | 2.84E-03 | 4.74E-02 |
| 7 | 1434 | F2-3 vs. S2-3 | F2-3 up | + | alcohol metabolic process                       | GO:0006066 | Metabolism  | Metabolism  | P | 119   | 16   | 5.65    | 2.83  | 4.19E-04 | 9.66E-03 |
| 7 | 1435 | F2-3 vs. S2-3 | F2-3 up | + | alpha-amino acid biosynthetic process           | GO:1901607 | Metabolism  | Metabolism  | P | 181   | 24   | 8.6     | 2.79  | 2.14E-05 | 7.14E-04 |
| 7 | 1436 | F2-3 vs. S2-3 | F2-3 up | + | alpha-amino acid metabolic process              | GO:1901605 | Metabolism  | Metabolism  | P | 278   | 48   | 13.2    | 3.64  | 6.44E-13 | 9.88E-11 |
| 7 | 1437 | F2-3 vs. S2-3 | F2-3 up | + | amine biosynthetic process                      | GO:0009309 | Metabolism  | Metabolism  | P | 44    | 11   | 2.09    | 5.26  | 3.03E-05 | 9.70E-04 |
| 7 | 1438 | F2-3 vs. S2-3 | F2-3 up | + | amine metabolic process                         | GO:0009308 | Metabolism  | Metabolism  | P | 115   | 17   | 5.46    | 3.11  | 1.01E-04 | 2.74E-03 |
| 7 | 1439 | F2-3 vs. S2-3 | F2-3 up | + | anchoring junction                              | GO:0070161 | Metabolism  | Metabolism  | C | 944   | 78   | 44.83   | 1.74  | 7.60E-06 | 1.62E-04 |
| 7 | 1440 | F2-3 vs. S2-3 | F2-3 up | + | anion binding                                   | GO:0043168 | Metabolism  | Metabolism  | F | 1369  | 128  | 65.01   | 1.97  | 4.44E-12 | 1.10E-09 |
| 7 | 1441 | F2-3 vs. S2-3 | F2-3 up | + | aromatic amino acid family metabolic process    | GO:0009072 | Metabolism  | Metabolism  | P | 87    | 13   | 4.13    | 3.15  | 5.86E-04 | 1.28E-02 |
| 7 | 1442 | F2-3 vs. S2-3 | F2-3 up | + | aromatic compound biosynthetic process          | GO:0019438 | Metabolism  | Metabolism  | P | 808   | 67   | 38.37   | 1.75  | 3.17E-05 | 9.98E-04 |
| 7 | 1443 | F2-3 vs. S2-3 | F2-3 up | + | binding                                         | GO:0005488 | Metabolism  | Metabolism  | F | 9843  | 572  | 467.45  | 1.22  | 5.85E-09 | 7.83E-07 |
| 7 | 1444 | F2-3 vs. S2-3 | F2-3 up | + | biological_process                              | GO:0008150 | Metabolism  | Metabolism  | P | 21988 | 1119 | 1044.22 | 1.07  | 1.37E-07 | 7.85E-06 |
| 7 | 1445 | F2-3 vs. S2-3 | F2-3 up | + | biosynthetic process                            | GO:0009058 | Metabolism  | Metabolism  | P | 2811  | 258  | 133.5   | 1.93  | 2.21E-23 | 1.02E-20 |
| 7 | 1446 | F2-3 vs. S2-3 | F2-3 up | + | capsule organization                            | GO:0045230 | Metabolism  | Metabolism  | P | 6     | 5    | 0.28    | 17.55 | 6.98E-05 | 1.99E-03 |
| 7 | 1447 | F2-3 vs. S2-3 | F2-3 up | + | capsule polysaccharide biosynthetic process     | GO:0045227 | Metabolism  | Metabolism  | P | 6     | 5    | 0.28    | 17.55 | 6.98E-05 | 1.98E-03 |
| 7 | 1448 | F2-3 vs. S2-3 | F2-3 up | + | carbon utilization                              | GO:0015976 | Metabolism  | Metabolism  | P | 8     | 4    | 0.38    | 10.53 | 1.55E-03 | 2.88E-02 |
| 7 | 1449 | F2-3 vs. S2-3 | F2-3 up | + | carbon-carbon lyase activity                    | GO:0016830 | Metabolism  | Metabolism  | F | 111   | 23   | 5.27    | 4.36  | 3.63E-08 | 4.17E-06 |
| 7 | 1450 | F2-3 vs. S2-3 | F2-3 up | + | carboxylic acid biosynthetic process            | GO:0046394 | Metabolism  | Metabolism  | P | 468   | 62   | 22.23   | 2.79  | 9.88E-12 | 1.28E-09 |
| 7 | 1451 | F2-3 vs. S2-3 | F2-3 up | + | carboxylic acid metabolic process               | GO:0019752 | Metabolism  | Metabolism  | P | 912   | 132  | 43.31   | 3.05  | 6.13E-27 | 5.23E-24 |
| 7 | 1452 | F2-3 vs. S2-3 | F2-3 up | + | carboxylic ester hydrolase activity             | GO:0052689 | Metabolism  | Metabolism  | F | 229   | 25   | 10.88   | 2.3   | 3.42E-04 | 1.11E-02 |
| 7 | 1453 | F2-3 vs. S2-3 | F2-3 up | + | carboxy-lyase activity                          | GO:0016831 | Metabolism  | Metabolism  | F | 68    | 15   | 3.23    | 4.64  | 4.34E-06 | 2.32E-04 |
| 7 | 1454 | F2-3 vs. S2-3 | F2-3 up | + | catalytic activity                              | GO:0003824 | Metabolism  | Metabolism  | F | 8380  | 716  | 397.97  | 1.8   | 8.81E-71 | 2.83E-67 |
| 7 | 1455 | F2-3 vs. S2-3 | F2-3 up | + | cation binding                                  | GO:0043169 | Metabolism  | Metabolism  | F | 1637  | 157  | 77.74   | 2.02  | 1.51E-15 | 5.40E-13 |
| 7 | 1456 | F2-3 vs. S2-3 | F2-3 up | + | cellular aldehyde metabolic process             | GO:0006081 | Metabolism  | Metabolism  | P | 48    | 13   | 2.28    | 5.7   | 2.77E-06 | 1.18E-04 |
| 7 | 1457 | F2-3 vs. S2-3 | F2-3 up | + | cellular amine metabolic process                | GO:0044106 | Metabolism  | Metabolism  | P | 64    | 15   | 3.04    | 4.94  | 2.28E-06 | 9.87E-05 |
| 7 | 1458 | F2-3 vs. S2-3 | F2-3 up | + | cellular amino acid biosynthetic process        | GO:0008652 | Metabolism  | Metabolism  | P | 200   | 27   | 9.5     | 2.84  | 5.00E-06 | 2.02E-04 |
| 7 | 1459 | F2-3 vs. S2-3 | F2-3 up | + | cellular amino acid metabolic process           | GO:0006520 | Metabolism  | Metabolism  | P | 391   | 57   | 18.57   | 3.07  | 2.32E-12 | 3.23E-10 |

|   |      |               |         |   |                                                                                    |            |            |            |   |      |     |        |       |          |          |
|---|------|---------------|---------|---|------------------------------------------------------------------------------------|------------|------------|------------|---|------|-----|--------|-------|----------|----------|
| 7 | 1460 | F2-3 vs. S2-3 | F2-3 up | + | cellular biogenic amine biosynthetic process                                       | GO:0042401 | Metabolism | Metabolism | P | 44   | 11  | 2.09   | 5.26  | 3.03E-05 | 9.65E-04 |
| 7 | 1461 | F2-3 vs. S2-3 | F2-3 up | + | cellular biogenic amine metabolic process                                          | GO:0006576 | Metabolism | Metabolism | P | 64   | 15  | 3.04   | 4.94  | 2.28E-06 | 9.94E-05 |
| 7 | 1462 | F2-3 vs. S2-3 | F2-3 up | + | cellular biosynthetic process                                                      | GO:0044249 | Metabolism | Metabolism | P | 2583 | 216 | 122.67 | 1.76  | 3.54E-15 | 7.84E-13 |
| 7 | 1463 | F2-3 vs. S2-3 | F2-3 up | + | cellular glucan metabolic process                                                  | GO:0006073 | Metabolism | Metabolism | P | 195  | 25  | 9.26   | 2.7   | 2.42E-05 | 7.96E-04 |
| 7 | 1464 | F2-3 vs. S2-3 | F2-3 up | + | cellular lipid metabolic process                                                   | GO:0044255 | Metabolism | Metabolism | P | 689  | 68  | 32.72  | 2.08  | 1.08E-07 | 6.55E-06 |
| 7 | 1465 | F2-3 vs. S2-3 | F2-3 up | + | cellular metabolic process                                                         | GO:0044237 | Metabolism | Metabolism | P | 7649 | 542 | 363.25 | 1.49  | 4.28E-25 | 2.84E-22 |
| 7 | 1466 | F2-3 vs. S2-3 | F2-3 up | + | cellulose synthase (UDP-forming) activity                                          | GO:0016760 | Metabolism | Metabolism | F | 26   | 7   | 1.23   | 5.67  | 5.87E-04 | 1.78E-02 |
| 7 | 1467 | F2-3 vs. S2-3 | F2-3 up | + | cellulose synthase activity                                                        | GO:0016759 | Metabolism | Metabolism | F | 37   | 8   | 1.76   | 4.55  | 8.43E-04 | 2.46E-02 |
| 7 | 1468 | F2-3 vs. S2-3 | F2-3 up | + | copper ion binding                                                                 | GO:0005507 | Metabolism | Metabolism | F | 193  | 35  | 9.17   | 3.82  | 2.67E-10 | 4.29E-08 |
| 7 | 1469 | F2-3 vs. S2-3 | F2-3 up | + | cysteine-type peptidase activity                                                   | GO:0008234 | Metabolism | Metabolism | F | 101  | 16  | 4.8    | 3.34  | 7.82E-05 | 3.26E-03 |
| 7 | 1470 | F2-3 vs. S2-3 | F2-3 up | + | dicarboxylic acid metabolic process                                                | GO:0043648 | Metabolism | Metabolism | P | 89   | 16  | 4.23   | 3.79  | 2.02E-05 | 6.91E-04 |
| 7 | 1471 | F2-3 vs. S2-3 | F2-3 up | + | dioxygenase activity                                                               | GO:0051213 | Metabolism | Metabolism | F | 116  | 15  | 5.51   | 2.72  | 8.98E-04 | 2.55E-02 |
| 7 | 1472 | F2-3 vs. S2-3 | F2-3 up | + | establishment of localization                                                      | GO:0051234 | Metabolism | Metabolism | P | 2306 | 180 | 109.51 | 1.64  | 2.24E-10 | 2.27E-08 |
| 7 | 1473 | F2-3 vs. S2-3 | F2-3 up | + | extracellular polysaccharide biosynthetic                                          | GO:0045226 | Metabolism | Metabolism | P | 6    | 5   | 0.28   | 17.55 | 6.98E-05 | 1.97E-03 |
| 7 | 1474 | F2-3 vs. S2-3 | F2-3 up | + | extracellular polysaccharide metabolic process                                     | GO:0046379 | Metabolism | Metabolism | P | 6    | 5   | 0.28   | 17.55 | 6.98E-05 | 1.96E-03 |
| 7 | 1475 | F2-3 vs. S2-3 | F2-3 up | + | ferric iron binding                                                                | GO:0008199 | Metabolism | Metabolism | F | 11   | 5   | 0.52   | 9.57  | 5.46E-04 | 1.67E-02 |
| 7 | 1476 | F2-3 vs. S2-3 | F2-3 up | + | ferrous iron binding                                                               | GO:0008198 | Metabolism | Metabolism | F | 16   | 6   | 0.76   | 7.9   | 3.42E-04 | 1.10E-02 |
| 7 | 1477 | F2-3 vs. S2-3 | F2-3 up | + | galactose metabolic process                                                        | GO:0006012 | Metabolism | Metabolism | P | 26   | 6   | 1.23   | 4.86  | 2.82E-03 | 4.78E-02 |
| 7 | 1478 | F2-3 vs. S2-3 | F2-3 up | + | galacturonan metabolic process                                                     | GO:0010393 | Metabolism | Metabolism | P | 163  | 28  | 7.74   | 3.62  | 4.42E-08 | 3.04E-06 |
| 7 | 1479 | F2-3 vs. S2-3 | F2-3 up | + | glucan biosynthetic process                                                        | GO:0009250 | Metabolism | Metabolism | P | 118  | 16  | 5.6    | 2.86  | 3.85E-04 | 8.95E-03 |
| 7 | 1480 | F2-3 vs. S2-3 | F2-3 up | + | glucan metabolic process                                                           | GO:0044042 | Metabolism | Metabolism | P | 203  | 27  | 9.64   | 2.8   | 6.39E-06 | 2.42E-04 |
| 7 | 1481 | F2-3 vs. S2-3 | F2-3 up | + | glucosinolate biosynthetic process                                                 | GO:0019761 | Metabolism | Metabolism | P | 39   | 8   | 1.85   | 4.32  | 1.13E-03 | 2.20E-02 |
| 7 | 1482 | F2-3 vs. S2-3 | F2-3 up | + | glucosinolate metabolic process                                                    | GO:0019760 | Metabolism | Metabolism | P | 112  | 15  | 5.32   | 2.82  | 6.49E-04 | 1.41E-02 |
| 7 | 1483 | F2-3 vs. S2-3 | F2-3 up | + | glucosyltransferase activity                                                       | GO:0046527 | Metabolism | Metabolism | F | 190  | 28  | 9.02   | 3.1   | 7.25E-07 | 5.42E-05 |
| 7 | 1484 | F2-3 vs. S2-3 | F2-3 up | + | glutamine family amino acid metabolic process                                      | GO:0009064 | Metabolism | Metabolism | P | 58   | 13  | 2.75   | 4.72  | 1.61E-05 | 5.77E-04 |
| 7 | 1485 | F2-3 vs. S2-3 | F2-3 up | + | glutamine metabolic process                                                        | GO:0006541 | Metabolism | Metabolism | P | 15   | 5   | 0.71   | 7.02  | 1.67E-03 | 3.03E-02 |
| 7 | 1486 | F2-3 vs. S2-3 | F2-3 up | + | glycine decarboxylation via glycine cleavage system                                | GO:0019464 | Metabolism | Metabolism | P | 7    | 4   | 0.33   | 12.03 | 1.07E-03 | 2.10E-02 |
| 7 | 1487 | F2-3 vs. S2-3 | F2-3 up | + | glycine metabolic process                                                          | GO:0006544 | Metabolism | Metabolism | P | 18   | 8   | 0.85   | 9.36  | 1.31E-05 | 4.82E-04 |
| 7 | 1488 | F2-3 vs. S2-3 | F2-3 up | + | glycosinolate biosynthetic process                                                 | GO:0019758 | Metabolism | Metabolism | P | 39   | 8   | 1.85   | 4.32  | 1.13E-03 | 2.19E-02 |
| 7 | 1489 | F2-3 vs. S2-3 | F2-3 up | + | glycosinolate metabolic process                                                    | GO:0019757 | Metabolism | Metabolism | P | 112  | 15  | 5.32   | 2.82  | 6.49E-04 | 1.40E-02 |
| 7 | 1490 | F2-3 vs. S2-3 | F2-3 up | + | glycosyl compound biosynthetic process                                             | GO:1901659 | Metabolism | Metabolism | P | 62   | 10  | 2.94   | 3.4   | 1.47E-03 | 2.75E-02 |
| 7 | 1491 | F2-3 vs. S2-3 | F2-3 up | + | glycosyl compound metabolic process                                                | GO:1901657 | Metabolism | Metabolism | P | 187  | 20  | 8.88   | 2.25  | 1.95E-03 | 3.45E-02 |
| 7 | 1492 | F2-3 vs. S2-3 | F2-3 up | + | heme binding                                                                       | GO:0020037 | Metabolism | Metabolism | F | 374  | 33  | 17.76  | 1.86  | 1.57E-03 | 4.25E-02 |
| 7 | 1493 | F2-3 vs. S2-3 | F2-3 up | + | heterocycle biosynthetic process                                                   | GO:0018130 | Metabolism | Metabolism | P | 726  | 57  | 34.48  | 1.65  | 4.59E-04 | 1.04E-02 |
| 7 | 1494 | F2-3 vs. S2-3 | F2-3 up | + | homogalacturonan metabolic process                                                 | GO:0010394 | Metabolism | Metabolism | P | 4    | 3   | 0.19   | 15.79 | 2.84E-03 | 4.70E-02 |
| 7 | 1495 | F2-3 vs. S2-3 | F2-3 up | + | hydrolase activity                                                                 | GO:0016787 | Metabolism | Metabolism | F | 2995 | 245 | 142.23 | 1.72  | 3.82E-16 | 1.53E-13 |
| 7 | 1496 | F2-3 vs. S2-3 | F2-3 up | + | hydrolase activity, acting on acid anhydrides                                      | GO:0016817 | Metabolism | Metabolism | F | 802  | 67  | 38.09  | 1.76  | 2.93E-05 | 1.37E-03 |
| 7 | 1497 | F2-3 vs. S2-3 | F2-3 up | + | hydrolase activity, acting on acid anhydrides, in phosphorus-containing anhydrides | GO:0016818 | Metabolism | Metabolism | F | 796  | 67  | 37.8   | 1.77  | 1.94E-05 | 9.32E-04 |
| 7 | 1498 | F2-3 vs. S2-3 | F2-3 up | + | hydrolase activity, acting on ester bonds                                          | GO:0016788 | Metabolism | Metabolism | F | 1044 | 80  | 49.58  | 1.61  | 7.12E-05 | 3.01E-03 |
| 7 | 1499 | F2-3 vs. S2-3 | F2-3 up | + | hydrolase activity, hydrolyzing O-glycosyl compounds                               | GO:0004553 | Metabolism | Metabolism | F | 396  | 38  | 18.81  | 2.02  | 1.07E-04 | 4.25E-03 |
| 7 | 1500 | F2-3 vs. S2-3 | F2-3 up | + | hydro-lyase activity                                                               | GO:0016836 | Metabolism | Metabolism | F | 88   | 12  | 4.18   | 2.87  | 1.90E-03 | 5.00E-02 |
| 7 | 1501 | F2-3 vs. S2-3 | F2-3 up | + | intramolecular oxidoreductase activity                                             | GO:0016860 | Metabolism | Metabolism | F | 58   | 10  | 2.75   | 3.63  | 9.39E-04 | 2.62E-02 |
| 7 | 1502 | F2-3 vs. S2-3 | F2-3 up | + | intramolecular oxidoreductase activity, interconverting aldoses and ketoses        | GO:0016861 | Metabolism | Metabolism | F | 19   | 6   | 0.9    | 6.65  | 7.23E-04 | 2.13E-02 |
| 7 | 1503 | F2-3 vs. S2-3 | F2-3 up | + | ion binding                                                                        | GO:0043167 | Metabolism | Metabolism | F | 2847 | 261 | 135.21 | 1.93  | 1.45E-23 | 1.55E-20 |
| 7 | 1504 | F2-3 vs. S2-3 | F2-3 up | + | iron ion binding                                                                   | GO:0005506 | Metabolism | Metabolism | F | 325  | 31  | 15.43  | 2.01  | 7.02E-04 | 2.09E-02 |
| 7 | 1505 | F2-3 vs. S2-3 | F2-3 up | + | isomerase activity                                                                 | GO:0016853 | Metabolism | Metabolism | F | 258  | 30  | 12.25  | 2.45  | 2.32E-05 | 1.09E-03 |
| 7 | 1506 | F2-3 vs. S2-3 | F2-3 up | + | L-alanine metabolic process                                                        | GO:0042851 | Metabolism | Metabolism | P | 4    | 3   | 0.19   | 15.79 | 2.84E-03 | 4.78E-02 |
| 7 | 1507 | F2-3 vs. S2-3 | F2-3 up | + | lignin biosynthetic process                                                        | GO:0009809 | Metabolism | Metabolism | P | 42   | 9   | 1.99   | 4.51  | 4.28E-04 | 9.82E-03 |
| 7 | 1508 | F2-3 vs. S2-3 | F2-3 up | + | lignin metabolic process                                                           | GO:0009808 | Metabolism | Metabolism | P | 53   | 10  | 2.52   | 3.97  | 5.06E-04 | 1.13E-02 |
| 7 | 1509 | F2-3 vs. S2-3 | F2-3 up | + | lipid biosynthetic process                                                         | GO:0008610 | Metabolism | Metabolism | P | 512  | 51  | 24.32  | 2.1   | 2.95E-06 | 1.24E-04 |
| 7 | 1510 | F2-3 vs. S2-3 | F2-3 up | + | lipid metabolic process                                                            | GO:0006629 | Metabolism | Metabolism | P | 828  | 79  | 39.32  | 2.01  | 3.50E-08 | 2.46E-06 |
| 7 | 1511 | F2-3 vs. S2-3 | F2-3 up | + | localization                                                                       | GO:0051179 | Metabolism | Metabolism | P | 2471 | 189 | 117.35 | 1.61  | 4.01E-10 | 3.75E-08 |
| 7 | 1512 | F2-3 vs. S2-3 | F2-3 up | + | L-serine biosynthetic process                                                      | GO:0006564 | Metabolism | Metabolism | P | 7    | 4   | 0.33   | 12.03 | 1.07E-03 | 2.11E-02 |
| 7 | 1513 | F2-3 vs. S2-3 | F2-3 up | + | L-serine metabolic process                                                         | GO:0006563 | Metabolism | Metabolism | P | 30   | 8   | 1.42   | 5.62  | 2.53E-04 | 6.08E-03 |
| 7 | 1514 | F2-3 vs. S2-3 | F2-3 up | + | lyase activity                                                                     | GO:0016829 | Metabolism | Metabolism | F | 339  | 49  | 16.1   | 3.04  | 1.05E-10 | 1.78E-08 |
| 7 | 1515 | F2-3 vs. S2-3 | F2-3 up | + | magnesium ion binding                                                              | GO:0000287 | Metabolism | Metabolism | F | 126  | 17  | 5.98   | 2.84  | 2.70E-04 | 8.87E-03 |
| 7 | 1516 | F2-3 vs. S2-3 | F2-3 up | + | metabolic process                                                                  | GO:0008152 | Metabolism | Metabolism | P | 8681 | 655 | 412.27 | 1.59  | 5.32E-42 | 3.18E-38 |
| 7 | 1517 | F2-3 vs. S2-3 | F2-3 up | + | metal ion binding                                                                  | GO:0046872 | Metabolism | Metabolism | F | 1610 | 152 | 76.46  | 1.99  | 1.64E-14 | 5.26E-12 |

|   |      |               |         |   |                                                                          |            |            |            |   |       |      |         |       |          |          |
|---|------|---------------|---------|---|--------------------------------------------------------------------------|------------|------------|------------|---|-------|------|---------|-------|----------|----------|
| 7 | 1518 | F2-3 vs. S2-3 | F2-3 up | + | molecular_function                                                       | GO:0003674 | Metabolism | Metabolism | F | 21945 | 1158 | 1042.18 | 1.11  | 5.12E-17 | 2.35E-14 |
| 7 | 1519 | F2-3 vs. S2-3 | F2-3 up | + | monocarboxylic acid biosynthetic process                                 | GO:0072330 | Metabolism | Metabolism | P | 211   | 30   | 10.02   | 2.99  | 5.81E-07 | 2.78E-05 |
| 7 | 1520 | F2-3 vs. S2-3 | F2-3 up | + | monocarboxylic acid metabolic process                                    | GO:0032787 | Metabolism | Metabolism | P | 439   | 65   | 20.85   | 3.12  | 3.46E-14 | 7.14E-12 |
| 7 | 1521 | F2-3 vs. S2-3 | F2-3 up | + | monosaccharide metabolic process                                         | GO:0005996 | Metabolism | Metabolism | P | 125   | 25   | 5.94    | 4.21  | 1.73E-08 | 1.28E-06 |
| 7 | 1522 | F2-3 vs. S2-3 | F2-3 up | + | organic acid biosynthetic process                                        | GO:0016053 | Metabolism | Metabolism | P | 468   | 62   | 22.23   | 2.79  | 9.88E-12 | 1.31E-09 |
| 7 | 1523 | F2-3 vs. S2-3 | F2-3 up | + | organic acid metabolic process                                           | GO:0006082 | Metabolism | Metabolism | P | 1019  | 146  | 48.39   | 3.02  | 2.31E-29 | 2.30E-26 |
| 7 | 1524 | F2-3 vs. S2-3 | F2-3 up | + | organic cyclic compound biosynthetic process                             | GO:1901362 | Metabolism | Metabolism | P | 899   | 78   | 42.69   | 1.83  | 1.43E-06 | 6.47E-05 |
| 7 | 1525 | F2-3 vs. S2-3 | F2-3 up | + | organic hydroxy compound biosynthetic process                            | GO:1901617 | Metabolism | Metabolism | P | 172   | 21   | 8.17    | 2.57  | 1.94E-04 | 4.77E-03 |
| 7 | 1526 | F2-3 vs. S2-3 | F2-3 up | + | organic hydroxy compound metabolic process                               | GO:1901615 | Metabolism | Metabolism | P | 292   | 39   | 13.87   | 2.81  | 5.63E-08 | 3.66E-06 |
| 7 | 1527 | F2-3 vs. S2-3 | F2-3 up | + | organic substance biosynthetic process                                   | GO:1901576 | Metabolism | Metabolism | P | 2674  | 237  | 126.99  | 1.87  | 1.56E-19 | 4.90E-17 |
| 7 | 1528 | F2-3 vs. S2-3 | F2-3 up | + | organic substance metabolic process                                      | GO:0071704 | Metabolism | Metabolism | P | 7851  | 531  | 372.85  | 1.42  | 6.84E-20 | 2.41E-17 |
| 7 | 1529 | F2-3 vs. S2-3 | F2-3 up | + | organonitrogen compound biosynthetic process                             | GO:1901566 | Metabolism | Metabolism | P | 1343  | 95   | 63.78   | 1.49  | 2.55E-04 | 6.09E-03 |
| 7 | 1530 | F2-3 vs. S2-3 | F2-3 up | + | organonitrogen compound metabolic process                                | GO:1901564 | Metabolism | Metabolism | P | 4611  | 276  | 218.98  | 1.26  | 6.19E-05 | 1.81E-03 |
| 7 | 1531 | F2-3 vs. S2-3 | F2-3 up | + | organophosphate metabolic process                                        | GO:0019637 | Metabolism | Metabolism | P | 583   | 59   | 27.69   | 2.13  | 3.74E-07 | 1.91E-05 |
| 7 | 1532 | F2-3 vs. S2-3 | F2-3 up | + | oxidation-reduction process                                              | GO:0055114 | Metabolism | Metabolism | P | 768   | 118  | 36.47   | 3.24  | 4.18E-26 | 3.12E-23 |
| 7 | 1533 | F2-3 vs. S2-3 | F2-3 up | + | oxoacid metabolic process                                                | GO:0043436 | Metabolism | Metabolism | P | 1016  | 146  | 48.25   | 3.03  | 1.75E-29 | 2.10E-26 |
| 7 | 1534 | F2-3 vs. S2-3 | F2-3 up | + | pectin metabolic process                                                 | GO:0045488 | Metabolism | Metabolism | P | 162   | 28   | 7.69    | 3.64  | 3.94E-08 | 2.74E-06 |
| 7 | 1535 | F2-3 vs. S2-3 | F2-3 up | + | pectinesterase activity                                                  | GO:0030599 | Metabolism | Metabolism | F | 92    | 17   | 4.37    | 3.89  | 8.20E-06 | 4.25E-04 |
| 7 | 1536 | F2-3 vs. S2-3 | F2-3 up | + | pectinesterase inhibitor activity                                        | GO:0046910 | Metabolism | Metabolism | F | 92    | 13   | 4.37    | 2.98  | 9.34E-04 | 2.63E-02 |
| 7 | 1537 | F2-3 vs. S2-3 | F2-3 up | + | phenylpropanoid biosynthetic process                                     | GO:0009699 | Metabolism | Metabolism | P | 88    | 14   | 4.18    | 3.35  | 2.06E-04 | 4.99E-03 |
| 7 | 1538 | F2-3 vs. S2-3 | F2-3 up | + | phenylpropanoid metabolic process                                        | GO:0009698 | Metabolism | Metabolism | P | 109   | 16   | 5.18    | 3.09  | 1.73E-04 | 4.35E-03 |
| 7 | 1539 | F2-3 vs. S2-3 | F2-3 up | + | phosphate-containing compound metabolic process                          | GO:0006796 | Metabolism | Metabolism | P | 1858  | 128  | 88.24   | 1.45  | 5.39E-05 | 1.60E-03 |
| 7 | 1540 | F2-3 vs. S2-3 | F2-3 up | + | phosphatidylcholine biosynthetic process                                 | GO:0006656 | Metabolism | Metabolism | P | 9     | 4    | 0.43    | 9.36  | 2.16E-03 | 3.80E-02 |
| 7 | 1541 | F2-3 vs. S2-3 | F2-3 up | + | phosphoric ester hydrolase activity                                      | GO:0042578 | Metabolism | Metabolism | F | 392   | 37   | 18.62   | 1.99  | 2.31E-04 | 7.90E-03 |
| 7 | 1542 | F2-3 vs. S2-3 | F2-3 up | + | phosphorus metabolic process                                             | GO:0006793 | Metabolism | Metabolism | P | 1903  | 142  | 90.37   | 1.57  | 3.38E-07 | 1.77E-05 |
| 7 | 1543 | F2-3 vs. S2-3 | F2-3 up | + | polyamine biosynthetic process                                           | GO:0006596 | Metabolism | Metabolism | P | 15    | 7    | 0.71    | 9.83  | 3.62E-05 | 1.13E-03 |
| 7 | 1544 | F2-3 vs. S2-3 | F2-3 up | + | polyamine metabolic process                                              | GO:0006595 | Metabolism | Metabolism | P | 25    | 9    | 1.19    | 7.58  | 1.48E-05 | 5.35E-04 |
| 7 | 1545 | F2-3 vs. S2-3 | F2-3 up | + | proton export across plasma membrane                                     | GO:0120029 | Metabolism | Metabolism | P | 10    | 7    | 0.47    | 14.74 | 5.05E-06 | 2.03E-04 |
| 7 | 1546 | F2-3 vs. S2-3 | F2-3 up | + | purine nucleoside diphosphate metabolic                                  | GO:0009135 | Metabolism | Metabolism | P | 56    | 9    | 2.66    | 3.38  | 2.56E-03 | 4.39E-02 |
| 7 | 1547 | F2-3 vs. S2-3 | F2-3 up | + | purine nucleotide metabolic process                                      | GO:0006163 | Metabolism | Metabolism | P | 218   | 22   | 10.35   | 2.13  | 1.62E-03 | 2.96E-02 |
| 7 | 1548 | F2-3 vs. S2-3 | F2-3 up | + | purine ribonucleoside diphosphate metabolic process                      | GO:0009179 | Metabolism | Metabolism | P | 56    | 9    | 2.66    | 3.38  | 2.56E-03 | 4.41E-02 |
| 7 | 1549 | F2-3 vs. S2-3 | F2-3 up | + | purine ribonucleoside triphosphate binding                               | GO:0035639 | Metabolism | Metabolism | F | 624   | 52   | 29.63   | 1.75  | 2.32E-04 | 7.76E-03 |
| 7 | 1550 | F2-3 vs. S2-3 | F2-3 up | + | purine ribonucleotide metabolic process                                  | GO:0009150 | Metabolism | Metabolism | P | 200   | 22   | 9.5     | 2.32  | 5.48E-04 | 1.21E-02 |
| 7 | 1551 | F2-3 vs. S2-3 | F2-3 up | + | purine-containing compound metabolic process                             | GO:0072521 | Metabolism | Metabolism | P | 243   | 24   | 11.54   | 2.08  | 1.56E-03 | 2.85E-02 |
| 7 | 1552 | F2-3 vs. S2-3 | F2-3 up | + | pyridoxal phosphate binding                                              | GO:0030170 | Metabolism | Metabolism | F | 98    | 24   | 4.65    | 5.16  | 1.09E-09 | 1.53E-07 |
| 7 | 1553 | F2-3 vs. S2-3 | F2-3 up | + | pyrophosphatase activity                                                 | GO:0016462 | Metabolism | Metabolism | F | 793   | 67   | 37.66   | 1.78  | 1.84E-05 | 8.98E-04 |
| 7 | 1554 | F2-3 vs. S2-3 | F2-3 up | + | racemase and epimerase activity                                          | GO:0016854 | Metabolism | Metabolism | F | 43    | 10   | 2.04    | 4.9   | 1.16E-04 | 4.51E-03 |
| 7 | 1555 | F2-3 vs. S2-3 | F2-3 up | + | racemase and epimerase activity, acting on carbohydrates and derivatives | GO:0016857 | Metabolism | Metabolism | F | 34    | 9    | 1.61    | 5.57  | 1.10E-04 | 4.31E-03 |
| 7 | 1556 | F2-3 vs. S2-3 | F2-3 up | + | S-adenosylmethionine biosynthetic process                                | GO:0006556 | Metabolism | Metabolism | P | 4     | 3    | 0.19    | 15.79 | 2.84E-03 | 4.76E-02 |
| 7 | 1557 | F2-3 vs. S2-3 | F2-3 up | + | S-adenosylmethionine metabolic process                                   | GO:0046500 | Metabolism | Metabolism | P | 9     | 5    | 0.43    | 11.7  | 2.70E-04 | 6.43E-03 |
| 7 | 1558 | F2-3 vs. S2-3 | F2-3 up | + | secondary alcohol metabolic process                                      | GO:1902652 | Metabolism | Metabolism | P | 12    | 6    | 0.57    | 10.53 | 9.95E-05 | 2.73E-03 |
| 7 | 1559 | F2-3 vs. S2-3 | F2-3 up | + | secondary metabolic process                                              | GO:0019748 | Metabolism | Metabolism | P | 303   | 38   | 14.39   | 2.64  | 4.72E-07 | 2.37E-05 |
| 7 | 1560 | F2-3 vs. S2-3 | F2-3 up | + | secondary metabolite biosynthetic process                                | GO:0044550 | Metabolism | Metabolism | P | 144   | 23   | 6.84    | 3.36  | 2.09E-06 | 9.24E-05 |
| 7 | 1561 | F2-3 vs. S2-3 | F2-3 up | + | serine family amino acid biosynthetic process                            | GO:0009070 | Metabolism | Metabolism | P | 43    | 11   | 2.04    | 5.39  | 2.53E-05 | 8.27E-04 |
| 7 | 1562 | F2-3 vs. S2-3 | F2-3 up | + | serine family amino acid metabolic process                               | GO:0009069 | Metabolism | Metabolism | P | 58    | 15   | 2.75    | 5.45  | 7.93E-07 | 3.70E-05 |
| 7 | 1563 | F2-3 vs. S2-3 | F2-3 up | + | S-glycoside biosynthetic process                                         | GO:0016144 | Metabolism | Metabolism | P | 39    | 8    | 1.85    | 4.32  | 1.13E-03 | 2.20E-02 |
| 7 | 1564 | F2-3 vs. S2-3 | F2-3 up | + | S-glycoside metabolic process                                            | GO:0016143 | Metabolism | Metabolism | P | 112   | 15   | 5.32    | 2.82  | 6.49E-04 | 1.41E-02 |
| 7 | 1565 | F2-3 vs. S2-3 | F2-3 up | + | small molecule binding                                                   | GO:0036094 | Metabolism | Metabolism | F | 1340  | 123  | 63.64   | 1.93  | 4.12E-11 | 7.36E-09 |
| 7 | 1566 | F2-3 vs. S2-3 | F2-3 up | + | small molecule biosynthetic process                                      | GO:0044283 | Metabolism | Metabolism | P | 645   | 92   | 30.63   | 3     | 1.22E-18 | 3.65E-16 |
| 7 | 1567 | F2-3 vs. S2-3 | F2-3 up | + | small molecule metabolic process                                         | GO:0044281 | Metabolism | Metabolism | P | 1520  | 204  | 72.19   | 2.83  | 1.38E-37 | 4.13E-34 |
| 7 | 1568 | F2-3 vs. S2-3 | F2-3 up | + | spermidine metabolic process                                             | GO:0008216 | Metabolism | Metabolism | P | 13    | 5    | 0.62    | 8.1   | 9.93E-04 | 1.97E-02 |
| 7 | 1569 | F2-3 vs. S2-3 | F2-3 up | + | spermine metabolic process                                               | GO:0008215 | Metabolism | Metabolism | P | 11    | 5    | 0.52    | 9.57  | 5.46E-04 | 1.21E-02 |
| 7 | 1570 | F2-3 vs. S2-3 | F2-3 up | + | sulfur amino acid metabolic process                                      | GO:0000096 | Metabolism | Metabolism | P | 53    | 9    | 2.52    | 3.58  | 1.83E-03 | 3.28E-02 |
| 7 | 1571 | F2-3 vs. S2-3 | F2-3 up | + | sulfur compound biosynthetic process                                     | GO:0044272 | Metabolism | Metabolism | P | 142   | 30   | 6.74    | 4.45  | 2.13E-10 | 2.20E-08 |
| 7 | 1572 | F2-3 vs. S2-3 | F2-3 up | + | sulfur compound metabolic process                                        | GO:0006790 | Metabolism | Metabolism | P | 363   | 53   | 17.24   | 3.07  | 1.30E-11 | 1.66E-09 |
| 7 | 1573 | F2-3 vs. S2-3 | F2-3 up | + | tetrapyrrole binding                                                     | GO:0046906 | Metabolism | Metabolism | F | 404   | 45   | 19.19   | 2.35  | 8.33E-07 | 6.08E-05 |
| 7 | 1574 | F2-3 vs. S2-3 | F2-3 up | + | transaminase activity                                                    | GO:0008483 | Metabolism | Metabolism | F | 51    | 13   | 2.42    | 5.37  | 4.89E-06 | 2.58E-04 |
| 7 | 1575 | F2-3 vs. S2-3 | F2-3 up | + | transferase activity                                                     | GO:0016740 | Metabolism | Metabolism | F | 3411  | 221  | 161.99  | 1.36  | 3.84E-06 | 2.09E-04 |

|   |      |               |         |   |                                                                             |            |            |                      |   |      |     |        |       |          |          |
|---|------|---------------|---------|---|-----------------------------------------------------------------------------|------------|------------|----------------------|---|------|-----|--------|-------|----------|----------|
| 7 |      | F2-3 vs. S2-3 | F2-3 up | + | transferase activity, transferring alkyl or aryl (other than methyl) groups | GO:0016765 |            |                      |   |      |     |        | 2.72  | 1.40E-04 | 5.31E-03 |
|   | 1576 |               |         |   |                                                                             |            | Metabolism | Metabolism           | F | 155  | 20  | 7.36   |       |          |          |
| 7 | 1577 | F2-3 vs. S2-3 | F2-3 up | + | transferase activity, transferring glycosyl groups                          | GO:0016757 | Metabolism | Metabolism           | F | 612  | 49  | 29.06  | 1.69  | 8.47E-04 | 2.45E-02 |
| 7 | 1578 | F2-3 vs. S2-3 | F2-3 up | + | transferase activity, transferring hexosyl groups                           | GO:0016758 | Metabolism | Metabolism           | F | 353  | 40  | 16.76  | 2.39  | 2.01E-06 | 1.17E-04 |
| 7 |      | F2-3 vs. S2-3 | F2-3 up | + | transferase activity, transferring nitrogenous groups                       | GO:0016769 |            |                      |   |      |     |        | 5.67  | 1.23E-06 | 8.38E-05 |
|   | 1579 |               |         |   |                                                                             |            | Metabolism | Metabolism           | F | 52   | 14  | 2.47   |       |          |          |
| 7 | 1580 | F2-3 vs. S2-3 | F2-3 up | + | transition metal ion binding                                                | GO:0046914 | Metabolism | Metabolism           | F | 1178 | 113 | 55.94  | 2.02  | 2.56E-11 | 5.14E-09 |
| 7 | 1581 | F2-3 vs. S2-3 | F2-3 up | + | UDP-arabinose 4-epimerase activity                                          | GO:0050373 | Metabolism | Metabolism           | F | 6    | 5   | 0.28   | 17.55 | 6.98E-05 | 2.99E-03 |
| 7 | 1582 | F2-3 vs. S2-3 | F2-3 up | + | UDP-glucose 4-epimerase activity                                            | GO:0003978 | Metabolism | Metabolism           | F | 9    | 6   | 0.43   | 14.04 | 3.02E-05 | 1.39E-03 |
| 7 | 1583 | F2-3 vs. S2-3 | F2-3 up | + | UDP-glucosyltransferase activity                                            | GO:0035251 | Metabolism | Metabolism           | F | 143  | 23  | 6.79   | 3.39  | 1.88E-06 | 1.18E-04 |
| 7 | 1584 | F2-3 vs. S2-3 | F2-3 up | + | UDP-glycosyltransferase activity                                            | GO:0008194 | Metabolism | Metabolism           | F | 280  | 35  | 13.3   | 2.63  | 1.49E-06 | 9.95E-05 |
| 7 | 1585 | F2-3 vs. S2-3 | F2-3 up | + | UDP-L-arabinose biosynthetic process                                        | GO:0033358 | Metabolism | Metabolism           | P | 6    | 5   | 0.28   | 17.55 | 6.98E-05 | 2.00E-03 |
| 7 | 1586 | F2-3 vs. S2-3 | F2-3 up | + | UDP-L-arabinose metabolic process                                           | GO:0033356 | Metabolism | Metabolism           | P | 12   | 7   | 0.57   | 12.28 | 1.21E-05 | 4.48E-04 |
| 7 | 1587 | F2-3 vs. S2-3 | F2-3 up | + | vitamin B6 binding                                                          | GO:0070279 | Metabolism | Metabolism           | F | 98   | 24  | 4.65   | 5.16  | 1.09E-09 | 1.60E-07 |
| 7 | 1588 | F2-3 vs. S2-3 | F2-3 up | + | vitamin binding                                                             | GO:0019842 | Metabolism | Metabolism           | F | 134  | 25  | 6.36   | 3.93  | 5.71E-08 | 5.74E-06 |
| 7 | 1589 | F2-3 vs. S2-3 | F2-3 up | + | wax biosynthetic process                                                    | GO:0010025 | Metabolism | Metabolism           | P | 27   | 7   | 1.28   | 5.46  | 7.10E-04 | 1.51E-02 |
| 7 | 1590 | F2-3 vs. S2-3 | F2-3 up | + | wax metabolic process                                                       | GO:0010166 | Metabolism | Metabolism           | P | 28   | 7   | 1.33   | 5.26  | 8.53E-04 | 1.74E-02 |
| 7 | 1591 | F2-3 vs. S2-3 | F2-3 up | + | carbon fixation                                                             | GO:0015977 | Metabolism | Photosynthesis       | P | 16   | 10  | 0.76   | 13.16 | 9.68E-08 | 6.03E-06 |
| 7 | 1592 | F2-3 vs. S2-3 | F2-3 up | + | chlorophyll binding                                                         | GO:0016168 | Metabolism | Photosynthesis       | F | 28   | 12  | 1.33   | 9.02  | 1.23E-07 | 1.16E-05 |
| 7 | 1593 | F2-3 vs. S2-3 | F2-3 up | + | chloroplast                                                                 | GO:0009507 | Metabolism | Photosynthesis       | C | 5013 | 424 | 238.07 | 1.78  | 3.64E-33 | 7.59E-31 |
| 7 | 1594 | F2-3 vs. S2-3 | F2-3 up | + | chloroplast envelope                                                        | GO:0009941 | Metabolism | Photosynthesis       | C | 613  | 104 | 29.11  | 3.57  | 4.83E-26 | 5.02E-24 |
| 7 | 1595 | F2-3 vs. S2-3 | F2-3 up | + | chloroplast stroma                                                          | GO:0009570 | Metabolism | Photosynthesis       | C | 719  | 131 | 34.15  | 3.84  | 2.02E-35 | 7.02E-33 |
| 7 | 1596 | F2-3 vs. S2-3 | F2-3 up | + | chloroplast thylakoid                                                       | GO:0009534 | Metabolism | Photosynthesis       | C | 443  | 86  | 21.04  | 4.09  | 4.14E-25 | 3.91E-23 |
| 7 | 1597 | F2-3 vs. S2-3 | F2-3 up | + | chloroplast thylakoid membrane                                              | GO:0009535 | Metabolism | Photosynthesis       | C | 358  | 76  | 17     | 4.47  | 2.30E-24 | 1.60E-22 |
| 7 | 1598 | F2-3 vs. S2-3 | F2-3 up | + | chloroplast thylakoid membrane protein complex                              | GO:0098807 | Metabolism | Photosynthesis       | C | 24   | 7   | 1.14   | 6.14  | 3.91E-04 | 6.07E-03 |
| 7 | 1599 | F2-3 vs. S2-3 | F2-3 up | + | fructose 1,6-bisphosphate metabolic process                                 | GO:0030388 | Metabolism | Photosynthesis       | P | 12   | 5   | 0.57   | 8.77  | 7.45E-04 | 1.56E-02 |
| 7 | 1600 | F2-3 vs. S2-3 | F2-3 up | + | oxidative photosynthetic carbon pathway                                     | GO:0009854 | Metabolism | Photosynthesis       | P | 7    | 5   | 0.33   | 15.04 | 1.15E-04 | 3.04E-03 |
| 7 | 1601 | F2-3 vs. S2-3 | F2-3 up | + | photosynthesis                                                              | GO:0015979 | Metabolism | Photosynthesis       | P | 189  | 50  | 8.98   | 5.57  | 7.40E-20 | 2.46E-17 |
| 7 | 1602 | F2-3 vs. S2-3 | F2-3 up | + | photosynthesis, dark reaction                                               | GO:0019685 | Metabolism | Photosynthesis       | P | 15   | 9   | 0.71   | 12.63 | 5.55E-07 | 2.70E-05 |
| 7 | 1603 | F2-3 vs. S2-3 | F2-3 up | + | photosynthesis, light harvesting                                            | GO:0009765 | Metabolism | Photosynthesis       | P | 42   | 13  | 1.99   | 6.52  | 7.89E-07 | 3.72E-05 |
| 7 | 1604 | F2-3 vs. S2-3 | F2-3 up | + | photosynthesis, light harvesting in photosystem I                           | GO:0009768 | Metabolism | Photosynthesis       | P | 24   | 10  | 1.14   | 8.77  | 1.71E-06 | 7.71E-05 |
| 7 | 1605 | F2-3 vs. S2-3 | F2-3 up | + | photosynthesis, light reaction                                              | GO:0019684 | Metabolism | Photosynthesis       | P | 128  | 33  | 6.08   | 5.43  | 2.57E-13 | 4.81E-11 |
| 7 | 1606 | F2-3 vs. S2-3 | F2-3 up | + | photosynthetic electron transport chain                                     | GO:0009767 | Metabolism | Photosynthesis       | P | 46   | 11  | 2.18   | 5.04  | 4.31E-05 | 1.31E-03 |
| 7 | 1607 | F2-3 vs. S2-3 | F2-3 up | + | photosynthetic electron transport in photosystem                            | GO:0009773 | Metabolism | Photosynthesis       | P | 17   | 5   | 0.81   | 6.19  | 2.62E-03 | 4.46E-02 |
| 7 | 1608 | F2-3 vs. S2-3 | F2-3 up | + | photosynthetic membrane                                                     | GO:0034357 | Metabolism | Photosynthesis       | C | 395  | 81  | 18.76  | 4.32  | 4.80E-25 | 4.16E-23 |
| 7 | 1609 | F2-3 vs. S2-3 | F2-3 up | + | photosystem                                                                 | GO:0009521 | Metabolism | Photosynthesis       | C | 63   | 15  | 2.99   | 5.01  | 1.92E-06 | 5.01E-05 |
| 7 | 1610 | F2-3 vs. S2-3 | F2-3 up | + | photosystem I                                                               | GO:0009522 | Metabolism | Photosynthesis       | C | 22   | 6   | 1.04   | 5.74  | 1.37E-03 | 1.93E-02 |
| 7 | 1611 | F2-3 vs. S2-3 | F2-3 up | + | photosystem II                                                              | GO:0009523 | Metabolism | Photosynthesis       | C | 44   | 10  | 2.09   | 4.79  | 1.37E-04 | 2.30E-03 |
| 7 | 1612 | F2-3 vs. S2-3 | F2-3 up | + | photosystem II assembly                                                     | GO:0010207 | Metabolism | Photosynthesis       | P | 26   | 9   | 1.23   | 7.29  | 1.91E-05 | 6.67E-04 |
| 7 | 1613 | F2-3 vs. S2-3 | F2-3 up | + | plastid                                                                     | GO:0009536 | Metabolism | Photosynthesis       | C | 5432 | 461 | 257.97 | 1.79  | 3.04E-37 | 1.58E-34 |
| 7 | 1614 | F2-3 vs. S2-3 | F2-3 up | + | plastid envelope                                                            | GO:0009526 | Metabolism | Photosynthesis       | C | 637  | 111 | 30.25  | 3.67  | 1.30E-28 | 1.69E-26 |
| 7 | 1615 | F2-3 vs. S2-3 | F2-3 up | + | plastid stroma                                                              | GO:0009532 | Metabolism | Photosynthesis       | C | 731  | 131 | 34.72  | 3.77  | 8.90E-35 | 2.32E-32 |
| 7 | 1616 | F2-3 vs. S2-3 | F2-3 up | + | plastid thylakoid                                                           | GO:0031976 | Metabolism | Photosynthesis       | C | 446  | 86  | 21.18  | 4.06  | 6.17E-25 | 4.94E-23 |
| 7 | 1617 | F2-3 vs. S2-3 | F2-3 up | + | plastid thylakoid membrane                                                  | GO:0055035 | Metabolism | Photosynthesis       | C | 363  | 76  | 17.24  | 4.41  | 4.81E-24 | 3.13E-22 |
| 7 | 1618 | F2-3 vs. S2-3 | F2-3 up | + | plastoglobule                                                               | GO:0010287 | Metabolism | Photosynthesis       | C | 76   | 26  | 3.61   | 7.2   | 4.19E-13 | 1.68E-11 |
| 7 | 1619 | F2-3 vs. S2-3 | F2-3 up | + | regulation of photosynthesis                                                | GO:0010109 | Metabolism | Photosynthesis       | P | 40   | 9   | 1.9    | 4.74  | 3.14E-04 | 7.42E-03 |
| 7 | 1620 | F2-3 vs. S2-3 | F2-3 up | + | thylakoid                                                                   | GO:0009579 | Metabolism | Photosynthesis       | C | 537  | 101 | 25.5   | 3.96  | 2.23E-28 | 2.58E-26 |
| 7 | 1621 | F2-3 vs. S2-3 | F2-3 up | + | thylakoid lumen                                                             | GO:0031977 | Metabolism | Photosynthesis       | C | 63   | 13  | 2.99   | 4.35  | 3.43E-05 | 6.06E-04 |
| 7 | 1622 | F2-3 vs. S2-3 | F2-3 up | + | thylakoid membrane                                                          | GO:0042651 | Metabolism | Photosynthesis       | C | 390  | 80  | 18.52  | 4.32  | 9.32E-25 | 6.93E-23 |
| 7 | 1623 | F2-3 vs. S2-3 | F2-3 up | + | endoplasmic reticulum                                                       | GO:0005783 | Regulation | Protein modification | C | 1044 | 85  | 49.58  | 1.71  | 5.11E-06 | 1.21E-04 |
| 7 | 1624 | F2-3 vs. S2-3 | F2-3 up | + | Golgi apparatus                                                             | GO:0005794 | Regulation | Protein modification | C | 1161 | 105 | 55.14  | 1.9   | 2.77E-09 | 9.61E-08 |
| 7 | 1625 | F2-3 vs. S2-3 | F2-3 up | + | negative regulation of protein polymerization                               | GO:0032272 | Regulation | Protein modification | P | 15   | 5   | 0.71   | 7.02  | 1.67E-03 | 3.02E-02 |
| 7 |      | F2-3 vs. S2-3 | F2-3 up | + | negative regulation of protein-containing complex assembly                  | GO:0031333 |            |                      |   |      |     |        | 7.02  | 1.67E-03 | 3.04E-02 |
|   | 1626 |               |         |   |                                                                             |            | Regulation | Protein modification | P | 15   | 5   | 0.71   |       |          |          |
| 7 | 1627 | F2-3 vs. S2-3 | F2-3 up | - | molecular function regulator                                                | GO:0098772 | Regulation | Regulation           | F | 2397 | 76  | 113.83 | 0.67  | 1.46E-04 | 5.44E-03 |
| 7 | 1628 | F2-3 vs. S2-3 | F2-3 up | - | regulation of biosynthetic process                                          | GO:0009889 | Regulation | Regulation           | P | 2514 | 76  | 119.39 | 0.64  | 1.94E-05 | 6.72E-04 |
| 7 | 1629 | F2-3 vs. S2-3 | F2-3 up | - | regulation of cellular biosynthetic process                                 | GO:0031326 | Regulation | Regulation           | P | 2477 | 72  | 117.63 | 0.61  | 5.26E-06 | 2.10E-04 |
| 7 |      | F2-3 vs. S2-3 | F2-3 up | - | regulation of cellular macromolecule biosynthetic process                   | GO:2000112 |            |                      |   |      |     |        | 0.55  | 1.76E-07 | 9.75E-06 |
|   | 1630 |               |         |   |                                                                             |            | Regulation | Regulation           | P | 2365 | 62  | 112.32 |       |          |          |
| 7 | 1631 | F2-3 vs. S2-3 | F2-3 up | - | regulation of cellular metabolic process                                    | GO:0031323 | Regulation | Regulation           | P | 2975 | 97  | 141.28 | 0.69  | 6.29E-05 | 1.83E-03 |
| 7 | 1632 | F2-3 vs. S2-3 | F2-3 up | - | regulation of macromolecule biosynthetic process                            | GO:0010556 | Regulation | Regulation           | P | 2378 | 62  | 112.93 | 0.55  | 1.41E-07 | 7.94E-06 |
| 7 | 1633 | F2-3 vs. S2-3 | F2-3 up | - | regulation of macromolecule metabolic process                               | GO:0060255 | Regulation | Regulation           | P | 3058 | 77  | 145.23 | 0.53  | 2.09E-10 | 2.20E-08 |



|   |      |               |         |   |                                                                |            |                        |            |   |      |     |        |      |          |          |
|---|------|---------------|---------|---|----------------------------------------------------------------|------------|------------------------|------------|---|------|-----|--------|------|----------|----------|
| 7 | 1634 | F2-3 vs. S2-3 | F2-3 up | - | regulation of metabolic process                                | GO:0019222 | Regulation             | Regulation | P | 3325 | 106 | 157.91 | 0.67 | 6.39E-06 | 2.43E-04 |
| 7 |      | F2-3 vs. S2-3 | F2-3 up | - | regulation of nitrogen compound metabolic process              | GO:0051171 |                        |            |   |      |     |        | 0.57 | 6.14E-08 | 3.91E-06 |
|   | 1635 |               |         |   |                                                                |            | Regulation             | Regulation | P | 2741 | 74  | 130.17 |      |          |          |
| 7 |      | F2-3 vs. S2-3 | F2-3 up | - | regulation of nucleobase-containing compound metabolic process | GO:0019219 |                        |            |   |      |     |        | 0.53 | 4.80E-08 | 3.19E-06 |
|   | 1636 |               |         |   |                                                                |            | Regulation             | Regulation | P | 2344 | 59  | 111.32 |      |          |          |
| 7 | 1637 | F2-3 vs. S2-3 | F2-3 up | - | regulation of primary metabolic process                        | GO:0080090 | Regulation             | Regulation | P | 2825 | 82  | 134.16 | 0.61 | 9.19E-07 | 4.26E-05 |
| 7 | 1638 | F2-3 vs. S2-3 | F2-3 up | + | negative regulation of cytoskeleton organization               | GO:0051494 | Regulation             | Regulation | P | 17   | 5   | 0.81   | 6.19 | 2.62E-03 | 4.47E-02 |
| 7 |      | F2-3 vs. S2-3 | F2-3 up | + | negative regulation of supramolecular fiber organization       | GO:1902904 |                        |            |   |      |     |        | 6.19 | 2.62E-03 | 4.48E-02 |
|   | 1639 |               |         |   |                                                                |            | Regulation             | Regulation | P | 17   | 5   | 0.81   |      |          |          |
| 7 | 1640 | F2-3 vs. S2-3 | F2-3 up | + | regulation of biological quality                               | GO:0065008 | Regulation             | Regulation | P | 972  | 69  | 46.16  | 1.49 | 1.78E-03 | 3.20E-02 |
| 7 |      | F2-3 vs. S2-3 | F2-3 up | + | regulation of cell morphogenesis involved in differentiation   | GO:0010769 |                        |            |   |      |     |        | 5.26 | 6.94E-05 | 1.99E-03 |
|   | 1641 |               |         |   |                                                                |            | Regulation             | Regulation | P | 40   | 10  | 1.9    |      |          |          |
| 7 | 1642 | F2-3 vs. S2-3 | F2-3 up | + | regulation of pollen tube growth                               | GO:0080092 | Regulation             | Regulation | P | 35   | 10  | 1.66   | 6.02 | 2.65E-05 | 8.56E-04 |
| 7 | 1643 | F2-3 vs. S2-3 | F2-3 up | + | regulation of unidimensional cell growth                       | GO:0051510 | Regulation             | Regulation | P | 74   | 12  | 3.51   | 3.41 | 4.93E-04 | 1.11E-02 |
| 7 | 1644 | F2-3 vs. S2-3 | F2-3 up | + | acid phosphatase activity                                      | GO:0003993 | Signaling and response | Signaling  | F | 45   | 10  | 2.14   | 4.68 | 1.61E-04 | 5.88E-03 |
| 7 | 1645 | F2-3 vs. S2-3 | F2-3 up | + | cellular response to external stimulus                         | GO:0071496 | Signaling and response | Signaling  | P | 219  | 23  | 10.4   | 2.21 | 8.58E-04 | 1.75E-02 |
| 7 | 1646 | F2-3 vs. S2-3 | F2-3 up | + | cellular response to extracellular stimulus                    | GO:0031668 | Signaling and response | Signaling  | P | 213  | 23  | 10.12  | 2.27 | 6.99E-04 | 1.49E-02 |
| 7 | 1647 | F2-3 vs. S2-3 | F2-3 up | + | jasmonic acid biosynthetic process                             | GO:0009695 | Signaling and response | Signaling  | P | 26   | 7   | 1.23   | 5.67 | 5.87E-04 | 1.28E-02 |
| 7 | 1648 | F2-3 vs. S2-3 | F2-3 up | + | multicellular organismal process                               | GO:0032501 | Signaling and response | Signaling  | P | 2741 | 180 | 130.17 | 1.38 | 1.86E-05 | 6.59E-04 |
| 7 | 1649 | F2-3 vs. S2-3 | F2-3 up | + | multi-organism process                                         | GO:0051704 | Signaling and response | Signaling  | P | 527  | 45  | 25.03  | 1.8  | 3.43E-04 | 8.04E-03 |
| 7 | 1650 | F2-3 vs. S2-3 | F2-3 up | + | phosphatase activity                                           | GO:0016791 | Signaling and response | Signaling  | F | 328  | 34  | 15.58  | 2.18 | 6.21E-05 | 2.77E-03 |
| 7 | 1651 | F2-3 vs. S2-3 | F2-3 up | + | response to abiotic stimulus                                   | GO:0009628 | Signaling and response | Signaling  | P | 2131 | 213 | 101.2  | 2.1  | 3.37E-23 | 1.44E-20 |
| 7 | 1652 | F2-3 vs. S2-3 | F2-3 up | + | response to acid chemical                                      | GO:0001101 | Signaling and response | Signaling  | P | 397  | 43  | 18.85  | 2.28 | 2.46E-06 | 1.06E-04 |
| 7 | 1653 | F2-3 vs. S2-3 | F2-3 up | + | response to bacterium                                          | GO:0009617 | Signaling and response | Signaling  | P | 508  | 60  | 24.13  | 2.49 | 1.32E-09 | 1.18E-07 |
| 7 | 1654 | F2-3 vs. S2-3 | F2-3 up | + | response to biotic stimulus                                    | GO:0009607 | Signaling and response | Signaling  | P | 1098 | 114 | 52.14  | 2.19 | 1.35E-13 | 2.60E-11 |
| 7 | 1655 | F2-3 vs. S2-3 | F2-3 up | + | response to cadmium ion                                        | GO:0046686 | Signaling and response | Signaling  | P | 315  | 61  | 14.96  | 4.08 | 4.16E-18 | 1.18E-15 |
| 7 | 1656 | F2-3 vs. S2-3 | F2-3 up | + | response to carbohydrate                                       | GO:0009743 | Signaling and response | Signaling  | P | 153  | 17  | 7.27   | 2.34 | 2.29E-03 | 3.98E-02 |
| 7 | 1657 | F2-3 vs. S2-3 | F2-3 up | + | response to chemical                                           | GO:0042221 | Signaling and response | Signaling  | P | 2681 | 254 | 127.32 | 1.99 | 8.93E-25 | 5.34E-22 |
| 7 | 1658 | F2-3 vs. S2-3 | F2-3 up | + | response to disaccharide                                       | GO:0034285 | Signaling and response | Signaling  | P | 72   | 11  | 3.42   | 3.22 | 1.29E-03 | 2.44E-02 |
| 7 | 1659 | F2-3 vs. S2-3 | F2-3 up | + | response to endogenous stimulus                                | GO:0009719 | Signaling and response | Signaling  | P | 1271 | 101 | 60.36  | 1.67 | 1.98E-06 | 8.82E-05 |
| 7 | 1660 | F2-3 vs. S2-3 | F2-3 up | + | response to external biotic stimulus                           | GO:0043207 | Signaling and response | Signaling  | P | 1097 | 113 | 52.1   | 2.17 | 3.61E-13 | 6.16E-11 |
| 7 | 1661 | F2-3 vs. S2-3 | F2-3 up | + | response to external stimulus                                  | GO:0009605 | Signaling and response | Signaling  | P | 1513 | 151 | 71.85  | 2.1  | 2.18E-16 | 5.20E-14 |
| 7 | 1662 | F2-3 vs. S2-3 | F2-3 up | + | response to extracellular stimulus                             | GO:0009991 | Signaling and response | Signaling  | P | 262  | 30  | 12.44  | 2.41 | 4.65E-05 | 1.40E-03 |
| 7 | 1663 | F2-3 vs. S2-3 | F2-3 up | + | response to far red light                                      | GO:0010218 | Signaling and response | Signaling  | P | 43   | 9   | 2.04   | 4.41 | 4.98E-04 | 1.11E-02 |
| 7 | 1664 | F2-3 vs. S2-3 | F2-3 up | + | response to hormone                                            | GO:0009725 | Signaling and response | Signaling  | P | 1241 | 101 | 58.94  | 1.71 | 5.56E-07 | 2.68E-05 |
| 7 | 1665 | F2-3 vs. S2-3 | F2-3 up | + | response to inorganic substance                                | GO:0010035 | Signaling and response | Signaling  | P | 914  | 120 | 43.41  | 2.76 | 2.90E-21 | 1.16E-18 |
| 7 | 1666 | F2-3 vs. S2-3 | F2-3 up | + | response to jasmonic acid                                      | GO:0009753 | Signaling and response | Signaling  | P | 175  | 25  | 8.31   | 3.01 | 4.58E-06 | 1.87E-04 |
| 7 | 1667 | F2-3 vs. S2-3 | F2-3 up | + | response to karrikin                                           | GO:0080167 | Signaling and response | Signaling  | P | 128  | 26  | 6.08   | 4.28 | 6.83E-09 | 5.67E-07 |
| 7 | 1668 | F2-3 vs. S2-3 | F2-3 up | + | response to light stimulus                                     | GO:0009416 | Signaling and response | Signaling  | P | 713  | 77  | 33.86  | 2.27 | 3.15E-10 | 3.03E-08 |
| 7 | 1669 | F2-3 vs. S2-3 | F2-3 up | + | response to lipid                                              | GO:0033993 | Signaling and response | Signaling  | P | 672  | 59  | 31.91  | 1.85 | 1.94E-05 | 6.68E-04 |
| 7 | 1670 | F2-3 vs. S2-3 | F2-3 up | + | response to metal ion                                          | GO:0010038 | Signaling and response | Signaling  | P | 433  | 71  | 20.56  | 3.45 | 2.04E-17 | 5.55E-15 |
| 7 | 1671 | F2-3 vs. S2-3 | F2-3 up | + | response to nutrient levels                                    | GO:0031667 | Signaling and response | Signaling  | P | 222  | 25  | 10.54  | 2.37 | 1.70E-04 | 4.31E-03 |
| 7 | 1672 | F2-3 vs. S2-3 | F2-3 up | + | response to organic substance                                  | GO:0010033 | Signaling and response | Signaling  | P | 1705 | 143 | 80.97  | 1.77 | 2.99E-10 | 2.93E-08 |
| 7 | 1673 | F2-3 vs. S2-3 | F2-3 up | + | response to oxygen-containing compound                         | GO:1901700 | Signaling and response | Signaling  | P | 1514 | 152 | 71.9   | 2.11 | 1.25E-16 | 3.11E-14 |
| 7 | 1674 | F2-3 vs. S2-3 | F2-3 up | + | response to stimulus                                           | GO:0050896 | Signaling and response | Signaling  | P | 5578 | 445 | 264.9  | 1.68 | 1.24E-29 | 1.86E-26 |
| 7 | 1675 | F2-3 vs. S2-3 | F2-3 up | + | response to sucrose                                            | GO:0009744 | Signaling and response | Signaling  | P | 70   | 11  | 3.32   | 3.31 | 1.05E-03 | 2.07E-02 |
| 7 | 1676 | F2-3 vs. S2-3 | F2-3 up | + | response to temperature stimulus                               | GO:0009266 | Signaling and response | Signaling  | P | 617  | 77  | 29.3   | 2.63 | 7.04E-13 | 1.05E-10 |
| 7 | 1677 | F2-3 vs. S2-3 | F2-3 up | + | response to water                                              | GO:0009415 | Signaling and response | Signaling  | P | 365  | 43  | 17.33  | 2.48 | 3.98E-07 | 2.01E-05 |
| 7 | 1678 | F2-3 vs. S2-3 | F2-3 up | - | cellular response to DNA damage stimulus                       | GO:0006974 | Signaling and response | Stress     | P | 350  | 4   | 16.62  | 0.24 | 6.83E-04 | 1.46E-02 |
| 7 | 1679 | F2-3 vs. S2-3 | F2-3 up | + | aging                                                          | GO:0007568 | Signaling and response | Stress     | P | 132  | 23  | 6.27   | 3.67 | 5.54E-07 | 2.72E-05 |
| 7 | 1680 | F2-3 vs. S2-3 | F2-3 up | + | anion homeostasis                                              | GO:0055081 | Signaling and response | Stress     | P | 43   | 10  | 2.04   | 4.9  | 1.16E-04 | 3.05E-03 |
| 7 | 1681 | F2-3 vs. S2-3 | F2-3 up | + | cellular homeostasis                                           | GO:0019725 | Signaling and response | Stress     | P | 275  | 26  | 13.06  | 1.99 | 1.84E-03 | 3.28E-02 |
| 7 | 1682 | F2-3 vs. S2-3 | F2-3 up | + | cellular monovalent inorganic cation                           | GO:0030004 | Signaling and response | Stress     | P | 39   | 8   | 1.85   | 4.32 | 1.13E-03 | 2.18E-02 |
| 7 | 1683 | F2-3 vs. S2-3 | F2-3 up | + | cellular response to phosphate starvation                      | GO:0016036 | Signaling and response | Stress     | P | 75   | 12  | 3.56   | 3.37 | 5.48E-04 | 1.21E-02 |
| 7 | 1684 | F2-3 vs. S2-3 | F2-3 up | + | chemical homeostasis                                           | GO:0048878 | Signaling and response | Stress     | P | 415  | 42  | 19.71  | 2.13 | 1.91E-05 | 6.71E-04 |
| 7 | 1685 | F2-3 vs. S2-3 | F2-3 up | + | defense response                                               | GO:0006952 | Signaling and response | Stress     | P | 953  | 87  | 45.26  | 1.92 | 4.79E-08 | 3.22E-06 |
| 7 | 1686 | F2-3 vs. S2-3 | F2-3 up | + | defense response to bacterium                                  | GO:0042742 | Signaling and response | Stress     | P | 414  | 51  | 19.66  | 2.59 | 6.60E-09 | 5.56E-07 |
| 7 | 1687 | F2-3 vs. S2-3 | F2-3 up | + | defense response to fungus                                     | GO:0050832 | Signaling and response | Stress     | P | 252  | 26  | 11.97  | 2.17 | 6.58E-04 | 1.41E-02 |
| 7 | 1688 | F2-3 vs. S2-3 | F2-3 up | + | defense response to other organism                             | GO:0098542 | Signaling and response | Stress     | P | 807  | 76  | 38.32  | 1.98 | 9.82E-08 | 6.05E-06 |
| 7 | 1689 | F2-3 vs. S2-3 | F2-3 up | + | flavonoid biosynthetic process                                 | GO:0009813 | Signaling and response | Stress     | P | 54   | 11  | 2.56   | 4.29 | 1.50E-04 | 3.88E-03 |
| 7 | 1690 | F2-3 vs. S2-3 | F2-3 up | + | flavonoid metabolic process                                    | GO:0009812 | Signaling and response | Stress     | P | 63   | 11  | 2.99   | 3.68 | 4.83E-04 | 1.09E-02 |
| 7 | 1691 | F2-3 vs. S2-3 | F2-3 up | + | glutathione metabolic process                                  | GO:0006749 | Signaling and response | Stress     | P | 44   | 8   | 2.09   | 3.83 | 2.22E-03 | 3.88E-02 |

|   |      |               |         |   |                                                    |            |                        |               |   |      |     |        |       |          |          |
|---|------|---------------|---------|---|----------------------------------------------------|------------|------------------------|---------------|---|------|-----|--------|-------|----------|----------|
| 7 | 1692 | F2-3 vs. S2-3 | F2-3 up | + | homeostatic process                                | GO:0042592 | Signaling and response | Stress        | P | 537  | 51  | 25.5   | 2     | 1.23E-05 | 4.53E-04 |
| 7 | 1693 | F2-3 vs. S2-3 | F2-3 up | + | hydrogen peroxide biosynthetic process             | GO:0050665 | Signaling and response | Stress        | P | 8    | 4   | 0.38   | 10.53 | 1.55E-03 | 2.86E-02 |
| 7 | 1694 | F2-3 vs. S2-3 | F2-3 up | + | hydrogen peroxide metabolic process                | GO:0042743 | Signaling and response | Stress        | P | 36   | 8   | 1.71   | 4.68  | 7.21E-04 | 1.52E-02 |
| 7 | 1695 | F2-3 vs. S2-3 | F2-3 up | + | inorganic ion homeostasis                          | GO:0098771 | Signaling and response | Stress        | P | 250  | 24  | 11.87  | 2.02  | 1.96E-03 | 3.47E-02 |
| 7 | 1696 | F2-3 vs. S2-3 | F2-3 up | + | interspecies interaction between organisms         | GO:0044419 | Signaling and response | Stress        | P | 1125 | 115 | 53.43  | 2.15  | 2.66E-13 | 4.82E-11 |
| 7 | 1697 | F2-3 vs. S2-3 | F2-3 up | + | ion homeostasis                                    | GO:0050801 | Signaling and response | Stress        | P | 290  | 30  | 13.77  | 2.18  | 1.94E-04 | 4.76E-03 |
| 7 | 1698 | F2-3 vs. S2-3 | F2-3 up | + | monovalent inorganic cation homeostasis            | GO:0055067 | Signaling and response | Stress        | P | 79   | 11  | 3.75   | 2.93  | 2.49E-03 | 4.32E-02 |
| 7 | 1699 | F2-3 vs. S2-3 | F2-3 up | + | reactive oxygen species metabolic process          | GO:0072593 | Signaling and response | Stress        | P | 69   | 14  | 3.28   | 4.27  | 2.04E-05 | 6.94E-04 |
| 7 | 1700 | F2-3 vs. S2-3 | F2-3 up | + | regulation of cellular pH                          | GO:0030641 | Signaling and response | Stress        | P | 28   | 8   | 1.33   | 6.02  | 1.70E-04 | 4.34E-03 |
| 7 | 1701 | F2-3 vs. S2-3 | F2-3 up | + | regulation of intracellular pH                     | GO:0051453 | Signaling and response | Stress        | P | 28   | 8   | 1.33   | 6.02  | 1.70E-04 | 4.32E-03 |
| 7 | 1702 | F2-3 vs. S2-3 | F2-3 up | + | regulation of pH                                   | GO:0006885 | Signaling and response | Stress        | P | 57   | 10  | 2.71   | 3.69  | 8.34E-04 | 1.73E-02 |
| 7 | 1703 | F2-3 vs. S2-3 | F2-3 up | + | regulation of stomatal movement                    | GO:0010119 | Signaling and response | Stress        | P | 95   | 16  | 4.51   | 3.55  | 4.09E-05 | 1.26E-03 |
| 7 | 1704 | F2-3 vs. S2-3 | F2-3 up | + | response to abscisic acid                          | GO:0009737 | Signaling and response | Stress        | P | 497  | 49  | 23.6   | 2.08  | 5.92E-06 | 2.28E-04 |
| 7 | 1705 | F2-3 vs. S2-3 | F2-3 up | + | response to alcohol                                | GO:0097305 | Signaling and response | Stress        | P | 501  | 49  | 23.79  | 2.06  | 9.93E-06 | 3.71E-04 |
| 7 | 1706 | F2-3 vs. S2-3 | F2-3 up | + | response to cold                                   | GO:0009409 | Signaling and response | Stress        | P | 415  | 64  | 19.71  | 3.25  | 1.03E-14 | 2.20E-12 |
| 7 | 1707 | F2-3 vs. S2-3 | F2-3 up | + | response to desiccation                            | GO:0009269 | Signaling and response | Stress        | P | 24   | 7   | 1.14   | 6.14  | 3.91E-04 | 9.06E-03 |
| 7 | 1708 | F2-3 vs. S2-3 | F2-3 up | + | response to fungus                                 | GO:0009620 | Signaling and response | Stress        | P | 350  | 36  | 16.62  | 2.17  | 5.70E-05 | 1.68E-03 |
| 7 | 1709 | F2-3 vs. S2-3 | F2-3 up | + | response to high light intensity                   | GO:0009644 | Signaling and response | Stress        | P | 60   | 13  | 2.85   | 4.56  | 2.20E-05 | 7.26E-04 |
| 7 | 1710 | F2-3 vs. S2-3 | F2-3 up | + | response to nematode                               | GO:0009624 | Signaling and response | Stress        | P | 82   | 15  | 3.89   | 3.85  | 3.05E-05 | 9.64E-04 |
| 7 | 1711 | F2-3 vs. S2-3 | F2-3 up | + | response to osmotic stress                         | GO:0006970 | Signaling and response | Stress        | P | 528  | 45  | 25.07  | 1.79  | 3.50E-04 | 8.18E-03 |
| 7 | 1712 | F2-3 vs. S2-3 | F2-3 up | + | response to other organism                         | GO:0051707 | Signaling and response | Stress        | P | 1097 | 113 | 52.1   | 2.17  | 3.61E-13 | 5.99E-11 |
| 7 | 1713 | F2-3 vs. S2-3 | F2-3 up | + | response to oxidative stress                       | GO:0006979 | Signaling and response | Stress        | P | 460  | 44  | 21.85  | 2.01  | 3.37E-05 | 1.05E-03 |
| 7 | 1714 | F2-3 vs. S2-3 | F2-3 up | + | response to radiation                              | GO:0009314 | Signaling and response | Stress        | P | 738  | 77  | 35.05  | 2.2   | 1.21E-09 | 1.09E-07 |
| 7 | 1715 | F2-3 vs. S2-3 | F2-3 up | + | response to reactive oxygen species                | GO:0000302 | Signaling and response | Stress        | P | 160  | 21  | 7.6    | 2.76  | 7.79E-05 | 2.16E-03 |
| 7 | 1716 | F2-3 vs. S2-3 | F2-3 up | + | response to salt stress                            | GO:0009651 | Signaling and response | Stress        | P | 447  | 38  | 21.23  | 1.79  | 1.25E-03 | 2.37E-02 |
| 7 | 1717 | F2-3 vs. S2-3 | F2-3 up | + | response to starvation                             | GO:0042594 | Signaling and response | Stress        | P | 195  | 21  | 9.26   | 2.27  | 1.36E-03 | 2.56E-02 |
| 7 | 1718 | F2-3 vs. S2-3 | F2-3 up | + | response to stress                                 | GO:0006950 | Signaling and response | Stress        | P | 3106 | 268 | 147.51 | 1.82  | 8.59E-21 | 3.21E-18 |
| 7 | 1719 | F2-3 vs. S2-3 | F2-3 up | + | response to water deprivation                      | GO:0009414 | Signaling and response | Stress        | P | 356  | 42  | 16.91  | 2.48  | 5.52E-07 | 2.73E-05 |
| 7 | 1720 | F2-3 vs. S2-3 | F2-3 up | + | response to wounding                               | GO:0009611 | Signaling and response | Stress        | P | 227  | 38  | 10.78  | 3.52  | 3.52E-10 | 3.35E-08 |
| 7 | 1721 | F2-3 vs. S2-3 | F2-3 up | + | vitamin biosynthetic process                       | GO:0009110 | Signaling and response | Stress        | P | 59   | 10  | 2.8    | 3.57  | 1.05E-03 | 2.07E-02 |
| 7 | 1722 | F2-3 vs. S2-3 | F2-3 up | + | vitamin metabolic process                          | GO:0006766 | Signaling and response | Stress        | P | 71   | 13  | 3.37   | 3.86  | 1.01E-04 | 2.73E-03 |
| 7 | 1723 | F2-3 vs. S2-3 | F2-3 up | + | water-soluble vitamin biosynthetic process         | GO:0042364 | Signaling and response | Stress        | P | 49   | 9   | 2.33   | 3.87  | 1.13E-03 | 2.20E-02 |
| 7 | 1724 | F2-3 vs. S2-3 | F2-3 up | + | water-soluble vitamin metabolic process            | GO:0006767 | Signaling and response | Stress        | P | 61   | 12  | 2.9    | 4.14  | 1.02E-04 | 2.74E-03 |
| 7 | 1725 | F2-3 vs. S2-3 | F2-3 up | - | DNA-binding transcription factor activity          | GO:0003700 | Regulation             | Transcription | F | 1650 | 43  | 78.36  | 0.55  | 1.74E-05 | 8.61E-04 |
| 7 | 1726 | F2-3 vs. S2-3 | F2-3 up | - | gene expression                                    | GO:0010467 | Regulation             | Transcription | P | 1608 | 44  | 76.36  | 0.58  | 7.11E-05 | 1.99E-03 |
| 7 | 1727 | F2-3 vs. S2-3 | F2-3 up | - | macromolecule modification                         | GO:0043412 | Regulation             | Transcription | P | 2832 | 100 | 134.49 | 0.74  | 1.67E-03 | 3.02E-02 |
| 7 | 1728 | F2-3 vs. S2-3 | F2-3 up | - | regulation of gene expression                      | GO:0010468 | Regulation             | Transcription | P | 2679 | 69  | 127.23 | 0.54  | 1.08E-08 | 8.71E-07 |
| 7 | 1729 | F2-3 vs. S2-3 | F2-3 up | - | regulation of nucleic acid-templated transcription | GO:1903506 | Regulation             | Transcription | P | 2184 | 52  | 103.72 | 0.5   | 1.69E-08 | 1.28E-06 |
| 7 | 1730 | F2-3 vs. S2-3 | F2-3 up | - | regulation of RNA biosynthetic process             | GO:2001141 | Regulation             | Transcription | P | 2186 | 52  | 103.81 | 0.5   | 1.70E-08 | 1.27E-06 |
| 7 | 1731 | F2-3 vs. S2-3 | F2-3 up | - | regulation of transcription, DNA-templated         | GO:0006355 | Regulation             | Transcription | P | 2184 | 52  | 103.72 | 0.5   | 1.69E-08 | 1.30E-06 |
| 7 | 1732 | F2-3 vs. S2-3 | F2-3 up | - | RNA modification                                   | GO:0009451 | Regulation             | Transcription | P | 283  | 3   | 13.44  | 0.22  | 1.50E-03 | 2.79E-02 |
| 7 | 1733 | F2-3 vs. S2-3 | F2-3 up | - | sequence-specific DNA binding                      | GO:0043565 | Regulation             | Transcription | F | 1029 | 27  | 48.87  | 0.55  | 8.87E-04 | 2.55E-02 |
| 7 | 1734 | F2-3 vs. S2-3 | F2-3 up | - | transcription regulator activity                   | GO:0140110 | Regulation             | Transcription | F | 1818 | 43  | 86.34  | 0.5   | 2.58E-07 | 2.03E-05 |
| 7 | 1735 | F2-3 vs. S2-3 | F2-3 up | + | RNA binding                                        | GO:0003723 | Regulation             | Transcription | F | 1569 | 106 | 74.51  | 1.42  | 5.38E-04 | 1.66E-02 |
| 7 | 1736 | F2-3 vs. S2-3 | F2-3 up | - | large ribosomal subunit                            | GO:0015934 | Regulation             | Translation   | C | 180  | 0   | 8.55   | <     | 4.36E-04 | 6.67E-03 |
| 7 | 1737 | F2-3 vs. S2-3 | F2-3 up | - | regulation of RNA metabolic process                | GO:0051252 | Regulation             | Translation   | P | 2285 | 59  | 108.52 | 0.54  | 1.93E-07 | 1.05E-05 |
| 7 | 1738 | F2-3 vs. S2-3 | F2-3 up | - | ribonucleoprotein complex                          | GO:1990904 | Regulation             | Translation   | C | 677  | 8   | 32.15  | 0.25  | 9.54E-07 | 2.68E-05 |
| 7 | 1739 | F2-3 vs. S2-3 | F2-3 up | - | ribosomal subunit                                  | GO:0044391 | Regulation             | Translation   | C | 316  | 3   | 15.01  | 0.2   | 5.71E-04 | 8.61E-03 |
| 7 | 1740 | F2-3 vs. S2-3 | F2-3 up | - | RNA processing                                     | GO:0006396 | Regulation             | Translation   | P | 787  | 19  | 37.38  | 0.51  | 1.43E-03 | 2.68E-02 |
| 7 | 1741 | F2-3 vs. S2-3 | F2-3 up | - | structural constituent of ribosome                 | GO:0003735 | Regulation             | Translation   | F | 325  | 3   | 15.43  | 0.19  | 4.08E-04 | 1.28E-02 |
| 7 | 1742 | F2-3 vs. S2-3 | F2-3 up | + | mRNA binding                                       | GO:0003729 | Regulation             | Translation   | F | 1005 | 88  | 47.73  | 1.84  | 2.34E-07 | 1.93E-05 |
| 7 | 1743 | F2-3 vs. S2-3 | F2-3 up | + | ribonucleotide binding                             | GO:0032553 | Regulation             | Translation   | F | 826  | 61  | 39.23  | 1.56  | 1.31E-03 | 3.58E-02 |
| 7 | 1744 | F2-3 vs. S2-3 | F2-3 up | + | active ion transmembrane transporter activity      | GO:0022853 | Metabolism             | Transporters  | F | 215  | 37  | 10.21  | 3.62  | 3.04E-10 | 4.66E-08 |
| 7 | 1745 | F2-3 vs. S2-3 | F2-3 up | + | active transmembrane transporter activity          | GO:0022804 | Metabolism             | Transporters  | F | 482  | 66  | 22.89  | 2.88  | 5.54E-13 | 1.62E-10 |
| 7 | 1746 | F2-3 vs. S2-3 | F2-3 up | + | amino acid transmembrane transport                 | GO:0003333 | Metabolism             | Transporters  | P | 27   | 7   | 1.28   | 5.46  | 7.10E-04 | 1.50E-02 |
| 7 | 1747 | F2-3 vs. S2-3 | F2-3 up | + | amino acid transmembrane transporter activity      | GO:0015171 | Metabolism             | Transporters  | F | 78   | 13  | 3.7    | 3.51  | 2.30E-04 | 7.95E-03 |
| 7 | 1748 | F2-3 vs. S2-3 | F2-3 up | + | amino acid transport                               | GO:0006865 | Metabolism             | Transporters  | P | 48   | 11  | 2.28   | 4.83  | 6.01E-05 | 1.76E-03 |
| 7 | 1749 | F2-3 vs. S2-3 | F2-3 up | + | anion transmembrane transport                      | GO:0098656 | Metabolism             | Transporters  | P | 107  | 16  | 5.08   | 3.15  | 1.43E-04 | 3.71E-03 |
| 7 | 1750 | F2-3 vs. S2-3 | F2-3 up | + | anion transmembrane transporter activity           | GO:0008509 | Metabolism             | Transporters  | F | 336  | 39  | 15.96  | 2.44  | 1.89E-06 | 1.17E-04 |
| 7 | 1751 | F2-3 vs. S2-3 | F2-3 up | + | anion transport                                    | GO:0006820 | Metabolism             | Transporters  | P | 283  | 32  | 13.44  | 2.38  | 2.61E-05 | 8.48E-04 |
| 7 | 1752 | F2-3 vs. S2-3 | F2-3 up | + | antiporter activity                                | GO:0015297 | Metabolism             | Transporters  | F | 197  | 23  | 9.36   | 2.46  | 2.15E-04 | 7.58E-03 |

|   |      |               |         |   |                                                                   |            |            |               |   |      |     |        |      |          |          |
|---|------|---------------|---------|---|-------------------------------------------------------------------|------------|------------|---------------|---|------|-----|--------|------|----------|----------|
| 7 | 1753 | F2-3 vs. S2-3 | F2-3 up | + | ATPase-coupled cation transmembrane transporter activity          | GO:0019829 | Metabolism | Transporters  | F | 61   | 18  | 2.9    | 6.21 | 1.16E-08 | 1.49E-06 |
| 7 | 1754 | F2-3 vs. S2-3 | F2-3 up | + | ATPase-coupled ion transmembrane transporter activity             | GO:0042625 | Metabolism | Transporters  | F | 76   | 19  | 3.61   | 5.26 | 4.41E-08 | 4.72E-06 |
| 7 | 1755 | F2-3 vs. S2-3 | F2-3 up | + | ATPase-coupled transmembrane transporter activity                 | GO:0042626 | Metabolism | Transporters  | F | 190  | 31  | 9.02   | 3.44 | 2.45E-08 | 2.92E-06 |
| 7 | 1756 | F2-3 vs. S2-3 | F2-3 up | + | carbohydrate transmembrane transporter                            | GO:0015144 | Metabolism | Transporters  | F | 95   | 18  | 4.51   | 3.99 | 3.29E-06 | 1.86E-04 |
| 7 | 1757 | F2-3 vs. S2-3 | F2-3 up | + | carbohydrate transport                                            | GO:0008643 | Metabolism | Transporters  | P | 60   | 13  | 2.85   | 4.56 | 2.20E-05 | 7.30E-04 |
| 7 | 1758 | F2-3 vs. S2-3 | F2-3 up | + | carboxylic acid transmembrane transport                           | GO:1905039 | Metabolism | Transporters  | P | 55   | 10  | 2.61   | 3.83 | 6.54E-04 | 1.41E-02 |
| 7 | 1759 | F2-3 vs. S2-3 | F2-3 up | + | carboxylic acid transmembrane transporter                         | GO:0046943 | Metabolism | Transporters  | F | 122  | 18  | 5.79   | 3.11 | 6.56E-05 | 2.89E-03 |
| 7 | 1760 | F2-3 vs. S2-3 | F2-3 up | + | carboxylic acid transport                                         | GO:0046942 | Metabolism | Transporters  | P | 114  | 15  | 5.41   | 2.77 | 7.65E-04 | 1.59E-02 |
| 7 | 1761 | F2-3 vs. S2-3 | F2-3 up | + | cation transmembrane transport                                    | GO:0098655 | Metabolism | Transporters  | P | 229  | 33  | 10.88  | 3.03 | 1.22E-07 | 7.24E-06 |
| 7 | 1762 | F2-3 vs. S2-3 | F2-3 up | + | cation transmembrane transporter activity                         | GO:0008324 | Metabolism | Transporters  | F | 414  | 49  | 19.66  | 2.49 | 4.76E-08 | 4.93E-06 |
| 7 | 1763 | F2-3 vs. S2-3 | F2-3 up | + | cation transport                                                  | GO:0006812 | Metabolism | Transporters  | P | 412  | 47  | 19.57  | 2.4  | 3.20E-07 | 1.70E-05 |
| 7 | 1764 | F2-3 vs. S2-3 | F2-3 up | + | cytoplasmic vesicle                                               | GO:0031410 | Metabolism | Transporters  | C | 720  | 63  | 34.19  | 1.84 | 1.11E-05 | 2.15E-04 |
| 7 | 1765 | F2-3 vs. S2-3 | F2-3 up | + | endosome                                                          | GO:0005768 | Metabolism | Transporters  | C | 411  | 35  | 19.52  | 1.79 | 1.76E-03 | 2.38E-02 |
| 7 | 1766 | F2-3 vs. S2-3 | F2-3 up | + | export across plasma membrane                                     | GO:0140115 | Metabolism | Transporters  | P | 15   | 7   | 0.71   | 9.83 | 3.62E-05 | 1.12E-03 |
| 7 | 1767 | F2-3 vs. S2-3 | F2-3 up | + | export from cell                                                  | GO:0140352 | Metabolism | Transporters  | P | 98   | 14  | 4.65   | 3.01 | 5.48E-04 | 1.21E-02 |
| 7 | 1768 | F2-3 vs. S2-3 | F2-3 up | + | inorganic cation transmembrane transport                          | GO:0098662 | Metabolism | Transporters  | P | 223  | 32  | 10.59  | 3.02 | 2.06E-07 | 1.11E-05 |
| 7 | 1769 | F2-3 vs. S2-3 | F2-3 up | + | inorganic cation transmembrane transporter activity               | GO:0022890 | Metabolism | Transporters  | F | 382  | 44  | 18.14  | 2.43 | 4.20E-07 | 3.21E-05 |
| 7 | 1770 | F2-3 vs. S2-3 | F2-3 up | + | inorganic ion transmembrane transport                             | GO:0098660 | Metabolism | Transporters  | P | 244  | 36  | 11.59  | 3.11 | 1.94E-08 | 1.42E-06 |
| 7 | 1771 | F2-3 vs. S2-3 | F2-3 up | + | inorganic molecular entity transmembrane transporter activity     | GO:0015318 | Metabolism | Transporters  | F | 664  | 77  | 31.53  | 2.44 | 1.85E-11 | 3.97E-09 |
| 7 | 1772 | F2-3 vs. S2-3 | F2-3 up | + | ion transmembrane transport                                       | GO:0034220 | Metabolism | Transporters  | P | 330  | 48  | 15.67  | 3.06 | 1.35E-10 | 1.55E-08 |
| 7 | 1773 | F2-3 vs. S2-3 | F2-3 up | + | ion transmembrane transporter activity                            | GO:0015075 | Metabolism | Transporters  | F | 718  | 80  | 34.1   | 2.35 | 3.41E-11 | 6.46E-09 |
| 7 | 1774 | F2-3 vs. S2-3 | F2-3 up | + | ion transmembrane transporter activity, phosphorylative mechanism | GO:0015662 | Metabolism | Transporters  | F | 50   | 11  | 2.37   | 4.63 | 8.27E-05 | 3.41E-03 |
| 7 | 1775 | F2-3 vs. S2-3 | F2-3 up | + | ion transport                                                     | GO:0006811 | Metabolism | Transporters  | P | 673  | 75  | 31.96  | 2.35 | 1.65E-10 | 1.79E-08 |
| 7 | 1776 | F2-3 vs. S2-3 | F2-3 up | + | monovalent inorganic cation transmembrane transporter activity    | GO:0015077 | Metabolism | Transporters  | F | 220  | 32  | 10.45  | 3.06 | 1.57E-07 | 1.40E-05 |
| 7 | 1777 | F2-3 vs. S2-3 | F2-3 up | + | monovalent inorganic cation transport                             | GO:0015672 | Metabolism | Transporters  | P | 170  | 29  | 8.07   | 3.59 | 2.92E-08 | 2.11E-06 |
| 7 | 1778 | F2-3 vs. S2-3 | F2-3 up | + | organic acid transmembrane transport                              | GO:1903825 | Metabolism | Transporters  | P | 57   | 10  | 2.71   | 3.69 | 8.34E-04 | 1.72E-02 |
| 7 | 1779 | F2-3 vs. S2-3 | F2-3 up | + | organic acid transmembrane transporter activity                   | GO:0005342 | Metabolism | Transporters  | F | 122  | 18  | 5.79   | 3.11 | 6.56E-05 | 2.85E-03 |
| 7 | 1780 | F2-3 vs. S2-3 | F2-3 up | + | organic acid transport                                            | GO:0015849 | Metabolism | Transporters  | P | 116  | 15  | 5.51   | 2.72 | 8.98E-04 | 1.82E-02 |
| 7 | 1781 | F2-3 vs. S2-3 | F2-3 up | + | organic anion transmembrane transporter                           | GO:0008514 | Metabolism | Transporters  | F | 200  | 28  | 9.5    | 2.95 | 1.79E-06 | 1.15E-04 |
| 7 | 1782 | F2-3 vs. S2-3 | F2-3 up | + | organic anion transport                                           | GO:0015711 | Metabolism | Transporters  | P | 164  | 21  | 7.79   | 2.7  | 1.07E-04 | 2.85E-03 |
| 7 | 1783 | F2-3 vs. S2-3 | F2-3 up | + | plasmodesma                                                       | GO:0009506 | Metabolism | Transporters  | C | 944  | 78  | 44.83  | 1.74 | 7.60E-06 | 1.72E-04 |
| 7 | 1784 | F2-3 vs. S2-3 | F2-3 up | + | primary active transmembrane transporter                          | GO:0015399 | Metabolism | Transporters  | F | 213  | 32  | 10.12  | 3.16 | 8.11E-08 | 7.90E-06 |
| 7 | 1785 | F2-3 vs. S2-3 | F2-3 up | + | proton transmembrane transporter activity                         | GO:0015078 | Metabolism | Transporters  | F | 166  | 29  | 7.88   | 3.68 | 1.84E-08 | 2.28E-06 |
| 7 | 1786 | F2-3 vs. S2-3 | F2-3 up | + | secondary active transmembrane transporter activity               | GO:0015291 | Metabolism | Transporters  | F | 266  | 33  | 12.63  | 2.61 | 3.37E-06 | 1.87E-04 |
| 7 | 1787 | F2-3 vs. S2-3 | F2-3 up | + | secretory vesicle                                                 | GO:0099503 | Metabolism | Transporters  | C | 170  | 24  | 8.07   | 2.97 | 8.42E-06 | 1.69E-04 |
| 7 | 1788 | F2-3 vs. S2-3 | F2-3 up | + | sugar transmembrane transporter activity                          | GO:0051119 | Metabolism | Transporters  | F | 39   | 10  | 1.85   | 5.4  | 5.78E-05 | 2.62E-03 |
| 7 | 1789 | F2-3 vs. S2-3 | F2-3 up | + | trans-Golgi network                                               | GO:0005802 | Metabolism | Transporters  | C | 302  | 35  | 14.34  | 2.44 | 7.51E-06 | 1.74E-04 |
| 7 | 1790 | F2-3 vs. S2-3 | F2-3 up | + | transmembrane transport                                           | GO:0055085 | Metabolism | Transporters  | P | 859  | 96  | 40.79  | 2.35 | 2.93E-13 | 5.16E-11 |
| 7 | 1791 | F2-3 vs. S2-3 | F2-3 up | + | transmembrane transporter activity                                | GO:0022857 | Metabolism | Transporters  | F | 1242 | 139 | 58.98  | 2.36 | 6.09E-19 | 4.89E-16 |
| 7 | 1792 | F2-3 vs. S2-3 | F2-3 up | + | transport                                                         | GO:0006810 | Metabolism | Transporters  | P | 2261 | 177 | 107.38 | 1.65 | 2.93E-10 | 2.92E-08 |
| 7 | 1793 | F2-3 vs. S2-3 | F2-3 up | + | transporter activity                                              | GO:0005215 | Metabolism | Transporters  | F | 1287 | 141 | 61.12  | 2.31 | 2.07E-18 | 1.33E-15 |
| 7 | 1794 | F2-3 vs. S2-3 | F2-3 up | + | vesicle                                                           | GO:0031982 | Metabolism | Transporters  | C | 817  | 70  | 38.8   | 1.8  | 7.79E-06 | 1.59E-04 |
| 7 | 1795 | F2-3 vs. S2-3 | S2-3 up | + | cytochrome complex                                                | GO:0070069 | Metabolism | Bioenergetics | C | 30   | 6   | 1.23   | 4.87 | 2.61E-03 | 2.62E-02 |
| 7 | 1796 | F2-3 vs. S2-3 | S2-3 up | + | inner mitochondrial membrane protein complex                      | GO:0098800 | Metabolism | Bioenergetics | C | 177  | 20  | 7.26   | 2.75 | 1.10E-04 | 1.69E-03 |
| 7 | 1797 | F2-3 vs. S2-3 | S2-3 up | + | mitochondrial electron transport, ubiquinol to cytochrome c       | GO:0006122 | Metabolism | Bioenergetics | P | 14   | 5   | 0.57   | 8.7  | 6.91E-04 | 3.30E-02 |
| 7 | 1798 | F2-3 vs. S2-3 | S2-3 up | + | mitochondrial envelope                                            | GO:0005740 | Metabolism | Bioenergetics | C | 317  | 27  | 13.01  | 2.08 | 6.90E-04 | 8.16E-03 |
| 7 | 1799 | F2-3 vs. S2-3 | S2-3 up | + | mitochondrial inner membrane                                      | GO:0005743 | Metabolism | Bioenergetics | C | 245  | 21  | 10.05  | 2.09 | 2.37E-03 | 2.41E-02 |
| 7 | 1800 | F2-3 vs. S2-3 | S2-3 up | + | mitochondrial matrix                                              | GO:0005759 | Metabolism | Bioenergetics | C | 135  | 16  | 5.54   | 2.89 | 3.20E-04 | 4.32E-03 |
| 7 | 1801 | F2-3 vs. S2-3 | S2-3 up | + | mitochondrial membrane                                            | GO:0031966 | Metabolism | Bioenergetics | C | 297  | 26  | 12.19  | 2.13 | 7.23E-04 | 8.45E-03 |
| 7 | 1802 | F2-3 vs. S2-3 | S2-3 up | + | mitochondrial protein complex                                     | GO:0098798 | Metabolism | Bioenergetics | C | 259  | 33  | 10.63  | 3.11 | 6.38E-08 | 1.90E-06 |
| 7 | 1803 | F2-3 vs. S2-3 | S2-3 up | + | mitochondrial respirasome                                         | GO:0005746 | Metabolism | Bioenergetics | C | 111  | 16  | 4.55   | 3.51 | 4.11E-05 | 7.01E-04 |
| 7 | 1804 | F2-3 vs. S2-3 | S2-3 up | + | mitochondrial respiratory chain complex I                         | GO:0005747 | Metabolism | Bioenergetics | C | 70   | 9   | 2.87   | 3.13 | 3.86E-03 | 3.56E-02 |
| 7 | 1805 | F2-3 vs. S2-3 | S2-3 up | + | mitochondrial respiratory chain complex III                       | GO:0005750 | Metabolism | Bioenergetics | C | 19   | 6   | 0.78   | 7.7  | 3.44E-04 | 4.53E-03 |

|   |      |               |         |   |                                                    |            |             |               |   |       |      |         |       |          |          |
|---|------|---------------|---------|---|----------------------------------------------------|------------|-------------|---------------|---|-------|------|---------|-------|----------|----------|
| 7 | 1806 | F2-3 vs. S2-3 | S2-3 up | + | NADH dehydrogenase complex                         | GO:0030964 | Metabolism  | Bioenergetics | C | 77    | 10   | 3.16    | 3.16  | 2.23E-03 | 2.34E-02 |
| 7 | 1807 | F2-3 vs. S2-3 | S2-3 up | + | oxidoreductase complex                             | GO:1990204 | Metabolism  | Bioenergetics | C | 161   | 19   | 6.61    | 2.88  | 9.67E-05 | 1.50E-03 |
| 7 | 1808 | F2-3 vs. S2-3 | S2-3 up | + | primary metabolic process                          | GO:0044238 | Metabolism  | Bioenergetics | P | 7219  | 429  | 296.23  | 1.45  | 2.63E-17 | 4.92E-15 |
| 7 | 1809 | F2-3 vs. S2-3 | S2-3 up | + | respirasome                                        | GO:0070469 | Metabolism  | Bioenergetics | C | 116   | 16   | 4.76    | 3.36  | 6.59E-05 | 1.07E-03 |
| 7 | 1810 | F2-3 vs. S2-3 | S2-3 up | + | respiratory chain complex                          | GO:0098803 | Metabolism  | Bioenergetics | C | 109   | 16   | 4.47    | 3.58  | 3.37E-05 | 5.85E-04 |
| 7 | 1811 | F2-3 vs. S2-3 | S2-3 up | + | respiratory chain complex I                        | GO:0045271 | Metabolism  | Bioenergetics | C | 73    | 9    | 3       | 3     | 4.95E-03 | 4.37E-02 |
| 7 | 1812 | F2-3 vs. S2-3 | S2-3 up | + | respiratory chain complex III                      | GO:0045275 | Metabolism  | Bioenergetics | C | 19    | 6    | 0.78    | 7.7   | 3.44E-04 | 4.42E-03 |
| 7 | 1813 | F2-3 vs. S2-3 | S2-3 up | + | protein-containing complex                         | GO:0032991 | Metabolism  | Catabolism    | C | 2958  | 315  | 121.38  | 2.6   | 2.92E-54 | 5.07E-52 |
| 7 | 1814 | F2-3 vs. S2-3 | S2-3 up | + | cell cycle                                         | GO:0007049 | Development | Cell division | P | 458   | 49   | 18.79   | 2.61  | 9.87E-09 | 1.09E-06 |
| 7 | 1815 | F2-3 vs. S2-3 | S2-3 up | + | cell cycle process                                 | GO:0022402 | Development | Cell division | P | 421   | 49   | 17.28   | 2.84  | 7.10E-10 | 9.23E-08 |
| 7 | 1816 | F2-3 vs. S2-3 | S2-3 up | + | cell division                                      | GO:0051301 | Development | Cell division | P | 211   | 22   | 8.66    | 2.54  | 2.31E-04 | 1.29E-02 |
| 7 | 1817 | F2-3 vs. S2-3 | S2-3 up | + | chromosome                                         | GO:0005694 | Development | Cell division | C | 545   | 40   | 22.36   | 1.79  | 7.84E-04 | 9.07E-03 |
| 7 | 1818 | F2-3 vs. S2-3 | S2-3 up | + | cyclin-dependent protein kinase holoenzyme complex | GO:0000307 | Development | Cell division | C |       |      |         | 3.54  | 1.85E-03 | 1.98E-02 |
| 7 | 1819 | F2-3 vs. S2-3 | S2-3 up | + | cytokinesis                                        | GO:0000910 | Development | Cell division | P | 62    | 9    | 2.54    |       |          |          |
| 7 | 1820 | F2-3 vs. S2-3 | S2-3 up | + | cytokinesis by cell plate formation                | GO:0000911 | Development | Cell division | P | 102   | 15   | 4.19    | 3.58  | 5.77E-05 | 3.56E-03 |
| 7 | 1821 | F2-3 vs. S2-3 | S2-3 up | + | G1/S transition of mitotic cell cycle              | GO:0000082 | Development | Cell division | P | 68    | 14   | 2.79    | 5.02  | 3.63E-06 | 2.78E-04 |
| 7 | 1822 | F2-3 vs. S2-3 | S2-3 up | + | kinetochore                                        | GO:0000776 | Development | Cell division | P | 8     | 4    | 0.33    | 12.18 | 9.22E-04 | 4.18E-02 |
| 7 | 1823 | F2-3 vs. S2-3 | S2-3 up | + | mitotic cell cycle                                 | GO:0000278 | Development | Cell division | C | 24    | 5    | 0.98    | 5.08  | 5.09E-03 | 4.45E-02 |
| 7 | 1824 | F2-3 vs. S2-3 | S2-3 up | + | mitotic cell cycle process                         | GO:0000278 | Development | Cell division | P | 244   | 26   | 10.01   | 2.6   | 2.79E-05 | 1.77E-03 |
| 7 | 1825 | F2-3 vs. S2-3 | S2-3 up | + | mitotic spindle                                    | GO:1903047 | Development | Cell division | P | 203   | 25   | 8.33    | 3     | 4.22E-06 | 3.19E-04 |
| 7 | 1826 | F2-3 vs. S2-3 | S2-3 up | + | nuclear division                                   | GO:0072686 | Development | Cell division | C | 20    | 6    | 0.82    | 7.31  | 4.32E-04 | 5.49E-03 |
| 7 | 1827 | F2-3 vs. S2-3 | S2-3 up | + | nucleic acid metabolic process                     | GO:0000280 | Development | Cell division | P | 163   | 19   | 6.69    | 2.84  | 1.12E-04 | 6.50E-03 |
| 7 | 1828 | F2-3 vs. S2-3 | S2-3 up | + | nucleobase-containing compound metabolic process   | GO:0090304 | Development | Cell division | P | 1705  | 131  | 69.96   | 1.87  | 3.15E-11 | 4.28E-09 |
| 7 | 1829 | F2-3 vs. S2-3 | S2-3 up | + | preprophase band                                   | GO:0006139 | Development | Cell division | P |       |      |         | 1.7   | 1.49E-09 | 1.82E-07 |
| 7 | 1830 | F2-3 vs. S2-3 | S2-3 up | + | regulation of cell cycle                           | GO:0009574 | Development | Cell division | C | 2093  | 146  | 85.89   |       |          |          |
| 7 | 1831 | F2-3 vs. S2-3 | S2-3 up | + | regulation of cell division                        | GO:0051726 | Development | Cell division | C | 19    | 6    | 0.78    | 7.7   | 3.44E-04 | 4.59E-03 |
| 7 | 1832 | F2-3 vs. S2-3 | S2-3 up | + | regulation of mitotic cell cycle                   | GO:0051302 | Development | Cell division | P | 241   | 26   | 9.89    | 2.63  | 2.30E-05 | 1.49E-03 |
| 7 | 1833 | F2-3 vs. S2-3 | S2-3 up | + | reproduction                                       | GO:0007346 | Development | Cell division | P | 63    | 10   | 2.59    | 3.87  | 5.67E-04 | 2.75E-02 |
| 7 | 1834 | F2-3 vs. S2-3 | S2-3 up | + | reproductive process                               | GO:0000003 | Development | Cell division | P | 89    | 13   | 3.65    | 3.56  | 1.87E-04 | 1.07E-02 |
| 7 | 1835 | F2-3 vs. S2-3 | S2-3 up | + | RNA metabolic process                              | GO:0000003 | Development | Cell division | P | 1742  | 111  | 71.48   | 1.55  | 1.06E-05 | 7.53E-04 |
| 7 | 1836 | F2-3 vs. S2-3 | S2-3 up | + | spindle                                            | GO:0022414 | Development | Cell division | P | 1732  | 110  | 71.07   | 1.55  | 1.33E-05 | 9.27E-04 |
| 7 | 1837 | F2-3 vs. S2-3 | S2-3 up | + | spindle microtubule                                | GO:0016070 | Development | Cell division | P | 1294  | 101  | 53.1    | 1.9   | 4.73E-09 | 5.65E-07 |
| 7 | 1838 | F2-3 vs. S2-3 | S2-3 up | + | adaxial/abaxial pattern specification              | GO:0005819 | Development | Cell division | C | 75    | 17   | 3.08    | 5.52  | 1.03E-07 | 2.89E-06 |
| 7 | 1839 | F2-3 vs. S2-3 | S2-3 up | + | anatomical structure development                   | GO:0005876 | Development | Cell division | C | 19    | 6    | 0.78    | 7.7   | 3.44E-04 | 4.48E-03 |
| 7 | 1840 | F2-3 vs. S2-3 | S2-3 up | + | anatomical structure morphogenesis                 | GO:0009955 | Development | Development   | P | 38    | 10   | 1.56    | 6.41  | 1.45E-05 | 9.98E-04 |
| 7 | 1841 | F2-3 vs. S2-3 | S2-3 up | + | bounding membrane of organelle                     | GO:0048856 | Development | Development   | P | 2842  | 175  | 116.62  | 1.5   | 1.41E-07 | 1.40E-05 |
| 7 | 1842 | F2-3 vs. S2-3 | S2-3 up | + | carpel development                                 | GO:0009653 | Development | Development   | P | 896   | 61   | 36.77   | 1.66  | 2.53E-04 | 1.37E-02 |
| 7 | 1843 | F2-3 vs. S2-3 | S2-3 up | + | cell cortex                                        | GO:0098588 | Development | Development   | C | 923   | 65   | 37.87   | 1.72  | 5.77E-05 | 9.54E-04 |
| 7 | 1844 | F2-3 vs. S2-3 | S2-3 up | + | cell junction                                      | GO:0048440 | Development | Development   | P | 78    | 11   | 3.2     | 3.44  | 7.46E-04 | 3.54E-02 |
| 7 | 1845 | F2-3 vs. S2-3 | S2-3 up | + | cell periphery                                     | GO:0005938 | Development | Development   | C | 115   | 14   | 4.72    | 2.97  | 5.82E-04 | 7.29E-03 |
| 7 | 1846 | F2-3 vs. S2-3 | S2-3 up | + | cell wall                                          | GO:0030054 | Development | Development   | C | 944   | 100  | 38.74   | 2.58  | 2.26E-16 | 1.07E-14 |
| 7 | 1847 | F2-3 vs. S2-3 | S2-3 up | + | cell-cell junction                                 | GO:0071944 | Development | Development   | C | 4012  | 242  | 164.63  | 1.47  | 1.47E-09 | 5.66E-08 |
| 7 | 1848 | F2-3 vs. S2-3 | S2-3 up | + | cellular anatomical entity                         | GO:0005618 | Development | Development   | C | 565   | 48   | 23.18   | 2.07  | 7.49E-06 | 1.50E-04 |
| 7 | 1849 | F2-3 vs. S2-3 | S2-3 up | + | cellular component assembly                        | GO:0005911 | Development | Development   | C | 944   | 100  | 38.74   | 2.58  | 2.26E-16 | 1.24E-14 |
| 7 | 1850 | F2-3 vs. S2-3 | S2-3 up | + | cellular component biogenesis                      | GO:0110165 | Development | Development   | C | 24430 | 1061 | 1002.47 | 1.06  | 2.84E-09 | 1.06E-07 |
| 7 | 1851 | F2-3 vs. S2-3 | S2-3 up | + | cellular component organization                    | GO:0022607 | Development | Development   | P | 838   | 102  | 34.39   | 2.97  | 1.65E-20 | 4.12E-18 |
| 7 | 1852 | F2-3 vs. S2-3 | S2-3 up | + | cellular component organization or biogenesis      | GO:0044085 | Development | Development   | P | 1325  | 144  | 54.37   | 2.65  | 2.76E-24 | 8.70E-22 |
| 7 | 1853 | F2-3 vs. S2-3 | S2-3 up | + | cellular localization                              | GO:0016043 | Development | Development   | P | 2405  | 190  | 98.69   | 1.93  | 3.63E-17 | 6.58E-15 |
| 7 | 1854 | F2-3 vs. S2-3 | S2-3 up | + | cellular process                                   | GO:0071840 | Development | Development   | P | 2813  | 228  | 115.43  | 1.98  | 4.05E-22 | 1.15E-19 |
| 7 | 1855 | F2-3 vs. S2-3 | S2-3 up | + | cellular_component                                 | GO:0051641 | Development | Development   | P | 934   | 61   | 38.33   | 1.59  | 6.45E-04 | 3.11E-02 |
| 7 | 1856 | F2-3 vs. S2-3 | S2-3 up | + | cortical cytoskeleton                              | GO:0009987 | Development | Development   | P | 12008 | 667  | 492.74  | 1.35  | 1.91E-24 | 6.36E-22 |
| 7 | 1857 | F2-3 vs. S2-3 | S2-3 up | + | cortical microtubule                               | GO:0005575 | Development | Development   | C | 25545 | 1079 | 1048.22 | 1.03  | 1.58E-04 | 2.17E-03 |
| 7 | 1858 | F2-3 vs. S2-3 | S2-3 up | + | cortical microtubule cytoskeleton                  | GO:0030863 | Development | Development   | C | 47    | 8    | 1.93    | 4.15  | 1.33E-03 | 1.48E-02 |
| 7 | 1859 | F2-3 vs. S2-3 | S2-3 up | + | cytoplasm                                          | GO:0055028 | Development | Development   | C | 41    | 7    | 1.68    | 4.16  | 2.60E-03 | 2.63E-02 |
| 7 | 1860 | F2-3 vs. S2-3 | S2-3 up | + | cytoplasmic microtubule                            | GO:0030981 | Development | Development   | C | 44    | 8    | 1.81    | 4.43  | 9.15E-04 | 1.05E-02 |
| 7 | 1861 | F2-3 vs. S2-3 | S2-3 up | + | cytoskeleton                                       | GO:0005737 | Development | Development   | C | 14837 | 737  | 608.83  | 1.21  | 3.60E-14 | 1.56E-12 |
| 7 | 1862 | F2-3 vs. S2-3 | S2-3 up | + | cytoskeleton organization                          | GO:0005881 | Development | Development   | C | 48    | 8    | 1.97    | 4.06  | 1.50E-03 | 1.65E-02 |
| 7 | 1863 | F2-3 vs. S2-3 | S2-3 up | + | cytosol                                            | GO:0005856 | Development | Development   | C | 298   | 32   | 12.23   | 2.62  | 4.61E-06 | 9.41E-05 |
| 7 | 1864 | F2-3 vs. S2-3 | S2-3 up | + | developmental process                              | GO:0007010 | Development | Development   | P | 283   | 26   | 11.61   | 2.24  | 3.07E-04 | 1.59E-02 |
| 7 | 1865 | F2-3 vs. S2-3 | S2-3 up | + | developmental process involved in reproduction     | GO:0005829 | Development | Development   | C | 3241  | 304  | 132.99  | 2.29  | 1.95E-41 | 2.54E-39 |
| 7 | 1866 | F2-3 vs. S2-3 | S2-3 up | + |                                                    | GO:0032502 | Development | Development   | P | 2997  | 179  | 122.98  | 1.46  | 7.35E-07 | 6.19E-05 |
| 7 | 1867 | F2-3 vs. S2-3 | S2-3 up | + |                                                    | GO:0003006 | Development | Development   | P | 1437  | 94   | 58.97   | 1.59  | 1.94E-05 | 1.31E-03 |

|   |      |               |         |   |                                                |            |             |             |   |       |     |        |       |          |          |
|---|------|---------------|---------|---|------------------------------------------------|------------|-------------|-------------|---|-------|-----|--------|-------|----------|----------|
| 7 | 1866 | F2-3 vs. S2-3 | S2-3 up | + | embryo development                             | GO:0009790 | Development | Development | P | 566   | 43  | 23.23  | 1.85  | 2.91E-04 | 1.55E-02 |
| 7 | 1867 | F2-3 vs. S2-3 | S2-3 up | + | embryo development ending in seed dormancy     | GO:0009793 | Development | Development | P | 541   | 41  | 22.2   | 1.85  | 3.42E-04 | 1.73E-02 |
| 7 | 1868 | F2-3 vs. S2-3 | S2-3 up | + | endoplasmic reticulum subcompartment           | GO:0098827 | Development | Development | C | 302   | 30  | 12.39  | 2.42  | 2.54E-05 | 4.63E-04 |
| 7 | 1869 | F2-3 vs. S2-3 | S2-3 up | + | envelope                                       | GO:0031975 | Development | Development | C | 1025  | 69  | 42.06  | 1.64  | 1.30E-04 | 1.91E-03 |
| 7 | 1870 | F2-3 vs. S2-3 | S2-3 up | + | ESCRT III complex                              | GO:0000815 | Development | Development | C | 12    | 4   | 0.49   | 8.12  | 2.99E-03 | 2.91E-02 |
| 7 | 1871 | F2-3 vs. S2-3 | S2-3 up | + | external encapsulating structure               | GO:0030312 | Development | Development | C | 567   | 48  | 23.27  | 2.06  | 7.90E-06 | 1.55E-04 |
| 7 | 1872 | F2-3 vs. S2-3 | S2-3 up | + | floral organ development                       | GO:0048437 | Development | Development | P | 245   | 27  | 10.05  | 2.69  | 1.14E-05 | 8.03E-04 |
| 7 | 1873 | F2-3 vs. S2-3 | S2-3 up | + | floral whorl development                       | GO:0048438 | Development | Development | P | 195   | 25  | 8      | 3.12  | 2.21E-06 | 1.74E-04 |
| 7 | 1874 | F2-3 vs. S2-3 | S2-3 up | + | flower development                             | GO:0009908 | Development | Development | P | 356   | 39  | 14.61  | 2.67  | 1.63E-07 | 1.57E-05 |
| 7 | 1875 | F2-3 vs. S2-3 | S2-3 up | + | fruit development                              | GO:0010154 | Development | Development | P | 749   | 57  | 30.73  | 1.85  | 2.92E-05 | 1.84E-03 |
| 7 | 1876 | F2-3 vs. S2-3 | S2-3 up | + | gynoecium development                          | GO:0048467 | Development | Development | P | 91    | 14  | 3.73   | 3.75  | 6.54E-05 | 3.87E-03 |
| 7 | 1877 | F2-3 vs. S2-3 | S2-3 up | + | inflorescence development                      | GO:0010229 | Development | Development | P | 25    | 7   | 1.03   | 6.82  | 2.06E-04 | 1.16E-02 |
| 7 | 1878 | F2-3 vs. S2-3 | S2-3 up | + | intracellular anatomical structure             | GO:0005622 | Development | Development | C | 21464 | 990 | 880.76 | 1.12  | 1.46E-16 | 8.94E-15 |
| 7 | 1879 | F2-3 vs. S2-3 | S2-3 up | + | intracellular membrane-bounded organelle       | GO:0043231 | Development | Development | C | 19384 | 873 | 795.41 | 1.1   | 3.37E-07 | 8.35E-06 |
| 7 | 1880 | F2-3 vs. S2-3 | S2-3 up | + | intracellular non-membrane-bounded organelle   | GO:0043232 | Development | Development | C | 1755  | 235 | 72.02  | 3.26  | 1.58E-54 | 4.10E-52 |
| 7 | 1881 | F2-3 vs. S2-3 | S2-3 up | + | intracellular organelle                        | GO:0043229 | Development | Development | C | 19690 | 915 | 807.97 | 1.13  | 4.96E-13 | 2.06E-11 |
| 7 | 1882 | F2-3 vs. S2-3 | S2-3 up | + | intracellular organelle lumen                  | GO:0070013 | Development | Development | C | 1386  | 135 | 56.87  | 2.37  | 5.86E-19 | 4.70E-17 |
| 7 | 1883 | F2-3 vs. S2-3 | S2-3 up | + | kinetochore microtubule                        | GO:0005828 | Development | Development | C | 6     | 3   | 0.25   | 12.18 | 4.29E-03 | 3.92E-02 |
| 7 | 1884 | F2-3 vs. S2-3 | S2-3 up | + | leaf development                               | GO:0048366 | Development | Development | P | 333   | 29  | 13.66  | 2.12  | 3.22E-04 | 1.66E-02 |
| 7 | 1885 | F2-3 vs. S2-3 | S2-3 up | + | leaf morphogenesis                             | GO:0009965 | Development | Development | P | 94    | 13  | 3.86   | 3.37  | 3.03E-04 | 1.59E-02 |
| 7 | 1886 | F2-3 vs. S2-3 | S2-3 up | + | membrane                                       | GO:0016020 | Development | Development | C | 5493  | 301 | 225.4  | 1.34  | 1.11E-07 | 3.03E-06 |
| 7 | 1887 | F2-3 vs. S2-3 | S2-3 up | + | membrane protein complex                       | GO:0098796 | Development | Development | C | 597   | 48  | 24.5   | 1.96  | 3.27E-05 | 5.77E-04 |
| 7 | 1888 | F2-3 vs. S2-3 | S2-3 up | + | membrane-bounded organelle                     | GO:0043227 | Development | Development | C | 19546 | 878 | 802.06 | 1.09  | 5.74E-07 | 1.36E-05 |
| 7 | 1889 | F2-3 vs. S2-3 | S2-3 up | + | membrane-enclosed lumen                        | GO:0031974 | Development | Development | C | 1386  | 135 | 56.87  | 2.37  | 5.86E-19 | 4.36E-17 |
| 7 | 1890 | F2-3 vs. S2-3 | S2-3 up | + | microtubule                                    | GO:0005874 | Development | Development | C | 145   | 22  | 5.95   | 3.7   | 7.49E-07 | 1.73E-05 |
| 7 | 1891 | F2-3 vs. S2-3 | S2-3 up | + | microtubule associated complex                 | GO:0005875 | Development | Development | C | 67    | 9   | 2.75   | 3.27  | 2.97E-03 | 2.91E-02 |
| 7 | 1892 | F2-3 vs. S2-3 | S2-3 up | + | microtubule cytoskeleton                       | GO:0015630 | Development | Development | C | 216   | 30  | 8.86   | 3.38  | 4.61E-08 | 1.46E-06 |
| 7 | 1893 | F2-3 vs. S2-3 | S2-3 up | + | microtubule cytoskeleton organization          | GO:0000226 | Development | Development | P | 164   | 22  | 6.73   | 3.27  | 4.60E-06 | 3.40E-04 |
| 7 | 1894 | F2-3 vs. S2-3 | S2-3 up | + | microtubule-based process                      | GO:0007017 | Development | Development | P | 228   | 28  | 9.36   | 2.99  | 1.20E-06 | 9.99E-05 |
| 7 | 1895 | F2-3 vs. S2-3 | S2-3 up | + | multicellular organism development             | GO:0007275 | Development | Development | P | 2457  | 153 | 100.82 | 1.52  | 6.21E-07 | 5.38E-05 |
| 7 | 1896 | F2-3 vs. S2-3 | S2-3 up | + | non-membrane-bounded organelle                 | GO:0043228 | Development | Development | C | 1755  | 235 | 72.02  | 3.26  | 1.58E-54 | 3.28E-52 |
| 7 | 1897 | F2-3 vs. S2-3 | S2-3 up | + | nuclear body                                   | GO:0016604 | Development | Development | C | 102   | 13  | 4.19   | 3.11  | 6.12E-04 | 7.59E-03 |
| 7 | 1898 | F2-3 vs. S2-3 | S2-3 up | + | nuclear chromosome                             | GO:0000228 | Development | Development | C | 369   | 27  | 15.14  | 1.78  | 5.84E-03 | 4.95E-02 |
| 7 | 1899 | F2-3 vs. S2-3 | S2-3 up | + | nuclear lumen                                  | GO:0031981 | Development | Development | C | 1222  | 118 | 50.14  | 2.35  | 2.57E-16 | 1.16E-14 |
| 7 | 1900 | F2-3 vs. S2-3 | S2-3 up | + | nuclear outer membrane-endoplasmic reticulum   | GO:0042175 | Development | Development | C |       |     |        | 2.51  | 1.07E-05 | 2.02E-04 |
|   | 1900 |               |         |   | membrane network                               |            | Development | Development |   | 301   | 31  | 12.35  |       |          |          |
| 7 | 1901 | F2-3 vs. S2-3 | S2-3 up | + | nucleoplasm                                    | GO:0005654 | Development | Development | C | 466   | 36  | 19.12  | 1.88  | 6.71E-04 | 8.03E-03 |
| 7 | 1902 | F2-3 vs. S2-3 | S2-3 up | + | nucleus                                        | GO:0005634 | Development | Development | C | 10540 | 531 | 432.5  | 1.23  | 4.96E-09 | 1.78E-07 |
| 7 | 1903 | F2-3 vs. S2-3 | S2-3 up | + | organelle                                      | GO:0043226 | Development | Development | C | 19739 | 915 | 809.98 | 1.13  | 1.23E-12 | 4.91E-11 |
| 7 | 1904 | F2-3 vs. S2-3 | S2-3 up | + | organelle assembly                             | GO:0070925 | Development | Development | P | 193   | 43  | 7.92   | 5.43  | 3.84E-17 | 6.76E-15 |
| 7 | 1905 | F2-3 vs. S2-3 | S2-3 up | + | organelle envelope                             | GO:0031967 | Development | Development | C | 1025  | 69  | 42.06  | 1.64  | 1.30E-04 | 1.88E-03 |
| 7 | 1906 | F2-3 vs. S2-3 | S2-3 up | + | organelle fission                              | GO:0048285 | Development | Development | P | 206   | 21  | 8.45   | 2.48  | 3.80E-04 | 1.91E-02 |
| 7 | 1907 | F2-3 vs. S2-3 | S2-3 up | + | organelle inner membrane                       | GO:0019866 | Development | Development | C | 311   | 24  | 12.76  | 1.88  | 4.50E-03 | 4.04E-02 |
| 7 | 1908 | F2-3 vs. S2-3 | S2-3 up | + | organelle lumen                                | GO:0043233 | Development | Development | C | 1386  | 135 | 56.87  | 2.37  | 5.86E-19 | 4.07E-17 |
| 7 | 1909 | F2-3 vs. S2-3 | S2-3 up | + | organelle membrane                             | GO:0031090 | Development | Development | C | 1458  | 109 | 59.83  | 1.82  | 9.70E-09 | 3.37E-07 |
| 7 | 1910 | F2-3 vs. S2-3 | S2-3 up | + | organelle organization                         | GO:0006996 | Development | Development | P | 1691  | 133 | 69.39  | 1.92  | 6.55E-12 | 9.55E-10 |
| 7 | 1911 | F2-3 vs. S2-3 | S2-3 up | + | pattern specification process                  | GO:0007389 | Development | Development | P | 190   | 27  | 7.8    | 3.46  | 1.42E-07 | 1.39E-05 |
| 7 | 1912 | F2-3 vs. S2-3 | S2-3 up | + | phragmoplast                                   | GO:0009524 | Development | Development | C | 61    | 16  | 2.5    | 6.39  | 4.34E-08 | 1.41E-06 |
| 7 | 1913 | F2-3 vs. S2-3 | S2-3 up | + | phyllome development                           | GO:0048827 | Development | Development | P | 495   | 47  | 20.31  | 2.31  | 5.19E-07 | 4.70E-05 |
| 7 | 1914 | F2-3 vs. S2-3 | S2-3 up | + | plant organ development                        | GO:0099402 | Development | Development | P | 1009  | 77  | 41.4   | 1.86  | 6.57E-07 | 5.61E-05 |
| 7 | 1915 | F2-3 vs. S2-3 | S2-3 up | + | plant ovule development                        | GO:0048481 | Development | Development | P | 55    | 9   | 2.26   | 3.99  | 8.72E-04 | 4.01E-02 |
| 7 | 1916 | F2-3 vs. S2-3 | S2-3 up | + | plant-type ovary development                   | GO:0035670 | Development | Development | P | 57    | 9   | 2.34   | 3.85  | 1.09E-03 | 4.91E-02 |
| 7 | 1917 | F2-3 vs. S2-3 | S2-3 up | + | plasma membrane                                | GO:0005886 | Development | Development | C | 3534  | 209 | 145.02 | 1.44  | 1.22E-07 | 3.26E-06 |
| 7 | 1918 | F2-3 vs. S2-3 | S2-3 up | + | polarity specification of adaxial/abaxial axis | GO:0009944 | Development | Development | P | 23    | 6   | 0.94   | 6.36  | 8.06E-04 | 3.77E-02 |
| 7 | 1919 | F2-3 vs. S2-3 | S2-3 up | + | polymeric cytoskeletal fiber                   | GO:0099513 | Development | Development | C | 155   | 22  | 6.36   | 3.46  | 2.02E-06 | 4.47E-05 |
| 7 | 1920 | F2-3 vs. S2-3 | S2-3 up | + | post-embryonic development                     | GO:0009791 | Development | Development | P | 1482  | 101 | 60.81  | 1.66  | 2.01E-06 | 1.60E-04 |
| 7 | 1921 | F2-3 vs. S2-3 | S2-3 up | + | protein storage vacuole                        | GO:0000326 | Development | Development | C | 13    | 4   | 0.53   | 7.5   | 3.79E-03 | 3.58E-02 |
| 7 | 1922 | F2-3 vs. S2-3 | S2-3 up | + | regionalization                                | GO:0003002 | Development | Development | P | 155   | 23  | 6.36   | 3.62  | 5.99E-07 | 5.34E-05 |
| 7 | 1923 | F2-3 vs. S2-3 | S2-3 up | + | reproductive shoot system development          | GO:0090567 | Development | Development | P | 371   | 43  | 15.22  | 2.82  | 8.73E-09 | 1.00E-06 |
| 7 | 1924 | F2-3 vs. S2-3 | S2-3 up | + | reproductive structure development             | GO:0048608 | Development | Development | P | 1206  | 89  | 49.49  | 1.8   | 3.59E-07 | 3.40E-05 |
| 7 | 1925 | F2-3 vs. S2-3 | S2-3 up | + | reproductive system development                | GO:0061458 | Development | Development | P | 1208  | 89  | 49.57  | 1.8   | 3.71E-07 | 3.47E-05 |
| 7 | 1926 | F2-3 vs. S2-3 | S2-3 up | + | seed development                               | GO:0048316 | Development | Development | P | 725   | 52  | 29.75  | 1.75  | 2.34E-04 | 1.30E-02 |



|   |      |               |         |   |                                                                |            |             |                      |   |       |     |        |      |          |          |
|---|------|---------------|---------|---|----------------------------------------------------------------|------------|-------------|----------------------|---|-------|-----|--------|------|----------|----------|
| 7 | 1927 | F2-3 vs. S2-3 | S2-3 up | + | shoot system development                                       | GO:0048367 | Development | Development          | P | 728   | 71  | 29.87  | 2.38 | 2.24E-10 | 2.97E-08 |
| 7 | 1928 | F2-3 vs. S2-3 | S2-3 up | + | shoot system morphogenesis                                     | GO:0010016 | Development | Development          | P | 172   | 21  | 7.06   | 2.98 | 2.71E-05 | 1.74E-03 |
| 7 | 1929 | F2-3 vs. S2-3 | S2-3 up | + | stomatal complex development                                   | GO:0010374 | Development | Development          | P | 55    | 9   | 2.26   | 3.99 | 8.72E-04 | 4.04E-02 |
| 7 | 1930 | F2-3 vs. S2-3 | S2-3 up | + | structural molecule activity                                   | GO:0005198 | Development | Development          | F | 443   | 116 | 18.18  | 6.38 | 1.51E-50 | 2.42E-47 |
| 7 | 1931 | F2-3 vs. S2-3 | S2-3 up | + | symplast                                                       | GO:0055044 | Development | Development          | C | 944   | 100 | 38.74  | 2.58 | 2.26E-16 | 1.18E-14 |
| 7 | 1932 | F2-3 vs. S2-3 | S2-3 up | + | system development                                             | GO:0048731 | Development | Development          | P | 1867  | 128 | 76.61  | 1.67 | 4.55E-08 | 4.61E-06 |
| 7 | 1933 | F2-3 vs. S2-3 | S2-3 up | + | vacuolar membrane                                              | GO:0005774 | Development | Development          | C | 570   | 44  | 23.39  | 1.88 | 1.40E-04 | 2.00E-03 |
| 7 | 1934 | F2-3 vs. S2-3 | S2-3 up | + | vacuole                                                        | GO:0005773 | Development | Development          | C | 1083  | 79  | 44.44  | 1.78 | 3.12E-06 | 6.62E-05 |
| 7 | 1935 | F2-3 vs. S2-3 | S2-3 up | + | amide biosynthetic process                                     | GO:0043604 | Metabolism  | Metabolism           | P | 591   | 126 | 24.25  | 5.2  | 1.44E-46 | 2.15E-43 |
| 7 | 1936 | F2-3 vs. S2-3 | S2-3 up | + | anchoring junction                                             | GO:0070161 | Metabolism  | Metabolism           | C | 944   | 100 | 38.74  | 2.58 | 2.26E-16 | 1.12E-14 |
| 7 | 1937 | F2-3 vs. S2-3 | S2-3 up | + | binding                                                        | GO:0005488 | Metabolism  | Metabolism           | F | 9843  | 576 | 403.9  | 1.43 | 1.22E-24 | 6.54E-22 |
| 7 | 1938 | F2-3 vs. S2-3 | S2-3 up | + | biological_process                                             | GO:0008150 | Metabolism  | Metabolism           | P | 21988 | 981 | 902.27 | 1.09 | 1.48E-09 | 1.84E-07 |
| 7 | 1939 | F2-3 vs. S2-3 | S2-3 up | + | biosynthetic process                                           | GO:0009058 | Metabolism  | Metabolism           | P | 2811  | 221 | 115.35 | 1.92 | 7.97E-20 | 1.76E-17 |
| 7 | 1940 | F2-3 vs. S2-3 | S2-3 up | + | catalytic complex                                              | GO:1902494 | Metabolism  | Metabolism           | C | 1168  | 90  | 47.93  | 1.88 | 4.67E-08 | 1.43E-06 |
| 7 | 1941 | F2-3 vs. S2-3 | S2-3 up | + | cellular amide metabolic process                               | GO:0043603 | Metabolism  | Metabolism           | P | 722   | 129 | 29.63  | 4.35 | 1.73E-40 | 1.48E-37 |
| 7 | 1942 | F2-3 vs. S2-3 | S2-3 up | + | cellular aromatic compound metabolic process                   | GO:0006725 | Metabolism  | Metabolism           | P | 2519  | 151 | 103.37 | 1.46 | 5.18E-06 | 3.78E-04 |
| 7 | 1943 | F2-3 vs. S2-3 | S2-3 up | + | cellular biosynthetic process                                  | GO:0044249 | Metabolism  | Metabolism           | P | 2583  | 215 | 105.99 | 2.03 | 3.75E-22 | 1.12E-19 |
| 7 | 1944 | F2-3 vs. S2-3 | S2-3 up | + | cellular macromolecule biosynthetic process                    | GO:0034645 | Metabolism  | Metabolism           | P | 1279  | 178 | 52.48  | 3.39 | 1.16E-42 | 1.16E-39 |
| 7 | 1945 | F2-3 vs. S2-3 | S2-3 up | + | cellular macromolecule metabolic process                       | GO:0044260 | Metabolism  | Metabolism           | P | 4426  | 323 | 181.62 | 1.78 | 7.16E-25 | 2.68E-22 |
| 7 | 1946 | F2-3 vs. S2-3 | S2-3 up | + | cellular metabolic process                                     | GO:0044237 | Metabolism  | Metabolism           | P | 7649  | 443 | 313.87 | 1.41 | 5.12E-16 | 8.75E-14 |
| 7 | 1947 | F2-3 vs. S2-3 | S2-3 up | + | cellular nitrogen compound biosynthetic process                | GO:0044271 | Metabolism  | Metabolism           | P | 1241  | 161 | 50.92  | 3.16 | 3.63E-35 | 2.41E-32 |
| 7 | 1948 | F2-3 vs. S2-3 | S2-3 up | + | cellular nitrogen compound metabolic process                   | GO:0034641 | Metabolism  | Metabolism           | P | 2872  | 264 | 117.85 | 2.24 | 4.19E-34 | 2.50E-31 |
| 7 | 1949 | F2-3 vs. S2-3 | S2-3 up | + | cellular protein metabolic process                             | GO:0044267 | Metabolism  | Metabolism           | P | 3388  | 256 | 139.02 | 1.84 | 4.55E-21 | 1.18E-18 |
| 7 | 1950 | F2-3 vs. S2-3 | S2-3 up | + | cellular protein-containing complex assembly                   | GO:0034622 | Metabolism  | Metabolism           | P | 474   | 74  | 19.45  | 3.8  | 1.88E-20 | 4.50E-18 |
| 7 | 1951 | F2-3 vs. S2-3 | S2-3 up | + | DNA metabolic process                                          | GO:0006259 | Metabolism  | Metabolism           | P | 448   | 35  | 18.38  | 1.9  | 5.53E-04 | 2.71E-02 |
| 7 | 1952 | F2-3 vs. S2-3 | S2-3 up | + | heterocycle metabolic process                                  | GO:0046483 | Metabolism  | Metabolism           | P | 2393  | 150 | 98.2   | 1.53 | 6.01E-07 | 5.29E-05 |
| 7 | 1953 | F2-3 vs. S2-3 | S2-3 up | + | heterocyclic compound binding                                  | GO:1901363 | Metabolism  | Metabolism           | F | 4765  | 311 | 195.53 | 1.59 | 7.64E-17 | 3.07E-14 |
| 7 | 1954 | F2-3 vs. S2-3 | S2-3 up | + | macromolecule biosynthetic process                             | GO:0009059 | Metabolism  | Metabolism           | P | 1334  | 178 | 54.74  | 3.25 | 1.87E-40 | 1.40E-37 |
| 7 | 1955 | F2-3 vs. S2-3 | S2-3 up | + | macromolecule metabolic process                                | GO:0043170 | Metabolism  | Metabolism           | P | 5496  | 382 | 225.53 | 1.69 | 1.75E-26 | 8.03E-24 |
| 7 | 1956 | F2-3 vs. S2-3 | S2-3 up | + | metabolic process                                              | GO:0008152 | Metabolism  | Metabolism           | P | 8681  | 474 | 356.22 | 1.33 | 6.14E-13 | 9.18E-11 |
| 7 | 1957 | F2-3 vs. S2-3 | S2-3 up | + | microtubule binding                                            | GO:0008017 | Metabolism  | Metabolism           | F | 162   | 19  | 6.65   | 2.86 | 1.04E-04 | 2.23E-02 |
| 7 | 1958 | F2-3 vs. S2-3 | S2-3 up | + | molecular_function                                             | GO:0003674 | Metabolism  | Metabolism           | F | 21945 | 967 | 900.5  | 1.07 | 5.15E-07 | 1.38E-04 |
| 7 | 1959 | F2-3 vs. S2-3 | S2-3 up | + | nitrogen compound metabolic process                            | GO:0006807 | Metabolism  | Metabolism           | P | 6150  | 396 | 252.36 | 1.57 | 1.75E-21 | 4.75E-19 |
| 7 | 1960 | F2-3 vs. S2-3 | S2-3 up | + | nucleic acid binding                                           | GO:0003676 | Metabolism  | Metabolism           | F | 3299  | 270 | 135.37 | 1.99 | 3.03E-27 | 1.95E-24 |
| 7 | 1961 | F2-3 vs. S2-3 | S2-3 up | + | organic cyclic compound binding                                | GO:0097159 | Metabolism  | Metabolism           | F | 4794  | 313 | 196.72 | 1.59 | 6.36E-17 | 2.92E-14 |
| 7 | 1962 | F2-3 vs. S2-3 | S2-3 up | + | organic cyclic compound metabolic process                      | GO:1901360 | Metabolism  | Metabolism           | P | 2607  | 156 | 106.98 | 1.46 | 4.31E-06 | 3.22E-04 |
| 7 | 1963 | F2-3 vs. S2-3 | S2-3 up | + | organic substance biosynthetic process                         | GO:1901576 | Metabolism  | Metabolism           | P | 2674  | 214 | 109.73 | 1.95 | 4.89E-20 | 1.12E-17 |
| 7 | 1964 | F2-3 vs. S2-3 | S2-3 up | + | organic substance metabolic process                            | GO:0071704 | Metabolism  | Metabolism           | P | 7851  | 445 | 322.16 | 1.38 | 1.67E-14 | 2.63E-12 |
| 7 | 1965 | F2-3 vs. S2-3 | S2-3 up | + | organonitrogen compound biosynthetic process                   | GO:1901566 | Metabolism  | Metabolism           | P | 1343  | 157 | 55.11  | 2.85 | 1.17E-29 | 5.85E-27 |
| 7 | 1966 | F2-3 vs. S2-3 | S2-3 up | + | organonitrogen compound metabolic process                      | GO:1901564 | Metabolism  | Metabolism           | P | 4611  | 289 | 189.21 | 1.53 | 2.09E-13 | 3.20E-11 |
| 7 | 1967 | F2-3 vs. S2-3 | S2-3 up | + | peptide metabolic process                                      | GO:0006518 | Metabolism  | Metabolism           | P | 585   | 128 | 24.01  | 5.33 | 2.24E-48 | 4.46E-45 |
| 7 | 1968 | F2-3 vs. S2-3 | S2-3 up | + | protein binding                                                | GO:0005515 | Metabolism  | Metabolism           | F | 5446  | 328 | 223.47 | 1.47 | 3.60E-13 | 1.28E-10 |
| 7 | 1969 | F2-3 vs. S2-3 | S2-3 up | + | protein metabolic process                                      | GO:0019538 | Metabolism  | Metabolism           | P | 3544  | 260 | 145.43 | 1.79 | 8.95E-20 | 1.91E-17 |
| 7 | 1970 | F2-3 vs. S2-3 | S2-3 up | + | Sm-like protein family complex                                 | GO:0120114 | Metabolism  | Metabolism           | C | 86    | 19  | 3.53   | 5.38 | 2.64E-08 | 8.86E-07 |
| 7 | 1971 | F2-3 vs. S2-3 | S2-3 up | + | supramolecular complex                                         | GO:0099080 | Metabolism  | Metabolism           | C | 255   | 31  | 10.46  | 2.96 | 4.01E-07 | 9.72E-06 |
| 7 | 1972 | F2-3 vs. S2-3 | S2-3 up | + | supramolecular fiber                                           | GO:0099512 | Metabolism  | Metabolism           | C | 155   | 22  | 6.36   | 3.46 | 2.02E-06 | 4.38E-05 |
| 7 | 1973 | F2-3 vs. S2-3 | S2-3 up | + | supramolecular polymer                                         | GO:0099081 | Metabolism  | Metabolism           | C | 155   | 22  | 6.36   | 3.46 | 2.02E-06 | 4.57E-05 |
| 7 | 1974 | F2-3 vs. S2-3 | S2-3 up | + | transferase complex                                            | GO:1990234 | Metabolism  | Metabolism           | C | 698   | 48  | 28.64  | 1.68 | 1.08E-03 | 1.21E-02 |
| 7 |      | F2-3 vs. S2-3 | S2-3 up | + | transferase complex, transferring phosphorus-containing groups | GO:0061695 |             |                      | C |       |     |        | 2.21 | 1.56E-03 | 1.69E-02 |
|   | 1975 |               |         |   |                                                                |            | Metabolism  | Metabolism           |   | 232   | 21  | 9.52   |      |          |          |
| 7 | 1976 | F2-3 vs. S2-3 | S2-3 up | + | tubulin binding                                                | GO:0015631 | Metabolism  | Metabolism           | F | 172   | 20  | 7.06   | 2.83 | 7.71E-05 | 1.91E-02 |
| 7 | 1977 | F2-3 vs. S2-3 | S2-3 up | + | plastid large ribosomal subunit                                | GO:0000311 | Metabolism  | Photosynthesis       | C | 15    | 4   | 0.62   | 6.5  | 5.79E-03 | 4.94E-02 |
| 7 | 1978 | F2-3 vs. S2-3 | S2-3 up | + | plastid ribosome                                               | GO:0009547 | Metabolism  | Photosynthesis       | C | 29    | 8   | 1.19   | 6.72 | 7.92E-05 | 1.25E-03 |
| 7 | 1979 | F2-3 vs. S2-3 | S2-3 up | + | plastid small ribosomal subunit                                | GO:0000312 | Metabolism  | Photosynthesis       | C | 13    | 4   | 0.53   | 7.5  | 3.79E-03 | 3.52E-02 |
| 7 | 1980 | F2-3 vs. S2-3 | S2-3 up | + | endoplasmic reticulum                                          | GO:0005783 | Regulation  | Protein modification | C | 1044  | 71  | 42.84  | 1.66 | 7.76E-05 | 1.24E-03 |
| 7 | 1981 | F2-3 vs. S2-3 | S2-3 up | + | endoplasmic reticulum membrane                                 | GO:0005789 | Regulation  | Protein modification | C | 297   | 30  | 12.19  | 2.46 | 1.97E-05 | 3.66E-04 |
| 7 | 1982 | F2-3 vs. S2-3 | S2-3 up | + | protein-containing complex assembly                            | GO:0065003 | Regulation  | Protein modification | P | 534   | 77  | 21.91  | 3.51 | 1.98E-19 | 3.95E-17 |
| 7 | 1983 | F2-3 vs. S2-3 | S2-3 up | + | protein-containing complex subunit organization                | GO:0043933 | Regulation  | Protein modification | P | 609   | 79  | 24.99  | 3.16 | 1.67E-17 | 3.21E-15 |
| 7 | 1984 | F2-3 vs. S2-3 | S2-3 up | + | negative regulation of biological process                      | GO:0048519 | Regulation  | Regulation           | P | 1102  | 83  | 45.22  | 1.84 | 3.88E-07 | 3.57E-05 |
| 7 | 1985 | F2-3 vs. S2-3 | S2-3 up | + | negative regulation of cellular process                        | GO:0048523 | Regulation  | Regulation           | P | 743   | 55  | 30.49  | 1.8  | 6.31E-05 | 3.81E-03 |
| 7 |      | F2-3 vs. S2-3 | S2-3 up | + | negative regulation of macromolecule metabolic process         | GO:0010605 |             |                      | P |       |     |        | 1.82 | 3.00E-04 | 1.59E-02 |
|   | 1986 |               |         |   |                                                                |            | Regulation  | Regulation           |   | 603   | 45  | 24.74  |      |          |          |

|   |      |               |         |   |                                                 |            |                        |               |   |      |     |        |       |          |          |
|---|------|---------------|---------|---|-------------------------------------------------|------------|------------------------|---------------|---|------|-----|--------|-------|----------|----------|
| 7 | 1987 | F2-3 vs. S2-3 | S2-3 up | + | negative regulation of metabolic process        | GO:0009892 | Regulation             | Regulation    | P | 653  | 50  | 26.8   | 1.87  | 7.09E-05 | 4.16E-03 |
| 7 | 1988 | F2-3 vs. S2-3 | S2-3 up | + | regulation of biological process                | GO:0050789 | Regulation             | Regulation    | P | 5407 | 272 | 221.87 | 1.23  | 3.37E-04 | 1.72E-02 |
| 7 | 1989 | F2-3 vs. S2-3 | S2-3 up | + | regulation of cellular process                  | GO:0050794 | Regulation             | Regulation    | P | 4751 | 240 | 194.95 | 1.23  | 7.57E-04 | 3.56E-02 |
| 7 | 1990 | F2-3 vs. S2-3 | S2-3 up | + | regulation of macromolecule metabolic process   | GO:0060255 | Regulation             | Regulation    | P | 3058 | 168 | 125.48 | 1.34  | 1.73E-04 | 9.92E-03 |
| 7 | 1991 | F2-3 vs. S2-3 | S2-3 up | + | regulation of metabolic process                 | GO:0019222 | Regulation             | Regulation    | P | 3325 | 179 | 136.44 | 1.31  | 2.45E-04 | 1.34E-02 |
| 7 | 1992 | F2-3 vs. S2-3 | S2-3 up | + | multicellular organismal process                | GO:0032501 | Signaling and response | Signaling     | P | 2741 | 159 | 112.48 | 1.41  | 1.76E-05 | 1.20E-03 |
| 7 | 1993 | F2-3 vs. S2-3 | S2-3 up | + | protein kinase complex                          | GO:1902911 | Signaling and response | Signaling     | C | 87   | 10  | 3.57   | 2.8   | 4.93E-03 | 4.38E-02 |
| 7 | 1994 | F2-3 vs. S2-3 | S2-3 up | + | serine/threonine protein kinase complex         | GO:1902554 | Signaling and response | Signaling     | C | 79   | 10  | 3.24   | 3.08  | 2.64E-03 | 2.61E-02 |
| 7 | 1995 | F2-3 vs. S2-3 | S2-3 up | + | cellular response to DNA damage stimulus        | GO:0006974 | Signaling and response | Stress        | P | 350  | 30  | 14.36  | 2.09  | 4.36E-04 | 2.17E-02 |
| 7 | 1996 | F2-3 vs. S2-3 | S2-3 up | + | endopeptidase Clp complex                       | GO:0009368 | Signaling and response | Stress        | C | 11   | 4   | 0.45   | 8.86  | 2.31E-03 | 2.38E-02 |
| 7 | 1997 | F2-3 vs. S2-3 | S2-3 up | + | gene expression                                 | GO:0010467 | Regulation             | Transcription | P | 1608 | 208 | 65.98  | 3.15  | 9.70E-46 | 1.16E-42 |
| 7 | 1998 | F2-3 vs. S2-3 | S2-3 up | + | gene silencing                                  | GO:0016458 | Regulation             | Transcription | P | 153  | 16  | 6.28   | 2.55  | 1.10E-03 | 4.91E-02 |
| 7 | 1999 | F2-3 vs. S2-3 | S2-3 up | + | mRNA processing                                 | GO:0006397 | Regulation             | Transcription | P | 286  | 32  | 11.74  | 2.73  | 1.36E-06 | 1.12E-04 |
| 7 | 2000 | F2-3 vs. S2-3 | S2-3 up | + | negative regulation of gene expression          | GO:0010629 | Regulation             | Transcription | P | 493  | 41  | 20.23  | 2.03  | 6.46E-05 | 3.86E-03 |
| 7 | 2001 | F2-3 vs. S2-3 | S2-3 up | + | nuclear speck                                   | GO:0016607 | Regulation             | Transcription | C | 61   | 8   | 2.5    | 3.2   | 5.66E-03 | 4.87E-02 |
| 7 | 2002 | F2-3 vs. S2-3 | S2-3 up | + | nucleolus                                       | GO:0005730 | Regulation             | Transcription | C | 483  | 70  | 19.82  | 3.53  | 7.20E-18 | 4.69E-16 |
| 7 | 2003 | F2-3 vs. S2-3 | S2-3 up | + | regulation of gene expression                   | GO:0010468 | Regulation             | Transcription | P | 2679 | 147 | 109.93 | 1.34  | 5.18E-04 | 2.56E-02 |
| 7 | 2004 | F2-3 vs. S2-3 | S2-3 up | + | RNA binding                                     | GO:0003723 | Regulation             | Transcription | F | 1569 | 178 | 64.38  | 2.76  | 2.96E-32 | 3.18E-29 |
| 7 | 2005 | F2-3 vs. S2-3 | S2-3 up | + | catalytic step 2 spliceosome                    | GO:0071013 | Regulation             | Translation   | C | 64   | 10  | 2.63   | 3.81  | 6.33E-04 | 7.75E-03 |
| 7 | 2006 | F2-3 vs. S2-3 | S2-3 up | + | cytoplasmic translation                         | GO:0002181 | Regulation             | Translation   | P | 72   | 18  | 2.95   | 6.09  | 1.19E-08 | 1.29E-06 |
| 7 | 2007 | F2-3 vs. S2-3 | S2-3 up | + | cytosolic large ribosomal subunit               | GO:0022625 | Regulation             | Translation   | C | 131  | 58  | 5.38   | 10.79 | 1.57E-35 | 1.63E-33 |
| 7 | 2008 | F2-3 vs. S2-3 | S2-3 up | + | cytosolic ribosome                              | GO:0022626 | Regulation             | Translation   | C | 303  | 101 | 12.43  | 8.12  | 5.70E-52 | 8.48E-50 |
| 7 | 2009 | F2-3 vs. S2-3 | S2-3 up | + | cytosolic small ribosomal subunit               | GO:0022627 | Regulation             | Translation   | C | 102  | 40  | 4.19   | 9.56  | 2.47E-23 | 2.14E-21 |
| 7 | 2010 | F2-3 vs. S2-3 | S2-3 up | + | large ribosomal subunit                         | GO:0015934 | Regulation             | Translation   | C | 180  | 70  | 7.39   | 9.48  | 9.87E-40 | 1.14E-37 |
| 7 | 2011 | F2-3 vs. S2-3 | S2-3 up | + | large ribosomal subunit rRNA binding            | GO:0070180 | Regulation             | Translation   | F | 14   | 6   | 0.57   | 10.44 | 8.91E-05 | 2.05E-02 |
| 7 | 2012 | F2-3 vs. S2-3 | S2-3 up | + | Lsm1-7-Pat1 complex                             | GO:1990726 | Regulation             | Translation   | C | 7    | 3   | 0.29   | 10.44 | 5.95E-03 | 5.00E-02 |
| 7 | 2013 | F2-3 vs. S2-3 | S2-3 up | + | maturation of LSU-rRNA                          | GO:0000470 | Regulation             | Translation   | P | 46   | 10  | 1.89   | 5.3   | 5.94E-05 | 3.63E-03 |
| 7 | 2014 | F2-3 vs. S2-3 | S2-3 up | + | maturation of SSU-rRNA                          | GO:0030490 | Regulation             | Translation   | P | 54   | 13  | 2.22   | 5.87  | 1.81E-06 | 1.47E-04 |
| 7 | 2015 | F2-3 vs. S2-3 | S2-3 up | + | mitochondrial large ribosomal subunit           | GO:0005762 | Regulation             | Translation   | C | 32   | 8   | 1.31   | 6.09  | 1.42E-04 | 2.00E-03 |
| 7 | 2016 | F2-3 vs. S2-3 | S2-3 up | + | mitochondrial ribosome                          | GO:0005761 | Regulation             | Translation   | C | 51   | 10  | 2.09   | 4.78  | 1.26E-04 | 1.87E-03 |
| 7 | 2017 | F2-3 vs. S2-3 | S2-3 up | + | mRNA binding                                    | GO:0003729 | Regulation             | Translation   | F | 1005 | 135 | 41.24  | 3.27  | 8.90E-31 | 7.15E-28 |
| 7 | 2018 | F2-3 vs. S2-3 | S2-3 up | + | mRNA metabolic process                          | GO:0016071 | Regulation             | Translation   | P | 423  | 39  | 17.36  | 2.25  | 9.30E-06 | 6.70E-04 |
| 7 | 2019 | F2-3 vs. S2-3 | S2-3 up | + | mRNA splicing, via spliceosome                  | GO:0000398 | Regulation             | Translation   | P | 201  | 25  | 8.25   | 3.03  | 3.60E-06 | 2.80E-04 |
| 7 | 2020 | F2-3 vs. S2-3 | S2-3 up | + | ncRNA metabolic process                         | GO:0034660 | Regulation             | Translation   | P | 455  | 48  | 18.67  | 2.57  | 1.98E-08 | 2.04E-06 |
| 7 | 2021 | F2-3 vs. S2-3 | S2-3 up | + | ncRNA processing                                | GO:0034470 | Regulation             | Translation   | P | 381  | 43  | 15.63  | 2.75  | 1.76E-08 | 1.85E-06 |
| 7 | 2022 | F2-3 vs. S2-3 | S2-3 up | + | organellar large ribosomal subunit              | GO:0000315 | Regulation             | Translation   | C | 45   | 11  | 1.85   | 5.96  | 9.92E-06 | 1.91E-04 |
| 7 | 2023 | F2-3 vs. S2-3 | S2-3 up | + | organellar ribosome                             | GO:0000313 | Regulation             | Translation   | C | 75   | 17  | 3.08   | 5.52  | 1.03E-07 | 2.97E-06 |
| 7 | 2024 | F2-3 vs. S2-3 | S2-3 up | + | organellar small ribosomal subunit              | GO:0000314 | Regulation             | Translation   | C | 29   | 6   | 1.19   | 5.04  | 2.25E-03 | 2.35E-02 |
| 7 | 2025 | F2-3 vs. S2-3 | S2-3 up | + | peptide biosynthetic process                    | GO:0043043 | Regulation             | Translation   | P | 518  | 125 | 21.26  | 5.88  | 3.54E-51 | 1.06E-47 |
| 7 | 2026 | F2-3 vs. S2-3 | S2-3 up | + | pICln-Sm protein complex                        | GO:0034715 | Regulation             | Translation   | C | 6    | 3   | 0.25   | 12.18 | 4.29E-03 | 3.88E-02 |
| 7 | 2027 | F2-3 vs. S2-3 | S2-3 up | + | precatalytic spliceosome                        | GO:0071011 | Regulation             | Translation   | C | 31   | 8   | 1.27   | 6.29  | 1.18E-04 | 1.77E-03 |
| 7 | 2028 | F2-3 vs. S2-3 | S2-3 up | + | preribosome                                     | GO:0030684 | Regulation             | Translation   | C | 90   | 11  | 3.69   | 2.98  | 2.12E-03 | 2.25E-02 |
| 7 | 2029 | F2-3 vs. S2-3 | S2-3 up | + | ribonucleoprotein complex                       | GO:1990904 | Regulation             | Translation   | C | 677  | 149 | 27.78  | 5.36  | 1.01E-56 | 3.50E-54 |
| 7 | 2030 | F2-3 vs. S2-3 | S2-3 up | + | ribonucleoprotein complex assembly              | GO:0022618 | Regulation             | Translation   | P | 163  | 51  | 6.69   | 7.62  | 1.17E-25 | 5.02E-23 |
| 7 | 2031 | F2-3 vs. S2-3 | S2-3 up | + | ribonucleoprotein complex biogenesis            | GO:0022613 | Regulation             | Translation   | P | 447  | 90  | 18.34  | 4.91  | 1.03E-31 | 5.59E-29 |
| 7 | 2032 | F2-3 vs. S2-3 | S2-3 up | + | ribonucleoprotein complex subunit organization  | GO:0071826 | Regulation             | Translation   | P | 166  | 51  | 6.81   | 7.49  | 2.35E-25 | 9.38E-23 |
| 7 | 2033 | F2-3 vs. S2-3 | S2-3 up | + | ribosomal large subunit assembly                | GO:0000027 | Regulation             | Translation   | P | 43   | 15  | 1.76   | 8.5   | 4.76E-09 | 5.58E-07 |
| 7 | 2034 | F2-3 vs. S2-3 | S2-3 up | + | ribosomal large subunit biogenesis              | GO:0042273 | Regulation             | Translation   | P | 109  | 32  | 4.47   | 7.15  | 6.05E-16 | 1.00E-13 |
| 7 | 2035 | F2-3 vs. S2-3 | S2-3 up | + | ribosomal small subunit assembly                | GO:0000028 | Regulation             | Translation   | P | 38   | 17  | 1.56   | 10.9  | 1.97E-11 | 2.80E-09 |
| 7 | 2036 | F2-3 vs. S2-3 | S2-3 up | + | ribosomal small subunit biogenesis              | GO:0042274 | Regulation             | Translation   | P | 91   | 28  | 3.73   | 7.5   | 1.49E-14 | 2.41E-12 |
| 7 | 2037 | F2-3 vs. S2-3 | S2-3 up | + | ribosomal subunit                               | GO:0044391 | Regulation             | Translation   | C | 316  | 116 | 12.97  | 8.95  | 2.39E-63 | 2.48E-60 |
| 7 | 2038 | F2-3 vs. S2-3 | S2-3 up | + | ribosome                                        | GO:0005840 | Regulation             | Translation   | C | 399  | 120 | 16.37  | 7.33  | 1.01E-57 | 5.26E-55 |
| 7 | 2039 | F2-3 vs. S2-3 | S2-3 up | + | ribosome assembly                               | GO:0042255 | Regulation             | translation   | P | 90   | 34  | 3.69   | 9.21  | 1.25E-19 | 2.58E-17 |
| 7 | 2040 | F2-3 vs. S2-3 | S2-3 up | + | ribosome biogenesis                             | GO:0042254 | Regulation             | Translation   | P | 370  | 72  | 15.18  | 4.74  | 8.76E-25 | 3.08E-22 |
| 7 | 2041 | F2-3 vs. S2-3 | S2-3 up | + | RNA processing                                  | GO:0006396 | Regulation             | Translation   | P | 787  | 77  | 32.29  | 2.38  | 2.93E-11 | 4.08E-09 |
| 7 | 2042 | F2-3 vs. S2-3 | S2-3 up | + | RNA splicing                                    | GO:0008380 | Regulation             | Translation   | P | 276  | 26  | 11.33  | 2.3   | 2.45E-04 | 1.33E-02 |
| 7 | 2043 | F2-3 vs. S2-3 | S2-3 up | + | RNA splicing, via transesterification reactions | GO:0000375 | Regulation             | Translation   | P | 225  | 25  | 9.23   | 2.71  | 2.10E-05 | 1.38E-03 |
| 7 |      | F2-3 vs. S2-3 | S2-3 up | + | RNA splicing, via transesterification reactions | GO:0000377 |                        |               | P |      |     |        | 2.71  | 2.10E-05 | 1.39E-03 |
|   | 2044 |               |         |   | with bulged adenosine as nucleophile            |            | Regulation             | Translation   |   | 225  | 25  | 9.23   |       |          |          |
| 7 | 2045 | F2-3 vs. S2-3 | S2-3 up | + | rRNA binding                                    | GO:0019843 | Regulation             | Translation   | F | 72   | 18  | 2.95   | 6.09  | 1.19E-08 | 3.83E-06 |
| 7 | 2046 | F2-3 vs. S2-3 | S2-3 up | + | rRNA metabolic process                          | GO:0016072 | Regulation             | Translation   | P | 263  | 35  | 10.79  | 3.24  | 9.57E-09 | 1.08E-06 |
| 7 | 2047 | F2-3 vs. S2-3 | S2-3 up | + | rRNA processing                                 | GO:0006364 | Regulation             | Translation   | P | 254  | 34  | 10.42  | 3.26  | 1.36E-08 | 1.46E-06 |

|   |      |               |         |   |                                         |            |            |              |   |     |     |       |      |          |          |
|---|------|---------------|---------|---|-----------------------------------------|------------|------------|--------------|---|-----|-----|-------|------|----------|----------|
| 7 | 2048 | F2-3 vs. S2-3 | S2-3 up | + | small nuclear ribonucleoprotein complex | GO:0030532 | Regulation | Translation  | C | 78  | 17  | 3.2   | 5.31 | 1.67E-07 | 4.25E-06 |
| 7 | 2049 | F2-3 vs. S2-3 | S2-3 up | + | small ribosomal subunit                 | GO:0015935 | Regulation | Translation  | C | 136 | 46  | 5.58  | 8.24 | 1.98E-24 | 1.87E-22 |
| 7 | 2050 | F2-3 vs. S2-3 | S2-3 up | + | spliceosomal complex                    | GO:0005681 | Regulation | Translation  | C | 160 | 17  | 6.57  | 2.59 | 6.65E-04 | 8.04E-03 |
| 7 | 2051 | F2-3 vs. S2-3 | S2-3 up | + | spliceosomal snRNP assembly             | GO:0000387 | Regulation | Translation  | P | 25  | 8   | 1.03  | 7.8  | 3.27E-05 | 2.04E-03 |
| 7 | 2052 | F2-3 vs. S2-3 | S2-3 up | + | spliceosomal snRNP complex              | GO:0097525 | Regulation | Translation  | C | 78  | 17  | 3.2   | 5.31 | 1.67E-07 | 4.36E-06 |
| 7 | 2053 | F2-3 vs. S2-3 | S2-3 up | + | spliceosomal tri-snRNP complex          | GO:0097526 | Regulation | Translation  | C | 41  | 10  | 1.68  | 5.94 | 2.55E-05 | 4.57E-04 |
| 7 | 2054 | F2-3 vs. S2-3 | S2-3 up | + | structural constituent of ribosome      | GO:0003735 | Regulation | Translation  | F | 325 | 106 | 13.34 | 7.95 | 8.80E-54 | 2.83E-50 |
| 7 | 2055 | F2-3 vs. S2-3 | S2-3 up | + | translation                             | GO:0006412 | Regulation | Translation  | P | 513 | 125 | 21.05 | 5.94 | 1.43E-51 | 8.57E-48 |
| 7 | 2056 | F2-3 vs. S2-3 | S2-3 up | + | U1 snRNP                                | GO:0005685 | Regulation | Translation  | C | 24  | 9   | 0.98  | 9.14 | 3.65E-06 | 7.59E-05 |
| 7 | 2057 | F2-3 vs. S2-3 | S2-3 up | + | U12-type spliceosomal complex           | GO:0005689 | Regulation | Translation  | C | 24  | 5   | 0.98  | 5.08 | 5.09E-03 | 4.42E-02 |
| 7 | 2058 | F2-3 vs. S2-3 | S2-3 up | + | U2 snRNP                                | GO:0005686 | Regulation | Translation  | C | 34  | 7   | 1.4   | 5.02 | 1.01E-03 | 1.14E-02 |
| 7 | 2059 | F2-3 vs. S2-3 | S2-3 up | + | U4 snRNP                                | GO:0005687 | Regulation | Translation  | C | 12  | 4   | 0.49  | 8.12 | 2.99E-03 | 2.88E-02 |
| 7 | 2060 | F2-3 vs. S2-3 | S2-3 up | + | U4/U6 x U5 tri-snRNP complex            | GO:0046540 | Regulation | Translation  | C | 32  | 6   | 1.31  | 4.57 | 3.47E-03 | 3.31E-02 |
| 7 | 2061 | F2-3 vs. S2-3 | S2-3 up | + | U5 snRNP                                | GO:0005682 | Regulation | translation  | C | 19  | 7   | 0.78  | 8.98 | 4.94E-05 | 8.29E-04 |
| 7 | 2062 | F2-3 vs. S2-3 | S2-3 up | + | macromolecule localization              | GO:0033036 | Metabolism | Transporters | P | 941 | 61  | 38.61 | 1.58 | 8.82E-04 | 4.03E-02 |
| 7 | 2063 | F2-3 vs. S2-3 | S2-3 up | + | plasmodesma                             | GO:0009506 | Metabolism | Transporters | C | 944 | 100 | 38.74 | 2.58 | 2.26E-16 | 1.31E-14 |
| 7 | 2064 | F2-3 vs. S2-3 | S2-3 up | + | storage vacuole                         | GO:0000322 | Metabolism | Transporters | C | 13  | 4   | 0.53  | 7.5  | 3.79E-03 | 3.55E-02 |
