# Supplementary material for: Whether Gametophytes Are Reduced or Unreduced in Angiosperms Might Be Determined Metabolically
Source: MDPI journal article supplement (doi:10.3390/genes11121449), 2020-12-02
Supplement: s1 [file s1]

**Table S3.** Calculations for chi square tests of independence and for the determination of standard and adjusted residuals. Yellow highlighted values are significant at  $P < 0.05$ . Orange highlights indicate minimal absolute value adjustments made to accommodate overrepresentation gene ontology (OGO) analyses where underrepresented (-) GO categories were present.

| Type | Test | Up + - | Group     | Subgroup | Obs | Obs | Total | Exp    | Exp    | Chi square | 1st % | 2nd % | standard residuals |        | p value |        | adjusted residuals |         | p value |
|------|------|--------|-----------|----------|-----|-----|-------|--------|--------|------------|-------|-------|--------------------|--------|---------|--------|--------------------|---------|---------|
| EGO  | L1M1 | +      | Sig & Res | Sig      | 29  | 2   | 31    | 16.06  | 14.94  | 21.64      | 20.1  | 1.5   | 3.23               | -3.35  | 0.0012  | 0.0008 | 4.9354             | -4.9354 | 0.0000  |
| EGO  | L1M1 | +      | Sig & Res | Stress   | 21  | 1   | 22    | 11.40  | 10.60  | 16.79      | 14.6  | 0.7   | 2.85               | -2.95  | 0.0044  | 0.0032 | 4.2704             | -4.2704 | 0.0000  |
| EGO  | L1M1 | +      | Metab     | Bioen    | 12  | 0   | 12    | 6.22   | 5.78   | 11.17      | 8.3   | 0.0   | 2.32               | -2.41  | 0.0203  | 0.0162 | 3.4162             | -3.4162 | 0.0006  |
| EGO  | L1M1 | +      | Metab     | Photosyn | 5   | 3   | 8     | 4.14   | 3.86   | 0.37       | 3.5   | 2.2   | 0.42               | -0.44  | 0.6741  | 0.6629 | 0.6147             | -0.6147 | 0.5388  |
| EGO  | L1M1 | +      | Metab     | Metab    | 27  | 13  | 40    | 20.72  | 19.28  | 3.95       | 18.8  | 9.7   | 1.38               | -1.43  | 0.1677  | 0.1526 | 2.1479             | -2.1479 | 0.0317  |
| EGO  | L1M1 | +      | Metab     | Catab    | 30  | 2   | 32    | 16.58  | 15.42  | 22.56      | 20.8  | 1.5   | 3.30               | -3.42  | 0.0010  | 0.0006 | 5.0488             | -5.0488 | 0.0000  |
| EGO  | L1M1 | +      | Metab     | Transp   | 7   | 1   | 8     | 4.14   | 3.86   | 4.08       | 4.9   | 0.7   | 1.40               | -1.45  | 0.1606  | 0.1458 | 2.0506             | -2.0506 | 0.0403  |
| EGO  | L1M1 | +      | Reg       | Reg      |     |     |       |        |        |            | 0.0   | 0.0   |                    |        |         |        |                    |         |         |
| EGO  | L1M1 | +      | Reg       | Prot mod | 3   | 2   | 5     | 2.59   | 2.41   | 0.13       | 2.1   | 1.5   | 0.25               | -0.26  | 0.7989  | 0.7917 | 0.3704             | -0.3704 | 0.7111  |
| EGO  | L1M1 | +      | Reg       | Transcri | 0   | 8   | 8     | 4.14   | 3.86   | 8.60       | 0.0   | 6.0   | -2.04              | 2.11   | 0.0418  | 0.0348 | -2.9752            | 2.9752  | 0.0029  |
| EGO  | L1M1 | +      | Reg       | Transla  | 0   | 36  | 36    | 18.65  | 17.35  | 38.69      | 0.0   | 26.9  | -4.32              | 4.48   | 0.0000  | 0.0000 | -6.6665            | 6.6665  | 0.0000  |
| EGO  | L1M1 | +      | Devel     | Devel    | 8   | 21  | 29    | 15.02  | 13.98  | 6.81       | 5.6   | 15.7  | -1.81              | 1.88   | 0.0700  | 0.0604 | -2.7572            | 2.7572  | 0.0058  |
| EGO  | L1M1 | +      | Devel     | Cell div | 2   | 45  | 47    | 24.35  | 22.65  | 42.55      | 1.4   | 33.6  | -4.53              | 4.69   | 0.0000  | 0.0000 | -7.1559            | 7.1559  | 0.0000  |
|      |      |        |           |          | 144 | 134 | 278   | 144.00 | 134.00 | 177.34     | 100.0 | 100.0 | SS                 | 177.34 |         |        |                    |         |         |
| EGO  | L2M2 | +      | Sig & Res | Sig      |     |     |       |        |        |            |       |       |                    |        |         |        |                    |         |         |
| EGO  | L2M2 | +      | Sig & Res | Stress   |     |     |       |        |        |            |       |       |                    |        |         |        |                    |         |         |
| EGO  | L2M2 | +      | Metab     | Bioen    | 6   | 0   | 6     | 5.24   | 0.76   | 0.87       | 8.7   | 0.0   | 0.33               | -0.87  | 0.7401  | 0.3835 | 0.9701             | -0.9701 | 0.3320  |
| EGO  | L2M2 | +      | Metab     | Photosyn | 6   | 0   | 6     | 5.24   | 0.76   | 0.87       | 8.7   | 0.0   | 0.33               | -0.87  | 0.7401  | 0.3835 | 0.9701             | -0.9701 | 0.3320  |
| EGO  | L2M2 | +      | Metab     | Metab    | 20  | 9   | 29    | 25.33  | 3.67   | 8.86       | 29.0  | 90.0  | -1.06              | 2.78   | 0.2897  | 0.0054 | -3.7410            | 3.7410  | 0.0002  |
| EGO  | L2M2 | +      | Metab     | Catab    | 4   | 0   | 4     | 3.49   | 0.51   | 0.58       | 5.8   | 0.0   | 0.27               | -0.71  | 0.7865  | 0.4767 | 0.7814             | -0.7814 | 0.4346  |
| EGO  | L2M2 | +      | Metab     | Transp   | 1   | 1   | 2     | 1.75   | 0.25   | 2.52       | 1.4   | 10.0  | -0.57              | 1.48   | 0.5720  | 0.1377 | -1.6087            | 1.6087  | 0.1077  |
| EGO  | L2M2 | +      | Reg       | Reg      |     |     |       |        |        |            |       |       |                    |        |         |        |                    |         |         |
| EGO  | L2M2 | +      | Reg       | Prot mod |     |     |       |        |        |            |       |       |                    |        |         |        |                    |         |         |
| EGO  | L2M2 | +      | Reg       | Transcri | 2   | 0   | 2     | 1.75   | 0.25   | 0.29       | 2.9   | 0.0   | 0.19               | -0.50  | 0.8481  | 0.6149 | 0.5453             | -0.5453 | 0.5855  |
| EGO  | L2M2 | +      | Reg       | Transla  | 3   | 0   | 3     | 2.62   | 0.38   | 0.43       | 4.3   | 0.0   | 0.23               | -0.62  | 0.8145  | 0.5377 | 0.6723             | -0.6723 | 0.5014  |
| EGO  | L2M2 | +      | Devel     | Devel    | 22  | 0   | 22    | 19.22  | 2.78   | 3.19       | 31.9  | 0.0   | 0.64               | -1.67  | 0.5252  | 0.0952 | 2.1021             | -2.1021 | 0.0355  |
| EGO  | L2M2 | +      | Devel     | Cell div | 5   | 0   | 5     | 4.37   | 0.63   | 0.72       | 7.2   | 0.0   | 0.30               | -0.80  | 0.7620  | 0.4263 | 0.8795             | -0.8795 | 0.3791  |
|      |      |        |           |          | 69  | 10  | 79    | 69.00  | 10.00  | 18.34      | 100.0 | 100.0 | SS                 | 18.34  |         |        |                    |         |         |
| EGO  | L4M4 | +      | Sig & Res | Sig      | 0   | 19  | 19    | 4.03   | 14.97  | 5.12       | 0.0   | 24.4  | -2.01              | 1.04   | 0.0447  | 0.2976 | -2.5160            | 2.5160  | 0.0119  |
| EGO  | L4M4 | +      | Sig & Res | Stress   | 0   | 7   | 7     | 1.48   | 5.52   | 1.88       | 0.0   | 9.0   | -1.22              | 0.63   | 0.2230  | 0.5272 | -1.4241            | 1.4241  | 0.1544  |
| EGO  | L4M4 | +      | Metab     | Bioen    | 1   | 4   | 5     | 1.06   | 3.94   | 0.00       | 4.8   | 5.1   | -0.06              | 0.03   | 0.9531  | 0.9756 | -0.0680            | 0.0680  | 0.9458  |
| EGO  | L4M4 | +      | Metab     | Photosyn | 7   | 0   | 7     | 1.48   | 5.52   | 26.00      | 33.3  | 0.0   | 4.53               | -2.35  | 0.0000  | 0.0189 | 5.2894             | -5.2894 | 0.0000  |
| EGO  | L4M4 | +      | Metab     | Metab    | 3   | 31  | 34    | 7.21   | 26.79  | 3.12       | 14.3  | 39.7  | -1.57              | 0.81   | 0.1168  | 0.4157 | -2.1807            | 2.1807  | 0.0292  |
| EGO  | L4M4 | +      | Metab     | Catab    | 0   | 1   | 1     | 0.21   | 0.79   | 0.27       | 0.0   | 1.3   | -0.46              | 0.24   | 0.6451  | 0.8111 | -0.5215            | 0.5215  | 0.6020  |
| EGO  | L4M4 | +      | Metab     | Transp   | 1   | 3   | 4     | 0.85   | 3.15   | 0.03       | 4.8   | 3.8   | 0.16               | -0.09  | 0.8693  | 0.9320 | 0.1892             | -0.1892 | 0.8500  |
| EGO  | L4M4 | +      | Reg       | Reg      |     |     |       |        |        |            |       |       |                    |        |         |        |                    |         |         |
| EGO  | L4M4 | +      | Reg       | Prot mod |     |     |       |        |        |            |       |       |                    |        |         |        |                    |         |         |
| EGO  | L4M4 | +      | Reg       | Transcri |     |     |       |        |        |            |       |       |                    |        |         |        |                    |         |         |
| EGO  | L4M4 | +      | Reg       | Transla  | 0   | 8   | 8     | 1.70   | 6.30   | 2.15       | 0.0   | 10.3  | -1.30              | 0.68   | 0.1927  | 0.4991 | -1.5307            | 1.5307  | 0.1258  |
| EGO  | L4M4 | +      | Devel     | Devel    | 8   | 1   | 9     | 1.91   | 7.09   | 24.66      | 38.1  | 1.3   | 4.41               | -2.29  | 0.0000  | 0.0222 | 5.2088             | -5.2088 | 0.0000  |
| EGO  | L4M4 | +      | Devel     | Cell div | 1   | 4   | 5     | 1.06   | 3.94   | 0.00       | 4.8   | 5.1   | -0.06              | 0.03   | 0.9531  | 0.9756 | -0.0680            | 0.0680  | 0.9458  |
|      |      |        |           |          | 21  | 78  | 99    | 21.00  | 78.00  | 63.25      | ##### | ##### | SS                 | 63.25  |         |        |                    |         |         |
| EGO  | F2L2 | +      | Sig & Res | Sig      | 39  | 12  | 51    | 23.99  | 27.01  | 17.73      | 8.3   | 2.3   | 3.06               | -2.89  | 0.0022  | 0.0039 | 4.3228             | -4.3228 | 0.0000  |
| EGO  | F2L2 | +      | Sig & Res | Stress   | 64  | 3   | 67    | 31.52  | 35.48  | 63.21      | 13.6  | 0.6   | 5.79               | -5.45  | 0.0000  | 0.0000 | 8.2321             | -8.2321 | 0.0000  |
| EGO  | F2L2 | +      | Metab     | Bioen    | 67  | 4   | 71    | 33.40  | 37.60  | 63.83      | 14.3  | 0.8   | 5.81               | -5.48  | 0.0000  | 0.0000 | 8.2900             | -8.2900 | 0.0000  |
| EGO  | F2L2 | +      | Metab     | Photosyn | 30  | 0   | 30    | 14.11  | 15.89  | 33.77      | 6.4   | 0.0   | 4.23               | -3.99  | 0.0000  | 0.0001 | 5.9010             | -5.9010 | 0.0000  |
| EGO  | F2L2 | +      | Metab     | Metab    | 123 | 39  | 162   | 76.21  | 85.79  | 54.25      | 26.2  | 7.4   | 5.36               | -5.05  | 0.0000  | 0.0000 | 8.0486             | -8.0486 | 0.0000  |
| EGO  | F2L2 | +      | Metab     | Catab    | 17  | 26  | 43    | 20.23  | 22.77  | 0.97       | 3.6   | 4.9   | -0.72              | 0.68   | 0.4730  | 0.4988 | -1.0081            | 1.0081  | 0.3134  |
| EGO  | F2L2 | +      | Metab     | Transp   | 54  | 8   | 62    | 29.17  | 32.83  | 39.93      | 11.5  | 1.5   | 4.60               | -4.33  | 0.0000  | 0.0000 | 6.5252             | -6.5252 | 0.0000  |
| EGO  | F2L2 | +      | Reg       | Reg      | 5   | 29  | 34    | 15.99  | 18.01  | 14.27      | 1.1   | 5.5   | -2.75              | 2.59   | 0.0060  | 0.0096 | -3.8436            | 3.8436  | 0.0001  |
| EGO  | F2L2 | +      | Reg       | Prot mod | 2   | 16  | 18    | 8.47   | 9.53   | 9.33       | 0.4   | 3.0   | -2.22              | 2.09   | 0.0262  | 0.0362 | -3.0821            | 3.0821  | 0.0021  |
| EGO  | F2L2 | +      | Reg       | Transcri | 0   | 87  | 87    | 40.93  | 46.07  | 77.28      | 0.0   | 16.5  | -6.40              | 6.03   | 0.0000  | 0.0000 | -9.2014            | 9.2014  | 0.0000  |
| EGO  | F2L2 | +      | Reg       | Transla  | 1   | 94  | 95    | 44.69  | 50.31  | 80.65      | 0.2   | 17.8  | -6.54              | 6.16   | 0.0000  | 0.0000 | -9.4416            | 9.4416  | 0.0000  |
| EGO  | F2L2 | +      | Devel     | Devel    | 59  | 63  | 122   | 57.39  | 64.61  | 0.09       | 12.6  | 11.9  | 0.21               | -0.20  | 0.8317  | 0.8413 | 0.3117             | -0.3117 | 0.7553  |
| EGO  | F2L2 | +      | Devel     | Cell div | 8   | 147 | 155   | 72.91  | 82.09  | 109.13     | 1.7   | 27.8  | -7.60              | 7.16   | 0.0000  | 0.0000 | -11.3672           | 11.3672 | 0.0000  |
|      |      |        |           |          | 469 | 528 | 997   | 469.00 | 528.00 | 564.44     | ##### | ##### | SS                 | 564.44 |         |        |                    |         |         |
| EGO  | F3L3 | +      | Sig & Res | Sig      | 58  | 11  | 69    | 40.10  | 28.90  | 19.07      | 9.1   | 2.4   | 2.83               | -3.33  | 0.0047  | 0.0009 | 4.5114             | -4.5114 | 0.0000  |

|     |      |   |           |          |     |     |      |        |        |        |       |       |       |        |        |        |          |         |        |
|-----|------|---|-----------|----------|-----|-----|------|--------|--------|--------|-------|-------|-------|--------|--------|--------|----------|---------|--------|
| EGO | F3L3 | + | Sig & Res | Stress   | 78  | 3   | 81   | 47.08  | 33.92  | 48.50  | 12.2  | 0.7   | 4.51  | -5.31  | 0.0000 | 0.0000 | 7.2367   | -7.2367 | 0.0000 |
| EGO | F3L3 | + | Metab     | Bioen    | 76  | 3   | 79   | 45.92  | 33.08  | 47.07  | 11.9  | 0.7   | 4.44  | -5.23  | 0.0000 | 0.0000 | 7.1222   | -7.1222 | 0.0000 |
| EGO | F3L3 | + | Metab     | Photosyn | 26  | 0   | 26   | 15.11  | 10.89  | 18.73  | 4.1   | 0.0   | 2.80  | -3.30  | 0.0051 | 0.0010 | 4.3806   | -4.3806 | 0.0000 |
| EGO | F3L3 | + | Metab     | Metab    | 192 | 42  | 234  | 136.00 | 98.00  | 55.06  | 30.1  | 9.2   | 4.80  | -5.66  | 0.0000 | 0.0000 | 8.3667   | -8.3667 | 0.0000 |
| EGO | F3L3 | + | Metab     | Catab    | 33  | 11  | 44   | 25.57  | 18.43  | 5.15   | 5.2   | 2.4   | 1.47  | -1.73  | 0.1419 | 0.0836 | 2.3164   | -2.3164 | 0.0205 |
| EGO | F3L3 | + | Metab     | Transp   | 74  | 7   | 81   | 47.08  | 33.92  | 36.76  | 11.6  | 1.5   | 3.92  | -4.62  | 0.0001 | 0.0000 | 6.3006   | -6.3006 | 0.0000 |
| EGO | F3L3 | + | Reg       | Reg      | 6   | 29  | 35   | 20.34  | 14.66  | 24.15  | 0.9   | 6.3   | -3.18 | 3.75   | 0.0015 | 0.0002 | -4.9942  | 4.9942  | 0.0000 |
| EGO | F3L3 | + | Reg       | Prot mod | 3   | 20  | 23   | 13.37  | 9.63   | 19.20  | 0.5   | 4.4   | -2.84 | 3.34   | 0.0046 | 0.0008 | -4.4285  | 4.4285  | 0.0000 |
| EGO | F3L3 | + | Reg       | Transcri | 0   | 81  | 81   | 47.08  | 33.92  | 112.41 | 0.0   | 17.6  | -6.86 | 8.08   | 0.0000 | 0.0000 | -11.0174 | 11.0174 | 0.0000 |
| EGO | F3L3 | + | Reg       | Transla  | 1   | 87  | 88   | 51.15  | 36.85  | 117.40 | 0.2   | 19.0  | -7.01 | 8.26   | 0.0000 | 0.0000 | -11.2981 | 11.2981 | 0.0000 |
| EGO | F3L3 | + | Devel     | Devel    | 75  | 51  | 126  | 73.23  | 52.77  | 0.10   | 11.8  | 11.1  | 0.21  | -0.24  | 0.8363 | 0.8077 | 0.3394   | -0.3394 | 0.7343 |
| EGO | F3L3 | + | Devel     | Cell div | 15  | 114 | 129  | 74.98  | 54.02  | 114.56 | 2.4   | 24.8  | -6.93 | 8.16   | 0.0000 | 0.0000 | -11.3947 | 11.3947 | 0.0000 |
|     |      |   |           |          | 637 | 459 | 1096 | 637.00 | 459.00 | 618.16 | ##### | ##### | SS    | 618.16 |        |        |          |         |        |
| EGO | F2M2 | + | Sig & Res | Sig      | 48  | 10  | 58   | 31.59  | 26.41  | 18.72  | 9.3   | 2.3   | 2.92  | -3.19  | 0.0035 | 0.0014 | 4.4645   | -4.4645 | 0.0000 |
| EGO | F2M2 | + | Sig & Res | Stress   | 75  | 6   | 81   | 44.12  | 36.88  | 47.47  | 14.5  | 1.4   | 4.65  | -5.08  | 0.0000 | 0.0000 | 7.2034   | -7.2034 | 0.0000 |
| EGO | F2M2 | + | Metab     | Bioen    | 60  | 4   | 64   | 34.86  | 29.14  | 39.82  | 11.6  | 0.9   | 4.26  | -4.66  | 0.0000 | 0.0000 | 6.5339   | -6.5339 | 0.0000 |
| EGO | F2M2 | + | Metab     | Photosyn | 41  | 0   | 41   | 22.33  | 18.67  | 34.27  | 7.9   | 0.0   | 3.95  | -4.32  | 0.0001 | 0.0000 | 5.9847   | -5.9847 | 0.0000 |
| EGO | F2M2 | + | Metab     | Metab    | 138 | 33  | 171  | 93.14  | 77.86  | 47.45  | 26.6  | 7.6   | 4.65  | -5.08  | 0.0000 | 0.0000 | 7.6060   | -7.6060 | 0.0000 |
| EGO | F2M2 | + | Metab     | Catab    | 26  | 31  | 57   | 31.05  | 25.95  | 1.80   | 5.0   | 7.2   | -0.91 | 0.99   | 0.3650 | 0.3218 | -1.3846  | 1.3846  | 0.1662 |
| EGO | F2M2 | + | Metab     | Transp   | 57  | 7   | 64   | 34.86  | 29.14  | 30.88  | 11.0  | 1.6   | 3.75  | -4.10  | 0.0002 | 0.0000 | 5.7542   | -5.7542 | 0.0000 |
| EGO | F2M2 | + | Reg       | Reg      | 0   | 29  | 29   | 15.80  | 13.20  | 34.69  | 0.0   | 6.7   | -3.97 | 4.35   | 0.0001 | 0.0000 | -5.9820  | 5.9820  | 0.0000 |
| EGO | F2M2 | + | Reg       | Prot mod | 3   | 12  | 15   | 8.17   | 6.83   | 7.19   | 0.6   | 2.8   | -1.81 | 1.98   | 0.0705 | 0.0479 | -2.7021  | 2.7021  | 0.0069 |
| EGO | F2M2 | + | Reg       | Transcri | 0   | 56  | 56   | 30.50  | 25.50  | 66.99  | 0.0   | 12.9  | -5.52 | 6.04   | 0.0000 | 0.0000 | -8.4371  | 8.4371  | 0.0000 |
| EGO | F2M2 | + | Reg       | Transla  | 1   | 85  | 86   | 46.84  | 39.16  | 98.54  | 0.2   | 19.6  | -6.70 | 7.33   | 0.0000 | 0.0000 | -10.4083 | 10.4083 | 0.0000 |
| EGO | F2M2 | + | Devel     | Devel    | 61  | 38  | 99   | 53.92  | 45.08  | 2.04   | 11.8  | 8.8   | 0.96  | -1.05  | 0.3353 | 0.2919 | -1.5087  | 1.5087  | 0.1314 |
| EGO | F2M2 | + | Devel     | Cell div | 8   | 122 | 130  | 70.81  | 59.19  | 122.36 | 1.5   | 28.2  | -7.46 | 8.16   | 0.0000 | 0.0000 | -11.9054 | 11.9054 | 0.0000 |
|     |      |   |           |          | 518 | 433 | 951  | 518.00 | 433.00 | 552.22 | ##### | ##### | SS    | 552.22 |        |        |          |         |        |
| EGO | F3M3 | + | Sig & Res | Sig      | 60  | 10  | 70   | 40.03  | 29.97  | 23.27  | 10.1  | 2.3   | 3.16  | -3.65  | 0.0016 | 0.0003 | 4.9956   | -4.9956 | 0.0000 |
| EGO | F3M3 | + | Sig & Res | Stress   | 65  | 2   | 67   | 38.31  | 28.69  | 43.41  | 11.0  | 0.5   | 4.31  | -4.98  | 0.0000 | 0.0000 | 6.8127   | -6.8127 | 0.0000 |
| EGO | F3M3 | + | Metab     | Bioen    | 74  | 4   | 78   | 44.60  | 33.40  | 45.25  | 12.5  | 0.9   | 4.40  | -5.09  | 0.0000 | 0.0000 | 6.9950   | -6.9950 | 0.0000 |
| EGO | F3M3 | + | Metab     | Photosyn | 29  | 0   | 29   | 16.58  | 12.42  | 21.71  | 4.9   | 0.0   | 3.05  | -3.52  | 0.0023 | 0.0004 | 4.7263   | -4.7263 | 0.0000 |
| EGO | F3M3 | + | Metab     | Metab    | 174 | 35  | 209  | 119.51 | 89.49  | 58.01  | 29.3  | 7.9   | 4.98  | -5.76  | 0.0000 | 0.0000 | 8.5239   | -8.5239 | 0.0000 |
| EGO | F3M3 | + | Metab     | Catab    | 26  | 10  | 36   | 20.59  | 15.41  | 3.33   | 4.4   | 2.3   | 1.19  | -1.38  | 0.2328 | 0.1679 | 1.8560   | -1.8560 | 0.0635 |
| EGO | F3M3 | + | Metab     | Transp   | 73  | 6   | 79   | 45.18  | 33.82  | 40.03  | 12.3  | 1.4   | 4.14  | -4.78  | 0.0000 | 0.0000 | 6.5823   | -6.5823 | 0.0000 |
| EGO | F3M3 | + | Reg       | Reg      | 7   | 37  | 44   | 25.16  | 18.84  | 30.62  | 1.2   | 8.3   | -3.62 | 4.18   | 0.0003 | 0.0000 | -5.6544  | 5.6544  | 0.0000 |
| EGO | F3M3 | + | Reg       | Prot mod | 3   | 18  | 21   | 12.01  | 8.99   | 15.78  | 0.5   | 4.1   | -2.60 | 3.00   | 0.0093 | 0.0027 | -4.0138  | 4.0138  | 0.0001 |
| EGO | F3M3 | + | Reg       | Transcri | 0   | 70  | 70   | 40.03  | 29.97  | 93.49  | 0.0   | 15.8  | -6.33 | 7.31   | 0.0000 | 0.0000 | -10.0129 | 10.0129 | 0.0000 |
| EGO | F3M3 | + | Reg       | Transla  | 1   | 74  | 75   | 42.89  | 32.11  | 95.55  | 0.2   | 16.7  | -6.40 | 7.39   | 0.0000 | 0.0000 | -10.1490 | 10.1490 | 0.0000 |
| EGO | F3M3 | + | Devel     | Devel    | 71  | 38  | 109  | 62.33  | 46.67  | 2.82   | 12.0  | 8.6   | 1.10  | -1.27  | 0.2722 | 0.2044 | 1.7740   | -1.7740 | 0.0761 |
| EGO | F3M3 | + | Devel     | Cell div | 10  | 140 | 150  | 85.78  | 64.22  | 156.35 | 1.7   | 31.5  | -8.18 | 9.46   | 0.0000 | 0.0000 | -13.5200 | 13.5200 | 0.0000 |
|     |      |   |           |          | 593 | 444 | 1037 | 593.00 | 444.00 | 629.62 | ##### | ##### | SS    | 629.62 |        |        |          |         |        |
| EGO | L3S3 | + | Sig & Res | Sig      | 0   | 0   | 0    | 0.00   | 0.00   |        |       |       |       |        |        |        |          |         |        |
| EGO | L3S3 | + | Sig & Res | Stress   | 0   | 1   | 1    | 0.07   | 0.93   | 0.07   | 0.0   | 0.8   | -0.26 | 0.07   | 0.7970 | 0.9454 | -0.2672  | 0.2672  | 0.7893 |
| EGO | L3S3 | + | Metab     | Bioen    | 1   | 8   | 9    | 0.60   | 8.40   | 0.29   | 11.1  | 6.3   | 0.52  | -0.14  | 0.6003 | 0.8891 | 0.5612   | -0.5612 | 0.5747 |
| EGO | L3S3 | + | Metab     | Photosyn | 2   | 1   | 3    | 0.20   | 2.80   | 17.51  | 22.2  | 0.8   | 4.04  | -1.08  | 0.0001 | 0.2818 | 4.2308   | -4.2308 | 0.0000 |
| EGO | L3S3 | + | Metab     | Metab    | 5   | 20  | 25   | 1.65   | 23.35  | 7.24   | 55.6  | 15.7  | 2.60  | -0.69  | 0.0093 | 0.4887 | 2.9794   | -2.9794 | 0.0029 |
| EGO | L3S3 | + | Metab     | Catab    | 1   | 3   | 4    | 0.26   | 3.74   | 2.19   | 11.1  | 2.4   | 1.43  | -0.38  | 0.1530 | 0.7036 | 1.5012   | -1.5012 | 0.1333 |
| EGO | L3S3 | + | Metab     | Transp   | 0   | 2   | 2    | 0.13   | 1.87   | 0.14   | 0.0   | 1.6   | -0.36 | 0.10   | 0.7160 | 0.9228 | -0.3793  | 0.3793  | 0.7045 |
| EGO | L3S3 | + | Reg       | Reg      | 0   | 14  | 14   | 0.93   | 13.07  | 0.99   | 0.0   | 11.0  | -0.96 | 0.26   | 0.3358 | 0.7978 | -1.0517  | 1.0517  | 0.2930 |
| EGO | L3S3 | + | Reg       | Prot mod | 0   | 1   | 1    | 0.07   | 0.93   | 0.07   | 0.0   | 0.8   | -0.26 | 0.07   | 0.7970 | 0.9454 | -0.2672  | 0.2672  | 0.7893 |
| EGO | L3S3 | + | Reg       | Transcri | 0   | 9   | 9    | 0.60   | 8.40   | 0.64   | 0.0   | 7.1   | -0.77 | 0.21   | 0.4403 | 0.8372 | -0.8264  | 0.8264  | 0.4086 |
| EGO | L3S3 | + | Reg       | Transla  | 0   | 28  | 28   | 1.85   | 26.15  | 1.98   | 0.0   | 22.0  | -1.36 | 0.36   | 0.1734 | 0.7171 | -1.5807  | 1.5807  | 0.1139 |
| EGO | L3S3 | + | Devel     | Devel    | 0   | 36  | 36   | 2.38   | 33.62  | 2.55   | 0.0   | 28.3  | -1.54 | 0.41   | 0.1227 | 0.6812 | -1.8627  | 1.8627  | 0.0625 |
| EGO | L3S3 | + | Devel     | Cell div | 0   | 4   | 4    | 0.26   | 3.74   | 0.28   | 0.0   | 3.1   | -0.51 | 0.14   | 0.6069 | 0.8911 | -0.5404  | 0.5404  | 0.5889 |
|     |      |   |           |          | 9   | 127 | 136  | 9.00   | 127.00 | 33.96  | ##### | ##### | SS    | 33.96  |        |        |          |         |        |
| EGO | M3S3 | + | Sig & Res | Sig      |     |     |      |        |        |        |       |       |       |        |        |        |          |         |        |
| EGO | M3S3 | + | Sig & Res | Stress   |     |     |      |        |        |        |       |       |       |        |        |        |          |         |        |
| EGO | M3S3 | + | Metab     | Bioen    | 2   | 16  | 18   | 3.14   | 14.86  | 0.50   | 6.7   | 11.3  | -0.64 | 0.30   | 0.5201 | 0.7675 | -0.7480  | 0.7480  | 0.4544 |
| EGO | M3S3 | + | Metab     | Photosyn | 19  | 19  | 38   | 6.63   | 31.37  | 27.97  | 63.3  | 13.4  | 4.81  | -2.21  | 0.0000 | 0.0272 | 5.9922   | -5.9922 | 0.0000 |
| EGO | M3S3 | + | Metab     | Catab    | 2   | 4   | 6    | 1.05   | 4.95   | 1.05   | 6.7   | 2.8   | 0.93  | -0.43  | 0.3513 | 0.6684 | 1.0442   | -1.0442 | 0.2964 |

|          |        |   |           |          |        |     |      |        |        |        |        |        |       |        |        |        |         |         |        |  |  |  |  |  |  |  |  |  |  |  |  |
|----------|--------|---|-----------|----------|--------|-----|------|--------|--------|--------|--------|--------|-------|--------|--------|--------|---------|---------|--------|--|--|--|--|--|--|--|--|--|--|--|--|
| EGO      | M3S3   | + | Metab     | Transp   | 3      | 3   | 6    | 1.05   | 4.95   | 4.42   | 10.0   | 2.1    | 1.91  | -0.88  | 0.0562 | 0.3801 | 2.1393  | -2.1393 | 0.0324 |  |  |  |  |  |  |  |  |  |  |  |  |
| EGO      | M3S3   | + | Reg       | Reg      | 0      | 14  | 14   | 2.44   | 11.56  | 2.96   | 0.0    | 9.9    | -1.56 | 0.72   | 0.1181 | 0.4726 | -1.7944 | 1.7944  | 0.0728 |  |  |  |  |  |  |  |  |  |  |  |  |
| EGO      | M3S3   | + | Reg       | Prot mod | 1      | 2   | 3    | 0.52   | 2.48   | 0.53   | 3.3    | 1.4    | 0.66  | -0.30  | 0.5099 | 0.7619 | 0.7318  | -0.7318 | 0.4643 |  |  |  |  |  |  |  |  |  |  |  |  |
| EGO      | M3S3   | + | Reg       | Transcri | 1      | 9   | 10   | 1.74   | 8.26   | 0.38   | 3.3    | 6.3    | -0.56 | 0.26   | 0.5731 | 0.7956 | -0.6390 | 0.6390  | 0.5228 |  |  |  |  |  |  |  |  |  |  |  |  |
| EGO      | M3S3   | + | Reg       | Transla  | 0      | 29  | 29   | 5.06   | 23.94  | 6.13   | 0.0    | 20.4   | -2.25 | 1.03   | 0.0245 | 0.3013 | -2.7146 | 2.7146  | 0.0066 |  |  |  |  |  |  |  |  |  |  |  |  |
| EGO      | M3S3   | + | Devel     | Devel    | 2      | 45  | 47   | 8.20   | 38.80  | 5.68   | 6.7    | 31.7   | -2.16 | 0.99   | 0.0304 | 0.3198 | -2.7946 | 2.7946  | 0.0052 |  |  |  |  |  |  |  |  |  |  |  |  |
| EGO      | M3S3   | + | Devel     | Cell div | 0      | 1   | 1    | 0.17   | 0.83   | 0.21   | 0.0    | 0.7    | -0.42 | 0.19   | 0.6762 | 0.8478 | -0.4610 | 0.4610  | 0.6448 |  |  |  |  |  |  |  |  |  |  |  |  |
|          |        |   |           |          | 30     | 142 | 172  | 30.00  | 142.00 | 49.83  | #####  | #####  | SS    | 49.83  |        |        |         |         |        |  |  |  |  |  |  |  |  |  |  |  |  |
| EGO      | F3S3   | + | Sig & Res | Sig      | 37     | 11  | 48   | 24.35  | 23.65  | 13.33  | 6.7    | 2.1    | 2.56  | -2.60  | 0.0104 | 0.0093 | 3.7346  | -3.7346 | 0.0002 |  |  |  |  |  |  |  |  |  |  |  |  |
| EGO      | F3S3   | + | Sig & Res | Stress   | 53     | 3   | 56   | 28.41  | 27.59  | 43.19  | 9.6    | 0.6    | 4.61  | -4.68  | 0.0000 | 0.0000 | 6.7483  | -6.7483 | 0.0000 |  |  |  |  |  |  |  |  |  |  |  |  |
| EGO      | F3S3   | + | Metab     | Bioen    | 71     | 9   | 80   | 40.59  | 39.41  | 46.25  | 12.9   | 1.7    | 4.77  | -4.84  | 0.0000 | 0.0000 | 7.0660  | -7.0660 | 0.0000 |  |  |  |  |  |  |  |  |  |  |  |  |
| EGO      | F3S3   | + | Metab     | Photosyn | 37     | 2   | 39   | 19.79  | 19.21  | 30.39  | 6.7    | 0.4    | 3.87  | -3.93  | 0.0001 | 0.0001 | 5.6148  | -5.6148 | 0.0000 |  |  |  |  |  |  |  |  |  |  |  |  |
| EGO      | F3S3   | + | Metab     | Metab    | 173    | 44  | 217  | 110.10 | 106.90 | 72.95  | 31.4   | 8.2    | 5.99  | -6.08  | 0.0000 | 0.0000 | 9.5480  | -9.5480 | 0.0000 |  |  |  |  |  |  |  |  |  |  |  |  |
| EGO      | F3S3   | + | Metab     | Catab    | 22     | 5   | 27   | 13.70  | 13.30  | 10.21  | 4.0    | 0.9    | 2.24  | -2.28  | 0.0249 | 0.0228 | 3.2359  | -3.2359 | 0.0012 |  |  |  |  |  |  |  |  |  |  |  |  |
| EGO      | F3S3   | + | Metab     | Transp   | 72     | 11  | 83   | 42.11  | 40.89  | 43.06  | 13.1   | 2.1    | 4.61  | -4.67  | 0.0000 | 0.0000 | 6.8282  | -6.8282 | 0.0000 |  |  |  |  |  |  |  |  |  |  |  |  |
| EGO      | F3S3   | + | Reg       | Reg      | 4      | 48  | 52   | 26.38  | 25.62  | 38.55  | 0.7    | 9.0    | -4.36 | 4.42   | 0.0000 | 0.0000 | -6.3628 | 6.3628  | 0.0000 |  |  |  |  |  |  |  |  |  |  |  |  |
| EGO      | F3S3   | + | Reg       | Prot mod | 1      | 17  | 18   | 9.13   | 8.87   | 14.70  | 0.2    | 3.2    | -2.69 | 2.73   | 0.0071 | 0.0063 | -3.8663 | 3.8663  | 0.0001 |  |  |  |  |  |  |  |  |  |  |  |  |
| EGO      | F3S3   | + | Reg       | Transcri | 0      | 76  | 76   | 38.56  | 37.44  | 78.27  | 0.0    | 14.2   | -6.21 | 6.30   | 0.0000 | 0.0000 | -9.1740 | 9.1740  | 0.0000 |  |  |  |  |  |  |  |  |  |  |  |  |
| EGO      | F3S3   | + | Reg       | Transla  | 1      | 91  | 92   | 46.68  | 45.32  | 90.74  | 0.2    | 17.0   | -6.69 | 6.78   | 0.0000 | 0.0000 | -9.9566 | 9.9566  | 0.0000 |  |  |  |  |  |  |  |  |  |  |  |  |
| EGO      | F3S3   | + | Devel     | Devel    | 65     | 101 | 166  | 84.22  | 81.78  | 8.91   | 11.8   | 18.9   | -2.09 | 2.13   | 0.0362 | 0.0335 | -3.2424 | 3.2424  | 0.0012 |  |  |  |  |  |  |  |  |  |  |  |  |
| EGO      | F3S3   | + | Devel     | Cell div | 15     | 117 | 132  | 66.97  | 65.03  | 81.87  | 2.7    | 21.9   | -6.35 | 6.45   | 0.0000 | 0.0000 | -9.6539 | 9.6539  | 0.0000 |  |  |  |  |  |  |  |  |  |  |  |  |
|          |        |   |           |          | 551    | 535 | 1086 | 551.00 | 535.00 | 572.42 | #####  | #####  | SS    | 572.42 |        |        |         |         |        |  |  |  |  |  |  |  |  |  |  |  |  |
| OGO      | L4M4   |   | Sig & Res | Sig      | 2      | 17  | 19   | 2.98   | 16.02  | 0.38   | 8.3    | 13.2   | -0.57 | 0.24   | 0.5701 | 0.8065 | -0.6609 | 0.6609  | 0.5087 |  |  |  |  |  |  |  |  |  |  |  |  |
| OGO      | L4M4   |   | Sig & Res | Stress   | 2      | 16  | 18   | 2.82   | 15.18  | 0.28   | 8.3    | 12.4   | -0.49 | 0.21   | 0.6241 | 0.8326 | -0.5682 | 0.5682  | 0.5699 |  |  |  |  |  |  |  |  |  |  |  |  |
| OGO      | L4M4   |   | Metab     | Bioen    | 3      | 6   | 9    | 1.41   | 7.59   | 2.12   | 12.5   | 4.7    | 1.34  | -0.58  | 0.1813 | 0.5642 | 1.5005  | -1.5005 | 0.1335 |  |  |  |  |  |  |  |  |  |  |  |  |
| OGO      | L4M4   |   | Metab     | Photosyn | 10     | 12  | 22   | 3.45   | 18.55  | 14.74  | 41.7   | 9.3    | 3.53  | -1.52  | 0.0004 | 0.1284 | 4.1492  | -4.1492 | 0.0000 |  |  |  |  |  |  |  |  |  |  |  |  |
| OGO      | L4M4   |   | Metab     | Metab    | 2      | 32  | 34   | 5.33   | 28.67  | 2.47   | 8.3    | 24.8   | -1.44 | 0.62   | 0.1489 | 0.5336 | -1.7824 | 1.7824  | 0.0747 |  |  |  |  |  |  |  |  |  |  |  |  |
| OGO      | L4M4   |   | Metab     | Catab    | 0      | 18  | 18   | 2.82   | 15.18  | 3.35   | 0.0    | 14.0   | -1.68 | 0.72   | 0.0929 | 0.4686 | -1.9482 | 1.9482  | 0.0514 |  |  |  |  |  |  |  |  |  |  |  |  |
| OGO      | L4M4   |   | Metab     | Transp   | 0      | 9   | 9    | 1.41   | 7.59   | 1.67   | 0.0    | 7.0    | -1.19 | 0.51   | 0.2348 | 0.6083 | -1.3338 | 1.3338  | 0.1823 |  |  |  |  |  |  |  |  |  |  |  |  |
| OGO      | L4M4   |   | Reg       | Reg      |        |     |      |        |        |        |        |        |       |        |        |        |         |         |        |  |  |  |  |  |  |  |  |  |  |  |  |
| OGO      | L4M4   |   | Reg       | Prot mod |        |     |      |        |        |        |        |        |       |        |        |        |         |         |        |  |  |  |  |  |  |  |  |  |  |  |  |
| OGO      | L4M4   |   | Reg       | Transcri | 0      | 1   | 1    | 0.16   | 0.84   | 0.19   | 0.0    | 0.8    | -0.40 | 0.17   | 0.6921 | 0.8644 | -0.4327 | 0.4327  | 0.6652 |  |  |  |  |  |  |  |  |  |  |  |  |
| OGO      | L4M4   |   | Reg       | Transla  | 0      | 3   | 3    | 0.47   | 2.53   | 0.56   | 0.0    | 2.3    | -0.69 | 0.30   | 0.4927 | 0.7673 | -0.7545 | 0.7545  | 0.4505 |  |  |  |  |  |  |  |  |  |  |  |  |
| OGO      | L4M4   |   | Devel     | Devel    | 5      | 15  | 20   | 3.14   | 16.86  | 1.31   | 20.8   | 11.6   | 1.05  | -0.45  | 0.2930 | 0.6501 | 1.2284  | -1.2284 | 0.2193 |  |  |  |  |  |  |  |  |  |  |  |  |
| OGO      | L4M4   |   | Devel     | Cell div |        |     |      |        |        |        |        |        |       |        |        |        |         |         |        |  |  |  |  |  |  |  |  |  |  |  |  |
|          |        |   |           |          | 24     | 129 | 153  | 24.00  | 129.00 | 27.08  | 100.00 | 100.00 | SS    | 27.08  |        |        |         |         |        |  |  |  |  |  |  |  |  |  |  |  |  |
| OGO      | F23L23 |   | Sig & Res | Sig      | 51     | 3   | 51   |        |        |        |        |        |       |        |        |        |         |         |        |  |  |  |  |  |  |  |  |  |  |  |  |
| OGO      | F23L23 |   | Sig & Res | Stress   | 49     | 1   | 49   |        |        |        |        |        |       |        |        |        |         |         |        |  |  |  |  |  |  |  |  |  |  |  |  |
| OGO      | F23L23 |   | Metab     | Bioen    | 61     | 1   | 61   |        |        |        |        |        |       |        |        |        |         |         |        |  |  |  |  |  |  |  |  |  |  |  |  |
| OGO      | F23L23 |   | Metab     | Photosyn | 23     | 0   | 23   |        |        |        |        |        |       |        |        |        |         |         |        |  |  |  |  |  |  |  |  |  |  |  |  |
| OGO      | F23L23 |   | Metab     | Metab    | 117    | 32  | 117  |        |        |        |        |        |       |        |        |        |         |         |        |  |  |  |  |  |  |  |  |  |  |  |  |
| OGO      | F23L23 |   | Metab     | Catab    | 17     | 1   | 17   |        |        |        |        |        |       |        |        |        |         |         |        |  |  |  |  |  |  |  |  |  |  |  |  |
| OGO      | F23L23 |   | Metab     | Transp   | 46     | 0   | 46   |        |        |        |        |        |       |        |        |        |         |         |        |  |  |  |  |  |  |  |  |  |  |  |  |
| OGO      | F23L23 |   | Reg       | Reg      | -1     | 8   | -1   |        |        |        |        |        |       |        |        |        |         |         |        |  |  |  |  |  |  |  |  |  |  |  |  |
| OGO      | F23L23 |   | Reg       | Prot mod | 2      | 2   | 2    |        |        |        |        |        |       |        |        |        |         |         |        |  |  |  |  |  |  |  |  |  |  |  |  |
| OGO      | F23L23 |   | Reg       | Transcri | -6     | 4   | -6   |        |        |        |        |        |       |        |        |        |         |         |        |  |  |  |  |  |  |  |  |  |  |  |  |
| OGO      | F23L23 |   | Reg       | Transla  | -3     | 33  | -3   |        |        |        |        |        |       |        |        |        |         |         |        |  |  |  |  |  |  |  |  |  |  |  |  |
| OGO      | F23L23 |   | Devel     | Devel    | 78     | 38  | 78   |        |        |        |        |        |       |        |        |        |         |         |        |  |  |  |  |  |  |  |  |  |  |  |  |
| OGO      | F23L23 |   | Devel     | Cell div | 13     | 21  | 13   |        |        |        |        |        |       |        |        |        |         |         |        |  |  |  |  |  |  |  |  |  |  |  |  |
|          |        |   |           |          | 447    | 144 | 591  |        |        |        |        |        |       |        |        |        |         |         |        |  |  |  |  |  |  |  |  |  |  |  |  |
|          |        |   |           |          | 0.3221 |     |      |        |        |        |        |        |       |        |        |        |         |         |        |  |  |  |  |  |  |  |  |  |  |  |  |
| Adjusted |        |   |           |          |        |     |      |        |        |        |        |        |       |        |        |        |         |         |        |  |  |  |  |  |  |  |  |  |  |  |  |
| OGO      | F23L23 |   | Sig & Res | Sig      | 51     | 3   | 54   | 40.39  | 13.61  | 11.06  | 11.2   | 1.9    | 1.67  | -2.88  | 0.0950 | 0.0040 | 3.4830  | -3.4830 | 0.0005 |  |  |  |  |  |  |  |  |  |  |  |  |
| OGO      | F23L23 |   | Sig & Res | Stress   | 49     | 1   | 50   | 37.40  | 12.60  | 14.28  | 10.7   | 0.6    | 1.90  | -3.27  | 0.0578 | 0.0011 | 3.9439  | -3.9439 | 0.0001 |  |  |  |  |  |  |  |  |  |  |  |  |
| OGO      | F23L23 |   | Metab     | Bioen    | 61     | 1   | 62   | 46.37  | 15.63  | 18.30  | 13.3   | 0.6    | 2.15  | -3.70  | 0.0317 | 0.0002 | 4.5135  | -4.5135 | 0.0000 |  |  |  |  |  |  |  |  |  |  |  |  |
| OGO      | F23L23 |   | Metab     | Photosyn | 23     | 0   | 23   | 17.20  | 5.80   | 7.75   | 5.0    | 0.0    | 1.40  | -2.41  | 0.1622 | 0.0161 | 2.8379  | -2.8379 | 0.0045 |  |  |  |  |  |  |  |  |  |  |  |  |
| OGO      | F23L23 |   | Metab     | Metab    | 117    | 32  | 149  | 111.45 | 37.55  | 1.10   | 25.6   | 20.8   | 0.53  | -0.91  | 0.5988 | 0.3647 | 1.2053  | -1.2053 | 0.2281 |  |  |  |  |  |  |  |  |  |  |  |  |
| OGO      | F23L23 |   | Metab     | Catab    | 17     | 1   | 18   | 13.46  | 4.54   | 3.69   | 3.7    | 0.6    | 0.96  | -1.66  | 0.3351 | 0.0968 | 1.9489  | -1.9489 | 0.0513 |  |  |  |  |  |  |  |  |  |  |  |  |
| OGO      | F23L23 |   | Metab     | Transp   | 46     | 0   | 46   | 34.41  | 11.59  | 15.50  | 10.1   | 0.0    | 1.98  | -3.41  | 0.0481 | 0.0007 | 4.0943  | -4.0943 | 0.0000 |  |  |  |  |  |  |  |  |  |  |  |  |
| OGO      | F23L23 |   | Reg       | Reg      | 0      | 9   | 9    | 6.73   | 2.27   | 26.71  | 0.0    | 5.8    | -2.59 | 4.47   | 0.0095 | 0.0000 | -5.2064 | 5.2064  | 0.0000 |  |  |  |  |  |  |  |  |  |  |  |  |
| OGO      | F23L23 |   | Reg       | Prot mod | 2      | 2   | 4    | 2.99   | 1.01   | 1.30   | 0.4    | 1.3    | -0.57 | 0.99   | 0.5664 | 0.3233 | -1.1459 | 1.1459  | 0.2518 |  |  |  |  |  |  |  |  |  |  |  |  |
| OGO      | F23L23 |   | Reg       | Transcri | 0      | 10  | 10   | 7.48   | 2.52   | 29.68  | 0.0    | 6.5    | -2.73 | 4.71   | 0.0062 | 0.0000 | -5.4926 | 5.4926  | 0.0000 |  |  |  |  |  |  |  |  |  |  |  |  |

|          |        |           |          |        |     |     |        |        |        |        |        |        |        |        |        |          |         |        |  |
|----------|--------|-----------|----------|--------|-----|-----|--------|--------|--------|--------|--------|--------|--------|--------|--------|----------|---------|--------|--|
| OGO      | F23L23 | Reg       | Transla  | 0      | 36  | 36  | 26.93  | 9.07   | 106.83 | 0.0    | 23.4   | -5.19  | 8.94   | 0.0000 | 0.0000 | -10.6546 | 10.6546 | 0.0000 |  |
| OGO      | F23L23 | Devel     | Devel    | 78     | 38  | 116 | 86.76  | 29.24  | 3.51   | 17.1   | 24.7   | -0.94  | 1.62   | 0.3468 | 0.1051 | -2.0818  | 2.0818  | 0.0374 |  |
| OGO      | F23L23 | Devel     | Cell div | 13     | 21  | 34  | 25.43  | 8.57   | 24.11  | 2.8    | 13.6   | -2.46  | 4.25   | 0.0137 | 0.0000 | -5.0525  | 5.0525  | 0.0000 |  |
|          |        |           |          | 457    | 154 | 611 | 457.00 | 154.00 | 263.82 | 100.00 | 100.00 | SS     | 263.82 |        |        |          |         |        |  |
|          |        |           |          | 0.337  |     |     |        |        |        |        |        |        |        |        |        |          |         |        |  |
| OGO      | F23M22 | Sig & Res | Sig      | 22     | 1   | 23  |        |        |        |        |        |        |        |        |        |          |         |        |  |
| OGO      | F23M23 | Sig & Res | Stress   | 26     | 0   | 26  |        |        |        |        |        |        |        |        |        |          |         |        |  |
| OGO      | F23M23 | Metab     | Bioen    | 30     | 1   | 31  |        |        |        |        |        |        |        |        |        |          |         |        |  |
| OGO      | F23M23 | Metab     | Photosyn | 21     | 0   | 21  |        |        |        |        |        |        |        |        |        |          |         |        |  |
| OGO      | F23M23 | Metab     | Metab    | 72     | 7   | 79  |        |        |        |        |        |        |        |        |        |          |         |        |  |
| OGO      | F23M23 | Metab     | Catab    | 8      | 0   | 8   |        |        |        |        |        |        |        |        |        |          |         |        |  |
| OGO      | F23M23 | Metab     | Transp   | 36     | 0   | 36  |        |        |        |        |        |        |        |        |        |          |         |        |  |
| OGO      | F23M23 | Reg       | Reg      | -3     | 0   | -3  |        |        |        |        |        |        |        |        |        |          |         |        |  |
| OGO      | F23M23 | Reg       | Prot mod | 3      | 0   | 3   |        |        |        |        |        |        |        |        |        |          |         |        |  |
| OGO      | F23M23 | Reg       | Transcri | -5     | 0   | -5  |        |        |        |        |        |        |        |        |        |          |         |        |  |
| OGO      | F23M23 | Reg       | Transla  | 1      | 0   | 1   |        |        |        |        |        |        |        |        |        |          |         |        |  |
| OGO      | F23M23 | Devel     | Devel    | 41     | 18  | 59  |        |        |        |        |        |        |        |        |        |          |         |        |  |
| OGO      | F23M23 | Devel     | Cell div | 6      | 3   | 9   |        |        |        |        |        |        |        |        |        |          |         |        |  |
|          |        |           |          | 236    | 29  | 265 | 0      |        |        |        |        |        |        |        |        |          |         |        |  |
|          |        |           |          | 0.1229 |     |     |        |        |        |        |        |        |        |        |        |          |         |        |  |
| Adjusted |        |           |          |        |     |     |        |        |        |        |        |        |        |        |        |          |         |        |  |
| OGO      | F23M22 | Sig & Res | Sig      | 22     | 1   | 23  | 21.77  | 3.11   | 1.43   | 8.3    | 2.6    | 0.05   | -1.20  | 0.9611 | 0.2315 | 0.2205   | -1.3429 | 0.8255 |  |
| OGO      | F23M23 | Sig & Res | Stress   | 26     | 0   | 26  | 24.61  | 3.52   | 3.59   | 9.8    | 0.0    | 0.28   | -1.88  | 0.7797 | 0.0608 | 1.2711   | -2.1167 | 0.2037 |  |
| OGO      | F23M23 | Metab     | Bioen    | 30     | 1   | 31  | 29.35  | 4.19   | 2.45   | 11.3   | 2.6    | 0.12   | -1.56  | 0.9038 | 0.1190 | 0.5547   | -1.7775 | 0.5791 |  |
| OGO      | F23M23 | Metab     | Photosyn | 21     | 0   | 21  | 19.88  | 2.84   | 2.90   | 7.9    | 0.0    | 0.25   | -1.69  | 0.8015 | 0.0920 | 1.1313   | -1.8839 | 0.2579 |  |
| OGO      | F23M23 | Metab     | Metab    | 72     | 7   | 79  | 74.78  | 10.68  | 1.37   | 27.1   | 18.4   | -0.32  | -1.13  | 0.7476 | 0.2598 | -1.6428  | -1.4293 | 0.1004 |  |
| OGO      | F23M23 | Metab     | Catab    | 8      | 0   | 8   | 7.57   | 1.08   | 1.11   | 3.0    | 0.0    | 0.16   | -1.04  | 0.8767 | 0.2983 | 0.6814   | -1.1348 | 0.4956 |  |
| OGO      | F23M23 | Metab     | Transp   | 36     | 0   | 36  | 34.08  | 4.87   | 4.98   | 13.5   | 0.0    | 0.33   | -2.21  | 0.7420 | 0.0274 | 1.5259   | -2.5410 | 0.1270 |  |
| OGO      | F23M23 | Reg       | Reg      | 0      | 3   | 3   | 2.84   | 0.41   | 19.43  | 0.0    | 7.9    | -1.69  | 4.07   | 0.0920 | 0.0000 | -7.3331  | 4.4035  | 0.0000 |  |
| OGO      | F23M23 | Reg       | Prot mod | 3      | 0   | 3   | 2.84   | 0.41   | 0.41   | 1.1    | 0.0    | 0.10   | -0.64  | 0.9243 | 0.5242 | 0.4135   | -0.6886 | 0.6792 |  |
| OGO      | F23M23 | Reg       | Transcri | 0      | 5   | 5   | 4.73   | 0.68   | 32.38  | 0.0    | 13.2   | -2.18  | 5.26   | 0.0296 | 0.0000 | -9.5012  | 5.7055  | 0.0000 |  |
| OGO      | F23M23 | Reg       | Transla  | 1      | 0   | 1   | 0.95   | 0.14   | 0.14   | 0.4    | 0.0    | 0.05   | -0.37  | 0.9562 | 0.7131 | 0.2379   | -0.3962 | 0.8120 |  |
| OGO      | F23M23 | Devel     | Devel    | 41     | 18  | 59  | 55.85  | 7.98   | 16.54  | 15.4   | 47.4   | -1.99  | 3.55   | 0.0469 | 0.0004 | -9.6764  | 4.2923  | 0.0000 |  |
| OGO      | F23M23 | Devel     | Cell div | 6      | 3   | 9   | 8.52   | 1.22   | 3.36   | 2.3    | 7.9    | -0.86  | 1.62   | 0.3880 | 0.1061 | -3.7975  | 1.7664  | 0.0001 |  |
|          |        |           |          | 266    | 38  | 281 | 0      | 266.00 | 38.00  | 90.09  | 100.00 | 100.00 | SS     | 90.09  |        |          |         |        |  |
| OGO      | L23S23 | Sig & Res | Sig      |        |     |     |        |        |        |        |        |        |        |        |        |          |         |        |  |
| OGO      | L23S23 | Sig & Res | Stress   |        |     |     |        |        |        |        |        |        |        |        |        |          |         |        |  |
| OGO      | L23S23 | Metab     | Bioen    | 0      | 14  | 14  | 0.49   | 13.51  | 0.51   | 0.0    | 25.5   | -0.70  | 0.13   | 0.4834 | 0.8937 | -0.8264  | 0.8264  | 0.4086 |  |
| OGO      | L23S23 | Metab     | Photosyn |        |     |     |        |        |        |        |        |        |        |        |        |          |         |        |  |
| OGO      | L23S23 | Metab     | Metab    | 1      | 11  | 11  | 0.39   | 10.61  | 0.99   | 50.0   | 20.0   | 0.99   | 0.12   | 0.3230 | 0.9057 | 1.1249   | 0.7071  | 0.2606 |  |
| OGO      | L23S23 | Metab     | Catab    | 0      | 1   | 1   | 0.04   | 0.96   | 0.04   | 0.0    | 1.8    | -0.19  | 0.04   | 0.8514 | 0.9715 | -0.1925  | 0.1925  | 0.8474 |  |
| OGO      | L23S23 | Metab     | Transp   | 0      | 18  | 18  | 0.63   | 17.37  | 0.65   | 0.0    | 32.7   | -0.79  | 0.15   | 0.4268 | 0.8795 | -0.9864  | 0.9864  | 0.3239 |  |
| OGO      | L23S23 | Reg       | Reg      |        |     |     |        |        |        |        |        |        |        |        |        |          |         |        |  |
| OGO      | L23S23 | Reg       | Prot mod |        |     |     |        |        |        |        |        |        |        |        |        |          |         |        |  |
| OGO      | L23S23 | Reg       | Transcri | 0      | 1   | 1   | 0.04   | 0.96   | 0.04   | 0.0    | 1.8    | -0.19  | 0.04   | 0.8514 | 0.9715 | -0.1925  | 0.1925  | 0.8474 |  |
| OGO      | L23S23 | Reg       | Transla  |        |     |     |        |        |        |        |        |        |        |        |        |          |         |        |  |
| OGO      | L23S23 | Devel     | Devel    | 1      | 10  | 10  | 0.35   | 9.65   | 1.21   | 50.0   | 18.2   | 1.10   | 0.11   | 0.2731 | 0.9101 | 1.2333   | 0.6667  | 0.2175 |  |
| OGO      | L23S23 | Devel     | Cell div | 0      | 0   | 0   | 0.00   | 0.00   |        |        |        |        |        |        |        |          |         |        |  |
|          |        |           |          | 2      | 55  | 57  | 1.93   | 53.07  | 3.44   | 100.00 | 100.00 | SS     | 3.44   |        |        |          |         |        |  |
| OGO      | M23S23 | Sig & Res | Sig      |        |     |     |        |        |        |        |        |        |        |        |        |          |         |        |  |
| OGO      | M23S23 | Sig & Res | Stress   |        |     |     |        |        |        |        |        |        |        |        |        |          |         |        |  |
| OGO      | M23S23 | Metab     | Bioen    | 0      | 1   | 1   | 0.17   | 0.83   | 0.21   | 0.0    | 5.3    | -0.42  | 0.19   | 0.6767 | 0.8483 | -0.4691  | 0.4691  | 0.6390 |  |
| OGO      | M23S23 | Metab     | Photosyn |        |     |     |        |        |        |        |        |        |        |        |        |          |         |        |  |
| OGO      | M23S23 | Metab     | Metab    | 3      | 5   | 8   | 1.39   | 6.61   | 2.25   | 75.0   | 26.3   | 1.36   | -0.63  | 0.1726 | 0.5315 | 1.8581   | -1.8581 | 0.0632 |  |
| OGO      | M23S23 | Metab     | Catab    |        |     |     |        |        |        |        |        |        |        |        |        |          |         |        |  |
| OGO      | M23S23 | Metab     | Transp   |        |     |     |        |        |        |        |        |        |        |        |        |          |         |        |  |
| OGO      | M23S23 | Reg       | Reg      |        |     |     |        |        |        |        |        |        |        |        |        |          |         |        |  |
| OGO      | M23S23 | Reg       | Prot mod |        |     |     |        |        |        |        |        |        |        |        |        |          |         |        |  |
| OGO      | M23S23 | Reg       | Transcri |        |     |     |        |        |        |        |        |        |        |        |        |          |         |        |  |
| OGO      | M23S23 | Reg       | Transla  | 0      | 7   | 7   | 1.22   | 5.78   | 1.47   | 0.0    | 36.8   | -1.10  | 0.51   | 0.2699 | 0.6127 | -1.4555  | 1.4555  | 0.1455 |  |
| OGO      | M23S23 | Devel     | Devel    | 1      | 6   | 7   | 1.22   | 5.78   | 0.05   | 25.0   | 31.6   | -0.20  | 0.09   | 0.8438 | 0.9280 | -0.2599  | 0.2599  | 0.7949 |  |

| OGO      | M23S23   | Devel     | Cell div | 4    | 19   | 23   | 4.00    | 19.00   | 3.98   | 100.00 | 100.00 | SS    | 3.98   |        |        |          |         |        |
|----------|----------|-----------|----------|------|------|------|---------|---------|--------|--------|--------|-------|--------|--------|--------|----------|---------|--------|
| OGO      | F23S23   | Sig & Res | Sig      | 34   | 3    | 37   |         |         |        |        |        |       |        |        |        |          |         |        |
| OGO      | F23S23   | Sig & Res | Stress   | 45   | 2    | 47   |         |         |        |        |        |       |        |        |        |          |         |        |
| OGO      | F23S23   | Metab     | Bioen    | 73   | 18   | 91   |         |         |        |        |        |       |        |        |        |          |         |        |
| OGO      | F23S23   | Metab     | Photosyn | 32   | 3    | 35   |         |         |        |        |        |       |        |        |        |          |         |        |
| OGO      | F23S23   | Metab     | Metab    | 158  | 42   | 200  |         |         |        |        |        |       |        |        |        |          |         |        |
| OGO      | F23S23   | Metab     | Catab    | 29   | 1    | 30   |         |         |        |        |        |       |        |        |        |          |         |        |
| OGO      | F23S23   | Metab     | Transp   | 51   | 3    | 54   |         |         |        |        |        |       |        |        |        |          |         |        |
| OGO      | F23S23   | Reg       | Reg      | -5   | 8    | 3    |         |         |        |        |        |       |        |        |        |          |         |        |
| OGO      | F23S23   | Reg       | Prot mod | 4    | 4    | 8    |         |         |        |        |        |       |        |        |        |          |         |        |
| OGO      | F23S23   | Reg       | Transcri | -9   | 8    | -1   |         |         |        |        |        |       |        |        |        |          |         |        |
| OGO      | F23S23   | Reg       | Transla  | -4   | 57   | 53   |         |         |        |        |        |       |        |        |        |          |         |        |
| OGO      | F23S23   | Devel     | Devel    | 57   | 97   | 154  |         |         |        |        |        |       |        |        |        |          |         |        |
| OGO      | F23S23   | Devel     | Cell div | 8    | 24   | 32   |         |         |        |        |        |       |        |        |        |          |         |        |
| Adjusted |          |           |          | 473  | 270  | 743  |         |         |        |        |        |       |        |        |        |          |         |        |
| OGO      | F23S23   | Sig & Res | Sig      | 34   | 3    | 37   | 23.32   | 13.68   | 13.23  | 6.9    | 1.0    | 2.21  | -2.89  | 0.0270 | 0.0039 | 3.7265   | -3.7265 | 0.0002 |
| OGO      | F23S23   | Sig & Res | Stress   | 45   | 2    | 47   | 29.62   | 17.38   | 21.59  | 9.2    | 0.7    | 2.83  | -3.69  | 0.0047 | 0.0002 | 4.7930   | -4.7930 | 0.0000 |
| OGO      | F23S23   | Metab     | Bioen    | 73   | 18   | 91   | 57.36   | 33.64   | 11.54  | 14.9   | 6.3    | 2.07  | -2.70  | 0.0389 | 0.0070 | 3.6147   | -3.6147 | 0.0003 |
| OGO      | F23S23   | Metab     | Photosyn | 32   | 3    | 35   | 22.06   | 12.94   | 12.11  | 6.5    | 1.0    | 2.12  | -2.76  | 0.0343 | 0.0057 | 3.5614   | -3.5614 | 0.0004 |
| OGO      | F23S23   | Metab     | Metab    | 158  | 42   | 200  | 126.06  | 73.94   | 21.89  | 32.2   | 14.6   | 2.84  | -3.71  | 0.0044 | 0.0002 | 5.4270   | -5.4270 | 0.0000 |
| OGO      | F23S23   | Metab     | Catab    | 29   | 1    | 30   | 18.91   | 11.09   | 14.57  | 5.9    | 0.3    | 2.32  | -3.03  | 0.0203 | 0.0024 | 3.8923   | -3.8923 | 0.0001 |
| OGO      | F23S23   | Metab     | Transp   | 51   | 3    | 54   | 34.04   | 19.96   | 22.87  | 10.4   | 1.0    | 2.91  | -3.80  | 0.0036 | 0.0001 | 4.9572   | -4.9572 | 0.0000 |
| OGO      | F23S23   | Reg       | Reg      | 0    | 13   | 13   | 8.19    | 4.81    | 22.16  | 0.0    | 4.5    | -2.86 | 3.74   | 0.0042 | 0.0002 | -4.7476  | 4.7476  | 0.0000 |
| OGO      | F23S23   | Reg       | Prot mod | 4    | 4    | 8    | 5.04    | 2.96    | 0.58   | 0.8    | 1.4    | -0.46 | 0.61   | 0.6425 | 0.5444 | -0.7674  | 0.7674  | 0.4429 |
| OGO      | F23S23   | Reg       | Transcri | 0    | 17   | 17   | 10.72   | 6.28    | 28.98  | 0.0    | 5.9    | -3.27 | 4.27   | 0.0011 | 0.0000 | -5.4433  | 5.4433  | 0.0000 |
| OGO      | F23S23   | Reg       | Transla  | 0    | 61   | 61   | 38.45   | 22.55   | 104.00 | 0.0    | 21.2   | -6.20 | 8.10   | 0.0000 | 0.0000 | -10.6222 | 10.6222 | 0.0000 |
| OGO      | F23S23   | Devel     | Devel    | 57   | 97   | 154  | 97.07   | 56.93   | 44.73  | 11.6   | 33.7   | -4.07 | 5.31   | 0.0000 | 0.0000 | -7.4669  | 7.4669  | 0.0000 |
| OGO      | F23S23   | Devel     | Cell div | 8    | 24   | 32   | 20.17   | 11.83   | 19.86  | 1.6    | 8.3    | -2.71 | 3.54   | 0.0067 | 0.0004 | -4.5510  | 4.5510  | 0.0000 |
|          |          |           |          | 491  | 288  | 779  | 491.00  | 288.00  | 338.11 | 100.00 | 100.00 | SS    | 338.11 |        |        |          |         |        |
| All GO   | L123M123 | Sig & Res | Sig      | 63   | 60   | 123  | 62.38   | 60.62   | 0.01   | 5.7    | 5.6    | 0.08  | -0.08  | 0.9376 | 0.9367 | 0.1149   | -0.1149 | 0.9085 |
| All GO   | L123M123 | Sig & Res | Stress   | 79   | 88   | 167  | 84.70   | 82.30   | 0.78   | 7.2    | 8.3    | -0.62 | 0.63   | 0.5359 | 0.5300 | -0.9179  | 0.9179  | 0.3587 |
| All GO   | L123M123 | Metab     | Bioen    | 73   | 92   | 165  | 83.68   | 81.32   | 2.77   | 6.7    | 8.6    | -1.17 | 1.18   | 0.2429 | 0.2362 | -1.7307  | 1.7307  | 0.0835 |
| All GO   | L123M123 | Metab     | Photosyn | 110  | 101  | 211  | 107.01  | 103.99  | 0.17   | 10.0   | 9.5    | 0.29  | -0.29  | 0.7727 | 0.7695 | 0.4331   | -0.4331 | 0.6649 |
| All GO   | L123M123 | Metab     | Metab    | 230  | 199  | 429  | 217.57  | 211.43  | 1.44   | 21.0   | 18.7   | 0.84  | -0.85  | 0.3996 | 0.3928 | 1.3402   | -1.3402 | 0.1802 |
| All GO   | L123M123 | Metab     | Catab    | 51   | 21   | 72   | 36.52   | 35.48   | 11.66  | 4.6    | 2.0    | 2.40  | -2.43  | 0.0165 | 0.0150 | 3.4726   | -3.4726 | 0.0005 |
| All GO   | L123M123 | Metab     | Transp   | 74   | 66   | 140  | 71.00   | 69.00   | 0.26   | 6.7    | 6.2    | 0.36  | -0.36  | 0.7221 | 0.7183 | 0.5238   | -0.5238 | 0.6004 |
| All GO   | L123M123 | Reg       | Reg      | 5    | 6    | 11   | 5.58    | 5.42    | 0.12   | 0.5    | 0.6    | -0.25 | 0.25   | 0.8064 | 0.8037 | -0.3500  | 0.3500  | 0.7264 |
| All GO   | L123M123 | Reg       | Prot mod | 40   | 47   | 87   | 44.12   | 42.88   | 0.78   | 3.6    | 4.4    | -0.62 | 0.63   | 0.5348 | 0.5289 | -0.9026  | 0.9026  | 0.3667 |
| All GO   | L123M123 | Reg       | Transcri | 26   | 23   | 49   | 24.85   | 24.15   | 0.11   | 2.4    | 2.2    | 0.23  | -0.23  | 0.8177 | 0.8151 | 0.3321   | -0.3321 | 0.7398 |
| All GO   | L123M123 | Reg       | Transla  | 30   | 32   | 62   | 31.44   | 30.56   | 0.13   | 2.7    | 3.0    | -0.26 | 0.26   | 0.7967 | 0.7939 | -0.3723  | 0.3723  | 0.7097 |
| All GO   | L123M123 | Devel     | Devel    | 281  | 279  | 560  | 284.01  | 275.99  | 0.06   | 25.6   | 26.2   | -0.18 | 0.18   | 0.8581 | 0.8561 | -0.2958  | 0.2958  | 0.7674 |
| All GO   | L123M123 | Devel     | Cell div | 35   | 52   | 87   | 44.12   | 42.88   | 3.83   | 3.2    | 4.9    | -1.37 | 1.39   | 0.1696 | 0.1635 | -1.9970  | 1.9970  | 0.0458 |
|          |          |           |          | 1097 | 1066 | 2163 | 1097.00 | 1066.00 | 22.12  | 100.00 | 100.00 | SS    | 22.12  |        |        |          |         |        |
| All GO   | L4M4     | Sig & Res | Sig      | 116  | 239  | 355  | 138.84  | 216.16  | 6.17   | 6.0    | 7.9    | -1.94 | 1.55   | 0.0526 | 0.1204 | -2.5771  | 2.5771  | 0.0100 |
| All GO   | L4M4     | Sig & Res | Stress   | 165  | 256  | 421  | 164.65  | 256.35  | 0.00   | 8.5    | 8.4    | 0.03  | -0.02  | 0.9781 | 0.9824 | 0.0368   | -0.0368 | 0.9706 |
| All GO   | L4M4     | Metab     | Bioen    | 129  | 199  | 328  | 128.28  | 199.72  | 0.01   | 6.6    | 6.6    | 0.06  | -0.05  | 0.9490 | 0.9592 | 0.0847   | -0.0847 | 0.9325 |
| All GO   | L4M4     | Metab     | Photosyn | 188  | 287  | 475  | 185.77  | 289.23  | 0.04   | 9.7    | 9.5    | 0.16  | -0.13  | 0.8698 | 0.8955 | 0.2209   | -0.2209 | 0.8252 |
| All GO   | L4M4     | Metab     | Metab    | 402  | 560  | 962  | 376.22  | 585.78  | 2.90   | 20.6   | 18.5   | 1.33  | -1.06  | 0.1839 | 0.2869 | 1.8958   | -1.8958 | 0.0580 |
| All GO   | L4M4     | Metab     | Catab    | 89   | 147  | 236  | 92.30   | 143.70  | 0.19   | 4.6    | 4.8    | -0.34 | 0.27   | 0.7315 | 0.7833 | -0.4505  | 0.4505  | 0.6523 |
| All GO   | L4M4     | Metab     | Transp   | 112  | 218  | 330  | 129.06  | 200.94  | 3.70   | 5.7    | 7.2    | -1.50 | 1.20   | 0.1332 | 0.2288 | -1.9914  | 1.9914  | 0.0464 |
| All GO   | L4M4     | Reg       | Reg      | 8    | 23   | 31   | 12.12   | 18.88   | 2.30   | 0.4    | 0.8    | -1.18 | 0.95   | 0.2363 | 0.3426 | -1.5225  | 1.5225  | 0.1279 |
| All GO   | L4M4     | Reg       | Prot mod | 57   | 85   | 142  | 55.53   | 86.47   | 0.06   | 2.9    | 2.8    | 0.20  | -0.16  | 0.8441 | 0.8747 | 0.2557   | -0.2557 | 0.7982 |
| All GO   | L4M4     | Reg       | Transcri | 71   | 80   | 151  | 59.05   | 91.95   | 3.97   | 3.6    | 2.6    | 1.55  | -1.25  | 0.1201 | 0.2128 | 2.0230   | -2.0230 | 0.0431 |
| All GO   | L4M4     | Reg       | Transla  | 56   | 126  | 182  | 71.18   | 110.82  | 5.32   | 2.9    | 4.2    | -1.80 | 1.44   | 0.0720 | 0.1494 | -2.3488  | 2.3488  | 0.0188 |
| All GO   | L4M4     | Devel     | Devel    | 526  | 762  | 1288 | 503.72  | 784.28  | 1.62   | 27.0   | 25.1   | 0.99  | -0.80  | 0.3208 | 0.4263 | 1.4775   | -1.4775 | 0.1395 |
| All GO   | L4M4     | Devel     | Cell div | 29   | 51   | 80   | 31.29   | 48.71   | 0.27   | 1.5    | 1.7    | -0.41 | 0.33   | 0.6826 | 0.7432 | -0.5282  | 0.5282  | 0.5974 |
|          |          |           |          | 1948 | 3033 | 4981 | 1948.00 | 3033.00 | 26.56  | 100.00 | 100.00 | SS    | 26.56  |        |        |          |         |        |

|        |        |           |          |      |      |       |         |         |        |        |        |        |        |        |        |          |          |        |
|--------|--------|-----------|----------|------|------|-------|---------|---------|--------|--------|--------|--------|--------|--------|--------|----------|----------|--------|
| All GO | F23L23 | Sig & Res | Sig      | 746  | 234  | 980   | 692.66  | 287.34  | 14.01  | 8.1    | 6.1    | 2.03   | -3.15  | 0.0427 | 0.0017 | 3.8912   | -3.8912  | 0.0001 |
| All GO | F23L23 | Sig & Res | Stress   | 872  | 207  | 1079  | 762.64  | 316.36  | 53.49  | 9.4    | 5.4    | 3.96   | -6.15  | 0.0001 | 0.0000 | 7.6351   | -7.6351  | 0.0000 |
| All GO | F23L23 | Metab     | Bioen    | 701  | 162  | 863   | 609.97  | 253.03  | 46.34  | 7.6    | 4.2    | 3.69   | -5.72  | 0.0002 | 0.0000 | 7.0432   | -7.0432  | 0.0000 |
| All GO | F23L23 | Metab     | Photosyn | 908  | 236  | 1144  | 808.58  | 335.42  | 41.69  | 9.8    | 6.1    | 3.50   | -5.43  | 0.0005 | 0.0000 | 6.7592   | -6.7592  | 0.0000 |
| All GO | F23L23 | Metab     | Metab    | 1974 | 678  | 2652  | 1874.43 | 777.57  | 18.04  | 21.3   | 17.7   | 2.30   | -3.57  | 0.0215 | 0.0004 | 4.7563   | -4.7563  | 0.0000 |
| All GO | F23L23 | Metab     | Catab    | 288  | 132  | 420   | 296.86  | 123.14  | 0.90   | 3.1    | 3.4    | -0.51  | 0.80   | 0.6073 | 0.4249 | -0.9648  | 0.9648   | 0.3346 |
| All GO | F23L23 | Metab     | Transp   | 545  | 155  | 700   | 494.76  | 205.24  | 17.40  | 5.9    | 4.0    | 2.26   | -3.51  | 0.0239 | 0.0005 | 4.2876   | -4.2876  | 0.0000 |
| All GO | F23L23 | Reg       | Reg      | 80   | 39   | 119   | 84.11   | 34.89   | 0.68   | 0.9    | 1.0    | -0.45  | 0.70   | 0.6541 | 0.4866 | -0.8312  | 0.8312   | 0.4058 |
| All GO | F23L23 | Reg       | Prot mod | 291  | 132  | 423   | 298.98  | 124.02  | 0.73   | 3.1    | 3.4    | -0.46  | 0.72   | 0.6446 | 0.4739 | -0.8660  | 0.8660   | 0.3865 |
| All GO | F23L23 | Reg       | Transcri | 287  | 298  | 585   | 413.48  | 171.52  | 131.95 | 3.1    | 7.8    | -6.22  | 9.66   | 0.0000 | 0.0000 | -11.7526 | 11.7526  | 0.0000 |
| All GO | F23L23 | Reg       | Transla  | 105  | 279  | 384   | 271.41  | 112.59  | 347.99 | 1.1    | 7.3    | -10.10 | 15.68  | 0.0000 | 0.0000 | -18.9344 | 18.9344  | 0.0000 |
| All GO | F23L23 | Devel     | Devel    | 2368 | 1094 | 3462  | 2446.94 | #####   | 8.69   | 25.6   | 28.5   | -1.60  | 2.48   | 0.1105 | 0.0132 | -3.4363  | 3.4363   | 0.0006 |
| All GO | F23L23 | Devel     | Cell div | 87   | 192  | 279   | 197.20  | 81.80   | 210.03 | 0.9    | 5.0    | -7.85  | 12.18  | 0.0000 | 0.0000 | -14.6492 | 14.6492  | 0.0000 |
|        |        |           |          | 9252 | 3838 | 13090 | 9252.00 | 3838.00 | 891.93 | 100.00 | 100.00 | SS     | 891.93 |        |        |          |          |        |
| All GO | F23M23 | Sig & Res | Sig      | 375  | 106  | 481   | 366.53  | 114.47  | 0.82   | 7.3    | 6.6    | 0.44   | -0.79  | 0.6583 | 0.4288 | 0.9407   | -0.9407  | 0.3469 |
| All GO | F23M23 | Sig & Res | Stress   | 439  | 96   | 535   | 407.68  | 127.32  | 10.11  | 8.6    | 6.0    | 1.55   | -2.78  | 0.1209 | 0.0055 | 3.3137   | -3.3137  | 0.0009 |
| All GO | F23M23 | Metab     | Bioen    | 363  | 85   | 448   | 341.39  | 106.61  | 5.75   | 7.1    | 5.3    | 1.17   | -2.09  | 0.2421 | 0.0363 | 2.4818   | -2.4818  | 0.0131 |
| All GO | F23M23 | Metab     | Photosyn | 503  | 63   | 566   | 431.31  | 134.69  | 50.08  | 9.8    | 3.9    | 3.45   | -6.18  | 0.0006 | 0.0000 | 7.3940   | -7.3940  | 0.0000 |
| All GO | F23M23 | Metab     | Metab    | 1142 | 287  | 1429  | 1088.93 | 340.07  | 10.87  | 22.2   | 17.9   | 1.61   | -2.88  | 0.1078 | 0.0040 | 3.7139   | -3.7139  | 0.0002 |
| All GO | F23M23 | Metab     | Catab    | 145  | 73   | 218   | 166.12  | 51.88   | 11.28  | 2.8    | 4.6    | -1.64  | 2.93   | 0.1013 | 0.0034 | -3.4150  | 3.4150   | 0.0006 |
| All GO | F23M23 | Metab     | Transp   | 340  | 61   | 401   | 305.57  | 95.43   | 16.30  | 6.6    | 3.8    | 1.97   | -3.52  | 0.0489 | 0.0004 | 4.1631   | -4.1631  | 0.0000 |
| All GO | F23M23 | Reg       | Reg      | 31   | 15   | 46    | 35.05   | 10.95   | 1.97   | 0.6    | 0.9    | -0.68  | 1.23   | 0.4936 | 0.2206 | -1.4082  | 1.4082   | 0.1591 |
| All GO | F23M23 | Reg       | Prot mod | 162  | 52   | 214   | 163.07  | 50.93   | 0.03   | 3.2    | 3.2    | -0.08  | 0.15   | 0.9330 | 0.8804 | -0.1751  | 0.1751   | 0.8610 |
| All GO | F23M23 | Reg       | Transcri | 128  | 133  | 261   | 198.89  | 62.11   | 106.17 | 2.5    | 8.3    | -5.03  | 8.99   | 0.0000 | 0.0000 | -10.5096 | 10.5096  | 0.0000 |
| All GO | F23M23 | Reg       | Transla  | 72   | 62   | 134   | 102.11  | 31.89   | 37.31  | 1.4    | 3.9    | -2.98  | 5.33   | 0.0029 | 0.0000 | -6.1701  | 6.1701   | 0.0000 |
| All GO | F23M23 | Devel     | Devel    | 1386 | 452  | 1838  | 1400.60 | 437.40  | 0.64   | 27.0   | 28.2   | -0.39  | 0.70   | 0.6964 | 0.4851 | -0.9379  | 0.9379   | 0.3483 |
| All GO | F23M23 | Devel     | Cell div | 47   | 118  | 165   | 125.73  | 39.27   | 207.18 | 0.9    | 7.4    | -7.02  | 12.56  | 0.0000 | 0.0000 | -14.5732 | 14.5732  | 0.0000 |
|        |        |           |          | 5133 | 1603 | 6736  | 5133.00 | 1603.00 | 458.51 | 100.00 | 100.00 | SS     | 458.51 |        |        |          |          |        |
| All GO | L23S23 | Sig & Res | Sig      | 39   | 85   | 124   | 39.64   | 84.36   | 0.02   | 5.5    | 5.7    | -0.10  | 0.07   | 0.9188 | 0.9443 | -0.1272  | 0.1272   | 0.8988 |
| All GO | L23S23 | Sig & Res | Stress   | 48   | 89   | 137   | 43.80   | 93.20   | 0.59   | 6.8    | 5.9    | 0.63   | -0.44  | 0.5254 | 0.6634 | 0.7950   | -0.7950  | 0.4266 |
| All GO | L23S23 | Metab     | Bioen    | 66   | 111  | 177   | 56.59   | 120.41  | 2.30   | 9.4    | 7.4    | 1.25   | -0.86  | 0.2107 | 0.3909 | 1.5824   | -1.5824  | 0.1136 |
| All GO | L23S23 | Metab     | Photosyn | 106  | 105  | 211   | 67.45   | 143.55  | 32.38  | 15.1   | 7.0    | 4.69   | -3.22  | 0.0000 | 0.0013 | 5.9843   | -5.9843  | 0.0000 |
| All GO | L23S23 | Metab     | Metab    | 136  | 256  | 392   | 125.32  | 266.68  | 1.34   | 19.3   | 17.1   | 0.95   | -0.65  | 0.3400 | 0.5131 | 1.2761   | -1.2761  | 0.2019 |
| All GO | L23S23 | Metab     | Catab    | 30   | 29   | 59    | 18.86   | 40.14   | 9.67   | 4.3    | 1.9    | 2.56   | -1.76  | 0.0103 | 0.0787 | 3.1519   | -3.1519  | 0.0016 |
| All GO | L23S23 | Metab     | Transp   | 40   | 77   | 117   | 37.40   | 79.60   | 0.26   | 5.7    | 5.1    | 0.42   | -0.29  | 0.6712 | 0.7711 | 0.5289   | -0.5289  | 0.5969 |
| All GO | L23S23 | Reg       | Reg      | 3    | 18   | 21    | 6.71    | 14.29   | 3.02   | 0.4    | 1.2    | -1.43  | 0.98   | 0.1518 | 0.3259 | -1.7460  | 1.7460   | 0.0808 |
| All GO | L23S23 | Reg       | Prot mod | 28   | 45   | 73    | 23.34   | 49.66   | 1.37   | 4.0    | 3.0    | 0.97   | -0.66  | 0.3345 | 0.5082 | 1.1901   | -1.1901  | 0.2340 |
| All GO | L23S23 | Reg       | Transcri | 22   | 79   | 101   | 32.29   | 68.71   | 4.82   | 3.1    | 5.3    | -1.81  | 1.24   | 0.0702 | 0.2145 | -2.2475  | 2.2475   | 0.0246 |
| All GO | L23S23 | Reg       | Transla  | 10   | 130  | 140   | 44.76   | 95.24   | 39.67  | 1.4    | 8.7    | -5.20  | 3.56   | 0.0000 | 0.0004 | -6.5094  | 6.5094   | 0.0000 |
| All GO | L23S23 | Devel     | Devel    | 163  | 452  | 615   | 196.61  | 418.39  | 8.45   | 23.2   | 30.2   | -2.40  | 1.64   | 0.0165 | 0.1004 | -3.4241  | 3.4241   | 0.0006 |
| All GO | L23S23 | Devel     | Cell div | 12   | 20   | 32    | 10.23   | 21.77   | 0.45   | 1.7    | 1.3    | 0.55   | -0.38  | 0.5800 | 0.7044 | 0.6758   | -0.6758  | 0.4991 |
|        |        |           |          | 703  | 1496 | 2199  | 703.00  | 1496.00 | 104.34 | 100.00 | 100.00 | SS     | 104.34 |        |        |          |          |        |
| All GO | M23S23 | Sig & Res | Sig      | 36   | 85   | 121   | 40.15   | 80.85   | 0.64   | 5.5    | 6.5    | -0.65  | 0.46   | 0.5126 | 0.6445 | -0.8268  | 0.8268   | 0.4083 |
| All GO | M23S23 | Sig & Res | Stress   | 72   | 89   | 161   | 53.42   | 107.58  | 9.67   | 11.0   | 6.8    | 2.54   | -1.79  | 0.0110 | 0.0732 | 3.2455   | -3.2455  | 0.0012 |
| All GO | M23S23 | Metab     | Bioen    | 47   | 84   | 131   | 43.47   | 87.53   | 0.43   | 7.2    | 6.4    | 0.54   | -0.38  | 0.5920 | 0.7057 | 0.6786   | -0.6786  | 0.4974 |
| All GO | M23S23 | Metab     | Photosyn | 67   | 86   | 153   | 50.77   | 102.23  | 7.77   | 10.3   | 6.5    | 2.28   | -1.61  | 0.0227 | 0.1084 | 2.9025   | -2.9025  | 0.0037 |
| All GO | M23S23 | Metab     | Metab    | 130  | 254  | 384   | 127.41  | 256.59  | 0.08   | 19.9   | 19.3   | 0.23   | -0.16  | 0.8188 | 0.8717 | 0.3125   | -0.3125  | 0.7547 |
| All GO | M23S23 | Metab     | Catab    | 19   | 41   | 60    | 19.91   | 40.09   | 0.06   | 2.9    | 3.1    | -0.20  | 0.14   | 0.8387 | 0.8859 | -0.2530  | 0.2530   | 0.8003 |
| All GO | M23S23 | Metab     | Transp   | 29   | 60   | 89    | 29.53   | 59.47   | 0.01   | 4.4    | 4.6    | -0.10  | 0.07   | 0.9222 | 0.9451 | -0.1223  | 0.1223   | 0.9027 |
| All GO | M23S23 | Reg       | Reg      | 3    | 15   | 18    | 5.97    | 12.03   | 2.21   | 0.5    | 1.1    | -1.22  | 0.86   | 0.2239 | 0.3914 | -1.4948  | 1.4948   | 0.1350 |
| All GO | M23S23 | Reg       | Prot mod | 37   | 38   | 75    | 24.89   | 50.11   | 8.83   | 5.7    | 2.9    | 2.43   | -1.71  | 0.0152 | 0.0870 | 3.0292   | -3.0292  | 0.0025 |
| All GO | M23S23 | Reg       | Transcri | 27   | 86   | 113   | 37.49   | 75.51   | 4.40   | 4.1    | 6.5    | -1.71  | 1.21   | 0.0866 | 0.2272 | -2.1596  | 2.1596   | 0.0308 |
| All GO | M23S23 | Reg       | Transla  | 13   | 61   | 74    | 24.55   | 49.45   | 8.14   | 2.0    | 4.6    | -2.33  | 1.64   | 0.0197 | 0.1004 | -2.9077  | 2.9077   | 0.0036 |
| All GO | M23S23 | Devel     | Devel    | 147  | 390  | 537   | 178.18  | 358.82  | 8.17   | 22.5   | 29.7   | -2.34  | 1.65   | 0.0195 | 0.0998 | -3.3521  | 3.3521   | 0.0008 |
| All GO | M23S23 | Devel     | Cell div | 25   | 24   | 49    | 16.26   | 32.74   | 7.03   | 3.8    | 1.8    | 2.17   | -1.53  | 0.0302 | 0.1266 | 2.6858   | -2.6858  | 0.0072 |
|        |        |           |          | 652  | 1313 | 1965  | 652.00  | 1313.00 | 57.44  | 100.00 | 100.00 | SS     | 57.44  |        |        |          |          |        |
| All GO | F23S23 | Sig & Res | Sig      | 798  | 506  | 1304  | 739.81  | 564.19  | 10.58  | 7.2    | 6.0    | 2.14   | -2.45  | 0.0324 | 0.0143 | 3.3666   | -3.3666  | 0.0008 |
| All GO | F23S23 | Sig & Res | Stress   | 943  | 425  | 1368  | 776.12  | 591.88  | 82.94  | 8.5    | 5.0    | 5.99   | -6.86  | 0.0000 | 0.0000 | 9.4427   | -9.4427  | 0.0000 |
| All GO | F23S23 | Metab     | Bioen    | 881  | 387  | 1268  | 719.38  | 548.62  | 83.92  | 7.9    | 4.6    | 6.03   | -6.90  | 0.0000 | 0.0000 | 9.4725   | -9.4725  | 0.0000 |
| All GO | F23S23 | Metab     | Photosyn | 1277 | 471  | 1748  | 991.71  | 756.29  | 189.69 | 11.5   | 5.6    | 9.06   | -10.37 | 0.0000 | 0.0000 | 14.4320  | -14.4320 | 0.0000 |
| All GO | F23S23 | Metab     | Metab    | 2405 | 1343 | 3748  | 2126.38 | #####   | 84.38  | 21.6   | 15.8   | 6.04   | -6.92  | 0.0000 | 0.0000 | 10.2149  | -10.2149 | 0.0000 |

|        |        |       |          |       |      |       |          |         |         |        |        |        |         |        |        |          |         |        |
|--------|--------|-------|----------|-------|------|-------|----------|---------|---------|--------|--------|--------|---------|--------|--------|----------|---------|--------|
| All GO | F23S23 | Metab | Catab    | 440   | 254  | 694   | 393.73   | 300.27  | 12.57   | 4.0    | 3.0    | 2.33   | -2.67   | 0.0197 | 0.0076 | 3.6094   | -3.6094 | 0.0003 |
| All GO | F23S23 | Metab | Transp   | 688   | 345  | 1033  | 586.06   | 446.94  | 40.98   | 6.2    | 4.1    | 4.21   | -4.82   | 0.0000 | 0.0000 | 6.5776   | -6.5776 | 0.0000 |
| All GO | F23S23 | Reg   | Reg      | 59    | 82   | 141   | 79.99    | 61.01   | 12.74   | 0.5    | 1.0    | -2.35  | 2.69    | 0.0189 | 0.0072 | -3.5815  | 3.5815  | 0.0003 |
| All GO | F23S23 | Reg   | Prot mod | 373   | 263  | 636   | 360.83   | 275.17  | 0.95    | 3.4    | 3.1    | 0.64   | -0.73   | 0.5216 | 0.4630 | 0.9905   | -0.9905 | 0.3219 |
| All GO | F23S23 | Reg   | Transcri | 262   | 643  | 905   | 513.44   | 391.56  | 284.60  | 2.4    | 7.6    | -11.10 | 12.71   | 0.0000 | 0.0000 | -17.2737 | 17.2737 | 0.0000 |
| All GO | F23S23 | Reg   | Transla  | 134   | 846  | 980   | 555.99   | 424.01  | 740.27  | 1.2    | 10.0   | -17.90 | 20.49   | 0.0000 | 0.0000 | -27.9151 | 27.9151 | 0.0000 |
| All GO | F23S23 | Devel | Devel    | 2750  | 2489 | 5239  | 2972.28  | #####   | 38.42   | 24.7   | 29.4   | -4.08  | 4.67    | 0.0000 | 0.0000 | -7.2421  | 7.2421  | 0.0000 |
| All GO | F23S23 | Devel | Cell div | 103   | 421  | 524   | 297.28   | 226.72  | 293.46  | 0.9    | 5.0    | -11.27 | 12.90   | 0.0000 | 0.0000 | -17.3646 | 17.3646 | 0.0000 |
|        |        |       |          | 11113 | 8475 | 19588 | 11113.00 | 8475.00 | 1875.49 | 100.00 | 100.00 | SS     | 1875.49 |        |        |          |         |        |
