# Supplementary material for: Whether Gametophytes Are Reduced or Unreduced in Angiosperms Might Be Determined Metabolically
Source: MDPI journal article supplement (doi:10.3390/genes11121449), 2020-12-02
Supplement: s1 [file s1]

**Table S5.** Differentially expressed genes for 17 microarray comparisons involving ovules from facultatively aposporous *B. microphylla* Cache (M), facultatively diplosporous *B. lignifera* (L), diplosporous *B. x formosa* (FH) population, and pistils from sexual *B. stricta* (SP). Ovule stages 1-4: MMC, active meiocyte, young gametophyte, and mature gametophyte, respectively. Pistil stage 3: young gametophyte.

| Line no. | Comparison | ProbeSet      | <i>A. thaliana</i> ortholog | <i>A. thaliana</i> gene description | L1-3                                                                                                                                                                                                                                                                                                                                                                                                                          | M1-3    | Fold    | p-value | FDR      |          |
|----------|------------|---------------|-----------------------------|-------------------------------------|-------------------------------------------------------------------------------------------------------------------------------------------------------------------------------------------------------------------------------------------------------------------------------------------------------------------------------------------------------------------------------------------------------------------------------|---------|---------|---------|----------|----------|
| 1        | 1          | L1-3 vs. M1-3 | 245008_at                   | ATCG00360                           | Encodes a protein required for photosystem I assembly and stability. In <i>Chlamydomonas reinhardtii</i> , this protein seems to act as a PSI specific chaperone facilitating the assembly of the complex by interacting with PsaA and PsaD. A loss of function mutation in tobacco leads to a loss of photosystem I.                                                                                                         | 4538.94 | 169.74  | 26.74   | < 1e-07  | < 1e-07  |
| 2        | 1          | L1-3 vs. M1-3 | 257890_s_a                  | AT3G42570                           |                                                                                                                                                                                                                                                                                                                                                                                                                               | 329.68  | 32.03   | 10.29   | 4.40E-05 | 1.17E-03 |
| 3        | 1          | L1-3 vs. M1-3 | 250508_at                   | AT5G09950                           | Encodes a DYW-class PPR protein required for RNA editing at four sites in mitochondria of <i>A. thaliana</i> .                                                                                                                                                                                                                                                                                                                | 118.54  | 12.21   | 9.71    | 3.00E-07 | 4.26E-05 |
| 4        | 1          | L1-3 vs. M1-3 | 253487_at                   | AT4G31700                           | Encodes a putative ribosomal protein S6 (rps6a). RPS6A and RPS6B are fully redundant and essential during gametogenesis.                                                                                                                                                                                                                                                                                                      | 319.97  | 44.72   | 7.15    | < 1e-07  | < 1e-07  |
| 5        | 1          | L1-3 vs. M1-3 | 256243_at                   | AT3G12500                           | encodes a basic chitinase involved in ethylene/jasmonic acid mediated signalling pathway during systemic acquired resistance based on expression analyses.                                                                                                                                                                                                                                                                    | 146.13  | 21.55   | 6.78    | 8.00E-07 | 8.73E-05 |
| 6        | 1          | L1-3 vs. M1-3 | 254098_at                   | AT4G25100                           | Fe-superoxide dismutase                                                                                                                                                                                                                                                                                                                                                                                                       | 208.70  | 35.72   | 5.84    | 3.76E-04 | 5.18E-03 |
| 7        | 1          | L1-3 vs. M1-3 | 247163_at                   | AT5G65685                           | UDP-Glycosyltransferase superfamily protein;(source:Araport11)                                                                                                                                                                                                                                                                                                                                                                | 61.04   | 10.94   | 5.58    | 5.00E-07 | 5.91E-05 |
| 8        | 1          | L1-3 vs. M1-3 | 252372_at                   | AT3G48000                           | Encodes a putative (NAD+) aldehyde dehydrogenase.                                                                                                                                                                                                                                                                                                                                                                             | 149.09  | 33.39   | 4.47    | 2.87E-05 | 8.40E-04 |
| 9        | 1          | L1-3 vs. M1-3 | 245330_at                   | AT4G14930                           | Survival protein SurE-like phosphatase/nucleotidase;(source:Araport11)                                                                                                                                                                                                                                                                                                                                                        | 253.57  | 61.49   | 4.12    | 5.27E-05 | 1.36E-03 |
| 10       | 1          | L1-3 vs. M1-3 | 244971_at                   | ATCG00670                           | Encodes the only ClpP (caseinolytic protease) encoded within the plastid genome. Contains a highly conserved catalytic triad of Ser-type proteases (Ser-His-Asp). Part of the 350 kDa chloroplast Clp complex. The name reflects nomenclature described in Adam et. al (2001).                                                                                                                                                | 5528.25 | 1420.42 | 3.89    | 5.00E-06 | 2.73E-04 |
| 11       | 1          | L1-3 vs. M1-3 | 252095_at                   | AT3G51000                           |                                                                                                                                                                                                                                                                                                                                                                                                                               | 138.94  | 36.90   | 3.76    | 6.42E-05 | 1.56E-03 |
| 12       | 1          | L1-3 vs. M1-3 | 256091_at                   | AT1G20693                           | Encodes a protein belonging to the subgroup of HMGB (high mobility group B) proteins that have a distinctive DNA-binding motif, the HMG-box domain. The motif confers non-sequence specific interaction with linear DNA and structure-specific binding to distorted DNA sites. The HMGB proteins are involved in the assembly of nucleoprotein complexes. Can be phosphorylated by CK2alpha. The mRNA is cell-to-cell mobile. | 93.85   | 29.07   | 3.23    | 1.10E-06 | 1.01E-04 |
| 13       | 1          | L1-3 vs. M1-3 | 246619_at                   | AT5G36290                           | Member of the UPF0016 family of membrane proteins, belongs to the conserved group of Mn/Ca transporters.                                                                                                                                                                                                                                                                                                                      | 107.14  | 33.47   | 3.20    | 4.80E-06 | 2.72E-04 |
| 14       | 1          | L1-3 vs. M1-3 | 252267_at                   | AT3G49640                           | Aldolase-type TIM barrel family protein;(source:Araport11)                                                                                                                                                                                                                                                                                                                                                                    | 66.74   | 21.41   | 3.12    | 9.00E-07 | 9.46E-05 |
| 15       | 1          | L1-3 vs. M1-3 | 257004_s_a                  | AT3G14130                           | Aldolase-type TIM barrel family protein;(source:Araport11)                                                                                                                                                                                                                                                                                                                                                                    | 72.75   | 23.64   | 3.08    | 2.70E-06 | 1.78E-04 |
| 16       | 1          | L1-3 vs. M1-3 | 264223_s_a                  | AT1G67520                           | lectin protein kinase family protein;(source:Araport11)                                                                                                                                                                                                                                                                                                                                                                       | 28.54   | 9.26    | 3.08    | 4.01E-04 | 5.44E-03 |
| 17       | 1          | L1-3 vs. M1-3 | 261819_at                   | AT1G11410                           | S-locus lectin protein kinase family protein;(source:Araport11)                                                                                                                                                                                                                                                                                                                                                               | 64.12   | 21.22   | 3.02    | 5.70E-06 | 2.89E-04 |
| 18       | 1          | L1-3 vs. M1-3 | 258054_at                   | AT3G16240                           | Delta tonoplast intrinsic protein, functions as a water channel and ammonium (NH3) transporter. Highly expressed in flower, shoot, and stem. Expression shows diurnal regulation and is induced by ammonium (NH3). Protein localized to vacuolar membrane. The mRNA is cell-to-cell mobile.                                                                                                                                   | 379.24  | 127.47  | 2.98    | 2.67E-05 | 7.98E-04 |
| 19       | 1          | L1-3 vs. M1-3 | 260201_at                   | AT1G67600                           | Acid phosphatase/vanadium-dependent haloperoxidase-related protein;(source:Araport11)                                                                                                                                                                                                                                                                                                                                         | 111.06  | 38.26   | 2.90    | 3.00E-07 | 4.26E-05 |
| 20       | 1          | L1-3 vs. M1-3 | 251304_at                   | AT3G61990                           | Encodes a protein methyltransferase. Involved in the methylation of plant transmembrane proteins.                                                                                                                                                                                                                                                                                                                             | 41.61   | 14.45   | 2.88    | 2.06E-04 | 3.40E-03 |
| 21       | 1          | L1-3 vs. M1-3 | 266352_at                   | AT2G01610                           | Plant invertase/pectin methyltransferase inhibitor superfamily protein;(source:Araport11)                                                                                                                                                                                                                                                                                                                                     | 65.54   | 23.65   | 2.77    | 4.05E-05 | 1.10E-03 |
| 22       | 1          | L1-3 vs. M1-3 | 244912_at                   | ATMG00830                           | cytochrome c biogenesis orf382                                                                                                                                                                                                                                                                                                                                                                                                | 360.31  | 132.68  | 2.72    | 5.28E-05 | 1.36E-03 |
| 23       | 1          | L1-3 vs. M1-3 | 253041_at                   | AT4G37870                           | Encodes a phosphoenolpyruvate carboxykinase that localizes to the cytosol.                                                                                                                                                                                                                                                                                                                                                    | 610.79  | 224.95  | 2.72    | 2.13E-04 | 3.43E-03 |
| 24       | 1          | L1-3 vs. M1-3 | 251265_at                   | AT3G62310                           | RNA helicase family protein;(source:Araport11)                                                                                                                                                                                                                                                                                                                                                                                | 114.48  | 42.38   | 2.70    | 6.98E-04 | 7.56E-03 |

|    |   |               |            |           |                                                                                                                                                                                                                                                                                                                                                                                                                                                                             |         |        |      |          |          |
|----|---|---------------|------------|-----------|-----------------------------------------------------------------------------------------------------------------------------------------------------------------------------------------------------------------------------------------------------------------------------------------------------------------------------------------------------------------------------------------------------------------------------------------------------------------------------|---------|--------|------|----------|----------|
| 25 | 1 | L1-3 vs. M1-3 | 252950_at  | AT4G38690 | PLC-like phosphodiesterases superfamily protein;(source:Araport11)                                                                                                                                                                                                                                                                                                                                                                                                          | 27.28   | 10.32  | 2.64 | 2.16E-04 | 3.46E-03 |
| 26 | 1 | L1-3 vs. M1-3 | 258846_at  | AT3G03070 | NADH-ubiquinone oxidoreductase-like protein;(source:Araport11)                                                                                                                                                                                                                                                                                                                                                                                                              | 22.34   | 8.49   | 2.63 | 2.50E-06 | 1.76E-04 |
| 27 | 1 | L1-3 vs. M1-3 | 245292_at  | AT4G15093 | catalytic LigB subunit of aromatic ring-opening dioxygenase family;(source:Araport11)                                                                                                                                                                                                                                                                                                                                                                                       | 106.67  | 40.57  | 2.63 | 5.30E-06 | 2.79E-04 |
| 28 | 1 | L1-3 vs. M1-3 | 253684_at  | AT4G29690 | Alkaline-phosphatase-like family protein;(source:Araport11)                                                                                                                                                                                                                                                                                                                                                                                                                 | 82.33   | 31.67  | 2.60 | 9.85E-05 | 2.09E-03 |
| 29 | 1 | L1-3 vs. M1-3 | 250736_s_a | AT1G01350 | Zinc finger (CCCH-type/C3HC4-type RING finger) family protein;(source:Araport11)                                                                                                                                                                                                                                                                                                                                                                                            | 424.15  | 164.69 | 2.58 | 1.28E-05 | 5.02E-04 |
| 30 | 1 | L1-3 vs. M1-3 | 262885_at  | AT1G64740 | alpha-tubulin expressed primarily in stamens and mature pollen                                                                                                                                                                                                                                                                                                                                                                                                              | 162.90  | 63.42  | 2.57 | 9.30E-06 | 4.00E-04 |
|    |   |               | 254824_s_a |           | Origin Recognition Complex subunit 1b. Involved in the initiation of DNA replication. Regulated transcriptionally during cell cycle, peaking at G1/S-phase. Target of E2F/DF family of transcription factors. Interacts with ORC2 and ORC5. Highly expressed in proliferating cells. Expression levels are independent of light regime.                                                                                                                                     |         |        |      |          |          |
| 31 | 1 | L1-3 vs. M1-3 | t          | AT4G12620 |                                                                                                                                                                                                                                                                                                                                                                                                                                                                             | 307.26  | 120.51 | 2.55 | 1.69E-05 | 5.78E-04 |
| 32 | 1 | L1-3 vs. M1-3 | 258401_at  | AT3G15430 | Regulator of chromosome condensation (RCC1) family protein;(source:Araport11)                                                                                                                                                                                                                                                                                                                                                                                               | 165.03  | 64.99  | 2.54 | 1.06E-05 | 4.24E-04 |
|    |   |               |            |           | A caffeic acid/5-hydroxyferulic acid O-methyltransferase. Interacts with 14-4-3 proteins in yeast 2 hybrid assay. AtOMT1 (At5g54160) encodes a flavonol 3?-O-methyltransferase that is highly active towards quercetin and myricetin. The substrate specificity identifies the enzyme as flavonol 3?-methyltransferase which replaces the former annotation of the gene to encode a caffeic acid/5-hydroxyferulic acid O-methyltransferase The mRNA is cell-to-cell mobile. |         |        |      |          |          |
| 33 | 1 | L1-3 vs. M1-3 | 248200_at  | AT5G54160 | Golgi SNARE 11 protein (GOS11)                                                                                                                                                                                                                                                                                                                                                                                                                                              | 542.75  | 215.97 | 2.51 | 1.00E-06 | 9.79E-05 |
| 34 | 1 | L1-3 vs. M1-3 | 259498_at  | AT1G15880 | influenza virus NS1A-binding protein;(source:Araport11)                                                                                                                                                                                                                                                                                                                                                                                                                     | 356.52  | 148.57 | 2.40 | 1.60E-04 | 2.96E-03 |
| 35 | 1 | L1-3 vs. M1-3 | 251099_at  | AT5G01660 | Member of the minichromosome maintenance complex, involved in DNA replication initiation. Abundant in proliferating and endocycling tissues. Localized in the nucleus during G1, S and G2 phases of the cell cycle, and are released into the cytoplasmic compartment during mitosis. Binds chromatin.                                                                                                                                                                      | 119.78  | 50.32  | 2.38 | 3.47E-05 | 9.65E-04 |
| 36 | 1 | L1-3 vs. M1-3 | 255513_at  | AT4G02060 | OSBP(oxysterol binding protein)-related protein 3B;(source:Araport11)                                                                                                                                                                                                                                                                                                                                                                                                       | 24.21   | 10.22  | 2.37 | 1.64E-04 | 3.00E-03 |
| 37 | 1 | L1-3 vs. M1-3 | 259029_at  | AT3G09300 | nudix hydrolase homolog 8;(source:Araport11)                                                                                                                                                                                                                                                                                                                                                                                                                                | 223.00  | 94.57  | 2.36 | 5.00E-07 | 5.91E-05 |
| 38 | 1 | L1-3 vs. M1-3 | 248793_at  | AT5G47240 |                                                                                                                                                                                                                                                                                                                                                                                                                                                                             | 62.64   | 26.50  | 2.36 | 4.77E-04 | 5.88E-03 |
| 39 | 1 | L1-3 vs. M1-3 | 254851_at  | AT4G12010 | Leucine-rich repeat domain (NLR) receptor. Dominant negative alleles suppress catma3 autoimmunity. Co-regulates with WRKY19 basal levels of immunity to root-knot nematodes.                                                                                                                                                                                                                                                                                                | 24.59   | 10.60  | 2.32 | 4.30E-06 | 2.60E-04 |
| 40 | 1 | L1-3 vs. M1-3 | 258448_at  | AT3G22290 | Endoplasmic reticulum vesicle transporter protein;(source:Araport11)                                                                                                                                                                                                                                                                                                                                                                                                        | 78.40   | 34.09  | 2.30 | 2.24E-05 | 6.84E-04 |
| 41 | 1 | L1-3 vs. M1-3 | 265387_at  | AT2G20670 | sugar phosphate exchanger, putative (DUF506);(source:Araport11)                                                                                                                                                                                                                                                                                                                                                                                                             | 61.49   | 26.71  | 2.30 | 1.68E-04 | 3.04E-03 |
| 42 | 1 | L1-3 vs. M1-3 | 248580_at  | AT5G49890 | member of Anion channel protein family                                                                                                                                                                                                                                                                                                                                                                                                                                      | 114.28  | 49.93  | 2.29 | 6.00E-05 | 1.51E-03 |
| 43 | 1 | L1-3 vs. M1-3 | 267492_at  | AT2G30620 | winged-helix DNA-binding transcription factor family protein;(source:Araport11)                                                                                                                                                                                                                                                                                                                                                                                             | 226.77  | 100.00 | 2.27 | 1.63E-05 | 5.71E-04 |
| 44 | 1 | L1-3 vs. M1-3 | 246508_at  | AT5G16150 | Encodes a putative plastidic glucose transporter.                                                                                                                                                                                                                                                                                                                                                                                                                           | 419.83  | 188.86 | 2.22 | 3.07E-04 | 4.40E-03 |
| 45 | 1 | L1-3 vs. M1-3 | 267082_at  | AT2G41140 | Encodes CDPK-related kinase 1 (CRK1).                                                                                                                                                                                                                                                                                                                                                                                                                                       | 116.47  | 52.97  | 2.20 | 1.00E-06 | 9.79E-05 |
| 46 | 1 | L1-3 vs. M1-3 | 247918_at  | AT5G57610 | kinase superfamily with octicosapeptide/Phox/Bem1p domain-containing protein;(source:Araport11)                                                                                                                                                                                                                                                                                                                                                                             | 104.25  | 48.19  | 2.16 | 3.17E-05 | 9.09E-04 |
| 47 | 1 | L1-3 vs. M1-3 | 265195_at  | AT2G36730 | Pentatricopeptide repeat (PPR) superfamily protein;(source:Araport11)                                                                                                                                                                                                                                                                                                                                                                                                       | 31.18   | 14.41  | 2.16 | 7.52E-04 | 8.11E-03 |
| 48 | 1 | L1-3 vs. M1-3 | 257892_at  | AT3G17020 | Adenine nucleotide alpha hydrolases-like superfamily protein;(source:Araport11)                                                                                                                                                                                                                                                                                                                                                                                             | 266.70  | 124.58 | 2.14 | 2.60E-06 | 1.76E-04 |
| 49 | 1 | L1-3 vs. M1-3 | 260042_at  | AT1G68820 | Putative C3HC4 zinc-finger ubiquitin E3 ligase, negative regulator in ABA and drought stress response.                                                                                                                                                                                                                                                                                                                                                                      | 42.86   | 20.27  | 2.11 | 3.28E-04 | 4.63E-03 |
|    |   |               | 255997_s_a |           | Subunit of light-harvesting complex II (LHCII),which absorbs light and transfers energy to the photosynthetic reaction center. The mRNA is cell-to-cell mobile.                                                                                                                                                                                                                                                                                                             |         |        |      |          |          |
| 50 | 1 | L1-3 vs. M1-3 | t          | AT1G29930 | Involved in light-dependent cold tolerance and encodes an enolase. Protein is tyrosine-phosphorylated and its phosphorylation state is modulated in response to ABA in Arabidopsis thaliana seeds.                                                                                                                                                                                                                                                                          | 1106.95 | 525.73 | 2.11 | 3.57E-04 | 4.94E-03 |
| 51 | 1 | L1-3 vs. M1-3 | 263924_at  | AT2G36530 | cinnamyl-alcohol dehydrogenase;(source:Araport11)                                                                                                                                                                                                                                                                                                                                                                                                                           | 439.72  | 209.39 | 2.10 | 4.05E-05 | 1.10E-03 |
| 52 | 1 | L1-3 vs. M1-3 | 259911_at  | AT1G72680 |                                                                                                                                                                                                                                                                                                                                                                                                                                                                             | 93.69   | 44.88  | 2.09 | 1.00E-04 | 2.11E-03 |
| 53 | 1 | L1-3 vs. M1-3 | 250062_at  | AT5G17760 | P-loop containing nucleoside triphosphate hydrolases superfamily protein;(source:Araport11) Encodes tubulin-folding cofactor D. Mutants arrest during embryogenesis with embryos that are small, mushroom-shaped (Primepilz Prime) and consist of only one or few large cells each containing one or more variably enlarged nuclei and often cell wall stubs. Gene product necessary for continuous microtubule organization.                                               | 34.17   | 16.32  | 2.09 | 8.13E-04 | 8.54E-03 |
| 54 | 1 | L1-3 vs. M1-3 | 251383_at  | AT3G60740 |                                                                                                                                                                                                                                                                                                                                                                                                                                                                             | 16.98   | 8.17   | 2.08 | 1.50E-06 | 1.22E-04 |
|    |   |               | 262537_s_a |           |                                                                                                                                                                                                                                                                                                                                                                                                                                                                             |         |        |      |          |          |
| 55 | 1 | L1-3 vs. M1-3 | t          | AT1G17280 | Group XIV ubiquitin-conjugating enzyme that functions negative regulation of drought stress.                                                                                                                                                                                                                                                                                                                                                                                | 241.70  | 116.15 | 2.08 | 4.34E-04 | 5.68E-03 |
| 56 | 1 | L1-3 vs. M1-3 | 258314_at  | AT3G16100 | RAB GTPase homolog G3C;(source:Araport11)                                                                                                                                                                                                                                                                                                                                                                                                                                   | 31.99   | 15.51  | 2.06 | 5.60E-06 | 2.89E-04 |
| 57 | 1 | L1-3 vs. M1-3 | 247650_at  | AT5G59960 | K-stimulated pyrophosphate-energized sodium pump protein;(source:Araport11)                                                                                                                                                                                                                                                                                                                                                                                                 | 68.44   | 33.26  | 2.06 | 6.08E-04 | 6.91E-03 |

|    |   |               |            |           |                                                                                                                                                                                                                                                                                                                                                                                                                                                                                                                                                                                           |        |        |      |          |          |
|----|---|---------------|------------|-----------|-------------------------------------------------------------------------------------------------------------------------------------------------------------------------------------------------------------------------------------------------------------------------------------------------------------------------------------------------------------------------------------------------------------------------------------------------------------------------------------------------------------------------------------------------------------------------------------------|--------|--------|------|----------|----------|
| 58 | 1 | L1-3 vs. M1-3 | 260579_at  | AT2G47380 | Cytochrome c oxidase subunit Vc family protein;(source:Araport11)                                                                                                                                                                                                                                                                                                                                                                                                                                                                                                                         | 218.43 | 106.57 | 2.05 | < 1e-07  | 2.58E-05 |
| 59 | 1 | L1-3 vs. M1-3 | 257784_at  | AT3G26980 | membrane-anchored ubiquitin-fold protein 4 precursor;(source:Araport11)<br>Encodes a member of a plant-specific gene family that is required for embryo provasculture development. The gene product regulates vascular network complexity and connectivity in cotyledons.                                                                                                                                                                                                                                                                                                                 | 60.20  | 29.53  | 2.04 | 2.80E-04 | 4.20E-03 |
| 60 | 1 | L1-3 vs. M1-3 | 266358_at  | AT2G32280 | nodulin MtN21-like transporter family protein                                                                                                                                                                                                                                                                                                                                                                                                                                                                                                                                             | 108.04 | 53.06  | 2.04 | 3.07E-04 | 4.40E-03 |
| 61 | 1 | L1-3 vs. M1-3 | 245436_at  | AT4G16620 | PPPDE putative thiol peptidase family protein;(source:Araport11)                                                                                                                                                                                                                                                                                                                                                                                                                                                                                                                          | 26.84  | 13.21  | 2.03 | 2.13E-04 | 3.43E-03 |
| 62 | 1 | L1-3 vs. M1-3 | 245308_at  | AT4G17486 | A member of ROP GTPase gene family; Encodes a Rho-like GTP binding protein.                                                                                                                                                                                                                                                                                                                                                                                                                                                                                                               | 218.18 | 107.79 | 2.02 | 1.82E-05 | 6.01E-04 |
| 63 | 1 | L1-3 vs. M1-3 | 253225_at  | AT4G35020 | 5-3 exonuclease family protein;(source:Araport11)                                                                                                                                                                                                                                                                                                                                                                                                                                                                                                                                         | 279.14 | 138.70 | 2.01 | 4.17E-04 | 5.56E-03 |
| 64 | 1 | L1-3 vs. M1-3 | 259928_at  | AT1G34380 |                                                                                                                                                                                                                                                                                                                                                                                                                                                                                                                                                                                           | 96.47  | 47.95  | 2.01 | 5.45E-04 | 6.36E-03 |
| 65 | 1 | L1-3 vs. M1-3 | 253203_at  | AT4G34710 | Encodes a arginine decarboxylase (ADC), a rate-limiting enzyme that catalyzes the first step of polyamine (PA) biosynthesis via ADC pathway in Arabidopsis thaliana. Arabidopsis genome has two ADC paralogs, ADC1 and ADC2. ADC2 is stress-inducible (osmotic stress). Double mutant analysis showed that ADC genes are essential for the production of PA, and are required for normal seed development. Overexpression causes phenotypes similar to GA-deficient plants and these plants show reduced levels of GA due to lower expression levels of AtGA20ox1, AtGA3ox3 and AtGA3ox1. | 231.72 | 116.53 | 1.99 | 6.34E-04 | 7.14E-03 |
| 66 | 1 | L1-3 vs. M1-3 | 265187_at  | AT1G23490 | Gene encoding ADP-ribosylation factor and similar to other ARFs and ARF-like proteins. A member of ARF GTPase family. Arabidopsis has 21 known members, known to be essential for vesicle coating and uncoating and functions in GTP-binding. The gene is shown to play a role in cell division, cell expansion and cellulose production using antisense construct.                                                                                                                                                                                                                       | 236.39 | 119.68 | 1.98 | 1.16E-04 | 2.35E-03 |
| 67 | 1 | L1-3 vs. M1-3 | 253477_at  | AT4G32320 | Encodes a cytosolic ascorbate peroxidase APX6. Ascorbate peroxidases are enzymes that scavenge hydrogen peroxide in plant cells. Eight types of APX have been described for Arabidopsis: three cytosolic (APX1, APX2, APX6), two chloroplastic types (stromal sAPX, thylakoid tAPX), and three microsomal (APX3, APX4, APX5) isoforms.                                                                                                                                                                                                                                                    | 84.33  | 42.85  | 1.97 | 4.10E-06 | 2.53E-04 |
| 68 | 1 | L1-3 vs. M1-3 | 248967_at  | AT5G45350 | proline-rich family protein;(source:Araport11)<br>member of the peroxin11 (PEX11) gene family, integral to peroxisome membrane, controls peroxisome proliferation. The mRNA is cell-to-cell mobile.                                                                                                                                                                                                                                                                                                                                                                                       | 213.37 | 109.75 | 1.94 | 1.30E-06 | 1.09E-04 |
| 69 | 1 | L1-3 vs. M1-3 | 266925_at  | AT2G45740 | Ribosomal L29 family protein;(source:Araport11)                                                                                                                                                                                                                                                                                                                                                                                                                                                                                                                                           | 502.15 | 259.01 | 1.94 | 1.00E-05 | 4.09E-04 |
| 70 | 1 | L1-3 vs. M1-3 | 251834_at  | AT3G55170 | hypothetical protein (DUF1677);(source:Araport11)                                                                                                                                                                                                                                                                                                                                                                                                                                                                                                                                         | 12.97  | 6.68   | 1.94 | 7.88E-04 | 8.34E-03 |
| 71 | 1 | L1-3 vs. M1-3 | 256926_at  | AT3G22540 | DNA-directed RNA polymerase subunit beta;(source:Araport11)                                                                                                                                                                                                                                                                                                                                                                                                                                                                                                                               | 81.75  | 42.27  | 1.93 | 4.97E-04 | 6.08E-03 |
| 72 | 1 | L1-3 vs. M1-3 | 267586_at  | AT2G41950 | Vacuolar import/degradation, Vid27-related protein;(source:Araport11)                                                                                                                                                                                                                                                                                                                                                                                                                                                                                                                     | 25.07  | 13.08  | 1.92 | 2.56E-04 | 3.94E-03 |
| 73 | 1 | L1-3 vs. M1-3 | 257029_at  | AT3G19240 | Encodes a serine/threonine protein kinase with similarities to CBL-interacting protein kinases, SNF1 and SOS2. The mRNA is cell-to-cell mobile.                                                                                                                                                                                                                                                                                                                                                                                                                                           | 144.29 | 75.51  | 1.91 | 2.00E-07 | 3.78E-05 |
| 74 | 1 | L1-3 vs. M1-3 | 257771_at  | AT3G23000 | Encodes a Pi starvation-responsive protein AtPS3. A member of the phosphate starvation-induced glycerol-3-phosphate permease gene family: AT3G47420(G3Pp1), AT4G25220(G3Pp2), AT1G30560(G3Pp3), AT4G17550(G3Pp4) and AT2G13100(G3Pp5). Its expression is responsive to phosphate (Pi) and not phosphite (Phi) in roots and shoots.                                                                                                                                                                                                                                                        | 28.41  | 14.85  | 1.91 | 1.40E-05 | 5.30E-04 |
| 75 | 1 | L1-3 vs. M1-3 | 252414_at  | AT3G47420 | Glutathione S-transferase family protein;(source:Araport11)                                                                                                                                                                                                                                                                                                                                                                                                                                                                                                                               | 23.61  | 12.39  | 1.91 | 4.18E-04 | 5.56E-03 |
| 76 | 1 | L1-3 vs. M1-3 | 261149_s_a | AT1G19550 | RING/FYVE/PHD zinc finger superfamily protein;(source:Araport11)                                                                                                                                                                                                                                                                                                                                                                                                                                                                                                                          | 443.19 | 232.71 | 1.90 | 9.29E-04 | 9.38E-03 |
| 77 | 1 | L1-3 vs. M1-3 | 261852_at  | AT1G50440 | ATP-dependent RNA helicase;(source:Araport11)                                                                                                                                                                                                                                                                                                                                                                                                                                                                                                                                             | 65.27  | 34.68  | 1.88 | 9.16E-05 | 1.98E-03 |
| 78 | 1 | L1-3 vs. M1-3 | 253670_at  | AT4G30010 | Major facilitator superfamily protein;(source:Araport11)                                                                                                                                                                                                                                                                                                                                                                                                                                                                                                                                  | 137.25 | 72.81  | 1.88 | 3.38E-04 | 4.73E-03 |
| 79 | 1 | L1-3 vs. M1-3 | 254577_at  | AT4G19450 | encodes a member of the ERF (ethylene response factor) subfamily B-5 of ERF/AP2 transcription factor family. The protein contains one AP2 domain. There are 7 members in this subfamily.                                                                                                                                                                                                                                                                                                                                                                                                  | 294.77 | 156.87 | 1.88 | 4.21E-04 | 5.58E-03 |
| 80 | 1 | L1-3 vs. M1-3 | 259750_at  | AT1G71130 | Enables plants to cope with moderate light stress and affects cadmium tolerance.                                                                                                                                                                                                                                                                                                                                                                                                                                                                                                          | 35.68  | 19.13  | 1.87 | 6.22E-05 | 1.53E-03 |
| 81 | 1 | L1-3 vs. M1-3 | 246154_at  | AT5G19940 | AtOXS2 specifically entered the nuclear under salt stress. Te specific nuclear localization of AtOXS2 could play a role in salt tolerance at the molecular level. Tese results implied that AtOXS2 might target some downstream cis-elements which are required for salt stress responses                                                                                                                                                                                                                                                                                                 | 70.68  | 37.78  | 1.87 | 2.45E-04 | 3.84E-03 |
| 82 | 1 | L1-3 vs. M1-3 | 267534_at  | AT2G41900 | costars family protein;(source:Araport11)                                                                                                                                                                                                                                                                                                                                                                                                                                                                                                                                                 | 62.27  | 33.90  | 1.84 | 8.00E-06 | 3.60E-04 |
| 83 | 1 | L1-3 vs. M1-3 | 253304_at  | AT4G33640 | molecular function has not been defined. Was shown involved in oxidative stress tolerance.                                                                                                                                                                                                                                                                                                                                                                                                                                                                                                | 95.26  | 52.13  | 1.83 | 6.80E-04 | 7.45E-03 |
| 84 | 1 | L1-3 vs. M1-3 | 261601_at  | AT1G49670 | Protein interacts with Agrobacterium proteins VirD2 and VirE2.                                                                                                                                                                                                                                                                                                                                                                                                                                                                                                                            | 50.41  | 27.71  | 1.82 | 3.00E-07 | 4.26E-05 |
| 85 | 1 | L1-3 vs. M1-3 | 264256_at  | AT1G09270 |                                                                                                                                                                                                                                                                                                                                                                                                                                                                                                                                                                                           | 213.76 | 117.30 | 1.82 | 8.35E-04 | 8.65E-03 |

|     |   |               |            |           |                                                                                                                                                                                                                                                                                                                                                                                                                                                                                                                                                                                                                                                                                          |         |         |      |          |          |
|-----|---|---------------|------------|-----------|------------------------------------------------------------------------------------------------------------------------------------------------------------------------------------------------------------------------------------------------------------------------------------------------------------------------------------------------------------------------------------------------------------------------------------------------------------------------------------------------------------------------------------------------------------------------------------------------------------------------------------------------------------------------------------------|---------|---------|------|----------|----------|
| 86  | 1 | L1-3 vs. M1-3 | 258507_at  | AT3G06500 | Encodes an alkaline/neutral invertase which localizes in mitochondria. It may be modulating hormone balance in relation to the radicle emergence. Mutants display severely reduced shoot growth and reduced oxygen consumption. Mutant root development is not affected as reported for A/N-Inva mutant (inva) plants. The mRNA is cell-to-cell mobile.<br>Encodes a protein that functions in microtubule assembly. PLP3a can bind to several different tubulin family members in Y2H assays. Plants with reduced levels of both PLP3a and PLP3b (At5g66410) show defects in cytokinesis, cortical microtubule array formation, oriented cell growth, and maintenance of proper ploidy. | 138.08  | 76.31   | 1.81 | 2.00E-07 | 3.78E-05 |
| 87  | 1 | L1-3 vs. M1-3 | 252127_at  | AT3G50960 | Encodes a chloroplast-localized protein that modulates cytoplasmic Ca <sup>2+</sup> concentration and is crucial for proper stomatal regulation in response to elevations of external Ca <sup>2+</sup> . Phosphorylation of this protein is dependent on calcium.<br>encodes a major leaf ferredoxin                                                                                                                                                                                                                                                                                                                                                                                     | 46.68   | 25.79   | 1.81 | 1.30E-06 | 1.09E-04 |
| 88  | 1 | L1-3 vs. M1-3 | 249876_at  | AT5G23060 | nuclear protein;(source:Araport11)                                                                                                                                                                                                                                                                                                                                                                                                                                                                                                                                                                                                                                                       | 35.19   | 19.49   | 1.81 | 1.02E-04 | 2.12E-03 |
| 89  | 1 | L1-3 vs. M1-3 | 259727_at  | AT1G60950 | transmembrane protein, putative (DUF247);(source:Araport11)                                                                                                                                                                                                                                                                                                                                                                                                                                                                                                                                                                                                                              | 2741.94 | 1515.30 | 1.81 | 1.49E-04 | 2.84E-03 |
| 90  | 1 | L1-3 vs. M1-3 | 261793_at  | AT1G16080 | transmembrane protein;(source:Araport11)                                                                                                                                                                                                                                                                                                                                                                                                                                                                                                                                                                                                                                                 | 107.63  | 60.08   | 1.79 | 1.52E-04 | 2.88E-03 |
| 91  | 1 | L1-3 vs. M1-3 | 252190_at  | AT3G50170 |                                                                                                                                                                                                                                                                                                                                                                                                                                                                                                                                                                                                                                                                                          | 14.30   | 8.01    | 1.78 | 7.54E-05 | 1.73E-03 |
| 92  | 1 | L1-3 vs. M1-3 | 266906_at  | AT2G34585 |                                                                                                                                                                                                                                                                                                                                                                                                                                                                                                                                                                                                                                                                                          | 81.59   | 45.71   | 1.78 | 4.76E-04 | 5.88E-03 |
| 93  | 1 | L1-3 vs. M1-3 | 265012_at  | AT1G24470 | Encodes one of the two Arabidopsis homologues to YBR159w encoding a <i>S. cerevisiae</i> beta-ketoacyl reductase (KCR), which catalyzes the first reduction during VLCFA (very long chain fatty acids, >18 carbon) elongation: KCR1 (At1g67730), KCR2 (At1g24470). Complementation of the yeast ybr159Delta mutant demonstrated that the two KCR proteins are divergent and that only AtKCR1 can restore heterologous elongase activity similar to the native yeast KCR gene.                                                                                                                                                                                                            | 30.06   | 16.92   | 1.78 | 5.23E-04 | 6.22E-03 |
| 94  | 1 | L1-3 vs. M1-3 | 263113_at  | AT1G03150 | Acyl-CoA N-acyltransferases (NAT) superfamily protein;(source:Araport11)                                                                                                                                                                                                                                                                                                                                                                                                                                                                                                                                                                                                                 | 96.60   | 54.72   | 1.77 | 8.38E-04 | 8.65E-03 |
| 95  | 1 | L1-3 vs. M1-3 | 266275_at  | AT2G29370 | NAD(P)-binding Rossmann-fold superfamily protein;(source:Araport11)                                                                                                                                                                                                                                                                                                                                                                                                                                                                                                                                                                                                                      | 30.27   | 17.22   | 1.76 | 6.72E-04 | 7.42E-03 |
| 96  | 1 | L1-3 vs. M1-3 | 267027_at  | AT2G38330 | MATE efflux family protein;(source:Araport11)<br>Mononuclear Fe(II)-containing member of the b-lactamase fold superfamily. ETHE1 is homodimeric in solution, exhibits low-level esterase activity, and specifically binds a single Fe(II) atom in the active site.                                                                                                                                                                                                                                                                                                                                                                                                                       | 35.63   | 20.31   | 1.75 | 2.50E-05 | 7.55E-04 |
| 97  | 1 | L1-3 vs. M1-3 | 260986_at  | AT1G53580 |                                                                                                                                                                                                                                                                                                                                                                                                                                                                                                                                                                                                                                                                                          | 76.79   | 43.94   | 1.75 | 2.91E-04 | 4.27E-03 |
| 98  | 1 | L1-3 vs. M1-3 | 245985_at  | AT5G13120 | Encodes a luminal cyclophilin with peptidyl-prolyl isomerase activity that is associated with the NAD(P)H dehydrogenase complex in stromal regions of the thylakoid membrane. It is likely to be important for the accumulation of the hydrophobic domain of the NAD(P)H dehydrogenase complex.                                                                                                                                                                                                                                                                                                                                                                                          | 625.06  | 359.13  | 1.74 | 3.12E-04 | 4.45E-03 |
| 99  | 1 | L1-3 vs. M1-3 | 251117_at  | AT3G63390 | This complex is associated with PSI and is responsible for the reduction of plastoquinone.                                                                                                                                                                                                                                                                                                                                                                                                                                                                                                                                                                                               | 121.71  | 70.15   | 1.73 | 1.73E-05 | 5.78E-04 |
| 100 | 1 | L1-3 vs. M1-3 | 265872_at  | AT2G01670 | hypothetical protein;(source:Araport11)                                                                                                                                                                                                                                                                                                                                                                                                                                                                                                                                                                                                                                                  | 104.76  | 60.64   | 1.73 | 3.36E-04 | 4.72E-03 |
| 101 | 1 | L1-3 vs. M1-3 | 260789_s_a | AT3G06690 | nudix hydrolase homolog 17;(source:Araport11)                                                                                                                                                                                                                                                                                                                                                                                                                                                                                                                                                                                                                                            | 22.88   | 13.21   | 1.73 | 5.24E-04 | 6.22E-03 |
| 102 | 1 | L1-3 vs. M1-3 | 255785_at  | AT1G19920 | putative acyl-coenzyme A oxidase;(source:Araport11)                                                                                                                                                                                                                                                                                                                                                                                                                                                                                                                                                                                                                                      | 67.41   | 39.19   | 1.72 | 6.90E-06 | 3.44E-04 |
| 103 | 1 | L1-3 vs. M1-3 | 253967_at  | AT4G26550 | encodes a chloroplast form of ATP sulfurylase.                                                                                                                                                                                                                                                                                                                                                                                                                                                                                                                                                                                                                                           | 99.06   | 57.53   | 1.72 | 7.57E-04 | 8.12E-03 |
| 104 | 1 | L1-3 vs. M1-3 | 247192_at  | AT5G65360 | Got1/Stt2-like vesicle transport protein family;(source:Araport11)                                                                                                                                                                                                                                                                                                                                                                                                                                                                                                                                                                                                                       | 27.06   | 15.74   | 1.72 | 7.84E-04 | 8.34E-03 |
| 105 | 1 | L1-3 vs. M1-3 | 265479_at  | AT2G15760 | Histone superfamily protein;(source:Araport11)                                                                                                                                                                                                                                                                                                                                                                                                                                                                                                                                                                                                                                           | 33.90   | 19.79   | 1.71 | 4.07E-05 | 1.10E-03 |
| 106 | 1 | L1-3 vs. M1-3 | 245809_at  | AT1G58440 | calmodulin-binding protein (DUF1645);(source:Araport11)<br>Encodes a putative protein that has been speculated, based on sequence similarities, to have squalene monooxygenase activity.                                                                                                                                                                                                                                                                                                                                                                                                                                                                                                 | 73.81   | 43.12   | 1.71 | 9.57E-05 | 2.06E-03 |
| 107 | 1 | L1-3 vs. M1-3 | 254658_at  | AT4G18230 | UDP-N-acetylglucosamine transferase subunit ALG14-like protein;(source:Araport11)                                                                                                                                                                                                                                                                                                                                                                                                                                                                                                                                                                                                        | 51.15   | 29.86   | 1.71 | 4.43E-04 | 5.72E-03 |
| 108 | 1 | L1-3 vs. M1-3 | 245442_at  | AT4G16710 | glycosyltransferase family protein 28;(source:Araport11)                                                                                                                                                                                                                                                                                                                                                                                                                                                                                                                                                                                                                                 | 197.32  | 116.28  | 1.70 | 1.75E-04 | 3.10E-03 |
| 109 | 1 | L1-3 vs. M1-3 | 248655_at  | AT5G48760 | Ribosomal protein L13 family protein;(source:Araport11)                                                                                                                                                                                                                                                                                                                                                                                                                                                                                                                                                                                                                                  | 346.40  | 203.91  | 1.70 | 2.31E-04 | 3.69E-03 |
| 110 | 1 | L1-3 vs. M1-3 | 247609_at  | AT5G60940 | Member of CstF complex.                                                                                                                                                                                                                                                                                                                                                                                                                                                                                                                                                                                                                                                                  | 37.87   | 22.41   | 1.69 | 1.93E-04 | 3.29E-03 |
| 111 | 1 | L1-3 vs. M1-3 | 248462_at  | AT5G50960 | Highly similar to <i>Saccharomyces cerevisiae</i> NBP35, locus YGL091C. Cytosolic protein that homodimerizes and can assemble both 4Fe-4S - type and 2Fe-2S - type clusters on its amino terminal and carboxy terminal respectively. Null mutants are embryo lethal.                                                                                                                                                                                                                                                                                                                                                                                                                     | 158.70  | 93.71   | 1.69 | 3.43E-04 | 4.77E-03 |
| 112 | 1 | L1-3 vs. M1-3 | 264526_at  | AT1G10130 | Encodes a golgi localized P2A-type Ca <sup>2+</sup> ATPase involved in Mn nutrition and homeostasis.                                                                                                                                                                                                                                                                                                                                                                                                                                                                                                                                                                                     | 138.00  | 81.59   | 1.69 | 5.33E-04 | 6.28E-03 |
| 113 | 1 | L1-3 vs. M1-3 | 245885_at  | AT5G09440 | EXORDIUM like 4;(source:Araport11)                                                                                                                                                                                                                                                                                                                                                                                                                                                                                                                                                                                                                                                       | 714.96  | 423.78  | 1.69 | 9.10E-04 | 9.26E-03 |
| 114 | 1 | L1-3 vs. M1-3 | 261239_at  | AT1G32930 | Galactosyltransferase family protein;(source:Araport11)                                                                                                                                                                                                                                                                                                                                                                                                                                                                                                                                                                                                                                  | 264.56  | 157.05  | 1.68 | 8.33E-05 | 1.85E-03 |

|     |   |               |           |           |                                                                                                                                                                                                                                                                                                                                                                                                                                                                                                                    |        |        |      |          |          |
|-----|---|---------------|-----------|-----------|--------------------------------------------------------------------------------------------------------------------------------------------------------------------------------------------------------------------------------------------------------------------------------------------------------------------------------------------------------------------------------------------------------------------------------------------------------------------------------------------------------------------|--------|--------|------|----------|----------|
| 115 | 1 | L1-3 vs. M1-3 | 262844_at | AT1G14890 | Plant invertase/pectin methylesterase inhibitor superfamily protein;(source:Araport11)                                                                                                                                                                                                                                                                                                                                                                                                                             | 25.99  | 15.56  | 1.67 | 5.81E-05 | 1.47E-03 |
| 116 | 1 | L1-3 vs. M1-3 | 265244_at | AT2G43020 | Encodes a polyamine oxidase.                                                                                                                                                                                                                                                                                                                                                                                                                                                                                       | 98.00  | 58.52  | 1.67 | 2.39E-04 | 3.77E-03 |
| 117 | 1 | L1-3 vs. M1-3 | 248820_at | AT5G47060 | hypothetical protein (DUF581);(source:Araport11)                                                                                                                                                                                                                                                                                                                                                                                                                                                                   | 84.59  | 50.79  | 1.67 | 4.56E-04 | 5.81E-03 |
| 118 | 1 | L1-3 vs. M1-3 | 247986_at | AT5G56880 | hypothetical protein;(source:Araport11)                                                                                                                                                                                                                                                                                                                                                                                                                                                                            | 148.75 | 90.95  | 1.64 | 2.13E-04 | 3.43E-03 |
| 119 | 1 | L1-3 vs. M1-3 | 250465_at | AT5G10070 | RNase L inhibitor protein-like protein;(source:Araport11)                                                                                                                                                                                                                                                                                                                                                                                                                                                          | 70.60  | 43.18  | 1.64 | 6.70E-04 | 7.42E-03 |
| 120 | 1 | L1-3 vs. M1-3 | 256112_at | AT1G16920 | small GTP-binding protein (Rab11)similar to YPT3/RAB11 proteins in yeast and mammals, respectively. YPT3/RAB11 is involved in intracellular protein trafficking.                                                                                                                                                                                                                                                                                                                                                   | 809.12 | 491.98 | 1.64 | 1.00E-03 | 9.91E-03 |
| 121 | 1 | L1-3 vs. M1-3 | 253776_at | AT4G28390 | Encodes a mitochondrial ADP/ATP carrier protein. Shown in heterologous systems to be located in the plasma membrane. Has comparable affinity for ADP and ATP (in E.coli).                                                                                                                                                                                                                                                                                                                                          | 423.21 | 259.43 | 1.63 | 2.64E-04 | 4.03E-03 |
| 122 | 1 | L1-3 vs. M1-3 | 250033_at | AT5G18110 | Putative cap-binding protein;(source:Araport11)                                                                                                                                                                                                                                                                                                                                                                                                                                                                    | 110.21 | 67.96  | 1.62 | 5.30E-04 | 6.27E-03 |
| 123 | 1 | L1-3 vs. M1-3 | 265738_at | AT2G01350 | At2g01350 encodes quinolinate phosphoribosyl transferase involved in NAD biosynthesis as shown by heterologous expression in E. coli.                                                                                                                                                                                                                                                                                                                                                                              | 21.62  | 13.43  | 1.61 | 5.22E-04 | 6.22E-03 |
| 124 | 1 | L1-3 vs. M1-3 | 253272_at | AT4G34190 | Encodes a stress enhanced protein that localizes to the thylakoid membrane and whose mRNA is upregulated in response to high light intensity. It may be involved in chlorophyll binding.                                                                                                                                                                                                                                                                                                                           | 48.02  | 30.00  | 1.60 | 1.03E-04 | 2.13E-03 |
| 125 | 1 | L1-3 vs. M1-3 | 262716_at | AT1G16470 | Encodes 20S proteasome subunit PAB1 (PAB1).                                                                                                                                                                                                                                                                                                                                                                                                                                                                        | 394.45 | 245.81 | 1.60 | 1.35E-04 | 2.62E-03 |
| 126 | 1 | L1-3 vs. M1-3 | 248693_at | AT5G48330 | Regulator of chromosome condensation (RCC1) family protein;(source:Araport11)                                                                                                                                                                                                                                                                                                                                                                                                                                      | 30.51  | 19.07  | 1.60 | 2.02E-04 | 3.39E-03 |
| 127 | 1 | L1-3 vs. M1-3 | 249792_at | AT5G23720 | Encodes a protein tyrosine phosphatase Propyzamide-Hypersensitive 1 (PHS1). One of the mutant alleles, phs1-1, is hypersensitive to the microtubule-destabilizing drug propyzamide, suggesting that PHS1 may be involved in phosphorylation cascades that control the dynamics of cortical microtubules in plant cells. A second allele, phs1-3, is hypersensitive to abscisic acid, indicating a possible involvement of PHS1 in ABA signalling.                                                                  | 14.44  | 9.01   | 1.60 | 4.45E-04 | 5.72E-03 |
| 128 | 1 | L1-3 vs. M1-3 | 264970_at | AT1G67280 | Encodes a Ni+ dependent glyoxylase.                                                                                                                                                                                                                                                                                                                                                                                                                                                                                | 271.38 | 170.34 | 1.59 | 8.22E-04 | 8.55E-03 |
| 129 | 1 | L1-3 vs. M1-3 | 261483_at | AT1G14270 | CAAX amino terminal protease family protein;(source:Araport11)                                                                                                                                                                                                                                                                                                                                                                                                                                                     | 35.36  | 22.54  | 1.57 | 1.29E-04 | 2.52E-03 |
| 130 | 1 | L1-3 vs. M1-3 | 252941_at | AT4G39280 | phenylalanyl-tRNA synthetase, putative / phenylalanine-tRNA ligase;(source:Araport11)                                                                                                                                                                                                                                                                                                                                                                                                                              | 476.51 | 303.98 | 1.57 | 2.76E-04 | 4.16E-03 |
| 131 | 1 | L1-3 vs. M1-3 | 263987_at | AT2G42690 | alpha/beta-Hydrolases superfamily protein;(source:Araport11)                                                                                                                                                                                                                                                                                                                                                                                                                                                       | 49.36  | 31.44  | 1.57 | 5.11E-04 | 6.18E-03 |
| 132 | 1 | L1-3 vs. M1-3 | 266459_at | AT2G47970 | Nuclear pore localization protein NPL4;(source:Araport11)                                                                                                                                                                                                                                                                                                                                                                                                                                                          | 45.55  | 28.97  | 1.57 | 7.58E-04 | 8.12E-03 |
| 133 | 1 | L1-3 vs. M1-3 | 262823_at | AT1G11750 | One of several nuclear-encoded ClpPs (caseinolytic protease). Contains a highly conserved catalytic triad of Ser-type proteases (Ser-His-Asp). The name reflects nomenclature described in Adam et. al (2001).                                                                                                                                                                                                                                                                                                     | 172.11 | 110.20 | 1.56 | 4.32E-04 | 5.68E-03 |
| 134 | 1 | L1-3 vs. M1-3 | 254596_at | AT4G18975 | Pentatricopeptide repeat (PPR) superfamily protein;(source:Araport11)                                                                                                                                                                                                                                                                                                                                                                                                                                              | 29.88  | 19.33  | 1.55 | 5.77E-04 | 6.60E-03 |
| 135 | 1 | L1-3 vs. M1-3 | 264120_at | AT1G79340 | Encodes MCP2d, the predominant and constitutively expressed member of type II metacaspases (MCPs). MCP2d plays a positive regulatory role in biotic and abiotic stress-induced programmed cell death (PCD). Arabidopsis contains three type I MCP genes (MCP1a-c) and six type II MCP genes (MCP2a-f): AtMCP1a/At5g64240, AtMCP1b/At1g02170, AtMCP1c/At4g25110, AtMCP2a/At1g79310, AtMCP2b/At1g79330, AtMCP2c/At1g79320, AtMCP2d/At1g79340, AtMCP2e/At1g16420, AtMCP2f/At5g04200. The mRNA is cell-to-cell mobile. | 40.04  | 26.06  | 1.54 | 1.90E-04 | 3.28E-03 |
| 136 | 1 | L1-3 vs. M1-3 | 260496_at | AT2G41700 | ATP-binding cassette A1;(source:Araport11)                                                                                                                                                                                                                                                                                                                                                                                                                                                                         | 107.18 | 69.45  | 1.54 | 4.74E-04 | 5.88E-03 |
| 137 | 1 | L1-3 vs. M1-3 | 251961_at | AT3G53620 | Encodes a soluble protein with inorganic pyrophosphatase activity that is highly specific for Mg-inorganic pyrophosphate. The mRNA is cell-to-cell mobile.                                                                                                                                                                                                                                                                                                                                                         | 127.28 | 82.61  | 1.54 | 8.85E-04 | 9.07E-03 |
| 138 | 1 | L1-3 vs. M1-3 | 263705_at | AT1G31190 | Encodes a myo-inositol monophosphatase IMPL1 (myo-Inositol monophosphatase like 1).                                                                                                                                                                                                                                                                                                                                                                                                                                | 164.28 | 107.24 | 1.53 | 1.25E-04 | 2.47E-03 |
| 139 | 1 | L1-3 vs. M1-3 | 246027_at | AT5G21060 | Glyceraldehyde-3-phosphate dehydrogenase-like family protein;(source:Araport11)                                                                                                                                                                                                                                                                                                                                                                                                                                    | 184.44 | 121.53 | 1.52 | 4.85E-04 | 5.95E-03 |
| 140 | 1 | L1-3 vs. M1-3 | 259801_at | AT1G72230 | Cupredoxin superfamily protein;(source:Araport11)                                                                                                                                                                                                                                                                                                                                                                                                                                                                  | 29.73  | 19.73  | 1.51 | 1.69E-04 | 3.04E-03 |
| 141 | 1 | L1-3 vs. M1-3 | 257587_at | AT1G56310 | DEDDy-type 3&#8242; -> 5&#8242; exoribonuclease involved in miRNA degradation.                                                                                                                                                                                                                                                                                                                                                                                                                                     | 260.47 | 172.21 | 1.51 | 6.63E-04 | 7.41E-03 |

|     |   |               |            |           |                                                                                                                                                                                                                                                                                                                                                                                                                                                                                                                                                                                                                                                                                                 |        |        |      |          |          |
|-----|---|---------------|------------|-----------|-------------------------------------------------------------------------------------------------------------------------------------------------------------------------------------------------------------------------------------------------------------------------------------------------------------------------------------------------------------------------------------------------------------------------------------------------------------------------------------------------------------------------------------------------------------------------------------------------------------------------------------------------------------------------------------------------|--------|--------|------|----------|----------|
| 142 | 1 | L1-3 vs. M1-3 | 258675_at  | AT3G08770 | Predicted to encode a PR (pathogenesis-related) protein. Belongs to the lipid transfer protein (PR-14) family with the following members: At2g38540/LTP1, At2g38530/LTP2, At5g59320/LTP3, At5g59310/LTP4, At3g51600/LTP5, At3g08770/LTP6, At2g15050/LTP7, At2g18370/LTP8, At2g15325/LTP9, At5g01870/LTP10, At4g33355/LTP11, At3g51590/LTP12, At5g44265/LTP13, At5g62065/LTP14, At4g08530/LTP15.                                                                                                                                                                                                                                                                                                 | 44.97  | 29.90  | 1.50 | 9.72E-04 | 9.75E-03 |
| 143 | 1 | L1-3 vs. M1-3 | 255443_at  | AT4G02700 | sulfate transporter 3;(source:Araport11)                                                                                                                                                                                                                                                                                                                                                                                                                                                                                                                                                                                                                                                        | 17.73  | 11.89  | 1.49 | 2.03E-04 | 3.39E-03 |
| 144 | 1 | L1-3 vs. M1-3 | 245352_at  | AT4G15490 | Encodes a protein that might have sinapic acid:UDP-glucose glucosyltransferase activity.                                                                                                                                                                                                                                                                                                                                                                                                                                                                                                                                                                                                        | 26.06  | 17.66  | 1.48 | 8.19E-04 | 8.55E-03 |
| 145 | 1 | L1-3 vs. M1-3 | 248575_at  | AT5G49840 | ATP-dependent Clp protease;(source:Araport11)                                                                                                                                                                                                                                                                                                                                                                                                                                                                                                                                                                                                                                                   | 119.71 | 81.20  | 1.47 | 5.16E-04 | 6.21E-03 |
| 146 | 1 | L1-3 vs. M1-3 | 263930_at  | AT2G36300 | Integral membrane Yip1 family protein;(source:Araport11)                                                                                                                                                                                                                                                                                                                                                                                                                                                                                                                                                                                                                                        | 81.98  | 124.35 | 0.66 | 6.98E-04 | 7.56E-03 |
| 147 | 1 | L1-3 vs. M1-3 | 260822_at  | AT1G06790 | Encodes a subunit of RNA polymerase III involved in maintaining global RNA homeostasis, not just that of genes transcribed by RNA pol III. Annexins are calcium binding proteins that are localized in the cytoplasm. When cytosolic Ca <sup>2+</sup> increases, they relocate to the plasma membrane. They may be involved in the Golgi-mediated secretion of polysaccharides.                                                                                                                                                                                                                                                                                                                 | 130.88 | 199.83 | 0.65 | 7.30E-06 | 3.51E-04 |
| 148 | 1 | L1-3 vs. M1-3 | 247210_at  | AT5G65020 | Encodes AtSPO11-1, one of the three Arabidopsis homologues of the archaeal DNA topoisomerase VIA subunit (topo VIA). Required for meiotic recombination. AtSPO11-1 and AtSPO11-2 have overlapping functions (i.e. both required for meiotic recombination) whereas AtSPO11-3 functions in DNA replication. AtSPO11-1 accumulates in foci in early G2. At 1 h post-S phase, no foci are observed, but by 3 h a majority (80%) of meiocytes at this time point contain >50 foci. However, by 5 h, AtSPO11-1 foci are no longer detectable. This suggests that the protein undergoes a rapid cycle of accumulation and disappearance in meiocytes over a period of between 1 and 5 h post-S phase. | 600.28 | 928.32 | 0.65 | 3.28E-05 | 9.22E-04 |
| 149 | 1 | L1-3 vs. M1-3 | 257179_at  | AT3G13170 | Fatty acid/sphingolipid desaturase;(source:Araport11)                                                                                                                                                                                                                                                                                                                                                                                                                                                                                                                                                                                                                                           | 10.67  | 16.29  | 0.65 | 1.94E-04 | 3.29E-03 |
| 150 | 1 | L1-3 vs. M1-3 | 251323_at  | AT3G61580 | DNAJ heat shock N-terminal domain-containing protein;(source:Araport11)                                                                                                                                                                                                                                                                                                                                                                                                                                                                                                                                                                                                                         | 64.87  | 100.43 | 0.65 | 4.74E-04 | 5.88E-03 |
| 151 | 1 | L1-3 vs. M1-3 | 263101_s_a | AT2G05250 | early nodulin-like protein 19;(source:Araport11)                                                                                                                                                                                                                                                                                                                                                                                                                                                                                                                                                                                                                                                | 58.83  | 90.28  | 0.65 | 5.96E-04 | 6.79E-03 |
| 152 | 1 | L1-3 vs. M1-3 | 254789_at  | AT4G12880 | member of Glycoside Hydrolase Family 16                                                                                                                                                                                                                                                                                                                                                                                                                                                                                                                                                                                                                                                         | 82.39  | 128.57 | 0.64 | 1.88E-04 | 3.26E-03 |
| 153 | 1 | L1-3 vs. M1-3 | 262842_at  | AT1G14720 | Galactose oxidase/kelch repeat superfamily protein;(source:Araport11)                                                                                                                                                                                                                                                                                                                                                                                                                                                                                                                                                                                                                           | 12.78  | 19.85  | 0.64 | 5.00E-04 | 6.09E-03 |
| 154 | 1 | L1-3 vs. M1-3 | 247636_at  | AT5G60570 | purple acid phosphatase 24;(source:Araport11)                                                                                                                                                                                                                                                                                                                                                                                                                                                                                                                                                                                                                                                   | 23.24  | 36.47  | 0.64 | 5.67E-04 | 6.54E-03 |
| 155 | 1 | L1-3 vs. M1-3 | 254111_at  | AT4G24890 | Acyl-CoA N-acyltransferase with RING/FYVE/PHD-type zinc finger domain-containing protein;(source:Araport11)                                                                                                                                                                                                                                                                                                                                                                                                                                                                                                                                                                                     | 11.27  | 17.98  | 0.63 | 7.90E-06 | 3.60E-04 |
| 156 | 1 | L1-3 vs. M1-3 | 264060_at  | AT2G27980 | Encodes a serine/threonine protein kinase.                                                                                                                                                                                                                                                                                                                                                                                                                                                                                                                                                                                                                                                      | 27.37  | 43.77  | 0.63 | 7.98E-04 | 8.42E-03 |
| 157 | 1 | L1-3 vs. M1-3 | 250545_at  | AT5G08160 | nucleolin;(source:Araport11)                                                                                                                                                                                                                                                                                                                                                                                                                                                                                                                                                                                                                                                                    | 119.61 | 194.81 | 0.61 | 5.00E-07 | 5.91E-05 |
| 158 | 1 | L1-3 vs. M1-3 | 259617_at  | AT1G47970 | CAP-3D is a subunit of condensin. It a target of MMD1 regulation and also involved in meiotic chromosome condensation. Mutants have reduced fertility. Required for the correct spatial relationship between centromeres and rDNA arrays.                                                                                                                                                                                                                                                                                                                                                                                                                                                       | 42.75  | 70.46  | 0.61 | 4.40E-06 | 2.60E-04 |
| 159 | 1 | L1-3 vs. M1-3 | 245522_at  | AT4G15890 | Nucleotide-sugar transporter family protein;(source:Araport11)                                                                                                                                                                                                                                                                                                                                                                                                                                                                                                                                                                                                                                  | 21.36  | 34.93  | 0.61 | 3.00E-05 | 8.69E-04 |
| 160 | 1 | L1-3 vs. M1-3 | 259523_at  | AT1G12500 | Associated with a QTL for quantitative disease resistance.                                                                                                                                                                                                                                                                                                                                                                                                                                                                                                                                                                                                                                      | 22.32  | 36.55  | 0.61 | 4.75E-04 | 5.88E-03 |
| 161 | 1 | L1-3 vs. M1-3 | 249889_at  | AT5G22540 | Encodes an acyl-acyl carrier protein thioesterase. Hydrolyzes primarily saturated acyl-ACPs with chain lengths that vary between 8 and 18 carbons. Involved in saturated fatty acid synthesis.                                                                                                                                                                                                                                                                                                                                                                                                                                                                                                  | 24.43  | 40.08  | 0.61 | 5.72E-04 | 6.57E-03 |
| 162 | 1 | L1-3 vs. M1-3 | 261722_at  | AT1G08510 | Nuclear-encoded, plastid-targeted globular protein that is functional as dimer.                                                                                                                                                                                                                                                                                                                                                                                                                                                                                                                                                                                                                 | 52.41  | 85.71  | 0.61 | 6.66E-04 | 7.41E-03 |
| 163 | 1 | L1-3 vs. M1-3 | 254810_at  | AT4G12390 | pectin methyltransferase inhibitor 1;(source:Araport11)                                                                                                                                                                                                                                                                                                                                                                                                                                                                                                                                                                                                                                         | 17.56  | 28.61  | 0.61 | 6.77E-04 | 7.44E-03 |
| 164 | 1 | L1-3 vs. M1-3 | 264996_at  | AT1G67230 | Encodes a nuclear coiled-coil protein related to the carrot peripheral nuclear protein NMCP1 that is involved in the determination of plant nuclear structure. Member of a small gene family in Arabidopsis containing 4 proteins (LNC1-4 or CRWN 1-4) with redundant functions in protection from oxidative damage, control of nuclear morphology and degradation of ABI5.                                                                                                                                                                                                                                                                                                                     | 44.78  | 74.58  | 0.60 | 4.46E-04 | 5.72E-03 |
| 165 | 1 | L1-3 vs. M1-3 | 249334_at  | AT5G41000 | Arabidopsis thaliana metal-nicotianamine transporter YSL4                                                                                                                                                                                                                                                                                                                                                                                                                                                                                                                                                                                                                                       | 16.13  | 27.36  | 0.59 | 4.76E-05 | 1.25E-03 |
| 166 | 1 | L1-3 vs. M1-3 | 252524_at  | AT3G46430 | Mitochondrial F1F0-ATP synthase.                                                                                                                                                                                                                                                                                                                                                                                                                                                                                                                                                                                                                                                                | 166.72 | 284.43 | 0.59 | 6.86E-05 | 1.60E-03 |
| 167 | 1 | L1-3 vs. M1-3 | 249284_at  | AT5G41810 | Avr9/Cf-9 rapidly elicited protein;(source:Araport11)                                                                                                                                                                                                                                                                                                                                                                                                                                                                                                                                                                                                                                           | 18.27  | 30.96  | 0.59 | 1.77E-04 | 3.12E-03 |
| 168 | 1 | L1-3 vs. M1-3 | 248962_at  | AT5G45680 | Peptidyl-Prolyl Isomerase located in chloroplast thylakoid lumen The mRNA is cell-to-cell mobile.                                                                                                                                                                                                                                                                                                                                                                                                                                                                                                                                                                                               | 68.88  | 117.19 | 0.59 | 2.90E-04 | 4.27E-03 |

|     |   |               |            |           |                                                                                                                                                                                                                                                                                                                                                                                                                                                                                                                         |        |         |      |          |          |
|-----|---|---------------|------------|-----------|-------------------------------------------------------------------------------------------------------------------------------------------------------------------------------------------------------------------------------------------------------------------------------------------------------------------------------------------------------------------------------------------------------------------------------------------------------------------------------------------------------------------------|--------|---------|------|----------|----------|
| 169 | 1 | L1-3 vs. M1-3 | 247281_at  | AT5G64350 | Encodes FK506-binding protein 12 (FKBP12 or FKP12). FKP12 overexpression dramatically enhances rapamycin sensitivity, whereas rapamycin inhibition is relieved in transgenic plants deficient in FKP12.                                                                                                                                                                                                                                                                                                                 | 343.56 | 578.74  | 0.59 | 3.27E-04 | 4.63E-03 |
| 170 | 1 | L1-3 vs. M1-3 | 255704_at  | AT4G00170 | Plant VAMP (vesicle-associated membrane protein) family protein;(source:Araport11)                                                                                                                                                                                                                                                                                                                                                                                                                                      | 32.32  | 55.16   | 0.59 | 4.23E-04 | 5.58E-03 |
| 171 | 1 | L1-3 vs. M1-3 | 264243_at  | AT1G54650 | Methyltransferase family protein;(source:Araport11)                                                                                                                                                                                                                                                                                                                                                                                                                                                                     | 57.82  | 100.27  | 0.58 | 6.00E-07 | 6.81E-05 |
| 172 | 1 | L1-3 vs. M1-3 | 263728_at  | AT1G60070 | Adaptor protein complex AP-1, gamma subunit;(source:Araport11)                                                                                                                                                                                                                                                                                                                                                                                                                                                          | 60.93  | 104.93  | 0.58 | 2.87E-05 | 8.40E-04 |
| 173 | 1 | L1-3 vs. M1-3 | 256677_at  | AT3G52190 | Encodes a plant specific protein structurally related to the SEC12 proteins of the early secretory pathway. Mutation of PHF1 impairs Pi transport. Expression was detected in all tissues, and was induced by Pi starvation. Localized in endoplasmic reticulum (ER), and mutation of PHF1 resulted in ER retention and reduced accumulation of the plasma membrane PHT1;1 transporter. Its expression is responsive to both phosphate (Pi) and phosphite (Phi) in shoots.                                              | 65.88  | 113.94  | 0.58 | 8.15E-05 | 1.82E-03 |
| 174 | 1 | L1-3 vs. M1-3 | 261354_at  | AT1G79690 | nudix hydrolase homolog 3;(source:Araport11)                                                                                                                                                                                                                                                                                                                                                                                                                                                                            | 34.60  | 59.38   | 0.58 | 4.04E-04 | 5.45E-03 |
| 175 | 1 | L1-3 vs. M1-3 | 256725_at  | AT2G34070 | Encodes a member of the TBL (TRICHOME BIREFRINGENCE-LIKE) gene family containing a plant-specific DUF231 (domain of unknown function) domain. TBL gene family has 46 members, two of which (TBR/AT5G06700 and TBL3/AT5G01360) have been shown to be involved in the synthesis and deposition of secondary wall cellulose, presumably by influencing the esterification state of pectic polymers. A nomenclature for this gene family has been proposed (Volker Bischoff & Wolf Scheible, 2010, personal communication). | 26.57  | 45.80   | 0.58 | 4.49E-04 | 5.74E-03 |
| 176 | 1 | L1-3 vs. M1-3 | 252870_at  | AT4G39940 | adenosine-5'-phosphosulfate-kinase (akn2) mRNA, complete The mRNA is cell-to-cell mobile.                                                                                                                                                                                                                                                                                                                                                                                                                               | 12.10  | 20.89   | 0.58 | 8.21E-04 | 8.55E-03 |
| 177 | 1 | L1-3 vs. M1-3 | 255430_at  | AT4G03320 | Encodes a component of the TIC (translocon at the inner envelope membrane of chloroplasts) protein translocation machinery mediating the protein translocation across the inner envelope of plastids. The Arabidopsis genome encodes four Tic20 homologous proteins, AT1G04940(Tic20-I), AT2G47840(Tic20-II), AT4G03320(Tic20-IV) and AT5G55710(Tic20-V).                                                                                                                                                               | 70.45  | 122.12  | 0.58 | 9.07E-04 | 9.26E-03 |
| 178 | 1 | L1-3 vs. M1-3 | 245351_at  | AT4G17640 | Encodes casein kinase II beta (regulatory) subunit.                                                                                                                                                                                                                                                                                                                                                                                                                                                                     | 143.87 | 247.51  | 0.58 | 9.15E-04 | 9.27E-03 |
| 179 | 1 | L1-3 vs. M1-3 | 266075_s_a | AT2G40710 | hemolysin-III related integral membrane protein;(source:Araport11)                                                                                                                                                                                                                                                                                                                                                                                                                                                      | 75.88  | 132.09  | 0.57 | 8.40E-06 | 3.72E-04 |
| 180 | 1 | L1-3 vs. M1-3 | 261537_at  | AT1G01800 | NAD(P)-binding Rossmann-fold superfamily protein;(source:Araport11)                                                                                                                                                                                                                                                                                                                                                                                                                                                     | 14.19  | 24.71   | 0.57 | 2.05E-05 | 6.46E-04 |
| 181 | 1 | L1-3 vs. M1-3 | 248746_at  | AT5G47890 | NADH-ubiquinone oxidoreductase B8 subunit;(source:Araport11)                                                                                                                                                                                                                                                                                                                                                                                                                                                            | 133.04 | 231.95  | 0.57 | 6.99E-05 | 1.61E-03 |
| 182 | 1 | L1-3 vs. M1-3 | 249751_at  | AT5G24650 | HP30/Tric1 is a component of the mitochondrial protein translocation complex and is involved in tRNA transport along with HP30-2/Tric2.It interacts with several members of the TOM complex such as TOM40 and this interaction is mediated by the SAM domain.                                                                                                                                                                                                                                                           | 68.26  | 118.95  | 0.57 | 7.62E-05 | 1.73E-03 |
| 183 | 1 | L1-3 vs. M1-3 | 258851_at  | AT3G03190 | Encodes glutathione transferase belonging to the phi class of GSTs. Naming convention according to Wagner et al. (2002).                                                                                                                                                                                                                                                                                                                                                                                                | 11.60  | 20.43   | 0.57 | 7.86E-05 | 1.77E-03 |
| 184 | 1 | L1-3 vs. M1-3 | 247338_at  | AT5G63680 | Pyruvate kinase family protein;(source:Araport11)                                                                                                                                                                                                                                                                                                                                                                                                                                                                       | 32.47  | 56.82   | 0.57 | 1.23E-04 | 2.45E-03 |
| 185 | 1 | L1-3 vs. M1-3 | 260993_at  | AT1G12140 | belongs to the flavin-monooxygenase (FMO) family, encodes a glucosinolate S-oxygenase that catalyzes the conversion of methylthioalkyl glucosinolates to methylsulfinylalkyl glucosinolates                                                                                                                                                                                                                                                                                                                             | 86.23  | 150.00  | 0.57 | 1.37E-04 | 2.64E-03 |
| 186 | 1 | L1-3 vs. M1-3 | 262558_at  | AT1G31335 | transmembrane protein;(source:Araport11)                                                                                                                                                                                                                                                                                                                                                                                                                                                                                | 51.25  | 90.06   | 0.57 | 2.82E-04 | 4.21E-03 |
| 187 | 1 | L1-3 vs. M1-3 | 262536_at  | AT1G17100 | SOUL heme-binding family protein;(source:Araport11)                                                                                                                                                                                                                                                                                                                                                                                                                                                                     | 50.07  | 87.19   | 0.57 | 2.93E-04 | 4.28E-03 |
| 188 | 1 | L1-3 vs. M1-3 | 253987_at  | AT4G26270 | phosphofructokinase 3;(source:Araport11)<br>Part of multi-protein complex, acting as guanine nucleotide exchange factors (GEFs) and possibly as tethers, regulating intracellular trafficking.                                                                                                                                                                                                                                                                                                                          | 120.69 | 211.64  | 0.57 | 5.61E-04 | 6.50E-03 |
| 189 | 1 | L1-3 vs. M1-3 | 259085_at  | AT3G05000 | Cytochrome C assembly protein;(source:Araport11)                                                                                                                                                                                                                                                                                                                                                                                                                                                                        | 66.60  | 116.84  | 0.57 | 9.90E-04 | 9.89E-03 |
| 190 | 1 | L1-3 vs. M1-3 | 244961_at  | ATCG01040 | Pectin lyase-like superfamily protein;(source:Araport11)                                                                                                                                                                                                                                                                                                                                                                                                                                                                | 645.34 | 1152.46 | 0.56 | 1.80E-06 | 1.42E-04 |
| 191 | 1 | L1-3 vs. M1-3 | 256038_at  | AT1G19170 |                                                                                                                                                                                                                                                                                                                                                                                                                                                                                                                         | 11.75  | 20.92   | 0.56 | 3.20E-06 | 2.06E-04 |
| 192 | 1 | L1-3 vs. M1-3 | 252363_at  | AT3G48460 | GDSL-motif esterase/acyltransferase/lipase. Enzyme group with broad substrate specificity that may catalyze acyltransfer or hydrolase reactions with lipid and non-lipid substrates.                                                                                                                                                                                                                                                                                                                                    | 13.94  | 25.06   | 0.56 | 2.89E-04 | 4.27E-03 |
| 193 | 1 | L1-3 vs. M1-3 | 244972_at  | ATCG00680 | encodes for CP47, subunit of the photosystem II reaction center.<br>encodes a 2-alkenal reductase (EC 1.3.1.74), plays a key role in the detoxification of reactive carbonyls                                                                                                                                                                                                                                                                                                                                           | 72.97  | 129.61  | 0.56 | 7.77E-04 | 8.29E-03 |
| 194 | 1 | L1-3 vs. M1-3 | 246463_at  | AT5G16970 | alpha/beta-Hydrolases superfamily protein;(source:Araport11)                                                                                                                                                                                                                                                                                                                                                                                                                                                            | 50.18  | 91.25   | 0.55 | 2.50E-04 | 3.87E-03 |
| 195 | 1 | L1-3 vs. M1-3 | 262786_at  | AT1G10740 | Phenazine biosynthesis PhzC/PhzF protein;(source:Araport11)                                                                                                                                                                                                                                                                                                                                                                                                                                                             | 13.37  | 24.34   | 0.55 | 4.68E-04 | 5.88E-03 |
| 196 | 1 | L1-3 vs. M1-3 | 264355_at  | AT1G03210 |                                                                                                                                                                                                                                                                                                                                                                                                                                                                                                                         | 70.00  | 130.60  | 0.54 | 2.08E-05 | 6.49E-04 |

|     |   |               |           |           |                                                                                                                                                                                                                                                                                                                                                                                                                                                                                                                                                                                                                                                                                                                                                                                                                                                                                 |        |        |      |          |          |
|-----|---|---------------|-----------|-----------|---------------------------------------------------------------------------------------------------------------------------------------------------------------------------------------------------------------------------------------------------------------------------------------------------------------------------------------------------------------------------------------------------------------------------------------------------------------------------------------------------------------------------------------------------------------------------------------------------------------------------------------------------------------------------------------------------------------------------------------------------------------------------------------------------------------------------------------------------------------------------------|--------|--------|------|----------|----------|
| 197 | 1 | L1-3 vs. M1-3 | 247429_at | AT5G62620 | Encodes a Golgi-localized hydroxyproline-O-galactosyltransferase. Mutants display multiple phenotypes including reduced seed coat mucilage and accelerated leaf senescence.<br>Putative methyltransferase family protein;(source:Araport11)                                                                                                                                                                                                                                                                                                                                                                                                                                                                                                                                                                                                                                     | 114.17 | 211.24 | 0.54 | 6.81E-05 | 1.60E-03 |
| 198 | 1 | L1-3 vs. M1-3 | 245316_at | AT4G14000 |                                                                                                                                                                                                                                                                                                                                                                                                                                                                                                                                                                                                                                                                                                                                                                                                                                                                                 | 163.74 | 305.19 | 0.54 | 1.81E-04 | 3.17E-03 |
| 199 | 1 | L1-3 vs. M1-3 | 264646_at | AT1G08860 | Encodes a copine-like protein, which is a member of a newly identified class of calcium-dependent, phospholipid binding proteins that are present in a wide range of organisms. Overexpression of this gene suppresses bon1-1 phenotypes. Double mutant analyses with bon1-1 suggest that BON1 and BON3 have overlapping functions in maintaining cellular homeostasis and inhibiting cell death. Pentatricopeptide Repeat Protein containing the DYW motif. Required for editing of multiple plastid transcripts. Endonuclease activity.<br>Encodes protease I (pp1)-like protein YLS5.<br>Encodes ABCC13/MRP11, a member of the multidrug resistance associated protein MRP/ABCC subfamily. Its expression is induced by gibberellic acid and downregulated by naphthalene acetic acid, abscisic acid, and zeatin.<br>Gibberellin-regulated family protein;(source:Araport11) | 34.26  | 63.55  | 0.54 | 2.36E-04 | 3.74E-03 |
| 200 | 1 | L1-3 vs. M1-3 | 262509_at | AT1G11290 |                                                                                                                                                                                                                                                                                                                                                                                                                                                                                                                                                                                                                                                                                                                                                                                                                                                                                 | 56.97  | 108.13 | 0.53 | 2.20E-06 | 1.64E-04 |
| 201 | 1 | L1-3 vs. M1-3 | 266167_at | AT2G38860 |                                                                                                                                                                                                                                                                                                                                                                                                                                                                                                                                                                                                                                                                                                                                                                                                                                                                                 | 79.50  | 149.14 | 0.53 | 6.96E-04 | 7.56E-03 |
| 202 | 1 | L1-3 vs. M1-3 | 266038_at | AT2G07680 | DNA-directed RNA polymerase II subunit RPB1-like protein;(source:Araport11)                                                                                                                                                                                                                                                                                                                                                                                                                                                                                                                                                                                                                                                                                                                                                                                                     | 22.24  | 42.58  | 0.52 | 7.90E-06 | 3.60E-04 |
| 203 | 1 | L1-3 vs. M1-3 | 266613_at | AT2G14900 |                                                                                                                                                                                                                                                                                                                                                                                                                                                                                                                                                                                                                                                                                                                                                                                                                                                                                 | 197.31 | 376.69 | 0.52 | 1.45E-05 | 5.34E-04 |
| 204 | 1 | L1-3 vs. M1-3 | 252163_at | AT3G50610 |                                                                                                                                                                                                                                                                                                                                                                                                                                                                                                                                                                                                                                                                                                                                                                                                                                                                                 | 12.72  | 24.69  | 0.52 | 1.70E-05 | 5.78E-04 |
| 205 | 1 | L1-3 vs. M1-3 | 252883_at | AT4G39520 | Encodes a member of the DRG (developmentally regulated G-protein) family. Has GTPase activity. B-cell receptor-associated-like protein;(source:Araport11)<br>Pmr5/Cas1p GD5L/SGNH-like acyl-esterase family protein;(source:Araport11)<br>Nuclear transport factor 2 (NTF2) family protein;(source:Araport11)<br>Sphingomyelin synthetase family protein;(source:Araport11)                                                                                                                                                                                                                                                                                                                                                                                                                                                                                                     | 45.85  | 87.54  | 0.52 | 1.39E-04 | 2.66E-03 |
| 206 | 1 | L1-3 vs. M1-3 | 258875_at | AT3G03160 |                                                                                                                                                                                                                                                                                                                                                                                                                                                                                                                                                                                                                                                                                                                                                                                                                                                                                 | 146.34 | 279.08 | 0.52 | 6.24E-04 | 7.06E-03 |
| 207 | 1 | L1-3 vs. M1-3 | 258864_at | AT3G03210 |                                                                                                                                                                                                                                                                                                                                                                                                                                                                                                                                                                                                                                                                                                                                                                                                                                                                                 | 52.55  | 102.39 | 0.51 | 7.60E-06 | 3.59E-04 |
| 208 | 1 | L1-3 vs. M1-3 | 254953_at | AT4G10925 |                                                                                                                                                                                                                                                                                                                                                                                                                                                                                                                                                                                                                                                                                                                                                                                                                                                                                 | 101.95 | 200.02 | 0.51 | 1.62E-05 | 5.71E-04 |
| 209 | 1 | L1-3 vs. M1-3 | 262725_at | AT1G43580 |                                                                                                                                                                                                                                                                                                                                                                                                                                                                                                                                                                                                                                                                                                                                                                                                                                                                                 | 28.95  | 57.17  | 0.51 | 8.45E-05 | 1.86E-03 |
| 210 | 1 | L1-3 vs. M1-3 | 259625_at | AT1G42970 | Encodes chloroplast localized glyceraldehyde-3-phosphate dehydrogenase that can use both NADH and NADPH to reduce 1,3-diphosphate glycerate. It forms A2B2 heterotetramers with GapA forms of the GADPH enzyme. These complexes are active in the light under reducing conditions, but show reduced NADPH-dependent activity in response to oxidized thioredoxins and increased NAD(H)/NADP(H) ratios due to the formation of inactive A8B8 hexadecamers. The mRNA is cell-to-cell mobile.<br>Pentatricopeptide repeat (PPR) superfamily protein;(source:Araport11)<br>DYNAMIN-like 1B;(source:Araport11)<br>Eukaryotic aspartyl protease family protein;(source:Araport11)<br>Ribosomal protein L39 family protein;(source:Araport11)                                                                                                                                          | 129.54 | 255.19 | 0.51 | 3.98E-04 | 5.44E-03 |
| 211 | 1 | L1-3 vs. M1-3 | 259003_at | AT3G02010 |                                                                                                                                                                                                                                                                                                                                                                                                                                                                                                                                                                                                                                                                                                                                                                                                                                                                                 | 88.44  | 177.42 | 0.50 | 3.26E-05 | 9.22E-04 |
| 212 | 1 | L1-3 vs. M1-3 | 251277_at | AT3G61760 |                                                                                                                                                                                                                                                                                                                                                                                                                                                                                                                                                                                                                                                                                                                                                                                                                                                                                 | 10.72  | 21.53  | 0.50 | 1.61E-04 | 2.97E-03 |
| 213 | 1 | L1-3 vs. M1-3 | 263108_at | AT1G65240 |                                                                                                                                                                                                                                                                                                                                                                                                                                                                                                                                                                                                                                                                                                                                                                                                                                                                                 | 17.65  | 35.16  | 0.50 | 5.37E-04 | 6.29E-03 |
| 214 | 1 | L1-3 vs. M1-3 | 259130_at | AT3G02190 |                                                                                                                                                                                                                                                                                                                                                                                                                                                                                                                                                                                                                                                                                                                                                                                                                                                                                 | 120.22 | 243.45 | 0.49 | 1.31E-05 | 5.02E-04 |
| 215 | 1 | L1-3 vs. M1-3 | 256629_at | AT3G19980 | Encodes catalytic subunit of serine/threonine protein phosphatase 2A. It can associate with phytochromes A and B in vitro. Mutant plants display an accelerated flowering phenotype. Acts antagonistically to SnRK2 to regulate ABI5 phosphorylation. It interacts with NRP which results in tethering to endosomes leading to its degradation.<br>Encodes a protein with biochemical, structural, and biophysical characteristics of a NEET protein. It plays a key role in plant development, senescence, reactive oxygen homeostasis, and Fe metabolism.                                                                                                                                                                                                                                                                                                                     | 54.76  | 112.23 | 0.49 | 6.54E-05 | 1.57E-03 |
| 216 | 1 | L1-3 vs. M1-3 | 248377_at | AT5G51720 |                                                                                                                                                                                                                                                                                                                                                                                                                                                                                                                                                                                                                                                                                                                                                                                                                                                                                 | 40.68  | 82.85  | 0.49 | 6.77E-05 | 1.60E-03 |
| 217 | 1 | L1-3 vs. M1-3 | 251796_at | AT3G55360 | Enoyl-CoA reductase is involved in all very long chain fatty acids (VLCFA) elongation reactions that are required for cuticular wax, storage lipid and sphingolipid metabolism. The protein is located in the ER, but in contrast to its yeast homolog TSC13 is not particularly enriched in the nuclear envelope-vacuole junction. Mutants in this gene show abnormal organ morphology and stem glossiness. Cells in all tissues are only about 1/3 of the size of wild type cells. The morphological changes are most likely to result from the reduction in the VLCFA content of sphingolipids. Mutants also show abnormalities in the endocytic membrane organization and transport as well as reduced trichome papillae.<br>PQ-loop repeat family protein / transmembrane family protein;(source:Araport11)                                                                | 117.51 | 240.80 | 0.49 | 1.94E-04 | 3.29E-03 |
| 218 | 1 | L1-3 vs. M1-3 | 249373_at | AT5G40670 |                                                                                                                                                                                                                                                                                                                                                                                                                                                                                                                                                                                                                                                                                                                                                                                                                                                                                 | 20.29  | 41.24  | 0.49 | 4.12E-04 | 5.54E-03 |
| 219 | 1 | L1-3 vs. M1-3 | 248697_at | AT5G48370 | Thioesterase/thiol ester dehydrase-isomerase superfamily protein;(source:Araport11)                                                                                                                                                                                                                                                                                                                                                                                                                                                                                                                                                                                                                                                                                                                                                                                             | 9.90   | 20.12  | 0.49 | 4.63E-04 | 5.86E-03 |
| 220 | 1 | L1-3 vs. M1-3 | 257141_at | AT3G28900 | Ribosomal protein L34e superfamily protein;(source:Araport11)                                                                                                                                                                                                                                                                                                                                                                                                                                                                                                                                                                                                                                                                                                                                                                                                                   | 88.86  | 181.50 | 0.49 | 5.49E-04 | 6.39E-03 |



|     |   |               |           |           |                                                                                                                                                                                                                                                                                                                                                                                                                                                                                                                                                                                                                                                                                                                                        |        |        |      |          |          |
|-----|---|---------------|-----------|-----------|----------------------------------------------------------------------------------------------------------------------------------------------------------------------------------------------------------------------------------------------------------------------------------------------------------------------------------------------------------------------------------------------------------------------------------------------------------------------------------------------------------------------------------------------------------------------------------------------------------------------------------------------------------------------------------------------------------------------------------------|--------|--------|------|----------|----------|
|     |   |               |           |           | Encodes a chloroplastic copper/zinc superoxide dismutase CSD2 that can detoxify superoxide radicals. Its expression is affected by miR398-directed mRNA cleavage. Activation depends totally on CCS. Overexpression of a miR398-resistant form of CSD2 leads to more dramatic improvements in stress (high light, Cu2+ and methyl viologen) tolerance than overexpression of wild-type CSD2.                                                                                                                                                                                                                                                                                                                                           |        |        |      |          |          |
| 221 | 1 | L1-3 vs. M1-3 | 266165_at | AT2G28190 | The mRNA is cell-to-cell mobile.                                                                                                                                                                                                                                                                                                                                                                                                                                                                                                                                                                                                                                                                                                       | 320.92 | 651.23 | 0.49 | 6.50E-04 | 7.29E-03 |
| 222 | 1 | L1-3 vs. M1-3 | 264262_at | AT1G09200 | Histone superfamily protein;(source:Araport11)                                                                                                                                                                                                                                                                                                                                                                                                                                                                                                                                                                                                                                                                                         | 187.34 | 393.32 | 0.48 | 1.24E-04 | 2.45E-03 |
| 223 | 1 | L1-3 vs. M1-3 | 248114_at | AT5G55370 | MBOAT (membrane bound O-acyl transferase) family protein;(source:Araport11)                                                                                                                                                                                                                                                                                                                                                                                                                                                                                                                                                                                                                                                            | 11.20  | 23.47  | 0.48 | 1.95E-04 | 3.30E-03 |
| 224 | 1 | L1-3 vs. M1-3 | 245631_at | AT1G25350 | glutamine-tRNA ligase, putative / glutaminyl-tRNA synthetase, putative / GlnRS;(source:Araport11)                                                                                                                                                                                                                                                                                                                                                                                                                                                                                                                                                                                                                                      | 27.21  | 56.72  | 0.48 | 2.69E-04 | 4.08E-03 |
| 225 | 1 | L1-3 vs. M1-3 | 247267_at | AT5G64140 | Encodes a putative ribosomal protein S28.                                                                                                                                                                                                                                                                                                                                                                                                                                                                                                                                                                                                                                                                                              | 20.04  | 42.33  | 0.47 | 9.79E-05 | 2.09E-03 |
| 226 | 1 | L1-3 vs. M1-3 | 248526_at | AT5G50740 | Heavy metal transport/detoxification superfamily protein;(source:Araport11)                                                                                                                                                                                                                                                                                                                                                                                                                                                                                                                                                                                                                                                            | 177.53 | 373.78 | 0.47 | 4.00E-04 | 5.44E-03 |
| 227 | 1 | L1-3 vs. M1-3 | 261655_at | AT1G01940 | Cyclophilin-like peptidyl-prolyl cis-trans isomerase family protein;(source:Araport11)                                                                                                                                                                                                                                                                                                                                                                                                                                                                                                                                                                                                                                                 | 367.16 | 794.05 | 0.46 | 1.20E-06 | 1.06E-04 |
| 228 | 1 | L1-3 vs. M1-3 | 252946_at | AT4G39235 | hypothetical protein;(source:Araport11)                                                                                                                                                                                                                                                                                                                                                                                                                                                                                                                                                                                                                                                                                                | 13.33  | 28.75  | 0.46 | 4.36E-05 | 1.17E-03 |
| 229 | 1 | L1-3 vs. M1-3 | 267618_at | AT2G26760 | Cyclin B1;(source:Araport11)                                                                                                                                                                                                                                                                                                                                                                                                                                                                                                                                                                                                                                                                                                           | 31.30  | 67.58  | 0.46 | 1.69E-04 | 3.04E-03 |
| 230 | 1 | L1-3 vs. M1-3 | 251089_at | AT5G01390 | DNAJ heat shock family protein;(source:Araport11)                                                                                                                                                                                                                                                                                                                                                                                                                                                                                                                                                                                                                                                                                      | 19.80  | 44.26  | 0.45 | 2.12E-04 | 3.43E-03 |
| 231 | 1 | L1-3 vs. M1-3 | 251021_at | AT5G02140 | Pathogenesis-related thaumatin superfamily protein;(source:Araport11)                                                                                                                                                                                                                                                                                                                                                                                                                                                                                                                                                                                                                                                                  | 19.08  | 43.71  | 0.44 | 1.01E-05 | 4.09E-04 |
| 232 | 1 | L1-3 vs. M1-3 | 247185_at | AT5G65460 | Kinesin that binds cyclin-dependent kinase CDKA1 as homodimer or as heterodimer with KCA1                                                                                                                                                                                                                                                                                                                                                                                                                                                                                                                                                                                                                                              | 19.29  | 44.17  | 0.44 | 2.05E-05 | 6.46E-04 |
|     |   |               |           |           | A-type cyclin-dependent kinase. Together with its specific inhibitor, the Kip-related protein, KRP2 they regulate the mitosis-to-endocycle transition during leaf development. Dominant negative mutations abolish cell division. Loss of function phenotype has reduced fertility with failure to transmit via pollen. Pollen development is arrested at the second mitotic division. Expression is regulated by environmental and chemical signals. Part of the promoter is responsible for expression in trichomes. Functions as a positive regulator of cell proliferation during development of the male gametophyte, embryo and endosperm. Phosphorylation of threonine 161 is required for activation of its associated kinase. |        |        |      |          |          |
| 233 | 1 | L1-3 vs. M1-3 | 252337_at | AT3G48750 | encodes a cytosolic thioredoxin that reduces disulfide bridges of target proteins by the reversible formation of a disulfide bridge between two neighboring Cys residues present in the active site. Thioredoxins have been found to regulate a variety of biological reactions in prokaryotic and eukaryotic cells.                                                                                                                                                                                                                                                                                                                                                                                                                   | 82.00  | 186.47 | 0.44 | 1.59E-04 | 2.96E-03 |
| 234 | 1 | L1-3 vs. M1-3 | 260943_at | AT1G45145 | Encodes a protein with in vitro AMP deaminase activity that is involved in embryogenesis.                                                                                                                                                                                                                                                                                                                                                                                                                                                                                                                                                                                                                                              | 23.15  | 53.24  | 0.43 | 1.11E-04 | 2.27E-03 |
| 235 | 1 | L1-3 vs. M1-3 | 267095_at | AT2G38280 | Homozygous mutant embryos fail to develop past the zygote stage.                                                                                                                                                                                                                                                                                                                                                                                                                                                                                                                                                                                                                                                                       | 115.73 | 268.79 | 0.43 | 8.66E-04 | 8.90E-03 |
| 236 | 1 | L1-3 vs. M1-3 | 264443_at | AT1G27385 | phosphoribosylformylglycinamide synthase;(source:Araport11)<br>Encodes an isoform of UDP-glucuronic acid decarboxylase, which is predicted to be membrane-bound by PSORT analysis. This enzyme produces UDP-xylose, which is a substrate for many cell wall carbohydrates including hemicellulose and pectin. UDP-xylose is also known to feedback regulate several cell wall biosynthetic enzymes.                                                                                                                                                                                                                                                                                                                                    | 74.92  | 180.16 | 0.42 | 1.10E-06 | 1.01E-04 |
| 237 | 1 | L1-3 vs. M1-3 | 251945_at | AT3G53520 | phosphofructokinase 7;(source:Araport11)                                                                                                                                                                                                                                                                                                                                                                                                                                                                                                                                                                                                                                                                                               | 26.62  | 63.64  | 0.42 | 1.44E-05 | 5.34E-04 |
| 238 | 1 | L1-3 vs. M1-3 | 247983_at | AT5G56630 | 3-methylglutaconyl-CoA hydratase localized to mitochondria. Knockout displays accelerated senescence when subjected to extended dark conditions;knockout senescing leaves and knockout seeds accumulate leu, ile, and val.                                                                                                                                                                                                                                                                                                                                                                                                                                                                                                             | 212.89 | 502.41 | 0.42 | 5.55E-05 | 1.42E-03 |
| 239 | 1 | L1-3 vs. M1-3 | 245446_at | AT4G16800 | Nuclear transcribed, plastid localized EF-Tu translation elongation factor. Referred to as AtRabE1b in DOI:10.1104/pp.013052. However, wider community usage and more publications assign the symbol RabE1b to At5g59840.                                                                                                                                                                                                                                                                                                                                                                                                                                                                                                              | 49.32  | 121.38 | 0.41 | 2.49E-04 | 3.87E-03 |
| 240 | 1 | L1-3 vs. M1-3 | 254480_at | AT4G20360 | nuclear matrix protein;(source:Araport11)                                                                                                                                                                                                                                                                                                                                                                                                                                                                                                                                                                                                                                                                                              | 42.25  | 106.75 | 0.40 | 2.00E-07 | 3.78E-05 |
| 241 | 1 | L1-3 vs. M1-3 | 246443_at | AT5G17620 | NAD(P)-binding Rossmann-fold superfamily protein;(source:Araport11)                                                                                                                                                                                                                                                                                                                                                                                                                                                                                                                                                                                                                                                                    | 83.46  | 209.64 | 0.40 | 5.00E-06 | 2.73E-04 |
| 242 | 1 | L1-3 vs. M1-3 | 258976_at | AT3G01980 | Encodes PNP-A (Plant Natriuretic Peptide A). PNPs are a class of systemically mobile molecules distantly related to expansins; their biological role has remained elusive. PNP-A contains a signal peptide domain and is secreted into the extracellular space. Co-expression analyses using microarray data suggest that PNP-A may function as a component of plant defence response and SAR in particular, and could be classified as a newly identified PR protein. It is stress responsive and can enhance its own expression.                                                                                                                                                                                                     | 61.67  | 153.20 | 0.40 | 1.01E-05 | 4.09E-04 |
| 243 | 1 | L1-3 vs. M1-3 | 266070_at | AT2G18660 |                                                                                                                                                                                                                                                                                                                                                                                                                                                                                                                                                                                                                                                                                                                                        | 31.23  | 77.37  | 0.40 | 1.31E-05 | 5.02E-04 |

|     |   |               |            |           |                                                                                                                                                                                                                                                                                                                                                                                                                                                                                                                                                                                                                                                                                                                                                                                                                                                                                                                                                                                                                    |        |         |      |          |          |
|-----|---|---------------|------------|-----------|--------------------------------------------------------------------------------------------------------------------------------------------------------------------------------------------------------------------------------------------------------------------------------------------------------------------------------------------------------------------------------------------------------------------------------------------------------------------------------------------------------------------------------------------------------------------------------------------------------------------------------------------------------------------------------------------------------------------------------------------------------------------------------------------------------------------------------------------------------------------------------------------------------------------------------------------------------------------------------------------------------------------|--------|---------|------|----------|----------|
| 244 | 1 | L1-3 vs. M1-3 | 264052_at  | AT2G22330 | Encodes a cytochrome P450. Involved in tryptophan metabolism. Converts Trp to indole-3-acetaldoxime (IAOx), a precursor to IAA and indole glucosinolates. The mRNA is cell-to-cell mobile.                                                                                                                                                                                                                                                                                                                                                                                                                                                                                                                                                                                                                                                                                                                                                                                                                         | 21.11  | 52.44   | 0.40 | 1.95E-05 | 6.36E-04 |
| 245 | 1 | L1-3 vs. M1-3 | 246408_at  | AT1G57680 | plasminogen activator inhibitor;(source:Araport11)<br>meiotic asynaptic mutant 1 (ASY1). ASY1 protein is initially distributed as numerous foci throughout the chromatin. During early G2, the foci are juxtaposed to the nascent chromosome axes to form a continuous axis associated signal.                                                                                                                                                                                                                                                                                                                                                                                                                                                                                                                                                                                                                                                                                                                     | 199.77 | 497.84  | 0.40 | 6.14E-05 | 1.53E-03 |
| 246 | 1 | L1-3 vs. M1-3 | 264972_at  | AT1G67370 | Encodes a member of the GATA factor family of zinc finger transcription factors.                                                                                                                                                                                                                                                                                                                                                                                                                                                                                                                                                                                                                                                                                                                                                                                                                                                                                                                                   | 18.31  | 45.69   | 0.40 | 1.14E-04 | 2.33E-03 |
| 247 | 1 | L1-3 vs. M1-3 | 256916_at  | AT3G24050 |                                                                                                                                                                                                                                                                                                                                                                                                                                                                                                                                                                                                                                                                                                                                                                                                                                                                                                                                                                                                                    | 12.60  | 31.91   | 0.40 | 3.01E-04 | 4.35E-03 |
| 248 | 1 | L1-3 vs. M1-3 | 260976_at  | AT1G53650 | RNA-binding protein, putative, similar to RNA-binding protein GB:AAA86641 GI:1174153 from ( <i>Arabidopsis thaliana</i> ). Contains PAB2 domain which facilitates binding to PABC proteins.                                                                                                                                                                                                                                                                                                                                                                                                                                                                                                                                                                                                                                                                                                                                                                                                                        | 57.53  | 150.07  | 0.38 | 2.58E-04 | 3.96E-03 |
| 249 | 1 | L1-3 vs. M1-3 | 252272_at  | AT3G49670 | Encodes a CLAVATA1-related receptor kinase-like protein required for both shoot and flower meristem function. Very similar to BAM1, with more than 85% a.a. identity. It has a broad expression pattern and is involved in vascular strand development in the leaf, control of leaf shape, size and symmetry, male gametophyte development and ovule specification and function. Anthers of double mutants (bam1bam2) appeared abnormal at a very early stage and lack the endothecium, middle, and tapetum layers. Further analyses revealed that cells interior to the epidermis (in anther tissue) acquire some characteristics of pollen mother cells (PMCs), suggesting defects in cell fate specification. The pollen mother-like cells degenerate before the completion of meiosis, suggesting that these cells are defective. In addition, the BAM2 expression pattern supports both an early role in promoting somatic cell fates and a subsequent function in the PMCs. The mRNA is cell-to-cell mobile. | 24.76  | 66.78   | 0.37 | 1.63E-05 | 5.71E-04 |
| 250 | 1 | L1-3 vs. M1-3 | 263679_at  | AT1G59990 | DEA(D/H)-box RNA helicase family protein;(source:Araport11)<br>Part of the AtHVA22 family. Protein expression is ABA- and stress-inducible. The mRNA is cell-to-cell mobile.                                                                                                                                                                                                                                                                                                                                                                                                                                                                                                                                                                                                                                                                                                                                                                                                                                       | 19.44  | 53.05   | 0.37 | 1.56E-04 | 2.94E-03 |
| 251 | 1 | L1-3 vs. M1-3 | 260368_at  | AT1G69700 | <i>Arabidopsis thaliana</i> aldehyde dehydrogenase AtALDH1a mRNA. a sinapaldehyde dehydrogenase catalyzes both the oxidation of coniferylaldehyde and sinapaldehyde forming ferulic acid and sinapic acid, respectively                                                                                                                                                                                                                                                                                                                                                                                                                                                                                                                                                                                                                                                                                                                                                                                            | 24.32  | 65.28   | 0.37 | 5.08E-04 | 6.16E-03 |
| 252 | 1 | L1-3 vs. M1-3 | 258140_at  | AT3G24503 | Putative flavin monooxygenase.                                                                                                                                                                                                                                                                                                                                                                                                                                                                                                                                                                                                                                                                                                                                                                                                                                                                                                                                                                                     | 60.80  | 168.09  | 0.36 | 1.00E-05 | 4.09E-04 |
| 253 | 1 | L1-3 vs. M1-3 | 261023_at  | AT1G12200 | EXS (ERD1/XPR1/SYG1) family protein;(source:Araport11)                                                                                                                                                                                                                                                                                                                                                                                                                                                                                                                                                                                                                                                                                                                                                                                                                                                                                                                                                             | 10.51  | 29.00   | 0.36 | 1.71E-05 | 5.78E-04 |
| 254 | 1 | L1-3 vs. M1-3 | 266732_at  | AT2G03240 | Chaperone DnaJ-domain superfamily protein;(source:Araport11)                                                                                                                                                                                                                                                                                                                                                                                                                                                                                                                                                                                                                                                                                                                                                                                                                                                                                                                                                       | 35.66  | 102.25  | 0.35 | 9.10E-06 | 3.97E-04 |
| 255 | 1 | L1-3 vs. M1-3 | 258716_at  | AT3G09700 | Pectinacetyltransferase family protein;(source:Araport11)                                                                                                                                                                                                                                                                                                                                                                                                                                                                                                                                                                                                                                                                                                                                                                                                                                                                                                                                                          | 33.69  | 96.44   | 0.35 | 2.01E-05 | 6.46E-04 |
| 256 | 1 | L1-3 vs. M1-3 | 254578_at  | AT4G19410 | Encodes a cytosolic copper/zinc superoxide dismutase CSD1 that can detoxify superoxide radicals. Its expression is affected by miR398-directed mRNA cleavage. Regulated by biotic and abiotic stress. Activation of CSD1 in the cytoplasm involves both a CCS-dependent and -independent pathway.                                                                                                                                                                                                                                                                                                                                                                                                                                                                                                                                                                                                                                                                                                                  | 122.96 | 355.69  | 0.35 | 1.18E-04 | 2.37E-03 |
| 257 | 1 | L1-3 vs. M1-3 | 264809_at  | AT1G08830 | alpha/beta-Hydrolases superfamily protein;(source:Araport11)                                                                                                                                                                                                                                                                                                                                                                                                                                                                                                                                                                                                                                                                                                                                                                                                                                                                                                                                                       | 314.80 | 890.86  | 0.35 | 2.97E-04 | 4.32E-03 |
| 258 | 1 | L1-3 vs. M1-3 | 260297_at  | AT1G80280 | encodes a chloroplast ribosomal protein L20, a constituent of the large subunit of the ribosomal complex                                                                                                                                                                                                                                                                                                                                                                                                                                                                                                                                                                                                                                                                                                                                                                                                                                                                                                           | 15.51  | 44.89   | 0.35 | 4.42E-04 | 5.72E-03 |
| 259 | 1 | L1-3 vs. M1-3 | 244970_at  | ATCG00660 | member of SMC subfamily                                                                                                                                                                                                                                                                                                                                                                                                                                                                                                                                                                                                                                                                                                                                                                                                                                                                                                                                                                                            | 106.58 | 317.21  | 0.34 | 1.74E-04 | 3.10E-03 |
| 260 | 1 | L1-3 vs. M1-3 | 248658_at  | AT5G48600 | hypothetical protein;(source:Araport11)                                                                                                                                                                                                                                                                                                                                                                                                                                                                                                                                                                                                                                                                                                                                                                                                                                                                                                                                                                            | 23.56  | 74.50   | 0.32 | 2.06E-04 | 3.40E-03 |
| 261 | 1 | L1-3 vs. M1-3 | 263151_at  | AT1G54120 | Zinc-binding alcohol dehydrogenase family protein;(source:Araport11)                                                                                                                                                                                                                                                                                                                                                                                                                                                                                                                                                                                                                                                                                                                                                                                                                                                                                                                                               | 39.34  | 135.44  | 0.29 | < 1e-07  | < 1e-07  |
| 262 | 1 | L1-3 vs. M1-3 | 249242_at  | AT5G42250 | Encodes glutathione transferase belonging to the phi class of GSTs. Naming convention according to Wagner et al. (2002).                                                                                                                                                                                                                                                                                                                                                                                                                                                                                                                                                                                                                                                                                                                                                                                                                                                                                           | 52.66  | 183.35  | 0.29 | 3.00E-07 | 4.26E-05 |
| 263 | 1 | L1-3 vs. M1-3 | 267153_at  | AT2G30860 | ATPase E1-E2 type family protein / haloacid dehalogenase-like hydrolase family protein;(source:Araport11)                                                                                                                                                                                                                                                                                                                                                                                                                                                                                                                                                                                                                                                                                                                                                                                                                                                                                                          | 400.89 | 1364.81 | 0.29 | 4.00E-07 | 5.41E-05 |
| 264 | 1 | L1-3 vs. M1-3 | 257224_at  | AT3G27870 | Encodes a nitrile-specifier protein NSP4. NSP4 is one out of five (At3g16400/NSP1, At2g33070/NSP2, At3g16390/NSP3, At3g16410/NSP4 and At5g48180/NSP5) <i>A. thaliana</i> epithiospecifier protein (ESP) homologues that promote simple nitrile, but not epithionitrile or thiocyanate formation. The mRNA is cell-to-cell mobile.                                                                                                                                                                                                                                                                                                                                                                                                                                                                                                                                                                                                                                                                                  | 34.01  | 123.00  | 0.28 | 2.40E-06 | 1.75E-04 |
| 265 | 1 | L1-3 vs. M1-3 | 259381_s_a | AT3G16410 | heat shock protein 70 (Hsp 70) family protein;(source:Araport11)                                                                                                                                                                                                                                                                                                                                                                                                                                                                                                                                                                                                                                                                                                                                                                                                                                                                                                                                                   | 23.38  | 83.88   | 0.28 | 1.59E-05 | 5.71E-04 |
| 266 | 1 | L1-3 vs. M1-3 | 245293_at  | AT4G16660 | member of Receptor kinase-like protein family                                                                                                                                                                                                                                                                                                                                                                                                                                                                                                                                                                                                                                                                                                                                                                                                                                                                                                                                                                      | 22.79  | 81.12   | 0.28 | 6.27E-05 | 1.53E-03 |
| 267 | 1 | L1-3 vs. M1-3 | 256899_at  | AT3G24660 | auxin response mutant (AXR4) The mRNA is cell-to-cell mobile.                                                                                                                                                                                                                                                                                                                                                                                                                                                                                                                                                                                                                                                                                                                                                                                                                                                                                                                                                      | 17.48  | 62.10   | 0.28 | 8.67E-05 | 1.89E-03 |
| 268 | 1 | L1-3 vs. M1-3 | 256322_at  | AT1G54990 | Fatty acid desaturase family protein;(source:Araport11)                                                                                                                                                                                                                                                                                                                                                                                                                                                                                                                                                                                                                                                                                                                                                                                                                                                                                                                                                            | 40.47  | 155.98  | 0.26 | < 1e-07  | 2.58E-05 |
| 269 | 1 | L1-3 vs. M1-3 | 259391_s_a | AT1G06350 | transmembrane protein;(source:Araport11)                                                                                                                                                                                                                                                                                                                                                                                                                                                                                                                                                                                                                                                                                                                                                                                                                                                                                                                                                                           | 200.64 | 782.34  | 0.26 | 3.00E-07 | 4.26E-05 |
| 270 | 1 | L1-3 vs. M1-3 | 257334_at  | ATMG01370 |                                                                                                                                                                                                                                                                                                                                                                                                                                                                                                                                                                                                                                                                                                                                                                                                                                                                                                                                                                                                                    | 135.26 | 515.02  | 0.26 | 2.12E-05 | 6.54E-04 |

|     |   |               |            |           |                                                                                                                                                                                                                                                                                                                                         |         |         |      |          |          |
|-----|---|---------------|------------|-----------|-----------------------------------------------------------------------------------------------------------------------------------------------------------------------------------------------------------------------------------------------------------------------------------------------------------------------------------------|---------|---------|------|----------|----------|
| 271 | 1 | L1-3 vs. M1-3 | 266262_at  | AT2G27590 | S-adenosyl-L-methionine-dependent methyltransferases superfamily protein;(source:Araport11)<br>cytosolic beta-amylase expressed in rosette leaves and inducible by sugar. RAM1 mutants have reduced beta amylase in leaves and stems.                                                                                                   | 26.71   | 102.48  | 0.26 | 6.67E-05 | 1.59E-03 |
| 272 | 1 | L1-3 vs. M1-3 | 245275_at  | AT4G15210 | ATPase subunit 6                                                                                                                                                                                                                                                                                                                        | 115.80  | 463.78  | 0.25 | 9.45E-04 | 9.51E-03 |
| 273 | 1 | L1-3 vs. M1-3 | 266012_s_a | ATMG00410 | Polyubiquitin gene containing 4 ubiquitin repeats.                                                                                                                                                                                                                                                                                      | 176.74  | 756.56  | 0.23 | 3.60E-06 | 2.27E-04 |
| 274 | 1 | L1-3 vs. M1-3 | 255459_at  | AT4G02890 | Chloroplast encoded ribosomal protein S4                                                                                                                                                                                                                                                                                                | 746.67  | 3334.43 | 0.22 | < 1e-07  | < 1e-07  |
| 275 | 1 | L1-3 vs. M1-3 | 245009_at  | ATCG00380 | Encodes a chloroplast envelope Ca2+-ATPase with an N-terminal autoinhibitor.                                                                                                                                                                                                                                                            | 57.10   | 260.15  | 0.22 | 5.10E-06 | 2.73E-04 |
| 276 | 1 | L1-3 vs. M1-3 | 261650_at  | AT1G27770 | nucleobase-ascorbate transporter 7;(source:Araport11)                                                                                                                                                                                                                                                                                   | 21.57   | 102.31  | 0.21 | < 1e-07  | < 1e-07  |
| 277 | 1 | L1-3 vs. M1-3 | 263734_at  | AT1G60030 | Encodes a cold-inducible cationic peroxidase that is involved in the stress response. In response to low temperature, RCI3 transcripts accumulate in the aerial part and in roots of etiolated seedlings but only in roots of light-grown seedlings. The mRNA is cell-to-cell mobile.                                                   | 20.75   | 103.50  | 0.20 | < 1e-07  | < 1e-07  |
| 278 | 1 | L1-3 vs. M1-3 | 264577_at  | AT1G05260 | Encodes an oxime-metabolizing enzyme in the biosynthetic pathway of glucosinolates. Is required for phytochrome signal transduction in red light. Mutation confers auxin overproduction.                                                                                                                                                | 40.00   | 204.24  | 0.20 | 2.20E-06 | 1.64E-04 |
| 279 | 1 | L1-3 vs. M1-3 | 253534_at  | AT4G31500 | PSII L protein                                                                                                                                                                                                                                                                                                                          | 188.35  | 938.18  | 0.20 | 7.20E-06 | 3.51E-04 |
| 280 | 1 | L1-3 vs. M1-3 | 244964_at  | ATCG00560 | Encodes subunit 8 of the mitochondrial F(O) ATP synthase complex.                                                                                                                                                                                                                                                                       | 620.80  | 3316.70 | 0.19 | 2.00E-07 | 3.78E-05 |
| 281 | 1 | L1-3 vs. M1-3 | 265230_s_a | ATMG00480 | member of Synaptobrevin-like protein family                                                                                                                                                                                                                                                                                             | 62.40   | 385.96  | 0.16 | < 1e-07  | < 1e-07  |
| 282 | 1 | L1-3 vs. M1-3 | 261178_at  | AT1G04760 | encodes an acid phosphatase similar to soybean vegetative storage proteins. Gene expression is induced by wounding and jasmonic acid.                                                                                                                                                                                                   | 14.11   | 117.85  | 0.12 | < 1e-07  | < 1e-07  |
| 283 | 1 | L1-3 vs. M1-3 | 245928_s_a | AT5G24780 | Late embryogenesis abundant protein (LEA) family protein;(source:Araport11)                                                                                                                                                                                                                                                             | 30.83   | 709.89  | 0.04 | < 1e-07  | < 1e-07  |
| 284 | 2 | L4 vs. M4     | 248227_at  | AT5G53820 | lectin protein kinase family protein;(source:Araport11)                                                                                                                                                                                                                                                                                 | 98.69   | 15.29   | 6.45 | 1.00E-06 | 1.34E-05 |
| 285 | 2 | L4 vs. M4     | 264223_s_a | AT1G67520 | Fe-superoxide dismutase                                                                                                                                                                                                                                                                                                                 | 137.09  | 21.97   | 6.24 | < 1e-07  | < 1e-07  |
| 286 | 2 | L4 vs. M4     | 254098_at  | AT4G25100 | serine carboxypeptidase-like 9;(source:Araport11)                                                                                                                                                                                                                                                                                       | 265.10  | 44.19   | 6.00 | < 1e-07  | < 1e-07  |
| 287 | 2 | L4 vs. M4     | 267256_s_a | AT2G23010 | Bifunctional inhibitor/lipid-transfer protein/seed storage 2S albumin superfamily protein;(source:Araport11)                                                                                                                                                                                                                            | 198.59  | 38.00   | 5.23 | 1.36E-05 | 5.88E-05 |
| 288 | 2 | L4 vs. M4     | 259063_at  | AT3G07450 | Late embryogenesis abundant protein (LEA) family protein;(source:Araport11)                                                                                                                                                                                                                                                             | 150.71  | 28.98   | 5.20 | 3.00E-07 | 6.20E-06 |
| 289 | 2 | L4 vs. M4     | 249536_at  | AT5G38760 | Encodes AKINbeta1, a subunit of the SnRK1 kinase (Sucrose non-fermenting-1-related protein kinase). Involved in regulation of nitrogen and sugar metabolism. As part of the regulatory subunit, it binds maltose which promotes kinase activity. Acts as a global regulator of genes involved in carbon, lipid and nitrogen metabolism. | 97.79   | 18.91   | 5.17 | < 1e-07  | < 1e-07  |
| 290 | 2 | L4 vs. M4     | 246028_at  | AT5G21170 | Encodes a putative arabinogalactan-protein (AGP23).                                                                                                                                                                                                                                                                                     | 191.15  | 38.03   | 5.03 | 4.80E-06 | 3.41E-05 |
| 291 | 2 | L4 vs. M4     | 251590_at  | AT3G57690 | Proline-rich extensin-like family protein;(source:Araport11)                                                                                                                                                                                                                                                                            | 2528.19 | 505.48  | 5.00 | < 1e-07  | < 1e-07  |
| 292 | 2 | L4 vs. M4     | 247762_at  | AT5G59170 | auxin response factor 12;(source:Araport11)                                                                                                                                                                                                                                                                                             | 888.02  | 178.29  | 4.98 | < 1e-07  | 3.36E-06 |
| 293 | 2 | L4 vs. M4     | 262566_at  | AT1G34310 | Encodes a ferretin protein that is targeted to the chloroplast. Member of a Ferritin gene family. Gene expression is induced in response to iron overload and by nitric oxide. Expression of the gene is downregulated in the presence of paraquat, an inducer of photooxidative stress.                                                | 2402.10 | 501.18  | 4.79 | < 1e-07  | < 1e-07  |
| 294 | 2 | L4 vs. M4     | 251109_at  | AT5G01600 | Proline-rich extensin-like family protein;(source:Araport11)                                                                                                                                                                                                                                                                            | 249.40  | 53.76   | 4.64 | < 1e-07  | 3.36E-06 |
| 295 | 2 | L4 vs. M4     | 257041_at  | AT3G28550 | Pectin lyase-like superfamily protein;(source:Araport11)                                                                                                                                                                                                                                                                                | 249.65  | 56.70   | 4.40 | 1.40E-06 | 1.63E-05 |
| 296 | 2 | L4 vs. M4     | 258686_at  | AT3G07840 | ADF10 is an actin-depolymerizing factor that preferentially binds ADP-G-actin and inhibits G-actin nucleotide exchange. ADF10 promotes actin turnover in pollen, regulating organization of actin filaments and vesicle trafficking during pollen tube growth.                                                                          | 223.75  | 52.12   | 4.29 | 1.80E-06 | 1.90E-05 |
| 297 | 2 | L4 vs. M4     | 248367_at  | AT5G52360 | encodes a major leaf ferredoxin                                                                                                                                                                                                                                                                                                         | 290.03  | 71.11   | 4.08 | < 1e-07  | 3.36E-06 |
| 298 | 2 | L4 vs. M4     | 259727_at  | AT1G60950 | Encodes a member of the SWEET sucrose efflux transporter family proteins, together with RPG1, it is involved in pollen development. Together with SWEET14, it is likely involved in modulating the GA response and is required for proper development of anthers, seeds and seedlings.                                                  | 4882.75 | 1261.89 | 3.87 | 5.00E-06 | 3.46E-05 |
| 299 | 2 | L4 vs. M4     | 248467_at  | AT5G50800 | Methylenetetrahydrofolate reductase family protein;(source:Araport11)                                                                                                                                                                                                                                                                   | 378.23  | 97.72   | 3.87 | 9.00E-07 | 1.29E-05 |
| 300 | 2 | L4 vs. M4     | 249527_at  | AT5G38710 | Quasimodo1, encodes a glycosyltransferase, involved in homogalacturonan biosynthesis; mutant shows cell adhesion defect and lower wall uronic acid content. The mRNA is cell-to-cell mobile.                                                                                                                                            | 248.82  | 67.33   | 3.70 | 8.00E-07 | 1.21E-05 |
| 301 | 2 | L4 vs. M4     | 257816_at  | AT3G25140 |                                                                                                                                                                                                                                                                                                                                         | 316.61  | 87.57   | 3.62 | 8.00E-07 | 1.21E-05 |

|     |   |           |                 |           |                                                                                                                                                                                                                                                                                                                                                                                                                                                                                                                                                                                                                                                                                                                                                                                                     |         |        |      |          |          |
|-----|---|-----------|-----------------|-----------|-----------------------------------------------------------------------------------------------------------------------------------------------------------------------------------------------------------------------------------------------------------------------------------------------------------------------------------------------------------------------------------------------------------------------------------------------------------------------------------------------------------------------------------------------------------------------------------------------------------------------------------------------------------------------------------------------------------------------------------------------------------------------------------------------------|---------|--------|------|----------|----------|
| 302 | 2 | L4 vs. M4 | 253161_at       | AT4G35770 | Senescence-associated gene that is strongly induced by phosphate starvation. Transcripts are differentially regulated at the level of mRNA stability at different times of day. mRNAs are targets of the mRNA degradation pathway mediated by the downstream (DST) instability determinant.                                                                                                                                                                                                                                                                                                                                                                                                                                                                                                         | 150.55  | 42.05  | 3.58 | 2.00E-07 | 5.51E-06 |
| 303 | 2 | L4 vs. M4 | 258751_at       | AT3G05890 | Low temperature and salt responsive protein family;(source:Araport11)                                                                                                                                                                                                                                                                                                                                                                                                                                                                                                                                                                                                                                                                                                                               | 72.51   | 21.00  | 3.45 | 1.38E-05 | 5.88E-05 |
| 304 | 2 | L4 vs. M4 | 245232_at       | AT4G25590 | actin depolymerizing factor 7;(source:Araport11)                                                                                                                                                                                                                                                                                                                                                                                                                                                                                                                                                                                                                                                                                                                                                    | 109.01  | 32.51  | 3.35 | 3.00E-07 | 6.20E-06 |
| 305 | 2 | L4 vs. M4 | 245946_at       | AT5G19580 | glyoxal oxidase-related protein;(source:Araport11)                                                                                                                                                                                                                                                                                                                                                                                                                                                                                                                                                                                                                                                                                                                                                  | 835.90  | 249.30 | 3.35 | 1.10E-06 | 1.44E-05 |
| 306 | 2 | L4 vs. M4 | 265002_at       | AT1G24400 | High-affinity transporter for neutral and acidic amino acids, expressed in tapetum tissue of anthers.                                                                                                                                                                                                                                                                                                                                                                                                                                                                                                                                                                                                                                                                                               | 144.51  | 43.22  | 3.34 | 7.60E-06 | 4.10E-05 |
| 307 | 2 | L4 vs. M4 | 249375_at       | AT5G40730 | Transport of 1-Aminocyclopropane-1-carboxylic acid (ACC).                                                                                                                                                                                                                                                                                                                                                                                                                                                                                                                                                                                                                                                                                                                                           | 845.68  | 256.53 | 3.30 | 2.20E-06 | 2.09E-05 |
| 308 | 2 | L4 vs. M4 | 265552_at       | AT2G07560 | Encodes an arabinogalactan-protein (AGP24).                                                                                                                                                                                                                                                                                                                                                                                                                                                                                                                                                                                                                                                                                                                                                         | 194.22  | 59.01  | 3.29 | 1.00E-07 | 3.36E-06 |
| 309 | 2 | L4 vs. M4 | 257986_at       | AT3G20865 | H[+]-ATPase 6;(source:Araport11)                                                                                                                                                                                                                                                                                                                                                                                                                                                                                                                                                                                                                                                                                                                                                                    | 196.35  | 60.63  | 3.24 | 5.40E-06 | 3.52E-05 |
| 310 | 2 | L4 vs. M4 | 251770_at       | AT3G55970 | Encodes a putative arabinogalactan-protein (AGP40) that is expressed in pollen.                                                                                                                                                                                                                                                                                                                                                                                                                                                                                                                                                                                                                                                                                                                     | 369.60  | 115.00 | 3.21 | 2.30E-06 | 2.09E-05 |
| 311 | 2 | L4 vs. M4 | 262912_at       | AT1G59740 | One of 4 paralogs encoding a 2-oxoglutarate/Fe(II)-dependent oxygenases that hydroxylates JA to 12-OH-JA.                                                                                                                                                                                                                                                                                                                                                                                                                                                                                                                                                                                                                                                                                           | 121.91  | 38.49  | 3.17 | 1.20E-06 | 1.50E-05 |
| 312 | 2 | L4 vs. M4 | 253125_at       | AT4G36040 | Major facilitator superfamily protein;(source:Araport11)                                                                                                                                                                                                                                                                                                                                                                                                                                                                                                                                                                                                                                                                                                                                            | 317.60  | 101.92 | 3.12 | 6.60E-04 | 1.18E-03 |
| 313 | 2 | L4 vs. M4 | 254104_at       | AT4G25040 | Chaperone DnaJ-domain superfamily protein;(source:Araport11)                                                                                                                                                                                                                                                                                                                                                                                                                                                                                                                                                                                                                                                                                                                                        | 106.08  | 34.24  | 3.10 | 3.00E-07 | 6.20E-06 |
| 314 | 2 | L4 vs. M4 | 256955_at       | AT3G13390 | Uncharacterized protein family (UPF0497);(source:Araport11)                                                                                                                                                                                                                                                                                                                                                                                                                                                                                                                                                                                                                                                                                                                                         | 123.65  | 40.08  | 3.09 | 4.50E-06 | 3.27E-05 |
| 315 | 2 | L4 vs. M4 | 248926_at       | AT5G45880 | SKU5 similar 11;(source:Araport11)                                                                                                                                                                                                                                                                                                                                                                                                                                                                                                                                                                                                                                                                                                                                                                  | 304.10  | 99.56  | 3.05 | 9.00E-07 | 1.29E-05 |
| 316 | 2 | L4 vs. M4 | 263113_at       | AT1G03150 | Pollen Ole e 1 allergen and extensin family protein;(source:Araport11)                                                                                                                                                                                                                                                                                                                                                                                                                                                                                                                                                                                                                                                                                                                              | 178.26  | 59.09  | 3.02 | 3.00E-07 | 6.20E-06 |
| 317 | 2 | L4 vs. M4 | 255997_s_a<br>t | AT1G29930 | Acyl-CoA N-acyltransferases (NAT) superfamily protein;(source:Araport11)                                                                                                                                                                                                                                                                                                                                                                                                                                                                                                                                                                                                                                                                                                                            | 2759.91 | 921.84 | 2.99 | 5.50E-06 | 3.52E-05 |
| 318 | 2 | L4 vs. M4 | 255515_at       | AT4G02250 | Subunit of light-harvesting complex II (LHCII),which absorbs light and transfers energy to the photosynthetic reaction center. The mRNA is cell-to-cell mobile.                                                                                                                                                                                                                                                                                                                                                                                                                                                                                                                                                                                                                                     | 107.07  | 35.83  | 2.99 | 3.00E-07 | 6.20E-06 |
| 319 | 2 | L4 vs. M4 | 254716_at       | AT4G13560 | Plant invertase/pectin methylesterase inhibitor superfamily protein;(source:Araport11)                                                                                                                                                                                                                                                                                                                                                                                                                                                                                                                                                                                                                                                                                                              | 209.52  | 70.37  | 2.98 | 5.50E-06 | 3.52E-05 |
| 320 | 2 | L4 vs. M4 | 253627_at       | AT4G30650 | Late embryogenesis abundant protein (LEA) family protein;(source:Araport11)                                                                                                                                                                                                                                                                                                                                                                                                                                                                                                                                                                                                                                                                                                                         | 222.44  | 74.75  | 2.98 | 1.88E-04 | 4.37E-04 |
| 321 | 2 | L4 vs. M4 | 253812_at       | AT4G28240 | Low temperature and salt responsive protein family;(source:Araport11)                                                                                                                                                                                                                                                                                                                                                                                                                                                                                                                                                                                                                                                                                                                               | 228.98  | 77.48  | 2.96 | 4.00E-07 | 7.54E-06 |
| 322 | 2 | L4 vs. M4 | 252267_at       | AT3G49640 | Member of the wound-induced polypeptide (WIP) family. Positively regulates plant resistance against Pst DC3000 by enhancing PTI responses.                                                                                                                                                                                                                                                                                                                                                                                                                                                                                                                                                                                                                                                          | 172.63  | 59.03  | 2.92 | 1.71E-05 | 6.90E-05 |
| 323 | 2 | L4 vs. M4 | 261395_at       | AT1G79700 | Aldolase-type TIM barrel family protein;(source:Araport11)                                                                                                                                                                                                                                                                                                                                                                                                                                                                                                                                                                                                                                                                                                                                          | 169.01  | 58.01  | 2.91 | 1.00E-06 | 1.34E-05 |
| 324 | 2 | L4 vs. M4 | 250610_at       | AT5G07550 | WRI4 encodes an AP2/ERF-type transcriptional activator that specifically controls cuticular wax biosynthesis in Arabidopsis stems. It also functions to activate transcription of genes involved fatty acid biosynthesis during seed and flower development as well as stem wax biosynthesis. Targets identified by ChIP-seq include: LACS1, KCR1, PAS2, ECR, and WSD1.                                                                                                                                                                                                                                                                                                                                                                                                                             | 1801.91 | 637.49 | 2.83 | 7.00E-07 | 1.12E-05 |
| 325 | 2 | L4 vs. M4 | 260042_at       | AT1G68820 | member of Oleosin-like protein family                                                                                                                                                                                                                                                                                                                                                                                                                                                                                                                                                                                                                                                                                                                                                               | 133.51  | 47.51  | 2.81 | 7.10E-06 | 4.03E-05 |
| 326 | 2 | L4 vs. M4 | 256772_at       | AT3G13750 | Putative C3HC4 zinc-finger ubiquitin E3 ligase, negative regulator in ABA and drought stress response.                                                                                                                                                                                                                                                                                                                                                                                                                                                                                                                                                                                                                                                                                              | 872.14  | 314.28 | 2.77 | 1.04E-05 | 4.96E-05 |
| 327 | 2 | L4 vs. M4 | 250514_at       | AT5G09550 | beta-galactosidase, glycosyl hydrolase family 35 The mRNA is cell-to-cell mobile.                                                                                                                                                                                                                                                                                                                                                                                                                                                                                                                                                                                                                                                                                                                   | 69.90   | 25.22  | 2.77 | 2.80E-06 | 2.34E-05 |
| 328 | 2 | L4 vs. M4 | 250073_at       | AT5G17170 | GDP dissociation inhibitor family protein / Rab GTPase activator family protein;(source:Araport11)                                                                                                                                                                                                                                                                                                                                                                                                                                                                                                                                                                                                                                                                                                  | 1226.89 | 442.98 | 2.77 | 4.00E-07 | 7.54E-06 |
| 329 | 2 | L4 vs. M4 | 251222_at       | AT3G62580 | rubredoxin family protein;(source:Araport11)                                                                                                                                                                                                                                                                                                                                                                                                                                                                                                                                                                                                                                                                                                                                                        | 120.75  | 43.98  | 2.75 | 3.50E-06 | 2.70E-05 |
| 330 | 2 | L4 vs. M4 | 255257_at       | AT4G05050 | Late embryogenesis abundant protein (LEA) family protein;(source:Araport11)                                                                                                                                                                                                                                                                                                                                                                                                                                                                                                                                                                                                                                                                                                                         | 140.89  | 51.64  | 2.73 | 1.42E-04 | 3.48E-04 |
| 331 | 2 | L4 vs. M4 | 252063_at       | AT3G51590 | polyubiquitin gene, belongs to a subtype group with UBQ10 and UBQ14. Various ecotypes of Arabidopsis have different numbers of ubiquitin repeats within this gene.                                                                                                                                                                                                                                                                                                                                                                                                                                                                                                                                                                                                                                  | 190.10  | 70.70  | 2.69 | 6.30E-06 | 3.82E-05 |
| 332 | 2 | L4 vs. M4 | 246545_at       | AT5G15110 | Encodes a member of the lipid transfer protein family. Proteins of this family are generally small (~9 kD), basic, expressed abundantly and contain eight Cys residues. The proteins can bind fatty acids and acylCoA esters and can transfer several different phospholipids. They are localized to the cell wall. The LTP12 promoter is active exclusively in the tapetum during the uninucleate microspore and bicellular pollen stages. Predicted to be a member of PR-14 pathogenesis-related protein family with the following members: At2g38540/LTP1, At2g38530/LTP2, At5g59320/LTP3, At5g59310/LTP4, At3g51600/LTP5, At3g08770/LTP6, At2g15050/LTP7, At2g18370/LTP8, At2g15325/LTP9, At5g01870/LTP10, At4g33355/LTP11, At3g51590/LTP12, At5g44265/LTP13, At5g62065/LTP14, At4g08530/LTP15. | 208.65  | 77.47  | 2.69 | 8.27E-05 | 2.23E-04 |
| 333 | 2 | L4 vs. M4 | 251258_at       | AT3G62170 | Pectate lyase family protein;(source:Araport11)                                                                                                                                                                                                                                                                                                                                                                                                                                                                                                                                                                                                                                                                                                                                                     | 472.01  | 177.07 | 2.67 | 1.38E-05 | 5.88E-05 |
|     |   |           |                 |           | VANGUARD-like protein;(source:Araport11)                                                                                                                                                                                                                                                                                                                                                                                                                                                                                                                                                                                                                                                                                                                                                            |         |        |      |          |          |

|     |   |           |            |           |                                                                                                                                                                                                                                                                                                                                                                                                                                                                                                                                                                                                                                                                                                                                                                                                                                                                                                                                                        |        |        |      |          |          |
|-----|---|-----------|------------|-----------|--------------------------------------------------------------------------------------------------------------------------------------------------------------------------------------------------------------------------------------------------------------------------------------------------------------------------------------------------------------------------------------------------------------------------------------------------------------------------------------------------------------------------------------------------------------------------------------------------------------------------------------------------------------------------------------------------------------------------------------------------------------------------------------------------------------------------------------------------------------------------------------------------------------------------------------------------------|--------|--------|------|----------|----------|
| 334 | 2 | L4 vs. M4 | 264140_at  | AT1G79210 | N-terminal nucleophile aminohydrolases (Ntn hydrolases) superfamily protein;(source:Araport11)                                                                                                                                                                                                                                                                                                                                                                                                                                                                                                                                                                                                                                                                                                                                                                                                                                                         | 632.72 | 237.80 | 2.66 | 5.70E-06 | 3.60E-05 |
| 335 | 2 | L4 vs. M4 | 266154_at  | AT2G12190 | Cytochrome P450 superfamily protein;(source:Araport11)                                                                                                                                                                                                                                                                                                                                                                                                                                                                                                                                                                                                                                                                                                                                                                                                                                                                                                 | 155.16 | 58.30  | 2.66 | 1.13E-05 | 5.19E-05 |
| 336 | 2 | L4 vs. M4 | 263156_at  | AT1G54030 | Encodes a vacuolar protein. Mutation causes organizational defects in the endoplasmic reticulum and aberrant protein trafficking in the plant secretory pathway.The mRNA is cell-to-cell mobile.                                                                                                                                                                                                                                                                                                                                                                                                                                                                                                                                                                                                                                                                                                                                                       | 139.48 | 52.79  | 2.64 | 2.60E-06 | 2.25E-05 |
| 337 | 2 | L4 vs. M4 | 254085_at  | AT4G24960 | Homologous to a eukaryote specific ABA- and stress-inducible gene first isolated from barley. Groups in one subfamily with ATHVA22E. Along with other members of the ATHVA22 family, it may be involved in regulation of autophagy during development. The mRNA is cell-to-cell mobile.                                                                                                                                                                                                                                                                                                                                                                                                                                                                                                                                                                                                                                                                | 402.29 | 152.46 | 2.64 | 6.00E-07 | 9.91E-06 |
| 338 | 2 | L4 vs. M4 | 265387_at  | AT2G20670 | sugar phosphate exchanger, putative (DUF506);(source:Araport11)                                                                                                                                                                                                                                                                                                                                                                                                                                                                                                                                                                                                                                                                                                                                                                                                                                                                                        | 103.22 | 39.25  | 2.63 | 1.21E-05 | 5.44E-05 |
| 339 | 2 | L4 vs. M4 | 256416_at  | AT3G11050 | ferritin 2;(source:Araport11)                                                                                                                                                                                                                                                                                                                                                                                                                                                                                                                                                                                                                                                                                                                                                                                                                                                                                                                          | 150.98 | 57.42  | 2.63 | 8.90E-06 | 4.49E-05 |
| 340 | 2 | L4 vs. M4 | 253061_at  | AT4G37610 | BTB and TAZ domain protein. Located in cytoplasm and expressed in fruit, flower and leaves.                                                                                                                                                                                                                                                                                                                                                                                                                                                                                                                                                                                                                                                                                                                                                                                                                                                            | 108.58 | 41.28  | 2.63 | 7.00E-07 | 1.12E-05 |
| 341 | 2 | L4 vs. M4 | 262707_at  | AT1G16290 | transglycosylase;(source:Araport11)                                                                                                                                                                                                                                                                                                                                                                                                                                                                                                                                                                                                                                                                                                                                                                                                                                                                                                                    | 112.41 | 43.14  | 2.61 | 1.00E-06 | 1.34E-05 |
| 342 | 2 | L4 vs. M4 | 261096_at  | AT1G62940 | encodes an acyl-CoA synthetase, has in vitro activity towards medium- to long-chain fatty acids and their hydroxylated derivatives. Expressed in the tapetum. Involved in pollen wall exine formation. Null mutants were devoid of pollen grains at anther maturity and were completely male sterile.                                                                                                                                                                                                                                                                                                                                                                                                                                                                                                                                                                                                                                                  | 131.74 | 51.15  | 2.58 | 6.80E-06 | 3.98E-05 |
| 343 | 2 | L4 vs. M4 | 251037_at  | AT5G02100 | Encodes a protein that binds to beta-sitosterol and localizes to the ER. The WFDE motif in ORP3a appears to be important for a direct interaction with PVA12 [Plant VAMP-Associated protein 12]. Mutation of this motif causes ORP3a to relocalize to the Golgi and cytosol. The interaction between PVA12 and ORP3a does not appear to be sterol-dependent.                                                                                                                                                                                                                                                                                                                                                                                                                                                                                                                                                                                           | 295.11 | 114.47 | 2.58 | 1.60E-06 | 1.74E-05 |
| 344 | 2 | L4 vs. M4 | 250545_at  | AT5G08160 | Encodes a serine/threonine protein kinase.                                                                                                                                                                                                                                                                                                                                                                                                                                                                                                                                                                                                                                                                                                                                                                                                                                                                                                             | 443.47 | 172.03 | 2.58 | 1.36E-05 | 5.88E-05 |
| 345 | 2 | L4 vs. M4 | 248638_at  | AT5G49070 | Encodes KCS21, a member of the 3-ketoacyl-CoA synthase family involved in the biosynthesis of VLCFA (very long chain fatty acids).                                                                                                                                                                                                                                                                                                                                                                                                                                                                                                                                                                                                                                                                                                                                                                                                                     | 120.49 | 46.82  | 2.57 | 1.20E-06 | 1.50E-05 |
| 346 | 2 | L4 vs. M4 | 263548_at  | AT2G21660 | Encodes a small glycine-rich RNA binding protein that is part of a negative-feedback loop through which AtGRP7 regulates the circadian oscillations of its own transcript. Gene expression is induced by cold. GRP7 appears to promote stomatal opening and reduce tolerance under salt and dehydration stress conditions, but, promotes stomatal closing and thereby increases stress tolerance under conditions of cold tolerance. Loss of function mutations have increased susceptibility to pathogens suggesting a role in mediating innate immune response. Mutants are also late flowering in a non-photoperiodic manner and are responsive to vernalization suggesting an interaction with the autonomous flowering pathway. There is a reduction of mRNA export from the nucleus in grp7 mutants. GRP7:GFP fusion proteins can be found in the cytosol and nucleus. A substrate of the type III effector HopU1 (mono-ADP-ribosyltransferase). | 293.91 | 114.60 | 2.56 | 8.20E-06 | 4.21E-05 |
| 347 | 2 | L4 vs. M4 | 266592_at  | AT2G46210 | Fatty acid/sphingolipid desaturase;(source:Araport11)                                                                                                                                                                                                                                                                                                                                                                                                                                                                                                                                                                                                                                                                                                                                                                                                                                                                                                  | 91.96  | 36.09  | 2.55 | 9.10E-06 | 4.52E-05 |
| 348 | 2 | L4 vs. M4 | 264993_at  | AT1G67290 | glyoxal oxidase-related protein;(source:Araport11)                                                                                                                                                                                                                                                                                                                                                                                                                                                                                                                                                                                                                                                                                                                                                                                                                                                                                                     | 261.67 | 103.11 | 2.54 | 1.69E-05 | 6.90E-05 |
| 349 | 2 | L4 vs. M4 | 248001_at  | AT5G55990 | Encodes a member of the Arabidopsis CBL (Calcineurin B-like Calcium Sensor) protein family.                                                                                                                                                                                                                                                                                                                                                                                                                                                                                                                                                                                                                                                                                                                                                                                                                                                            | 179.62 | 70.62  | 2.54 | 5.70E-06 | 3.60E-05 |
| 350 | 2 | L4 vs. M4 | 252140_at  | AT3G51070 | S-adenosyl-L-methionine-dependent methyltransferases superfamily protein;(source:Araport11)                                                                                                                                                                                                                                                                                                                                                                                                                                                                                                                                                                                                                                                                                                                                                                                                                                                            | 63.40  | 25.11  | 2.53 | 5.00E-06 | 3.46E-05 |
| 351 | 2 | L4 vs. M4 | 258645_s_a | AT3G07850 | Pectin lyase-like superfamily protein;(source:Araport11)<br>Encodes FERRITIN 3, AtFER3. Ferritins are a class of 24-mer multi-meric proteins found in all kingdoms of life. Function as the main iron store in mammals. Evidence suggests that Arabidopsis ferritins are essential to protect cells against oxidative damage, but they do not constitute the major iron pool.                                                                                                                                                                                                                                                                                                                                                                                                                                                                                                                                                                          | 97.02  | 38.54  | 2.52 | 1.55E-05 | 6.43E-05 |
| 352 | 2 | L4 vs. M4 | 251735_at  | AT3G56090 | SKU5 similar 12;(source:Araport11)                                                                                                                                                                                                                                                                                                                                                                                                                                                                                                                                                                                                                                                                                                                                                                                                                                                                                                                     | 423.87 | 168.53 | 2.52 | 1.50E-06 | 1.71E-05 |
| 353 | 2 | L4 vs. M4 | 265080_at  | AT1G55570 | putative beta-galactosidase (BGAL11 gene)                                                                                                                                                                                                                                                                                                                                                                                                                                                                                                                                                                                                                                                                                                                                                                                                                                                                                                              | 56.03  | 22.51  | 2.49 | 1.40E-06 | 1.63E-05 |
| 354 | 2 | L4 vs. M4 | 253226_at  | AT4G35010 | Peroxidase superfamily protein;(source:Araport11)                                                                                                                                                                                                                                                                                                                                                                                                                                                                                                                                                                                                                                                                                                                                                                                                                                                                                                      | 70.67  | 28.39  | 2.49 | 1.90E-06 | 1.94E-05 |
| 355 | 2 | L4 vs. M4 | 261518_at  | AT1G71695 | RhoGTPase GDP dissociation inhibitor (RhoGDI) that spatially restricts the sites of growth to a single point on the trichoblast. It regulates the NADPH oxidase RHD2/AtrbohC, which is required for hair growth.                                                                                                                                                                                                                                                                                                                                                                                                                                                                                                                                                                                                                                                                                                                                       | 97.58  | 39.40  | 2.48 | 8.00E-06 | 4.15E-05 |
| 356 | 2 | L4 vs. M4 | 258637_at  | AT3G07880 |                                                                                                                                                                                                                                                                                                                                                                                                                                                                                                                                                                                                                                                                                                                                                                                                                                                                                                                                                        | 734.80 | 296.40 | 2.48 | 3.10E-06 | 2.47E-05 |

|     |   |           |            |           |                                                                                                                                                                                                                                                                                                                                                                                                                                                                                                                                                                                                    |         |        |      |          |          |
|-----|---|-----------|------------|-----------|----------------------------------------------------------------------------------------------------------------------------------------------------------------------------------------------------------------------------------------------------------------------------------------------------------------------------------------------------------------------------------------------------------------------------------------------------------------------------------------------------------------------------------------------------------------------------------------------------|---------|--------|------|----------|----------|
| 357 | 2 | L4 vs. M4 | 260201_at  | AT1G67600 | Acid phosphatase/vanadium-dependent haloperoxidase-related protein;(source:Araport11)                                                                                                                                                                                                                                                                                                                                                                                                                                                                                                              | 215.08  | 87.53  | 2.46 | 9.00E-07 | 1.29E-05 |
| 358 | 2 | L4 vs. M4 | 252430_at  | AT3G47470 | Encodes a chlorophyll a/b-binding protein that is more similar to the PSI Cab proteins than the PSII cab proteins. The predicted protein is about 20 amino acids shorter than most known Cab proteins. Bifunctional inhibitor/lipid-transfer protein/seed storage 2S albumin superfamily protein;(source:Araport11)                                                                                                                                                                                                                                                                                | 1376.47 | 562.83 | 2.45 | 4.80E-06 | 3.41E-05 |
| 359 | 2 | L4 vs. M4 | 266123_at  | AT2G45180 | ubiquitin-conjugating enzyme 22;(source:Araport11)                                                                                                                                                                                                                                                                                                                                                                                                                                                                                                                                                 | 130.59  | 53.48  | 2.44 | 1.40E-06 | 1.63E-05 |
| 360 | 2 | L4 vs. M4 | 250814_at  | AT5G05080 | Member of a diversely expressed predicted peptide family showing sequence similarity to tobacco Rapid Alkalinization Factor (RALF), and is believed to play an essential role in the physiology of Arabidopsis. Consists of a single exon and is characterized by a conserved C-terminal motif and N-terminal signal peptide. RALF4 and RALF19 act redundantly in the pollen tube to regulate pollen tube growth.                                                                                                                                                                                  | 582.78  | 239.18 | 2.44 | 5.30E-06 | 3.52E-05 |
| 361 | 2 | L4 vs. M4 | 245658_at  | AT1G28270 | Encodes a chloroplast thylakoid localized RbcX protein that acts as a chaperone in the folding of Rubisco.                                                                                                                                                                                                                                                                                                                                                                                                                                                                                         | 87.30   | 35.97  | 2.43 | 1.75E-04 | 4.16E-04 |
| 362 | 2 | L4 vs. M4 | 255331_at  | AT4G04330 | Encodes a thionin which is a cysteine rich protein having antimicrobial properties. Thi2.1 is expressed in response to a variety of pathogens and induced by ethylene and jasmonic acid. Belongs to the plant thionin (PR-13) family with the following members: At1g66100, At5g36910, At1g72260, At2g15010, At1g12663, At1g12660.                                                                                                                                                                                                                                                                 | 161.72  | 67.19  | 2.41 | 7.60E-06 | 4.10E-05 |
| 363 | 2 | L4 vs. M4 | 259802_at  | AT1G72260 | transmembrane protein;(source:Araport11)                                                                                                                                                                                                                                                                                                                                                                                                                                                                                                                                                           | 36.95   | 15.42  | 2.40 | 3.80E-06 | 2.87E-05 |
| 364 | 2 | L4 vs. M4 | 252161_at  | AT3G50580 | alpha carbonic anhydrase 3;(source:Araport11)                                                                                                                                                                                                                                                                                                                                                                                                                                                                                                                                                      | 97.76   | 40.75  | 2.40 | 6.10E-06 | 3.74E-05 |
| 365 | 2 | L4 vs. M4 | 245700_at  | AT5G04180 | Is essential for chloroplast NAD(P)H dehydrogenase activity, which is involved in electron transfer between PSII and PSI. Likely functions in biogenesis or stabilization of the NAD(P)H dehydrogenase complex. The mRNA is cell-to-cell mobile.                                                                                                                                                                                                                                                                                                                                                   | 58.92   | 24.57  | 2.40 | 1.40E-06 | 1.63E-05 |
| 366 | 2 | L4 vs. M4 | 248402_at  | AT5G52100 | hypothetical protein;(source:Araport11)                                                                                                                                                                                                                                                                                                                                                                                                                                                                                                                                                            | 95.81   | 39.94  | 2.40 | 3.80E-06 | 2.87E-05 |
| 367 | 2 | L4 vs. M4 | 267443_at  | AT2G19000 | CAP (Cysteine-rich secretory proteins, Antigen 5, and Pathogenesis-related 1 protein) superfamily protein;(source:Araport11)                                                                                                                                                                                                                                                                                                                                                                                                                                                                       | 54.63   | 22.84  | 2.39 | 2.70E-04 | 5.75E-04 |
| 368 | 2 | L4 vs. M4 | 254024_at  | AT4G25780 | Zinc finger C-x8-C-x5-C-x3-H type family protein;(source:Araport11)                                                                                                                                                                                                                                                                                                                                                                                                                                                                                                                                | 157.00  | 65.56  | 2.39 | 1.73E-05 | 6.96E-05 |
| 369 | 2 | L4 vs. M4 | 260430_at  | AT1G68200 | Profilin is a low-molecular weight, actin monomer-binding protein that regulates the organization of actin cytoskeleton in eukaryotes, including higher plants. PRF4 and PRF5 are late pollen-specific and are not detectable in other cell types of the plant body including microspores and root hairs. Immunocytochemical studies at the subcellular level reveal that both the constitutive and pollen-specific profilins are abundant in the cytoplasm. In vegetative cell types, such as root apical cells, profilins showed localization to nuclei in addition to the cytoplasmic staining. | 143.61  | 60.35  | 2.38 | 1.50E-06 | 1.71E-05 |
| 370 | 2 | L4 vs. M4 | 253725_at  | AT4G29340 | Encodes an F-box protein involved in the ubiquitin/proteasome-dependent proteolysis of EIN3. The mRNA is cell-to-cell mobile.                                                                                                                                                                                                                                                                                                                                                                                                                                                                      | 118.78  | 49.81  | 2.38 | 2.30E-06 | 2.09E-05 |
| 371 | 2 | L4 vs. M4 | 265633_at  | AT2G25490 | Encodes a member of the SWEET sucrose efflux transporter family proteins.                                                                                                                                                                                                                                                                                                                                                                                                                                                                                                                          | 182.90  | 77.31  | 2.37 | 4.90E-06 | 3.46E-05 |
| 372 | 2 | L4 vs. M4 | 249800_at  | AT5G23660 | light harvesting complex photosystem II;(source:Araport11)                                                                                                                                                                                                                                                                                                                                                                                                                                                                                                                                         | 217.93  | 91.87  | 2.37 | 2.75E-05 | 9.91E-05 |
| 373 | 2 | L4 vs. M4 | 251082_at  | AT5G01530 | PLANT CADMIUM RESISTANCE 1;(source:Araport11)                                                                                                                                                                                                                                                                                                                                                                                                                                                                                                                                                      | 2064.28 | 877.08 | 2.35 | 1.09E-04 | 2.82E-04 |
| 374 | 2 | L4 vs. M4 | 262832_s_a | AT1G14880 | NAC transcription regulator. Regulates endosperm cell expansion during germination.                                                                                                                                                                                                                                                                                                                                                                                                                                                                                                                | 126.83  | 54.10  | 2.34 | 6.50E-06 | 3.88E-05 |
| 375 | 2 | L4 vs. M4 | 264882_at  | AT1G61110 | mutant is Albino and pale green; Chloroplast Protein Translocation (tatC). Core subunit of the chloroplast Tat translocase. Integral chloroplast thylakoid membrane protein.                                                                                                                                                                                                                                                                                                                                                                                                                       | 397.95  | 170.02 | 2.34 | 2.00E-06 | 1.99E-05 |
| 376 | 2 | L4 vs. M4 | 262202_at  | AT2G01110 | Encodes HDA9 (a RPD3-like histone deacetylase). Functions in promoting the onset of leaf senescence. The hda9 mutant shows enhanced H3K9 acetylation levels, based on immunodetection using H3K9ac antibodies.                                                                                                                                                                                                                                                                                                                                                                                     | 231.55  | 99.56  | 2.33 | 2.50E-06 | 2.20E-05 |
| 377 | 2 | L4 vs. M4 | 252649_at  | AT3G44680 | A nuclear encoded soluble protein found in the chloroplast stroma. Negatively regulated by light and has rapid turnover in darkness.                                                                                                                                                                                                                                                                                                                                                                                                                                                               | 140.97  | 60.48  | 2.33 | 1.60E-06 | 1.74E-05 |
| 378 | 2 | L4 vs. M4 | 261901_at  | AT1G80920 | Encodes DRL1 (Dihydroflavonol 4-reductase-like1), a closely related homolog of the rice anther-specific gene OsDFR2. DRL1 may be involved in a metabolic pathway essential for pollen wall development and male fertility. Mutant plants have impaired pollen formation and seed production.                                                                                                                                                                                                                                                                                                       | 868.14  | 373.84 | 2.32 | 2.05E-05 | 7.89E-05 |
| 379 | 2 | L4 vs. M4 | 253195_at  | AT4G35420 |                                                                                                                                                                                                                                                                                                                                                                                                                                                                                                                                                                                                    | 40.03   | 17.25  | 2.32 | 1.92E-05 | 7.53E-05 |

|     |   |           |             |           |                                                                                                                                                                                                                                                                                                                                                                                                                                                                                                                                                                                                                           |         |        |      |          |          |
|-----|---|-----------|-------------|-----------|---------------------------------------------------------------------------------------------------------------------------------------------------------------------------------------------------------------------------------------------------------------------------------------------------------------------------------------------------------------------------------------------------------------------------------------------------------------------------------------------------------------------------------------------------------------------------------------------------------------------------|---------|--------|------|----------|----------|
| 380 | 2 | L4 vs. M4 | 261412_at   | AT1G07890 | Encodes a cytosolic ascorbate peroxidase APX1. Ascorbate peroxidases are enzymes that scavenge hydrogen peroxide in plant cells. Eight types of APX have been described for Arabidopsis: three cytosolic (APX1, APX2, APX6), two chloroplastic types (stromal sAPX, thylakoid tAPX), and three microsomal (APX3, APX4, APX5) isoforms. At least part of the induction of heat shock proteins during light stress in Arabidopsis is mediated by H2O2 that is scavenged by APX1. Expression of the gene is downregulated in the presence of paraquat, an inducer of photooxidative stress. The mRNA is cell-to-cell mobile. | 287.07  | 124.18 | 2.31 | 5.65E-04 | 1.05E-03 |
| 381 | 2 | L4 vs. M4 | 256398_at   | AT3G06100 | Encodes NIP7;1, an anther-specific borate transporter of the aquaporin superfamily regulated by an unusual tyrosine in helix 2 of the transport pore.                                                                                                                                                                                                                                                                                                                                                                                                                                                                     | 512.04  | 222.41 | 2.30 | 3.16E-05 | 1.07E-04 |
| 382 | 2 | L4 vs. M4 | 251013_at   | AT5G02540 | NAD(P)-binding Rossmann-fold superfamily protein;(source:Araport11)                                                                                                                                                                                                                                                                                                                                                                                                                                                                                                                                                       | 126.54  | 54.96  | 2.30 | 9.20E-06 | 4.53E-05 |
| 383 | 2 | L4 vs. M4 | 265111_at   | AT1G62510 | Expressed in the root cortex. Bifunctional inhibitor/lipid-transfer protein/seed storage 2S albumin superfamily protein;(source:Araport11)                                                                                                                                                                                                                                                                                                                                                                                                                                                                                | 61.50   | 27.01  | 2.28 | 9.10E-06 | 4.52E-05 |
| 384 | 2 | L4 vs. M4 | 256381_at   | AT1G66850 | Pectin lyase-like superfamily protein;(source:Araport11)                                                                                                                                                                                                                                                                                                                                                                                                                                                                                                                                                                  | 129.33  | 56.62  | 2.28 | 5.50E-06 | 3.52E-05 |
| 385 | 2 | L4 vs. M4 | 248714_at   | AT5G48140 | Encodes a calcium binding protein whose mRNA is induced upon treatment with NaCl, ABA and in response to desiccation. mRNA expression under drought conditions is apparent particularly in leaves and flowers. Isoform of caleosin with a role as a peroxxygenase involved in oxylipin metabolism during biotic and abiotic stress. Involved in the production of 2-hydroxy-octadecatrienoic acid. The peroxxygenase has a narrow substrate specificity thus acting as a fatty acid hydroperoxide reductase in vivo.                                                                                                      | 714.94  | 314.17 | 2.28 | 2.20E-06 | 2.09E-05 |
| 386 | 2 | L4 vs. M4 | 255795_at   | AT2G33380 | protein synthesis initiation factor eIF2 gamma The mRNA is cell-to-cell mobile.                                                                                                                                                                                                                                                                                                                                                                                                                                                                                                                                           | 150.65  | 66.41  | 2.27 | 7.78E-05 | 2.14E-04 |
| 387 | 2 | L4 vs. M4 | 264327_at   | AT1G04170 | ORMDL family protein;(source:Araport11)                                                                                                                                                                                                                                                                                                                                                                                                                                                                                                                                                                                   | 177.97  | 78.92  | 2.26 | 2.50E-06 | 2.20E-05 |
| 388 | 2 | L4 vs. M4 | 249251_at   | AT5G42000 | encodes sirohydrochlorin ferrochelatase catalyzing the last step of the siroheme biosynthesis Non-catalytic subunit specific to DNA-directed RNA polymerase II; the ortholog of budding yeast RPB7                                                                                                                                                                                                                                                                                                                                                                                                                        | 83.87   | 37.34  | 2.25 | 2.94E-05 | 1.02E-04 |
| 389 | 2 | L4 vs. M4 | 262417_at   | AT1G50170 | Proline-rich protein expressed in expanding leaves, stems, flowers, and siliques.                                                                                                                                                                                                                                                                                                                                                                                                                                                                                                                                         | 235.34  | 104.99 | 2.24 | 7.80E-06 | 4.12E-05 |
| 390 | 2 | L4 vs. M4 | 247763_at   | AT5G59180 |                                                                                                                                                                                                                                                                                                                                                                                                                                                                                                                                                                                                                           | 145.47  | 64.94  | 2.24 | 9.80E-06 | 4.78E-05 |
| 391 | 2 | L4 vs. M4 | 264007_at   | AT2G21140 | Encodes a large protein with N-terminal bromo-adjacent homology (BAH) and transcription elongation factor S-II (TFS2N) domains and two C-terminal GW (glycine and tryptophan) repeats. It is nuclear and colocalizes with the processing-body component DCP1 in the cytoplasm. SOU is a component of the miRNA pathway and is involved in translational repression.                                                                                                                                                                                                                                                       | 485.71  | 217.57 | 2.23 | 4.00E-06 | 2.98E-05 |
| 392 | 2 | L4 vs. M4 | 252402_s_at | AT3G48050 | Encodes a putative beta-carbonic anhydrase betaCA1. Together with betaCA4 (At1g70410) regulates CO2-controlled stomatal movements in guard cells, as well as attenuates immunity. Differential CA gene expression in response to changing atmospheric CO2 conditions contribute to altered disease resistance levels. Activated by OXS2 under the treatment of salt.                                                                                                                                                                                                                                                      | 419.46  | 188.17 | 2.23 | 2.80E-06 | 2.34E-05 |
| 393 | 2 | L4 vs. M4 | 259161_at   | AT3G01500 | beta-galactosidase 2;(source:Araport11)                                                                                                                                                                                                                                                                                                                                                                                                                                                                                                                                                                                   | 584.64  | 263.91 | 2.22 | 4.50E-06 | 3.27E-05 |
| 394 | 2 | L4 vs. M4 | 251996_at   | AT3G52840 | UDP-N-acetylglucosamine transferase subunit ALG14-like protein;(source:Araport11)                                                                                                                                                                                                                                                                                                                                                                                                                                                                                                                                         | 303.60  | 137.05 | 2.22 | 1.20E-04 | 3.06E-04 |
| 395 | 2 | L4 vs. M4 | 254658_at   | AT4G18230 | regulatory particle non-ATPase 12A;(source:Araport11)                                                                                                                                                                                                                                                                                                                                                                                                                                                                                                                                                                     | 82.89   | 37.42  | 2.21 | 1.21E-04 | 3.07E-04 |
| 396 | 2 | L4 vs. M4 | 261955_at   | AT1G64520 | Chaperone DnaJ-domain superfamily protein;(source:Araport11)                                                                                                                                                                                                                                                                                                                                                                                                                                                                                                                                                              | 249.41  | 113.55 | 2.20 | 1.89E-04 | 4.37E-04 |
| 397 | 2 | L4 vs. M4 | 250079_at   | AT5G16650 | encodes a member of glycosyl hydrolase family 36. Expression is induced within 3 hours of dark treatment, in senescing leaves and treatment with exogenous photosynthesis inhibitor. Induction of gene expression was suppressed in excised leaves supplied with sugar. The authors suggest that the gene's expression pattern is responding to the level of sugar in the cell. The mRNA is cell-to-cell mobile.                                                                                                                                                                                                          | 872.72  | 398.31 | 2.19 | 6.30E-06 | 3.82E-05 |
| 398 | 2 | L4 vs. M4 | 246114_at   | AT5G20250 | Myo-Inositol Oxygenase gene family                                                                                                                                                                                                                                                                                                                                                                                                                                                                                                                                                                                        | 533.17  | 243.73 | 2.19 | 3.31E-05 | 1.11E-04 |
| 399 | 2 | L4 vs. M4 | 247981_at   | AT5G56640 | Encodes the PsbQ subunit of the oxygen evolving complex of photosystem II.                                                                                                                                                                                                                                                                                                                                                                                                                                                                                                                                                | 110.88  | 50.54  | 2.19 | 3.50E-06 | 2.70E-05 |
| 400 | 2 | L4 vs. M4 | 255248_at   | AT4G05180 |                                                                                                                                                                                                                                                                                                                                                                                                                                                                                                                                                                                                                           | 227.40  | 104.48 | 2.18 | 2.41E-05 | 8.99E-05 |
| 401 | 2 | L4 vs. M4 | 267002_s_at | AT2G34430 | Photosystem II type I chlorophyll a/b-binding protein The mRNA is cell-to-cell mobile.                                                                                                                                                                                                                                                                                                                                                                                                                                                                                                                                    | 1508.44 | 695.13 | 2.17 | 1.05E-04 | 2.75E-04 |
| 402 | 2 | L4 vs. M4 | 245330_at   | AT4G14930 | Survival protein SurE-like phosphatase/nucleotidase;(source:Araport11)                                                                                                                                                                                                                                                                                                                                                                                                                                                                                                                                                    | 102.15  | 47.15  | 2.17 | 8.74E-04 | 1.52E-03 |
| 403 | 2 | L4 vs. M4 | 253329_at   | AT4G33480 | BTB/POZ domain protein TNFAIP protein;(source:Araport11)                                                                                                                                                                                                                                                                                                                                                                                                                                                                                                                                                                  | 110.65  | 51.08  | 2.17 | 1.48E-04 | 3.59E-04 |
| 404 | 2 | L4 vs. M4 | 248245_at   | AT5G53190 | Nodulin MtN3 family protein;(source:Araport11)                                                                                                                                                                                                                                                                                                                                                                                                                                                                                                                                                                            | 180.37  | 83.21  | 2.17 | 4.93E-05 | 1.52E-04 |
| 405 | 2 | L4 vs. M4 | 262341_at   | AT1G64230 | ubiquitin-conjugating enzyme 28;(source:Araport11)                                                                                                                                                                                                                                                                                                                                                                                                                                                                                                                                                                        | 989.01  | 457.70 | 2.16 | 1.04E-04 | 2.75E-04 |

|     |   |           |            |           |                                                                                                                                                                                                                                                                                                                                                                                                                                   |         |         |      |          |          |
|-----|---|-----------|------------|-----------|-----------------------------------------------------------------------------------------------------------------------------------------------------------------------------------------------------------------------------------------------------------------------------------------------------------------------------------------------------------------------------------------------------------------------------------|---------|---------|------|----------|----------|
| 406 | 2 | L4 vs. M4 | 258402_at  | AT3G15450 | aluminum induced protein with YGL and LRDR motifs;(source:Araport11)                                                                                                                                                                                                                                                                                                                                                              | 96.72   | 44.76   | 2.16 | 4.84E-05 | 1.50E-04 |
| 407 | 2 | L4 vs. M4 | 254267_at  | AT4G22930 | Encodes dihydroorotase (PYR4).<br>Encodes a unique electron-transfer flavoprotein:ubiquinone oxidoreductase that is localized to the mitochondrion. Mutants are more sensitive to sugar starvation when plants are kept in the dark for long periods.                                                                                                                                                                             | 257.28  | 119.39  | 2.16 | 9.74E-04 | 1.66E-03 |
| 408 | 2 | L4 vs. M4 | 260536_at  | AT2G43400 | long periods.                                                                                                                                                                                                                                                                                                                                                                                                                     | 141.95  | 66.44   | 2.14 | 1.03E-05 | 4.96E-05 |
| 409 | 2 | L4 vs. M4 | 253042_at  | AT4G37550 | Acetamidase/Formamidase family protein;(source:Araport11)                                                                                                                                                                                                                                                                                                                                                                         | 190.31  | 88.78   | 2.14 | 1.52E-05 | 6.33E-05 |
| 410 | 2 | L4 vs. M4 | 247374_at  | AT5G63190 | Encodes a member of the MRF (MA3 DOMAIN-CONTAINING TRANSLATION REGULATORY FACTOR) gene family under TOR control that is transcriptionally induced by dark and starvation.                                                                                                                                                                                                                                                         | 424.66  | 198.61  | 2.14 | 7.40E-06 | 4.10E-05 |
| 411 | 2 | L4 vs. M4 | 256966_at  | AT3G13400 | MRF1 can be phosphorylated in vitro by S6K1 and S6K2.<br>SKU5 similar 13;(source:Araport11)                                                                                                                                                                                                                                                                                                                                       | 778.68  | 364.78  | 2.13 | 1.71E-05 | 6.90E-05 |
| 412 | 2 | L4 vs. M4 | 264439_at  | AT1G27450 | Adenosine phosphoribosyl transferase(E.C:2.4.2.7), involved in the one-step salvage of adenine to AMP.                                                                                                                                                                                                                                                                                                                            | 1149.30 | 542.51  | 2.12 | 4.49E-05 | 1.41E-04 |
| 413 | 2 | L4 vs. M4 | 264931_at  | AT1G60590 | Pectin lyase-like superfamily protein;(source:Araport11)                                                                                                                                                                                                                                                                                                                                                                          | 143.99  | 67.78   | 2.12 | 1.07E-05 | 5.00E-05 |
| 414 | 2 | L4 vs. M4 | 263064_at  | AT2G18160 | Encodes a b-ZIP transcription factor.                                                                                                                                                                                                                                                                                                                                                                                             | 258.10  | 121.96  | 2.12 | 1.97E-04 | 4.53E-04 |
| 415 | 2 | L4 vs. M4 | 266764_at  | AT2G47050 | Plant invertase/pectin methylesterase inhibitor superfamily protein;(source:Araport11)<br>Origin Recognition Complex subunit 1b. Involved in the initiation of DNA replication. Regulated transcriptionally during cell cycle, peaking at G1/S-phase. Target of E2F/DF family of transcription factors. Interacts with ORC2 and ORC5. Highly expressed in proliferating cells. Expression levels are independent of light regime. | 44.54   | 21.03   | 2.12 | 1.98E-04 | 4.54E-04 |
| 416 | 2 | L4 vs. M4 | 254824_s_a | AT4G12620 | Ribosomal protein S4;(source:Araport11)                                                                                                                                                                                                                                                                                                                                                                                           | 762.46  | 360.48  | 2.12 | 1.83E-05 | 7.25E-05 |
| 417 | 2 | L4 vs. M4 | 250159_at  | AT5G15200 | encodes a chloroplast pyruvate kinase alpha subunit. Important for seed oil biosynthesis. Ubiquitously expressed, with significantly increased expression in maturing seeds. The mRNA is cell-to-cell mobile.                                                                                                                                                                                                                     | 1078.00 | 508.90  | 2.12 | 3.74E-05 | 1.23E-04 |
| 418 | 2 | L4 vs. M4 | 256836_at  | AT3G22960 | transglutaminase family protein;(source:Araport11)                                                                                                                                                                                                                                                                                                                                                                                | 245.00  | 116.13  | 2.11 | 9.20E-06 | 4.53E-05 |
| 419 | 2 | L4 vs. M4 | 254561_at  | AT4G19160 | Encodes an ortholog of yeast NTF2, a nuclear envelop transport protein that functions as the nuclear import receptor for RanGDP, an essential player in nucleocytoplasmic transport. The mRNA is cell-to-cell mobile.                                                                                                                                                                                                             | 1711.76 | 810.20  | 2.11 | 5.50E-06 | 3.52E-05 |
| 420 | 2 | L4 vs. M4 | 259593_at  | AT1G27970 | Encodes a GDP-mannose pyrophosphorylase/ mannose-1-pyrophosphatase. This enzyme provides GDP-mannose, which is used for cell wall carbohydrate biosynthesis and protein glycosylation as well as for ascorbate (vitamin C) biosynthesis. Mutations in this gene confer hypersensitivity to NH4+.                                                                                                                                  | 112.54  | 53.48   | 2.10 | 6.96E-05 | 2.00E-04 |
| 421 | 2 | L4 vs. M4 | 245060_at  | AT2G39770 | Encodes a nuclear matrix protein with AT-hook DNA binding motifs that acts in the maintenance of genomic integrity by silencing TEs and repeat-containing genes through epigenetic machinery. It interacts with FVE and MSI5 which are components of HDAC corepressor complexes. It is expressed in tapetum during the tetrad stage.                                                                                              | 494.65  | 235.13  | 2.10 | 5.10E-06 | 3.51E-05 |
| 422 | 2 | L4 vs. M4 | 265263_at  | AT2G42940 | Ribosomal protein S11 family protein;(source:Araport11)                                                                                                                                                                                                                                                                                                                                                                           | 60.45   | 28.76   | 2.10 | 2.71E-04 | 5.75E-04 |
| 423 | 2 | L4 vs. M4 | 252055_at  | AT3G52580 | Thioredoxin family protein;(source:Araport11)                                                                                                                                                                                                                                                                                                                                                                                     | 615.36  | 293.26  | 2.10 | 1.78E-05 | 7.11E-05 |
| 424 | 2 | L4 vs. M4 | 255013_at  | AT4G10000 | Phosphorylase superfamily protein;(source:Araport11)                                                                                                                                                                                                                                                                                                                                                                              | 142.23  | 67.57   | 2.10 | 9.89E-05 | 2.62E-04 |
| 425 | 2 | L4 vs. M4 | 253743_at  | AT4G28940 | Encodes a member of the MATE (multidrug and toxin efflux family), expressed in roots but not shoots. Mutants accumulate excess iron, manganese and zinc, and express root Fe(III) chelatase activity even under iron sufficiency conditions. FRD3 is likely to function in root xylem loading of an iron chelator or other factor necessary for efficient iron uptake out of the xylem or apoplastic space and into leaf cells.   | 2605.35 | 1240.37 | 2.10 | 1.47E-05 | 6.14E-05 |
| 426 | 2 | L4 vs. M4 | 258646_at  | AT3G08040 | Galactose oxidase/kelch repeat superfamily protein;(source:Araport11)                                                                                                                                                                                                                                                                                                                                                             | 162.87  | 77.97   | 2.09 | 6.40E-06 | 3.86E-05 |
| 427 | 2 | L4 vs. M4 | 261525_at  | AT1G14330 | nuclear receptor family 2 group C protein;(source:Araport11)                                                                                                                                                                                                                                                                                                                                                                      | 740.17  | 355.81  | 2.08 | 3.80E-05 | 1.23E-04 |
| 428 | 2 | L4 vs. M4 | 254999_at  | AT4G09830 | Encodes a protein with two tandem-arrayed CCCH-type zinc fingers that binds RNA and is involved in RNA turnover. The mRNA is cell-to-cell mobile.                                                                                                                                                                                                                                                                                 | 133.16  | 63.93   | 2.08 | 1.29E-05 | 5.63E-05 |
| 429 | 2 | L4 vs. M4 | 266656_at  | AT2G25900 | purple acid phosphatase 14;(source:Araport11)                                                                                                                                                                                                                                                                                                                                                                                     | 129.21  | 62.48   | 2.07 | 3.69E-04 | 7.26E-04 |
| 430 | 2 | L4 vs. M4 | 266766_at  | AT2G46880 | Encodes a gibberellin 2-oxidase that acts on C19 gibberellins to deactivate them.                                                                                                                                                                                                                                                                                                                                                 | 54.15   | 26.21   | 2.07 | 6.74E-05 | 1.96E-04 |
| 431 | 2 | L4 vs. M4 | 266952_at  | AT2G34555 | Encodes 20S proteasome subunit PAB1 (PAB1).                                                                                                                                                                                                                                                                                                                                                                                       | 71.09   | 34.49   | 2.06 | 5.15E-05 | 1.58E-04 |
| 432 | 2 | L4 vs. M4 | 262716_at  | AT1G16470 | Cytidine triphosphate synthase.                                                                                                                                                                                                                                                                                                                                                                                                   | 433.30  | 211.29  | 2.05 | 7.00E-06 | 4.00E-05 |
| 433 | 2 | L4 vs. M4 | 264529_at  | AT1G30820 | Encodes MRI, a plasma membrane-localized member of the RLCK-VIII subfamily. Preferentially expressed in both pollen tubes and root hairs. mri-knockout mutants display spontaneous pollen tube and root-hair bursting.                                                                                                                                                                                                            | 52.44   | 25.64   | 2.05 | 2.81E-05 | 9.99E-05 |
| 434 | 2 | L4 vs. M4 | 267582_at  | AT2G41970 |                                                                                                                                                                                                                                                                                                                                                                                                                                   | 49.76   | 24.31   | 2.05 | 7.68E-05 | 2.13E-04 |



|     |   |           |                 |           |                                                                                                                                                                                                                                                                                                                                                                                                                                                                             |         |        |      |          |          |
|-----|---|-----------|-----------------|-----------|-----------------------------------------------------------------------------------------------------------------------------------------------------------------------------------------------------------------------------------------------------------------------------------------------------------------------------------------------------------------------------------------------------------------------------------------------------------------------------|---------|--------|------|----------|----------|
| 435 | 2 | L4 vs. M4 | 252090_at       | AT3G52130 | Bifunctional inhibitor/lipid-transfer protein/seed storage 2S albumin superfamily protein;(source:Araport11)                                                                                                                                                                                                                                                                                                                                                                | 97.01   | 47.37  | 2.05 | 3.26E-04 | 6.62E-04 |
| 436 | 2 | L4 vs. M4 | 250576_at       | AT5G08250 | Cytochrome P450 superfamily protein;(source:Araport11)                                                                                                                                                                                                                                                                                                                                                                                                                      | 74.90   | 36.52  | 2.05 | 3.78E-05 | 1.23E-04 |
| 437 | 2 | L4 vs. M4 | 259928_at       | AT1G34380 | 5-3 exonuclease family protein;(source:Araport11)                                                                                                                                                                                                                                                                                                                                                                                                                           | 252.95  | 123.96 | 2.04 | 1.71E-05 | 6.90E-05 |
| 438 | 2 | L4 vs. M4 | 267027_at       | AT2G38330 | MATE efflux family protein;(source:Araport11)                                                                                                                                                                                                                                                                                                                                                                                                                               | 112.84  | 55.20  | 2.04 | 3.75E-04 | 7.33E-04 |
| 439 | 2 | L4 vs. M4 | 246917_at       | AT5G25280 | serine-rich protein-like protein;(source:Araport11)                                                                                                                                                                                                                                                                                                                                                                                                                         | 61.00   | 29.96  | 2.04 | 5.99E-04 | 1.10E-03 |
| 440 | 2 | L4 vs. M4 | 260997_at       | AT1G26610 | C2H2-like zinc finger protein;(source:Araport11)                                                                                                                                                                                                                                                                                                                                                                                                                            | 170.43  | 84.14  | 2.03 | 1.90E-05 | 7.47E-05 |
| 441 | 2 | L4 vs. M4 | 266662_at       | AT2G25830 | YebC-like protein;(source:Araport11)                                                                                                                                                                                                                                                                                                                                                                                                                                        | 251.36  | 123.83 | 2.03 | 3.64E-04 | 7.18E-04 |
| 442 | 2 | L4 vs. M4 | 250334_at       | AT5G11770 | NADH-ubiquinone oxidoreductase 20 kDa subunit;(source:Araport11)                                                                                                                                                                                                                                                                                                                                                                                                            | 1794.75 | 885.87 | 2.03 | 2.88E-05 | 1.02E-04 |
| 443 | 2 | L4 vs. M4 | 260769_at       | AT1G49010 | Duplicated homeodomain-like superfamily protein;(source:Araport11)                                                                                                                                                                                                                                                                                                                                                                                                          | 122.75  | 60.65  | 2.02 | 1.21E-05 | 5.44E-05 |
| 444 | 2 | L4 vs. M4 | 266319_s_a<br>t | AT2G46720 | Encodes KCS13, a member of the 3-ketoacyl-CoA synthase family involved in the biosynthesis of VLCFA (very long chain fatty acids).                                                                                                                                                                                                                                                                                                                                          | 139.60  | 69.23  | 2.02 | 8.16E-05 | 2.22E-04 |
| 445 | 2 | L4 vs. M4 | 250606_s_a<br>t | AT5G07410 | Encodes a pectin methyltransferase implicated in the remodeling of pectins in pollen. Its expression is restricted to the male gametophyte (dry pollen, imbibed pollen and pollen tube). Mutants do not display any phenotype in the vegetative tissues. Pollen germination of KO mutant is strongly delayed in vivo and in vitro. Extra calcium restores the wild type phenotype in vitro.                                                                                 | 767.48  | 379.03 | 2.02 | 1.15E-04 | 2.97E-04 |
| 446 | 2 | L4 vs. M4 | 257333_at       | ATMG01360 | cytochrome c oxidase subunit 1                                                                                                                                                                                                                                                                                                                                                                                                                                              | 523.99  | 259.33 | 2.02 | 9.72E-04 | 1.66E-03 |
| 447 | 2 | L4 vs. M4 | 245968_at       | AT5G19810 | Proline-rich extensin-like family protein;(source:Araport11)                                                                                                                                                                                                                                                                                                                                                                                                                | 67.17   | 33.44  | 2.01 | 8.83E-04 | 1.53E-03 |
| 448 | 2 | L4 vs. M4 | 254830_at       | AT4G12590 | ER membrane protein complex subunit-like protein (Protein of unknown function DUF106, transmembrane);(source:Araport11)                                                                                                                                                                                                                                                                                                                                                     | 212.56  | 106.55 | 1.99 | 2.94E-05 | 1.02E-04 |
| 449 | 2 | L4 vs. M4 | 248961_at       | AT5G45650 | subtilase family protein;(source:Araport11)                                                                                                                                                                                                                                                                                                                                                                                                                                 | 81.72   | 41.14  | 1.99 | 1.25E-04 | 3.15E-04 |
| 450 | 2 | L4 vs. M4 | 256469_at       | AT1G32540 | Encodes a protein with 3 plant-specific zinc finger domains that acts as a positive regulator of cell death.                                                                                                                                                                                                                                                                                                                                                                | 113.56  | 57.25  | 1.98 | 1.16E-05 | 5.28E-05 |
| 451 | 2 | L4 vs. M4 | 263160_at       | AT1G54080 | oligouridylylate-binding protein 1A;(source:Araport11)                                                                                                                                                                                                                                                                                                                                                                                                                      | 290.14  | 146.64 | 1.98 | 2.82E-05 | 1.00E-04 |
| 452 | 2 | L4 vs. M4 | 262313_at       | AT1G70900 | hypothetical protein;(source:Araport11)                                                                                                                                                                                                                                                                                                                                                                                                                                     | 318.68  | 161.26 | 1.98 | 7.18E-04 | 1.27E-03 |
| 453 | 2 | L4 vs. M4 | 258685_at       | AT3G07830 | Pectin lyase-like superfamily protein;(source:Araport11)                                                                                                                                                                                                                                                                                                                                                                                                                    | 235.78  | 119.05 | 1.98 | 1.92E-04 | 4.43E-04 |
| 454 | 2 | L4 vs. M4 | 262399_at       | AT1G49500 | transcription initiation factor TFIID subunit 1b-like protein;(source:Araport11)                                                                                                                                                                                                                                                                                                                                                                                            | 216.91  | 110.24 | 1.97 | 6.27E-05 | 1.83E-04 |
| 455 | 2 | L4 vs. M4 | 264025_at       | AT2G21050 | Encodes LAX2 (LIKE AUXIN RESISTANT), a member of the AUX1 LAX family of auxin influx carriers. Required for the establishment of embryonic root cell organization.                                                                                                                                                                                                                                                                                                          | 59.07   | 29.99  | 1.97 | 1.66E-04 | 3.99E-04 |
| 456 | 2 | L4 vs. M4 | 250993_at       | AT5G02280 | Part of multi-protein complex, acting as guanine nucleotide exchange factors (GEFs) and possibly as tethers, regulating intracellular trafficking. Encodes a member of the Arabidopsis LIM proteins: a family of actin bundlers with distinct expression patterns. WLIM1, WLIM2a, and WLIM2b are widely expressed, whereas PLIM2a, PLIM2b, and PLIM2c are predominantly expressed in pollen. Regulates actin cytoskeleton organization. The mRNA is cell-to-cell mobile.    | 539.01  | 274.05 | 1.97 | 1.13E-04 | 2.91E-04 |
| 457 | 2 | L4 vs. M4 | 261559_at       | AT1G01780 | Encodes a member of the X8-GPI family of proteins. It localizes to the plasmodesmata and binds callose.                                                                                                                                                                                                                                                                                                                                                                     | 53.92   | 27.58  | 1.96 | 3.63E-04 | 7.18E-04 |
| 458 | 2 | L4 vs. M4 | 250565_at       | AT5G08000 | Encodes magnesium chelatase involved in plastid-to-nucleus signal transduction.                                                                                                                                                                                                                                                                                                                                                                                             | 497.27  | 253.41 | 1.96 | 1.17E-04 | 3.00E-04 |
| 459 | 2 | L4 vs. M4 | 250243_at       | AT5G13630 | member of SEC22 Gene Family                                                                                                                                                                                                                                                                                                                                                                                                                                                 | 394.15  | 201.15 | 1.96 | 2.48E-04 | 5.40E-04 |
| 460 | 2 | L4 vs. M4 | 264373_at       | AT1G11890 | C-type mannose receptor (DUF620);(source:Araport11)                                                                                                                                                                                                                                                                                                                                                                                                                         | 799.59  | 409.86 | 1.95 | 1.90E-04 | 4.41E-04 |
| 461 | 2 | L4 vs. M4 | 262922_at       | AT1G79420 | one of the type IIB calcium pump isoforms. encodes an autoinhibited Ca(2+)-ATPase that contains an N-terminal calmodulin binding autoinhibitory domain.                                                                                                                                                                                                                                                                                                                     | 59.19   | 30.31  | 1.95 | 1.25E-04 | 3.14E-04 |
| 462 | 2 | L4 vs. M4 | 258035_at       | AT3G21180 |                                                                                                                                                                                                                                                                                                                                                                                                                                                                             | 75.23   | 38.67  | 1.95 | 5.15E-05 | 1.58E-04 |
| 463 | 2 | L4 vs. M4 | 250206_at       | AT5G14040 | Encodes a mitochondrial phosphate transporter. Modulates plant responses to salt stress.                                                                                                                                                                                                                                                                                                                                                                                    | 1582.72 | 809.65 | 1.95 | 7.25E-05 | 2.05E-04 |
| 464 | 2 | L4 vs. M4 | 248200_at       | AT5G54160 | A caffeic acid/5-hydroxyferulic acid O-methyltransferase. Interacts with 14-4-3 proteins in yeast 2 hybrid assay. AtOMT1 (At5g54160) encodes a flavonol 3?-O-methyltransferase that is highly active towards quercetin and myricetin. The substrate specificity identifies the enzyme as flavonol 3?-methyltransferase which replaces the former annotation of the gene to encode a caffeic acid/5-hydroxyferulic acid O-methyltransferase The mRNA is cell-to-cell mobile. | 1285.72 | 658.70 | 1.95 | 4.31E-05 | 1.37E-04 |
| 465 | 2 | L4 vs. M4 | 260903_at       | AT1G02460 | Pectin lyase-like superfamily protein;(source:Araport11)                                                                                                                                                                                                                                                                                                                                                                                                                    | 340.40  | 175.70 | 1.94 | 1.39E-04 | 3.43E-04 |
| 466 | 2 | L4 vs. M4 | 248663_at       | AT5G48590 | phosphoserine aminotransferase, putative (DUF760);(source:Araport11)                                                                                                                                                                                                                                                                                                                                                                                                        | 150.60  | 78.11  | 1.93 | 6.75E-05 | 1.96E-04 |
| 467 | 2 | L4 vs. M4 | 260352_at       | AT1G69295 | Encodes a member of the X8-GPI family of proteins. It localizes to the plasmodesmata and is predicted to bind callose.                                                                                                                                                                                                                                                                                                                                                      | 145.71  | 75.97  | 1.92 | 2.53E-04 | 5.46E-04 |

|     |   |           |                 |           |                                                                                                                                                                                                                                                                                                                                                                                                                                                                                                                                                          |        |        |      |          |          |
|-----|---|-----------|-----------------|-----------|----------------------------------------------------------------------------------------------------------------------------------------------------------------------------------------------------------------------------------------------------------------------------------------------------------------------------------------------------------------------------------------------------------------------------------------------------------------------------------------------------------------------------------------------------------|--------|--------|------|----------|----------|
| 468 | 2 | L4 vs. M4 | 267034_at       | AT2G38310 | Encodes a member of the PYR (pyrabactin resistance )/PYL(PYR1-like)/RCAR (regulatory components of ABA receptor) family proteins with 14 members. PYR/PYL/RCAR family proteins function as abscisic acid sensors. Mediate ABA-dependent regulation of protein phosphatase 2Cs AB11 and AB12. The mRNA is cell-to-cell mobile.                                                                                                                                                                                                                            | 54.78  | 28.48  | 1.92 | 5.41E-05 | 1.62E-04 |
| 469 | 2 | L4 vs. M4 | 262038_at       | AT1G35580 | CINV1 / A/N-Invg is an alkaline/neutral invertase that breaks sucrose down into fructose and glucose (GH100). The exact localization of CINV1 remains under investigation but there is evidence that fluorescently-tagged CINV1 localizes to the cytoplasm. atinvg mutants have reduced root growth, reduced invertase activity, and increased expression of antioxidant genes under basal conditions. The levels of CINV1 / A/N-Invg transcripts rise in response to a hydrogen peroxide treatment. The protein has been shown to interact with PIP5K9. | 143.76 | 75.46  | 1.91 | 3.51E-05 | 1.17E-04 |
| 470 | 2 | L4 vs. M4 | 258392_at       | AT3G15400 | Encodes a protein with novel repeat sequences and a glycine-rich domain which has a 53% identity to GRP1, a petunia glycine-rich cell wall protein.                                                                                                                                                                                                                                                                                                                                                                                                      | 599.36 | 314.48 | 1.91 | 1.28E-04 | 3.19E-04 |
| 471 | 2 | L4 vs. M4 | 255479_at       | AT4G02380 | Encodes AtLEA5 (late embryogenesis abundant like protein). Also known as SENESCENCE-ASSOCIATED GENE 21 (SAG21). Has a role on oxidative stress tolerance. mRNA levels are elevated in response to various stresses.                                                                                                                                                                                                                                                                                                                                      | 95.74  | 50.72  | 1.89 | 1.22E-04 | 3.10E-04 |
| 472 | 2 | L4 vs. M4 | 253880_at       | AT4G27590 | Heavy metal transport/detoxification superfamily protein;(source:Araport11)                                                                                                                                                                                                                                                                                                                                                                                                                                                                              | 70.31  | 37.23  | 1.89 | 4.14E-05 | 1.33E-04 |
| 473 | 2 | L4 vs. M4 | 267489_s_a<br>t | AT4G30100 | P-loop containing nucleoside triphosphate hydrolases superfamily protein;(source:Araport11)<br>Encodes RVE4, a homolog of the circadian rhythm regulator RVE8. rve4 rve6 rve8 triple mutants display an extremely long circadian period, with delayed and reduced expression of evening-phased clock genes. Involved in heat shock response.                                                                                                                                                                                                             | 55.37  | 29.32  | 1.89 | 1.97E-04 | 4.53E-04 |
| 474 | 2 | L4 vs. M4 | 250972_at       | AT5G02840 | phosphatidylinositol-specific phospholipase C is induced to a significant extent under various environmental stresses, such as dehydration, salinity, and low temperature. May play a role in secondary ABA response. There are two genes called ATPLC1, one corresponding to AT4g38530 and one corresponding to AT5g58670 (this one).                                                                                                                                                                                                                   | 52.42  | 27.73  | 1.89 | 2.58E-05 | 9.36E-05 |
| 475 | 2 | L4 vs. M4 | 247794_at       | AT5G58670 | germin-like protein (GLP1)                                                                                                                                                                                                                                                                                                                                                                                                                                                                                                                               | 72.19  | 38.12  | 1.89 | 7.18E-05 | 2.04E-04 |
| 476 | 2 | L4 vs. M4 | 259892_at       | AT1G72610 |                                                                                                                                                                                                                                                                                                                                                                                                                                                                                                                                                          | 434.98 | 231.41 | 1.88 | 1.04E-04 | 2.75E-04 |
| 477 | 2 | L4 vs. M4 | 252871_at       | AT4G40000 | S-adenosyl-L-methionine-dependent methyltransferases superfamily protein;(source:Araport11)                                                                                                                                                                                                                                                                                                                                                                                                                                                              | 138.32 | 73.67  | 1.88 | 3.39E-04 | 6.84E-04 |
| 478 | 2 | L4 vs. M4 | 244974_at       | ATCG00700 | PSII low MW protein<br>encodes a 2-alkenal reductase (EC 1.3.1.74), plays a key role in the detoxification of reactive carbonyls                                                                                                                                                                                                                                                                                                                                                                                                                         | 104.04 | 55.42  | 1.88 | 6.38E-04 | 1.16E-03 |
| 479 | 2 | L4 vs. M4 | 246463_at       | AT5G16970 | Ribosomal protein S4;(source:Araport11)                                                                                                                                                                                                                                                                                                                                                                                                                                                                                                                  | 61.21  | 32.78  | 1.87 | 7.57E-04 | 1.33E-03 |
| 480 | 2 | L4 vs. M4 | 249427_at       | AT5G39850 | COBRA-like protein 10 precursor;(source:Araport11)                                                                                                                                                                                                                                                                                                                                                                                                                                                                                                       | 305.81 | 163.29 | 1.87 | 5.25E-05 | 1.59E-04 |
| 481 | 2 | L4 vs. M4 | 257082_at       | AT3G20580 | Part of the AtHVA22a family. Protein expression is ABA- and stress-inducible.                                                                                                                                                                                                                                                                                                                                                                                                                                                                            | 34.37  | 18.62  | 1.85 | 1.79E-04 | 4.23E-04 |
| 482 | 2 | L4 vs. M4 | 260238_at       | AT1G74520 | RAB GTPase homolog 7A;(source:Araport11)                                                                                                                                                                                                                                                                                                                                                                                                                                                                                                                 | 184.40 | 100.04 | 1.84 | 6.05E-05 | 1.78E-04 |
| 483 | 2 | L4 vs. M4 | 263876_at       | AT2G21880 |                                                                                                                                                                                                                                                                                                                                                                                                                                                                                                                                                          | 143.20 | 77.88  | 1.84 | 3.89E-04 | 7.56E-04 |
| 484 | 2 | L4 vs. M4 | 258054_at       | AT3G16240 | Delta tonoplast intrinsic protein, functions as a water channel and ammonium (NH3) transporter. Highly expressed in flower, shoot, and stem. Expression shows diurnal regulation and is induced by ammonium (NH3). Protein localized to vacuolar membrane. The mRNA is cell-to-cell mobile. Encodes a proline oxidase that is predicted to localize to the inner mitochondrial membrane, its mRNA expression induced by high levels of AI and by osmotic stress. The promoter contains an L-proline-inducible element.                                   | 367.84 | 199.98 | 1.84 | 8.07E-05 | 2.21E-04 |
| 485 | 2 | L4 vs. M4 | 257315_at       | AT3G30775 | Beta-galactosidase related protein;(source:Araport11)                                                                                                                                                                                                                                                                                                                                                                                                                                                                                                    | 362.16 | 196.69 | 1.84 | 3.30E-04 | 6.70E-04 |
| 486 | 2 | L4 vs. M4 | 251127_at       | AT5G01080 | Auxin-responsive GH3 family protein;(source:Araport11)                                                                                                                                                                                                                                                                                                                                                                                                                                                                                                   | 109.32 | 59.38  | 1.84 | 5.42E-05 | 1.62E-04 |
| 487 | 2 | L4 vs. M4 | 250293_s_a      | AT5G13360 | UDP-Glycosyltransferase superfamily protein;(source:Araport11)                                                                                                                                                                                                                                                                                                                                                                                                                                                                                           | 245.41 | 133.05 | 1.84 | 2.11E-04 | 4.75E-04 |
| 488 | 2 | L4 vs. M4 | 247163_at       | AT5G65685 | encodes a fatty acid hydroxylase, required for the AtBI-1-mediated suppression of programmed cell death.                                                                                                                                                                                                                                                                                                                                                                                                                                                 | 321.23 | 174.41 | 1.84 | 3.08E-04 | 6.41E-04 |
| 489 | 2 | L4 vs. M4 | 265459_at       | AT2G46540 | member of CYP86C                                                                                                                                                                                                                                                                                                                                                                                                                                                                                                                                         | 246.75 | 134.66 | 1.83 | 5.63E-05 | 1.67E-04 |
| 490 | 2 | L4 vs. M4 | 254448_at       | AT4G20870 | tRNA-processing ribonuclease BN;(source:Araport11)                                                                                                                                                                                                                                                                                                                                                                                                                                                                                                       | 259.27 | 142.04 | 1.83 | 6.48E-04 | 1.17E-03 |
| 491 | 2 | L4 vs. M4 | 262765_at       | AT1G13150 | Uncharacterized protein;(source:Araport11)                                                                                                                                                                                                                                                                                                                                                                                                                                                                                                               | 178.67 | 98.19  | 1.82 | 6.48E-04 | 1.17E-03 |
| 492 | 2 | L4 vs. M4 | 261296_at       | AT1G48460 |                                                                                                                                                                                                                                                                                                                                                                                                                                                                                                                                                          | 235.29 | 129.04 | 1.82 | 9.64E-05 | 2.58E-04 |
| 493 | 2 | L4 vs. M4 | 260493_at       | AT2G41830 | Core-2/l-branching beta-1,6-N-acetylglucosaminyltransferase family protein;(source:Araport11)                                                                                                                                                                                                                                                                                                                                                                                                                                                            | 291.03 | 160.12 | 1.82 | 6.84E-04 | 1.22E-03 |
| 494 | 2 | L4 vs. M4 | 250194_at       | AT5G14550 | RmlC-like cupins superfamily protein;(source:Araport11)                                                                                                                                                                                                                                                                                                                                                                                                                                                                                                  | 53.74  | 29.58  | 1.82 | 4.04E-04 | 7.79E-04 |
| 495 | 2 | L4 vs. M4 | 246841_at       | AT5G26700 |                                                                                                                                                                                                                                                                                                                                                                                                                                                                                                                                                          | 97.09  | 53.40  | 1.82 | 8.86E-04 | 1.53E-03 |

|     |   |           |            |           |                                                                                                                                                                                                                                                                                                                                                                                                                                                                                                                                                          |         |        |      |          |          |
|-----|---|-----------|------------|-----------|----------------------------------------------------------------------------------------------------------------------------------------------------------------------------------------------------------------------------------------------------------------------------------------------------------------------------------------------------------------------------------------------------------------------------------------------------------------------------------------------------------------------------------------------------------|---------|--------|------|----------|----------|
| 496 | 2 | L4 vs. M4 | 267239_at  | AT2G02510 | NADH dehydrogenase (ubiquinone)s;(source:Araport11)                                                                                                                                                                                                                                                                                                                                                                                                                                                                                                      | 165.83  | 91.81  | 1.81 | 3.61E-04 | 7.18E-04 |
| 497 | 2 | L4 vs. M4 | 250288_at  | AT5G13350 | Auxin-responsive GH3 family protein;(source:Araport11)                                                                                                                                                                                                                                                                                                                                                                                                                                                                                                   | 261.25  | 144.39 | 1.81 | 1.99E-04 | 4.55E-04 |
| 498 | 2 | L4 vs. M4 | 265576_at  | AT2G20190 | Encodes a microtubule-associated protein that is involved in both cell division and cell expansion. It likely promotes microtubule stability.                                                                                                                                                                                                                                                                                                                                                                                                            | 108.90  | 60.52  | 1.80 | 1.37E-04 | 3.40E-04 |
| 499 | 2 | L4 vs. M4 | 266636_at  | AT2G35370 | Encodes glycine decarboxylase complex H protein. Involved in photorespiration. The mRNA is cell-to-cell mobile.                                                                                                                                                                                                                                                                                                                                                                                                                                          | 91.42   | 50.86  | 1.80 | 5.76E-04 | 1.07E-03 |
| 500 | 2 | L4 vs. M4 | 266981_at  | AT2G39460 | Encodes a 60S ribosomal protein L23aA (AtrpL23aA). Paralog of RLPL23aB.                                                                                                                                                                                                                                                                                                                                                                                                                                                                                  | 150.22  | 83.54  | 1.80 | 6.42E-04 | 1.16E-03 |
| 501 | 2 | L4 vs. M4 | 266750_s_a |           | Share high homologies with a group of pectin methylesterases (PME), pollen specific, and is required for enhancing the growth of pollen tube in style and transmitting tract tissues.                                                                                                                                                                                                                                                                                                                                                                    | 845.19  | 470.75 | 1.80 | 1.45E-04 | 3.54E-04 |
| 502 | 2 | L4 vs. M4 | 258636_at  | AT3G07890 | Ypt/Rab-GAP domain of gyp1p superfamily protein;(source:Araport11)                                                                                                                                                                                                                                                                                                                                                                                                                                                                                       | 141.71  | 78.88  | 1.80 | 3.02E-04 | 6.29E-04 |
| 503 | 2 | L4 vs. M4 | 250862_s_a | AT5G04800 | Ribosomal S17 family protein;(source:Araport11)                                                                                                                                                                                                                                                                                                                                                                                                                                                                                                          | 747.71  | 415.58 | 1.80 | 2.19E-04 | 4.88E-04 |
| 504 | 2 | L4 vs. M4 | 248957_at  | AT5G45620 | Proteasome component (PCI) domain protein;(source:Araport11)                                                                                                                                                                                                                                                                                                                                                                                                                                                                                             | 202.14  | 112.39 | 1.80 | 3.13E-04 | 6.46E-04 |
| 505 | 2 | L4 vs. M4 | 259416_at  | AT1G02305 | Encodes a capase involved in stress induced cell death.                                                                                                                                                                                                                                                                                                                                                                                                                                                                                                  | 1483.27 | 830.12 | 1.79 | 4.03E-04 | 7.79E-04 |
| 506 | 2 | L4 vs. M4 | 260228_at  | AT1G74540 | Encodes a tricarumaroylspermidine / triferuloylspermidine meta-hydroxylase that participates in the formation of N<sup>1</sup>-N<sup>5</sup>-di(hydroxyferuloyl)- N<sup>10</sup>-sinapoyl spermidine, an important constituent of pollen. This gene appears to be expressed in young flower buds and inflorescence tips with notably high levels of expression in the tapetum and pollen.                                                                                                                                                                | 439.36  | 245.72 | 1.79 | 9.85E-05 | 2.62E-04 |
| 507 | 2 | L4 vs. M4 | 259192_at  | AT3G01740 | Mitochondrial ribosomal protein L37;(source:Araport11)                                                                                                                                                                                                                                                                                                                                                                                                                                                                                                   | 75.45   | 42.37  | 1.78 | 1.99E-04 | 4.55E-04 |
| 508 | 2 | L4 vs. M4 | 246004_at  | AT5G20630 | Encodes a germin-like protein. Its transcripts are more abundant in RNA from leaves collected in the evening, suggesting some kind of circadian regulation.                                                                                                                                                                                                                                                                                                                                                                                              | 122.70  | 68.81  | 1.78 | 6.53E-04 | 1.17E-03 |
| 509 | 2 | L4 vs. M4 | 267383_at  | AT2G44360 | ecotropic viral integration site protein;(source:Araport11)                                                                                                                                                                                                                                                                                                                                                                                                                                                                                              | 241.69  | 136.47 | 1.77 | 2.20E-04 | 4.88E-04 |
| 510 | 2 | L4 vs. M4 | 262121_at  | AT1G02800 | Encodes a protein with similarity to endo-1,4-b-glucanases and is a member of Glycoside Hydrolase Family 9. CEL2 is induced by nematodes and is expressed in syncytia induced by Heterodera schachtii. May be involved in the development and function of syncytia.                                                                                                                                                                                                                                                                                      | 313.49  | 177.83 | 1.76 | 5.46E-04 | 1.02E-03 |
| 511 | 2 | L4 vs. M4 | 259498_at  | AT1G15880 | Golgi SNARE 11 protein (GOS11)                                                                                                                                                                                                                                                                                                                                                                                                                                                                                                                           | 933.98  | 531.05 | 1.76 | 3.64E-04 | 7.18E-04 |
| 512 | 2 | L4 vs. M4 | 259635_at  | AT1G56360 | purple acid phosphatase 6;(source:Araport11)                                                                                                                                                                                                                                                                                                                                                                                                                                                                                                             | 26.61   | 15.13  | 1.76 | 3.36E-04 | 6.79E-04 |
| 513 | 2 | L4 vs. M4 | 264040_at  | AT2G03730 | Member of a small family of ACT domain containing proteins. ACT domains are thought to be involved in amino acid binding.                                                                                                                                                                                                                                                                                                                                                                                                                                | 101.27  | 57.44  | 1.76 | 3.52E-04 | 7.05E-04 |
| 514 | 2 | L4 vs. M4 | 264246_at  | AT1G60140 | Encodes an enzyme putatively involved in trehalose biosynthesis. The protein has a trehalose synthase (TPS)-like domain that may or may not be active as well as a trehalose phosphatase (TPP)-like domain.                                                                                                                                                                                                                                                                                                                                              | 91.12   | 52.18  | 1.75 | 3.17E-04 | 6.51E-04 |
| 515 | 2 | L4 vs. M4 | 263950_at  | AT2G36020 | HVA22-like protein J;(source:Araport11)                                                                                                                                                                                                                                                                                                                                                                                                                                                                                                                  | 46.26   | 26.41  | 1.75 | 4.73E-04 | 8.97E-04 |
| 516 | 2 | L4 vs. M4 | 254001_at  | AT4G26260 | Encodes a myo-inositol oxygenase, which is the first enzyme in the inositol route to ascorbate (L&#8208;ascorbic acid, AsA, vitamin C). Overexpression results in enhanced biomass and abiotic stress tolerance.                                                                                                                                                                                                                                                                                                                                         | 48.73   | 27.84  | 1.75 | 3.26E-04 | 6.62E-04 |
| 517 | 2 | L4 vs. M4 | 248127_at  | AT5G54750 | Part of multi-protein complex, acting as guanine nucleotide exchange factors (GEFs) and possibly as tethers, regulating intracellular trafficking.                                                                                                                                                                                                                                                                                                                                                                                                       | 380.86  | 218.88 | 1.74 | 3.52E-04 | 7.05E-04 |
| 518 | 2 | L4 vs. M4 | 259838_at  | AT1G52220 | Thylakoid membrane localized protein that interacts with other CURT family proteins. Oligomerization is associated with grana thylakoid curvature.                                                                                                                                                                                                                                                                                                                                                                                                       | 73.90   | 42.76  | 1.73 | 4.13E-04 | 7.92E-04 |
| 519 | 2 | L4 vs. M4 | 262162_at  | AT1G78020 | FCS like zinc finger 6 is induced during energy starvation through SnRK1 signaling. Mutants accumulate more SnRK1alpha1 which results in the inhibition of seedling growth under favorable growth conditions. Increased SnRK1 activity in the mutant also results in the downregulation of TOR signaling (DOI:10.1111/tpj.13854).                                                                                                                                                                                                                        | 131.62  | 75.93  | 1.73 | 1.87E-04 | 4.35E-04 |
| 520 | 2 | L4 vs. M4 | 253950_at  | AT4G26910 | Dihydrolipoamide succinyltransferase;(source:Araport11)                                                                                                                                                                                                                                                                                                                                                                                                                                                                                                  | 375.57  | 216.87 | 1.73 | 6.77E-04 | 1.21E-03 |
| 521 | 2 | L4 vs. M4 | 266591_at  | AT2G46225 | Encodes a subunit of the WAVE complex. The WAVE complex is required for activation of ARP2/3 complex which functions in actin microfilament nucleation and branching. One of four ABI-like proteins.                                                                                                                                                                                                                                                                                                                                                     | 93.54   | 54.51  | 1.72 | 2.96E-04 | 6.19E-04 |
| 522 | 2 | L4 vs. M4 | 250739_at  | AT5G05740 | S2P-like putative metalloprotease, also contain transmembrane helices near their C-termini and many of them, five of seven, contain a conserved zinc-binding motif HEXXH. Homolog of EGY1. Each of the EGY1 and EGY-like proteins share two additional highly conserved motifs, the previously reported NPDG motif (aa 442-454 in EGY1, Rudner et al., 1999) and a newly defined GNLR motif (aa 171-179 in EGY1). The GNLR motif is a novel signature motif unique to EGY1 and EGY-like proteins as well as other EGY1 orthologs found in cyanobacteria. | 300.60  | 174.57 | 1.72 | 2.23E-04 | 4.94E-04 |

|     |   |           |           |           |                                                                                                                                                                                                                                                                                                                                                                                                                                                                                                                                                                                                                                                                                                                                                                                                                                                                                                                                                                                                                                                                         |         |         |      |          |          |
|-----|---|-----------|-----------|-----------|-------------------------------------------------------------------------------------------------------------------------------------------------------------------------------------------------------------------------------------------------------------------------------------------------------------------------------------------------------------------------------------------------------------------------------------------------------------------------------------------------------------------------------------------------------------------------------------------------------------------------------------------------------------------------------------------------------------------------------------------------------------------------------------------------------------------------------------------------------------------------------------------------------------------------------------------------------------------------------------------------------------------------------------------------------------------------|---------|---------|------|----------|----------|
| 523 | 2 | L4 vs. M4 | 249645_at | AT5G36910 | Encodes a thionin that is expressed at a low basal level in seedlings and shows circadian variation. Predicted to encode a PR (pathogenesis-related) protein. Belongs to the plant thionin (PR-13) family with the following members: At1g66100, At5g36910, At1g72260, At2g15010, At1g12663, At1g12660.<br>acyl-CoA thioesterase II;(source:Araport11)<br>Encodes one of two Arabidopsis proteins with significant similarity to the histone fold TBP-associated factor TAF6. Mutants are embryo lethal and transmission of the mutant allele through the male gametophyte is significantly reduced. This is due to reduced pollen tube growth of the mutant.<br>CAP (Cysteine-rich secretory proteins, Antigen 5, and Pathogenesis-related 1 protein) superfamily protein;(source:Araport11)<br>secE/sec61-gamma protein transport protein;(source:Araport11)<br>encodes a basic chitinase involved in ethylene/jasmonic acid mediated signalling pathway during systemic acquired resistance based on expression analyses.<br>hypothetical protein;(source:Araport11) | 114.46  | 66.71   | 1.72 | 2.90E-04 | 6.09E-04 |
| 524 | 2 | L4 vs. M4 | 261560_at | AT1G01710 |                                                                                                                                                                                                                                                                                                                                                                                                                                                                                                                                                                                                                                                                                                                                                                                                                                                                                                                                                                                                                                                                         | 147.11  | 86.49   | 1.70 | 3.05E-04 | 6.35E-04 |
| 525 | 2 | L4 vs. M4 | 261126_at | AT1G04950 | CAP (Cysteine-rich secretory proteins, Antigen 5, and Pathogenesis-related 1 protein) superfamily protein;(source:Araport11)                                                                                                                                                                                                                                                                                                                                                                                                                                                                                                                                                                                                                                                                                                                                                                                                                                                                                                                                            | 195.50  | 115.02  | 1.70 | 2.88E-04 | 6.06E-04 |
| 526 | 2 | L4 vs. M4 | 265587_at | AT2G19980 | secE/sec61-gamma protein transport protein;(source:Araport11)                                                                                                                                                                                                                                                                                                                                                                                                                                                                                                                                                                                                                                                                                                                                                                                                                                                                                                                                                                                                           | 41.74   | 24.61   | 1.70 | 7.27E-04 | 1.28E-03 |
| 527 | 2 | L4 vs. M4 | 254083_at | AT4G24920 | encodes a basic chitinase involved in ethylene/jasmonic acid mediated signalling pathway during systemic acquired resistance based on expression analyses.                                                                                                                                                                                                                                                                                                                                                                                                                                                                                                                                                                                                                                                                                                                                                                                                                                                                                                              | 79.12   | 46.49   | 1.70 | 3.16E-04 | 6.50E-04 |
| 528 | 2 | L4 vs. M4 | 256243_at | AT3G12500 | hypothetical protein;(source:Araport11)                                                                                                                                                                                                                                                                                                                                                                                                                                                                                                                                                                                                                                                                                                                                                                                                                                                                                                                                                                                                                                 | 384.14  | 228.22  | 1.68 | 3.72E-04 | 7.29E-04 |
| 529 | 2 | L4 vs. M4 | 260264_at | AT1G68500 |                                                                                                                                                                                                                                                                                                                                                                                                                                                                                                                                                                                                                                                                                                                                                                                                                                                                                                                                                                                                                                                                         | 216.12  | 129.53  | 1.67 | 6.22E-04 | 1.14E-03 |
| 530 | 2 | L4 vs. M4 | 260775_at | AT1G78300 | G-box binding factor GF14 omega encoding a 14-3-3 protein The mRNA is cell-to-cell mobile.                                                                                                                                                                                                                                                                                                                                                                                                                                                                                                                                                                                                                                                                                                                                                                                                                                                                                                                                                                              | 386.54  | 230.94  | 1.67 | 6.52E-04 | 1.17E-03 |
| 531 | 2 | L4 vs. M4 | 259349_at | AT3G03860 | Encodes a protein disulfide isomerase-like (PDIL) protein, a member of a multigene family within the thioredoxin (TRX) superfamily. This protein also belongs to the adenosine 5'-phosphosulfate reductase-like (APRL) group. The mRNA is cell-to-cell mobile.<br>hypothetical protein;(source:Araport11)<br>Proline-rich extensin-like family protein;(source:Araport11)<br>Encodes a 3-methyladenine-DNA glycosylase. Arabidopsis cDNA complements the methyl methanesulfonate-sensitive phenotype of an Escherichia coli double mutant deficient in 3-methyladenine glycosylases (DNA-3-methyladenine glycosidases I and II, EC 3.2.2.20 and 3.2.2.21, respectively, encoded by tag and alkA).<br>DHHC-type zinc finger family protein;(source:Araport11)<br>Involved in response to salt stress. Knockout mutants are hypersensitive to salt stress. The mRNA is cell-to-cell mobile.                                                                                                                                                                               | 210.51  | 126.39  | 1.67 | 5.96E-04 | 1.10E-03 |
| 532 | 2 | L4 vs. M4 | 255456_at | AT4G02920 |                                                                                                                                                                                                                                                                                                                                                                                                                                                                                                                                                                                                                                                                                                                                                                                                                                                                                                                                                                                                                                                                         | 24.29   | 14.52   | 1.67 | 8.29E-04 | 1.44E-03 |
| 533 | 2 | L4 vs. M4 | 251842_at | AT3G54580 |                                                                                                                                                                                                                                                                                                                                                                                                                                                                                                                                                                                                                                                                                                                                                                                                                                                                                                                                                                                                                                                                         | 40.54   | 24.35   | 1.66 | 5.97E-04 | 1.10E-03 |
| 534 | 2 | L4 vs. M4 | 256664_at | AT3G12040 | DHHC-type zinc finger family protein;(source:Araport11)<br>Involved in response to salt stress. Knockout mutants are hypersensitive to salt stress. The mRNA is cell-to-cell mobile.                                                                                                                                                                                                                                                                                                                                                                                                                                                                                                                                                                                                                                                                                                                                                                                                                                                                                    | 60.28   | 36.79   | 1.64 | 9.39E-04 | 1.61E-03 |
| 535 | 2 | L4 vs. M4 | 257808_at | AT3G26935 |                                                                                                                                                                                                                                                                                                                                                                                                                                                                                                                                                                                                                                                                                                                                                                                                                                                                                                                                                                                                                                                                         | 74.61   | 45.48   | 1.64 | 4.77E-04 | 9.02E-04 |
| 536 | 2 | L4 vs. M4 | 262609_at | AT1G13930 |                                                                                                                                                                                                                                                                                                                                                                                                                                                                                                                                                                                                                                                                                                                                                                                                                                                                                                                                                                                                                                                                         | 821.29  | 507.25  | 1.62 | 8.94E-04 | 1.54E-03 |
| 537 | 2 | L4 vs. M4 | 245015_at | ATCG00490 | large subunit of RUBISCO. Protein is tyrosine-phosphorylated and its phosphorylation state is modulated in response to ABA in Arabidopsis thaliana seeds.<br>Encodes a member of the fructokinase gene family. Nomenclature according to Riggs 2017 has been adopted for the family by the community (personal communication, Boernke, Callis, Granot, Boernke, and Smeekens).                                                                                                                                                                                                                                                                                                                                                                                                                                                                                                                                                                                                                                                                                          | 7402.27 | 4670.41 | 1.58 | 9.88E-04 | 1.68E-03 |
| 538 | 2 | L4 vs. M4 | 263250_at | AT2G31390 | RAB geranylgeranyl transferase beta subunit 2;(source:Araport11)<br>acyl-UDP-N-acetylglucosamine O-acyltransferase;(source:Araport11)<br>encodes a type I serine/threonine protein phosphatase expressed in expressed in roots, rosettes and flowers.<br>Mo25 family protein;(source:Araport11)<br>Encodes one of the 36 carboxylate clamp (CC)-tetratricopeptide repeat (TPR) proteins (Prasad 2010, Pubmed ID: 20856808) with potential to interact with Hsp90/Hsp70 as co-chaperones. The mRNA is cell-to-cell mobile.                                                                                                                                                                                                                                                                                                                                                                                                                                                                                                                                               | 127.94  | 205.80  | 0.62 | 7.49E-04 | 1.32E-03 |
| 539 | 2 | L4 vs. M4 | 256276_at | AT3G12070 |                                                                                                                                                                                                                                                                                                                                                                                                                                                                                                                                                                                                                                                                                                                                                                                                                                                                                                                                                                                                                                                                         | 345.06  | 554.83  | 0.62 | 9.22E-04 | 1.58E-03 |
| 540 | 2 | L4 vs. M4 | 253805_at | AT4G28260 |                                                                                                                                                                                                                                                                                                                                                                                                                                                                                                                                                                                                                                                                                                                                                                                                                                                                                                                                                                                                                                                                         | 78.85   | 126.90  | 0.62 | 7.88E-04 | 1.38E-03 |
| 541 | 2 | L4 vs. M4 | 249126_at | AT5G43380 | Encodes one of the 36 carboxylate clamp (CC)-tetratricopeptide repeat (TPR) proteins (Prasad 2010, Pubmed ID: 20856808) with potential to interact with Hsp90/Hsp70 as co-chaperones. The mRNA is cell-to-cell mobile.                                                                                                                                                                                                                                                                                                                                                                                                                                                                                                                                                                                                                                                                                                                                                                                                                                                  | 62.62   | 100.82  | 0.62 | 9.76E-04 | 1.66E-03 |
| 542 | 2 | L4 vs. M4 | 248751_at | AT5G47540 |                                                                                                                                                                                                                                                                                                                                                                                                                                                                                                                                                                                                                                                                                                                                                                                                                                                                                                                                                                                                                                                                         | 115.67  | 187.77  | 0.62 | 7.17E-04 | 1.27E-03 |
| 543 | 2 | L4 vs. M4 | 262691_at | AT1G62740 | receptor-like serine/threonine kinase (RKF3) The mRNA is cell-to-cell mobile.<br>Encodes a NAC domain transcription factor that interacts with VND7 and negatively regulates xylem vessel formation.                                                                                                                                                                                                                                                                                                                                                                                                                                                                                                                                                                                                                                                                                                                                                                                                                                                                    | 184.72  | 301.74  | 0.61 | 4.50E-04 | 8.57E-04 |
| 544 | 2 | L4 vs. M4 | 265772_at | AT2G48010 |                                                                                                                                                                                                                                                                                                                                                                                                                                                                                                                                                                                                                                                                                                                                                                                                                                                                                                                                                                                                                                                                         | 46.80   | 76.51   | 0.61 | 7.85E-04 | 1.37E-03 |
| 545 | 2 | L4 vs. M4 | 245987_at | AT5G13180 | nucleotide-sensitive chloride conductance regulator (ICln) family protein;(source:Araport11)<br>Big1;(source:Araport11)                                                                                                                                                                                                                                                                                                                                                                                                                                                                                                                                                                                                                                                                                                                                                                                                                                                                                                                                                 | 142.99  | 236.15  | 0.61 | 3.92E-04 | 7.60E-04 |
| 546 | 2 | L4 vs. M4 | 247449_at | AT5G62290 | Encodes one of the 36 carboxylate clamp (CC)-tetratricopeptide repeat (TPR) proteins (Prasad 2010, Pubmed ID: 20856808) with potential to interact with Hsp90/Hsp70 as co-chaperones. The TTL family is required for osmotic stress tolerance and male sporogenesis.                                                                                                                                                                                                                                                                                                                                                                                                                                                                                                                                                                                                                                                                                                                                                                                                    | 88.38   | 147.25  | 0.60 | 7.81E-04 | 1.37E-03 |
| 547 | 2 | L4 vs. M4 | 264590_at | AT2G17710 |                                                                                                                                                                                                                                                                                                                                                                                                                                                                                                                                                                                                                                                                                                                                                                                                                                                                                                                                                                                                                                                                         |         |         |      |          |          |
| 548 | 2 | L4 vs. M4 | 251584_at | AT3G58620 | Encodes one of three A. thaliana ATP-sulfurylases. APS is the first enzyme of sulfate assimilation that catalyzes the formation of adenosine-5'-phosphosulfate from ATP and sulfate.                                                                                                                                                                                                                                                                                                                                                                                                                                                                                                                                                                                                                                                                                                                                                                                                                                                                                    | 20.26   | 33.78   | 0.60 | 3.60E-04 | 7.18E-04 |
| 549 | 2 | L4 vs. M4 | 245254_at | AT4G14680 |                                                                                                                                                                                                                                                                                                                                                                                                                                                                                                                                                                                                                                                                                                                                                                                                                                                                                                                                                                                                                                                                         | 68.26   | 114.64  | 0.60 | 4.27E-04 | 8.17E-04 |

|     |   |           |             |           |                                                                                                                                                                                                                                                                                                                                                                                                                                                                                                                                                                                                                                                                                              |        |         |      |          |          |
|-----|---|-----------|-------------|-----------|----------------------------------------------------------------------------------------------------------------------------------------------------------------------------------------------------------------------------------------------------------------------------------------------------------------------------------------------------------------------------------------------------------------------------------------------------------------------------------------------------------------------------------------------------------------------------------------------------------------------------------------------------------------------------------------------|--------|---------|------|----------|----------|
| 550 | 2 | L4 vs. M4 | 254200_at   | AT4G24110 | NADP-specific glutamate dehydrogenase;(source:Araport11)                                                                                                                                                                                                                                                                                                                                                                                                                                                                                                                                                                                                                                     | 58.22  | 96.37   | 0.60 | 5.88E-04 | 1.09E-03 |
| 551 | 2 | L4 vs. M4 | 260410_at   | AT1G69870 | Encodes a low affinity nitrate transporter NRT1.7. Expressed in phloem. Responsible for source-to-sink remobilization of nitrate. The mRNA is cell-to-cell mobile.                                                                                                                                                                                                                                                                                                                                                                                                                                                                                                                           | 18.92  | 31.88   | 0.59 | 6.51E-04 | 1.17E-03 |
| 552 | 2 | L4 vs. M4 | 263881_at   | AT2G21820 | seed maturation protein;(source:Araport11)                                                                                                                                                                                                                                                                                                                                                                                                                                                                                                                                                                                                                                                   | 51.13  | 87.30   | 0.59 | 3.40E-04 | 6.84E-04 |
| 553 | 2 | L4 vs. M4 | 256900_at   | AT3G24670 | Pectin lyase-like superfamily protein;(source:Araport11)                                                                                                                                                                                                                                                                                                                                                                                                                                                                                                                                                                                                                                     | 33.93  | 57.82   | 0.59 | 2.19E-04 | 4.88E-04 |
| 554 | 2 | L4 vs. M4 | 253362_s_at | AT4G33120 | S-adenosyl-L-methionine-dependent methyltransferases superfamily protein;(source:Araport11)                                                                                                                                                                                                                                                                                                                                                                                                                                                                                                                                                                                                  | 44.21  | 75.30   | 0.59 | 2.36E-04 | 5.16E-04 |
| 555 | 2 | L4 vs. M4 | 253341_at   | AT4G33410 | SIGNAL PEPTIDE PEPTIDASE-LIKE 1;(source:Araport11)<br>Encodes a protein with similarity to glutathione synthetases, which catalyzes one of the early steps in glutathione biosynthesis. Two transcripts have been detected; the longer transcript is less abundant and the protein is localized to the chloroplast. The smaller transcript, in which the transit peptide is truncated, is localized to the cytosol. Increased glutathione accumulation in response to cesium stress.<br>UV damage and heat induce a common stress response in plants that leads to tissue death and reduced chloroplast function. The UVH6 product is suggested to be a negative regulator of this response. | 185.15 | 311.58  | 0.59 | 6.24E-04 | 1.14E-03 |
| 556 | 2 | L4 vs. M4 | 246785_at   | AT5G27380 |                                                                                                                                                                                                                                                                                                                                                                                                                                                                                                                                                                                                                                                                                              | 28.38  | 48.10   | 0.59 | 8.30E-04 | 1.44E-03 |
| 557 | 2 | L4 vs. M4 | 264356_at   | AT1G03190 |                                                                                                                                                                                                                                                                                                                                                                                                                                                                                                                                                                                                                                                                                              | 42.69  | 73.72   | 0.58 | 6.42E-04 | 1.16E-03 |
| 558 | 2 | L4 vs. M4 | 261689_at   | AT1G50140 | P-loop containing nucleoside triphosphate hydrolases superfamily protein;(source:Araport11)                                                                                                                                                                                                                                                                                                                                                                                                                                                                                                                                                                                                  | 143.97 | 247.25  | 0.58 | 6.39E-04 | 1.16E-03 |
| 559 | 2 | L4 vs. M4 | 245188_at   | AT1G67660 | Restriction endonuclease, type II-like superfamily protein;(source:Araport11)                                                                                                                                                                                                                                                                                                                                                                                                                                                                                                                                                                                                                | 101.47 | 173.98  | 0.58 | 2.00E-04 | 4.56E-04 |
| 560 | 2 | L4 vs. M4 | 265375_at   | AT2G06530 | SNF7 family protein;(source:Araport11)                                                                                                                                                                                                                                                                                                                                                                                                                                                                                                                                                                                                                                                       | 66.82  | 115.94  | 0.58 | 8.56E-04 | 1.49E-03 |
| 561 | 2 | L4 vs. M4 | 266864_at   | AT2G26800 | Mutant has increased seed ile, leu and val as well as his and arg.<br>Encodes BOP1, an ortholog of Block of cell proliferation (BOP) protein. A T-DNA null allele of the BOP1 gene is lethal, and a 50% decrease in transcript accumulation is sufficient to cause severe developmental defects linked to defective cell division.                                                                                                                                                                                                                                                                                                                                                           | 186.49 | 323.54  | 0.58 | 3.26E-04 | 6.62E-04 |
| 562 | 2 | L4 vs. M4 | 263824_at   | AT2G40360 | hypothetical protein (DUF868);(source:Araport11)                                                                                                                                                                                                                                                                                                                                                                                                                                                                                                                                                                                                                                             | 158.53 | 274.12  | 0.58 | 6.09E-04 | 1.12E-03 |
| 563 | 2 | L4 vs. M4 | 250398_at   | AT5G11000 | Encodes the 49KDa plastid NAD(P)H dehydrogenase subunit H protein. Its transcription is regulated by an ndhF-specific plastid sigma factor, SIG4.                                                                                                                                                                                                                                                                                                                                                                                                                                                                                                                                            | 49.76  | 85.83   | 0.58 | 8.80E-04 | 1.52E-03 |
| 564 | 2 | L4 vs. M4 | 244938_at   | ATCG01110 | Encodes the Arabidopsis homolog of a conserved eukaryotic protein without known functional domains. The protein that localizes to nuclear speckles and colocalizes with known splicing proteins.                                                                                                                                                                                                                                                                                                                                                                                                                                                                                             | 55.08  | 94.30   | 0.58 | 6.34E-04 | 1.15E-03 |
| 565 | 2 | L4 vs. M4 | 265092_at   | AT1G03910 |                                                                                                                                                                                                                                                                                                                                                                                                                                                                                                                                                                                                                                                                                              | 190.63 | 334.78  | 0.57 | 2.56E-04 | 5.49E-04 |
| 566 | 2 | L4 vs. M4 | 261164_at   | AT1G34470 | magnesium transporter, putative (DUF803);(source:Araport11)<br>encodes a cytosolic thioredoxin that reduces disulfide bridges of target proteins by the reversible formation of a disulfide bridge between two neighboring Cys residues present in the active site. Thioredoxins have been found to regulate a variety of biological reactions in prokaryotic and eukaryotic cells.                                                                                                                                                                                                                                                                                                          | 51.60  | 91.02   | 0.57 | 2.59E-04 | 5.53E-04 |
| 567 | 2 | L4 vs. M4 | 260943_at   | AT1G45145 | Saposin-like aspartyl protease family protein;(source:Araport11)                                                                                                                                                                                                                                                                                                                                                                                                                                                                                                                                                                                                                             | 36.51  | 63.91   | 0.57 | 1.67E-04 | 4.01E-04 |
| 568 | 2 | L4 vs. M4 | 264741_at   | AT1G62290 | Encodes a putative beta-carbonic anhydrase betaCA4. Together with betaCA1 (At3g01500) regulates CO2-controlled stomatal movements in guard cells, as well as attenuates immunity. Differential CA gene expression in response to changing atmospheric CO2 conditions contribute to altered disease resistance levels.                                                                                                                                                                                                                                                                                                                                                                        | 52.54  | 92.94   | 0.57 | 1.38E-04 | 3.43E-04 |
| 569 | 2 | L4 vs. M4 | 264313_at   | AT1G70410 | encodes cytosolic GADPH (C subunit) involved in the glycolytic pathway but also interacts with H2O2 potentially placing it in a signalling cascade induced by ROS. The mRNA is cell-to-cell mobile.                                                                                                                                                                                                                                                                                                                                                                                                                                                                                          | 155.07 | 271.62  | 0.57 | 2.29E-04 | 5.04E-04 |
| 570 | 2 | L4 vs. M4 | 257703_s_at | AT3G04120 | RNA binding (RRM/RBD/RNP motifs) family protein;(source:Araport11)                                                                                                                                                                                                                                                                                                                                                                                                                                                                                                                                                                                                                           | 672.84 | 1190.39 | 0.57 | 3.24E-04 | 6.62E-04 |
| 571 | 2 | L4 vs. M4 | 257703_at   | AT3G12640 | Encodes a CBL (calcineurin B-like calcium sensor proteins) -interacting serine/threonine protein kinase. Regulates the low-affinity phase of the primary nitrate response. The mRNA is cell-to-cell mobile.                                                                                                                                                                                                                                                                                                                                                                                                                                                                                  | 91.24  | 159.49  | 0.57 | 3.40E-04 | 6.84E-04 |
| 572 | 2 | L4 vs. M4 | 254167_at   | AT4G24400 |                                                                                                                                                                                                                                                                                                                                                                                                                                                                                                                                                                                                                                                                                              | 86.90  | 151.74  | 0.57 | 7.80E-04 | 1.37E-03 |
| 573 | 2 | L4 vs. M4 | 245913_at   | AT5G19860 | transmembrane protein, putative (Protein of unknown function, DUF538);(source:Araport11)<br>Involved in golgi protein trafficking. AtARL1 binds directly to the GRIP domain of AtGRIP in a GTP-dependent manner. Localized to the golgi apparatus, tyrosine 717 in AtGRIP is crucial for Golgi localization.                                                                                                                                                                                                                                                                                                                                                                                 | 103.75 | 181.24  | 0.57 | 7.14E-04 | 1.26E-03 |
| 574 | 2 | L4 vs. M4 | 247082_at   | AT5G66030 | Pectin lyase-like superfamily protein;(source:Araport11)                                                                                                                                                                                                                                                                                                                                                                                                                                                                                                                                                                                                                                     | 96.74  | 171.13  | 0.57 | 2.35E-04 | 5.16E-04 |
| 575 | 2 | L4 vs. M4 | 256038_at   | AT1G19170 | hypothetical protein;(source:Araport11)                                                                                                                                                                                                                                                                                                                                                                                                                                                                                                                                                                                                                                                      | 25.48  | 45.11   | 0.56 | 2.52E-04 | 5.45E-04 |
| 576 | 2 | L4 vs. M4 | 260715_at   | AT1G48200 | cytochrome P450, family 76, subfamily C, polypeptide 3;(source:Araport11)                                                                                                                                                                                                                                                                                                                                                                                                                                                                                                                                                                                                                    | 34.24  | 61.33   | 0.56 | 5.35E-04 | 1.00E-03 |
| 577 | 2 | L4 vs. M4 | 267560_at   | AT2G45580 |                                                                                                                                                                                                                                                                                                                                                                                                                                                                                                                                                                                                                                                                                              | 49.64  | 88.86   | 0.56 | 4.80E-04 | 9.06E-04 |

|     |   |           |            |           |                                                                                                                                                                                                                                                                                                                                                                                                                                                                                                                                                                                                                                                                                                                                                                           |        |         |      |          |          |
|-----|---|-----------|------------|-----------|---------------------------------------------------------------------------------------------------------------------------------------------------------------------------------------------------------------------------------------------------------------------------------------------------------------------------------------------------------------------------------------------------------------------------------------------------------------------------------------------------------------------------------------------------------------------------------------------------------------------------------------------------------------------------------------------------------------------------------------------------------------------------|--------|---------|------|----------|----------|
| 578 | 2 | L4 vs. M4 | 258774_at  | AT3G10740 | Encodes a bifunctional alpha-l-arabinofuranosidase/beta-d-xylosidase that belongs to family 51 of glycoside hydrolases. It may be involved in cell wall modification.                                                                                                                                                                                                                                                                                                                                                                                                                                                                                                                                                                                                     | 160.97 | 287.34  | 0.56 | 2.19E-04 | 4.88E-04 |
| 579 | 2 | L4 vs. M4 | 258207_at  | AT3G14050 | RELA/SPOT homolog 2;(source:Araport11)                                                                                                                                                                                                                                                                                                                                                                                                                                                                                                                                                                                                                                                                                                                                    | 480.64 | 863.53  | 0.56 | 8.25E-05 | 2.23E-04 |
| 580 | 2 | L4 vs. M4 | 258416_at  | AT3G17310 | Encodes DRM3 (Domains Rearranged Methyltransferase3), a catalytically mutated paralog of the cytosine methyltransferase DRM2. Despite being catalytically mutated, DRM3 is required for normal maintenance of non-CG DNA methylation, establishment of RNA-directed DNA methylation triggered by repeat sequences and accumulation of repeat-associated small RNAs.                                                                                                                                                                                                                                                                                                                                                                                                       | 32.28  | 58.04   | 0.56 | 1.08E-04 | 2.82E-04 |
| 581 | 2 | L4 vs. M4 | 251668_at  | AT3G57010 | Calcium-dependent phosphotriesterase superfamily protein;(source:Araport11)                                                                                                                                                                                                                                                                                                                                                                                                                                                                                                                                                                                                                                                                                               | 112.39 | 199.07  | 0.56 | 2.50E-04 | 5.43E-04 |
| 582 | 2 | L4 vs. M4 | 246201_at  | AT4G36750 | Quinone reductase family protein;(source:Araport11)                                                                                                                                                                                                                                                                                                                                                                                                                                                                                                                                                                                                                                                                                                                       | 43.51  | 77.67   | 0.56 | 3.18E-04 | 6.52E-04 |
| 583 | 2 | L4 vs. M4 | 246253_at  | AT4G37260 | Member of the R2R3 factor gene family. The mRNA is cell-to-cell mobile.                                                                                                                                                                                                                                                                                                                                                                                                                                                                                                                                                                                                                                                                                                   | 162.30 | 288.08  | 0.56 | 2.44E-04 | 5.32E-04 |
| 584 | 2 | L4 vs. M4 | 246055_at  | AT5G08380 | alpha-galactosidase 1;(source:Araport11)                                                                                                                                                                                                                                                                                                                                                                                                                                                                                                                                                                                                                                                                                                                                  | 212.87 | 383.53  | 0.56 | 2.99E-04 | 6.24E-04 |
| 585 | 2 | L4 vs. M4 | 250527_at  | AT5G08590 | Encodes a member of SNF1-related protein kinases (SnRK2) whose activity is activated by ionic (salt) and non-ionic (mannitol) osmotic stress. Similar to the calcium/calmodulin-dependent protein kinase subfamily and the SNF1 kinase subfamily.                                                                                                                                                                                                                                                                                                                                                                                                                                                                                                                         | 127.92 | 230.11  | 0.56 | 1.24E-04 | 3.12E-04 |
| 586 | 2 | L4 vs. M4 | 246447_at  | AT5G16780 | Encodes a protein belonging to SART-1 family. The gene is expressed in the basal region of the developing embryo during heart stage. Phenotypic analyses of dot2 mutants suggest that this protein plays a role in root, shoot, and flower development. dot2 mutants are dwarfed plants that display an aberrant spurred leaf venation pattern and fail to flower.<br>Encodes a mitochondrial half-molecule ABC transporter, a member of ATM subfamily. Mutants are dwarfed, chlorotic plants with altered leaf morphology. ATM3 transcription is induced by Cd(II) or Pb(II). Involved in heavy metal resistance. Arabidopsis thaliana has three ATM genes, namely ATM1, ATM2 and ATM3. Only ATM3 has an important function for plant growth. Role in Moco biosynthesis. | 77.11  | 138.61  | 0.56 | 9.44E-04 | 1.61E-03 |
| 587 | 2 | L4 vs. M4 | 247806_at  | AT5G58270 | Encodes a glycine-rich RNA binding protein that is involved in C-> U RNA editing in mitochondria.                                                                                                                                                                                                                                                                                                                                                                                                                                                                                                                                                                                                                                                                         | 93.07  | 166.37  | 0.56 | 4.89E-04 | 9.20E-04 |
| 588 | 2 | L4 vs. M4 | 247575_at  | AT5G61030 | Gene expression is induced by cold. The mRNA is cell-to-cell mobile.                                                                                                                                                                                                                                                                                                                                                                                                                                                                                                                                                                                                                                                                                                      | 180.68 | 324.37  | 0.56 | 4.77E-04 | 9.02E-04 |
| 589 | 2 | L4 vs. M4 | 259391_s_a | AT1G06350 | Fatty acid desaturase family protein;(source:Araport11)                                                                                                                                                                                                                                                                                                                                                                                                                                                                                                                                                                                                                                                                                                                   | 75.17  | 136.01  | 0.55 | 7.79E-05 | 2.14E-04 |
| 590 | 2 | L4 vs. M4 | 256061_at  | AT1G07040 | plant/protein;(source:Araport11)                                                                                                                                                                                                                                                                                                                                                                                                                                                                                                                                                                                                                                                                                                                                          | 71.58  | 130.32  | 0.55 | 2.85E-04 | 6.02E-04 |
| 591 | 2 | L4 vs. M4 | 261424_at  | AT1G18700 | DNAJ heat shock N-terminal domain-containing protein;(source:Araport11)                                                                                                                                                                                                                                                                                                                                                                                                                                                                                                                                                                                                                                                                                                   | 20.07  | 36.34   | 0.55 | 9.27E-04 | 1.59E-03 |
| 592 | 2 | L4 vs. M4 | 259632_at  | AT1G56430 | Encodes a protein with nicotianamine synthase activity.                                                                                                                                                                                                                                                                                                                                                                                                                                                                                                                                                                                                                                                                                                                   | 36.10  | 65.24   | 0.55 | 2.36E-04 | 5.16E-04 |
| 593 | 2 | L4 vs. M4 | 266098_at  | AT2G37870 | Bifunctional inhibitor/lipid-transfer protein/seed storage 2S albumin superfamily protein;(source:Araport11)                                                                                                                                                                                                                                                                                                                                                                                                                                                                                                                                                                                                                                                              | 260.25 | 469.23  | 0.55 | 1.40E-04 | 3.45E-04 |
| 594 | 2 | L4 vs. M4 | 258270_at  | AT3G15650 | alpha/beta-Hydrolases superfamily protein;(source:Araport11)                                                                                                                                                                                                                                                                                                                                                                                                                                                                                                                                                                                                                                                                                                              | 61.82  | 112.34  | 0.55 | 1.80E-04 | 4.24E-04 |
| 595 | 2 | L4 vs. M4 | 251948_at  | AT3G53580 | diaminopimelate epimerase family protein;(source:Araport11)                                                                                                                                                                                                                                                                                                                                                                                                                                                                                                                                                                                                                                                                                                               | 686.58 | 1240.35 | 0.55 | 3.26E-04 | 6.62E-04 |
| 596 | 2 | L4 vs. M4 | 251721_s_a | AT3G56190 | Encodes one of two alpha-SNAPs (soluble NSF attachment protein) in Arabidopsis NKS1, a plant-specific gene, encodes a 19 kDa endomembrane-localized protein. It is part of SOS independent ion homeostasis regulation pathway.                                                                                                                                                                                                                                                                                                                                                                                                                                                                                                                                            | 145.36 | 264.19  | 0.55 | 1.55E-04 | 3.75E-04 |
| 597 | 2 | L4 vs. M4 | 253551_at  | AT4G30996 | Regulates flowering time and displays a redundant role in pollen tube growth together with AtU2AF65b.                                                                                                                                                                                                                                                                                                                                                                                                                                                                                                                                                                                                                                                                     | 373.53 | 683.76  | 0.55 | 3.41E-04 | 6.85E-04 |
| 598 | 2 | L4 vs. M4 | 246257_at  | AT4G36690 | Homologous to the RAF family of serine/threonine protein kinases. Negative regulator in the ethylene signal transduction pathway. Interacts with the putative ethylene receptors ETR1 and ERS.                                                                                                                                                                                                                                                                                                                                                                                                                                                                                                                                                                            | 259.24 | 468.33  | 0.55 | 7.35E-05 | 2.07E-04 |
| 599 | 2 | L4 vs. M4 | 250911_at  | AT5G03730 | Constitutively expressed.                                                                                                                                                                                                                                                                                                                                                                                                                                                                                                                                                                                                                                                                                                                                                 | 62.82  | 114.23  | 0.55 | 1.07E-04 | 2.81E-04 |
| 600 | 2 | L4 vs. M4 | 245904_at  | AT5G11110 | Encodes a protein with putative sucrose-phosphate synthase activity. Involved in pollen exine formation.                                                                                                                                                                                                                                                                                                                                                                                                                                                                                                                                                                                                                                                                  | 67.73  | 122.73  | 0.55 | 7.04E-04 | 1.25E-03 |
| 601 | 2 | L4 vs. M4 | 246499_at  | AT5G16260 | Encodes a RNA binding protein ELF9 (EARLY FLOWERING9). Loss of ELF9 function in the Wassilewskija ecotype causes early flowering in short days. ELF9 reduces SOC1 (SUPPRESSOR OF OVEREXPRESSION OF CO1) transcript levels, possibly via nonsense-mediated mRNA decay.                                                                                                                                                                                                                                                                                                                                                                                                                                                                                                     | 76.74  | 139.34  | 0.55 | 9.30E-05 | 2.50E-04 |
| 602 | 2 | L4 vs. M4 | 246733_at  | AT5G27660 | The mRNA is cell-to-cell mobile.<br>Encodes a protein with similarity to human PARK13, a mitochondrial protease implicated in Parkinson disease. DEG14 is induced by heat stress and involved in degradation of misfolded proteins.                                                                                                                                                                                                                                                                                                                                                                                                                                                                                                                                       | 78.55  | 143.74  | 0.55 | 2.15E-04 | 4.81E-04 |
| 603 | 2 | L4 vs. M4 | 247811_at  | AT5G58430 | A member of EXO70 gene family, putative exocyst subunits, conserved in land plants. Arabidopsis thaliana contains 23 putative EXO70 genes, which can be classified into eight clusters on the phylogenetic tree. Targeted by AvrPtoB to manipulate the defense molecule secretion machinery.                                                                                                                                                                                                                                                                                                                                                                                                                                                                              | 31.71  | 57.35   | 0.55 | 5.77E-04 | 1.07E-03 |

|     |   |           |            |           |                                                                                                                                                                                                                                                                                                                                                                                                                                                                                                                                                                                                                                                                                                                                             |         |         |      |          |          |
|-----|---|-----------|------------|-----------|---------------------------------------------------------------------------------------------------------------------------------------------------------------------------------------------------------------------------------------------------------------------------------------------------------------------------------------------------------------------------------------------------------------------------------------------------------------------------------------------------------------------------------------------------------------------------------------------------------------------------------------------------------------------------------------------------------------------------------------------|---------|---------|------|----------|----------|
| 604 | 2 | L4 vs. M4 | 261537_at  | AT1G01800 | NAD(P)-binding Rossmann-fold superfamily protein;(source:Araport11)<br>Encodes AAP1 (amino acid permease 1), a neutral amino acid transporter expressed in seeds. Functions in amino acid uptake into embryos. The transporter also functions in acquisition of glutamate and neutral amino acids by the root.                                                                                                                                                                                                                                                                                                                                                                                                                              | 45.89   | 84.23   | 0.54 | 4.81E-04 | 9.07E-04 |
| 605 | 2 | L4 vs. M4 | 256022_at  | AT1G58360 | STYK serine threonine kinase that phosphorylates several oil body proteins including OLE1 and CLO4/CAL4.                                                                                                                                                                                                                                                                                                                                                                                                                                                                                                                                                                                                                                    | 392.79  | 723.23  | 0.54 | 9.79E-05 | 2.61E-04 |
| 606 | 2 | L4 vs. M4 | 265661_at  | AT2G24360 | Encodes a component of the thylakoid-localized Sec system involved in the translocation of cytoplasmic proteins into plastid. Loss-of-function mutations result in arrest at the globular stage and embryo lethality.                                                                                                                                                                                                                                                                                                                                                                                                                                                                                                                       | 84.93   | 158.26  | 0.54 | 1.03E-04 | 2.73E-04 |
| 607 | 2 | L4 vs. M4 | 263425_at  | AT2G31530 | Histone superfamily protein;(source:Araport11)                                                                                                                                                                                                                                                                                                                                                                                                                                                                                                                                                                                                                                                                                              | 76.68   | 140.71  | 0.54 | 1.72E-04 | 4.09E-04 |
| 608 | 2 | L4 vs. M4 | 251924_at  | AT3G53730 |                                                                                                                                                                                                                                                                                                                                                                                                                                                                                                                                                                                                                                                                                                                                             | 345.72  | 640.92  | 0.54 | 7.90E-05 | 2.16E-04 |
| 609 | 2 | L4 vs. M4 | 251431_at  | AT3G60240 | protein synthesis initiation factor 4G (EIF4G). A mutation in this gene (cum2-1) results in decreased accumulation of CMV coat protein in upper, uninoculated leaves. Likely affects cell-to-cell movement of the virus, also affects TCV multiplication.                                                                                                                                                                                                                                                                                                                                                                                                                                                                                   | 574.52  | 1058.97 | 0.54 | 7.47E-05 | 2.09E-04 |
| 610 | 2 | L4 vs. M4 | 254080_at  | AT4G25630 | encodes a fibrillarin, a key nucleolar protein in eukaryotes which associates with box C/D small nucleolar RNAs (snoRNAs) directing 2'-O-ribose methylation of the rRNA. This gene also encodes a novel box C/D snoRNA, U60.2f in its fifth intron that accumulates in seedlings and that their targeted residue on the 25 S rRNA is methylated. The mRNA is cell-to-cell mobile.                                                                                                                                                                                                                                                                                                                                                           | 384.65  | 710.45  | 0.54 | 1.19E-04 | 3.05E-04 |
| 611 | 2 | L4 vs. M4 | 253755_at  | AT4G29040 | RPT2a encodes the 26S proteasome subunit. It is required for root meristem maintenance, and regulates gametogenesis. RPT2a is also shown to regulate gene silencing via DNA methylation.                                                                                                                                                                                                                                                                                                                                                                                                                                                                                                                                                    | 579.63  | 1078.79 | 0.54 | 7.16E-05 | 2.04E-04 |
| 612 | 2 | L4 vs. M4 | 253083_at  | AT4G36250 | Encodes a putative aldehyde dehydrogenase. The gene is not responsive to osmotic stress and is expressed constitutively at a low level in plantlets and root cultures.                                                                                                                                                                                                                                                                                                                                                                                                                                                                                                                                                                      | 455.81  | 846.87  | 0.54 | 1.09E-04 | 2.82E-04 |
| 613 | 2 | L4 vs. M4 | 250793_at  | AT5G05600 | Encodes a protein with similarity to flavonol synthases that is involved in the detoxification polycyclic aromatic hydrocarbons. One of 4 paralogs encoding a 2-oxoglutarate/Fe(II)-dependent oxygenases that hydroxylates JA to 12-OH-JA.                                                                                                                                                                                                                                                                                                                                                                                                                                                                                                  | 234.13  | 429.62  | 0.54 | 7.76E-05 | 2.14E-04 |
| 614 | 2 | L4 vs. M4 | 250094_at  | AT5G17380 | Thiamine pyrophosphate dependent pyruvate decarboxylase family protein;(source:Araport11)                                                                                                                                                                                                                                                                                                                                                                                                                                                                                                                                                                                                                                                   | 291.34  | 540.93  | 0.54 | 2.29E-04 | 5.04E-04 |
| 615 | 2 | L4 vs. M4 | 253898_s_a | AT5G54810 | A.thaliana tryptophan synthase beta subunit (trpB)                                                                                                                                                                                                                                                                                                                                                                                                                                                                                                                                                                                                                                                                                          | 1611.07 | 2991.81 | 0.54 | 7.51E-05 | 2.10E-04 |
| 616 | 2 | L4 vs. M4 | 247077_at  | AT5G66420 | TIM-barrel signal transduction protein;(source:Araport11)                                                                                                                                                                                                                                                                                                                                                                                                                                                                                                                                                                                                                                                                                   | 131.64  | 242.66  | 0.54 | 9.35E-05 | 2.51E-04 |
| 617 | 2 | L4 vs. M4 | 262105_at  | AT1G02810 | Plant invertase/pectin methylesterase inhibitor superfamily;(source:Araport11)                                                                                                                                                                                                                                                                                                                                                                                                                                                                                                                                                                                                                                                              | 38.28   | 72.34   | 0.53 | 5.02E-05 | 1.54E-04 |
| 618 | 2 | L4 vs. M4 | 263183_at  | AT1G05570 | Encodes a callose synthase 1 catalytic subunit. Member of Glycosyltransferase Family- 48.                                                                                                                                                                                                                                                                                                                                                                                                                                                                                                                                                                                                                                                   | 667.49  | 1249.36 | 0.53 | 5.70E-05 | 1.69E-04 |
| 619 | 2 | L4 vs. M4 | 264992_at  | AT1G67300 | Major facilitator superfamily protein;(source:Araport11)                                                                                                                                                                                                                                                                                                                                                                                                                                                                                                                                                                                                                                                                                    | 76.45   | 144.30  | 0.53 | 1.85E-04 | 4.33E-04 |
| 620 | 2 | L4 vs. M4 | 260445_at  | AT1G68370 | DnaJ-like protein with homology to coiled coils found in cytoskeleton-interacting proteins.                                                                                                                                                                                                                                                                                                                                                                                                                                                                                                                                                                                                                                                 | 23.63   | 44.71   | 0.53 | 6.97E-05 | 2.00E-04 |
| 621 | 2 | L4 vs. M4 | 257715_at  | AT3G12750 | A member of Zrt- and Irt-related protein (ZIP) family. transcript is induced in response to zinc deficiency in the root.                                                                                                                                                                                                                                                                                                                                                                                                                                                                                                                                                                                                                    | 22.13   | 41.49   | 0.53 | 2.76E-04 | 5.85E-04 |
| 622 | 2 | L4 vs. M4 | 252277_at  | AT3G49470 | nascent polypeptide-associated complex subunit alpha-like protein 2;(source:Araport11)                                                                                                                                                                                                                                                                                                                                                                                                                                                                                                                                                                                                                                                      | 69.17   | 130.25  | 0.53 | 3.50E-05 | 1.17E-04 |
| 623 | 2 | L4 vs. M4 | 245007_at  | ATCG00350 | Encodes psaA protein comprising the reaction center for photosystem I along with psaB protein; hydrophobic protein encoded by the chloroplast genome.                                                                                                                                                                                                                                                                                                                                                                                                                                                                                                                                                                                       | 43.31   | 81.46   | 0.53 | 6.36E-04 | 1.16E-03 |
| 624 | 2 | L4 vs. M4 | 263184_at  | AT1G05560 | A UDP-glucose transferase localized in the phragmoplast. It has been co-purified with the callose synthase complex and may transfer UDP-glucose from sucrose synthase to the callose synthase and thus help form a substrate channel for the synthesis of callose at the forming cell plate. Induced by salicylic acid. Independent of NPR1 for their induction by salicylic acid. UGT1 encodes a protein with glucosyltransferase activity with high sequence homology to UGT2 (AT1G05530). It belongs to an UGT subfamily that binds UDP-glucose but not UDP-glucuronate, UDP-galactose, or UDP-rhamnose as the glycosyl donor. UGT1 was shown to be able to use abscisic acid as glycosylation substrate in the presence of UDP-glucose. | 17.76   | 33.91   | 0.52 | 3.63E-05 | 1.20E-04 |
| 625 | 2 | L4 vs. M4 | 261150_at  | AT1G19640 | Encodes a S-adenosyl-L-methionine:jasmonic acid carboxyl methyltransferase that catalyzes the formation of methyljasmonate from jasmonic acid. Its expression is induced in response to wounding or methyljasmonate treatment.                                                                                                                                                                                                                                                                                                                                                                                                                                                                                                              | 21.07   | 40.40   | 0.52 | 3.79E-05 | 1.23E-04 |

|     |   |           |            |           |                                                                                                                                                                                                                                                                                                                                                                                                                                                                                                                                                                                                                                                                                                                                                                |        |        |      |          |          |
|-----|---|-----------|------------|-----------|----------------------------------------------------------------------------------------------------------------------------------------------------------------------------------------------------------------------------------------------------------------------------------------------------------------------------------------------------------------------------------------------------------------------------------------------------------------------------------------------------------------------------------------------------------------------------------------------------------------------------------------------------------------------------------------------------------------------------------------------------------------|--------|--------|------|----------|----------|
| 626 | 2 | L4 vs. M4 | 262744_at  | AT1G28680 | Catalyses trans-cis isomerization and lactonization in the biosynthesis of coumarins in roots.                                                                                                                                                                                                                                                                                                                                                                                                                                                                                                                                                                                                                                                                 | 67.91  | 129.70 | 0.52 | 3.61E-05 | 1.20E-04 |
| 627 | 2 | L4 vs. M4 | 260232_at  | AT1G74640 | alpha/beta-Hydrolases superfamily protein;(source:Araport11)                                                                                                                                                                                                                                                                                                                                                                                                                                                                                                                                                                                                                                                                                                   | 66.16  | 127.90 | 0.52 | 1.56E-04 | 3.77E-04 |
| 628 | 2 | L4 vs. M4 | 261881_at  | AT1G80760 | Encodes a protein with boron transporter activity. It helps to preferentially direct boron to young developing tissues in the shoot, such as immature leaves, under low boron conditions. This boron channel appears to be impermeable to water, unlike the closely related NIP5;1 boron transporter. This protein also allows the transport of glycerol, urea, and formimide but not larger uncharged solutes such as arabinol and sucrose when it is expressed heterologously.                                                                                                                                                                                                                                                                               | 41.81  | 80.98  | 0.52 | 5.36E-04 | 1.00E-03 |
| 629 | 2 | L4 vs. M4 | 266732_at  | AT2G03240 | EXS (ERD1/XPR1/SYG1) family protein;(source:Araport11)                                                                                                                                                                                                                                                                                                                                                                                                                                                                                                                                                                                                                                                                                                         | 57.58  | 110.52 | 0.52 | 5.47E-04 | 1.02E-03 |
| 630 | 2 | L4 vs. M4 | 263807_at  | AT2G04400 | Acts during tryptophan biosynthesis controlled by ERF109.                                                                                                                                                                                                                                                                                                                                                                                                                                                                                                                                                                                                                                                                                                      | 287.26 | 550.95 | 0.52 | 3.84E-04 | 7.48E-04 |
| 631 | 2 | L4 vs. M4 | 265938_at  | AT2G19620 | Plays a role in dehydration stress response.                                                                                                                                                                                                                                                                                                                                                                                                                                                                                                                                                                                                                                                                                                                   | 77.97  | 149.82 | 0.52 | 2.47E-05 | 9.15E-05 |
| 632 | 2 | L4 vs. M4 | 264002_at  | AT2G22360 | DNAJ heat shock family protein;(source:Araport11)                                                                                                                                                                                                                                                                                                                                                                                                                                                                                                                                                                                                                                                                                                              | 26.55  | 50.75  | 0.52 | 4.50E-04 | 8.57E-04 |
| 633 | 2 | L4 vs. M4 | 265911_at  | AT2G25670 | hypothetical protein;(source:Araport11)                                                                                                                                                                                                                                                                                                                                                                                                                                                                                                                                                                                                                                                                                                                        | 227.59 | 441.38 | 0.52 | 1.80E-04 | 4.24E-04 |
| 634 | 2 | L4 vs. M4 | 263986_at  | AT2G42790 | Encodes a peroxisomal citrate synthase that is expressed throughout seedling and shoot development.                                                                                                                                                                                                                                                                                                                                                                                                                                                                                                                                                                                                                                                            | 307.40 | 592.92 | 0.52 | 2.77E-05 | 9.92E-05 |
| 635 | 2 | L4 vs. M4 | 266749_at  | AT2G47060 | Encodes Pto-interacting 1-4 (PTI1-4), a member of the PTI1-like serine/threonine protein kinases that share strong sequence identity to the tomato PTI1 kinase.                                                                                                                                                                                                                                                                                                                                                                                                                                                                                                                                                                                                | 34.74  | 66.18  | 0.52 | 1.69E-04 | 4.04E-04 |
| 636 | 2 | L4 vs. M4 | 258485_at  | AT3G02630 | One of seven acyl carrier proteins. Expressed primarily in developing seeds. Involved in fatty acid metabolism.                                                                                                                                                                                                                                                                                                                                                                                                                                                                                                                                                                                                                                                | 135.84 | 261.73 | 0.52 | 3.56E-05 | 1.19E-04 |
| 637 | 2 | L4 vs. M4 | 258679_at  | AT3G08590 | Encodes a 2,3-biphosphoglycerate-independent phosphoglycerate mutase that is involved in pollen development and stomatal movement.                                                                                                                                                                                                                                                                                                                                                                                                                                                                                                                                                                                                                             | 325.13 | 620.20 | 0.52 | 4.28E-05 | 1.36E-04 |
| 638 | 2 | L4 vs. M4 | 257781_at  | AT3G27120 | Encodes a conserved AAA-ATPase that acts as a negative regulator of meiotic CO formation.                                                                                                                                                                                                                                                                                                                                                                                                                                                                                                                                                                                                                                                                      | 22.50  | 43.10  | 0.52 | 2.00E-04 | 4.55E-04 |
| 639 | 2 | L4 vs. M4 | 246307_at  | AT3G51800 | putative nuclear DNA-binding protein G2p (AtG2) mRNA,                                                                                                                                                                                                                                                                                                                                                                                                                                                                                                                                                                                                                                                                                                          | 204.56 | 392.33 | 0.52 | 7.58E-05 | 2.11E-04 |
| 640 | 2 | L4 vs. M4 | 251221_at  | AT3G62550 | Adenine nucleotide alpha hydrolases-like superfamily protein;(source:Araport11)                                                                                                                                                                                                                                                                                                                                                                                                                                                                                                                                                                                                                                                                                | 58.92  | 112.64 | 0.52 | 2.77E-05 | 9.92E-05 |
| 641 | 2 | L4 vs. M4 | 254915_s_a | AT4G11310 | cysteine proteinase precursor-like protein                                                                                                                                                                                                                                                                                                                                                                                                                                                                                                                                                                                                                                                                                                                     | 59.62  | 115.59 | 0.52 | 4.06E-04 | 7.82E-04 |
| 642 | 2 | L4 vs. M4 | 254020_at  | AT4G25700 | Converts beta-carotene to zeaxanthin via cryptoxanthin.                                                                                                                                                                                                                                                                                                                                                                                                                                                                                                                                                                                                                                                                                                        | 128.91 | 247.29 | 0.52 | 4.42E-05 | 1.40E-04 |
| 643 | 2 | L4 vs. M4 | 246050_s_a | AT5G28900 | Calcium-binding EF-hand family protein;(source:Araport11)                                                                                                                                                                                                                                                                                                                                                                                                                                                                                                                                                                                                                                                                                                      | 49.02  | 94.46  | 0.52 | 1.97E-05 | 7.67E-05 |
| 644 | 2 | L4 vs. M4 | 249513_at  | AT5G38460 | ALG6, ALG8 glycosyltransferase family;(source:Araport11)                                                                                                                                                                                                                                                                                                                                                                                                                                                                                                                                                                                                                                                                                                       | 31.58  | 60.50  | 0.52 | 1.65E-04 | 3.98E-04 |
| 645 | 2 | L4 vs. M4 | 249211_at  | AT5G42680 | MIZU-KUSSEI-like protein (Protein of unknown function, DUF617);(source:Araport11)                                                                                                                                                                                                                                                                                                                                                                                                                                                                                                                                                                                                                                                                              | 55.54  | 107.24 | 0.52 | 5.36E-05 | 1.62E-04 |
| 646 | 2 | L4 vs. M4 | 248747_at  | AT5G47930 | Zinc-binding ribosomal protein family protein;(source:Araport11)                                                                                                                                                                                                                                                                                                                                                                                                                                                                                                                                                                                                                                                                                               | 39.57  | 75.98  | 0.52 | 4.02E-05 | 1.30E-04 |
| 647 | 2 | L4 vs. M4 | 248499_at  | AT5G50400 | purple acid phosphatase 27;(source:Araport11)                                                                                                                                                                                                                                                                                                                                                                                                                                                                                                                                                                                                                                                                                                                  | 44.23  | 84.96  | 0.52 | 1.31E-04 | 3.27E-04 |
| 648 | 2 | L4 vs. M4 | 247261_at  | AT5G64460 | Phosphoglycerate mutase family protein;(source:Araport11)                                                                                                                                                                                                                                                                                                                                                                                                                                                                                                                                                                                                                                                                                                      | 230.91 | 447.80 | 0.52 | 3.72E-05 | 1.23E-04 |
| 649 | 2 | L4 vs. M4 | 244968_at  | ATCG00640 | encodes a chloroplast ribosomal protein L33, a constituent of the large subunit of the ribosomal complex                                                                                                                                                                                                                                                                                                                                                                                                                                                                                                                                                                                                                                                       | 38.74  | 73.86  | 0.52 | 1.24E-04 | 3.12E-04 |
| 650 | 2 | L4 vs. M4 | 261570_at  | AT1G01120 | Encodes a condensing enzyme KCS1 (3-ketoacyl-CoA synthase 1) which is involved in the critical fatty acid elongation process in wax biosynthesis.                                                                                                                                                                                                                                                                                                                                                                                                                                                                                                                                                                                                              | 54.49  | 106.11 | 0.51 | 3.64E-04 | 7.18E-04 |
| 651 | 2 | L4 vs. M4 | 265700_at  | AT2G03470 | ELM2 domain-containing protein;(source:Araport11)                                                                                                                                                                                                                                                                                                                                                                                                                                                                                                                                                                                                                                                                                                              | 21.52  | 42.48  | 0.51 | 4.53E-05 | 1.41E-04 |
| 652 | 2 | L4 vs. M4 | 266849_at  | AT2G25940 | Encodes a vacuolar processing enzyme belonging to a novel group of cysteine proteinases that is expressed in vegetative organs and is upregulated in association with various types of cell death and under stressed conditions.                                                                                                                                                                                                                                                                                                                                                                                                                                                                                                                               | 321.92 | 629.17 | 0.51 | 3.15E-05 | 1.07E-04 |
| 653 | 2 | L4 vs. M4 | 267380_at  | AT2G26170 | Encodes a protein with similarity to thromboxane-A synthase, member of the CYP711A cytochrome P450 family. MAX1 is a specific repressor of vegetative axillary buds generated by the axillary meristem. Expressed in vascular traces in the rosette stem and axillary buds throughout plant development. Mutants have increased axillary branches. Along with MAX3,4 thought to mediate control of shoot branching via synthesis of a signal molecule which is transported over long distance mediated by MAX2. cDNA supports the existence of the longer transcript predicted for this locus, no cDNA isolated for shorter transcript. MAX1 downregulates 11 genes involved in flavonoid pathway (CHS, CHI, F3H, F3'H, FLS, DFR, ANS, UFGT, RT, AAC and GST). | 193.32 | 376.43 | 0.51 | 4.65E-05 | 1.44E-04 |
| 654 | 2 | L4 vs. M4 | 267381_at  | AT2G26190 | IQM4 is a plastid localized, Ca2+ independent calmodulin binding protein that is involved in promoting seed dormancy.                                                                                                                                                                                                                                                                                                                                                                                                                                                                                                                                                                                                                                          | 86.42  | 170.40 | 0.51 | 2.66E-05 | 9.62E-05 |



|     |   |           |                 |           |                                                                                                                                                                                                                                                                                                                                                                                                                                                                                                                                                                                                                                                                                                                                      |         |         |      |          |          |
|-----|---|-----------|-----------------|-----------|--------------------------------------------------------------------------------------------------------------------------------------------------------------------------------------------------------------------------------------------------------------------------------------------------------------------------------------------------------------------------------------------------------------------------------------------------------------------------------------------------------------------------------------------------------------------------------------------------------------------------------------------------------------------------------------------------------------------------------------|---------|---------|------|----------|----------|
| 655 | 2 | L4 vs. M4 | 258697_at       | AT3G09660 | Encodes a minichromosome maintenance protein that is involved with RAD51 in a backup pathway that repairs meiotic double strand breaks without giving meiotic crossovers when the major pathway, which relies on DMC1, fails.                                                                                                                                                                                                                                                                                                                                                                                                                                                                                                        | 34.58   | 68.04   | 0.51 | 2.49E-05 | 9.16E-05 |
| 656 | 2 | L4 vs. M4 | 259383_at       | AT3G16470 | Encodes a JA-responsive gene that coordinates with GRP7 in shaping plant development through the regulation of RNA processing in Arabidopsis. AtJAC1 interacts with RNA binding protein GRP7 specifically in the cytoplasm to regulate its nucleocytoplasmic distribution.                                                                                                                                                                                                                                                                                                                                                                                                                                                           | 60.49   | 119.34  | 0.51 | 2.14E-05 | 8.12E-05 |
| 657 | 2 | L4 vs. M4 | 251929_at       | AT3G53920 | Encodes a sigma-like transcription factor, Sigma 3 (SIG3 or SIGC). As a subunit of chloroplast RNA polymerase, SIG3 confers the ability to recognize promoter sequences on the core enzyme. SIG3 transcribes specifically the psbN gene in plastids.                                                                                                                                                                                                                                                                                                                                                                                                                                                                                 | 25.97   | 51.24   | 0.51 | 9.21E-04 | 1.58E-03 |
| 658 | 2 | L4 vs. M4 | 251594_at       | AT3G57630 | Encodes a glycoprotein glycosyl transferase ExAD. Knockout mutants show truncated root hair phenotype.                                                                                                                                                                                                                                                                                                                                                                                                                                                                                                                                                                                                                               | 146.19  | 289.25  | 0.51 | 2.55E-04 | 5.47E-04 |
| 659 | 2 | L4 vs. M4 | 253184_at       | AT4G35230 | Encodes BR-signaling kinase 1 (BSK1), one of the three homologous BR-signaling kinases (BSK1, AT4G35230; BSK2, AT5G46570; BSK3, AT4G00710). Mediates signal transduction from receptor kinase BRI1 by functioning as the substrate of BRI1. Plasma membrane localized.                                                                                                                                                                                                                                                                                                                                                                                                                                                               | 31.64   | 62.17   | 0.51 | 3.64E-04 | 7.18E-04 |
| 660 | 2 | L4 vs. M4 | 250897_at       | AT5G03430 | phosphoadenosine phosphosulfate (PAPS) reductase family protein;(source:Araport11)                                                                                                                                                                                                                                                                                                                                                                                                                                                                                                                                                                                                                                                   | 63.16   | 123.71  | 0.51 | 1.10E-04 | 2.85E-04 |
| 661 | 2 | L4 vs. M4 | 246829_at       | AT5G26570 | chloroplastidic phosphoglucan, water dikinase (PWD) which is required for normal degradation of leaf starch in Arabidopsis. NMR analysis of the mutants, suggests that the gene is specifically involved in the phosphorylation of the glucosyl residues of starch at the C3 position. Stress responsive asparagine-rich protein. Binds to PevD (Verticillium dahliae ) fungal effector protein. NRP interacts with CRY2, leading to increased cytoplasmic accumulation of CRY2 in a blue light-independent manner (PMID:28633330).NRP also binds FyPP3 and recruits it to endosomes and thus targets it for degradation.                                                                                                            | 430.66  | 850.08  | 0.51 | 3.81E-05 | 1.23E-04 |
| 662 | 2 | L4 vs. M4 | 249237_at       | AT5G42050 | Encodes a putative ribosomal protein S28.                                                                                                                                                                                                                                                                                                                                                                                                                                                                                                                                                                                                                                                                                            | 94.20   | 183.37  | 0.51 | 2.24E-05 | 8.41E-05 |
| 663 | 2 | L4 vs. M4 | 247267_at       | AT5G64140 |                                                                                                                                                                                                                                                                                                                                                                                                                                                                                                                                                                                                                                                                                                                                      | 74.35   | 147.11  | 0.51 | 2.89E-05 | 1.02E-04 |
| 664 | 2 | L4 vs. M4 | 264614_s_a<br>t | AT1G02590 | Aldehyde oxidase/xanthine dehydrogenase, molybdopterin binding protein;(source:Araport11) Encodes a ribosomal protein L10 and may be involved in translation regulation. Semi-dominant mutations in SAC552 can suppress defects in acaulis5, which encodes a thermospermine synthase, by enhancing translation of acl5 and itself.                                                                                                                                                                                                                                                                                                                                                                                                   | 70.43   | 139.97  | 0.50 | 7.43E-05 | 2.09E-04 |
| 665 | 2 | L4 vs. M4 | 261490_at       | AT1G14320 | Contains dual transcription units and alternative splicing that could rescue the sterility defect of glc mutants. Shares homology to BAHD (for BEAT, AHCT, HCBT, and DAT) acyl-transferases.                                                                                                                                                                                                                                                                                                                                                                                                                                                                                                                                         | 1528.54 | 3029.30 | 0.50 | 1.26E-05 | 5.52E-05 |
| 666 | 2 | L4 vs. M4 | 264160_at       | AT1G65450 | Functions in double fertilization.                                                                                                                                                                                                                                                                                                                                                                                                                                                                                                                                                                                                                                                                                                   | 158.97  | 316.81  | 0.50 | 1.23E-05 | 5.46E-05 |
| 667 | 2 | L4 vs. M4 | 259975_at       | AT1G76470 | NAD(P)-binding Rossmann-fold superfamily protein;(source:Araport11) Encodes a SOS2-like protein kinase that is a member of the CBL-interacting protein kinase family.Loss of function mutants show a decrease in sensitivity to high pH.Phosphorylates AHA2, a plasma membrane H+ ATPase.This phosphorylation appears to regulate the activity of the proton transporter.                                                                                                                                                                                                                                                                                                                                                            | 25.22   | 50.87   | 0.50 | 8.60E-06 | 4.38E-05 |
| 668 | 2 | L4 vs. M4 | 255872_at       | AT2G30360 |                                                                                                                                                                                                                                                                                                                                                                                                                                                                                                                                                                                                                                                                                                                                      | 36.68   | 72.82   | 0.50 | 2.01E-05 | 7.77E-05 |
| 669 | 2 | L4 vs. M4 | 263954_at       | AT2G35840 | Sucrose-6F-phosphate phosphohydrolase family protein;(source:Araport11)                                                                                                                                                                                                                                                                                                                                                                                                                                                                                                                                                                                                                                                              | 367.10  | 738.65  | 0.50 | 2.13E-05 | 8.11E-05 |
| 670 | 2 | L4 vs. M4 | 267368_at       | AT2G44350 | encodes a mitochondrion targeted citrate synthase, the first enzyme of the tricarboxylic acid cycle, catalyzing the condensation of acetyl-CoA and oxaloacetate, finally yielding citrate and CoA.                                                                                                                                                                                                                                                                                                                                                                                                                                                                                                                                   | 657.11  | 1314.31 | 0.50 | 2.24E-05 | 8.41E-05 |
| 671 | 2 | L4 vs. M4 | 257932_at       | AT3G17040 | It is a RNA tetratricopeptide repeat-containing protein required for normal processing of transcripts from the polycistronic chloroplast psbB-psbT-psbH-petB-petD operon coding for proteins of the photosystem II and cytochrome b6/f complexes. Localizes to the chloroplast membrane. Involved in regulating plastidial gene expression and biogenesis. It binds in the psbT?psbH intercistronic region and blocks the progression of 5'UTR; 3'UTR; exoribonucleases, which defines the 5'UTR; end of processed psbH transcripts and also stabilizes the downstream RNA segment. In addition, HCF107 binding remodels the structure of the psbH 5'UTR; UTR in a way that can account for its ability to enhance psbH translation. | 256.78  | 516.75  | 0.50 | 1.37E-05 | 5.88E-05 |

|     |   |           |            |           |                                                                                                                                                                                                                                                                                                                                                                                                                                                                                                                                                                                                                                                                                          |        |         |      |          |          |
|-----|---|-----------|------------|-----------|------------------------------------------------------------------------------------------------------------------------------------------------------------------------------------------------------------------------------------------------------------------------------------------------------------------------------------------------------------------------------------------------------------------------------------------------------------------------------------------------------------------------------------------------------------------------------------------------------------------------------------------------------------------------------------------|--------|---------|------|----------|----------|
| 672 | 2 | L4 vs. M4 | 258452_at  | AT3G22370 | Encodes AOX1a, an isoform of alternative oxidase that is expressed in rosettes, flowers, and root. The alternative oxidase of plant mitochondria transfers electrons from the ubiquinone pool to oxygen without energy conservations. It is regulated through transcriptional control and by pyruvate. Plays a role in shoot acclimation to low temperature. Also is capable of ameliorating reactive oxygen species production when the cytochrome pathway is inhibited. AOX1a also functions as a marker for mitochondrial retrograde response. The mRNA is cell-to-cell mobile.                                                                                                       | 110.23 | 220.81  | 0.50 | 3.70E-04 | 7.26E-04 |
| 673 | 2 | L4 vs. M4 | 252287_at  | AT3G49080 | Mitochondrial ribosomal protein, similar to RPS9 from E.coli. Loss of function results in gametophyte lethality, particularly the megagametophyte.                                                                                                                                                                                                                                                                                                                                                                                                                                                                                                                                       | 138.75 | 280.24  | 0.50 | 2.96E-05 | 1.02E-04 |
| 674 | 2 | L4 vs. M4 | 252308_at  | AT3G49310 | Major facilitator superfamily protein;(source:Araport11)                                                                                                                                                                                                                                                                                                                                                                                                                                                                                                                                                                                                                                 | 37.78  | 75.96   | 0.50 | 2.85E-04 | 6.02E-04 |
| 675 | 2 | L4 vs. M4 | 251193_at  | AT3G62910 | Encodes a plastid-localized ribosome release factor 1 that is essential in chloroplast development. Pale green, albino mutant seedlings arrest early in seedling development.                                                                                                                                                                                                                                                                                                                                                                                                                                                                                                            | 121.53 | 242.75  | 0.50 | 1.47E-04 | 3.59E-04 |
| 676 | 2 | L4 vs. M4 | 252896_at  | AT4G39480 | member of CYP96A                                                                                                                                                                                                                                                                                                                                                                                                                                                                                                                                                                                                                                                                         | 19.15  | 38.57   | 0.50 | 6.92E-05 | 2.00E-04 |
| 677 | 2 | L4 vs. M4 | 252830_at  | AT4G39850 | Encodes a peroxisomal protein of the ATP binding cassette (ABC) transporter class (PMP subfamily) with significant identity to the human X-linked adrenoleukodystrophy protein (ALDP). The gene product promotes germination and represses embryo dormancy. ABI3, ABA1, FUS3 and LEC1 are epistatic to this gene. Mutants accumulate fatty acyl CoA suggesting a defect in uptake of fatty acyl CoA into the peroxisome.                                                                                                                                                                                                                                                                 | 408.43 | 812.89  | 0.50 | 1.85E-04 | 4.33E-04 |
| 678 | 2 | L4 vs. M4 | 250828_at  | AT5G05250 | hypothetical protein;(source:Araport11)                                                                                                                                                                                                                                                                                                                                                                                                                                                                                                                                                                                                                                                  | 71.45  | 143.39  | 0.50 | 2.30E-05 | 8.61E-05 |
| 679 | 2 | L4 vs. M4 | 250326_at  | AT5G12080 | Encodes a mechanosensitive (or stretch-activated) ion channel in the plasma membrane with a moderate preference for anions.Cell death activity is negatively regulated by phosphorylation while mechanosensitive properties are unaffected.                                                                                                                                                                                                                                                                                                                                                                                                                                              | 55.22  | 110.38  | 0.50 | 4.19E-05 | 1.34E-04 |
| 680 | 2 | L4 vs. M4 | 248921_at  | AT5G45950 | GDSL-motif esterase/acyltransferase/lipase. Enzyme group with broad substrate specificity that may catalyze acyltransfer or hydrolase reactions with lipid and non-lipid substrates.                                                                                                                                                                                                                                                                                                                                                                                                                                                                                                     | 258.62 | 518.41  | 0.50 | 7.21E-05 | 2.04E-04 |
| 681 | 2 | L4 vs. M4 | 246987_at  | AT5G67300 | Member of the R2R3 factor MYB gene family involved in mediating plant responses to a variety of abiotic stimuli. The mRNA is cell-to-cell mobile.                                                                                                                                                                                                                                                                                                                                                                                                                                                                                                                                        | 192.22 | 382.82  | 0.50 | 2.90E-04 | 6.09E-04 |
| 682 | 2 | L4 vs. M4 | 260005_at  | AT1G67920 | hypothetical protein;(source:Araport11)                                                                                                                                                                                                                                                                                                                                                                                                                                                                                                                                                                                                                                                  | 60.29  | 122.47  | 0.49 | 3.10E-04 | 6.44E-04 |
| 683 | 2 | L4 vs. M4 | 263136_at  | AT1G78580 | Encodes an enzyme putatively involved in trehalose biosynthesis. The protein has a trehalose synthase (TPS)-like domain but no trehalose phosphatase (TPP)-like domain. ATTPS1 is able to complement yeast tps1 mutants in vivo. The gene product modulates cell growth but not cell differentiation by determining cell wall deposition and cell division.                                                                                                                                                                                                                                                                                                                              | 38.64  | 78.17   | 0.49 | 3.05E-05 | 1.05E-04 |
| 684 | 2 | L4 vs. M4 | 265415_at  | AT2G20890 | Chloroplast-localized Thylakoid formation1 gene product involved in vesicle-mediated formation of thylakoid membranes. Thf1 antisense lines contain abnormal chloroplasts early in leaf development (chloroplasts have loosely stacked thylakoid membranes). Expression was induced in the light and decreased under dark conditions. G-alpha interaction partner that functions downstream of the plasma membrane?delimited heterotrimeric G-protein (GPA1) in a D-glucose signaling pathway. Localized to both the outer plastid membrane and the stroma. Probably involved in the metabolic pathway that controls the assembly of the PS II complex. The mRNA is cell-to-cell mobile. | 297.94 | 606.80  | 0.49 | 1.45E-05 | 6.11E-05 |
| 685 | 2 | L4 vs. M4 | 263845_at  | AT2G37040 | Encodes PAL1, a phenylalanine ammonia-lyase. Arabidopsis has four PALs: AT2G37040 (PAL1), AT3G53260 (PAL2), AT5G04230 (PAL3) and AT3G10340 (PAL4).                                                                                                                                                                                                                                                                                                                                                                                                                                                                                                                                       | 46.77  | 95.14   | 0.49 | 4.64E-05 | 1.44E-04 |
| 686 | 2 | L4 vs. M4 | 260580_at  | AT2G47390 | Prolyl oligopeptidase family protein;(source:Araport11)                                                                                                                                                                                                                                                                                                                                                                                                                                                                                                                                                                                                                                  | 106.65 | 219.10  | 0.49 | 1.77E-05 | 7.09E-05 |
| 687 | 2 | L4 vs. M4 | 251248_at  | AT3G62150 | Encodes a facultative transporter controlling auxin concentrations in plant cells.                                                                                                                                                                                                                                                                                                                                                                                                                                                                                                                                                                                                       | 102.46 | 211.25  | 0.49 | 3.70E-05 | 1.22E-04 |
| 688 | 2 | L4 vs. M4 | 255590_at  | AT4G01610 | Encodes a caspase involved in stress induced cell death. Activity detected in leaf and cell culture.                                                                                                                                                                                                                                                                                                                                                                                                                                                                                                                                                                                     | 713.76 | 1444.64 | 0.49 | 7.90E-06 | 4.12E-05 |
| 689 | 2 | L4 vs. M4 | 245293_at  | AT4G16660 | heat shock protein 70 (Hsp 70) family protein;(source:Araport11)                                                                                                                                                                                                                                                                                                                                                                                                                                                                                                                                                                                                                         | 59.58  | 122.44  | 0.49 | 2.79E-05 | 9.96E-05 |
| 690 | 2 | L4 vs. M4 | 253421_at  | AT4G32340 | Tetrapeptide repeat (TPR)-like superfamily protein;(source:Araport11)                                                                                                                                                                                                                                                                                                                                                                                                                                                                                                                                                                                                                    | 34.16  | 69.82   | 0.49 | 1.69E-04 | 4.04E-04 |
| 691 | 2 | L4 vs. M4 | 253266_s_a | AT4G34080 | myosin-4 protein (DUF641);(source:Araport11)                                                                                                                                                                                                                                                                                                                                                                                                                                                                                                                                                                                                                                             | 116.51 | 239.13  | 0.49 | 5.36E-04 | 1.00E-03 |
| 692 | 2 | L4 vs. M4 | 246162_at  | AT4G36400 | Encodes a (D)-2-hydroxyglutarate dehydrogenase.                                                                                                                                                                                                                                                                                                                                                                                                                                                                                                                                                                                                                                          | 20.71  | 42.39   | 0.49 | 2.94E-05 | 1.02E-04 |

|     |   |           |            |           |                                                                                                                                                                                                                                                                                                                                                                                                                                                                                                                                                                                                                                                                                                                                                                                                                                                                                                                                                                                                                    |         |         |      |          |          |
|-----|---|-----------|------------|-----------|--------------------------------------------------------------------------------------------------------------------------------------------------------------------------------------------------------------------------------------------------------------------------------------------------------------------------------------------------------------------------------------------------------------------------------------------------------------------------------------------------------------------------------------------------------------------------------------------------------------------------------------------------------------------------------------------------------------------------------------------------------------------------------------------------------------------------------------------------------------------------------------------------------------------------------------------------------------------------------------------------------------------|---------|---------|------|----------|----------|
|     |   |           |            |           | Encodes a bifunctional {beta}-D-xylosidase/{alpha}-L-arabinofuranosidase required for pectic arabinan modification. Located in the extracellular matrix. Gene is expressed specifically in tissues undergoing secondary wall thickening. This is a member of glycosyl hydrolase family 3 and has six other closely related members.                                                                                                                                                                                                                                                                                                                                                                                                                                                                                                                                                                                                                                                                                | 950.79  | 1956.75 | 0.49 | 5.22E-05 | 1.59E-04 |
| 693 | 2 | L4 vs. M4 | 248622_at  | AT5G49360 | RNA polymerase beta' subunit-1                                                                                                                                                                                                                                                                                                                                                                                                                                                                                                                                                                                                                                                                                                                                                                                                                                                                                                                                                                                     | 36.94   | 74.80   | 0.49 | 1.47E-05 | 6.14E-05 |
| 694 | 2 | L4 vs. M4 | 244998_at  | ATCG00180 |                                                                                                                                                                                                                                                                                                                                                                                                                                                                                                                                                                                                                                                                                                                                                                                                                                                                                                                                                                                                                    |         |         |      |          |          |
|     |   |           | 260932_s_a |           | Encodes an ATP-binding cassette (ABC) transporter. Expressed in the vascular tissue of primary stem. The mRNA is cell-to-cell mobile.                                                                                                                                                                                                                                                                                                                                                                                                                                                                                                                                                                                                                                                                                                                                                                                                                                                                              | 16.88   | 35.28   | 0.48 | 1.43E-04 | 3.50E-04 |
| 695 | 2 | L4 vs. M4 | t          | AT1G02520 | beta-galactosidase 5;(source:Araport11)                                                                                                                                                                                                                                                                                                                                                                                                                                                                                                                                                                                                                                                                                                                                                                                                                                                                                                                                                                            | 138.57  | 289.16  | 0.48 | 1.24E-05 | 5.48E-05 |
| 696 | 2 | L4 vs. M4 | 260944_at  | AT1G45130 | One of the three genes encoding subunit A of the trimeric enzyme ATP Citrate lyase                                                                                                                                                                                                                                                                                                                                                                                                                                                                                                                                                                                                                                                                                                                                                                                                                                                                                                                                 | 1021.43 | 2114.78 | 0.48 | 1.37E-05 | 5.88E-05 |
| 697 | 2 | L4 vs. M4 | 264916_at  | AT1G60810 |                                                                                                                                                                                                                                                                                                                                                                                                                                                                                                                                                                                                                                                                                                                                                                                                                                                                                                                                                                                                                    | 166.51  | 345.11  | 0.48 | 2.50E-05 | 9.16E-05 |
| 698 | 2 | L4 vs. M4 | 267115_s_a | AT2G32530 | encodes a gene similar to cellulose synthase                                                                                                                                                                                                                                                                                                                                                                                                                                                                                                                                                                                                                                                                                                                                                                                                                                                                                                                                                                       | 56.63   | 118.82  | 0.48 | 1.76E-04 | 4.17E-04 |
| 699 | 2 | L4 vs. M4 | 267388_at  | AT2G44450 | beta glucosidase 15;(source:Araport11)                                                                                                                                                                                                                                                                                                                                                                                                                                                                                                                                                                                                                                                                                                                                                                                                                                                                                                                                                                             | 54.88   | 115.30  | 0.48 | 2.46E-05 | 9.14E-05 |
| 700 | 2 | L4 vs. M4 | 259134_at  | AT3G05390 | S-adenosyl-L-methionine-dependent methyltransferase;(source:Araport11)                                                                                                                                                                                                                                                                                                                                                                                                                                                                                                                                                                                                                                                                                                                                                                                                                                                                                                                                             | 113.67  | 238.56  | 0.48 | 7.40E-06 | 4.10E-05 |
| 701 | 2 | L4 vs. M4 | 259227_at  | AT3G07750 | 3-5-exoribonuclease family protein;(source:Araport11)                                                                                                                                                                                                                                                                                                                                                                                                                                                                                                                                                                                                                                                                                                                                                                                                                                                                                                                                                              | 93.89   | 196.79  | 0.48 | 1.39E-05 | 5.90E-05 |
| 702 | 2 | L4 vs. M4 | 258375_at  | AT3G17470 | Ca2+-activated RelA/spot-like protein;(source:Araport11)                                                                                                                                                                                                                                                                                                                                                                                                                                                                                                                                                                                                                                                                                                                                                                                                                                                                                                                                                           |         |         |      |          |          |
|     |   |           |            |           | Encodes a CLAVATA1-related receptor kinase-like protein required for both shoot and flower meristem function. Very similar to BAM1, with more than 85% a.a. identity. It has a broad expression pattern and is involved in vascular strand development in the leaf, control of leaf shape, size and symmetry, male gametophyte development and ovule specification and function. Anthers of double mutants (bam1bam2) appeared abnormal at a very early stage and lack the endothecium, middle, and tapetum layers. Further analyses revealed that cells interior to the epidermis (in anther tissue) acquire some characteristics of pollen mother cells (PMCs), suggesting defects in cell fate specification. The pollen mother-like cells degenerate before the completion of meiosis, suggesting that these cells are defective. In addition, the BAM2 expression pattern supports both an early role in promoting somatic cell fates and a subsequent function in the PMCs. The mRNA is cell-to-cell mobile. | 35.38   | 73.41   | 0.48 | 1.27E-04 | 3.18E-04 |
| 703 | 2 | L4 vs. M4 | 252272_at  | AT3G49670 | 2-aminoethanethiol dioxygenase, putative (DUF1637);(source:Araport11)                                                                                                                                                                                                                                                                                                                                                                                                                                                                                                                                                                                                                                                                                                                                                                                                                                                                                                                                              | 31.05   | 64.49   | 0.48 | 2.54E-05 | 9.25E-05 |
| 704 | 2 | L4 vs. M4 | 251554_at  | AT3G58670 |                                                                                                                                                                                                                                                                                                                                                                                                                                                                                                                                                                                                                                                                                                                                                                                                                                                                                                                                                                                                                    |         |         |      |          |          |
|     |   |           |            |           | Encodes a vacuolar processing enzyme belonging to a novel group of cysteine proteinases that is expressed in vegetative organs and is upregulated in association with various types of cell death and under stressed conditions. They are essential in processing seed storage proteins and for mediating the susceptible response of toxin-induced cell death.                                                                                                                                                                                                                                                                                                                                                                                                                                                                                                                                                                                                                                                    | 857.97  | 1781.17 | 0.48 | 6.10E-06 | 3.74E-05 |
| 705 | 2 | L4 vs. M4 | 253358_at  | AT4G32940 | The At4g34135 gene encodes a flavonol 7-O-glucosyltransferase (EC 2.4.1.237) that glucosylates also with a 20 fold lower activity flavonols (kaempferol and quercetin) at the 3-O-position.                                                                                                                                                                                                                                                                                                                                                                                                                                                                                                                                                                                                                                                                                                                                                                                                                        | 102.53  | 213.45  | 0.48 | 3.78E-04 | 7.39E-04 |
|     |   |           | 253268_s_a |           |                                                                                                                                                                                                                                                                                                                                                                                                                                                                                                                                                                                                                                                                                                                                                                                                                                                                                                                                                                                                                    | 134.72  | 282.93  | 0.48 | 5.20E-05 | 1.59E-04 |
| 706 | 2 | L4 vs. M4 | t          | AT4G34135 | Required for normal processing of polycistronic plastidial transcripts                                                                                                                                                                                                                                                                                                                                                                                                                                                                                                                                                                                                                                                                                                                                                                                                                                                                                                                                             | 19.10   | 40.04   | 0.48 | 1.13E-05 | 5.19E-05 |
| 707 | 2 | L4 vs. M4 | 249691_at  | AT5G36170 | ras guanine nucleotide exchange factor Q-like protein;(source:Araport11)                                                                                                                                                                                                                                                                                                                                                                                                                                                                                                                                                                                                                                                                                                                                                                                                                                                                                                                                           | 51.52   | 110.09  | 0.47 | 2.62E-04 | 5.60E-04 |
| 708 | 2 | L4 vs. M4 | 247903_at  | AT5G57340 | Required for proper proliferation of basal cells.                                                                                                                                                                                                                                                                                                                                                                                                                                                                                                                                                                                                                                                                                                                                                                                                                                                                                                                                                                  | 118.88  | 253.69  | 0.47 | 2.42E-04 | 5.28E-04 |
| 709 | 2 | L4 vs. M4 | 260780_at  | AT1G14610 | Insulinase (Peptidase family M16) protein;(source:Araport11)                                                                                                                                                                                                                                                                                                                                                                                                                                                                                                                                                                                                                                                                                                                                                                                                                                                                                                                                                       | 42.03   | 88.59   | 0.47 | 6.90E-06 | 3.98E-05 |
| 710 | 2 | L4 vs. M4 | 265056_at  | AT1G51980 | alpha/beta-Hydrolases superfamily protein;(source:Araport11)                                                                                                                                                                                                                                                                                                                                                                                                                                                                                                                                                                                                                                                                                                                                                                                                                                                                                                                                                       | 287.64  | 615.72  | 0.47 | 5.37E-05 | 1.62E-04 |
| 711 | 2 | L4 vs. M4 | 260297_at  | AT1G80280 | Involved in the RNA splicing of rpl2 and ccmFC introns in mitochondria.                                                                                                                                                                                                                                                                                                                                                                                                                                                                                                                                                                                                                                                                                                                                                                                                                                                                                                                                            | 37.11   | 78.29   | 0.47 | 9.60E-06 | 4.71E-05 |
| 712 | 2 | L4 vs. M4 | 245164_at  | AT2G33210 | TPX2 (targeting protein for Xklp2) protein family;(source:Araport11)                                                                                                                                                                                                                                                                                                                                                                                                                                                                                                                                                                                                                                                                                                                                                                                                                                                                                                                                               | 51.78   | 110.13  | 0.47 | 6.70E-06 | 3.95E-05 |
| 713 | 2 | L4 vs. M4 | 263957_at  | AT2G35880 | cruciferin (DUF506);(source:Araport11)                                                                                                                                                                                                                                                                                                                                                                                                                                                                                                                                                                                                                                                                                                                                                                                                                                                                                                                                                                             | 105.43  | 224.33  | 0.47 | 6.03E-05 | 1.77E-04 |
| 714 | 2 | L4 vs. M4 | 267623_at  | AT2G39650 | vacuolar sorting-associated protein (DUF946);(source:Araport11)                                                                                                                                                                                                                                                                                                                                                                                                                                                                                                                                                                                                                                                                                                                                                                                                                                                                                                                                                    | 80.98   | 171.84  | 0.47 | 2.25E-04 | 4.98E-04 |
| 715 | 2 | L4 vs. M4 | 258565_at  | AT3G04350 | NOP56-like pre RNA processing ribonucleoprotein;(source:Araport11)                                                                                                                                                                                                                                                                                                                                                                                                                                                                                                                                                                                                                                                                                                                                                                                                                                                                                                                                                 | 37.19   | 78.70   | 0.47 | 2.54E-05 | 9.25E-05 |
| 716 | 2 | L4 vs. M4 | 257694_at  | AT3G12860 | Encodes a protein with putative galacturonosyltransferase activity.                                                                                                                                                                                                                                                                                                                                                                                                                                                                                                                                                                                                                                                                                                                                                                                                                                                                                                                                                |         |         |      |          |          |
| 717 | 2 | L4 vs. M4 | 256633_at  | AT3G28340 |                                                                                                                                                                                                                                                                                                                                                                                                                                                                                                                                                                                                                                                                                                                                                                                                                                                                                                                                                                                                                    |         |         |      |          |          |
|     |   |           |            |           | Encodes a cytosolic glutamine synthetase, the enzyme has high affinity with substrate ammonium                                                                                                                                                                                                                                                                                                                                                                                                                                                                                                                                                                                                                                                                                                                                                                                                                                                                                                                     | 45.29   | 96.12   | 0.47 | 1.80E-04 | 4.24E-04 |
| 718 | 2 | L4 vs. M4 | 250100_at  | AT5G16570 | Protein phosphatase 2C family protein;(source:Araport11)                                                                                                                                                                                                                                                                                                                                                                                                                                                                                                                                                                                                                                                                                                                                                                                                                                                                                                                                                           | 80.94   | 172.14  | 0.47 | 5.33E-05 | 1.61E-04 |
| 719 | 2 | L4 vs. M4 | 248249_at  | AT5G53140 |                                                                                                                                                                                                                                                                                                                                                                                                                                                                                                                                                                                                                                                                                                                                                                                                                                                                                                                                                                                                                    | 378.82  | 807.22  | 0.47 | 8.10E-06 | 4.18E-05 |
| 720 | 2 | L4 vs. M4 | 247624_at  | AT5G60160 | Vacuolar aspartyl aminopeptidase which also functions as a molecular chaperone.                                                                                                                                                                                                                                                                                                                                                                                                                                                                                                                                                                                                                                                                                                                                                                                                                                                                                                                                    | 467.48  | 984.70  | 0.47 | 1.14E-05 | 5.21E-05 |
| 721 | 2 | L4 vs. M4 | 247627_at  | AT5G60360 | Encodes a senescence-associated thiol protease. The mRNA is cell-to-cell mobile.                                                                                                                                                                                                                                                                                                                                                                                                                                                                                                                                                                                                                                                                                                                                                                                                                                                                                                                                   |         |         |      |          |          |
|     |   |           |            |           | Mutant has defect in trichome cell expansion and actin organization resulting in a distorted trichome phenotype.                                                                                                                                                                                                                                                                                                                                                                                                                                                                                                                                                                                                                                                                                                                                                                                                                                                                                                   | 77.48   | 169.04  | 0.46 | 1.86E-04 | 4.35E-04 |
| 722 | 2 | L4 vs. M4 | 262769_at  | AT1G13180 |                                                                                                                                                                                                                                                                                                                                                                                                                                                                                                                                                                                                                                                                                                                                                                                                                                                                                                                                                                                                                    |         |         |      |          |          |

|     |   |           |            |           |                                                                                                                                                                                                                                                                                                                                                                                                                                                                                                                                                                                                                                                                                                     |        |         |      |          |          |
|-----|---|-----------|------------|-----------|-----------------------------------------------------------------------------------------------------------------------------------------------------------------------------------------------------------------------------------------------------------------------------------------------------------------------------------------------------------------------------------------------------------------------------------------------------------------------------------------------------------------------------------------------------------------------------------------------------------------------------------------------------------------------------------------------------|--------|---------|------|----------|----------|
| 723 | 2 | L4 vs. M4 | 260690_at  | AT1G32340 | Encodes a protein whose sequence is similar to tobacco hairpin-induced gene (HIN1) and Arabidopsis non-race specific disease resistance gene (NDR1). Expression is not detected under normal conditions and in response to cucumber mosaic virus or spermine.                                                                                                                                                                                                                                                                                                                                                                                                                                       | 27.58  | 60.22   | 0.46 | 4.03E-04 | 7.79E-04 |
| 724 | 2 | L4 vs. M4 | 260072_at  | AT1G73650 | 3-oxo-5-alpha-steroid 4-dehydrogenase (DUF1295);(source:Araport11)                                                                                                                                                                                                                                                                                                                                                                                                                                                                                                                                                                                                                                  | 77.79  | 168.54  | 0.46 | 2.93E-05 | 1.02E-04 |
| 725 | 2 | L4 vs. M4 | 260331_at  | AT1G80270 | PENTATRICOPEPTIDE REPEAT 596;(source:Araport11)                                                                                                                                                                                                                                                                                                                                                                                                                                                                                                                                                                                                                                                     | 404.84 | 871.16  | 0.46 | 9.10E-06 | 4.52E-05 |
| 726 | 2 | L4 vs. M4 | 266743_at  | AT2G02990 | Encodes a member of the ribonuclease T2 family that responds to inorganic phosphate starvation, and inhibits production of anthocyanin. Also involved in wound-induced signaling independent of jasmonic acid. Its expression is responsive to both phosphate (Pi) and phosphite (Phi) in roots.                                                                                                                                                                                                                                                                                                                                                                                                    | 270.16 | 588.96  | 0.46 | 1.04E-05 | 4.96E-05 |
| 727 | 2 | L4 vs. M4 | 267421_at  | AT2G35040 | AICARFT/IMPCHase bienzyme family protein;(source:Araport11)                                                                                                                                                                                                                                                                                                                                                                                                                                                                                                                                                                                                                                         | 223.05 | 485.11  | 0.46 | 8.80E-06 | 4.46E-05 |
| 728 | 2 | L4 vs. M4 | 266366_at  | AT2G41420 | proline-rich family protein;(source:Araport11)                                                                                                                                                                                                                                                                                                                                                                                                                                                                                                                                                                                                                                                      | 64.95  | 142.35  | 0.46 | 6.90E-06 | 3.98E-05 |
| 729 | 2 | L4 vs. M4 | 259190_at  | AT3G01780 | Encodes TPLATE, a cytokinesis protein targeted to the cell plate. Functions in vesicle-trafficking events required for site-specific cell wall modifications during pollen germination and for anchoring of the cell plate to the mother wall at the correct cortical position.                                                                                                                                                                                                                                                                                                                                                                                                                     | 232.22 | 506.23  | 0.46 | 1.33E-04 | 3.32E-04 |
| 730 | 2 | L4 vs. M4 | 257062_at  | AT3G18290 | Encodes BRUTUS (BTS), a putative E3 ligase protein with metal ion binding and DNA binding domains, which negatively regulates the response to iron deficiency. The mRNA is cell-to-cell mobile.                                                                                                                                                                                                                                                                                                                                                                                                                                                                                                     | 212.98 | 463.10  | 0.46 | 2.26E-04 | 5.00E-04 |
| 731 | 2 | L4 vs. M4 | 258005_at  | AT3G19390 | Granulin repeat cysteine protease family protein;(source:Araport11)                                                                                                                                                                                                                                                                                                                                                                                                                                                                                                                                                                                                                                 | 627.45 | 1360.89 | 0.46 | 1.83E-05 | 7.25E-05 |
| 732 | 2 | L4 vs. M4 | 251840_at  | AT3G54960 | Encodes a protein disulfide isomerase-like (PDIL) protein, a member of a multigene family within the thioredoxin (TRX) superfamily. Transcript levels for this gene are up-regulated in response to three different chemical inducers of ER stress (dithiothreitol, beta-mercaptoethanol, and tunicamycin). Neither AtIRE1-2 nor AtbZIP60 appear to be required for this response. Structurally similar to damaged DNA binding proteins. DDB1a is part of a 350 KDa nuclear localized DET1 protein complex. This complex may physically interact with histone tails and while bound to chromatin- repress transcription of genes involved in photomorphogenesis. DDB1a is shown to be RUB-modified. | 410.31 | 898.78  | 0.46 | 2.90E-06 | 2.34E-05 |
| 733 | 2 | L4 vs. M4 | 255226_at  | AT4G05420 | DUF538 family protein (Protein of unknown function, DUF538);(source:Araport11)                                                                                                                                                                                                                                                                                                                                                                                                                                                                                                                                                                                                                      | 188.65 | 406.49  | 0.46 | 5.40E-06 | 3.52E-05 |
| 734 | 2 | L4 vs. M4 | 254201_at  | AT4G24130 |                                                                                                                                                                                                                                                                                                                                                                                                                                                                                                                                                                                                                                                                                                     | 64.97  | 142.67  | 0.46 | 3.08E-05 | 1.05E-04 |
| 735 | 2 | L4 vs. M4 | 254053_s_a | AT4G25310 | 2-oxoglutarate (2OG) and Fe(II)-dependent oxygenase superfamily protein;(source:Araport11)                                                                                                                                                                                                                                                                                                                                                                                                                                                                                                                                                                                                          | 41.60  | 91.04   | 0.46 | 1.41E-04 | 3.46E-04 |
| 736 | 2 | L4 vs. M4 | 253735_at  | AT4G29160 | SNF7 family protein;(source:Araport11)                                                                                                                                                                                                                                                                                                                                                                                                                                                                                                                                                                                                                                                              | 83.38  | 183.22  | 0.46 | 2.08E-04 | 4.72E-04 |
| 737 | 2 | L4 vs. M4 | 246516_at  | AT5G15740 | RRT1 is a member of a novel glycosyltransferase famly in plants. It functions as a rhamnosyltransferase, elongating the RG-1 backbone. It functions during seed coat mucilage development.                                                                                                                                                                                                                                                                                                                                                                                                                                                                                                          | 52.63  | 114.57  | 0.46 | 2.09E-04 | 4.72E-04 |
| 738 | 2 | L4 vs. M4 | 249346_at  | AT5G40780 | Encodes LHT1 (lysine histidine transporter), a high-affinity transporter for cellular amino acid uptake in both root epidermis and leaf mesophyll.                                                                                                                                                                                                                                                                                                                                                                                                                                                                                                                                                  | 120.27 | 261.06  | 0.46 | 1.17E-05 | 5.30E-05 |
| 739 | 2 | L4 vs. M4 | 249215_at  | AT5G42800 | dihydroflavonol reductase. Catalyzes the conversion of dihydroquercetin to leucocyanidin in the biosynthesis of anthocyanins. Not expressed in roots (qRT-PCR). The mRNA is cell-to-cell mobile. Encodes FK506-binding protein 12 (FKBP12 or FKP12). FKP12 overexpression dramatically enhances rapamycin sensitivity, whereas rapamycin inhibition is relieved in transgenic plants deficient in FKP12.                                                                                                                                                                                                                                                                                            | 44.03  | 94.90   | 0.46 | 5.30E-06 | 3.52E-05 |
| 740 | 2 | L4 vs. M4 | 247281_at  | AT5G64350 | Glutamine amidotransferase type 1 family protein;(source:Araport11)                                                                                                                                                                                                                                                                                                                                                                                                                                                                                                                                                                                                                                 | 282.99 | 615.34  | 0.46 | 1.12E-05 | 5.18E-05 |
| 741 | 2 | L4 vs. M4 | 247864_s_a | AT1G25155 |                                                                                                                                                                                                                                                                                                                                                                                                                                                                                                                                                                                                                                                                                                     | 105.83 | 232.87  | 0.45 | 2.60E-06 | 2.25E-05 |
| 742 | 2 | L4 vs. M4 | 256008_s_a | AT1G34040 | Pyridoxal phosphate (PLP)-dependent transferases superfamily protein;(source:Araport11)                                                                                                                                                                                                                                                                                                                                                                                                                                                                                                                                                                                                             | 45.65  | 102.53  | 0.45 | 2.40E-06 | 2.17E-05 |
| 743 | 2 | L4 vs. M4 | 264400_at  | AT1G61800 | glucose6-Phosphate/phosphate transporter 2. Expression is upregulated in the shoot of cax1/cax3 mutant. The mRNA is cell-to-cell mobile.                                                                                                                                                                                                                                                                                                                                                                                                                                                                                                                                                            | 368.65 | 827.97  | 0.45 | 5.40E-06 | 3.52E-05 |
| 744 | 2 | L4 vs. M4 | 259913_at  | AT1G72660 | P-loop containing nucleoside triphosphate hydrolases superfamily protein;(source:Araport11)                                                                                                                                                                                                                                                                                                                                                                                                                                                                                                                                                                                                         | 22.97  | 51.00   | 0.45 | 4.53E-05 | 1.41E-04 |
| 745 | 2 | L4 vs. M4 | 264000_at  | AT2G22500 | Encodes one of the mitochondrial dicarboxylate carriers (DIC): DIC1 (AT2G22500), DIC2 (AT4G24570), DIC3 (AT5G09470).                                                                                                                                                                                                                                                                                                                                                                                                                                                                                                                                                                                | 108.14 | 239.24  | 0.45 | 6.98E-04 | 1.24E-03 |
| 746 | 2 | L4 vs. M4 | 267040_at  | AT2G34300 | S-adenosyl-L-methionine-dependent methyltransferases superfamily protein;(source:Araport11)                                                                                                                                                                                                                                                                                                                                                                                                                                                                                                                                                                                                         | 140.36 | 308.74  | 0.45 | 3.12E-04 | 6.45E-04 |
| 747 | 2 | L4 vs. M4 | 267358_at  | AT2G39890 | Encodes a proline transporter with affinity for gly betaine, proline and GABA. Protein is expressed in the vascular tissue, specifically the phloem.                                                                                                                                                                                                                                                                                                                                                                                                                                                                                                                                                | 391.65 | 867.56  | 0.45 | 5.00E-06 | 3.46E-05 |

|     |   |           |            |           |                                                                                                                                                                                                                                                                                                                                                                                                                                                                                                                                                                                                                                                                                                                               |        |         |      |          |          |
|-----|---|-----------|------------|-----------|-------------------------------------------------------------------------------------------------------------------------------------------------------------------------------------------------------------------------------------------------------------------------------------------------------------------------------------------------------------------------------------------------------------------------------------------------------------------------------------------------------------------------------------------------------------------------------------------------------------------------------------------------------------------------------------------------------------------------------|--------|---------|------|----------|----------|
|     |   |           |            |           | Encodes a protein predicted to have dihydropyrimidine dehydrogenase activity. Its activity has not been demonstrated in vivo, but, it is required for efficient uracil catabolism in Arabidopsis. It localizes to the plastid.                                                                                                                                                                                                                                                                                                                                                                                                                                                                                                | 146.12 | 328.16  | 0.45 | 1.95E-05 | 7.62E-05 |
| 748 | 2 | L4 vs. M4 | 258162_at  | AT3G17810 | CDPK-related kinase                                                                                                                                                                                                                                                                                                                                                                                                                                                                                                                                                                                                                                                                                                           | 960.60 | 2132.88 | 0.45 | 2.70E-06 | 2.32E-05 |
| 749 | 2 | L4 vs. M4 | 252158_at  | AT3G50530 | encodes an aminopeptidase, a ortholog of mouse microsomal AP (EC 3.4.11.2).                                                                                                                                                                                                                                                                                                                                                                                                                                                                                                                                                                                                                                                   | 513.33 | 1151.38 | 0.45 | 7.12E-05 | 2.03E-04 |
| 750 | 2 | L4 vs. M4 | 253360_at  | AT4G33090 | Encodes a pheophytinase that is involved in chlorophyll breakdown. Its transcript levels increase during senescence and pph-1 mutants have a stay-green phenotype.                                                                                                                                                                                                                                                                                                                                                                                                                                                                                                                                                            | 94.34  | 211.64  | 0.45 | 4.50E-06 | 3.27E-05 |
| 751 | 2 | L4 vs. M4 | 250259_at  | AT5G13800 | Zinc-binding alcohol dehydrogenase family protein;(source:Araport11)                                                                                                                                                                                                                                                                                                                                                                                                                                                                                                                                                                                                                                                          | 72.43  | 160.51  | 0.45 | 6.00E-04 | 1.10E-03 |
| 752 | 2 | L4 vs. M4 | 249242_at  | AT5G42250 | plant/protein;(source:Araport11)                                                                                                                                                                                                                                                                                                                                                                                                                                                                                                                                                                                                                                                                                              | 17.75  | 39.09   | 0.45 | 5.40E-06 | 3.52E-05 |
| 753 | 2 | L4 vs. M4 | 249153_s_a | AT5G43390 | zinc knuckle (CCHC-type) family protein;(source:Araport11)                                                                                                                                                                                                                                                                                                                                                                                                                                                                                                                                                                                                                                                                    | 51.64  | 114.64  | 0.45 | 8.23E-05 | 2.23E-04 |
| 754 | 2 | L4 vs. M4 | 248583_at  | AT5G49930 |                                                                                                                                                                                                                                                                                                                                                                                                                                                                                                                                                                                                                                                                                                                               |        |         |      |          |          |
|     |   |           |            |           | Encodes a papain-like cysteine protease involved in tapetal programmed cell death and pollen development.CEP1 is expressed specifically in the tapetum from stages 5 to 11 of anther development. The CEP1 protein first appears as a proenzyme in precursor protease vesicles, and is then transported to the vacuole and transformed into the mature enzyme before rupture of the vacuole. CEP1 was also released to the tapetal cell wall during late stage 6 and stage 7. After the tapetal cell wall degenerated, the CEP1 enzyme entered the callose wall from the degenerated tapetal cell wall and was probably involved in degeneration of the callose wall.                                                         | 109.99 | 244.47  | 0.45 | 1.08E-05 | 5.02E-05 |
| 755 | 2 | L4 vs. M4 | 248545_at  | AT5G50260 | Galactose mutarotase-like superfamily protein;(source:Araport11)                                                                                                                                                                                                                                                                                                                                                                                                                                                                                                                                                                                                                                                              | 90.62  | 202.92  | 0.45 | 7.70E-06 | 4.11E-05 |
| 756 | 2 | L4 vs. M4 | 247929_at  | AT5G57330 | member of Plasma membrane H+-ATPase family                                                                                                                                                                                                                                                                                                                                                                                                                                                                                                                                                                                                                                                                                    | 593.54 | 1317.49 | 0.45 | 4.00E-06 | 2.98E-05 |
| 757 | 2 | L4 vs. M4 | 247902_at  | AT5G57350 | Encodes a Ran-binding protein 1 homolog (RanBP1).                                                                                                                                                                                                                                                                                                                                                                                                                                                                                                                                                                                                                                                                             | 48.87  | 109.63  | 0.45 | 1.23E-05 | 5.46E-05 |
| 758 | 2 | L4 vs. M4 | 247771_at  | AT5G58590 | plant/protein (Protein of unknown function, DUF538);(source:Araport11)                                                                                                                                                                                                                                                                                                                                                                                                                                                                                                                                                                                                                                                        | 247.41 | 560.79  | 0.44 | 2.50E-06 | 2.20E-05 |
| 759 | 2 | L4 vs. M4 | 263709_at  | AT1G09310 |                                                                                                                                                                                                                                                                                                                                                                                                                                                                                                                                                                                                                                                                                                                               |        |         |      |          |          |
|     |   |           |            |           | Encodes a bifunctional nuclease that acts on both RNA and DNA involved in nucleic acid degradation to facilitate nucleotide and phosphate recovery during senescence. It has mismatch-specific endonuclease activity with wide recognition of single base mismatches as well as the ability to cleave indel types of mismatches (heteroduplexes with loops).                                                                                                                                                                                                                                                                                                                                                                  | 95.78  | 215.31  | 0.44 | 7.70E-06 | 4.11E-05 |
| 760 | 2 | L4 vs. M4 | 262454_at  | AT1G11190 | Encodes a 5-methylthioribose-1-phosphate isomerase.                                                                                                                                                                                                                                                                                                                                                                                                                                                                                                                                                                                                                                                                           | 215.44 | 484.20  | 0.44 | 8.60E-06 | 4.38E-05 |
| 761 | 2 | L4 vs. M4 | 266033_at  | AT2G05830 | Encodes ABCC13/MRP11, a member of the multidrug resistance associated protein MRP/ABCC subfamily. Its expression is induced by gibberellic acid and downregulated by naphthalene acetic acid, abscisic acid, and zeatin.                                                                                                                                                                                                                                                                                                                                                                                                                                                                                                      | 58.89  | 135.00  | 0.44 | 4.80E-06 | 3.41E-05 |
| 762 | 2 | L4 vs. M4 | 266038_at  | AT2G07680 | transmembrane protein, putative (DUF247);(source:Araport11)                                                                                                                                                                                                                                                                                                                                                                                                                                                                                                                                                                                                                                                                   | 18.31  | 41.88   | 0.44 | 3.81E-04 | 7.42E-04 |
| 763 | 2 | L4 vs. M4 | 252190_at  | AT3G50170 |                                                                                                                                                                                                                                                                                                                                                                                                                                                                                                                                                                                                                                                                                                                               |        |         |      |          |          |
|     |   |           |            |           | Encodes a 22&#945; hydroxylase whose reaction is a rate-limiting step in brassinosteroid biosynthetic pathway. The protein is a member of CYP90B gene family. CLM is an epi-allele with small, compressed rosette, reduced internode length, and reduced fertility, appears in selfed ddm mutant plants possibly due to loss of cytosine methylation. Transcripts accumulate in actively growing tissues, and GUS expression is negatively regulated by brassinosteroids. Localized in the endoplasmic reticulum. The in vitro expressed protein can perform the C-22 hydroxylation of a variety of C27-, C28- and C29-sterols. Cholesterol was the best substrate, followed by campesterol. Sitosterol was a poor substrate. | 361.68 | 820.19  | 0.44 | 2.90E-06 | 2.34E-05 |
| 764 | 2 | L4 vs. M4 | 252184_at  | AT3G50660 | Encodes an isoform of UDP-glucuronic acid decarboxylase, which is predicted to be membrane-bound by PSORT analysis. This enzyme produces UDP-xylose, which is a substrate for many cell wall carbohydrates including hemicellulose and pectin. UDP-xylose is also known to feedback regulate several cell wall biosynthetic enzymes.                                                                                                                                                                                                                                                                                                                                                                                          | 46.93  | 107.55  | 0.44 | 4.07E-04 | 7.83E-04 |
| 765 | 2 | L4 vs. M4 | 251945_at  | AT3G53520 |                                                                                                                                                                                                                                                                                                                                                                                                                                                                                                                                                                                                                                                                                                                               |        |         |      |          |          |
|     |   |           |            |           | Predicted to be secreted protein based on signalP prediction. Involved in starch mobilization. Mutants are defective in alpha-amylase activity. (Note: AMY1 has been found in the literature to be referred to as AMY3, which is not to be confused with AMY3/At1g69830).                                                                                                                                                                                                                                                                                                                                                                                                                                                     | 352.80 | 810.04  | 0.44 | 5.82E-05 | 1.72E-04 |
| 766 | 2 | L4 vs. M4 | 254101_at  | AT4G25000 |                                                                                                                                                                                                                                                                                                                                                                                                                                                                                                                                                                                                                                                                                                                               |        |         |      |          |          |
|     |   |           |            |           | This is a splice variant of the LKR/SDH locus. It encodes a bifunctional polypeptide lysine-ketoglutarate reductase and saccharopine dehydrogenase involved in lysine degradation. There is another splice variant that encodes a mono saccharopine dehydrogenase protein. Gene expression is induced by abscisic acid, jasmonate, and under sucrose starvation.                                                                                                                                                                                                                                                                                                                                                              | 38.98  | 88.41   | 0.44 | 7.50E-06 | 4.10E-05 |
| 767 | 2 | L4 vs. M4 | 253373_at  | AT4G33150 |                                                                                                                                                                                                                                                                                                                                                                                                                                                                                                                                                                                                                                                                                                                               |        |         |      |          |          |

|     |   |           |            |           |                                                                                                                                                                                                                                                                                                                                                                                                                                                                                                                                                                                                                                                                    |        |         |      |          |          |
|-----|---|-----------|------------|-----------|--------------------------------------------------------------------------------------------------------------------------------------------------------------------------------------------------------------------------------------------------------------------------------------------------------------------------------------------------------------------------------------------------------------------------------------------------------------------------------------------------------------------------------------------------------------------------------------------------------------------------------------------------------------------|--------|---------|------|----------|----------|
| 768 | 2 | L4 vs. M4 | 245701_at  | AT5G04140 | Encodes a gene whose sequence is similar to ferredoxin dependent glutamate synthase (Fd-GOGAT). Expression in leaves is induced by light and sucrose. Proposed to be involved in photorespiration and nitrogen assimilation. The mRNA is cell-to-cell mobile.<br>Major facilitator superfamily protein;(source:Araport11)                                                                                                                                                                                                                                                                                                                                          | 585.94 | 1326.25 | 0.44 | 1.63E-05 | 6.71E-05 |
| 769 | 2 | L4 vs. M4 | 246566_at  | AT5G14940 |                                                                                                                                                                                                                                                                                                                                                                                                                                                                                                                                                                                                                                                                    | 61.91  | 140.38  | 0.44 | 1.69E-05 | 6.90E-05 |
| 770 | 2 | L4 vs. M4 | 246510_at  | AT5G15410 | 'defense, no death' gene (DND1) encodes a mutated cyclic nucleotide-gated cation channel; Same as CNGC2 (article ID 229): Cyclic nucleotide gated channel, activated by cAMP, conducts K+ and other monovalent cations but excludes Na+, does not contain the GYG amino acid sequence found in other channels with this conductivity profile. Conducts Ca2+ into cells which is linked to the generation of NO and the NO signaling pathway involved in the innate immune response to pathogens. CNGC2 could be the key step mediating bulk Ca2+ influx into leaf cells after unloading from the vascular and have no direct roles in the leaf development and HR. | 65.67  | 148.80  | 0.44 | 2.53E-04 | 5.46E-04 |
| 771 | 2 | L4 vs. M4 | 264550_at  | AT1G09450 | Encodes a protein kinase that phosphorylates histone H3 at Thr3 and Thr11 and plays a role in mitotic cell division.<br>alpha/beta-Hydrolases superfamily protein;(source:Araport11)                                                                                                                                                                                                                                                                                                                                                                                                                                                                               | 32.53  | 76.08   | 0.43 | 2.20E-06 | 2.09E-05 |
| 772 | 2 | L4 vs. M4 | 261032_at  | AT1G17430 |                                                                                                                                                                                                                                                                                                                                                                                                                                                                                                                                                                                                                                                                    | 88.55  | 203.65  | 0.43 | 2.30E-06 | 2.09E-05 |
| 773 | 2 | L4 vs. M4 | 265940_at  | AT2G19480 | This gene is predicted to encode a nucleosome assembly protein. Plant lines expressing an RNAi construct directed against this gene show a reduction in agrobacterium-mediated root transformation. The mRNA is cell-to-cell mobile. Plants mutated in three ubiquitously expressed NAP1 genes (NAP1;1-NAP1;3) and organ-specifically expressed NAP1;4 gene show hypersensitivity to genotoxic stresses including UV and DSB-inducing agent Bleomycin. The NAP1 genes act synergistically with NRP genes in promoting somatic homologous recombination.<br>Member of TETRASPANIN family<br>jacalin-related lectin 23;(source:Araport11)                            | 74.20  | 171.97  | 0.43 | 7.90E-06 | 4.12E-05 |
| 774 | 2 | L4 vs. M4 | 267293_at  | AT2G23810 |                                                                                                                                                                                                                                                                                                                                                                                                                                                                                                                                                                                                                                                                    | 67.43  | 155.54  | 0.43 | 3.20E-06 | 2.53E-05 |
| 775 | 2 | L4 vs. M4 | 266989_at  | AT2G39330 |                                                                                                                                                                                                                                                                                                                                                                                                                                                                                                                                                                                                                                                                    | 939.85 | 2208.50 | 0.43 | 2.00E-06 | 1.99E-05 |
| 776 | 2 | L4 vs. M4 | 253872_at  | AT4G27410 | Encodes a NAC transcription factor induced in response to desiccation. It is localized to the nucleus and acts as a transcriptional activator in ABA-mediated dehydration response.<br>methyltransferase;(source:Araport11)                                                                                                                                                                                                                                                                                                                                                                                                                                        | 66.67  | 156.13  | 0.43 | 1.80E-06 | 1.90E-05 |
| 777 | 2 | L4 vs. M4 | 251055_at  | AT5G01710 |                                                                                                                                                                                                                                                                                                                                                                                                                                                                                                                                                                                                                                                                    | 62.01  | 144.46  | 0.43 | 1.90E-06 | 1.94E-05 |
| 778 | 2 | L4 vs. M4 | 250676_at  | AT5G06320 | encodes a protein whose sequence is similar to tobacco hairpin-induced gene (HIN1) and Arabidopsis non-race specific disease resistance gene (NDR1). Expression of this gene is induced by cucumber mosaic virus, spermine and Pseudomonas syringae pv. tomato DC3000. The gene product is localized to the plasma membrane.<br>Pectinacetylsterase family protein;(source:Araport11)                                                                                                                                                                                                                                                                              | 40.37  | 94.59   | 0.43 | 1.84E-05 | 7.27E-05 |
| 779 | 2 | L4 vs. M4 | 248968_at  | AT5G45280 |                                                                                                                                                                                                                                                                                                                                                                                                                                                                                                                                                                                                                                                                    | 357.16 | 822.73  | 0.43 | 5.50E-06 | 3.52E-05 |
| 780 | 2 | L4 vs. M4 | 261405_at  | AT1G18740 | DUF793 domain containing protein. Expression is induced by cold. Loss of function mutations are more sensitive to freezing and have reduced levels of CBFs. May act by preventing degradation of CBFs.                                                                                                                                                                                                                                                                                                                                                                                                                                                             | 200.74 | 474.64  | 0.42 | 1.05E-05 | 4.97E-05 |
| 781 | 2 | L4 vs. M4 | 261650_at  | AT1G27770 |                                                                                                                                                                                                                                                                                                                                                                                                                                                                                                                                                                                                                                                                    | 81.26  | 192.62  | 0.42 | 5.90E-06 | 3.71E-05 |
| 782 | 2 | L4 vs. M4 | 263157_at  | AT1G54100 | Encodes a chloroplast envelope Ca2+-ATPase with an N-terminal autoinhibitor.<br>Aldehyde dehydrogenase                                                                                                                                                                                                                                                                                                                                                                                                                                                                                                                                                             | 849.10 | 2028.09 | 0.42 | 2.90E-06 | 2.34E-05 |
| 783 | 2 | L4 vs. M4 | 265929_s_a | AT2G18570 |                                                                                                                                                                                                                                                                                                                                                                                                                                                                                                                                                                                                                                                                    | 295.01 | 694.61  | 0.42 | 1.04E-05 | 4.96E-05 |
| 784 | 2 | L4 vs. M4 | 267319_at  | AT2G34660 | encodes a multidrug resistance-associated protein that is MgATP-energized glutathione S-conjugate pump. An ABCC-type arsenite-phytochelatin transporter. The expression of this gene is upregulated by herbicide safeners such as benoxacor and fenclorim. The mRNA is cell-to-cell mobile.<br>Cysteine proteinases superfamily protein;(source:Araport11)                                                                                                                                                                                                                                                                                                         | 171.85 | 413.22  | 0.42 | 6.50E-06 | 3.88E-05 |
| 785 | 2 | L4 vs. M4 | 252622_at  | AT3G45310 |                                                                                                                                                                                                                                                                                                                                                                                                                                                                                                                                                                                                                                                                    | 148.11 | 349.66  | 0.42 | 7.40E-06 | 4.10E-05 |
| 786 | 2 | L4 vs. M4 | 249618_at  | AT5G37490 | ARM repeat superfamily protein;(source:Araport11)                                                                                                                                                                                                                                                                                                                                                                                                                                                                                                                                                                                                                  | 18.44  | 44.19   | 0.42 | 2.06E-05 | 7.90E-05 |
| 787 | 2 | L4 vs. M4 | 249581_at  | AT5G37600 | encodes a cytosolic glutamine synthetase, the enzyme has high affinity with substrate ammonium                                                                                                                                                                                                                                                                                                                                                                                                                                                                                                                                                                     | 628.87 | 1496.74 | 0.42 | 1.60E-06 | 1.74E-05 |
| 788 | 2 | L4 vs. M4 | 265741_at  | AT2G01320 |                                                                                                                                                                                                                                                                                                                                                                                                                                                                                                                                                                                                                                                                    | 48.42  | 117.36  | 0.41 | 3.70E-06 | 2.84E-05 |
| 789 | 2 | L4 vs. M4 | 266613_at  | AT2G14900 | ABC-2 type transporter family protein;(source:Araport11)<br>Gibberellin-regulated family protein;(source:Araport11)                                                                                                                                                                                                                                                                                                                                                                                                                                                                                                                                                | 118.28 | 285.97  | 0.41 | 1.60E-06 | 1.74E-05 |
| 790 | 2 | L4 vs. M4 | 259116_at  | AT3G01350 |                                                                                                                                                                                                                                                                                                                                                                                                                                                                                                                                                                                                                                                                    | 22.98  | 56.29   | 0.41 | 7.90E-06 | 4.12E-05 |
| 791 | 2 | L4 vs. M4 | 252123_at  | AT3G51240 | Major facilitator superfamily protein;(source:Araport11)<br>Encodes flavanone 3-hydroxylase that is coordinately expressed with chalcone synthase and chalcone isomerases. Regulates flavonoid biosynthesis. Not responsive to auxin or ethylene stimulus (qRT-PCR).                                                                                                                                                                                                                                                                                                                                                                                               | 68.31  | 165.83  | 0.41 | 1.60E-06 | 1.74E-05 |
| 792 | 2 | L4 vs. M4 | 251753_at  | AT3G55760 |                                                                                                                                                                                                                                                                                                                                                                                                                                                                                                                                                                                                                                                                    | 77.17  | 189.35  | 0.41 | 9.57E-05 | 2.56E-04 |
| 793 | 2 | L4 vs. M4 | 251189_at  | AT3G62650 | hypothetical protein;(source:Araport11)                                                                                                                                                                                                                                                                                                                                                                                                                                                                                                                                                                                                                            | 45.35  | 109.54  | 0.41 | 4.40E-06 | 3.26E-05 |

|     |   |           |                         |           |                                                                                                                                                                                                                                                                                                                                                                                                                                                                                                                                                                                                                                                                                                                                                             |        |         |      |          |          |
|-----|---|-----------|-------------------------|-----------|-------------------------------------------------------------------------------------------------------------------------------------------------------------------------------------------------------------------------------------------------------------------------------------------------------------------------------------------------------------------------------------------------------------------------------------------------------------------------------------------------------------------------------------------------------------------------------------------------------------------------------------------------------------------------------------------------------------------------------------------------------------|--------|---------|------|----------|----------|
| 794 | 2 | L4 vs. M4 | 255447_at<br>254283_s_a | AT4G02790 | Encodes a GTPase that is targeted to chloroplasts and co-fractionated with chloroplast ribosomes. Mutants are embryo lethal due to this essential function being lost.                                                                                                                                                                                                                                                                                                                                                                                                                                                                                                                                                                                      | 126.97 | 307.29  | 0.41 | 7.69E-05 | 2.13E-04 |
| 795 | 2 | L4 vs. M4 | t                       | AT4G22870 | 2-oxoglutarate (2OG) and Fe(II)-dependent oxygenase superfamily protein;(source:Araport11)<br>Encodes a nuclear localized DEAH-box containing protein that is involved in miRNA biogenesis. Loss of function mutants are embryo lethal. Gene silencing experiments demonstrated its role in the localization of DCL-1 and HYL1 to the nuclear D-body. In silenced lines, miRNA production is suppressed and plants have developmental abnormalities and are hypersensitive to fungal pathogens.                                                                                                                                                                                                                                                             | 183.27 | 448.25  | 0.41 | 2.90E-06 | 2.34E-05 |
| 796 | 2 | L4 vs. M4 | 250273_at               | AT5G13010 | Gap junction beta-4 protein;(source:Araport11)                                                                                                                                                                                                                                                                                                                                                                                                                                                                                                                                                                                                                                                                                                              | 67.92  | 166.31  | 0.41 | 8.22E-05 | 2.23E-04 |
| 797 | 2 | L4 vs. M4 | 245981_at               | AT5G13100 |                                                                                                                                                                                                                                                                                                                                                                                                                                                                                                                                                                                                                                                                                                                                                             | 166.82 | 409.90  | 0.41 | 1.40E-06 | 1.63E-05 |
| 798 | 2 | L4 vs. M4 | 259393_at               | AT1G06410 | Encodes an enzyme putatively involved in trehalose biosynthesis. Though the protein has both trehalose-6-phosphate synthase (TPS)-like and trehalose-6-phosphate phosphatase (TPP)-like domains, neither activity has been detected in enzymatic assays nor has the protein been able to complement yeast TPS or TPP mutants.                                                                                                                                                                                                                                                                                                                                                                                                                               | 239.74 | 604.01  | 0.40 | 3.08E-05 | 1.05E-04 |
| 799 | 2 | L4 vs. M4 | 255940_at               | AT1G20380 | Prolyl oligopeptidase family protein;(source:Araport11)                                                                                                                                                                                                                                                                                                                                                                                                                                                                                                                                                                                                                                                                                                     | 115.37 | 290.31  | 0.40 | 1.05E-05 | 4.97E-05 |
| 800 | 2 | L4 vs. M4 | 261294_at               | AT1G48430 | Dihydroxyacetone kinase;(source:Araport11)                                                                                                                                                                                                                                                                                                                                                                                                                                                                                                                                                                                                                                                                                                                  | 60.78  | 150.54  | 0.40 | 6.00E-06 | 3.72E-05 |
| 801 | 2 | L4 vs. M4 | 262360_at               | AT1G73080 | Encodes a leucine-rich repeat receptor kinase. Functions as a receptor for AtPep1 to amplify innate immunity response to pathogen attacks. The mRNA is cell-to-cell mobile.                                                                                                                                                                                                                                                                                                                                                                                                                                                                                                                                                                                 | 102.80 | 258.48  | 0.40 | 7.50E-06 | 4.10E-05 |
| 802 | 2 | L4 vs. M4 | 267357_at               | AT2G40000 | ortholog of sugar beet HS1 PRO-1 2;(source:Araport11)                                                                                                                                                                                                                                                                                                                                                                                                                                                                                                                                                                                                                                                                                                       | 54.68  | 138.40  | 0.40 | 7.74E-05 | 2.14E-04 |
| 803 | 2 | L4 vs. M4 | 260567_at<br>263776_s_a | AT2G43820 | Encodes a nicotinate-O-glycosyltransferase. Induced by Salicylic acid, virus, fungus and bacteria. Also involved in the tryptophan synthesis pathway. Independent of NPR1 for their induction by salicylic acid. UGT74F1 transfers UDP:glucose to salicylic acid (forming a glucoside (SAG) and a glucose ester (SGE)), benzoic acid, and anthranilate in vitro. UGT74F2 shows a weak ability to catalyze the formation of the p-aminobenzoate-glucose ester in vitro. But, UGT75B1 appears to be the dominant pABA acylglucosyltransferase in vivo based on assays in leaves, flowers, and siliques. Member of Cyclic nucleotide gated channel family. Positive regulator of resistance against avirulent fungal pathogen.The mRNA is cell-to-cell mobile. | 170.05 | 420.91  | 0.40 | 2.30E-06 | 2.09E-05 |
| 804 | 2 | L4 vs. M4 | t                       | AT2G46440 |                                                                                                                                                                                                                                                                                                                                                                                                                                                                                                                                                                                                                                                                                                                                                             | 21.52  | 53.91   | 0.40 | 2.08E-04 | 4.72E-04 |
| 805 | 2 | L4 vs. M4 | 258299_at               | AT3G23410 | Encodes a fatty alcohol oxidase.                                                                                                                                                                                                                                                                                                                                                                                                                                                                                                                                                                                                                                                                                                                            | 37.62  | 93.27   | 0.40 | 7.60E-06 | 4.10E-05 |
| 806 | 2 | L4 vs. M4 | 254630_at               | AT4G18360 | Encodes a glycolate oxidase that modulates reactive oxygen species-mediated signal transduction during nonhost resistance.                                                                                                                                                                                                                                                                                                                                                                                                                                                                                                                                                                                                                                  | 26.99  | 68.24   | 0.40 | 2.95E-05 | 1.02E-04 |
| 807 | 2 | L4 vs. M4 | 248309_at               | AT5G52540 | keratin-associated protein, putative (DUF819);(source:Araport11)                                                                                                                                                                                                                                                                                                                                                                                                                                                                                                                                                                                                                                                                                            | 481.86 | 1190.12 | 0.40 | 7.80E-06 | 4.12E-05 |
| 808 | 2 | L4 vs. M4 | 248255_at               | AT5G53350 | CLP protease regulatory subunit CLPX mRNA, nuclear gene                                                                                                                                                                                                                                                                                                                                                                                                                                                                                                                                                                                                                                                                                                     | 33.39  | 83.68   | 0.40 | 4.44E-05 | 1.40E-04 |
| 809 | 2 | L4 vs. M4 | 244936_at               | ATCG01100 | NADH dehydrogenase ND1                                                                                                                                                                                                                                                                                                                                                                                                                                                                                                                                                                                                                                                                                                                                      | 52.25  | 130.66  | 0.40 | 2.54E-04 | 5.46E-04 |
| 810 | 2 | L4 vs. M4 | 252592_at               | AT3G45640 | Encodes a mitogen-activated kinase whose mRNA levels increase in response to touch, cold, salinity stress and chitin oligomers.Also functions in ovule development. Heterozygous MPK3 mutants in a homozygous MPK6 background are female sterile due to defects in integument development. MPK3 can be dephosphorylated by MKP2 in vitro. The mRNA is cell-to-cell mobile.                                                                                                                                                                                                                                                                                                                                                                                  | 51.84  | 131.54  | 0.39 | 7.60E-06 | 4.10E-05 |
| 811 | 2 | L4 vs. M4 | 251962_at               | AT3G53420 | a member of the plasma membrane intrinsic protein subfamily PIP2. localizes to the plasma membrane and exhibits water transport activity in Xenopus oocyte. expressed specifically in the vascular bundles and protein level increases slightly during leaf dev. When expressed in yeast cells can conduct hydrogen peroxide into those cells.                                                                                                                                                                                                                                                                                                                                                                                                              | 790.85 | 2005.21 | 0.39 | 7.00E-06 | 4.00E-05 |
| 812 | 2 | L4 vs. M4 | 253343_at               | AT4G33540 | metallo-beta-lactamase family protein;(source:Araport11)                                                                                                                                                                                                                                                                                                                                                                                                                                                                                                                                                                                                                                                                                                    | 172.97 | 442.35  | 0.39 | 8.00E-07 | 1.21E-05 |
| 813 | 2 | L4 vs. M4 | 245692_at               | AT5G04150 | Encodes a member of the basic helix-loop-helix transcription factor family protein. Functions as a key regulator of iron-deficiency responses independent of the master regulator FIT. Likely regulates genes involved in the distribution of iron within the plant.                                                                                                                                                                                                                                                                                                                                                                                                                                                                                        | 30.20  | 78.04   | 0.39 | 2.11E-04 | 4.75E-04 |
| 814 | 2 | L4 vs. M4 | 246002_at               | AT5G20740 | Plant invertase/pectin methylesterase inhibitor superfamily protein;(source:Araport11)                                                                                                                                                                                                                                                                                                                                                                                                                                                                                                                                                                                                                                                                      | 179.80 | 460.68  | 0.39 | 8.00E-07 | 1.21E-05 |
| 815 | 2 | L4 vs. M4 | 247156_at               | AT5G65760 | Serine carboxypeptidase S28 family protein;(source:Araport11)                                                                                                                                                                                                                                                                                                                                                                                                                                                                                                                                                                                                                                                                                               | 86.47  | 223.60  | 0.39 | 6.00E-06 | 3.72E-05 |

|     |   |           |             |           |                                                                                                                                                                                                                                                                                                                                                                                                                                                                                                                                                                                                                                                                                                            |         |         |      |          |          |
|-----|---|-----------|-------------|-----------|------------------------------------------------------------------------------------------------------------------------------------------------------------------------------------------------------------------------------------------------------------------------------------------------------------------------------------------------------------------------------------------------------------------------------------------------------------------------------------------------------------------------------------------------------------------------------------------------------------------------------------------------------------------------------------------------------------|---------|---------|------|----------|----------|
| 816 | 2 | L4 vs. M4 | 262238_at   | AT1G48300 | Cytosolic iron-sulfur protein with a [2Fe-2S] cluster which synthesizes triacylglycerol (DGAT activity). encodes allene oxide cyclase. One of four genes in Arabidopsis that encode this enzyme, which catalyzes an essential step in jasmonic acid biosynthesis. Gene expression is induced during senescence, a process that involves jasmonic acid signalling pathway. The mRNA is cell-to-cell mobile.                                                                                                                                                                                                                                                                                                 | 75.57   | 200.07  | 0.38 | 1.23E-05 | 5.46E-05 |
| 817 | 2 | L4 vs. M4 | 257641_s_at | AT3G25760 | Cellulase (glycosyl hydrolase family 5) protein;(source:Araport11)                                                                                                                                                                                                                                                                                                                                                                                                                                                                                                                                                                                                                                         | 242.05  | 640.23  | 0.38 | 4.38E-05 | 1.39E-04 |
| 818 | 2 | L4 vs. M4 | 257629_at   | AT3G26140 | Encodes a protein with putative sucrose-phosphate synthase activity.                                                                                                                                                                                                                                                                                                                                                                                                                                                                                                                                                                                                                                       | 1381.91 | 3610.53 | 0.38 | 1.90E-06 | 1.94E-05 |
| 819 | 2 | L4 vs. M4 | 255016_at   | AT4G10120 | Encodes a cytochrome P-450 gene that is involved in leaf blade expansion by controlling polar cell expansion in the leaf length direction. Member of the CYP90C CYP450 family. ROT3 was shown to be involved in brassinosteroid biosynthesis, most likely in the conversion step of typhasterol (TY) to castasterone (CS). As 6-deoxo-CS was unable to restore the phenotype of rot3-1, it has been postulated that ROT3 might be specifically involved in the conversion of TY to CS in the C6-oxidation pathway of brassinolide. Recently, CYP90C1 was shown to catalyse the C-23 hydroxylation of several brassinosteroids (the enzyme has a broad specificity for 22-hydroxylated substrates).         | 162.03  | 430.41  | 0.38 | 6.90E-06 | 3.98E-05 |
| 820 | 2 | L4 vs. M4 | 246216_at   | AT4G36380 | alpha/beta-Hydrolases superfamily protein;(source:Araport11)                                                                                                                                                                                                                                                                                                                                                                                                                                                                                                                                                                                                                                               | 75.15   | 196.32  | 0.38 | 6.00E-07 | 9.91E-06 |
| 821 | 2 | L4 vs. M4 | 249690_at   | AT5G36210 | Encodes a ferric chelate reductase whose transcription is regulated by FIT1. Expressed in the root, shoot, flower and cotyledon.                                                                                                                                                                                                                                                                                                                                                                                                                                                                                                                                                                           | 82.51   | 219.15  | 0.38 | 2.20E-06 | 2.09E-05 |
| 822 | 2 | L4 vs. M4 | 264751_at   | AT1G23020 | hypothetical protein (DUF1645);(source:Araport11)                                                                                                                                                                                                                                                                                                                                                                                                                                                                                                                                                                                                                                                          | 26.71   | 71.53   | 0.37 | 3.12E-04 | 6.45E-04 |
| 823 | 2 | L4 vs. M4 | 265184_at   | AT1G23710 | Encodes a protein with phytol ester synthesis and diacylglycerol acyltransferase activities that is involved in the deposition of free phytol and free fatty acids in the form of phytol esters in chloroplasts, a process involved in maintaining the integrity of the photosynthetic membrane during abiotic stress and senescence.                                                                                                                                                                                                                                                                                                                                                                      | 26.95   | 72.49   | 0.37 | 6.60E-06 | 3.92E-05 |
| 824 | 2 | L4 vs. M4 | 264186_at   | AT1G54570 | NOP56-like protein                                                                                                                                                                                                                                                                                                                                                                                                                                                                                                                                                                                                                                                                                         | 127.92  | 344.82  | 0.37 | 4.00E-07 | 7.54E-06 |
| 825 | 2 | L4 vs. M4 | 262094_at   | AT1G56110 | DNA glycosylase superfamily protein;(source:Araport11)                                                                                                                                                                                                                                                                                                                                                                                                                                                                                                                                                                                                                                                     | 183.86  | 501.10  | 0.37 | 3.81E-05 | 1.23E-04 |
| 826 | 2 | L4 vs. M4 | 257701_at   | AT3G12710 | member of MRP subfamily                                                                                                                                                                                                                                                                                                                                                                                                                                                                                                                                                                                                                                                                                    | 39.51   | 106.18  | 0.37 | 7.20E-06 | 4.07E-05 |
| 827 | 2 | L4 vs. M4 | 258033_at   | AT3G21250 | Auxin-responsive family protein;(source:Araport11)                                                                                                                                                                                                                                                                                                                                                                                                                                                                                                                                                                                                                                                         | 61.00   | 165.85  | 0.37 | 5.00E-07 | 9.10E-06 |
| 828 | 2 | L4 vs. M4 | 249719_at   | AT5G35735 | BTB and TAZ domain protein. Located in cytoplasm and expressed in fruit, flower and leaves.                                                                                                                                                                                                                                                                                                                                                                                                                                                                                                                                                                                                                | 22.27   | 60.84   | 0.37 | 1.80E-06 | 1.90E-05 |
| 829 | 2 | L4 vs. M4 | 247013_at   | AT5G67480 | PSII D2 protein                                                                                                                                                                                                                                                                                                                                                                                                                                                                                                                                                                                                                                                                                            | 52.03   | 142.17  | 0.37 | 2.30E-06 | 2.09E-05 |
| 830 | 2 | L4 vs. M4 | 245002_at   | ATCG00270 | member of Alpha-Expansin Gene Family. Naming convention from the Expansin Working Group (Kende et al, 2004. Plant Mol Bio)                                                                                                                                                                                                                                                                                                                                                                                                                                                                                                                                                                                 | 109.45  | 298.84  | 0.37 | 1.06E-05 | 4.97E-05 |
| 831 | 2 | L4 vs. M4 | 261226_at   | AT1G20190 | 10-formyltetrahydrofolate synthetase (THFS) mRNA, complete The mRNA is cell-to-cell mobile.                                                                                                                                                                                                                                                                                                                                                                                                                                                                                                                                                                                                                | 76.73   | 213.55  | 0.36 | 6.00E-07 | 9.91E-06 |
| 832 | 2 | L4 vs. M4 | 261864_s_at | AT1G50480 | TRAF-like family protein;(source:Araport11)                                                                                                                                                                                                                                                                                                                                                                                                                                                                                                                                                                                                                                                                | 1081.71 | 2974.66 | 0.36 | 1.00E-06 | 1.34E-05 |
| 833 | 2 | L4 vs. M4 | 267644_s_at | AT2G32880 | Heat shock protein 70 (Hsp 70) family protein;(source:Araport11)                                                                                                                                                                                                                                                                                                                                                                                                                                                                                                                                                                                                                                           | 27.72   | 77.83   | 0.36 | 1.66E-04 | 3.99E-04 |
| 834 | 2 | L4 vs. M4 | 258979_at   | AT3G09440 | Encodes a di- and tri-peptide transporter that recognizes a variety of different amino acid combinations. GFP-tagged PTR1 localizes to the plasma membrane and has 8 to 11 predicted transmembrane domains. PTR1 is expressed in a number of different vascular tissues throughout the plant based on promoter:GUS expression analysis. ptr1 mutants have a lower dry weight than wild type plants when both are grown with Pro-Ala or Ala-Ala dipeptides as their nitrogen source, suggesting that PTR1 plays a role in dipeptide uptake in the roots. Furthermore N content of ptr1 mutants is lower than that of wild type plants when grown with Pro-Ala or a mixture of dipeptides as nitrogen source | 67.06   | 187.43  | 0.36 | 2.20E-06 | 2.09E-05 |
| 835 | 2 | L4 vs. M4 | 251882_at   | AT3G54140 | Encodes a protein containing a UND, a U-box, and an ARM domain. This protein has E3 ubiquitin ligase activity. It is required for cell death and full resistance specified by Arabidopsis RPM1 and RPS4 resistance proteins against Pseudomonas syringae pv tomato. The mRNA is cell-to-cell mobile.                                                                                                                                                                                                                                                                                                                                                                                                       | 129.51  | 364.78  | 0.36 | 1.45E-05 | 6.11E-05 |
| 836 | 2 | L4 vs. M4 | 259826_at   | AT1G29340 | phosphofructokinase 6;(source:Araport11)                                                                                                                                                                                                                                                                                                                                                                                                                                                                                                                                                                                                                                                                   | 69.90   | 202.59  | 0.35 | 1.40E-06 | 1.63E-05 |
| 837 | 2 | L4 vs. M4 | 253404_at   | AT4G32840 | transducin family protein / WD-40 repeat family protein;(source:Araport11)                                                                                                                                                                                                                                                                                                                                                                                                                                                                                                                                                                                                                                 | 145.95  | 414.20  | 0.35 | 3.50E-06 | 2.70E-05 |
| 838 | 2 | L4 vs. M4 | 250788_at   | AT5G05570 | A member of Zrt- and Irt-related protein (ZIP) family. transcript is induced in response to zinc deficiency in the root and shoot. Expression is regulated by copper, but response to copper deficiency is detected only after three weeks of deficiency.                                                                                                                                                                                                                                                                                                                                                                                                                                                  | 95.40   | 272.48  | 0.35 | 5.75E-05 | 1.70E-04 |
| 839 | 2 | L4 vs. M4 | 260462_at   | AT1G10970 | TLC ATP/ADP transporter;(source:Araport11)                                                                                                                                                                                                                                                                                                                                                                                                                                                                                                                                                                                                                                                                 | 74.01   | 219.63  | 0.34 | 3.10E-06 | 2.47E-05 |
| 840 | 2 | L4 vs. M4 | 261767_s_at | AT1G15500 |                                                                                                                                                                                                                                                                                                                                                                                                                                                                                                                                                                                                                                                                                                            | 114.74  | 336.42  | 0.34 | 3.00E-07 | 6.20E-06 |



|     |   |           |                 |           |                                                                                                                                                                                                                                                                                                                                                                                                                                                                                                                                                                                                                                        |         |          |      |          |          |
|-----|---|-----------|-----------------|-----------|----------------------------------------------------------------------------------------------------------------------------------------------------------------------------------------------------------------------------------------------------------------------------------------------------------------------------------------------------------------------------------------------------------------------------------------------------------------------------------------------------------------------------------------------------------------------------------------------------------------------------------------|---------|----------|------|----------|----------|
| 841 | 2 | L4 vs. M4 | 262073_at       | AT1G59640 | A basic helix-loop-helix encoding gene (BIGPETAL, BPE) involved in the control of petal size. BPE is expressed via two mRNAs derived from an alternative splicing event. The BPEub (AT1G59640.1) transcript is expressed ubiquitously, whereas the BPEp (AT1G59640.2) transcript is preferentially expressed in petals. Plants that lack the petal-expressed variant BPEp have larger petals as a result of increased cell size. BPEp is positively regulated downstream of APETALA3, PISTILLATA, APETALA1 and PISTILLATA3 and is negatively regulated downstream of AGAMOUS. Encodes the D1 subunit of photosystem I reaction center. | 48.44   | 140.91   | 0.34 | 2.00E-07 | 5.51E-06 |
| 842 | 2 | L4 vs. M4 | 245006_at       | ATCG00340 |                                                                                                                                                                                                                                                                                                                                                                                                                                                                                                                                                                                                                                        | 4541.33 | 13400.47 | 0.34 | 7.03E-05 | 2.01E-04 |
| 843 | 2 | L4 vs. M4 | 264595_at       | AT1G04750 | Encodes vesicle-associated membrane protein 7B (VAMP7B, or VAMP721). Required for cell plate formation. VAMP721 interacts with KAT1 and KC1 K+ channels, affects channel gating and suppresses the K+ current within the physiological voltage range. Post-transcriptionally regulated by CRT1/2 under ER stress.                                                                                                                                                                                                                                                                                                                      | 168.67  | 516.18   | 0.33 | 2.50E-05 | 9.16E-05 |
| 844 | 2 | L4 vs. M4 | 246627_s_a<br>t | AT1G48860 | 5-enolpyruvylshikimate-3-phosphate synthase involved in shikimic acid biosynthesis. encodes a plastid lipoamide dehydrogenase, subunit of the pyruvate dehydrogenase complex which provides acetyl-CoA for de novo fatty acid biosynthesis. The gene is highly expressed in developing seeds.                                                                                                                                                                                                                                                                                                                                          | 449.09  | 1358.16  | 0.33 | 3.00E-07 | 6.20E-06 |
| 845 | 2 | L4 vs. M4 | 257895_at       | AT3G16950 | cysteine-rich/transmembrane domain PCC1-like protein;(source:Araport11)                                                                                                                                                                                                                                                                                                                                                                                                                                                                                                                                                                | 281.30  | 858.54   | 0.33 | 1.06E-05 | 4.97E-05 |
| 846 | 2 | L4 vs. M4 | 256617_at       | AT3G22240 | methionyl-tRNA synthetase;(source:Araport11)                                                                                                                                                                                                                                                                                                                                                                                                                                                                                                                                                                                           | 142.79  | 432.98   | 0.33 | 3.00E-07 | 6.20E-06 |
| 847 | 2 | L4 vs. M4 | 246018_at       | AT5G10695 | encodes for CP47, subunit of the photosystem II reaction center.                                                                                                                                                                                                                                                                                                                                                                                                                                                                                                                                                                       | 88.29   | 267.67   | 0.33 | 1.10E-06 | 1.44E-05 |
| 848 | 2 | L4 vs. M4 | 244972_at       | ATCG00680 |                                                                                                                                                                                                                                                                                                                                                                                                                                                                                                                                                                                                                                        | 93.73   | 281.31   | 0.33 | 5.43E-05 | 1.62E-04 |
| 849 | 2 | L4 vs. M4 | 257122_at       | AT3G20250 | Encodes a member of the Arabidopsis Pumilio (APUM) proteins containing PUF domain (eight repeats of approximately 36 amino acids each). PUF proteins regulate both mRNA stability and translation through sequence-specific binding to the 3 Prime UTR of target mRNA transcripts. APUM5 is involved in susceptibility to CMV and is not required for bacterial or fungal pathogen resistance although its expression is induced upon bacterial and fungal infection. It is involved in the osmotic, salt, and drought stress responses.                                                                                               | 38.32   | 121.19   | 0.32 | 1.00E-06 | 1.34E-05 |
| 850 | 2 | L4 vs. M4 | 254740_s_a      | AT4G13930 | Encodes a serine hydroxymethyltransferase maximally expressed in root. The gene encodes a putative transcription factor belongs to the abiotic stress-associated DREB A-6 clade. The mRNA is cell-to-cell mobile.                                                                                                                                                                                                                                                                                                                                                                                                                      | 464.06  | 1429.53  | 0.32 | 6.00E-07 | 9.91E-06 |
| 851 | 2 | L4 vs. M4 | 255926_at       | AT1G22190 | serine carboxypeptidase-like 48;(source:Araport11)                                                                                                                                                                                                                                                                                                                                                                                                                                                                                                                                                                                     | 35.13   | 111.70   | 0.31 | 2.00E-05 | 7.75E-05 |
| 852 | 2 | L4 vs. M4 | 252606_at       | AT3G45010 | One of two genes in Arabidopsis that encode a flavoprotein subunit of the mitochondrial succinate dehydrogenase complex. The mRNA is cell-to-cell mobile.                                                                                                                                                                                                                                                                                                                                                                                                                                                                              | 479.17  | 1568.18  | 0.31 | 5.00E-07 | 9.10E-06 |
| 853 | 2 | L4 vs. M4 | 247060_at       | AT5G66760 |                                                                                                                                                                                                                                                                                                                                                                                                                                                                                                                                                                                                                                        | 446.32  | 1439.11  | 0.31 | 1.26E-05 | 5.52E-05 |
| 854 | 2 | L4 vs. M4 | 262660_at       | AT1G14000 | Encodes a protein with similarity to members of the C1 subgroup of MAP kinase kinase kinases. Interacts physically with the receptor kinase BRL2/VH1 and appears to be involved in auxin and brassinosteroid signaling. The mRNA is cell-to-cell mobile. cysteine proteinase precursor-like protein/ dehydration stress-responsive gene (RD21). Has been shown to have peptide ligase activity and protease activity in vitro. RD21 is involved in immunity to the necrotrophic fungal pathogen Botrytis cinerea. Activity detected in root, leaf, flower and cell culture.                                                            | 178.64  | 597.71   | 0.30 | 3.00E-07 | 6.20E-06 |
| 855 | 2 | L4 vs. M4 | 245803_at       | AT1G47128 |                                                                                                                                                                                                                                                                                                                                                                                                                                                                                                                                                                                                                                        | 1957.37 | 6632.95  | 0.30 | 1.00E-07 | 3.36E-06 |

|     |   |           |            |           |                                                                                                                                                                                                                                                                                                                                                                                                                                                                                                                                                                                                                                                                                                                                                                                                                                                                                                                                                                                                                                                                                                                                                                                                                                                                                                                                                                                                                     |        |         |      |          |          |
|-----|---|-----------|------------|-----------|---------------------------------------------------------------------------------------------------------------------------------------------------------------------------------------------------------------------------------------------------------------------------------------------------------------------------------------------------------------------------------------------------------------------------------------------------------------------------------------------------------------------------------------------------------------------------------------------------------------------------------------------------------------------------------------------------------------------------------------------------------------------------------------------------------------------------------------------------------------------------------------------------------------------------------------------------------------------------------------------------------------------------------------------------------------------------------------------------------------------------------------------------------------------------------------------------------------------------------------------------------------------------------------------------------------------------------------------------------------------------------------------------------------------|--------|---------|------|----------|----------|
| 856 | 2 | L4 vs. M4 | 264851_at  | AT2G17290 | Encodes calcium dependent protein kinase 6 (CPK6), a member of the Arabidopsis CDPK gene family. CDPKs contain an intrinsic Ca <sup>2+</sup> -activation domain with four EF hand Ca <sup>2+</sup> -binding sites. CDPKs protein kinases have been proposed to function in multiple plant signal transduction pathways downstream of [Ca <sup>2+</sup> ] <sub>cyt</sub> elevations, thus transducing various physiological responses. CPK6 is expressed in both guard cells and mesophyll cells. Functions in guard cell ion channel regulation. ABA and Ca(2+) activation of slow-type anion channels and, interestingly, ABA activation of plasma membrane Ca(2+)-permeable channels were impaired in independent alleles of single and double cpk3cpk6 mutant guard cells. Furthermore, ABA- and Ca(2+)-induced stomatal closing were partially impaired in these cpk3cpk6 mutant alleles. The protein kinase CPK6 is shown in biochemical assays to be directly activated by elevations in calcium concentrations in the physiological range (Laanements et al., 2013 PlantPhys.; PMID: 23766366). These data correlate with the in vivo function of CPK6 in Ca <sup>2+</sup> and ABA activation of S-type anion channels (Mori et al., 2006 PLoS Biol.; PMID: 17032064) and the ability of CPK6 to mediate ABA activation of SLAC1 (Brandt et al., 2012 PNAS; PMID: 22689970).The mRNA is cell-to-cell mobile. | 44.24  | 149.60  | 0.30 | 6.00E-07 | 9.91E-06 |
| 857 | 2 | L4 vs. M4 | 258610_at  | AT3G02875 | Hydrolyzes amino acid conjugates of the plant growth regulator indole-3-acetic acid (IAA), including IAA-Leu and IAA-Phe. Uses Mg and Co ions as cofactors. Encodes a phloem-specific iron transporter that is essential for systemic iron signaling and redistribution of iron and cadmium. It loads iron into the phloem, facilitates iron recirculation from the xylem to the phloem, and regulates both shoot-to-root iron signaling and iron redistribution from mature to developing tissues.                                                                                                                                                                                                                                                                                                                                                                                                                                                                                                                                                                                                                                                                                                                                                                                                                                                                                                                 | 84.28  | 281.31  | 0.30 | 2.17E-05 | 8.21E-05 |
| 858 | 2 | L4 vs. M4 | 245296_at  | AT4G16370 | copper amine oxidase family protein;(source:Araport11)                                                                                                                                                                                                                                                                                                                                                                                                                                                                                                                                                                                                                                                                                                                                                                                                                                                                                                                                                                                                                                                                                                                                                                                                                                                                                                                                                              | 760.65 | 2528.09 | 0.30 | 6.00E-07 | 9.91E-06 |
| 859 | 2 | L4 vs. M4 | 254833_s_a | AT4G12280 |                                                                                                                                                                                                                                                                                                                                                                                                                                                                                                                                                                                                                                                                                                                                                                                                                                                                                                                                                                                                                                                                                                                                                                                                                                                                                                                                                                                                                     | 356.18 | 1219.51 | 0.29 | 1.00E-07 | 3.36E-06 |
| 860 | 2 | L4 vs. M4 | 254657_s_a | AT4G18220 | Drug/metabolite transporter superfamily protein;(source:Araport11)                                                                                                                                                                                                                                                                                                                                                                                                                                                                                                                                                                                                                                                                                                                                                                                                                                                                                                                                                                                                                                                                                                                                                                                                                                                                                                                                                  | 240.35 | 831.91  | 0.29 | 1.00E-07 | 3.36E-06 |
| 861 | 2 | L4 vs. M4 | 254543_at  | AT4G19810 | ChiC encodes a Class V chitinase that is a part of glycoside hydrolase family 18 based on CAZy groupings. It appears to primarily act as an exochitinase in vitro where it predominantly cleaves a chitobiose (GlcNAc) <sub>2</sub> residue from the non-reducing end of a chitin oligosaccharide. However, it shows some minor endochitinase activity in vitro, as well. A putative 24 amino-acid signal peptide may direct this protein to the secretory system and it has been detected in cell wall apoplastic fluid. RT-PCR experiments demonstrate that ChiC transcript levels are increased in response to abscisic acid, jasmonic acid, and NaCl stress. Microarray results also suggest that transcript levels rise in response to osmotic stress, two fungal pathogens, a bacterial pathogen, and the elicitor flagellin. The mRNA is cell-to-cell mobile.                                                                                                                                                                                                                                                                                                                                                                                                                                                                                                                                                | 43.16  | 151.10  | 0.29 | 2.90E-06 | 2.34E-05 |
| 862 | 2 | L4 vs. M4 | 265530_at  | AT2G06050 | Encodes a 12-oxophytodienoate reductase that is required for jasmonate biosynthesis. Mutants are male sterile and defective in pollen dehiscence. Shows activity towards 2,4,6-trinitrotoluene. CFA-Ile, CFA-Leu, CFA-Val, CFA-Met and CFA-Ala can restore the fertility of opr3 plants by inducing filament elongation and anther dehiscence.                                                                                                                                                                                                                                                                                                                                                                                                                                                                                                                                                                                                                                                                                                                                                                                                                                                                                                                                                                                                                                                                      | 327.67 | 1152.25 | 0.28 | 3.00E-07 | 6.20E-06 |
| 863 | 2 | L4 vs. M4 | 249688_at  | AT5G36160 | Encodes a cytosolic L-tyrosine aminotransferase. AtTAT2 exhibits much broader amino donor specificity than AtTAT1 and can use not only Tyr but also Phe, Trp, His, Met, Leu, Ala, Ser, Cys, Asp, Asn, Gln, and Arg as amino donors.                                                                                                                                                                                                                                                                                                                                                                                                                                                                                                                                                                                                                                                                                                                                                                                                                                                                                                                                                                                                                                                                                                                                                                                 | 26.60  | 95.02   | 0.28 | 3.00E-07 | 6.20E-06 |
| 864 | 2 | L4 vs. M4 | 258599_at  | AT3G04520 | Encodes a threonine aldolase, involved in threonine degradation to glycine. Expressed in vascular tissue through out the plant.                                                                                                                                                                                                                                                                                                                                                                                                                                                                                                                                                                                                                                                                                                                                                                                                                                                                                                                                                                                                                                                                                                                                                                                                                                                                                     | 188.00 | 698.03  | 0.27 | 2.00E-07 | 5.51E-06 |
| 865 | 2 | L4 vs. M4 | 252278_at  | AT3G49530 | Transcription factor that serves as a molecular link between cold signals and pathogen resistance responses. Undergoes proteolytic processing triggered by cold-induced changes in membrane fluidity.It relocates from the plasma membrane to the nucleus in response to ER stress. NAC062 is phosphorylated by SnRK2.8 at Thr-142.                                                                                                                                                                                                                                                                                                                                                                                                                                                                                                                                                                                                                                                                                                                                                                                                                                                                                                                                                                                                                                                                                 | 17.24  | 66.17   | 0.26 | 3.23E-05 | 1.09E-04 |
| 866 | 2 | L4 vs. M4 | 245757_at  | AT1G35140 | EXL1 is involved in the C-starvation response. Phenotypic changes of an exl1 loss of function mutant became evident only under corresponding experimental conditions. For example, the mutant showed diminished biomass production in a short-day/low light growth regime, impaired survival during extended night, and impaired survival of anoxia stress.                                                                                                                                                                                                                                                                                                                                                                                                                                                                                                                                                                                                                                                                                                                                                                                                                                                                                                                                                                                                                                                         | 30.63  | 123.61  | 0.25 | 2.00E-06 | 1.99E-05 |
| 867 | 2 | L4 vs. M4 | 260101_at  | AT1G73260 | Encodes a trypsin inhibitor involved in modulating programmed cell death in plant-pathogen interactions.                                                                                                                                                                                                                                                                                                                                                                                                                                                                                                                                                                                                                                                                                                                                                                                                                                                                                                                                                                                                                                                                                                                                                                                                                                                                                                            | 79.59  | 315.35  | 0.25 | 4.00E-07 | 7.54E-06 |

|     |   |               |            |           |                                                                                                                                                                                                                                                                                                                                                                                                                                                                                                                                      |         |         |        |          |          |
|-----|---|---------------|------------|-----------|--------------------------------------------------------------------------------------------------------------------------------------------------------------------------------------------------------------------------------------------------------------------------------------------------------------------------------------------------------------------------------------------------------------------------------------------------------------------------------------------------------------------------------------|---------|---------|--------|----------|----------|
| 868 | 2 | L4 vs. M4     | 251503_at  | AT3G59140 | member of MRP subfamily                                                                                                                                                                                                                                                                                                                                                                                                                                                                                                              | 172.80  | 680.62  | 0.25   | 2.00E-07 | 5.51E-06 |
| 869 | 2 | L4 vs. M4     | 251937_at  | AT3G53400 | peptide upstream protein;(source:Araport11)<br>chloroplast gene encoding a ribosomal protein L16, which is a constituent of 50S large ribosomal subunit                                                                                                                                                                                                                                                                                                                                                                              | 56.45   | 233.47  | 0.24   | 2.00E-07 | 5.51E-06 |
| 870 | 2 | L4 vs. M4     | 244983_at  | ATCG00790 | member of Fe(II) transporter isolog family                                                                                                                                                                                                                                                                                                                                                                                                                                                                                           | 318.33  | 1337.84 | 0.24   | 1.00E-03 | 1.69E-03 |
| 871 | 2 | L4 vs. M4     | 264574_at  | AT1G05300 | Pathogen-induced transcription factor. Binds W-box sequences in vitro. Forms protein complexes with itself and with WRKY40 and WRKY60. Coexpression with WRKY18 or WRKY60 made plants more susceptible to both P. syringae and B. cinerea. WRKY18, WRKY40, and WRKY60 have partially redundant roles in response to the hemibiotrophic bacterial pathogen Pseudomonas syringae and the necrotrophic fungal pathogen Botrytis cinerea, with WRKY18 playing a more important role than the other two. The mRNA is cell-to-cell mobile. | 87.65   | 381.66  | 0.23   | 1.00E-07 | 3.36E-06 |
| 872 | 2 | L4 vs. M4     | 261892_at  | AT1G80840 | Calcium-binding EF-hand family protein;(source:Araport11)                                                                                                                                                                                                                                                                                                                                                                                                                                                                            | 80.84   | 348.20  | 0.23   | 3.00E-07 | 6.20E-06 |
| 873 | 2 | L4 vs. M4     | 265460_at  | AT2G46600 | DUF1230 family protein (DUF1230);(source:Araport11)                                                                                                                                                                                                                                                                                                                                                                                                                                                                                  | 281.39  | 1219.42 | 0.23   | < 1e-07  | < 1e-07  |
| 874 | 2 | L4 vs. M4     | 246998_at  | AT5G67370 | Chloroplast encoded ribosomal protein S4                                                                                                                                                                                                                                                                                                                                                                                                                                                                                             | 38.70   | 164.96  | 0.23   | < 1e-07  | < 1e-07  |
| 875 | 2 | L4 vs. M4     | 245009_at  | ATCG00380 | alpha-amylase, putative / 1,4-alpha-D-glucan glucanohydrolase, putative, strong similarity to alpha-amylase Gl:7532799 from (Malus x domestica);contains Pfam profile PF00128: Alpha amylase, catalytic domain. Predicted to be secreted based on SignalP analysis.<br>Encodes photosystem II 5 kD protein subunit PSII-T. This is a plastid-encoded gene (PsbTc) which also has a nuclear-encoded paralog (PsbTn).                                                                                                                  | 88.04   | 386.72  | 0.23   | 2.90E-06 | 2.34E-05 |
| 876 | 2 | L4 vs. M4     | 261754_at  | AT1G76130 | S-adenosyl-L-methionine-dependent methyltransferases superfamily protein;(source:Araport11)                                                                                                                                                                                                                                                                                                                                                                                                                                          | 136.98  | 635.85  | 0.22   | < 1e-07  | < 1e-07  |
| 877 | 2 | L4 vs. M4     | 244973_at  | ATCG00690 | Encodes a mitochondrial ATPase involved in seed and silique development.                                                                                                                                                                                                                                                                                                                                                                                                                                                             | 34.80   | 155.84  | 0.22   | 5.50E-06 | 3.52E-05 |
| 878 | 2 | L4 vs. M4     | 266262_at  | AT2G27590 | PSII L protein                                                                                                                                                                                                                                                                                                                                                                                                                                                                                                                       | 28.79   | 140.21  | 0.21   | < 1e-07  | < 1e-07  |
| 879 | 2 | L4 vs. M4     | 249438_at  | AT5G40010 | Polyubiquitin gene containing 4 ubiquitin repeats.                                                                                                                                                                                                                                                                                                                                                                                                                                                                                   | 28.04   | 135.92  | 0.21   | 1.20E-06 | 1.50E-05 |
| 880 | 2 | L4 vs. M4     | 245021_at  | ATCG00560 | SGNH hydrolase-type esterase superfamily protein;(source:Araport11)                                                                                                                                                                                                                                                                                                                                                                                                                                                                  | 672.90  | 3450.89 | 0.19   | < 1e-07  | < 1e-07  |
| 881 | 2 | L4 vs. M4     | 255459_at  | AT4G02890 | Subtilisin-like serine endopeptidase family protein;(source:Araport11)                                                                                                                                                                                                                                                                                                                                                                                                                                                               | 907.11  | 4734.62 | 0.19   | 2.00E-07 | 5.51E-06 |
| 882 | 2 | L4 vs. M4     | 262680_at  | AT1G75880 | Senescence-associated gene 12 (SAG12) encoding a cysteine protease influenced by cytokinin, auxin, and sugars. Localized to special vacuole found during senescence called senescence associated vacuoles which are different from central vacuole in the tonoplast composition and pH. Expression of the gene is affected by multiple stresses. Knockout and overexpression lines show no obvious phenotypes.                                                                                                                       | 81.67   | 444.08  | 0.18   | < 1e-07  | < 1e-07  |
| 883 | 2 | L4 vs. M4     | 245088_at  | AT2G39850 | OBP3-responsive protein 1;(source:Araport11)<br>Encodes AP2C1. Belongs to the clade B of the PP2C-superfamily. Acts as a MAPK phosphatase that negatively regulates MPK4 and MPK6.                                                                                                                                                                                                                                                                                                                                                   | 74.99   | 462.22  | 0.16   | < 1e-07  | < 1e-07  |
| 884 | 2 | L4 vs. M4     | 248918_at  | AT5G45890 | putative cytochrome P450 The mRNA is cell-to-cell mobile.                                                                                                                                                                                                                                                                                                                                                                                                                                                                            | 25.88   | 158.86  | 0.16   | < 1e-07  | 3.36E-06 |
| 885 | 2 | L4 vs. M4     | 253643_at  | AT4G29780 | DUF1685 family protein;(source:Araport11)                                                                                                                                                                                                                                                                                                                                                                                                                                                                                            | 28.38   | 216.22  | 0.13   | < 1e-07  | < 1e-07  |
| 886 | 2 | L4 vs. M4     | 248270_at  | AT5G53450 | Encodes a nitrile-specifier protein NSP4. NSP4 is one out of five (At3g16400/NSP1, At2g33070/NSP2, At3g16390/NSP3, At3g16410/NSP4 and At5g48180/NSP5) A. thaliana epithiospecifier protein (ESP) homologues that promote simple nitrile, but not epithionitrile or thiocyanate formation. The mRNA is cell-to-cell mobile.                                                                                                                                                                                                           | 140.09  | 1305.69 | 0.11   | < 1e-07  | < 1e-07  |
| 887 | 2 | L4 vs. M4     | 266834_s_a | AT2G30020 | encodes a chloroplast ribosomal protein L20, a constituent of the large subunit of the ribosomal complex                                                                                                                                                                                                                                                                                                                                                                                                                             | 144.50  | 1428.33 | 0.10   | < 1e-07  | < 1e-07  |
| 888 | 2 | L4 vs. M4     | 258063_at  | AT3G14620 | Encodes a 6.8-kDa protein of the small ribosomal subunit.                                                                                                                                                                                                                                                                                                                                                                                                                                                                            | 39.83   | 435.46  | 0.09   | < 1e-07  | < 1e-07  |
| 889 | 2 | L4 vs. M4     | 263972_at  | AT2G42760 | Myrosinase (thioglucoside glucosylhydrolase) gene involved in glucosinolate metabolism. The mRNA is cell-to-cell mobile.                                                                                                                                                                                                                                                                                                                                                                                                             | 34.72   | 389.41  | 0.09   | < 1e-07  | < 1e-07  |
| 890 | 2 | L4 vs. M4     | 259381_s_a | AT3G16410 | Late embryogenesis abundant protein (LEA) family protein;(source:Araport11)                                                                                                                                                                                                                                                                                                                                                                                                                                                          | 57.54   | 838.08  | 0.07   | < 1e-07  | 3.36E-06 |
| 891 | 2 | L4 vs. M4     | 244970_at  | ATCG00660 | GDSL-motif esterase/acyltransferase/lipase. Enzyme group with broad substrate specificity that may catalyze acyltransfer or hydrolase reactions with lipid and non-lipid substrates. Mutants are defective in cuticle formation with reduced sepal cuticle ridge formation.                                                                                                                                                                                                                                                          | 50.44   | 775.54  | 0.07   | < 1e-07  | 3.36E-06 |
| 892 | 2 | L4 vs. M4     | 244986_at  | ATCG00820 | H[+]-ATPase 6;(source:Araport11)                                                                                                                                                                                                                                                                                                                                                                                                                                                                                                     | 102.96  | 1702.98 | 0.06   | 2.00E-07 | 5.51E-06 |
| 893 | 3 | F2-3 vs. L2-3 | 246880_s_a | AT5G25980 | Encodes a cis-cinnamic acid responsive gene that is a member of the major latex protein-like gene family and plays a role in promoting vegetative growth and delaying senescence.                                                                                                                                                                                                                                                                                                                                                    | 5041.14 | 20.91   | 241.10 | < 1e-07  | < 1e-07  |
| 894 | 3 | F2-3 vs. L2-3 | 248227_at  | AT5G53820 | cell-to-cell mobile.                                                                                                                                                                                                                                                                                                                                                                                                                                                                                                                 | 1371.93 | 15.02   | 91.34  | < 1e-07  | < 1e-07  |
| 895 | 3 | F2-3 vs. L2-3 | 246687_at  | AT5G33370 |                                                                                                                                                                                                                                                                                                                                                                                                                                                                                                                                      | 1648.20 | 22.61   | 72.89  | < 1e-07  | < 1e-07  |
| 896 | 3 | F2-3 vs. L2-3 | 265552_at  | AT2G07560 |                                                                                                                                                                                                                                                                                                                                                                                                                                                                                                                                      | 1117.09 | 17.18   | 65.02  | < 1e-07  | < 1e-07  |
| 897 | 3 | F2-3 vs. L2-3 | 266353_at  | AT2G01520 |                                                                                                                                                                                                                                                                                                                                                                                                                                                                                                                                      | 2765.39 | 44.57   | 62.05  | 3.60E-06 | 5.76E-05 |

|     |   |               |                         |           |                                                                                                                                                                                                                                                                                                                                                                      |         |        |       |          |          |
|-----|---|---------------|-------------------------|-----------|----------------------------------------------------------------------------------------------------------------------------------------------------------------------------------------------------------------------------------------------------------------------------------------------------------------------------------------------------------------------|---------|--------|-------|----------|----------|
| 898 | 3 | F2-3 vs. L2-3 | 261943_at<br>245928_s_a | AT1G80660 | H[+]-ATPase 9;(source:Araport11)<br>encodes an acid phosphatase similar to soybean vegetative storage proteins. Gene expression is induced by wounding and jasmonic acid.                                                                                                                                                                                            | 920.91  | 16.24  | 56.71 | < 1e-07  | < 1e-07  |
| 899 | 3 | F2-3 vs. L2-3 | t                       | AT5G24780 |                                                                                                                                                                                                                                                                                                                                                                      | 2992.69 | 69.62  | 42.98 | < 1e-07  | < 1e-07  |
| 900 | 3 | F2-3 vs. L2-3 | 245010_at               | ATCG00420 | Encodes NADH dehydrogenase subunit J. Its transcription is increased upon sulfur depletion. Floral homeotic gene encoding a MADS domain transcription factor. Required for the specification of petal and stamen identities.                                                                                                                                         | 9425.33 | 220.06 | 42.83 | < 1e-07  | < 1e-07  |
| 901 | 3 | F2-3 vs. L2-3 | 246072_at               | AT5G20240 | Encodes a cytochrome p450 enzyme that catalyzes the initial conversion of aldoximes to thiohydroximates in the synthesis of glucosinolates not derived from tryptophan. Also has a role in auxin homeostasis.                                                                                                                                                        | 596.07  | 15.84  | 37.63 | < 1e-07  | < 1e-07  |
| 902 | 3 | F2-3 vs. L2-3 | 254687_at               | AT4G13770 | VANGUARD-like protein;(source:Araport11)                                                                                                                                                                                                                                                                                                                             | 1178.82 | 31.78  | 37.10 | < 1e-07  | < 1e-07  |
| 903 | 3 | F2-3 vs. L2-3 | 251258_at               | AT3G62170 | H[+]-ATPase 8;(source:Araport11)                                                                                                                                                                                                                                                                                                                                     | 2579.65 | 88.77  | 29.06 | 9.35E-04 | 3.04E-03 |
| 904 | 3 | F2-3 vs. L2-3 | 252820_at               | AT3G42640 | Encodes flavanone 3-hydroxylase that is coordinately expressed with chalcone synthase and chalcone isomerases. Regulates flavonoid biosynthesis. Not responsive to auxin or ethylene stimulus (qRT-PCR).                                                                                                                                                             | 3041.01 | 107.96 | 28.17 | 3.22E-05 | 2.62E-04 |
| 905 | 3 | F2-3 vs. L2-3 | 252123_at               | AT3G51240 | putative beta-galactosidase (BGAL11 gene)                                                                                                                                                                                                                                                                                                                            | 656.75  | 23.77  | 27.63 | 5.00E-07 | 1.44E-05 |
| 906 | 3 | F2-3 vs. L2-3 | 253226_at               | AT4G35010 | Chloroplast lipoxygenase required for wound-induced jasmonic acid accumulation in Arabidopsis. Mutants are resistant to Staphylococcus aureus and accumulate salicylic acid upon infection. CFA-Leu, CFA-Val, CFA-Met and CFA-Ala can induce the expression of LOX2. The mRNA is cell-to-cell mobile.                                                                | 604.49  | 22.01  | 27.47 | 2.70E-06 | 4.78E-05 |
| 907 | 3 | F2-3 vs. L2-3 | 252618_at               | AT3G45140 | Sucrose transporter, expressed in pollen tubes.                                                                                                                                                                                                                                                                                                                      | 535.73  | 19.96  | 26.84 | < 1e-07  | < 1e-07  |
| 908 | 3 | F2-3 vs. L2-3 | 262463_at               | AT1G50310 | Pollen Ole e 1 allergen and extensin family protein;(source:Araport11)                                                                                                                                                                                                                                                                                               | 585.53  | 24.43  | 23.97 | < 1e-07  | < 1e-07  |
| 909 | 3 | F2-3 vs. L2-3 | 260888_at               | AT1G29140 | Pollen Ole e 1 allergen and extensin family protein;(source:Araport11)                                                                                                                                                                                                                                                                                               | 791.17  | 34.86  | 22.70 | 2.60E-06 | 4.67E-05 |
| 910 | 3 | F2-3 vs. L2-3 | 249939_at               | AT5G22430 | SKU5 similar 12;(source:Araport11)                                                                                                                                                                                                                                                                                                                                   | 326.74  | 14.49  | 22.54 | < 1e-07  | < 1e-07  |
| 911 | 3 | F2-3 vs. L2-3 | 265080_at               | AT1G55570 | Uncharacterized protein family (UPF0497);(source:Araport11)                                                                                                                                                                                                                                                                                                          | 420.13  | 19.97  | 21.04 | 4.86E-05 | 3.55E-04 |
| 912 | 3 | F2-3 vs. L2-3 | 254104_at               | AT4G25040 | Encodes an anther-specific proline-rich protein.                                                                                                                                                                                                                                                                                                                     | 416.28  | 19.84  | 20.98 | < 1e-07  | < 1e-07  |
| 913 | 3 | F2-3 vs. L2-3 | 245842_at               | AT1G58430 | Encodes glutathione transferase belonging to the phi class of GSTs. Naming convention according to Wagner et al. (2002).                                                                                                                                                                                                                                             | 264.00  | 12.60  | 20.96 | < 1e-07  | < 1e-07  |
| 914 | 3 | F2-3 vs. L2-3 | 258851_at               | AT3G03190 | S-adenosyl-L-homocysteine (SAH) hydrolase 2;(source:Araport11)                                                                                                                                                                                                                                                                                                       | 421.92  | 20.21  | 20.87 | < 1e-07  | < 1e-07  |
| 915 | 3 | F2-3 vs. L2-3 | 257173_at               | AT3G23810 | RNA-binding protein;(source:Araport11)                                                                                                                                                                                                                                                                                                                               | 3763.75 | 181.62 | 20.72 | < 1e-07  | 4.57E-06 |
| 916 | 3 | F2-3 vs. L2-3 | 256638_at               | AT3G19090 | Encodes a putative beta-carbonic anhydrase betaCA1. Together with betaCA4 (At1g70410) regulates CO2-controlled stomatal movements in guard cells, as well as attenuates immunity. Differential CA gene expression in response to changing atmospheric CO2 conditions contribute to altered disease resistance levels. Activated by OXS2 under the treatment of salt. | 804.07  | 39.30  | 20.46 | < 1e-07  | < 1e-07  |
| 917 | 3 | F2-3 vs. L2-3 | 259161_at               | AT3G01500 | Encodes a member of the ribonuclease T2 family that responds to inorganic phosphate starvation, and inhibits production of anthocyanin. Also involved in wound-induced signaling independent of jasmonic acid. Its expression is responsive to both phosphate (Pi) and phosphite (Phi) in roots.                                                                     | 563.57  | 28.45  | 19.81 | < 1e-07  | < 1e-07  |
| 918 | 3 | F2-3 vs. L2-3 | 266743_at               | AT2G02990 | SKU5 similar 11;(source:Araport11)                                                                                                                                                                                                                                                                                                                                   | 1968.32 | 100.15 | 19.65 | 7.80E-06 | 1.01E-04 |
| 919 | 3 | F2-3 vs. L2-3 | 256955_at               | AT3G13390 | NOD26-like intrinsic protein 4;(source:Araport11)                                                                                                                                                                                                                                                                                                                    | 706.01  | 36.93  | 19.12 | 1.17E-05 | 1.31E-04 |
| 920 | 3 | F2-3 vs. L2-3 | 249584_s_a              | AT5G37810 | Late embryogenesis abundant protein (LEA) family protein;(source:Araport11)                                                                                                                                                                                                                                                                                          | 216.14  | 11.53  | 18.74 | < 1e-07  | < 1e-07  |
| 921 | 3 | F2-3 vs. L2-3 | 254716_at               | AT4G13560 | Encodes a bifunctional enzyme, wax ester synthase (WS) and diacylglycerol acyltransferase (DGAT). In vitro assay indicated a ratio of 10.9 between its WS and DGAT activities. Both mutant and in vivo expression/analysis in yeast studies indicated a role in wax biosynthesis.                                                                                    | 666.23  | 40.53  | 16.44 | < 1e-07  | < 1e-07  |
| 922 | 3 | F2-3 vs. L2-3 | 249614_at               | AT5G37300 | Encodes a member of the CC-type glutaredoxin (ROXY) family that has been shown to interact with the transcription factor TGA2 and suppress ORA59 promoter activity.                                                                                                                                                                                                  | 191.24  | 11.72  | 16.32 | < 1e-07  | < 1e-07  |
| 923 | 3 | F2-3 vs. L2-3 | 249996_at               | AT5G18600 | Pectin lyase-like superfamily protein;(source:Araport11)                                                                                                                                                                                                                                                                                                             | 305.23  | 19.17  | 15.92 | < 1e-07  | < 1e-07  |
| 924 | 3 | F2-3 vs. L2-3 | 258639_at               | AT3G07820 | Rubisco activase, a nuclear-encoded chloroplast protein that consists of two isoforms arising from alternative splicing in most plants. Required for the light activation of rubisco. Involved in jasmonate-induced leaf senescence.                                                                                                                                 | 449.66  | 29.77  | 15.10 | 1.69E-04 | 8.51E-04 |
| 925 | 3 | F2-3 vs. L2-3 | 245061_at               | AT2G39730 | ADF10 is an actin-depolymerizing factor that preferentially binds ADP-G-actin and inhibits G-actin nucleotide exchange. ADF10 promotes actin turnover in pollen, regulating organization of actin filaments and vesicle trafficking during pollen tube growth.                                                                                                       | 822.31  | 54.83  | 15.00 | < 1e-07  | < 1e-07  |
| 926 | 3 | F2-3 vs. L2-3 | 248367_at               | AT5G52360 |                                                                                                                                                                                                                                                                                                                                                                      | 550.59  | 38.21  | 14.41 | 3.10E-06 | 5.20E-05 |

|     |   |               |            |           |                                                                                                                                                                                                                                                                                                                                                                                                                                                                                                                                                                                                    |          |        |       |          |          |
|-----|---|---------------|------------|-----------|----------------------------------------------------------------------------------------------------------------------------------------------------------------------------------------------------------------------------------------------------------------------------------------------------------------------------------------------------------------------------------------------------------------------------------------------------------------------------------------------------------------------------------------------------------------------------------------------------|----------|--------|-------|----------|----------|
| 927 | 3 | F2-3 vs. L2-3 | 245465_at  | AT4G16590 | encodes a gene similar to cellulose synthase                                                                                                                                                                                                                                                                                                                                                                                                                                                                                                                                                       | 231.55   | 16.25  | 14.25 | < 1e-07  | < 1e-07  |
| 928 | 3 | F2-3 vs. L2-3 | 253083_at  | AT4G36250 | Encodes a putative aldehyde dehydrogenase. The gene is not responsive to osmotic stress and is expressed constitutively at a low level in plantlets and root cultures.                                                                                                                                                                                                                                                                                                                                                                                                                             | 421.58   | 29.60  | 14.24 | < 1e-07  | < 1e-07  |
| 929 | 3 | F2-3 vs. L2-3 | 252607_at  | AT3G44990 | Encodes a xyloglucan endotransglycosylase/hydrolase. Protein sequence and phylogenetic analysis indicates that this enzyme resides in Group III-A of the XTH family, with high similarity to <i>Tropaeolum majus</i> (nasturtium) xyloglucanase 1 (TmNXG1). Enzyme kinetic analysis indicates predominant xyloglucan endo-hydrolase activity (EC 3.2.1.151) with only limited potential to act as a xyloglucan endo-transglycosylase (EC 2.4.1.207).                                                                                                                                               | 176.74   | 12.53  | 14.10 | < 1e-07  | < 1e-07  |
| 930 | 3 | F2-3 vs. L2-3 | 267213_at  | AT2G44120 | Ribosomal protein L30/L7 family protein;(source:Araport11)                                                                                                                                                                                                                                                                                                                                                                                                                                                                                                                                         | 259.80   | 18.74  | 13.86 | < 1e-07  | < 1e-07  |
| 931 | 3 | F2-3 vs. L2-3 | 252863_at  | AT4G39800 | ** Referred to as MIPS2 in Mitsuhashi et al 2008. myo-inositol-1-phosphate synthase isoform 1. Expressed in leaf, root and silique. Immunolocalization experiments with an antibody recognizing MIPS1, MIPS2, and MIPS3 showed endosperm localization.                                                                                                                                                                                                                                                                                                                                             | 1119.49  | 81.13  | 13.80 | < 1e-07  | 4.57E-06 |
| 932 | 3 | F2-3 vs. L2-3 | 248714_at  | AT5G48140 | Pectin lyase-like superfamily protein;(source:Araport11)                                                                                                                                                                                                                                                                                                                                                                                                                                                                                                                                           | 2621.64  | 190.85 | 13.74 | 2.43E-05 | 2.16E-04 |
| 933 | 3 | F2-3 vs. L2-3 | 265405_at  | AT2G16750 | kinase with adenine nucleotide alpha hydrolases-like domain-containing protein;(source:Araport11)                                                                                                                                                                                                                                                                                                                                                                                                                                                                                                  | 213.83   | 15.83  | 13.51 | 4.00E-07 | 1.25E-05 |
| 934 | 3 | F2-3 vs. L2-3 | 247538_at  | AT5G61700 | ABC2 homolog 16;(source:Araport11)<br>Encodes an expansin. Naming convention from the Expansin Working Group (Kende et al, 2004. Plant Mol Bio)                                                                                                                                                                                                                                                                                                                                                                                                                                                    | 544.15   | 40.90  | 13.30 | < 1e-07  | < 1e-07  |
| 935 | 3 | F2-3 vs. L2-3 | 258003_at  | AT3G29030 | ABC2 homolog 15;(source:Araport11)                                                                                                                                                                                                                                                                                                                                                                                                                                                                                                                                                                 | 553.31   | 42.15  | 13.13 | < 1e-07  | < 1e-07  |
| 936 | 3 | F2-3 vs. L2-3 | 247537_s_a | AT5G61690 | Calcium-dependent lipid-binding (CaLB domain) family protein;(source:Araport11)                                                                                                                                                                                                                                                                                                                                                                                                                                                                                                                    | 360.15   | 27.94  | 12.89 | 1.10E-06 | 2.61E-05 |
| 937 | 3 | F2-3 vs. L2-3 | 258591_at  | AT3G04360 | Profilin is a low-molecular weight, actin monomer-binding protein that regulates the organization of actin cytoskeleton in eukaryotes, including higher plants. PRF4 and PRF5 are late pollen-specific and are not detectable in other cell types of the plant body including microspores and root hairs. Immunocytochemical studies at the subcellular level reveal that both the constitutive and pollen-specific profilins are abundant in the cytoplasm. In vegetative cell types, such as root apical cells, profilins showed localization to nuclei in addition to the cytoplasmic staining. | 427.74   | 33.37  | 12.82 | < 1e-07  | < 1e-07  |
| 938 | 3 | F2-3 vs. L2-3 | 253725_at  | AT4G29340 | Pathogen-induced transcription factor. Binds W-box sequences in vitro. Forms protein complexes with itself and with WRKY40 and WRKY60. Coexpression with WRKY18 or WRKY60 made plants more susceptible to both <i>P. syringae</i> and <i>B. cinerea</i> . WRKY18, WRKY40, and WRKY60 have partially redundant roles in response to the hemibiotrophic bacterial pathogen <i>Pseudomonas syringae</i> and the necrotrophic fungal pathogen <i>Botrytis cinerea</i> , with WRKY18 playing a more important role than the other two. The mRNA is cell-to-cell mobile.                                 | 705.97   | 55.39  | 12.74 | 3.00E-07 | 1.05E-05 |
| 939 | 3 | F2-3 vs. L2-3 | 261892_at  | AT1G80840 | Encodes profilin 5, originally named profilin 4 (PRO4/PFN4). Low-molecular weight, actin monomer-binding protein that regulates the organization of actin cytoskeleton. Pollen-specific plant profilin present predominantly in mature pollen and growing pollen tubes.                                                                                                                                                                                                                                                                                                                            | 474.48   | 37.38  | 12.70 | < 1e-07  | < 1e-07  |
| 940 | 3 | F2-3 vs. L2-3 | 266697_at  | AT2G19770 | Pectin lyase-like superfamily protein;(source:Araport11)                                                                                                                                                                                                                                                                                                                                                                                                                                                                                                                                           | 260.22   | 20.63  | 12.62 | 5.00E-07 | 1.44E-05 |
| 941 | 3 | F2-3 vs. L2-3 | 258686_at  | AT3G07840 | Encodes a protein which was originally thought to be part of photosystem II but its wheat homolog was later shown to encode for subunit K of NADH dehydrogenase.                                                                                                                                                                                                                                                                                                                                                                                                                                   | 847.44   | 67.34  | 12.59 | 2.00E-07 | 7.75E-06 |
| 942 | 3 | F2-3 vs. L2-3 | 245011_at  | ATCG00430 | Putative poly(A) binding protein May therefore function in posttranscriptional regulation, including mRNA turnover and translational initiation. Expression detected only in floral organs.                                                                                                                                                                                                                                                                                                                                                                                                        | 453.54   | 36.11  | 12.56 | < 1e-07  | < 1e-07  |
| 943 | 3 | F2-3 vs. L2-3 | 264208_at  | AT1G22760 | Putative lysine decarboxylase family protein;(source:Araport11)                                                                                                                                                                                                                                                                                                                                                                                                                                                                                                                                    | 242.70   | 19.49  | 12.45 | < 1e-07  | < 1e-07  |
| 944 | 3 | F2-3 vs. L2-3 | 265547_at  | AT2G28305 | PSII L protein                                                                                                                                                                                                                                                                                                                                                                                                                                                                                                                                                                                     | 553.71   | 45.27  | 12.23 | < 1e-07  | < 1e-07  |
| 945 | 3 | F2-3 vs. L2-3 | 244964_at  | ATCG00560 | Encodes a gene whose sequence is similar to ferredoxin dependent glutamate synthase (Fd-GOGAT). Expression in leaves is induced by light and sucrose. Proposed to be involved in photorespiration and nitrogen assimilation. The mRNA is cell-to-cell mobile.                                                                                                                                                                                                                                                                                                                                      | 10690.31 | 877.67 | 12.18 | 1.14E-05 | 1.29E-04 |
| 946 | 3 | F2-3 vs. L2-3 | 245701_at  | AT5G04140 | Floral homeotic gene encoding a MADS domain protein homologous to SRF transcription factors. Specifies floral meristem and sepal identity. Required for the transcriptional activation of AGAMOUS. Interacts with LEAFY. Binds to promoter and regulates the expression of flowering time genes SVP, SOC1 and AGL24.                                                                                                                                                                                                                                                                               | 218.40   | 17.98  | 12.15 | < 1e-07  | < 1e-07  |
| 947 | 3 | F2-3 vs. L2-3 | 259372_at  | AT1G69120 |                                                                                                                                                                                                                                                                                                                                                                                                                                                                                                                                                                                                    | 200.77   | 16.59  | 12.10 | < 1e-07  | < 1e-07  |

|     |   |               |                 |           |                                                                                                                                                                                                                                                                                                                                                                                                                                                                                                                             |         |        |       |          |          |
|-----|---|---------------|-----------------|-----------|-----------------------------------------------------------------------------------------------------------------------------------------------------------------------------------------------------------------------------------------------------------------------------------------------------------------------------------------------------------------------------------------------------------------------------------------------------------------------------------------------------------------------------|---------|--------|-------|----------|----------|
| 948 | 3 | F2-3 vs. L2-3 | 262717_s_a      | AT1G16410 | member of CYP79F The mRNA is cell-to-cell mobile.<br>Encodes a protein with similarity to flavonol synthases that is involved in the detoxification polycyclic aromatic hydrocarbons. One of 4 paralogs encoding a 2-oxoglutarate/Fe(II)-dependent oxygenases that hydroxylates JA to 12-OH-JA.                                                                                                                                                                                                                             | 153.91  | 12.74  | 12.08 | < 1e-07  | < 1e-07  |
| 949 | 3 | F2-3 vs. L2-3 | 250793_at       | AT5G05600 | CCH protein belongs to a family of eukaryotic proteins that participate in intracellular copper homeostasis by delivering this metal to the secretory pathway; mainly located along the vascular bundles of senescing leaves and petioles as well as in stem sieve elements; hypothesized to have a role in copper mobilization from decaying organs towards reproductive structures, as a result of metalloprotein breakdown. The plant-specific C-terminal domain of the CCH protein forms amyloid-like fibrils in vitro. | 947.71  | 82.74  | 11.45 | 1.00E-06 | 2.42E-05 |
| 950 | 3 | F2-3 vs. L2-3 | 251733_at       | AT3G56240 | Encodes a component of the fatty acid elongation machinery required for C28 to C30 fatty acid elongation. It does not require the acyltransferase catalytic site for biological function.                                                                                                                                                                                                                                                                                                                                   | 1467.82 | 130.92 | 11.21 | 5.09E-04 | 1.91E-03 |
| 951 | 3 | F2-3 vs. L2-3 | 254122_at       | AT4G24510 | Major facilitator superfamily protein;(source:Araport11)                                                                                                                                                                                                                                                                                                                                                                                                                                                                    | 182.55  | 16.37  | 11.15 | < 1e-07  | < 1e-07  |
| 952 | 3 | F2-3 vs. L2-3 | 251916_at       | AT3G53960 | S-adenosyl-L-methionine-dependent methyltransferases superfamily protein;(source:Araport11)                                                                                                                                                                                                                                                                                                                                                                                                                                 | 161.99  | 14.55  | 11.13 | < 1e-07  | < 1e-07  |
| 953 | 3 | F2-3 vs. L2-3 | 252140_at       | AT3G51070 | Related to Cys2/His2-type zinc-finger proteins found in higher plants. Compensated for a subset of calcineurin deficiency in yeast. Salt tolerance produced by ZAT10 appeared to be partially dependent on ENA1/PMR2, a P-type ATPase required for Li+ and Na+ efflux in yeast. The protein is localized to the nucleus, acts as a transcriptional repressor and is responsive to chitin oligomers.                                                                                                                         | 163.66  | 14.71  | 11.12 | < 1e-07  | < 1e-07  |
| 954 | 3 | F2-3 vs. L2-3 | 261648_at       | AT1G27730 | Also involved in response to photooxidative stress.                                                                                                                                                                                                                                                                                                                                                                                                                                                                         | 293.67  | 26.53  | 11.07 | 1.00E-06 | 2.42E-05 |
| 955 | 3 | F2-3 vs. L2-3 | 247162_at       | AT5G65730 | xyloglucan endotransglucosylase/hydrolase 6;(source:Araport11)<br>Encodes lipoxygenase5 (LOX5). LOX5 activity in roots facilitates green peach aphid colonization of Arabidopsis foliage by promoting green peach aphid feeding from sieve element and water consumption from xylem.                                                                                                                                                                                                                                        | 165.90  | 15.30  | 10.84 | < 1e-07  | < 1e-07  |
| 956 | 3 | F2-3 vs. L2-3 | 258445_at       | AT3G22400 | Heavy metal associated domain containing protein involved in plant immunity. Mutants show an increase in root length under NO stress and reduction in root length under H2O2 stress conditions. Mutants show increases in defense responses to pathogens including hypersensitive lesions, increased resistance and induction of SAR genes.                                                                                                                                                                                 | 159.72  | 14.78  | 10.81 | < 1e-07  | < 1e-07  |
| 957 | 3 | F2-3 vs. L2-3 | 245749_at       | AT1G51090 | Encodes a protein with biochemical, structural, and biophysical characteristics of a NEET protein. It plays a key role in plant development, senescence, reactive oxygen homeostasis, and Fe metabolism.                                                                                                                                                                                                                                                                                                                    | 182.84  | 16.95  | 10.79 | < 1e-07  | < 1e-07  |
| 958 | 3 | F2-3 vs. L2-3 | 248377_at       | AT5G51720 | member of Plasma membrane H+-ATPase family                                                                                                                                                                                                                                                                                                                                                                                                                                                                                  | 489.84  | 45.88  | 10.68 | < 1e-07  | < 1e-07  |
| 959 | 3 | F2-3 vs. L2-3 | 247902_at       | AT5G57350 | Encodes PAL1, a phenylalanine ammonia-lyase. Arabidopsis has four PALs: AT2G37040 (PAL1), AT3G53260 (PAL2), AT5G04230 (PAL3) and AT3G10340 (PAL4).                                                                                                                                                                                                                                                                                                                                                                          | 385.97  | 36.42  | 10.60 | 3.00E-07 | 1.05E-05 |
| 960 | 3 | F2-3 vs. L2-3 | 263845_at       | AT2G37040 | encodes a microbody NAD-dependent malate dehydrogenase encodes an peroxisomal NAD-malate dehydrogenase that is involved in fatty acid beta-oxidation through providing NAD to the process of converting fatty acyl CoA to acetyl CoA.                                                                                                                                                                                                                                                                                       | 170.52  | 16.34  | 10.43 | 4.00E-07 | 1.25E-05 |
| 961 | 3 | F2-3 vs. L2-3 | 250498_at       | AT5G09660 | Encodes a zinc transporter ZIF2. Expression of ZIF2 is regulated by alternative splicing.                                                                                                                                                                                                                                                                                                                                                                                                                                   | 339.34  | 32.52  | 10.43 | < 1e-07  | 4.57E-06 |
| 962 | 3 | F2-3 vs. L2-3 | 265768_at       | AT2G48020 | Dormancy/auxin associated family protein;(source:Araport11)                                                                                                                                                                                                                                                                                                                                                                                                                                                                 | 807.09  | 77.67  | 10.39 | < 1e-07  | < 1e-07  |
| 963 | 3 | F2-3 vs. L2-3 | 249048_at       | AT5G44300 | Pectin lyase-like superfamily protein;(source:Araport11)                                                                                                                                                                                                                                                                                                                                                                                                                                                                    | 301.98  | 29.33  | 10.30 | 2.00E-07 | 7.75E-06 |
| 964 | 3 | F2-3 vs. L2-3 | 250631_at       | AT5G07430 | encodes allene oxide cyclase. One of four genes in Arabidopsis that encode this enzyme, which catalyzes an essential step in jasmonic acid biosynthesis. Gene expression is induced during senescence, a process that involves jasmonic acid signalling pathway. The mRNA is cell-to-cell mobile.                                                                                                                                                                                                                           | 231.28  | 22.48  | 10.29 | 6.94E-04 | 2.41E-03 |
| 965 | 3 | F2-3 vs. L2-3 | 257641_s_a<br>t | AT3G25760 | Encodes a member of the Arabidopsis LIM proteins: a family of actin bundlers with distinct expression patterns. WLIM1, WLIM2a, and WLIM2b are widely expressed, whereas PLIM2a, PLIM2b, and PLIM2c are predominantly expressed in pollen. Regulates actin cytoskeleton organization.                                                                                                                                                                                                                                        | 2696.20 | 277.14 | 9.73  | < 1e-07  | < 1e-07  |
| 966 | 3 | F2-3 vs. L2-3 | 266918_at       | AT2G45800 | Heat shock protein 70 (Hsp 70) family protein;(source:Araport11)                                                                                                                                                                                                                                                                                                                                                                                                                                                            | 187.59  | 19.39  | 9.68  | 3.00E-07 | 1.05E-05 |
| 967 | 3 | F2-3 vs. L2-3 | 258979_at       | AT3G09440 | encodes a exopolysaccharonase.                                                                                                                                                                                                                                                                                                                                                                                                                                                                                              | 1105.44 | 115.69 | 9.56  | 4.00E-07 | 1.25E-05 |
| 968 | 3 | F2-3 vs. L2-3 | 262122_at       | AT1G02790 | glycine-rich protein;(source:Araport11)                                                                                                                                                                                                                                                                                                                                                                                                                                                                                     | 159.19  | 16.79  | 9.48  | 5.00E-07 | 1.44E-05 |
| 969 | 3 | F2-3 vs. L2-3 | 253619_at       | AT4G30460 |                                                                                                                                                                                                                                                                                                                                                                                                                                                                                                                             | 261.99  | 28.13  | 9.31  | 2.00E-07 | 7.75E-06 |

|     |   |               |                         |           |                                                                                                                                                                                                                                                                                                                                                                                                                                                                                            |         |        |      |          |          |
|-----|---|---------------|-------------------------|-----------|--------------------------------------------------------------------------------------------------------------------------------------------------------------------------------------------------------------------------------------------------------------------------------------------------------------------------------------------------------------------------------------------------------------------------------------------------------------------------------------------|---------|--------|------|----------|----------|
| 970 | 3 | F2-3 vs. L2-3 | 250349_at<br>254283_s_a | AT5G12000 | kinase with adenine nucleotide alpha hydrolases-like domain-containing protein;(source:Araport11)                                                                                                                                                                                                                                                                                                                                                                                          | 435.53  | 47.53  | 9.16 | 1.53E-04 | 7.92E-04 |
| 971 | 3 | F2-3 vs. L2-3 | t                       | AT4G22870 | 2-oxoglutarate (2OG) and Fe(II)-dependent oxygenase superfamily protein;(source:Araport11)                                                                                                                                                                                                                                                                                                                                                                                                 | 751.44  | 82.82  | 9.07 | 8.25E-05 | 5.15E-04 |
| 972 | 3 | F2-3 vs. L2-3 | 253177_s_a              | AT4G35150 | O-methyltransferase family protein;(source:Araport11)<br>Expression is upregulated in the shoot of cax1/cax3 mutant and is responsive to phosphate (Pi) and not phosphite (Phi) in roots and shoots.                                                                                                                                                                                                                                                                                       | 473.33  | 52.50  | 9.02 | 6.40E-06 | 8.73E-05 |
| 973 | 3 | F2-3 vs. L2-3 | 258158_at               | AT3G17790 | glutamate decarboxylase (GAD2)The mRNA is cell-to-cell mobile.                                                                                                                                                                                                                                                                                                                                                                                                                             | 255.07  | 29.03  | 8.79 | < 1e-07  | < 1e-07  |
| 974 | 3 | F2-3 vs. L2-3 | 261970_at               | AT1G65960 |                                                                                                                                                                                                                                                                                                                                                                                                                                                                                            | 1657.23 | 191.20 | 8.67 | 8.00E-07 | 2.05E-05 |
| 975 | 3 | F2-3 vs. L2-3 | 267322_at               | AT2G19330 | Encodes PIRL6, a member of the Plant Intracellular Ras-group-related LRRs (Leucine rich repeat proteins). PIRLs are a distinct, plant-specific class of intracellular LRRs that likely mediate protein interactions, possibly in the context of signal transduction.                                                                                                                                                                                                                       | 154.09  | 18.18  | 8.48 | 2.00E-07 | 7.75E-06 |
| 976 | 3 | F2-3 vs. L2-3 | 252291_s_a<br>t         | AT3G49110 | Class III peroxidase Perx33. Expressed in roots. Located in the cell wall. Involved in cell elongation. Expression activated by light. May play a role in generating H2O2 during defense response. The mRNA is cell-to-cell mobile.                                                                                                                                                                                                                                                        | 105.47  | 12.45  | 8.47 | 6.00E-07 | 1.65E-05 |
| 977 | 3 | F2-3 vs. L2-3 | 260241_at               | AT1G63710 | Encodes a member of the CYP86A subfamily of cytochrome p450 genes. Expressed at highest level in mature stems and flowers.                                                                                                                                                                                                                                                                                                                                                                 | 158.44  | 18.78  | 8.44 | < 1e-07  | 4.57E-06 |
| 978 | 3 | F2-3 vs. L2-3 | 264204_at               | AT1G22710 | Encodes for a high-affinity transporter essential for phloem loading and long-distance transport. A major sucrose transporter, AtSUC2 can also transport a wide range of physiological and synthetic glucose conjugates with both &#945;- or &#946;-linkage.                                                                                                                                                                                                                               | 631.63  | 75.82  | 8.33 | 1.60E-06 | 3.46E-05 |
| 979 | 3 | F2-3 vs. L2-3 | 264400_at               | AT1G61800 | glucose6-Phosphate/phosphate transporter 2. Expression is upregulated in the shoot of cax1/cax3 mutant. The mRNA is cell-to-cell mobile.                                                                                                                                                                                                                                                                                                                                                   | 3412.12 | 413.67 | 8.25 | 2.15E-05 | 1.98E-04 |
| 980 | 3 | F2-3 vs. L2-3 | 267500_s_a              | AT2G44890 | member of CYP704A<br>NADPH/respiratory burst oxidase protein D (RbohD).Interacts with AtrbohF gene to fine tune the spatial control of ROI production and hypersensitive response to cell in and around infection site.                                                                                                                                                                                                                                                                    | 141.21  | 17.18  | 8.22 | < 1e-07  | < 1e-07  |
| 981 | 3 | F2-3 vs. L2-3 | 248719_at               | AT5G47910 | The mRNA is cell-to-cell mobile.                                                                                                                                                                                                                                                                                                                                                                                                                                                           | 163.34  | 19.99  | 8.17 | < 1e-07  | < 1e-07  |
| 982 | 3 | F2-3 vs. L2-3 | 252733_at               | AT3G43120 | SAUR-like auxin-responsive protein family;(source:Araport11)                                                                                                                                                                                                                                                                                                                                                                                                                               | 113.95  | 13.97  | 8.16 | 1.00E-06 | 2.42E-05 |
| 983 | 3 | F2-3 vs. L2-3 | 262664_at               | AT1G13970 | beta-hexosaminidase (DUF1336);(source:Araport11)                                                                                                                                                                                                                                                                                                                                                                                                                                           | 222.53  | 27.35  | 8.14 | 9.50E-06 | 1.14E-04 |
| 984 | 3 | F2-3 vs. L2-3 | 261881_at               | AT1G80760 | Encodes a protein with boron transporter activity. It helps to preferentially direct boron to young developing tissues in the shoot, such as immature leaves, under low boron conditions. This boron channel appears to be impermeable to water, unlike the closely related NIP5;1 boron transporter. This protein also allows the transport of glycerol, urea, and formimide but not larger uncharged solutes such as arabitol and sucrose when it is expressed heterologously.           | 175.63  | 21.80  | 8.06 | < 1e-07  | < 1e-07  |
| 985 | 3 | F2-3 vs. L2-3 | 252377_at               | AT3G47960 | Encodes a high-affinity, proton-dependent glucosinolate-specific transporter that is crucial for the transport of both methionine- and tryptophan-derived glucosinolates to seeds.                                                                                                                                                                                                                                                                                                         | 336.65  | 41.75  | 8.06 | < 1e-07  | < 1e-07  |
| 986 | 3 | F2-3 vs. L2-3 | 261266_at               | AT1G26770 | Encodes an expansin. Naming convention from the Expansin Working Group (Kende et al, Plant Mol Bio). Involved in the formation of nematode-induced syncytia in roots of Arabidopsis thaliana.                                                                                                                                                                                                                                                                                              | 161.12  | 20.33  | 7.93 | 2.00E-06 | 3.93E-05 |
| 987 | 3 | F2-3 vs. L2-3 | 262281_at               | AT1G68570 | NPF3.1 is a membrane localized GA transporter that is expressed in the root endodermis.                                                                                                                                                                                                                                                                                                                                                                                                    | 138.82  | 17.51  | 7.93 | < 1e-07  | < 1e-07  |
| 988 | 3 | F2-3 vs. L2-3 | 259625_at               | AT1G42970 | Encodes chloroplast localized glyceraldehyde-3-phosphate dehydrogenase that can use both NADH and NADPH to reduce 1,3-diphosphate glycerate. It forms A2B2 heterotetramers with GapA forms of the GADPH enzyme. These complexes are active in the light under reducing conditions, but show reduced NADPH-dependent activity in response to oxidized thioredoxins and increased NAD(H)/NADP(H) ratios due to the formation of inactive A8B8 hexadecamers. The mRNA is cell-to-cell mobile. | 1520.22 | 194.10 | 7.83 | 4.00E-07 | 1.25E-05 |
| 989 | 3 | F2-3 vs. L2-3 | 264139_at               | AT1G78940 | kinase with adenine nucleotide alpha hydrolases-like domain-containing protein;(source:Araport11)                                                                                                                                                                                                                                                                                                                                                                                          | 135.93  | 17.45  | 7.79 | 1.01E-05 | 1.19E-04 |
| 990 | 3 | F2-3 vs. L2-3 | 263676_at               | AT1G09340 | Encodes CHLOROPLAST RNA BINDING (CRB), a putative RNA-binding protein. CRB is important for the proper functioning of the chloroplast. Mutations in CRB also affects the circadian system, altering the expression of both oscillator and output genes. The mRNA is cell-to-cell mobile.                                                                                                                                                                                                   | 580.39  | 74.61  | 7.78 | < 1e-07  | 4.57E-06 |

|      |   |               |                         |           |                                                                                                                                                                                                                                                                                                                                                                                                                                                                                                                                                                                                             |         |        |      |          |          |
|------|---|---------------|-------------------------|-----------|-------------------------------------------------------------------------------------------------------------------------------------------------------------------------------------------------------------------------------------------------------------------------------------------------------------------------------------------------------------------------------------------------------------------------------------------------------------------------------------------------------------------------------------------------------------------------------------------------------------|---------|--------|------|----------|----------|
| 991  | 3 | F2-3 vs. L2-3 | 256745_at               | AT3G29360 | Encodes one of four UDP-glucose dehydrogenase (UGD) genes. Mutation of this gene in combination with UGD3 leads to swollen plant cell walls and severe developmental defects associated with changes in pectic polysaccharides.                                                                                                                                                                                                                                                                                                                                                                             | 281.49  | 36.17  | 7.78 | < 1e-07  | < 1e-07  |
| 992  | 3 | F2-3 vs. L2-3 | 248073_at               | AT5G55720 | Pectin lyase-like superfamily protein;(source:Araport11)<br>Encodes a member of a gene family homologous to mammalian SNAP25, a type of SNARE proteins with two chains. There are three members in Arabidopsis: SNAP30, SNAP29, and SNAP33.                                                                                                                                                                                                                                                                                                                                                                 | 78.85   | 10.20  | 7.73 | < 1e-07  | < 1e-07  |
| 993  | 3 | F2-3 vs. L2-3 | 259451_at               | AT1G13890 | Expression of the gene is affected by multiple stresses. Knockout and overexpression lines show no obvious phenotypes.                                                                                                                                                                                                                                                                                                                                                                                                                                                                                      | 106.97  | 14.18  | 7.54 | 1.70E-06 | 3.64E-05 |
| 994  | 3 | F2-3 vs. L2-3 | 253643_at               | AT4G29780 | High-affinity transporter for neutral and acidic amino acids, expressed in tapetum tissue of anthers.                                                                                                                                                                                                                                                                                                                                                                                                                                                                                                       | 888.57  | 118.22 | 7.52 | 2.80E-06 | 4.91E-05 |
| 995  | 3 | F2-3 vs. L2-3 | 265002_at               | AT1G24400 | Transport of 1-Aminocyclopropane-1-carboxylic acid (ACC).                                                                                                                                                                                                                                                                                                                                                                                                                                                                                                                                                   | 133.97  | 17.99  | 7.45 | < 1e-07  | < 1e-07  |
| 996  | 3 | F2-3 vs. L2-3 | 267298_at               | AT2G23760 | Encodes a member of the BEL family of homeodomain proteins. Plants doubly mutant for saw1/saw2 (blh2/blh4) have serrated leaves. BP is expressed in the serrated leaves, therefore saw2 and saw1 may act redundantly to repress BP in leaves. Regulates together with BLH2 demethylesterification of homogalacturonan in seed mucilage.                                                                                                                                                                                                                                                                     | 90.22   | 12.12  | 7.44 | 2.00E-07 | 7.75E-06 |
| 997  | 3 | F2-3 vs. L2-3 | 260205_at               | AT1G70700 | JAZ9 is a protein presumed to be involved in jasmonate signaling. JAZ9 transcript levels rise in response to a jasmonate stimulus. JAZ9 can interact with the COI1 F-box subunit of an SCF E3 ubiquitin ligase in a yeast-two-hybrid assay only in the presence of jasmonate-isoleucine (JA-ILE) or coronatine. The Jas domain appears to be important for JAZ9-COI1 interactions in the presence of coronatine. Two positive residues (R205 and R206) in the Jas domain shown to be important for coronatine -dependent COI1 binding are not required for binding AtMYC2. The mRNA is cell-to-cell mobile. | 189.67  | 25.55  | 7.42 | 1.16E-05 | 1.31E-04 |
| 998  | 3 | F2-3 vs. L2-3 | 251697_at               | AT3G56600 | phosphatidylinositol 4-kinase gamma-like protein;(source:Araport11)<br>Encodes a gamma-glutamyl peptidase, outside the GGT family, that can hydrolyze gamma-glutamyl peptide bonds. The mRNA is cell-to-cell mobile.                                                                                                                                                                                                                                                                                                                                                                                        | 174.30  | 23.51  | 7.41 | 6.25E-05 | 4.25E-04 |
| 999  | 3 | F2-3 vs. L2-3 | 253606_at               | AT4G30530 | PLAT/LH2 domain-containing lipoxygenase family protein;(source:Araport11)                                                                                                                                                                                                                                                                                                                                                                                                                                                                                                                                   | 366.36  | 49.44  | 7.41 | 1.60E-06 | 3.46E-05 |
| 1000 | 3 | F2-3 vs. L2-3 | 260399_at               | AT1G72520 | Protein is tyrosine-phosphorylated and its phosphorylation state is modulated in response to ABA in Arabidopsis thaliana seeds.                                                                                                                                                                                                                                                                                                                                                                                                                                                                             | 140.76  | 19.28  | 7.30 | 4.00E-07 | 1.25E-05 |
| 1001 | 3 | F2-3 vs. L2-3 | 252929_at               | AT4G38970 |                                                                                                                                                                                                                                                                                                                                                                                                                                                                                                                                                                                                             | 3206.21 | 440.63 | 7.28 | 2.00E-06 | 3.93E-05 |
| 1002 | 3 | F2-3 vs. L2-3 | 248918_at               | AT5G45890 | Senescence-associated gene 12 (SAG12) encoding a cysteine protease influenced by cytokinin, auxin, and sugars. Localized to special vacuole found during senescence called senescence associated vacuoles which are different from central vacuole in the tonoplast composition and pH.                                                                                                                                                                                                                                                                                                                     | 229.71  | 31.61  | 7.27 | < 1e-07  | 4.57E-06 |
| 1003 | 3 | F2-3 vs. L2-3 | 251860_at               | AT3G54660 | Encodes glutathione reductase that is most likely localized in the chloroplast.                                                                                                                                                                                                                                                                                                                                                                                                                                                                                                                             | 491.09  | 67.63  | 7.26 | < 1e-07  | < 1e-07  |
| 1004 | 3 | F2-3 vs. L2-3 | 251898_at               | AT3G54340 | Floral homeotic gene encoding a MADS domain protein homologous to SRF transcription factors. Specifies petal and stamen identities. Associates with PISTILLATA.                                                                                                                                                                                                                                                                                                                                                                                                                                             | 334.23  | 46.16  | 7.24 | 4.00E-07 | 1.25E-05 |
| 1005 | 3 | F2-3 vs. L2-3 | 248335_at               | AT5G52450 | MATE efflux family protein;(source:Araport11)                                                                                                                                                                                                                                                                                                                                                                                                                                                                                                                                                               | 236.39  | 32.78  | 7.21 | < 1e-07  | < 1e-07  |
| 1006 | 3 | F2-3 vs. L2-3 | 249008_at               | AT5G44680 | DNA glycosylase superfamily protein;(source:Araport11)                                                                                                                                                                                                                                                                                                                                                                                                                                                                                                                                                      | 704.16  | 98.63  | 7.14 | 1.77E-04 | 8.81E-04 |
| 1007 | 3 | F2-3 vs. L2-3 | 266115_at               | AT2G02140 | Predicted to encode a PR (pathogenesis-related) protein. Belongs to the plant defensin (PDF) family with the following members: At1g75830/PDF1.1, At5g44420/PDF1.2a, At2g26020/PDF1.2b, At5g44430/PDF1.2c, At2g26010/PDF1.3, At1g19610/PDF1.4, At1g55010/PDF1.5, At2g02120/PDF2.1, At2g02100/PDF2.2, At2g02130/PDF2.3, At1g61070/PDF2.4, At5g63660/PDF2.5, At2g02140/PDF2.6, At5g38330/PDF3.1 and At4g30070/PDF3.2.                                                                                                                                                                                         | 166.52  | 23.47  | 7.09 | 4.10E-06 | 6.26E-05 |
| 1008 | 3 | F2-3 vs. L2-3 | 263450_at               | AT2G31500 | member of Calcium Dependent Protein Kinase                                                                                                                                                                                                                                                                                                                                                                                                                                                                                                                                                                  | 99.12   | 14.10  | 7.03 | 3.90E-06 | 6.01E-05 |
| 1009 | 3 | F2-3 vs. L2-3 | 254607_at               | AT4G18920 | histone acetyltransferase (DUF1264);(source:Araport11)                                                                                                                                                                                                                                                                                                                                                                                                                                                                                                                                                      | 115.46  | 16.43  | 7.03 | 1.00E-07 | 4.57E-06 |
| 1010 | 3 | F2-3 vs. L2-3 | 252606_at               | AT3G45010 | serine carboxypeptidase-like 48;(source:Araport11)                                                                                                                                                                                                                                                                                                                                                                                                                                                                                                                                                          | 725.95  | 104.14 | 6.97 | 2.34E-04 | 1.07E-03 |
| 1011 | 3 | F2-3 vs. L2-3 | 255008_at               | AT4G10060 | Glucosylceramidase that preferentially hydrolyzes long acyl chain glucosylceramides.                                                                                                                                                                                                                                                                                                                                                                                                                                                                                                                        | 159.67  | 22.89  | 6.97 | < 1e-07  | < 1e-07  |
| 1012 | 3 | F2-3 vs. L2-3 | 265091_s_a              | AT1G03495 | HXXXD-type acyl-transferase family protein;(source:Araport11)<br>Encodes a putative transcriptional regulator that is involved in the vegetative to reproductive phase transition. Expression is regulated by MIR156b. SPL activity nonautonomously inhibits initiation of new leaves at the shoot apical meristem.                                                                                                                                                                                                                                                                                         | 109.47  | 15.72  | 6.96 | < 1e-07  | < 1e-07  |
| 1013 | 3 | F2-3 vs. L2-3 | 267639_at<br>256008_s_a | AT2G42200 |                                                                                                                                                                                                                                                                                                                                                                                                                                                                                                                                                                                                             | 126.36  | 18.52  | 6.82 | < 1e-07  | < 1e-07  |
| 1014 | 3 | F2-3 vs. L2-3 | t                       | AT1G34040 | Pyridoxal phosphate (PLP)-dependent transferases superfamily protein;(source:Araport11)                                                                                                                                                                                                                                                                                                                                                                                                                                                                                                                     | 96.79   | 14.23  | 6.80 | 3.00E-07 | 1.05E-05 |



|      |   |               |            |           |                                                                                                                                                                                                                                                                                                                                                                                                                                                                                                                                                            |          |         |      |          |          |
|------|---|---------------|------------|-----------|------------------------------------------------------------------------------------------------------------------------------------------------------------------------------------------------------------------------------------------------------------------------------------------------------------------------------------------------------------------------------------------------------------------------------------------------------------------------------------------------------------------------------------------------------------|----------|---------|------|----------|----------|
| 1015 | 3 | F2-3 vs. L2-3 | 245232_at  | AT4G25590 | actin depolymerizing factor 7;(source:Araport11)                                                                                                                                                                                                                                                                                                                                                                                                                                                                                                           | 220.66   | 32.53   | 6.78 | 5.00E-06 | 7.29E-05 |
| 1016 | 3 | F2-3 vs. L2-3 | 250514_at  | AT5G09550 | GDP dissociation inhibitor family protein / Rab GTPase activator family protein;(source:Araport11)                                                                                                                                                                                                                                                                                                                                                                                                                                                         | 219.43   | 32.45   | 6.76 | 6.50E-06 | 8.82E-05 |
|      |   |               | 260829_s_a |           | Encodes a thylakoidal processing peptidase that removes signal sequences from proteins synthesized in the cytoplasm and transported into the thylakoid lumen. The mRNA is cell-to-cell mobile.                                                                                                                                                                                                                                                                                                                                                             |          |         |      |          |          |
| 1017 | 3 | F2-3 vs. L2-3 | t          | AT2G30440 | SEC14-like 12;(source:Araport11)                                                                                                                                                                                                                                                                                                                                                                                                                                                                                                                           | 277.18   | 41.46   | 6.69 | 2.17E-05 | 1.99E-04 |
| 1018 | 3 | F2-3 vs. L2-3 | 246208_at  | AT4G36490 | Stress responsive A/B Barrel Domain-containing protein;(source:Araport11)                                                                                                                                                                                                                                                                                                                                                                                                                                                                                  | 166.76   | 25.03   | 6.66 | 2.60E-06 | 4.67E-05 |
| 1019 | 3 | F2-3 vs. L2-3 | 249894_at  | AT5G22580 | Monomeric G protein. Expressed in root epidermal cells that are destined to become atrichoblasts. Also expressed during pollen development and in the pollen tube tip.                                                                                                                                                                                                                                                                                                                                                                                     | 887.96   | 133.54  | 6.65 | 4.36E-04 | 1.70E-03 |
| 1020 | 3 | F2-3 vs. L2-3 | 257951_at  | AT3G21700 | encodes delta 1-pyrroline-5-carboxylate synthetase B. Gene expression is induced by dehydration, high salt and ABA. Knock-out mutations in P5CS2 are embryo-lethal. P5CS2 appears to be present in different cells and/or different subcellular locations from P5CS1 in a tissue-dependent manner.                                                                                                                                                                                                                                                         | 291.11   | 43.83   | 6.64 | 9.29E-05 | 5.58E-04 |
| 1021 | 3 | F2-3 vs. L2-3 | 251775_s_a | AT3G55610 | Mutants are defective in pollen development.                                                                                                                                                                                                                                                                                                                                                                                                                                                                                                               | 898.52   | 135.61  | 6.63 | 7.36E-04 | 2.52E-03 |
|      |   |               | t          |           | Encodes a hexose sugar transporter that is expressed in pollen. STP6 may play a role in providing sugars during late pollen maturation or pollen tube germination.                                                                                                                                                                                                                                                                                                                                                                                         |          |         |      |          |          |
| 1022 | 3 | F2-3 vs. L2-3 | 258561_at  | AT3G05960 | Pectinacetylsterase family protein;(source:Araport11)                                                                                                                                                                                                                                                                                                                                                                                                                                                                                                      | 115.49   | 17.50   | 6.60 | 6.00E-07 | 1.65E-05 |
| 1023 | 3 | F2-3 vs. L2-3 | 254578_at  | AT4G19410 | Proline-rich extensin-like receptor kinase 4. Functions at an early stage of ABA signalling inhibiting primary root cell elongation by perturbing Ca2+ homeostasis.                                                                                                                                                                                                                                                                                                                                                                                        | 821.27   | 125.65  | 6.54 | 1.70E-06 | 3.64E-05 |
| 1024 | 3 | F2-3 vs. L2-3 | 265923_at  | AT2G18470 | Encodes a member of the BEL-like homeodomain protein family. Ecotopic expression in the embryo sac leads to defects in nuclear migration and cellularization and embryo sacs with multiple egg cells. Loss of function alleles have no female gametophyte defects. The ecotopic expression phenotype requires KNAT3 because it can be suppressed by loss of KNAT3 function alleles. Localized to the nucleus but interaction with OFP1 relocates it to the cytoplasm.                                                                                      | 96.25    | 14.76   | 6.52 | 1.72E-05 | 1.75E-04 |
| 1025 | 3 | F2-3 vs. L2-3 | 263956_at  | AT2G35940 | Encodes a leucine-rich repeat receptor kinase that functions as a receptor for CEP1 peptide.                                                                                                                                                                                                                                                                                                                                                                                                                                                               | 139.55   | 21.44   | 6.51 | < 1e-07  | 4.57E-06 |
| 1026 | 3 | F2-3 vs. L2-3 | 259848_at  | AT1G72180 | Mediates nitrate uptake signaling.                                                                                                                                                                                                                                                                                                                                                                                                                                                                                                                         | 634.81   | 97.93   | 6.48 | 1.60E-06 | 3.46E-05 |
| 1027 | 3 | F2-3 vs. L2-3 | 252343_at  | AT3G48610 | Non-specific phospholipase C6 involved in gametophyte development.                                                                                                                                                                                                                                                                                                                                                                                                                                                                                         | 132.14   | 20.59   | 6.42 | < 1e-07  | < 1e-07  |
|      |   |               | 264474_s_a |           | Encodes a member of the Rubisco small subunit (RBCS) multigene family: RBCS1A (At1g67090), RBCS1B (At5g38430), RBCS2B (At5g38420), and RBCS3B (At5g38410). Activated by OXS2 under the treatment of salt.                                                                                                                                                                                                                                                                                                                                                  |          |         |      |          |          |
| 1028 | 3 | F2-3 vs. L2-3 | t          | AT5G38420 |                                                                                                                                                                                                                                                                                                                                                                                                                                                                                                                                                            | 14651.90 | 2297.97 | 6.38 | < 1e-07  | < 1e-07  |
| 1029 | 3 | F2-3 vs. L2-3 | 246308_at  | AT3G51820 | Encodes a protein with chlorophyll synthase activity. This enzyme has been shown to perform the esterification of chlorophyllide (a and b), the last step of chlorophyll biosynthesis. Although it can use either geranylgeranyl pyrophosphate (GGPP) or phytyl pyrophosphate (PhyPP) as substrates, the esterification reaction was faster with GGPP than with PhyPP.                                                                                                                                                                                     | 1050.08  | 165.00  | 6.36 | 1.00E-07 | 4.57E-06 |
| 1030 | 3 | F2-3 vs. L2-3 | 245528_at  | AT4G15530 | Encodes a dual-targeted protein believed to act as a pyruvate, orthophosphate dikinase. These enzymes are normally associated with C4 photosynthesis which does not occur in Arabidopsis. However, PPDK may play a role in remobilizing nitrogen during leaf senescence in Arabidopsis. The product of the long transcript (.1 gene model) was shown to be targeted to the chloroplast, whereas the shorter transcript (no targeting sequence) accumulates in the cytosol. The two proteins were also found to be expressed in slightly different tissues. | 174.27   | 27.42   | 6.36 | 7.00E-07 | 1.83E-05 |
| 1031 | 3 | F2-3 vs. L2-3 | 245806_at  | AT1G45474 | Encodes a component of the light harvesting complex of photosystem I.                                                                                                                                                                                                                                                                                                                                                                                                                                                                                      | 213.05   | 33.53   | 6.35 | < 1e-07  | < 1e-07  |
| 1032 | 3 | F2-3 vs. L2-3 | 258751_at  | AT3G05890 | Low temperature and salt responsive protein family;(source:Araport11)                                                                                                                                                                                                                                                                                                                                                                                                                                                                                      | 203.24   | 32.02   | 6.35 | 3.05E-04 | 1.31E-03 |
| 1033 | 3 | F2-3 vs. L2-3 | 246908_at  | AT5G25610 | responsive to dehydration 22 (RD22) mediated by ABA                                                                                                                                                                                                                                                                                                                                                                                                                                                                                                        | 2061.09  | 325.33  | 6.34 | 1.00E-07 | 4.57E-06 |
| 1034 | 3 | F2-3 vs. L2-3 | 258415_at  | AT3G17390 | S-adenosylmethionine synthetase                                                                                                                                                                                                                                                                                                                                                                                                                                                                                                                            | 3327.54  | 531.09  | 6.27 | 4.00E-07 | 1.25E-05 |
|      |   |               |            |           | Arabidopsis thaliana aldehyde dehydrogenase AtALDH1a mRNA. a sinapaldehyde dehydrogenase catalyzes both the oxidation of coniferylaldehyde and sinapaldehyde forming ferulic acid and sinapic acid, respectively                                                                                                                                                                                                                                                                                                                                           |          |         |      |          |          |
| 1035 | 3 | F2-3 vs. L2-3 | 258140_at  | AT3G24503 | Acetamidase/Formamidase family protein;(source:Araport11)                                                                                                                                                                                                                                                                                                                                                                                                                                                                                                  | 297.04   | 47.93   | 6.20 | 3.99E-05 | 3.09E-04 |
| 1036 | 3 | F2-3 vs. L2-3 | 253042_at  | AT4G37550 | Encodes AP2C1. Belongs to the clade B of the PP2C-superfamily. Acts as a MAPK phosphatase that negatively regulates MPK4 and MPK6.                                                                                                                                                                                                                                                                                                                                                                                                                         | 184.73   | 30.18   | 6.12 | 6.60E-06 | 8.91E-05 |
|      |   |               | 266834_s_a |           | Encodes AppB protein (AppB1).                                                                                                                                                                                                                                                                                                                                                                                                                                                                                                                              |          |         |      |          |          |
| 1037 | 3 | F2-3 vs. L2-3 | t          | AT2G30020 |                                                                                                                                                                                                                                                                                                                                                                                                                                                                                                                                                            | 3998.62  | 657.73  | 6.08 | 2.12E-04 | 9.99E-04 |
| 1038 | 3 | F2-3 vs. L2-3 | 254123_at  | AT4G24640 |                                                                                                                                                                                                                                                                                                                                                                                                                                                                                                                                                            | 159.76   | 26.33   | 6.07 | 6.00E-07 | 1.65E-05 |

|      |   |               |           |           |                                                                                                                                                                                                                                                                                                                                                                                                                                                                                                                                                                                                |         |        |      |          |          |
|------|---|---------------|-----------|-----------|------------------------------------------------------------------------------------------------------------------------------------------------------------------------------------------------------------------------------------------------------------------------------------------------------------------------------------------------------------------------------------------------------------------------------------------------------------------------------------------------------------------------------------------------------------------------------------------------|---------|--------|------|----------|----------|
| 1039 | 3 | F2-3 vs. L2-3 | 248622_at | AT5G49360 | Encodes a bifunctional {beta}-D-xylosidase/{alpha}-L-arabinofuranosidase required for pectic arabinan modification. Located in the extracellular matrix. Gene is expressed specifically in tissues undergoing secondary wall thickening. This is a member of glycosyl hydrolase family 3 and has six other closely related members.                                                                                                                                                                                                                                                            | 685.37  | 112.91 | 6.07 | 5.00E-07 | 1.44E-05 |
| 1040 | 3 | F2-3 vs. L2-3 | 250610_at | AT5G07550 | member of Oleosin-like protein family                                                                                                                                                                                                                                                                                                                                                                                                                                                                                                                                                          | 84.59   | 14.06  | 6.02 | 3.00E-07 | 1.05E-05 |
| 1041 | 3 | F2-3 vs. L2-3 | 265984_at | AT2G24210 | terpene synthase 10;(source:Araport11)                                                                                                                                                                                                                                                                                                                                                                                                                                                                                                                                                         | 90.26   | 15.05  | 6.00 | 1.00E-07 | 4.57E-06 |
| 1042 | 3 | F2-3 vs. L2-3 | 264207_at | AT1G22750 | transmembrane protein;(source:Araport11)                                                                                                                                                                                                                                                                                                                                                                                                                                                                                                                                                       | 142.23  | 23.84  | 5.97 | 4.00E-07 | 1.25E-05 |
| 1043 | 3 | F2-3 vs. L2-3 | 267590_at | AT2G39700 | putative expansin. Naming convention from the Expansin Working Group (Kende et al, 2004. Plant Mol Bio). Involved in the formation of nematode-induced syncytia in roots of Arabidopsis thaliana.                                                                                                                                                                                                                                                                                                                                                                                              | 131.99  | 22.10  | 5.97 | < 1e-07  | 4.57E-06 |
| 1044 | 3 | F2-3 vs. L2-3 | 261015_at | AT1G26480 | 14-3-3 protein GF14iota (grf12)                                                                                                                                                                                                                                                                                                                                                                                                                                                                                                                                                                | 126.50  | 21.34  | 5.93 | 2.00E-07 | 7.75E-06 |
| 1045 | 3 | F2-3 vs. L2-3 | 267144_at | AT2G38110 | bifunctional sn-glycerol-3-phosphate 2-O-acyltransferase/phosphatase. Involved in cutin assembly.                                                                                                                                                                                                                                                                                                                                                                                                                                                                                              | 427.42  | 72.16  | 5.92 | 1.36E-04 | 7.30E-04 |
| 1046 | 3 | F2-3 vs. L2-3 | 265884_at | AT2G42320 | nucleolar protein gar2-like protein;(source:Araport11)                                                                                                                                                                                                                                                                                                                                                                                                                                                                                                                                         | 315.43  | 53.26  | 5.92 | 7.00E-07 | 1.83E-05 |
| 1047 | 3 | F2-3 vs. L2-3 | 257144_at | AT3G27300 | glucose-6-phosphate dehydrogenase 5;(source:Araport11)                                                                                                                                                                                                                                                                                                                                                                                                                                                                                                                                         | 191.42  | 32.53  | 5.88 | 2.62E-05 | 2.27E-04 |
| 1048 | 3 | F2-3 vs. L2-3 | 253172_at | AT4G35060 | Heavy metal transport/detoxification superfamily protein;(source:Araport11)                                                                                                                                                                                                                                                                                                                                                                                                                                                                                                                    | 154.21  | 26.28  | 5.87 | 1.94E-05 | 1.88E-04 |
| 1049 | 3 | F2-3 vs. L2-3 | 252101_at | AT3G51290 | pyridoxal-phosphate-dependent serine hydroxymethyltransferase, putative (DUF632);(source:Araport11)                                                                                                                                                                                                                                                                                                                                                                                                                                                                                            | 1018.93 | 175.56 | 5.80 | 4.00E-07 | 1.25E-05 |
| 1050 | 3 | F2-3 vs. L2-3 | 262796_at | AT1G20850 | Cysteine peptidase. Enzyme activity detected in leaf. gamma tonoplast intrinsic protein 2 (TIP2). expressed throughout the plant and transcript level is increased upon NaCl or ABA treatments. NaCl stress-sensitive yeast mutant strains exhibit more resistance to salt when expressing this protein.                                                                                                                                                                                                                                                                                       | 521.80  | 90.18  | 5.79 | < 1e-07  | < 1e-07  |
| 1051 | 3 | F2-3 vs. L2-3 | 257313_at | AT3G26520 | methionine adenosyltransferase 3;(source:Araport11)                                                                                                                                                                                                                                                                                                                                                                                                                                                                                                                                            | 233.12  | 40.95  | 5.69 | 3.00E-07 | 1.05E-05 |
| 1052 | 3 | F2-3 vs. L2-3 | 263838_at | AT2G36880 | Member of a diversely expressed predicted peptide family showing sequence similarity to tobacco Rapid Alkalinization Factor (RALF), and is believed to play an essential role in the physiology of Arabidopsis. Consists of a single exon and is characterized by a conserved C-terminal motif and N-terminal signal peptide. RALF4 and RALF19 act redundantly in the pollen tube to regulate pollen tube growth.                                                                                                                                                                              | 2125.42 | 374.08 | 5.68 | 7.63E-05 | 4.85E-04 |
| 1053 | 3 | F2-3 vs. L2-3 | 245658_at | AT1G28270 | phosphatidylinositol-speciwc phospholipase C4;(source:Araport11)                                                                                                                                                                                                                                                                                                                                                                                                                                                                                                                               | 149.87  | 26.41  | 5.67 | < 1e-07  | 4.57E-06 |
| 1054 | 3 | F2-3 vs. L2-3 | 247776_at | AT5G58700 | ** Referred to as MIPS1 in Mitsuhashi et al 2008. Myo-inositol-1-phosphate synthase isoform 2. Expressed in leaf, root and silique. Immunolocalization experiments with an antibody recognizing MIPS1, MIPS2, and MIPS3 showed endosperm localization.                                                                                                                                                                                                                                                                                                                                         | 222.78  | 39.69  | 5.61 | < 1e-07  | < 1e-07  |
| 1055 | 3 | F2-3 vs. L2-3 | 263433_at | AT2G22240 |                                                                                                                                                                                                                                                                                                                                                                                                                                                                                                                                                                                                | 792.73  | 141.89 | 5.59 | 3.70E-06 | 5.84E-05 |
| 1056 | 3 | F2-3 vs. L2-3 | 261754_at | AT1G76130 | alpha-amylase, putative / 1,4-alpha-D-glucan glucanohydrolase, putative, strong similarity to alpha-amylase Gl:7532799 from (Malus x domestica);contains Pfam profile PF00128: Alpha amylase, catalytic domain. Predicted to be secreted based on SignalP analysis. Encodes MUC110, a galactomannan-1,6-galactosyltransferase. MUC110 likely decorates glucomannan, synthesized by CSLA2, with galactose residues in vivo. The degree of galactosylation is essential for the synthesis of the GGM backbone, the structure of cellulose, mucilage density, as well as the adherence of pectin. | 380.39  | 68.26  | 5.57 | 5.00E-07 | 1.44E-05 |
| 1057 | 3 | F2-3 vs. L2-3 | 266802_at | AT2G22900 | EXS (ERD1/XPR1/SYG1) family protein;(source:Araport11)                                                                                                                                                                                                                                                                                                                                                                                                                                                                                                                                         | 315.60  | 56.63  | 5.57 | < 1e-07  | < 1e-07  |
| 1058 | 3 | F2-3 vs. L2-3 | 257106_at | AT3G29060 |                                                                                                                                                                                                                                                                                                                                                                                                                                                                                                                                                                                                | 157.39  | 28.27  | 5.57 | 1.40E-05 | 1.51E-04 |
| 1059 | 3 | F2-3 vs. L2-3 | 254551_at | AT4G19840 | encodes a phloem lectin, similar to phloem lectin in cucumber and celery. Gene is expressed in the phloem, predominantly in the companion cells. The mRNA is cell-to-cell mobile.                                                                                                                                                                                                                                                                                                                                                                                                              | 226.49  | 40.81  | 5.55 | 2.00E-07 | 7.75E-06 |
| 1060 | 3 | F2-3 vs. L2-3 | 245275_at | AT4G15210 | cytosolic beta-amylase expressed in rosette leaves and inducible by sugar. RAM1 mutants have reduced beta amylase in leaves and stems.                                                                                                                                                                                                                                                                                                                                                                                                                                                         | 1508.57 | 273.09 | 5.52 | 2.00E-06 | 3.93E-05 |
| 1061 | 3 | F2-3 vs. L2-3 | 251358_at | AT3G61160 | Protein kinase superfamily protein;(source:Araport11)                                                                                                                                                                                                                                                                                                                                                                                                                                                                                                                                          | 307.46  | 55.81  | 5.51 | 3.50E-06 | 5.69E-05 |
| 1062 | 3 | F2-3 vs. L2-3 | 267181_at | AT2G37760 | Encodes an NADPH-dependent aldo-keto reductase that can act on a wide variety of substrates in vitro including aliphatic and aromatic aldehydes and steroids. Transcript levels for this gene are up-regulated in response to cold, salt, and drought stress.                                                                                                                                                                                                                                                                                                                                  | 481.46  | 87.71  | 5.49 | 1.07E-05 | 1.23E-04 |
| 1063 | 3 | F2-3 vs. L2-3 | 259429_at | AT1G01600 | Encodes a member of the CYP86A subfamily of cytochrome p450 genes. Expressed significantly at highest level in mature stems and flowers.                                                                                                                                                                                                                                                                                                                                                                                                                                                       | 122.76  | 22.44  | 5.47 | 3.90E-06 | 6.01E-05 |
| 1064 | 3 | F2-3 vs. L2-3 | 264835_at | AT1G03550 | Secretory carrier membrane protein (SCAMP) family protein;(source:Araport11)                                                                                                                                                                                                                                                                                                                                                                                                                                                                                                                   | 73.37   | 13.51  | 5.43 | 7.00E-07 | 1.83E-05 |

|      |   |               |            |           |                                                                                                                                                                                                                                                                                                                                                                                    |         |         |      |          |          |
|------|---|---------------|------------|-----------|------------------------------------------------------------------------------------------------------------------------------------------------------------------------------------------------------------------------------------------------------------------------------------------------------------------------------------------------------------------------------------|---------|---------|------|----------|----------|
| 1065 | 3 | F2-3 vs. L2-3 | 261559_at  | AT1G01780 | Encodes a member of the Arabidopsis LIM proteins: a family of actin bundlers with distinct expression patterns. WLIM1, WLIM2a, and WLIM2b are widely expressed, whereas PLIM2a, PLIM2b, and PLIM2c are predominantly expressed in pollen. Regulates actin cytoskeleton organization. The mRNA is cell-to-cell mobile.                                                              | 142.63  | 26.50   | 5.38 | 2.00E-07 | 7.75E-06 |
| 1066 | 3 | F2-3 vs. L2-3 | 253344_at  | AT4G33550 | Bifunctional inhibitor/lipid-transfer protein/seed storage 2S albumin superfamily protein;(source:Araport11)                                                                                                                                                                                                                                                                       | 151.83  | 28.20   | 5.38 | 1.01E-05 | 1.19E-04 |
| 1067 | 3 | F2-3 vs. L2-3 | 246878_at  | AT5G26060 | Plant self-incompatibility protein S1 family;(source:Araport11)                                                                                                                                                                                                                                                                                                                    | 170.31  | 31.68   | 5.38 | 3.00E-07 | 1.05E-05 |
| 1068 | 3 | F2-3 vs. L2-3 | 244959_s_a | AT2G07708 | hypothetical protein;(source:Araport11)                                                                                                                                                                                                                                                                                                                                            | 2004.15 | 377.65  | 5.31 | 7.69E-05 | 4.86E-04 |
| 1069 | 3 | F2-3 vs. L2-3 | 258369_at  | AT3G14310 | encodes a pectin methylesterase, targeted by a cellulose binding protein (CBP) from the parasitic nematode <i>Heterodera schachtii</i> during parasitism.                                                                                                                                                                                                                          | 136.63  | 25.84   | 5.29 | 2.00E-07 | 7.75E-06 |
| 1070 | 3 | F2-3 vs. L2-3 | 251962_at  | AT3G53420 | a member of the plasma membrane intrinsic protein subfamily PIP2. localizes to the plasma membrane and exhibits water transport activity in <i>Xenopus</i> oocyte. expressed specifically in the vascular bundles and protein level increases slightly during leaf dev. When expressed in yeast cells can conduct hydrogen peroxide into those cells.                              | 2221.49 | 420.25  | 5.29 | 6.60E-06 | 8.91E-05 |
| 1071 | 3 | F2-3 vs. L2-3 | 247377_at  | AT5G63180 | Pectin lyase-like superfamily protein;(source:Araport11)                                                                                                                                                                                                                                                                                                                           | 118.01  | 22.32   | 5.29 | 7.49E-05 | 4.77E-04 |
| 1072 | 3 | F2-3 vs. L2-3 | 255016_at  | AT4G10120 | Encodes a protein with putative sucrose-phosphate synthase activity.                                                                                                                                                                                                                                                                                                               | 135.49  | 25.75   | 5.26 | 9.85E-04 | 3.18E-03 |
| 1073 | 3 | F2-3 vs. L2-3 | 249536_at  | AT5G38760 | Late embryogenesis abundant protein (LEA) family protein;(source:Araport11)                                                                                                                                                                                                                                                                                                        | 60.70   | 11.56   | 5.25 | < 1e-07  | < 1e-07  |
| 1074 | 3 | F2-3 vs. L2-3 | 255459_at  | AT4G02890 | Polyubiquitin gene containing 4 ubiquitin repeats.                                                                                                                                                                                                                                                                                                                                 | 7096.89 | 1353.78 | 5.24 | 7.30E-06 | 9.59E-05 |
| 1075 | 3 | F2-3 vs. L2-3 | 260693_at  | AT1G32450 | Transmembrane nitrate transporter. Involved in xylem transport of nitrate from root to shoot. Induced in response to high and low concentrations of nitrate. Not involved in nitrate uptake. Expressed in root pericycle cells under the control of MYB59. Also functions as a proton-coupled H <sup>+</sup> /K <sup>+</sup> antiporter for K <sup>+</sup> loading into the xylem. | 486.13  | 93.23   | 5.21 | 2.26E-04 | 1.05E-03 |
| 1076 | 3 | F2-3 vs. L2-3 | 254926_at  | AT4G11280 | encodes a a member of the 1-aminocyclopropane-1-carboxylate (ACC) synthase (S-adenosyl-L-methionine methylthioadenosine-lyase, EC 4.4.1.14) gene family The mRNA is cell-to-cell mobile.                                                                                                                                                                                           | 505.25  | 96.95   | 5.21 | 1.02E-05 | 1.20E-04 |
| 1077 | 3 | F2-3 vs. L2-3 | 267595_at  | AT2G32990 | glycosyl hydrolase 9B8;(source:Araport11)                                                                                                                                                                                                                                                                                                                                          | 113.29  | 21.81   | 5.20 | 2.00E-06 | 3.93E-05 |
| 1078 | 3 | F2-3 vs. L2-3 | 263867_at  | AT2G36830 | Encodes a tonoplast intrinsic protein, which functions as water channel. It has also been shown to be able to facilitate the transport of urea and hydrogen peroxide. Highly expressed in vascular tissues of the root, stem, cauline leaves and flowers but not in the apical meristems. The mRNA is cell-to-cell mobile.                                                         | 626.20  | 120.56  | 5.19 | 9.00E-07 | 2.22E-05 |
| 1079 | 3 | F2-3 vs. L2-3 | 253191_at  | AT4G35350 | tracheary element vacuolar protein                                                                                                                                                                                                                                                                                                                                                 | 245.23  | 47.22   | 5.19 | 1.00E-07 | 4.57E-06 |
| 1080 | 3 | F2-3 vs. L2-3 | 263761_at  | AT2G21330 | fructose-bisphosphate aldolase 1;(source:Araport11)                                                                                                                                                                                                                                                                                                                                | 1051.90 | 203.22  | 5.18 | 7.70E-06 | 9.97E-05 |
| 1081 | 3 | F2-3 vs. L2-3 | 262951_at  | AT1G75500 | An Arabidopsis thaliana homolog of <i>Medicago truncatula</i> NODULIN21 (MtN21). The gene encodes a plant-specific, predicted integral membrane protein and is a member of the Plant-Drug/Metabolite Exporter (P-DME) family (Transporter Classification number: TC 2.A.7.3) and the nodulin MtN21-like transporter family.                                                        | 388.40  | 75.21   | 5.16 | < 1e-07  | 4.57E-06 |
| 1082 | 3 | F2-3 vs. L2-3 | 258005_at  | AT3G19390 | Granulin repeat cysteine protease family protein;(source:Araport11)                                                                                                                                                                                                                                                                                                                | 1054.12 | 204.41  | 5.16 | 3.69E-04 | 1.50E-03 |
| 1083 | 3 | F2-3 vs. L2-3 | 252592_at  | AT3G45640 | Encodes a mitogen-activated kinase whose mRNA levels increase in response to touch, cold, salinity stress and chitin oligomers. Also functions in ovule development. Heterozygous MPK3 mutants in a homozygous MPK6 background are female sterile due to defects in integument development. MPK3 can be dephosphorylated by MKP2 in vitro. The mRNA is cell-to-cell mobile.        | 189.72  | 36.74   | 5.16 | 1.06E-05 | 1.22E-04 |
| 1084 | 3 | F2-3 vs. L2-3 | 258685_at  | AT3G07830 | Pectin lyase-like superfamily protein;(source:Araport11)                                                                                                                                                                                                                                                                                                                           | 527.66  | 102.53  | 5.15 | 1.40E-06 | 3.16E-05 |
| 1085 | 3 | F2-3 vs. L2-3 | 256279_at  | AT3G12620 | Protein phosphatase 2C family protein;(source:Araport11)                                                                                                                                                                                                                                                                                                                           | 304.51  | 59.57   | 5.11 | 2.62E-05 | 2.27E-04 |
| 1086 | 3 | F2-3 vs. L2-3 | 256754_at  | AT3G25690 | actin binding protein required for normal chloroplast positioningThe mRNA is cell-to-cell mobile. Encodes a leucine-rich-repeat RLK that is localized to the plasma membrane of pollen tubes and functions with MIK1/2 as the male receptor of the pollen tube chemo-attractant LURE1.MDIS1 forms a complex with MIK1/2 and binds LURE1.                                           | 324.67  | 64.10   | 5.07 | < 1e-07  | < 1e-07  |
| 1087 | 3 | F2-3 vs. L2-3 | 248916_at  | AT5G45840 | Encodes a member of ARF-like GTPase family. A thaliana has 21 members, in two subfamilies, ARF and ARF-like (ARL) GTPases. Mutant has abnormal mitosis and cell cycle control during seed development.                                                                                                                                                                             | 65.44   | 12.96   | 5.05 | 2.80E-06 | 4.91E-05 |
| 1088 | 3 | F2-3 vs. L2-3 | 265337_at  | AT2G18390 | NAD(P)-binding Rossmann-fold superfamily protein;(source:Araport11)                                                                                                                                                                                                                                                                                                                | 356.08  | 70.65   | 5.04 | 2.00E-07 | 7.75E-06 |
| 1089 | 3 | F2-3 vs. L2-3 | 253638_at  | AT4G30470 | H[+]-ATPase 7;(source:Araport11)                                                                                                                                                                                                                                                                                                                                                   | 624.68  | 123.85  | 5.04 | 9.00E-07 | 2.22E-05 |
| 1090 | 3 | F2-3 vs. L2-3 | 251405_at  | AT3G60330 |                                                                                                                                                                                                                                                                                                                                                                                    | 193.16  | 38.49   | 5.02 | 2.00E-07 | 7.75E-06 |

|      |   |               |            |           |                                                                                                                                                                                                                                                                                                                                                                                                                                                                                                                                                                                                                                                                                                                                                                                                  |         |        |      |          |          |
|------|---|---------------|------------|-----------|--------------------------------------------------------------------------------------------------------------------------------------------------------------------------------------------------------------------------------------------------------------------------------------------------------------------------------------------------------------------------------------------------------------------------------------------------------------------------------------------------------------------------------------------------------------------------------------------------------------------------------------------------------------------------------------------------------------------------------------------------------------------------------------------------|---------|--------|------|----------|----------|
| 1091 | 3 | F2-3 vs. L2-3 | 256017_at  | AT1G19180 | JAZ1 is a nuclear-localized protein involved in jasmonate signaling. JAZ1 transcript levels rise in response to a jasmonate stimulus. JAZ1 can interact with the COI1 F-box subunit of an SCF E3 ubiquitin ligase in a yeast-two-hybrid assay only in the presence of jasmonate-isoleucine (JA-Ile) or coronatine. Application of jasmonate methyl ester to Arabidopsis roots reduces the levels of a JAZ1:GUS fusion protein, presumably by stimulating ubiquitin-proteasome-mediated degradation. The Jas domain appears to be important for JAZ1-COI1 interactions in the presence of coronatine. Two positive residues (R205 and R206) in the Jas domain shown to be important for coronatine - dependent COI1 binding are not required for binding AtMYC2. The mRNA is cell-to-cell mobile. | 464.88  | 92.76  | 5.01 | 3.00E-06 | 5.09E-05 |
| 1092 | 3 | F2-3 vs. L2-3 | 251591_at  | AT3G57680 | Peptidase S41 family protein;(source:Araport11)                                                                                                                                                                                                                                                                                                                                                                                                                                                                                                                                                                                                                                                                                                                                                  | 373.61  | 74.71  | 5.00 | < 1e-07  | < 1e-07  |
| 1093 | 3 | F2-3 vs. L2-3 | 253954_at  | AT4G26970 | Encodes an aconitase that can catalyze the conversion of citrate to isocitrate through a cis-aconitate intermediate, indicating that it may participate in the TCA cycle and other primary metabolic pathways. The protein is believed to accumulate in the mitochondria and the cytosol. It affects CSD2 (At2g28190 - a superoxide dismutase) transcript levels and may play a role in the response to oxidative stress. One member of the family (ACO1 - At35830) was shown to specifically bind to the 5' UTR of CSD2 in vitro. The mRNA is cell-to-cell mobile.                                                                                                                                                                                                                              | 1665.80 | 334.03 | 4.99 | 3.20E-06 | 5.35E-05 |
| 1094 | 3 | F2-3 vs. L2-3 | 255149_at  | AT4G08150 | A member of class I knotted1-like homeobox gene family (together with KNAT2). Similar to the knotted1 (kn1) homeobox gene of maize. Normally expressed in the peripheral and rib zone of shoot apical meristem but not in the leaf primordia. It is also expressed in the fourth floral whorl, in the region that would become style, particularly in the cell surrounding the transmitting tissue. No expression was detected in the first three floral whorls. Expression is repressed by auxin and AS1 which results in the promotion of leaf fate.                                                                                                                                                                                                                                           | 84.83   | 17.04  | 4.98 | 6.00E-07 | 1.65E-05 |
| 1095 | 3 | F2-3 vs. L2-3 | 254563_at  | AT4G19120 | S-adenosyl-L-methionine-dependent methyltransferases superfamily protein;(source:Araport11)<br>Encodes adenosine-5'-phosphosulfate kinase. Provides activated sulfate for sulfation of secondary metabolites, including the glucosinolates. Essential for pollen viability. The mRNA is cell-to-cell mobile.                                                                                                                                                                                                                                                                                                                                                                                                                                                                                     | 232.25  | 46.59  | 4.98 | 1.46E-05 | 1.56E-04 |
| 1096 | 3 | F2-3 vs. L2-3 | 267112_at  | AT2G14750 |                                                                                                                                                                                                                                                                                                                                                                                                                                                                                                                                                                                                                                                                                                                                                                                                  | 159.79  | 32.14  | 4.97 | < 1e-07  | 4.57E-06 |
| 1097 | 3 | F2-3 vs. L2-3 | 248199_at  | AT5G54170 | Polyketide cyclase/dehydrase and lipid transport superfamily protein;(source:Araport11)                                                                                                                                                                                                                                                                                                                                                                                                                                                                                                                                                                                                                                                                                                          | 285.96  | 57.68  | 4.96 | < 1e-07  | 4.57E-06 |
| 1098 | 3 | F2-3 vs. L2-3 | 257986_at  | AT3G20865 | Encodes a putative arabinogalactan-protein (AGP40) that is expressed in pollen.                                                                                                                                                                                                                                                                                                                                                                                                                                                                                                                                                                                                                                                                                                                  | 378.40  | 76.42  | 4.95 | 6.84E-04 | 2.38E-03 |
| 1099 | 3 | F2-3 vs. L2-3 | 266708_at  | AT2G03200 | Atypical aspartic protease which modulates lateral root development.                                                                                                                                                                                                                                                                                                                                                                                                                                                                                                                                                                                                                                                                                                                             | 87.00   | 17.60  | 4.94 | 9.00E-07 | 2.22E-05 |
| 1100 | 3 | F2-3 vs. L2-3 | 266764_at  | AT2G47050 | Plant invertase/pectin methylesterase inhibitor superfamily protein;(source:Araport11)                                                                                                                                                                                                                                                                                                                                                                                                                                                                                                                                                                                                                                                                                                           | 119.77  | 24.23  | 4.94 | 3.75E-04 | 1.52E-03 |
| 1101 | 3 | F2-3 vs. L2-3 | 259226_at  | AT3G07700 | ABC1K7 is a member of an atypical protein kinase family that is induced by salt stress. Loss of function mutations affect the metabolic profile of chloroplast lipids. It appears to function along with ABC1K8 in mediating lipid membrane changes in response to stress.                                                                                                                                                                                                                                                                                                                                                                                                                                                                                                                       | 376.98  | 76.87  | 4.90 | 1.05E-04 | 6.09E-04 |
| 1102 | 3 | F2-3 vs. L2-3 | 262905_at  | AT1G59730 | Thioredoxin H-type 7 , oxidoreductase located in cytosol and ER. Interacts with GPT1.                                                                                                                                                                                                                                                                                                                                                                                                                                                                                                                                                                                                                                                                                                            | 67.10   | 13.81  | 4.86 | 2.90E-06 | 5.02E-05 |
| 1103 | 3 | F2-3 vs. L2-3 | 259736_at  | AT1G64390 | glycosyl hydrolase 9C2;(source:Araport11)                                                                                                                                                                                                                                                                                                                                                                                                                                                                                                                                                                                                                                                                                                                                                        | 351.18  | 72.92  | 4.82 | 5.17E-05 | 3.71E-04 |
| 1104 | 3 | F2-3 vs. L2-3 | 265115_at  | AT1G62450 | Immunoglobulin E-set superfamily protein;(source:Araport11)                                                                                                                                                                                                                                                                                                                                                                                                                                                                                                                                                                                                                                                                                                                                      | 96.59   | 20.10  | 4.81 | 2.00E-06 | 3.93E-05 |
| 1105 | 3 | F2-3 vs. L2-3 | 256627_at  | AT3G19970 | alpha/beta-Hydrolases superfamily protein;(source:Araport11)                                                                                                                                                                                                                                                                                                                                                                                                                                                                                                                                                                                                                                                                                                                                     | 285.38  | 59.35  | 4.81 | 1.64E-04 | 8.34E-04 |
| 1106 | 3 | F2-3 vs. L2-3 | 245101_at  | AT2G40890 | encodes coumarate 3-hydroxylase (C3H), a P450-dependent monooxygenase. Involved in lignin biosynthesis and flavonoid biosynthesis. Also affects the biosynthesis of coumarins such as scopoletin and scopolin as a branching-out-pathway from the phenylpropanoid acid level. Encodes a putative auto-regulated Ca2+-ATPase located in the plasma membrane involved in transporting Ca2+ outside developing pollen grains. This activity is important to support normal pollen development, particularly the progression to uninucleated microspores to bicellular pollen grains.                                                                                                                                                                                                                | 283.16  | 59.02  | 4.80 | < 1e-07  | 4.57E-06 |
| 1107 | 3 | F2-3 vs. L2-3 | 267255_at  | AT2G22950 | Pectin lyase-like superfamily protein;(source:Araport11)                                                                                                                                                                                                                                                                                                                                                                                                                                                                                                                                                                                                                                                                                                                                         | 268.37  | 56.28  | 4.77 | 4.20E-06 | 6.33E-05 |
| 1108 | 3 | F2-3 vs. L2-3 | 258645_s_a | AT3G07850 | one of the type IIB calcium pump isoforms. encodes an autoinhibited Ca(2+)-ATPase that contains an N-terminal calmodulin binding autoinhibitory domain.                                                                                                                                                                                                                                                                                                                                                                                                                                                                                                                                                                                                                                          | 78.03   | 16.34  | 4.77 | 3.81E-05 | 2.98E-04 |
| 1109 | 3 | F2-3 vs. L2-3 | 258035_at  | AT3G21180 | nuclear factor Y, subunit B7;(source:Araport11)                                                                                                                                                                                                                                                                                                                                                                                                                                                                                                                                                                                                                                                                                                                                                  | 114.94  | 24.10  | 4.77 | 5.45E-05 | 3.87E-04 |
| 1110 | 3 | F2-3 vs. L2-3 | 263718_at  | AT2G13570 |                                                                                                                                                                                                                                                                                                                                                                                                                                                                                                                                                                                                                                                                                                                                                                                                  | 70.59   | 14.86  | 4.75 | 6.00E-07 | 1.65E-05 |

|      |   |               |                                              |           |                                                                                                                                                                                                                                                                                                                                                                                                                                                  |         |        |      |          |          |
|------|---|---------------|----------------------------------------------|-----------|--------------------------------------------------------------------------------------------------------------------------------------------------------------------------------------------------------------------------------------------------------------------------------------------------------------------------------------------------------------------------------------------------------------------------------------------------|---------|--------|------|----------|----------|
|      |   |               |                                              |           | The AtIMD1 is one out of 3 genes encoding the enzyme 3-isopropylmalate dehydrogenase involved in leucine biosynthesis in Arabidopsis. Its subcellular location has been targeted to plastids.                                                                                                                                                                                                                                                    |         |        |      |          |          |
| 1111 | 3 | F2-3 vs. L2-3 | 263706_s_a<br>t                              | AT5G14200 | Encodes methylthioalkylmalate dehydrogenase. Involved in glucosinolate biosynthesis, in methionine chain elongation. The mRNA is cell-to-cell mobile.                                                                                                                                                                                                                                                                                            | 57.46   | 12.13  | 4.74 | 1.50E-05 | 1.58E-04 |
| 1112 | 3 | F2-3 vs. L2-3 | 265475_at                                    | AT2G15620 | Involved in the second step of nitrate assimilation. Its expression is induced by nitrate. The mRNA is cell-to-cell mobile.                                                                                                                                                                                                                                                                                                                      | 154.90  | 32.98  | 4.70 | < 1e-07  | < 1e-07  |
| 1113 | 3 | F2-3 vs. L2-3 | 263709_at                                    | AT1G09310 | plant/protein (Protein of unknown function, DUF538);(source:Araport11)                                                                                                                                                                                                                                                                                                                                                                           | 149.29  | 32.10  | 4.65 | 5.02E-05 | 3.63E-04 |
| 1114 | 3 | F2-3 vs. L2-3 | 262146_at                                    | AT1G52580 | RHOMBOID-like protein 5;(source:Araport11)                                                                                                                                                                                                                                                                                                                                                                                                       | 446.77  | 96.84  | 4.61 | 2.50E-06 | 4.58E-05 |
| 1115 | 3 | F2-3 vs. L2-3 | 257054_at<br>AFFX-r2-At-<br>GAPDH-<br>5_s_at | AT3G15353 | metallothionein, binds to and detoxifies excess copper and other metals, limiting oxidative damage                                                                                                                                                                                                                                                                                                                                               | 65.31   | 14.21  | 4.60 | 8.40E-06 | 1.05E-04 |
| 1116 | 3 | F2-3 vs. L2-3 | 263379_at                                    | AT3G04120 | encodes cytosolic GAPDH (C subunit) involved in the glycolytic pathway but also interacts with H2O2 potentially placing it in a signalling cascade induced by ROS. The mRNA is cell-to-cell mobile.                                                                                                                                                                                                                                              | 602.35  | 131.25 | 4.59 | 3.00E-06 | 5.09E-05 |
| 1117 | 3 | F2-3 vs. L2-3 | 265368_at                                    | AT2G40140 | zinc finger (CCCH-type) family protein;(source:Araport11)                                                                                                                                                                                                                                                                                                                                                                                        | 236.54  | 51.50  | 4.59 | 5.60E-06 | 7.97E-05 |
| 1118 | 3 | F2-3 vs. L2-3 | 254762_at                                    | AT2G13350 | Calcium-dependent lipid-binding (CaLB domain) family protein;(source:Araport11)                                                                                                                                                                                                                                                                                                                                                                  | 342.43  | 74.92  | 4.57 | 3.00E-07 | 1.05E-05 |
| 1119 | 3 | F2-3 vs. L2-3 |                                              | AT4G13230 | Late embryogenesis abundant protein (LEA) family protein;(source:Araport11)                                                                                                                                                                                                                                                                                                                                                                      | 84.68   | 18.59  | 4.56 | 2.40E-06 | 4.54E-05 |
| 1120 | 3 | F2-3 vs. L2-3 | 267168_at                                    | AT2G37770 | Encodes an NADPH-dependent aldo-keto reductase that can act on a wide variety of substrates in vitro including saturated and unsaturated aldehydes, steroids, and sugars. GFP-tagged AKR4C9 localizes to the chloroplast where it may play a role in detoxifying reactive carbonyl compounds that threaten to impair the photosynthetic process. Transcript levels for this gene are up-regulated in response to cold, salt, and drought stress. | 62.27   | 13.74  | 4.53 | 2.00E-07 | 7.75E-06 |
| 1121 | 3 | F2-3 vs. L2-3 | 244935_at<br>265444_s_a<br>t                 | ATCG01090 | Encodes subunit of the chloroplast NAD(P)H dehydrogenase complex a member of the plasma membrane intrinsic protein PIP2. functions as aquaporin and is involved in desiccation.                                                                                                                                                                                                                                                                  | 142.22  | 31.66  | 4.49 | 3.92E-05 | 3.05E-04 |
| 1122 | 3 | F2-3 vs. L2-3 | 257119_at                                    | AT2G37180 | Leucine-rich repeat protein kinase family protein;(source:Araport11)                                                                                                                                                                                                                                                                                                                                                                             | 1361.75 | 303.89 | 4.48 | 1.20E-06 | 2.80E-05 |
| 1123 | 3 | F2-3 vs. L2-3 |                                              | AT3G20190 | Catalase, catalyzes the breakdown of hydrogen peroxide (H2O2) into water and oxygen. The mRNA is cell-to-cell mobile.                                                                                                                                                                                                                                                                                                                            | 61.77   | 13.81  | 4.47 | < 1e-07  | < 1e-07  |
| 1124 | 3 | F2-3 vs. L2-3 | 259544_at                                    | AT1G20620 | Gibberellin-regulated family protein;(source:Araport11)                                                                                                                                                                                                                                                                                                                                                                                          | 1678.52 | 382.28 | 4.39 | 1.81E-04 | 8.86E-04 |
| 1125 | 3 | F2-3 vs. L2-3 | 260221_at                                    | AT1G74670 |                                                                                                                                                                                                                                                                                                                                                                                                                                                  | 44.06   | 10.04  | 4.39 | 7.00E-07 | 1.83E-05 |
| 1126 | 3 | F2-3 vs. L2-3 | 251304_at                                    | AT3G61990 | Encodes a protein methyltransferase. Involved in the methylation of plant transmembrane proteins.                                                                                                                                                                                                                                                                                                                                                | 521.52  | 119.54 | 4.36 | 3.32E-04 | 1.39E-03 |
| 1127 | 3 | F2-3 vs. L2-3 | 247643_at                                    | AT5G60450 | Encodes a member of the ARF family of transcription factors which mediate auxin responses. ARF4 appears to have redundant function with ETT(ARF3) in specifying abaxial cell identity.                                                                                                                                                                                                                                                           | 139.30  | 32.09  | 4.34 | 1.95E-05 | 1.88E-04 |
| 1128 | 3 | F2-3 vs. L2-3 | 254270_at                                    | AT4G23100 | Encodes the enzyme glutamate-cysteine ligase catalyzing the first, and rate-limiting, step of glutathione biosynthesis. Required for cell proliferation at the root tip. Involved in susceptibility to the bacterial pathogen Pseudomonas syringae. Mutants are phytoalexin defective.                                                                                                                                                           | 102.52  | 23.88  | 4.29 | 3.00E-07 | 1.05E-05 |
| 1129 | 3 | F2-3 vs. L2-3 | 246998_at                                    | AT5G67370 | DUF1230 family protein (DUF1230);(source:Araport11)                                                                                                                                                                                                                                                                                                                                                                                              | 140.64  | 32.91  | 4.27 | 2.50E-06 | 4.58E-05 |
| 1130 | 3 | F2-3 vs. L2-3 | 245463_at                                    | AT4G17030 | Encodes EXLB1 (expansin-like B1), a member of the expansin family. encodes a protein whose sequence is similar to a 2-oxoglutarate-dependent dioxygenase The mRNA is cell-to-cell mobile.                                                                                                                                                                                                                                                        | 89.78   | 21.09  | 4.26 | 3.30E-06 | 5.45E-05 |
| 1131 | 3 | F2-3 vs. L2-3 | 262637_at                                    | AT1G06640 | encodes a desulfoglucosinolate sulfotransferase, involved in the final step of glucosinolate core structure biosynthesis. Has a broad-substrate specificity with preference with methionine-derived desulfoglucosinolates.                                                                                                                                                                                                                       | 311.41  | 73.90  | 4.21 | 1.65E-05 | 1.69E-04 |
| 1132 | 3 | F2-3 vs. L2-3 | 260385_at                                    | AT1G74090 |                                                                                                                                                                                                                                                                                                                                                                                                                                                  | 185.37  | 44.23  | 4.19 | 1.00E-07 | 4.57E-06 |
| 1133 | 3 | F2-3 vs. L2-3 | 250129_at                                    | AT5G16450 | Ribonuclease E inhibitor RraA/Dimethylmenaquinone methyltransferase;(source:Araport11)                                                                                                                                                                                                                                                                                                                                                           | 464.79  | 111.27 | 4.18 | 1.31E-04 | 7.11E-04 |
| 1134 | 3 | F2-3 vs. L2-3 | 266865_at                                    | AT2G29980 | Endoplasmic reticulum enzyme responsible for the synthesis of 18:3 fatty acids from phospholipids. Uses cytochrome b5 as electron donor.                                                                                                                                                                                                                                                                                                         | 341.10  | 82.18  | 4.15 | 1.38E-05 | 1.50E-04 |
| 1135 | 3 | F2-3 vs. L2-3 | 253387_at                                    | AT4G33010 | glycine decarboxylase P-protein 1;(source:Araport11)                                                                                                                                                                                                                                                                                                                                                                                             | 702.81  | 169.38 | 4.15 | 7.12E-04 | 2.46E-03 |
| 1136 | 3 | F2-3 vs. L2-3 | 256075_at                                    | AT1G18150 | Encodes mitogen-activated protein kinase 8 (MPK8). MPK8 connects protein phosphorylation, Ca2+, and ROS in the wound-signaling pathway.                                                                                                                                                                                                                                                                                                          | 163.99  | 39.62  | 4.14 | 8.48E-05 | 5.24E-04 |
| 1137 | 3 | F2-3 vs. L2-3 | 245745_at                                    | AT1G51110 | localized to chloroplasts                                                                                                                                                                                                                                                                                                                                                                                                                        | 46.80   | 11.37  | 4.12 | 1.50E-06 | 3.34E-05 |

|      |   |               |                 |           |                                                                                                                                                                                                                                                                                                                                                                                                                                                                                                                                                                                                                                                                                                                                                                                                                                                                                                                                                                                                                                                             |        |        |      |          |          |
|------|---|---------------|-----------------|-----------|-------------------------------------------------------------------------------------------------------------------------------------------------------------------------------------------------------------------------------------------------------------------------------------------------------------------------------------------------------------------------------------------------------------------------------------------------------------------------------------------------------------------------------------------------------------------------------------------------------------------------------------------------------------------------------------------------------------------------------------------------------------------------------------------------------------------------------------------------------------------------------------------------------------------------------------------------------------------------------------------------------------------------------------------------------------|--------|--------|------|----------|----------|
| 1138 | 3 | F2-3 vs. L2-3 | 249237_at       | AT5G42050 | Stress responsive asparagine-rich protein. Binds to PevD (Verticillium dahliae ) fungal effector protein. NRP interacts with CRY2, leading to increased cytoplasmic accumulation of CRY2 in a blue light-independent manner (PMID:28633330).NRP also binds FyPP3 and recruits it to endosomes and thus targets it for degradation.                                                                                                                                                                                                                                                                                                                                                                                                                                                                                                                                                                                                                                                                                                                          | 330.93 | 80.23  | 4.12 | 6.88E-05 | 4.51E-04 |
| 1139 | 3 | F2-3 vs. L2-3 | 261713_at       | AT1G32640 | Encodes a MYC-related transcriptional activator with a typical DNA binding domain of a basic helix-loop-helix leucine zipper motif. Binds to an extended G-Box promoter motif and interacts with Jasmonate ZIM-domain proteins. MYC2 interacts with EIN3 and EIL1 to repress hook curvature and resistance to Botrytis cinera.Its transcription is induced by dehydration stress, ABA treatment and blue light via CRY1. Negative regulator of blue light-mediated photomorphogenic growth and blue and far-red-light-regulated gene expression. Positive regulator of lateral root formation. Regulates diverse JA-dependent functions. Negatively regulates Trp metabolism and biosynthesis of Trp-derived secondary metabolites. Positively regulates flavonoid biosynthesis, resistance to insects, and response to oxidative stress. Regulates other transcription factors, and negatively regulates its own expression. For example it binds to and regulates the expression of NST1. Its stability is modulated by PUB10 through polyubiquitination. | 294.50 | 71.58  | 4.11 | 1.70E-06 | 3.64E-05 |
| 1140 | 3 | F2-3 vs. L2-3 | 263477_at       | AT2G31790 | UDP-Glycosyltransferase superfamily protein;(source:Araport11)                                                                                                                                                                                                                                                                                                                                                                                                                                                                                                                                                                                                                                                                                                                                                                                                                                                                                                                                                                                              | 176.84 | 43.05  | 4.11 | < 1e-07  | 4.57E-06 |
| 1141 | 3 | F2-3 vs. L2-3 | 254050_s_a      | AT4G25670 | stress response NST1-like protein;(source:Araport11)                                                                                                                                                                                                                                                                                                                                                                                                                                                                                                                                                                                                                                                                                                                                                                                                                                                                                                                                                                                                        | 265.80 | 64.72  | 4.11 | 6.00E-07 | 1.65E-05 |
| 1142 | 3 | F2-3 vs. L2-3 | 254972_at       | AT4G10440 | S-adenosyl-L-methionine-dependent methyltransferases superfamily protein;(source:Araport11)                                                                                                                                                                                                                                                                                                                                                                                                                                                                                                                                                                                                                                                                                                                                                                                                                                                                                                                                                                 | 63.13  | 15.46  | 4.08 | 7.00E-07 | 1.83E-05 |
| 1143 | 3 | F2-3 vs. L2-3 | 261053_at       | AT1G01320 | Encodes REDUCED CHLOROPLAST COVERAGE 1 (REC1). Located in the nucleus and cytosol. Contributes to establishing the size of the chloroplast compartment.                                                                                                                                                                                                                                                                                                                                                                                                                                                                                                                                                                                                                                                                                                                                                                                                                                                                                                     | 121.34 | 29.82  | 4.07 | 1.41E-05 | 1.52E-04 |
| 1144 | 3 | F2-3 vs. L2-3 | 262680_at       | AT1G75880 | SGNH hydrolase-type esterase superfamily protein;(source:Araport11)                                                                                                                                                                                                                                                                                                                                                                                                                                                                                                                                                                                                                                                                                                                                                                                                                                                                                                                                                                                         | 42.31  | 10.38  | 4.07 | 3.00E-07 | 1.05E-05 |
| 1145 | 3 | F2-3 vs. L2-3 | 263533_at       | AT2G24820 | translocon at the inner envelope membrane of chloroplasts 55-II;(source:Araport11)                                                                                                                                                                                                                                                                                                                                                                                                                                                                                                                                                                                                                                                                                                                                                                                                                                                                                                                                                                          | 171.96 | 42.26  | 4.07 | < 1e-07  | 4.57E-06 |
| 1146 | 3 | F2-3 vs. L2-3 | 266262_at       | AT2G27590 | S-adenosyl-L-methionine-dependent methyltransferases superfamily protein;(source:Araport11)                                                                                                                                                                                                                                                                                                                                                                                                                                                                                                                                                                                                                                                                                                                                                                                                                                                                                                                                                                 | 128.09 | 31.74  | 4.04 | 4.18E-04 | 1.64E-03 |
| 1147 | 3 | F2-3 vs. L2-3 | 249438_at       | AT5G40010 | Encodes a mitochondrial ATPase involved in seed and silique development.                                                                                                                                                                                                                                                                                                                                                                                                                                                                                                                                                                                                                                                                                                                                                                                                                                                                                                                                                                                    | 50.20  | 12.43  | 4.04 | 2.29E-05 | 2.08E-04 |
| 1148 | 3 | F2-3 vs. L2-3 | 259068_at       | AT3G07560 | Encodes peroxin 13 (PEX13) involved in protein transport into peroxisomes, for example, peroxisomal import of nitric oxide synthase.                                                                                                                                                                                                                                                                                                                                                                                                                                                                                                                                                                                                                                                                                                                                                                                                                                                                                                                        | 400.61 | 99.34  | 4.03 | 5.00E-07 | 1.44E-05 |
| 1149 | 3 | F2-3 vs. L2-3 | 253743_at       | AT4G28940 | Phosphorylase superfamily protein;(source:Araport11)                                                                                                                                                                                                                                                                                                                                                                                                                                                                                                                                                                                                                                                                                                                                                                                                                                                                                                                                                                                                        | 696.51 | 172.67 | 4.03 | 5.35E-05 | 3.82E-04 |
| 1150 | 3 | F2-3 vs. L2-3 | 263662_at       | AT1G04430 | S-adenosyl-L-methionine-dependent methyltransferases superfamily protein;(source:Araport11)                                                                                                                                                                                                                                                                                                                                                                                                                                                                                                                                                                                                                                                                                                                                                                                                                                                                                                                                                                 | 202.47 | 50.32  | 4.02 | 4.20E-06 | 6.33E-05 |
| 1151 | 3 | F2-3 vs. L2-3 | 261363_at       | AT1G41830 | SKU5-similar 6;(source:Araport11)                                                                                                                                                                                                                                                                                                                                                                                                                                                                                                                                                                                                                                                                                                                                                                                                                                                                                                                                                                                                                           | 399.06 | 99.35  | 4.02 | 2.21E-04 | 1.03E-03 |
| 1152 | 3 | F2-3 vs. L2-3 | 252971_at       | AT4G38770 | Encodes one of four proline-rich proteins in Arabidopsis which are predicted to localize to the cell wall. Transcripts are most abundant in aerial organs of the plant. Required for the biosynthesis of methionine-derived glucosinolates. Involved in the transport of 2-keto acids between chloroplasts and the cytosol.                                                                                                                                                                                                                                                                                                                                                                                                                                                                                                                                                                                                                                                                                                                                 | 239.16 | 59.51  | 4.02 | 6.80E-05 | 4.47E-04 |
| 1153 | 3 | F2-3 vs. L2-3 | 254862_at       | AT4G12030 | hypothetical protein;(source:Araport11)                                                                                                                                                                                                                                                                                                                                                                                                                                                                                                                                                                                                                                                                                                                                                                                                                                                                                                                                                                                                                     | 100.66 | 25.11  | 4.01 | 1.45E-04 | 7.62E-04 |
| 1154 | 3 | F2-3 vs. L2-3 | 247882_at       | AT5G57785 | Encodes subunit 8 of the mitochondrial F(O) ATP synthase complex.                                                                                                                                                                                                                                                                                                                                                                                                                                                                                                                                                                                                                                                                                                                                                                                                                                                                                                                                                                                           | 355.02 | 88.67  | 4.00 | 7.40E-06 | 9.65E-05 |
| 1155 | 3 | F2-3 vs. L2-3 | 265230_s_a      | ATMG00480 | The At2g36790 gene encodes a UDP-glucose:flavonol-3-O-glycoside-7-O-glucosyltransferase (UGT73C6)attaching a glucosyl residue to the 7-O-position of the flavonols kaempferol, quercetin and their 3-O-glycoside derivatives.                                                                                                                                                                                                                                                                                                                                                                                                                                                                                                                                                                                                                                                                                                                                                                                                                               | 396.85 | 99.55  | 3.99 | 5.76E-05 | 4.02E-04 |
| 1156 | 3 | F2-3 vs. L2-3 | 265200_s_a<br>t | AT2G36790 |                                                                                                                                                                                                                                                                                                                                                                                                                                                                                                                                                                                                                                                                                                                                                                                                                                                                                                                                                                                                                                                             | 84.18  | 21.14  | 3.98 | 6.40E-06 | 8.73E-05 |
| 1157 | 3 | F2-3 vs. L2-3 | 252921_at       | AT4G39030 | Encodes an orphan multidrug and toxin extrusion transporter. Essential component of salicylic acid-dependent signaling for disease resistance. Member of the MATE-transporter family. Expression induced by salicylic acid. Mutants are salicylic acid-deficient.                                                                                                                                                                                                                                                                                                                                                                                                                                                                                                                                                                                                                                                                                                                                                                                           | 154.29 | 38.79  | 3.98 | 3.10E-06 | 5.20E-05 |

|      |   |               |            |           |                                                                                                                                                                                                                                                                                                                                                                                                                                                                                                                                                                                                                                                                                                                                                                                                                                                                                                                                                                                                                                                                                                                                                                                                                                              |        |        |      |          |          |
|------|---|---------------|------------|-----------|----------------------------------------------------------------------------------------------------------------------------------------------------------------------------------------------------------------------------------------------------------------------------------------------------------------------------------------------------------------------------------------------------------------------------------------------------------------------------------------------------------------------------------------------------------------------------------------------------------------------------------------------------------------------------------------------------------------------------------------------------------------------------------------------------------------------------------------------------------------------------------------------------------------------------------------------------------------------------------------------------------------------------------------------------------------------------------------------------------------------------------------------------------------------------------------------------------------------------------------------|--------|--------|------|----------|----------|
| 1158 | 3 | F2-3 vs. L2-3 | 266673_at  | AT2G29630 | Encodes a protein involved in thiamin biosynthesis. The protein is an iron-sulfur cluster protein predicted to catalyze the conversion of 5-aminoimidazole ribonucleotide (AIR) to hydroxymethylpyrimidine (HMP) or hydroxymethylpyrimidine phosphate (HMP-P). A severe reduction of THIC levels in plants decreases vitamin B1 (thiamin diphosphate (TPP)) levels and also leads to changes in the levels of numerous other metabolites since so many primary metabolic enzymes require a TPP co-factor. thiC mutants are chlorotic and arrest in their development at the cotyledon stage. A N-terminal targeting sequence directs the THIC protein to the chloroplast stroma. A conserved TPP-binding site is located in the 3' UTR of the At2g29630.2 gene model, and is predicted to function as a riboswitch. The riboswitch controls the formation of transcripts with alternative 3' UTR lengths, which affect mRNA accumulation and protein production. THIC transcripts are observed in seedlings 5 or more days after germination, and light promotes the expression of this gene. Recessive mutant isolated by Redei. Leaves but not cotyledons white, lethal; restored to normal by thiamine or 2,5-dimethyl-4-aminopyrimidine. | 332.60 | 83.71  | 3.97 | 4.77E-05 | 3.50E-04 |
| 1159 | 3 | F2-3 vs. L2-3 | 245346_at  | AT4G17090 | Encodes a beta-amylase targeted to the chloroplast. Transgenic BMY8 RNAi lines fail to accumulate maltose during cold shock suggesting that maltose accumulation coincides with BMY8 expression. Apart from maltose, the sugar content of the RNAi lines were similar to wildtype (glucose and sucrose unaffected).BAM3 activity declines 2 and 4 days after start of cold stress despite an increase in transcript levels. BAM3 activity has a lower temperature optimum than BAM1 (PMID:25293962).                                                                                                                                                                                                                                                                                                                                                                                                                                                                                                                                                                                                                                                                                                                                         | 154.00 | 38.95  | 3.95 | 2.31E-05 | 2.08E-04 |
| 1160 | 3 | F2-3 vs. L2-3 | 256156_at  | AT3G08510 | Phosphoinositide-specific phospholipase C (PI-PLC), catalyzes hydrolysis of phosphatidylinositol 4,5-bisphosphate into inositol 1,4,5-trisphosphate and diacylglycerol. It is involved in auxin biosynthesis and signaling, modulating development of both male and female gametophytes. It also regulates MAMP-triggered immunity by modulating ROS production.                                                                                                                                                                                                                                                                                                                                                                                                                                                                                                                                                                                                                                                                                                                                                                                                                                                                             | 203.12 | 51.55  | 3.94 | 7.70E-06 | 9.97E-05 |
| 1161 | 3 | F2-3 vs. L2-3 | 257121_at  | AT3G20220 | SAUR-like auxin-responsive protein family;(source:Araport11)                                                                                                                                                                                                                                                                                                                                                                                                                                                                                                                                                                                                                                                                                                                                                                                                                                                                                                                                                                                                                                                                                                                                                                                 | 119.57 | 30.47  | 3.92 | 5.83E-05 | 4.05E-04 |
| 1162 | 3 | F2-3 vs. L2-3 | 252134_at  | AT3G50910 | netrin receptor DCC;(source:Araport11)                                                                                                                                                                                                                                                                                                                                                                                                                                                                                                                                                                                                                                                                                                                                                                                                                                                                                                                                                                                                                                                                                                                                                                                                       | 362.22 | 92.52  | 3.91 | 2.31E-04 | 1.06E-03 |
| 1163 | 3 | F2-3 vs. L2-3 | 249215_at  | AT5G42800 | dihydroflavonol reductase. Catalyzes the conversion of dihydroquercetin to leucocyanidin in the biosynthesis of anthocyanins. Not expressed in roots (qRT-PCR). The mRNA is cell-to-cell mobile.                                                                                                                                                                                                                                                                                                                                                                                                                                                                                                                                                                                                                                                                                                                                                                                                                                                                                                                                                                                                                                             | 60.05  | 15.34  | 3.91 | 9.00E-06 | 1.11E-04 |
| 1164 | 3 | F2-3 vs. L2-3 | 245306_at  | AT4G14690 | Encodes an early light-induced protein. ELIPs are thought not to be directly involved in the synthesis and assembly of specific photosynthetic complexes, but rather affect the biogenesis of all chlorophyll-binding complexes. A study (PMID 17553115) has shown that the chlorophyll synthesis pathway was downregulated as a result of constitutive ELIP2 expression, leading to decreased chlorophyll availability for the assembly of pigment-binding proteins for photosynthesis.                                                                                                                                                                                                                                                                                                                                                                                                                                                                                                                                                                                                                                                                                                                                                     | 304.76 | 78.44  | 3.89 | 2.00E-07 | 7.75E-06 |
| 1165 | 3 | F2-3 vs. L2-3 | 266184_s_a | AT3G54700 | Encodes Pht1;7, a member of the Pht1 family of phosphate transporters which include: Pht1;1/At5g43350, Pht1;2/At5g43370, Pht1;3/At5g43360, Pht1;4/At2g38940, Pht1;5/At2g32830, Pht1;6/At5g43340, Pht1;7/At3g54700, Pht1;8/At1g20860, Pht1;9/At1g76430 (Plant Journal 2002, 31:341).                                                                                                                                                                                                                                                                                                                                                                                                                                                                                                                                                                                                                                                                                                                                                                                                                                                                                                                                                          | 74.51  | 19.20  | 3.88 | 1.05E-05 | 1.22E-04 |
| 1166 | 3 | F2-3 vs. L2-3 | 264603_at  | AT1G04670 | hypothetical protein;(source:Araport11)                                                                                                                                                                                                                                                                                                                                                                                                                                                                                                                                                                                                                                                                                                                                                                                                                                                                                                                                                                                                                                                                                                                                                                                                      | 39.66  | 10.26  | 3.86 | 1.00E-07 | 4.57E-06 |
| 1167 | 3 | F2-3 vs. L2-3 | 251649_at  | AT3G57330 | Lesion mimic phenotype when mutation in the gene is combined with a mutation in ACA4. Lesion mimic phenotype of double knockout can be suppressed by nutritional supplements that increase anion levels (e.g. 15 mM Nitrate, Chloride, or Phosphate)                                                                                                                                                                                                                                                                                                                                                                                                                                                                                                                                                                                                                                                                                                                                                                                                                                                                                                                                                                                         | 140.27 | 36.36  | 3.86 | 2.50E-06 | 4.58E-05 |
| 1168 | 3 | F2-3 vs. L2-3 | 248573_at  | AT5G49720 | Encodes a membrane-bound endo-1,4-beta-D-glucanase, involved in cellulose biosynthesis. Loss-of-function mutants have severe cellulose-deficient phenotypes. During cell elongation, KOR1 is associated with Golgi apparatus and early endosome. Inhibition of cellulose biosynthesis promoted a redistribution of KOR1 in subcellular locations. These observations suggest that deposition of cellulose involves the intracellular cycling of KOR1.                                                                                                                                                                                                                                                                                                                                                                                                                                                                                                                                                                                                                                                                                                                                                                                        | 682.03 | 176.46 | 3.86 | < 1e-07  | 4.57E-06 |
| 1169 | 3 | F2-3 vs. L2-3 | 260805_at  | AT1G78320 | Encodes glutathione transferase belonging to the tau class of GSTs. Naming convention according to Wagner et al. (2002).                                                                                                                                                                                                                                                                                                                                                                                                                                                                                                                                                                                                                                                                                                                                                                                                                                                                                                                                                                                                                                                                                                                     | 116.96 | 30.38  | 3.85 | 2.38E-04 | 1.08E-03 |

|      |   |               |            |           |                                                                                                                                                                                                                                                                                                                                                                                                                                                                                                                                                                                                                                                    |         |        |      |          |          |
|------|---|---------------|------------|-----------|----------------------------------------------------------------------------------------------------------------------------------------------------------------------------------------------------------------------------------------------------------------------------------------------------------------------------------------------------------------------------------------------------------------------------------------------------------------------------------------------------------------------------------------------------------------------------------------------------------------------------------------------------|---------|--------|------|----------|----------|
|      |   |               |            |           | Transcription regulator acting as repressor of auxin-inducible gene expression. Plays role in the control of gravitropic growth and development in light-grown seedlings. Auxin induces the degradation of the protein in a dosage-dependent manner in a process mediated by AtRac1. Auxin induced the relocalization of the protein within the nucleus from a diffused nucleoplasmic pattern to a discrete particulated pattern named nuclear protein bodies or NPB in a process also mediated by Rac1. Colocalizes with SCF, CSN and 26S proteasome components. Pseudomonas syringae type III effector AvrRpt2 stimulates AXR2 protein turnover. |         |        |      |          |          |
| 1170 | 3 | F2-3 vs. L2-3 | 257769_at  | AT3G23050 | S-adenosylmethionine synthetase 2;(source:Araport11)                                                                                                                                                                                                                                                                                                                                                                                                                                                                                                                                                                                               | 82.07   | 21.47  | 3.82 | 1.00E-07 | 4.57E-06 |
| 1171 | 3 | F2-3 vs. L2-3 | 255552_at  | AT4G01850 | DNA binding / transcription factor;(source:Araport11)                                                                                                                                                                                                                                                                                                                                                                                                                                                                                                                                                                                              | 986.13  | 258.42 | 3.82 | 1.47E-04 | 7.67E-04 |
| 1172 | 3 | F2-3 vs. L2-3 | 262917_at  | AT1G64800 | Calcium-binding EF-hand family protein;(source:Araport11)                                                                                                                                                                                                                                                                                                                                                                                                                                                                                                                                                                                          | 50.26   | 13.18  | 3.81 | 3.13E-05 | 2.58E-04 |
| 1173 | 3 | F2-3 vs. L2-3 | 259044_at  | AT3G03430 |                                                                                                                                                                                                                                                                                                                                                                                                                                                                                                                                                                                                                                                    | 47.83   | 12.58  | 3.80 | 6.11E-05 | 4.19E-04 |
|      |   |               |            |           | Encodes a UDP-D-glucuronate 4-epimerase involved in pectin biosynthesis in the cell wall and affects cell wall integrity and immunity to fungi and bacteria. The mRNA is cell-to-cell mobile. Nuclear transcribed, plastid localized EF-Tu translation elongation factor. Referred to as AtRabE1b in DOI:10.1104/pp.013052. However, wider community usage and more publications assign the symbol RabE1b to At5g59840.                                                                                                                                                                                                                            | 75.83   | 20.05  | 3.78 | 1.60E-06 | 3.46E-05 |
| 1174 | 3 | F2-3 vs. L2-3 | 256865_at  | AT3G23820 |                                                                                                                                                                                                                                                                                                                                                                                                                                                                                                                                                                                                                                                    |         |        |      |          |          |
| 1175 | 3 | F2-3 vs. L2-3 | 254480_at  | AT4G20360 | MATE efflux family protein;(source:Araport11)                                                                                                                                                                                                                                                                                                                                                                                                                                                                                                                                                                                                      | 267.88  | 70.99  | 3.77 | < 1e-07  | < 1e-07  |
| 1176 | 3 | F2-3 vs. L2-3 | 262432_at  | AT1G47530 | B-S glucosidase 44;(source:Araport11)                                                                                                                                                                                                                                                                                                                                                                                                                                                                                                                                                                                                              | 187.62  | 49.84  | 3.76 | 2.50E-06 | 4.58E-05 |
| 1177 | 3 | F2-3 vs. L2-3 | 258151_at  | AT3G18080 |                                                                                                                                                                                                                                                                                                                                                                                                                                                                                                                                                                                                                                                    | 59.69   | 15.92  | 3.75 | 3.60E-06 | 5.76E-05 |
|      |   |               |            |           | Encodes a S-adenosylmethionine decarboxylase involved in polyamine biosynthesis. Acetamidase/Formamidase family protein;(source:Araport11)                                                                                                                                                                                                                                                                                                                                                                                                                                                                                                         | 646.92  | 172.84 | 3.74 | 5.00E-07 | 1.44E-05 |
| 1178 | 3 | F2-3 vs. L2-3 | 258500_at  | AT3G02470 | Encodes QUASIMODO2 LIKE1 (QUL1), a paralog of QUASIMODO2 (QUA2). AT1G78240 (QUA2), AT1G13860 (QUL1) and AT2G03480 (QUL2) form a clade with a possible role in plant vasculature development.                                                                                                                                                                                                                                                                                                                                                                                                                                                       | 51.36   | 13.77  | 3.73 | 2.80E-06 | 4.91E-05 |
| 1179 | 3 | F2-3 vs. L2-3 | 253048_at  | AT4G37560 |                                                                                                                                                                                                                                                                                                                                                                                                                                                                                                                                                                                                                                                    |         |        |      |          |          |
|      |   |               | 265715_s_a |           | Encodes a chloroplast beta-amylase. Is necessary for leaf starch breakdown in the absence of BAM3.Activity of BAM1 increases 4 days after osmotic stress. BAM1 has a higher temperature optimum than BAM3 (PMID:25293962).                                                                                                                                                                                                                                                                                                                                                                                                                         |         |        |      |          |          |
| 1180 | 3 | F2-3 vs. L2-3 | t          | AT1G13860 | Pectinacetylsterase family protein;(source:Araport11)                                                                                                                                                                                                                                                                                                                                                                                                                                                                                                                                                                                              | 43.77   | 11.78  | 3.72 | 2.70E-06 | 4.78E-05 |
|      |   |               |            |           | Target promoter of the male germline-specific transcription factor DUO1.                                                                                                                                                                                                                                                                                                                                                                                                                                                                                                                                                                           |         |        |      |          |          |
| 1181 | 3 | F2-3 vs. L2-3 | 256861_at  | AT3G23920 | B-box type zinc finger family protein;(source:Araport11)                                                                                                                                                                                                                                                                                                                                                                                                                                                                                                                                                                                           | 513.13  | 137.99 | 3.72 | 1.40E-06 | 3.16E-05 |
| 1182 | 3 | F2-3 vs. L2-3 | 248968_at  | AT5G45280 | Pectin lyase-like superfamily protein;(source:Araport11)                                                                                                                                                                                                                                                                                                                                                                                                                                                                                                                                                                                           | 324.02  | 87.17  | 3.72 | 1.50E-05 | 1.58E-04 |
| 1183 | 3 | F2-3 vs. L2-3 | 262282_at  | AT1G68610 | MATE efflux family protein;(source:Araport11)                                                                                                                                                                                                                                                                                                                                                                                                                                                                                                                                                                                                      | 52.88   | 14.25  | 3.71 | 1.10E-06 | 2.61E-05 |
| 1184 | 3 | F2-3 vs. L2-3 | 257262_at  | AT3G21890 |                                                                                                                                                                                                                                                                                                                                                                                                                                                                                                                                                                                                                                                    | 481.69  | 130.43 | 3.69 | 5.41E-05 | 3.85E-04 |
| 1185 | 3 | F2-3 vs. L2-3 | 257886_at  | AT3G17060 |                                                                                                                                                                                                                                                                                                                                                                                                                                                                                                                                                                                                                                                    | 164.25  | 44.59  | 3.68 | 9.80E-06 | 1.17E-04 |
| 1186 | 3 | F2-3 vs. L2-3 | 248643_at  | AT5G49130 |                                                                                                                                                                                                                                                                                                                                                                                                                                                                                                                                                                                                                                                    | 248.54  | 67.60  | 3.68 | 3.05E-05 | 2.54E-04 |
|      |   |               |            |           | S-adenosyl-L-methionine-dependent methyltransferases superfamily protein;(source:Araport11)                                                                                                                                                                                                                                                                                                                                                                                                                                                                                                                                                        | 78.24   | 21.31  | 3.67 | 4.20E-06 | 6.33E-05 |
| 1187 | 3 | F2-3 vs. L2-3 | 261593_at  | AT1G33170 | Major facilitator superfamily protein;(source:Araport11)                                                                                                                                                                                                                                                                                                                                                                                                                                                                                                                                                                                           | 80.09   | 21.81  | 3.67 | 1.09E-05 | 1.25E-04 |
| 1188 | 3 | F2-3 vs. L2-3 | 255877_at  | AT2G40460 | Encodes a serine hydroxymethyltransferase maximally expressed in root                                                                                                                                                                                                                                                                                                                                                                                                                                                                                                                                                                              | 2185.38 | 595.02 | 3.67 | 1.00E-07 | 4.57E-06 |
| 1189 | 3 | F2-3 vs. L2-3 | 254740_s_a | AT4G13930 | desiccation-like protein;(source:Araport11)                                                                                                                                                                                                                                                                                                                                                                                                                                                                                                                                                                                                        | 99.38   | 27.23  | 3.65 | 2.90E-06 | 5.02E-05 |
| 1190 | 3 | F2-3 vs. L2-3 | 259615_at  | AT1G47980 | ortholog of sugar beet HS1 PRO-1 2;(source:Araport11)                                                                                                                                                                                                                                                                                                                                                                                                                                                                                                                                                                                              | 431.13  | 118.36 | 3.64 | 2.10E-06 | 4.08E-05 |
| 1191 | 3 | F2-3 vs. L2-3 | 267357_at  | AT2G40000 | hemolysin-III related integral membrane protein;(source:Araport11)                                                                                                                                                                                                                                                                                                                                                                                                                                                                                                                                                                                 | 382.99  | 105.43 | 3.63 | 1.03E-05 | 1.21E-04 |
| 1192 | 3 | F2-3 vs. L2-3 | 266075_s_a | AT2G40710 |                                                                                                                                                                                                                                                                                                                                                                                                                                                                                                                                                                                                                                                    |         |        |      |          |          |
|      |   |               |            |           | encodes a protein whose sequence is similar to tobacco hairpin-induced gene (HIN1) and Arabidopsis non-race specific disease resistance gene (NDR1). Expression of this gene is induced by cucumber mosaic virus, spermine and Pseudomonas syringae pv. tomato DC3000. The gene product is localized to the plasma membrane.                                                                                                                                                                                                                                                                                                                       |         |        |      |          |          |
| 1193 | 3 | F2-3 vs. L2-3 | 250676_at  | AT5G06320 |                                                                                                                                                                                                                                                                                                                                                                                                                                                                                                                                                                                                                                                    | 379.50  | 104.41 | 3.63 | 6.53E-04 | 2.30E-03 |
|      |   |               |            |           | Encodes an ABA- and drought-induced RING-DUF1117 gene whose mutation results in hyposensitive phenotypes toward ABA in terms of germination rate and stomatal closure and markedly reduced tolerance to drought stress relative to wild-type plants.                                                                                                                                                                                                                                                                                                                                                                                               | 551.92  | 152.53 | 3.62 | 3.04E-04 | 1.31E-03 |
| 1194 | 3 | F2-3 vs. L2-3 | 252474_at  | AT3G46620 | ChaC-like family protein;(source:Araport11)                                                                                                                                                                                                                                                                                                                                                                                                                                                                                                                                                                                                        | 373.58  | 104.57 | 3.57 | 1.30E-06 | 3.01E-05 |
| 1195 | 3 | F2-3 vs. L2-3 | 253522_at  | AT4G31290 | lysine-sensitive aspartate kinase                                                                                                                                                                                                                                                                                                                                                                                                                                                                                                                                                                                                                  | 632.68  | 177.36 | 3.57 | 1.51E-04 | 7.85E-04 |
| 1196 | 3 | F2-3 vs. L2-3 | 258977_s_a | AT5G14060 | Calcium-dependent phosphotriesterase superfamily protein;(source:Araport11)                                                                                                                                                                                                                                                                                                                                                                                                                                                                                                                                                                        | 155.98  | 43.77  | 3.56 | 1.34E-04 | 7.21E-04 |
| 1197 | 3 | F2-3 vs. L2-3 | 251658_at  | AT3G57020 |                                                                                                                                                                                                                                                                                                                                                                                                                                                                                                                                                                                                                                                    |         |        |      |          |          |
|      |   |               |            |           | Encodes one of eight Arabidopsis actins. ACT4 belongs to the reproductive actin subclass which is predominantly expressed in developing and reproductive tissues, such as pollen, pollen tubes, ovules, and developing seeds. Expression of the ACT4/GUS fusion was restricted to young vascular tissues, tapetum, and developing and mature pollen.                                                                                                                                                                                                                                                                                               |         |        |      |          |          |
| 1198 | 3 | F2-3 vs. L2-3 | 247736_at  | AT5G59370 |                                                                                                                                                                                                                                                                                                                                                                                                                                                                                                                                                                                                                                                    | 50.78   | 14.27  | 3.56 | 1.49E-05 | 1.58E-04 |



|      |   |               |           |           |                                                                                                                                                                                                                                                                                                                                                                                                                                                                                                                                                                                                                                                                                                                                                                                                                                                                               |         |        |      |          |          |
|------|---|---------------|-----------|-----------|-------------------------------------------------------------------------------------------------------------------------------------------------------------------------------------------------------------------------------------------------------------------------------------------------------------------------------------------------------------------------------------------------------------------------------------------------------------------------------------------------------------------------------------------------------------------------------------------------------------------------------------------------------------------------------------------------------------------------------------------------------------------------------------------------------------------------------------------------------------------------------|---------|--------|------|----------|----------|
| 1199 | 3 | F2-3 vs. L2-3 | 267470_at | AT2G30490 | Encodes a cinnamate-4-hydroxylase. Mutations in this gene impact phenylpropanoid metabolism, growth and development.                                                                                                                                                                                                                                                                                                                                                                                                                                                                                                                                                                                                                                                                                                                                                          | 174.73  | 49.17  | 3.55 | 2.20E-06 | 4.25E-05 |
| 1200 | 3 | F2-3 vs. L2-3 | 262344_at | AT1G64060 | Interacts with AtrbohD gene to fine tune the spatial control of ROI production and hypersensitive response to cell in and around infection site.                                                                                                                                                                                                                                                                                                                                                                                                                                                                                                                                                                                                                                                                                                                              | 189.87  | 53.66  | 3.54 | 1.90E-06 | 3.89E-05 |
| 1201 | 3 | F2-3 vs. L2-3 | 255580_at | AT4G01470 | Encodes AtTIP1;3, functions as water and urea channels in pollen.                                                                                                                                                                                                                                                                                                                                                                                                                                                                                                                                                                                                                                                                                                                                                                                                             | 236.80  | 66.92  | 3.54 | 1.41E-04 | 7.49E-04 |
| 1202 | 3 | F2-3 vs. L2-3 | 262998_at | AT1G54280 | Encodes a member of the P4 subfamily of P-type ATPases expressed in the pollen plasma membrane. Double mutants with ALA7 display pollen and pollen tube defects.                                                                                                                                                                                                                                                                                                                                                                                                                                                                                                                                                                                                                                                                                                              | 50.20   | 14.23  | 3.53 | 4.63E-05 | 3.43E-04 |
| 1203 | 3 | F2-3 vs. L2-3 | 262707_at | AT1G16290 | transglycosylase;(source:Araport11)                                                                                                                                                                                                                                                                                                                                                                                                                                                                                                                                                                                                                                                                                                                                                                                                                                           | 137.26  | 39.10  | 3.51 | 3.26E-04 | 1.37E-03 |
| 1204 | 3 | F2-3 vs. L2-3 | 264112_at | AT2G13680 | Responsible for the synthesis of callose deposited at the primary cell wall of meiocytes, tetrads and microspores. Required for exine formation during microgametogenesis and for pollen viability. Highest expression in meiocytes, tetrads, microspores and mature pollen.                                                                                                                                                                                                                                                                                                                                                                                                                                                                                                                                                                                                  | 192.07  | 54.75  | 3.51 | 6.27E-04 | 2.23E-03 |
| 1205 | 3 | F2-3 vs. L2-3 | 261722_at | AT1G08510 | Encodes an acyl-acyl carrier protein thioesterase. Hydrolyzes primarily saturated acyl-ACPs with chain lengths that vary between 8 and 18 carbons. Involved in saturated fatty acid synthesis.                                                                                                                                                                                                                                                                                                                                                                                                                                                                                                                                                                                                                                                                                | 244.82  | 69.89  | 3.50 | 1.00E-07 | 4.57E-06 |
| 1206 | 3 | F2-3 vs. L2-3 | 264394_at | AT1G11860 | Nuclear-encoded, plastid-targeted globular protein that is functional as dimer. Glycine cleavage T-protein family;(source:Araport11)                                                                                                                                                                                                                                                                                                                                                                                                                                                                                                                                                                                                                                                                                                                                          | 1043.89 | 298.26 | 3.50 | 3.83E-04 | 1.54E-03 |
| 1207 | 3 | F2-3 vs. L2-3 | 252870_at | AT4G39940 | adenosine-5'-phosphosulfate-kinase (akn2) mRNA, complete The mRNA is cell-to-cell mobile.                                                                                                                                                                                                                                                                                                                                                                                                                                                                                                                                                                                                                                                                                                                                                                                     | 64.39   | 18.42  | 3.50 | 2.00E-07 | 7.75E-06 |
| 1208 | 3 | F2-3 vs. L2-3 | 265587_at | AT2G19980 | CAP (Cysteine-rich secretory proteins, Antigen 5, and Pathogenesis-related 1 protein) superfamily protein;(source:Araport11)                                                                                                                                                                                                                                                                                                                                                                                                                                                                                                                                                                                                                                                                                                                                                  | 63.60   | 18.22  | 3.49 | 1.62E-04 | 8.26E-04 |
| 1209 | 3 | F2-3 vs. L2-3 | 260568_at | AT2G43570 | chitinase;(source:Araport11)                                                                                                                                                                                                                                                                                                                                                                                                                                                                                                                                                                                                                                                                                                                                                                                                                                                  | 50.12   | 14.35  | 3.49 | 1.48E-05 | 1.57E-04 |
| 1210 | 3 | F2-3 vs. L2-3 | 252543_at | AT3G45780 | Blue-light photoreceptor. Contains a light activated serine-threonine kinase domain and LOV1 and LOV2 repeats. Mutants are defective in blue-light response. Mediates blue light-induced growth enhancements. PHOT1 and PHOT2 mediate blue light-dependent activation of the plasma membrane H <sup>+</sup> -ATPase in guard cell protoplasts. PHOT1 undergoes blue-light-dependent autophosphorylation. At least eight phosphorylation sites have been identified in PHOT1. Phosphorylation of serine851 in the activation loop of PHOT1 appears to be required for stomatal opening, chloroplast accumulation, leaf flattening, and phototropism, and phosphorylation of serine849 may also contribute to the regulation of these responses. Phosphorylation-dependent binding of 14-3-3 proteins to the Hinge1 region of PHOT1 appears to require serine350 and serine376. | 62.55   | 17.91  | 3.49 | 3.30E-05 | 2.67E-04 |
| 1211 | 3 | F2-3 vs. L2-3 | 265073_at | AT1G55480 | Encodes a member of a novel plant protein family containing a PDZ, a K-box, and a TPR motif. mRNA but not protein levels decrease after wounding. ZKT is phosphorylated at Thr and Ser residues after wounding. The mRNA is cell-to-cell mobile.                                                                                                                                                                                                                                                                                                                                                                                                                                                                                                                                                                                                                              | 352.19  | 101.18 | 3.48 | 3.00E-06 | 5.09E-05 |
| 1212 | 3 | F2-3 vs. L2-3 | 247161_at | AT5G65810 | Encodes CGR3 (cotton Golgi-related 3). CGR3 and a close homologue CGR2 have overlapping roles in pectin methylesterification and plant growth.                                                                                                                                                                                                                                                                                                                                                                                                                                                                                                                                                                                                                                                                                                                                | 582.57  | 168.10 | 3.47 | 9.00E-07 | 2.22E-05 |
| 1213 | 3 | F2-3 vs. L2-3 | 259520_at | AT1G12320 | ankyrin repeat/KH domain protein (DUF1442);(source:Araport11)                                                                                                                                                                                                                                                                                                                                                                                                                                                                                                                                                                                                                                                                                                                                                                                                                 | 48.39   | 14.02  | 3.45 | 3.10E-06 | 5.20E-05 |
| 1214 | 3 | F2-3 vs. L2-3 | 260632_at | AT1G62360 | Class I knotted-like homeodomain protein that is required for shoot apical meristem (SAM) formation during embryogenesis and for SAM function throughout the lifetime of the plant. Functions by preventing incorporation of cells in the meristem center into differentiating organ primordia. It has also been shown to have a role in the specification of flower meristem identity.                                                                                                                                                                                                                                                                                                                                                                                                                                                                                       | 95.79   | 27.90  | 3.43 | 2.40E-06 | 4.54E-05 |
| 1215 | 3 | F2-3 vs. L2-3 | 260309_at | AT1G70580 | Encodes a protein with glyoxylate aminotransferase activity. It can act on a number of different small substrates and amino acids in vitro.                                                                                                                                                                                                                                                                                                                                                                                                                                                                                                                                                                                                                                                                                                                                   | 398.17  | 116.02 | 3.43 | 1.73E-05 | 1.75E-04 |
| 1216 | 3 | F2-3 vs. L2-3 | 248153_at | AT5G54250 | member of Cyclic nucleotide gated channel family, downstream component of the signaling pathways leading to HR resistance. mutant plants exhibit gene-for-gene disease resistance against avirulent Pseudomonas syringae despite the near-complete absence of the hypersensitive response (HR). Salicylic acid accumulation in dnd2 mutants is completely PAD4-independent.                                                                                                                                                                                                                                                                                                                                                                                                                                                                                                   | 84.97   | 24.76  | 3.43 | 2.30E-06 | 4.39E-05 |
| 1217 | 3 | F2-3 vs. L2-3 | 265022_at | AT1G24520 | Male fertility gene acting on tapetum and microspore                                                                                                                                                                                                                                                                                                                                                                                                                                                                                                                                                                                                                                                                                                                                                                                                                          | 263.93  | 77.32  | 3.41 | 2.08E-04 | 9.86E-04 |

|      |   |               |           |           |                                                                                                                                                                                                                                                                                                                                                                                                                                                                                                                                                                                                                                                                                                                                                                                                                                                                                                                                                                                                                                                                                                                                                                                                                                                                                                                                                     |         |        |      |          |          |
|------|---|---------------|-----------|-----------|-----------------------------------------------------------------------------------------------------------------------------------------------------------------------------------------------------------------------------------------------------------------------------------------------------------------------------------------------------------------------------------------------------------------------------------------------------------------------------------------------------------------------------------------------------------------------------------------------------------------------------------------------------------------------------------------------------------------------------------------------------------------------------------------------------------------------------------------------------------------------------------------------------------------------------------------------------------------------------------------------------------------------------------------------------------------------------------------------------------------------------------------------------------------------------------------------------------------------------------------------------------------------------------------------------------------------------------------------------|---------|--------|------|----------|----------|
| 1218 | 3 | F2-3 vs. L2-3 | 245253_at | AT4G15440 | Encodes a hydroperoxide lyase. Also a member of the CYP74B cytochrome p450 family. In the ecotype Columbia (Col) the gene contains a 10-nucleotide deletion in its first exon that causes it to code for a truncated protein that results in a non-functional hydroperoxide lyase.                                                                                                                                                                                                                                                                                                                                                                                                                                                                                                                                                                                                                                                                                                                                                                                                                                                                                                                                                                                                                                                                  | 136.07  | 39.95  | 3.41 | 1.90E-06 | 3.89E-05 |
| 1219 | 3 | F2-3 vs. L2-3 | 247884_at | AT5G57800 | encodes a transmembrane protein with similarity to the sterol desaturase family at the N-terminus and to the short-chain dehydrogenase/reductase family at the C-terminus. Mutant analyses indicate this protein is involved in cuticle membrane and wax biosynthesis. The mRNA is cell-to-cell mobile.                                                                                                                                                                                                                                                                                                                                                                                                                                                                                                                                                                                                                                                                                                                                                                                                                                                                                                                                                                                                                                             | 104.26  | 30.77  | 3.39 | 4.98E-04 | 1.87E-03 |
| 1220 | 3 | F2-3 vs. L2-3 | 255719_at | AT1G32080 | Encodes a plant LrgAB/CidAB protein localized to the chloroplast envelope that is involved in chloroplast development, carbon partitioning, ABA/drought response, and leaf senescence. The gene may have evolved from gene fusion of bacterial lrgA and lrgB.                                                                                                                                                                                                                                                                                                                                                                                                                                                                                                                                                                                                                                                                                                                                                                                                                                                                                                                                                                                                                                                                                       | 77.64   | 22.95  | 3.38 | 3.00E-06 | 5.09E-05 |
| 1221 | 3 | F2-3 vs. L2-3 | 265441_at | AT2G20870 | cell wall protein precursor;(source:Araport11)                                                                                                                                                                                                                                                                                                                                                                                                                                                                                                                                                                                                                                                                                                                                                                                                                                                                                                                                                                                                                                                                                                                                                                                                                                                                                                      | 70.86   | 20.95  | 3.38 | 6.00E-07 | 1.65E-05 |
| 1222 | 3 | F2-3 vs. L2-3 | 257749_at | AT3G18780 | Encodes an actin that is constitutively expressed in vegetative structures but not pollen. ACT2 is involved in tip growth of root hairs.                                                                                                                                                                                                                                                                                                                                                                                                                                                                                                                                                                                                                                                                                                                                                                                                                                                                                                                                                                                                                                                                                                                                                                                                            | 1619.99 | 478.86 | 3.38 | 3.00E-06 | 5.09E-05 |
| 1223 | 3 | F2-3 vs. L2-3 | 263553_at | AT2G16430 | Encodes an acid phosphatase involved plant acclimation to Pi deprivation.                                                                                                                                                                                                                                                                                                                                                                                                                                                                                                                                                                                                                                                                                                                                                                                                                                                                                                                                                                                                                                                                                                                                                                                                                                                                           | 165.83  | 49.21  | 3.37 | 1.21E-04 | 6.71E-04 |
| 1224 | 3 | F2-3 vs. L2-3 | 263012_at | AT1G23380 | homeodomain transcription factor KNAT6, belonging to class I of KN transcription factor family (which also includes KNAT1 and KNAT2). Expression is increased in as and bop1 leaf mutants.                                                                                                                                                                                                                                                                                                                                                                                                                                                                                                                                                                                                                                                                                                                                                                                                                                                                                                                                                                                                                                                                                                                                                          | 48.40   | 14.45  | 3.35 | 1.98E-05 | 1.89E-04 |
| 1225 | 3 | F2-3 vs. L2-3 | 264851_at | AT2G17290 | Encodes calcium dependent protein kinase 6 (CPK6), a member of the Arabidopsis CDPK gene family. CDPKs contain an intrinsic Ca2+-activation domain with four EF hand Ca2+-binding sites. CDPKs protein kinases have been proposed to function in multiple plant signal transduction pathways downstream of [Ca2+]cyt elevations, thus transducing various physiological responses. CPK6 is expressed in both guard cells and mesophyll cells. Functions in guard cell ion channel regulation. ABA and Ca(2+) activation of slow-type anion channels and, interestingly, ABA activation of plasma membrane Ca(2+)-permeable channels were impaired in independent alleles of single and double cpk3cpk6 mutant guard cells. Furthermore, ABA- and Ca(2+)-induced stomatal closing were partially impaired in these cpk3cpk6 mutant alleles. The protein kinase CPK6 is shown in biochemical assays to be directly activated by elevations in calcium concentrations in the physiological range (Laanemets et al., 2013 PlantPhys.; PMID: 23766366). These data correlate with the in vivo function of CPK6 in Ca2+ and ABA activation of S-type anion channels (Mori et al., 2006 PLoS Biol.; PMID: 17032064) and the ability of CPK6 to mediate ABA activation of SLAC1 (Brandt et al., 2012 PNAS; PMID: 22689970).The mRNA is cell-to-cell mobile. | 145.31  | 43.57  | 3.34 | 3.91E-04 | 1.56E-03 |
| 1226 | 3 | F2-3 vs. L2-3 | 257650_at | AT3G16800 | EGR3 functions as a negative regulator of plant growth with prominent effect on plant growth during drought stress, EGR3 regulates microtubule organization and likely affects additional cytoskeleton and trafficking processes along the plasma membrane.                                                                                                                                                                                                                                                                                                                                                                                                                                                                                                                                                                                                                                                                                                                                                                                                                                                                                                                                                                                                                                                                                         | 78.84   | 23.62  | 3.34 | 6.00E-06 | 8.44E-05 |
| 1227 | 3 | F2-3 vs. L2-3 | 250824_at | AT5G05200 | Protein kinase superfamily protein;(source:Araport11)                                                                                                                                                                                                                                                                                                                                                                                                                                                                                                                                                                                                                                                                                                                                                                                                                                                                                                                                                                                                                                                                                                                                                                                                                                                                                               | 216.48  | 64.88  | 3.34 | 2.00E-07 | 7.75E-06 |
| 1228 | 3 | F2-3 vs. L2-3 | 246596_at | AT5G14740 | Encodes a beta carbonic anhydrase likely to be localized in the cytoplasm. Expression of its mRNA is seen in etiolated seedlings and points to a possible nonphotosynthetic role for this isoform. Encodes SMALLER WITH VARIABLE BRANCHES (SVB), a protein with a conserved domain of unknown function (DUF538). The trichomes of the SVB mutants are smaller and exhibit branches of variable length and number.                                                                                                                                                                                                                                                                                                                                                                                                                                                                                                                                                                                                                                                                                                                                                                                                                                                                                                                                   | 59.24   | 17.81  | 3.33 | 4.00E-07 | 1.25E-05 |
| 1229 | 3 | F2-3 vs. L2-3 | 245629_at | AT1G56580 | Encodes glutathione transferase belonging to the phi class of GSTs. Naming convention according to Wagner et al. (2002).                                                                                                                                                                                                                                                                                                                                                                                                                                                                                                                                                                                                                                                                                                                                                                                                                                                                                                                                                                                                                                                                                                                                                                                                                            | 319.73  | 96.18  | 3.32 | 2.00E-07 | 7.75E-06 |
| 1230 | 3 | F2-3 vs. L2-3 | 267153_at | AT2G30860 | Sucrose-6F-phosphate phosphohydrolase family protein;(source:Araport11)                                                                                                                                                                                                                                                                                                                                                                                                                                                                                                                                                                                                                                                                                                                                                                                                                                                                                                                                                                                                                                                                                                                                                                                                                                                                             | 1797.23 | 541.52 | 3.32 | 3.07E-05 | 2.55E-04 |
| 1231 | 3 | F2-3 vs. L2-3 | 263954_at | AT2G35840 | lysine-tRNA ligase;(source:Araport11)                                                                                                                                                                                                                                                                                                                                                                                                                                                                                                                                                                                                                                                                                                                                                                                                                                                                                                                                                                                                                                                                                                                                                                                                                                                                                                               | 1001.90 | 301.98 | 3.32 | 3.00E-07 | 1.05E-05 |
| 1232 | 3 | F2-3 vs. L2-3 | 259275_at | AT3G01060 | C2H2-like zinc finger protein;(source:Araport11)                                                                                                                                                                                                                                                                                                                                                                                                                                                                                                                                                                                                                                                                                                                                                                                                                                                                                                                                                                                                                                                                                                                                                                                                                                                                                                    | 208.47  | 62.73  | 3.32 | 5.00E-07 | 1.44E-05 |
| 1233 | 3 | F2-3 vs. L2-3 | 260997_at | AT1G26610 | belongs to the flavin-monooxygenase (FMO) family, encodes a glucosinolate S-oxygenase that catalyzes the conversion of methylthioalkyl glucosinolates to methylsulfinylalkyl glucosinolates The mRNA is cell-to-cell mobile.                                                                                                                                                                                                                                                                                                                                                                                                                                                                                                                                                                                                                                                                                                                                                                                                                                                                                                                                                                                                                                                                                                                        | 171.15  | 51.77  | 3.31 | 8.00E-07 | 2.05E-05 |
| 1234 | 3 | F2-3 vs. L2-3 | 265119_at | AT1G62570 | Plant invertase/pectin methylesterase inhibitor superfamily;(source:Araport11)                                                                                                                                                                                                                                                                                                                                                                                                                                                                                                                                                                                                                                                                                                                                                                                                                                                                                                                                                                                                                                                                                                                                                                                                                                                                      | 86.67   | 26.26  | 3.30 | 1.90E-05 | 1.85E-04 |
| 1235 | 3 | F2-3 vs. L2-3 | 252740_at | AT3G43270 | UDP-glucosyl transferase 76E11;(source:Araport11)                                                                                                                                                                                                                                                                                                                                                                                                                                                                                                                                                                                                                                                                                                                                                                                                                                                                                                                                                                                                                                                                                                                                                                                                                                                                                                   | 73.01   | 22.13  | 3.30 | 6.77E-05 | 4.47E-04 |
| 1236 | 3 | F2-3 vs. L2-3 | 252482_at | AT3G46670 | Sugar isomerase (SIS) family protein;(source:Araport11)                                                                                                                                                                                                                                                                                                                                                                                                                                                                                                                                                                                                                                                                                                                                                                                                                                                                                                                                                                                                                                                                                                                                                                                                                                                                                             | 80.80   | 24.48  | 3.30 | 1.20E-06 | 2.80E-05 |
| 1237 | 3 | F2-3 vs. L2-3 | 251855_at | AT3G54690 |                                                                                                                                                                                                                                                                                                                                                                                                                                                                                                                                                                                                                                                                                                                                                                                                                                                                                                                                                                                                                                                                                                                                                                                                                                                                                                                                                     | 422.21  | 128.05 | 3.30 | 1.11E-04 | 6.34E-04 |

|      |   |               |                 |           |                                                                                                                                                                                                                                                                                                                                                                                                                                                                                                                                                                               |         |        |      |          |          |
|------|---|---------------|-----------------|-----------|-------------------------------------------------------------------------------------------------------------------------------------------------------------------------------------------------------------------------------------------------------------------------------------------------------------------------------------------------------------------------------------------------------------------------------------------------------------------------------------------------------------------------------------------------------------------------------|---------|--------|------|----------|----------|
| 1238 | 3 | F2-3 vs. L2-3 | 247440_at       | AT5G62680 | Encodes a high-affinity, proton-dependent glucosinolate-specific transporter that is crucial for the transport of both methionine- and tryptophan-derived glucosinolates to seeds.                                                                                                                                                                                                                                                                                                                                                                                            | 152.73  | 46.29  | 3.30 | 2.50E-06 | 4.58E-05 |
| 1239 | 3 | F2-3 vs. L2-3 | 260267_at       | AT1G68530 | Encodes KCS6, a member of the 3-ketoacyl-CoA synthase family involved in the biosynthesis of VLCFA (very long chain fatty acids).                                                                                                                                                                                                                                                                                                                                                                                                                                             | 124.33  | 37.94  | 3.28 | 2.26E-04 | 1.05E-03 |
| 1240 | 3 | F2-3 vs. L2-3 | 254001_at       | AT4G26260 | Encodes a myo-inositol oxygenase, which is the first enzyme in the inositol route to ascorbate (L&#8208;ascorbic acid, AsA, vitamin C). Overexpression results in enhanced biomass and abiotic stress tolerance.                                                                                                                                                                                                                                                                                                                                                              | 75.07   | 22.88  | 3.28 | 2.73E-05 | 2.34E-04 |
| 1241 | 3 | F2-3 vs. L2-3 | 262073_at       | AT1G59640 | A basic helix-loop-helix encoding gene (BIGPETAL, BPE) involved in the control of petal size. BPE is expressed via two mRNAs derived from an alternative splicing event. The BPEub (AT1G59640.1) transcript is expressed ubiquitously, whereas the BPEp (AT1G59640.2) transcript is preferentially expressed in petals. Plants that lack the petal-expressed variant BPEp have larger petals as a result of increased cell size. BPEp is positively regulated downstream of APETALA3, PISTILLATA, APETALA1 and PISTILLATA3 and is negatively regulated downstream of AGAMOUS. | 129.73  | 39.71  | 3.27 | 3.90E-06 | 6.01E-05 |
| 1242 | 3 | F2-3 vs. L2-3 | 249754_at       | AT5G24530 | Encodes a putative 2OG-Fe(II) oxygenase that is defense-associated but required for susceptibility to downy mildew. The mRNA is cell-to-cell mobile.                                                                                                                                                                                                                                                                                                                                                                                                                          | 128.50  | 39.31  | 3.27 | 6.90E-06 | 9.18E-05 |
| 1243 | 3 | F2-3 vs. L2-3 | 264016_at       | AT2G21220 | SAUR-like auxin-responsive protein family;(source:Araport11)                                                                                                                                                                                                                                                                                                                                                                                                                                                                                                                  | 39.45   | 12.09  | 3.26 | 2.00E-07 | 7.75E-06 |
| 1244 | 3 | F2-3 vs. L2-3 | 258976_at       | AT3G01980 | NAD(P)-binding Rossmann-fold superfamily protein;(source:Araport11)<br>Encodes one of four UDP-glucose dehydrogenase UGD) genes. Mutation of this gene in combination with UGD2 leads to swollen plant cell walls and severe developmental defects associated with changes in pectic polysaccharides.                                                                                                                                                                                                                                                                         | 348.78  | 106.90 | 3.26 | < 1e-07  | 4.57E-06 |
| 1245 | 3 | F2-3 vs. L2-3 | 246511_at       | AT5G15490 | Encodes GRX480, a member of the glutaredoxin family that regulates protein redox state. GRX480 interacts with TGA factors and suppresses JA-responsive PDF1.2 transcription. GRX480 transcription is SA-inducible and requires NPR1. Maybe involved in SA/JA cross-talk. It has also been shown to interact with the transcription factor TGA2 and suppress ORA59 promoter activity.                                                                                                                                                                                          | 355.18  | 108.93 | 3.26 | 4.69E-04 | 1.78E-03 |
| 1246 | 3 | F2-3 vs. L2-3 | 261443_at       | AT1G28480 | Encodes a member of the auxin response factor family. Mediates auxin response via expression of auxin regulated genes. Acts redundantly with ARF8 to control stamen elongation and flower maturation. Expression of ARF6 is controlled by miR167.                                                                                                                                                                                                                                                                                                                             | 65.56   | 20.19  | 3.25 | 9.20E-06 | 1.13E-04 |
| 1247 | 3 | F2-3 vs. L2-3 | 256311_at       | AT1G30330 | MYC-related protein with a basic helix-loop-helix motif at the C-terminus and a region similar to the maize B/R family at the N-terminus                                                                                                                                                                                                                                                                                                                                                                                                                                      | 1132.38 | 348.21 | 3.25 | 7.00E-07 | 1.83E-05 |
| 1248 | 3 | F2-3 vs. L2-3 | 255675_at       | AT4G00480 | NADH dehydrogenase ND1                                                                                                                                                                                                                                                                                                                                                                                                                                                                                                                                                        | 46.07   | 14.16  | 3.25 | 3.30E-06 | 5.45E-05 |
| 1249 | 3 | F2-3 vs. L2-3 | 244936_at       | ATCG01100 | Member of Alpha-Expansin Gene Family. Naming convention from the Expansin Working Group (Kende et al, Plant Mol Bio). Involved in the formation of nematode-induced syncytia in roots of Arabidopsis thaliana.                                                                                                                                                                                                                                                                                                                                                                | 214.84  | 66.14  | 3.25 | 6.48E-05 | 4.33E-04 |
| 1250 | 3 | F2-3 vs. L2-3 | 256299_at       | AT1G69530 | AFG1-like ATPase family protein;(source:Araport11)                                                                                                                                                                                                                                                                                                                                                                                                                                                                                                                            | 88.85   | 27.45  | 3.24 | 5.98E-05 | 4.12E-04 |
| 1251 | 3 | F2-3 vs. L2-3 | 265634_at       | AT2G25530 | Chloroplastic enzyme responsible for the synthesis of 16:3 and 18:3 fatty acids from galactolipids, sulpholipids and phosphatidylglycerol. Uses ferredoxin as electron donor. Gene expression is induced by wounding in shoot and root. The wound-response in shoot is independent of jasmonic acid mediated pathway whereas the root response is mediated by jasmonic acid. The mRNA is cell-to-cell mobile.                                                                                                                                                                 | 124.27  | 38.50  | 3.23 | 5.00E-07 | 1.44E-05 |
| 1252 | 3 | F2-3 vs. L2-3 | 256417_s_a<br>t | AT3G11170 | Encodes a cytosolic copper/zinc superoxide dismutase CSD1 that can detoxify superoxide radicals. Its expression is affected by miR398-directed mRNA cleavage. Regulated by biotic and abiotic stress. Activation of CSD1 in the cytoplasm involves both a CCS-dependent and -independent pathway.                                                                                                                                                                                                                                                                             | 320.70  | 99.25  | 3.23 | 1.06E-05 | 1.22E-04 |
| 1253 | 3 | F2-3 vs. L2-3 | 264809_at       | AT1G08830 | Encodes a SOS2-like protein kinase that is a member of the CBL-interacting protein kinase family.Loss of function mutants show a decrease in sensitivity to high pH.Phosphorylates AHA2, a plasma membrane H+ ATPase.This phosphorylation appears to regulate the activity of the proton transporter.                                                                                                                                                                                                                                                                         | 1279.68 | 397.53 | 3.22 | 6.27E-04 | 2.23E-03 |
| 1254 | 3 | F2-3 vs. L2-3 | 255872_at       | AT2G30360 | Encodes a cellulose synthase CESA5 that produces seed mucilage cellulose.Mutants are defective in seed coat mucilage.Involved in the regulation of mucilage composition and/or mucilage synthesis.                                                                                                                                                                                                                                                                                                                                                                            | 88.05   | 27.33  | 3.22 | 1.29E-04 | 7.05E-04 |
| 1255 | 3 | F2-3 vs. L2-3 | 250505_at       | AT5G09870 | D-mannose binding lectin protein with Apple-like carbohydrate-binding domain-containing protein;(source:Araport11)                                                                                                                                                                                                                                                                                                                                                                                                                                                            | 672.67  | 208.78 | 3.22 | 2.71E-05 | 2.33E-04 |
| 1256 | 3 | F2-3 vs. L2-3 | 264279_s_a<br>t | AT1G78820 |                                                                                                                                                                                                                                                                                                                                                                                                                                                                                                                                                                               | 100.53  | 31.27  | 3.21 | 1.60E-06 | 3.46E-05 |

|      |   |               |           |           |                                                                                                                                                                                                                                                                                                                                                                                                                                                                                                               |         |        |      |          |          |
|------|---|---------------|-----------|-----------|---------------------------------------------------------------------------------------------------------------------------------------------------------------------------------------------------------------------------------------------------------------------------------------------------------------------------------------------------------------------------------------------------------------------------------------------------------------------------------------------------------------|---------|--------|------|----------|----------|
| 1257 | 3 | F2-3 vs. L2-3 | 265998_at | AT2G24270 | Encodes a protein with non-phosphorylating NADP-dependent glyceraldehyde-3-phosphate dehydrogenase activity. The activity of the enzyme was determined from leaf extracts; the enzyme has not been purified to confirm activity.                                                                                                                                                                                                                                                                              | 647.36  | 201.44 | 3.21 | 3.66E-05 | 2.88E-04 |
| 1258 | 3 | F2-3 vs. L2-3 | 250690_at | AT5G06530 | Encodes ABCG22, an ABC transporter gene. Mutation results in increased water transpiration and drought susceptibility.                                                                                                                                                                                                                                                                                                                                                                                        | 77.32   | 24.11  | 3.21 | 1.40E-05 | 1.51E-04 |
| 1259 | 3 | F2-3 vs. L2-3 | 247450_at | AT5G62350 | Plant invertase/pectin methylesterase inhibitor superfamily protein;(source:Araport11)                                                                                                                                                                                                                                                                                                                                                                                                                        | 410.43  | 127.97 | 3.21 | 2.34E-05 | 2.10E-04 |
| 1260 | 3 | F2-3 vs. L2-3 | 255622_at | AT4G01070 | the glucosyltransferase (UGT72B1) is involved in metabolizing xenobiotica (chloroaniline and chlorophenole). Comparison between wild type and knock-out mutant demonstrates the central role of this gene for metabolizing chloroaniline but significantly less for chlorophenole. The glucosyltransferase preferred UDP-xylose over UDP-glucose indicating its (additional) functioning as a xylosyltransferase in planta                                                                                    | 75.69   | 23.66  | 3.20 | 1.88E-05 | 1.83E-04 |
| 1261 | 3 | F2-3 vs. L2-3 | 260745_at | AT1G78370 | Encodes glutathione transferase belonging to the tau class of GSTs. Naming convention according to Wagner et al. (2002).                                                                                                                                                                                                                                                                                                                                                                                      | 228.99  | 71.74  | 3.19 | 5.00E-07 | 1.44E-05 |
| 1262 | 3 | F2-3 vs. L2-3 | 245293_at | AT4G16660 | heat shock protein 70 (Hsp 70) family protein;(source:Araport11)                                                                                                                                                                                                                                                                                                                                                                                                                                              | 97.08   | 30.45  | 3.19 | 7.20E-06 | 9.51E-05 |
| 1263 | 3 | F2-3 vs. L2-3 | 265182_at | AT1G23740 | AOR is an alkenal/one oxidoreductase that acts on compounds with unsaturated alpha,beta-carbonyls. The activity of this enzyme with a number of substrates, including acrolein and 3-buten-2-one, was demonstrated in vitro using a truncated form of the protein that lacked approximately 80 of the first amino acids. This protein appears to localize to the chloroplast where it likely helps to maintain the photosynthetic process by detoxifying reactive carbonyls formed during lipid peroxidation. | 425.44  | 134.25 | 3.17 | 7.00E-07 | 1.83E-05 |
| 1264 | 3 | F2-3 vs. L2-3 | 264760_at | AT1G61290 | member of SYP12 Gene Family                                                                                                                                                                                                                                                                                                                                                                                                                                                                                   | 116.48  | 36.78  | 3.17 | 8.70E-06 | 1.08E-04 |
| 1265 | 3 | F2-3 vs. L2-3 | 245854_at | AT5G13490 | Encodes mitochondrial ADP/ATP carrier                                                                                                                                                                                                                                                                                                                                                                                                                                                                         | 1076.07 | 340.52 | 3.16 | 2.04E-05 | 1.92E-04 |
| 1266 | 3 | F2-3 vs. L2-3 | 261933_at | AT1G22410 | Class-II DAHP synthetase family protein;(source:Araport11)                                                                                                                                                                                                                                                                                                                                                                                                                                                    | 713.21  | 226.80 | 3.14 | 2.60E-06 | 4.67E-05 |
| 1267 | 3 | F2-3 vs. L2-3 | 253833_at | AT4G27790 | Calcium-binding EF hand family protein;(source:Araport11)                                                                                                                                                                                                                                                                                                                                                                                                                                                     | 71.59   | 22.81  | 3.14 | 2.27E-05 | 2.07E-04 |
| 1268 | 3 | F2-3 vs. L2-3 | 246488_at | AT5G16010 | 3-oxo-5-alpha-steroid 4-dehydrogenase family protein;(source:Araport11)                                                                                                                                                                                                                                                                                                                                                                                                                                       | 207.87  | 66.27  | 3.14 | 6.70E-06 | 8.98E-05 |
| 1269 | 3 | F2-3 vs. L2-3 | 258619_at | AT3G02780 | Encodes a protein with isopentenyl diphosphate:dimethylallyl diphosphate isomerase activity. There is genetic evidence that it functions in the mevalonate, but not the MEP biosynthetic pathway. Encodes a member of the Arabidopsis LIM proteins: a family of actin bundlers with distinct expression patterns. WLIM1, WLIM2a, and WLIM2b are widely expressed, whereas PLIM2a, PLIM2b, and PLIM2c are predominantly expressed in pollen. Regulates actin cytoskeleton organization.                        | 446.09  | 142.38 | 3.13 | 6.95E-05 | 4.53E-04 |
| 1270 | 3 | F2-3 vs. L2-3 | 251361_at | AT3G61230 | Membrane localized protein of unknown function. Involved in negative regulation of immune response. Mutants have increased resistance to pathogens.                                                                                                                                                                                                                                                                                                                                                           | 44.96   | 14.38  | 3.13 | 9.40E-06 | 1.14E-04 |
| 1271 | 3 | F2-3 vs. L2-3 | 261376_at | AT1G18660 |                                                                                                                                                                                                                                                                                                                                                                                                                                                                                                               | 127.50  | 40.80  | 3.12 | 8.32E-05 | 5.18E-04 |
| 1272 | 3 | F2-3 vs. L2-3 | 252213_at | AT3G50210 | 2-oxoglutarate (2OG) and Fe(II)-dependent oxygenase superfamily protein;(source:Araport11)                                                                                                                                                                                                                                                                                                                                                                                                                    | 313.00  | 100.24 | 3.12 | 6.20E-06 | 8.57E-05 |
| 1273 | 3 | F2-3 vs. L2-3 | 267095_at | AT2G38280 | Encodes a protein with in vitro AMP deaminase activity that is involved in embryogenesis. Homozygous mutant embryos fail to develop past the zygote stage. Encodes a protein predicted to function in tandem with PDX2 to form glutamine amidotransferase                                                                                                                                                                                                                                                     | 384.41  | 123.71 | 3.11 | 6.23E-05 | 4.24E-04 |
| 1274 | 3 | F2-3 vs. L2-3 | 251091_at | AT5G01410 | complex with involved in vitamin B6 biosynthesis.                                                                                                                                                                                                                                                                                                                                                                                                                                                             | 678.21  | 218.19 | 3.11 | 3.40E-06 | 5.58E-05 |
| 1275 | 3 | F2-3 vs. L2-3 | 248263_at | AT5G53370 | pectin methylesterase PCR fragment F;(source:Araport11)                                                                                                                                                                                                                                                                                                                                                                                                                                                       | 96.65   | 31.05  | 3.11 | 4.30E-06 | 6.44E-05 |
| 1276 | 3 | F2-3 vs. L2-3 | 245001_at | ATCG00220 | PSII low MW protein                                                                                                                                                                                                                                                                                                                                                                                                                                                                                           | 2612.77 | 839.23 | 3.11 | 6.91E-04 | 2.40E-03 |
| 1277 | 3 | F2-3 vs. L2-3 | 246036_at | AT5G08370 | Member of Glycoside Hydrolase Family 27 (GH27)that functions as an &#945;-galactosidase.                                                                                                                                                                                                                                                                                                                                                                                                                      | 47.27   | 15.25  | 3.10 | 2.50E-06 | 4.58E-05 |
| 1278 | 3 | F2-3 vs. L2-3 | 261218_at | AT1G20020 | Encodes a leaf-type ferredoxin:NADP(H) oxidoreductase. It is present in both chloroplast stroma and thylakoid membranes but is more abundant in the stroma The mRNA is cell-to-cell mobile.                                                                                                                                                                                                                                                                                                                   | 230.64  | 74.66  | 3.09 | 1.10E-04 | 6.29E-04 |
| 1279 | 3 | F2-3 vs. L2-3 | 251433_at | AT3G59830 | Integrin-linked protein kinase family;(source:Araport11)                                                                                                                                                                                                                                                                                                                                                                                                                                                      | 53.30   | 17.22  | 3.09 | 4.50E-06 | 6.65E-05 |
| 1280 | 3 | F2-3 vs. L2-3 | 253276_at | AT4G34050 | Methyltransferase in the lignin biosynthetic pathway.                                                                                                                                                                                                                                                                                                                                                                                                                                                         | 1049.65 | 339.37 | 3.09 | 6.20E-06 | 8.57E-05 |
| 1281 | 3 | F2-3 vs. L2-3 | 262801_at | AT1G21010 | poly polymerase;(source:Araport11)                                                                                                                                                                                                                                                                                                                                                                                                                                                                            | 62.40   | 20.28  | 3.08 | 5.09E-05 | 3.66E-04 |
| 1282 | 3 | F2-3 vs. L2-3 | 251598_at | AT3G57600 | encodes a member of the DREB subfamily A-2 of ERF/AP2 transcription factor family. The protein contains one AP2 domain. There are eight members in this subfamily including DREB2A AND DREB2B that are involved in response to drought.                                                                                                                                                                                                                                                                       | 49.63   | 16.11  | 3.08 | 7.00E-07 | 1.83E-05 |

|      |   |               |           |           |                                                                                                                                                                                                                                                                                                                                                                                                                                                                                                                                                                                                                             |         |        |      |          |          |
|------|---|---------------|-----------|-----------|-----------------------------------------------------------------------------------------------------------------------------------------------------------------------------------------------------------------------------------------------------------------------------------------------------------------------------------------------------------------------------------------------------------------------------------------------------------------------------------------------------------------------------------------------------------------------------------------------------------------------------|---------|--------|------|----------|----------|
| 1283 | 3 | F2-3 vs. L2-3 | 250547_at | AT5G08100 | Encodes an asparaginase that catalyzes the degradation of L-asparagine to L-aspartic acid and ammonia.                                                                                                                                                                                                                                                                                                                                                                                                                                                                                                                      | 135.73  | 44.08  | 3.08 | 2.00E-06 | 3.93E-05 |
| 1284 | 3 | F2-3 vs. L2-3 | 257217_at | AT3G14940 | Encodes a cytosolic phosphoenolpyruvate carboxylase (PEPC) that has activity when expressed in E.coli. Its mRNA is most abundantly expressed in roots and siliques. PPC3 belongs to the plant-type PEPC family. It can form an enzymatically active complex with a castor bean ortholog of PPC4, which encodes a bacterial-type PEPC. The mRNA is cell-to-cell mobile.                                                                                                                                                                                                                                                      | 64.30   | 20.97  | 3.07 | 7.40E-06 | 9.65E-05 |
| 1285 | 3 | F2-3 vs. L2-3 | 246460_at | AT5G16910 | encodes a gene similar to cellulose synthase. Located in Golgi membranes. The mRNA is cell-to-cell mobile.                                                                                                                                                                                                                                                                                                                                                                                                                                                                                                                  | 479.52  | 156.24 | 3.07 | 3.45E-04 | 1.43E-03 |
| 1286 | 3 | F2-3 vs. L2-3 | 249710_at | AT5G35630 | chloroplastic glutamine synthetase The mRNA is cell-to-cell mobile.                                                                                                                                                                                                                                                                                                                                                                                                                                                                                                                                                         | 1035.03 | 337.32 | 3.07 | 4.17E-05 | 3.20E-04 |
| 1287 | 3 | F2-3 vs. L2-3 | 247251_at | AT5G64740 | Encodes a cellulose synthase isomer. CESA6 mutants have cellulose defect in the primary cell wall. Multiple lines of evidence suggest that CESA6, along with CESA1 and CESA3 are present in the same plasma membrane complex for cellulose biosynthesis. CESA2 and CESA5 are related to CESA6, having partially redundant roles. As inferred from the null role of secondary wall-type CesAs, included in a set of five primary wall-type CesAs that may support trichome cell wall thickening. The mRNA is cell-to-cell mobile.                                                                                            | 518.82  | 169.16 | 3.07 | 2.40E-06 | 4.54E-05 |
| 1288 | 3 | F2-3 vs. L2-3 | 249688_at | AT5G36160 | Encodes a cytosolic L-tyrosine aminotransferase. AtTAT2 exhibits much broader amino donor specificity than AtTAT1 and can use not only Tyr but also Phe, Trp, His, Met, Leu, Ala, Ser, Cys, Asp, Asn, Gln, and Arg as amino donors.                                                                                                                                                                                                                                                                                                                                                                                         | 61.15   | 20.00  | 3.06 | 3.70E-04 | 1.50E-03 |
| 1289 | 3 | F2-3 vs. L2-3 | 259277_at | AT3G01180 | starch synthase 2;(source:Araport11)                                                                                                                                                                                                                                                                                                                                                                                                                                                                                                                                                                                        | 516.77  | 169.35 | 3.05 | 9.86E-05 | 5.81E-04 |
| 1290 | 3 | F2-3 vs. L2-3 | 252052_at | AT3G52600 | cell wall invertase 2;(source:Araport11)                                                                                                                                                                                                                                                                                                                                                                                                                                                                                                                                                                                    | 81.51   | 26.73  | 3.05 | 4.75E-05 | 3.49E-04 |
| 1291 | 3 | F2-3 vs. L2-3 | 252011_at | AT3G52720 | Encodes an alpha carbonic anhydrase (CAH1) located in the chloroplast stroma. Most chloroplast proteins are encoded by the nuclear genome and imported with the help of sorting signals that are intrinsic parts of the polypeptides. CAH1 takes an alternative route through the secretory pathway, and becomes N-glycosylated before entering the chloroplast. Glycosylation and intra-molecular disulfide bridge formation are necessary for the correct folding, ER export, trafficking and activity of the protein.                                                                                                    | 79.69   | 26.13  | 3.05 | 1.08E-05 | 1.24E-04 |
| 1292 | 3 | F2-3 vs. L2-3 | 265559_at | AT2G05530 | Glycine-rich protein family;(source:Araport11)                                                                                                                                                                                                                                                                                                                                                                                                                                                                                                                                                                              | 154.54  | 50.81  | 3.04 | 4.38E-04 | 1.70E-03 |
| 1293 | 3 | F2-3 vs. L2-3 | 245159_at | AT2G33100 | encodes a gene similar to cellulose synthase                                                                                                                                                                                                                                                                                                                                                                                                                                                                                                                                                                                | 78.84   | 25.93  | 3.04 | 1.52E-05 | 1.59E-04 |
| 1294 | 3 | F2-3 vs. L2-3 | 251109_at | AT5G01600 | Encodes a ferretin protein that is targeted to the chloroplast. Member of a Ferritin gene family. Gene expression is induced in response to iron overload and by nitric oxide. Expression of the gene is downregulated in the presence of paraquat, an inducer of photooxidative stress.                                                                                                                                                                                                                                                                                                                                    | 133.47  | 43.93  | 3.04 | 2.60E-04 | 1.16E-03 |
| 1295 | 3 | F2-3 vs. L2-3 | 263950_at | AT2G36020 | HVA22-like protein J;(source:Araport11)                                                                                                                                                                                                                                                                                                                                                                                                                                                                                                                                                                                     | 100.90  | 33.25  | 3.03 | 4.90E-06 | 7.16E-05 |
| 1296 | 3 | F2-3 vs. L2-3 | 252363_at | AT3G48460 | GDLS-motif esterase/acyltransferase/lipase. Enzyme group with broad substrate specificity that may catalyze acyltransfer or hydrolase reactions with lipid and non-lipid substrates.                                                                                                                                                                                                                                                                                                                                                                                                                                        | 56.00   | 18.48  | 3.03 | 1.66E-05 | 1.70E-04 |
| 1297 | 3 | F2-3 vs. L2-3 | 256891_at | AT3G19030 | transcription initiation factor TFIID subunit 1b-like protein;(source:Araport11)                                                                                                                                                                                                                                                                                                                                                                                                                                                                                                                                            | 143.03  | 47.41  | 3.02 | 6.46E-05 | 4.33E-04 |
| 1298 | 3 | F2-3 vs. L2-3 | 248758_at | AT5G47620 | RNA-binding (RRM/RBD/RNP motifs) family protein;(source:Araport11)                                                                                                                                                                                                                                                                                                                                                                                                                                                                                                                                                          | 415.50  | 137.77 | 3.02 | 5.01E-05 | 3.63E-04 |
| 1299 | 3 | F2-3 vs. L2-3 | 253891_at | AT4G27720 | Major facilitator superfamily protein;(source:Araport11)                                                                                                                                                                                                                                                                                                                                                                                                                                                                                                                                                                    | 368.56  | 122.28 | 3.01 | 8.00E-07 | 2.05E-05 |
| 1300 | 3 | F2-3 vs. L2-3 | 248382_at | AT5G51890 | encodes peroxidase involved in the lignification of tracheary elements (TE) in roots                                                                                                                                                                                                                                                                                                                                                                                                                                                                                                                                        | 61.80   | 20.70  | 2.99 | 4.20E-05 | 3.21E-04 |
| 1301 | 3 | F2-3 vs. L2-3 | 248129_at | AT5G54780 | Ypt/Rab-GAP domain of gyp1p superfamily protein;(source:Araport11)                                                                                                                                                                                                                                                                                                                                                                                                                                                                                                                                                          | 286.45  | 95.69  | 2.99 | 7.74E-05 | 4.89E-04 |
| 1302 | 3 | F2-3 vs. L2-3 | 264348_at | AT1G12110 | Encodes NRT1.1 (CHL1), a dual-affinity nitrate transporter. The protein is expressed in guard cells and function in stomatal opening. Mutants have less transpiration and are more tolerant to drought. Expressed in lateral roots. Involved in nitrate signaling which enables the plant root system to detect and exploit nitrate-rich soil patches. Comparing to the wild type, the mutant displays a strongly decreased lateral root proliferation phenotype in nitrate rich patches on growth medium. Affects flowering time via interaction with the FLC dependent flowering pathway to influence its target gene FT. | 102.53  | 34.40  | 2.98 | 7.20E-06 | 9.51E-05 |
| 1303 | 3 | F2-3 vs. L2-3 | 262988_at | AT1G23310 | Identified by cloning the gene that corresponded to a purified protein having glyoxylate aminotransferase activity. Localized to the peroxisome and thought to be involved in photorespiration/ metabolic salvage pathway.                                                                                                                                                                                                                                                                                                                                                                                                  | 343.21  | 115.16 | 2.98 | 2.50E-06 | 4.58E-05 |
| 1304 | 3 | F2-3 vs. L2-3 | 248243_at | AT5G53590 | SAUR-like auxin-responsive protein family;(source:Araport11)                                                                                                                                                                                                                                                                                                                                                                                                                                                                                                                                                                | 59.27   | 19.89  | 2.98 | 1.62E-05 | 1.67E-04 |
| 1305 | 3 | F2-3 vs. L2-3 | 260944_at | AT1G45130 | beta-galactosidase 5;(source:Araport11)                                                                                                                                                                                                                                                                                                                                                                                                                                                                                                                                                                                     | 249.05  | 84.26  | 2.96 | 1.46E-04 | 7.65E-04 |

|      |   |               |           |           |                                                                                                                                                                                                                                                                                                                                                                                                                                                                                                                                                                  |         |         |      |          |          |
|------|---|---------------|-----------|-----------|------------------------------------------------------------------------------------------------------------------------------------------------------------------------------------------------------------------------------------------------------------------------------------------------------------------------------------------------------------------------------------------------------------------------------------------------------------------------------------------------------------------------------------------------------------------|---------|---------|------|----------|----------|
| 1306 | 3 | F2-3 vs. L2-3 | 267612_at | AT2G26690 | Major facilitator superfamily protein;(source:Araport11)                                                                                                                                                                                                                                                                                                                                                                                                                                                                                                         | 58.60   | 19.78   | 2.96 | 2.70E-06 | 4.78E-05 |
| 1307 | 3 | F2-3 vs. L2-3 | 258614_at | AT3G02770 | Ribonuclease E inhibitor RraA/Dimethylmenaquinone methyltransferase;(source:Araport11)                                                                                                                                                                                                                                                                                                                                                                                                                                                                           | 146.33  | 49.62   | 2.95 | 3.64E-05 | 2.88E-04 |
| 1308 | 3 | F2-3 vs. L2-3 | 251157_at | AT3G63140 | Encodes a protein with ribonuclease activity that is involved in plastid rRNA maturation.                                                                                                                                                                                                                                                                                                                                                                                                                                                                        | 106.06  | 36.00   | 2.95 | 1.06E-05 | 1.22E-04 |
| 1309 | 3 | F2-3 vs. L2-3 | 260985_at | AT1G53500 | encodes a putative NDP-L-rhamnose synthase, an enzyme required for the synthesis of the pectin rhamnogalacturonan I, the major component of Arabidopsis mucilage. Gene is involved in seed coat mucilage cell development. Mutant analyses suggest that MUM4 is required for complete mucilage synthesis, cytoplasmic rearrangement and seed coat development.                                                                                                                                                                                                   | 225.48  | 76.70   | 2.94 | 1.18E-04 | 6.63E-04 |
| 1310 | 3 | F2-3 vs. L2-3 | 252998_at | AT4G38510 | One of three genes encoding the vacuolar ATP synthase subunit B1. The protein binds to and co-localizes with F-actin, bundles F-actin to form higher-order structure, and stabilizes actin filaments in vitro.                                                                                                                                                                                                                                                                                                                                                   | 213.87  | 72.71   | 2.94 | 1.37E-04 | 7.31E-04 |
| 1311 | 3 | F2-3 vs. L2-3 | 249327_at | AT5G40890 | Encodes a member of the voltage-dependent chloride channel. Also functions as a NO3-/H+ exchanger that serves to accumulate nitrate nutrient in vacuoles. Mutants homozygous for the T-DNA insertion mutation have reduced nitrate uptake capacity in high nitrate environment and exhibit hypersensitivity to chlorate.                                                                                                                                                                                                                                         | 105.82  | 36.02   | 2.94 | 1.56E-04 | 8.04E-04 |
| 1312 | 3 | F2-3 vs. L2-3 | 262473_at | AT1G50250 | encodes an FTSH protease that is localized to the chloroplast. Involved in the D1 repair cycle of Photosystem II. FtsH1 and FtsH5 are interchangeable in thylakoid membranes.                                                                                                                                                                                                                                                                                                                                                                                    | 357.02  | 121.98  | 2.93 | 3.44E-05 | 2.75E-04 |
| 1313 | 3 | F2-3 vs. L2-3 | 258750_at | AT3G05910 | Pectinacetylesterase family protein;(source:Araport11)                                                                                                                                                                                                                                                                                                                                                                                                                                                                                                           | 159.41  | 54.35   | 2.93 | 1.84E-04 | 8.97E-04 |
| 1314 | 3 | F2-3 vs. L2-3 | 249126_at | AT5G43380 | encodes a type I serine/threonine protein phosphatase expressed in roots, rosettes and flowers.                                                                                                                                                                                                                                                                                                                                                                                                                                                                  | 89.23   | 30.45   | 2.93 | 3.21E-04 | 1.35E-03 |
| 1315 | 3 | F2-3 vs. L2-3 | 260014_at | AT1G68010 | Encodes hydroxypyruvate reductase.                                                                                                                                                                                                                                                                                                                                                                                                                                                                                                                               | 400.00  | 137.17  | 2.92 | 6.10E-06 | 8.52E-05 |
| 1316 | 3 | F2-3 vs. L2-3 | 266790_at | AT2G28950 | Encodes an expansin. Naming convention from the Expansin Working Group (Kende et al, 2004. Plant Mol Bio). Involved in the formation of nematode-induced syncytia in roots of Arabidopsis thaliana.                                                                                                                                                                                                                                                                                                                                                              | 349.33  | 119.79  | 2.92 | 5.54E-05 | 3.91E-04 |
| 1317 | 3 | F2-3 vs. L2-3 | 266097_at | AT2G37970 | SOUL heme-binding family protein;(source:Araport11)                                                                                                                                                                                                                                                                                                                                                                                                                                                                                                              | 175.23  | 60.02   | 2.92 | 6.36E-05 | 4.30E-04 |
| 1318 | 3 | F2-3 vs. L2-3 | 267035_at | AT2G38400 | alanine:glyoxylate aminotransferase 2 homolog (AGT3) mRNA, One of three isoforms of the iron-sulfur component of the succinate dehydrogenase complex, a component of the mitochondrial respiratory chain complex II. The product of the nuclear encoded gene is imported into the mitochondrion. Expressed during germination and post-germinative growth.                                                                                                                                                                                                       | 398.92  | 136.78  | 2.92 | 4.42E-04 | 1.71E-03 |
| 1319 | 3 | F2-3 vs. L2-3 | 249343_at | AT5G40650 | Encodes a member of the TBL (TRICHOME BIFURCATION-LIKE) gene family containing a plant-specific DUF231 (domain of unknown function) domain. A putative xyloglucan O-acetyltransferase. TBL gene family has 46 members, two of which (TBR/AT5G06700 and TBL3/AT5G01360) have been shown to be involved in the synthesis and deposition of secondary wall cellulose, presumably by influencing the esterification state of pectic polymers. A nomenclature for this gene family has been proposed (Volker Bischoff & Wolf Scheible, 2010, personal communication). | 1251.26 | 428.06  | 2.92 | 1.60E-06 | 3.46E-05 |
| 1320 | 3 | F2-3 vs. L2-3 | 257309_at | AT3G28150 | senescence-associated family protein, putative (DUF581);(source:Araport11)                                                                                                                                                                                                                                                                                                                                                                                                                                                                                       | 36.98   | 12.70   | 2.91 | 1.20E-06 | 2.80E-05 |
| 1321 | 3 | F2-3 vs. L2-3 | 245993_at | AT5G20700 | Encodes a protein with similarity to squalene monooxygenases.                                                                                                                                                                                                                                                                                                                                                                                                                                                                                                    | 475.25  | 163.21  | 2.91 | < 1e-07  | 4.57E-06 |
| 1322 | 3 | F2-3 vs. L2-3 | 249773_at | AT5G24140 | Secretory carrier membrane protein (SCAMP) family protein;(source:Araport11)                                                                                                                                                                                                                                                                                                                                                                                                                                                                                     | 35.39   | 12.15   | 2.91 | 1.56E-05 | 1.62E-04 |
| 1323 | 3 | F2-3 vs. L2-3 | 265419_at | AT2G20840 | Encodes a high affinity vacuolar calcium antiporter. The residue His 338 is critical to Ca2+ transport activity. Disruption of CAX1 reduces manganese and zinc of shoot tissue and results in a decrease in the activity of vacuolar V-type proton ATPase.                                                                                                                                                                                                                                                                                                       | 580.36  | 199.87  | 2.90 | 4.41E-05 | 3.32E-04 |
| 1324 | 3 | F2-3 vs. L2-3 | 267093_at | AT2G38170 | basic helix-loop-helix (bHLH) DNA-binding superfamily protein;(source:Araport11)                                                                                                                                                                                                                                                                                                                                                                                                                                                                                 | 143.29  | 49.47   | 2.90 | 1.10E-06 | 2.61E-05 |
| 1325 | 3 | F2-3 vs. L2-3 | 264264_at | AT1G09250 | Chitinase family protein;(source:Araport11)                                                                                                                                                                                                                                                                                                                                                                                                                                                                                                                      | 117.36  | 40.66   | 2.89 | 6.70E-06 | 8.98E-05 |
| 1326 | 3 | F2-3 vs. L2-3 | 260560_at | AT2G43590 | One of the three genes encoding subunit A of the trimeric enzyme ATP Citrate lyase                                                                                                                                                                                                                                                                                                                                                                                                                                                                               | 38.26   | 13.24   | 2.89 | 8.00E-06 | 1.03E-04 |
| 1327 | 3 | F2-3 vs. L2-3 | 264916_at | AT1G60810 | EXS (ERD1/XPR1/SYG1) family protein;(source:Araport11)                                                                                                                                                                                                                                                                                                                                                                                                                                                                                                           | 2606.23 | 905.68  | 2.88 | 3.06E-04 | 1.31E-03 |
| 1328 | 3 | F2-3 vs. L2-3 | 266732_at | AT2G03240 |                                                                                                                                                                                                                                                                                                                                                                                                                                                                                                                                                                  | 130.47  | 45.32   | 2.88 | 2.70E-06 | 4.78E-05 |
| 1329 | 3 | F2-3 vs. L2-3 | 258298_at | AT3G23300 | S-adenosyl-L-methionine-dependent methyltransferases superfamily protein;(source:Araport11)                                                                                                                                                                                                                                                                                                                                                                                                                                                                      | 43.70   | 15.19   | 2.88 | 1.06E-04 | 6.14E-04 |
| 1330 | 3 | F2-3 vs. L2-3 | 255435_at | AT4G03280 | Encodes the Rieske FeS center of cytochrome b6f complex. Gene is expressed in shoot but not in root. Mutant has reduced electron transport at saturating light intensities and Q-cycle activity is hypersensitive to acidification of the thylakoid lumen. The mRNA is cell-to-cell mobile.                                                                                                                                                                                                                                                                      | 2971.62 | 1032.30 | 2.88 | 1.64E-05 | 1.69E-04 |

|      |   |               |           |           |                                                                                                                                                                                                                                                                                                                                                                                                                                                                                                    |         |        |      |          |          |
|------|---|---------------|-----------|-----------|----------------------------------------------------------------------------------------------------------------------------------------------------------------------------------------------------------------------------------------------------------------------------------------------------------------------------------------------------------------------------------------------------------------------------------------------------------------------------------------------------|---------|--------|------|----------|----------|
| 1331 | 3 | F2-3 vs. L2-3 | 255011_at | AT4G10040 | Encodes cytochrome c. Promoter directs preferential expression in vascular tissues of cotyledons, leaves, roots, and hypocotyls, and in anthers. Double mutants with CYTC-1 accumulate starch during the day, have delayed growth and development and reduced GA and DELLA proteins linking cellular metabolism and GA homeostasis.                                                                                                                                                                | 204.87  | 71.22  | 2.88 | 4.72E-05 | 3.48E-04 |
| 1332 | 3 | F2-3 vs. L2-3 | 250533_at | AT5G08640 | Encodes a flavonol synthase that catalyzes formation of flavonols from dihydroflavonols. Co-expressed with CHI and CHS (qRT-PCR).                                                                                                                                                                                                                                                                                                                                                                  | 59.24   | 20.55  | 2.88 | 8.60E-05 | 5.29E-04 |
| 1333 | 3 | F2-3 vs. L2-3 | 262264_at | AT1G42470 | Patched family protein;(source:Araport11)                                                                                                                                                                                                                                                                                                                                                                                                                                                          | 353.89  | 123.82 | 2.86 | 2.27E-05 | 2.07E-04 |
| 1334 | 3 | F2-3 vs. L2-3 | 263419_at | AT2G17220 | Encodes a putative serine/threonine-specific protein kinase kin3. Protein is N-myristoylated.                                                                                                                                                                                                                                                                                                                                                                                                      | 89.81   | 31.45  | 2.86 | 1.81E-05 | 1.80E-04 |
| 1335 | 3 | F2-3 vs. L2-3 | 251711_at | AT3G56960 | Encodes a protein with phosphatidylinositol-4-phosphate 5-kinase activity that plays a role in pollen tip growth. The enzyme localizes to the apical plasma membrane and adjacent cytosolic region of pollen tubes. Overexpression of this gene leads to increased deposition of pectin in the cell wall at the tip of the pollen tube and causes altered pollen tube morphology.                                                                                                                  | 44.64   | 15.60  | 2.86 | 2.71E-05 | 2.33E-04 |
| 1336 | 3 | F2-3 vs. L2-3 | 256015_at | AT1G19150 | PSI type II chlorophyll a/b-binding protein (Lhca2*1) mRNA, The mRNA is cell-to-cell mobile.                                                                                                                                                                                                                                                                                                                                                                                                       | 242.13  | 84.90  | 2.85 | 3.50E-06 | 5.69E-05 |
| 1337 | 3 | F2-3 vs. L2-3 | 257392_at | AT2G24450 | Fasciclin-like arabinogalactan protein. Possibly involved in embryogenesis and seed development.                                                                                                                                                                                                                                                                                                                                                                                                   | 123.54  | 43.29  | 2.85 | 2.04E-04 | 9.72E-04 |
| 1338 | 3 | F2-3 vs. L2-3 | 245057_at | AT2G26490 | JGB contains seven WD40 repeats and is highly conserved in flowering plants. Overexpression inhibits pollen germination. suggesting JGB is a negative regulator of pollen germination                                                                                                                                                                                                                                                                                                              | 75.03   | 26.29  | 2.85 | 5.20E-06 | 7.50E-05 |
| 1339 | 3 | F2-3 vs. L2-3 | 266363_at | AT2G41250 | Haloacid dehalogenase-like hydrolase (HAD) superfamily protein;(source:Araport11)                                                                                                                                                                                                                                                                                                                                                                                                                  | 45.33   | 15.90  | 2.85 | 2.60E-06 | 4.67E-05 |
| 1340 | 3 | F2-3 vs. L2-3 | 250034_at | AT5G18280 | Encodes an enzyme with ATPase and ADPase activity (an apyrase) that when mutated in combination with ATAPY1 causes a complete inhibition of pollen germination. Encodes a Type One Protein Phosphatase that acts as a nucleocytoplasmic negative regulator of tip growth. Mutants affect pollen germination, pollen tube growth, and root hair growth. It acts genetically downstream of ANX1 (AT3G04690) and ANX2 (AT5G28680) and is functionally redundant with TOPP8 (AT5G27840).               | 133.99  | 46.98  | 2.85 | 4.00E-07 | 1.25E-05 |
| 1341 | 3 | F2-3 vs. L2-3 | 259109_at | AT3G05580 | GRIP/coiled-coil protein, putative (DUF1664);(source:Araport11)                                                                                                                                                                                                                                                                                                                                                                                                                                    | 748.15  | 263.48 | 2.84 | 2.56E-05 | 2.24E-04 |
| 1342 | 3 | F2-3 vs. L2-3 | 264984_at | AT1G27000 |                                                                                                                                                                                                                                                                                                                                                                                                                                                                                                    | 278.10  | 98.27  | 2.83 | 1.21E-04 | 6.71E-04 |
| 1343 | 3 | F2-3 vs. L2-3 | 259839_at | AT1G52190 | Encodes a low affinity nitrate transporter that is expressed in the plasma membrane and found in the phloem of the major veins of leaves. It is responsible for nitrate redistribution to young leaves.                                                                                                                                                                                                                                                                                            | 889.79  | 314.19 | 2.83 | 1.86E-05 | 1.83E-04 |
| 1344 | 3 | F2-3 vs. L2-3 | 264956_at | AT1G76990 | ACT domain repeat 3;(source:Araport11)                                                                                                                                                                                                                                                                                                                                                                                                                                                             | 309.99  | 109.43 | 2.83 | 1.94E-04 | 9.32E-04 |
| 1345 | 3 | F2-3 vs. L2-3 | 245431_at | AT4G17080 | Histone H3 K4-specific methyltransferase SET7/9 family protein;(source:Araport11)                                                                                                                                                                                                                                                                                                                                                                                                                  | 77.18   | 27.39  | 2.82 | 5.40E-06 | 7.72E-05 |
| 1346 | 3 | F2-3 vs. L2-3 | 249090_at | AT5G43745 | ion channel POLLUX-like protein, putative (DUF1012);(source:Araport11)                                                                                                                                                                                                                                                                                                                                                                                                                             | 51.97   | 18.41  | 2.82 | 7.27E-04 | 2.49E-03 |
| 1347 | 3 | F2-3 vs. L2-3 | 248267_at | AT5G53460 | NADH-dependent glutamate synthase The mRNA is cell-to-cell mobile.                                                                                                                                                                                                                                                                                                                                                                                                                                 | 117.75  | 41.69  | 2.82 | 2.07E-04 | 9.85E-04 |
| 1348 | 3 | F2-3 vs. L2-3 | 266165_at | AT2G28190 | Encodes a chloroplastic copper/zinc superoxide dismutase CSD2 that can detoxify superoxide radicals. Its expression is affected by miR398-directed mRNA cleavage. Activation depends totally on CCS. Overexpression of a miR398-resistant form of CSD2 leads to more dramatic improvements in stress (high light, Cu2+ and methyl viologen) tolerance than overexpression of wild-type CSD2.                                                                                                       | 1009.84 | 358.88 | 2.81 | 2.72E-04 | 1.20E-03 |
| 1349 | 3 | F2-3 vs. L2-3 | 267425_at | AT2G34810 | The mRNA is cell-to-cell mobile. FAD-binding Berberine family protein;(source:Araport11)                                                                                                                                                                                                                                                                                                                                                                                                           | 81.34   | 28.91  | 2.81 | 9.18E-05 | 5.55E-04 |
| 1350 | 3 | F2-3 vs. L2-3 | 254848_at | AT4G11960 | Encodes PGRL1B, a transmembrane protein present in thylakoids. PGRL1B has a highly homologous isoform PGRL1A encoded by At4g22890. Plants lacking PGRL1 show perturbation of cyclic electron flow, similar to PGR5-deficient plants. PGRL1 and PGR5 interact physically and associate with PSI (photosystem I).                                                                                                                                                                                    | 91.43   | 32.52  | 2.81 | 3.30E-06 | 5.45E-05 |
| 1351 | 3 | F2-3 vs. L2-3 | 260421_at | AT1G69640 | Encodes one of the two redundant sphingoid base hydroxylases (SBH). Involved in sphingolipid trihydroxy long-chain base (4-hydroxysphinganine) biosynthesis. Double mutants of SBHs were dwarfed and not able to progress from vegetative to reproductive growth. ASA1 encodes the alpha subunit of anthranilate synthase, which catalyzes the rate-limiting step of tryptophan synthesis. ASA1 is induced by ethylene, and forms a link between ethylene signalling and auxin synthesis in roots. | 67.95   | 24.26  | 2.80 | 8.64E-05 | 5.29E-04 |
| 1352 | 3 | F2-3 vs. L2-3 | 250738_at | AT5G05730 |                                                                                                                                                                                                                                                                                                                                                                                                                                                                                                    | 542.49  | 193.73 | 2.80 | 2.97E-04 | 1.28E-03 |
| 1353 | 3 | F2-3 vs. L2-3 | 251668_at | AT3G57010 | Calcium-dependent phosphotriesterase superfamily protein;(source:Araport11)                                                                                                                                                                                                                                                                                                                                                                                                                        | 272.02  | 97.88  | 2.78 | 3.48E-04 | 1.44E-03 |

|      |   |               |            |           |                                                                                                                                                                                                                                                                                                                                                                                                                                                  |         |        |      |          |          |
|------|---|---------------|------------|-----------|--------------------------------------------------------------------------------------------------------------------------------------------------------------------------------------------------------------------------------------------------------------------------------------------------------------------------------------------------------------------------------------------------------------------------------------------------|---------|--------|------|----------|----------|
| 1354 | 3 | F2-3 vs. L2-3 | 255645_at  | AT4G00880 | SAUR-like auxin-responsive protein family;(source:Araport11)<br>Encodes a subunit of ATPase complex CF0, which is a proton channel that supplies the proton motive force to drive ATP synthesis by CF1 portion of the complex.                                                                                                                                                                                                                   | 47.61   | 17.15  | 2.78 | 1.34E-04 | 7.21E-04 |
| 1355 | 3 | F2-3 vs. L2-3 | 244995_at  | ATCG00150 |                                                                                                                                                                                                                                                                                                                                                                                                                                                  | 199.50  | 71.71  | 2.78 | 1.10E-05 | 1.26E-04 |
| 1356 | 3 | F2-3 vs. L2-3 | 254809_at  | AT4G12410 | SAUR-like auxin-responsive protein family;(source:Araport11)                                                                                                                                                                                                                                                                                                                                                                                     | 122.02  | 43.97  | 2.77 | 6.58E-05 | 4.38E-04 |
| 1357 | 3 | F2-3 vs. L2-3 | 261149_s_a | AT1G19550 | Glutathione S-transferase family protein;(source:Araport11)                                                                                                                                                                                                                                                                                                                                                                                      | 2243.08 | 813.15 | 2.76 | 4.10E-06 | 6.26E-05 |
| 1358 | 3 | F2-3 vs. L2-3 | 264301_at  | AT1G78780 | pathogenesis-related family protein;(source:Araport11)                                                                                                                                                                                                                                                                                                                                                                                           | 259.80  | 94.00  | 2.76 | 3.78E-04 | 1.52E-03 |
| 1359 | 3 | F2-3 vs. L2-3 | 258359_s_a |           | Encodes a glycolate oxidase that modulates reactive oxygen species-mediated signal transduction during nonhost resistance. The mRNA is cell-to-cell mobile.                                                                                                                                                                                                                                                                                      |         |        |      |          |          |
|      |   |               | t          | AT3G14420 |                                                                                                                                                                                                                                                                                                                                                                                                                                                  | 106.44  | 38.62  | 2.76 | 6.85E-05 | 4.49E-04 |
| 1360 | 3 | F2-3 vs. L2-3 | 256835_at  | AT3G22890 | encodes ATP sulfurylase, the first enzyme in the sulfate assimilation pathway of Arabidopsis. It may also participate in selenium metabolism. The mRNA is cell-to-cell mobile.                                                                                                                                                                                                                                                                   | 1303.87 | 471.99 | 2.76 | 2.00E-06 | 3.93E-05 |
|      |   |               |            |           | Member of actin subclass composed of ACT12 and ACT4. RNA is expressed at very low levels in vegetative organs, low levels in flowers and very high levels in pollen. Expression of an ACT12/GUS fusion was found in vascular tissues, tapetum, developing and mature pollen, the root cap and in a ring of pericycle tissues during lateral root initiation and early development.                                                               |         |        |      |          |          |
| 1361 | 3 | F2-3 vs. L2-3 | 252531_at  | AT3G46520 |                                                                                                                                                                                                                                                                                                                                                                                                                                                  | 39.90   | 14.48  | 2.76 | 1.33E-05 | 1.47E-04 |
| 1362 | 3 | F2-3 vs. L2-3 | 247994_at  | AT5G56140 | RNA-binding KH domain-containing protein;(source:Araport11)                                                                                                                                                                                                                                                                                                                                                                                      | 50.69   | 18.35  | 2.76 | 4.70E-06 | 6.91E-05 |
| 1363 | 3 | F2-3 vs. L2-3 | 247038_at  | AT5G67160 | Encodes a member of the BAHD acyltransferase superfamily. Mutants have enhanced susceptibility to virulent and avirulent pathogens and are defective in pathogen induced SA biosynthesis. EPS1 may act upstream of SA biosynthesis as application of SA can rescue the mutant phenotype.                                                                                                                                                         | 312.21  | 113.15 | 2.76 | 1.89E-05 | 1.84E-04 |
| 1364 | 3 | F2-3 vs. L2-3 | 267101_at  | AT2G41480 | Encodes a cationic cell-wall-bound peroxidase homolog that is involved in the lignification of cell walls. Regulated by COG1, involved in seed longevity.                                                                                                                                                                                                                                                                                        | 63.03   | 22.91  | 2.75 | 1.78E-05 | 1.78E-04 |
|      |   |               |            |           | Encodes a protein with glutamyl-tRNA reductase (GluTR) activity, catalyzing the NADPH-dependent reduction of Glu-tRNA(Glu) to glutamate 1-semialdehyde (GSA) with the release of free tRNA(Glu).                                                                                                                                                                                                                                                 |         |        |      |          |          |
| 1365 | 3 | F2-3 vs. L2-3 | 256020_at  | AT1G58290 | It is involved in the early steps of chlorophyll biosynthesis.                                                                                                                                                                                                                                                                                                                                                                                   | 198.58  | 72.58  | 2.74 | 3.00E-06 | 5.09E-05 |
| 1366 | 3 | F2-3 vs. L2-3 | 265929_s_a | AT2G18570 | UDP-Glycosyltransferase superfamily protein;(source:Araport11)                                                                                                                                                                                                                                                                                                                                                                                   | 286.91  | 104.65 | 2.74 | 5.07E-05 | 3.65E-04 |
| 1367 | 3 | F2-3 vs. L2-3 | 266607_at  | AT2G46300 | Late embryogenesis abundant (LEA) hydroxyproline-rich glycoprotein family;(source:Araport11)                                                                                                                                                                                                                                                                                                                                                     | 53.18   | 19.42  | 2.74 | 1.96E-04 | 9.42E-04 |
| 1368 | 3 | F2-3 vs. L2-3 | 247402_at  | AT5G62750 | hypothetical protein;(source:Araport11)                                                                                                                                                                                                                                                                                                                                                                                                          | 24.92   | 9.09   | 2.74 | 2.97E-04 | 1.28E-03 |
| 1369 | 3 | F2-3 vs. L2-3 | 244986_at  | ATCG00820 | Encodes a 6.8-kDa protein of the small ribosomal subunit.                                                                                                                                                                                                                                                                                                                                                                                        | 532.78  | 194.27 | 2.74 | 2.05E-05 | 1.92E-04 |
| 1370 | 3 | F2-3 vs. L2-3 | 264787_at  | AT2G17840 | Identified as drought-inducible gene by differential hybridization. Upregulated by high light, drought, cold and salt stress determined by microarray analysis.                                                                                                                                                                                                                                                                                  | 533.79  | 197.13 | 2.71 | 2.72E-05 | 2.33E-04 |
| 1371 | 3 | F2-3 vs. L2-3 | 256433_at  | AT3G10985 | A senescence-associated gene whose expression is induced in response to treatment with Nep1, a fungal protein that causes necrosis. The mRNA is cell-to-cell mobile.                                                                                                                                                                                                                                                                             | 64.18   | 23.68  | 2.71 | 1.17E-05 | 1.31E-04 |
| 1372 | 3 | F2-3 vs. L2-3 | 257066_at  | AT3G18280 | Bifunctional inhibitor/lipid-transfer protein/seed storage 2S albumin superfamily protein;(source:Araport11)                                                                                                                                                                                                                                                                                                                                     | 55.80   | 20.57  | 2.71 | 7.27E-04 | 2.49E-03 |
|      |   |               |            |           | The gene encodes a 4-coumarate coenzyme A ligase being able to use sinapate as substrate. The catalytic efficiency was in the following (descending) order: p-coumaric acid, caffeic acid, 5-OH-ferulic acid, ferulic acid and sinapic acid. At4CL5 was unable to use cinnamic acid as substrate. Knockout of At4CL5 (4cl5) revealed no effect on syringyl lignin content indicating that the activity observed does probably not occur in vivo. |         |        |      |          |          |
| 1373 | 3 | F2-3 vs. L2-3 | 258037_at  | AT3G21230 |                                                                                                                                                                                                                                                                                                                                                                                                                                                  | 83.50   | 30.83  | 2.71 | 8.00E-05 | 5.02E-04 |
| 1374 | 3 | F2-3 vs. L2-3 | 246431_at  | AT5G17480 | pollen calcium-binding protein 1;(source:Araport11)                                                                                                                                                                                                                                                                                                                                                                                              | 25.68   | 9.49   | 2.71 | < 1e-07  | 4.57E-06 |
| 1375 | 3 | F2-3 vs. L2-3 | 248193_at  | AT5G54080 | Encodes a homogentisate 1,2-dioxygenase that can convert homogentisate to malylacetoacetate and is likely to be involved in tyrosine catabolism.                                                                                                                                                                                                                                                                                                 | 251.60  | 92.98  | 2.71 | 3.50E-04 | 1.44E-03 |
|      |   |               |            |           | ALD1 is a L-lysine alpha-aminotransferase. It is part of the pipercolic acid biosynthetic pathway, where it catalyzes the biochemical conversion of lysine to epsilon-amino-alpha-ketocaproic acid (KAC) which is subject to subsequent transamination, cyclization and isomerization to form 2,3-dehydropipercolic acid.                                                                                                                        |         |        |      |          |          |
| 1376 | 3 | F2-3 vs. L2-3 | 265658_at  | AT2G13810 |                                                                                                                                                                                                                                                                                                                                                                                                                                                  | 43.54   | 16.13  | 2.70 | 2.50E-06 | 4.58E-05 |
| 1377 | 3 | F2-3 vs. L2-3 | 259598_at  | AT1G27980 | dihydrosphingosine phosphate lyase;(source:Araport11)                                                                                                                                                                                                                                                                                                                                                                                            | 125.68  | 46.71  | 2.69 | 4.50E-06 | 6.65E-05 |
| 1378 | 3 | F2-3 vs. L2-3 | 258398_at  | AT3G15360 | encodes a prokaryotic thioredoxin The mRNA is cell-to-cell mobile.                                                                                                                                                                                                                                                                                                                                                                               | 66.20   | 24.65  | 2.69 | 1.81E-04 | 8.86E-04 |



|      |   |               |           |           |                                                                                                                                                                                                                                                                                                                                                                                                                                                                                                                                                                                                                                                                                                                                                                                                                                                                                                                                                                                                                                             |         |        |      |          |          |
|------|---|---------------|-----------|-----------|---------------------------------------------------------------------------------------------------------------------------------------------------------------------------------------------------------------------------------------------------------------------------------------------------------------------------------------------------------------------------------------------------------------------------------------------------------------------------------------------------------------------------------------------------------------------------------------------------------------------------------------------------------------------------------------------------------------------------------------------------------------------------------------------------------------------------------------------------------------------------------------------------------------------------------------------------------------------------------------------------------------------------------------------|---------|--------|------|----------|----------|
| 1379 | 3 | F2-3 vs. L2-3 | 261285_at | AT1G35720 | Encodes a member of the annexin gene family, a diverse, multigene family of calcium-dependent, membrane-binding proteins. The protein was determined to have peroxidase activity. This activity is thought to be dependent on the presence of post-translational modifications (most likely phosphorylation). The protein was shown to be present as a mixture of monomer and homodimer. The homodimerization seems to be dependent on the presence of Ca <sup>2+</sup> or H <sub>2</sub> O <sub>2</sub> . The dimerization was prevented by the addition of DTT, &#946;-mercaptoethanol and TCEP. Annat1 mRNA is expressed in flowers, roots,leaves and stems and is most abundant in stems. mRNA levels are increased in response to oxidative stress. Developmental expression patterns suggest a role in Golgi-mediated polysaccharide secretion. It is a Ca <sup>2+</sup> -permeable transporter providing a molecular link between reactive oxygen species and cytosolic Ca <sup>2+</sup> in plants. The mRNA is cell-to-cell mobile. | 52.55   | 19.64  | 2.68 | 2.34E-04 | 1.07E-03 |
| 1380 | 3 | F2-3 vs. L2-3 | 245213_at | AT1G44575 | Encoding PSII-S (CP22), a ubiquitous pigment-binding protein associated with photosystem II (PSII) of higher plants. Involved in nonphotochemical quenching rather than in photosynthesis. Mutant has a normal violaxanthin cycle but has a limited capacity of quenching singlet excited chlorophylls and is tolerant to lipid peroxidation.                                                                                                                                                                                                                                                                                                                                                                                                                                                                                                                                                                                                                                                                                               | 1591.51 | 594.30 | 2.68 | 1.87E-05 | 1.83E-04 |
| 1381 | 3 | F2-3 vs. L2-3 | 257522_at | AT3G08990 | Yippee family putative zinc-binding protein;(source:Araport11)                                                                                                                                                                                                                                                                                                                                                                                                                                                                                                                                                                                                                                                                                                                                                                                                                                                                                                                                                                              | 53.26   | 19.84  | 2.68 | 1.10E-06 | 2.61E-05 |
| 1382 | 3 | F2-3 vs. L2-3 | 249638_at | AT5G36880 | Encodes a plastidic acetyl-coA synthetase. This enzyme plays a role in converting acetate to acetyl-coA in the plastids. It does not appear to be a major contributor to fatty acid biosynthesis based on mutant phenotypes. The enzyme seems to act as a monomer and may play an important role in preventing the toxic accumulation of fermentation products including acetaldehyde, acetate, and ethanol. It participates in the pyruvate dehydrogenase bypass pathway                                                                                                                                                                                                                                                                                                                                                                                                                                                                                                                                                                   | 1063.18 | 396.39 | 2.68 | 4.95E-04 | 1.86E-03 |
| 1383 | 3 | F2-3 vs. L2-3 | 266070_at | AT2G18660 | Encodes PNP-A (Plant Natriuretic Peptide A). PNPs are a class of systemically mobile molecules distantly related to expansins; their biological role has remained elusive. PNP-A contains a signal peptide domain and is secreted into the extracellular space. Co-expression analyses using microarray data suggest that PNP-A may function as a component of plant defence response and SAR in particular, and could be classified as a newly identified PR protein. It is stress responsive and can enhance its own expression.                                                                                                                                                                                                                                                                                                                                                                                                                                                                                                          | 78.29   | 29.32  | 2.67 | 4.35E-05 | 3.29E-04 |
| 1384 | 3 | F2-3 vs. L2-3 | 264317_at | AT1G70310 | Spermidine synthase.                                                                                                                                                                                                                                                                                                                                                                                                                                                                                                                                                                                                                                                                                                                                                                                                                                                                                                                                                                                                                        | 76.34   | 28.75  | 2.66 | 9.00E-07 | 2.22E-05 |
| 1385 | 3 | F2-3 vs. L2-3 | 258063_at | AT3G14620 | putative cytochrome P450 The mRNA is cell-to-cell mobile. Encodes a specialized sigma factor that functions in regulation of plastid genes and is responsible for the light-dependent transcription at the psbD LRP. Activation of SIG5 is dependent upon blue light and mediated by cryptochromes.                                                                                                                                                                                                                                                                                                                                                                                                                                                                                                                                                                                                                                                                                                                                         | 51.23   | 19.26  | 2.66 | 6.10E-06 | 8.52E-05 |
| 1386 | 3 | F2-3 vs. L2-3 | 249769_at | AT5G24120 | carboxyl-terminal proteinase-like protein (DUF239);(source:Araport11)                                                                                                                                                                                                                                                                                                                                                                                                                                                                                                                                                                                                                                                                                                                                                                                                                                                                                                                                                                       | 66.25   | 24.93  | 2.66 | 5.50E-05 | 3.89E-04 |
| 1387 | 3 | F2-3 vs. L2-3 | 248880_at | AT5G46200 |                                                                                                                                                                                                                                                                                                                                                                                                                                                                                                                                                                                                                                                                                                                                                                                                                                                                                                                                                                                                                                             | 82.89   | 31.16  | 2.66 | 2.93E-05 | 2.46E-04 |
| 1388 | 3 | F2-3 vs. L2-3 | 248163_at | AT5G54510 | Encodes an IAA-amido synthase that conjugates Ala, Asp, Phe, and Trp to auxin. Lines overexpressing this gene accumulate IAA-ASP and are hypersensitive to several auxins. Identified as a dominant mutation that displays shorter hypocotyls in light grown plants when compared to wild type siblings. Protein is similar to auxin inducible gene from pea (GH3). Encodes the ATPase alpha subunit, which is a subunit of ATP synthase and part of the CF1 portion which catalyzes the conversion of ADP to ATP using the proton motive force. This complex is located in the thylakoid membrane of the chloroplast.                                                                                                                                                                                                                                                                                                                                                                                                                      | 110.91  | 41.68  | 2.66 | 9.00E-06 | 1.11E-04 |
| 1389 | 3 | F2-3 vs. L2-3 | 245024_at | ATCG00120 |                                                                                                                                                                                                                                                                                                                                                                                                                                                                                                                                                                                                                                                                                                                                                                                                                                                                                                                                                                                                                                             | 1986.55 | 747.42 | 2.66 | 3.60E-06 | 5.76E-05 |
| 1390 | 3 | F2-3 vs. L2-3 | 256057_at | AT1G07180 | Internal NAD(P)H dehydrogenase in mitochondria. The predicted protein sequence has high homology with other designated NAD(P)H DHs from microorganisms; the capacity for matrix NAD(P)H oxidation via the rotenone-insensitive pathway is significantly reduced in the Atndi1 mutant plant line; the in vitro translation product of AtNDI1 is imported into isolated mitochondria and located on the inside of the inner membrane.                                                                                                                                                                                                                                                                                                                                                                                                                                                                                                                                                                                                         | 37.32   | 14.08  | 2.65 | 3.80E-06 | 5.94E-05 |
| 1391 | 3 | F2-3 vs. L2-3 | 265184_at | AT1G23710 | hypothetical protein (DUF1645);(source:Araport11)                                                                                                                                                                                                                                                                                                                                                                                                                                                                                                                                                                                                                                                                                                                                                                                                                                                                                                                                                                                           | 47.52   | 17.93  | 2.65 | 1.50E-06 | 3.34E-05 |
| 1392 | 3 | F2-3 vs. L2-3 | 261506_at | AT1G71697 | Encodes choline kinase. mRNA levels are increased in response to wounding. The mRNA is cell-to-cell mobile.                                                                                                                                                                                                                                                                                                                                                                                                                                                                                                                                                                                                                                                                                                                                                                                                                                                                                                                                 | 59.95   | 22.84  | 2.62 | 1.40E-06 | 3.16E-05 |
| 1393 | 3 | F2-3 vs. L2-3 | 259096_at | AT3G04840 | Ribosomal protein S3Ae;(source:Araport11)                                                                                                                                                                                                                                                                                                                                                                                                                                                                                                                                                                                                                                                                                                                                                                                                                                                                                                                                                                                                   | 628.55  | 240.32 | 2.62 | 1.09E-04 | 6.27E-04 |
| 1394 | 3 | F2-3 vs. L2-3 | 260656_at | AT1G19380 | sugar, putative (DUF1195);(source:Araport11)                                                                                                                                                                                                                                                                                                                                                                                                                                                                                                                                                                                                                                                                                                                                                                                                                                                                                                                                                                                                | 51.32   | 19.65  | 2.61 | 3.72E-04 | 1.51E-03 |
| 1395 | 3 | F2-3 vs. L2-3 | 262428_at | AT1G47570 | RING/U-box superfamily protein;(source:Araport11)                                                                                                                                                                                                                                                                                                                                                                                                                                                                                                                                                                                                                                                                                                                                                                                                                                                                                                                                                                                           | 181.54  | 69.57  | 2.61 | 1.79E-04 | 8.84E-04 |

|      |   |               |           |           |                                                                                                                                                                                                                                                                                                                                                                                                                                                                                                                        |         |        |      |          |          |
|------|---|---------------|-----------|-----------|------------------------------------------------------------------------------------------------------------------------------------------------------------------------------------------------------------------------------------------------------------------------------------------------------------------------------------------------------------------------------------------------------------------------------------------------------------------------------------------------------------------------|---------|--------|------|----------|----------|
| 1396 | 3 | F2-3 vs. L2-3 | 259896_at | AT1G71500 | Encodes PSB33, a protein conserved in the plastid lineage. PSB33 is associated with the chloroplast thylakoid membrane and provides stability to Photosystem II. The mRNA is cell-to-cell mobile.                                                                                                                                                                                                                                                                                                                      | 70.55   | 27.07  | 2.61 | 1.42E-05 | 1.53E-04 |
| 1397 | 3 | F2-3 vs. L2-3 | 253428_at | AT4G32410 | Encodes a cellulose synthase isomer. CESA1 mutants have cellulose defect in the primary cell wall. Multiple lines of evidence suggest that CESA1, along with CESA3 and CESA6 are present in the same plasma membrane complex for cellulose biosynthesis. lasma membrane complex for cellulose biosynthesis. As inferred from the null role of secondary wall-type CesAs, included in a set of five primary wall-type CesAs that may support trichome cell wall thickening.                                             | 269.45  | 103.19 | 2.61 | 1.70E-05 | 1.73E-04 |
| 1398 | 3 | F2-3 vs. L2-3 | 250204_at | AT5G13990 | A member of EXO70 gene family, putative exocyst subunits, conserved in land plants. Arabidopsis thaliana contains 23 putative EXO70 genes, which can be classified into eight clusters on the phylogenetic tree. This particular member is expressed in pollen and is involved in pollen tube elongation. Found in the cytoplasm and surprisingly, not found in the plasma membrane and is not found to colocalize with or interact with core exocyst subunits.                                                        | 45.04   | 17.24  | 2.61 | 8.83E-05 | 5.37E-04 |
| 1399 | 3 | F2-3 vs. L2-3 | 248467_at | AT5G50800 | Encodes a member of the SWEET sucrose efflux transporter family proteins, together with RPG1, it is involved in pollen development. Together with SWEET14, it is likely involved in modulating the GA response and is required for proper development of anthers, seeds and seedlings.                                                                                                                                                                                                                                 | 69.34   | 26.53  | 2.61 | 7.65E-05 | 4.85E-04 |
| 1400 | 3 | F2-3 vs. L2-3 | 257816_at | AT3G25140 | Quasimodo1, encodes a glycosyltransferase, involved in homogalacturonan biosynthesis; mutant shows cell adhesion defect and lower wall uronic acid content. The mRNA is cell-to-cell mobile.                                                                                                                                                                                                                                                                                                                           | 435.53  | 168.01 | 2.59 | 2.60E-06 | 4.67E-05 |
| 1401 | 3 | F2-3 vs. L2-3 | 252368_at | AT3G48520 | CYP94B3 is a jasmonoyl-isoleucine-12-hydroxylase that catalyzes the formation of 12-OH-JA-Ile from JA-Ile. By reducing the levels of this the biologically active phytohormone, CYP94B3 attenuates the jasmonic acid signaling cascade. CYP94B3 transcript levels rise in response to wounding.                                                                                                                                                                                                                        | 90.13   | 34.86  | 2.59 | 2.18E-04 | 1.02E-03 |
| 1402 | 3 | F2-3 vs. L2-3 | 251309_at | AT3G61220 | CytADR/SDR1 is an aldehyde reductase that catalyzes the reduction of the aldehyde carbonyl groups on alpha,beta-unsaturated aldehydes with more than 5 carbons in vitro. It can also act on menthone and neomenthol in vitro, but these do not represent likely endogenous activities of this enzyme in planta. GFP-tagged CytADR appears to localize to the cytosol where it likely plays a role in detoxifying reactive carbonyls. sdr1 mutants have altered responses to pathogens.The mRNA is cell-to-cell mobile. | 53.83   | 20.78  | 2.59 | 2.10E-06 | 4.08E-05 |
| 1403 | 3 | F2-3 vs. L2-3 | 247013_at | AT5G67480 | BTB and TAZ domain protein. Located in cytoplasm and expressed in fruit, flower and leaves.                                                                                                                                                                                                                                                                                                                                                                                                                            | 55.48   | 21.43  | 2.59 | 2.91E-05 | 2.45E-04 |
| 1404 | 3 | F2-3 vs. L2-3 | 252024_at | AT3G52880 | Encodes a peroxisomal monodehydroascorbate reductase, involved in the ascorbate-glutathione cycle which removes toxic H2O2                                                                                                                                                                                                                                                                                                                                                                                             | 1411.56 | 546.46 | 2.58 | 2.25E-05 | 2.06E-04 |
| 1405 | 3 | F2-3 vs. L2-3 | 262751_at | AT1G16310 | Cation efflux family protein which affects ABA-JA crosstalk and susceptibility to Mamestra brassicae herbivory.                                                                                                                                                                                                                                                                                                                                                                                                        | 42.66   | 16.63  | 2.57 | 2.47E-05 | 2.17E-04 |
| 1406 | 3 | F2-3 vs. L2-3 | 266716_at | AT2G46820 | Encodes the P subunit of Photosystem I. About 25% of the TMP14 pool appeared to be phosphorylated, and this ratio is not affected by light. Contains seven phosphorylation sites on threonine residue and chloroplast targeting signal. Located in the proximity of PSI-L, -H and -O subunits. Forms oligomers with other members of CURT1 family to modulate grana structure.                                                                                                                                         | 444.56  | 172.97 | 2.57 | 6.04E-05 | 4.15E-04 |
| 1407 | 3 | F2-3 vs. L2-3 | 255690_at | AT4G00360 | Encodes a member of the CYP86A subfamily of cytochrome p450 genes. Expressed at moderate levels in flowers, leaves, roots and stems.                                                                                                                                                                                                                                                                                                                                                                                   | 39.07   | 15.17  | 2.57 | 1.33E-05 | 1.47E-04 |
| 1408 | 3 | F2-3 vs. L2-3 | 254559_at | AT4G19200 | proline-rich family protein;(source:Araport11)                                                                                                                                                                                                                                                                                                                                                                                                                                                                         | 123.30  | 47.98  | 2.57 | 3.70E-06 | 5.84E-05 |
| 1409 | 3 | F2-3 vs. L2-3 | 264372_at | AT1G11840 | Encodes Ni+ dependent glyoxalase I homolog ATGLX1.                                                                                                                                                                                                                                                                                                                                                                                                                                                                     | 1990.64 | 778.32 | 2.56 | 2.83E-05 | 2.41E-04 |
| 1410 | 3 | F2-3 vs. L2-3 | 258875_at | AT3G03160 | B-cell receptor-associated-like protein;(source:Araport11)                                                                                                                                                                                                                                                                                                                                                                                                                                                             | 603.96  | 235.92 | 2.56 | 3.13E-05 | 2.58E-04 |
| 1411 | 3 | F2-3 vs. L2-3 | 249481_at | AT5G38900 | Thioredoxin superfamily protein;(source:Araport11)                                                                                                                                                                                                                                                                                                                                                                                                                                                                     | 38.57   | 15.07  | 2.56 | 8.30E-04 | 2.77E-03 |
| 1412 | 3 | F2-3 vs. L2-3 | 263166_at | AT1G03050 | Phosphatidylinositol binding clathrin assembly protein 5A/B are recent paralogs with overlapping functions in recycling ANXUR proteins to the pollen tube membrane.                                                                                                                                                                                                                                                                                                                                                    | 51.36   | 20.16  | 2.55 | 8.40E-06 | 1.05E-04 |
| 1413 | 3 | F2-3 vs. L2-3 | 266613_at | AT2G14900 | Gibberellin-regulated family protein;(source:Araport11)                                                                                                                                                                                                                                                                                                                                                                                                                                                                | 902.14  | 353.55 | 2.55 | 4.60E-05 | 3.42E-04 |
| 1414 | 3 | F2-3 vs. L2-3 | 266592_at | AT2G46210 | Fatty acid/sphingolipid desaturase;(source:Araport11)                                                                                                                                                                                                                                                                                                                                                                                                                                                                  | 275.26  | 108.08 | 2.55 | 8.10E-04 | 2.72E-03 |
| 1415 | 3 | F2-3 vs. L2-3 | 248822_at | AT5G47000 | Peroxidase superfamily protein;(source:Araport11)                                                                                                                                                                                                                                                                                                                                                                                                                                                                      | 33.63   | 13.21  | 2.55 | 6.30E-06 | 8.66E-05 |
| 1416 | 3 | F2-3 vs. L2-3 | 258188_at | AT3G17800 | mRNA level of the MEB5.2 gene (At3g17800) remains unchanged after cutting the inflorescence stem                                                                                                                                                                                                                                                                                                                                                                                                                       | 241.60  | 94.94  | 2.54 | 7.00E-07 | 1.83E-05 |

|                                                                                                                                                                                                                                                                                                                                                                                                                                                                                                                 |   |               |                 |           |                                                                                                     |         |         |      |          |          |
|-----------------------------------------------------------------------------------------------------------------------------------------------------------------------------------------------------------------------------------------------------------------------------------------------------------------------------------------------------------------------------------------------------------------------------------------------------------------------------------------------------------------|---|---------------|-----------------|-----------|-----------------------------------------------------------------------------------------------------|---------|---------|------|----------|----------|
| 1417                                                                                                                                                                                                                                                                                                                                                                                                                                                                                                            | 3 | F2-3 vs. L2-3 | 246490_at       | AT5G15950 | Adenosylmethionine decarboxylase family protein;(source:Araport11)                                  | 140.19  | 55.22   | 2.54 | 2.24E-04 | 1.04E-03 |
| 1418                                                                                                                                                                                                                                                                                                                                                                                                                                                                                                            | 3 | F2-3 vs. L2-3 | 247627_at       | AT5G60360 | Encodes a senescence-associated thiol protease. The mRNA is cell-to-cell mobile.                    | 971.22  | 382.18  | 2.54 | 3.89E-04 | 1.56E-03 |
| 1419                                                                                                                                                                                                                                                                                                                                                                                                                                                                                                            | 3 | F2-3 vs. L2-3 | 246995_at       | AT5G67470 | formin homolog 6;(source:Araport11)                                                                 | 36.79   | 14.50   | 2.54 | 1.76E-05 | 1.77E-04 |
| 1420                                                                                                                                                                                                                                                                                                                                                                                                                                                                                                            | 3 | F2-3 vs. L2-3 | 263734_at       | AT1G60030 | nucleobase-ascorbate transporter 7;(source:Araport11)                                               | 92.49   | 36.58   | 2.53 | 2.00E-05 | 1.90E-04 |
| 1421                                                                                                                                                                                                                                                                                                                                                                                                                                                                                                            | 3 | F2-3 vs. L2-3 | 252366_at       | AT3G48420 | Haloacid dehalogenase-like hydrolase (HAD) superfamily protein;(source:Araport11)                   | 341.18  | 134.67  | 2.53 | 1.78E-04 | 8.82E-04 |
| 1422                                                                                                                                                                                                                                                                                                                                                                                                                                                                                                            | 3 | F2-3 vs. L2-3 | 263108_at       | AT1G65240 | Eukaryotic aspartyl protease family protein;(source:Araport11)                                      | 55.47   | 22.05   | 2.52 | 9.06E-05 | 5.49E-04 |
| 1423                                                                                                                                                                                                                                                                                                                                                                                                                                                                                                            | 3 | F2-3 vs. L2-3 | 265306_at       | AT2G20320 | DENN (AEX-3) domain-containing protein;(source:Araport11)                                           | 56.34   | 22.40   | 2.52 | 9.58E-05 | 5.69E-04 |
| Encodes catalytic subunit of serine/threonine protein phosphatase 2A. It can associate with phytochromes A and B in vitro. Mutant plants display an accelerated flowering phenotype.Acts antagonistically to SnRK2 to regulate ABI5 phosphorylation. It inteacts with NRP which results in tethering to endosomes leading to its degradation.                                                                                                                                                                   |   |               |                 |           |                                                                                                     | 162.81  | 64.57   | 2.52 | 3.11E-04 | 1.33E-03 |
| 1424                                                                                                                                                                                                                                                                                                                                                                                                                                                                                                            | 3 | F2-3 vs. L2-3 | 256629_at       | AT3G19980 |                                                                                                     |         |         |      |          |          |
| 1425                                                                                                                                                                                                                                                                                                                                                                                                                                                                                                            | 3 | F2-3 vs. L2-3 | 258321_at       | AT3G22840 | Encodes an early light-inducible protein.                                                           | 586.85  | 232.93  | 2.52 | 3.60E-06 | 5.76E-05 |
| Encodes a protein disulfide isomerase-like (PDIL) protein, a member of a multigene family within the thioredoxin (TRX) superfamily. Transcript levels for this gene are up-regulated in response to three different chemical inducers of ER stress (dithiothreitol, beta-mercaptoethanol, and tunicamycin).                                                                                                                                                                                                     |   |               |                 |           |                                                                                                     | 643.16  | 255.06  | 2.52 | 8.81E-04 | 2.91E-03 |
| 1426                                                                                                                                                                                                                                                                                                                                                                                                                                                                                                            | 3 | F2-3 vs. L2-3 | 251840_at       | AT3G54960 | Neither AtIRE1-2 nor AtbZIP60 appear to be required for this response.                              | 426.00  | 169.85  | 2.51 | 1.48E-04 | 7.71E-04 |
| 1427                                                                                                                                                                                                                                                                                                                                                                                                                                                                                                            | 3 | F2-3 vs. L2-3 | 262885_at       | AT1G64740 | alpha-tubulin expressed primarily in stamens and mature pollen                                      | 60.86   | 24.25   | 2.51 | 2.94E-05 | 2.46E-04 |
| 1428                                                                                                                                                                                                                                                                                                                                                                                                                                                                                                            | 3 | F2-3 vs. L2-3 | 266979_at       | AT2G39470 | PsbP-like protein 2;(source:Araport11)                                                              |         |         |      |          |          |
| encodes a protein similar to UDP-glucuronic acid decarboxylase. UDP-glucuronic acid decarboxylase produces UDP-xylose, which is a substrate for many cell wall carbohydrates including hemicellulose and pectin. UDP-xylose is also known to feedback regulate several cell wall biosynthetic enzymes.                                                                                                                                                                                                          |   |               |                 |           |                                                                                                     | 1058.50 | 422.50  | 2.51 | 3.99E-04 | 1.59E-03 |
| 1429                                                                                                                                                                                                                                                                                                                                                                                                                                                                                                            | 3 | F2-3 vs. L2-3 | 251234_s_a<br>t | AT2G47650 |                                                                                                     |         |         |      |          |          |
| 1430                                                                                                                                                                                                                                                                                                                                                                                                                                                                                                            | 3 | F2-3 vs. L2-3 | 252058_at       | AT3G52470 | Late embryogenesis abundant (LEA) hydroxyproline-rich glycoprotein family;(source:Araport11)        | 328.25  | 130.76  | 2.51 | 2.03E-04 | 9.66E-04 |
| Encodes an aromatic alcohol:NADP+ oxidoreductase whose mRNA levels are increased in response to treatment with a variety of phytopathogenic bacteria. Though similar to mannitol dehydrogenases, this enzyme does not have mannitol dehydrogenase activity.                                                                                                                                                                                                                                                     |   |               |                 |           |                                                                                                     | 83.70   | 33.30   | 2.51 | 5.80E-05 | 4.03E-04 |
| 1431                                                                                                                                                                                                                                                                                                                                                                                                                                                                                                            | 3 | F2-3 vs. L2-3 | 252984_at       | AT4G37990 |                                                                                                     | 87.33   | 34.75   | 2.51 | 2.00E-07 | 7.75E-06 |
| 1432                                                                                                                                                                                                                                                                                                                                                                                                                                                                                                            | 3 | F2-3 vs. L2-3 | 251020_at       | AT5G02270 | member of NAP subfamily                                                                             | 584.91  | 233.79  | 2.50 | 1.78E-05 | 1.78E-04 |
| 1433                                                                                                                                                                                                                                                                                                                                                                                                                                                                                                            | 3 | F2-3 vs. L2-3 | 262262_at       | AT1G70780 | hypothetical protein;(source:Araport11)                                                             |         |         |      |          |          |
| 1434                                                                                                                                                                                                                                                                                                                                                                                                                                                                                                            | 3 | F2-3 vs. L2-3 | 248534_at       | AT5G50030 | Plant invertase/pectin methylesterase inhibitor superfamily protein;(source:Araport11)              | 34.98   | 14.02   | 2.50 | 4.53E-04 | 1.74E-03 |
| 1435                                                                                                                                                                                                                                                                                                                                                                                                                                                                                                            | 3 | F2-3 vs. L2-3 | 254573_at       | AT4G19420 | Pectinacetylerase family protein;(source:Araport11)                                                 | 147.41  | 59.26   | 2.49 | 1.95E-04 | 9.39E-04 |
| 1436                                                                                                                                                                                                                                                                                                                                                                                                                                                                                                            | 3 | F2-3 vs. L2-3 | 250366_at       | AT5G11420 | Encodes a DUF642 cell wall protein.                                                                 | 111.42  | 44.80   | 2.49 | 2.60E-06 | 4.67E-05 |
| 1437                                                                                                                                                                                                                                                                                                                                                                                                                                                                                                            | 3 | F2-3 vs. L2-3 | 262357_at       | AT1G73040 | Mannose-binding lectin superfamily protein;(source:Araport11)                                       | 71.98   | 29.00   | 2.48 | 8.64E-05 | 5.29E-04 |
| 1438                                                                                                                                                                                                                                                                                                                                                                                                                                                                                                            | 3 | F2-3 vs. L2-3 | 265338_at       | AT2G18400 | ribosomal protein L6 family protein;(source:Araport11)                                              | 1900.34 | 765.93  | 2.48 | 1.20E-06 | 2.80E-05 |
| 1439                                                                                                                                                                                                                                                                                                                                                                                                                                                                                                            | 3 | F2-3 vs. L2-3 | 267367_at       | AT2G44210 | carboxyl-terminal peptidase (DUF239);(source:Araport11)                                             | 247.64  | 99.92   | 2.48 | 7.22E-04 | 2.48E-03 |
| Encodes a protein with sinapic acid:UDP-glucose glucosyltransferase activity. Mutants defective in this gene are hyper-fluorescent (which accumulate in their trichomes a compound that is likely to be 3',5'-dimethoxynaringenin chalcone or sinapoyltriatic acid lactone, potential products of the concerted action of 4-coumarate CoA ligase and chalcone synthase on sinapic acid). Also shown to be required for Arabidopsis nonhost resistance to the Asian soybean rust pathogen Phakopsora pachyrhizi. |   |               |                 |           |                                                                                                     | 188.06  | 75.70   | 2.48 | 3.65E-05 | 2.88E-04 |
| 1440                                                                                                                                                                                                                                                                                                                                                                                                                                                                                                            | 3 | F2-3 vs. L2-3 | 258167_at       | AT3G21560 |                                                                                                     |         |         |      |          |          |
| 1441                                                                                                                                                                                                                                                                                                                                                                                                                                                                                                            | 3 | F2-3 vs. L2-3 | 255590_at       | AT4G01610 | Encodes a capase involved in stress induced cell death. Activity detected in leaf and cell culture. | 2149.37 | 867.86  | 2.48 | 2.85E-04 | 1.24E-03 |
| 1442                                                                                                                                                                                                                                                                                                                                                                                                                                                                                                            | 3 | F2-3 vs. L2-3 | 250991_at       | AT5G02380 | cysteine-rich protein with copper-binding activity                                                  | 8182.97 | 3303.85 | 2.48 | 1.86E-05 | 1.83E-04 |
| encodes a member of the DREB subfamily A-4 of ERF/AP2 transcription factor family. The protein contains one AP2 domain. There are 17 members in this subfamily including TINY.                                                                                                                                                                                                                                                                                                                                  |   |               |                 |           |                                                                                                     | 50.41   | 20.44   | 2.47 | 8.30E-06 | 1.05E-04 |
| 1443                                                                                                                                                                                                                                                                                                                                                                                                                                                                                                            | 3 | F2-3 vs. L2-3 | 261059_at       | AT1G01250 |                                                                                                     | 174.40  | 70.68   | 2.47 | 1.26E-05 | 1.40E-04 |
| 1444                                                                                                                                                                                                                                                                                                                                                                                                                                                                                                            | 3 | F2-3 vs. L2-3 | 262326_at       | AT1G64140 | WRKY transcription factor;(source:Araport11)                                                        |         |         |      |          |          |

|      |   |               |           |           |                                                                                                                                                                                                                                                                                                                                                                                                                                                                                                                                                                                                                            |        |        |      |          |          |
|------|---|---------------|-----------|-----------|----------------------------------------------------------------------------------------------------------------------------------------------------------------------------------------------------------------------------------------------------------------------------------------------------------------------------------------------------------------------------------------------------------------------------------------------------------------------------------------------------------------------------------------------------------------------------------------------------------------------------|--------|--------|------|----------|----------|
|      |   |               |           |           | Boron transporter. Protein accumulates in shoots and roots under conditions of boron deficiency and is degraded within several hours of restoring boron supply. Localized to the plasma membrane under B limitation, and to the cytoplasm after B application before degradation. Protein is transferred via the endosomes to the vacuole for degradation. Localized to the inner plasma membrane domain in the columella, lateral root cap, epidermis, and endodermis in the root tip region, and in the epidermis and endodermis in the elongation zone. Under high-boron is transported to the vacuole for degradation. |        |        |      |          |          |
| 1445 | 3 | F2-3 vs. L2-3 | 263319_at | AT2G47160 | Glutathione S-transferase family protein;(source:Araport11)                                                                                                                                                                                                                                                                                                                                                                                                                                                                                                                                                                | 70.66  | 28.62  | 2.47 | 3.85E-05 | 3.01E-04 |
| 1446 | 3 | F2-3 vs. L2-3 | 250967_at | AT5G02790 | NAD(P)-binding Rossmann-fold superfamily protein;(source:Araport11)                                                                                                                                                                                                                                                                                                                                                                                                                                                                                                                                                        | 205.66 | 83.18  | 2.47 | 9.30E-06 | 1.13E-04 |
| 1447 | 3 | F2-3 vs. L2-3 | 261084_at | AT1G07440 | Encodes the electron transfer flavoprotein ETF alpha, a putative subunit of the mitochondrial electron transfer flavoprotein complex (ETF beta is At5g43430.1) in Arabidopsis. Mutations of the ETF beta gene results in accelerated senescence and early death compared to wild-type during extended darkness.                                                                                                                                                                                                                                                                                                            | 103.82 | 42.26  | 2.46 | 5.51E-05 | 3.89E-04 |
| 1448 | 3 | F2-3 vs. L2-3 | 256209_at | AT1G50940 | Encodes a protein that might have inorganic pyrophosphatase activity.                                                                                                                                                                                                                                                                                                                                                                                                                                                                                                                                                      | 103.11 | 41.99  | 2.46 | 2.44E-05 | 2.16E-04 |
| 1449 | 3 | F2-3 vs. L2-3 | 255587_at | AT4G01480 | dihydrofolate reductase;(source:Araport11)                                                                                                                                                                                                                                                                                                                                                                                                                                                                                                                                                                                 | 58.00  | 23.59  | 2.46 | 3.20E-05 | 2.61E-04 |
| 1450 | 3 | F2-3 vs. L2-3 | 254158_at | AT4G24380 |                                                                                                                                                                                                                                                                                                                                                                                                                                                                                                                                                                                                                            | 135.01 | 54.85  | 2.46 | 3.60E-06 | 5.76E-05 |
| 1451 | 3 | F2-3 vs. L2-3 | 254077_at | AT4G25640 | Encodes a multidrug and toxin efflux family transporter. Involved in flavonoid metabolism, affecting root growth, seed development and germination, and pollen development, release and viability.                                                                                                                                                                                                                                                                                                                                                                                                                         | 228.69 | 92.79  | 2.46 | 2.90E-05 | 2.44E-04 |
| 1452 | 3 | F2-3 vs. L2-3 | 246947_at | AT5G25120 | putative cytochrome P450 The mRNA is cell-to-cell mobile.                                                                                                                                                                                                                                                                                                                                                                                                                                                                                                                                                                  | 59.77  | 24.26  | 2.46 | 4.34E-05 | 3.28E-04 |
| 1453 | 3 | F2-3 vs. L2-3 | 247593_at | AT5G60790 | member of GCN subfamily                                                                                                                                                                                                                                                                                                                                                                                                                                                                                                                                                                                                    | 404.49 | 164.65 | 2.46 | 4.40E-06 | 6.55E-05 |
| 1454 | 3 | F2-3 vs. L2-3 | 261105_at | AT1G63000 | nucleotide-rhamnose synthase/epimerase-reductase;(source:Araport11)                                                                                                                                                                                                                                                                                                                                                                                                                                                                                                                                                        | 161.50 | 65.90  | 2.45 | 1.65E-05 | 1.69E-04 |
| 1455 | 3 | F2-3 vs. L2-3 | 258748_at | AT3G05930 | germin-like protein (GLP8)                                                                                                                                                                                                                                                                                                                                                                                                                                                                                                                                                                                                 | 58.59  | 23.93  | 2.45 | 3.01E-05 | 2.52E-04 |
| 1456 | 3 | F2-3 vs. L2-3 | 249771_at | AT5G24080 | Protein kinase superfamily protein;(source:Araport11)                                                                                                                                                                                                                                                                                                                                                                                                                                                                                                                                                                      | 37.09  | 15.13  | 2.45 | 1.95E-05 | 1.88E-04 |
| 1457 | 3 | F2-3 vs. L2-3 | 246802_at | AT5G27000 | Encodes a kinesin-like protein that binds microtubules in an ATP-dependent manner.                                                                                                                                                                                                                                                                                                                                                                                                                                                                                                                                         | 42.61  | 17.41  | 2.45 | 2.63E-05 | 2.28E-04 |
| 1458 | 3 | F2-3 vs. L2-3 | 248531_at | AT5G49950 | alpha/beta-Hydrolases superfamily protein;(source:Araport11)                                                                                                                                                                                                                                                                                                                                                                                                                                                                                                                                                               | 376.53 | 153.58 | 2.45 | 2.13E-04 | 1.00E-03 |
| 1459 | 3 | F2-3 vs. L2-3 | 259460_at | AT1G44000 | STAY-GREEN-like protein;(source:Araport11)                                                                                                                                                                                                                                                                                                                                                                                                                                                                                                                                                                                 | 151.05 | 62.00  | 2.44 | 3.11E-04 | 1.33E-03 |
| 1460 | 3 | F2-3 vs. L2-3 | 265741_at | AT2G01320 | ABC-2 type transporter family protein;(source:Araport11)                                                                                                                                                                                                                                                                                                                                                                                                                                                                                                                                                                   | 57.14  | 23.43  | 2.44 | 4.75E-05 | 3.49E-04 |
| 1461 | 3 | F2-3 vs. L2-3 | 251218_at | AT3G62410 | CP12-2 encodes a small peptide found in the chloroplast stroma. It belongs to the CP12 gene family thought to be involved in the formation of a supramolecular complex with glyceraldehyde-3-phosphate dehydrogenase (GAPDH) and phosphoribulokinase (PRK) embedded in the Calvin cycle. CP12-2 is coordinately regulated by light with the photosynthetic GAPDH and PRK. The annotation of this gene is based on article 32494. The mRNA is cell-to-cell mobile.                                                                                                                                                          | 101.48 | 41.62  | 2.44 | 1.08E-04 | 6.22E-04 |
| 1462 | 3 | F2-3 vs. L2-3 | 253343_at | AT4G33540 | metallo-beta-lactamase family protein;(source:Araport11)                                                                                                                                                                                                                                                                                                                                                                                                                                                                                                                                                                   | 69.63  | 28.52  | 2.44 | 1.93E-05 | 1.87E-04 |
| 1463 | 3 | F2-3 vs. L2-3 | 265400_at | AT2G10940 | Bifunctional inhibitor/lipid-transfer protein/seed storage 2S albumin superfamily protein;(source:Araport11)                                                                                                                                                                                                                                                                                                                                                                                                                                                                                                               | 85.14  | 35.08  | 2.43 | 4.20E-05 | 3.21E-04 |
| 1464 | 3 | F2-3 vs. L2-3 | 267517_at | AT2G30520 | light inducible root phototropism 2 encoding a signal transducer of the phototropic response in Arabidopsis                                                                                                                                                                                                                                                                                                                                                                                                                                                                                                                | 34.39  | 14.18  | 2.43 | 1.62E-04 | 8.26E-04 |
| 1465 | 3 | F2-3 vs. L2-3 | 254491_at | AT4G20300 | Serine/Threonine-kinase, putative (DUF1639);(source:Araport11)                                                                                                                                                                                                                                                                                                                                                                                                                                                                                                                                                             | 235.89 | 96.90  | 2.43 | 1.00E-05 | 1.18E-04 |
| 1466 | 3 | F2-3 vs. L2-3 | 253846_at | AT4G28000 | P-loop containing nucleoside triphosphate hydrolases superfamily protein;(source:Araport11)                                                                                                                                                                                                                                                                                                                                                                                                                                                                                                                                | 38.55  | 15.90  | 2.43 | 1.18E-04 | 6.62E-04 |
| 1467 | 3 | F2-3 vs. L2-3 | 253551_at | AT4G30996 | NKS1, a plant-specific gene, encodes a 19 kDa endomembrane-localized protein. It is part of SOS independent ion homeostasis regulation pathway. Encodes one of the homologs of the yeast CCR4-associated factor 1: AT3G44260 (CAF1a), AT5G22250 (CAF1b). Has mRNA deadenylation activity. Also plays a role in plant defense responses.                                                                                                                                                                                                                                                                                    | 675.67 | 278.11 | 2.43 | 4.50E-06 | 6.65E-05 |
| 1468 | 3 | F2-3 vs. L2-3 | 249928_at | AT5G22250 | acetyl CoA:(Z)-3-hexen-1-ol acetyltransferase;(source:Araport11)                                                                                                                                                                                                                                                                                                                                                                                                                                                                                                                                                           | 93.92  | 38.63  | 2.43 | 2.90E-06 | 5.02E-05 |
| 1469 | 3 | F2-3 vs. L2-3 | 259054_at | AT3G03480 |                                                                                                                                                                                                                                                                                                                                                                                                                                                                                                                                                                                                                            | 44.10  | 18.25  | 2.42 | 6.90E-06 | 9.18E-05 |
| 1470 | 3 | F2-3 vs. L2-3 | 258399_at | AT3G15540 | Primary auxin-responsive gene. Involved in the regulation stamen filaments development. Bifunctional inhibitor/lipid-transfer protein/seed storage 2S albumin superfamily protein;(source:Araport11)                                                                                                                                                                                                                                                                                                                                                                                                                       | 323.07 | 133.73 | 2.42 | 1.37E-05 | 1.50E-04 |
| 1471 | 3 | F2-3 vs. L2-3 | 251928_at | AT3G53980 | Uncharacterized protein family (UPF0497);(source:Araport11)                                                                                                                                                                                                                                                                                                                                                                                                                                                                                                                                                                | 104.89 | 43.32  | 2.42 | 1.78E-05 | 1.78E-04 |
| 1472 | 3 | F2-3 vs. L2-3 | 245501_at | AT4G15620 | JMJ18 encodes a novel JmjC domain- containing histone H3K4 demethylase.                                                                                                                                                                                                                                                                                                                                                                                                                                                                                                                                                    | 69.04  | 28.48  | 2.42 | 1.40E-06 | 3.16E-05 |
| 1473 | 3 | F2-3 vs. L2-3 | 264528_at | AT1G30810 | alpha/beta-Hydrolases superfamily protein;(source:Araport11)                                                                                                                                                                                                                                                                                                                                                                                                                                                                                                                                                               | 50.80  | 21.05  | 2.41 | 2.67E-05 | 2.30E-04 |
| 1474 | 3 | F2-3 vs. L2-3 | 260297_at | AT1G80280 |                                                                                                                                                                                                                                                                                                                                                                                                                                                                                                                                                                                                                            | 71.65  | 29.77  | 2.41 | 1.72E-04 | 8.59E-04 |
| 1475 | 3 | F2-3 vs. L2-3 | 266765_at | AT2G46860 | Encodes a protein that might have inorganic pyrophosphatase activity.                                                                                                                                                                                                                                                                                                                                                                                                                                                                                                                                                      | 54.10  | 22.48  | 2.41 | 1.07E-04 | 6.21E-04 |

|      |   |               |            |           |                                                                                                                                                                                                                                                                                                                                                                                                                                                                                                                                                                                                                                                    |        |        |      |          |          |
|------|---|---------------|------------|-----------|----------------------------------------------------------------------------------------------------------------------------------------------------------------------------------------------------------------------------------------------------------------------------------------------------------------------------------------------------------------------------------------------------------------------------------------------------------------------------------------------------------------------------------------------------------------------------------------------------------------------------------------------------|--------|--------|------|----------|----------|
| 1476 | 3 | F2-3 vs. L2-3 | 259003_at  | AT3G02010 | Pentatricopeptide repeat (PPR) superfamily protein;(source:Araport11)                                                                                                                                                                                                                                                                                                                                                                                                                                                                                                                                                                              | 271.07 | 112.60 | 2.41 | 4.30E-05 | 3.26E-04 |
| 1477 | 3 | F2-3 vs. L2-3 | 258729_at  | AT3G11900 | encodes an amino acid transporter that transports aromatic and neutral amino acids, IAA, and 2,4-D. Expressed in all tissues with highest abundance in flowers and cauline leaves. a member of a small gene family in Arabidopsis and represents a new class of amino acid transporters.                                                                                                                                                                                                                                                                                                                                                           | 498.45 | 206.99 | 2.41 | 1.50E-04 | 7.83E-04 |
| 1478 | 3 | F2-3 vs. L2-3 | 253525_at  | AT4G31330 | transmembrane protein, putative (Protein of unknown function, DUF599);(source:Araport11)                                                                                                                                                                                                                                                                                                                                                                                                                                                                                                                                                           | 39.27  | 16.29  | 2.41 | 8.90E-06 | 1.10E-04 |
| 1479 | 3 | F2-3 vs. L2-3 | 261135_at  | AT1G19610 | Predicted to encode a PR (pathogenesis-related) protein. Belongs to the plant defensin (PDF) family with the following members: At1g75830/PDF1.1, At5g44420/PDF1.2a, At2g26020/PDF1.2b, At5g44430/PDF1.2c, At2g26010/PDF1.3, At1g19610/PDF1.4, At1g55010/PDF1.5, At2g02120/PDF2.1, At2g02100/PDF2.2, At2g02130/PDF2.3, At1g61070/PDF2.4, At5g63660/PDF2.5, At2g02140/PDF2.6, At5g38330/PDF3.1 and At4g30070/PDF3.2.                                                                                                                                                                                                                                | 47.38  | 19.78  | 2.40 | 1.48E-05 | 1.57E-04 |
| 1480 | 3 | F2-3 vs. L2-3 | 258416_at  | AT3G17310 | Encodes DRM3 (Domains Rearranged Methyltransferase3), a catalytically mutated paralog of the cytosine methyltransferase DRM2. Despite being catalytically mutated, DRM3 is required for normal maintenance of non-CG DNA methylation, establishment of RNA-directed DNA methylation triggered by repeat sequences and accumulation of repeat-associated small RNAs.                                                                                                                                                                                                                                                                                | 66.10  | 27.56  | 2.40 | 6.80E-05 | 4.47E-04 |
| 1481 | 3 | F2-3 vs. L2-3 | 257021_at  | AT3G19710 | Belongs to the branched-chain amino acid aminotransferase gene family. Encodes a methionine-oxo-acid transaminase. Involved in the methionine chain elongation pathway that leads to the ultimate biosynthesis of methionine-derived glucosinolates.                                                                                                                                                                                                                                                                                                                                                                                               | 35.05  | 14.59  | 2.40 | 6.38E-05 | 4.30E-04 |
| 1482 | 3 | F2-3 vs. L2-3 | 251762_at  | AT3G55800 | Encodes the chloroplast enzyme sedoheptulose-1,7-bisphosphatase (SBPase), involved in the carbon reduction of the Calvin cycle. Increase in SBPase activity in transgenic lines accumulate up to 50% more sucrose and starch than wild-type. The mRNA is cell-to-cell mobile.                                                                                                                                                                                                                                                                                                                                                                      | 817.23 | 340.02 | 2.40 | 2.05E-05 | 1.92E-04 |
| 1483 | 3 | F2-3 vs. L2-3 | 253137_at  | AT4G35500 | Protein kinase superfamily protein;(source:Araport11)                                                                                                                                                                                                                                                                                                                                                                                                                                                                                                                                                                                              | 148.65 | 61.88  | 2.40 | 4.00E-07 | 1.25E-05 |
| 1484 | 3 | F2-3 vs. L2-3 | 248746_at  | AT5G47890 | NADH-ubiquinone oxidoreductase B8 subunit;(source:Araport11)                                                                                                                                                                                                                                                                                                                                                                                                                                                                                                                                                                                       | 579.63 | 242.57 | 2.39 | 5.63E-05 | 3.95E-04 |
| 1485 | 3 | F2-3 vs. L2-3 | 260730_at  | AT1G48030 | Encodes a mitochondrial lipoamide dehydrogenase whose expression is induced by light.                                                                                                                                                                                                                                                                                                                                                                                                                                                                                                                                                              | 386.51 | 162.39 | 2.38 | 9.22E-05 | 5.56E-04 |
| 1486 | 3 | F2-3 vs. L2-3 | 245724_at  | AT1G73390 | Endosomal targeting BRO1-like domain-containing protein;(source:Araport11)                                                                                                                                                                                                                                                                                                                                                                                                                                                                                                                                                                         | 69.52  | 29.25  | 2.38 | 3.06E-05 | 2.54E-04 |
| 1487 | 3 | F2-3 vs. L2-3 | 252617_at  | AT3G45100 | encodes Arabidopsis homolog of a conserved protein involved in the first step of the GPI biosynthetic pathway.                                                                                                                                                                                                                                                                                                                                                                                                                                                                                                                                     | 342.92 | 144.25 | 2.38 | 8.38E-05 | 5.21E-04 |
| 1488 | 3 | F2-3 vs. L2-3 | 253963_at  | AT4G26470 | Calcium-binding EF-hand family protein;(source:Araport11)                                                                                                                                                                                                                                                                                                                                                                                                                                                                                                                                                                                          | 45.13  | 18.96  | 2.38 | 1.68E-05 | 1.72E-04 |
| 1489 | 3 | F2-3 vs. L2-3 | 246429_at  | AT5G17450 | Heavy metal transport/detoxification superfamily protein;(source:Araport11)                                                                                                                                                                                                                                                                                                                                                                                                                                                                                                                                                                        | 34.99  | 14.72  | 2.38 | 1.05E-05 | 1.22E-04 |
| 1490 | 3 | F2-3 vs. L2-3 | 264365_s_a | AT1G03230 | Eukaryotic aspartyl protease family protein;(source:Araport11)                                                                                                                                                                                                                                                                                                                                                                                                                                                                                                                                                                                     | 195.72 | 82.62  | 2.37 | 4.00E-07 | 1.25E-05 |
| 1491 | 3 | F2-3 vs. L2-3 | 267157_at  | AT2G37630 | Encodes a MYB-domain protein involved in specification of the leaf proximodistal axis. Mutation results in lobed and dissected leaves with a characteristic asymmetry. Homologous to the Antirrhinum PHANTASTICA (PHAN) and maize ROUGH SHEATH2 (RS2) genes Asymmetric placement of auxin response at the distal leaf tip precedes visible asymmetric leaf growth. Acts alongside AXR1 to exclude BP expression in leaves and with PIN1 to repress BP and promote lateral organ growth. Interacts physically with AS2 to form a complex that binds to the BP promoter and silences BP. Also functions as a regulator of the plant immune response. | 221.32 | 93.51  | 2.37 | 3.70E-06 | 5.84E-05 |
| 1492 | 3 | F2-3 vs. L2-3 | 247156_at  | AT5G65760 | Serine carboxypeptidase S28 family protein;(source:Araport11)                                                                                                                                                                                                                                                                                                                                                                                                                                                                                                                                                                                      | 247.13 | 104.38 | 2.37 | 2.14E-05 | 1.97E-04 |
| 1493 | 3 | F2-3 vs. L2-3 | 261033_at  | AT1G17380 | jasmonate-zim-domain protein 5;(source:Araport11)                                                                                                                                                                                                                                                                                                                                                                                                                                                                                                                                                                                                  | 243.88 | 103.23 | 2.36 | 1.43E-05 | 1.53E-04 |
| 1494 | 3 | F2-3 vs. L2-3 | 258677_at  | AT3G08730 | Encodes a protein-serine kinase that phosphorylates ribosomal protein in vitro. Activation of AtS6k is regulated by 1-naphthylacetic acid and kinetin, at least in part, via a lipid kinase-dependent pathway. Involved in translational up-regulation of ribosomal proteins. Phosphorylated by PDK1. Interacts with RAPTOR1, which in turn interacts with TOR. SPK6 activity is affected by osmotic stress, and plants overexpressing S6k1 are hypersensitive to osmotic stress. The gene is expressed in all tissues examined, with highest expression level detected in metabolically active tissues.                                           | 30.73  | 13.01  | 2.36 | 9.34E-05 | 5.59E-04 |

|      |   |               |            |           |                                                                                                                                                                                                                                                                                                                                                                                                                                                                                                                                                         |         |        |      |          |          |
|------|---|---------------|------------|-----------|---------------------------------------------------------------------------------------------------------------------------------------------------------------------------------------------------------------------------------------------------------------------------------------------------------------------------------------------------------------------------------------------------------------------------------------------------------------------------------------------------------------------------------------------------------|---------|--------|------|----------|----------|
| 1495 | 3 | F2-3 vs. L2-3 | 245286_at  | AT4G14880 | Encodes a cytosolic isoform of cytosolic O-acetylserine(thiol)lyase, a key enzyme in cysteine biosynthesis and for the fixation of inorganic sulfide. It catalyzes the formation of cysteine from O-acetylserine and inorganic sulfide. Gene expression is predominant in the root cortex and the xylem parenchyma. Gene expression is induced in leave, stems and roots by high salt and heavy metal stresses, mediated by ABA. Lines carrying semi-dominant mutations exhibit early senescence. Required for pollen tube growth and/or fertilization. | 842.26  | 357.33 | 2.36 | 1.58E-04 | 8.13E-04 |
| 1496 | 3 | F2-3 vs. L2-3 | 262179_at  | AT1G77980 | Encodes a member of the MIKC (MADS box, Keratin binding domain, and C terminal domain containing )family of transcriptional regulators. AGL66 is expressed in pollen.It forms heterodimers with other MICK family members (AGL104). Involved in late stages of pollen development and pollen tube growth.                                                                                                                                                                                                                                               | 53.90   | 22.92  | 2.35 | 2.13E-04 | 1.00E-03 |
| 1497 | 3 | F2-3 vs. L2-3 | 266181_at  | AT2G02390 | Encodes glutathione transferase belonging to the zeta class of GSTs. Naming convention according to Wagner et al. (2002). The protein undergoes spontaneous thiolation following treatment with the oxidant tert-butylhydroperoxide. It functions in vitro as a maleylacetoacetate isomerase and is likely to be involved in tyrosine catabolism.                                                                                                                                                                                                       | 129.67  | 55.14  | 2.35 | 1.14E-04 | 6.47E-04 |
| 1498 | 3 | F2-3 vs. L2-3 | 257253_at  | AT3G24190 | Protein kinase superfamily protein;(source:Araport11)                                                                                                                                                                                                                                                                                                                                                                                                                                                                                                   | 100.96  | 43.00  | 2.35 | 1.13E-05 | 1.28E-04 |
| 1499 | 3 | F2-3 vs. L2-3 | 251854_at  | AT3G54800 | Pleckstrin homology (PH) and lipid-binding START domains-containing protein;(source:Araport11)                                                                                                                                                                                                                                                                                                                                                                                                                                                          | 66.92   | 28.48  | 2.35 | 9.22E-05 | 5.56E-04 |
| 1500 | 3 | F2-3 vs. L2-3 | 267187_s_a | AT3G59970 | methylenetetrahydrofolate reductase MTHFR1 mRNA, complete                                                                                                                                                                                                                                                                                                                                                                                                                                                                                               | 635.88  | 270.04 | 2.35 | 4.55E-05 | 3.40E-04 |
| 1501 | 3 | F2-3 vs. L2-3 | 245619_at  | AT4G13990 | Exostosin family protein;(source:Araport11)                                                                                                                                                                                                                                                                                                                                                                                                                                                                                                             | 56.99   | 24.23  | 2.35 | 4.25E-05 | 3.24E-04 |
| 1502 | 3 | F2-3 vs. L2-3 | 253730_at  | AT4G29480 | Mitochondrial ATP synthase subunit G protein;(source:Araport11)                                                                                                                                                                                                                                                                                                                                                                                                                                                                                         | 97.57   | 41.54  | 2.35 | 8.30E-06 | 1.05E-04 |
| 1503 | 3 | F2-3 vs. L2-3 | 252880_at  | AT4G39730 | PLAT1 domain stress protein family member. Involved in mediating response to stresses such as pathogen infection. It is found in endoplasmic reticulum bodies. PLAT1 is induced by pathogenic fungi and induces the production of scopolin.                                                                                                                                                                                                                                                                                                             | 1176.17 | 499.88 | 2.35 | 3.23E-04 | 1.36E-03 |
| 1504 | 3 | F2-3 vs. L2-3 | 245683_at  | AT5G22030 | ubiquitin-specific protease 8;(source:Araport11)                                                                                                                                                                                                                                                                                                                                                                                                                                                                                                        | 97.79   | 41.68  | 2.35 | 3.15E-04 | 1.33E-03 |
| 1505 | 3 | F2-3 vs. L2-3 | 266000_at  | AT2G24180 | Encodes a cytochrome P450 monooxygenase that converts indole-3-acetonitrile to indole-3-aldehyde / indole-3-carboxylic acid and cyanide. The mRNA is cell-to-cell mobile.                                                                                                                                                                                                                                                                                                                                                                               | 52.59   | 22.52  | 2.34 | 1.67E-04 | 8.43E-04 |
| 1506 | 3 | F2-3 vs. L2-3 | 263249_at  | AT2G31360 | Encodes a protein homologous to delta 9 acyl-lipid desaturases of cyanobacteria and acyl-CoA desaturases of yeast and mammals. expression up-regulated by cold temperature. It is involved in the synthesis of the 24:1n-9 and 26:1n-9 components of seed lipids, sphingolipids and the membrane phospholipids phosphatidylserine (PS), and phosphatidylethanolamine (PE).                                                                                                                                                                              | 326.42  | 139.74 | 2.34 | 8.20E-06 | 1.05E-04 |
| 1507 | 3 | F2-3 vs. L2-3 | 252009_at  | AT3G52800 | A20/AN1-like zinc finger family protein;(source:Araport11)                                                                                                                                                                                                                                                                                                                                                                                                                                                                                              | 255.63  | 109.30 | 2.34 | 4.72E-04 | 1.79E-03 |
| 1508 | 3 | F2-3 vs. L2-3 | 264558_at  | AT1G09600 | Protein kinase superfamily protein;(source:Araport11)                                                                                                                                                                                                                                                                                                                                                                                                                                                                                                   | 63.47   | 27.29  | 2.33 | 2.10E-06 | 4.08E-05 |
| 1509 | 3 | F2-3 vs. L2-3 | 262803_at  | AT1G21000 | PLATZ transcription factor family protein;(source:Araport11)                                                                                                                                                                                                                                                                                                                                                                                                                                                                                            | 56.89   | 24.40  | 2.33 | 4.53E-04 | 1.74E-03 |
| 1510 | 3 | F2-3 vs. L2-3 | 255345_at  | AT4G04460 | Saposin-like aspartyl protease family protein;(source:Araport11)                                                                                                                                                                                                                                                                                                                                                                                                                                                                                        | 50.52   | 21.68  | 2.33 | 9.17E-04 | 3.00E-03 |
| 1511 | 3 | F2-3 vs. L2-3 | 262634_at  | AT1G06690 | NAD(P)-linked oxidoreductase superfamily protein;(source:Araport11)                                                                                                                                                                                                                                                                                                                                                                                                                                                                                     | 117.26  | 50.57  | 2.32 | 1.60E-05 | 1.66E-04 |
| 1512 | 3 | F2-3 vs. L2-3 | 251524_at  | AT3G58990 | isopropylmalate isomerase 1;(source:Araport11)                                                                                                                                                                                                                                                                                                                                                                                                                                                                                                          | 51.74   | 22.33  | 2.32 | 2.46E-04 | 1.11E-03 |
| 1513 | 3 | F2-3 vs. L2-3 | 255259_at  | AT4G05020 | Mitochondrial alternative NADH dehydrogenase.                                                                                                                                                                                                                                                                                                                                                                                                                                                                                                           | 148.91  | 64.49  | 2.31 | 5.50E-06 | 7.84E-05 |
| 1514 | 3 | F2-3 vs. L2-3 | 267005_at  | AT2G34460 | NAD(P)-binding Rossmann-fold superfamily protein;(source:Araport11)                                                                                                                                                                                                                                                                                                                                                                                                                                                                                     | 171.64  | 74.78  | 2.30 | 5.90E-05 | 4.08E-04 |
| 1515 | 3 | F2-3 vs. L2-3 | 251738_at  | AT3G56150 | member of eIF3c - eukaryotic initiation factor 3c                                                                                                                                                                                                                                                                                                                                                                                                                                                                                                       | 64.44   | 28.10  | 2.29 | 8.76E-05 | 5.35E-04 |
| 1516 | 3 | F2-3 vs. L2-3 | 249469_at  | AT5G39320 | UDP-glucose 6-dehydrogenase family protein;(source:Araport11)                                                                                                                                                                                                                                                                                                                                                                                                                                                                                           | 348.57  | 152.15 | 2.29 | 4.46E-04 | 1.72E-03 |
| 1517 | 3 | F2-3 vs. L2-3 | 260007_at  | AT1G67870 | glycine-rich protein;(source:Araport11)                                                                                                                                                                                                                                                                                                                                                                                                                                                                                                                 | 41.96   | 18.39  | 2.28 | 5.72E-05 | 4.00E-04 |
| 1518 | 3 | F2-3 vs. L2-3 | 252107_at  | AT3G51490 | tonoplast monosaccharide transporter3;(source:Araport11)                                                                                                                                                                                                                                                                                                                                                                                                                                                                                                | 58.30   | 25.54  | 2.28 | 1.99E-05 | 1.89E-04 |
| 1519 | 3 | F2-3 vs. L2-3 | 251277_at  | AT3G61760 | DYNAMIN-like 1B;(source:Araport11)                                                                                                                                                                                                                                                                                                                                                                                                                                                                                                                      | 33.96   | 14.91  | 2.28 | 4.20E-06 | 6.33E-05 |
| 1520 | 3 | F2-3 vs. L2-3 | 253736_at  | AT4G28780 | GDSL-motif esterase/acyltransferase/lipase. Enzyme group with broad substrate specificity that may catalyze acyltransfer or hydrolase reactions with lipid and non-lipid substrates. Encodes a protein of the chloroplastic NAD(P)H dehydrogenase complex (NDH Complex) involved in respiration, photosystem I (PSI) cyclic electron transport and CO2 uptake. The product of this gene appears to be essential for the stable formation of the NDH Complex. The mRNA is cell-to-cell mobile.                                                           | 52.56   | 23.10  | 2.28 | 2.09E-04 | 9.88E-04 |
| 1521 | 3 | F2-3 vs. L2-3 | 249472_at  | AT5G39210 | Avr9/Cf-9 rapidly elicited protein;(source:Araport11)                                                                                                                                                                                                                                                                                                                                                                                                                                                                                                   | 25.16   | 11.03  | 2.28 | 5.10E-04 | 1.91E-03 |
| 1522 | 3 | F2-3 vs. L2-3 | 249284_at  | AT5G41810 | Encodes 1-aminocyclopropane-1-carboxylate oxidase                                                                                                                                                                                                                                                                                                                                                                                                                                                                                                       | 58.01   | 25.46  | 2.28 | 2.75E-05 | 2.35E-04 |
| 1523 | 3 | F2-3 vs. L2-3 | 265194_at  | AT1G05010 | Encodes protein kinase APK2b.                                                                                                                                                                                                                                                                                                                                                                                                                                                                                                                           | 70.78   | 31.11  | 2.27 | 6.29E-05 | 4.26E-04 |
| 1524 | 3 | F2-3 vs. L2-3 | 267486_at  | AT2G02800 |                                                                                                                                                                                                                                                                                                                                                                                                                                                                                                                                                         | 263.11  | 115.99 | 2.27 | 8.11E-05 | 5.07E-04 |

|      |   |               |            |           |                                                                                                                                                                                                                                                                                                                                                                                                                                                                                                                                                                                            |         |        |      |          |          |
|------|---|---------------|------------|-----------|--------------------------------------------------------------------------------------------------------------------------------------------------------------------------------------------------------------------------------------------------------------------------------------------------------------------------------------------------------------------------------------------------------------------------------------------------------------------------------------------------------------------------------------------------------------------------------------------|---------|--------|------|----------|----------|
|      |   |               |            |           | Encodes an alpha-dioxygenase involved in protection against oxidative stress and cell death. Induced in response to Salicylic acid and oxidative stress. Independent of NPR1 in induction by salicylic acid. The mRNA is cell-to-cell mobile.                                                                                                                                                                                                                                                                                                                                              | 36.53   | 16.06  | 2.27 | 2.34E-04 | 1.07E-03 |
| 1525 | 3 | F2-3 vs. L2-3 | 258957_at  | AT3G01420 | Leucine-rich repeat protein kinase family protein;(source:Araport11)                                                                                                                                                                                                                                                                                                                                                                                                                                                                                                                       | 413.63  | 182.59 | 2.27 | 1.80E-06 | 3.80E-05 |
| 1526 | 3 | F2-3 vs. L2-3 | 259348_at  | AT3G03770 | Calcium-dependent ARF-type GTPase activating protein family;(source:Araport11)                                                                                                                                                                                                                                                                                                                                                                                                                                                                                                             | 252.61  | 111.43 | 2.27 | 5.38E-04 | 1.99E-03 |
| 1527 | 3 | F2-3 vs. L2-3 | 258689_at  | AT3G07940 | Encodes a protein with novel repeat sequences and a glycine-rich domain which has a 53% identity to GRP1, a petunia glycine-rich cell wall protein.                                                                                                                                                                                                                                                                                                                                                                                                                                        |         |        |      |          |          |
| 1528 | 3 | F2-3 vs. L2-3 | 258392_at  | AT3G15400 | NdhV is loosely associated with the NDH complex and is required for stabilizing NDH subcomplexes A and E.                                                                                                                                                                                                                                                                                                                                                                                                                                                                                  | 53.07   | 23.34  | 2.27 | 1.19E-05 | 1.33E-04 |
| 1529 | 3 | F2-3 vs. L2-3 | 263410_at  | AT2G04039 | Pectin lyase-like superfamily protein;(source:Araport11)                                                                                                                                                                                                                                                                                                                                                                                                                                                                                                                                   | 34.76   | 15.35  | 2.26 | 6.12E-05 | 4.19E-04 |
| 1530 | 3 | F2-3 vs. L2-3 | 265174_s_a | AT1G23460 | Sulfite exporter TauE/SafE family protein;(source:Araport11)                                                                                                                                                                                                                                                                                                                                                                                                                                                                                                                               | 33.02   | 14.68  | 2.25 | 2.59E-04 | 1.16E-03 |
| 1531 | 3 | F2-3 vs. L2-3 | 265203_at  | AT2G36630 | Encodes an RNA?binding protein involved in stress granule formation. Regulated by a transposable element small RNA. Also known as SENESENCE-ASSOCIATED GENE 21 (SAG21). Has a role on oxidative stress tolerance. mRNA levels are elevated in response to various stresses.                                                                                                                                                                                                                                                                                                                | 102.54  | 45.59  | 2.25 | 2.01E-04 | 9.60E-04 |
| 1532 | 3 | F2-3 vs. L2-3 | 255479_at  | AT4G02380 | arabinogalactan-protein family;(source:Araport11)                                                                                                                                                                                                                                                                                                                                                                                                                                                                                                                                          | 106.65  | 47.34  | 2.25 | 8.82E-04 | 2.91E-03 |
| 1533 | 3 | F2-3 vs. L2-3 | 245318_at  | AT4G16980 | Encodes an RNA?binding protein involved in stress granule formation. Regulated by a transposable element small RNA.                                                                                                                                                                                                                                                                                                                                                                                                                                                                        | 30.29   | 13.44  | 2.25 | 8.86E-05 | 5.38E-04 |
| 1534 | 3 | F2-3 vs. L2-3 | 261040_at  | AT1G17370 | Encodes a thioredoxin localized in chloroplast stroma. Known as CDSP32 (CHLOROPLASTIC DROUGHT-INDUCED STRESS PROTEIN OF 32 KD).                                                                                                                                                                                                                                                                                                                                                                                                                                                            | 343.46  | 153.34 | 2.24 | 7.82E-04 | 2.64E-03 |
| 1535 | 3 | F2-3 vs. L2-3 | 261751_at  | AT1G76080 | Encodes HYR1, a UDP glucosyltransferase (UGT). HYR1 glucosylates hypostatin, an inhibitor of cell expansion in vivo to form a bioactive glucoside.                                                                                                                                                                                                                                                                                                                                                                                                                                         | 136.79  | 61.15  | 2.24 | 8.42E-04 | 2.81E-03 |
| 1536 | 3 | F2-3 vs. L2-3 | 257954_at  | AT3G21760 | Translation initiation factor SUI1 family protein;(source:Araport11)                                                                                                                                                                                                                                                                                                                                                                                                                                                                                                                       | 97.36   | 43.55  | 2.24 | 2.31E-05 | 2.08E-04 |
| 1537 | 3 | F2-3 vs. L2-3 | 248146_at  | AT5G54940 | member of TAP subfamily                                                                                                                                                                                                                                                                                                                                                                                                                                                                                                                                                                    | 65.39   | 29.18  | 2.24 | 1.19E-04 | 6.65E-04 |
| 1538 | 3 | F2-3 vs. L2-3 | 260308_at  | AT1G70610 | Encodes glycine decarboxylase complex H protein. Involved in photorespiration. The mRNA is cell-to-cell mobile.                                                                                                                                                                                                                                                                                                                                                                                                                                                                            | 220.37  | 98.73  | 2.23 | 2.57E-05 | 2.25E-04 |
| 1539 | 3 | F2-3 vs. L2-3 | 266636_at  | AT2G35370 |                                                                                                                                                                                                                                                                                                                                                                                                                                                                                                                                                                                            | 43.96   | 19.71  | 2.23 | 4.80E-06 | 7.03E-05 |
| 1540 | 3 | F2-3 vs. L2-3 | 256673_at  | AT3G52370 | Fasciclin-like arabinogalactan protein. Possibly involved in embryogenesis and seed development.                                                                                                                                                                                                                                                                                                                                                                                                                                                                                           | 146.21  | 65.57  | 2.23 | 1.70E-04 | 8.51E-04 |
| 1541 | 3 | F2-3 vs. L2-3 | 248967_at  | AT5G45350 | proline-rich family protein;(source:Araport11)                                                                                                                                                                                                                                                                                                                                                                                                                                                                                                                                             | 651.96  | 291.93 | 2.23 | 3.55E-05 | 2.81E-04 |
| 1542 | 3 | F2-3 vs. L2-3 | 247222_at  | AT5G64840 | member of GCN subfamily                                                                                                                                                                                                                                                                                                                                                                                                                                                                                                                                                                    | 589.49  | 264.10 | 2.23 | 6.41E-04 | 2.27E-03 |
|      |   |               |            |           | Encodes a 3-hydroxy-3-methylglutaryl coenzyme A reductase, which is involved in melavonate biosynthesis and performs the first committed step in isoprenoid biosynthesis. Expression is activated in dark in leaf tissue but not controlled by light in the root (confine The mRNA is cell-to-cell mobile.                                                                                                                                                                                                                                                                                 |         |        |      |          |          |
| 1543 | 3 | F2-3 vs. L2-3 | 259983_at  | AT1G76490 | Encodes a scarecrow-like protein (SCL13). Member of GRAS gene family. Regulated by heat shock.                                                                                                                                                                                                                                                                                                                                                                                                                                                                                             | 67.70   | 30.54  | 2.22 | 9.22E-04 | 3.01E-03 |
| 1544 | 3 | F2-3 vs. L2-3 | 245247_at  | AT4G17230 |                                                                                                                                                                                                                                                                                                                                                                                                                                                                                                                                                                                            | 146.91  | 66.05  | 2.22 | 2.07E-04 | 9.84E-04 |
|      |   |               |            |           | Encodes an arginine decarboxylase (ADC), a rate-limiting enzyme that catalyzes the first step of polyamine (PA) biosynthesis via ADC pathway in Arabidopsis thaliana. Arabidopsis genome has two ADC paralogs, ADC1 and ADC2. ADC2 is stress-inducible (osmotic stress). Double mutant analysis showed that ADC genes are essential for the production of PA, and are required for normal seed development. Overexpression causes phenotypes similar to GA-deficient plants and these plants show reduced levels of GA due to lower expression levels of AtGA20ox1, AtGA3ox3 and AtGA3ox1. | 548.60  | 247.54 | 2.22 | 6.99E-05 | 4.55E-04 |
| 1545 | 3 | F2-3 vs. L2-3 | 253203_at  | AT4G34710 | SMT1 controls the level of cholesterol in plants                                                                                                                                                                                                                                                                                                                                                                                                                                                                                                                                           | 1223.04 | 551.22 | 2.22 | 4.76E-04 | 1.80E-03 |
| 1546 | 3 | F2-3 vs. L2-3 | 250254_at  | AT5G13710 | Subtilisin-like serine endopeptidase family protein;(source:Araport11)                                                                                                                                                                                                                                                                                                                                                                                                                                                                                                                     | 27.08   | 12.26  | 2.21 | 4.26E-05 | 3.24E-04 |
| 1547 | 3 | F2-3 vs. L2-3 | 245088_at  | AT2G39850 | Encodes a protein with beta-glucosidase and galactosyltransferase activity, mutants show increased sensitivity to freezing. Though it is classified as a family I glycosyl hydrolase, it has no hydrolase activity in vitro.                                                                                                                                                                                                                                                                                                                                                               |         |        |      |          |          |
| 1548 | 3 | F2-3 vs. L2-3 | 258512_at  | AT3G06510 |                                                                                                                                                                                                                                                                                                                                                                                                                                                                                                                                                                                            | 799.26  | 361.49 | 2.21 | 7.20E-04 | 2.48E-03 |
| 1549 | 3 | F2-3 vs. L2-3 | 256237_at  | AT3G12610 | Plays role in DNA-damage repair/toleration. Partially complements RecA- phenotypes.                                                                                                                                                                                                                                                                                                                                                                                                                                                                                                        | 165.67  | 74.94  | 2.21 | 9.20E-06 | 1.13E-04 |
| 1550 | 3 | F2-3 vs. L2-3 | 253420_at  | AT4G32260 | ATPase, F0 complex, subunit B/B, bacterial/chloroplast;(source:Araport11)                                                                                                                                                                                                                                                                                                                                                                                                                                                                                                                  | 655.28  | 296.63 | 2.21 | 3.20E-05 | 2.61E-04 |
| 1551 | 3 | F2-3 vs. L2-3 | 247989_at  | AT5G56350 | Pyruvate kinase family protein;(source:Araport11)                                                                                                                                                                                                                                                                                                                                                                                                                                                                                                                                          | 255.57  | 115.88 | 2.21 | 2.52E-04 | 1.13E-03 |
| 1552 | 3 | F2-3 vs. L2-3 | 266867_at  | AT2G45770 | chloroplast SRP receptor homolog, alpha subunit CPFTSY. Required for LHCP integration into isolated thylakoids.                                                                                                                                                                                                                                                                                                                                                                                                                                                                            | 77.36   | 35.10  | 2.20 | 9.26E-05 | 5.57E-04 |

|      |   |               |           |           |                                                                                                                                                                                                                                                                                                                                                                                                                                                                                                                                                                                                                                                                                                                                                                       |         |        |      |          |          |
|------|---|---------------|-----------|-----------|-----------------------------------------------------------------------------------------------------------------------------------------------------------------------------------------------------------------------------------------------------------------------------------------------------------------------------------------------------------------------------------------------------------------------------------------------------------------------------------------------------------------------------------------------------------------------------------------------------------------------------------------------------------------------------------------------------------------------------------------------------------------------|---------|--------|------|----------|----------|
| 1553 | 3 | F2-3 vs. L2-3 | 250207_at | AT5G13930 | Encodes chalcone synthase (CHS), a key enzyme involved in the biosynthesis of flavonoids. Required for the accumulation of purple anthocyanins in leaves and stems. Also involved in the regulation of auxin transport and the modulation of root gravitropism. The mRNA is cell-to-cell mobile.                                                                                                                                                                                                                                                                                                                                                                                                                                                                      | 69.31   | 31.52  | 2.20 | 7.53E-04 | 2.56E-03 |
| 1554 | 3 | F2-3 vs. L2-3 | 246620_at | AT5G36220 | This gene is a member of the CYP81D family of cytochrome p450s. It was originally called CYP91A1, but was later renamed to CYP81D1.                                                                                                                                                                                                                                                                                                                                                                                                                                                                                                                                                                                                                                   | 26.60   | 12.07  | 2.20 | 3.03E-05 | 2.53E-04 |
| 1555 | 3 | F2-3 vs. L2-3 | 255702_at | AT4G00230 | xylem serine peptidase 1;(source:Araport11)                                                                                                                                                                                                                                                                                                                                                                                                                                                                                                                                                                                                                                                                                                                           | 106.06  | 48.52  | 2.19 | 2.65E-04 | 1.18E-03 |
| 1556 | 3 | F2-3 vs. L2-3 | 253101_at | AT4G37430 | Encodes a member of the CYP81F cytochrome P450 monooxygenase subfamily.                                                                                                                                                                                                                                                                                                                                                                                                                                                                                                                                                                                                                                                                                               | 84.38   | 38.48  | 2.19 | 2.45E-05 | 2.17E-04 |
| 1557 | 3 | F2-3 vs. L2-3 | 249927_at | AT5G19220 | Encodes the large subunit of ADP-glucose pyrophosphorylase which catalyzes the first, rate limiting step in starch biosynthesis. The large subunit plays a regulatory role whereas the small subunit (ApS) is the catalytic isoform. Four isoforms (ApL1-4) have been identified. ApL1 is the major large subunit isoform present in leaves. Mutational analysis of APS1 suggests that APL1 and APL2 can compensate for loss of APS1 catalytic activity,suggesting both have catalytic as well as regulatory functions.                                                                                                                                                                                                                                               | 27.47   | 12.57  | 2.19 | 1.19E-04 | 6.64E-04 |
| 1558 | 3 | F2-3 vs. L2-3 | 247706_at | AT5G59480 | Haloacid dehalogenase-like hydrolase (HAD) superfamily protein;(source:Araport11)                                                                                                                                                                                                                                                                                                                                                                                                                                                                                                                                                                                                                                                                                     | 112.77  | 51.43  | 2.19 | 3.19E-05 | 2.61E-04 |
| 1559 | 3 | F2-3 vs. L2-3 | 262850_at | AT1G14920 | Similar to a putative transcription factor and transcriptional coactivators. Repressor of GA responses and involved in gibberellic acid mediated signaling. Member of the DELLA proteins that restrain the cell proliferation and expansion that drives plant growth. The protein undergoes degradation in response to GA via the 26S proteasome. GAI may be involved in reducing ROS accumulation in response to stress by up-regulating the transcription of superoxide dismutases. Represses GA-induced vegetative growth and floral initiation. Rapidly degraded in response to GA.                                                                                                                                                                               | 694.70  | 318.43 | 2.18 | 3.58E-05 | 2.83E-04 |
| 1560 | 3 | F2-3 vs. L2-3 | 264007_at | AT2G21140 | Proline-rich protein expressed in expanding leaves, stems, flowers, and siliques.                                                                                                                                                                                                                                                                                                                                                                                                                                                                                                                                                                                                                                                                                     | 104.29  | 47.76  | 2.18 | 1.80E-04 | 8.86E-04 |
| 1561 | 3 | F2-3 vs. L2-3 | 252192_at | AT3G50000 | Encodes the casein kinase II (CK2) catalytic subunit (alpha).                                                                                                                                                                                                                                                                                                                                                                                                                                                                                                                                                                                                                                                                                                         | 1100.57 | 506.68 | 2.17 | 3.92E-04 | 1.57E-03 |
| 1562 | 3 | F2-3 vs. L2-3 | 245333_at | AT4G14615 | sporulation-specific protein;(source:Araport11)<br>Encodes one of two LUNAPARK proteins in Arabidopsis. Both LNPA and LNPB are predominantly distributed throughout the ER, but not preferentially localized at the three-way junctions. Mutation of both LNPA and LNPB together caused the cortical ER to develop poor ER cisternae and a less dense tubular network.                                                                                                                                                                                                                                                                                                                                                                                                | 956.04  | 439.93 | 2.17 | 4.14E-04 | 1.63E-03 |
| 1563 | 3 | F2-3 vs. L2-3 | 253555_at | AT4G31080 | Mutant is defective in perception of Pseudomonas syringae avirulence gene avrPphB. Encodes a putative serine-threonine kinase.                                                                                                                                                                                                                                                                                                                                                                                                                                                                                                                                                                                                                                        | 99.45   | 45.77  | 2.17 | 3.94E-04 | 1.57E-03 |
| 1564 | 3 | F2-3 vs. L2-3 | 245986_at | AT5G13160 |                                                                                                                                                                                                                                                                                                                                                                                                                                                                                                                                                                                                                                                                                                                                                                       | 109.18  | 50.40  | 2.17 | 9.19E-04 | 3.00E-03 |
| 1565 | 3 | F2-3 vs. L2-3 | 260227_at | AT1G74450 | Plants overexpressing At1g74450 are stunted in height and have reduced male fertility.                                                                                                                                                                                                                                                                                                                                                                                                                                                                                                                                                                                                                                                                                | 165.87  | 76.95  | 2.16 | 7.13E-04 | 2.46E-03 |
| 1566 | 3 | F2-3 vs. L2-3 | 267019_at | AT2G39130 | Transmembrane amino acid transporter family protein;(source:Araport11)<br>Encodes one of the mitochondrial dicarboxylate carriers (DIC): DIC1 (AT2G22500), DIC2 (AT4G24570), DIC3 (AT5G09470). The mRNA is cell-to-cell mobile.                                                                                                                                                                                                                                                                                                                                                                                                                                                                                                                                       | 25.75   | 11.94  | 2.16 | 2.88E-04 | 1.25E-03 |
| 1567 | 3 | F2-3 vs. L2-3 | 254120_at | AT4G24570 | Late embryogenesis abundant protein;(source:Araport11)                                                                                                                                                                                                                                                                                                                                                                                                                                                                                                                                                                                                                                                                                                                | 123.87  | 57.26  | 2.16 | 1.35E-04 | 7.28E-04 |
| 1568 | 3 | F2-3 vs. L2-3 | 266581_at | AT2G46140 |                                                                                                                                                                                                                                                                                                                                                                                                                                                                                                                                                                                                                                                                                                                                                                       | 110.91  | 51.47  | 2.15 | 4.92E-04 | 1.85E-03 |
| 1569 | 3 | F2-3 vs. L2-3 | 257699_at | AT3G12780 | PGK1 was localized exclusively in the chloroplasts of photosynthetic tissues and is the photosynthetic isoform. The pgk1.1 knock-down mutant displayed reduced growth, lower photosynthetic capacity and starch content. Expression studies in PGK mutants showed that PGK1 and PGK3 were down-regulated in pgk3.2 and pgk1.1, respectively. These results indicate that the down-regulation of photosynthetic activity could be a plant strategy when glycolysis is impaired to achieve metabolic adjustment and optimize growth (DOI:10.1104/pp.17.01227).Functions redundantly with AT1G56190 in the chloroplast in the biosynthesis of thylakoid membrane galactolipids. Double mutants are photosynthetically incompetent, plants are albino and seedling lethal | 925.91  | 431.23 | 2.15 | 1.81E-04 | 8.86E-04 |
| 1570 | 3 | F2-3 vs. L2-3 | 251825_at | AT3G55100 | ABC-2 type transporter family protein;(source:Araport11)<br>vacuolar ATP synthase subunit D (VATD) / V-ATPase D subunit / vacuolar proton pump D subunit (VATPD);(source:Araport11)                                                                                                                                                                                                                                                                                                                                                                                                                                                                                                                                                                                   | 35.46   | 16.48  | 2.15 | 1.83E-05 | 1.81E-04 |
| 1571 | 3 | F2-3 vs. L2-3 | 251557_at | AT3G58730 |                                                                                                                                                                                                                                                                                                                                                                                                                                                                                                                                                                                                                                                                                                                                                                       | 137.96  | 64.21  | 2.15 | 1.14E-05 | 1.29E-04 |
| 1572 | 3 | F2-3 vs. L2-3 | 249271_at | AT5G41790 | CIP1 physically interacts specifically with the putative coiled-coil region of COP1 in vitro. In hypocotyl and cotyledon protoplasts, it is associated to the cytoskeleton, but not in the root. IN the root the protein is found around epidermal cells. Expression is induced by ABA and osmotic stress but is not regulated by light. Loss of function mutants are also sensitive to osmotic stress and are somewhat ABA insensitive. The mRNA is cell-to-cell mobile.                                                                                                                                                                                                                                                                                             | 28.86   | 13.44  | 2.15 | 7.09E-04 | 2.45E-03 |



|                                                                                                                                                                                                                                                                                                                                                                                |   |               |            |           |                                                                                                                                                                                                                                                                                                                                                                                                                                                             |         |         |      |          |          |
|--------------------------------------------------------------------------------------------------------------------------------------------------------------------------------------------------------------------------------------------------------------------------------------------------------------------------------------------------------------------------------|---|---------------|------------|-----------|-------------------------------------------------------------------------------------------------------------------------------------------------------------------------------------------------------------------------------------------------------------------------------------------------------------------------------------------------------------------------------------------------------------------------------------------------------------|---------|---------|------|----------|----------|
| 1573                                                                                                                                                                                                                                                                                                                                                                           | 3 | F2-3 vs. L2-3 | 247338_at  | AT5G63680 | Pyruvate kinase family protein;(source:Araport11)                                                                                                                                                                                                                                                                                                                                                                                                           | 112.83  | 52.44   | 2.15 | 6.65E-05 | 4.41E-04 |
| 1574                                                                                                                                                                                                                                                                                                                                                                           | 3 | F2-3 vs. L2-3 | 247240_at  | AT5G64660 | CYS, MET, PRO, and GLY protein 2;(source:Araport11)                                                                                                                                                                                                                                                                                                                                                                                                         | 40.73   | 18.97   | 2.15 | 6.82E-04 | 2.38E-03 |
| 1575                                                                                                                                                                                                                                                                                                                                                                           | 3 | F2-3 vs. L2-3 | 265183_at  | AT1G23750 | Nucleic acid-binding, OB-fold-like protein;(source:Araport11)                                                                                                                                                                                                                                                                                                                                                                                               | 152.54  | 71.40   | 2.14 | 2.71E-04 | 1.19E-03 |
| 1576                                                                                                                                                                                                                                                                                                                                                                           | 3 | F2-3 vs. L2-3 | 252973_s_a | AT4G38740 | Encodes cytosolic cyclophilin ROC1.                                                                                                                                                                                                                                                                                                                                                                                                                         | 744.96  | 347.97  | 2.14 | 4.95E-05 | 3.59E-04 |
| 1577                                                                                                                                                                                                                                                                                                                                                                           | 3 | F2-3 vs. L2-3 | 246673_at  | AT5G30510 | ribosomal protein S1;(source:Araport11)                                                                                                                                                                                                                                                                                                                                                                                                                     | 1803.55 | 840.82  | 2.14 | 2.00E-06 | 3.93E-05 |
| Encodes a thylakoid membrane protein with thioredoxin-like and beta-propeller domains located in the lumen and a haloacid-dehalogenase domain exposed to the chloroplast stroma. The protein Primes role may be to prevent formation of a slowly reversible form of antenna quenching, thereby maintaining the efficiency of light harvesting.The mRNA is cell-to-cell mobile. |   |               |            |           |                                                                                                                                                                                                                                                                                                                                                                                                                                                             | 99.15   | 46.58   | 2.13 | 3.08E-05 | 2.55E-04 |
| 1578                                                                                                                                                                                                                                                                                                                                                                           | 3 | F2-3 vs. L2-3 | 259603_at  | AT1G56500 | NAD(P)-binding Rossmann-fold superfamily protein;(source:Araport11)                                                                                                                                                                                                                                                                                                                                                                                         | 45.44   | 21.30   | 2.13 | 2.61E-05 | 2.27E-04 |
| 1579                                                                                                                                                                                                                                                                                                                                                                           | 3 | F2-3 vs. L2-3 | 266578_at  | AT2G23910 | jasmonate-zim-domain protein 7;(source:Araport11)                                                                                                                                                                                                                                                                                                                                                                                                           | 29.92   | 14.05   | 2.13 | 4.00E-07 | 1.25E-05 |
| 1580                                                                                                                                                                                                                                                                                                                                                                           | 3 | F2-3 vs. L2-3 | 266901_at  | AT2G34600 | cruciferin (DUF506);(source:Araport11)                                                                                                                                                                                                                                                                                                                                                                                                                      | 122.65  | 57.65   | 2.13 | 9.00E-07 | 2.22E-05 |
| 1581                                                                                                                                                                                                                                                                                                                                                                           | 3 | F2-3 vs. L2-3 | 267623_at  | AT2G39650 | Protein kinase superfamily protein, expressed in the peroxisome.                                                                                                                                                                                                                                                                                                                                                                                            | 89.75   | 42.17   | 2.13 | 3.77E-04 | 1.52E-03 |
| 1582                                                                                                                                                                                                                                                                                                                                                                           | 3 | F2-3 vs. L2-3 | 257090_at  | AT3G20530 | vacuolar H+-pumping ATPase 16 kDa proteolipid (ava-p1)                                                                                                                                                                                                                                                                                                                                                                                                      | 1450.20 | 679.48  | 2.13 | 2.87E-05 | 2.42E-04 |
| 1583                                                                                                                                                                                                                                                                                                                                                                           | 3 | F2-3 vs. L2-3 | 253200_at  | AT4G34720 | calcium exchanger 7;(source:Araport11)                                                                                                                                                                                                                                                                                                                                                                                                                      | 41.05   | 19.29   | 2.13 | 1.20E-04 | 6.65E-04 |
| 1584                                                                                                                                                                                                                                                                                                                                                                           | 3 | F2-3 vs. L2-3 | 250054_at  | AT5G17860 | CHCH domain protein;(source:Araport11) involved in mechanotransduction. Loss of both At12cys-1 and At12cys-2 lead to enhanced tolerance to drought and light stress and increased anti-oxidant capacity.                                                                                                                                                                                                                                                    | 3199.18 | 1504.90 | 2.13 | 5.52E-04 | 2.02E-03 |
| 1585                                                                                                                                                                                                                                                                                                                                                                           | 3 | F2-3 vs. L2-3 | 247285_at  | AT5G64400 | Encodes phosphatidylinositol-4-phosphate 5-kinase 6 (PIP5K6). Regulates clathrin-dependent endocytosis in pollen tubes.                                                                                                                                                                                                                                                                                                                                     | 37.85   | 17.86   | 2.12 | 9.44E-05 | 5.62E-04 |
| 1586                                                                                                                                                                                                                                                                                                                                                                           | 3 | F2-3 vs. L2-3 | 258690_at  | AT3G07960 | member of CYP77A                                                                                                                                                                                                                                                                                                                                                                                                                                            | 152.41  | 71.76   | 2.12 | 5.18E-04 | 1.93E-03 |
| 1587                                                                                                                                                                                                                                                                                                                                                                           | 3 | F2-3 vs. L2-3 | 258962_at  | AT3G10570 | AtRabD2c encodes a Rab GTPase, which plays important roles in pollen development, germination and tube elongation.                                                                                                                                                                                                                                                                                                                                          | 188.83  | 89.21   | 2.12 | 2.38E-04 | 1.08E-03 |
| 1588                                                                                                                                                                                                                                                                                                                                                                           | 3 | F2-3 vs. L2-3 | 245299_at  | AT4G17530 | Drug/metabolite transporter superfamily protein;(source:Araport11)                                                                                                                                                                                                                                                                                                                                                                                          | 579.53  | 272.92  | 2.12 | 2.00E-04 | 9.59E-04 |
| 1589                                                                                                                                                                                                                                                                                                                                                                           | 3 | F2-3 vs. L2-3 | 254657_s_a | AT4G18220 | Encodes a protein with ABA 8'-hydroxylase activity, involved in ABA catabolism. Member of the CYP707A gene family. CYP707A1 appears to play an important role in determining the ABA levels in dry seeds. Gene involved in postgermination growth. Overexpression of CYP707A1 leads to a decrease in ABA levels and a reduction in after-ripening period to break dormancy.                                                                                 | 44.73   | 21.06   | 2.12 | 2.65E-05 | 2.29E-04 |
| 1590                                                                                                                                                                                                                                                                                                                                                                           | 3 | F2-3 vs. L2-3 | 254562_at  | AT4G19230 | fiber (DUF1218);(source:Araport11)                                                                                                                                                                                                                                                                                                                                                                                                                          | 30.71   | 14.49   | 2.12 | 1.68E-04 | 8.46E-04 |
| 1591                                                                                                                                                                                                                                                                                                                                                                           | 3 | F2-3 vs. L2-3 | 253877_at  | AT4G27435 | magnesium transporter, putative (DUF803);(source:Araport11)                                                                                                                                                                                                                                                                                                                                                                                                 | 128.10  | 60.48   | 2.12 | 1.79E-04 | 8.84E-04 |
| 1592                                                                                                                                                                                                                                                                                                                                                                           | 3 | F2-3 vs. L2-3 | 250347_at  | AT5G11960 | Encodes a class XI myosin that is involved in organelle motility, actin organization, and optimal growth of pollen tubes.                                                                                                                                                                                                                                                                                                                                   | 39.61   | 18.74   | 2.11 | 7.34E-05 | 4.71E-04 |
| 1593                                                                                                                                                                                                                                                                                                                                                                           | 3 | F2-3 vs. L2-3 | 264235_at  | AT1G54560 | DNAse I-like superfamily protein;(source:Araport11)                                                                                                                                                                                                                                                                                                                                                                                                         | 43.07   | 20.40   | 2.11 | 6.31E-04 | 2.24E-03 |
| 1594                                                                                                                                                                                                                                                                                                                                                                           | 3 | F2-3 vs. L2-3 | 250803_at  | AT5G04980 | Transketolase family protein;(source:Araport11)                                                                                                                                                                                                                                                                                                                                                                                                             | 1065.50 | 505.28  | 2.11 | 7.40E-06 | 9.65E-05 |
| 1595                                                                                                                                                                                                                                                                                                                                                                           | 3 | F2-3 vs. L2-3 | 248474_at  | AT5G50850 | AtCPT7 synthesizes medium-chain polyprenols of approximately 55 carbons in length. The enzyme utilizes geranylgeranyl pyrophosphate (GGPP) and isopentenyl pyrophosphate (IPP) as substrates. The enzymatic product accumulates into plastidial membranes (DOI:10.1105/tpc.16.00796).                                                                                                                                                                       | 36.70   | 17.42   | 2.11 | 3.08E-04 | 1.32E-03 |
| 1596                                                                                                                                                                                                                                                                                                                                                                           | 3 | F2-3 vs. L2-3 | 247780_at  | AT5G58770 | Encodes one of the 36 carboxylate clamp (CC)-tetratricopeptide repeat (TPR) proteins (Prasad 2010, Pubmed ID: 20856808) with potential to interact with Hsp90/Hsp70 as co-chaperones.                                                                                                                                                                                                                                                                       | 255.16  | 121.58  | 2.10 | 1.90E-06 | 3.89E-05 |
| 1597                                                                                                                                                                                                                                                                                                                                                                           | 3 | F2-3 vs. L2-3 | 264609_at  | AT1G04530 | Fatty acid desaturase family protein;(source:Araport11)                                                                                                                                                                                                                                                                                                                                                                                                     | 72.15   | 34.36   | 2.10 | 1.70E-04 | 8.53E-04 |
| 1598                                                                                                                                                                                                                                                                                                                                                                           | 3 | F2-3 vs. L2-3 | 260950_s_a | AT1G06090 | proline-rich family protein;(source:Araport11)                                                                                                                                                                                                                                                                                                                                                                                                              | 59.24   | 28.23   | 2.10 | 3.65E-04 | 1.49E-03 |
| 1599                                                                                                                                                                                                                                                                                                                                                                           | 3 | F2-3 vs. L2-3 | 246582_at  | AT1G31750 | Encodes a protein that associates with lipid droplet surfaces and shares sequence homology with family of small rubber particle proteins. Plays dual roles as positive factors for tissue growth and development and in drought stress responses. The mRNA is cell-to-cell mobile.                                                                                                                                                                          | 258.89  | 123.27  | 2.10 | 1.59E-04 | 8.16E-04 |
| 1600                                                                                                                                                                                                                                                                                                                                                                           | 3 | F2-3 vs. L2-3 | 259105_at  | AT3G05500 | Encodes a peroxisomal protein involved in the activation of fatty acids through esterification with CoA. At5g63380 preferentially activates fatty acids with increased chain length (C9:0 to C8:0) and thus shares characteristics with long-chain fatty acyl-CoA synthases. Also able to catalyze the conversion of OPDA to its CoA ester and is therefore thought to be involved in the peroxisomal &#946;-oxidation steps of jasmonic acid biosynthesis. | 473.40  | 225.80  | 2.10 | 3.30E-06 | 5.45E-05 |
| 1601                                                                                                                                                                                                                                                                                                                                                                           | 3 | F2-3 vs. L2-3 | 247380_at  | AT5G63380 | ferredoxin 1;(source:Araport11)                                                                                                                                                                                                                                                                                                                                                                                                                             | 1127.02 | 540.41  | 2.09 | 3.15E-04 | 1.33E-03 |
| 1602                                                                                                                                                                                                                                                                                                                                                                           | 3 | F2-3 vs. L2-3 | 260481_at  | AT1G10960 | NADH dehydrogenase ubiquinone 1 alpha subcomplex subunit;(source:Araport11)                                                                                                                                                                                                                                                                                                                                                                                 | 1415.84 | 676.14  | 2.09 | 4.99E-04 | 1.87E-03 |
| 1603                                                                                                                                                                                                                                                                                                                                                                           | 3 | F2-3 vs. L2-3 | 258681_at  | AT3G08610 |                                                                                                                                                                                                                                                                                                                                                                                                                                                             |         |         |      |          |          |

|      |   |               |           |           |                                                                                                                                                                                                                                                                                                                                                                                                                                                                                                                                           |        |        |      |          |          |
|------|---|---------------|-----------|-----------|-------------------------------------------------------------------------------------------------------------------------------------------------------------------------------------------------------------------------------------------------------------------------------------------------------------------------------------------------------------------------------------------------------------------------------------------------------------------------------------------------------------------------------------------|--------|--------|------|----------|----------|
| 1604 | 3 | F2-3 vs. L2-3 | 252933_at | AT4G39110 | bups1 and bups1/2 double mutants have reduced fertility due to premature rupture of pollen tubes before they reach the ovule. BUSP1 interacts with RALF4/19 peptide ligands and ANX1/2 receptors. BUPS/ANX signaling may regulate and promote pollen tube growth.                                                                                                                                                                                                                                                                         | 51.62  | 24.71  | 2.09 | 4.22E-05 | 3.22E-04 |
| 1605 | 3 | F2-3 vs. L2-3 | 256093_at | AT1G20823 | Encodes a RING E3 ubiquitin ligase ATL80. Involved in phosphate mobilization and cold stress response in sufficient phosphate growth conditions. The mRNA is cell-to-cell mobile.                                                                                                                                                                                                                                                                                                                                                         | 39.78  | 19.14  | 2.08 | 5.69E-04 | 2.07E-03 |
| 1606 | 3 | F2-3 vs. L2-3 | 245756_at | AT1G35190 | 2-oxoglutarate (2OG) and Fe(II)-dependent oxygenase superfamily protein;(source:Araport11)                                                                                                                                                                                                                                                                                                                                                                                                                                                | 67.71  | 32.58  | 2.08 | 2.74E-04 | 1.21E-03 |
| 1607 | 3 | F2-3 vs. L2-3 | 262022_at | AT1G35490 | bZIP family transcription factor;(source:Araport11)                                                                                                                                                                                                                                                                                                                                                                                                                                                                                       | 24.16  | 11.59  | 2.08 | 1.08E-04 | 6.22E-04 |
| 1608 | 3 | F2-3 vs. L2-3 | 263134_at | AT1G78570 | Encodes a UDP-L-Rhamnose synthase involved in the biosynthesis of rhamnose, a major monosaccharide component of pectin. Catalyzes the conversion of UDP-D-Glc to UDP-L-Rha. The dehydrogenase domain of RHM1 was shown to catalyze the conversion of UDP-D-Glc to the reaction intermediate UDP-4-keto-6-deoxy-D-Glc using recombinant protein assay but the activity of the full-length protein was not determined as it could not be expressed in <i>E. coli</i> .                                                                      | 239.24 | 115.24 | 2.08 | 6.66E-04 | 2.33E-03 |
| 1609 | 3 | F2-3 vs. L2-3 | 264102_at | AT1G79270 | evolutionarily conserved C-terminal region 8;(source:Araport11)                                                                                                                                                                                                                                                                                                                                                                                                                                                                           | 22.76  | 10.93  | 2.08 | 1.57E-05 | 1.63E-04 |
| 1610 | 3 | F2-3 vs. L2-3 | 263985_at | AT2G42750 | DNAJ heat shock N-terminal domain-containing protein;(source:Araport11)                                                                                                                                                                                                                                                                                                                                                                                                                                                                   | 434.31 | 208.56 | 2.08 | 2.92E-04 | 1.26E-03 |
| 1611 | 3 | F2-3 vs. L2-3 | 266719_at | AT2G46830 | Encodes a transcriptional repressor that performs overlapping functions with LHY in a regulatory feedback loop that is closely associated with the circadian oscillator of Arabidopsis. Binds to the evening element in the promoter of TOC1 and represses TOC1 transcription. CCA1 and LHY colocalize in the nucleus and form heterodimers in vivo. CCA1 and LHY function synergistically in regulating circadian rhythms of Arabidopsis. CCA1 binds the GI promoter.                                                                    | 87.45  | 42.14  | 2.08 | 3.52E-04 | 1.45E-03 |
| 1612 | 3 | F2-3 vs. L2-3 | 257609_at | AT3G13845 | transmembrane protein;(source:Araport11)                                                                                                                                                                                                                                                                                                                                                                                                                                                                                                  | 207.55 | 99.55  | 2.08 | 4.04E-04 | 1.60E-03 |
| 1613 | 3 | F2-3 vs. L2-3 | 250854_at | AT5G04710 | Plastid localized metalloaminopeptidase.                                                                                                                                                                                                                                                                                                                                                                                                                                                                                                  | 91.73  | 44.20  | 2.08 | 4.15E-04 | 1.63E-03 |
| 1614 | 3 | F2-3 vs. L2-3 | 247150_at | AT5G65650 | sugar transporter, putative (DUF1195);(source:Araport11)                                                                                                                                                                                                                                                                                                                                                                                                                                                                                  | 67.34  | 32.44  | 2.08 | 7.01E-04 | 2.43E-03 |
| 1615 | 3 | F2-3 vs. L2-3 | 261226_at | AT1G20190 | member of Alpha-Expansin Gene Family. Naming convention from the Expansin Working Group (Kende et al, 2004. Plant Mol Bio)                                                                                                                                                                                                                                                                                                                                                                                                                | 42.33  | 20.43  | 2.07 | 1.13E-04 | 6.40E-04 |
| 1616 | 3 | F2-3 vs. L2-3 | 265761_at | AT2G01330 | nucleotide binding protein;(source:Araport11)                                                                                                                                                                                                                                                                                                                                                                                                                                                                                             | 61.28  | 29.58  | 2.07 | 2.46E-05 | 2.17E-04 |
| 1617 | 3 | F2-3 vs. L2-3 | 245060_at | AT2G39770 | Encodes a GDP-mannose pyrophosphorylase/ mannose-1-pyrophosphatase. This enzyme provides GDP-mannose, which is used for cell wall carbohydrate biosynthesis and protein glycosylation as well as for ascorbate (vitamin C) biosynthesis. Mutations in this gene confer hypersensitivity to NH4+.                                                                                                                                                                                                                                          | 315.42 | 152.17 | 2.07 | 1.06E-05 | 1.22E-04 |
| 1618 | 3 | F2-3 vs. L2-3 | 259338_at | AT3G03800 | member of SYP13 Gene Family                                                                                                                                                                                                                                                                                                                                                                                                                                                                                                               | 36.58  | 17.69  | 2.07 | 4.60E-04 | 1.76E-03 |
| 1619 | 3 | F2-3 vs. L2-3 | 247816_at | AT5G58260 | Encodes subunit NDH-N of NAD(P)H:plastoquinone dehydrogenase complex (Ndh complex) present in the thylakoid membrane of chloroplasts. This subunit is thought to be required for Ndh complex assembly.                                                                                                                                                                                                                                                                                                                                    | 86.05  | 41.58  | 2.07 | 2.55E-05 | 2.24E-04 |
| 1620 | 3 | F2-3 vs. L2-3 | 245138_at | AT2G45190 | Encodes a member of the YABBY family of transcriptional regulators that is involved in abaxial cell type specification in leaves and fruits. YAB1 acts in a non-cell autonomous fashion within the meristem to affect phyllotactic patterning. The non-autonomous effect on the central region of the meristem is mediated through the activity of Lateral Suppressor (LAS).                                                                                                                                                              | 43.86  | 21.27  | 2.06 | 1.08E-04 | 6.22E-04 |
| 1621 | 3 | F2-3 vs. L2-3 | 258682_at | AT3G08720 | Encodes a ribosomal-protein S6 kinase. Gene expression is induced by cold and salt (NaCl). Activation of AtS6k is regulated by 1-naphthylacetic acid and kinetin, at least in part, via a lipid kinase-dependent pathway. Phosphorylates specifically mammalian and plant S6 at 25 degrees C but not at 37 degrees C. Involved in translational up-regulation of ribosomal proteins.                                                                                                                                                      | 92.47  | 44.82  | 2.06 | 4.07E-04 | 1.61E-03 |
| 1622 | 3 | F2-3 vs. L2-3 | 257807_at | AT3G26650 | Encodes one of the two subunits forming the photosynthetic glyceraldehyde-3-phosphate dehydrogenase (GAPDH) and as such a constituent of the supramolecular complex with phosphoribulokinase (PRK) thought to be linked by a small peptide encoded by CP12-2. GapA-1 is coordinately expressed by light with PRK and CP12-2. The enzyme activity, tested in leaf protein extracts dropped significantly after external sucrose treatment for the photosynthetic GAPDH (NADPH-dependent) but not for the cytosolic GAPDH (NADH-dependent). | 708.76 | 344.14 | 2.06 | 7.68E-05 | 4.86E-04 |
| 1623 | 3 | F2-3 vs. L2-3 | 252016_at | AT3G52950 | CBS / octicosapeptide/Phox/Bemp1 (PB1) domains-containing protein;(source:Araport11)                                                                                                                                                                                                                                                                                                                                                                                                                                                      | 159.05 | 77.29  | 2.06 | 1.70E-05 | 1.73E-04 |

|      |   |               |           |           |                                                                                                                                                                                                                                                                                                                                                                                                                                                                                                                                                                                         |         |        |      |          |          |
|------|---|---------------|-----------|-----------|-----------------------------------------------------------------------------------------------------------------------------------------------------------------------------------------------------------------------------------------------------------------------------------------------------------------------------------------------------------------------------------------------------------------------------------------------------------------------------------------------------------------------------------------------------------------------------------------|---------|--------|------|----------|----------|
| 1624 | 3 | F2-3 vs. L2-3 | 253039_at | AT4G37760 | squalene epoxidase 3;(source:Araport11)                                                                                                                                                                                                                                                                                                                                                                                                                                                                                                                                                 | 109.57  | 53.13  | 2.06 | 3.15E-04 | 1.33E-03 |
| 1625 | 3 | F2-3 vs. L2-3 | 252896_at | AT4G39480 | member of CYP96A                                                                                                                                                                                                                                                                                                                                                                                                                                                                                                                                                                        | 49.39   | 23.95  | 2.06 | 5.96E-04 | 2.14E-03 |
| 1626 | 3 | F2-3 vs. L2-3 | 260968_at | AT1G12250 | Pentapeptide repeat-containing protein;(source:Araport11)<br>WD40 nucleoplasmic shuttling protein that positively regulates the Absciscic acid (ABA) response by interacting with and maintaining the stability of ABI5 in the nucleus. Nuclear export of XIW1 is XPO1-dependent. Involved in regulating seed germination, primary root growth, and drought stress resistance.                                                                                                                                                                                                          | 135.20  | 65.79  | 2.05 | 2.29E-04 | 1.06E-03 |
| 1627 | 3 | F2-3 vs. L2-3 | 262597_at | AT1G15470 | Encodes a putative nucleotide-diphospho-sugar transferase required for pollen germination and tube growth.                                                                                                                                                                                                                                                                                                                                                                                                                                                                              | 46.09   | 22.49  | 2.05 | 6.60E-05 | 4.38E-04 |
| 1628 | 3 | F2-3 vs. L2-3 | 262868_at | AT1G64980 |                                                                                                                                                                                                                                                                                                                                                                                                                                                                                                                                                                                         | 295.75  | 144.46 | 2.05 | 3.39E-05 | 2.72E-04 |
| 1629 | 3 | F2-3 vs. L2-3 | 260800_at | AT1G78240 | Encodes TSD2 (TUMOROUS SHOOT DEVELOPMENT2), a putative methyltransferase with an essential role in cell adhesion and coordinated plant development.                                                                                                                                                                                                                                                                                                                                                                                                                                     | 728.19  | 355.08 | 2.05 | 6.67E-05 | 4.42E-04 |
| 1630 | 3 | F2-3 vs. L2-3 | 258038_at | AT3G21260 | Glycolipid transfer protein (GLTP) family protein;(source:Araport11)                                                                                                                                                                                                                                                                                                                                                                                                                                                                                                                    | 24.10   | 11.77  | 2.05 | 3.39E-05 | 2.72E-04 |
| 1631 | 3 | F2-3 vs. L2-3 | 258452_at | AT3G22370 | Encodes AOX1a, an isoform of alternative oxidase that is expressed in rosettes, flowers, and root. The alternative oxidase of plant mitochondria transfers electrons from the ubiquinone pool to oxygen without energy conservations. It is regulated through transcriptional control and by pyruvate. Plays a role in shoot acclimation to low temperature. Also is capable of ameliorating reactive oxygen species production when the cytochrome pathway is inhibited. AOX1a also functions as a marker for mitochondrial retrograde response. The mRNA is cell-to-cell mobile.      | 120.68  | 58.84  | 2.05 | 6.57E-05 | 4.38E-04 |
| 1632 | 3 | F2-3 vs. L2-3 | 251197_at | AT3G62960 | Encodes a member of the CC-type glutaredoxin (ROXY) family that has been shown to interact with the transcription factor TGA2.                                                                                                                                                                                                                                                                                                                                                                                                                                                          | 39.08   | 19.05  | 2.05 | 5.71E-04 | 2.07E-03 |
| 1633 | 3 | F2-3 vs. L2-3 | 261178_at | AT1G04760 | member of Synaptobrevin -like protein family                                                                                                                                                                                                                                                                                                                                                                                                                                                                                                                                            | 46.21   | 22.68  | 2.04 | 1.52E-04 | 7.91E-04 |
| 1634 | 3 | F2-3 vs. L2-3 | 266653_at | AT2G25740 | ATP-dependent protease La (LON) domain protein;(source:Araport11)                                                                                                                                                                                                                                                                                                                                                                                                                                                                                                                       | 101.92  | 49.91  | 2.04 | 3.86E-04 | 1.55E-03 |
| 1635 | 3 | F2-3 vs. L2-3 | 258181_at | AT3G21670 | Major facilitator superfamily protein;(source:Araport11)                                                                                                                                                                                                                                                                                                                                                                                                                                                                                                                                | 66.36   | 32.49  | 2.04 | 3.88E-04 | 1.55E-03 |
| 1636 | 3 | F2-3 vs. L2-3 | 252327_at | AT3G48740 | Encodes a member of the SWEET sucrose efflux transporter family proteins.<br>Encodes an unusual palmitate desaturase that is highly substrate specific. It introduces a delta-3 trans double bond at palmitate at the sn-2 position of phosphatidylglycerol. The mRNA is cell-to-cell mobile.                                                                                                                                                                                                                                                                                           | 148.81  | 72.97  | 2.04 | 6.73E-04 | 2.35E-03 |
| 1637 | 3 | F2-3 vs. L2-3 | 253943_at | AT4G27030 | encodes a gene similar to cellulose synthase                                                                                                                                                                                                                                                                                                                                                                                                                                                                                                                                            | 32.30   | 15.81  | 2.04 | 1.30E-06 | 3.01E-05 |
| 1638 | 3 | F2-3 vs. L2-3 | 253533_at | AT4G31590 | Encodes the only subunit of photosystem I located entirely in the thylakoid lumen. May be involved in the interaction between plastocyanin and the photosystem I complex. Phosphorylation of this protein is dependent on calcium.                                                                                                                                                                                                                                                                                                                                                      | 182.99  | 89.66  | 2.04 | 3.60E-04 | 1.47E-03 |
| 1639 | 3 | F2-3 vs. L2-3 | 247320_at | AT5G64040 | member of Putative Na+/H+ antiporter family                                                                                                                                                                                                                                                                                                                                                                                                                                                                                                                                             | 1683.49 | 825.42 | 2.04 | 8.22E-04 | 2.75E-03 |
| 1640 | 3 | F2-3 vs. L2-3 | 258408_at | AT3G17630 | Encodes a cytochrome p450 monooxygenase. Overexpression of this gene allows fruit growth independently of fertilization. The gene is normally expressed only in floral organs(during the Arabidopsis stage 14 flower) and in the funiculus at anthesis.                                                                                                                                                                                                                                                                                                                                 | 28.53   | 14.08  | 2.03 | 4.57E-05 | 3.40E-04 |
| 1641 | 3 | F2-3 vs. L2-3 | 251301_at | AT3G61880 | HCF244 is a member of the atypical short-chain dehydrogenase/reductase superfamily, a modified group, which has lost enzyme activity.HCF244 interacts with unknown partners in a 200-400 kD membrane associated complex.                                                                                                                                                                                                                                                                                                                                                                | 55.15   | 27.12  | 2.03 | 4.80E-05 | 3.52E-04 |
| 1642 | 3 | F2-3 vs. L2-3 | 253197_at | AT4G35250 | Encodes HCF173, a protein with weak similarities to the superfamily of the short-chain dehydrogenases/reductases. HCF173 is involved in the initiation of translation of the psbA mRNA and binds a specific site in the 5' UTR of psbA mRNA. . Mutants shows a high chlorophyll fluorescence phenotype (hcf) and are severely affected in the accumulation of PSII subunits. The protein HCF173 is localized in the chloroplast, where it is mainly associated with the membrane system and is part of a higher molecular weight complex with psbA mRNA as a component of this complex. | 404.42  | 198.99 | 2.03 | 7.31E-04 | 2.51E-03 |
| 1643 | 3 | F2-3 vs. L2-3 | 255764_at | AT1G16720 |                                                                                                                                                                                                                                                                                                                                                                                                                                                                                                                                                                                         | 397.21  | 196.20 | 2.02 | 9.20E-04 | 3.00E-03 |
| 1644 | 3 | F2-3 vs. L2-3 | 264280_at | AT1G61820 | beta glucosidase 46;(source:Araport11)                                                                                                                                                                                                                                                                                                                                                                                                                                                                                                                                                  | 24.42   | 12.11  | 2.02 | 4.51E-04 | 1.73E-03 |
| 1645 | 3 | F2-3 vs. L2-3 | 245148_at | AT2G45220 | Plant invertase/pectin methylesterase inhibitor superfamily;(source:Araport11)                                                                                                                                                                                                                                                                                                                                                                                                                                                                                                          | 61.54   | 30.44  | 2.02 | 9.04E-04 | 2.97E-03 |
| 1646 | 3 | F2-3 vs. L2-3 | 257194_at | AT3G13110 | Encodes a mitochondrial serine O-acetyltransferase involved in sulfur assimilation and cysteine biosynthesis. Expressed in the vascular system.                                                                                                                                                                                                                                                                                                                                                                                                                                         | 138.85  | 68.90  | 2.02 | 6.50E-06 | 8.82E-05 |
| 1647 | 3 | F2-3 vs. L2-3 | 253567_at | AT4G31230 | kinase with adenine nucleotide alpha hydrolases-like domain-containing protein;(source:Araport11)                                                                                                                                                                                                                                                                                                                                                                                                                                                                                       | 27.85   | 13.78  | 2.02 | 1.38E-05 | 1.50E-04 |
| 1648 | 3 | F2-3 vs. L2-3 | 246230_at | AT4G36710 | GRAS family transcription factor;(source:Araport11)<br>Encodes FK506-binding protein 12 (FKBP12 or FKP12). FKP12 overexpression dramatically enhances rapamycin sensitivity, whereas rapamycin inhibition is relieved in transgenic plants deficient in FKP12.                                                                                                                                                                                                                                                                                                                          | 46.11   | 22.86  | 2.02 | 1.06E-04 | 6.14E-04 |
| 1649 | 3 | F2-3 vs. L2-3 | 247281_at | AT5G64350 |                                                                                                                                                                                                                                                                                                                                                                                                                                                                                                                                                                                         | 925.46  | 457.97 | 2.02 | 9.02E-04 | 2.97E-03 |

|      |   |               |            |           |                                                                                                                                                                                                                                                                                                                                                                                                                                                                                                                                                                                                 |        |        |      |          |          |
|------|---|---------------|------------|-----------|-------------------------------------------------------------------------------------------------------------------------------------------------------------------------------------------------------------------------------------------------------------------------------------------------------------------------------------------------------------------------------------------------------------------------------------------------------------------------------------------------------------------------------------------------------------------------------------------------|--------|--------|------|----------|----------|
|      |   |               | 256475_s_a |           |                                                                                                                                                                                                                                                                                                                                                                                                                                                                                                                                                                                                 |        |        |      |          |          |
| 1650 | 3 | F2-3 vs. L2-3 | t          | AT1G42680 | P-loop containing nucleoside triphosphate hydrolases superfamily protein;(source:Araport11)                                                                                                                                                                                                                                                                                                                                                                                                                                                                                                     | 23.19  | 11.56  | 2.01 | 2.88E-04 | 1.25E-03 |
| 1651 | 3 | F2-3 vs. L2-3 | 261875_at  | AT1G50610 | Leucine-rich repeat protein kinase family protein;(source:Araport11)                                                                                                                                                                                                                                                                                                                                                                                                                                                                                                                            | 31.24  | 15.53  | 2.01 | 1.08E-04 | 6.23E-04 |
| 1652 | 3 | F2-3 vs. L2-3 | 259856_at  | AT1G68440 | Transmembrane protein;(source:Araport11). Expression induced by abiotic stressors such as ABA, drought, heat, light, NaCl, osmotic stress and wounding. A member of ARF GTPase family. A thaliana has 21 members of this family, known to be essential for vesicle coating and uncoating and functions in GTP-binding. Gene encoding ADP-ribosylation factor and similar to ADP-ribosylation factor (Gl:861205) (Chlamydomonas reinhardtii), other ARFs and ARF-like proteins.                                                                                                                  | 83.74  | 41.61  | 2.01 | 6.21E-05 | 4.24E-04 |
| 1653 | 3 | F2-3 vs. L2-3 | 263297_at  | AT2G15310 | alternative NAD(P)H dehydrogenase 2;(source:Araport11)                                                                                                                                                                                                                                                                                                                                                                                                                                                                                                                                          | 33.73  | 16.75  | 2.01 | 2.05E-05 | 1.92E-04 |
| 1654 | 3 | F2-3 vs. L2-3 | 266835_at  | AT2G29990 | Major facilitator superfamily protein;(source:Araport11)                                                                                                                                                                                                                                                                                                                                                                                                                                                                                                                                        | 35.81  | 17.86  | 2.01 | 1.03E-04 | 6.00E-04 |
| 1655 | 3 | F2-3 vs. L2-3 | 266993_at  | AT2G39210 | Encodes a member of the monodehydroascorbate reductase gene family. Critical for a mutualistic symbiosis between the host Arabidopsis and the root colonizing fungus Piriformospora indica.                                                                                                                                                                                                                                                                                                                                                                                                     | 77.77  | 38.78  | 2.01 | 2.80E-05 | 2.39E-04 |
| 1656 | 3 | F2-3 vs. L2-3 | 258941_at  | AT3G09940 | BHP1 is a Raf-like protein kinase involved in mediating blue light dependent stomatal opening.                                                                                                                                                                                                                                                                                                                                                                                                                                                                                                  | 40.80  | 20.33  | 2.01 | 7.70E-06 | 9.97E-05 |
| 1657 | 3 | F2-3 vs. L2-3 | 254605_at  | AT4G18950 | phosphoribulokinase;(source:Araport11)                                                                                                                                                                                                                                                                                                                                                                                                                                                                                                                                                          | 145.26 | 72.29  | 2.01 | 9.30E-06 | 1.13E-04 |
| 1658 | 3 | F2-3 vs. L2-3 | 255720_at  | AT1G32060 | sucrose-phosphatase 1;(source:Araport11)                                                                                                                                                                                                                                                                                                                                                                                                                                                                                                                                                        | 81.99  | 41.02  | 2.00 | 3.44E-04 | 1.43E-03 |
| 1659 | 3 | F2-3 vs. L2-3 | 260517_at  | AT1G51420 | HXXXD-type acyl-transferase family protein;(source:Araport11)                                                                                                                                                                                                                                                                                                                                                                                                                                                                                                                                   | 41.74  | 20.88  | 2.00 | 2.71E-05 | 2.33E-04 |
| 1660 | 3 | F2-3 vs. L2-3 | 263382_at  | AT2G40230 | Encodes a subunit of the mitochondrial pyruvate dehydrogenase complex.                                                                                                                                                                                                                                                                                                                                                                                                                                                                                                                          | 70.98  | 35.47  | 2.00 | 1.99E-04 | 9.54E-04 |
| 1661 | 3 | F2-3 vs. L2-3 | 258208_at  | AT3G13930 | Encodes a member of the casein kinase 1 protein family that is expressed in punctate particles at the cell periphery suggesting possible plasmodesmatal localization (member of CKL-B group).                                                                                                                                                                                                                                                                                                                                                                                                   | 186.93 | 93.63  | 2.00 | 9.30E-06 | 1.13E-04 |
| 1662 | 3 | F2-3 vs. L2-3 | 253995_at  | AT4G26100 | member of Putative Na+/H+ antiporter family                                                                                                                                                                                                                                                                                                                                                                                                                                                                                                                                                     | 142.37 | 71.06  | 2.00 | 3.14E-05 | 2.59E-04 |
| 1663 | 3 | F2-3 vs. L2-3 | 251102_at  | AT5G01690 | Encodes a serine/threonine protein kinase.                                                                                                                                                                                                                                                                                                                                                                                                                                                                                                                                                      | 58.43  | 29.20  | 2.00 | 2.49E-04 | 1.12E-03 |
| 1664 | 3 | F2-3 vs. L2-3 | 250545_at  | AT5G08160 | Encodes an auxin glycosyltransferase that is likely to be involved in regulation of auxin by glycosylation.                                                                                                                                                                                                                                                                                                                                                                                                                                                                                     | 332.94 | 166.60 | 2.00 | 1.80E-06 | 3.80E-05 |
| 1665 | 3 | F2-3 vs. L2-3 | 263473_at  | AT2G31750 | Encodes a protein similar to the antifungal chitin-binding protein hevein from rubber tree latex. mRNA levels increase in response to ethylene and turnip crinkle virus infection. The mRNA is cell-to-cell mobile.                                                                                                                                                                                                                                                                                                                                                                             | 33.73  | 16.91  | 1.99 | 1.86E-05 | 1.83E-04 |
| 1666 | 3 | F2-3 vs. L2-3 | 258791_at  | AT3G04720 | citrate synthase 5;(source:Araport11)                                                                                                                                                                                                                                                                                                                                                                                                                                                                                                                                                           | 150.05 | 75.32  | 1.99 | 2.59E-04 | 1.16E-03 |
| 1667 | 3 | F2-3 vs. L2-3 | 251455_at  | AT3G60100 | Uncharacterized protein family (UPF0497);(source:Araport11)                                                                                                                                                                                                                                                                                                                                                                                                                                                                                                                                     | 39.76  | 19.94  | 1.99 | 1.90E-06 | 3.89E-05 |
| 1668 | 3 | F2-3 vs. L2-3 | 245304_at  | AT4G15630 | Encodes a transcriptional activator that regulates the expression of genes by binding to their GCG- or E-boxes to mediate physiological responses, including proline biosynthesis and ROS scavenging pathways, to enhance stress tolerance.                                                                                                                                                                                                                                                                                                                                                     | 233.90 | 117.59 | 1.99 | 1.02E-04 | 5.96E-04 |
| 1669 | 3 | F2-3 vs. L2-3 | 265034_at  | AT1G61660 | xyloglucan xylosyltransferase 5;(source:Araport11)                                                                                                                                                                                                                                                                                                                                                                                                                                                                                                                                              | 39.41  | 19.95  | 1.98 | 2.64E-04 | 1.17E-03 |
| 1670 | 3 | F2-3 vs. L2-3 | 260222_at  | AT1G74380 | Encodes a chloroplast-localized protein that modulates cytoplasmic Ca2+ concentration and is crucial for proper stomatal regulation in response to elevations of external Ca2+. Phosphorylation of this protein is dependent on calcium.                                                                                                                                                                                                                                                                                                                                                        | 127.40 | 64.23  | 1.98 | 1.87E-05 | 1.83E-04 |
| 1671 | 3 | F2-3 vs. L2-3 | 249876_at  | AT5G23060 | Encodes a protein with similarity to RCD1 but without the WWE domain. The protein does have a PARP signature upstream of the C-terminal protein interaction domain. The PARP signature may bind NAD+ and attach the ADP-ribose-moiety from NAD+ to the target molecule. Its presence suggests a role for the protein in ADP ribosylation. Up-regulated by NaCl. SRO5 and P5CDH (an overlapping gene in the antisense orientation) generate 24-nt and 21-nt siRNAs, which together are components of a regulatory loop controlling reactive oxygen species (ROS) production and stress response. | 141.63 | 71.77  | 1.97 | 3.68E-05 | 2.89E-04 |
| 1672 | 3 | F2-3 vs. L2-3 | 247431_at  | AT5G62520 | Expression of the CER1 gene associated with production of stem epicuticular wax and pollen fertility. Biochemical studies showed that cer1 mutants are blocked in the conversion of stem wax C30 aldehydes to C29 alkanes, and they also lack the secondary alcohols and ketones. These suggested the CER1 protein is an aldehyde decarbonylase, but the exact molecular function of this protein remains to be determined.                                                                                                                                                                     | 44.79  | 22.79  | 1.97 | 2.09E-05 | 1.95E-04 |
| 1673 | 3 | F2-3 vs. L2-3 | 264146_at  | AT1G02205 |                                                                                                                                                                                                                                                                                                                                                                                                                                                                                                                                                                                                 | 167.90 | 85.83  | 1.96 | 4.51E-04 | 1.73E-03 |

|      |   |               |            |           |                                                                                                                                                                                                                                                                                                                                                                                                                                                                     |         |        |      |          |          |
|------|---|---------------|------------|-----------|---------------------------------------------------------------------------------------------------------------------------------------------------------------------------------------------------------------------------------------------------------------------------------------------------------------------------------------------------------------------------------------------------------------------------------------------------------------------|---------|--------|------|----------|----------|
|      |   |               |            |           | ATP binding cassette transporter. Localized to the plasma membrane in uninfected cells. In infected leaves, the protein concentrated at infection sites. Contributes to nonhost resistance to inappropriate pathogens that enter by direct penetration in a salicylic acid?dependent manner. Required for mlo resistance. Has Cd transporter activity (Cd2+ extrusion pump) and contributes to heavy metal resistance. The mRNA is cell-to-cell mobile.             | 29.93   | 15.30  | 1.96 | 5.50E-05 | 3.89E-04 |
| 1674 | 3 | F2-3 vs. L2-3 | 262899_at  | AT1G59870 | encodes a member of SNF1-related protein kinase (SnRK2) family whose activity is activated by ionic (salt) and non-ionic (mannitol) osmotic stress and dehydration.                                                                                                                                                                                                                                                                                                 | 38.50   | 19.61  | 1.96 | 3.39E-05 | 2.72E-04 |
| 1675 | 3 | F2-3 vs. L2-3 | 260774_at  | AT1G78290 |                                                                                                                                                                                                                                                                                                                                                                                                                                                                     |         |        |      |          |          |
| 1676 | 3 | F2-3 vs. L2-3 | 259237_at  | AT3G11630 | Encodes a 2-Cys peroxiredoxin (2-Cys PrxA) that contains two catalytic Cys residues. Functions in redox cascade with TrxL2 via the ferredoxin-thioredoxin reductase (FTR)/thioredoxin (Trx) pathway to mediate the light-responsive reductive control of target proteins. Continuously transfers reducing power from TrxL2 to H2O2.                                                                                                                                 | 640.35  | 327.36 | 1.96 | 6.29E-05 | 4.26E-04 |
| 1677 | 3 | F2-3 vs. L2-3 | 250307_at  | AT5G12170 | Encodes one of the CRT-Like transporters (CLT1/AT5G19380, CLT2/AT4G24460, CLT3/AT5G12170). Required for glutathione homeostasis and stress responses. Mutants lacking these transporters are heavy metal-sensitive, glutathione(GSH)-deficient, and hypersensitive to Phytophthora infection. The mRNA is cell-to-cell mobile.                                                                                                                                      | 29.35   | 14.94  | 1.96 | 2.05E-04 | 9.75E-04 |
| 1678 | 3 | F2-3 vs. L2-3 | 248164_at  | AT5G54490 | Encodes a PINOID (PID)-binding protein containing putative EF-hand calcium-binding motifs. The interaction is dependent on the presence of calcium. mRNA expression is up-regulated by auxin. Not a phosphorylation target of PID, likely acts upstream of PID to regulate the activity of this protein in response to changes in calcium levels.                                                                                                                   | 96.02   | 49.03  | 1.96 | 8.54E-05 | 5.27E-04 |
| 1679 | 3 | F2-3 vs. L2-3 | 259363_at  | AT1G13270 | Encodes a methionine aminopeptidase formerly called MAP1B, renamed to MAP1C.                                                                                                                                                                                                                                                                                                                                                                                        | 519.97  | 267.01 | 1.95 | 1.71E-05 | 1.74E-04 |
| 1680 | 3 | F2-3 vs. L2-3 | 267607_s_a | AT2G26740 | Encodes a soluble epoxide hydrolase whose expression is induced by auxin and water stress.                                                                                                                                                                                                                                                                                                                                                                          | 330.89  | 169.68 | 1.95 | 2.30E-04 | 1.06E-03 |
| 1681 | 3 | F2-3 vs. L2-3 | 267429_at  | AT2G34850 | NAD(P)-binding Rossmann-fold superfamily protein;(source:Araport11)                                                                                                                                                                                                                                                                                                                                                                                                 | 208.75  | 107.09 | 1.95 | 7.66E-05 | 4.85E-04 |
| 1682 | 3 | F2-3 vs. L2-3 | 251469_at  | AT3G59530 | Calcium-dependent phosphotriesterase superfamily protein;(source:Araport11)                                                                                                                                                                                                                                                                                                                                                                                         | 44.42   | 22.74  | 1.95 | 2.49E-04 | 1.12E-03 |
| 1683 | 3 | F2-3 vs. L2-3 | 254683_at  | AT4G13800 | magnesium transporter NIPA (DUF803);(source:Araport11)                                                                                                                                                                                                                                                                                                                                                                                                              | 30.99   | 15.90  | 1.95 | 6.90E-06 | 9.18E-05 |
| 1684 | 3 | F2-3 vs. L2-3 | 246555_at  | AT5G15470 | Encodes a protein with putative galacturonosyltransferase activity.                                                                                                                                                                                                                                                                                                                                                                                                 | 35.60   | 18.25  | 1.95 | 1.50E-05 | 1.58E-04 |
| 1685 | 3 | F2-3 vs. L2-3 | 260320_at  | AT1G63930 | from the Czech roh meaning corner;(source:Araport11)                                                                                                                                                                                                                                                                                                                                                                                                                | 129.35  | 66.55  | 1.94 | 4.51E-04 | 1.73E-03 |
| 1686 | 3 | F2-3 vs. L2-3 | 260207_at  | AT1G70730 | Encodes a cytosolic phosphoglucomutase (PGM). Two Arabidopsis PGM proteins (AT1G70730/PGM2 and AT1G23190/PGM3) have high sequence similarities and redundant functions. Mature plants possessing a single cPGM allele had a major reduction in cPGM activity. Whereas pgm2 and pgm3 single mutants are undistinguishable from the wild type, loss of both PGM2 and PGM3 severely impairs male and female gametophyte development.                                   | 225.45  | 116.45 | 1.94 | 1.30E-04 | 7.07E-04 |
| 1687 | 3 | F2-3 vs. L2-3 | 258671_at  | AT3G08560 | vacuolar H+-ATPase subunit E isoform 2;(source:Araport11)                                                                                                                                                                                                                                                                                                                                                                                                           | 33.14   | 17.13  | 1.94 | 8.40E-06 | 1.05E-04 |
| 1688 | 3 | F2-3 vs. L2-3 | 256416_at  | AT3G11050 | ferritin 2;(source:Araport11)                                                                                                                                                                                                                                                                                                                                                                                                                                       | 171.18  | 88.03  | 1.94 | 5.10E-05 | 3.67E-04 |
| 1689 | 3 | F2-3 vs. L2-3 | 251968_at  | AT3G53100 | GDLSL-motif esterase/acyltransferase/lipase. Enzyme group with broad substrate specificity that may catalyze acyltransfer or hydrolase reactions with lipid and non-lipid substrates. Protein interacts with Agrobacterium proteins VirD2 and VirE2. Is not individually essential for Agrobacterium-mediated root transformation, but when overexpressed can rescue the impa-4 decreased transformation susceptibility phenotype.                                  | 45.31   | 23.39  | 1.94 | 3.11E-04 | 1.33E-03 |
| 1690 | 3 | F2-3 vs. L2-3 | 245216_at  | AT4G16143 | NAD(P)H-quinone oxidoreductase subunit S;(source:Araport11)                                                                                                                                                                                                                                                                                                                                                                                                         | 79.23   | 40.85  | 1.94 | 6.30E-06 | 8.66E-05 |
| 1691 | 3 | F2-3 vs. L2-3 | 254187_at  | AT4G23890 |                                                                                                                                                                                                                                                                                                                                                                                                                                                                     | 301.54  | 155.73 | 1.94 | 5.20E-04 | 1.94E-03 |
| 1692 | 3 | F2-3 vs. L2-3 | 247925_at  | AT5G57560 | Encodes a cell wall-modifying enzyme, rapidly upregulated in response to environmental stimuli.                                                                                                                                                                                                                                                                                                                                                                     | 126.31  | 65.13  | 1.94 | 4.03E-05 | 3.11E-04 |
| 1693 | 3 | F2-3 vs. L2-3 | 261279_at  | AT1G05850 | Encodes an endo chitinase-like protein AtCTL1. Essential for tolerance to heat, salt and drought stresses. Also involved in root hair development, cell expansion and response to cytokinin. Allelic to erh2. 11 alleles described in Hauser (1995). Mutant is defective in acquired thermotolerance, appears semidwarf throughout its life cycle and has extra lateral branches. There are two EMS alleles. Expression of AtHSP101 is not affected in the mutants. | 409.55  | 211.95 | 1.93 | 5.12E-05 | 3.68E-04 |
| 1694 | 3 | F2-3 vs. L2-3 | 261210_at  | AT1G12840 | Encodes subunit C of the vacuolar H(+)-ATPase (V-ATPase). Bound and phosphorylated by AtWINK8. The mRNA is cell-to-cell mobile.                                                                                                                                                                                                                                                                                                                                     | 1155.78 | 600.32 | 1.93 | 9.03E-05 | 5.48E-04 |

|      |   |               |           |           |                                                                                                                                                                                                                                                                                                                                                                                                                                                                                                                                                                                            |         |        |      |          |          |
|------|---|---------------|-----------|-----------|--------------------------------------------------------------------------------------------------------------------------------------------------------------------------------------------------------------------------------------------------------------------------------------------------------------------------------------------------------------------------------------------------------------------------------------------------------------------------------------------------------------------------------------------------------------------------------------------|---------|--------|------|----------|----------|
| 1695 | 3 | F2-3 vs. L2-3 | 262660_at | AT1G14000 | Encodes a protein with similarity to members of the C1 subgroup of MAP kinase kinase kinases. Interacts physically with the receptor kinase BRL2/VH1 and appears to be involved in auxin and brassinosteroid signaling. The mRNA is cell-to-cell mobile.                                                                                                                                                                                                                                                                                                                                   | 182.08  | 94.49  | 1.93 | 4.40E-06 | 6.55E-05 |
| 1696 | 3 | F2-3 vs. L2-3 | 260777_at | AT1G14560 | Encodes a mitochondrial CoA transporter.                                                                                                                                                                                                                                                                                                                                                                                                                                                                                                                                                   | 83.85   | 43.41  | 1.93 | 1.19E-04 | 6.65E-04 |
| 1697 | 3 | F2-3 vs. L2-3 | 262546_at | AT1G31260 | member of Fe(II) transporter isolog family                                                                                                                                                                                                                                                                                                                                                                                                                                                                                                                                                 | 30.86   | 15.98  | 1.93 | 8.24E-04 | 2.76E-03 |
| 1698 | 3 | F2-3 vs. L2-3 | 256019_at | AT1G58265 | Cytochrome P450 superfamily protein;(source:Araport11)<br>thylakoid luminal protein (Mog1/PsbP/DUF1795-like photosystem II reaction center PsbP family protein);(source:Araport11)                                                                                                                                                                                                                                                                                                                                                                                                         | 24.33   | 12.60  | 1.93 | 3.34E-05 | 2.69E-04 |
| 1699 | 3 | F2-3 vs. L2-3 | 264959_at | AT1G77090 | Encodes a putative auxin efflux carrier that is localized in developing and mature root meristems. It is involved in the maintenance of embryonic auxin gradients. A role for AtPIN4 in generating a sink for auxin below the quiescent center of the root meristem that is essential for auxin distribution and patterning is proposed. In the root, PIN4 is detected around the quiescent center and cells surrounding it, and localizes basally in provascular cells. PIN4 expression is upregulated in brassinosteroid-insensitive mutant (PMID 16141452).                             | 119.14  | 61.77  | 1.93 | 7.84E-05 | 4.94E-04 |
| 1700 | 3 | F2-3 vs. L2-3 | 266300_at | AT2G01420 | cytochrome b6f complex subunit (petM);(source:Araport11)                                                                                                                                                                                                                                                                                                                                                                                                                                                                                                                                   | 33.72   | 17.49  | 1.93 | 1.67E-04 | 8.43E-04 |
| 1701 | 3 | F2-3 vs. L2-3 | 245044_at | AT2G26500 | Encodes a protein localized to phloem filaments that is required for phloem filament formation. The mRNA is cell-to-cell mobile.                                                                                                                                                                                                                                                                                                                                                                                                                                                           | 1006.31 | 521.49 | 1.93 | 9.44E-05 | 5.62E-04 |
| 1702 | 3 | F2-3 vs. L2-3 | 259180_at | AT3G01680 | One of three isoforms of the iron-sulfur component of the succinate dehydrogenase complex, a component of the mitochondrial respiratory chain complex II. The product of the nuclear encoded gene is imported into the mitochondrion. Expressed during germination and post-germinative growth.                                                                                                                                                                                                                                                                                            | 34.17   | 17.72  | 1.93 | 1.44E-05 | 1.54E-04 |
| 1703 | 3 | F2-3 vs. L2-3 | 257713_at | AT3G27380 | Encodes NRGA1, a putative mitochondrial pyruvate carrier that mediates ABA regulation of guard cell ion channels and drought stress responses.                                                                                                                                                                                                                                                                                                                                                                                                                                             | 720.34  | 373.75 | 1.93 | 2.54E-04 | 1.14E-03 |
| 1704 | 3 | F2-3 vs. L2-3 | 255243_at | AT4G05590 | AMP-dependent synthetase and ligase family protein;(source:Araport11)                                                                                                                                                                                                                                                                                                                                                                                                                                                                                                                      | 24.30   | 12.59  | 1.93 | 6.59E-04 | 2.31E-03 |
| 1705 | 3 | F2-3 vs. L2-3 | 254961_at | AT4G11030 | NAD(P)H dehydrogenase B3;(source:Araport11)                                                                                                                                                                                                                                                                                                                                                                                                                                                                                                                                                | 22.69   | 11.74  | 1.93 | 3.80E-06 | 5.94E-05 |
| 1706 | 3 | F2-3 vs. L2-3 | 254419_at | AT4G21490 | encodes a stability and/or assembly factor of photosystem II The mRNA is cell-to-cell mobile.                                                                                                                                                                                                                                                                                                                                                                                                                                                                                              | 35.68   | 18.50  | 1.93 | 2.08E-04 | 9.86E-04 |
| 1707 | 3 | F2-3 vs. L2-3 | 249875_at | AT5G23120 | FAD/NAD(P)-binding oxidoreductase family protein;(source:Araport11)                                                                                                                                                                                                                                                                                                                                                                                                                                                                                                                        | 732.10  | 379.29 | 1.93 | 5.59E-04 | 2.04E-03 |
| 1708 | 3 | F2-3 vs. L2-3 | 246411_at | AT1G57770 | Mo25 family protein;(source:Araport11)                                                                                                                                                                                                                                                                                                                                                                                                                                                                                                                                                     | 29.45   | 15.36  | 1.92 | 1.97E-05 | 1.89E-04 |
| 1709 | 3 | F2-3 vs. L2-3 | 265705_at | AT2G03410 | Calcium-binding endonuclease/exonuclease/phosphatase family;(source:Araport11)                                                                                                                                                                                                                                                                                                                                                                                                                                                                                                             | 28.68   | 14.93  | 1.92 | 7.37E-04 | 2.52E-03 |
| 1710 | 3 | F2-3 vs. L2-3 | 248191_at | AT5G54130 | Immunoglobulin E-set superfamily protein;(source:Araport11)                                                                                                                                                                                                                                                                                                                                                                                                                                                                                                                                | 32.35   | 16.85  | 1.92 | 8.07E-04 | 2.72E-03 |
| 1711 | 3 | F2-3 vs. L2-3 | 264395_at | AT1G12070 | OBP32pep, putative (DUF220);(source:Araport11)                                                                                                                                                                                                                                                                                                                                                                                                                                                                                                                                             | 44.99   | 23.59  | 1.91 | 3.25E-04 | 1.37E-03 |
| 1712 | 3 | F2-3 vs. L2-3 | 260304_at | AT1G70480 | germin-like protein (GLP1)                                                                                                                                                                                                                                                                                                                                                                                                                                                                                                                                                                 | 163.91  | 85.64  | 1.91 | 4.38E-05 | 3.30E-04 |
| 1713 | 3 | F2-3 vs. L2-3 | 259892_at | AT1G72610 | Predicted to encode a PR (pathogenesis-related) protein. Belongs to the lipid transfer protein (PR-14) family with the following members: At2g38540/LTP1, At2g38530/LTP2, At5g59320/LTP3, At5g59310/LTP4, At3g51600/LTP5, At3g08770/LTP6, At2g15050/LTP7, At2g18370/LTP8, At2g15325/LTP9, At5g01870/LTP10, At4g33355/LTP11, At3g51590/LTP12, At5g44265/LTP13, At5g62065/LTP14, At4g08530/LTP15.                                                                                                                                                                                            | 65.26   | 34.17  | 1.91 | 1.69E-04 | 8.50E-04 |
| 1714 | 3 | F2-3 vs. L2-3 | 252115_at | AT3G51600 | Encodes a member of the CAZy Glycosyltransferase Family 64 that is involved in glycosylinositolphosphorylceramide and sphingolipid glycosylation. In mutants, seed germination was less sensitive to salt stress than in wild-type plants. [The protein was expected to be Golgi-localized based on function as well as the Golgi localization of its homolog GMT1. However, GFP-fusion proteins localized both to the ER and Golgi, and especially to ER when co-expressed with Golgi markers. Therefore, localization cannot confidently be defined. (pers. communication, J. Mortimer)] | 35.92   | 18.81  | 1.91 | 9.80E-06 | 1.17E-04 |
| 1715 | 3 | F2-3 vs. L2-3 | 250889_at | AT5G04500 | glycine/proline-rich protein;(source:Araport11)                                                                                                                                                                                                                                                                                                                                                                                                                                                                                                                                            | 75.77   | 39.68  | 1.91 | 5.01E-04 | 1.88E-03 |
| 1716 | 3 | F2-3 vs. L2-3 | 246440_at | AT5G17650 | phosphatidylinositol-speciwc phospholipase C5;(source:Araport11)                                                                                                                                                                                                                                                                                                                                                                                                                                                                                                                           | 44.27   | 23.12  | 1.91 | 3.04E-04 | 1.31E-03 |
| 1717 | 3 | F2-3 vs. L2-3 | 247775_at | AT5G58690 |                                                                                                                                                                                                                                                                                                                                                                                                                                                                                                                                                                                            | 22.69   | 11.89  | 1.91 | 1.83E-04 | 8.93E-04 |

|      |   |               |           |           |                                                                                                                                                                                                                                                                                                                                                                                                                                                                                                                                                                                                                                       |         |        |      |          |          |
|------|---|---------------|-----------|-----------|---------------------------------------------------------------------------------------------------------------------------------------------------------------------------------------------------------------------------------------------------------------------------------------------------------------------------------------------------------------------------------------------------------------------------------------------------------------------------------------------------------------------------------------------------------------------------------------------------------------------------------------|---------|--------|------|----------|----------|
|      |   |               |           |           | Mutant has reduced trichomes, anthocyanin, and seed coat mucilage and abnormally patterned stomates. Mutants are defective in jasmonate-induced anthocyanin accumulation. Encodes a bHLH Transcription Factor 1. The protein is functionally redundant with GL3 and TT8 and interacts with TTG1, the myb proteins GL1, PAP1 and 2, CPC and TRY, and it will form heterodimers with GL3. Expression in N (non-hair cell forming) cell layers is negatively regulated by WER. Expression in H cells (hair cell forming) is promoted by CPC/TRY.                                                                                         | 34.37   | 18.06  | 1.90 | 2.76E-04 | 1.21E-03 |
| 1718 | 3 | F2-3 vs. L2-3 | 260242_at | AT1G63650 |                                                                                                                                                                                                                                                                                                                                                                                                                                                                                                                                                                                                                                       |         |        |      |          |          |
| 1719 | 3 | F2-3 vs. L2-3 | 256548_at | AT3G14770 | Nodulin MtN3 family protein;(source:Araport11)                                                                                                                                                                                                                                                                                                                                                                                                                                                                                                                                                                                        | 34.19   | 17.96  | 1.90 | 2.65E-04 | 1.18E-03 |
| 1720 | 3 | F2-3 vs. L2-3 | 254033_at | AT4G25950 | V-ATPase G-subunit like protein                                                                                                                                                                                                                                                                                                                                                                                                                                                                                                                                                                                                       | 16.90   | 8.90   | 1.90 | 6.32E-04 | 2.24E-03 |
| 1721 | 3 | F2-3 vs. L2-3 | 246616_at | AT5G36260 | Eukaryotic aspartyl protease family protein;(source:Araport11)                                                                                                                                                                                                                                                                                                                                                                                                                                                                                                                                                                        | 67.79   | 35.65  | 1.90 | 1.98E-05 | 1.89E-04 |
| 1722 | 3 | F2-3 vs. L2-3 | 262879_at | AT1G64860 | Subunit of chloroplast RNA polymerase, confers the ability to recognize promoter sequences on the core enzyme                                                                                                                                                                                                                                                                                                                                                                                                                                                                                                                         | 212.96  | 112.51 | 1.89 | 9.04E-04 | 2.97E-03 |
| 1723 | 3 | F2-3 vs. L2-3 | 263796_at | AT2G24540 | Galactose oxidase/kelch repeat superfamily protein;(source:Araport11)                                                                                                                                                                                                                                                                                                                                                                                                                                                                                                                                                                 | 40.32   | 21.36  | 1.89 | 1.85E-04 | 8.99E-04 |
| 1724 | 3 | F2-3 vs. L2-3 | 257966_at | AT3G19800 | Encodes the DUF177B version of the two DUF177 proteins in Arabidopsis. This version differs from DUF177A in containing a 23 aa insertion compared to the DUF177A sequence.                                                                                                                                                                                                                                                                                                                                                                                                                                                            | 88.13   | 46.75  | 1.89 | 4.40E-04 | 1.71E-03 |
| 1725 | 3 | F2-3 vs. L2-3 | 252354_at | AT3G48170 | ALDH10A9 encodes a protein that can function as a betaine aldehyde dehydrogenase in vitro. The C-terminal amino acids of this protein direct GFP to the peroxisome suggesting that ALDH10A9 accumulates in this organelle. ALDH10A9 transcript levels rise in response to ABA, NaCl, chilling, methyl viologen, and dehydration stress. The enzyme can catalyze the formation of glycine betaine in vitro, but there are still questions about whether Arabidopsis makes this protective compound under natural conditions. This enzyme may be involved in oxidizing aminoaldehydes formed through polyamine metabolism.              | 1476.17 | 780.64 | 1.89 | 9.83E-04 | 3.18E-03 |
| 1726 | 3 | F2-3 vs. L2-3 | 254343_at | AT4G21990 | Encodes a protein disulfide isomerase-like (PDIL) protein, a member of a multigene family within the thioredoxin (TRX) superfamily. This protein also belongs to the adenosine 5'-phosphosulfate reductase-like (APRL) group.                                                                                                                                                                                                                                                                                                                                                                                                         | 326.49  | 172.35 | 1.89 | 2.87E-05 | 2.42E-04 |
| 1727 | 3 | F2-3 vs. L2-3 | 245906_at | AT5G11070 | hypothetical protein;(source:Araport11)                                                                                                                                                                                                                                                                                                                                                                                                                                                                                                                                                                                               | 106.83  | 56.50  | 1.89 | 5.44E-04 | 2.00E-03 |
| 1728 | 3 | F2-3 vs. L2-3 | 246566_at | AT5G14940 | Major facilitator superfamily protein;(source:Araport11)                                                                                                                                                                                                                                                                                                                                                                                                                                                                                                                                                                              | 45.60   | 24.17  | 1.89 | 9.42E-05 | 5.62E-04 |
| 1729 | 3 | F2-3 vs. L2-3 | 247544_at | AT5G61670 | Encodes a close homolog of the Cauliflower OR (Orange) protein that is located in the chloroplast of light grown organs but in the nucleus of etiolated cotyledons. The function of OR is to induce the differentiation of proplastids or other noncolored plastids into chromoplasts for carotenoid accumulation. Both proteins contain a Cysteine-rich zinc finger domain that is highly specific to DnaJ-like molecular chaperons. The AtOR protein interacts directly with the PSY (phytoene synthase) protein and acts as a positive posttranscriptional regulator of its expression, thereby affecting carotenoid biosynthesis. | 102.10  | 53.94  | 1.89 | 4.42E-05 | 3.32E-04 |
| 1730 | 3 | F2-3 vs. L2-3 | 264815_at | AT1G03620 | ELMO/CED-12 family protein;(source:Araport11)                                                                                                                                                                                                                                                                                                                                                                                                                                                                                                                                                                                         | 28.24   | 15.00  | 1.88 | 1.04E-04 | 6.07E-04 |
| 1731 | 3 | F2-3 vs. L2-3 | 262959_at | AT1G54290 | Translation initiation factor SU11 family protein;(source:Araport11)                                                                                                                                                                                                                                                                                                                                                                                                                                                                                                                                                                  | 539.91  | 286.83 | 1.88 | 8.55E-04 | 2.84E-03 |
| 1732 | 3 | F2-3 vs. L2-3 | 264186_at | AT1G54570 | Encodes a protein with phytol ester synthesis and diacylglycerol acyltransferase activities that is involved in the deposition of free phytol and free fatty acids in the form of phytol esters in chloroplasts, a process involved in maintaining the integrity of the photosynthetic membrane during abiotic stress and senescence.                                                                                                                                                                                                                                                                                                 | 65.25   | 34.67  | 1.88 | 1.38E-05 | 1.50E-04 |
| 1733 | 3 | F2-3 vs. L2-3 | 264741_at | AT1G62290 | Saposin-like aspartyl protease family protein;(source:Araport11)                                                                                                                                                                                                                                                                                                                                                                                                                                                                                                                                                                      | 36.75   | 19.53  | 1.88 | 7.68E-04 | 2.60E-03 |
| 1734 | 3 | F2-3 vs. L2-3 | 258805_at | AT3G04010 | O-Glycosyl hydrolases family 17 protein;(source:Araport11)                                                                                                                                                                                                                                                                                                                                                                                                                                                                                                                                                                            | 40.43   | 21.53  | 1.88 | 3.42E-05 | 2.74E-04 |
| 1735 | 3 | F2-3 vs. L2-3 | 259380_at | AT3G16340 | Encodes a p-coumaroyl alcohol exporter involved in lignin biosynthesis.                                                                                                                                                                                                                                                                                                                                                                                                                                                                                                                                                               | 31.84   | 16.93  | 1.88 | 1.37E-04 | 7.31E-04 |
| 1736 | 3 | F2-3 vs. L2-3 | 257172_at | AT3G23700 | Encodes a chloroplast-localized S1 domain-containing protein with RNA chaperone activity that affects the splicing and processing of chloroplast transcripts and plays a role in Arabidopsis seedling growth in the presence of ABA. Binds the chloroplast psbA RNA and some other chloroplast RNAs. Required for the stability of the chloroplast ndhC RNA. Inhibits ribosome association with psbA RNA and ycf1 RNA. Not required for the splicing of chloroplast trnL, as had been reported previously.                                                                                                                            | 111.83  | 59.64  | 1.88 | 9.05E-04 | 2.97E-03 |
| 1737 | 3 | F2-3 vs. L2-3 | 252671_at | AT3G44190 | FAD/NAD(P)-binding oxidoreductase family protein;(source:Araport11)                                                                                                                                                                                                                                                                                                                                                                                                                                                                                                                                                                   | 221.11  | 117.75 | 1.88 | 6.24E-04 | 2.23E-03 |
| 1738 | 3 | F2-3 vs. L2-3 | 254103_at | AT4G25030 | Plastid localized protein of unknown function. Mutants are more susceptible to P. syringae and produce less callose upon infection.                                                                                                                                                                                                                                                                                                                                                                                                                                                                                                   | 133.61  | 70.91  | 1.88 | 5.20E-06 | 7.50E-05 |
| 1739 | 3 | F2-3 vs. L2-3 | 253330_at | AT4G33530 | potassium transporter                                                                                                                                                                                                                                                                                                                                                                                                                                                                                                                                                                                                                 | 100.50  | 53.43  | 1.88 | 3.61E-04 | 1.47E-03 |

|      |   |               |           |           |                                                                                                                                                                                                                                                                                                                                                                                                                                                                                                |         |        |      |          |          |
|------|---|---------------|-----------|-----------|------------------------------------------------------------------------------------------------------------------------------------------------------------------------------------------------------------------------------------------------------------------------------------------------------------------------------------------------------------------------------------------------------------------------------------------------------------------------------------------------|---------|--------|------|----------|----------|
| 1740 | 3 | F2-3 vs. L2-3 | 250517_at | AT5G08260 | serine carboxypeptidase-like 35;(source:Araport11)                                                                                                                                                                                                                                                                                                                                                                                                                                             | 61.17   | 32.51  | 1.88 | 1.45E-04 | 7.63E-04 |
| 1741 | 3 | F2-3 vs. L2-3 | 247478_at | AT5G62360 | Pectin methylesterase inhibitor expressed throughout the plant.                                                                                                                                                                                                                                                                                                                                                                                                                                | 32.70   | 17.37  | 1.88 | 2.38E-05 | 2.13E-04 |
| 1742 | 3 | F2-3 vs. L2-3 | 261583_at | AT1G01090 | pyruvate dehydrogenase E1 alpha subunit                                                                                                                                                                                                                                                                                                                                                                                                                                                        | 269.57  | 143.92 | 1.87 | 1.42E-04 | 7.51E-04 |
| 1743 | 3 | F2-3 vs. L2-3 | 264727_at | AT1G22840 | Encodes cytochrome c. Contains two site II (TGGGCC/T) elements, which interact with a TCP-domain transcription factor, and a downstream internal telomeric repeat, and are required for expression of the Cytc-1 gene. Promoter directs preferential expression in root and shoot meristems and in anthers. Double mutants with CYTC-2 accumulate starch during the day, have delayed growth and development and reduced GA and DELLA proteins linking cellular metabolism and GA homeostasis. | 1183.42 | 634.21 | 1.87 | 5.47E-04 | 2.01E-03 |
| 1744 | 3 | F2-3 vs. L2-3 | 256213_at | AT1G50990 | kinase with tetratricopeptide repeat domain-containing protein;(source:Araport11)                                                                                                                                                                                                                                                                                                                                                                                                              | 23.82   | 12.73  | 1.87 | 4.02E-05 | 3.10E-04 |
| 1745 | 3 | F2-3 vs. L2-3 | 260002_at | AT1G67940 | member of NAP subfamily The mRNA is cell-to-cell mobile.                                                                                                                                                                                                                                                                                                                                                                                                                                       | 98.16   | 52.62  | 1.87 | 3.87E-04 | 1.55E-03 |
| 1746 | 3 | F2-3 vs. L2-3 | 260214_at | AT1G74510 | Galactose oxidase/kelch repeat superfamily protein;(source:Araport11)                                                                                                                                                                                                                                                                                                                                                                                                                          | 78.75   | 42.22  | 1.87 | 4.58E-04 | 1.75E-03 |
| 1747 | 3 | F2-3 vs. L2-3 | 266977_at | AT2G39420 | alpha/beta-Hydrolases superfamily protein;(source:Araport11)                                                                                                                                                                                                                                                                                                                                                                                                                                   | 23.40   | 12.49  | 1.87 | 3.50E-05 | 2.78E-04 |
| 1748 | 3 | F2-3 vs. L2-3 | 259056_at | AT3G03420 | Ku70-binding family protein;(source:Araport11)                                                                                                                                                                                                                                                                                                                                                                                                                                                 | 51.35   | 27.47  | 1.87 | 2.35E-04 | 1.07E-03 |
| 1749 | 3 | F2-3 vs. L2-3 | 258312_at | AT3G16170 | Encodes a malonyl-CoA synthetase that is localized to the cytosol and mitochondrion. AAE13 produces two transcripts one of which includes an N terminal mitochondrial targeting motif. Loss of function of the mtAAE13 product results in growth arrest and lethality.                                                                                                                                                                                                                         | 655.37  | 349.73 | 1.87 | 3.04E-04 | 1.31E-03 |
| 1750 | 3 | F2-3 vs. L2-3 | 255418_at | AT4G03200 | catalytics;(source:Araport11)                                                                                                                                                                                                                                                                                                                                                                                                                                                                  | 147.66  | 79.04  | 1.87 | 5.72E-04 | 2.07E-03 |
| 1751 | 3 | F2-3 vs. L2-3 | 246215_at | AT4G37180 | UIF1 is a nuclear and cytoplasmically localized myb-domain containing member of the GARP G2-like subfamily of transcription factors. Interacts with ULT1 and binds to the WUS promoter. UIF1 binding domains are also found in CUC and AG promoters suggesting they are also direct targets. This locus was also identified as a putative cytoskeletal protein in a yeast screen.                                                                                                              | 32.00   | 17.13  | 1.87 | 2.70E-04 | 1.19E-03 |
| 1752 | 3 | F2-3 vs. L2-3 | 250633_at | AT5G07460 | ubiquitous enzyme that repairs oxidatively damaged proteins. Methionine sulfoxide reductase activity. Mutant lacking reductase activity showed increased protein oxidation, nitration and glycation of specific amino acid residues during darkness.                                                                                                                                                                                                                                           | 26.62   | 14.21  | 1.87 | 5.69E-04 | 2.07E-03 |
| 1753 | 3 | F2-3 vs. L2-3 | 264504_at | AT1G09430 | Encodes subunit A of the heteromeric enzyme ATP citrate lyase (ACL). In animals, ACL is encoded by a single gene; ACL in Arabidopsis is composed of two polypeptides, ACLA (encoded by 3 genes) and ACLB (encoded by 2 genes). The holoenzyme has an A(4)B(4)stoichiometry. Expression of both ACLA and ACLB but not of either of the subunits alone results in ACL activity.                                                                                                                  | 84.86   | 45.50  | 1.86 | 1.77E-04 | 8.79E-04 |
| 1754 | 3 | F2-3 vs. L2-3 | 260969_at | AT1G12240 | Encodes a vacuolar invertase betaFruct4. betaFruct4 is transported from the endoplasmic reticulum through the intermediate compartments as a membrane protein. The N-terminal cytoplasmic domain contains multiple sequence motifs that are involved at various stages in the trafficking of betaFruct4 from the ER to the central vacuole. The mRNA is cell-to-cell mobile.                                                                                                                   | 24.64   | 13.24  | 1.86 | 6.74E-04 | 2.35E-03 |
| 1755 | 3 | F2-3 vs. L2-3 | 261031_at | AT1G17360 | LOW protein: protein phosphatase 1 regulatory subunit-like protein;(source:Araport11)                                                                                                                                                                                                                                                                                                                                                                                                          | 108.88  | 58.63  | 1.86 | 5.86E-04 | 2.11E-03 |
| 1756 | 3 | F2-3 vs. L2-3 | 261405_at | AT1G18740 | DUF793 domain containing protein. Expression is induced by cold. Loss of function mutations are more sensitive to freezing and have reduced levels of CBFs. May act by preventing degradation of CBFs.                                                                                                                                                                                                                                                                                         | 719.07  | 386.65 | 1.86 | 1.55E-04 | 8.02E-04 |
| 1757 | 3 | F2-3 vs. L2-3 | 259826_at | AT1G29340 | Encodes a protein containing a UND, a U-box, and an ARM domain. This protein has E3 ubiquitin ligase activity. It is required for cell death and full resistance specified by Arabidopsis RPM1 and RPS4 resistance proteins against Pseudomonas syringae pv tomato. The mRNA is cell-to-cell mobile.                                                                                                                                                                                           | 392.88  | 210.94 | 1.86 | 5.54E-04 | 2.03E-03 |
| 1758 | 3 | F2-3 vs. L2-3 | 261511_at | AT1G71770 | Encodes a Class I polyA-binding protein. Expressed in floral organs. Binds polyA sepharose in vitro.                                                                                                                                                                                                                                                                                                                                                                                           | 51.11   | 27.47  | 1.86 | 2.63E-04 | 1.17E-03 |
| 1759 | 3 | F2-3 vs. L2-3 | 258483_at | AT3G02570 | Encodes a protein with phosphomannose isomerase activity.                                                                                                                                                                                                                                                                                                                                                                                                                                      | 79.00   | 42.44  | 1.86 | 5.01E-05 | 3.63E-04 |
| 1760 | 3 | F2-3 vs. L2-3 | 258161_at | AT3G17930 | Encodes a thylakoid membrane protein involved in the accumulation of the cytochrome b6/f complex.                                                                                                                                                                                                                                                                                                                                                                                              | 101.27  | 54.35  | 1.86 | 1.51E-05 | 1.59E-04 |
| 1761 | 3 | F2-3 vs. L2-3 | 250146_at | AT5G14660 | Encodes a peptide deformylase PDF1B. The crystal structure has been determined at a resolution of 0.24 nm (Biochem J, 2008, vol 413:417-427).                                                                                                                                                                                                                                                                                                                                                  | 146.43  | 78.66  | 1.86 | 7.50E-04 | 2.55E-03 |
| 1762 | 3 | F2-3 vs. L2-3 | 249719_at | AT5G35735 | Auxin-responsive family protein;(source:Araport11)                                                                                                                                                                                                                                                                                                                                                                                                                                             | 31.19   | 16.74  | 1.86 | 1.08E-04 | 6.22E-04 |
| 1763 | 3 | F2-3 vs. L2-3 | 261037_at | AT1G17420 | LOX3 encode a Lipoxxygenase. Lipoxxygenases (LOXs) catalyze the oxygenation of fatty acids (FAs).                                                                                                                                                                                                                                                                                                                                                                                              | 29.93   | 16.21  | 1.85 | 9.95E-05 | 5.85E-04 |



|      |   |               |           |           |                                                                                                                                                                                                                                                                                                                                                                                                                                                                                                                                                                                                                                                                                                                                                                                                                                                                                                                                                                                                                               |         |         |      |          |          |
|------|---|---------------|-----------|-----------|-------------------------------------------------------------------------------------------------------------------------------------------------------------------------------------------------------------------------------------------------------------------------------------------------------------------------------------------------------------------------------------------------------------------------------------------------------------------------------------------------------------------------------------------------------------------------------------------------------------------------------------------------------------------------------------------------------------------------------------------------------------------------------------------------------------------------------------------------------------------------------------------------------------------------------------------------------------------------------------------------------------------------------|---------|---------|------|----------|----------|
| 1764 | 3 | F2-3 vs. L2-3 | 265943_at | AT2G19570 | Encodes a cytidine deaminase that deaminates cytidine and deoxycytidine and is competitively inhibited by cytosine-containing compounds.                                                                                                                                                                                                                                                                                                                                                                                                                                                                                                                                                                                                                                                                                                                                                                                                                                                                                      | 95.52   | 51.57   | 1.85 | 1.60E-04 | 8.18E-04 |
| 1765 | 3 | F2-3 vs. L2-3 | 263252_at | AT2G31380 | a B-box zinc finger protein that interacts with COP1. contains a novel 11 amino acid motif at the C-terminus (also found at the N-terminus of HY5) that is involved in the COP1 interaction.                                                                                                                                                                                                                                                                                                                                                                                                                                                                                                                                                                                                                                                                                                                                                                                                                                  | 51.05   | 27.53   | 1.85 | 5.62E-05 | 3.95E-04 |
| 1766 | 3 | F2-3 vs. L2-3 | 258849_at | AT3G03250 | Is thought to encode a cytosolic UDP-glucose pyrophosphorylase with strong similarity to potato UTP--glucose-1-phosphate uridylyltransferase. Downregulated by flooding.                                                                                                                                                                                                                                                                                                                                                                                                                                                                                                                                                                                                                                                                                                                                                                                                                                                      | 795.97  | 429.13  | 1.85 | 1.08E-04 | 6.22E-04 |
| 1767 | 3 | F2-3 vs. L2-3 | 252164_at | AT3G50620 | P-loop containing nucleoside triphosphate hydrolases superfamily protein;(source:Araport11)                                                                                                                                                                                                                                                                                                                                                                                                                                                                                                                                                                                                                                                                                                                                                                                                                                                                                                                                   | 28.79   | 15.52   | 1.85 | 7.07E-04 | 2.45E-03 |
| 1768 | 3 | F2-3 vs. L2-3 | 254890_at | AT4G11600 | Encodes glutathione peroxidase.                                                                                                                                                                                                                                                                                                                                                                                                                                                                                                                                                                                                                                                                                                                                                                                                                                                                                                                                                                                               | 63.65   | 34.35   | 1.85 | 4.65E-04 | 1.77E-03 |
| 1769 | 3 | F2-3 vs. L2-3 | 250800_at | AT5G05370 | Cytochrome b-c1 complex, subunit 8 protein;(source:Araport11)                                                                                                                                                                                                                                                                                                                                                                                                                                                                                                                                                                                                                                                                                                                                                                                                                                                                                                                                                                 | 181.37  | 98.03   | 1.85 | 2.57E-04 | 1.15E-03 |
| 1770 | 3 | F2-3 vs. L2-3 | 249063_at | AT5G44110 | Encodes a member of the NAP subfamily of ABC transporters whose expression pattern is regulated by light and sucrose.                                                                                                                                                                                                                                                                                                                                                                                                                                                                                                                                                                                                                                                                                                                                                                                                                                                                                                         | 188.43  | 101.66  | 1.85 | 2.02E-05 | 1.91E-04 |
| 1771 | 3 | F2-3 vs. L2-3 | 244902_at | ATMG00650 | Encodes NADH dehydrogenase subunit 4L.                                                                                                                                                                                                                                                                                                                                                                                                                                                                                                                                                                                                                                                                                                                                                                                                                                                                                                                                                                                        | 152.04  | 82.34   | 1.85 | 7.34E-05 | 4.71E-04 |
| 1772 | 3 | F2-3 vs. L2-3 | 265680_at | AT2G32150 | Haloacid dehalogenase-like hydrolase (HAD) superfamily protein;(source:Araport11)                                                                                                                                                                                                                                                                                                                                                                                                                                                                                                                                                                                                                                                                                                                                                                                                                                                                                                                                             | 81.15   | 44.01   | 1.84 | 2.44E-04 | 1.10E-03 |
| 1773 | 3 | F2-3 vs. L2-3 | 262323_at | AT1G64190 | 6-phosphogluconate dehydrogenase family protein;(source:Araport11)                                                                                                                                                                                                                                                                                                                                                                                                                                                                                                                                                                                                                                                                                                                                                                                                                                                                                                                                                            | 477.36  | 261.52  | 1.83 | 1.32E-04 | 7.19E-04 |
| 1774 | 3 | F2-3 vs. L2-3 | 259850_at | AT1G72240 | hypothetical protein;(source:Araport11)                                                                                                                                                                                                                                                                                                                                                                                                                                                                                                                                                                                                                                                                                                                                                                                                                                                                                                                                                                                       | 27.24   | 14.90   | 1.83 | 8.63E-04 | 2.86E-03 |
| 1775 | 3 | F2-3 vs. L2-3 | 265742_at | AT2G01290 | Cytosolic ribose-5-phosphate isomerase. Knockout mutation causes chloroplast dysfunction, late flowering and premature cell death.                                                                                                                                                                                                                                                                                                                                                                                                                                                                                                                                                                                                                                                                                                                                                                                                                                                                                            | 53.61   | 29.37   | 1.83 | 1.36E-04 | 7.28E-04 |
| 1776 | 3 | F2-3 vs. L2-3 | 258602_at | AT3G02750 | Protein phosphatase 2C family protein;(source:Araport11)                                                                                                                                                                                                                                                                                                                                                                                                                                                                                                                                                                                                                                                                                                                                                                                                                                                                                                                                                                      | 58.51   | 31.91   | 1.83 | 1.99E-04 | 9.56E-04 |
| 1777 | 3 | F2-3 vs. L2-3 | 257701_at | AT3G12710 | DNA glycosylase superfamily protein;(source:Araport11)                                                                                                                                                                                                                                                                                                                                                                                                                                                                                                                                                                                                                                                                                                                                                                                                                                                                                                                                                                        | 48.31   | 26.37   | 1.83 | 1.45E-04 | 7.63E-04 |
| 1778 | 3 | F2-3 vs. L2-3 | 256711_at | AT3G30390 | Encodes a putative amino acid transporter.<br>Encodes cystathionine beta-lyase, the second enzyme in the methionine biosynthetic pathway. Mutants show defects in root development, reduced methylation and maintenance of the quiescent center.                                                                                                                                                                                                                                                                                                                                                                                                                                                                                                                                                                                                                                                                                                                                                                              | 968.53  | 529.80  | 1.83 | 4.46E-04 | 1.72E-03 |
| 1779 | 3 | F2-3 vs. L2-3 | 251666_at | AT3G57050 | Encodes one of five HVA22 homologs in Arabidopsis. HVA22 is an ABA- and stress-inducible gene first isolated from barley. Members of this gene family have only been found in eukaryotes. AtHVA22e mRNA is upregulated to varying degrees in response to cold stress, salt stress, ABA treatment or dehydration.                                                                                                                                                                                                                                                                                                                                                                                                                                                                                                                                                                                                                                                                                                              | 811.75  | 444.63  | 1.83 | 7.57E-05 | 4.82E-04 |
| 1780 | 3 | F2-3 vs. L2-3 | 248466_at | AT5G50720 | beta carbonic anhydrase 6;(source:Araport11)                                                                                                                                                                                                                                                                                                                                                                                                                                                                                                                                                                                                                                                                                                                                                                                                                                                                                                                                                                                  | 44.22   | 24.16   | 1.83 | 1.18E-04 | 6.62E-04 |
| 1781 | 3 | F2-3 vs. L2-3 | 246396_at | AT1G58180 | Nucleotide-sugar transporter family protein;(source:Araport11)                                                                                                                                                                                                                                                                                                                                                                                                                                                                                                                                                                                                                                                                                                                                                                                                                                                                                                                                                                | 27.38   | 15.05   | 1.82 | 1.33E-04 | 7.21E-04 |
| 1782 | 3 | F2-3 vs. L2-3 | 259882_at | AT1G76670 | A member of ARF GTPase family. A thaliana has 21 members of this family, known to be essential for vesicle coating and uncoating and functions in GTP-binding. The gene is shown to play a role in cell division, cell expansion and cellulose production using antisense construct. The mRNA is cell-to-cell mobile.                                                                                                                                                                                                                                                                                                                                                                                                                                                                                                                                                                                                                                                                                                         | 323.86  | 178.01  | 1.82 | 1.49E-04 | 7.78E-04 |
| 1783 | 3 | F2-3 vs. L2-3 | 251257_at | AT3G62290 | Blue light receptor mediating blue-light regulated cotyledon expansion and flowering time. Positive regulator of the flowering-time gene CONSTANS. This gene possesses a light-induced CNT2 N-terminal homodimerisation domain. Involved in blue-light induced stomatal opening. Involved in triggering chromatin decondensation. An 80-residue motif (NC80) is sufficient to confer CRY2's physiological function. It is proposed that the PHR domain and the C-terminal tail of the unphosphorylated CRY2 form a "closed" conformation to suppress the NC80 motif in the absence of light. In response to blue light, the C-terminal tail of CRY2 is phosphorylated and electrostatically repelled from the surface of the PHR domain to form an "open" conformation, resulting in derepression of the NC80 motif and signal transduction to trigger photomorphogenic responses. Cry2 phosphorylation and degradation both occur in the nucleus. The life-time of cry2 signaling state in situ (in planta) is about 16 min. | 2912.21 | 1601.77 | 1.82 | 4.94E-05 | 3.59E-04 |
| 1784 | 3 | F2-3 vs. L2-3 | 263669_at | AT1G04400 | Nucleotide-sugar transporter family protein;(source:Araport11)                                                                                                                                                                                                                                                                                                                                                                                                                                                                                                                                                                                                                                                                                                                                                                                                                                                                                                                                                                | 191.65  | 106.13  | 1.81 | 1.90E-04 | 9.16E-04 |
| 1785 | 3 | F2-3 vs. L2-3 | 261455_at | AT1G21070 | This gene is predicted to encode an F-box protein that is evolutionarily conserved between Arabidopsis and other eukaryotes including S.cerevisiae and humans. It may play a role in regulating translation under conditions of temperature stress. FBP7 transcript levels are increased at high and low temperatures. The mRNA is cell-to-cell mobile.                                                                                                                                                                                                                                                                                                                                                                                                                                                                                                                                                                                                                                                                       | 38.76   | 21.39   | 1.81 | 4.11E-04 | 1.62E-03 |
| 1786 | 3 | F2-3 vs. L2-3 | 262500_at | AT1G21760 |                                                                                                                                                                                                                                                                                                                                                                                                                                                                                                                                                                                                                                                                                                                                                                                                                                                                                                                                                                                                                               | 77.90   | 42.98   | 1.81 | 6.47E-05 | 4.33E-04 |

|      |   |               |           |           |                                                                                                                                                                                                                                                                                                                                                                                                                                                                                                                                                                                                                                            |        |        |      |          |          |
|------|---|---------------|-----------|-----------|--------------------------------------------------------------------------------------------------------------------------------------------------------------------------------------------------------------------------------------------------------------------------------------------------------------------------------------------------------------------------------------------------------------------------------------------------------------------------------------------------------------------------------------------------------------------------------------------------------------------------------------------|--------|--------|------|----------|----------|
| 1787 | 3 | F2-3 vs. L2-3 | 262263_at | AT1G70940 | A regulator of auxin efflux and involved in differential growth. PIN3 is expressed in gravity-sensing tissues, with PIN3 protein accumulating predominantly at the lateral cell surface. PIN3 localizes to the plasma membrane and to vesicles. In roots, PIN3 is expressed without pronounced polarity in tiers two and three of the columella cells, at the basal side of vascular cells, and to the lateral side of pericycle cells of the elongation zone. PIN3 overexpression inhibits root cell growth. Protein phosphorylation plays a role in regulating PIN3 trafficking to the plasma membrane. The mRNA is cell-to-cell mobile. | 46.84  | 25.94  | 1.81 | 2.91E-04 | 1.26E-03 |
| 1788 | 3 | F2-3 vs. L2-3 | 260080_at | AT1G78160 | Encodes a member of the Arabidopsis Pumilio (APUM) proteins containing PUF domain (eight repeats of approximately 36 amino acids each). PUF proteins regulate both mRNA stability and translation through sequence-specific binding to the 3' UTR of target mRNA transcripts. Encodes IRON REGULATED1 (IREG1/FPN1), one of the Arabidopsis orthologs (AT2G38460/IREG1/FPN1 and AT5G03570/IREG2/FPN2) the iron efflux transporter ferroportin (FPN) identified in animals.                                                                                                                                                                  | 36.82  | 20.36  | 1.81 | 1.04E-04 | 6.08E-04 |
| 1789 | 3 | F2-3 vs. L2-3 | 267029_at | AT2G38460 | response regulator 16                                                                                                                                                                                                                                                                                                                                                                                                                                                                                                                                                                                                                      | 114.56 | 63.17  | 1.81 | 1.20E-04 | 6.65E-04 |
| 1790 | 3 | F2-3 vs. L2-3 | 266078_at | AT2G40670 | O-fucosyltransferase family protein;(source:Araport11)                                                                                                                                                                                                                                                                                                                                                                                                                                                                                                                                                                                     | 29.99  | 16.59  | 1.81 | 9.90E-05 | 5.82E-04 |
| 1791 | 3 | F2-3 vs. L2-3 | 258040_at | AT3G21190 |                                                                                                                                                                                                                                                                                                                                                                                                                                                                                                                                                                                                                                            | 450.61 | 248.76 | 1.81 | 2.63E-04 | 1.17E-03 |
| 1792 | 3 | F2-3 vs. L2-3 | 257150_at | AT3G27230 | S-adenosyl-L-methionine-dependent methyltransferases superfamily protein;(source:Araport11)                                                                                                                                                                                                                                                                                                                                                                                                                                                                                                                                                | 119.38 | 66.07  | 1.81 | 3.33E-05 | 2.69E-04 |
| 1793 | 3 | F2-3 vs. L2-3 | 252906_at | AT4G39640 | The gene encodes a gamma-glutamyltransferase (AKA gamma-glutamyl transpeptidase, EC 2.3.2.2) that is located in vascular tissues (predominantly phloem) of leaves and is involved in the degradation of glutathione. The encoded enzyme also mitigates oxidative stress by metabolizing GSSG (oxidized form of GSH - glutathione) in the apoplast.                                                                                                                                                                                                                                                                                         | 57.86  | 31.95  | 1.81 | 6.11E-05 | 4.19E-04 |
| 1794 | 3 | F2-3 vs. L2-3 | 248140_at | AT5G54980 | Uncharacterized protein family (UPF0497);(source:Araport11)                                                                                                                                                                                                                                                                                                                                                                                                                                                                                                                                                                                | 98.36  | 54.26  | 1.81 | 1.36E-04 | 7.28E-04 |
| 1795 | 3 | F2-3 vs. L2-3 | 247030_at | AT5G67210 | Encode a DUF579 (domain of unknown function 579) containing protein essential for normal xylan synthesis and deposition in the secondary cell wall.                                                                                                                                                                                                                                                                                                                                                                                                                                                                                        | 27.21  | 15.07  | 1.81 | 6.51E-04 | 2.30E-03 |
| 1796 | 3 | F2-3 vs. L2-3 | 262756_at | AT1G16370 | organic cation/carnitine transporter 6;(source:Araport11)                                                                                                                                                                                                                                                                                                                                                                                                                                                                                                                                                                                  | 28.42  | 15.79  | 1.80 | 4.74E-04 | 1.80E-03 |
| 1797 | 3 | F2-3 vs. L2-3 | 260518_at | AT1G51410 | similar to Eucalyptus gunnii alcohol dehydrogenase of unknown physiological function (GI:1143445), apple tree, PIR:T16995; NOT a cinnamyl-alcohol dehydrogenase                                                                                                                                                                                                                                                                                                                                                                                                                                                                            | 41.89  | 23.34  | 1.80 | 1.86E-05 | 1.83E-04 |
| 1798 | 3 | F2-3 vs. L2-3 | 260274_at | AT1G80460 | Encodes a protein similar to glycerol kinase, which converts glycerol to glycerol 3-phosphate and performs a rate-limiting step in glycerol metabolism. This gene is required for both general and specific resistance against bacteria and fungi. Arabidopsis thaliana glycerol kinase (GLR1) mRNA. Involved in flagellin-induced non-host resistance to Pseudomonas. Coronatine partially suppresses flagellin-induced expression of NHO1.                                                                                                                                                                                               | 706.70 | 391.77 | 1.80 | 4.66E-04 | 1.78E-03 |
| 1799 | 3 | F2-3 vs. L2-3 | 267151_at | AT2G30970 | ASPARTATE AMINOTRANSFERASE 1                                                                                                                                                                                                                                                                                                                                                                                                                                                                                                                                                                                                               | 138.54 | 76.94  | 1.80 | 5.41E-04 | 1.99E-03 |
| 1800 | 3 | F2-3 vs. L2-3 | 258545_at | AT3G07050 | Arabidopsis NSN1 encodes a nucleolar GTP- binding protein and is required for maintenance of inflorescence meristem identity and floral organ development.                                                                                                                                                                                                                                                                                                                                                                                                                                                                                 | 247.88 | 137.97 | 1.80 | 1.02E-05 | 1.20E-04 |
| 1801 | 3 | F2-3 vs. L2-3 | 257881_at | AT3G17180 | serine carboxypeptidase-like 33;(source:Araport11)                                                                                                                                                                                                                                                                                                                                                                                                                                                                                                                                                                                         | 46.18  | 25.59  | 1.80 | 1.81E-04 | 8.86E-04 |
| 1802 | 3 | F2-3 vs. L2-3 | 257082_at | AT3G20580 | COBRA-like protein 10 precursor;(source:Araport11)                                                                                                                                                                                                                                                                                                                                                                                                                                                                                                                                                                                         | 45.39  | 25.23  | 1.80 | 8.55E-04 | 2.84E-03 |
| 1803 | 3 | F2-3 vs. L2-3 | 257824_at | AT3G25290 | Auxin-responsive family protein;(source:Araport11)                                                                                                                                                                                                                                                                                                                                                                                                                                                                                                                                                                                         | 23.17  | 12.85  | 1.80 | 1.75E-04 | 8.74E-04 |
| 1804 | 3 | F2-3 vs. L2-3 | 252736_at | AT3G43210 | Encodes a kinesin TETRASPORE. Required for cytokinesis in pollen. In mutants, all four microspore nuclei remain within the same cytoplasm after meiosis.                                                                                                                                                                                                                                                                                                                                                                                                                                                                                   | 46.18  | 25.64  | 1.80 | 7.90E-06 | 1.02E-04 |
| 1805 | 3 | F2-3 vs. L2-3 | 251757_at | AT3G55640 | Mitochondrial substrate carrier family protein;(source:Araport11)                                                                                                                                                                                                                                                                                                                                                                                                                                                                                                                                                                          | 199.68 | 111.02 | 1.80 | 4.68E-05 | 3.45E-04 |
| 1806 | 3 | F2-3 vs. L2-3 | 253779_at | AT4G28490 | Member of Receptor kinase-like protein family. Controls the separation step of floral organ abscission. The mRNA is cell-to-cell mobile.                                                                                                                                                                                                                                                                                                                                                                                                                                                                                                   | 35.10  | 19.49  | 1.80 | 5.90E-06 | 8.35E-05 |
| 1807 | 3 | F2-3 vs. L2-3 | 250337_at | AT5G11790 | Plays a role in dehydration stress response. PAM71 encodes an integral thylakoid membrane protein that is required for normal operation of oxygen-evolving complex (as evidenced by oxygen evolution rates) and for manganese incorporation. PAM71 belongs to a small gene family in Arabidopsis comprising five members. PAM71 is well conserved in the green lineage and shares homology with putative Ca2+/H+ exchangers from yeast (Saccharomyces cerevisiae) (GDT1) and human (Homo sapiens) (TMEM165).                                                                                                                               | 121.21 | 67.26  | 1.80 | 1.36E-04 | 7.28E-04 |
| 1808 | 3 | F2-3 vs. L2-3 | 262342_at | AT1G64150 | Encodes a 3-hydroxy-3-methylglutaryl-CoA reductase (HMGR) that is involved in the synthesis of sterol and triterpenoid compounds.                                                                                                                                                                                                                                                                                                                                                                                                                                                                                                          | 94.54  | 52.95  | 1.79 | 5.21E-04 | 1.94E-03 |
| 1809 | 3 | F2-3 vs. L2-3 | 264856_at | AT2G17370 |                                                                                                                                                                                                                                                                                                                                                                                                                                                                                                                                                                                                                                            | 41.73  | 23.34  | 1.79 | 6.41E-04 | 2.27E-03 |

|      |   |               |                   |           |                                                                                                                                                                                                                                                                                                                                                                       |        |        |      |          |          |
|------|---|---------------|-------------------|-----------|-----------------------------------------------------------------------------------------------------------------------------------------------------------------------------------------------------------------------------------------------------------------------------------------------------------------------------------------------------------------------|--------|--------|------|----------|----------|
| 1810 | 3 | F2-3 vs. L2-3 | 267087_at         | AT2G32460 | Member of the R2R3 factor gene family.                                                                                                                                                                                                                                                                                                                                | 50.06  | 28.04  | 1.79 | 7.25E-05 | 4.66E-04 |
| 1811 | 3 | F2-3 vs. L2-3 | 258288_at         | AT3G23290 | LIGHT-DEPENDENT SHORT HYPOCOTYLS-like protein (DUF640);(source:Araport11)                                                                                                                                                                                                                                                                                             | 40.53  | 22.64  | 1.79 | 4.94E-04 | 1.86E-03 |
| 1812 | 3 | F2-3 vs. L2-3 | 250075_at         | AT5G17670 | alpha/beta-Hydrolases superfamily protein;(source:Araport11)                                                                                                                                                                                                                                                                                                          | 172.33 | 96.27  | 1.79 | 2.59E-04 | 1.16E-03 |
| 1813 | 3 | F2-3 vs. L2-3 | 265093_at         | AT1G03905 | P-loop containing nucleoside triphosphate hydrolases superfamily protein;(source:Araport11)                                                                                                                                                                                                                                                                           | 67.30  | 37.78  | 1.78 | 3.73E-04 | 1.51E-03 |
| 1814 | 3 | F2-3 vs. L2-3 | 256530_at         | AT1G33290 | P-loop containing nucleoside triphosphate hydrolases superfamily protein;(source:Araport11)                                                                                                                                                                                                                                                                           | 64.08  | 35.97  | 1.78 | 1.78E-04 | 8.81E-04 |
| 1815 | 3 | F2-3 vs. L2-3 | 261326_s_a        | AT1G44820 | Peptidase M20/M25/M40 family protein;(source:Araport11)                                                                                                                                                                                                                                                                                                               | 58.19  | 32.68  | 1.78 | 4.20E-06 | 6.33E-05 |
| 1816 | 3 | F2-3 vs. L2-3 | 260616_at         | AT1G53280 | Encodes a homolog of animal DJ-1 superfamily protein. In the A. thaliana genome, three genes encoding close homologs of human DJ-1 were identified AT3G14990 (DJ1A), AT1G53280 (DJ1B) and AT4G34020 (DJ1C). Among the three homologs, DJ1C is essential for chloroplast development and viability. It exhibits glyoxalase activity towards glyoxal and methylglyoxal. | 792.17 | 446.20 | 1.78 | 1.11E-04 | 6.34E-04 |
| 1817 | 3 | F2-3 vs. L2-3 | 261958_at         | AT1G64500 | A member of a protein family found in plants and animals that contain conserved C-terminal glutaredoxin-like and putative zinc-binding cysteine-rich domains. It is involved in light stimulated actin bundling and chloroplast movement. The mRNA is cell-to-cell mobile.                                                                                            | 43.51  | 24.38  | 1.78 | 6.28E-04 | 2.23E-03 |
| 1818 | 3 | F2-3 vs. L2-3 | 263876_at         | AT2G21880 | RAB GTPase homolog 7A;(source:Araport11)                                                                                                                                                                                                                                                                                                                              | 53.17  | 29.95  | 1.78 | 5.84E-05 | 4.05E-04 |
| 1819 | 3 | F2-3 vs. L2-3 | 266168_at         | AT2G38870 | Predicted to encode a PR (pathogenesis-related) peptide that belongs to the PR-6 proteinase inhibitor family. Six putative PR-6-type protein encoding genes are found in Arabidopsis: At2g38900, At2g38870, At5g43570, At5g43580, At3g50020 and At3g46860.                                                                                                            | 38.90  | 21.91  | 1.78 | 7.35E-04 | 2.52E-03 |
| 1820 | 3 | F2-3 vs. L2-3 | 247109_at         | AT5G65870 | Probable phytoosulfofines 5 precursor, coding for a unique plant peptide growth factor.                                                                                                                                                                                                                                                                               | 17.63  | 9.92   | 1.78 | 2.81E-04 | 1.23E-03 |
| 1821 | 3 | F2-3 vs. L2-3 | 264440_at         | AT1G27340 | Encodes a putative F-box protein that is involved in the regulation of leaf morphology. Encodes a transcription factor, TFIIB1, that plays important roles in pollen tube growth, guidance, and reception as well as endosperm development and is partially functionally different from AtTFIIB2 and AtTFIIB3/AtpBRP2.                                                | 117.04 | 66.31  | 1.77 | 3.90E-05 | 3.04E-04 |
| 1822 | 3 | F2-3 vs. L2-3 | 245114_at         | AT2G41630 | Encodes HopW1-1-Interacting protein 2 (WIN2). Interacts with the P. syringae effector HopW1-1. WIN2 has protein phosphatase activity. Modulates plant defenses against bacteria. Three WIN proteins are identified so far (WIN1: AT1G80600; WIN2: AT4G31750; WIN3: AT5G13320).                                                                                        | 502.12 | 284.43 | 1.77 | 3.01E-04 | 1.29E-03 |
| 1823 | 3 | F2-3 vs. L2-3 | 253512_at         | AT4G31750 | nodulin MtN21-like transporter family protein                                                                                                                                                                                                                                                                                                                         | 53.13  | 29.94  | 1.77 | 3.19E-05 | 2.61E-04 |
| 1824 | 3 | F2-3 vs. L2-3 | 249397_at         | AT5G40230 | Seedling lethal mutation; Mitochondrial Carnitine Acyl Carrier-Like Protein                                                                                                                                                                                                                                                                                           | 346.20 | 196.03 | 1.77 | 2.08E-04 | 9.86E-04 |
| 1825 | 3 | F2-3 vs. L2-3 | 248838_at         | AT5G46800 |                                                                                                                                                                                                                                                                                                                                                                       |        |        |      |          |          |
| 1826 | 3 | F2-3 vs. L2-3 | 252293_at         | AT3G48990 | Encodes an oxalyl-CoA synthetase and is required for oxalate degradation, for normal seed development, and for defense against an oxalate-producing fungal pathogen.                                                                                                                                                                                                  | 380.97 | 217.01 | 1.76 | 8.63E-04 | 2.86E-03 |
| 1827 | 3 | F2-3 vs. L2-3 | 254710_at         | AT4G18050 | P-glycoprotein 9;(source:Araport11)                                                                                                                                                                                                                                                                                                                                   | 23.49  | 13.35  | 1.76 | 6.91E-04 | 2.40E-03 |
| 1828 | 3 | F2-3 vs. L2-3 | 245891_at         | AT5G09220 | member of AAAP family The mRNA is cell-to-cell mobile. Encodes SRT2, a member of the SIR2 (sirtuin) family HDAC (histone deacetylase) (SRT1/AT5g55760, SRT2/AT5G09230).                                                                                                                                                                                               | 47.70  | 27.16  | 1.76 | 5.18E-04 | 1.93E-03 |
| 1829 | 3 | F2-3 vs. L2-3 | 245895_at         | AT5G09230 | Encodes a leucine-rich repeat receptor kinase (LRR-RK) involved in the perception of phytoosulfofokine (PSK), which is a 5-aa tyrosine-sulfated peptide that primarily promotes cellular proliferation.                                                                                                                                                               | 103.70 | 59.06  | 1.76 | 3.04E-04 | 1.31E-03 |
| 1830 | 3 | F2-3 vs. L2-3 | 248237_at         | AT5G53890 |                                                                                                                                                                                                                                                                                                                                                                       | 35.33  | 20.04  | 1.76 | 3.19E-04 | 1.35E-03 |
| 1831 | 3 | F2-3 vs. L2-3 | 247693_at         | AT5G59730 | A member of EXO70 gene family, putative exocyst subunits, conserved in land plants. Arabidopsis thaliana contains 23 putative EXO70 genes, which can be classified into eight clusters on the phylogenetic tree. The mRNA is cell-to-cell mobile.                                                                                                                     | 78.73  | 44.69  | 1.76 | 1.79E-04 | 8.84E-04 |
| 1832 | 3 | F2-3 vs. L2-3 | AFFX-r2-At-Actin- | AT5G09810 | Member of Actin gene family.Mutants are defective in germination and root growth. The mRNA is cell-to-cell mobile.                                                                                                                                                                                                                                                    | 702.19 | 400.13 | 1.75 | 2.23E-04 | 1.04E-03 |
| 1833 | 3 | F2-3 vs. L2-3 | 264436_at         | AT1G10370 | Encodes GSTU17 (Glutathione S-Transferase U17). Functions as a negative component of stress-mediated signal transduction pathways in drought and salt stress responses.                                                                                                                                                                                               | 130.28 | 74.33  | 1.75 | 9.50E-06 | 1.14E-04 |

|      |   |               |            |           |                                                                                                                                                                                                                                                                                                                                                                                                                                           |         |         |      |          |          |
|------|---|---------------|------------|-----------|-------------------------------------------------------------------------------------------------------------------------------------------------------------------------------------------------------------------------------------------------------------------------------------------------------------------------------------------------------------------------------------------------------------------------------------------|---------|---------|------|----------|----------|
| 1834 | 3 | F2-3 vs. L2-3 | 256115_at  | AT1G16880 | Encodes a ACT domain-containing protein. The ACT domain, named after bacterial aspartate kinase, chorismate mutase and TyrA (prephenate dehydrogenase), is a regulatory domain that serves as an amino acid-binding site in feedback-regulated amino acid metabolic enzymes. The mRNA is cell-to-cell mobile.                                                                                                                             | 261.08  | 149.07  | 1.75 | 8.81E-05 | 5.37E-04 |
| 1835 | 3 | F2-3 vs. L2-3 | 259588_at  | AT1G27930 | Arabinogalactan methyltransferase,involved in arabinogalactan glucuronic acid methylation. Interacts with eIF3.                                                                                                                                                                                                                                                                                                                           | 59.22   | 33.88   | 1.75 | 5.84E-04 | 2.11E-03 |
| 1836 | 3 | F2-3 vs. L2-3 | 245742_at  | AT1G44170 | Encodes an aldehyde dehydrogenase induced by ABA and dehydration that can oxidize saturated aliphatic aldehydes. It is also able to oxidize beta-unsaturated aldehydes, but not aromatic aldehydes. Activity of ALDH3H1 is NAD +-dependent.                                                                                                                                                                                               | 51.60   | 29.56   | 1.75 | 2.31E-05 | 2.08E-04 |
| 1837 | 3 | F2-3 vs. L2-3 | 265122_at  | AT1G62540 | belongs to the flavin-monooxygenase (FMO) family, encodes a glucosinolate S-oxygenase that catalyzes the conversion of methylthioalkyl glucosinolates to methylsulfinylalkyl glucosinolatesThe mRNA is cell-to-cell mobile.                                                                                                                                                                                                               | 21.15   | 12.10   | 1.75 | 1.64E-04 | 8.34E-04 |
| 1838 | 3 | F2-3 vs. L2-3 | 263489_at  | AT2G31830 | Encodes a 5-inositol-polyphosphate phosphatase, that, in vitro, shows some activity against Ins(1,4,5)P3 and PI(3,4,5)P3, but even higher activity against PI(4,5)P2                                                                                                                                                                                                                                                                      | 27.73   | 15.87   | 1.75 | 9.09E-04 | 2.98E-03 |
| 1839 | 3 | F2-3 vs. L2-3 | 263775_at  | AT2G46410 | Nuclear-localized R3-type MYB transcription factor. Positive regulator of hair-cell differentiation. Preferentially transcribed in hairless cells. Moves from atrichoblasts into trichoblast via plasmodesmata in a tissue-specific mode. N-terminus and part of the Myb domain are required for this movement, with W76 playing a crucial role. Capability to increase the size-exclusion limit of plasmodesmata. Regulated by WEREWOLF. | 31.40   | 17.94   | 1.75 | 2.90E-04 | 1.26E-03 |
| 1840 | 3 | F2-3 vs. L2-3 | 252483_at  | AT3G46600 | GRAS family transcription factor;(source:Araport11)                                                                                                                                                                                                                                                                                                                                                                                       | 32.65   | 18.69   | 1.75 | 3.16E-05 | 2.60E-04 |
| 1841 | 3 | F2-3 vs. L2-3 | 254279_at  | AT4G22750 | Encodes a protein S-acyltransferase that, together with PAT14, cooperatively regulates leaf senescence.                                                                                                                                                                                                                                                                                                                                   | 49.88   | 28.58   | 1.75 | 2.95E-04 | 1.27E-03 |
| 1842 | 3 | F2-3 vs. L2-3 | 247426_at  | AT5G62570 | Calmodulin binding protein-like protein;(source:Araport11)                                                                                                                                                                                                                                                                                                                                                                                | 54.12   | 31.00   | 1.75 | 6.68E-04 | 2.34E-03 |
| 1843 | 3 | F2-3 vs. L2-3 | 259693_at  | AT1G63060 | ribosome biogenesis NEP1-like protein;(source:Araport11)                                                                                                                                                                                                                                                                                                                                                                                  | 25.31   | 14.53   | 1.74 | 8.03E-05 | 5.03E-04 |
| 1844 | 3 | F2-3 vs. L2-3 | 262727_at  | AT1G75800 | Pathogenesis-related thaumatin superfamily protein;(source:Araport11)                                                                                                                                                                                                                                                                                                                                                                     | 49.19   | 28.34   | 1.74 | 4.06E-04 | 1.61E-03 |
| 1845 | 3 | F2-3 vs. L2-3 | 264045_at  | AT2G22450 | riboflavin biosynthesis protein;(source:Araport11)                                                                                                                                                                                                                                                                                                                                                                                        | 65.92   | 37.78   | 1.74 | 5.37E-04 | 1.99E-03 |
| 1846 | 3 | F2-3 vs. L2-3 | 258470_at  | AT3G06035 | Glycoprotein membrane precursor GPI-anchored;(source:Araport11)                                                                                                                                                                                                                                                                                                                                                                           | 21.28   | 12.22   | 1.74 | 1.12E-05 | 1.27E-04 |
| 1847 | 3 | F2-3 vs. L2-3 | 246486_at  | AT5G15910 | NAD(P)-binding Rossmann-fold superfamily protein;(source:Araport11)                                                                                                                                                                                                                                                                                                                                                                       | 42.02   | 24.18   | 1.74 | 4.87E-04 | 1.84E-03 |
| 1848 | 3 | F2-3 vs. L2-3 | 249658_s_a | AT5G36700 | 2-phosphoglycolate phosphatase 1;(source:Araport11)                                                                                                                                                                                                                                                                                                                                                                                       | 316.49  | 181.78  | 1.74 | 3.14E-04 | 1.33E-03 |
| 1849 | 3 | F2-3 vs. L2-3 | 247185_at  | AT5G65460 | Kinesin that binds cyclin-dependent kinase CDKA;1 as homodimer or as heterodimer with KCA1                                                                                                                                                                                                                                                                                                                                                | 49.55   | 28.53   | 1.74 | 2.40E-04 | 1.09E-03 |
| 1850 | 3 | F2-3 vs. L2-3 | 247125_at  | AT5G66070 | E3 ubiquitin ligase that functions in negative regulation of ABA signaling.                                                                                                                                                                                                                                                                                                                                                               | 144.16  | 82.86   | 1.74 | 1.23E-04 | 6.80E-04 |
| 1851 | 3 | F2-3 vs. L2-3 | 246288_at  | AT1G31850 | S-adenosyl-L-methionine-dependent methyltransferases superfamily protein;(source:Araport11)                                                                                                                                                                                                                                                                                                                                               | 37.07   | 21.42   | 1.73 | 4.08E-04 | 1.61E-03 |
| 1852 | 3 | F2-3 vs. L2-3 | 263368_at  | AT2G20470 | AGC (cAMP-dependent, cGMP-dependent and protein kinase C) kinase family protein;(source:Araport11)                                                                                                                                                                                                                                                                                                                                        | 70.75   | 40.86   | 1.73 | 8.36E-04 | 2.79E-03 |
| 1853 | 3 | F2-3 vs. L2-3 | 258925_at  | AT3G10420 | P-loop containing nucleoside triphosphate hydrolases superfamily protein;(source:Araport11)                                                                                                                                                                                                                                                                                                                                               | 299.86  | 173.70  | 1.73 | 2.55E-04 | 1.14E-03 |
| 1854 | 3 | F2-3 vs. L2-3 | 258017_at  | AT3G19370 | filament-like protein (DUF869);(source:Araport11)                                                                                                                                                                                                                                                                                                                                                                                         | 19.27   | 11.13   | 1.73 | 6.16E-05 | 4.21E-04 |
| 1855 | 3 | F2-3 vs. L2-3 | 255305_at  | AT4G04770 | Encodes an iron-stimulated ATPase. A member of the NAP subfamily of ABC transporters. Involved in Fe-S cluster assembly. Similar to SufB. Involved in the regulation of iron homeostasis. Able to form homodimers. Interacts with AtNAP7 inside the chloroplast.                                                                                                                                                                          | 58.46   | 33.86   | 1.73 | 5.18E-04 | 1.93E-03 |
| 1856 | 3 | F2-3 vs. L2-3 | 254485_at  | AT4G20760 | NAD(P)-binding Rossmann-fold superfamily protein;(source:Araport11)                                                                                                                                                                                                                                                                                                                                                                       | 71.32   | 41.29   | 1.73 | 1.52E-04 | 7.88E-04 |
| 1857 | 3 | F2-3 vs. L2-3 | 250217_at  | AT5G14120 | Major facilitator superfamily protein;(source:Araport11)                                                                                                                                                                                                                                                                                                                                                                                  | 175.56  | 101.62  | 1.73 | 9.77E-05 | 5.77E-04 |
| 1858 | 3 | F2-3 vs. L2-3 | 248402_at  | AT5G52100 | Is essential for chloroplast NAD(P)H dehydrogenase activity, which is involved in electron transfer between PSII and PSI. Likely functions in biogenesis or stabilization of the NAD(P)H dehydrogenase complex. The mRNA is cell-to-cell mobile.                                                                                                                                                                                          | 36.10   | 20.92   | 1.73 | 1.06E-05 | 1.22E-04 |
| 1859 | 3 | F2-3 vs. L2-3 | 257375_at  | AT2G38640 | LURP-one-like protein (DUF567);(source:Araport11)                                                                                                                                                                                                                                                                                                                                                                                         | 20.85   | 12.15   | 1.72 | 3.04E-05 | 2.53E-04 |
| 1860 | 3 | F2-3 vs. L2-3 | 259231_at  | AT3G11410 | Encodes protein phosphatase 2C. Negative regulator of ABA signalling. Expressed in seeds during germination. mRNA up-regulated by drought and ABA.                                                                                                                                                                                                                                                                                        | 459.42  | 266.43  | 1.72 | 7.20E-06 | 9.51E-05 |
| 1861 | 3 | F2-3 vs. L2-3 | 254886_at  | AT4G11760 | Encodes a member of a family of small,secreted, cysteine rich protein with sequence similarity to the PCP (pollen coat protein) gene family.                                                                                                                                                                                                                                                                                              | 26.86   | 15.62   | 1.72 | 8.46E-05 | 5.24E-04 |
| 1862 | 3 | F2-3 vs. L2-3 | 254137_at  | AT4G24930 | thylakoid lumenal 17.9 kDa protein, chloroplast;(source:Araport11)                                                                                                                                                                                                                                                                                                                                                                        | 68.90   | 39.97   | 1.72 | 4.96E-04 | 1.87E-03 |
| 1863 | 3 | F2-3 vs. L2-3 | 248126_at  | AT5G54760 | Translation initiation factor SU11 family protein;(source:Araport11)                                                                                                                                                                                                                                                                                                                                                                      | 1807.25 | 1050.46 | 1.72 | 2.05E-04 | 9.74E-04 |

|      |   |               |            |           |                                                                                                                                                                                                                                                                                                                                                                                                                                                                                                                                                                                                                                                                                       |        |        |      |          |          |
|------|---|---------------|------------|-----------|---------------------------------------------------------------------------------------------------------------------------------------------------------------------------------------------------------------------------------------------------------------------------------------------------------------------------------------------------------------------------------------------------------------------------------------------------------------------------------------------------------------------------------------------------------------------------------------------------------------------------------------------------------------------------------------|--------|--------|------|----------|----------|
| 1864 | 3 | F2-3 vs. L2-3 | 247613_at  | AT5G60740 | ABC transporter family protein;(source:Araport11)<br>Tonoplast localized pH dependent, low affinity nitrogen transporter.In shoots, expressed in leaf veins and mesophyll. In roots, GUS activity was detected in root vascular stele. More highly expressed in roots.                                                                                                                                                                                                                                                                                                                                                                                                                | 29.76  | 17.34  | 1.72 | 3.31E-04 | 1.39E-03 |
| 1865 | 3 | F2-3 vs. L2-3 | 261924_at  | AT1G22550 | alpha/beta-Hydrolases superfamily protein;(source:Araport11)                                                                                                                                                                                                                                                                                                                                                                                                                                                                                                                                                                                                                          | 38.91  | 22.78  | 1.71 | 5.93E-04 | 2.13E-03 |
| 1866 | 3 | F2-3 vs. L2-3 | 252822_at  | AT4G39955 | Encodes a MYB transcription factor involved in regulating anther dehiscence as well as regulating cell death, and cuticle-related Botrytis immunity.                                                                                                                                                                                                                                                                                                                                                                                                                                                                                                                                  | 33.69  | 19.65  | 1.71 | 1.40E-04 | 7.43E-04 |
| 1867 | 3 | F2-3 vs. L2-3 | 258516_at  | AT3G06490 | Arabidopsis thaliana TCP family transcription factor. Regulated by miR319. Involved in heterochronic regulation of leaf differentiation.                                                                                                                                                                                                                                                                                                                                                                                                                                                                                                                                              | 20.65  | 12.14  | 1.70 | 1.16E-04 | 6.55E-04 |
| 1868 | 3 | F2-3 vs. L2-3 | 257267_at  | AT3G15030 | encodes a divergent member of calmodulin, which is an EF-hand family of Ca2+-binding proteins. This gene is expressed in leaves, flowers and siliques. The gene functionally complements yeast calmodulin 1 (CAM1) but only when selected against the plasmid harboring wild-type yeast sequences. Also the protein does not form a complex with a basic amphiphilic helical peptide in the presence of Ca2+ in vitro. Authors suggest that this gene may represent a Ca2+-binding sensor protein that interacts with a more limited set of target proteins than do more conventional CaM isoforms. Mutations in this gene alter plant responses to abiotic stress and abscisic acid. | 98.05  | 57.64  | 1.70 | 6.35E-04 | 2.25E-03 |
| 1869 | 3 | F2-3 vs. L2-3 | 252037_at  | AT3G51920 | Encodes pPLAIIbeta, a member of the Group 3 patatin-related phospholipases. pPLAIIbeta hydrolyzes phospholipids and galactolipids and additionally has acyl-CoA thioesterase activity. Alterations of pPLAII&#946; result in changes in lipid levels and composition.                                                                                                                                                                                                                                                                                                                                                                                                                 | 19.95  | 11.73  | 1.70 | 5.84E-05 | 4.05E-04 |
| 1870 | 3 | F2-3 vs. L2-3 | 251839_at  | AT3G54950 | Phosphofructokinase family protein;(source:Araport11)                                                                                                                                                                                                                                                                                                                                                                                                                                                                                                                                                                                                                                 | 137.06 | 80.79  | 1.70 | 2.09E-05 | 1.95E-04 |
| 1871 | 3 | F2-3 vs. L2-3 | 255365_at  | AT4G04040 | lactate/malate dehydrogenase family protein;(source:Araport11)                                                                                                                                                                                                                                                                                                                                                                                                                                                                                                                                                                                                                        | 681.89 | 401.12 | 1.70 | 9.64E-04 | 3.12E-03 |
| 1872 | 3 | F2-3 vs. L2-3 | 247813_at  | AT5G58330 | Member of the R2R3 factor MYB gene family involved in mediating plant responses to a variety of abiotic stimuli. The mRNA is cell-to-cell mobile.                                                                                                                                                                                                                                                                                                                                                                                                                                                                                                                                     | 580.97 | 342.54 | 1.70 | 7.97E-04 | 2.68E-03 |
| 1873 | 3 | F2-3 vs. L2-3 | 246987_at  | AT5G67300 | Ribose 5-phosphate isomerase, type A protein;(source:Araport11)                                                                                                                                                                                                                                                                                                                                                                                                                                                                                                                                                                                                                       | 463.63 | 273.15 | 1.70 | 1.73E-04 | 8.64E-04 |
| 1874 | 3 | F2-3 vs. L2-3 | 259098_at  | AT3G04790 | member of RAB gene family                                                                                                                                                                                                                                                                                                                                                                                                                                                                                                                                                                                                                                                             | 229.17 | 135.59 | 1.69 | 2.37E-04 | 1.08E-03 |
| 1875 | 3 | F2-3 vs. L2-3 | 245407_at  | AT4G17170 | MIZU-KUSSEI-like protein (Protein of unknown function, DUF617);(source:Araport11)                                                                                                                                                                                                                                                                                                                                                                                                                                                                                                                                                                                                     | 169.90 | 100.35 | 1.69 | 3.81E-04 | 1.54E-03 |
| 1876 | 3 | F2-3 vs. L2-3 | 249211_at  | AT5G42680 | photolyase/blue light photoreceptor PHR2 (PHR2) mRNA,                                                                                                                                                                                                                                                                                                                                                                                                                                                                                                                                                                                                                                 | 34.74  | 20.55  | 1.69 | 4.14E-04 | 1.63E-03 |
| 1877 | 3 | F2-3 vs. L2-3 | 245150_at  | AT2G47590 | Participates in the late stages of the biogenesis of 50S ribosomal subunits in plastids. serine/arginine repetitive matrix-like protein;(source:Araport11)                                                                                                                                                                                                                                                                                                                                                                                                                                                                                                                            | 57.50  | 34.28  | 1.68 | 3.84E-04 | 1.54E-03 |
| 1878 | 3 | F2-3 vs. L2-3 | 258135_at  | AT3G24506 | Type I phosphatidylinositol-4-phosphate 5-kinase. Preferentially phosphorylates PtdIns4P. Induced by water stress and abscisic acid in Arabidopsis thaliana. Expressed in procambial cells of leaves, flowers and roots. A N-terminal Membrane Occupation and Recognition Nexus (MORN)affects enzyme activity and distribution.                                                                                                                                                                                                                                                                                                                                                       | 51.21  | 30.42  | 1.68 | 3.14E-04 | 1.33E-03 |
| 1879 | 3 | F2-3 vs. L2-3 | 253455_at  | AT4G32020 | Encodes a GHMP kinase family protein that acts as a galacturonic acid-1-phosphate kinase that catalyzes the production of galacturonic acid-1-phosphate. This is a precursor of the important cell wall building block UDP-galacturonic acid. Based on gene trap line GT8007, the gene appears to be expressed in a petal and stamen-specific manner, between flower stages 8 to 11, however, later RT-qPCR analysis demonstrates that the transcript is present throughout the plant in all tissues tested.                                                                                                                                                                          | 135.91 | 80.92  | 1.68 | 2.13E-04 | 1.00E-03 |
| 1880 | 3 | F2-3 vs. L2-3 | 255959_at  | AT1G21980 | RmlC-like cupins superfamily protein;(source:Araport11)                                                                                                                                                                                                                                                                                                                                                                                                                                                                                                                                                                                                                               | 28.93  | 17.28  | 1.67 | 3.42E-04 | 1.42E-03 |
| 1881 | 3 | F2-3 vs. L2-3 | 265188_at  | AT1G23800 | Translation elongation factor EF1B/ribosomal protein S6 family protein;(source:Araport11)                                                                                                                                                                                                                                                                                                                                                                                                                                                                                                                                                                                             | 25.69  | 15.36  | 1.67 | 3.40E-04 | 1.41E-03 |
| 1882 | 3 | F2-3 vs. L2-3 | 261954_at  | AT1G64510 | Encodes a member of the DREB subfamily A-4 of ERF/AP2 transcription factor family. The protein contains one AP2 domain. There are 17 members in this subfamily including TINY.                                                                                                                                                                                                                                                                                                                                                                                                                                                                                                        | 29.11  | 17.47  | 1.67 | 1.23E-04 | 6.78E-04 |
| 1883 | 3 | F2-3 vs. L2-3 | 258766_at  | AT3G10700 | MBOAT (membrane bound O-acyl transferase) family protein;(source:Araport11)                                                                                                                                                                                                                                                                                                                                                                                                                                                                                                                                                                                                           | 31.18  | 18.63  | 1.67 | 7.46E-05 | 4.76E-04 |
| 1884 | 3 | F2-3 vs. L2-3 | 245373_s_a | AT4G14710 | cotton fiber protein;(source:Araport11)                                                                                                                                                                                                                                                                                                                                                                                                                                                                                                                                                                                                                                               | 182.90 | 109.78 | 1.67 | 1.43E-04 | 7.56E-04 |
| 1885 | 3 | F2-3 vs. L2-3 | 253405_at  | AT4G32800 |                                                                                                                                                                                                                                                                                                                                                                                                                                                                                                                                                                                                                                                                                       | 32.41  | 19.45  | 1.67 | 1.65E-04 | 8.35E-04 |
| 1886 | 3 | F2-3 vs. L2-3 | 248061_at  | AT5G55340 |                                                                                                                                                                                                                                                                                                                                                                                                                                                                                                                                                                                                                                                                                       | 47.72  | 28.64  | 1.67 | 6.81E-05 | 4.47E-04 |
| 1887 | 3 | F2-3 vs. L2-3 | 247539_at  | AT5G61710 |                                                                                                                                                                                                                                                                                                                                                                                                                                                                                                                                                                                                                                                                                       | 38.18  | 22.90  | 1.67 | 9.44E-05 | 5.62E-04 |

|      |   |               |            |           |                                                                                                                                                                                                                                                                                                                                                                                                                                                                                                                                                                                                                                                                                                                                                                  |        |        |      |          |          |
|------|---|---------------|------------|-----------|------------------------------------------------------------------------------------------------------------------------------------------------------------------------------------------------------------------------------------------------------------------------------------------------------------------------------------------------------------------------------------------------------------------------------------------------------------------------------------------------------------------------------------------------------------------------------------------------------------------------------------------------------------------------------------------------------------------------------------------------------------------|--------|--------|------|----------|----------|
| 1888 | 3 | F2-3 vs. L2-3 | 261788_at  | AT1G15980 | encodes a novel subunit of the chloroplast NAD(P)H dehydrogenase complex, involved in cyclic electron flow around photosystem I to produce ATP. Encodes a phosphoethanolamine N-methyltransferase that catalyses the last two methylation steps of the three sequential methylations of phosphoethanolamine (PEA) that are required for the synthesis of phosphocholine (PCho) in plants.                                                                                                                                                                                                                                                                                                                                                                        | 55.33  | 33.43  | 1.66 | 2.86E-04 | 1.25E-03 |
| 1889 | 3 | F2-3 vs. L2-3 | 261309_at  | AT1G48600 |                                                                                                                                                                                                                                                                                                                                                                                                                                                                                                                                                                                                                                                                                                                                                                  | 148.22 | 89.04  | 1.66 | 6.51E-05 | 4.35E-04 |
| 1890 | 3 | F2-3 vs. L2-3 | 267206_at  | AT2G30830 | encodes a protein whose sequence is similar to 2-oxoglutarate-dependent dioxygenase                                                                                                                                                                                                                                                                                                                                                                                                                                                                                                                                                                                                                                                                              | 26.68  | 16.04  | 1.66 | 1.72E-04 | 8.60E-04 |
| 1891 | 3 | F2-3 vs. L2-3 | 266395_at  | AT2G43100 | isopropylmalate isomerase 2;(source:Araport11)                                                                                                                                                                                                                                                                                                                                                                                                                                                                                                                                                                                                                                                                                                                   | 34.55  | 20.79  | 1.66 | 3.54E-04 | 1.45E-03 |
| 1892 | 3 | F2-3 vs. L2-3 | 252271_s_a | AT5G01430 | Got1/Sft2-like vesicle transport protein family;(source:Araport11)                                                                                                                                                                                                                                                                                                                                                                                                                                                                                                                                                                                                                                                                                               | 60.57  | 36.41  | 1.66 | 1.29E-04 | 7.05E-04 |
| 1893 | 3 | F2-3 vs. L2-3 | 247509_at  | AT5G62020 | member of Heat Stress Transcription Factor (Hsf) family The mRNA is cell-to-cell mobile. PYD3 encodes a beta-ureidopropionase which, when expressed in E. coli, has been shown to convert beta-ureidopropionate into beta-alanine. It localizes to the cytosol and plays an important role in uracil degradation.                                                                                                                                                                                                                                                                                                                                                                                                                                                | 93.69  | 56.56  | 1.66 | 7.73E-04 | 2.62E-03 |
| 1894 | 3 | F2-3 vs. L2-3 | 247275_at  | AT5G64370 |                                                                                                                                                                                                                                                                                                                                                                                                                                                                                                                                                                                                                                                                                                                                                                  | 152.49 | 91.76  | 1.66 | 8.41E-04 | 2.81E-03 |
| 1895 | 3 | F2-3 vs. L2-3 | 265821_at  | AT2G17950 | Homeobox gene controlling the stem cell pool. Expressed in the stem cell organizing center of meristems. Required to keep the stem cells in an undifferentiated state. Regulation of WUS transcription is a central checkpoint in stem cell control. The size of the WUS expression domain controls the size of the stem cell population through WUS indirectly activating the expression of CLAVATA3 (CLV3) in the stem cells and CLV3 repressing WUS transcription through the CLV1 receptor kinase signaling pathway. Repression of WUS transcription through AGAMOUS (AG) activity controls stem cell activity in the determinate floral meristem. Binds to TAAT element core motif. WUS is also involved in cell differentiation during anther development. | 18.03  | 10.94  | 1.65 | 2.59E-05 | 2.26E-04 |
| 1896 | 3 | F2-3 vs. L2-3 | 252085_s_a | AT3G52000 | serine carboxypeptidase-like 36;(source:Araport11)                                                                                                                                                                                                                                                                                                                                                                                                                                                                                                                                                                                                                                                                                                               | 16.63  | 10.11  | 1.65 | 1.57E-04 | 8.09E-04 |
| 1897 | 3 | F2-3 vs. L2-3 | 251704_at  | AT3G56360 | hypothetical protein;(source:Araport11)                                                                                                                                                                                                                                                                                                                                                                                                                                                                                                                                                                                                                                                                                                                          | 61.25  | 37.17  | 1.65 | 4.95E-05 | 3.59E-04 |
| 1898 | 3 | F2-3 vs. L2-3 | 253005_at  | AT4G38100 | CURVATURE THYLAKOID 1D-like protein; involved in thylakoid membrane organization.                                                                                                                                                                                                                                                                                                                                                                                                                                                                                                                                                                                                                                                                                | 33.28  | 20.17  | 1.65 | 2.38E-04 | 1.08E-03 |
| 1899 | 3 | F2-3 vs. L2-3 | 252911_at  | AT4G39510 | member of CYP96A                                                                                                                                                                                                                                                                                                                                                                                                                                                                                                                                                                                                                                                                                                                                                 | 62.29  | 37.84  | 1.65 | 3.53E-04 | 1.45E-03 |
| 1900 | 3 | F2-3 vs. L2-3 | 247553_at  | AT5G60910 | MADS box gene negatively regulated by APETALA1                                                                                                                                                                                                                                                                                                                                                                                                                                                                                                                                                                                                                                                                                                                   | 22.09  | 13.42  | 1.65 | 5.68E-05 | 3.98E-04 |
| 1901 | 3 | F2-3 vs. L2-3 | 265569_at  | AT2G05620 | Involved in electron flow in Photosystem I. Essential for photoprotection.                                                                                                                                                                                                                                                                                                                                                                                                                                                                                                                                                                                                                                                                                       | 45.62  | 27.77  | 1.64 | 7.57E-04 | 2.57E-03 |
| 1902 | 3 | F2-3 vs. L2-3 | 251465_at  | AT3G59360 | UDP-galactose transporter 6;(source:Araport11)                                                                                                                                                                                                                                                                                                                                                                                                                                                                                                                                                                                                                                                                                                                   | 67.54  | 41.21  | 1.64 | 1.16E-04 | 6.55E-04 |
| 1903 | 3 | F2-3 vs. L2-3 | 250137_at  | AT5G15390 | tRNA/rRNA methyltransferase (SpoU) family protein;(source:Araport11)                                                                                                                                                                                                                                                                                                                                                                                                                                                                                                                                                                                                                                                                                             | 170.64 | 104.00 | 1.64 | 7.24E-05 | 4.66E-04 |
| 1904 | 3 | F2-3 vs. L2-3 | 249910_at  | AT5G22630 | Encodes a plastid-localized arogenate dehydratase involved in phenylalanine biosynthesis. Not less than six genes encoding ADT were identified in the Arabidopsis genome: ADT1 [At1g11790]; ADT2 [At3g07630]; ADT3 [At2g27820]; ADT4 [At3g44720]; ADT5 [At5g22630]; and ADT6 [At1g08250]. The mRNA is cell-to-cell mobile.                                                                                                                                                                                                                                                                                                                                                                                                                                       | 49.79  | 30.39  | 1.64 | 4.89E-05 | 3.56E-04 |
| 1905 | 3 | F2-3 vs. L2-3 | 248028_at  | AT5G55620 | hypothetical protein;(source:Araport11)                                                                                                                                                                                                                                                                                                                                                                                                                                                                                                                                                                                                                                                                                                                          | 20.57  | 12.57  | 1.64 | 9.29E-04 | 3.03E-03 |
| 1906 | 3 | F2-3 vs. L2-3 | 261462_at  | AT1G07850 | transferring glycosyl group transferase (DUF604);(source:Araport11)                                                                                                                                                                                                                                                                                                                                                                                                                                                                                                                                                                                                                                                                                              | 37.92  | 23.30  | 1.63 | 2.38E-04 | 1.08E-03 |
| 1907 | 3 | F2-3 vs. L2-3 | 260637_at  | AT1G62380 | Encodes a protein similar to 1-aminocyclopropane-1-carboxylic oxidase (ACC oxidase). Expression of the AtACO2 transcripts is affected by ethylene.                                                                                                                                                                                                                                                                                                                                                                                                                                                                                                                                                                                                               | 217.44 | 133.30 | 1.63 | 7.20E-04 | 2.48E-03 |
| 1908 | 3 | F2-3 vs. L2-3 | 261727_at  | AT1G76090 | Encodes S-adenosyl-methionine-sterol-C-methyltransferase, an enzyme in the sterol biosynthetic pathway.                                                                                                                                                                                                                                                                                                                                                                                                                                                                                                                                                                                                                                                          | 58.61  | 35.96  | 1.63 | 5.00E-04 | 1.88E-03 |
| 1909 | 3 | F2-3 vs. L2-3 | 265494_at  | AT2G15680 | Encodes a calmodulin-like protein. Member of a diversely expressed predicted peptide family showing sequence similarity to tobacco Rapid Alkalinization Factor (RALF), and is believed to play an essential role in the physiology of Arabidopsis. Consists of a single exon and is characterized by a conserved C-terminal motif and N-terminal signal peptide.                                                                                                                                                                                                                                                                                                                                                                                                 | 20.60  | 12.64  | 1.63 | 3.30E-05 | 2.67E-04 |
| 1910 | 3 | F2-3 vs. L2-3 | 257821_at  | AT3G25170 |                                                                                                                                                                                                                                                                                                                                                                                                                                                                                                                                                                                                                                                                                                                                                                  | 37.51  | 23.07  | 1.63 | 4.56E-04 | 1.75E-03 |
| 1911 | 3 | F2-3 vs. L2-3 | 257790_at  | AT3G27090 | DCD (Development and Cell Death) domain protein;(source:Araport11)                                                                                                                                                                                                                                                                                                                                                                                                                                                                                                                                                                                                                                                                                               | 450.54 | 276.82 | 1.63 | 4.57E-04 | 1.75E-03 |
| 1912 | 3 | F2-3 vs. L2-3 | 254153_at  | AT4G24450 | phosphoglucan, water dikinase;(source:Araport11)                                                                                                                                                                                                                                                                                                                                                                                                                                                                                                                                                                                                                                                                                                                 | 35.87  | 22.06  | 1.63 | 1.22E-04 | 6.74E-04 |
| 1913 | 3 | F2-3 vs. L2-3 | 252886_at  | AT4G39350 | Encodes a cellulose synthase isomer, related to CESA6. As inferred from the null role of secondary wall-type CesAs, included in a set of five primary wall-type CesAs that may support trichome cell wall thickening. The mRNA is cell-to-cell mobile.                                                                                                                                                                                                                                                                                                                                                                                                                                                                                                           | 97.14  | 59.59  | 1.63 | 7.46E-04 | 2.54E-03 |
| 1914 | 3 | F2-3 vs. L2-3 | 249519_at  | AT5G38660 | mutant has Altered acclimation responses;                                                                                                                                                                                                                                                                                                                                                                                                                                                                                                                                                                                                                                                                                                                        | 157.13 | 96.43  | 1.63 | 2.63E-04 | 1.17E-03 |
| 1915 | 3 | F2-3 vs. L2-3 | 259891_at  | AT1G72730 | DEA(D/H)-box RNA helicase family protein;(source:Araport11)                                                                                                                                                                                                                                                                                                                                                                                                                                                                                                                                                                                                                                                                                                      | 106.71 | 66.04  | 1.62 | 8.73E-04 | 2.89E-03 |

|      |   |               |           |           |                                                                                                                                                                                                                                                                                                                                                                                                                                                                                                                                                                                                                                                                                                                                                                                                                                                                         |        |        |      |          |          |
|------|---|---------------|-----------|-----------|-------------------------------------------------------------------------------------------------------------------------------------------------------------------------------------------------------------------------------------------------------------------------------------------------------------------------------------------------------------------------------------------------------------------------------------------------------------------------------------------------------------------------------------------------------------------------------------------------------------------------------------------------------------------------------------------------------------------------------------------------------------------------------------------------------------------------------------------------------------------------|--------|--------|------|----------|----------|
| 1916 | 3 | F2-3 vs. L2-3 | 267147_at | AT2G38240 | One of 4 paralogs encoding a 2-oxoglutarate/Fe(II)-dependent oxygenases that hydroxylates JA to 12-OH-JA.                                                                                                                                                                                                                                                                                                                                                                                                                                                                                                                                                                                                                                                                                                                                                               | 42.91  | 26.53  | 1.62 | 5.66E-04 | 2.06E-03 |
| 1917 | 3 | F2-3 vs. L2-3 | 260572_at | AT2G43760 | molybdopterin biosynthesis MoaE family protein;(source:Araport11)                                                                                                                                                                                                                                                                                                                                                                                                                                                                                                                                                                                                                                                                                                                                                                                                       | 117.60 | 72.65  | 1.62 | 3.66E-05 | 2.88E-04 |
| 1918 | 3 | F2-3 vs. L2-3 | 258655_at | AT3G09810 | Encodes a catalytic subunit of the mitochondrially-localized NAD+- dependent isocitrate dehydrogenase                                                                                                                                                                                                                                                                                                                                                                                                                                                                                                                                                                                                                                                                                                                                                                   | 67.92  | 42.05  | 1.62 | 4.94E-04 | 1.86E-03 |
| 1919 | 3 | F2-3 vs. L2-3 | 251870_at | AT3G54510 | Early-responsive to dehydration stress protein (ERD4);(source:Araport11)                                                                                                                                                                                                                                                                                                                                                                                                                                                                                                                                                                                                                                                                                                                                                                                                | 26.71  | 16.51  | 1.62 | 4.45E-04 | 1.72E-03 |
| 1920 | 3 | F2-3 vs. L2-3 | 253402_at | AT4G32880 | member of homeodomain-leucine zipper family, acting as a differentiation-promoting transcription factor of the vascular meristems.                                                                                                                                                                                                                                                                                                                                                                                                                                                                                                                                                                                                                                                                                                                                      | 42.56  | 26.25  | 1.62 | 9.96E-05 | 5.85E-04 |
| 1921 | 3 | F2-3 vs. L2-3 | 248687_at | AT5G48300 | Encodes the small subunit of ADP-glucose pyrophosphorylase. The small subunit is the catalytic isoform responsible for ADP-glucose pyrophosphorylase activity. The presence of the small subunit is required for large subunit stability. Two isoforms of the small subunit (ApS1 and ApS2) have been described. ApS1 is the major small subunit isoform present in all plant tissues tested. The mRNA is cell-to-cell mobile.                                                                                                                                                                                                                                                                                                                                                                                                                                          | 94.16  | 58.05  | 1.62 | 2.45E-05 | 2.17E-04 |
| 1922 | 3 | F2-3 vs. L2-3 | 264645_at | AT1G08940 | Phosphoglycerate mutase family protein;(source:Araport11)                                                                                                                                                                                                                                                                                                                                                                                                                                                                                                                                                                                                                                                                                                                                                                                                               | 22.84  | 14.15  | 1.61 | 2.58E-05 | 2.25E-04 |
| 1923 | 3 | F2-3 vs. L2-3 | 256506_at | AT1G75160 | DUF620 family protein (DUF620);(source:Araport11)                                                                                                                                                                                                                                                                                                                                                                                                                                                                                                                                                                                                                                                                                                                                                                                                                       | 19.28  | 12.01  | 1.61 | 7.46E-04 | 2.54E-03 |
| 1924 | 3 | F2-3 vs. L2-3 | 267458_at | AT2G33670 | A member of a large family of seven-transmembrane domain proteins specific to plants, homologs of the barley mildew resistance locus o (MLO) protein. The Arabidopsis genome contains 15 genes encoding MLO proteins, with localization in plasma membrane. Phylogenetic analysis revealed four clades of closely-related AtMLO genes. ATMLO5 belongs to the clade III, with AtMLO7, AtMLO8, AtMLO9, and AtMLO10. The gene is expressed during seedling growth, in cotyledon vascular system, and in stigma, anther and pollen grains; it was not expressed in rosette leaves, as shown by GUS activity patterns. The expression of several phylogenetically closely-related AtMLO genes showed similar or overlapping tissue specificity and analogous responsiveness to external stimuli, suggesting functional redundancy, co-function, or antagonistic function(s). | 24.07  | 14.96  | 1.61 | 5.09E-04 | 1.91E-03 |
| 1925 | 3 | F2-3 vs. L2-3 | 266965_at | AT2G39510 | Encodes a plasma membrane-localized amino acid transporter likely involved in amino acid export in the developing seed.                                                                                                                                                                                                                                                                                                                                                                                                                                                                                                                                                                                                                                                                                                                                                 | 78.95  | 49.04  | 1.61 | 1.77E-04 | 8.80E-04 |
| 1926 | 3 | F2-3 vs. L2-3 | 265721_at | AT2G40090 | member of ATH subfamily                                                                                                                                                                                                                                                                                                                                                                                                                                                                                                                                                                                                                                                                                                                                                                                                                                                 | 30.97  | 19.22  | 1.61 | 1.54E-04 | 7.98E-04 |
| 1927 | 3 | F2-3 vs. L2-3 | 259173_at | AT3G03640 | Encodes beta-glucosidase (GLUC).                                                                                                                                                                                                                                                                                                                                                                                                                                                                                                                                                                                                                                                                                                                                                                                                                                        | 27.85  | 17.28  | 1.61 | 1.82E-04 | 8.87E-04 |
| 1928 | 3 | F2-3 vs. L2-3 | 256900_at | AT3G24670 | Pectin lyase-like superfamily protein;(source:Araport11)                                                                                                                                                                                                                                                                                                                                                                                                                                                                                                                                                                                                                                                                                                                                                                                                                | 59.96  | 37.22  | 1.61 | 6.34E-04 | 2.25E-03 |
| 1929 | 3 | F2-3 vs. L2-3 | 255417_at | AT4G03190 | Encodes an F box protein belonging to the TIR1 subfamily. This protein forms SCF complexes with ASK1 and CUL1 and interacts with Aux/IAA proteins in an auxin-dependent manner. It also has sequence similarity to the yeast protein GRR1, which is involved in glucose repression.                                                                                                                                                                                                                                                                                                                                                                                                                                                                                                                                                                                     | 43.63  | 27.10  | 1.61 | 1.43E-04 | 7.56E-04 |
| 1930 | 3 | F2-3 vs. L2-3 | 253485_at | AT4G31800 | Pathogen-induced transcription factor. Binds W-box sequences in vitro. Forms protein complexes with itself and with WRKY40 and WRKY60. Constitutive expression of WRKY18 enhanced resistance to P. syringae, but its coexpression with WRKY40 or WRKY60 made plants more susceptible to both P. syringae and B. cinerea. WRKY18, WRKY40, and WRKY60 have partially redundant roles in response to the hemibiotrophic bacterial pathogen Pseudomonas syringae and the necrotrophic fungal pathogen Botrytis cinerea, with WRKY18 playing a more important role than the other two.The mRNA is cell-to-cell mobile.                                                                                                                                                                                                                                                       | 42.00  | 26.07  | 1.61 | 5.56E-04 | 2.04E-03 |
| 1931 | 3 | F2-3 vs. L2-3 | 250829_at | AT5G04720 | Encodes a member of the ADR1 family nucleotide-binding leucine-rich repeat (NB-LRR) immune receptors. The mRNA is cell-to-cell mobile.                                                                                                                                                                                                                                                                                                                                                                                                                                                                                                                                                                                                                                                                                                                                  | 24.52  | 15.23  | 1.61 | 5.80E-04 | 2.10E-03 |
| 1932 | 3 | F2-3 vs. L2-3 | 250580_at | AT5G07440 | Encodes the alpha-subunit of the glutamate dehydrogenase. The enzyme is almost exclusively found in the mitochondria of stem and leaf companion cells.                                                                                                                                                                                                                                                                                                                                                                                                                                                                                                                                                                                                                                                                                                                  | 17.40  | 10.84  | 1.61 | 7.81E-05 | 4.93E-04 |
| 1933 | 3 | F2-3 vs. L2-3 | 246539_at | AT5G15460 | membrane-anchored ubiquitin-fold protein 2;(source:Araport11)                                                                                                                                                                                                                                                                                                                                                                                                                                                                                                                                                                                                                                                                                                                                                                                                           | 130.18 | 80.85  | 1.61 | 1.89E-04 | 9.14E-04 |
| 1934 | 3 | F2-3 vs. L2-3 | 249751_at | AT5G24650 | HP30/Tric1 is a component of the mitochondrial protein translocation complex and is involved in tRNA transport along with HP30-2/Tric2.It interacts with several members of the TOM complex such as TOM40 and this interaction is mediated by the SAM domain.                                                                                                                                                                                                                                                                                                                                                                                                                                                                                                                                                                                                           | 227.28 | 141.15 | 1.61 | 3.46E-05 | 2.76E-04 |

|      |   |               |           |           |                                                                                                                                                                                                                                                                                                                                                                                                                                                                                                                         |        |        |      |          |          |
|------|---|---------------|-----------|-----------|-------------------------------------------------------------------------------------------------------------------------------------------------------------------------------------------------------------------------------------------------------------------------------------------------------------------------------------------------------------------------------------------------------------------------------------------------------------------------------------------------------------------------|--------|--------|------|----------|----------|
|      |   |               |           |           | Encodes ZFHD2, a member of the zinc finger homeodomain transcriptional factor family. Gain of function of ATHB25 (35S and UBQ10 promoters) and double loss of function of ATHB25 and ATHB22 increases and decreases, respectively, seed longevity. This phenotype is maternal and related to seed coat alterations. Gain of function increases expression of GA3OX2 and GA4 and GA1 levels.                                                                                                                             |        |        |      |          |          |
| 1935 | 3 | F2-3 vs. L2-3 | 247182_at | AT5G65410 |                                                                                                                                                                                                                                                                                                                                                                                                                                                                                                                         | 67.45  | 41.98  | 1.61 | 4.70E-04 | 1.79E-03 |
| 1936 | 3 | F2-3 vs. L2-3 | 262418_at | AT1G50320 | encodes a prokaryotic thioredoxin                                                                                                                                                                                                                                                                                                                                                                                                                                                                                       | 136.08 | 84.97  | 1.60 | 6.45E-05 | 4.33E-04 |
| 1937 | 3 | F2-3 vs. L2-3 | 266368_at | AT2G41380 | S-adenosyl-L-methionine-dependent methyltransferases superfamily protein;(source:Ararport11)                                                                                                                                                                                                                                                                                                                                                                                                                            | 19.86  | 12.38  | 1.60 | 1.48E-05 | 1.57E-04 |
| 1938 | 3 | F2-3 vs. L2-3 | 257696_at | AT3G12690 | Encodes a putative serine/threonine kinase It is expressed specifically in pollen and appears to function redundantly with AGC1.7 to regulate polarized growth of pollen tubes. LAC17 appears to have laccase activity based on enzyme assays performed using lac17 mutants. Notably, these mutants appear to have a reduced deposition of G lignin units. LAC17 is expressed in interfascicular fibers and likely contributes to lignin biosynthesis, and hence, cell wall biosynthesis, there.                        | 133.94 | 83.89  | 1.60 | 1.56E-04 | 8.05E-04 |
| 1939 | 3 | F2-3 vs. L2-3 | 247648_at | AT5G60020 |                                                                                                                                                                                                                                                                                                                                                                                                                                                                                                                         | 48.54  | 30.38  | 1.60 | 1.01E-04 | 5.92E-04 |
| 1940 | 3 | F2-3 vs. L2-3 | 247523_at | AT5G61410 | Arabidopsis thaliana ribulose-5-phosphate-3-epimerase mRNA                                                                                                                                                                                                                                                                                                                                                                                                                                                              | 391.94 | 245.44 | 1.60 | 7.93E-05 | 4.98E-04 |
| 1941 | 3 | F2-3 vs. L2-3 | 262744_at | AT1G28680 | Catalyses trans-cis isomerization and lactonization in the biosynthesis of coumarins in roots.                                                                                                                                                                                                                                                                                                                                                                                                                          | 83.45  | 52.44  | 1.59 | 9.89E-04 | 3.19E-03 |
| 1942 | 3 | F2-3 vs. L2-3 | 262165_at | AT1G75020 | lysophosphatidyl acyltransferase 4;(source:Ararport11)                                                                                                                                                                                                                                                                                                                                                                                                                                                                  | 25.22  | 15.88  | 1.59 | 4.57E-04 | 1.75E-03 |
| 1943 | 3 | F2-3 vs. L2-3 | 262970_at | AT1G75690 | Thylakoid Thiol/Disulfide-Modulating Protein.                                                                                                                                                                                                                                                                                                                                                                                                                                                                           | 123.93 | 77.79  | 1.59 | 4.05E-04 | 1.61E-03 |
| 1944 | 3 | F2-3 vs. L2-3 | 245076_at | AT2G23170 | encodes an IAA-amido synthase that conjugates Asp and other amino acids to auxin in vitro.                                                                                                                                                                                                                                                                                                                                                                                                                              | 31.31  | 19.73  | 1.59 | 1.29E-04 | 7.07E-04 |
| 1945 | 3 | F2-3 vs. L2-3 | 265959_at | AT2G37240 | Thioredoxin superfamily protein;(source:Ararport11)                                                                                                                                                                                                                                                                                                                                                                                                                                                                     | 105.98 | 66.65  | 1.59 | 8.71E-04 | 2.88E-03 |
| 1946 | 3 | F2-3 vs. L2-3 | 257892_at | AT3G17020 | Adenine nucleotide alpha hydrolases-like superfamily protein;(source:Ararport11)                                                                                                                                                                                                                                                                                                                                                                                                                                        | 930.20 | 584.24 | 1.59 | 3.55E-04 | 1.46E-03 |
| 1947 | 3 | F2-3 vs. L2-3 | 248754_at | AT5G47670 | Encodes LEC1-Like (L1L), closely related to LEC1 (Leafy Cotyledon1). Functions as a regulator of embryo development.                                                                                                                                                                                                                                                                                                                                                                                                    | 29.64  | 18.59  | 1.59 | 2.74E-04 | 1.21E-03 |
| 1948 | 3 | F2-3 vs. L2-3 | 259753_at | AT1G71050 | Heavy metal transport/detoxification superfamily protein;(source:Ararport11)                                                                                                                                                                                                                                                                                                                                                                                                                                            | 60.46  | 38.29  | 1.58 | 8.45E-05 | 5.24E-04 |
| 1949 | 3 | F2-3 vs. L2-3 | 262892_at | AT1G79440 | Encodes a mitochondrial succinic semialdehyde dehydrogenase (SSADH). Nomenclature according to Kirch, et al (2004).                                                                                                                                                                                                                                                                                                                                                                                                     | 173.96 | 110.31 | 1.58 | 5.40E-04 | 1.99E-03 |
| 1950 | 3 | F2-3 vs. L2-3 | 265530_at | AT2G06050 | Encodes a 12-oxophytodienoate reductase that is required for jasmonate biosynthesis. Mutants are male sterile and defective in pollen dehiscence. Shows activity towards 2,4,6-trinitrotoluene. CFA-Ile, CFA-Leu, CFA-Val, CFA-Met and CFA-Ala can restore the fertility of opr3 plants by inducing filament elongation and anther dehiscence.                                                                                                                                                                          | 348.70 | 220.56 | 1.58 | 1.16E-04 | 6.55E-04 |
| 1951 | 3 | F2-3 vs. L2-3 | 266428_at | AT2G07180 | Protein kinase superfamily protein;(source:Ararport11)                                                                                                                                                                                                                                                                                                                                                                                                                                                                  | 37.27  | 23.56  | 1.58 | 2.18E-04 | 1.02E-03 |
| 1952 | 3 | F2-3 vs. L2-3 | 266805_at | AT2G30010 | Encodes a member of the TBL (TRICHOME BIREFRINGENCE-LIKE) gene family containing a plant-specific DUF231 (domain of unknown function) domain. TBL gene family has 46 members, two of which (TBR/AT5G06700 and TBL3/AT5G01360) have been shown to be involved in the synthesis and deposition of secondary wall cellulose, presumably by influencing the esterification state of pectic polymers. A nomenclature for this gene family has been proposed (Volker Bischoff & Wolf Scheible, 2010, personal communication). | 38.35  | 24.21  | 1.58 | 5.24E-04 | 1.95E-03 |
| 1953 | 3 | F2-3 vs. L2-3 | 267527_at | AT2G45610 | alpha/beta-Hydrolases superfamily protein;(source:Ararport11)                                                                                                                                                                                                                                                                                                                                                                                                                                                           | 29.62  | 18.70  | 1.58 | 3.15E-04 | 1.33E-03 |
| 1954 | 3 | F2-3 vs. L2-3 | 258888_at | AT3G05620 | Plant invertase/pectin methylesterase inhibitor superfamily;(source:Ararport11)                                                                                                                                                                                                                                                                                                                                                                                                                                         | 22.96  | 14.49  | 1.58 | 1.34E-04 | 7.21E-04 |
| 1955 | 3 | F2-3 vs. L2-3 | 250385_at | AT5G11520 | Encodes the chloroplastic isozyme of aspartate aminotransferase. Involved in aspartate biosynthesis and nitrogen metabolism. mRNA is expressed in senescing leaves.                                                                                                                                                                                                                                                                                                                                                     | 133.46 | 84.46  | 1.58 | 5.97E-05 | 4.12E-04 |
| 1956 | 3 | F2-3 vs. L2-3 | 250103_at | AT5G16600 | Encodes a putative transcription factor (MYB43).                                                                                                                                                                                                                                                                                                                                                                                                                                                                        | 19.07  | 12.05  | 1.58 | 5.07E-05 | 3.65E-04 |
| 1957 | 3 | F2-3 vs. L2-3 | 247980_at | AT5G56860 | Encodes a member of the GATA factor family of zinc finger transcription factors. Modulate chlorophyll biosynthesis and glutamate synthase (GLU1/Fd-GOGAT) expression.                                                                                                                                                                                                                                                                                                                                                   | 21.83  | 13.79  | 1.58 | 3.63E-04 | 1.48E-03 |
| 1958 | 3 | F2-3 vs. L2-3 | 258501_at | AT3G06780 | glycine-rich protein;(source:Ararport11)                                                                                                                                                                                                                                                                                                                                                                                                                                                                                | 152.32 | 96.81  | 1.57 | 1.05E-04 | 6.09E-04 |
| 1959 | 3 | F2-3 vs. L2-3 | 253372_at | AT4G33220 | pectin methylesterase 44;(source:Ararport11)                                                                                                                                                                                                                                                                                                                                                                                                                                                                            | 265.61 | 169.63 | 1.57 | 1.90E-04 | 9.18E-04 |
| 1960 | 3 | F2-3 vs. L2-3 | 248042_at | AT5G55960 | transmembrane protein C9orf5 protein;(source:Ararport11)                                                                                                                                                                                                                                                                                                                                                                                                                                                                | 48.91  | 31.10  | 1.57 | 2.48E-04 | 1.12E-03 |
| 1961 | 3 | F2-3 vs. L2-3 | 247286_at | AT5G64280 | dicarboxylate transporter 2.2;(source:Ararport11)                                                                                                                                                                                                                                                                                                                                                                                                                                                                       | 89.53  | 56.89  | 1.57 | 2.94E-04 | 1.27E-03 |



|      |   |               |           |           |                                                                                                                                                                                                                                                                                                                                                                                                                                                                                                                                                                                                                                                                                        |         |         |      |          |          |
|------|---|---------------|-----------|-----------|----------------------------------------------------------------------------------------------------------------------------------------------------------------------------------------------------------------------------------------------------------------------------------------------------------------------------------------------------------------------------------------------------------------------------------------------------------------------------------------------------------------------------------------------------------------------------------------------------------------------------------------------------------------------------------------|---------|---------|------|----------|----------|
|      |   |               |           |           | Belongs to a large family of putative transcriptional activators with NAC domain. Transcript level increases in response to wounding and abscisic acid. ATAF1 attenuates ABA signaling and synthesis. Mutants are hyposensitive to ABA. The mRNA is cell-to-cell mobile.                                                                                                                                                                                                                                                                                                                                                                                                               | 134.17  | 86.21   | 1.56 | 2.15E-04 | 1.00E-03 |
| 1962 | 3 | F2-3 vs. L2-3 | 261564_at | AT1G01720 | putative sn-glycerol-3-phosphate 2-O-acyltransferase                                                                                                                                                                                                                                                                                                                                                                                                                                                                                                                                                                                                                                   | 28.67   | 18.36   | 1.56 | 5.51E-04 | 2.02E-03 |
| 1963 | 3 | F2-3 vs. L2-3 | 259418_at | AT1G02390 | NAD(P)-binding Rossmann-fold superfamily protein;(source:Araport11)                                                                                                                                                                                                                                                                                                                                                                                                                                                                                                                                                                                                                    | 39.65   | 25.44   | 1.56 | 7.75E-04 | 2.62E-03 |
| 1964 | 3 | F2-3 vs. L2-3 | 252167_at | AT3G50560 | Transcription factor jumonji (jmc) domain-containing protein;(source:Araport11)                                                                                                                                                                                                                                                                                                                                                                                                                                                                                                                                                                                                        | 38.80   | 25.04   | 1.55 | 9.84E-04 | 3.18E-03 |
| 1965 | 3 | F2-3 vs. L2-3 | 264390_at | AT1G11950 | glutathione peroxidase GPx                                                                                                                                                                                                                                                                                                                                                                                                                                                                                                                                                                                                                                                             | 101.87  | 65.57   | 1.55 | 3.19E-04 | 1.35E-03 |
| 1966 | 3 | F2-3 vs. L2-3 | 263426_at | AT2G31570 | ARM repeat superfamily protein;(source:Araport11)                                                                                                                                                                                                                                                                                                                                                                                                                                                                                                                                                                                                                                      | 104.95  | 67.61   | 1.55 | 1.24E-04 | 6.83E-04 |
| 1967 | 3 | F2-3 vs. L2-3 | 258954_at | AT3G01400 | RHOMBOID-like protein 14;(source:Araport11)                                                                                                                                                                                                                                                                                                                                                                                                                                                                                                                                                                                                                                            | 138.89  | 89.68   | 1.55 | 4.62E-04 | 1.76E-03 |
| 1968 | 3 | F2-3 vs. L2-3 | 258406_at | AT3G17611 | DNAJ heat shock family protein;(source:Araport11)                                                                                                                                                                                                                                                                                                                                                                                                                                                                                                                                                                                                                                      | 82.91   | 53.36   | 1.55 | 2.94E-04 | 1.27E-03 |
| 1969 | 3 | F2-3 vs. L2-3 | 252394_at | AT3G47940 | Major facilitator superfamily protein;(source:Araport11)                                                                                                                                                                                                                                                                                                                                                                                                                                                                                                                                                                                                                               | 48.70   | 31.46   | 1.55 | 3.27E-04 | 1.37E-03 |
| 1970 | 3 | F2-3 vs. L2-3 | 253215_at | AT4G34950 | member of EXPANSIN-LIKE. Naming convention from the Expansin Working Group (Kende et al, 2004. Plant Mol Bio)                                                                                                                                                                                                                                                                                                                                                                                                                                                                                                                                                                          | 92.25   | 59.41   | 1.55 | 8.93E-04 | 2.94E-03 |
| 1971 | 3 | F2-3 vs. L2-3 | 252997_at | AT4G38400 | Homolog of PIP1.                                                                                                                                                                                                                                                                                                                                                                                                                                                                                                                                                                                                                                                                       | 28.00   | 18.21   | 1.54 | 4.34E-04 | 1.69E-03 |
| 1972 | 3 | F2-3 vs. L2-3 | 259809_at | AT1G49800 | jacalin-related lectin 23;(source:Araport11)                                                                                                                                                                                                                                                                                                                                                                                                                                                                                                                                                                                                                                           | 1941.91 | 1260.78 | 1.54 | 6.24E-04 | 2.23E-03 |
| 1973 | 3 | F2-3 vs. L2-3 | 266989_at | AT2G39330 |                                                                                                                                                                                                                                                                                                                                                                                                                                                                                                                                                                                                                                                                                        |         |         |      |          |          |
|      |   |               |           |           | Encodes a protein with phosphatidylinositol-4-phosphate 5-kinase activity that plays a role in pollen tip growth. The enzyme localizes to the apical plasma membrane and adjacent cytosolic region of pollen tubes. Overexpression of this gene leads to increased deposition of pectin in the cell wall at the tip of the pollen tube and causes altered pollen tube morphology.                                                                                                                                                                                                                                                                                                      | 29.02   | 18.88   | 1.54 | 1.19E-04 | 6.64E-04 |
| 1974 | 3 | F2-3 vs. L2-3 | 267081_at | AT2G41210 | HXXXD-type acyl-transferase family protein;(source:Araport11)                                                                                                                                                                                                                                                                                                                                                                                                                                                                                                                                                                                                                          | 28.15   | 18.38   | 1.53 | 5.25E-04 | 1.95E-03 |
| 1975 | 3 | F2-3 vs. L2-3 | 256492_at | AT1G31490 | Sulfite exporter TauE/SafE family protein;(source:Araport11)                                                                                                                                                                                                                                                                                                                                                                                                                                                                                                                                                                                                                           | 64.32   | 41.91   | 1.53 | 9.41E-05 | 5.62E-04 |
| 1976 | 3 | F2-3 vs. L2-3 | 264424_at | AT1G61740 |                                                                                                                                                                                                                                                                                                                                                                                                                                                                                                                                                                                                                                                                                        |         |         |      |          |          |
|      |   |               |           |           | One of the Major Intrinsic Proteins(MIPs) which facilitate the passive transport of small molecules across membranes.Belongs to a family of plant aquaporins.Similar to yeast and radish aquaporins. Located on ER. Probably involved in the alleviation of ER stress; the lack of SIP2;1 reduces both pollen germination and pollen tube elongation.                                                                                                                                                                                                                                                                                                                                  | 107.55  | 70.40   | 1.53 | 5.33E-04 | 1.97E-03 |
| 1977 | 3 | F2-3 vs. L2-3 | 251661_at | AT3G56950 |                                                                                                                                                                                                                                                                                                                                                                                                                                                                                                                                                                                                                                                                                        |         |         |      |          |          |
| 1978 | 3 | F2-3 vs. L2-3 | 245631_at | AT1G25350 | glutamine-tRNA ligase, putative / glutaminyl-tRNA synthetase, putative / GlnRS;(source:Araport11)                                                                                                                                                                                                                                                                                                                                                                                                                                                                                                                                                                                      | 66.18   | 43.41   | 1.52 | 7.44E-04 | 2.54E-03 |
| 1979 | 3 | F2-3 vs. L2-3 | 262283_at | AT1G68590 | Ribosomal protein PSRP-3/Ycf65;(source:Araport11)                                                                                                                                                                                                                                                                                                                                                                                                                                                                                                                                                                                                                                      | 25.41   | 16.74   | 1.52 | 7.11E-04 | 2.46E-03 |
| 1980 | 3 | F2-3 vs. L2-3 | 263880_at | AT2G21960 | transmembrane protein;(source:Araport11)                                                                                                                                                                                                                                                                                                                                                                                                                                                                                                                                                                                                                                               | 69.25   | 45.53   | 1.52 | 1.16E-04 | 6.55E-04 |
|      |   |               |           |           | GDSL-motif esterase/acyltransferase/lipase. Enzyme group with broad substrate specificity that may catalyze acyltransfer or hydrolase reactions with lipid and non-lipid substrates. The mRNA is cell-to-cell mobile.                                                                                                                                                                                                                                                                                                                                                                                                                                                                  | 222.12  | 146.19  | 1.52 | 1.48E-04 | 7.71E-04 |
| 1981 | 3 | F2-3 vs. L2-3 | 259375_at | AT3G16370 | NAD(P)-binding Rossmann-fold superfamily protein;(source:Araport11)                                                                                                                                                                                                                                                                                                                                                                                                                                                                                                                                                                                                                    | 36.38   | 24.01   | 1.52 | 7.11E-04 | 2.46E-03 |
| 1982 | 3 | F2-3 vs. L2-3 | 254468_at | AT4G20460 | purple acid phosphatase 24;(source:Araport11)                                                                                                                                                                                                                                                                                                                                                                                                                                                                                                                                                                                                                                          | 29.35   | 19.25   | 1.52 | 6.16E-05 | 4.21E-04 |
| 1983 | 3 | F2-3 vs. L2-3 | 254111_at | AT4G24890 |                                                                                                                                                                                                                                                                                                                                                                                                                                                                                                                                                                                                                                                                                        |         |         |      |          |          |
| 1984 | 3 | F2-3 vs. L2-3 | 250650_at | AT5G06850 | Encodes an endoplasmic reticulum protein that is involved in the transport of the florigen FT from companion cells to sieve elements, thus affecting FT transport through the phloem to the SAM.                                                                                                                                                                                                                                                                                                                                                                                                                                                                                       | 46.46   | 30.59   | 1.52 | 5.59E-04 | 2.04E-03 |
| 1985 | 3 | F2-3 vs. L2-3 | 247843_at | AT5G58050 | Encodes a member of the glycerophosphodiester phosphodiesterase like (GDPD-like) family.                                                                                                                                                                                                                                                                                                                                                                                                                                                                                                                                                                                               | 70.57   | 46.57   | 1.52 | 2.08E-04 | 9.86E-04 |
|      |   |               |           |           | Encodes a chloroplast-localized hydroxy-2-methyl-2-(E)-butenyl 4-diphosphate (HMBPP) synthase (HDS), catalyzes the formation of HMBPP from 2-C-methyl-D-erythritol 2,4-cyclodiphosphate (MEcPP). The HDS enzyme controls the penultimate steps of the biosynthesis of IPP and dimethylallyl diphosphate (DMAPP) via the MEP pathway and may serve as a metabolic control point for SA-mediated disease resistance. In the light, the electrons required for the reaction catalyzed by HDS are directly provided by the electron flow from photosynthesis via ferredoxin. In the dark however, the enzyme requires an electron shuttle: ferredoxin-NADP <sup>+</sup> →NADP <sup>+</sup> |         |         |      |          |          |
| 1986 | 3 | F2-3 vs. L2-3 | 247637_at | AT5G60600 | reductase. The mRNA is cell-to-cell mobile.                                                                                                                                                                                                                                                                                                                                                                                                                                                                                                                                                                                                                                            | 22.93   | 15.13   | 1.52 | 9.66E-04 | 3.13E-03 |
| 1987 | 3 | F2-3 vs. L2-3 | 259886_at | AT1G76370 | Protein kinase superfamily protein;(source:Araport11)                                                                                                                                                                                                                                                                                                                                                                                                                                                                                                                                                                                                                                  | 33.09   | 21.94   | 1.51 | 4.79E-04 | 1.81E-03 |
| 1988 | 3 | F2-3 vs. L2-3 | 245506_at | AT4G15700 | Encodes a member of the CC-type glutaredoxin (ROXY) family.                                                                                                                                                                                                                                                                                                                                                                                                                                                                                                                                                                                                                            | 14.71   | 9.71    | 1.51 | 1.18E-04 | 6.62E-04 |
|      |   |               |           |           | Encodes profilin2, a low-molecular weight, actin monomer-binding protein that regulates the organization of actin cytoskeleton. Expressed in vegetative organs. The first intron of PRF2 enhances gene expression. The mRNA is cell-to-cell mobile.                                                                                                                                                                                                                                                                                                                                                                                                                                    | 627.72  | 415.11  | 1.51 | 4.38E-04 | 1.70E-03 |
| 1989 | 3 | F2-3 vs. L2-3 | 253727_at | AT4G29350 |                                                                                                                                                                                                                                                                                                                                                                                                                                                                                                                                                                                                                                                                                        |         |         |      |          |          |

|      |   |               |           |           |                                                                                                                                                                                                                                                                                                                                                                                    |         |         |      |          |          |
|------|---|---------------|-----------|-----------|------------------------------------------------------------------------------------------------------------------------------------------------------------------------------------------------------------------------------------------------------------------------------------------------------------------------------------------------------------------------------------|---------|---------|------|----------|----------|
| 1990 | 3 | F2-3 vs. L2-3 | 250496_at | AT5G09650 | Encodes a protein with inorganic pyrophosphatase activity.                                                                                                                                                                                                                                                                                                                         | 262.11  | 173.87  | 1.51 | 3.12E-04 | 1.33E-03 |
| 1991 | 3 | F2-3 vs. L2-3 | 261563_at | AT1G01630 | Sec14p-like phosphatidylinositol transfer family protein;(source:Araport11)                                                                                                                                                                                                                                                                                                        | 49.65   | 33.07   | 1.50 | 3.96E-04 | 1.58E-03 |
| 1992 | 3 | F2-3 vs. L2-3 | 245763_at | AT1G27850 | Encodes a microtubule-associated protein involved in cortical microtubule organization during leaf development.                                                                                                                                                                                                                                                                    | 41.81   | 28.09   | 1.49 | 1.34E-04 | 7.21E-04 |
| 1993 | 3 | F2-3 vs. L2-3 | 245737_at | AT1G44160 | HSP40/DnaJ peptide-binding protein;(source:Araport11)                                                                                                                                                                                                                                                                                                                              | 20.27   | 13.62   | 1.49 | 6.38E-05 | 4.30E-04 |
| 1994 | 3 | F2-3 vs. L2-3 | 265401_at | AT2G10970 | Plant invertase/pectin methylesterase inhibitor superfamily protein;(source:Araport11)                                                                                                                                                                                                                                                                                             | 24.67   | 16.59   | 1.49 | 9.02E-04 | 2.97E-03 |
| 1995 | 3 | F2-3 vs. L2-3 | 263456_at | AT2G22125 | Encodes a protein involved in cell elongation in root and anther filaments. Mutants have greater cell volumes in root tissues and have additive phenotypes with other cell expansion mutants such as those carrying mutations in COB, QUI and POM1 loci. POM2/CSI1 promotes Cellulose Synthase and microtubule co-alignment. The mRNA is cell-to-cell mobile.                      | 65.32   | 43.87   | 1.49 | 8.13E-04 | 2.73E-03 |
| 1996 | 3 | F2-3 vs. L2-3 | 258087_at | AT3G26060 | encodes periredoxin Q which decomposes peroxides and plays a role in the protection of the photosynthetic apparatus                                                                                                                                                                                                                                                                | 170.54  | 114.53  | 1.49 | 9.72E-04 | 3.15E-03 |
| 1997 | 3 | F2-3 vs. L2-3 | 257850_at | AT3G13065 | STRUBBELIG-receptor family 4;(source:Araport11)                                                                                                                                                                                                                                                                                                                                    | 20.94   | 14.11   | 1.48 | 7.81E-04 | 2.63E-03 |
| 1998 | 3 | F2-3 vs. L2-3 | 248765_at | AT5G47650 | Encodes an ADP-ribose pyrophosphatase that confers enhanced tolerance to oxidative stress.                                                                                                                                                                                                                                                                                         | 59.61   | 40.20   | 1.48 | 6.64E-04 | 2.33E-03 |
| 1999 | 3 | F2-3 vs. L2-3 | 261451_at | AT1G21060 | Serine/Threonine-kinase, putative (Protein of unknown function, DUF547);(source:Araport11)                                                                                                                                                                                                                                                                                         | 37.48   | 25.53   | 1.47 | 6.70E-04 | 2.35E-03 |
| 2000 | 3 | F2-3 vs. L2-3 | 255251_at | AT4G04980 | hypothetical protein;(source:Araport11)                                                                                                                                                                                                                                                                                                                                            | 15.14   | 10.67   | 1.42 | 9.51E-04 | 3.09E-03 |
| 2001 | 3 | F2-3 vs. L2-3 | 247092_at | AT5G66380 | Encodes a folate transporter that is located in the chloroplast envelope and is able to mediate exogenous folate uptake when expressed in E. coli. However, this is not the sole folate transporter for chloroplasts as null mutants of this gene have no discernible phenotype when grown under folate-sufficient conditions and contained wild-type levels of folates in leaves. | 67.09   | 95.02   | 0.71 | 7.73E-04 | 2.62E-03 |
| 2002 | 3 | F2-3 vs. L2-3 | 260868_at | AT1G43860 | sequence-specific DNA binding transcription factor;(source:Araport11)                                                                                                                                                                                                                                                                                                              | 36.45   | 52.24   | 0.70 | 7.01E-04 | 2.43E-03 |
| 2003 | 3 | F2-3 vs. L2-3 | 265676_at | AT2G32070 | Deadenylase.                                                                                                                                                                                                                                                                                                                                                                       | 25.85   | 37.06   | 0.70 | 2.43E-04 | 1.10E-03 |
| 2004 | 3 | F2-3 vs. L2-3 | 259406_at | AT1G17690 | U3 small nucleolar RNA-associated protein;(source:Araport11)                                                                                                                                                                                                                                                                                                                       | 98.98   | 142.50  | 0.69 | 9.15E-04 | 2.99E-03 |
| 2005 | 3 | F2-3 vs. L2-3 | 260081_at | AT1G78170 | E3 ubiquitin-protein ligase;(source:Araport11)                                                                                                                                                                                                                                                                                                                                     | 12.08   | 17.62   | 0.69 | 8.66E-04 | 2.87E-03 |
| 2006 | 3 | F2-3 vs. L2-3 | 250282_at | AT5G13260 | myosin;(source:Araport11)                                                                                                                                                                                                                                                                                                                                                          | 42.19   | 61.52   | 0.69 | 1.37E-04 | 7.31E-04 |
| 2007 | 3 | F2-3 vs. L2-3 | 245793_at | AT1G32220 | NAD(P)-binding Rossmann-fold superfamily protein;(source:Araport11)                                                                                                                                                                                                                                                                                                                | 93.19   | 137.13  | 0.68 | 7.65E-05 | 4.85E-04 |
| 2008 | 3 | F2-3 vs. L2-3 | 251464_at | AT3G59380 | Encodes the alpha-subunit shared between protein farnesyltransferase and protein geranylgeranyltransferase-I. Involved in protein prenylation: covalent attachment of the C-15 isoprene farnesyl or the C-20 isoprene geranylgeranyl groups to the C-terminal end of some proteins. Involved in shoot and flower meristem homeostasis, and response to ABA and drought.            | 209.01  | 306.12  | 0.68 | 5.43E-04 | 2.00E-03 |
| 2009 | 3 | F2-3 vs. L2-3 | 259126_at | AT3G02280 | Also regulates leaf cell shape. Mutant is epistatic to era1.                                                                                                                                                                                                                                                                                                                       | 28.50   | 42.30   | 0.67 | 1.95E-04 | 9.37E-04 |
| 2010 | 3 | F2-3 vs. L2-3 | 258390_at | AT3G15410 | Flavodoxin family protein;(source:Araport11)                                                                                                                                                                                                                                                                                                                                       | 38.82   | 58.14   | 0.67 | 4.09E-04 | 1.61E-03 |
| 2011 | 3 | F2-3 vs. L2-3 | 246255_at | AT4G36650 | Leucine-rich repeat (LRR) family protein;(source:Araport11)                                                                                                                                                                                                                                                                                                                        | 17.45   | 26.18   | 0.67 | 6.13E-04 | 2.19E-03 |
| 2012 | 3 | F2-3 vs. L2-3 | 262774_at | AT1G13230 | Encodes a protein with similarity to the general transcription factor TFIIIB. pBRP binds rDNA sequences in vitro. pBRP has been localized to the outer face of the plastid membrane with GFP fusion however, under conditions of proteosome inhibition it is found in the nucleus.                                                                                                 | 15.73   | 23.99   | 0.66 | 3.46E-04 | 1.43E-03 |
| 2013 | 3 | F2-3 vs. L2-3 | 265798_at | AT2G35790 | Encodes a leucine-rich repeat protein pii-2. Located in the endoplasmic reticulum/plasma membrane continuum in Arabidopsis roots. Required for growth promotion and enhanced seed production mediated by the endophytic fungus Piriformospora indica in Arabidopsis.                                                                                                               | 94.44   | 143.31  | 0.66 | 4.09E-04 | 1.61E-03 |
| 2014 | 3 | F2-3 vs. L2-3 | 252927_at | AT4G39090 | transmembrane protein;(source:Araport11)                                                                                                                                                                                                                                                                                                                                           | 1111.56 | 1682.73 | 0.66 | 1.81E-04 | 8.86E-04 |
| 2015 | 3 | F2-3 vs. L2-3 | 250981_at | AT5G03140 | Similar to cysteine proteinases, induced by desiccation but not abscisic acid. Required for RRS1-R mediated resistance against Ralstonia solanacearum. Interacts with the R. solanacearum type III effector PopP2. RD19 associates with PopP2 to form a nuclear complex that is required for activation of the RRS1-R?mediated resistance response.                                | 71.92   | 109.06  | 0.66 | 1.18E-04 | 6.62E-04 |
|      |   |               |           |           | Concanavalin A-like lectin protein kinase family protein;(source:Araport11)                                                                                                                                                                                                                                                                                                        |         |         |      |          |          |

|      |   |               |            |           |                                                                                                                                                                                                                                                                                                                                                                                                                                                                                                                                                                                                                                                                                     |        |        |      |          |          |
|------|---|---------------|------------|-----------|-------------------------------------------------------------------------------------------------------------------------------------------------------------------------------------------------------------------------------------------------------------------------------------------------------------------------------------------------------------------------------------------------------------------------------------------------------------------------------------------------------------------------------------------------------------------------------------------------------------------------------------------------------------------------------------|--------|--------|------|----------|----------|
| 2016 | 3 | F2-3 vs. L2-3 | 249193_at  | AT5G42480 | Shows homology to the cyanobacterial cell division protein Ftn2, mutant only has two mesophyll cell chloroplasts. Protein was localized to a ring at the center of the chloroplasts. Probably involved in functions in the assembly and/or stabilization of the plastid-dividing FtsZ ring, inhibiting FtsZ filament formation in the chloroplast.                                                                                                                                                                                                                                                                                                                                  | 383.36 | 582.21 | 0.66 | 4.23E-04 | 1.66E-03 |
| 2017 | 3 | F2-3 vs. L2-3 | 248655_at  | AT5G48760 | Ribosomal protein L13 family protein;(source:Araport11)                                                                                                                                                                                                                                                                                                                                                                                                                                                                                                                                                                                                                             | 295.07 | 449.96 | 0.66 | 8.81E-04 | 2.91E-03 |
| 2018 | 3 | F2-3 vs. L2-3 | 259920_at  | AT1G72550 | tRNA synthetase beta subunit family protein;(source:Araport11)                                                                                                                                                                                                                                                                                                                                                                                                                                                                                                                                                                                                                      | 26.01  | 40.31  | 0.65 | 3.11E-04 | 1.33E-03 |
| 2019 | 3 | F2-3 vs. L2-3 | 253645_at  | AT4G29830 | VIP3 protein is composed of repeats of WD motif which is involved in protein complex formation. The gene is involved in flower timing and flower development. This gene is predicted to encode a protein with a DWD motif. It can bind to DDB1a in Y2H assays, and DDB1b in co-IP assays, and may be involved in the formation of a CUL4-based E3 ubiquitin ligase. Loss of gene function leads to a redistribution of H3K4me3 and K3K36me2 modifications within genes but not a change in the overall abundance of these modifications within chromatin. Also known as SKI8, a component of the SKI complex involved in exosome mediated RNA degradation. Member of PAF-C complex. | 300.80 | 464.17 | 0.65 | 3.29E-04 | 1.38E-03 |
| 2020 | 3 | F2-3 vs. L2-3 | 246621_at  | AT5G36230 | ARM repeat superfamily protein;(source:Araport11)                                                                                                                                                                                                                                                                                                                                                                                                                                                                                                                                                                                                                                   | 559.01 | 855.89 | 0.65 | 9.30E-05 | 5.58E-04 |
| 2021 | 3 | F2-3 vs. L2-3 | 247336_at  | AT5G63640 | ENTH/VHS/GAT family protein;(source:Araport11)                                                                                                                                                                                                                                                                                                                                                                                                                                                                                                                                                                                                                                      | 47.52  | 73.25  | 0.65 | 6.53E-04 | 2.30E-03 |
| 2022 | 3 | F2-3 vs. L2-3 | 247249_at  | AT5G64670 | Ribosomal protein L18e/L15 superfamily protein;(source:Araport11)                                                                                                                                                                                                                                                                                                                                                                                                                                                                                                                                                                                                                   | 206.03 | 316.31 | 0.65 | 1.34E-04 | 7.22E-04 |
| 2023 | 3 | F2-3 vs. L2-3 | 264179_at  | AT1G02180 | ferredoxin-like protein;(source:Araport11)                                                                                                                                                                                                                                                                                                                                                                                                                                                                                                                                                                                                                                          | 42.94  | 66.77  | 0.64 | 3.49E-04 | 1.44E-03 |
| 2024 | 3 | F2-3 vs. L2-3 | 265858_at  | AT2G01720 | Ribophorin I;(source:Araport11)                                                                                                                                                                                                                                                                                                                                                                                                                                                                                                                                                                                                                                                     | 232.43 | 360.93 | 0.64 | 1.84E-04 | 8.96E-04 |
| 2025 | 3 | F2-3 vs. L2-3 | 266579_at  | AT2G23930 | Putative small nuclear ribonucleoprotein G;(source:Araport11)                                                                                                                                                                                                                                                                                                                                                                                                                                                                                                                                                                                                                       | 256.70 | 398.15 | 0.64 | 8.76E-05 | 5.35E-04 |
| 2026 | 3 | F2-3 vs. L2-3 | 252124_at  | AT3G51010 | protein translocase subunit;(source:Araport11)                                                                                                                                                                                                                                                                                                                                                                                                                                                                                                                                                                                                                                      | 171.62 | 268.56 | 0.64 | 1.46E-04 | 7.67E-04 |
| 2027 | 3 | F2-3 vs. L2-3 | 250758_at  | AT5G06000 | One of the 2 genes that code for the G subunit of eukaryotic initiation factor 3 (EIF3).                                                                                                                                                                                                                                                                                                                                                                                                                                                                                                                                                                                            | 33.13  | 51.45  | 0.64 | 5.57E-04 | 2.04E-03 |
| 2028 | 3 | F2-3 vs. L2-3 | 248148_at  | AT5G54930 | AT hook motif-containing protein;(source:Araport11)                                                                                                                                                                                                                                                                                                                                                                                                                                                                                                                                                                                                                                 | 33.78  | 52.58  | 0.64 | 4.24E-04 | 1.66E-03 |
| 2029 | 3 | F2-3 vs. L2-3 | 247260_at  | AT5G64500 | Major facilitator superfamily protein;(source:Araport11)                                                                                                                                                                                                                                                                                                                                                                                                                                                                                                                                                                                                                            | 242.85 | 380.72 | 0.64 | 1.65E-04 | 8.35E-04 |
| 2030 | 3 | F2-3 vs. L2-3 | 256065_at  | AT1G07070 | Ribosomal protein L35Ae family protein;(source:Araport11)                                                                                                                                                                                                                                                                                                                                                                                                                                                                                                                                                                                                                           | 73.15  | 116.97 | 0.63 | 8.77E-04 | 2.90E-03 |
| 2031 | 3 | F2-3 vs. L2-3 | 264872_at  | AT1G24260 | Member of the MADs box transcription factor family. SEP3 is redundant with SEP1 and 2. Flowers of SEP1/2/3 triple mutants show a conversion of petals and stamens to sepals.SEP3 forms heterotetrameric complexes with other MADS box family members and binds to the CArG box motif.                                                                                                                                                                                                                                                                                                                                                                                               | 180.47 | 284.42 | 0.63 | 4.36E-05 | 3.29E-04 |
| 2032 | 3 | F2-3 vs. L2-3 | 262440_at  | AT1G47710 | Serine protease inhibitor (SERPIN) family protein;(source:Araport11)                                                                                                                                                                                                                                                                                                                                                                                                                                                                                                                                                                                                                | 108.22 | 173.07 | 0.63 | 2.74E-04 | 1.21E-03 |
| 2033 | 3 | F2-3 vs. L2-3 | 266932_s_a | AT1G63250 | DEA(D/H)-box RNA helicase family protein;(source:Araport11)                                                                                                                                                                                                                                                                                                                                                                                                                                                                                                                                                                                                                         | 26.30  | 41.74  | 0.63 | 2.10E-04 | 9.94E-04 |
| 2034 | 3 | F2-3 vs. L2-3 | 245730_at  | AT1G73470 | hypothetical protein;(source:Araport11)                                                                                                                                                                                                                                                                                                                                                                                                                                                                                                                                                                                                                                             | 49.27  | 78.65  | 0.63 | 4.49E-04 | 1.73E-03 |
| 2035 | 3 | F2-3 vs. L2-3 | 266506_at  | AT2G47850 | Zinc finger C-x8-C-x5-C-x3-H type family protein;(source:Araport11)                                                                                                                                                                                                                                                                                                                                                                                                                                                                                                                                                                                                                 | 53.02  | 84.34  | 0.63 | 4.20E-04 | 1.65E-03 |
| 2036 | 3 | F2-3 vs. L2-3 | 258138_at  | AT3G24495 | encodes a DNA mismatch repair homolog of human MutS gene, MSH6. There are four MutS genes in Arabidopsis, MSH2, MSH3, MSH6, and MSH7, which all act as heterodimers and bind to 51-mer duplexes. MSH2*MSH7 exhibit moderate affinity for a (T/G) substrate and weak binding of (+T), suggesting MSH2*MSH7 may be specialized for lesions/base mispairs not tested or for (T/G) mispairs in special contexts.                                                                                                                                                                                                                                                                        | 18.95  | 30.16  | 0.63 | 6.59E-04 | 2.31E-03 |
| 2037 | 3 | F2-3 vs. L2-3 | 256613_at  | AT3G29290 | Pentatricopeptide repeat (PPR) superfamily protein;(source:Araport11)                                                                                                                                                                                                                                                                                                                                                                                                                                                                                                                                                                                                               | 14.51  | 22.87  | 0.63 | 4.56E-04 | 1.75E-03 |
| 2038 | 3 | F2-3 vs. L2-3 | 253078_at  | AT4G36180 | Leucine-rich receptor-like protein kinase family protein;(source:Araport11)                                                                                                                                                                                                                                                                                                                                                                                                                                                                                                                                                                                                         | 13.35  | 21.28  | 0.63 | 1.71E-04 | 8.58E-04 |
| 2039 | 3 | F2-3 vs. L2-3 | 246190_at  | AT5G21010 | Encodes a member of the MATH-BTB domain proteins (BPMs) that directly interact with and target for proteasomal degradation the class I homeobox-leucine zipper (HD-ZIP) transcription factor ATHB6. Known members include AT5G19000 (BPM1), AT3G06190 (BPM2), AT2G39760 (BPM3), AT3G03740 (BPM4), AT5G21010 (BPM5) and AT3G43700 (BPM6).                                                                                                                                                                                                                                                                                                                                            | 79.76  | 127.26 | 0.63 | 9.57E-04 | 3.10E-03 |
| 2040 | 3 | F2-3 vs. L2-3 | 248710_at  | AT5G48480 | Lactoylglutathione lyase / glyoxalase I family protein;(source:Araport11)                                                                                                                                                                                                                                                                                                                                                                                                                                                                                                                                                                                                           | 38.39  | 61.25  | 0.63 | 1.10E-04 | 6.29E-04 |
| 2041 | 3 | F2-3 vs. L2-3 | 261671_at  | AT1G18340 | basal transcription factor complex subunit-like protein;(source:Araport11)                                                                                                                                                                                                                                                                                                                                                                                                                                                                                                                                                                                                          | 67.36  | 108.88 | 0.62 | 3.31E-04 | 1.38E-03 |
| 2042 | 3 | F2-3 vs. L2-3 | 265918_at  | AT2G15090 | Encodes KCS8, a member of the 3-ketoacyl-CoA synthase family involved in the biosynthesis of VLCFA (very long chain fatty acids). The mRNA is cell-to-cell mobile.                                                                                                                                                                                                                                                                                                                                                                                                                                                                                                                  | 237.39 | 382.04 | 0.62 | 5.71E-04 | 2.07E-03 |
| 2043 | 3 | F2-3 vs. L2-3 | 251574_at  | AT3G58100 | Encodes a member of the X8-GPI family of proteins. It localizes to the plasmodesmata and is predicted to bind callose.                                                                                                                                                                                                                                                                                                                                                                                                                                                                                                                                                              | 32.60  | 52.23  | 0.62 | 6.34E-05 | 4.29E-04 |
| 2044 | 3 | F2-3 vs. L2-3 | 253495_at  | AT4G31850 | encodes a protein containing 27 pentatricopeptide repeat (PPR) motifs. Functions in the stabilization of petL operon RNA and also in the translation of petL.                                                                                                                                                                                                                                                                                                                                                                                                                                                                                                                       | 42.64  | 68.71  | 0.62 | 9.96E-04 | 3.21E-03 |

|      |   |               |            |           |                                                                                                                                                                                                                                                                                                                                                                                                                   |        |         |      |          |          |
|------|---|---------------|------------|-----------|-------------------------------------------------------------------------------------------------------------------------------------------------------------------------------------------------------------------------------------------------------------------------------------------------------------------------------------------------------------------------------------------------------------------|--------|---------|------|----------|----------|
| 2045 | 3 | F2-3 vs. L2-3 | 253115_at  | AT4G35910 | Encodes a cytoplasmic thiouridylase that is essential for tRNA thiolation. Its activity appears to be important in root development.                                                                                                                                                                                                                                                                              | 32.69  | 52.47   | 0.62 | 2.43E-05 | 2.16E-04 |
| 2046 | 3 | F2-3 vs. L2-3 | 250860_at  | AT5G04770 | Encodes a member of the cationic amino acid transporter (CAT) subfamily of amino acid polyamine choline transporters. Does not mediate efficient uptake of basic amino acids in yeast or <i>Xenopus</i> systems but can transport neutral and acidic amino acid analogs. Expressed in sink tissues. Induced during infestation of roots by the plant parasitic root-knot nematode, <i>Meloidogyne incognita</i> . | 18.76  | 30.17   | 0.62 | 4.43E-04 | 1.72E-03 |
| 2047 | 3 | F2-3 vs. L2-3 | 250042_at  | AT5G18420 | Localized in the plasma membrane.<br>CCR4-NOT transcription complex subunit;(source:Araport11)                                                                                                                                                                                                                                                                                                                    | 282.95 | 457.94  | 0.62 | 3.45E-04 | 1.43E-03 |
| 2048 | 3 | F2-3 vs. L2-3 | 249801_at  | AT5G23580 | Member of a unique family of enzymes containing a single polypeptide chain with a kinase domain at the amino terminus and a putative calcium-binding EF hands structure at the carboxyl terminus; recombinant protein is fully active and induced by Ca <sup>2+</sup>                                                                                                                                             | 96.32  | 156.03  | 0.62 | 3.58E-04 | 1.47E-03 |
| 2049 | 3 | F2-3 vs. L2-3 | 246735_at  | AT5G27670 | Encodes HTA7, a histone H2A protein.                                                                                                                                                                                                                                                                                                                                                                              | 113.34 | 184.16  | 0.62 | 8.30E-05 | 5.17E-04 |
| 2050 | 3 | F2-3 vs. L2-3 | 248565_at  | AT5G49710 | RING finger protein;(source:Araport11)<br>Annexins are calcium binding proteins that are localized in the cytoplasm. When cytosolic Ca <sup>2+</sup> increases, they relocate to the plasma membrane. They may be involved in the Golgi-mediated secretion of polysaccharides.                                                                                                                                    | 64.73  | 103.66  | 0.62 | 1.59E-04 | 8.16E-04 |
| 2051 | 3 | F2-3 vs. L2-3 | 247210_at  | AT5G65020 | tumor necrosis factor receptor family protein;(source:Araport11)                                                                                                                                                                                                                                                                                                                                                  | 654.82 | 1058.74 | 0.62 | 2.67E-04 | 1.18E-03 |
| 2052 | 3 | F2-3 vs. L2-3 | 260390_at  | AT1G73940 | Amidophosphoribosyltransferase (ATase: EC 2.4.2.14) is a key enzyme in the pathway of purine nucleotide biosynthesis                                                                                                                                                                                                                                                                                              | 53.72  | 87.84   | 0.61 | 2.35E-04 | 1.08E-03 |
| 2053 | 3 | F2-3 vs. L2-3 | 263239_at  | AT2G16570 | Mitochondrial protein essential for embryo development.                                                                                                                                                                                                                                                                                                                                                           | 138.92 | 227.52  | 0.61 | 9.04E-04 | 2.97E-03 |
| 2054 | 3 | F2-3 vs. L2-3 | 245142_at  | AT2G45270 | Encodes a protein with little sequence identity with any other protein of known structure or function. Part of this protein shows a 42% sequence identity with the C-terminal domain of the 32-kD human thioredoxin-like protein.                                                                                                                                                                                 | 49.96  | 81.98   | 0.61 | 7.82E-04 | 2.64E-03 |
| 2055 | 3 | F2-3 vs. L2-3 | 258793_at  | AT3G04780 |                                                                                                                                                                                                                                                                                                                                                                                                                   | 79.37  | 130.08  | 0.61 | 2.40E-04 | 1.09E-03 |
| 2056 | 3 | F2-3 vs. L2-3 | 258332_at  | AT3G16180 | Encodes a low affinity nitrate transporter that is expressed in the plasma membrane and found in the phloem of the major veins of leaves. It is responsible for nitrate redistribution to young leaves.                                                                                                                                                                                                           | 12.71  | 20.83   | 0.61 | 4.30E-04 | 1.68E-03 |
| 2057 | 3 | F2-3 vs. L2-3 | 256939_at  | AT3G22630 | Encodes 20S proteasome beta subunit PBD1 (PBD1).                                                                                                                                                                                                                                                                                                                                                                  | 209.20 | 344.48  | 0.61 | 1.30E-04 | 7.10E-04 |
| 2058 | 3 | F2-3 vs. L2-3 | 252562_s_a | AT3G45930 | Histone superfamily protein;(source:Araport11)                                                                                                                                                                                                                                                                                                                                                                    | 39.63  | 64.53   | 0.61 | 8.61E-04 | 2.86E-03 |
| 2059 | 3 | F2-3 vs. L2-3 | 251938_at  | AT3G53430 | Ribosomal protein L11 family protein;(source:Araport11)                                                                                                                                                                                                                                                                                                                                                           | 146.39 | 240.03  | 0.61 | 1.80E-04 | 8.86E-04 |
| 2060 | 3 | F2-3 vs. L2-3 | 251852_at  | AT3G54750 | downstream neighbor of Son;(source:Araport11)                                                                                                                                                                                                                                                                                                                                                                     | 19.68  | 32.41   | 0.61 | 1.11E-04 | 6.34E-04 |
| 2061 | 3 | F2-3 vs. L2-3 | 251233_at  | AT3G62800 | Encodes a nuclear dsRNA-binding protein DRB4 that interacts specifically with DCL4. May regulate DCL4 function and thereby affect miRNA biogenesis. Also has an impact on polymerase IV-dependent siRNA levels. DRB4 interacts with the P6 viral protein from Cauliflower mosaic virus and may be a target of viral silencing suppression.                                                                        | 27.86  | 45.55   | 0.61 | 1.26E-04 | 6.94E-04 |
| 2062 | 3 | F2-3 vs. L2-3 | 248965_at  | AT5G45370 | nodulin MtN21-like transporter family protein                                                                                                                                                                                                                                                                                                                                                                     | 39.80  | 65.18   | 0.61 | 4.23E-05 | 3.23E-04 |
| 2063 | 3 | F2-3 vs. L2-3 | 261089_at  | AT1G07570 | Protein kinase capable of phosphorylating tyrosine, serine, and threonine residues<br>beta-1,3-n-acetylglucosaminyltransferase radical fringe protein, putative (DUF604);(source:Araport11)                                                                                                                                                                                                                       | 214.21 | 357.49  | 0.60 | 1.29E-04 | 7.05E-04 |
| 2064 | 3 | F2-3 vs. L2-3 | 256533_at  | AT1G33250 | Zinc finger, C3HC4 type (RING finger) family protein;(source:Araport11)                                                                                                                                                                                                                                                                                                                                           | 30.92  | 51.75   | 0.60 | 6.81E-05 | 4.47E-04 |
| 2065 | 3 | F2-3 vs. L2-3 | 260008_at  | AT1G68070 | Deadenylase.                                                                                                                                                                                                                                                                                                                                                                                                      | 166.33 | 276.18  | 0.60 | 1.58E-04 | 8.14E-04 |
| 2066 | 3 | F2-3 vs. L2-3 | 261887_at  | AT1G80780 | elongator complex protein;(source:Araport11)                                                                                                                                                                                                                                                                                                                                                                      | 61.05  | 102.42  | 0.60 | 5.63E-05 | 3.95E-04 |
| 2067 | 3 | F2-3 vs. L2-3 | 265332_at  | AT2G18410 | squalene epoxidase 2;(source:Araport11)                                                                                                                                                                                                                                                                                                                                                                           | 14.94  | 24.79   | 0.60 | 1.20E-04 | 6.66E-04 |
| 2068 | 3 | F2-3 vs. L2-3 | 266831_at  | AT2G22830 | Encodes a chloroplast-localized chaperonin 10 whose mRNA is expressed in leaves and stems but not roots.                                                                                                                                                                                                                                                                                                          | 20.48  | 33.94   | 0.60 | 1.41E-04 | 7.47E-04 |
| 2069 | 3 | F2-3 vs. L2-3 | 266887_at  | AT2G44650 | Nuclear pore localization protein NPL4;(source:Araport11)                                                                                                                                                                                                                                                                                                                                                         | 82.06  | 137.75  | 0.60 | 8.16E-04 | 2.74E-03 |
| 2070 | 3 | F2-3 vs. L2-3 | 266459_at  | AT2G47970 | transmembrane protein;(source:Araport11)                                                                                                                                                                                                                                                                                                                                                                          | 37.91  | 62.96   | 0.60 | 9.13E-04 | 2.99E-03 |
| 2071 | 3 | F2-3 vs. L2-3 | 252603_at  | AT3G45050 |                                                                                                                                                                                                                                                                                                                                                                                                                   | 28.14  | 47.25   | 0.60 | 5.30E-04 | 1.96E-03 |
| 2072 | 3 | F2-3 vs. L2-3 | 252189_at  | AT3G50070 | Encode CYCD3;3, a CYCD3 D-type cyclin. Important for determining cell number in developing lateral organs. Mediating cytokinin effects in apical growth and development.                                                                                                                                                                                                                                          | 79.29  | 132.92  | 0.60 | 5.45E-04 | 2.01E-03 |
| 2073 | 3 | F2-3 vs. L2-3 | 251921_at  | AT3G53890 | Cytosolic ribosomal protein. Mutants enhance the variegation effect of var2 mutations suggesting a link between cytosolic translation and chloroplast development.                                                                                                                                                                                                                                                | 13.03  | 21.86   | 0.60 | 5.85E-05 | 4.05E-04 |

|      |   |               |           |           |                                                                                                                                                                                                                                                                                                       |        |         |      |          |          |
|------|---|---------------|-----------|-----------|-------------------------------------------------------------------------------------------------------------------------------------------------------------------------------------------------------------------------------------------------------------------------------------------------------|--------|---------|------|----------|----------|
| 2074 | 3 | F2-3 vs. L2-3 | 251200_at | AT3G63010 | Encodes a gibberellin (GA) receptor ortholog of the rice GA receptor gene (OsGID1). Has GA-binding activity, showing higher affinity to GA4. Interacts with DELLA proteins in vivo in the presence of GA4. The mRNA is cell-to-cell mobile.                                                           | 21.56  | 36.23   | 0.60 | 3.98E-04 | 1.58E-03 |
| 2075 | 3 | F2-3 vs. L2-3 | 254188_at | AT4G23920 | Encodes a protein with UDP-D-glucose 4-epimerase activity. Involved in growth and cell wall carbohydrate biosynthesis.                                                                                                                                                                                | 74.59  | 124.77  | 0.60 | 6.37E-05 | 4.30E-04 |
| 2076 | 3 | F2-3 vs. L2-3 | 253976_at | AT4G26610 | D6PK family kinase involved in pulse-induced phototropism but also for time-dependent second positive phototropism, and continuous light-induced hypocotyl phototropism.                                                                                                                              | 52.55  | 88.14   | 0.60 | 7.79E-04 | 2.63E-03 |
| 2077 | 3 | F2-3 vs. L2-3 | 252883_at | AT4G39520 | Encodes a member of the DRG (developmentally regulated G-protein) family. Has GTPase activity.                                                                                                                                                                                                        | 21.62  | 36.07   | 0.60 | 7.32E-04 | 2.51E-03 |
| 2078 | 3 | F2-3 vs. L2-3 | 250434_at | AT5G10390 | Histone superfamily protein;(source:Araport11)                                                                                                                                                                                                                                                        | 124.52 | 207.95  | 0.60 | 6.02E-04 | 2.16E-03 |
| 2079 | 3 | F2-3 vs. L2-3 | 250382_at | AT5G11580 | Regulator of chromosome condensation (RCC1) family protein;(source:Araport11)                                                                                                                                                                                                                         | 95.32  | 157.95  | 0.60 | 6.29E-05 | 4.26E-04 |
| 2080 | 3 | F2-3 vs. L2-3 | 249074_at | AT5G44080 | Basic-leucine zipper (bZIP) transcription factor family protein;(source:Araport11)                                                                                                                                                                                                                    | 77.23  | 129.41  | 0.60 | 2.47E-04 | 1.12E-03 |
| 2081 | 3 | F2-3 vs. L2-3 | 248878_at | AT5G46160 | Ribosomal protein L14p/L23e family protein;(source:Araport11)                                                                                                                                                                                                                                         | 145.70 | 244.32  | 0.60 | 1.17E-04 | 6.58E-04 |
| 2082 | 3 | F2-3 vs. L2-3 | 247862_at | AT5G58250 | Involved in tetrapyrrole biosynthesis. May function as a scaffold protein to stabilize CHL27.                                                                                                                                                                                                         | 64.35  | 107.16  | 0.60 | 3.19E-04 | 1.35E-03 |
| 2083 | 3 | F2-3 vs. L2-3 | 255883_at | AT1G20270 | 2-oxoglutarate (2OG) and Fe(II)-dependent oxygenase superfamily protein;(source:Araport11)                                                                                                                                                                                                            | 68.22  | 115.85  | 0.59 | 3.66E-04 | 1.49E-03 |
| 2084 | 3 | F2-3 vs. L2-3 | 265101_at | AT1G30880 | hypothetical protein;(source:Araport11)                                                                                                                                                                                                                                                               | 74.14  | 125.06  | 0.59 | 4.41E-04 | 1.71E-03 |
| 2085 | 3 | F2-3 vs. L2-3 | 255985_at | AT1G34150 | Pseudouridine synthase family protein;(source:Araport11)                                                                                                                                                                                                                                              | 56.25  | 94.84   | 0.59 | 4.00E-04 | 1.59E-03 |
| 2086 | 3 | F2-3 vs. L2-3 | 262245_at | AT1G48240 | member of NPSN Gene Family                                                                                                                                                                                                                                                                            | 13.42  | 22.69   | 0.59 | 3.04E-04 | 1.31E-03 |
| 2087 | 3 | F2-3 vs. L2-3 | 265426_at | AT2G20740 | Tetraspanin family protein;(source:Araport11)                                                                                                                                                                                                                                                         | 363.83 | 617.70  | 0.59 | 1.87E-05 | 1.83E-04 |
| 2088 | 3 | F2-3 vs. L2-3 | 264044_at | AT2G22480 | phosphofructokinase 5;(source:Araport11)                                                                                                                                                                                                                                                              | 181.88 | 306.39  | 0.59 | 2.21E-04 | 1.03E-03 |
| 2089 | 3 | F2-3 vs. L2-3 | 267284_at | AT2G23700 | Itga6 (Protein of unknown function, DUF547);(source:Araport11)                                                                                                                                                                                                                                        | 54.69  | 92.39   | 0.59 | 1.85E-04 | 8.99E-04 |
| 2090 | 3 | F2-3 vs. L2-3 | 266789_at | AT2G29020 | Rab5-interacting family protein;(source:Araport11)                                                                                                                                                                                                                                                    | 401.53 | 680.35  | 0.59 | 8.58E-04 | 2.85E-03 |
| 2091 | 3 | F2-3 vs. L2-3 | 256278_at | AT3G12130 | KHZ1 is a CCCH zinc-finger and KH domain protein belonging to the VII subfamily. It is expressed throughout the plant. Highly similar to KHZ2. khz1 mutants are late flowering and double mutants with khz2 are even more late flowering. Overexpression leads to increased rates of leaf senescence. | 33.27  | 56.56   | 0.59 | 4.27E-05 | 3.24E-04 |
| 2092 | 3 | F2-3 vs. L2-3 | 245442_at | AT4G16710 | glycosyltransferase family protein 28;(source:Araport11)                                                                                                                                                                                                                                              | 176.51 | 297.60  | 0.59 | 5.54E-04 | 2.03E-03 |
| 2093 | 3 | F2-3 vs. L2-3 | 254476_at | AT4G20410 | Encodes a member of the gamma-soluble NSF attachment protein (gSNAP) gene family.                                                                                                                                                                                                                     | 117.61 | 199.89  | 0.59 | 6.34E-04 | 2.25E-03 |
| 2094 | 3 | F2-3 vs. L2-3 | 245998_at | AT5G20830 | Encodes a protein with sucrose synthase activity (SUS1).                                                                                                                                                                                                                                              | 261.01 | 439.90  | 0.59 | 9.34E-04 | 3.04E-03 |
| 2095 | 3 | F2-3 vs. L2-3 | 247053_at | AT5G66710 | Protein kinase superfamily protein;(source:Araport11)                                                                                                                                                                                                                                                 | 16.45  | 27.82   | 0.59 | 6.17E-04 | 2.21E-03 |
| 2096 | 3 | F2-3 vs. L2-3 | 261030_at | AT1G17410 | Nucleoside diphosphate kinase family protein;(source:Araport11)                                                                                                                                                                                                                                       | 16.30  | 27.87   | 0.58 | 8.25E-04 | 2.76E-03 |
| 2097 | 3 | F2-3 vs. L2-3 | 245644_at | AT1G25320 | Leucine-rich repeat protein kinase family protein;(source:Araport11)                                                                                                                                                                                                                                  | 87.94  | 150.99  | 0.58 | 6.71E-04 | 2.35E-03 |
| 2098 | 3 | F2-3 vs. L2-3 | 261294_at | AT1G48430 | Dihydroxyacetone kinase;(source:Araport11)                                                                                                                                                                                                                                                            | 28.03  | 48.38   | 0.58 | 5.74E-05 | 4.01E-04 |
| 2099 | 3 | F2-3 vs. L2-3 | 259612_at | AT1G52300 | Zinc-binding ribosomal protein family protein;(source:Araport11)                                                                                                                                                                                                                                      | 675.52 | 1168.38 | 0.58 | 4.76E-04 | 1.80E-03 |
| 2100 | 3 | F2-3 vs. L2-3 | 256293_at | AT1G69440 | Encodes ARGONAUTE7, a member of the ARGONAUTE family, characterised by the presence of PAZ and PIWI domains. Involved in the regulation of developmental timing. Required for the accumulation of TAS3 ta-siRNAs but not for accumulation of miR171, miR173, miR390 or mi391.                         | 22.98  | 39.36   | 0.58 | 1.10E-04 | 6.29E-04 |
| 2101 | 3 | F2-3 vs. L2-3 | 260373_at | AT1G73970 | Localized in mature rosette leaves and floral buds. obscurin-like protein;(source:Araport11)                                                                                                                                                                                                          | 25.52  | 43.84   | 0.58 | 4.46E-04 | 1.72E-03 |
| 2102 | 3 | F2-3 vs. L2-3 | 264114_at | AT2G31270 | Encodes a cyclin-dependent protein kinase. Involved in nuclear DNA replication and plastid division.                                                                                                                                                                                                  | 14.61  | 25.34   | 0.58 | 6.86E-04 | 2.39E-03 |
| 2103 | 3 | F2-3 vs. L2-3 | 266929_at | AT2G45850 | Located in nucleus and chloroplast. AT hook motif DNA-binding family protein;(source:Araport11)                                                                                                                                                                                                       | 35.19  | 60.73   | 0.58 | 9.29E-04 | 3.03E-03 |
| 2104 | 3 | F2-3 vs. L2-3 | 259099_at | AT3G05010 | Encodes a candidate G-protein Coupled Receptor that is involved in the regulation of root growth by bacterial N-acyl-homoserine lactones (AHLs) and plays a role in mediating interactions between plants and microbes.                                                                               | 302.52 | 521.01  | 0.58 | 9.24E-05 | 5.56E-04 |
| 2105 | 3 | F2-3 vs. L2-3 | 259255_at | AT3G07690 | 6-phosphogluconate dehydrogenase family protein;(source:Araport11)                                                                                                                                                                                                                                    | 68.79  | 119.01  | 0.58 | 2.13E-04 | 1.00E-03 |
| 2106 | 3 | F2-3 vs. L2-3 | 256961_at | AT3G13445 | TBP (TATA binding protein) associates with TAF(II)s (TBP-associated factors) to form the TFIID general transcription factor complex                                                                                                                                                                   | 71.17  | 122.03  | 0.58 | 2.10E-05 | 1.95E-04 |
| 2107 | 3 | F2-3 vs. L2-3 | 256854_at | AT3G15180 | ARM repeat superfamily protein;(source:Araport11)                                                                                                                                                                                                                                                     | 95.40  | 164.68  | 0.58 | 7.03E-04 | 2.44E-03 |

|      |   |               |           |           |                                                                                                                                                                                                                                                                                                                                                                                                                                                                                                                                                                                                                                                |        |         |      |          |          |
|------|---|---------------|-----------|-----------|------------------------------------------------------------------------------------------------------------------------------------------------------------------------------------------------------------------------------------------------------------------------------------------------------------------------------------------------------------------------------------------------------------------------------------------------------------------------------------------------------------------------------------------------------------------------------------------------------------------------------------------------|--------|---------|------|----------|----------|
|      |   |               |           |           | Encodes a protein with similarity to mammalian RACKs. RACKs function to shuttle activated protein kinase C to different subcellular sites and may also function as a scaffold through physical interactions with other proteins. RACK1C has no phenotype on its own and probably acts redundantly with RACK1A and RACK1B.                                                                                                                                                                                                                                                                                                                      | 641.34 | 1102.92 | 0.58 | 2.53E-04 | 1.13E-03 |
| 2108 | 3 | F2-3 vs. L2-3 | 258155_at | AT3G18130 |                                                                                                                                                                                                                                                                                                                                                                                                                                                                                                                                                                                                                                                |        |         |      |          |          |
| 2109 | 3 | F2-3 vs. L2-3 | 257199_at | AT3G23710 | Tic22-like family protein;(source:Araport11)                                                                                                                                                                                                                                                                                                                                                                                                                                                                                                                                                                                                   | 67.41  | 116.23  | 0.58 | 3.23E-04 | 1.36E-03 |
| 2110 | 3 | F2-3 vs. L2-3 | 255128_at | AT4G08310 | DNA ligase;(source:Araport11)                                                                                                                                                                                                                                                                                                                                                                                                                                                                                                                                                                                                                  | 14.57  | 25.33   | 0.58 | 5.57E-04 | 2.04E-03 |
|      |   |               |           |           | Encodes a protein predicted to act as a carboxylesterase. It has similarity to the SABP2 methyl salicylate esterase from tobacco. This protein does not act on methyl IAA, methyl JA, MeSA, MeGA4, or MEGA9 in vitro.                                                                                                                                                                                                                                                                                                                                                                                                                          |        |         |      |          |          |
| 2111 | 3 | F2-3 vs. L2-3 | 255025_at | AT4G09900 | Protein containing PAM2 motif which mediates interaction with the PABC domain of polyadenyl binding proteins.                                                                                                                                                                                                                                                                                                                                                                                                                                                                                                                                  | 22.04  | 37.85   | 0.58 | 2.78E-04 | 1.22E-03 |
| 2112 | 3 | F2-3 vs. L2-3 | 245602_at | AT4G14270 |                                                                                                                                                                                                                                                                                                                                                                                                                                                                                                                                                                                                                                                | 56.20  | 97.27   | 0.58 | 4.77E-04 | 1.80E-03 |
|      |   |               |           |           | Encodes a homeobox protein similar to GL2. It is expressed in both the apical and basal daughter cells of the zygote as well as their progeny. Expression is detected starting the two-celled stage of embryo development and is later restricted to the outermost, epidermal cell layer from its inception. Its promoter is highly modular with each region contributing to specific aspects of the gene Primes spatial and temporal expression. Double mutant analysis with PDF2, another L1-specific gene, suggests that their functions are partially redundant and the absence of both of the genes result in abnormal shoot development. |        |         |      |          |          |
| 2113 | 3 | F2-3 vs. L2-3 | 254370_at | AT4G21750 | member of Myosin-like proteins                                                                                                                                                                                                                                                                                                                                                                                                                                                                                                                                                                                                                 | 102.41 | 176.64  | 0.58 | 2.01E-05 | 1.90E-04 |
| 2114 | 3 | F2-3 vs. L2-3 | 253368_at | AT4G33200 | DNAJ heat shock N-terminal domain-containing protein;(source:Araport11)                                                                                                                                                                                                                                                                                                                                                                                                                                                                                                                                                                        | 79.66  | 136.95  | 0.58 | 5.40E-04 | 1.99E-03 |
| 2115 | 3 | F2-3 vs. L2-3 | 252935_at | AT4G39150 | ssDNA-binding transcriptional regulator;(source:Araport11)                                                                                                                                                                                                                                                                                                                                                                                                                                                                                                                                                                                     | 80.74  | 139.49  | 0.58 | 8.66E-05 | 5.30E-04 |
| 2116 | 3 | F2-3 vs. L2-3 | 245930_at | AT5G09240 | Protein kinase superfamily protein;(source:Araport11)                                                                                                                                                                                                                                                                                                                                                                                                                                                                                                                                                                                          | 39.91  | 68.76   | 0.58 | 5.76E-04 | 2.08E-03 |
| 2117 | 3 | F2-3 vs. L2-3 | 245898_at | AT5G11020 | hypothetical protein (DUF581);(source:Araport11)                                                                                                                                                                                                                                                                                                                                                                                                                                                                                                                                                                                               | 165.76 | 285.29  | 0.58 | 9.33E-04 | 3.04E-03 |
| 2118 | 3 | F2-3 vs. L2-3 | 248820_at | AT5G47060 |                                                                                                                                                                                                                                                                                                                                                                                                                                                                                                                                                                                                                                                | 78.12  | 134.46  | 0.58 | 2.87E-04 | 1.25E-03 |
|      |   |               |           |           | Encodes a legume-type lectin receptor kinase that is structurally distinct from the mammalian extracellular ATP receptors and acts as an extracellular ATP receptor in Arabidopsis. Extracellular ATP acts as a damage-associated molecular pattern in plants, and its signaling through P2K1 is important for mounting an effective defense response against various pathogenic microorganisms. It also plays a role in cell wall-plasma membrane adhesion.                                                                                                                                                                                   |        |         |      |          |          |
| 2119 | 3 | F2-3 vs. L2-3 | 247626_at | AT5G60300 | Small nuclear ribonucleoprotein family protein;(source:Araport11)                                                                                                                                                                                                                                                                                                                                                                                                                                                                                                                                                                              | 89.89  | 156.25  | 0.58 | 6.83E-04 | 2.38E-03 |
| 2120 | 3 | F2-3 vs. L2-3 | 264364_at | AT1G03330 |                                                                                                                                                                                                                                                                                                                                                                                                                                                                                                                                                                                                                                                | 155.85 | 273.98  | 0.57 | 8.60E-06 | 1.07E-04 |
| 2121 | 3 | F2-3 vs. L2-3 | 262238_at | AT1G48300 | Cytosolic iron-sulfur protein with a [2Fe-2S] cluster which synthesizes triacylglycerol (DGAT activity).                                                                                                                                                                                                                                                                                                                                                                                                                                                                                                                                       | 170.82 | 298.28  | 0.57 | 5.00E-04 | 1.87E-03 |
| 2122 | 3 | F2-3 vs. L2-3 | 260604_at | AT1G55840 | Sec14p-like phosphatidylinositol transfer family protein;(source:Araport11)                                                                                                                                                                                                                                                                                                                                                                                                                                                                                                                                                                    | 355.62 | 625.28  | 0.57 | 2.24E-04 | 1.04E-03 |
| 2123 | 3 | F2-3 vs. L2-3 | 257460_at | AT1G75580 | SAUR-like auxin-responsive protein family;(source:Araport11)                                                                                                                                                                                                                                                                                                                                                                                                                                                                                                                                                                                   | 9.10   | 16.08   | 0.57 | 8.37E-04 | 2.79E-03 |
| 2124 | 3 | F2-3 vs. L2-3 | 263332_at | AT2G03870 | Small nuclear ribonucleoprotein family protein;(source:Araport11)                                                                                                                                                                                                                                                                                                                                                                                                                                                                                                                                                                              | 242.82 | 424.81  | 0.57 | 8.40E-06 | 1.05E-04 |
| 2125 | 3 | F2-3 vs. L2-3 | 258799_at | AT3G04770 | 40s ribosomal protein SA B;(source:Araport11)                                                                                                                                                                                                                                                                                                                                                                                                                                                                                                                                                                                                  | 162.51 | 286.74  | 0.57 | 9.75E-05 | 5.77E-04 |
|      |   |               |           |           | Belongs to a subgroup of SGS3-like proteins that act redundantly in RNA-directed DNA methylation: AT1G15910 (FDM1), AT4G00380 (FDM2), AT3G12550 (FDM3), AT1G13790 (FDM4), AT1G80790 (FDM5).                                                                                                                                                                                                                                                                                                                                                                                                                                                    |        |         |      |          |          |
| 2126 | 3 | F2-3 vs. L2-3 | 256282_at | AT3G12550 | Ribosomal protein S10p/S20e family protein;(source:Araport11)                                                                                                                                                                                                                                                                                                                                                                                                                                                                                                                                                                                  | 25.80  | 45.17   | 0.57 | 3.88E-05 | 3.03E-04 |
| 2127 | 3 | F2-3 vs. L2-3 | 257190_at | AT3G13120 |                                                                                                                                                                                                                                                                                                                                                                                                                                                                                                                                                                                                                                                | 36.04  | 62.98   | 0.57 | 6.52E-04 | 2.30E-03 |
|      |   |               |           |           | Encodes a nuclear localized WD-repeat containing protein involved in negative regulation of knox gene expression via epigenetic mechanism of chromatin re-organization. It is a part of the HISTONE REGULATOR complex that deposits histones in a DNA synthesis-independent manner and affects both nucleosome occupancy and the maintenance of transcriptional silencing. Interacts physically and genetically with AS1. Expressed in meristem and leaf primordia. Homozygous mutants are embryo lethal. Phenotype of cosuppressed lines is variable but show effects on leaf development similar to as1/as2.                                 |        |         |      |          |          |
| 2128 | 3 | F2-3 vs. L2-3 | 252637_at | AT3G44530 | kinase with tetratricopeptide repeat domain-containing protein;(source:Araport11)                                                                                                                                                                                                                                                                                                                                                                                                                                                                                                                                                              | 80.19  | 141.11  | 0.57 | 8.40E-05 | 5.21E-04 |
| 2129 | 3 | F2-3 vs. L2-3 | 251922_at | AT3G54030 |                                                                                                                                                                                                                                                                                                                                                                                                                                                                                                                                                                                                                                                | 18.23  | 32.23   | 0.57 | 7.07E-04 | 2.45E-03 |
|      |   |               |           |           | EID1 is an F-box protein that functions as a negative regulator in phytochrome A (phyA)-specific light signalling. Expressed at all stages of plant development independently of light conditions, localizes to the nucleus, and forms nuclear speckles under continuous far-red light. Forms stable dimeric and trimeric complexes with several ASK proteins and Cullin1 in yeast and in planta. Arabidopsis thaliana putative c-myc-like transcription factor MYB3R-4. Functions in powdery mildew induced host endoreduplication at the site of infection.                                                                                  |        |         |      |          |          |
| 2130 | 3 | F2-3 vs. L2-3 | 255478_at | AT4G02440 |                                                                                                                                                                                                                                                                                                                                                                                                                                                                                                                                                                                                                                                | 54.05  | 95.02   | 0.57 | 8.53E-04 | 2.84E-03 |
| 2131 | 3 | F2-3 vs. L2-3 | 250386_at | AT5G11510 |                                                                                                                                                                                                                                                                                                                                                                                                                                                                                                                                                                                                                                                | 38.06  | 66.64   | 0.57 | 5.93E-04 | 2.13E-03 |

|      |   |               |           |           |                                                                                                                                                                                                                                                                                                                                                                                                                                                                                                                                                                                                                                                                                                                                                                                                                                                                                                                                                                                                                                                                                       |        |        |      |          |          |
|------|---|---------------|-----------|-----------|---------------------------------------------------------------------------------------------------------------------------------------------------------------------------------------------------------------------------------------------------------------------------------------------------------------------------------------------------------------------------------------------------------------------------------------------------------------------------------------------------------------------------------------------------------------------------------------------------------------------------------------------------------------------------------------------------------------------------------------------------------------------------------------------------------------------------------------------------------------------------------------------------------------------------------------------------------------------------------------------------------------------------------------------------------------------------------------|--------|--------|------|----------|----------|
| 2132 | 3 | F2-3 vs. L2-3 | 248421_at | AT5G51510 | jagunal-like protein;(source:Araport11)                                                                                                                                                                                                                                                                                                                                                                                                                                                                                                                                                                                                                                                                                                                                                                                                                                                                                                                                                                                                                                               | 150.21 | 261.43 | 0.57 | 6.93E-05 | 4.53E-04 |
| 2133 | 3 | F2-3 vs. L2-3 | 264857_at | AT1G24170 | Encodes a protein with putative galacturonosyltransferase activity. specifically interacts with FUS6/COP11 via the C-terminal domain of FUS6/COP11 and associates with an ATPase subunit of the 19S proteasome regulatory complex, AtS6A. The mRNA is cell-to-cell mobile.                                                                                                                                                                                                                                                                                                                                                                                                                                                                                                                                                                                                                                                                                                                                                                                                            | 74.57  | 132.29 | 0.56 | 2.14E-05 | 1.97E-04 |
| 2134 | 3 | F2-3 vs. L2-3 | 260842_at | AT1G29150 | Member of a family of proteins related to PUP1, a purine transporter. May be involved in the transport of purine and purine derivatives such as cytokinins, across the plasma membrane.                                                                                                                                                                                                                                                                                                                                                                                                                                                                                                                                                                                                                                                                                                                                                                                                                                                                                               | 64.07  | 115.26 | 0.56 | 6.11E-04 | 2.19E-03 |
| 2135 | 3 | F2-3 vs. L2-3 | 264497_at | AT1G30840 | RING/U-box superfamily protein;(source:Araport11)                                                                                                                                                                                                                                                                                                                                                                                                                                                                                                                                                                                                                                                                                                                                                                                                                                                                                                                                                                                                                                     | 27.36  | 48.45  | 0.56 | 3.25E-04 | 1.37E-03 |
| 2136 | 3 | F2-3 vs. L2-3 | 260229_at | AT1G74370 | Single hybrid motif superfamily protein;(source:Araport11)                                                                                                                                                                                                                                                                                                                                                                                                                                                                                                                                                                                                                                                                                                                                                                                                                                                                                                                                                                                                                            | 48.67  | 86.42  | 0.56 | 7.16E-05 | 4.63E-04 |
| 2137 | 3 | F2-3 vs. L2-3 | 262699_at | AT1G75980 | Encodes a protein with high homology to the Replication Factor C, Subunit 3 (RFC3) of yeast and other eukaryotes. rfc3 mutants are hypersensitive to salicylic acid and exhibit enhanced induction of PR genes and resistance against virulent oomycete Hyaloperonospora arabidopsidis Noco2. The enhanced pathogen resistance in the mutant is NPR1-independent.                                                                                                                                                                                                                                                                                                                                                                                                                                                                                                                                                                                                                                                                                                                     | 86.41  | 154.02 | 0.56 | 6.98E-05 | 4.55E-04 |
| 2138 | 3 | F2-3 vs. L2-3 | 259732_at | AT1G77470 | zinc ion binding protein;(source:Araport11)                                                                                                                                                                                                                                                                                                                                                                                                                                                                                                                                                                                                                                                                                                                                                                                                                                                                                                                                                                                                                                           | 104.86 | 187.93 | 0.56 | 2.20E-05 | 2.02E-04 |
| 2139 | 3 | F2-3 vs. L2-3 | 267309_at | AT2G19385 | Chaperone DnaJ-domain superfamily protein;(source:Araport11)                                                                                                                                                                                                                                                                                                                                                                                                                                                                                                                                                                                                                                                                                                                                                                                                                                                                                                                                                                                                                          | 31.90  | 56.95  | 0.56 | 1.55E-04 | 8.02E-04 |
| 2140 | 3 | F2-3 vs. L2-3 | 267462_at | AT2G33735 | nucleolar/coiled-body phosphoprotein;(source:Araport11)                                                                                                                                                                                                                                                                                                                                                                                                                                                                                                                                                                                                                                                                                                                                                                                                                                                                                                                                                                                                                               | 77.70  | 137.98 | 0.56 | 7.32E-04 | 2.51E-03 |
| 2141 | 3 | F2-3 vs. L2-3 | 258801_at | AT3G04560 | hypothetical protein;(source:Araport11)                                                                                                                                                                                                                                                                                                                                                                                                                                                                                                                                                                                                                                                                                                                                                                                                                                                                                                                                                                                                                                               | 235.52 | 421.34 | 0.56 | 1.79E-04 | 8.84E-04 |
| 2142 | 3 | F2-3 vs. L2-3 | 259250_at | AT3G07580 | Ribosomal protein L19e family protein;(source:Araport11)                                                                                                                                                                                                                                                                                                                                                                                                                                                                                                                                                                                                                                                                                                                                                                                                                                                                                                                                                                                                                              | 21.12  | 37.55  | 0.56 | 3.83E-04 | 1.54E-03 |
| 2143 | 3 | F2-3 vs. L2-3 | 258410_at | AT3G16780 | BSD domain-containing protein;(source:Araport11)                                                                                                                                                                                                                                                                                                                                                                                                                                                                                                                                                                                                                                                                                                                                                                                                                                                                                                                                                                                                                                      | 402.54 | 720.08 | 0.56 | 1.44E-04 | 7.62E-04 |
| 2144 | 3 | F2-3 vs. L2-3 | 257601_at | AT3G24820 | Encodes one of the 3 ribonucleotide reductase (RNR) small subunit genes. TSO2 transcription occurs predominantly at the S-phase of the cell cycle and its expression pattern is consistent with its role in dNDP biosynthesis during DNA replication in actively dividing cells. Critical for cell cycle progression, DNA damage repair and plant development.                                                                                                                                                                                                                                                                                                                                                                                                                                                                                                                                                                                                                                                                                                                        | 12.71  | 22.90  | 0.56 | 8.22E-04 | 2.75E-03 |
| 2145 | 3 | F2-3 vs. L2-3 | 257809_at | AT3G27060 | Histone superfamily protein;(source:Araport11)                                                                                                                                                                                                                                                                                                                                                                                                                                                                                                                                                                                                                                                                                                                                                                                                                                                                                                                                                                                                                                        | 76.21  | 135.77 | 0.56 | 6.22E-04 | 2.22E-03 |
| 2146 | 3 | F2-3 vs. L2-3 | 257714_at | AT3G27360 | Protein kinase superfamily protein;(source:Araport11)                                                                                                                                                                                                                                                                                                                                                                                                                                                                                                                                                                                                                                                                                                                                                                                                                                                                                                                                                                                                                                 | 35.46  | 63.59  | 0.56 | 9.52E-05 | 5.66E-04 |
| 2147 | 3 | F2-3 vs. L2-3 | 251251_at | AT3G62220 | transmembrane protein;(source:Araport11)                                                                                                                                                                                                                                                                                                                                                                                                                                                                                                                                                                                                                                                                                                                                                                                                                                                                                                                                                                                                                                              | 117.77 | 209.23 | 0.56 | 9.64E-05 | 5.71E-04 |
| 2148 | 3 | F2-3 vs. L2-3 | 255553_at | AT4G01960 | Encodes a protein with UDP-D-glucose 4-epimerase activity.                                                                                                                                                                                                                                                                                                                                                                                                                                                                                                                                                                                                                                                                                                                                                                                                                                                                                                                                                                                                                            | 86.96  | 155.26 | 0.56 | 3.43E-04 | 1.42E-03 |
| 2149 | 3 | F2-3 vs. L2-3 | 254952_at | AT4G10960 | embryo defective 3006;(source:Araport11)                                                                                                                                                                                                                                                                                                                                                                                                                                                                                                                                                                                                                                                                                                                                                                                                                                                                                                                                                                                                                                              | 47.86  | 85.14  | 0.56 | 1.75E-04 | 8.74E-04 |
| 2150 | 3 | F2-3 vs. L2-3 | 254576_at | AT4G19350 | Encodes the major form of the two non-mitochondrial phosphatidylserine decarboxylase. Located at the ER. The mRNA is cell-to-cell mobile.                                                                                                                                                                                                                                                                                                                                                                                                                                                                                                                                                                                                                                                                                                                                                                                                                                                                                                                                             | 105.15 | 186.25 | 0.56 | 2.10E-05 | 1.95E-04 |
| 2151 | 3 | F2-3 vs. L2-3 | 254035_at | AT4G25970 | Encodes a plasma membrane localized leucine-rich repeat receptor kinase involved in brassinosteroid signal transduction. BRI1 ligand is brassinolide which binds at the extracellular domain. Binding results in phosphorylation of the kinase domain which activates the BRI1 protein leading to BR responses. Residue T-1049 and either S-1044 or T-1045 were essential for kinase function in vitro and normal BRI1 signaling in planta. The structure of BRI1 ligand-binding domain has been determined at 2.5A resolution. Although BAK1 and BRI1 alone localize in the plasma membrane, when BAK1 and BRI1 are coexpressed, the heterodimer BAK1/BRI1 they form is localized in the endosome. BRI1 appears to be involved in the autonomous pathway that regulates the transition to flowering, primarily through its effects on FLC expression levels, as uncovered by double mutant analyses. This most likely occurs as a result of BRI1-dependent effects on histone acetylation, but not histone triMeH3K4 methylation, at the FLC locus. The mRNA is cell-to-cell mobile. | 98.73  | 174.77 | 0.56 | 5.58E-04 | 2.04E-03 |
| 2152 | 3 | F2-3 vs. L2-3 | 252890_at | AT4G39400 | Encodes a tRNA methyltransferase that mediates the 2'-O-ribose methylation of selected tRNA species in the anticodon loop. Mutation of this gene compromises plant immunity against bacteria. Transducin/WD40 repeat-like superfamily protein;(source:Araport11)                                                                                                                                                                                                                                                                                                                                                                                                                                                                                                                                                                                                                                                                                                                                                                                                                      | 142.96 | 253.33 | 0.56 | 4.05E-04 | 1.61E-03 |
| 2153 | 3 | F2-3 vs. L2-3 | 251139_at | AT5G01230 | Encodes a component of the putative Arabidopsis THO/TREX complex: THO1 or HPR1 (At5g09860), THO2 (At1g24706), THO3 or TEX1 (At5g56130), THO5 (At5g42920, At1g45233), THO6 (At2g19430), and THO7 (At5g16790, At3g02950). THO/TREX complexes in animals have been implicated in the transport of mRNA precursors. Mutants of THO3/TEX1, THO1, THO6 accumulate reduced amount of small interfering (si)RNA, suggesting a role of the putative Arabidopsis THO/TREX in siRNA biosynthesis.                                                                                                                                                                                                                                                                                                                                                                                                                                                                                                                                                                                                | 106.12 | 188.15 | 0.56 | 4.88E-05 | 3.56E-04 |
| 2154 | 3 | F2-3 vs. L2-3 | 250584_at | AT5G07590 |                                                                                                                                                                                                                                                                                                                                                                                                                                                                                                                                                                                                                                                                                                                                                                                                                                                                                                                                                                                                                                                                                       | 63.69  | 114.68 | 0.56 | 7.35E-05 | 4.71E-04 |
| 2155 | 3 | F2-3 vs. L2-3 | 249181_at | AT5G42920 |                                                                                                                                                                                                                                                                                                                                                                                                                                                                                                                                                                                                                                                                                                                                                                                                                                                                                                                                                                                                                                                                                       | 41.27  | 74.02  | 0.56 | 1.54E-05 | 1.61E-04 |

|                                                                                                                                                                                                                                                                                                                                                                                                                                                                        |   |               |           |           |                                                                                                                                                                                                                                                                                                                                                                                              |        |        |      |          |          |
|------------------------------------------------------------------------------------------------------------------------------------------------------------------------------------------------------------------------------------------------------------------------------------------------------------------------------------------------------------------------------------------------------------------------------------------------------------------------|---|---------------|-----------|-----------|----------------------------------------------------------------------------------------------------------------------------------------------------------------------------------------------------------------------------------------------------------------------------------------------------------------------------------------------------------------------------------------------|--------|--------|------|----------|----------|
| 2156                                                                                                                                                                                                                                                                                                                                                                                                                                                                   | 3 | F2-3 vs. L2-3 | 248694_at | AT5G48340 | hypothetical protein;(source:Araport11)                                                                                                                                                                                                                                                                                                                                                      | 98.08  | 175.76 | 0.56 | 6.34E-04 | 2.25E-03 |
| 2157                                                                                                                                                                                                                                                                                                                                                                                                                                                                   | 3 | F2-3 vs. L2-3 | 248419_at | AT5G51550 | EXORDIUM like 3;(source:Araport11)                                                                                                                                                                                                                                                                                                                                                           | 369.78 | 661.43 | 0.56 | 9.36E-04 | 3.04E-03 |
| 2158                                                                                                                                                                                                                                                                                                                                                                                                                                                                   | 3 | F2-3 vs. L2-3 | 248250_at | AT5G53130 | member of Cyclic nucleotide gated channel family                                                                                                                                                                                                                                                                                                                                             | 199.41 | 355.79 | 0.56 | 6.95E-05 | 4.53E-04 |
| 2159                                                                                                                                                                                                                                                                                                                                                                                                                                                                   | 3 | F2-3 vs. L2-3 | 247054_at | AT5G66730 | C2H2-like zinc finger protein;(source:Araport11)                                                                                                                                                                                                                                                                                                                                             | 28.62  | 51.07  | 0.56 | 5.26E-04 | 1.95E-03 |
| 2160                                                                                                                                                                                                                                                                                                                                                                                                                                                                   | 3 | F2-3 vs. L2-3 | 263113_at | AT1G03150 | Acyl-CoA N-acyltransferases (NAT) superfamily protein;(source:Araport11)                                                                                                                                                                                                                                                                                                                     | 71.05  | 129.89 | 0.55 | 3.71E-04 | 1.51E-03 |
| 2161                                                                                                                                                                                                                                                                                                                                                                                                                                                                   | 3 | F2-3 vs. L2-3 | 265027_at | AT1G24450 | Ribonuclease III family protein;(source:Araport11)                                                                                                                                                                                                                                                                                                                                           | 27.14  | 49.08  | 0.55 | 1.16E-04 | 6.55E-04 |
| Encodes one of the two Arabidopsis homologues to YBR159w encoding a S. cerevisiae beta-ketoacyl reductase (KCR), which catalyzes the first reduction during VLCFA (very long chain fatty acids, >18 carbon) elongation: KCR1 (At1g67730), KCR2 (At1g24470). Complementation of the yeast ybr159Delta mutant demonstrated that the two KCR proteins are divergent and that only AtKCR1 can restore heterologous elongase activity similar to the native yeast KCR gene. |   |               |           |           |                                                                                                                                                                                                                                                                                                                                                                                              | 20.13  | 36.55  | 0.55 | 1.25E-04 | 6.86E-04 |
| 2162                                                                                                                                                                                                                                                                                                                                                                                                                                                                   | 3 | F2-3 vs. L2-3 | 265012_at | AT1G24470 | 5-3 exonuclease family protein;(source:Araport11)                                                                                                                                                                                                                                                                                                                                            | 74.53  | 134.61 | 0.55 | 6.02E-04 | 2.16E-03 |
| 2163                                                                                                                                                                                                                                                                                                                                                                                                                                                                   | 3 | F2-3 vs. L2-3 | 259928_at | AT1G34380 | Encodes a protein that is highly methylated in a WT DML background.                                                                                                                                                                                                                                                                                                                          | 28.84  | 52.43  | 0.55 | 9.53E-04 | 3.09E-03 |
| 2164                                                                                                                                                                                                                                                                                                                                                                                                                                                                   | 3 | F2-3 vs. L2-3 | 262257_at | AT1G53860 | zinc finger MYND domain protein;(source:Araport11)                                                                                                                                                                                                                                                                                                                                           | 157.88 | 287.83 | 0.55 | 3.01E-04 | 1.30E-03 |
| Origin Recognition Complex subunit 4. Involved in the initiation of DNA replication. Regulated transcriptionally during cell cycle, peaking at G1/S-phase. Target of E2F/DF family of transcription factors. Interacts with all ORC subunits except ORC1b.                                                                                                                                                                                                             |   |               |           |           |                                                                                                                                                                                                                                                                                                                                                                                              | 22.19  | 40.50  | 0.55 | 5.27E-04 | 1.95E-03 |
| 2166                                                                                                                                                                                                                                                                                                                                                                                                                                                                   | 3 | F2-3 vs. L2-3 | 262201_at | AT2G01120 | ubiquitin conjugating enzyme UBC2. Homolog of the yeast RAD6 gene.                                                                                                                                                                                                                                                                                                                           | 329.61 | 597.49 | 0.55 | 2.75E-04 | 1.21E-03 |
| 2167                                                                                                                                                                                                                                                                                                                                                                                                                                                                   | 3 | F2-3 vs. L2-3 | 267484_at | AT2G02760 | Encodes a protein belonging to the subgroup of HMGB (high mobility group B) proteins that have a distinctive DNA-binding motif, the HMG-box domain. The motif confers non-sequence specific interaction with linear DNA and structure-specific binding to distorted DNA sites. The HMGB proteins are involved in the assembly of nucleoprotein complexes. Can be phosphorylated by CK2alpha. | 130.75 | 236.35 | 0.55 | 8.62E-05 | 5.29E-04 |
| 2168                                                                                                                                                                                                                                                                                                                                                                                                                                                                   | 3 | F2-3 vs. L2-3 | 263074_at | AT2G17560 | Encodes AtOEP16, a 16-KDa plastid outer membrane protein involved in plastid import of protochlorophyllide oxidoreductase A. Predominantly expressed in leaves and is also inducible by cold treatment.                                                                                                                                                                                      | 322.09 | 583.49 | 0.55 | 9.76E-05 | 5.77E-04 |
| 2169                                                                                                                                                                                                                                                                                                                                                                                                                                                                   | 3 | F2-3 vs. L2-3 | 266225_at | AT2G28900 | ROTUNDIFOLIA like 8;(source:Araport11)                                                                                                                                                                                                                                                                                                                                                       | 26.81  | 48.60  | 0.55 | 3.68E-04 | 1.50E-03 |
| 2170                                                                                                                                                                                                                                                                                                                                                                                                                                                                   | 3 | F2-3 vs. L2-3 | 267591_at | AT2G39705 | Major facilitator superfamily protein;(source:Araport11)                                                                                                                                                                                                                                                                                                                                     | 52.40  | 95.32  | 0.55 | 5.67E-04 | 2.06E-03 |
| 2171                                                                                                                                                                                                                                                                                                                                                                                                                                                                   | 3 | F2-3 vs. L2-3 | 259005_at | AT3G01930 | Encodes a Golgi-localized hydroxyproline-O-galactosyltransferase. Mutants display multiple phenotypes including reduced root hair growth and reduced seed coat mucilage.                                                                                                                                                                                                                     | 39.23  | 70.79  | 0.55 | 1.87E-04 | 9.06E-04 |
| 2172                                                                                                                                                                                                                                                                                                                                                                                                                                                                   | 3 | F2-3 vs. L2-3 | 258853_at | AT3G06440 | mutant is Dwarfed and shows defects in cell elongation; Cellulose deficient; Plasma Membrane Protein                                                                                                                                                                                                                                                                                         | 135.96 | 248.26 | 0.55 | 8.55E-04 | 2.84E-03 |
| 2173                                                                                                                                                                                                                                                                                                                                                                                                                                                                   | 3 | F2-3 vs. L2-3 | 258666_at | AT3G08550 | flavin mononucleotide flavoprotein involved in salt and osmotic tolerance HAL3A encodes for phosphopantothenoylecysteine decarboxylase being involved in Coenzyme A biosynthesis. HAL3A is predominant over another gene with the presumably same function (HAL3B).                                                                                                                          | 73.61  | 134.38 | 0.55 | 4.29E-04 | 1.68E-03 |
| 2174                                                                                                                                                                                                                                                                                                                                                                                                                                                                   | 3 | F2-3 vs. L2-3 | 257897_at | AT3G18030 | kinase superfamily with octicosapeptide/Phox/Bem1p domain-containing protein;(source:Araport11)                                                                                                                                                                                                                                                                                              | 12.04  | 21.77  | 0.55 | 1.93E-04 | 9.30E-04 |
| 2175                                                                                                                                                                                                                                                                                                                                                                                                                                                                   | 3 | F2-3 vs. L2-3 | 252469_at | AT3G46920 | anaphase-promoting complex or cyclosome subunit                                                                                                                                                                                                                                                                                                                                              | 76.72  | 139.05 | 0.55 | 3.94E-05 | 3.06E-04 |
| 2176                                                                                                                                                                                                                                                                                                                                                                                                                                                                   | 3 | F2-3 vs. L2-3 | 252349_at | AT3G48150 | encodes a MADS-box containing protein likely to be a transcription factor that is expressed in endosperm and developing gametophytes. The protein sequence is most similar to that of AGL15, which is expressed in developing embryos.                                                                                                                                                       | 93.77  | 169.43 | 0.55 | 1.57E-04 | 8.09E-04 |
| 2177                                                                                                                                                                                                                                                                                                                                                                                                                                                                   | 3 | F2-3 vs. L2-3 | 251623_at | AT3G57390 | Represses photomorphogenesis and induces skotomorphogenesis in the dark. A component of the COP9 signalosome complex.                                                                                                                                                                                                                                                                        | 113.18 | 205.70 | 0.55 | 1.39E-04 | 7.42E-04 |
| 2178                                                                                                                                                                                                                                                                                                                                                                                                                                                                   | 3 | F2-3 vs. L2-3 | 245255_at | AT4G14110 | Origin Recognition Complex subunit 5. Involved in the initiation of DNA replication. Interacts strongly with all ORC subunits.                                                                                                                                                                                                                                                               | 50.76  | 91.55  | 0.55 | 2.35E-05 | 2.11E-04 |
| 2179                                                                                                                                                                                                                                                                                                                                                                                                                                                                   | 3 | F2-3 vs. L2-3 | 253703_at | AT4G29910 | small nuclear ribonucleoprotein F;(source:Araport11)                                                                                                                                                                                                                                                                                                                                         | 292.75 | 533.79 | 0.55 | 6.43E-04 | 2.27E-03 |
| 2180                                                                                                                                                                                                                                                                                                                                                                                                                                                                   | 3 | F2-3 vs. L2-3 | 253668_at | AT4G30220 | Encodes one of the 36 carboxylate clamp (CC)-tetratricopeptide repeat (TPR) proteins (Prasad 2010, Pubmed ID: 20856808). Interacts with Hsp90/Hsp70 as co-chaperone.                                                                                                                                                                                                                         | 167.93 | 307.76 | 0.55 | 2.33E-04 | 1.07E-03 |
| 2181                                                                                                                                                                                                                                                                                                                                                                                                                                                                   | 3 | F2-3 vs. L2-3 | 253633_at | AT4G30480 | O-Glycosyl hydrolases family 17 protein;(source:Araport11)                                                                                                                                                                                                                                                                                                                                   | 39.97  | 73.06  | 0.55 | 5.19E-04 | 1.93E-03 |
| 2182                                                                                                                                                                                                                                                                                                                                                                                                                                                                   | 3 | F2-3 vs. L2-3 | 247826_at | AT5G58480 | Encodes a homolog of the potato p24 protein. Binds single strand telomeric repeats. Negatively regulates telomerase activity and telomere length.                                                                                                                                                                                                                                            | 79.95  | 147.52 | 0.54 | 2.12E-04 | 9.99E-04 |
| 2183                                                                                                                                                                                                                                                                                                                                                                                                                                                                   | 3 | F2-3 vs. L2-3 | 261493_at | AT1G14410 | Encodes an arabinosyltransferase that modifies extensin proteins in root hair cells.                                                                                                                                                                                                                                                                                                         | 26.24  | 48.25  | 0.54 | 2.33E-04 | 1.07E-03 |
| 2184                                                                                                                                                                                                                                                                                                                                                                                                                                                                   | 3 | F2-3 vs. L2-3 | 260665_at | AT1G19360 |                                                                                                                                                                                                                                                                                                                                                                                              |        |        |      |          |          |



|      |   |               |            |           |                                                                                                                                                                                                                                                                                                                                                                                                                                                                                                                                                                                                                                                                                                                                                                       |         |         |      |          |          |
|------|---|---------------|------------|-----------|-----------------------------------------------------------------------------------------------------------------------------------------------------------------------------------------------------------------------------------------------------------------------------------------------------------------------------------------------------------------------------------------------------------------------------------------------------------------------------------------------------------------------------------------------------------------------------------------------------------------------------------------------------------------------------------------------------------------------------------------------------------------------|---------|---------|------|----------|----------|
| 2185 | 3 | F2-3 vs. L2-3 | 260257_at  | AT1G74340 | Encodes a subunit of the dolichol phosphate mannanase synthase (DPMS) complex that may serve as membrane anchors for the catalytic core, DPMS1, or provide catalytic assistance. It is localized in the ER and mediates isoprenyl-linked glycan biogenesis.                                                                                                                                                                                                                                                                                                                                                                                                                                                                                                           | 41.00   | 76.10   | 0.54 | 3.74E-04 | 1.52E-03 |
| 2186 | 3 | F2-3 vs. L2-3 | 263624_at  | AT2G04700 |                                                                                                                                                                                                                                                                                                                                                                                                                                                                                                                                                                                                                                                                                                                                                                       | 253.47  | 473.38  | 0.54 | 4.82E-04 | 1.82E-03 |
| 2187 | 3 | F2-3 vs. L2-3 | 266037_at  | AT2G05940 | Encodes a receptor-like cytoplasmic kinase that phosphorylates the host target RIN4, leading to the activation of a plant innate immune receptor RPM1.                                                                                                                                                                                                                                                                                                                                                                                                                                                                                                                                                                                                                | 73.12   | 134.88  | 0.54 | 9.88E-04 | 3.19E-03 |
| 2188 | 3 | F2-3 vs. L2-3 | 263564_s_a | AT2G15400 | Non-catalytic subunit of Nuclear DNA-dependent RNA polymerase V; homologous to budding yeast RPB3 and the E. coli RNA polymerase alpha subunit. A closely related paralog, At2g15430 can substitute for At2g15400 in the context of Pol V and encodes the equivalent subunit of Pol II and Pol IV.                                                                                                                                                                                                                                                                                                                                                                                                                                                                    | 43.63   | 80.73   | 0.54 | 7.89E-05 | 4.96E-04 |
| 2189 | 3 | F2-3 vs. L2-3 | 267012_at  | AT2G39220 | PATATIN-like protein 6;(source:Araport11)                                                                                                                                                                                                                                                                                                                                                                                                                                                                                                                                                                                                                                                                                                                             | 438.40  | 815.96  | 0.54 | 2.47E-05 | 2.17E-04 |
| 2190 | 3 | F2-3 vs. L2-3 | 263990_at  | AT2G42810 | Encodes a phytochrome-specific type 5 serine/threonine protein phosphatase. It dephosphorylates active Pfr-phytochromes. Controls light signal flux by enhancing phytochrome stability and affinity for a signal transducer. The gene is alternately spliced. This variant is an integral membrane protein localized to the ER and nuclear envelope. Belongs to one of the 36 carboxylate clamp (CC)-tetratricopeptide repeat (TPR) proteins (Prasad 2010, Pubmed ID: 20856808) with potential to interact with Hsp90/Hsp70 as co-chaperones. It also regulates tetrapyrrole biosynthesis through the accumulation of Mg-ProtoIX and acts as a negative regulator of photosynthesis associated nuclear gene expression during chloroplast biogenesis and development. | 68.86   | 126.88  | 0.54 | 9.34E-05 | 5.59E-04 |
| 2191 | 3 | F2-3 vs. L2-3 | 258206_at  | AT3G14010 | hydroxyproline-rich glycoprotein family protein, similar to Mrs16p (GI:2737884) (Saccharomyces cerevisiae); weak similarity to ataxin-2 related protein (GI:1679686) (Homo sapiens). Included in a family of CTC interacting domain proteins found to interact with PAB2.                                                                                                                                                                                                                                                                                                                                                                                                                                                                                             | 26.74   | 49.60   | 0.54 | 7.20E-05 | 4.64E-04 |
| 2192 | 3 | F2-3 vs. L2-3 | 252297_at  | AT3G48930 | Nucleic acid-binding, OB-fold-like protein;(source:Araport11)                                                                                                                                                                                                                                                                                                                                                                                                                                                                                                                                                                                                                                                                                                         | 219.50  | 408.46  | 0.54 | 6.24E-04 | 2.23E-03 |
| 2193 | 3 | F2-3 vs. L2-3 | 253687_at  | AT4G29520 | SES1 is an ER localized chaperone involved in salt and heat stress response.                                                                                                                                                                                                                                                                                                                                                                                                                                                                                                                                                                                                                                                                                          | 132.58  | 244.42  | 0.54 | 7.19E-04 | 2.48E-03 |
| 2194 | 3 | F2-3 vs. L2-3 | 247743_at  | AT5G59010 | kinase with tetratricopeptide repeat domain-containing protein;(source:Araport11)                                                                                                                                                                                                                                                                                                                                                                                                                                                                                                                                                                                                                                                                                     | 65.36   | 120.83  | 0.54 | 5.78E-04 | 2.09E-03 |
| 2195 | 3 | F2-3 vs. L2-3 | 247583_at  | AT5G60750 | Encodes a chloroplast endoproteinase, SNOWY COTYLEDON4 (SCO4), required for photosynthetic acclimation to higher light intensities.                                                                                                                                                                                                                                                                                                                                                                                                                                                                                                                                                                                                                                   | 19.96   | 37.24   | 0.54 | 3.99E-04 | 1.59E-03 |
| 2196 | 3 | F2-3 vs. L2-3 | 247609_at  | AT5G60940 | Member of CstF complex.                                                                                                                                                                                                                                                                                                                                                                                                                                                                                                                                                                                                                                                                                                                                               | 36.31   | 66.75   | 0.54 | 5.91E-04 | 2.13E-03 |
| 2197 | 3 | F2-3 vs. L2-3 | 261277_at  | AT1G20230 | Pentatricopeptide repeat (PPR) superfamily protein;(source:Araport11)                                                                                                                                                                                                                                                                                                                                                                                                                                                                                                                                                                                                                                                                                                 | 90.70   | 172.75  | 0.53 | 2.32E-04 | 1.07E-03 |
| 2198 | 3 | F2-3 vs. L2-3 | 261802_at  | AT1G30545 | S-adenosyl-L-methionine-dependent methyltransferase superfamily protein;(source:Araport11)                                                                                                                                                                                                                                                                                                                                                                                                                                                                                                                                                                                                                                                                            | 24.94   | 47.29   | 0.53 | 3.11E-04 | 1.33E-03 |
| 2199 | 3 | F2-3 vs. L2-3 | 256460_at  | AT1G36240 | Ribosomal protein L7Ae/L30e/S12e/Gadd45 family protein;(source:Araport11)                                                                                                                                                                                                                                                                                                                                                                                                                                                                                                                                                                                                                                                                                             | 1064.22 | 1999.55 | 0.53 | 1.46E-04 | 7.65E-04 |
| 2200 | 3 | F2-3 vs. L2-3 | 260644_at  | AT1G53290 | Galactosyltransferase family protein;(source:Araport11)                                                                                                                                                                                                                                                                                                                                                                                                                                                                                                                                                                                                                                                                                                               | 72.68   | 138.12  | 0.53 | 3.53E-04 | 1.45E-03 |
| 2201 | 3 | F2-3 vs. L2-3 | 265760_at  | AT2G01220 | Nucleotidyl transferase superfamily protein;(source:Araport11)                                                                                                                                                                                                                                                                                                                                                                                                                                                                                                                                                                                                                                                                                                        | 28.16   | 53.34   | 0.53 | 8.06E-04 | 2.71E-03 |
| 2202 | 3 | F2-3 vs. L2-3 | 266182_at  | AT2G02370 | SNARE associated Golgi protein family;(source:Araport11)                                                                                                                                                                                                                                                                                                                                                                                                                                                                                                                                                                                                                                                                                                              | 92.28   | 174.94  | 0.53 | 5.24E-05 | 3.75E-04 |
| 2203 | 3 | F2-3 vs. L2-3 | 266226_at  | AT2G28740 | histone 4                                                                                                                                                                                                                                                                                                                                                                                                                                                                                                                                                                                                                                                                                                                                                             | 21.23   | 40.27   | 0.53 | 5.18E-04 | 1.93E-03 |
| 2204 | 3 | F2-3 vs. L2-3 | 266922_s_a | AT2G45950 | SKP1-like 20;(source:Araport11)                                                                                                                                                                                                                                                                                                                                                                                                                                                                                                                                                                                                                                                                                                                                       | 96.97   | 184.33  | 0.53 | 2.06E-05 | 1.93E-04 |
| 2205 | 3 | F2-3 vs. L2-3 | 259029_at  | AT3G09300 | OSBP(oxysterol binding protein)-related protein 3B;(source:Araport11)                                                                                                                                                                                                                                                                                                                                                                                                                                                                                                                                                                                                                                                                                                 | 163.48  | 308.95  | 0.53 | 5.26E-04 | 1.95E-03 |
| 2206 | 3 | F2-3 vs. L2-3 | 252335_at  | AT3G48860 | coiled-coil protein;(source:Araport11)                                                                                                                                                                                                                                                                                                                                                                                                                                                                                                                                                                                                                                                                                                                                | 32.97   | 61.87   | 0.53 | 2.70E-04 | 1.19E-03 |
| 2207 | 3 | F2-3 vs. L2-3 | 251802_at  | AT3G55380 | ubiquitin-conjugating enzyme 14;(source:Araport11)                                                                                                                                                                                                                                                                                                                                                                                                                                                                                                                                                                                                                                                                                                                    | 83.41   | 156.37  | 0.53 | 8.10E-06 | 1.04E-04 |
| 2208 | 3 | F2-3 vs. L2-3 | 251446_at  | AT3G59840 | allyl alcohol dehydrogenase-like protein;(source:Araport11)                                                                                                                                                                                                                                                                                                                                                                                                                                                                                                                                                                                                                                                                                                           | 34.54   | 65.26   | 0.53 | 7.01E-04 | 2.43E-03 |
| 2209 | 3 | F2-3 vs. L2-3 | 251271_at  | AT3G62050 | Putative endonuclease or glycosyl hydrolase;(source:Araport11)                                                                                                                                                                                                                                                                                                                                                                                                                                                                                                                                                                                                                                                                                                        | 17.36   | 32.99   | 0.53 | 7.19E-05 | 4.64E-04 |
| 2210 | 3 | F2-3 vs. L2-3 | 245254_at  | AT4G14680 | Encodes one of three A. thaliana ATP-sulfurylases. APS is the first enzyme of sulfate assimilation that catalyzes the formation of adenosine-5'-phosphosulfate from ATP and sulfate.                                                                                                                                                                                                                                                                                                                                                                                                                                                                                                                                                                                  | 30.96   | 58.24   | 0.53 | 2.31E-04 | 1.06E-03 |
| 2211 | 3 | F2-3 vs. L2-3 | 254359_at  | AT4G22360 | SWIB complex BAF60b domain-containing protein;(source:Araport11)                                                                                                                                                                                                                                                                                                                                                                                                                                                                                                                                                                                                                                                                                                      | 76.13   | 144.49  | 0.53 | 9.70E-06 | 1.16E-04 |
| 2212 | 3 | F2-3 vs. L2-3 | 253984_at  | AT4G26590 | oligopeptide transporter                                                                                                                                                                                                                                                                                                                                                                                                                                                                                                                                                                                                                                                                                                                                              | 82.31   | 156.10  | 0.53 | 1.67E-04 | 8.43E-04 |
| 2213 | 3 | F2-3 vs. L2-3 | 252871_at  | AT4G40000 | S-adenosyl-L-methionine-dependent methyltransferases superfamily protein;(source:Araport11)                                                                                                                                                                                                                                                                                                                                                                                                                                                                                                                                                                                                                                                                           | 89.74   | 170.82  | 0.53 | 1.79E-04 | 8.84E-04 |
| 2214 | 3 | F2-3 vs. L2-3 | 251040_at  | AT5G02250 | Encodes a exoribonuclease involved in rRNA processing in mitochondria and chloroplasts.Loss of function mutations are pale green and require supplementation with sucrose for germination and early development. Plants are pale green due to defects in chloroplast biogenesis.                                                                                                                                                                                                                                                                                                                                                                                                                                                                                      | 34.45   | 65.61   | 0.53 | 3.58E-04 | 1.47E-03 |

|      |   |               |           |           |                                                                                                                                                                                                                                                                                                                                                                                                                                                                                                                                                                                                                                                                                                                               |        |        |      |          |          |
|------|---|---------------|-----------|-----------|-------------------------------------------------------------------------------------------------------------------------------------------------------------------------------------------------------------------------------------------------------------------------------------------------------------------------------------------------------------------------------------------------------------------------------------------------------------------------------------------------------------------------------------------------------------------------------------------------------------------------------------------------------------------------------------------------------------------------------|--------|--------|------|----------|----------|
| 2215 | 3 | F2-3 vs. L2-3 | 250284_at | AT5G13290 | Encodes a protein with predicted Ser/Thr kinase activity and membrane localization that is involved in the CLV3 signaling pathway that represses WUS expression in the meristem. Loss of function of CRN can suppress the phenotype caused by overexpression of CLV3. SOL2 isolated as a suppressor of root- specific overexpression of CLE19, a clavata3 like gene. sol2 partially suppresses the short root phenotype caused by CLE19 overexpression. Mutant flowers have extra carpels. Member of the R2R3 factor gene family that acts as a cell-specific repressor of quiescent center (QC) divisions in the primary root, acting through the BR signaling pathway. Works with BES1 to regulate QC division in the root. | 88.81  | 166.90 | 0.53 | 5.51E-05 | 3.89E-04 |
| 2216 | 3 | F2-3 vs. L2-3 | 250051_at | AT5G17800 | AtOEP80 is paralog to the chloroplastic protein translocation channel Toc75. Mutations in this locus result in embryo lethality.                                                                                                                                                                                                                                                                                                                                                                                                                                                                                                                                                                                              | 46.92  | 88.55  | 0.53 | 3.68E-04 | 1.50E-03 |
| 2217 | 3 | F2-3 vs. L2-3 | 245914_at | AT5G19620 | 30S ribosomal protein;(source:Araport11)                                                                                                                                                                                                                                                                                                                                                                                                                                                                                                                                                                                                                                                                                      | 66.59  | 126.74 | 0.53 | 6.46E-04 | 2.28E-03 |
| 2218 | 3 | F2-3 vs. L2-3 | 249742_at | AT5G24490 | sn-glycerol-3-phosphate 2-O-acyltransferase. Expressed in flower buds and siliques. Homozygous mutant plants are male sterile.                                                                                                                                                                                                                                                                                                                                                                                                                                                                                                                                                                                                | 115.47 | 218.62 | 0.53 | 9.11E-04 | 2.99E-03 |
| 2219 | 3 | F2-3 vs. L2-3 | 262630_at | AT1G06520 | Encodes a nuclear UBX-containing protein that can bridge ubiquitin to AtCDC48A.                                                                                                                                                                                                                                                                                                                                                                                                                                                                                                                                                                                                                                               | 19.53  | 37.29  | 0.52 | 3.85E-04 | 1.55E-03 |
| 2220 | 3 | F2-3 vs. L2-3 | 260782_at | AT1G14570 | oligouridylate-binding protein 1A;(source:Araport11)                                                                                                                                                                                                                                                                                                                                                                                                                                                                                                                                                                                                                                                                          | 181.00 | 346.81 | 0.52 | 9.62E-04 | 3.12E-03 |
| 2221 | 3 | F2-3 vs. L2-3 | 263160_at | AT1G54080 |                                                                                                                                                                                                                                                                                                                                                                                                                                                                                                                                                                                                                                                                                                                               | 77.34  | 149.07 | 0.52 | 1.96E-05 | 1.89E-04 |
| 2222 | 3 | F2-3 vs. L2-3 | 257547_at | AT3G13000 | ubiquinone biosynthesis protein (Protein of unknown function, DUF547);(source:Araport11)                                                                                                                                                                                                                                                                                                                                                                                                                                                                                                                                                                                                                                      | 16.03  | 31.07  | 0.52 | 5.25E-04 | 1.95E-03 |
| 2223 | 3 | F2-3 vs. L2-3 | 256889_at | AT3G24010 | ING1 encodes a member of the Inhibitor of Growth family of nuclear-localized PhD domain containing homeodomain proteins. Binds to H3K4 di or trimethylated DNA.                                                                                                                                                                                                                                                                                                                                                                                                                                                                                                                                                               | 93.07  | 180.46 | 0.52 | 6.16E-04 | 2.20E-03 |
| 2224 | 3 | F2-3 vs. L2-3 | 245404_at | AT4G17610 | tRNA/rRNA methyltransferase (SpoU) family protein;(source:Araport11)                                                                                                                                                                                                                                                                                                                                                                                                                                                                                                                                                                                                                                                          | 79.34  | 152.41 | 0.52 | 1.20E-04 | 6.65E-04 |
| 2225 | 3 | F2-3 vs. L2-3 | 253946_at | AT4G26790 | GDSL-motif esterase/acyltransferase/lipase. Enzyme group with broad substrate specificity that may catalyze acyltransfer or hydrolase reactions with lipid and non-lipid substrates.                                                                                                                                                                                                                                                                                                                                                                                                                                                                                                                                          | 20.26  | 39.13  | 0.52 | 9.60E-05 | 5.69E-04 |
| 2226 | 3 | F2-3 vs. L2-3 | 250150_at | AT5G14710 | proteasome assembly chaperone-like protein;(source:Araport11)                                                                                                                                                                                                                                                                                                                                                                                                                                                                                                                                                                                                                                                                 | 69.99  | 133.50 | 0.52 | 7.64E-04 | 2.59E-03 |
| 2227 | 3 | F2-3 vs. L2-3 | 249398_at | AT5G40250 | RING/U-box superfamily protein;(source:Araport11)                                                                                                                                                                                                                                                                                                                                                                                                                                                                                                                                                                                                                                                                             | 67.13  | 129.69 | 0.52 | 8.30E-06 | 1.05E-04 |
| 2228 | 3 | F2-3 vs. L2-3 | 248861_at | AT5G46700 | Encodes a transmembrane protein of the tetraspanin (TET) family, one of 17 members found in Arabidopsis. Double mutant analysis showed that TRN1 and TRN2 act in the same pathway. Required for the maintenance of both the radial pattern of tissue differentiation in the root and for the subsequent circumferential pattern within the epidermis.                                                                                                                                                                                                                                                                                                                                                                         | 20.16  | 38.48  | 0.52 | 1.65E-04 | 8.35E-04 |
| 2229 | 3 | F2-3 vs. L2-3 | 248684_at | AT5G48485 | Encodes a putative apoplastic lipid transfer protein that is involved in systemic acquired resistance. Mutants in this gene exhibit wild-type local resistance to avirulent and virulent Pseudomonas syringae, but pathogenesis-related gene expression is abolished in uninoculated distant leaves and fail to develop SAR to virulent Pseudomonas or Peronospora parasitica. DIR1 protein is cell-to-cell mobile and is transported via phloem sap.                                                                                                                                                                                                                                                                         | 23.57  | 45.71  | 0.52 | 6.92E-05 | 4.53E-04 |
| 2230 | 3 | F2-3 vs. L2-3 | 260949_at | AT1G06110 | SKP1/ASK-interacting protein 16;(source:Araport11)                                                                                                                                                                                                                                                                                                                                                                                                                                                                                                                                                                                                                                                                            | 191.66 | 375.11 | 0.51 | 7.49E-04 | 2.55E-03 |
| 2231 | 3 | F2-3 vs. L2-3 | 264674_at | AT1G09815 | polymerase delta 4;(source:Araport11)                                                                                                                                                                                                                                                                                                                                                                                                                                                                                                                                                                                                                                                                                         | 55.33  | 107.71 | 0.51 | 1.74E-05 | 1.76E-04 |
| 2232 | 3 | F2-3 vs. L2-3 | 264441_at | AT1G27435 | hypothetical protein;(source:Araport11)                                                                                                                                                                                                                                                                                                                                                                                                                                                                                                                                                                                                                                                                                       | 232.42 | 452.20 | 0.51 | 1.64E-04 | 8.34E-04 |
| 2233 | 3 | F2-3 vs. L2-3 | 262514_at | AT1G34190 | Encodes a NAC domain transcription factor that regulates the mitochondrial retrograde response and coordinates organellar functions and stress responses.                                                                                                                                                                                                                                                                                                                                                                                                                                                                                                                                                                     | 150.40 | 297.77 | 0.51 | 1.40E-06 | 3.16E-05 |
| 2234 | 3 | F2-3 vs. L2-3 | 264418_at | AT1G43190 | polypyrimidine tract-binding protein 3;(source:Araport11)                                                                                                                                                                                                                                                                                                                                                                                                                                                                                                                                                                                                                                                                     | 223.50 | 439.37 | 0.51 | 8.78E-05 | 5.35E-04 |
| 2235 | 3 | F2-3 vs. L2-3 | 261628_at | AT1G50000 | methyltransferase;(source:Araport11)                                                                                                                                                                                                                                                                                                                                                                                                                                                                                                                                                                                                                                                                                          | 34.28  | 66.62  | 0.51 | 2.71E-04 | 1.19E-03 |
| 2236 | 3 | F2-3 vs. L2-3 | 263590_at | AT2G01820 | Leucine-rich repeat protein kinase family protein;(source:Araport11)                                                                                                                                                                                                                                                                                                                                                                                                                                                                                                                                                                                                                                                          | 370.32 | 729.78 | 0.51 | 1.67E-04 | 8.43E-04 |
| 2237 | 3 | F2-3 vs. L2-3 | 264001_at | AT2G22420 | Encodes a cell wall-localized class III peroxidase that is directly regulated by the MADS-box transcription factor AGL15 and is involved in lignified tissue formation.                                                                                                                                                                                                                                                                                                                                                                                                                                                                                                                                                       | 39.51  | 77.15  | 0.51 | 4.33E-04 | 1.69E-03 |
| 2238 | 3 | F2-3 vs. L2-3 | 259192_at | AT3G01740 | Mitochondrial ribosomal protein L37;(source:Araport11)                                                                                                                                                                                                                                                                                                                                                                                                                                                                                                                                                                                                                                                                        | 42.64  | 83.06  | 0.51 | 8.00E-06 | 1.03E-04 |
| 2239 | 3 | F2-3 vs. L2-3 | 258921_at | AT3G10500 | Encodes a transcriptional activator that is associated with the plasma membrane in a dormant form and is proteolytically cleaved to create a form that can enter the nucleus. It is thought to promote ROS production by binding directly to the promoters of genes encoding ROS biosynthetic enzymes during drought-induced leaf senescence.The mRNA is cell-to-cell mobile.                                                                                                                                                                                                                                                                                                                                                 | 144.60 | 282.29 | 0.51 | 1.35E-05 | 1.48E-04 |
| 2240 | 3 | F2-3 vs. L2-3 | 256626_at | AT3G20015 | Eukaryotic aspartyl protease family protein;(source:Araport11)                                                                                                                                                                                                                                                                                                                                                                                                                                                                                                                                                                                                                                                                | 41.42  | 81.51  | 0.51 | 8.95E-04 | 2.95E-03 |
| 2241 | 3 | F2-3 vs. L2-3 | 251425_at | AT3G60210 | GroES-like family protein;(source:Araport11)                                                                                                                                                                                                                                                                                                                                                                                                                                                                                                                                                                                                                                                                                  | 222.18 | 438.83 | 0.51 | 3.34E-05 | 2.69E-04 |
| 2242 | 3 | F2-3 vs. L2-3 | 255807_at | AT4G10270 | Member of the wound-induced polypeptide (WIP) family.                                                                                                                                                                                                                                                                                                                                                                                                                                                                                                                                                                                                                                                                         | 17.80  | 34.99  | 0.51 | 3.77E-04 | 1.52E-03 |

|      |   |               |           |           |                                                                                                                                                                                                                                                                                                                                                     |        |         |      |          |          |
|------|---|---------------|-----------|-----------|-----------------------------------------------------------------------------------------------------------------------------------------------------------------------------------------------------------------------------------------------------------------------------------------------------------------------------------------------------|--------|---------|------|----------|----------|
| 2243 | 3 | F2-3 vs. L2-3 | 254991_at | AT4G10620 | P-loop containing nucleoside triphosphate hydrolases superfamily protein;(source:Araport11)                                                                                                                                                                                                                                                         | 93.61  | 182.16  | 0.51 | 1.81E-04 | 8.86E-04 |
| 2244 | 3 | F2-3 vs. L2-3 | 254529_at | AT4G19540 | Encodes a iron-sulfur protein required for NADH dehydrogenase.                                                                                                                                                                                                                                                                                      | 64.36  | 127.26  | 0.51 | 1.64E-04 | 8.35E-04 |
| 2245 | 3 | F2-3 vs. L2-3 | 253324_at | AT4G33940 | RING/U-box superfamily protein;(source:Araport11)                                                                                                                                                                                                                                                                                                   | 55.49  | 109.82  | 0.51 | 5.28E-05 | 3.78E-04 |
| 2246 | 3 | F2-3 vs. L2-3 | 252968_at | AT4G38890 | FMN-linked oxidoreductases superfamily protein;(source:Araport11)                                                                                                                                                                                                                                                                                   | 206.61 | 407.02  | 0.51 | 7.01E-05 | 4.56E-04 |
| 2247 | 3 | F2-3 vs. L2-3 | 245885_at | AT5G09440 | EXORDIUM like 4;(source:Araport11)                                                                                                                                                                                                                                                                                                                  | 471.46 | 922.32  | 0.51 | 4.20E-05 | 3.21E-04 |
| 2248 | 3 | F2-3 vs. L2-3 | 245965_at | AT5G19730 | Pectin lyase-like superfamily protein;(source:Araport11)                                                                                                                                                                                                                                                                                            | 70.37  | 137.69  | 0.51 | 1.05E-04 | 6.09E-04 |
| 2249 | 3 | F2-3 vs. L2-3 | 247606_at | AT5G61000 | Replication factor-A protein 1-like protein;(source:Araport11)                                                                                                                                                                                                                                                                                      | 84.54  | 166.02  | 0.51 | 3.38E-04 | 1.41E-03 |
| 2250 | 3 | F2-3 vs. L2-3 | 262501_at | AT1G21690 | ATPase family associated with various cellular activities (AAA);(source:Araport11)                                                                                                                                                                                                                                                                  | 85.67  | 169.65  | 0.50 | 1.61E-04 | 8.23E-04 |
| 2251 | 3 | F2-3 vs. L2-3 | 257403_at | AT1G62520 | sulfated surface-like glycoprotein;(source:Araport11)                                                                                                                                                                                                                                                                                               | 14.32  | 28.40   | 0.50 | 9.90E-05 | 5.82E-04 |
| 2252 | 3 | F2-3 vs. L2-3 | 262919_at | AT1G79380 | Encodes a ubiquitin ligase that is an essential upstream modulator of JA signaling in response to various stimuli.<br>A member of EXO70 gene family, putative exocyst subunits, conserved in land plants. Arabidopsis thaliana contains 23 putative EXO70 genes, which can be classified into eight clusters on the phylogenetic tree.              | 156.39 | 314.91  | 0.50 | 6.71E-04 | 2.35E-03 |
| 2253 | 3 | F2-3 vs. L2-3 | 263439_at | AT2G28650 | Histone superfamily protein;(source:Araport11)                                                                                                                                                                                                                                                                                                      | 44.98  | 90.87   | 0.50 | 6.71E-04 | 2.35E-03 |
| 2254 | 3 | F2-3 vs. L2-3 | 265960_at | AT2G37470 | NADH-ubiquinone oxidoreductase-like protein;(source:Araport11)                                                                                                                                                                                                                                                                                      | 23.75  | 47.49   | 0.50 | 3.15E-05 | 2.59E-04 |
| 2255 | 3 | F2-3 vs. L2-3 | 258846_at | AT3G03070 | hypothetical protein (DUF868);(source:Araport11)                                                                                                                                                                                                                                                                                                    | 11.67  | 23.11   | 0.50 | 3.69E-04 | 1.50E-03 |
| 2256 | 3 | F2-3 vs. L2-3 | 259093_at | AT3G04860 |                                                                                                                                                                                                                                                                                                                                                     | 49.67  | 98.95   | 0.50 | 6.28E-04 | 2.23E-03 |
| 2257 | 3 | F2-3 vs. L2-3 | 259225_at | AT3G07590 | SmD1a is one of two Yeast SmD1 orthologs, lower levels than SmD1b.It is localized to the nucleus and may play a minor role in RNA splicing and indirectly facilitating PTGS.                                                                                                                                                                        | 31.27  | 62.48   | 0.50 | 1.33E-04 | 7.21E-04 |
| 2258 | 3 | F2-3 vs. L2-3 | 254791_at | AT4G12910 | serine carboxypeptidase-like 20;(source:Araport11)                                                                                                                                                                                                                                                                                                  | 47.96  | 95.25   | 0.50 | 4.57E-04 | 1.75E-03 |
| 2259 | 3 | F2-3 vs. L2-3 | 254425_at | AT4G21450 | PapD-like superfamily protein;(source:Araport11)                                                                                                                                                                                                                                                                                                    | 264.78 | 534.24  | 0.50 | 7.11E-05 | 4.61E-04 |
| 2260 | 3 | F2-3 vs. L2-3 | 253753_at | AT4G29030 | Putative membrane lipoprotein;(source:Araport11)                                                                                                                                                                                                                                                                                                    | 157.00 | 313.41  | 0.50 | 5.61E-05 | 3.95E-04 |
| 2261 | 3 | F2-3 vs. L2-3 | 253163_at | AT4G35750 | SEC14 cytosolic factor family protein / phosphoglyceride transfer family protein;(source:Araport11)<br>Encodes ALG10, an ER-resident alpha1,2-glucosyltransferase that is required for lipid-linked oligosaccharide biosynthesis and subsequently for normal leaf development and abiotic stress response.                                          | 40.98  | 81.44   | 0.50 | 1.44E-04 | 7.62E-04 |
| 2262 | 3 | F2-3 vs. L2-3 | 251048_at | AT5G02410 |                                                                                                                                                                                                                                                                                                                                                     | 26.32  | 52.61   | 0.50 | 1.10E-04 | 6.29E-04 |
| 2263 | 3 | F2-3 vs. L2-3 | 245183_at | AT5G12440 | CCCH-type zinc fingerfamily protein with RNA-binding domain-containing protein;(source:Araport11)                                                                                                                                                                                                                                                   | 92.72  | 185.36  | 0.50 | 4.07E-04 | 1.61E-03 |
| 2264 | 3 | F2-3 vs. L2-3 | 246026_at | AT5G21070 | Fe(3+) dicitrate transport system permease;(source:Araport11)                                                                                                                                                                                                                                                                                       | 43.08  | 86.33   | 0.50 | 3.48E-05 | 2.77E-04 |
| 2265 | 3 | F2-3 vs. L2-3 | 249434_at | AT5G39960 | GTP-binding protein;(source:Araport11)<br>Encodes a small ubiquitin-like modifier (SUMO) polypeptide that becomes covalently attached to various intracellular protein targets, much like ubiquitination, leading to post-translational modification of those targets. SUMO2 can form SUMO chains through lysine residue 10 during in vitro assays. | 98.30  | 198.59  | 0.50 | 7.93E-05 | 4.98E-04 |
| 2266 | 3 | F2-3 vs. L2-3 | 248103_at | AT5G55160 | splicing factor;(source:Araport11)                                                                                                                                                                                                                                                                                                                  | 366.31 | 738.66  | 0.50 | 2.34E-04 | 1.07E-03 |
| 2267 | 3 | F2-3 vs. L2-3 | 247271_at | AT5G64270 | A member of ARF-like GTPase family. A thaliana has 21 members, in two subfamilies, ARF and ARF-like (ARL) GTPases.                                                                                                                                                                                                                                  | 231.79 | 464.79  | 0.50 | 4.23E-04 | 1.66E-03 |
| 2268 | 3 | F2-3 vs. L2-3 | 264252_at | AT1G09180 | Ribosomal protein L6 family protein;(source:Araport11)                                                                                                                                                                                                                                                                                              | 112.67 | 230.81  | 0.49 | 2.77E-04 | 1.21E-03 |
| 2269 | 3 | F2-3 vs. L2-3 | 255776_at | AT1G18540 | Small nuclear ribonucleoprotein family protein;(source:Araport11)                                                                                                                                                                                                                                                                                   | 149.19 | 302.65  | 0.49 | 3.59E-04 | 1.47E-03 |
| 2270 | 3 | F2-3 vs. L2-3 | 259477_at | AT1G19120 | choice-of-anchor C domain protein, putative (Protein of unknown function, DUF642);(source:Araport11)                                                                                                                                                                                                                                                | 509.65 | 1030.17 | 0.49 | 1.61E-04 | 8.24E-04 |
| 2271 | 3 | F2-3 vs. L2-3 | 260028_at | AT1G29980 | transmembrane protein;(source:Araport11)                                                                                                                                                                                                                                                                                                            | 253.47 | 521.91  | 0.49 | 1.43E-04 | 7.55E-04 |
| 2272 | 3 | F2-3 vs. L2-3 | 262558_at | AT1G31335 | Encodes a nuclear-localized transcriptional activator with weak sequence similarity to basic helix-loop-helix(bHLH)-domain proteins. It promotes the production of stele cells in root meristems and is required to establish and maintain the normal vascular cell number and pattern in primary and lateral roots.                                | 48.40  | 99.35   | 0.49 | 7.72E-04 | 2.62E-03 |
| 2273 | 3 | F2-3 vs. L2-3 | 265629_at | AT2G27230 | helicase with zinc finger protein;(source:Araport11)                                                                                                                                                                                                                                                                                                | 113.21 | 230.39  | 0.49 | 4.47E-04 | 1.73E-03 |
| 2274 | 3 | F2-3 vs. L2-3 | 263787_at | AT2G46420 | Cyclophilin-like peptidyl-prolyl cis-trans isomerase family protein;(source:Araport11)                                                                                                                                                                                                                                                              | 92.94  | 190.71  | 0.49 | 4.01E-05 | 3.10E-04 |
| 2275 | 3 | F2-3 vs. L2-3 | 260530_at | AT2G47320 | low affinity calcium antiporter CAX2 The mRNA is cell-to-cell mobile.                                                                                                                                                                                                                                                                               | 191.55 | 388.81  | 0.49 | 8.50E-06 | 1.06E-04 |
| 2276 | 3 | F2-3 vs. L2-3 | 257662_at | AT3G13320 | xyloglucan endotransglucosylase/hydrolase 16;(source:Araport11)                                                                                                                                                                                                                                                                                     | 60.02  | 122.38  | 0.49 | 9.05E-05 | 5.49E-04 |
| 2277 | 3 | F2-3 vs. L2-3 | 257203_at | AT3G23730 | AP2/B3-like transcriptional factor family protein;(source:Araport11)                                                                                                                                                                                                                                                                                | 470.02 | 954.48  | 0.49 | 9.55E-04 | 3.10E-03 |
| 2278 | 3 | F2-3 vs. L2-3 | 252495_at | AT3G46770 | GATA zinc finger protein;(source:Araport11)                                                                                                                                                                                                                                                                                                         | 35.47  | 73.00   | 0.49 | 4.64E-04 | 1.77E-03 |
| 2279 | 3 | F2-3 vs. L2-3 | 252008_at | AT3G52610 | Pectin lyase-like superfamily protein;(source:Araport11)                                                                                                                                                                                                                                                                                            | 53.41  | 108.10  | 0.49 | 8.80E-06 | 1.09E-04 |
| 2280 | 3 | F2-3 vs. L2-3 | 251982_at | AT3G53190 | WDL5 is an target of EIN3 that co-localizes with cortical microtubules. It its thought to function to stabilize microtubules during ethylene induced hypocotyl elongation.                                                                                                                                                                          | 98.58  | 199.54  | 0.49 | 2.04E-05 | 1.92E-04 |
| 2281 | 3 | F2-3 vs. L2-3 | 253424_at | AT4G32330 |                                                                                                                                                                                                                                                                                                                                                     | 33.49  | 68.96   | 0.49 | 1.14E-04 | 6.46E-04 |

|      |   |               |            |           |                                                                                                                                                                                                                                                                                      |         |         |      |          |          |
|------|---|---------------|------------|-----------|--------------------------------------------------------------------------------------------------------------------------------------------------------------------------------------------------------------------------------------------------------------------------------------|---------|---------|------|----------|----------|
|      |   |               |            |           | Encodes PPO2, a putative protoporphyrinogen oxidase based on sequence homology. Also known as MEE61 (maternal effect embryo arrest 61). mee61 mutant shows arrested endosperm development.                                                                                           | 124.73  | 253.37  | 0.49 | 3.25E-05 | 2.64E-04 |
| 2282 | 3 | F2-3 vs. L2-3 | 250221_at  | AT5G14220 |                                                                                                                                                                                                                                                                                      | 71.88   | 146.08  | 0.49 | 9.30E-06 | 1.13E-04 |
| 2283 | 3 | F2-3 vs. L2-3 | 249456_at  | AT5G39410 | Saccharopine dehydrogenase;(source:Araport11)                                                                                                                                                                                                                                        | 155.24  | 319.08  | 0.49 | 2.41E-04 | 1.09E-03 |
| 2284 | 3 | F2-3 vs. L2-3 | 248418_at  | AT5G51660 | cleavage and polyadenylation specificity factor 160;(source:Araport11)                                                                                                                                                                                                               | 27.39   | 55.76   | 0.49 | 5.83E-04 | 2.11E-03 |
| 2285 | 3 | F2-3 vs. L2-3 | 246983_at  | AT5G67200 | Leucine-rich repeat protein kinase family protein;(source:Araport11)                                                                                                                                                                                                                 | 69.66   | 144.08  | 0.48 | 2.88E-05 | 2.43E-04 |
| 2286 | 3 | F2-3 vs. L2-3 | 264408_at  | AT1G10240 | FAR1-related sequence 11;(source:Araport11)                                                                                                                                                                                                                                          | 125.28  | 263.10  | 0.48 | 2.81E-04 | 1.23E-03 |
| 2287 | 3 | F2-3 vs. L2-3 | 259767_s_a | AT1G29370 | RNA polymerase II degradation factor-like protein (DUF1296);(source:Araport11)                                                                                                                                                                                                       |         |         |      |          |          |
| 2288 | 3 | F2-3 vs. L2-3 | 257587_at  | AT1G56310 | DEDDy-type 3&#8242; -> 5&#8242; exonuclease involved in miRNA degradation.                                                                                                                                                                                                           | 172.53  | 357.10  | 0.48 | 4.48E-05 | 3.35E-04 |
| 2289 | 3 | F2-3 vs. L2-3 | 262355_at  | AT1G72820 | Mitochondrial substrate carrier family protein;(source:Araport11)                                                                                                                                                                                                                    | 140.85  | 292.48  | 0.48 | 7.78E-04 | 2.63E-03 |
| 2290 | 3 | F2-3 vs. L2-3 | 261886_s_a | AT1G80700 | stress response NST1-like protein;(source:Araport11)                                                                                                                                                                                                                                 | 62.51   | 130.65  | 0.48 | 5.39E-05 | 3.84E-04 |
|      |   |               |            |           | TGD4 is an integral dimeric beta-barrel lipid transfer protein that binds PtdOH with its N-terminus and contains dimerization domains at its C-terminus. Mutations in this gene suppress the low temperature-induced phenotype of Arabidopsis tocopherol-deficient mutant vte2.      | 21.82   | 45.09   | 0.48 | 2.84E-04 | 1.24E-03 |
| 2291 | 3 | F2-3 vs. L2-3 | 258553_at  | AT3G06960 |                                                                                                                                                                                                                                                                                      |         |         |      |          |          |
|      |   |               |            |           | Encodes a histone 2B (H2B) protein. This protein can be ubiquitinated in planta, and this modification depends on the HUB1 and HUB2 E3 ubiquitin ligases as well as the UBC1 and UBC2 E2 ubiquitin conjugating enzymes. Lysine 146 appears to be the site of the ubiquitin addition. | 28.95   | 60.24   | 0.48 | 8.60E-06 | 1.07E-04 |
| 2292 | 3 | F2-3 vs. L2-3 | 252561_at  | AT3G45980 | Myb/SANT-like DNA-binding domain protein;(source:Araport11)                                                                                                                                                                                                                          | 40.53   | 84.05   | 0.48 | 6.71E-05 | 4.44E-04 |
| 2293 | 3 | F2-3 vs. L2-3 | 255509_at  | AT4G02210 | Homeodomain-like superfamily protein;(source:Araport11)                                                                                                                                                                                                                              | 50.17   | 105.05  | 0.48 | 1.16E-04 | 6.55E-04 |
| 2294 | 3 | F2-3 vs. L2-3 | 254682_at  | AT4G13640 |                                                                                                                                                                                                                                                                                      |         |         |      |          |          |
| 2295 | 3 | F2-3 vs. L2-3 | 253688_at  | AT4G29590 | S-adenosyl-L-methionine-dependent methyltransferases superfamily protein;(source:Araport11)                                                                                                                                                                                          | 36.26   | 76.25   | 0.48 | 1.12E-05 | 1.27E-04 |
| 2296 | 3 | F2-3 vs. L2-3 | 266535_s_a | AT5G15220 | Ribosomal protein L27 family protein;(source:Araport11)                                                                                                                                                                                                                              | 661.72  | 1372.19 | 0.48 | 5.63E-05 | 3.95E-04 |
| 2297 | 3 | F2-3 vs. L2-3 | 247725_at  | AT5G59410 | Rab5-interacting family protein;(source:Araport11)                                                                                                                                                                                                                                   | 85.85   | 178.78  | 0.48 | 4.18E-04 | 1.64E-03 |
|      |   |               | 244987_s_a |           | encodes a chloroplast ribosomal protein L2, a constituent of the large subunit of the ribosomal complex                                                                                                                                                                              | 1969.34 | 4089.75 | 0.48 | 1.46E-04 | 7.65E-04 |
| 2298 | 3 | F2-3 vs. L2-3 | t          | ATCG00830 |                                                                                                                                                                                                                                                                                      | 44.45   | 95.50   | 0.47 | 2.23E-05 | 2.04E-04 |
| 2299 | 3 | F2-3 vs. L2-3 | 262594_at  | AT1G15250 | Zinc-binding ribosomal protein family protein;(source:Araport11)                                                                                                                                                                                                                     | 277.31  | 589.91  | 0.47 | 9.80E-06 | 1.17E-04 |
| 2300 | 3 | F2-3 vs. L2-3 | 255767_at  | AT1G16740 | Ribosomal protein L20;(source:Araport11)                                                                                                                                                                                                                                             | 19.59   | 41.27   | 0.47 | 1.20E-05 | 1.34E-04 |
| 2301 | 3 | F2-3 vs. L2-3 | 261603_at  | AT1G49600 | RNA-binding protein 47A;(source:Araport11)                                                                                                                                                                                                                                           | 48.33   | 102.49  | 0.47 | 4.63E-05 | 3.43E-04 |
| 2302 | 3 | F2-3 vs. L2-3 | 262941_at  | AT1G79490 | Pentatricopeptide repeat (PPR) superfamily protein;(source:Araport11)                                                                                                                                                                                                                |         |         |      |          |          |
|      |   |               |            |           | Binds microtubules. Induces a crisscross mesh of microtubules, not bundles. Not involved in microtubule polymerization nor nucleation. Localizes to mitochondria. The mRNA is cell-to-cell mobile.                                                                                   | 89.56   | 188.58  | 0.47 | 2.70E-04 | 1.19E-03 |
| 2303 | 3 | F2-3 vs. L2-3 | 263591_at  | AT2G01910 |                                                                                                                                                                                                                                                                                      |         |         |      |          |          |
|      |   |               |            |           | Encodes a ACT domain-containing protein. The ACT domain, named after bacterial aspartate kinase, chorismate mutase and TyrA (prephenate dehydrogenase), is a regulatory domain that serves as an amino acid-binding site in feedback-regulated amino acid metabolic enzymes.         | 50.77   | 107.90  | 0.47 | 1.35E-05 | 1.48E-04 |
| 2304 | 3 | F2-3 vs. L2-3 | 266984_at  | AT2G39570 | Encodes a uracil-DNA glycosylase (UDG) involved in a base excision DNA repair pathway in mitochondria.                                                                                                                                                                               | 33.05   | 70.81   | 0.47 | 2.01E-04 | 9.61E-04 |
| 2305 | 3 | F2-3 vs. L2-3 | 256798_at  | AT3G18630 |                                                                                                                                                                                                                                                                                      | 89.40   | 189.11  | 0.47 | 2.21E-04 | 1.03E-03 |
| 2306 | 3 | F2-3 vs. L2-3 | 257615_at  | AT3G26510 | Octicosapeptide/Phox/Bem1p family protein;(source:Araport11)                                                                                                                                                                                                                         |         |         |      |          |          |
| 2307 | 3 | F2-3 vs. L2-3 | 255569_at  | AT4G01320 | CAAX protease with broad substrate specificity. Localized exclusively to the endoplasmic reticulum. UAP56-interacting factor1, binds single stranded RNA and, along with UIEF2,,appears to play a role in nuclear export of RNA.                                                     | 254.66  | 547.48  | 0.47 | 9.20E-05 | 5.56E-04 |
| 2308 | 3 | F2-3 vs. L2-3 | 254957_at  | AT4G10970 |                                                                                                                                                                                                                                                                                      | 40.87   | 87.54   | 0.47 | 1.75E-05 | 1.76E-04 |
| 2309 | 3 | F2-3 vs. L2-3 | 252789_s_a | AT1G21930 | transmembrane protein;(source:Araport11)                                                                                                                                                                                                                                             | 153.86  | 332.95  | 0.46 | 2.81E-05 | 2.39E-04 |
|      |   |               |            |           | Encodes one of two ubiquitin-conjugating enzymes belonging to the E2-C gene family (the other being UBC19). Transcript is always found in dividing cells, but also in other non-dividing cells.                                                                                      | 168.61  | 366.57  | 0.46 | 3.93E-04 | 1.57E-03 |
| 2310 | 3 | F2-3 vs. L2-3 | 261859_at  | AT1G50490 | AT hook motif DNA-binding family protein;(source:Araport11)                                                                                                                                                                                                                          | 156.39  | 337.66  | 0.46 | 1.38E-05 | 1.50E-04 |
| 2311 | 3 | F2-3 vs. L2-3 | 261549_at  | AT1G63470 | PRL1-interacting factor;(source:Araport11)                                                                                                                                                                                                                                           | 333.06  | 716.72  | 0.46 | 1.83E-04 | 8.93E-04 |
| 2312 | 3 | F2-3 vs. L2-3 | 264111_at  | AT2G13690 | Leucine-rich repeat protein kinase family protein;(source:Araport11)                                                                                                                                                                                                                 | 39.06   | 84.39   | 0.46 | 5.52E-04 | 2.02E-03 |
| 2313 | 3 | F2-3 vs. L2-3 | 266303_at  | AT2G27060 | ecotropic viral integration site protein;(source:Araport11)                                                                                                                                                                                                                          | 107.83  | 232.68  | 0.46 | 8.57E-05 | 5.28E-04 |
| 2314 | 3 | F2-3 vs. L2-3 | 267383_at  | AT2G44360 | Protein kinase superfamily protein;(source:Araport11)                                                                                                                                                                                                                                | 174.62  | 378.35  | 0.46 | 1.33E-04 | 7.19E-04 |
| 2315 | 3 | F2-3 vs. L2-3 | 267561_at  | AT2G45590 | member of WRKY Transcription Factor; Group II-d                                                                                                                                                                                                                                      | 83.53   | 180.27  | 0.46 | 5.39E-05 | 3.84E-04 |
| 2316 | 3 | F2-3 vs. L2-3 | 258803_at  | AT3G04670 | Protein of unknown function. Locus is correlated with bacterial hypersensitive response, expression is reduced after injection with avrRpm1.                                                                                                                                         | 191.33  | 411.74  | 0.46 | 3.96E-05 | 3.07E-04 |
| 2317 | 3 | F2-3 vs. L2-3 | 256607_at  | AT3G32930 |                                                                                                                                                                                                                                                                                      |         |         |      |          |          |

|      |   |               |            |           |                                                                                                                                                                                                                                                                                                                                                                                                                                                                                                                                                                               |        |         |      |          |          |
|------|---|---------------|------------|-----------|-------------------------------------------------------------------------------------------------------------------------------------------------------------------------------------------------------------------------------------------------------------------------------------------------------------------------------------------------------------------------------------------------------------------------------------------------------------------------------------------------------------------------------------------------------------------------------|--------|---------|------|----------|----------|
| 2318 | 3 | F2-3 vs. L2-3 | 248726_at  | AT5G47960 | Encodes a small molecular weight g-protein.                                                                                                                                                                                                                                                                                                                                                                                                                                                                                                                                   | 14.76  | 32.06   | 0.46 | 7.17E-05 | 4.63E-04 |
| 2319 | 3 | F2-3 vs. L2-3 | 247986_at  | AT5G56880 | hypothetical protein;(source:Araport11)                                                                                                                                                                                                                                                                                                                                                                                                                                                                                                                                       | 106.34 | 228.85  | 0.46 | 2.13E-04 | 1.00E-03 |
| 2320 | 3 | F2-3 vs. L2-3 | 247525_at  | AT5G61380 | Pseudo response regulator involved in the generation of circadian rhythms. TOC1 appears to shorten the period of circumnutation speed. TOC1 contributes to the plant fitness (carbon fixation, biomass) by influencing the circadian clock period. PRR3 may increase the stability of TOC1 by preventing interactions between TOC1 and the F-box protein ZTL. Expression of TOC1 is correlated with rhythmic changes in chromatin organization. The mRNA is cell-to-cell mobile.                                                                                              | 66.67  | 145.86  | 0.46 | 2.12E-04 | 9.99E-04 |
| 2321 | 3 | F2-3 vs. L2-3 | 244981_at  | ATCG00770 | chloroplast 30S ribosomal protein S8                                                                                                                                                                                                                                                                                                                                                                                                                                                                                                                                          | 415.32 | 900.15  | 0.46 | 3.20E-05 | 2.61E-04 |
| 2322 | 3 | F2-3 vs. L2-3 | 244982_at  | ATCG00790 | chloroplast gene encoding a ribosomal protein L16, which is a constituent of 50S large ribosomal subunit                                                                                                                                                                                                                                                                                                                                                                                                                                                                      | 472.33 | 1019.63 | 0.46 | 5.90E-06 | 8.35E-05 |
| 2323 | 3 | F2-3 vs. L2-3 | 263116_s_a | AT1G03140 | PRP18a is one of two paralogs (the other being PRP18b) which are highly similar to the step II splicing factors in yeast. Loss of function mutations show defects in alternative splicing, mostly intron retention events.                                                                                                                                                                                                                                                                                                                                                    | 177.63 | 390.41  | 0.45 | 2.96E-04 | 1.28E-03 |
| 2324 | 3 | F2-3 vs. L2-3 | 266110_at  | AT2G02080 | C2H2 BIRD transcription factor family.                                                                                                                                                                                                                                                                                                                                                                                                                                                                                                                                        | 36.94  | 82.93   | 0.45 | 6.08E-04 | 2.18E-03 |
| 2325 | 3 | F2-3 vs. L2-3 | 266001_at  | AT2G24150 | heptahelical transmembrane protein HHP3                                                                                                                                                                                                                                                                                                                                                                                                                                                                                                                                       | 43.92  | 97.13   | 0.45 | 3.50E-05 | 2.78E-04 |
| 2326 | 3 | F2-3 vs. L2-3 | 267586_at  | AT2G41950 | DNA-directed RNA polymerase subunit beta;(source:Araport11)                                                                                                                                                                                                                                                                                                                                                                                                                                                                                                                   | 20.08  | 45.12   | 0.45 | 6.10E-06 | 8.52E-05 |
| 2327 | 3 | F2-3 vs. L2-3 | 259235_at  | AT3G11600 | One of two plant specific paralogs of unknown function. Interacts with GL2. GIR1/GIR2 loss of function resembles gl2 lof mutations.                                                                                                                                                                                                                                                                                                                                                                                                                                           | 20.99  | 46.44   | 0.45 | 8.42E-04 | 2.81E-03 |
| 2328 | 3 | F2-3 vs. L2-3 | 251995_at  | AT3G52940 | Encodes a sterol C-14 reductase required for cell division and expansion and is involved in proper organization of the embryo.                                                                                                                                                                                                                                                                                                                                                                                                                                                | 90.41  | 201.66  | 0.45 | 1.90E-06 | 3.89E-05 |
| 2329 | 3 | F2-3 vs. L2-3 | 246317_at  | AT3G56900 | Encodes ALADIN, a component of the nuclear pore complex.                                                                                                                                                                                                                                                                                                                                                                                                                                                                                                                      | 45.84  | 102.36  | 0.45 | 8.61E-05 | 5.29E-04 |
| 2330 | 3 | F2-3 vs. L2-3 | 245367_at  | AT4G16265 | One of two highly similar, non-catalytic subunits common to nuclear DNA-directed RNA polymerases II, IV and V; homologous to budding yeast RPB9. Appears to be redundant with At3g16980                                                                                                                                                                                                                                                                                                                                                                                       | 105.45 | 233.65  | 0.45 | 1.37E-05 | 1.50E-04 |
| 2331 | 3 | F2-3 vs. L2-3 | 254041_at  | AT4G25830 | Uncharacterized protein family (UPF0497);(source:Araport11)                                                                                                                                                                                                                                                                                                                                                                                                                                                                                                                   | 49.40  | 109.14  | 0.45 | 4.49E-04 | 1.73E-03 |
| 2332 | 3 | F2-3 vs. L2-3 | 253981_at  | AT4G26670 | Mitochondrial import inner membrane translocase subunit Tim17/Tim22/Tim23 family protein;(source:Araport11)                                                                                                                                                                                                                                                                                                                                                                                                                                                                   | 45.62  | 101.25  | 0.45 | 9.00E-07 | 2.22E-05 |
| 2333 | 3 | F2-3 vs. L2-3 | 253148_at  | AT4G35620 | Cyclin B2;(source:Araport11)                                                                                                                                                                                                                                                                                                                                                                                                                                                                                                                                                  | 22.95  | 50.58   | 0.45 | 1.81E-04 | 8.86E-04 |
| 2334 | 3 | F2-3 vs. L2-3 | 250814_at  | AT5G05080 | ubiquitin-conjugating enzyme 22;(source:Araport11)                                                                                                                                                                                                                                                                                                                                                                                                                                                                                                                            | 248.17 | 552.91  | 0.45 | 2.02E-04 | 9.64E-04 |
| 2335 | 3 | F2-3 vs. L2-3 | 249238_at  | AT5G41970 | Metal-dependent protein hydrolase;(source:Araport11)                                                                                                                                                                                                                                                                                                                                                                                                                                                                                                                          | 150.85 | 337.20  | 0.45 | 2.00E-06 | 3.93E-05 |
| 2336 | 3 | F2-3 vs. L2-3 | 247238_at  | AT5G64610 | Encodes an enzyme with histone acetyltransferase activity. HAM1 primarily acetylate histone H4, but also display some ability to acetylate H3. Prior acetylation of lysine 5 on histone H4 reduces radioactive acetylation by either HAM1. HAM1 acetylates histone H4 lysine 5.                                                                                                                                                                                                                                                                                               | 81.04  | 178.57  | 0.45 | 2.12E-05 | 1.96E-04 |
| 2337 | 3 | F2-3 vs. L2-3 | 259528_at  | AT1G12330 | cyclin-dependent kinase-like protein;(source:Araport11)                                                                                                                                                                                                                                                                                                                                                                                                                                                                                                                       | 97.10  | 218.37  | 0.44 | 2.49E-04 | 1.12E-03 |
| 2338 | 3 | F2-3 vs. L2-3 | 256112_at  | AT1G16920 | small GTP-binding protein (Rab11)similar to YPT3/RAB11 proteins in yeast and mammals, respectively. YPT3/RAB11 is involved in intracellular protein trafficking.                                                                                                                                                                                                                                                                                                                                                                                                              | 508.96 | 1157.70 | 0.44 | 2.80E-04 | 1.23E-03 |
| 2339 | 3 | F2-3 vs. L2-3 | 245821_at  | AT1G26270 | Phosphatidylinositol 3- and 4-kinase family protein;(source:Araport11)                                                                                                                                                                                                                                                                                                                                                                                                                                                                                                        | 103.47 | 237.35  | 0.44 | 2.86E-05 | 2.42E-04 |
| 2340 | 3 | F2-3 vs. L2-3 | 259942_at  | AT1G71260 | Encodes WHY2, a homolog of the potato p24 protein. It shares the conserved KGKAAL domain, a putative DNA-binding domain, with potato p24 and is localized to mitochondria and not the nucleus. WHY2 is a member of the Whirly family proteins present mainly in the plant kingdom performing various activities related to DNA metabolism. Crystal structure of Solanum tuberosum WHY2, a close homolog of Arabidopsis WHY2, reveal that Whirly proteins bind to single strand DNA to promote accurate repair of DNA double-strand breaks over an error-prone repair pathway. | 28.65  | 64.41   | 0.44 | 2.63E-04 | 1.17E-03 |
| 2341 | 3 | F2-3 vs. L2-3 | 256341_at  | AT1G72040 | Encodes a multisubstrate deoxyribonucleoside kinase that salvages DNA precursors.                                                                                                                                                                                                                                                                                                                                                                                                                                                                                             | 41.12  | 93.55   | 0.44 | 1.97E-05 | 1.89E-04 |
| 2342 | 3 | F2-3 vs. L2-3 | 259912_at  | AT1G72670 | Member of IQ67 (CaM binding) domain containing family.                                                                                                                                                                                                                                                                                                                                                                                                                                                                                                                        | 42.88  | 97.45   | 0.44 | 1.34E-04 | 7.21E-04 |
| 2343 | 3 | F2-3 vs. L2-3 | 259103_at  | AT3G11690 | hypothetical protein;(source:Araport11)                                                                                                                                                                                                                                                                                                                                                                                                                                                                                                                                       | 68.98  | 158.10  | 0.44 | 1.59E-04 | 8.15E-04 |
| 2344 | 3 | F2-3 vs. L2-3 | 256320_at  | AT3G12170 | Chaperone DnaJ-domain superfamily protein;(source:Araport11)                                                                                                                                                                                                                                                                                                                                                                                                                                                                                                                  | 46.73  | 105.47  | 0.44 | 1.82E-05 | 1.81E-04 |
| 2345 | 3 | F2-3 vs. L2-3 | 256595_x_a | AT3G28530 | UDP-glucose 4-epimerase;(source:Araport11)                                                                                                                                                                                                                                                                                                                                                                                                                                                                                                                                    | 237.21 | 536.54  | 0.44 | 4.67E-05 | 3.45E-04 |
| 2346 | 3 | F2-3 vs. L2-3 | 252508_at  | AT3G46210 | Ribosomal protein S5 domain 2-like superfamily protein;(source:Araport11)                                                                                                                                                                                                                                                                                                                                                                                                                                                                                                     | 41.29  | 94.61   | 0.44 | 2.00E-06 | 3.93E-05 |
| 2347 | 3 | F2-3 vs. L2-3 | 255021_at  | AT4G10330 | glycine-rich protein;(source:Araport11)                                                                                                                                                                                                                                                                                                                                                                                                                                                                                                                                       | 74.91  | 170.95  | 0.44 | 1.23E-04 | 6.80E-04 |

|      |   |               |            |           |                                                                                                                                                                                                                                                                                                                                                                                                                                                                                                                                                                                                                                                                                                                               |         |         |      |          |          |
|------|---|---------------|------------|-----------|-------------------------------------------------------------------------------------------------------------------------------------------------------------------------------------------------------------------------------------------------------------------------------------------------------------------------------------------------------------------------------------------------------------------------------------------------------------------------------------------------------------------------------------------------------------------------------------------------------------------------------------------------------------------------------------------------------------------------------|---------|---------|------|----------|----------|
|      |   |               |            |           | Encodes a peroxisomal protein of the ATP binding cassette (ABC) transporter class (PMP subfamily) with significant identity to the human X-linked adrenoleukodystrophy protein (ALDP). The gene product promotes germination and represses embryo dormancy. ABI3, ABA1, FUS3 and LEC1 are epistatic to this gene. Mutants accumulate fatty acyl CoA suggesting a defect in uptake of fatty acyl CoA into the peroxisome.                                                                                                                                                                                                                                                                                                      | 147.95  | 338.12  | 0.44 | 2.30E-04 | 1.06E-03 |
| 2348 | 3 | F2-3 vs. L2-3 | 252830_at  | AT4G39850 |                                                                                                                                                                                                                                                                                                                                                                                                                                                                                                                                                                                                                                                                                                                               |         |         |      |          |          |
| 2349 | 3 | F2-3 vs. L2-3 | 252824_at  | AT4G40030 | Histone superfamily protein;(source:Araport11)                                                                                                                                                                                                                                                                                                                                                                                                                                                                                                                                                                                                                                                                                | 1050.94 | 2401.53 | 0.44 | 3.40E-06 | 5.58E-05 |
| 2350 | 3 | F2-3 vs. L2-3 | 248403_at  | AT5G51410 | LUC7 N terminus domain-containing protein;(source:Araport11)                                                                                                                                                                                                                                                                                                                                                                                                                                                                                                                                                                                                                                                                  | 73.67   | 166.70  | 0.44 | 3.13E-04 | 1.33E-03 |
| 2351 | 3 | F2-3 vs. L2-3 | 248385_at  | AT5G51910 | TCP family transcription factor;(source:Araport11)                                                                                                                                                                                                                                                                                                                                                                                                                                                                                                                                                                                                                                                                            | 26.19   | 59.49   | 0.44 | 5.98E-04 | 2.15E-03 |
| 2352 | 3 | F2-3 vs. L2-3 | 247284_at  | AT5G64410 | oligopeptide transporter                                                                                                                                                                                                                                                                                                                                                                                                                                                                                                                                                                                                                                                                                                      | 39.56   | 89.70   | 0.44 | 9.28E-04 | 3.03E-03 |
| 2353 | 3 | F2-3 vs. L2-3 | 244966_at  | ATCG00590 | electron carrier;(source:Araport11)                                                                                                                                                                                                                                                                                                                                                                                                                                                                                                                                                                                                                                                                                           | 22.21   | 50.80   | 0.44 | 8.52E-05 | 5.26E-04 |
| 2354 | 3 | F2-3 vs. L2-3 | 260369_at  | AT1G69620 | putative 60S ribosomal protein L34 The mRNA is cell-to-cell mobile.                                                                                                                                                                                                                                                                                                                                                                                                                                                                                                                                                                                                                                                           | 441.98  | 1033.10 | 0.43 | 2.35E-05 | 2.11E-04 |
| 2355 | 3 | F2-3 vs. L2-3 | 263064_at  | AT2G18160 | Encodes a b-ZIP transcription factor.                                                                                                                                                                                                                                                                                                                                                                                                                                                                                                                                                                                                                                                                                         | 51.09   | 118.29  | 0.43 | 9.39E-05 | 5.62E-04 |
|      |   |               |            |           | Encodes a 22&#945; hydroxylase whose reaction is a rate-limiting step in brassinosteroid biosynthetic pathway. The protein is a member of CYP90B gene family. CLM is an epi-allele with small, compressed rosette, reduced internode length, and reduced fertility, appears in selfed ddm mutant plants possibly due to loss of cytosine methylation. Transcripts accumulate in actively growing tissues, and GUS expression is negatively regulated by brassinosteroids. Localized in the endoplasmic reticulum. The in vitro expressed protein can perform the C-22 hydroxylation of a variety of C27-, C28- and C29-sterols. Cholesterol was the best substrate, followed by campesterol. Sitosterol was a poor substrate. | 239.54  | 560.60  | 0.43 | 3.50E-06 | 5.69E-05 |
| 2356 | 3 | F2-3 vs. L2-3 | 252184_at  | AT3G50660 |                                                                                                                                                                                                                                                                                                                                                                                                                                                                                                                                                                                                                                                                                                                               |         |         |      |          |          |
| 2357 | 3 | F2-3 vs. L2-3 | 252128_at  | AT3G50870 | Encodes a GATA transcriptional regulator required to position the proembryo boundary in the early embryo. Regulates shoot apical meristem and flower development.                                                                                                                                                                                                                                                                                                                                                                                                                                                                                                                                                             | 48.24   | 111.75  | 0.43 | 1.81E-04 | 8.86E-04 |
| 2358 | 3 | F2-3 vs. L2-3 | 254784_at  | AT4G12720 | Encodes a protein with ADP-ribose hydrolase activity. Negatively regulates EDS1-conditioned plant defense and programmed cell death.                                                                                                                                                                                                                                                                                                                                                                                                                                                                                                                                                                                          | 204.75  | 472.25  | 0.43 | 9.60E-06 | 1.15E-04 |
| 2359 | 3 | F2-3 vs. L2-3 | 254391_at  | AT4G21590 | Encodes a putative endonuclease but no demonstrable endonuclease activity, either towards single stranded DNA or mismatches, has been seen in vitro. Activated by AGAMOUS in a cal-1, ap1-1 background. Expressed in the floral meristem and during stamen development.                                                                                                                                                                                                                                                                                                                                                                                                                                                       | 195.59  | 457.42  | 0.43 | 2.30E-05 | 2.08E-04 |
| 2360 | 3 | F2-3 vs. L2-3 | 248438_at  | AT5G51230 | Polycomb group protein with zinc finger domain involved in negative regulation of reproductive development. Forms a complex with FIE, CLF, and MSI1. This complex modulates the expression of target genes including AG, PI and AP3.                                                                                                                                                                                                                                                                                                                                                                                                                                                                                          | 214.53  | 499.25  | 0.43 | 3.47E-04 | 1.43E-03 |
| 2361 | 3 | F2-3 vs. L2-3 | 247702_at  | AT5G59500 | protein C-terminal S-isoprenylcysteine carboxyl O-methyltransferase;(source:Araport11)                                                                                                                                                                                                                                                                                                                                                                                                                                                                                                                                                                                                                                        | 222.02  | 512.58  | 0.43 | 4.56E-05 | 3.40E-04 |
| 2362 | 3 | F2-3 vs. L2-3 | 247112_at  | AT5G65950 | TRAPPIII complex protein which regulates TGN integrity, by altered TGN/EE association of several residents, including SYNTAXIN OF PLANTS 61 (SYP61), and altered vesicle morphology. Involved in regulation of endosomal function and salt stress response.                                                                                                                                                                                                                                                                                                                                                                                                                                                                   | 212.60  | 493.63  | 0.43 | 7.17E-05 | 4.63E-04 |
| 2363 | 3 | F2-3 vs. L2-3 | 244991_s_a | ATCG01250 | NADH dehydrogenase ND2                                                                                                                                                                                                                                                                                                                                                                                                                                                                                                                                                                                                                                                                                                        | 20.54   | 47.51   | 0.43 | 4.56E-04 | 1.75E-03 |
| 2364 | 3 | F2-3 vs. L2-3 | 255889_at  | AT1G17840 | Encodes a plasma membrane-localized ATP-binding cassette transporter, that is required for cutin transport to the extracellular matrix. The mRNA is cell-to-cell mobile.                                                                                                                                                                                                                                                                                                                                                                                                                                                                                                                                                      | 436.29  | 1035.50 | 0.42 | 8.06E-05 | 5.04E-04 |
| 2365 | 3 | F2-3 vs. L2-3 | 262400_at  | AT1G49480 | Encodes a nuclear-localized DNA-binding protein that interacts with ITN1 at the PM and nuclei in vivo and may regulate ITN Primes subcellular localization.                                                                                                                                                                                                                                                                                                                                                                                                                                                                                                                                                                   | 171.61  | 409.94  | 0.42 | 6.45E-04 | 2.28E-03 |
| 2366 | 3 | F2-3 vs. L2-3 | 262203_at  | AT2G01060 | myb-like HTH transcriptional regulator family protein;(source:Araport11)                                                                                                                                                                                                                                                                                                                                                                                                                                                                                                                                                                                                                                                      | 38.42   | 92.35   | 0.42 | 1.84E-04 | 8.94E-04 |
| 2367 | 3 | F2-3 vs. L2-3 | 257985_at  | AT3G20810 | JMJD5 encodes a protein which contains a jumonji-C (jmc) domain. jmj5 mutant plants have a short-period circadian phenotype. JMJD5 has histone demethylase activity and interacts with EFM to repress FT.                                                                                                                                                                                                                                                                                                                                                                                                                                                                                                                     | 27.42   | 64.62   | 0.42 | 4.69E-04 | 1.78E-03 |
| 2368 | 3 | F2-3 vs. L2-3 | 256761_at  | AT3G25670 | Leucine-rich repeat (LRR) family protein;(source:Araport11)                                                                                                                                                                                                                                                                                                                                                                                                                                                                                                                                                                                                                                                                   | 9.59    | 22.62   | 0.42 | 3.76E-04 | 1.52E-03 |
| 2369 | 3 | F2-3 vs. L2-3 | 251319_at  | AT3G61610 | Galactose mutarotase-like superfamily protein;(source:Araport11)                                                                                                                                                                                                                                                                                                                                                                                                                                                                                                                                                                                                                                                              | 49.39   | 116.57  | 0.42 | 3.70E-06 | 5.84E-05 |
| 2370 | 3 | F2-3 vs. L2-3 | 254986_at  | AT4G10640 | Overexpression of IQD16 in transgenic Arabidopsis Pro35:IQD16 lines alters microtubule organization, cell shape, and plant growth. Phenotypes are reminiscent of lng1-1D plants, which overexpress LNG1/TRM2. IQD16 induces elongation of aerial tissues.                                                                                                                                                                                                                                                                                                                                                                                                                                                                     | 24.95   | 59.14   | 0.42 | 3.90E-06 | 6.01E-05 |

|      |   |               |           |           |                                                                                                                                                                                                                                                                                                                                                                                                                                                                                                                                                                                                                                                                                             |         |         |      |          |          |
|------|---|---------------|-----------|-----------|---------------------------------------------------------------------------------------------------------------------------------------------------------------------------------------------------------------------------------------------------------------------------------------------------------------------------------------------------------------------------------------------------------------------------------------------------------------------------------------------------------------------------------------------------------------------------------------------------------------------------------------------------------------------------------------------|---------|---------|------|----------|----------|
| 2371 | 3 | F2-3 vs. L2-3 | 250269_at | AT5G12970 | Calcium-dependent lipid-binding (CaLB domain) plant phosphoribosyltransferase family protein;(source:Araport11)                                                                                                                                                                                                                                                                                                                                                                                                                                                                                                                                                                             | 45.50   | 107.84  | 0.42 | 4.48E-05 | 3.35E-04 |
| 2372 | 3 | F2-3 vs. L2-3 | 249922_at | AT5G19140 | aluminum induced protein with YGL and LRDR motifs;(source:Araport11)                                                                                                                                                                                                                                                                                                                                                                                                                                                                                                                                                                                                                        | 1815.65 | 4363.45 | 0.42 | 2.42E-05 | 2.16E-04 |
| 2373 | 3 | F2-3 vs. L2-3 | 263727_at | AT2G13540 | Encodes a nuclear cap-binding protein that forms a heterodimeric complex with CBP20 and is involved in ABA signaling and flowering. Mutants are early flowering and exhibit hypersensitive response to ABA in germination inhibition.Loss of ABH1 function results in abnormal processing of mRNAs for several important floral regulators (FLC, CO, FLM). Analysis of loss of function mutations suggests a role in pri-miRNA processing and mRNA splicing. Note that two different mutant alleles were given the same name abh1-7 (Kuhn et al 2007; Kim et al 2008). To avoid confusion, abh1-7 described in Kim et al (2008) has been renamed abh1-107 (other names: ensalada-1, ens-1). | 82.44   | 201.84  | 0.41 | 1.58E-05 | 1.64E-04 |
| 2374 | 3 | F2-3 vs. L2-3 | 266758_at | AT2G46920 | Pol mutations are recessive, partial suppressors of meristem defects in strong clv1 and clv3 mutants, and nearly complete suppressors of weak clv1 mutants. Single mutants appear normal. Acts downstream of the CLV signaling pathway in meristem development and is required together with PLL1 for stem-cell maintenance through the regulation of WUS.                                                                                                                                                                                                                                                                                                                                  | 86.16   | 209.64  | 0.41 | 4.74E-04 | 1.80E-03 |
| 2375 | 3 | F2-3 vs. L2-3 | 259154_at | AT3G10260 | Reticulon family protein;(source:Araport11)                                                                                                                                                                                                                                                                                                                                                                                                                                                                                                                                                                                                                                                 | 223.24  | 549.06  | 0.41 | 1.27E-04 | 6.98E-04 |
| 2376 | 3 | F2-3 vs. L2-3 | 252267_at | AT3G49640 | Aldolase-type TIM barrel family protein;(source:Araport11)                                                                                                                                                                                                                                                                                                                                                                                                                                                                                                                                                                                                                                  | 70.17   | 170.85  | 0.41 | 2.14E-04 | 1.00E-03 |
| 2377 | 3 | F2-3 vs. L2-3 | 254990_at | AT4G10610 | RNA-binding protein, putative. Member of a family of proteins having an PABC binding domain (PAM motif).                                                                                                                                                                                                                                                                                                                                                                                                                                                                                                                                                                                    | 167.71  | 408.06  | 0.41 | 5.78E-05 | 4.02E-04 |
| 2378 | 3 | F2-3 vs. L2-3 | 253871_at | AT4G27440 | light-dependent NADPH:protochlorophyllide oxidoreductase B The mRNA is cell-to-cell mobile.                                                                                                                                                                                                                                                                                                                                                                                                                                                                                                                                                                                                 | 811.40  | 1968.09 | 0.41 | 8.11E-04 | 2.73E-03 |
| 2379 | 3 | F2-3 vs. L2-3 | 253403_at | AT4G32830 | Encodes a member of a family of Ser/Thr kinases whose activities peak during cell division. Transcripts are abundant in tissues rich in dividing cells like roots and flowers but are low or absent in fully expanded leaves and stems. In interphase cells, the protein is predominantly nuclear. During mitosis, the protein associates with plant-specific cytoskeletal structures (preprophase band, phragmoplast, nascent cell plate) that are necessary for cytokinesis as well as with the microtubule spindle. It specifically phosphorylates Ser10 of histone H3 and colocalizes with phosphorylated histone H3 during mitosis.                                                    | 183.89  | 453.01  | 0.41 | 3.91E-05 | 3.04E-04 |
| 2380 | 3 | F2-3 vs. L2-3 | 250141_at | AT5G14640 | shaggy-like kinase 13;(source:Araport11)                                                                                                                                                                                                                                                                                                                                                                                                                                                                                                                                                                                                                                                    | 278.79  | 686.11  | 0.41 | 3.90E-06 | 6.01E-05 |
| 2381 | 3 | F2-3 vs. L2-3 | 248277_at | AT5G52860 | ABC-2 type transporter family protein;(source:Araport11)                                                                                                                                                                                                                                                                                                                                                                                                                                                                                                                                                                                                                                    | 40.45   | 99.13   | 0.41 | 5.74E-04 | 2.08E-03 |
| 2382 | 3 | F2-3 vs. L2-3 | 264582_at | AT1G05230 | Encodes a homeobox-leucine zipper family protein belonging to the HD-ZIP IV family. Mutants have trichomes that appear glass-like under a dissecting microscope as compared to the wild-type trichomes. The mutations do not affect trichome growth or branch number.                                                                                                                                                                                                                                                                                                                                                                                                                       | 80.68   | 201.42  | 0.40 | 6.53E-05 | 4.35E-04 |
| 2383 | 3 | F2-3 vs. L2-3 | 261486_at | AT1G14510 | Encodes a member of the Alfin1-like family of nuclear-localized PHD (plant homeodomain) domain containing proteins. All AL proteins except AL3 bind to di- or trimethylated histone H3 (H3K4me3/2). Members of this family include: AT5G05610 (AL1), AT3G11200 (AL2), AT3G42790 (AL3), AT5G26210 (AL4), AT5G20510 (AL5), AT2G02470 (AL6), AT1G14510 (AL7). Involved in light-dependent cold tolerance and encodes an enolase. Protein is tyrosine-phosphorylated and its phosphorylation state is modulated in response to ABA in Arabidopsis thaliana seeds.                                                                                                                               | 195.43  | 485.75  | 0.40 | 2.00E-06 | 3.93E-05 |
| 2384 | 3 | F2-3 vs. L2-3 | 263924_at | AT2G36530 |                                                                                                                                                                                                                                                                                                                                                                                                                                                                                                                                                                                                                                                                                             | 327.20  | 814.48  | 0.40 | 3.37E-04 | 1.41E-03 |
| 2385 | 3 | F2-3 vs. L2-3 | 257858_at | AT3G12920 | Encodes one of the BRGs (BOI-related gene) involved in resistance to Botrytis cinerea.                                                                                                                                                                                                                                                                                                                                                                                                                                                                                                                                                                                                      | 177.03  | 440.44  | 0.40 | 2.60E-04 | 1.16E-03 |
| 2386 | 3 | F2-3 vs. L2-3 | 254596_at | AT4G18975 | Pentatricopeptide repeat (PPR) superfamily protein;(source:Araport11)                                                                                                                                                                                                                                                                                                                                                                                                                                                                                                                                                                                                                       | 25.57   | 64.45   | 0.40 | 2.45E-04 | 1.11E-03 |
| 2387 | 3 | F2-3 vs. L2-3 | 253811_at | AT4G28190 | Encodes a novel Cys-rich protein with a B-box like domain that acts as a negative regulator of meristem cell accumulation in inflorescence and floral meristems as loss-of-function ult1 mutations cause inflorescence meristem enlargement, the production of extra flowers and floral organs, and a decrease in floral meristem determinacy. Acts opposite to CLF which represses AG, but preventing deposition of CLF repressive methylation marks.ULT1 acts as an anti-repressor that counteracts EMF1 action through modulation of histone marks on target genes. Regulates developmental as well as biotic and abiotic stress response genes.                                         | 29.54   | 74.35   | 0.40 | 4.57E-05 | 3.40E-04 |
| 2388 | 3 | F2-3 vs. L2-3 | 250768_at | AT5G05670 | signal recognition particle binding protein;(source:Araport11)                                                                                                                                                                                                                                                                                                                                                                                                                                                                                                                                                                                                                              | 145.78  | 368.98  | 0.40 | 3.86E-04 | 1.55E-03 |

|      |   |               |            |           |                                                                                                                                                                                                                                                                                                                                                                                                                                                                                                                                                                                                                                                                                                                                                              |        |         |      |          |          |
|------|---|---------------|------------|-----------|--------------------------------------------------------------------------------------------------------------------------------------------------------------------------------------------------------------------------------------------------------------------------------------------------------------------------------------------------------------------------------------------------------------------------------------------------------------------------------------------------------------------------------------------------------------------------------------------------------------------------------------------------------------------------------------------------------------------------------------------------------------|--------|---------|------|----------|----------|
| 2389 | 3 | F2-3 vs. L2-3 | 250433_at  | AT5G10400 | Histone superfamily protein;(source:Araport11)                                                                                                                                                                                                                                                                                                                                                                                                                                                                                                                                                                                                                                                                                                               | 93.40  | 231.58  | 0.40 | 2.92E-05 | 2.45E-04 |
| 2390 | 3 | F2-3 vs. L2-3 | 246489_at  | AT5G16050 | Encodes GF14 epsilon chain, a 14-3-3 gene family member.                                                                                                                                                                                                                                                                                                                                                                                                                                                                                                                                                                                                                                                                                                     | 301.27 | 761.10  | 0.40 | 1.05E-04 | 6.09E-04 |
|      |   |               |            |           | Encodes a polypeptide involved in the C-6 oxidation of brassinosteroids. Heterologous expression of the protein in yeast conferred the ability to catalyze multiple reactions in which the C-6 position of 6-deoxocastasterone, 6-deoxytyphasterol, 3-dehydro-6-deoxoteasterone and 6-deoxoteasterone are oxidized.                                                                                                                                                                                                                                                                                                                                                                                                                                          |        |         |      |          |          |
| 2391 | 3 | F2-3 vs. L2-3 | 249484_at  | AT5G38970 |                                                                                                                                                                                                                                                                                                                                                                                                                                                                                                                                                                                                                                                                                                                                                              | 11.80  | 29.48   | 0.40 | 4.28E-04 | 1.67E-03 |
| 2392 | 3 | F2-3 vs. L2-3 | 247692_s_a | AT5G59970 | Histone superfamily protein;(source:Araport11)                                                                                                                                                                                                                                                                                                                                                                                                                                                                                                                                                                                                                                                                                                               | 429.58 | 1079.90 | 0.40 | 1.92E-04 | 9.24E-04 |
| 2393 | 3 | F2-3 vs. L2-3 | 263258_at  | AT1G10540 | nucleobase-ascorbate transporter 8;(source:Araport11)                                                                                                                                                                                                                                                                                                                                                                                                                                                                                                                                                                                                                                                                                                        | 56.72  | 145.42  | 0.39 | 3.67E-05 | 2.88E-04 |
| 2394 | 3 | F2-3 vs. L2-3 | 261207_at  | AT1G12830 | nucleolin;(source:Araport11)                                                                                                                                                                                                                                                                                                                                                                                                                                                                                                                                                                                                                                                                                                                                 | 44.17  | 114.61  | 0.39 | 1.20E-04 | 6.65E-04 |
| 2395 | 3 | F2-3 vs. L2-3 | 262417_at  | AT1G50170 | encodes sirohydrochlorin ferrochelatase catalyzing the last step of the siroheme biosynthesis                                                                                                                                                                                                                                                                                                                                                                                                                                                                                                                                                                                                                                                                | 49.43  | 125.99  | 0.39 | 6.40E-06 | 8.73E-05 |
| 2396 | 3 | F2-3 vs. L2-3 | 263156_at  | AT1G54030 | Encodes a vacuolar protein. Mutation causes organizational defects in the endoplasmic reticulum and aberrant protein trafficking in the plant secretory pathway.The mRNA is cell-to-cell mobile.                                                                                                                                                                                                                                                                                                                                                                                                                                                                                                                                                             | 141.21 | 361.63  | 0.39 | 1.27E-04 | 6.99E-04 |
| 2397 | 3 | F2-3 vs. L2-3 | 260401_at  | AT1G69840 | SPFH/Band 7/PHB domain-containing membrane-associated protein family;(source:Araport11)                                                                                                                                                                                                                                                                                                                                                                                                                                                                                                                                                                                                                                                                      | 115.04 | 294.15  | 0.39 | 1.38E-04 | 7.38E-04 |
| 2398 | 3 | F2-3 vs. L2-3 | 259978_at  | AT1G76540 | Encodes a cyclin-dependent protein kinase involved in regulation of the G2/M transition of the mitotic cell cycle. Specifically binds to the cyclin CYCD4;1, expressed in shoot meristem, young leaves and vascular tissue during the G2/M phase. Required for proper organization of the shoot apical meristem and for hormone signaling. Glycine-rich protein (AtGRP2b). Also named as CSP4 (cold shock domain protein 4) containing a well conserved cold shock domain (CSD) and glycine-rich motifs interspersed by two retroviral-like CCHC zinc fingers. AtCSP4 is expressed in all tissues but accumulates in reproductive tissues and those undergoing cell divisions. Overexpression of AtCSP4 reduces silique length and induces embryo lethality. | 61.37  | 159.14  | 0.39 | 2.14E-04 | 1.00E-03 |
| 2399 | 3 | F2-3 vs. L2-3 | 264026_at  | AT2G21060 | Encodes a member of a plant-specific gene family that is required for embryo provasculture development. The gene product regulates vascular network complexity and connectivity in cotyledons.                                                                                                                                                                                                                                                                                                                                                                                                                                                                                                                                                               | 22.15  | 57.49   | 0.39 | 1.76E-05 | 1.77E-04 |
| 2400 | 3 | F2-3 vs. L2-3 | 266358_at  | AT2G32280 | Mitochondrial transcription termination factor family member.                                                                                                                                                                                                                                                                                                                                                                                                                                                                                                                                                                                                                                                                                                | 57.21  | 146.13  | 0.39 | 1.54E-05 | 1.61E-04 |
| 2401 | 3 | F2-3 vs. L2-3 | 266899_at  | AT2G34620 | Encodes a 3-methyladenine-DNA glycosylase. Arabdiopsis cDNA complements the methyl methanesulfonate-sensitive phenotype of an Escherichia coli double mutant deficient in 3-methyladenine glycosylases (DNA-3-methyladenine glycosidases I and II, EC 3.2.2.20 and 3.2.2.21, respectively, encoded by tag and alkA).                                                                                                                                                                                                                                                                                                                                                                                                                                         | 73.85  | 191.31  | 0.39 | 2.85E-04 | 1.24E-03 |
| 2402 | 3 | F2-3 vs. L2-3 | 256664_at  | AT3G12040 | CHC protein involved in cell cycle progression (positive regulator).                                                                                                                                                                                                                                                                                                                                                                                                                                                                                                                                                                                                                                                                                         | 22.99  | 58.33   | 0.39 | 3.86E-04 | 1.55E-03 |
| 2403 | 3 | F2-3 vs. L2-3 | 258324_at  | AT3G22780 | Encodes a pectate lyase involved in response to nematodes.                                                                                                                                                                                                                                                                                                                                                                                                                                                                                                                                                                                                                                                                                                   | 78.53  | 203.90  | 0.39 | 1.04E-04 | 6.05E-04 |
| 2404 | 3 | F2-3 vs. L2-3 | 254119_at  | AT4G24780 | Encodes a putative plastidic glucose transporter.                                                                                                                                                                                                                                                                                                                                                                                                                                                                                                                                                                                                                                                                                                            | 51.75  | 133.43  | 0.39 | 7.59E-04 | 2.58E-03 |
| 2405 | 3 | F2-3 vs. L2-3 | 246508_at  | AT5G16150 | encodes a novel protein involved in DNA repair from UV damage. Isolated by functional complementation of E. coli UV-sensitive mutants (UVR genes).                                                                                                                                                                                                                                                                                                                                                                                                                                                                                                                                                                                                           | 210.32 | 545.06  | 0.39 | 1.15E-05 | 1.30E-04 |
| 2406 | 3 | F2-3 vs. L2-3 | 250015_at  | AT5G18070 | DNA glycosylase superfamily protein;(source:Araport11)                                                                                                                                                                                                                                                                                                                                                                                                                                                                                                                                                                                                                                                                                                       | 40.69  | 103.28  | 0.39 | 2.14E-05 | 1.97E-04 |
| 2407 | 3 | F2-3 vs. L2-3 | 247892_at  | AT5G57970 | encodes an SC35-like splicing factor of 35 kD localized to the nuclear specks.                                                                                                                                                                                                                                                                                                                                                                                                                                                                                                                                                                                                                                                                               | 85.87  | 219.41  | 0.39 | 5.62E-04 | 2.05E-03 |
| 2408 | 3 | F2-3 vs. L2-3 | 247325_at  | AT5G64200 | Encodes a gene similar to cellulose synthase. Knock-out mutant has reduced growth, reduced xylan level and reduced xylan synthase activity in stems.It's expression is cell cycle dependent and it appears to function in cell plate formation.                                                                                                                                                                                                                                                                                                                                                                                                                                                                                                              | 122.19 | 313.72  | 0.39 | 5.00E-07 | 1.44E-05 |
| 2409 | 3 | F2-3 vs. L2-3 | 262109_at  | AT1G02730 | Encodes an enzyme putatively involved in trehalose biosynthesis. The protein has a trehalose synthase (TPS)-like domain that may or may not be active as well as a trehalose phosphatase (TPP)-like domain.                                                                                                                                                                                                                                                                                                                                                                                                                                                                                                                                                  | 97.34  | 257.45  | 0.38 | 1.54E-04 | 7.97E-04 |
| 2410 | 3 | F2-3 vs. L2-3 | 266072_at  | AT2G18700 | ABC-2 type transporter family protein;(source:Araport11)                                                                                                                                                                                                                                                                                                                                                                                                                                                                                                                                                                                                                                                                                                     | 336.90 | 885.74  | 0.38 | 8.17E-04 | 2.74E-03 |
| 2411 | 3 | F2-3 vs. L2-3 | 256970_at  | AT3G21090 | Encodes a protein with E3 ubiquitin ligase activity that is involved in negative regulation of salt stress tolerance during germination.                                                                                                                                                                                                                                                                                                                                                                                                                                                                                                                                                                                                                     | 47.41  | 123.49  | 0.38 | 5.89E-04 | 2.12E-03 |
| 2412 | 3 | F2-3 vs. L2-3 | 252230_at  | AT3G49810 | dual specificity protein phosphatase-like protein;(source:Araport11)                                                                                                                                                                                                                                                                                                                                                                                                                                                                                                                                                                                                                                                                                         | 34.10  | 89.10   | 0.38 | 1.90E-06 | 3.89E-05 |
| 2413 | 3 | F2-3 vs. L2-3 | 254628_at  | AT4G18593 | SBB1 is a putative nucleoporin that is localized to the nuclear envelope. SBB1 was identified in a screen for supressors of BAK1, BKK1 mediated cell death.                                                                                                                                                                                                                                                                                                                                                                                                                                                                                                                                                                                                  | 34.55  | 90.49   | 0.38 | 8.61E-04 | 2.86E-03 |
| 2414 | 3 | F2-3 vs. L2-3 | 253388_at  | AT4G32910 | RAB GTPase homolog A1C;(source:Araport11)                                                                                                                                                                                                                                                                                                                                                                                                                                                                                                                                                                                                                                                                                                                    | 96.65  | 253.97  | 0.38 | 1.78E-04 | 8.82E-04 |
| 2415 | 3 | F2-3 vs. L2-3 | 248914_at  | AT5G45750 |                                                                                                                                                                                                                                                                                                                                                                                                                                                                                                                                                                                                                                                                                                                                                              | 101.78 | 269.70  | 0.38 | 3.40E-05 | 2.73E-04 |



|      |   |               |            |           |                                                                                                                                                                                                                                                                                                                                                                                                                                                                                                                                                                                                                                                                                                                                                                              |        |         |      |          |          |
|------|---|---------------|------------|-----------|------------------------------------------------------------------------------------------------------------------------------------------------------------------------------------------------------------------------------------------------------------------------------------------------------------------------------------------------------------------------------------------------------------------------------------------------------------------------------------------------------------------------------------------------------------------------------------------------------------------------------------------------------------------------------------------------------------------------------------------------------------------------------|--------|---------|------|----------|----------|
|      |   |               |            |           | A member of mei2-like gene family, predominantly plant-based family of genes encoding RNA binding proteins with characteristic presence of a highly conserved RNA binding motif first described in the mei2 gene of the fission yeast <i>S. pombe</i> . In silico analyses reveal nine mei2-like genes in <i>A. thaliana</i> . They were grouped into four distinct clades, based on overall sequence similarity and subfamily-specific sequence elements. AML1 is a member of two sister clades of mei2-like gene family, AML1 through AML5 and belongs to the clade named ALM14. AML1 is expressed during early embryo development, particularly along embryonic axis at torpedo stage, in shoot apex (weaker expression) and in the organogenic regions of floral apices. |        |         |      |          |          |
| 2416 | 3 | F2-3 vs. L2-3 | 247506_at  | AT5G61960 |                                                                                                                                                                                                                                                                                                                                                                                                                                                                                                                                                                                                                                                                                                                                                                              | 68.00  | 180.74  | 0.38 | 3.00E-07 | 1.05E-05 |
| 2417 | 3 | F2-3 vs. L2-3 | 244974_at  | ATCG00700 | PSII low MW protein                                                                                                                                                                                                                                                                                                                                                                                                                                                                                                                                                                                                                                                                                                                                                          | 49.80  | 130.99  | 0.38 | 4.85E-04 | 1.83E-03 |
|      |   |               |            |           | Encodes a protein disulfide isomerase-like (PDIL) protein, a member of a multigene family within the thioredoxin (TRX) superfamily; isoform contains non-consensus GA donor splice site at intron 9. Transcript levels for this gene are up-regulated in response to three different chemical inducers of ER stress (dithiothreitol, beta-mercaptoethanol, and tunicamycin). Neither AtIRE1-2 nor AtbZIP60 appear to be required for this response. The mRNA is cell-to-cell mobile.                                                                                                                                                                                                                                                                                         |        |         |      |          |          |
| 2418 | 3 | F2-3 vs. L2-3 | 262504_at  | AT1G21750 | Transducin/WD40 repeat-like superfamily protein;(source:Araport11)                                                                                                                                                                                                                                                                                                                                                                                                                                                                                                                                                                                                                                                                                                           | 47.03  | 126.01  | 0.37 | 3.43E-05 | 2.74E-04 |
| 2419 | 3 | F2-3 vs. L2-3 | 255499_at  | AT4G02730 | Ribosomal protein L7Ae/L30e/S12e/Gadd45 family protein;(source:Araport11)                                                                                                                                                                                                                                                                                                                                                                                                                                                                                                                                                                                                                                                                                                    | 93.50  | 249.85  | 0.37 | 6.43E-05 | 4.32E-04 |
| 2420 | 3 | F2-3 vs. L2-3 | 254831_at  | AT4G12600 | Protein kinase superfamily protein;(source:Araport11)                                                                                                                                                                                                                                                                                                                                                                                                                                                                                                                                                                                                                                                                                                                        | 52.97  | 142.73  | 0.37 | 3.08E-04 | 1.32E-03 |
| 2421 | 3 | F2-3 vs. L2-3 | 259273_s_a | AT5G15080 | cytochrome c oxidase subunit 1                                                                                                                                                                                                                                                                                                                                                                                                                                                                                                                                                                                                                                                                                                                                               | 38.66  | 104.36  | 0.37 | 9.78E-04 | 3.16E-03 |
| 2422 | 3 | F2-3 vs. L2-3 | 257333_at  | ATMG01360 |                                                                                                                                                                                                                                                                                                                                                                                                                                                                                                                                                                                                                                                                                                                                                                              | 367.64 | 992.87  | 0.37 | 3.26E-04 | 1.37E-03 |
|      |   |               | 262924_s_a |           |                                                                                                                                                                                                                                                                                                                                                                                                                                                                                                                                                                                                                                                                                                                                                                              |        |         |      |          |          |
| 2423 | 3 | F2-3 vs. L2-3 | t          | AT1G75630 | vacuolar H <sup>+</sup> -pumping ATPase 16 kD proteolipid (ava-p) mRNA, The mRNA is cell-to-cell mobile.                                                                                                                                                                                                                                                                                                                                                                                                                                                                                                                                                                                                                                                                     | 626.36 | 1742.68 | 0.36 | 1.25E-05 | 1.39E-04 |
| 2424 | 3 | F2-3 vs. L2-3 | 263631_at  | AT2G04900 | hypothetical protein;(source:Araport11)                                                                                                                                                                                                                                                                                                                                                                                                                                                                                                                                                                                                                                                                                                                                      | 47.82  | 132.82  | 0.36 | 4.47E-05 | 3.35E-04 |
| 2425 | 3 | F2-3 vs. L2-3 | 266294_at  | AT2G29500 | HSP20-like chaperones superfamily protein;(source:Araport11)                                                                                                                                                                                                                                                                                                                                                                                                                                                                                                                                                                                                                                                                                                                 | 15.84  | 43.50   | 0.36 | 2.66E-05 | 2.30E-04 |
| 2426 | 3 | F2-3 vs. L2-3 | 263286_at  | AT2G36160 | Ribosomal protein S11 family protein;(source:Araport11)                                                                                                                                                                                                                                                                                                                                                                                                                                                                                                                                                                                                                                                                                                                      | 75.34  | 209.30  | 0.36 | 1.01E-04 | 5.93E-04 |
|      |   |               |            |           | Encodes a member of KPP-like gene family, homolog of KPP (kinase partner protein) gene in tomato. Also a member of the RopGEF (guanine nucleotide exchange factor) family, containing the novel PRONE domain (plant-specific Rop nucleotide exchanger), which is exclusively active towards members of the Rop subfamily.                                                                                                                                                                                                                                                                                                                                                                                                                                                    |        |         |      |          |          |
| 2427 | 3 | F2-3 vs. L2-3 | 251778_at  | AT3G55660 | SNF7 family protein;(source:Araport11)                                                                                                                                                                                                                                                                                                                                                                                                                                                                                                                                                                                                                                                                                                                                       | 70.38  | 197.88  | 0.36 | 5.30E-06 | 7.62E-05 |
| 2428 | 3 | F2-3 vs. L2-3 | 249060_at  | AT5G44560 | pollen Ole e I family allergen protein;(source:Araport11)                                                                                                                                                                                                                                                                                                                                                                                                                                                                                                                                                                                                                                                                                                                    | 77.67  | 217.91  | 0.36 | 2.41E-05 | 2.15E-04 |
| 2429 | 3 | F2-3 vs. L2-3 | 263373_at  | AT2G20515 | RING/U-box superfamily protein;(source:Araport11)                                                                                                                                                                                                                                                                                                                                                                                                                                                                                                                                                                                                                                                                                                                            | 21.59  | 61.00   | 0.35 | 4.33E-04 | 1.69E-03 |
| 2430 | 3 | F2-3 vs. L2-3 | 257967_at  | AT3G19910 |                                                                                                                                                                                                                                                                                                                                                                                                                                                                                                                                                                                                                                                                                                                                                                              | 351.36 | 1013.35 | 0.35 | 1.80E-06 | 3.80E-05 |
|      |   |               |            |           | Highly similar to <i>Saccharomyces cerevisiae</i> NBP35, locus YGL091C. Cytosolic protein that homodimerizes and can assemble both 4Fe-4S - type and 2Fe-2S - type clusters on its amino terminal and carboxy terminal respectively. Null mutants are embryo lethal.                                                                                                                                                                                                                                                                                                                                                                                                                                                                                                         |        |         |      |          |          |
| 2431 | 3 | F2-3 vs. L2-3 | 248462_at  | AT5G50960 |                                                                                                                                                                                                                                                                                                                                                                                                                                                                                                                                                                                                                                                                                                                                                                              | 90.33  | 260.94  | 0.35 | 1.94E-05 | 1.88E-04 |
| 2432 | 3 | F2-3 vs. L2-3 | 257474_at  | AT1G80850 | DNA glycosylase superfamily protein;(source:Araport11)                                                                                                                                                                                                                                                                                                                                                                                                                                                                                                                                                                                                                                                                                                                       | 71.82  | 212.17  | 0.34 | 6.04E-05 | 4.15E-04 |
|      |   |               |            |           | Encodes a protein disulfide isomerase-like (PDIL) protein, a member of a multigene family within the thioredoxin (TRX) superfamily. This protein also belongs to the adenosine 5'-phosphosulfate reductase-like (APRL) group. The mRNA is cell-to-cell mobile.                                                                                                                                                                                                                                                                                                                                                                                                                                                                                                               |        |         |      |          |          |
| 2433 | 3 | F2-3 vs. L2-3 | 259349_at  | AT3G03860 |                                                                                                                                                                                                                                                                                                                                                                                                                                                                                                                                                                                                                                                                                                                                                                              | 30.96  | 90.85   | 0.34 | 2.84E-05 | 2.41E-04 |
|      |   |               |            |           | Involved in gene silencing. Locus-specific regulator of 24nt-siRNA expression, works together with CLSY1-3 as the master regulators of essentially all Pol-IV-dependent 24nt-siRNAs. Encodes a protein that functions in microtubule assembly. PLP3a can bind to several different tubulin family members in Y2H assays. Plants with reduced levels of both PLP3a and PLP3b (At5g66410) show defects in cytokinesis, cortical microtubule array formation, oriented cell growth, and maintenance of proper ploidy.                                                                                                                                                                                                                                                           |        |         |      |          |          |
| 2434 | 3 | F2-3 vs. L2-3 | 257167_at  | AT3G24340 |                                                                                                                                                                                                                                                                                                                                                                                                                                                                                                                                                                                                                                                                                                                                                                              | 25.01  | 73.94   | 0.34 | 6.57E-04 | 2.31E-03 |
| 2435 | 3 | F2-3 vs. L2-3 | 252127_at  | AT3G50960 | Remorin family protein;(source:Araport11)                                                                                                                                                                                                                                                                                                                                                                                                                                                                                                                                                                                                                                                                                                                                    | 35.00  | 103.22  | 0.34 | 1.00E-07 | 4.57E-06 |
| 2436 | 3 | F2-3 vs. L2-3 | 246205_at  | AT4G36970 | O-Glycosyl hydrolases family 17 protein;(source:Araport11)                                                                                                                                                                                                                                                                                                                                                                                                                                                                                                                                                                                                                                                                                                                   | 126.05 | 367.33  | 0.34 | 2.30E-06 | 4.39E-05 |
| 2437 | 3 | F2-3 vs. L2-3 | 247963_at  | AT5G56590 | Involved in response to salt stress. Knockout mutants are hypersensitive to salt stress. The mRNA is cell-to-cell mobile.                                                                                                                                                                                                                                                                                                                                                                                                                                                                                                                                                                                                                                                    | 164.63 | 479.73  | 0.34 | 5.00E-07 | 1.44E-05 |
| 2438 | 3 | F2-3 vs. L2-3 | 262609_at  | AT1G13930 | RING/FYVE/PHD zinc finger superfamily protein;(source:Araport11)                                                                                                                                                                                                                                                                                                                                                                                                                                                                                                                                                                                                                                                                                                             | 67.87  | 203.41  | 0.33 | 6.39E-05 | 4.30E-04 |
| 2439 | 3 | F2-3 vs. L2-3 | 256426_at  | AT1G33420 | sugar phosphate exchanger, putative (DUF506);(source:Araport11)                                                                                                                                                                                                                                                                                                                                                                                                                                                                                                                                                                                                                                                                                                              | 90.62  | 276.69  | 0.33 | 3.51E-04 | 1.45E-03 |
| 2440 | 3 | F2-3 vs. L2-3 | 265387_at  | AT2G20670 | Phosphoglycerate mutase family protein;(source:Araport11)                                                                                                                                                                                                                                                                                                                                                                                                                                                                                                                                                                                                                                                                                                                    | 39.49  | 120.55  | 0.33 | 6.20E-06 | 8.57E-05 |
| 2441 | 3 | F2-3 vs. L2-3 | 252995_at  | AT4G38370 |                                                                                                                                                                                                                                                                                                                                                                                                                                                                                                                                                                                                                                                                                                                                                                              | 73.30  | 220.70  | 0.33 | 7.23E-04 | 2.48E-03 |

|      |   |               |            |           |                                                                                                                                                                                                                                                                                                                                                                                                                                                                                                                              |        |         |      |          |          |
|------|---|---------------|------------|-----------|------------------------------------------------------------------------------------------------------------------------------------------------------------------------------------------------------------------------------------------------------------------------------------------------------------------------------------------------------------------------------------------------------------------------------------------------------------------------------------------------------------------------------|--------|---------|------|----------|----------|
| 2442 | 3 | F2-3 vs. L2-3 | 246856_at  | AT5G26210 | Encodes a member of the Alfin1-like family of nuclear-localized PHD (plant homeodomain) domain containing proteins. All AL proteins except AL3 bind to di- or trimethylated histone H3 (H3K4me3/2). Members of this family include: AT5G05610 (AL1), AT3G11200 (AL2), AT3G42790 (AL3), AT5G26210 (AL4), AT5G20510 (AL5), AT2G02470 (AL6), AT1G14510 (AL7).                                                                                                                                                                   | 128.80 | 394.58  | 0.33 | 1.98E-05 | 1.89E-04 |
| 2443 | 3 | F2-3 vs. L2-3 | 255782_at  | AT1G19850 | Encodes a transcription factor (IAA24) mediating embryo axis formation and vascular development. Similar to AUXIN RESPONSIVE FACTOR 1 (ARF1) shown to bind to auxin responsive elements (AREs), and to the maize transcriptional activator VIVIPAROUS 1( VP1). In situ hybridization shows expression in provascular tissue of embryos, the emerging shoot primordia, then is restricted to provascular tissue, and in the root central vascular cylinder.                                                                   | 65.28  | 203.31  | 0.32 | 6.06E-04 | 2.18E-03 |
| 2444 | 3 | F2-3 vs. L2-3 | 259541_at  | AT1G20650 | Protein kinase superfamily protein;(source:Araport11)                                                                                                                                                                                                                                                                                                                                                                                                                                                                        | 20.41  | 63.81   | 0.32 | 7.65E-04 | 2.59E-03 |
| 2445 | 3 | F2-3 vs. L2-3 | 261729_s_a | AT1G47845 | hexokinase;(source:Araport11)                                                                                                                                                                                                                                                                                                                                                                                                                                                                                                | 19.80  | 61.25   | 0.32 | 2.52E-04 | 1.13E-03 |
| 2446 | 3 | F2-3 vs. L2-3 | 266106_at  | AT2G45170 | Involved in autophagy. Under nutrient starvation the protein localizes to autophagosomes.                                                                                                                                                                                                                                                                                                                                                                                                                                    | 14.27  | 44.33   | 0.32 | 4.64E-05 | 3.43E-04 |
| 2447 | 3 | F2-3 vs. L2-3 | 257879_at  | AT3G17160 | hypothetical protein;(source:Araport11)                                                                                                                                                                                                                                                                                                                                                                                                                                                                                      | 144.72 | 453.33  | 0.32 | 6.00E-07 | 1.65E-05 |
| 2448 | 3 | F2-3 vs. L2-3 | 258041_at  | AT3G21175 | member of a novel family of plant-specific GATA-type transcription factors.                                                                                                                                                                                                                                                                                                                                                                                                                                                  | 32.38  | 99.97   | 0.32 | 4.60E-06 | 6.78E-05 |
| 2449 | 3 | F2-3 vs. L2-3 | 253597_at  | AT4G30690 | SVR9-LIKE1 (SVR9L1)                                                                                                                                                                                                                                                                                                                                                                                                                                                                                                          | 48.91  | 152.91  | 0.32 | 1.00E-07 | 4.57E-06 |
| 2450 | 3 | F2-3 vs. L2-3 | 261019_at  | AT1G26470 | chromatin modification-like protein;(source:Araport11)                                                                                                                                                                                                                                                                                                                                                                                                                                                                       | 28.14  | 90.68   | 0.31 | 1.90E-06 | 3.89E-05 |
| 2451 | 3 | F2-3 vs. L2-3 | 245814_at  | AT1G49910 | Encodes a homolog of the yeast and human BUB3 (BUDDING UNINHIBITED BY BENZYMIDAZOL 3) protein. Yeast and human BUB3s function in spindle assembly checkpoint control.                                                                                                                                                                                                                                                                                                                                                        | 17.92  | 58.27   | 0.31 | 3.35E-04 | 1.40E-03 |
| 2452 | 3 | F2-3 vs. L2-3 | 267472_at  | AT2G02850 | Encodes plantacyanin one of blue copper proteins. Involved in anther development and pollination. Expressed in the transmitting tract of the pistil.                                                                                                                                                                                                                                                                                                                                                                         | 256.96 | 830.09  | 0.31 | 3.00E-07 | 1.05E-05 |
| 2453 | 3 | F2-3 vs. L2-3 | 255257_at  | AT4G05050 | polyubiquitin gene, belongs to a subtype group with UBQ10 and UBQ14. Various ecotypes of Arabidopsis have different numbers of ubiquitin repeats within this gene.                                                                                                                                                                                                                                                                                                                                                           | 82.71  | 265.79  | 0.31 | 1.31E-04 | 7.13E-04 |
| 2454 | 3 | F2-3 vs. L2-3 | 254853_at  | AT4G12080 | AT-hook motif nuclear-localized protein 1;(source:Araport11)                                                                                                                                                                                                                                                                                                                                                                                                                                                                 | 41.02  | 132.56  | 0.31 | 2.30E-05 | 2.08E-04 |
| 2455 | 3 | F2-3 vs. L2-3 | 246090_at  | AT5G20520 | Encodes a Bem46-like protein. WAV2 negatively regulates root bending when roots alter their growth direction. It's not involved in sensing environmental stimuli (e.g. gravity, light, water, touch).                                                                                                                                                                                                                                                                                                                        | 83.16  | 267.73  | 0.31 | 9.00E-07 | 2.22E-05 |
| 2456 | 3 | F2-3 vs. L2-3 | 248842_at  | AT5G46850 | phosphatidylinositol-glycan biosynthesis class X-like protein;(source:Araport11)                                                                                                                                                                                                                                                                                                                                                                                                                                             | 96.10  | 305.56  | 0.31 | 4.00E-07 | 1.25E-05 |
| 2457 | 3 | F2-3 vs. L2-3 | 248427_at  | AT5G51750 | subtilase 1.3;(source:Araport11)                                                                                                                                                                                                                                                                                                                                                                                                                                                                                             | 498.84 | 1592.99 | 0.31 | 7.37E-05 | 4.71E-04 |
| 2458 | 3 | F2-3 vs. L2-3 | 247192_at  | AT5G65360 | Histone superfamily protein;(source:Araport11)                                                                                                                                                                                                                                                                                                                                                                                                                                                                               | 30.17  | 96.58   | 0.31 | 3.41E-04 | 1.42E-03 |
| 2459 | 3 | F2-3 vs. L2-3 | 262785_at  | AT1G10750 | carboxyl-terminal peptidase, putative (DUF239);(source:Araport11)                                                                                                                                                                                                                                                                                                                                                                                                                                                            | 44.59  | 149.46  | 0.30 | 1.50E-06 | 3.34E-05 |
| 2460 | 3 | F2-3 vs. L2-3 | 255775_at  | AT1G18600 | Mitochondrion-located rhomboid-like protein                                                                                                                                                                                                                                                                                                                                                                                                                                                                                  | 45.72  | 154.56  | 0.30 | 1.90E-06 | 3.89E-05 |
| 2461 | 3 | F2-3 vs. L2-3 | 260673_at  | AT1G19330 | Evening-expressed key component of Sin3-HDAC complex, which bind directly to the CIRCADIAN CLOCK ASSOCIATED 1 (CCA1) and PSEUDO-RESPONSE REGULATOR 9 (PRR9) promoters and catalyze histone 3 (H3) deacetylation at the cognate regions to repress expression, allowing the declining phase of their expression at dusk. Encodes a subunit of the WAVE complex. The WAVE complex is required for activation of ARP2/3 complex which functions in actin microfilament nucleation and branching. One of four ABI-like proteins. | 77.96  | 255.70  | 0.30 | 4.84E-05 | 3.54E-04 |
| 2462 | 3 | F2-3 vs. L2-3 | 266591_at  | AT2G46225 | Cytidine triphosphate synthase.                                                                                                                                                                                                                                                                                                                                                                                                                                                                                              | 78.73  | 260.66  | 0.30 | 6.00E-06 | 8.44E-05 |
| 2463 | 3 | F2-3 vs. L2-3 | 257702_at  | AT3G12670 | Ribosomal protein S5 family protein;(source:Araport11)                                                                                                                                                                                                                                                                                                                                                                                                                                                                       | 54.01  | 177.21  | 0.30 | 9.40E-06 | 1.14E-04 |
| 2464 | 3 | F2-3 vs. L2-3 | 251638_at  | AT3G57490 | Lactate/malate dehydrogenase family protein;(source:Araport11)                                                                                                                                                                                                                                                                                                                                                                                                                                                               | 38.82  | 130.47  | 0.30 | 1.53E-05 | 1.60E-04 |
| 2465 | 3 | F2-3 vs. L2-3 | 245324_at  | AT4G17260 | A member of ROP GTPase gene family; Encodes a Rho-like GTP binding protein.                                                                                                                                                                                                                                                                                                                                                                                                                                                  | 68.57  | 231.38  | 0.30 | < 1e-07  | 4.57E-06 |
| 2466 | 3 | F2-3 vs. L2-3 | 253225_at  | AT4G35020 | serine-rich protein-like protein;(source:Araport11)                                                                                                                                                                                                                                                                                                                                                                                                                                                                          | 96.47  | 317.75  | 0.30 | 4.10E-06 | 6.26E-05 |
| 2467 | 3 | F2-3 vs. L2-3 | 246917_at  | AT5G25280 | Calcium-dependent lipid-binding (CaLB domain) family protein;(source:Araport11)                                                                                                                                                                                                                                                                                                                                                                                                                                              | 27.26  | 90.99   | 0.30 | 2.29E-05 | 2.08E-04 |
| 2468 | 3 | F2-3 vs. L2-3 | 248767_at  | AT5G47710 | Encodes a Golgi-localized hydroxyproline-O-galactosyltransferase.                                                                                                                                                                                                                                                                                                                                                                                                                                                            | 153.01 | 517.82  | 0.30 | 5.00E-07 | 1.44E-05 |
| 2469 | 3 | F2-3 vs. L2-3 | 264978_at  | AT1G27120 | Galactosyltransferase family protein;(source:Araport11)                                                                                                                                                                                                                                                                                                                                                                                                                                                                      | 96.02  | 326.51  | 0.29 | 8.00E-07 | 2.05E-05 |
| 2470 | 3 | F2-3 vs. L2-3 | 261239_at  | AT1G32930 | Cyclin-dependent protein kinase CYCB1;1. Functions as an effector of growth control at G2/M.                                                                                                                                                                                                                                                                                                                                                                                                                                 | 114.94 | 397.22  | 0.29 | < 1e-07  | < 1e-07  |
| 2471 | 3 | F2-3 vs. L2-3 | 253051_at  | AT4G37490 | Regulated by TCP20.                                                                                                                                                                                                                                                                                                                                                                                                                                                                                                          | 40.45  | 141.07  | 0.29 | 2.33E-04 | 1.07E-03 |
| 2472 | 3 | F2-3 vs. L2-3 | 247770_at  | AT5G58930 | hypothetical protein (DUF740);(source:Araport11)                                                                                                                                                                                                                                                                                                                                                                                                                                                                             | 112.03 | 379.88  | 0.29 | 5.40E-06 | 7.72E-05 |

|      |   |               |            |           |                                                                                                                                                                                                                                                                                                                                                                                                                                                                                                                                                                                                                                                                                                                                                                                                                                                                                                                                                                                                                                                                                                                                                                                                                                                                                                                                                                                                                                                                                                                                                                            |         |         |      |          |          |
|------|---|---------------|------------|-----------|----------------------------------------------------------------------------------------------------------------------------------------------------------------------------------------------------------------------------------------------------------------------------------------------------------------------------------------------------------------------------------------------------------------------------------------------------------------------------------------------------------------------------------------------------------------------------------------------------------------------------------------------------------------------------------------------------------------------------------------------------------------------------------------------------------------------------------------------------------------------------------------------------------------------------------------------------------------------------------------------------------------------------------------------------------------------------------------------------------------------------------------------------------------------------------------------------------------------------------------------------------------------------------------------------------------------------------------------------------------------------------------------------------------------------------------------------------------------------------------------------------------------------------------------------------------------------|---------|---------|------|----------|----------|
| 2473 | 3 | F2-3 vs. L2-3 | 262989_at  | AT1G23420 | Essential for formation and asymmetric growth of the ovule outer integument. Member of the YABBY protein family of putative transcription factors that contain apparent Cys(2)-Cys(2) zinc-finger domains and regions of similarity to the high mobility group (HMG) transcription factors. INO may be required for polarity determination in the central part of the ovule.<br>C2H2-like zinc finger protein;(source:Araport11)                                                                                                                                                                                                                                                                                                                                                                                                                                                                                                                                                                                                                                                                                                                                                                                                                                                                                                                                                                                                                                                                                                                                           | 22.05   | 79.76   | 0.28 | 3.33E-04 | 1.39E-03 |
| 2474 | 3 | F2-3 vs. L2-3 | 262969_at  | AT1G75710 |                                                                                                                                                                                                                                                                                                                                                                                                                                                                                                                                                                                                                                                                                                                                                                                                                                                                                                                                                                                                                                                                                                                                                                                                                                                                                                                                                                                                                                                                                                                                                                            | 351.06  | 1259.85 | 0.28 | 4.00E-07 | 1.25E-05 |
| 2475 | 3 | F2-3 vs. L2-3 | 265985_at  | AT2G24220 | Member of a family of proteins related to PUP1, a purine transporter. May be involved in the transport of purine and purine derivatives such as cytokinins, across the plasma membrane.<br>Heavy metal transport/detoxification superfamily protein;(source:Araport11)<br>ABC-2 type transporter family protein;(source:Araport11)                                                                                                                                                                                                                                                                                                                                                                                                                                                                                                                                                                                                                                                                                                                                                                                                                                                                                                                                                                                                                                                                                                                                                                                                                                         | 56.49   | 203.32  | 0.28 | 3.00E-07 | 1.05E-05 |
| 2476 | 3 | F2-3 vs. L2-3 | 256621_at  | AT3G24450 |                                                                                                                                                                                                                                                                                                                                                                                                                                                                                                                                                                                                                                                                                                                                                                                                                                                                                                                                                                                                                                                                                                                                                                                                                                                                                                                                                                                                                                                                                                                                                                            | 48.77   | 172.52  | 0.28 | 1.60E-06 | 3.46E-05 |
| 2477 | 3 | F2-3 vs. L2-3 | 263726_at  | AT2G13610 |                                                                                                                                                                                                                                                                                                                                                                                                                                                                                                                                                                                                                                                                                                                                                                                                                                                                                                                                                                                                                                                                                                                                                                                                                                                                                                                                                                                                                                                                                                                                                                            | 56.84   | 208.73  | 0.27 | 7.39E-05 | 4.72E-04 |
| 2478 | 3 | F2-3 vs. L2-3 | 263979_at  | AT2G42840 | Encodes a putative extracellular proline-rich protein is exclusively expressed in the L1 layer of vegetative, inflorescence and floral meristems and the protoderm of organ primordia. During the course of seed coat epidermal cell differentiation, COBRA-LIKE 2 plays a role in cellulose deposition into mucilage secretory cells of Arabidopsis seeds. COBRA-LIKE 2 affects mucilage solubility and cellulosic ray formation.<br>Member of the wound-induced polypeptide (WIP) family. Positively regulates plant resistance against Pst DC3000 by enhancing PTI responses.<br>Encodes an expansin. Naming convention from the Expansin Working Group (Kende et al, 2004. Plant Mol Bio)                                                                                                                                                                                                                                                                                                                                                                                                                                                                                                                                                                                                                                                                                                                                                                                                                                                                              | 367.33  | 1347.40 | 0.27 | 7.19E-04 | 2.48E-03 |
| 2479 | 3 | F2-3 vs. L2-3 | 245228_at  | AT3G29810 |                                                                                                                                                                                                                                                                                                                                                                                                                                                                                                                                                                                                                                                                                                                                                                                                                                                                                                                                                                                                                                                                                                                                                                                                                                                                                                                                                                                                                                                                                                                                                                            | 25.74   | 94.46   | 0.27 | 2.76E-04 | 1.21E-03 |
| 2480 | 3 | F2-3 vs. L2-3 | 253812_at  | AT4G28240 |                                                                                                                                                                                                                                                                                                                                                                                                                                                                                                                                                                                                                                                                                                                                                                                                                                                                                                                                                                                                                                                                                                                                                                                                                                                                                                                                                                                                                                                                                                                                                                            | 78.51   | 295.04  | 0.27 | 4.15E-04 | 1.63E-03 |
| 2481 | 3 | F2-3 vs. L2-3 | 250780_at  | AT5G05290 | Ribosomal protein S4;(source:Araport11)<br>SPT4 homolog 2;(source:Araport11)<br>Bifunctional inhibitor/lipid-transfer protein/seed storage 2S albumin superfamily protein;(source:Araport11)                                                                                                                                                                                                                                                                                                                                                                                                                                                                                                                                                                                                                                                                                                                                                                                                                                                                                                                                                                                                                                                                                                                                                                                                                                                                                                                                                                               | 60.50   | 221.43  | 0.27 | 8.87E-04 | 2.92E-03 |
| 2482 | 3 | F2-3 vs. L2-3 | 249427_at  | AT5G39850 |                                                                                                                                                                                                                                                                                                                                                                                                                                                                                                                                                                                                                                                                                                                                                                                                                                                                                                                                                                                                                                                                                                                                                                                                                                                                                                                                                                                                                                                                                                                                                                            | 241.14  | 897.53  | 0.27 | 2.00E-07 | 7.75E-06 |
| 2483 | 3 | F2-3 vs. L2-3 | 247355_at  | AT5G63670 |                                                                                                                                                                                                                                                                                                                                                                                                                                                                                                                                                                                                                                                                                                                                                                                                                                                                                                                                                                                                                                                                                                                                                                                                                                                                                                                                                                                                                                                                                                                                                                            | 66.65   | 244.42  | 0.27 | 1.40E-06 | 3.16E-05 |
| 2484 | 3 | F2-3 vs. L2-3 | 266123_at  | AT2G45180 | transmembrane protein;(source:Araport11)<br>RNA binding protein;(source:Araport11)                                                                                                                                                                                                                                                                                                                                                                                                                                                                                                                                                                                                                                                                                                                                                                                                                                                                                                                                                                                                                                                                                                                                                                                                                                                                                                                                                                                                                                                                                         | 21.50   | 81.42   | 0.26 | 1.79E-05 | 1.78E-04 |
| 2485 | 3 | F2-3 vs. L2-3 | 258480_at  | AT3G02640 |                                                                                                                                                                                                                                                                                                                                                                                                                                                                                                                                                                                                                                                                                                                                                                                                                                                                                                                                                                                                                                                                                                                                                                                                                                                                                                                                                                                                                                                                                                                                                                            | 70.75   | 271.04  | 0.26 | 1.73E-05 | 1.75E-04 |
| 2486 | 3 | F2-3 vs. L2-3 | 245512_at  | AT4G15770 |                                                                                                                                                                                                                                                                                                                                                                                                                                                                                                                                                                                                                                                                                                                                                                                                                                                                                                                                                                                                                                                                                                                                                                                                                                                                                                                                                                                                                                                                                                                                                                            | 162.00  | 622.76  | 0.26 | < 1e-07  | 4.57E-06 |
| 2487 | 3 | F2-3 vs. L2-3 | 254609_at  | AT4G18970 | GDLSL-motif esterase/acyltransferase/lipase. Enzyme group with broad substrate specificity that may catalyze acyltransfer or hydrolase reactions with lipid and non-lipid substrates.<br>early nodulin-like protein 14;(source:Araport11)<br>transmembrane protein;(source:Araport11)<br>SWIB/MDM2 domain superfamily protein;(source:Araport11)<br>AT hook motif DNA-binding family protein;(source:Araport11)<br>Encodes a protein required for photosystem I assembly and stability. In Chlamydomonas reinhardtii, this protein seems to act as a PSI specific chaperone facilitating the assembly of the complex by interacting with PsA and PsD. A loss of function mutation in tobacco leads to a loss of photosystem I.<br>Encodes a protein with two tandem-arrayed CCCH-type zinc fingers that binds RNA and is involved in RNA turnover. The mRNA is cell-to-cell mobile.<br>CDK-subunit 2;(source:Araport11)<br>Encodes a member of a plant specific family of cyclin dependent kinases.<br>encodes a member of xyloglucan endotransglucosylase/hydrolases (XTHs) that catalyze the cleavage and molecular grafting of xyloglucan chains function in loosening and rearrangement of the cell wall. Gene is expressed in shoot apex region, flower buds, flower stalks and internodes bearing flowers.<br>alpha/beta-Hydrolases superfamily protein;(source:Araport11)<br>Encodes a member of the MAP Kinase Kinase family of proteins. It can phosphorylate MPK12 in vitro and it can be dephosphorylated by MKP2 in vitro.<br>encodes a thaumatin-like protein | 113.02  | 435.70  | 0.26 | 6.82E-04 | 2.38E-03 |
| 2488 | 3 | F2-3 vs. L2-3 | 264377_at  | AT2G25060 |                                                                                                                                                                                                                                                                                                                                                                                                                                                                                                                                                                                                                                                                                                                                                                                                                                                                                                                                                                                                                                                                                                                                                                                                                                                                                                                                                                                                                                                                                                                                                                            | 88.65   | 355.27  | 0.25 | 1.00E-06 | 2.42E-05 |
| 2489 | 3 | F2-3 vs. L2-3 | 263640_at  | AT2G25270 |                                                                                                                                                                                                                                                                                                                                                                                                                                                                                                                                                                                                                                                                                                                                                                                                                                                                                                                                                                                                                                                                                                                                                                                                                                                                                                                                                                                                                                                                                                                                                                            | 25.94   | 105.49  | 0.25 | 4.29E-04 | 1.68E-03 |
| 2490 | 3 | F2-3 vs. L2-3 | 259171_at  | AT3G03590 |                                                                                                                                                                                                                                                                                                                                                                                                                                                                                                                                                                                                                                                                                                                                                                                                                                                                                                                                                                                                                                                                                                                                                                                                                                                                                                                                                                                                                                                                                                                                                                            | 84.99   | 346.17  | 0.25 | 5.00E-07 | 1.44E-05 |
| 2491 | 3 | F2-3 vs. L2-3 | 251365_at  | AT3G61310 |                                                                                                                                                                                                                                                                                                                                                                                                                                                                                                                                                                                                                                                                                                                                                                                                                                                                                                                                                                                                                                                                                                                                                                                                                                                                                                                                                                                                                                                                                                                                                                            | 79.87   | 319.45  | 0.25 | 1.69E-04 | 8.50E-04 |
| 2492 | 3 | F2-3 vs. L2-3 | 245008_at  | ATCG00360 |                                                                                                                                                                                                                                                                                                                                                                                                                                                                                                                                                                                                                                                                                                                                                                                                                                                                                                                                                                                                                                                                                                                                                                                                                                                                                                                                                                                                                                                                                                                                                                            | 1165.10 | 4618.82 | 0.25 | 7.02E-05 | 4.56E-04 |
| 2493 | 3 | F2-3 vs. L2-3 | 266656_at  | AT2G25900 | Encodes a member of a plant specific family of cyclin dependent kinases.<br>encodes a member of xyloglucan endotransglucosylase/hydrolases (XTHs) that catalyze the cleavage and molecular grafting of xyloglucan chains function in loosening and rearrangement of the cell wall. Gene is expressed in shoot apex region, flower buds, flower stalks and internodes bearing flowers.<br>alpha/beta-Hydrolases superfamily protein;(source:Araport11)<br>Encodes a member of the MAP Kinase Kinase family of proteins. It can phosphorylate MPK12 in vitro and it can be dephosphorylated by MKP2 in vitro.<br>encodes a thaumatin-like protein                                                                                                                                                                                                                                                                                                                                                                                                                                                                                                                                                                                                                                                                                                                                                                                                                                                                                                                            | 66.67   | 280.73  | 0.24 | 3.70E-06 | 5.84E-05 |
| 2494 | 3 | F2-3 vs. L2-3 | 264061_at  | AT2G27970 |                                                                                                                                                                                                                                                                                                                                                                                                                                                                                                                                                                                                                                                                                                                                                                                                                                                                                                                                                                                                                                                                                                                                                                                                                                                                                                                                                                                                                                                                                                                                                                            | 83.52   | 341.38  | 0.24 | 5.10E-06 | 7.41E-05 |
| 2495 | 3 | F2-3 vs. L2-3 | 266401_s_a | AT2G38620 |                                                                                                                                                                                                                                                                                                                                                                                                                                                                                                                                                                                                                                                                                                                                                                                                                                                                                                                                                                                                                                                                                                                                                                                                                                                                                                                                                                                                                                                                                                                                                                            | 142.35  | 596.64  | 0.24 | 2.20E-06 | 4.25E-05 |
| 2496 | 3 | F2-3 vs. L2-3 | 255433_at  | AT4G03210 | Encodes a member of the MAP Kinase Kinase family of proteins. It can phosphorylate MPK12 in vitro and it can be dephosphorylated by MKP2 in vitro.<br>encodes a thaumatin-like protein                                                                                                                                                                                                                                                                                                                                                                                                                                                                                                                                                                                                                                                                                                                                                                                                                                                                                                                                                                                                                                                                                                                                                                                                                                                                                                                                                                                     | 71.43   | 303.70  | 0.24 | 4.28E-05 | 3.25E-04 |
| 2497 | 3 | F2-3 vs. L2-3 | 246203_at  | AT4G36610 |                                                                                                                                                                                                                                                                                                                                                                                                                                                                                                                                                                                                                                                                                                                                                                                                                                                                                                                                                                                                                                                                                                                                                                                                                                                                                                                                                                                                                                                                                                                                                                            | 47.06   | 198.61  | 0.24 | 7.46E-04 | 2.54E-03 |
| 2498 | 3 | F2-3 vs. L2-3 | 247962_at  | AT5G56580 |                                                                                                                                                                                                                                                                                                                                                                                                                                                                                                                                                                                                                                                                                                                                                                                                                                                                                                                                                                                                                                                                                                                                                                                                                                                                                                                                                                                                                                                                                                                                                                            | 50.63   | 213.05  | 0.24 | 7.00E-07 | 1.83E-05 |
| 2499 | 3 | F2-3 vs. L2-3 | 256125_at  | AT1G18250 | Encodes an ESCRT-related protein: CHMP1A/AT1G73030; CHMP1B/AT1G7730. CHMP1A and B mediate multivesicular body sorting of auxin carriers and are required for plant development. ESCRT: Endosomal Sorting Complexes Required For Transport machinery; CHMP: Charged Multivesicular Body Protein/Chromatin Modifying Protein.<br>Thioredoxin superfamily protein;(source:Araport11)                                                                                                                                                                                                                                                                                                                                                                                                                                                                                                                                                                                                                                                                                                                                                                                                                                                                                                                                                                                                                                                                                                                                                                                          | 46.70   | 201.76  | 0.23 | 1.35E-05 | 1.48E-04 |
| 2500 | 3 | F2-3 vs. L2-3 | 262367_at  | AT1G73030 |                                                                                                                                                                                                                                                                                                                                                                                                                                                                                                                                                                                                                                                                                                                                                                                                                                                                                                                                                                                                                                                                                                                                                                                                                                                                                                                                                                                                                                                                                                                                                                            | 105.65  | 451.48  | 0.23 | 5.20E-06 | 7.50E-05 |
| 2501 | 3 | F2-3 vs. L2-3 | 263488_at  | AT2G31840 |                                                                                                                                                                                                                                                                                                                                                                                                                                                                                                                                                                                                                                                                                                                                                                                                                                                                                                                                                                                                                                                                                                                                                                                                                                                                                                                                                                                                                                                                                                                                                                            | 35.25   | 151.06  | 0.23 | < 1e-07  | 4.57E-06 |

|      |   |               |            |           |                                                                                                                                                                                                                                                                                                                                                |        |        |      |          |          |
|------|---|---------------|------------|-----------|------------------------------------------------------------------------------------------------------------------------------------------------------------------------------------------------------------------------------------------------------------------------------------------------------------------------------------------------|--------|--------|------|----------|----------|
| 2502 | 3 | F2-3 vs. L2-3 | 258067_at  | AT3G25980 | Encodes MAD2 (MITOTIC ARREST-DEFICIENT 2). May have the spindle assembly checkpoint protein functions conserved from yeast to humans.                                                                                                                                                                                                          | 33.10  | 145.08 | 0.23 | 6.20E-06 | 8.57E-05 |
| 2503 | 3 | F2-3 vs. L2-3 | 263988_at  | AT2G42830 | AGAMOUS [AG]-like MADS box protein (AGL5) involved in fruit development (valve margin and dehiscence zone differentiation). A putative direct target of AG. SHP2 has been shown to be a downstream gene of the complex formed by AG and SEP proteins (SEP4 alone does not form a functional complex with AG).                                  | 121.79 | 555.07 | 0.22 | 7.30E-06 | 9.59E-05 |
| 2504 | 3 | F2-3 vs. L2-3 | 257334_at  | ATMG01370 | transmembrane protein;(source:Araport11)                                                                                                                                                                                                                                                                                                       | 40.84  | 192.48 | 0.21 | 2.36E-04 | 1.08E-03 |
| 2505 | 3 | F2-3 vs. L2-3 | 262667_at  | AT1G62810 | Encodes COPPER AMINE OXIDASE 1 (CuAO1). Contributes to abscisic acid- and polyamine-induced nitric oxide biosynthesis and abscisic acid signal transduction.                                                                                                                                                                                   | 23.98  | 119.14 | 0.20 | 5.33E-04 | 1.97E-03 |
| 2506 | 3 | F2-3 vs. L2-3 | 260181_at  | AT1G70710 | endo-1,4-beta-glucanase. Involved in cell elongation.                                                                                                                                                                                                                                                                                          | 128.94 | 639.18 | 0.20 | 1.34E-05 | 1.48E-04 |
| 2507 | 3 | F2-3 vs. L2-3 | 255727_at  | AT1G25510 | Eukaryotic aspartyl protease family protein;(source:Araport11)                                                                                                                                                                                                                                                                                 | 54.86  | 287.83 | 0.19 | 2.30E-06 | 4.39E-05 |
| 2508 | 3 | F2-3 vs. L2-3 | 260391_at  | AT1G74020 | Encodes AtSS-2 strictosidine synthase.                                                                                                                                                                                                                                                                                                         | 90.21  | 464.14 | 0.19 | 2.11E-04 | 9.94E-04 |
| 2509 | 3 | F2-3 vs. L2-3 | 255277_at  | AT4G04890 | Encodes a homeodomain protein that is expressed in the LI layer of the vegetative, floral and inflorescence meristems. Binds to the L1 box promoter element which is required in some proteins for L1 specific expression.                                                                                                                     | 150.17 | 777.38 | 0.19 | 1.72E-04 | 8.60E-04 |
| 2510 | 3 | F2-3 vs. L2-3 | 248011_at  | AT5G56300 | A member of the Arabidopsis SABATH methyltransferase gene family. Encodes GAMT2, a methyltransferase that uses S-adenosine-L-methionine (SAM) as a methyl donor to methylate the carboxyl group of GAs, resulting in the methyl esters of GAs (MeGAs). Expressed most highly in the siliques during seed development.                          | 30.81  | 161.44 | 0.19 | 3.54E-04 | 1.46E-03 |
| 2511 | 3 | F2-3 vs. L2-3 | 264327_at  | AT1G04170 | protein synthesis initiation factor eIF2 gamma The mRNA is cell-to-cell mobile.                                                                                                                                                                                                                                                                | 15.18  | 85.03  | 0.18 | 4.06E-05 | 3.12E-04 |
| 2512 | 3 | F2-3 vs. L2-3 | 252320_at  | AT3G48580 | xyloglucan endotransglucosylase/hydrolase 11;(source:Araport11)                                                                                                                                                                                                                                                                                | 21.66  | 122.71 | 0.18 | 5.66E-04 | 2.06E-03 |
| 2513 | 3 | F2-3 vs. L2-3 | 246923_at  | AT5G25100 | Endomembrane protein 70 protein family;(source:Araport11)                                                                                                                                                                                                                                                                                      | 25.41  | 137.94 | 0.18 | 2.50E-06 | 4.58E-05 |
| 2514 | 3 | F2-3 vs. L2-3 | 265058_s_a | AT1G52030 | Similar to myrosinase binding proteins which may be involved in metabolizing glucosinolates and forming defense compounds to protect against herbivory. Also similar to lectins and other agglutinating factors. Expressed only in flowers.                                                                                                    | 139.70 | 809.17 | 0.17 | 1.00E-07 | 4.57E-06 |
| 2515 | 3 | F2-3 vs. L2-3 | 253684_at  | AT4G29690 | Alkaline-phosphatase-like family protein;(source:Araport11)                                                                                                                                                                                                                                                                                    | 23.03  | 136.65 | 0.17 | < 1e-07  | < 1e-07  |
| 2516 | 3 | F2-3 vs. L2-3 | 262802_at  | AT1G20930 | Cyclin-dependent kinase, expressed in flowers and suspension cell culture, expression peaks during M phase in synchronized cultures. Required for proper organization of the shoot apical meristem and for hormone signaling. Expressed in the shoot apical meristem. Involved in regulation of the G2/M transition of the mitotic cell cycle. | 39.56  | 247.26 | 0.16 | 3.00E-07 | 1.05E-05 |
| 2517 | 3 | F2-3 vs. L2-3 | 265117_at  | AT1G62500 | Bifunctional inhibitor/lipid-transfer protein/seed storage 2S albumin superfamily protein;(source:Araport11)                                                                                                                                                                                                                                   | 134.35 | 857.43 | 0.16 | 3.83E-04 | 1.54E-03 |
| 2518 | 3 | F2-3 vs. L2-3 | 256243_at  | AT3G12500 | encodes a basic chitinase involved in ethylene/jasmonic acid mediated signalling pathway during systemic acquired resistance based on expression analyses.                                                                                                                                                                                     | 21.56  | 136.72 | 0.16 | < 1e-07  | < 1e-07  |
| 2519 | 3 | F2-3 vs. L2-3 | 251340_at  | AT3G60830 | Encodes an actin-related protein required for normal embryogenesis, plant architecture and floral organ abscission.                                                                                                                                                                                                                            | 64.77  | 404.91 | 0.16 | 2.90E-06 | 5.02E-05 |
| 2520 | 3 | F2-3 vs. L2-3 | 267614_at  | AT2G26710 | Encodes a member of the cytochrome p450 family that serves as a control point between multiple photoreceptor systems and brassinosteroid signal transduction. Involved in brassinolide metabolism. Mediates response to a variety of light signals including hypocotyl elongation and cotyledon expansion.                                     | 20.15  | 135.45 | 0.15 | 2.00E-07 | 7.75E-06 |
| 2521 | 3 | F2-3 vs. L2-3 | 254824_s_a | AT4G12620 | Origin Recognition Complex subunit 1b. Involved in the initiation of DNA replication. Regulated transcriptionally during cell cycle, peaking at G1/S-phase. Target of E2F/DF family of transcription factors. Interacts with ORC2 and ORC5. Highly expressed in proliferating cells. Expression levels are independent of light regime.        | 90.62  | 595.34 | 0.15 | < 1e-07  | < 1e-07  |
| 2522 | 3 | F2-3 vs. L2-3 | 250508_at  | AT5G09950 | Encodes a DYW-class PPR protein required for RNA editing at four sites in mitochondria of A. thaliana.                                                                                                                                                                                                                                         | 20.47  | 162.00 | 0.13 | 2.00E-07 | 7.75E-06 |
| 2523 | 3 | F2-3 vs. L2-3 | 252357_at  | AT3G48410 | alpha/beta-Hydrolases superfamily protein;(source:Araport11)                                                                                                                                                                                                                                                                                   | 22.96  | 194.04 | 0.12 | 5.00E-07 | 1.44E-05 |
| 2524 | 3 | F2-3 vs. L2-3 | 251555_at  | AT3G58780 | One of two genes (SHP1 and SHP2) that are required for fruit dehiscence. The two genes control dehiscence zone differentiation and promote the lignification of adjacent cells.                                                                                                                                                                | 98.71  | 885.62 | 0.11 | < 1e-07  | < 1e-07  |
| 2525 | 3 | F2-3 vs. L2-3 | 262121_at  | AT1G02800 | Encodes a protein with similarity to endo-1,4-b-glucanases and is a member of Glycoside Hydrolase Family 9. CEL2 is induced by nematodes and is expressed in syncytia induced by Heterodera schachtii. May be involved in the development and function of syncytia.                                                                            | 63.28  | 664.82 | 0.10 | 6.81E-05 | 4.47E-04 |

|      |   |               |                 |           |                                                                                                                                                                                                                                                                                                                                                                                                         |         |         |        |          |          |
|------|---|---------------|-----------------|-----------|---------------------------------------------------------------------------------------------------------------------------------------------------------------------------------------------------------------------------------------------------------------------------------------------------------------------------------------------------------------------------------------------------------|---------|---------|--------|----------|----------|
| 2526 | 3 | F2-3 vs. L2-3 | 255014_at       | AT4G09960 | Encodes a MADS box transcription factor expressed in the carpel and ovules. Plays a maternal role in fertilization and seed development. Controls the structure and mechanical properties of the seed coat. Controls fruit size by regulating cytokinin levels and FRUITFULL.                                                                                                                           | 35.87   | 422.68  | 0.09   | < 1e-07  | < 1e-07  |
| 2527 | 3 | F2-3 vs. L2-3 | 253874_at       | AT4G27450 | aluminum induced protein with YGL and LRDR motifs;(source:Araport11)<br>Encodes a GASA domain containing protein that regulates increases in plant growth through GA-induced and DELLA-dependent signal transduction and that can increase abiotic stress resistance by reducing ROS accumulation.                                                                                                      | 43.82   | 545.71  | 0.08   | < 1e-07  | < 1e-07  |
| 2528 | 3 | F2-3 vs. L2-3 | 246550_at       | AT5G14920 |                                                                                                                                                                                                                                                                                                                                                                                                         | 44.19   | 577.26  | 0.08   | 3.80E-06 | 5.94E-05 |
| 2529 | 3 | F2-3 vs. L2-3 | 252321_at       | AT3G48510 | ABA#8208;induced transcription repressor that acts as feedback regulator in ABA signalling.                                                                                                                                                                                                                                                                                                             | 71.35   | 1004.16 | 0.07   | < 1e-07  | < 1e-07  |
| 2530 | 3 | F2-3 vs. L2-3 | 244971_at       | ATCG00670 | Encodes the only ClpP (caseinolytic protease) encoded within the plastid genome. Contains a highly conserved catalytic triad of Ser-type proteases (Ser-His-Asp). Part of the 350 kDa chloroplast Clp complex. The name reflects nomenclature described in Adam et. al (2001).<br>Belongs to the group of plant flotillins, which are plasma membrane proteins. Flot3 is found in membrane nanodomains. | 549.91  | 7769.24 | 0.07   | < 1e-07  | < 1e-07  |
| 2531 | 3 | F2-3 vs. L2-3 | 247208_at       | AT5G64870 |                                                                                                                                                                                                                                                                                                                                                                                                         | 62.04   | 1192.56 | 0.05   | < 1e-07  | < 1e-07  |
| 2532 | 3 | F2-3 vs. L2-3 | 257629_at       | AT3G26140 | Cellulase (glycosyl hydrolase family 5) protein;(source:Araport11)                                                                                                                                                                                                                                                                                                                                      | 50.43   | 1082.65 | 0.05   | 4.30E-06 | 6.44E-05 |
| 2533 | 3 | F2-3 vs. L2-3 | 257890_s_a      | AT3G42570 | peroxidase family protein;(source:Araport11)                                                                                                                                                                                                                                                                                                                                                            | 29.40   | 700.58  | 0.04   | 7.00E-07 | 1.83E-05 |
| 2534 | 3 | F2-3 vs. L2-3 | 256648_at       | AT3G13580 | Ribosomal protein L30/L7 family protein;(source:Araport11)                                                                                                                                                                                                                                                                                                                                              | 14.85   | 1396.97 | 0.01   | < 1e-07  | < 1e-07  |
| 2535 | 4 | F2-3 vs. M2-3 | 250606_s_a<br>t | AT5G07410 | Encodes a pectin methylesterase implicated in the remodeling of pectins in pollen. Its expression is restricted to the male gametophyte (dry pollen, imbibed pollen and pollen tube). Mutants do not display any phenotype in the vegetative tissues. Pollen germination of KO mutant is strongly delayed in vivo and in vitro. Extra calcium restores the wild type phenotype in vitro.                | 5737.01 | 9.23    | 621.32 | < 1e-07  | < 1e-07  |
| 2536 | 4 | F2-3 vs. M2-3 | 266750_s_a<br>t | AT2G47040 | Share high homologies with a group of pectin methylesterases (PME), pollen specific, and is required for enhancing the growth of pollen tube in style and transmitting tract tissues.                                                                                                                                                                                                                   | 7716.04 | 14.79   | 521.72 | < 1e-07  | < 1e-07  |
| 2537 | 4 | F2-3 vs. M2-3 | 246880_s_a<br>t | AT5G25980 | Myrosinase (thioglucoside glucosylhydrolase) gene involved in glucosinolate metabolism. The mRNA is cell-to-cell mobile.                                                                                                                                                                                                                                                                                | 8914.54 | 21.32   | 418.06 | < 1e-07  | < 1e-07  |
| 2538 | 4 | F2-3 vs. M2-3 | 256966_at       | AT3G13400 | SKU5 similar 13;(source:Araport11)                                                                                                                                                                                                                                                                                                                                                                      | 2870.82 | 16.95   | 169.37 | 5.00E-07 | 6.51E-05 |
| 2539 | 4 | F2-3 vs. M2-3 | 255515_at       | AT4G02250 | Plant invertase/pectin methylesterase inhibitor superfamily protein;(source:Araport11)                                                                                                                                                                                                                                                                                                                  | 1545.08 | 10.60   | 145.82 | 3.00E-07 | 4.88E-05 |
| 2540 | 4 | F2-3 vs. M2-3 | 246687_at       | AT5G33370 | GDSL-motif esterase/acyltransferase/lipase. Enzyme group with broad substrate specificity that may catalyze acyltransfer or hydrolase reactions with lipid and non-lipid substrates. Mutants are defective in cuticle formation with reduced sepal cuticle ridge formation.                                                                                                                             | 2352.70 | 19.78   | 118.97 | < 1e-07  | < 1e-07  |
| 2541 | 4 | F2-3 vs. M2-3 | 259269_at       | AT3G01270 | Pectate lyase family protein;(source:Araport11)                                                                                                                                                                                                                                                                                                                                                         | 2423.12 | 20.52   | 118.06 | < 1e-07  | < 1e-07  |
| 2542 | 4 | F2-3 vs. M2-3 | 251258_at       | AT3G62170 | VANGUARD-like protein;(source:Araport11)                                                                                                                                                                                                                                                                                                                                                                | 3054.47 | 26.97   | 113.24 | 1.00E-07 | 2.17E-05 |
| 2543 | 4 | F2-3 vs. M2-3 | 248227_at       | AT5G53820 | Late embryogenesis abundant protein (LEA) family protein;(source:Araport11)                                                                                                                                                                                                                                                                                                                             | 1220.54 | 11.78   | 103.63 | 3.00E-07 | 4.88E-05 |
| 2544 | 4 | F2-3 vs. M2-3 | 265127_at       | AT1G55560 | SKU5 similar 14;(source:Araport11)                                                                                                                                                                                                                                                                                                                                                                      | 1235.75 | 12.25   | 100.90 | 1.00E-07 | 2.17E-05 |
| 2545 | 4 | F2-3 vs. M2-3 | 252820_at       | AT3G42640 | H[+]-ATPase 8;(source:Araport11)                                                                                                                                                                                                                                                                                                                                                                        | 3179.09 | 38.79   | 81.97  | 1.00E-07 | 2.17E-05 |
| 2546 | 4 | F2-3 vs. M2-3 | 248926_at       | AT5G45880 | Pollen Ole e 1 allergen and extensin family protein;(source:Araport11)                                                                                                                                                                                                                                                                                                                                  | 1332.48 | 16.31   | 81.69  | < 1e-07  | < 1e-07  |
| 2547 | 4 | F2-3 vs. M2-3 | 251590_at       | AT3G57690 | Encodes a putative arabinogalactan-protein (AGP23).                                                                                                                                                                                                                                                                                                                                                     | 9925.07 | 131.86  | 75.27  | 4.00E-07 | 5.48E-05 |
| 2548 | 4 | F2-3 vs. M2-3 | 261943_at       | AT1G80660 | H[+]-ATPase 9;(source:Araport11)                                                                                                                                                                                                                                                                                                                                                                        | 812.70  | 11.66   | 69.69  | < 1e-07  | 2.17E-05 |
| 2549 | 4 | F2-3 vs. M2-3 | 245946_at       | AT5G19580 | glyoxal oxidase-related protein;(source:Araport11)                                                                                                                                                                                                                                                                                                                                                      | 1498.35 | 21.85   | 68.59  | 1.20E-06 | 1.14E-04 |
| 2550 | 4 | F2-3 vs. M2-3 | 248714_at       | AT5G48140 | Pectin lyase-like superfamily protein;(source:Araport11)                                                                                                                                                                                                                                                                                                                                                | 686.89  | 10.17   | 67.57  | 2.00E-07 | 3.72E-05 |
| 2551 | 4 | F2-3 vs. M2-3 | 265552_at       | AT2G07560 | H[+]-ATPase 6;(source:Araport11)                                                                                                                                                                                                                                                                                                                                                                        | 819.78  | 12.23   | 67.04  | < 1e-07  | < 1e-07  |
| 2552 | 4 | F2-3 vs. M2-3 | 245010_at       | ATCG00420 | Encodes NADH dehydrogenase subunit J. Its transcription is increased upon sulfur depletion.                                                                                                                                                                                                                                                                                                             | 7175.90 | 114.05  | 62.92  | 8.00E-07 | 9.26E-05 |
| 2553 | 4 | F2-3 vs. M2-3 | 253226_at       | AT4G35010 | putative beta-galactosidase (BGAL11 gene)                                                                                                                                                                                                                                                                                                                                                               | 652.31  | 11.46   | 56.93  | < 1e-07  | < 1e-07  |
| 2554 | 4 | F2-3 vs. M2-3 | 265080_at       | AT1G55570 | SKU5 similar 12;(source:Araport11)                                                                                                                                                                                                                                                                                                                                                                      | 626.28  | 12.29   | 50.96  | 2.00E-07 | 3.72E-05 |

|      |   |               |            |           |                                                                                                                                                                                                                                                                                                                                                                                                                                                                                                                                                                                                                                                                                                                                    |         |        |       |          |          |
|------|---|---------------|------------|-----------|------------------------------------------------------------------------------------------------------------------------------------------------------------------------------------------------------------------------------------------------------------------------------------------------------------------------------------------------------------------------------------------------------------------------------------------------------------------------------------------------------------------------------------------------------------------------------------------------------------------------------------------------------------------------------------------------------------------------------------|---------|--------|-------|----------|----------|
| 2555 | 4 | F2-3 vs. M2-3 | 251733_at  | AT3G56240 | CCH protein belongs to a family of eukaryotic proteins that participate in intracellular copper homeostasis by delivering this metal to the secretory pathway; mainly located along the vascular bundles of senescing leaves and petioles as well as in stem sieve elements; hypothesized to have a role in copper mobilization from decaying organs towards reproductive structures, as a result of metalloprotein breakdown. The plant-specific C-terminal domain of the CCH protein forms amyloid-like fibrils in vitro.                                                                                                                                                                                                        | 1361.88 | 29.11  | 46.79 | 4.00E-07 | 5.48E-05 |
| 2556 | 4 | F2-3 vs. M2-3 | 248367_at  | AT5G52360 | ADF10 is an actin-depolymerizing factor that preferentially binds ADP-G-actin and inhibits G-actin nucleotide exchange. ADF10 promotes actin turnover in pollen, regulating organization of actin filaments and vesicle trafficking during pollen tube growth.                                                                                                                                                                                                                                                                                                                                                                                                                                                                     | 775.69  | 19.55  | 39.69 | 4.00E-07 | 5.48E-05 |
| 2557 | 4 | F2-3 vs. M2-3 | 260888_at  | AT1G29140 | Pollen Ole e 1 allergen and extensin family protein;(source:Araport11)                                                                                                                                                                                                                                                                                                                                                                                                                                                                                                                                                                                                                                                             | 426.02  | 13.43  | 31.71 | 1.10E-06 | 1.08E-04 |
| 2558 | 4 | F2-3 vs. M2-3 | 246072_at  | AT5G20240 | Floral homeotic gene encoding a MADS domain transcription factor. Required for the specification of petal and stamen identities.                                                                                                                                                                                                                                                                                                                                                                                                                                                                                                                                                                                                   | 525.58  | 16.76  | 31.36 | 2.00E-07 | 3.72E-05 |
| 2559 | 4 | F2-3 vs. M2-3 | 266743_at  | AT2G02990 | Encodes a member of the ribonuclease T2 family that responds to inorganic phosphate starvation, and inhibits production of anthocyanin. Also involved in wound-induced signaling independent of jasmonic acid. Its expression is responsive to both phosphate (Pi) and phosphite (Phi) in roots.                                                                                                                                                                                                                                                                                                                                                                                                                                   | 964.31  | 31.65  | 30.47 | 7.70E-06 | 3.29E-04 |
| 2560 | 4 | F2-3 vs. M2-3 | 256955_at  | AT3G13390 | SKU5 similar 11;(source:Araport11)<br>Encodes a putative pectin methylesterase/invertase inhibitor. Anti-sense reduction of this gene's transcript results in pollen tube growth retardation and then partial male sterility and reduced seed set.                                                                                                                                                                                                                                                                                                                                                                                                                                                                                 | 464.22  | 15.93  | 29.14 | 5.80E-06 | 2.82E-04 |
| 2561 | 4 | F2-3 vs. M2-3 | 262760_at  | AT1G10770 | Pectin lyase-like superfamily protein;(source:Araport11)                                                                                                                                                                                                                                                                                                                                                                                                                                                                                                                                                                                                                                                                           | 494.95  | 17.50  | 28.29 | 2.30E-06 | 1.62E-04 |
| 2562 | 4 | F2-3 vs. M2-3 | 258639_at  | AT3G07820 |                                                                                                                                                                                                                                                                                                                                                                                                                                                                                                                                                                                                                                                                                                                                    | 243.11  | 9.36   | 25.98 | < 1e-07  | 2.17E-05 |
| 2563 | 4 | F2-3 vs. M2-3 | 251304_at  | AT3G61990 | Encodes a protein methyltransferase. Involved in the methylation of plant transmembrane proteins.                                                                                                                                                                                                                                                                                                                                                                                                                                                                                                                                                                                                                                  | 510.37  | 21.38  | 23.88 | 2.90E-06 | 1.91E-04 |
| 2564 | 4 | F2-3 vs. M2-3 | 257173_at  | AT3G23810 | S-adenosyl-L-homocysteine (SAH) hydrolase 2;(source:Araport11)                                                                                                                                                                                                                                                                                                                                                                                                                                                                                                                                                                                                                                                                     | 4626.75 | 194.32 | 23.81 | 1.46E-05 | 5.10E-04 |
| 2565 | 4 | F2-3 vs. M2-3 | 254104_at  | AT4G25040 | Uncharacterized protein family (UPF0497);(source:Araport11)                                                                                                                                                                                                                                                                                                                                                                                                                                                                                                                                                                                                                                                                        | 616.86  | 26.16  | 23.58 | < 1e-07  | < 1e-07  |
| 2566 | 4 | F2-3 vs. M2-3 | 245842_at  | AT1G58430 | Encodes an anther-specific proline-rich protein.<br>Encodes a cis-cinnamic acid responsive gene that is a member of the major latex protein-like gene family and plays a role in promoting vegetative growth and delaying flowering. The mRNA is cell-to-cell mobile.                                                                                                                                                                                                                                                                                                                                                                                                                                                              | 323.61  | 13.77  | 23.51 | 6.00E-07 | 7.44E-05 |
| 2567 | 4 | F2-3 vs. M2-3 | 266353_at  | AT2G01520 | Late embryogenesis abundant protein (LEA) family protein;(source:Araport11)                                                                                                                                                                                                                                                                                                                                                                                                                                                                                                                                                                                                                                                        | 2556.56 | 112.64 | 22.70 | 1.40E-06 | 1.22E-04 |
| 2568 | 4 | F2-3 vs. M2-3 | 254716_at  | AT4G13560 | serine carboxypeptidase-like 48;(source:Araport11)                                                                                                                                                                                                                                                                                                                                                                                                                                                                                                                                                                                                                                                                                 | 631.25  | 27.81  | 22.70 | 5.00E-07 | 6.51E-05 |
| 2569 | 4 | F2-3 vs. M2-3 | 252606_at  | AT3G45010 | Ribosomal protein L30/L7 family protein;(source:Araport11)                                                                                                                                                                                                                                                                                                                                                                                                                                                                                                                                                                                                                                                                         | 622.45  | 27.54  | 22.60 | 1.85E-05 | 6.16E-04 |
| 2570 | 4 | F2-3 vs. M2-3 | 267213_at  | AT2G44120 | NOD26-like intrinsic protein 4;(source:Araport11)                                                                                                                                                                                                                                                                                                                                                                                                                                                                                                                                                                                                                                                                                  | 358.00  | 15.96  | 22.44 | 3.20E-06 | 2.06E-04 |
| 2571 | 4 | F2-3 vs. M2-3 | 249584_s_a | AT5G37810 | Sucrose transporter, expressed in pollen tubes.                                                                                                                                                                                                                                                                                                                                                                                                                                                                                                                                                                                                                                                                                    | 214.36  | 9.84   | 21.79 | 1.40E-06 | 1.22E-04 |
| 2572 | 4 | F2-3 vs. M2-3 | 262463_at  | AT1G50310 |                                                                                                                                                                                                                                                                                                                                                                                                                                                                                                                                                                                                                                                                                                                                    | 347.34  | 16.24  | 21.39 | 6.90E-06 | 3.02E-04 |
| 2573 | 4 | F2-3 vs. M2-3 | 259161_at  | AT3G01500 | Encodes a putative beta-carbonic anhydrase betaCA1. Together with betaCA4 (At1g70410) regulates CO2-controlled stomatal movements in guard cells, as well as attenuates immunity. Differential CA gene expression in response to changing atmospheric CO2 conditions contribute to altered disease resistance levels. Activated by OXS2 under the treatment of salt.                                                                                                                                                                                                                                                                                                                                                               | 380.65  | 18.38  | 20.72 | 1.90E-06 | 1.48E-04 |
| 2574 | 4 | F2-3 vs. M2-3 | 258003_at  | AT3G29030 | Encodes an expansin. Naming convention from the Expansin Working Group (Kende et al, 2004. Plant Mol Bio)                                                                                                                                                                                                                                                                                                                                                                                                                                                                                                                                                                                                                          | 397.73  | 19.39  | 20.51 | < 1e-07  | < 1e-07  |
| 2575 | 4 | F2-3 vs. M2-3 | 258686_at  | AT3G07840 | Pectin lyase-like superfamily protein;(source:Araport11)                                                                                                                                                                                                                                                                                                                                                                                                                                                                                                                                                                                                                                                                           | 552.39  | 26.95  | 20.50 | 5.40E-06 | 2.78E-04 |
| 2576 | 4 | F2-3 vs. M2-3 | 248252_at  | AT5G53250 | arabinogalactan protein 22;(source:Araport11)                                                                                                                                                                                                                                                                                                                                                                                                                                                                                                                                                                                                                                                                                      | 1087.93 | 53.66  | 20.27 | 1.31E-04 | 1.88E-03 |
| 2577 | 4 | F2-3 vs. M2-3 | 252607_at  | AT3G44990 | Encodes a xyloglucan endotransglycosylase/hydrolase. Protein sequence and phylogenetic analysis indicates that this enzyme resides in Group III-A of the XTH family, with high similarity to Tropaeolum majus (nasturtium) xyloglucanase 1 (TmNXG1). Enzyme kinetic analysis indicates predominant xyloglucan endo-hydrolase activity (EC 3.2.1.151) with only limited potential to act as a xyloglucan endo-transglycosylase (EC 2.4.1.207). Encodes a member of the Arabidopsis LIM proteins: a family of actin bundlers with distinct expression patterns. WLIM1, WLIM2a, and WLIM2b are widely expressed, whereas PLIM2a, PLIM2b, and PLIM2c are predominantly expressed in pollen. Regulates actin cytoskeleton organization. | 200.56  | 10.20  | 19.65 | 1.80E-06 | 1.42E-04 |
| 2578 | 4 | F2-3 vs. M2-3 | 266918_at  | AT2G45800 | Pectate lyase family protein;(source:Araport11)                                                                                                                                                                                                                                                                                                                                                                                                                                                                                                                                                                                                                                                                                    | 256.04  | 13.43  | 19.06 | 1.00E-06 | 1.06E-04 |
| 2579 | 4 | F2-3 vs. M2-3 | 246545_at  | AT5G15110 |                                                                                                                                                                                                                                                                                                                                                                                                                                                                                                                                                                                                                                                                                                                                    | 207.74  | 11.18  | 18.59 | 3.00E-07 | 4.88E-05 |

|      |   |               |             |           |                                                                                                                                                                                                                                                                                                                                                                                                                                                                                                                                                                                                    |         |        |       |          |          |
|------|---|---------------|-------------|-----------|----------------------------------------------------------------------------------------------------------------------------------------------------------------------------------------------------------------------------------------------------------------------------------------------------------------------------------------------------------------------------------------------------------------------------------------------------------------------------------------------------------------------------------------------------------------------------------------------------|---------|--------|-------|----------|----------|
| 2580 | 4 | F2-3 vs. M2-3 | 249614_at   | AT5G37300 | Encodes a bifunctional enzyme, wax ester synthase (WS) and diacylglycerol acyltransferase (DGAT). In vitro assay indicated a ratio of 10.9 between its WS and DGAT activities. Both mutant                                                                                                                                                                                                                                                                                                                                                                                                         | 233.55  | 12.61  | 18.52 | 3.50E-06 | 2.20E-04 |
| 2581 | 4 | F2-3 vs. M2-3 | 250631_at   | AT5G07430 | and in vivo expression/analysis in yeast studies indicated a role in wax biosynthesis.                                                                                                                                                                                                                                                                                                                                                                                                                                                                                                             | 195.35  | 11.02  | 17.73 | 2.00E-07 | 3.72E-05 |
| 2582 | 4 | F2-3 vs. M2-3 | 249375_at   | AT5G40730 | Pectin lyase-like superfamily protein;(source:Araport11)<br>Encodes an arabinogalactan-protein (AGP24).                                                                                                                                                                                                                                                                                                                                                                                                                                                                                            | 1324.88 | 76.88  | 17.23 | 1.94E-04 | 2.36E-03 |
| 2583 | 4 | F2-3 vs. M2-3 | 251775_s_at | AT3G55610 | encodes delta 1-pyrroline-5-carboxylate synthetase B. Gene expression is induced by dehydration, high salt and ABA. Knock-out mutations in P5CS2 are embryo-lethal. P5CS2 appears to be present in different cells and/or different subcellular locations from P5CS1 in a tissue-dependent manner. Mutants are defective in pollen development.                                                                                                                                                                                                                                                    | 834.52  | 48.78  | 17.11 | 2.19E-05 | 6.79E-04 |
| 2584 | 4 | F2-3 vs. M2-3 | 252140_at   | AT3G51070 | S-adenosyl-L-methionine-dependent methyltransferases superfamily protein;(source:Araport11)                                                                                                                                                                                                                                                                                                                                                                                                                                                                                                        | 208.13  | 12.19  | 17.07 | 1.20E-06 | 1.14E-04 |
| 2585 | 4 | F2-3 vs. M2-3 | 256638_at   | AT3G19090 | RNA-binding protein;(source:Araport11)                                                                                                                                                                                                                                                                                                                                                                                                                                                                                                                                                             | 739.58  | 47.04  | 15.72 | 2.50E-06 | 1.69E-04 |
| 2586 | 4 | F2-3 vs. M2-3 | 261266_at   | AT1G26770 | Encodes an expansin. Naming convention from the Expansin Working Group (Kende et al, Plant Mol Bio). Involved in the formation of nematode-induced syncytia in roots of Arabidopsis thaliana.                                                                                                                                                                                                                                                                                                                                                                                                      | 226.92  | 14.74  | 15.40 | 2.10E-05 | 6.59E-04 |
| 2587 | 4 | F2-3 vs. M2-3 | 261970_at   | AT1G65960 | glutamate decarboxylase (GAD2)The mRNA is cell-to-cell mobile.                                                                                                                                                                                                                                                                                                                                                                                                                                                                                                                                     | 2324.83 | 152.61 | 15.23 | 1.40E-06 | 1.22E-04 |
| 2588 | 4 | F2-3 vs. M2-3 | 265768_at   | AT2G48020 | Encodes a zinc transporter ZIF2. Expression of ZIF2 is regulated by alternative splicing.                                                                                                                                                                                                                                                                                                                                                                                                                                                                                                          | 1326.82 | 90.52  | 14.66 | < 1e-07  | 2.17E-05 |
| 2589 | 4 | F2-3 vs. M2-3 | 252863_at   | AT4G39800 | ** Referred to as MIPS2 in Mitsuhashi et al 2008. myo-inositol-1-phosphate synthase isoform 1.Expressed in leaf, root and silique. Immunolocalization experiments with an antibody recognizing MIPS1, MIPS2, and MIPS3 showed endosperm localization.                                                                                                                                                                                                                                                                                                                                              | 795.03  | 54.56  | 14.57 | 1.10E-04 | 1.70E-03 |
| 2590 | 4 | F2-3 vs. M2-3 | 247902_at   | AT5G57350 | member of Plasma membrane H <sup>+</sup> -ATPase family<br>Encodes flavanone 3-hydroxylase that is coordinately expressed with chalcone synthase and chalcone isomerases. Regulates flavonoid biosynthesis. Not responsive to auxin or ethylene stimulus (qRT-PCR).                                                                                                                                                                                                                                                                                                                                | 399.01  | 28.08  | 14.21 | 1.85E-04 | 2.30E-03 |
| 2591 | 4 | F2-3 vs. M2-3 | 252123_at   | AT3G51240 |                                                                                                                                                                                                                                                                                                                                                                                                                                                                                                                                                                                                    | 562.77  | 40.26  | 13.98 | 2.88E-05 | 7.94E-04 |
| 2592 | 4 | F2-3 vs. M2-3 | 253083_at   | AT4G36250 | Encodes a putative aldehyde dehydrogenase. The gene is not responsive to osmotic stress and is expressed constitutively at a low level in plantlets and root cultures.                                                                                                                                                                                                                                                                                                                                                                                                                             | 466.83  | 34.28  | 13.62 | 1.60E-06 | 1.30E-04 |
| 2593 | 4 | F2-3 vs. M2-3 | 255016_at   | AT4G10120 | Encodes a protein with putative sucrose-phosphate synthase activity.                                                                                                                                                                                                                                                                                                                                                                                                                                                                                                                               | 133.95  | 9.95   | 13.47 | 8.00E-07 | 9.26E-05 |
| 2594 | 4 | F2-3 vs. M2-3 | 249939_at   | AT5G22430 | Pollen Ole e 1 allergen and extensin family protein;(source:Araport11)                                                                                                                                                                                                                                                                                                                                                                                                                                                                                                                             | 296.77  | 22.35  | 13.28 | 5.37E-05 | 1.14E-03 |
| 2595 | 4 | F2-3 vs. M2-3 | 245232_at   | AT4G25590 | actin depolymerizing factor 7;(source:Araport11)                                                                                                                                                                                                                                                                                                                                                                                                                                                                                                                                                   | 178.24  | 13.64  | 13.07 | 4.00E-07 | 5.48E-05 |
| 2596 | 4 | F2-3 vs. M2-3 | 258751_at   | AT3G05890 | Low temperature and salt responsive protein family;(source:Araport11)                                                                                                                                                                                                                                                                                                                                                                                                                                                                                                                              | 168.98  | 12.98  | 13.02 | 5.36E-05 | 1.14E-03 |
| 2597 | 4 | F2-3 vs. M2-3 | 247538_at   | AT5G61700 | ABC2 homolog 16;(source:Araport11)                                                                                                                                                                                                                                                                                                                                                                                                                                                                                                                                                                 | 250.74  | 19.48  | 12.87 | 6.50E-06 | 2.99E-04 |
| 2598 | 4 | F2-3 vs. M2-3 | 262717_s_at | AT1G16410 | member of CYP79F The mRNA is cell-to-cell mobile.                                                                                                                                                                                                                                                                                                                                                                                                                                                                                                                                                  | 143.94  | 11.23  | 12.81 | 4.00E-07 | 5.48E-05 |
| 2599 | 4 | F2-3 vs. M2-3 | 258591_at   | AT3G04360 | Calcium-dependent lipid-binding (CaLB domain) family protein;(source:Araport11)                                                                                                                                                                                                                                                                                                                                                                                                                                                                                                                    | 229.97  | 18.08  | 12.72 | 3.00E-06 | 1.95E-04 |
| 2600 | 4 | F2-3 vs. M2-3 | 253725_at   | AT4G29340 | Profilin is a low-molecular weight, actin monomer-binding protein that regulates the organization of actin cytoskeleton in eukaryotes, including higher plants. PRF4 and PRF5 are late pollen-specific and are not detectable in other cell types of the plant body including microspores and root hairs. Immunocytochemical studies at the subcellular level reveal that both the constitutive and pollen-specific profilins are abundant in the cytoplasm. In vegetative cell types, such as root apical cells, profilins showed localization to nuclei in addition to the cytoplasmic staining. | 319.33  | 25.14  | 12.70 | < 1e-07  | 2.17E-05 |
| 2601 | 4 | F2-3 vs. M2-3 | 258158_at   | AT3G17790 | Expression is upregulated in the shoot of cax1/cax3 mutant and is responsive to phosphate (Pi) and not phosphite (Phi) in roots and shoots.                                                                                                                                                                                                                                                                                                                                                                                                                                                        | 235.19  | 18.56  | 12.67 | 1.12E-05 | 4.26E-04 |
| 2602 | 4 | F2-3 vs. M2-3 | 250349_at   | AT5G12000 | kinase with adenine nucleotide alpha hydrolases-like domain-containing protein;(source:Araport11)                                                                                                                                                                                                                                                                                                                                                                                                                                                                                                  | 165.88  | 13.12  | 12.64 | 1.00E-06 | 1.06E-04 |
| 2603 | 4 | F2-3 vs. M2-3 | 265547_at   | AT2G28305 | Putative lysine decarboxylase family protein;(source:Araport11)                                                                                                                                                                                                                                                                                                                                                                                                                                                                                                                                    | 349.95  | 27.95  | 12.52 | 1.07E-04 | 1.68E-03 |
| 2604 | 4 | F2-3 vs. M2-3 | 245011_at   | ATCG00430 | Encodes a protein which was originally thought to be part of photosystem II but its wheat homolog was later shown to encode for subunit K of NADH dehydrogenase.                                                                                                                                                                                                                                                                                                                                                                                                                                   | 405.07  | 32.49  | 12.47 | 5.50E-06 | 2.81E-04 |
| 2605 | 4 | F2-3 vs. M2-3 | 263450_at   | AT2G31500 | member of Calcium Dependent Protein Kinase                                                                                                                                                                                                                                                                                                                                                                                                                                                                                                                                                         | 129.20  | 10.44  | 12.37 | 2.49E-05 | 7.09E-04 |

|      |   |               |           |           |                                                                                                                                                                                                                                                                                                                                                                                                                                                                                 |         |       |       |          |          |
|------|---|---------------|-----------|-----------|---------------------------------------------------------------------------------------------------------------------------------------------------------------------------------------------------------------------------------------------------------------------------------------------------------------------------------------------------------------------------------------------------------------------------------------------------------------------------------|---------|-------|-------|----------|----------|
|      |   |               |           |           | Related to Cys2/His2-type zinc-finger proteins found in higher plants. Compensated for a subset of calcineurin deficiency in yeast. Salt tolerance produced by ZAT10 appeared to be partially dependent on ENA1/PMR2, a P-type ATPase required for Li <sup>+</sup> and Na <sup>+</sup> efflux in yeast. The protein is localized to the nucleus, acts as a transcriptional repressor and is responsive to chitin oligomers. Also involved in response to photooxidative stress. |         |       |       |          |          |
| 2606 | 4 | F2-3 vs. M2-3 | 261648_at | AT1G27730 | Encodes glutathione transferase belonging to the phi class of GSTs. Naming convention according to Wagner et al. (2002).                                                                                                                                                                                                                                                                                                                                                        | 310.78  | 25.20 | 12.33 | 1.23E-04 | 1.82E-03 |
| 2607 | 4 | F2-3 vs. M2-3 | 258851_at | AT3G03190 | Fe-superoxide dismutase                                                                                                                                                                                                                                                                                                                                                                                                                                                         | 318.07  | 25.90 | 12.28 | 9.00E-06 | 3.69E-04 |
| 2608 | 4 | F2-3 vs. M2-3 | 254098_at | AT4G25100 |                                                                                                                                                                                                                                                                                                                                                                                                                                                                                 | 1218.52 | 99.62 | 12.23 | 5.02E-04 | 4.10E-03 |
| 2609 | 4 | F2-3 vs. M2-3 | 252377_at | AT3G47960 | Encodes a high-affinity, proton-dependent glucosinolate-specific transporter that is crucial for the transport of both methionine- and tryptophan-derived glucosinolates to seeds.                                                                                                                                                                                                                                                                                              | 402.40  | 33.95 | 11.85 | 1.40E-06 | 1.22E-04 |
| 2610 | 4 | F2-3 vs. M2-3 | 264208_at | AT1G22760 | Putative poly(A) binding protein May there fore function in posttranscriptional regulation, including mRNA turnover and translational initiation. Expression detected only in floral organs.                                                                                                                                                                                                                                                                                    | 204.29  | 17.28 | 11.82 | < 1e-07  | < 1e-07  |
| 2611 | 4 | F2-3 vs. M2-3 | 252733_at | AT3G43120 | SAUR-like auxin-responsive protein family;(source:Araport11)<br>Floral homeotic gene encoding a MADS domain protein homologous to SRF transcription factors. Specifies floral meristem and sepal identity. Required for the transcriptional activation of AGAMOUS. Interacts with LEAFY.Binds to promoter and regulates the expression of flowering time genes SVP, SOC1 and AGL24.                                                                                             | 119.86  | 10.16 | 11.80 | 5.80E-06 | 2.82E-04 |
| 2612 | 4 | F2-3 vs. M2-3 | 259372_at | AT1G69120 |                                                                                                                                                                                                                                                                                                                                                                                                                                                                                 | 125.32  | 10.69 | 11.72 | 3.00E-07 | 4.88E-05 |
| 2613 | 4 | F2-3 vs. M2-3 | 267144_at | AT2G38110 | bifunctional sn-glycerol-3-phosphate 2-O-acyltransferase/phosphatase. Involved in cutin assembly.                                                                                                                                                                                                                                                                                                                                                                               | 262.08  | 23.32 | 11.24 | 2.83E-04 | 3.01E-03 |
| 2614 | 4 | F2-3 vs. M2-3 | 266115_at | AT2G02140 | Predicted to encode a PR (pathogenesis-related) protein. Belongs to the plant defensin (PDF) family with the following members: At1g75830/PDF1.1, At5g44420/PDF1.2a, At2g26020/PDF1.2b, At5g44430/PDF1.2c, At2g26010/PDF1.3, At1g19610/PDF1.4, At1g55010/PDF1.5, At2g02120/PDF2.1, At2g02100/PDF2.2, At2g02130/PDF2.3, At1g61070/PDF2.4, At5g63660/PDF2.5, At2g02140/PDF2.6, At5g38330/PDF3.1 and At4g30070/PDF3.2.                                                             | 216.49  | 19.38 | 11.17 | 1.62E-05 | 5.55E-04 |
| 2615 | 4 | F2-3 vs. M2-3 | 267476_at | AT2G02720 | Pectate lyase family protein;(source:Araport11)                                                                                                                                                                                                                                                                                                                                                                                                                                 | 186.23  | 16.72 | 11.14 | 3.04E-05 | 8.25E-04 |
| 2616 | 4 | F2-3 vs. M2-3 | 266697_at | AT2G19770 | Encodes profilin 5, originally named profilin 4 (PRO4/PFN4). Low-molecular weight, actin monomer-binding protein that regulates the organization of actin cytoskeleton. Pollen-specific plant profilin present predominantly in mature pollen and growing pollen tubes.                                                                                                                                                                                                         | 202.21  | 18.15 | 11.14 | 9.38E-05 | 1.54E-03 |
| 2617 | 4 | F2-3 vs. M2-3 | 247162_at | AT5G65730 | xyloglucan endotransglucosylase/hydrolase 6;(source:Araport11)                                                                                                                                                                                                                                                                                                                                                                                                                  | 136.75  | 12.32 | 11.10 | 2.50E-06 | 1.69E-04 |
| 2618 | 4 | F2-3 vs. M2-3 | 245701_at | AT5G04140 | Encodes a gene whose sequence is similar to ferredoxin dependent glutamate synthase (Fd-GOGAT). Expression in leaves is induced by light and sucrose. Proposed to be involved in photorespiration and nitrogen assimilation. The mRNA is cell-to-cell mobile.                                                                                                                                                                                                                   | 252.82  | 23.17 | 10.91 | 3.62E-05 | 9.26E-04 |
| 2619 | 4 | F2-3 vs. M2-3 | 245749_at | AT1G51090 | Heavy metal associated domain containing protein involved in plant immunity.Mutants show an increase in root length under NO stress and reduction in root length under H2O2 stress conditions. Mutants show increases in defense responses to pathogens including hypersensitive lesions, increased resistance and induction of SAR genes.                                                                                                                                      | 168.81  | 16.09 | 10.49 | 1.00E-07 | 2.17E-05 |
| 2620 | 4 | F2-3 vs. M2-3 | 260997_at | AT1G26610 | C2H2-like zinc finger protein;(source:Araport11)<br>Encodes a member of a gene family homologous to mammalian SNAP25, a type of SNARE proteins with two chains. There are three members in Arabidopsis: SNAP30, SNAP29, and SNAP33.                                                                                                                                                                                                                                             | 507.50  | 49.13 | 10.33 | 1.17E-04 | 1.76E-03 |
| 2621 | 4 | F2-3 vs. M2-3 | 259451_at | AT1G13890 | Rubisco activase, a nuclear-encoded chloroplast protein that consists of two isoforms arising from alternative splicing in most plants. Required for the light activation of rubisco. Involved in jasmonate-induced leaf senescence.                                                                                                                                                                                                                                            | 100.74  | 9.77  | 10.31 | 7.17E-05 | 1.33E-03 |
| 2622 | 4 | F2-3 vs. M2-3 | 245061_at | AT2G39730 |                                                                                                                                                                                                                                                                                                                                                                                                                                                                                 | 675.54  | 65.64 | 10.29 | 9.50E-05 | 1.55E-03 |
| 2623 | 4 | F2-3 vs. M2-3 | 249996_at | AT5G18600 | Encodes a member of the CC-type glutaredoxin (ROXY) family that has been shown to interact with the transcription factor TGA2 and suppress ORA59 promoter activity.<br>encodes a microbody NAD-dependent malate dehydrogenase encodes an peroxisomal NAD-malate dehydrogenase that is involved in fatty acid beta-oxidation through providing NAD to the process of converting fatty acyl CoA to acetyl CoA.                                                                    | 224.51  | 22.15 | 10.14 | 2.89E-04 | 3.03E-03 |
| 2624 | 4 | F2-3 vs. M2-3 | 250498_at | AT5G09660 |                                                                                                                                                                                                                                                                                                                                                                                                                                                                                 | 352.14  | 34.81 | 10.11 | 3.90E-06 | 2.31E-04 |



|      |   |               |             |           |                                                                                                                                                                                                                                                                                                                                                                                                                                                                                                                                                            |         |        |       |          |          |
|------|---|---------------|-------------|-----------|------------------------------------------------------------------------------------------------------------------------------------------------------------------------------------------------------------------------------------------------------------------------------------------------------------------------------------------------------------------------------------------------------------------------------------------------------------------------------------------------------------------------------------------------------------|---------|--------|-------|----------|----------|
| 2625 | 4 | F2-3 vs. M2-3 | 252291_s_at | AT3G49110 | Class III peroxidase Perx33. Expressed in roots. Located in the cell wall. Involved in cell elongation. Expression activated by light. May play a role in generating H2O2 during defense response. The mRNA is cell-to-cell mobile.                                                                                                                                                                                                                                                                                                                        | 116.67  | 11.63  | 10.04 | 1.03E-04 | 1.65E-03 |
| 2626 | 4 | F2-3 vs. M2-3 | 250514_at   | AT5G09550 | GDP dissociation inhibitor family protein / Rab GTPase activator family protein;(source:Araport11)                                                                                                                                                                                                                                                                                                                                                                                                                                                         | 139.97  | 13.96  | 10.03 | 4.20E-06 | 2.40E-04 |
| 2627 | 4 | F2-3 vs. M2-3 | 251916_at   | AT3G53960 | Major facilitator superfamily protein;(source:Araport11)<br>Encodes SMALLER WITH VARIABLE BRANCHES (SVB), a protein with a conserved domain of unknown function (DUF538). The trichomes of the SVB mutants are smaller and exhibit branches of variable length and number.                                                                                                                                                                                                                                                                                 | 239.96  | 24.11  | 9.95  | 2.82E-05 | 7.85E-04 |
| 2628 | 4 | F2-3 vs. M2-3 | 245629_at   | AT1G56580 | beta-hexosaminidase (DUF1336);(source:Araport11)                                                                                                                                                                                                                                                                                                                                                                                                                                                                                                           | 331.64  | 33.42  | 9.92  | 7.68E-05 | 1.36E-03 |
| 2629 | 4 | F2-3 vs. M2-3 | 262664_at   | AT1G13970 | Encodes a hexose sugar transporter that is expressed in pollen. STP6 may play a role in providing sugars during late pollen maturation or pollen tube germination.                                                                                                                                                                                                                                                                                                                                                                                         | 231.87  | 23.55  | 9.85  | 7.92E-05 | 1.39E-03 |
| 2630 | 4 | F2-3 vs. M2-3 | 258561_at   | AT3G05960 | Chloroplast lipooxygenase required for wound-induced jasmonic acid accumulation in Arabidopsis. Mutants are resistant to Staphylococcus aureus and accumulate salicylic acid upon infection. CFA-Leu, CFA-Val, CFA-Met and CFA-Ala can induce the expression of LOX2. The mRNA is cell-to-cell mobile.                                                                                                                                                                                                                                                     | 128.51  | 13.42  | 9.57  | 5.07E-05 | 1.13E-03 |
| 2631 | 4 | F2-3 vs. M2-3 | 252618_at   | AT3G45140 | Monomeric G protein. Expressed in root epidermal cells that are destined to become atrichoblasts. Also expressed during pollen development and in the pollen tube tip.                                                                                                                                                                                                                                                                                                                                                                                     | 578.39  | 60.43  | 9.57  | 3.71E-05 | 9.26E-04 |
| 2632 | 4 | F2-3 vs. M2-3 | 257951_at   | AT3G21700 | Protein kinase superfamily protein;(source:Araport11)                                                                                                                                                                                                                                                                                                                                                                                                                                                                                                      | 192.77  | 20.26  | 9.51  | 5.20E-06 | 2.71E-04 |
| 2633 | 4 | F2-3 vs. M2-3 | 251358_at   | AT3G61160 | responsive to dehydration 22 (RD22) mediated by ABA                                                                                                                                                                                                                                                                                                                                                                                                                                                                                                        | 188.33  | 19.85  | 9.49  | 3.41E-05 | 8.97E-04 |
| 2634 | 4 | F2-3 vs. M2-3 | 246908_at   | AT5G25610 | kinase with adenine nucleotide alpha hydrolases-like domain-containing protein;(source:Araport11)                                                                                                                                                                                                                                                                                                                                                                                                                                                          | 2057.19 | 218.35 | 9.42  | 8.73E-05 | 1.46E-03 |
| 2635 | 4 | F2-3 vs. M2-3 | 264139_at   | AT1G78940 | encodes a gene similar to cellulose synthase                                                                                                                                                                                                                                                                                                                                                                                                                                                                                                               | 124.44  | 13.57  | 9.17  | 4.31E-05 | 1.02E-03 |
| 2636 | 4 | F2-3 vs. M2-3 | 245465_at   | AT4G16590 | SKU5-similar 6;(source:Araport11)                                                                                                                                                                                                                                                                                                                                                                                                                                                                                                                          | 188.55  | 20.59  | 9.16  | 4.43E-05 | 1.04E-03 |
| 2637 | 4 | F2-3 vs. M2-3 | 261363_at   | AT1G41830 | hypothetical protein;(source:Araport11)                                                                                                                                                                                                                                                                                                                                                                                                                                                                                                                    | 250.30  | 27.43  | 9.12  | 8.40E-06 | 3.50E-04 |
| 2638 | 4 | F2-3 vs. M2-3 | 244959_s_at | AT2G07708 | Protein is tyrosine-phosphorylated and its phosphorylation state is modulated in response to ABA in Arabidopsis thaliana seeds.                                                                                                                                                                                                                                                                                                                                                                                                                            | 1798.49 | 202.96 | 8.86  | 2.73E-04 | 2.96E-03 |
| 2639 | 4 | F2-3 vs. M2-3 | 252929_at   | AT4G38970 | hypothetical protein;(source:Araport11)                                                                                                                                                                                                                                                                                                                                                                                                                                                                                                                    | 2617.69 | 298.20 | 8.78  | 2.25E-05 | 6.85E-04 |
| 2640 | 4 | F2-3 vs. M2-3 | 267443_at   | AT2G19000 | NPF3.1 is a membrane localized GA transporter that is expressed in the root endodermis.                                                                                                                                                                                                                                                                                                                                                                                                                                                                    | 101.61  | 11.63  | 8.74  | 1.20E-05 | 4.43E-04 |
| 2641 | 4 | F2-3 vs. M2-3 | 262281_at   | AT1G68570 | Plant invertase/pectin methylesterase inhibitor superfamily protein;(source:Araport11)                                                                                                                                                                                                                                                                                                                                                                                                                                                                     | 154.91  | 17.78  | 8.71  | 1.50E-06 | 1.24E-04 |
| 2642 | 4 | F2-3 vs. M2-3 | 266764_at   | AT2G47050 | Member of a diversely expressed predicted peptide family showing sequence similarity to tobacco Rapid Alkalinization Factor (RALF), and is believed to play an essential role in the physiology of Arabidopsis. Consists of a single exon and is characterized by a conserved C-terminal motif and N-terminal signal peptide. RALF4 and RALF19 act redundantly in the pollen tube to regulate pollen tube growth.                                                                                                                                          | 102.85  | 11.84  | 8.68  | 5.24E-05 | 1.13E-03 |
| 2643 | 4 | F2-3 vs. M2-3 | 245658_at   | AT1G28270 | pyridoxal-phosphate-dependent serine hydroxymethyltransferase, putative                                                                                                                                                                                                                                                                                                                                                                                                                                                                                    | 109.41  | 12.71  | 8.61  | 2.52E-05 | 7.13E-04 |
| 2644 | 4 | F2-3 vs. M2-3 | 252101_at   | AT3G51290 | (DUF632);(source:Araport11)<br>Encodes a protein required for photosystem I assembly and stability. In Chlamydomonas reinhardtii, this protein seems to act as a PSI specific chaperone facilitating the assembly of the complex by interacting with PsaA and PsaD. A loss of function mutation in tobacco leads to a loss of photosystem I.                                                                                                                                                                                                               | 1103.91 | 132.31 | 8.34  | 2.74E-05 | 7.67E-04 |
| 2645 | 4 | F2-3 vs. M2-3 | 245008_at   | ATCG00360 | Encodes a dual-targeted protein believed to act as a pyruvate, orthophosphate dikinase. These enzymes are normally associated with C4 photosynthesis which does not occur in Arabidopsis. However, PPDK may play a role in remobilizing nitrogen during leaf senescence in Arabidopsis. The product of the long transcript (.1 gene model) was shown to be targeted to the chloroplast, whereas the shorter transcript (no targeting sequence) accumulates in the cytosol. The two proteins were also found to be expressed in slightly different tissues. | 1268.77 | 152.55 | 8.32  | 9.40E-04 | 5.94E-03 |
| 2646 | 4 | F2-3 vs. M2-3 | 245528_at   | AT4G15530 | Encodes PAL1, a phenylalanine ammonia-lyase. Arabidopsis has four PALs: AT2G37040 (PAL1), AT3G53260 (PAL2), AT5G04230 (PAL3) and AT3G10340 (PAL4).                                                                                                                                                                                                                                                                                                                                                                                                         | 163.62  | 19.84  | 8.25  | 2.98E-04 | 3.05E-03 |
| 2647 | 4 | F2-3 vs. M2-3 | 263845_at   | AT2G37040 | Encodes a component of the fatty acid elongation machinery required for C28 to C30 fatty acid elongation. It does not require the acyltransferase catalytic site for biological function.                                                                                                                                                                                                                                                                                                                                                                  | 119.28  | 14.54  | 8.20  | 9.50E-06 | 3.81E-04 |
| 2648 | 4 | F2-3 vs. M2-3 | 254122_at   | AT4G24510 |                                                                                                                                                                                                                                                                                                                                                                                                                                                                                                                                                            | 103.37  | 12.66  | 8.16  | 4.36E-05 | 1.03E-03 |

|      |   |               |                 |           |                                                                                                                                                                                                                                                                                                                                                                                                   |         |        |      |          |          |
|------|---|---------------|-----------------|-----------|---------------------------------------------------------------------------------------------------------------------------------------------------------------------------------------------------------------------------------------------------------------------------------------------------------------------------------------------------------------------------------------------------|---------|--------|------|----------|----------|
| 2649 | 4 | F2-3 vs. M2-3 | 259343_s_a<br>t | AT3G03780 | Encodes a cytosolic methionine synthase, involved in methionine regeneration via the activated methyl cycle (or SAM cycle)                                                                                                                                                                                                                                                                        | 2170.15 | 267.25 | 8.12 | 7.52E-04 | 5.17E-03 |
| 2650 | 4 | F2-3 vs. M2-3 | 247537_s_a      | AT5G61690 | ABC2 homolog 15;(source:Araport11)                                                                                                                                                                                                                                                                                                                                                                | 287.98  | 35.51  | 8.11 | 6.16E-05 | 1.21E-03 |
| 2651 | 4 | F2-3 vs. M2-3 | 247377_at       | AT5G63180 | Pectin lyase-like superfamily protein;(source:Araport11)                                                                                                                                                                                                                                                                                                                                          | 217.85  | 26.94  | 8.09 | 3.80E-06 | 2.30E-04 |
| 2652 | 4 | F2-3 vs. M2-3 | 253487_at       | AT4G31700 | Encodes a putative ribosomal protein S6 (rps6a). RPS6A and RPS6B are fully redundant and essential during gametogenesis.                                                                                                                                                                                                                                                                          | 486.83  | 60.35  | 8.07 | 5.76E-05 | 1.19E-03 |
| 2653 | 4 | F2-3 vs. M2-3 | 262122_at       | AT1G02790 | encodes a exopolysaccharide synthase.                                                                                                                                                                                                                                                                                                                                                             | 119.53  | 14.85  | 8.05 | 1.05E-04 | 1.67E-03 |
| 2654 | 4 | F2-3 vs. M2-3 | 267181_at       | AT2G37760 | Encodes an NADPH-dependent aldo-keto reductase that can act on a wide variety of substrates in vitro including aliphatic and aromatic aldehydes and steroids. Transcript levels for this gene are up-regulated in response to cold, salt, and drought stress.                                                                                                                                     | 180.16  | 22.50  | 8.01 | 1.13E-04 | 1.73E-03 |
| 2655 | 4 | F2-3 vs. M2-3 | 262684_s_a<br>t | AT1G76030 | One of three genes encoding the vacuolar ATP synthase subunit B1. This subunit was shown to interact with the gene product of hexokinase1 (ATHXK1). This interaction, however, is solely restricted to the nucleus. The protein binds to and co-localizes with F-actin, bundles F-actin to form higher-order structure, and stabilizes actin filaments in vitro. The mRNA is cell-to-cell mobile. | 469.85  | 59.20  | 7.94 | 3.83E-04 | 3.51E-03 |
| 2656 | 4 | F2-3 vs. M2-3 | 256627_at       | AT3G19970 | alpha/beta-Hydrolases superfamily protein;(source:Araport11)                                                                                                                                                                                                                                                                                                                                      | 322.22  | 40.58  | 7.94 | 3.59E-05 | 9.26E-04 |
| 2657 | 4 | F2-3 vs. M2-3 | 256745_at       | AT3G29360 | Encodes one of four UDP-glucose dehydrogenase UGD) genes. Mutation of this gene in combination with UGD3 leads to swollen plant cell walls and severe developmental defects associated with changes in pectic polysaccharides.                                                                                                                                                                    | 245.96  | 31.02  | 7.93 | 1.06E-04 | 1.68E-03 |
| 2658 | 4 | F2-3 vs. M2-3 | 253177_s_a      | AT4G35150 | O-methyltransferase family protein;(source:Araport11)                                                                                                                                                                                                                                                                                                                                             | 292.23  | 37.03  | 7.89 | 2.85E-04 | 3.03E-03 |
| 2659 | 4 | F2-3 vs. M2-3 | 263761_at       | AT2G21330 | fructose-bisphosphate aldolase 1;(source:Araport11)                                                                                                                                                                                                                                                                                                                                               | 653.50  | 83.39  | 7.84 | 1.00E-07 | 2.17E-05 |
| 2660 | 4 | F2-3 vs. M2-3 | 251860_at       | AT3G54660 | Encodes glutathione reductase that is most likely localized in the chloroplast.                                                                                                                                                                                                                                                                                                                   | 428.38  | 55.60  | 7.70 | 1.10E-06 | 1.08E-04 |
| 2661 | 4 | F2-3 vs. M2-3 | 247981_at       | AT5G56640 | Myo-Inositol Oxygenase gene family                                                                                                                                                                                                                                                                                                                                                                | 197.13  | 25.84  | 7.63 | 3.60E-06 | 2.23E-04 |
| 2662 | 4 | F2-3 vs. M2-3 | 251697_at       | AT3G56600 | phosphatidylinositol 4-kinase gamma-like protein;(source:Araport11)                                                                                                                                                                                                                                                                                                                               | 129.08  | 16.96  | 7.61 | < 1e-07  | < 1e-07  |
| 2663 | 4 | F2-3 vs. M2-3 | 260829_s_a<br>t | AT2G30440 | Encodes a thylakoidal processing peptidase that removes signal sequences from proteins synthesized in the cytoplasm and transported into the thylakoid lumen. The mRNA is cell-to-cell mobile.                                                                                                                                                                                                    | 123.46  | 16.31  | 7.57 | 1.54E-04 | 2.07E-03 |
| 2664 | 4 | F2-3 vs. M2-3 | 254687_at       | AT4G13770 | Encodes a cytochrome p450 enzyme that catalyzes the initial conversion of aldoximes to thiohydroximates in the synthesis of glucosinolates not derived from tryptophan. Also has a role in auxin homeostasis.                                                                                                                                                                                     | 557.46  | 74.23  | 7.51 | 1.35E-04 | 1.92E-03 |
| 2665 | 4 | F2-3 vs. M2-3 | 258500_at       | AT3G02470 | Encodes a S-adenosylmethionine decarboxylase involved in polyamine biosynthesis.                                                                                                                                                                                                                                                                                                                  | 410.99  | 56.05  | 7.33 | 6.88E-05 | 1.29E-03 |
| 2666 | 4 | F2-3 vs. M2-3 | 267590_at       | AT2G39700 | putative expansin. Naming convention from the Expansin Working Group (Kende et al, 2004. Plant Mol Bio). Involved in the formation of nematode-induced syncytia in roots of Arabidopsis thaliana.                                                                                                                                                                                                 | 110.77  | 15.26  | 7.26 | 4.00E-07 | 5.48E-05 |
| 2667 | 4 | F2-3 vs. M2-3 | 261754_at       | AT1G76130 | alpha-amylase, putative / 1,4-alpha-D-glucan glucanohydrolase, putative, strong similarity to alpha-amylase Gl:7532799 from (Malus x domestica);contains Pfam profile PF00128: Alpha amylase, catalytic domain. Predicted to be secreted based on SignalP analysis.                                                                                                                               | 259.11  | 35.72  | 7.25 | 5.70E-06 | 2.82E-04 |
| 2668 | 4 | F2-3 vs. M2-3 | 262146_at       | AT1G52580 | RHOMBOID-like protein 5;(source:Araport11)                                                                                                                                                                                                                                                                                                                                                        | 176.87  | 24.45  | 7.23 | 1.80E-06 | 1.42E-04 |
| 2669 | 4 | F2-3 vs. M2-3 | 254024_at       | AT4G25780 | CAP (Cysteine-rich secretory proteins, Antigen 5, and Pathogenesis-related 1 protein) superfamily protein;(source:Araport11)                                                                                                                                                                                                                                                                      | 344.77  | 48.00  | 7.18 | 6.26E-05 | 1.21E-03 |
| 2670 | 4 | F2-3 vs. M2-3 | 257986_at       | AT3G20865 | Encodes a putative arabinogalactan-protein (AGP40) that is expressed in pollen.                                                                                                                                                                                                                                                                                                                   | 174.69  | 24.41  | 7.16 | 8.24E-04 | 5.50E-03 |
| 2671 | 4 | F2-3 vs. M2-3 | 254607_at       | AT4G18920 | histone acetyltransferase (DUF1264);(source:Araport11)                                                                                                                                                                                                                                                                                                                                            | 117.33  | 16.51  | 7.11 | 1.10E-06 | 1.08E-04 |
| 2672 | 4 | F2-3 vs. M2-3 | 264204_at       | AT1G22710 | Encodes for a high-affinity transporter essential for phloem loading and long-distance transport. A major sucrose transporter, AtSUC2 can also transport a wide range of physiological and synthetic glucose conjugates with both &#945;- or &#946;-linkage.                                                                                                                                      | 568.29  | 80.20  | 7.09 | 3.42E-04 | 3.28E-03 |
| 2673 | 4 | F2-3 vs. M2-3 | 263867_at       | AT2G36830 | Encodes a tonoplast intrinsic protein, which functions as water channel. It has also been shown to be able to facilitate the transport of urea and hydrogen peroxide. Highly expressed in vascular tissues of the root, stem, cauline leaves and flowers but not in the apical meristems. The mRNA is cell-to-cell mobile.                                                                        | 538.49  | 75.97  | 7.09 | 2.78E-04 | 2.99E-03 |
| 2674 | 4 | F2-3 vs. M2-3 | 258645_s_a      | AT3G07850 | Pectin lyase-like superfamily protein;(source:Araport11)                                                                                                                                                                                                                                                                                                                                          | 116.47  | 16.46  | 7.08 | 4.37E-04 | 3.79E-03 |

|      |   |               |            |           |                                                                                                                                                                                                                                                                                                                                         |        |       |      |          |          |
|------|---|---------------|------------|-----------|-----------------------------------------------------------------------------------------------------------------------------------------------------------------------------------------------------------------------------------------------------------------------------------------------------------------------------------------|--------|-------|------|----------|----------|
| 2675 | 4 | F2-3 vs. M2-3 | 267322_at  | AT2G19330 | Encodes PIRL6, a member of the Plant Intracellular Ras-group-related LRRs (Leucine rich repeat proteins). PIRLs are a distinct, plant-specific class of intracellular LRRs that likely mediate protein interactions, possibly in the context of signal transduction.                                                                    | 128.21 | 18.30 | 7.01 | 6.54E-05 | 1.24E-03 |
| 2676 | 4 | F2-3 vs. M2-3 | 252414_at  | AT3G47420 | Encodes a Pi starvation-responsive protein AtPS3. A member of the phosphate starvation-induced glycerol-3-phosphate permease gene family: AT3G47420(G3Pp1), AT4G25220(G3Pp2), AT1G30560(G3Pp3), AT4G17550(G3Pp4) and AT2G13100(G3Pp5). Its expression is responsive to phosphate (Pi) and not phosphite (Phi) in roots and shoots.      | 125.76 | 18.02 | 6.98 | 3.14E-05 | 8.40E-04 |
| 2677 | 4 | F2-3 vs. M2-3 | 254563_at  | AT4G19120 | S-adenosyl-L-methionine-dependent methyltransferases superfamily protein;(source:Araport11)                                                                                                                                                                                                                                             | 263.57 | 37.90 | 6.95 | 1.18E-04 | 1.77E-03 |
| 2678 | 4 | F2-3 vs. M2-3 | 265002_at  | AT1G24400 | High-affinity transporter for neutral and acidic amino acids, expressed in tapetum tissue of anthers.                                                                                                                                                                                                                                   | 141.66 | 20.52 | 6.90 | 5.20E-06 | 2.71E-04 |
| 2679 | 4 | F2-3 vs. M2-3 | 259736_at  | AT1G64390 | Transport of 1-Aminocyclopropane-1-carboxylic acid (ACC).                                                                                                                                                                                                                                                                               | 279.67 | 40.60 | 6.89 | 2.74E-04 | 2.96E-03 |
| 2680 | 4 | F2-3 vs. M2-3 | 246208_at  | AT4G36490 | glycosyl hydrolase 9C2;(source:Araport11)                                                                                                                                                                                                                                                                                               | 87.18  | 12.64 | 6.89 | 2.30E-06 | 1.62E-04 |
| 2681 | 4 | F2-3 vs. M2-3 | 254123_at  | AT4G24640 | SEC14-like 12;(source:Araport11)                                                                                                                                                                                                                                                                                                        | 79.96  | 11.64 | 6.87 | 2.45E-05 | 7.01E-04 |
| 2682 | 4 | F2-3 vs. M2-3 | 265405_at  | AT2G16750 | Encodes AppB protein (AppB1).                                                                                                                                                                                                                                                                                                           | 159.66 | 23.30 | 6.85 | 9.48E-04 | 5.97E-03 |
| 2683 | 4 | F2-3 vs. M2-3 | 265368_at  | AT2G13350 | kinase with adenine nucleotide alpha hydrolases-like domain-containing protein;(source:Araport11)                                                                                                                                                                                                                                       | 160.80 | 23.54 | 6.83 | 2.39E-05 | 6.95E-04 |
| 2684 | 4 | F2-3 vs. M2-3 | 261015_at  | AT1G26480 | Calcium-dependent lipid-binding (CaLB domain) family protein;(source:Araport11)                                                                                                                                                                                                                                                         | 133.07 | 19.56 | 6.80 | 1.71E-04 | 2.21E-03 |
| 2685 | 4 | F2-3 vs. M2-3 | 261559_at  | AT1G01780 | 14-3-3 protein GF14iota (grf12)                                                                                                                                                                                                                                                                                                         | 115.32 | 17.07 | 6.75 | 1.88E-05 | 6.16E-04 |
| 2686 | 4 | F2-3 vs. M2-3 | 246878_at  | AT5G26060 | Encodes a member of the Arabidopsis LIM proteins: a family of actin bundlers with distinct expression patterns. WLIM1, WLIM2a, and WLIM2b are widely expressed, whereas PLIM2a, PLIM2b, and PLIM2c are predominantly expressed in pollen. Regulates actin cytoskeleton organization. The mRNA is cell-to-cell mobile.                   | 181.18 | 26.83 | 6.75 | 7.20E-06 | 3.12E-04 |
| 2687 | 4 | F2-3 vs. M2-3 | 253619_at  | AT4G30460 | Plant self-incompatibility protein S1 family;(source:Araport11)                                                                                                                                                                                                                                                                         | 199.31 | 29.68 | 6.71 | 7.18E-05 | 1.33E-03 |
| 2688 | 4 | F2-3 vs. M2-3 | 253042_at  | AT4G37550 | glycine-rich protein;(source:Araport11)                                                                                                                                                                                                                                                                                                 | 110.43 | 16.50 | 6.69 | 1.64E-04 | 2.16E-03 |
| 2689 | 4 | F2-3 vs. M2-3 | 262885_at  | AT1G64740 | Acetamidase/Formamidase family protein;(source:Araport11)                                                                                                                                                                                                                                                                               | 427.75 | 65.87 | 6.49 | 4.90E-06 | 2.60E-04 |
| 2690 | 4 | F2-3 vs. M2-3 | 265115_at  | AT1G62450 | alpha-tubulin expressed primarily in stamens and mature pollen                                                                                                                                                                                                                                                                          | 96.12  | 14.96 | 6.43 | 2.87E-05 | 7.94E-04 |
| 2691 | 4 | F2-3 vs. M2-3 | 251898_at  | AT3G54340 | Immunoglobulin E-set superfamily protein;(source:Araport11)                                                                                                                                                                                                                                                                             | 340.64 | 52.97 | 6.43 | 1.16E-04 | 1.76E-03 |
| 2692 | 4 | F2-3 vs. M2-3 | 265091_s_a | AT1G03495 | Floral homeotic gene encoding a MADS domain protein homologous to SRF transcription factors.                                                                                                                                                                                                                                            | 83.95  | 13.10 | 6.41 | 9.70E-06 | 3.86E-04 |
| 2693 | 4 | F2-3 vs. M2-3 | 253344_at  | AT4G33550 | Specifies petal and stamen identities. Associates with PISTILLATA.                                                                                                                                                                                                                                                                      | 128.41 | 20.19 | 6.36 | 4.27E-04 | 3.72E-03 |
| 2694 | 4 | F2-3 vs. M2-3 | 261933_at  | AT1G22410 | HXXXD-type acyl-transferase family protein;(source:Araport11)                                                                                                                                                                                                                                                                           | 592.86 | 94.06 | 6.30 | 5.20E-04 | 4.18E-03 |
| 2695 | 4 | F2-3 vs. M2-3 | 247882_at  | AT5G57785 | Bifunctional inhibitor/lipid-transfer protein/seed storage 2S albumin superfamily protein;(source:Araport11)                                                                                                                                                                                                                            | 172.38 | 27.39 | 6.29 | 3.43E-04 | 3.28E-03 |
| 2696 | 4 | F2-3 vs. M2-3 | 248335_at  | AT5G52450 | Class-II DAHP synthetase family protein;(source:Araport11)                                                                                                                                                                                                                                                                              | 242.51 | 38.76 | 6.26 | 1.58E-05 | 5.45E-04 |
| 2697 | 4 | F2-3 vs. M2-3 | 267298_at  | AT2G23760 | hypothetical protein;(source:Araport11)                                                                                                                                                                                                                                                                                                 | 82.38  | 13.23 | 6.23 | 1.19E-05 | 4.43E-04 |
| 2698 | 4 | F2-3 vs. M2-3 | 261881_at  | AT1G80760 | MATE efflux family protein;(source:Araport11)                                                                                                                                                                                                                                                                                           | 165.55 | 26.64 | 6.22 | 5.68E-05 | 1.19E-03 |
| 2699 | 4 | F2-3 vs. M2-3 | 249048_at  | AT5G44300 | Encodes a member of the BEL family of homeodomain proteins. Plants doubly mutant for saw1/saw2 (blh2/blh4) have serrated leaves. BP is expressed in the serrated leaves, therefore saw2 and saw1 may act redundantly to repress BP in leaves. Regulates together with BLH2 demethylesterification of homogalacturonan in seed mucilage. | 120.44 | 19.38 | 6.22 | 2.33E-05 | 6.86E-04 |
| 2700 | 4 | F2-3 vs. M2-3 | 251591_at  | AT3G57680 | Encodes a protein with boron transporter activity. It helps to preferentially direct boron to young developing tissues in the shoot, such as immature leaves, under low boron conditions. This boron channel appears to be impermeable to water, unlike the closely related NIP5;1 boron transporter.                                   | 272.81 | 43.92 | 6.21 | 3.90E-06 | 2.31E-04 |
| 2701 | 4 | F2-3 vs. M2-3 | 248580_at  | AT5G49890 | This protein also allows the transport of glycerol, urea, and formimide but not larger uncharged solutes such as arabinol and sucrose when it is expressed heterologously.                                                                                                                                                              | 317.19 | 51.25 | 6.19 | 4.60E-06 | 2.55E-04 |
| 2702 | 4 | F2-3 vs. M2-3 | 255008_at  | AT4G10060 | Dormancy/auxin associated family protein;(source:Araport11)                                                                                                                                                                                                                                                                             | 150.03 | 24.34 | 6.16 | 5.60E-06 | 2.82E-04 |
|      |   |               |            |           | Peptidase S41 family protein;(source:Araport11)                                                                                                                                                                                                                                                                                         |        |       |      |          |          |
|      |   |               |            |           | member of Anion channel protein family                                                                                                                                                                                                                                                                                                  |        |       |      |          |          |
|      |   |               |            |           | Glucosylceramidase that preferentially hydrolyzes long acyl chain glucosylceramides.                                                                                                                                                                                                                                                    |        |       |      |          |          |

|      |   |               |            |           |                                                                                                                                                                                                                                                                                                                                                                                                                                                                                                                                                                                                                                                                                                                                                                                                                                                                                                                                                                                                                                                                      |         |        |      |          |          |
|------|---|---------------|------------|-----------|----------------------------------------------------------------------------------------------------------------------------------------------------------------------------------------------------------------------------------------------------------------------------------------------------------------------------------------------------------------------------------------------------------------------------------------------------------------------------------------------------------------------------------------------------------------------------------------------------------------------------------------------------------------------------------------------------------------------------------------------------------------------------------------------------------------------------------------------------------------------------------------------------------------------------------------------------------------------------------------------------------------------------------------------------------------------|---------|--------|------|----------|----------|
|      |   |               |            |           | Encodes CHLOROPLAST RNA BINDING (CRB), a putative RNA-binding protein. CRB is important for the proper functioning of the chloroplast. Mutations in CRB also affects the circadian system, altering the expression of both oscillator and output genes. The mRNA is cell-to-cell mobile.                                                                                                                                                                                                                                                                                                                                                                                                                                                                                                                                                                                                                                                                                                                                                                             | 443.63  | 72.18  | 6.15 | 1.29E-05 | 4.70E-04 |
| 2703 | 4 | F2-3 vs. M2-3 | 263676_at  | AT1G09340 | Heat shock protein 70 (Hsp 70) family protein;(source:Araport11)                                                                                                                                                                                                                                                                                                                                                                                                                                                                                                                                                                                                                                                                                                                                                                                                                                                                                                                                                                                                     | 823.92  | 134.89 | 6.11 | 3.15E-05 | 8.40E-04 |
| 2704 | 4 | F2-3 vs. M2-3 | 258979_at  | AT3G09440 | encodes a pectin methylesterase, targeted by a cellulose binding protein (CBP) from the parasitic nematode <i>Heterodera schachtii</i> during parasitism.                                                                                                                                                                                                                                                                                                                                                                                                                                                                                                                                                                                                                                                                                                                                                                                                                                                                                                            | 134.38  | 21.99  | 6.11 | 3.75E-05 | 9.26E-04 |
| 2705 | 4 | F2-3 vs. M2-3 | 258369_at  | AT3G14310 | H[+]-ATPase 7;(source:Araport11)                                                                                                                                                                                                                                                                                                                                                                                                                                                                                                                                                                                                                                                                                                                                                                                                                                                                                                                                                                                                                                     | 136.02  | 22.43  | 6.06 | 1.82E-05 | 6.12E-04 |
| 2706 | 4 | F2-3 vs. M2-3 | 251405_at  | AT3G60330 |                                                                                                                                                                                                                                                                                                                                                                                                                                                                                                                                                                                                                                                                                                                                                                                                                                                                                                                                                                                                                                                                      |         |        |      |          |          |
|      |   |               |            |           | Encodes a MYC-related transcriptional activator with a typical DNA binding domain of a basic helix-loop-helix leucine zipper motif. Binds to an extended G-Box promoter motif and interacts with Jasmonate ZIM-domain proteins. MYC2 interacts with EIN3 and EIL1 to repress hook curvature and resistance to <i>Botrytis cinera</i> . Its transcription is induced by dehydration stress, ABA treatment and blue light via CRY1. Negative regulator of blue light-mediated photomorphogenic growth and blue and far-red-light-regulated gene expression. Positive regulator of lateral root formation. Regulates diverse JA-dependent functions. Negatively regulates Trp metabolism and biosynthesis of Trp-derived secondary metabolites. Positively regulates flavonoid biosynthesis, resistance to insects, and response to oxidative stress. Regulates other transcription factors, and negatively regulates its own expression. For example it binds to and regulates the expression of NST1. Its stability is modulated by PUB10 through polyubiquitination. | 217.07  | 35.98  | 6.03 | 1.49E-04 | 2.02E-03 |
| 2707 | 4 | F2-3 vs. M2-3 | 261713_at  | AT1G32640 | Encodes a member of the CYP86A subfamily of cytochrome p450 genes. Expressed at highest level in mature stems and flowers.                                                                                                                                                                                                                                                                                                                                                                                                                                                                                                                                                                                                                                                                                                                                                                                                                                                                                                                                           | 72.47   | 12.15  | 5.96 | 6.91E-05 | 1.29E-03 |
| 2708 | 4 | F2-3 vs. M2-3 | 260241_at  | AT1G63710 | One of 4 paralogs encoding a 2-oxoglutarate/Fe(II)-dependent oxygenases that hydroxylates JA to 12-OH-JA.                                                                                                                                                                                                                                                                                                                                                                                                                                                                                                                                                                                                                                                                                                                                                                                                                                                                                                                                                            | 101.56  | 17.03  | 5.96 | 1.12E-05 | 4.26E-04 |
| 2709 | 4 | F2-3 vs. M2-3 | 251770_at  | AT3G55970 |                                                                                                                                                                                                                                                                                                                                                                                                                                                                                                                                                                                                                                                                                                                                                                                                                                                                                                                                                                                                                                                                      |         |        |      |          |          |
| 2710 | 4 | F2-3 vs. M2-3 | 248199_at  | AT5G54170 | Polyketide cyclase/dehydrase and lipid transport superfamily protein;(source:Araport11)                                                                                                                                                                                                                                                                                                                                                                                                                                                                                                                                                                                                                                                                                                                                                                                                                                                                                                                                                                              | 129.98  | 21.80  | 5.96 | 4.40E-06 | 2.49E-04 |
| 2711 | 4 | F2-3 vs. M2-3 | 263533_at  | AT2G24820 | translocon at the inner envelope membrane of chloroplasts 55-II;(source:Araport11)                                                                                                                                                                                                                                                                                                                                                                                                                                                                                                                                                                                                                                                                                                                                                                                                                                                                                                                                                                                   | 472.46  | 80.23  | 5.89 | 1.40E-06 | 1.22E-04 |
|      |   |               |            |           | C2-domain ABA-related (CAR) protein, involved in the recruitment of ABA receptors to the plasma membrane to facilitate ABA signaling. Its stability and dynamic localization is regulated by LOT1.                                                                                                                                                                                                                                                                                                                                                                                                                                                                                                                                                                                                                                                                                                                                                                                                                                                                   | 191.42  | 33.02  | 5.80 | 8.40E-06 | 3.50E-04 |
| 2712 | 4 | F2-3 vs. M2-3 | 262291_at  | AT1G70790 | Methyltransferase in the lignin biosynthetic pathway.                                                                                                                                                                                                                                                                                                                                                                                                                                                                                                                                                                                                                                                                                                                                                                                                                                                                                                                                                                                                                | 923.89  | 159.19 | 5.80 | 2.30E-06 | 1.62E-04 |
| 2713 | 4 | F2-3 vs. M2-3 | 253276_at  | AT4G34050 | Encodes KCS6, a member of the 3-ketoacyl-CoA synthase family involved in the biosynthesis of VLCFA (very long chain fatty acids).                                                                                                                                                                                                                                                                                                                                                                                                                                                                                                                                                                                                                                                                                                                                                                                                                                                                                                                                    | 119.36  | 20.80  | 5.74 | < 1e-07  | < 1e-07  |
| 2714 | 4 | F2-3 vs. M2-3 | 260267_at  | AT1G68530 | methionine adenosyltransferase 3;(source:Araport11)                                                                                                                                                                                                                                                                                                                                                                                                                                                                                                                                                                                                                                                                                                                                                                                                                                                                                                                                                                                                                  | 1834.13 | 319.58 | 5.74 | 2.37E-05 | 6.93E-04 |
| 2715 | 4 | F2-3 vs. M2-3 | 263838_at  | AT2G36880 | Glutathione S-transferase family protein;(source:Araport11)                                                                                                                                                                                                                                                                                                                                                                                                                                                                                                                                                                                                                                                                                                                                                                                                                                                                                                                                                                                                          | 1932.50 | 337.90 | 5.72 | < 1e-07  | < 1e-07  |
| 2716 | 4 | F2-3 vs. M2-3 | 261149_s_a | AT1G19550 | Encodes a protein with similarity to flavonol synthases that is involved in the detoxification polycyclic aromatic hydrocarbons. One of 4 paralogs encoding a 2-oxoglutarate/Fe(II)-dependent oxygenases that hydroxylates JA to 12-OH-JA.                                                                                                                                                                                                                                                                                                                                                                                                                                                                                                                                                                                                                                                                                                                                                                                                                           | 539.28  | 94.36  | 5.71 | 4.95E-04 | 4.10E-03 |
| 2717 | 4 | F2-3 vs. M2-3 | 250793_at  | AT5G05600 | a member of the plasma membrane intrinsic protein PIP2. functions as aquaporin and is involved in desiccation.                                                                                                                                                                                                                                                                                                                                                                                                                                                                                                                                                                                                                                                                                                                                                                                                                                                                                                                                                       | 1863.44 | 327.06 | 5.70 | 3.68E-04 | 3.43E-03 |
| 2718 | 4 | F2-3 vs. M2-3 | 265444_s_a | AT2G37180 | Encodes a putative auto-regulated Ca2+-ATPase located in the plasma membrane involved in transporting Ca2+ outside developing pollen grains. This activity is important to support normal pollen development, particularly the progression to uninucleated microspores to bicellular pollen grains.                                                                                                                                                                                                                                                                                                                                                                                                                                                                                                                                                                                                                                                                                                                                                                  |         |        |      |          |          |
| 2719 | 4 | F2-3 vs. M2-3 | 267255_at  | AT2G22950 |                                                                                                                                                                                                                                                                                                                                                                                                                                                                                                                                                                                                                                                                                                                                                                                                                                                                                                                                                                                                                                                                      | 110.21  | 19.52  | 5.65 | 8.00E-06 | 3.39E-04 |
|      |   |               |            |           | ABC1K7 is a member of an atypical protein kinase family that is induced by salt stress. Loss of function mutations affect the metabolic profile of chloroplast lipids. It appears to function along with ABC1K8 in mediating lipid membrane changes in response to stress.                                                                                                                                                                                                                                                                                                                                                                                                                                                                                                                                                                                                                                                                                                                                                                                           | 296.20  | 52.43  | 5.65 | 3.48E-04 | 3.31E-03 |
| 2720 | 4 | F2-3 vs. M2-3 | 259226_at  | AT3G07700 | member of Oleosin-like protein family                                                                                                                                                                                                                                                                                                                                                                                                                                                                                                                                                                                                                                                                                                                                                                                                                                                                                                                                                                                                                                | 78.96   | 14.04  | 5.62 | 1.29E-04 | 1.88E-03 |
| 2721 | 4 | F2-3 vs. M2-3 | 250610_at  | AT5G07550 | Stress responsive asparagine-rich protein. Binds to PevD ( <i>Verticillium dahliae</i> ) fungal effector protein. NRP interacts with CRY2, leading to increased cytoplasmic accumulation of CRY2 in a blue light-independent manner (PMID:28633330). NRP also binds FyPP3 and recruits it to endosomes and thus targets it for degradation.                                                                                                                                                                                                                                                                                                                                                                                                                                                                                                                                                                                                                                                                                                                          | 278.59  | 49.56  | 5.62 | 3.02E-05 | 8.23E-04 |
| 2722 | 4 | F2-3 vs. M2-3 | 249237_at  | AT5G42050 | Encodes peroxin 13 (PEX13) involved in protein transport into peroxisomes, for example, peroxisomal import of nitric oxide synthase.                                                                                                                                                                                                                                                                                                                                                                                                                                                                                                                                                                                                                                                                                                                                                                                                                                                                                                                                 | 333.44  | 59.80  | 5.58 | 1.28E-04 | 1.88E-03 |
| 2723 | 4 | F2-3 vs. M2-3 | 259068_at  | AT3G07560 | Secretory carrier membrane protein (SCAMP) family protein;(source:Araport11)                                                                                                                                                                                                                                                                                                                                                                                                                                                                                                                                                                                                                                                                                                                                                                                                                                                                                                                                                                                         | 68.36   | 12.29  | 5.56 | 4.79E-05 | 1.08E-03 |
| 2724 | 4 | F2-3 vs. M2-3 | 264835_at  | AT1G03550 |                                                                                                                                                                                                                                                                                                                                                                                                                                                                                                                                                                                                                                                                                                                                                                                                                                                                                                                                                                                                                                                                      |         |        |      |          |          |

|      |   |               |             |           |                                                                                                                                                                                                                                                                                                                                                                                                                                                                                                                                                                                                                                                                                                                                                                                                                                                                                                                                                                                                                                                                                                                                                                                                                                              |         |        |      |          |          |
|------|---|---------------|-------------|-----------|----------------------------------------------------------------------------------------------------------------------------------------------------------------------------------------------------------------------------------------------------------------------------------------------------------------------------------------------------------------------------------------------------------------------------------------------------------------------------------------------------------------------------------------------------------------------------------------------------------------------------------------------------------------------------------------------------------------------------------------------------------------------------------------------------------------------------------------------------------------------------------------------------------------------------------------------------------------------------------------------------------------------------------------------------------------------------------------------------------------------------------------------------------------------------------------------------------------------------------------------|---------|--------|------|----------|----------|
| 2725 | 4 | F2-3 vs. M2-3 | 265923_at   | AT2G18470 | Proline-rich extensin-like receptor kinase 4. Functions at an early stage of ABA signalling inhibiting primary root cell elongation by perturbing Ca2+ homeostasis.                                                                                                                                                                                                                                                                                                                                                                                                                                                                                                                                                                                                                                                                                                                                                                                                                                                                                                                                                                                                                                                                          | 114.45  | 20.63  | 5.55 | 1.87E-05 | 6.16E-04 |
| 2726 | 4 | F2-3 vs. M2-3 | 262432_at   | AT1G47530 | MATE efflux family protein;(source:Araport11)                                                                                                                                                                                                                                                                                                                                                                                                                                                                                                                                                                                                                                                                                                                                                                                                                                                                                                                                                                                                                                                                                                                                                                                                | 203.26  | 36.82  | 5.52 | 1.20E-05 | 4.43E-04 |
| 2727 | 4 | F2-3 vs. M2-3 | 262796_at   | AT1G20850 | Cysteine peptidase. Enzyme activity detected in leaf.                                                                                                                                                                                                                                                                                                                                                                                                                                                                                                                                                                                                                                                                                                                                                                                                                                                                                                                                                                                                                                                                                                                                                                                        | 420.52  | 77.10  | 5.45 | 3.74E-04 | 3.46E-03 |
| 2728 | 4 | F2-3 vs. M2-3 | 264112_at   | AT2G13680 | Responsible for the synthesis of callose deposited at the primary cell wall of meiocytes, tetrads and microspores. Required for exine formation during microgametogenesis and for pollen viability. Highest expression in meiocytes, tetrads, microspores and mature pollen.                                                                                                                                                                                                                                                                                                                                                                                                                                                                                                                                                                                                                                                                                                                                                                                                                                                                                                                                                                 | 84.93   | 15.58  | 5.45 | 7.19E-04 | 5.05E-03 |
| 2729 | 4 | F2-3 vs. M2-3 | 266716_at   | AT2G46820 | Encodes the P subunit of Photosystem I. About 25% of the TMP14 pool appeared to be phosphorylated, and this ratio is not affected by light. Contains seven phosphorylation sites on threonine residue and chloroplast targeting signal. Located in the proximity of PSI-L, -H and -O subunits. Forms oligomers with other members of CURT1 family to modulate grana structure.                                                                                                                                                                                                                                                                                                                                                                                                                                                                                                                                                                                                                                                                                                                                                                                                                                                               | 491.87  | 90.59  | 5.43 | 4.10E-06 | 2.37E-04 |
| 2730 | 4 | F2-3 vs. M2-3 | 253203_at   | AT4G34710 | Encodes a arginine decarboxylase (ADC), a rate-limiting enzyme that catalyzes the first step of polyamine (PA) biosynthesis via ADC pathway in Arabidopsis thaliana. Arabidopsis genome has two ADC paralogs, ADC1 and ADC2. ADC2 is stress-inducible (osmotic stress). Double mutant analysis showed that ADC genes are essential for the production of PA, and are required for normal seed development. Overexpression causes phenotypes similar to GA-deficient plants and these plants show reduced levels of GA due to lower expression levels of AtGA20ox1, AtGA3ox3 and AtGA3ox1.                                                                                                                                                                                                                                                                                                                                                                                                                                                                                                                                                                                                                                                    | 568.70  | 104.82 | 5.43 | 2.14E-04 | 2.52E-03 |
| 2731 | 4 | F2-3 vs. M2-3 | 266673_at   | AT2G29630 | Encodes a protein involved in thiamin biosynthesis. The protein is an iron-sulfur cluster protein predicted to catalyze the conversion of 5-aminoimidazole ribonucleotide (AIR) to hydroxymethylpyrimidine (HMP) or hydroxymethylpyrimidine phosphate (HMP-P). A severe reduction of THIC levels in plants decreases vitamin B1 (thiamin diphosphate (TPP)) levels and also leads to changes in the levels of numerous other metabolites since so many primary metabolic enzymes require a TPP co-factor. thiC mutants are chlorotic and arrest in their development at the cotyledon stage. A N-terminal targeting sequence directs the THIC protein to the chloroplast stroma. A conserved TPP-binding site is located in the 3' UTR of the At2g29630.2 gene model, and is predicted to function as a riboswitch. The riboswitch controls the formation of transcripts with alternative 3' UTR lengths, which affect mRNA accumulation and protein production. THIC transcripts are observed in seedlings 5 or more days after germination, and light promotes the expression of this gene. Recessive mutant isolated by Redei. Leaves but not cotyledons white, lethal; restored to normal by thiamine or 2,5-dimethyl-4-aminopyrimidine. | 290.74  | 53.67  | 5.42 | 2.30E-06 | 1.62E-04 |
| 2732 | 4 | F2-3 vs. M2-3 | 255877_at   | AT2G40460 | Major facilitator superfamily protein;(source:Araport11)                                                                                                                                                                                                                                                                                                                                                                                                                                                                                                                                                                                                                                                                                                                                                                                                                                                                                                                                                                                                                                                                                                                                                                                     | 63.93   | 12.05  | 5.31 | 1.96E-05 | 6.30E-04 |
| 2733 | 4 | F2-3 vs. M2-3 | 253172_at   | AT4G35060 | Heavy metal transport/detoxification superfamily protein;(source:Araport11)                                                                                                                                                                                                                                                                                                                                                                                                                                                                                                                                                                                                                                                                                                                                                                                                                                                                                                                                                                                                                                                                                                                                                                  | 131.29  | 24.91  | 5.27 | 5.61E-04 | 4.37E-03 |
| 2734 | 4 | F2-3 vs. M2-3 | 248073_at   | AT5G55720 | Pectin lyase-like superfamily protein;(source:Araport11)                                                                                                                                                                                                                                                                                                                                                                                                                                                                                                                                                                                                                                                                                                                                                                                                                                                                                                                                                                                                                                                                                                                                                                                     | 59.34   | 11.30  | 5.25 | 2.43E-05 | 7.01E-04 |
| 2735 | 4 | F2-3 vs. M2-3 | 265984_at   | AT2G24210 | terpene synthase 10;(source:Araport11)                                                                                                                                                                                                                                                                                                                                                                                                                                                                                                                                                                                                                                                                                                                                                                                                                                                                                                                                                                                                                                                                                                                                                                                                       | 67.78   | 12.98  | 5.22 | 5.93E-05 | 1.20E-03 |
| 2736 | 4 | F2-3 vs. M2-3 | 259429_at   | AT1G01600 | Encodes a member of the CYP86A subfamily of cytochrome p450 genes. Expressed significantly at highest level in mature stems and flowers.                                                                                                                                                                                                                                                                                                                                                                                                                                                                                                                                                                                                                                                                                                                                                                                                                                                                                                                                                                                                                                                                                                     | 83.99   | 16.17  | 5.19 | 2.31E-05 | 6.86E-04 |
| 2737 | 4 | F2-3 vs. M2-3 | 258685_at   | AT3G07830 | Pectin lyase-like superfamily protein;(source:Araport11)                                                                                                                                                                                                                                                                                                                                                                                                                                                                                                                                                                                                                                                                                                                                                                                                                                                                                                                                                                                                                                                                                                                                                                                     | 241.75  | 46.80  | 5.17 | 2.04E-04 | 2.45E-03 |
| 2738 | 4 | F2-3 vs. M2-3 | 267425_at   | AT2G34810 | FAD-binding Berberine family protein;(source:Araport11)                                                                                                                                                                                                                                                                                                                                                                                                                                                                                                                                                                                                                                                                                                                                                                                                                                                                                                                                                                                                                                                                                                                                                                                      | 91.55   | 17.75  | 5.16 | 1.76E-04 | 2.25E-03 |
| 2739 | 4 | F2-3 vs. M2-3 | 257641_s_at | AT3G25760 | encodes allene oxide cyclase. One of four genes in Arabidopsis that encode this enzyme, which catalyzes an essential step in jasmonic acid biosynthesis. Gene expression is induced during senescence, a process that involves jasmonic acid signalling pathway. The mRNA is cell-to-cell mobile.                                                                                                                                                                                                                                                                                                                                                                                                                                                                                                                                                                                                                                                                                                                                                                                                                                                                                                                                            | 2093.61 | 405.88 | 5.16 | 4.80E-06 | 2.60E-04 |
| 2740 | 4 | F2-3 vs. M2-3 | 256754_at   | AT3G25690 | actin binding protein required for normal chloroplast positioningThe mRNA is cell-to-cell mobile.                                                                                                                                                                                                                                                                                                                                                                                                                                                                                                                                                                                                                                                                                                                                                                                                                                                                                                                                                                                                                                                                                                                                            | 171.65  | 33.36  | 5.15 | 5.19E-05 | 1.13E-03 |
| 2741 | 4 | F2-3 vs. M2-3 | 260221_at   | AT1G74670 | Gibberellin-regulated family protein;(source:Araport11)                                                                                                                                                                                                                                                                                                                                                                                                                                                                                                                                                                                                                                                                                                                                                                                                                                                                                                                                                                                                                                                                                                                                                                                      | 52.25   | 10.16  | 5.14 | 4.06E-05 | 9.74E-04 |
| 2742 | 4 | F2-3 vs. M2-3 | 263718_at   | AT2G13570 | nuclear factor Y, subunit B7;(source:Araport11)                                                                                                                                                                                                                                                                                                                                                                                                                                                                                                                                                                                                                                                                                                                                                                                                                                                                                                                                                                                                                                                                                                                                                                                              | 62.41   | 12.16  | 5.13 | 2.22E-05 | 6.84E-04 |
| 2743 | 4 | F2-3 vs. M2-3 | 248719_at   | AT5G47910 | NADPH/respiratory burst oxidase protein D (RbohD).Interacts with AtrbohF gene to fine tune the spatial control of ROI production and hypersensitive response to cell in and around infection site. The mRNA is cell-to-cell mobile.                                                                                                                                                                                                                                                                                                                                                                                                                                                                                                                                                                                                                                                                                                                                                                                                                                                                                                                                                                                                          | 153.69  | 30.11  | 5.10 | 8.90E-06 | 3.68E-04 |

|      |   |               |            |           |                                                                                                                                                                                                                                                                                                                                                                                                                                                                                          |         |        |      |          |          |
|------|---|---------------|------------|-----------|------------------------------------------------------------------------------------------------------------------------------------------------------------------------------------------------------------------------------------------------------------------------------------------------------------------------------------------------------------------------------------------------------------------------------------------------------------------------------------------|---------|--------|------|----------|----------|
|      |   |               |            |           | Encodes an early light-induced protein. ELIPs are thought not to be directly involved in the synthesis and assembly of specific photosynthetic complexes, but rather affect the biogenesis of all chlorophyll-binding complexes. A study (PMID 17553115) has shown that the chlorophyll synthesis pathway was downregulated as a result of constitutive ELIP2 expression, leading to decreased chlorophyll availability for the assembly of pigment-binding proteins for photosynthesis. | 410.65  | 81.01  | 5.07 | 5.27E-05 | 1.13E-03 |
| 2744 | 4 | F2-3 vs. M2-3 | 245306_at  | AT4G14690 | Encodes mitogen-activated protein kinase 8 (MPK8). MPK8 connects protein phosphorylation, Ca2+, and ROS in the wound-signaling pathway.                                                                                                                                                                                                                                                                                                                                                  | 141.09  | 28.51  | 4.95 | 6.54E-05 | 1.24E-03 |
| 2745 | 4 | F2-3 vs. M2-3 | 256075_at  | AT1G18150 | ENTH/VHS/GAT family protein;(source:Araport11)                                                                                                                                                                                                                                                                                                                                                                                                                                           | 72.84   | 14.77  | 4.93 | 1.38E-04 | 1.95E-03 |
| 2746 | 4 | F2-3 vs. M2-3 | 245636_at  | AT1G25240 | S-adenosylmethionine synthetase                                                                                                                                                                                                                                                                                                                                                                                                                                                          | 2974.07 | 610.00 | 4.88 | 6.60E-06 | 2.99E-04 |
| 2747 | 4 | F2-3 vs. M2-3 | 258415_at  | AT3G17390 | Encodes a protein with biochemical, structural, and biophysical characteristics of a NEET protein. It plays a key role in plant development, senescence, reactive oxygen homeostasis, and Fe metabolism.                                                                                                                                                                                                                                                                                 | 395.40  | 81.32  | 4.86 | 6.24E-05 | 1.21E-03 |
| 2748 | 4 | F2-3 vs. M2-3 | 248377_at  | AT5G51720 | glycine decarboxylase P-protein 1;(source:Araport11)                                                                                                                                                                                                                                                                                                                                                                                                                                     | 597.91  | 123.63 | 4.84 | 8.69E-04 | 5.68E-03 |
| 2749 | 4 | F2-3 vs. M2-3 | 253387_at  | AT4G33010 | Encodes AtTIP1;3, functions as water and urea channels in pollen.                                                                                                                                                                                                                                                                                                                                                                                                                        | 87.64   | 18.38  | 4.77 | 4.65E-05 | 1.07E-03 |
| 2750 | 4 | F2-3 vs. M2-3 | 255580_at  | AT4G01470 | Encodes a putative transcriptional regulator that is involved in the vegetative to reproductive phase transition. Expression is regulated by MIR156b. SPL activity nonautonomously inhibits initiation of new leaves at the shoot apical meristem.                                                                                                                                                                                                                                       | 108.70  | 22.85  | 4.76 | 6.07E-05 | 1.21E-03 |
| 2751 | 4 | F2-3 vs. M2-3 | 267639_at  | AT2G42200 | Fatty acid/sphingolipid desaturase;(source:Araport11)                                                                                                                                                                                                                                                                                                                                                                                                                                    | 154.14  | 32.48  | 4.74 | 2.12E-04 | 2.52E-03 |
| 2752 | 4 | F2-3 vs. M2-3 | 266592_at  | AT2G46210 |                                                                                                                                                                                                                                                                                                                                                                                                                                                                                          |         |        |      |          |          |
|      |   |               |            |           | Encodes a chloroplast-localized protein that modulates cytoplasmic Ca2+ concentration and is crucial for proper stomatal regulation in response to elevations of external Ca2+. Phosphorylation of this protein is dependent on calcium.                                                                                                                                                                                                                                                 | 109.71  | 23.27  | 4.71 | 3.29E-05 | 8.70E-04 |
| 2753 | 4 | F2-3 vs. M2-3 | 249876_at  | AT5G23060 | desiccation-like protein;(source:Araport11)                                                                                                                                                                                                                                                                                                                                                                                                                                              | 172.63  | 36.98  | 4.67 | 1.96E-04 | 2.38E-03 |
| 2754 | 4 | F2-3 vs. M2-3 | 259615_at  | AT1G47980 | Encodes a chloroplast beta-amylase. Is necessary for leaf starch breakdown in the absence of BAM3.Activity of BAM1 increases 4 days after osmotic stress. BAM1 has a higher temperature optimum than BAM3 (PMID:25293962).                                                                                                                                                                                                                                                               | 775.47  | 165.97 | 4.67 | 6.76E-04 | 4.88E-03 |
| 2755 | 4 | F2-3 vs. M2-3 | 256861_at  | AT3G23920 | EXS (ERD1/XPR1/SYG1) family protein;(source:Araport11)                                                                                                                                                                                                                                                                                                                                                                                                                                   | 90.46   | 19.50  | 4.64 | 3.54E-05 | 9.20E-04 |
| 2756 | 4 | F2-3 vs. M2-3 | 257106_at  | AT3G29060 | one of the type IIB calcium pump isoforms. encodes an autoinhibited Ca(2+)-ATPase that contains an N-terminal calmodulin binding autoinhibitory domain.                                                                                                                                                                                                                                                                                                                                  | 60.75   | 13.27  | 4.58 | 1.06E-04 | 1.68E-03 |
| 2757 | 4 | F2-3 vs. M2-3 | 258035_at  | AT3G21180 | stress response NST1-like protein;(source:Araport11)                                                                                                                                                                                                                                                                                                                                                                                                                                     | 115.17  | 25.17  | 4.58 | 1.30E-04 | 1.88E-03 |
| 2758 | 4 | F2-3 vs. M2-3 | 254050_s_a | AT4G25670 |                                                                                                                                                                                                                                                                                                                                                                                                                                                                                          |         |        |      |          |          |
|      |   |               |            |           | member of Cyclic nucleotide gated channel family, downstream component of the signaling pathways leading to HR resistance. mutant plants exhibit gene-for-gene disease resistance against avirulent Pseudomonas syringae despite the near-complete absence of the hypersensitive response (HR). Salicylic acid accumulation in dnd2 mutants is completely PAD4-independent.                                                                                                              | 63.76   | 13.92  | 4.58 | 7.96E-04 | 5.37E-03 |
| 2759 | 4 | F2-3 vs. M2-3 | 248153_at  | AT5G54250 |                                                                                                                                                                                                                                                                                                                                                                                                                                                                                          |         |        |      |          |          |
| 2760 | 4 | F2-3 vs. M2-3 | 262905_at  | AT1G59730 | Thioredoxin H-type 7 , oxidoreductase located in cytosol and ER. Interacts with GPT1.                                                                                                                                                                                                                                                                                                                                                                                                    | 71.76   | 15.80  | 4.54 | 2.10E-04 | 2.49E-03 |
| 2761 | 4 | F2-3 vs. M2-3 | 258151_at  | AT3G18080 | B-S glucosidase 44;(source:Araport11)                                                                                                                                                                                                                                                                                                                                                                                                                                                    | 59.84   | 13.20  | 4.53 | 4.10E-06 | 2.37E-04 |
|      |   |               |            |           | encodes a desulfoglucosinolate sulfotransferase, involved in the final step of glucosinolate core structure biosynthesis. Has a broad-substrate specificity with preference with methionine-derived desulfoglucosinolates.                                                                                                                                                                                                                                                               | 129.03  | 28.53  | 4.52 | 8.00E-07 | 9.26E-05 |
| 2762 | 4 | F2-3 vs. M2-3 | 260385_at  | AT1G74090 |                                                                                                                                                                                                                                                                                                                                                                                                                                                                                          |         |        |      |          |          |
|      |   |               |            |           | Encodes an NADPH-dependent aldo-keto reductase that can act on a wide variety of substrates in vitro including saturated and unsaturated aldehydes, steroids, and sugars. GFP-tagged AKR4C9 localizes to the chloroplast where it may play a role in detoxifying reactive carbonyl compounds that threaten to impair the photosynthetic process. Transcript levels for this gene are up-regulated in response to cold, salt, and drought stress.                                         | 59.97   | 13.29  | 4.51 | 1.24E-05 | 4.55E-04 |
| 2763 | 4 | F2-3 vs. M2-3 | 267168_at  | AT2G37770 | Encodes a GDP-mannose pyrophosphorylase/ mannose-1-pyrophosphatase. This enzyme provides GDP-mannose, which is used for cell wall carbohydrate biosynthesis and protein glycosylation as well as for ascorbate (vitamin C) biosynthesis. Mutations in this gene confer hypersensitivity to NH4+.                                                                                                                                                                                         | 168.92  | 37.47  | 4.51 | 7.59E-04 | 5.21E-03 |
| 2764 | 4 | F2-3 vs. M2-3 | 245060_at  | AT2G39770 |                                                                                                                                                                                                                                                                                                                                                                                                                                                                                          |         |        |      |          |          |
|      |   |               |            |           | Encodes a ferritin protein that is targeted to the chloroplast. Member of a Ferritin gene family. Gene expression is induced in response to iron overload and by nitric oxide. Expression of the gene is downregulated in the presence of paraquat, an inducer of photooxidative stress.                                                                                                                                                                                                 | 139.95  | 31.00  | 4.51 | 5.08E-04 | 4.13E-03 |
| 2765 | 4 | F2-3 vs. M2-3 | 251109_at  | AT5G01600 | Calcium-binding EF-hand family protein;(source:Araport11)                                                                                                                                                                                                                                                                                                                                                                                                                                | 41.21   | 9.15   | 4.50 | 4.99E-04 | 4.10E-03 |
| 2766 | 4 | F2-3 vs. M2-3 | 259044_at  | AT3G03430 |                                                                                                                                                                                                                                                                                                                                                                                                                                                                                          |         |        |      |          |          |

|      |   |               |                         |           |                                                                                                                                                                                                                                                                                                                                                                                                                                                                                                                                                                                                                                                                                                                                                                                                                       |        |        |      |          |          |
|------|---|---------------|-------------------------|-----------|-----------------------------------------------------------------------------------------------------------------------------------------------------------------------------------------------------------------------------------------------------------------------------------------------------------------------------------------------------------------------------------------------------------------------------------------------------------------------------------------------------------------------------------------------------------------------------------------------------------------------------------------------------------------------------------------------------------------------------------------------------------------------------------------------------------------------|--------|--------|------|----------|----------|
| 2767 | 4 | F2-3 vs. M2-3 | 256524_at               | AT1G66200 | encodes a cytosolic glutamate synthetase, this enzyme has low affinity with substrate ammonium                                                                                                                                                                                                                                                                                                                                                                                                                                                                                                                                                                                                                                                                                                                        | 171.66 | 38.26  | 4.49 | 3.46E-04 | 3.30E-03 |
| 2768 | 4 | F2-3 vs. M2-3 | 265022_at               | AT1G24520 | Male fertility gene acting on tapetum and microspore                                                                                                                                                                                                                                                                                                                                                                                                                                                                                                                                                                                                                                                                                                                                                                  | 232.60 | 51.86  | 4.48 | 9.10E-06 | 3.70E-04 |
| 2769 | 4 | F2-3 vs. M2-3 | 266708_at               | AT2G03200 | Atypical aspartic protease which modulates lateral root development.<br>Encodes a protein with glyoxylate aminotransferase activity. It can act on a number of different small                                                                                                                                                                                                                                                                                                                                                                                                                                                                                                                                                                                                                                        | 53.03  | 12.03  | 4.41 | 1.09E-04 | 1.70E-03 |
| 2770 | 4 | F2-3 vs. M2-3 | 260309_at               | AT1G70580 | substrates and amino acids in vitro.<br>Encodes CGR3 (cotton Golgi-related 3). CGR3 and a close homologue CGR2 have overlapping                                                                                                                                                                                                                                                                                                                                                                                                                                                                                                                                                                                                                                                                                       | 387.10 | 88.11  | 4.39 | 3.78E-04 | 3.48E-03 |
| 2771 | 4 | F2-3 vs. M2-3 | 247161_at               | AT5G65810 | roles in pectin methylesterification and plant growth.<br>Encodes one of four UDP-glucose dehydrogenase (UGD) genes. Mutation of this gene in<br>combination with UGD2 leads to swollen plant cell walls and severe developmental defects                                                                                                                                                                                                                                                                                                                                                                                                                                                                                                                                                                             | 373.72 | 85.08  | 4.39 | 6.90E-06 | 3.02E-04 |
| 2772 | 4 | F2-3 vs. M2-3 | 246511_at               | AT5G15490 | associated with changes in pectic polysaccharides.                                                                                                                                                                                                                                                                                                                                                                                                                                                                                                                                                                                                                                                                                                                                                                    | 297.30 | 67.88  | 4.38 | 5.06E-04 | 4.12E-03 |
| 2773 | 4 | F2-3 vs. M2-3 | 265884_at               | AT2G42320 | nucleolar protein gar2-like protein;(source:Araport11)                                                                                                                                                                                                                                                                                                                                                                                                                                                                                                                                                                                                                                                                                                                                                                | 280.30 | 64.16  | 4.37 | 2.40E-06 | 1.67E-04 |
| 2774 | 4 | F2-3 vs. M2-3 | 250608_at               | AT5G07420 | Pectin lyase-like superfamily protein;(source:Araport11)                                                                                                                                                                                                                                                                                                                                                                                                                                                                                                                                                                                                                                                                                                                                                              | 47.42  | 10.95  | 4.33 | 1.40E-04 | 1.95E-03 |
| 2775 | 4 | F2-3 vs. M2-3 | 245806_at               | AT1G45474 | Encodes a component of the light harvesting complex of photosystem I.                                                                                                                                                                                                                                                                                                                                                                                                                                                                                                                                                                                                                                                                                                                                                 | 203.06 | 47.01  | 4.32 | 3.70E-06 | 2.27E-04 |
| 2776 | 4 | F2-3 vs. M2-3 | 263379_at               | AT2G40140 | zinc finger (CCCH-type) family protein;(source:Araport11)                                                                                                                                                                                                                                                                                                                                                                                                                                                                                                                                                                                                                                                                                                                                                             | 220.01 | 50.96  | 4.32 | 2.97E-04 | 3.05E-03 |
| 2777 | 4 | F2-3 vs. M2-3 | AFFX-r2-At-GAPDH-5_s_at | AT3G04120 | encodes cytosolic GAPDH (C subunit) involved in the glycolytic pathway but also interacts with<br>H2O2 potentially placing it in a signalling cascade induced by ROS. The mRNA is cell-to-cell mobile.                                                                                                                                                                                                                                                                                                                                                                                                                                                                                                                                                                                                                | 979.30 | 227.30 | 4.31 | 1.39E-04 | 1.95E-03 |
| 2778 | 4 | F2-3 vs. M2-3 | 264146_at               | AT1G02205 | Expression of the CER1 gene associated with production of stem epicuticular wax and pollen<br>fertility. Biochemical studies showed that cer1 mutants are blocked in the conversion of stem wax<br>C30 aldehydes to C29 alkanes, and they also lack the secondary alcohols and ketones. These<br>suggested the CER1 protein is an aldehyde decarbonylase, but the exact molecular function of this<br>protein remains to be determined.                                                                                                                                                                                                                                                                                                                                                                               | 163.73 | 37.96  | 4.31 | 1.71E-05 | 5.78E-04 |
| 2779 | 4 | F2-3 vs. M2-3 | 256017_at               | AT1G19180 | JAZ1 is a nuclear-localized protein involved in jasmonate signaling. JAZ1 transcript levels rise in<br>response to a jasmonate stimulus. JAZ1 can interact with the COI1 F-box subunit of an SCF E3<br>ubiquitin ligase in a yeast-two-hybrid assay only in the presence of jasmonate-isoleucine (JA-ILE) or<br>coronatine. Application of jasmonate methyl ester to Arabidopsis roots reduces the levels of a<br>JAZ1:GUS fusion protein, presumably by stimulating ubiquitin-proteasome-mediated degradation.<br>The Jas domain appears to be important for JAZ1-COI1 interactions in the presence of coronatine.<br>Two positive residues (R205 and R206) in the Jas domain shown to be important for coronatine -<br>dependent COI1 binding are not required for binding AtMYC2. The mRNA is cell-to-cell mobile. | 311.23 | 72.35  | 4.30 | 1.73E-04 | 2.23E-03 |
| 2780 | 4 | F2-3 vs. M2-3 | 265475_at               | AT2G15620 | Involved in the second step of nitrate assimilation. Its expression is induced by nitrate. The mRNA<br>is cell-to-cell mobile.                                                                                                                                                                                                                                                                                                                                                                                                                                                                                                                                                                                                                                                                                        | 153.29 | 35.86  | 4.28 | 1.75E-04 | 2.23E-03 |
| 2781 | 4 | F2-3 vs. M2-3 | 259848_at               | AT1G72180 | Encodes a leucine-rich repeat receptor kinase that functions as a receptor for CEP1 peptide.<br>Mediates nitrate uptake signaling.                                                                                                                                                                                                                                                                                                                                                                                                                                                                                                                                                                                                                                                                                    | 498.96 | 117.69 | 4.24 | 2.95E-04 | 3.05E-03 |
| 2782 | 4 | F2-3 vs. M2-3 | 245253_at               | AT4G15440 | Encodes a hydroperoxide lyase. Also a member of the CYP74B cytochrome p450 family. In the<br>ecotype Columbia (Col) the gene contains a 10-nucleotide deletion in its first exon that causes it to<br>code for a truncated protein that results in a non-functional hydroperoxide lyase.                                                                                                                                                                                                                                                                                                                                                                                                                                                                                                                              | 94.63  | 22.32  | 4.24 | 3.40E-04 | 3.28E-03 |
| 2783 | 4 | F2-3 vs. M2-3 | 254762_at               | AT4G13230 | Late embryogenesis abundant protein (LEA) family protein;(source:Araport11)                                                                                                                                                                                                                                                                                                                                                                                                                                                                                                                                                                                                                                                                                                                                           | 80.21  | 18.94  | 4.23 | 2.16E-04 | 2.54E-03 |
| 2784 | 4 | F2-3 vs. M2-3 | 256015_at               | AT1G19150 | PSI type II chlorophyll a/b-binding protein (Lhca2*1) mRNA, The mRNA is cell-to-cell mobile.<br>Interacts with AtrbohD gene to fine tune the spatial control of ROI production and hypersensitive<br>response to cell in and around infection site.                                                                                                                                                                                                                                                                                                                                                                                                                                                                                                                                                                   | 247.25 | 58.79  | 4.21 | 3.89E-05 | 9.38E-04 |
| 2785 | 4 | F2-3 vs. M2-3 | 262344_at               | AT1G64060 |                                                                                                                                                                                                                                                                                                                                                                                                                                                                                                                                                                                                                                                                                                                                                                                                                       | 111.00 | 26.44  | 4.20 | 8.97E-04 | 5.79E-03 |
| 2786 | 4 | F2-3 vs. M2-3 | 246308_at               | AT3G51820 | Encodes a protein with chlorophyll synthase activity. This enzyme has been shown to perform the<br>esterification of chlorophyllide (a and b), the last step of chlorophyll biosynthesis. Although it can use<br>either geranylgeranyl pyrophosphate (GGPP) or phytyl pyrophosphate (PhyPP) as substrates, the<br>esterification reaction was faster with GGPP than with PhyPP.                                                                                                                                                                                                                                                                                                                                                                                                                                       | 810.47 | 193.33 | 4.19 | 3.41E-04 | 3.28E-03 |
| 2787 | 4 | F2-3 vs. M2-3 | 265441_at               | AT2G20870 | cell wall protein precursor;(source:Araport11)                                                                                                                                                                                                                                                                                                                                                                                                                                                                                                                                                                                                                                                                                                                                                                        | 96.63  | 23.30  | 4.15 | 7.36E-05 | 1.34E-03 |
| 2788 | 4 | F2-3 vs. M2-3 | 254551_at               | AT4G19840 | encodes a phloem lectin, similar to phloem lectin in cucumber and celery. Gene is expressed in the<br>phloem, predominantly in the companion cells. The mRNA is cell-to-cell mobile.                                                                                                                                                                                                                                                                                                                                                                                                                                                                                                                                                                                                                                  | 226.95 | 54.70  | 4.15 | 5.38E-05 | 1.14E-03 |
| 2789 | 4 | F2-3 vs. M2-3 | 255552_at               | AT4G01850 | S-adenosylmethionine synthetase 2;(source:Araport11)                                                                                                                                                                                                                                                                                                                                                                                                                                                                                                                                                                                                                                                                                                                                                                  | 789.50 | 192.16 | 4.11 | 7.32E-04 | 5.10E-03 |

|      |   |               |            |           |                                                                                                                                                                                                                                                                                                                                                                                                                                                                                                                                                                               |         |        |      |          |          |
|------|---|---------------|------------|-----------|-------------------------------------------------------------------------------------------------------------------------------------------------------------------------------------------------------------------------------------------------------------------------------------------------------------------------------------------------------------------------------------------------------------------------------------------------------------------------------------------------------------------------------------------------------------------------------|---------|--------|------|----------|----------|
| 2790 | 4 | F2-3 vs. M2-3 | 253191_at  | AT4G35350 | tracheary element vacuolar protein                                                                                                                                                                                                                                                                                                                                                                                                                                                                                                                                            | 142.92  | 34.74  | 4.11 | 3.72E-04 | 3.45E-03 |
| 2791 | 4 | F2-3 vs. M2-3 | 245057_at  | AT2G26490 | JGB contains seven WD40 repeats and is highly conserved in flowering plants. Overexpression inhibits pollen germination. suggesting JGB is a negative regulator of pollen germination                                                                                                                                                                                                                                                                                                                                                                                         | 87.01   | 21.33  | 4.08 | 1.34E-05 | 4.81E-04 |
| 2792 | 4 | F2-3 vs. M2-3 | 253833_at  | AT4G27790 | Calcium-binding EF hand family protein;(source:Araport11)                                                                                                                                                                                                                                                                                                                                                                                                                                                                                                                     | 64.50   | 15.83  | 4.07 | 3.30E-04 | 3.22E-03 |
| 2793 | 4 | F2-3 vs. M2-3 | 249536_at  | AT5G38760 | Late embryogenesis abundant protein (LEA) family protein;(source:Araport11)                                                                                                                                                                                                                                                                                                                                                                                                                                                                                                   | 44.98   | 11.06  | 4.07 | 4.74E-05 | 1.07E-03 |
| 2794 | 4 | F2-3 vs. M2-3 | 253954_at  | AT4G26970 | Encodes an aconitase that can catalyze the conversion of citrate to isocitrate through a cis-aconitate intermediate, indicating that it may participate in the TCA cycle and other primary metabolic pathways. The protein is believed to accumulate in the mitochondria and the cytosol. It affects CSD2 (At2g28190 - a superoxide dismutase) transcript levels and may play a role in the response to oxidative stress. One member of the family (ACO1 - At35830) was shown to specifically bind to the 5' UTR of CSD2 in vitro. The mRNA is cell-to-cell mobile.           | 1368.90 | 337.27 | 4.06 | 7.05E-04 | 4.98E-03 |
| 2795 | 4 | F2-3 vs. M2-3 | 247884_at  | AT5G57800 | encodes a transmembrane protein with similarity to the sterol desaturase family at the N-terminus and to the short-chain dehydrogenase/reductase family at the C-terminus. Mutant analyses indicate this protein is involved in cuticle membrane and wax biosynthesis. The mRNA is cell-to-cell mobile.                                                                                                                                                                                                                                                                       | 76.35   | 18.82  | 4.06 | 6.99E-04 | 4.97E-03 |
| 2796 | 4 | F2-3 vs. M2-3 | 265587_at  | AT2G19980 | CAP (Cysteine-rich secretory proteins, Antigen 5, and Pathogenesis-related 1 protein) superfamily protein;(source:Araport11)                                                                                                                                                                                                                                                                                                                                                                                                                                                  | 48.87   | 12.07  | 4.05 | 1.54E-04 | 2.07E-03 |
| 2797 | 4 | F2-3 vs. M2-3 | 260985_at  | AT1G53500 | encodes a putative NDP-L-rhamnose synthase, an enzyme required for the synthesis of the pectin rhamnogalacturonan I, the major component of Arabidopsis mucilage. Gene is involved in seed coat mucilage cell development. Mutant analyses suggest that MUM4 is required for complete mucilage synthesis, cytoplasmic rearrangement and seed coat development.                                                                                                                                                                                                                | 159.28  | 39.44  | 4.04 | 1.25E-04 | 1.84E-03 |
| 2798 | 4 | F2-3 vs. M2-3 | 260805_at  | AT1G78320 | Encodes glutathione transferase belonging to the tau class of GSTs. Naming convention according to Wagner et al. (2002).                                                                                                                                                                                                                                                                                                                                                                                                                                                      | 81.10   | 20.09  | 4.04 | 3.29E-04 | 3.22E-03 |
| 2799 | 4 | F2-3 vs. M2-3 | 265337_at  | AT2G18390 | Encodes a member of ARF-like GTPase family. A thaliana has 21 members, in two subfamilies, ARF and ARF-like (ARL) GTPases. Mutant has abnormal mitosis and cell cycle control during seed development.                                                                                                                                                                                                                                                                                                                                                                        | 411.48  | 101.75 | 4.04 | 1.07E-04 | 1.68E-03 |
| 2800 | 4 | F2-3 vs. M2-3 | 263954_at  | AT2G35840 | Sucrose-6F-phosphate phosphohydrolase family protein;(source:Araport11)                                                                                                                                                                                                                                                                                                                                                                                                                                                                                                       | 865.81  | 214.63 | 4.03 | 1.50E-06 | 1.24E-04 |
| 2801 | 4 | F2-3 vs. M2-3 | 246075_at  | AT5G20410 | Encodes a type B monogalactosyl diacylglycerol (MGDG) synthase. Strongly induced by phosphate deprivation, and in non-photosynthetic tissues. Does not contribute to galactolipid synthesis under Pi-sufficient conditions but does under Pi starvation.                                                                                                                                                                                                                                                                                                                      | 119.37  | 29.63  | 4.03 | 1.59E-04 | 2.12E-03 |
| 2802 | 4 | F2-3 vs. M2-3 | 248967_at  | AT5G45350 | proline-rich family protein;(source:Araport11)                                                                                                                                                                                                                                                                                                                                                                                                                                                                                                                                | 607.93  | 151.04 | 4.02 | 2.74E-05 | 7.67E-04 |
| 2803 | 4 | F2-3 vs. M2-3 | 251091_at  | AT5G01410 | Encodes a protein predicted to function in tandem with PDX2 to form glutamine amidotransferase complex with involved in vitamin B6 biosynthesis.                                                                                                                                                                                                                                                                                                                                                                                                                              | 343.04  | 85.76  | 4.00 | 7.56E-05 | 1.36E-03 |
| 2804 | 4 | F2-3 vs. M2-3 | 265338_at  | AT2G18400 | ribosomal protein L6 family protein;(source:Araport11)                                                                                                                                                                                                                                                                                                                                                                                                                                                                                                                        | 1713.93 | 430.42 | 3.98 | 1.00E-05 | 3.95E-04 |
| 2805 | 4 | F2-3 vs. M2-3 | 247163_at  | AT5G65685 | UDP-Glycosyltransferase superfamily protein;(source:Araport11)                                                                                                                                                                                                                                                                                                                                                                                                                                                                                                                | 56.23   | 14.13  | 3.98 | 3.77E-05 | 9.26E-04 |
| 2806 | 4 | F2-3 vs. M2-3 | 262073_at  | AT1G59640 | A basic helix-loop-helix encoding gene (BIGPETAL, BPE) involved in the control of petal size. BPE is expressed via two mRNAs derived from an alternative splicing event. The BPEub (AT1G59640.1) transcript is expressed ubiquitously, whereas the BPEp (AT1G59640.2) transcript is preferentially expressed in petals. Plants that lack the petal-expressed variant BPEp have larger petals as a result of increased cell size. BPEp is positively regulated downstream of APETALA3, PISTILLATA, APETALA1 and PISTILLATA3 and is negatively regulated downstream of AGAMOUS. | 81.44   | 20.51  | 3.97 | 1.02E-05 | 3.99E-04 |
| 2807 | 4 | F2-3 vs. M2-3 | 253048_at  | AT4G37560 | Acetamidase/Formamidase family protein;(source:Araport11)                                                                                                                                                                                                                                                                                                                                                                                                                                                                                                                     | 42.69   | 10.79  | 3.96 | 1.30E-04 | 1.88E-03 |
| 2808 | 4 | F2-3 vs. M2-3 | 267367_at  | AT2G44210 | carboxyl-terminal peptidase (DUF239);(source:Araport11)                                                                                                                                                                                                                                                                                                                                                                                                                                                                                                                       | 236.26  | 60.54  | 3.90 | 5.54E-04 | 4.36E-03 |
| 2809 | 4 | F2-3 vs. M2-3 | 245333_at  | AT4G14615 | sporulation-specific protein;(source:Araport11)                                                                                                                                                                                                                                                                                                                                                                                                                                                                                                                               | 498.50  | 128.10 | 3.89 | 1.86E-04 | 2.31E-03 |
| 2810 | 4 | F2-3 vs. M2-3 | 252973_s_a | AT4G38740 | Encodes cytosolic cyclophilin ROC1.                                                                                                                                                                                                                                                                                                                                                                                                                                                                                                                                           | 788.19  | 202.75 | 3.89 | 9.66E-05 | 1.57E-03 |
| 2811 | 4 | F2-3 vs. M2-3 | 250547_at  | AT5G08100 | Encodes an asparaginase that catalyzes the degradation of L-asparagine to L-aspartic acid and ammonia.                                                                                                                                                                                                                                                                                                                                                                                                                                                                        | 121.32  | 31.20  | 3.89 | 6.72E-05 | 1.27E-03 |
| 2812 | 4 | F2-3 vs. M2-3 | 252372_at  | AT3G48000 | Encodes a putative (NAD+) aldehyde dehydrogenase.                                                                                                                                                                                                                                                                                                                                                                                                                                                                                                                             | 196.61  | 50.99  | 3.86 | 5.64E-04 | 4.37E-03 |
| 2813 | 4 | F2-3 vs. M2-3 | 262680_at  | AT1G75880 | SGNH hydrolase-type esterase superfamily protein;(source:Araport11)                                                                                                                                                                                                                                                                                                                                                                                                                                                                                                           | 45.44   | 11.80  | 3.85 | 6.17E-05 | 1.21E-03 |
| 2814 | 4 | F2-3 vs. M2-3 | 263477_at  | AT2G31790 | UDP-Glycosyltransferase superfamily protein;(source:Araport11)                                                                                                                                                                                                                                                                                                                                                                                                                                                                                                                | 275.54  | 71.48  | 3.85 | 3.67E-05 | 9.26E-04 |
| 2815 | 4 | F2-3 vs. M2-3 | 251433_at  | AT3G59830 | Integrin-linked protein kinase family;(source:Araport11)                                                                                                                                                                                                                                                                                                                                                                                                                                                                                                                      | 48.98   | 12.72  | 3.85 | 2.90E-04 | 3.04E-03 |



|      |   |               |            |           |                                                                                                                                                                                                                                                                                                                                                                                                                                                                                                                                                        |         |        |      |          |          |
|------|---|---------------|------------|-----------|--------------------------------------------------------------------------------------------------------------------------------------------------------------------------------------------------------------------------------------------------------------------------------------------------------------------------------------------------------------------------------------------------------------------------------------------------------------------------------------------------------------------------------------------------------|---------|--------|------|----------|----------|
| 2816 | 4 | F2-3 vs. M2-3 | 248880_at  | AT5G46200 | carboxyl-terminal proteinase-like protein (DUF239);(source:Araport11)                                                                                                                                                                                                                                                                                                                                                                                                                                                                                  | 84.70   | 22.41  | 3.78 | 1.66E-04 | 2.17E-03 |
|      |   |               |            |           | Phosphoinositide-specific phospholipase C (PI-PLC), catalyzes hydrolysis of phosphatidylinositol 4,5-bisphosphate into inositol 1,4,5-trisphosphate and diacylglycerol. It is involved in auxin biosynthesis and signaling, modulating development of both male and female gametophytes. It also regulates MAMP-triggered immunity by modulating ROS production.                                                                                                                                                                                       |         |        |      |          |          |
| 2817 | 4 | F2-3 vs. M2-3 | 256156_at  | AT3G08510 |                                                                                                                                                                                                                                                                                                                                                                                                                                                                                                                                                        | 175.98  | 46.73  | 3.77 | 5.80E-06 | 2.82E-04 |
| 2818 | 4 | F2-3 vs. M2-3 | 248534_at  | AT5G50030 | Plant invertase/pectin methylesterase inhibitor superfamily protein;(source:Araport11)                                                                                                                                                                                                                                                                                                                                                                                                                                                                 | 53.63   | 14.24  | 3.77 | 7.30E-05 | 1.34E-03 |
|      |   |               |            |           | A member of class I knotted1-like homeobox gene family (together with KNAT2). Similar to the knotted1 (kn1) homeobox gene of maize. Normally expressed in the peripheral and rib zone of shoot apical meristem but not in the leaf primordia. It is also expressed in the fourth floral whorl, in the region that would become style, particularly in the cell surrounding the transmitting tissue. No expression was detected in the first three floral whorls. Expression is repressed by auxin and AS1 which results in the promotion of leaf fate. | 45.01   | 11.99  | 3.75 | 4.22E-04 | 3.70E-03 |
| 2820 | 4 | F2-3 vs. M2-3 | 251228_at  | AT3G62710 | Glycosyl hydrolase family protein;(source:Araport11)                                                                                                                                                                                                                                                                                                                                                                                                                                                                                                   | 89.68   | 23.96  | 3.74 | 1.83E-04 | 2.30E-03 |
| 2821 | 4 | F2-3 vs. M2-3 | 254972_at  | AT4G10440 | S-adenosyl-L-methionine-dependent methyltransferases superfamily protein;(source:Araport11)                                                                                                                                                                                                                                                                                                                                                                                                                                                            | 52.29   | 13.96  | 3.74 | 5.18E-05 | 1.13E-03 |
| 2822 | 4 | F2-3 vs. M2-3 | 261593_at  | AT1G33170 | S-adenosyl-L-methionine-dependent methyltransferases superfamily protein;(source:Araport11)                                                                                                                                                                                                                                                                                                                                                                                                                                                            | 81.44   | 21.89  | 3.72 | 2.30E-05 | 6.86E-04 |
| 2823 | 4 | F2-3 vs. M2-3 | 257037_at  | AT3G19130 | RBP47B, is a component of the stress granule proteome and interacts with 2',3'-cAMP.                                                                                                                                                                                                                                                                                                                                                                                                                                                                   | 93.31   | 25.12  | 3.72 | 5.99E-04 | 4.51E-03 |
| 2824 | 4 | F2-3 vs. M2-3 | 259520_at  | AT1G12320 | ankyrin repeat/KH domain protein (DUF1442);(source:Araport11)                                                                                                                                                                                                                                                                                                                                                                                                                                                                                          | 56.05   | 15.20  | 3.69 | 6.74E-05 | 1.27E-03 |
| 2825 | 4 | F2-3 vs. M2-3 | 264207_at  | AT1G22750 | transmembrane protein;(source:Araport11)                                                                                                                                                                                                                                                                                                                                                                                                                                                                                                               | 133.33  | 36.14  | 3.69 | 7.09E-04 | 4.99E-03 |
| 2826 | 4 | F2-3 vs. M2-3 | 259275_at  | AT3G01060 | lysine-tRNA ligase;(source:Araport11)                                                                                                                                                                                                                                                                                                                                                                                                                                                                                                                  | 275.56  | 74.59  | 3.69 | 1.87E-04 | 2.31E-03 |
| 2827 | 4 | F2-3 vs. M2-3 | 253891_at  | AT4G27720 | Major facilitator superfamily protein;(source:Araport11)<br>Encodes a member of the Arabidopsis LIM proteins: a family of actin bundlers with distinct expression patterns. WLIM1, WLIM2a, and WLIM2b are widely expressed, whereas PLIM2a, PLIM2b, and PLIM2c are predominantly expressed in pollen. Regulates actin cytoskeleton organization.                                                                                                                                                                                                       | 323.22  | 87.70  | 3.69 | 6.25E-05 | 1.21E-03 |
| 2828 | 4 | F2-3 vs. M2-3 | 251361_at  | AT3G61230 | Encodes a myo-inositol oxygenase, which is the first enzyme in the inositol route to ascorbate (L&#8208;ascorbic acid, AsA, vitamin C). Overexpression results in enhanced biomass and abiotic stress tolerance.                                                                                                                                                                                                                                                                                                                                       | 37.73   | 10.24  | 3.68 | 7.62E-04 | 5.21E-03 |
| 2829 | 4 | F2-3 vs. M2-3 | 254001_at  | AT4G26260 | Glycosyl hydrolase family protein;(source:Araport11)                                                                                                                                                                                                                                                                                                                                                                                                                                                                                                   | 56.90   | 15.53  | 3.67 | 4.25E-04 | 3.72E-03 |
| 2830 | 4 | F2-3 vs. M2-3 | 246183_at  | AT5G20940 | Leucine-rich repeat protein kinase family protein;(source:Araport11)                                                                                                                                                                                                                                                                                                                                                                                                                                                                                   | 104.13  | 28.39  | 3.67 | 6.03E-04 | 4.52E-03 |
| 2831 | 4 | F2-3 vs. M2-3 | 257119_at  | AT3G20190 | Sugar isomerase (SIS) family protein;(source:Araport11)                                                                                                                                                                                                                                                                                                                                                                                                                                                                                                | 41.94   | 11.46  | 3.66 | 1.12E-05 | 4.26E-04 |
| 2832 | 4 | F2-3 vs. M2-3 | 251855_at  | AT3G54690 | MYC-related protein with a basic helix-loop-helix motif at the C-terminus and a region similar to the maize B/R family at the N-terminus                                                                                                                                                                                                                                                                                                                                                                                                               | 265.51  | 72.60  | 3.66 | 6.30E-06 | 2.98E-04 |
| 2833 | 4 | F2-3 vs. M2-3 | 255675_at  | AT4G00480 | DUF1230 family protein (DUF1230);(source:Araport11)                                                                                                                                                                                                                                                                                                                                                                                                                                                                                                    | 44.11   | 12.05  | 3.66 | 9.22E-04 | 5.88E-03 |
| 2834 | 4 | F2-3 vs. M2-3 | 246998_at  | AT5G67370 | Encodes MUC110, a galactomannan-1,6-galactosyltransferase. MUC110 likely decorates glucomannan, synthesized by CSLA2, with galactose residues in vivo. The degree of galactosylation is essential for the synthesis of the GGM backbone, the structure of cellulose, mucilage density, as well as the adherence of pectin.                                                                                                                                                                                                                             | 114.04  | 31.20  | 3.66 | 1.40E-04 | 1.95E-03 |
| 2835 | 4 | F2-3 vs. M2-3 | 266802_at  | AT2G22900 | Protein phosphatase 2C family protein;(source:Araport11)                                                                                                                                                                                                                                                                                                                                                                                                                                                                                               | 351.89  | 97.04  | 3.63 | 6.45E-05 | 1.23E-03 |
| 2836 | 4 | F2-3 vs. M2-3 | 256279_at  | AT3G12620 | ABC-2 type transporter family protein;(source:Araport11)                                                                                                                                                                                                                                                                                                                                                                                                                                                                                               | 228.46  | 63.00  | 3.63 | < 1e-07  | 2.17E-05 |
| 2837 | 4 | F2-3 vs. M2-3 | 265741_at  | AT2G01320 | xylem serine peptidase 1;(source:Araport11)                                                                                                                                                                                                                                                                                                                                                                                                                                                                                                            | 53.02   | 14.68  | 3.61 | 5.89E-05 | 1.20E-03 |
| 2838 | 4 | F2-3 vs. M2-3 | 255702_at  | AT4G00230 | B-box type zinc finger family protein;(source:Araport11)                                                                                                                                                                                                                                                                                                                                                                                                                                                                                               | 77.04   | 21.42  | 3.60 | 6.06E-05 | 1.21E-03 |
| 2839 | 4 | F2-3 vs. M2-3 | 257262_at  | AT3G21890 | RAB GTPase homolog G3C;(source:Araport11)                                                                                                                                                                                                                                                                                                                                                                                                                                                                                                              | 382.71  | 106.76 | 3.58 | 7.70E-06 | 3.29E-04 |
| 2840 | 4 | F2-3 vs. M2-3 | 258314_at  | AT3G16100 | Cation efflux family protein which affects ABA-JA crosstalk and susceptibility to Mamestra brassicae herbivory.                                                                                                                                                                                                                                                                                                                                                                                                                                        | 86.00   | 24.09  | 3.57 | 9.64E-05 | 1.57E-03 |
| 2841 | 4 | F2-3 vs. M2-3 | 262751_at  | AT1G16310 | RNA-binding (RRM/RBD/RNP motifs) family protein;(source:Araport11)                                                                                                                                                                                                                                                                                                                                                                                                                                                                                     | 47.94   | 13.46  | 3.56 | 4.90E-06 | 2.60E-04 |
| 2842 | 4 | F2-3 vs. M2-3 | 248758_at  | AT5G47620 | Wound-responsive family protein;(source:Araport11)                                                                                                                                                                                                                                                                                                                                                                                                                                                                                                     | 443.06  | 124.40 | 3.56 | 6.22E-05 | 1.21E-03 |
| 2843 | 4 | F2-3 vs. M2-3 | 261144_s_a | AT1G19660 | NAD(P)-binding Rossmann-fold superfamily protein;(source:Araport11)                                                                                                                                                                                                                                                                                                                                                                                                                                                                                    | 1116.48 | 314.39 | 3.55 | 6.35E-04 | 4.70E-03 |
| 2844 | 4 | F2-3 vs. M2-3 | 266578_at  | AT2G23910 | Encodes a leucine-rich-repeat RLK that is localized to the plasma membrane of pollen tubes and functions with MIK1/2 as the male receptor of the pollen tube chemo-attractant LURE1.MDIS1 forms a complex with MIK1/2 and binds LURE1.                                                                                                                                                                                                                                                                                                                 | 43.18   | 12.18  | 3.55 | 3.16E-05 | 8.40E-04 |
| 2845 | 4 | F2-3 vs. M2-3 | 248916_at  | AT5G45840 |                                                                                                                                                                                                                                                                                                                                                                                                                                                                                                                                                        | 32.27   | 9.19   | 3.51 | 2.85E-04 | 3.03E-03 |

|      |   |               |             |           |                                                                                                                                                                                                                                                                                                                                                                                                                                                                                                                          |        |        |      |          |          |
|------|---|---------------|-------------|-----------|--------------------------------------------------------------------------------------------------------------------------------------------------------------------------------------------------------------------------------------------------------------------------------------------------------------------------------------------------------------------------------------------------------------------------------------------------------------------------------------------------------------------------|--------|--------|------|----------|----------|
| 2846 | 4 | F2-3 vs. M2-3 | 259983_at   | AT1G76490 | Encodes a 3-hydroxy-3-methylglutaryl coenzyme A reductase, which is involved in melavonate biosynthesis and performs the first committed step in isoprenoid biosynthesis. Expression is activated in dark in leaf tissue but not controlled by light in the root (confine The mRNA is cell-to-cell mobile.                                                                                                                                                                                                               | 52.31  | 15.12  | 3.46 | 1.43E-04 | 1.97E-03 |
| 2847 | 4 | F2-3 vs. M2-3 | 245463_at   | AT4G17030 | Encodes EXLB1 (expansin-like B1), a member of the expansin family.                                                                                                                                                                                                                                                                                                                                                                                                                                                       | 101.48 | 29.67  | 3.42 | 1.39E-04 | 1.95E-03 |
| 2848 | 4 | F2-3 vs. M2-3 | 252011_at   | AT3G52720 | Encodes an alpha carbonic anhydrase (CAH1) located in the chloroplast stroma. Most chloroplast proteins are encoded by the nuclear genome and imported with the help of sorting signals that are intrinsic parts of the polypeptides. CAH1 takes an alternative route through the secretory pathway, and becomes N-glycosylated before entering the chloroplast. Glycosylation and intra-molecular disulfide bridge formation are necessary for the correct folding, ER export, trafficking and activity of the protein. | 63.96  | 18.74  | 3.41 | 2.14E-05 | 6.67E-04 |
| 2849 | 4 | F2-3 vs. M2-3 | 254862_at   | AT4G12030 | Required for the biosynthesis of methionine-derived glucosinolates. Involved in the transport of 2-keto acids between chloroplasts and the cytosol.                                                                                                                                                                                                                                                                                                                                                                      | 82.71  | 24.26  | 3.41 | 6.29E-04 | 4.67E-03 |
| 2850 | 4 | F2-3 vs. M2-3 | 258321_at   | AT3G22840 | Encodes an early light-inducible protein.                                                                                                                                                                                                                                                                                                                                                                                                                                                                                | 317.82 | 93.38  | 3.40 | 1.07E-04 | 1.68E-03 |
| 2851 | 4 | F2-3 vs. M2-3 | 256311_at   | AT1G30330 | Encodes a member of the auxin response factor family. Mediates auxin response via expression of auxin regulated genes. Acts redundantly with ARF8 to control stamen elongation and flower maturation. Expression of ARF6 is controlled by miR167.                                                                                                                                                                                                                                                                        | 471.29 | 139.76 | 3.37 | 2.00E-05 | 6.35E-04 |
| 2852 | 4 | F2-3 vs. M2-3 | 255719_at   | AT1G32080 | Encodes a plant LrgAB/CidAB protein localized to the chloroplast envelope that is involved in chloroplast development, carbon partitioning, ABA/drought response, and leaf senescence. The gene may have evolved from gene fusion of bacterial lrgA and lrgB.                                                                                                                                                                                                                                                            | 68.36  | 20.36  | 3.36 | 5.66E-05 | 1.19E-03 |
| 2853 | 4 | F2-3 vs. M2-3 | 251762_at   | AT3G55800 | Encodes the chloroplast enzyme sedoheptulose-1,7-bisphosphatase (SBPase), involved in the carbon reduction of the Calvin cycle. Increase in SBPase activity in transgenic lines accumulate up to 50% more sucrose and starch than wild-type. The mRNA is cell-to-cell mobile.                                                                                                                                                                                                                                            | 595.29 | 177.29 | 3.36 | 4.27E-04 | 3.72E-03 |
| 2854 | 4 | F2-3 vs. M2-3 | 246488_at   | AT5G16010 | 3-oxo-5-alpha-steroid 4-dehydrogenase family protein;(source:Araport11)                                                                                                                                                                                                                                                                                                                                                                                                                                                  | 161.70 | 48.27  | 3.35 | 7.72E-05 | 1.36E-03 |
| 2855 | 4 | F2-3 vs. M2-3 | 249688_at   | AT5G36160 | Encodes a cytosolic L-tyrosine aminotransferase. AtTAT2 exhibits much broader amino donor specificity than AtTAT1 and can use not only Tyr but also Phe, Trp, His, Met, Leu, Ala, Ser, Cys, Asp, Asn, Gln, and Arg as amino donors.                                                                                                                                                                                                                                                                                      | 46.56  | 13.91  | 3.35 | 1.22E-04 | 1.81E-03 |
| 2856 | 4 | F2-3 vs. M2-3 | 264970_at   | AT1G67280 | Encodes a Ni+ dependent glyoxylase.                                                                                                                                                                                                                                                                                                                                                                                                                                                                                      | 755.77 | 226.86 | 3.33 | 7.96E-05 | 1.39E-03 |
| 2857 | 4 | F2-3 vs. M2-3 | 266184_s_at | AT3G54700 | Encodes Pht1;7, a member of the Pht1 family of phosphate transporters which include: Pht1;1/At5g43350, Pht1;2/At5g43370, Pht1;3/At5g43360, Pht1;4/At2g38940, Pht1;5/At2g32830, Pht1;6/At5g43340, Pht1;7/At3g54700, Pht1;8/At1g20860, Pht1;9/At1g76430 (Plant Journal 2002, 31:341).                                                                                                                                                                                                                                      | 49.97  | 15.02  | 3.33 | 8.17E-05 | 1.41E-03 |
| 2858 | 4 | F2-3 vs. M2-3 | 252550_at   | AT3G45870 | nodulin MtN21-like transporter family protein                                                                                                                                                                                                                                                                                                                                                                                                                                                                            | 75.67  | 22.83  | 3.31 | 1.95E-04 | 2.36E-03 |
| 2859 | 4 | F2-3 vs. M2-3 | 253638_at   | AT4G30470 | NAD(P)-binding Rossmann-fold superfamily protein;(source:Araport11)                                                                                                                                                                                                                                                                                                                                                                                                                                                      | 692.57 | 210.42 | 3.29 | 9.01E-04 | 5.81E-03 |
| 2860 | 4 | F2-3 vs. M2-3 | 255645_at   | AT4G00880 | SAUR-like auxin-responsive protein family;(source:Araport11)                                                                                                                                                                                                                                                                                                                                                                                                                                                             | 42.84  | 13.05  | 3.28 | 8.44E-04 | 5.55E-03 |
| 2861 | 4 | F2-3 vs. M2-3 | 246431_at   | AT5G17480 | pollen calcium-binding protein 1;(source:Araport11)                                                                                                                                                                                                                                                                                                                                                                                                                                                                      | 27.48  | 8.38   | 3.28 | 1.10E-06 | 1.08E-04 |
| 2862 | 4 | F2-3 vs. M2-3 | 264558_at   | AT1G09600 | Protein kinase superfamily protein;(source:Araport11)                                                                                                                                                                                                                                                                                                                                                                                                                                                                    | 57.94  | 17.70  | 3.27 | 5.66E-05 | 1.19E-03 |
| 2863 | 4 | F2-3 vs. M2-3 | 256310_at   | AT1G30360 | Early-responsive to dehydration stress protein (ERD4);(source:Araport11)                                                                                                                                                                                                                                                                                                                                                                                                                                                 | 136.21 | 41.62  | 3.27 | 5.37E-04 | 4.27E-03 |
| 2864 | 4 | F2-3 vs. M2-3 | 245501_at   | AT4G15620 | Uncharacterized protein family (UPF0497);(source:Araport11)                                                                                                                                                                                                                                                                                                                                                                                                                                                              | 61.97  | 18.93  | 3.27 | 4.11E-04 | 3.65E-03 |
| 2865 | 4 | F2-3 vs. M2-3 | 256865_at   | AT3G23820 | Encodes a UDP-D-glucuronate 4-epimerase involved in pectin biosynthesis in the cell wall and affects cell wall integrity and immunity to fungi and bacteria. The mRNA is cell-to-cell mobile.                                                                                                                                                                                                                                                                                                                            | 64.04  | 19.72  | 3.25 | 1.43E-04 | 1.97E-03 |
| 2866 | 4 | F2-3 vs. M2-3 | 247994_at   | AT5G56140 | RNA-binding KH domain-containing protein;(source:Araport11)                                                                                                                                                                                                                                                                                                                                                                                                                                                              | 61.06  | 18.99  | 3.22 | 5.71E-05 | 1.19E-03 |
| 2867 | 4 | F2-3 vs. M2-3 | 260014_at   | AT1G68010 | Encodes hydroxypyruvate reductase.                                                                                                                                                                                                                                                                                                                                                                                                                                                                                       | 270.89 | 84.83  | 3.19 | 8.40E-04 | 5.55E-03 |
| 2868 | 4 | F2-3 vs. M2-3 | 264984_at   | AT1G27000 | GRIP/coiled-coil protein, putative (DUF1664);(source:Araport11)                                                                                                                                                                                                                                                                                                                                                                                                                                                          | 163.52 | 51.44  | 3.18 | 1.37E-04 | 1.94E-03 |
| 2869 | 4 | F2-3 vs. M2-3 | 267019_at   | AT2G39130 | Transmembrane amino acid transporter family protein;(source:Araport11)                                                                                                                                                                                                                                                                                                                                                                                                                                                   | 49.98  | 15.72  | 3.18 | 5.97E-04 | 4.51E-03 |
| 2870 | 4 | F2-3 vs. M2-3 | 247440_at   | AT5G62680 | Encodes a high-affinity, proton-dependent glucosinolate-specific transporter that is crucial for the transport of both methionine- and tryptophan-derived glucosinolates to seeds.                                                                                                                                                                                                                                                                                                                                       | 101.68 | 32.01  | 3.18 | 5.65E-04 | 4.37E-03 |
| 2871 | 4 | F2-3 vs. M2-3 | 262264_at   | AT1G42470 | Patched family protein;(source:Araport11)                                                                                                                                                                                                                                                                                                                                                                                                                                                                                | 313.35 | 98.87  | 3.17 | 2.02E-04 | 2.43E-03 |

|      |   |               |                          |           |                                                                                                                                                                                                                                                                                                                                                                                                                            |         |        |      |          |          |
|------|---|---------------|--------------------------|-----------|----------------------------------------------------------------------------------------------------------------------------------------------------------------------------------------------------------------------------------------------------------------------------------------------------------------------------------------------------------------------------------------------------------------------------|---------|--------|------|----------|----------|
|      |   |               |                          |           | Encodes one of eight Arabidopsis actins. ACT4 belongs to the reproductive actin subclass which is predominantly expressed in developing and reproductive tissues, such as pollen, pollen tubes, ovules, and developing seeds. Expression of the ACT4/GUS fusion was restricted to young vascular tissues, tapetum, and developing and mature pollen.                                                                       | 43.81   | 13.99  | 3.13 | 1.22E-04 | 1.81E-03 |
| 2872 | 4 | F2-3 vs. M2-3 | 247736_at                | AT5G59370 |                                                                                                                                                                                                                                                                                                                                                                                                                            |         |        |      |          |          |
| 2873 | 4 | F2-3 vs. M2-3 | 247450_at                | AT5G62350 | Plant invertase/pectin methylesterase inhibitor superfamily protein;(source:Araport11)                                                                                                                                                                                                                                                                                                                                     | 532.94  | 170.10 | 3.13 | 1.30E-04 | 1.88E-03 |
| 2874 | 4 | F2-3 vs. M2-3 | 251157_at                | AT3G63140 | Encodes a protein with ribonuclease activity that is involved in plastid rRNA maturation.                                                                                                                                                                                                                                                                                                                                  | 63.75   | 20.42  | 3.12 | 4.80E-04 | 4.01E-03 |
| 2875 | 4 | F2-3 vs. M2-3 | 245745_at                | AT1G51110 | localized to chloroplasts                                                                                                                                                                                                                                                                                                                                                                                                  | 44.12   | 14.23  | 3.10 | 1.84E-04 | 2.30E-03 |
|      |   |               |                          |           | Encodes an aromatic alcohol:NADP+ oxidoreductase whose mRNA levels are increased in response to treatment with a variety of phytopathogenic bacteria. Though similar to mannitol dehydrogenases, this enzyme does not have mannitol dehydrogenase activity.                                                                                                                                                                | 83.07   | 27.02  | 3.07 | 7.93E-04 | 5.36E-03 |
| 2876 | 4 | F2-3 vs. M2-3 | 252984_at                | AT4G37990 |                                                                                                                                                                                                                                                                                                                                                                                                                            | 96.18   | 31.43  | 3.06 | 2.64E-04 | 2.88E-03 |
| 2877 | 4 | F2-3 vs. M2-3 | 264317_at                | AT1G70310 | Spermidine synthase.                                                                                                                                                                                                                                                                                                                                                                                                       | 199.61  | 65.63  | 3.04 | 7.31E-04 | 5.10E-03 |
| 2878 | 4 | F2-3 vs. M2-3 | 259892_at                | AT1G72610 | germin-like protein (GLP1)                                                                                                                                                                                                                                                                                                                                                                                                 | 100.18  | 32.96  | 3.04 | 5.81E-04 | 4.44E-03 |
| 2879 | 4 | F2-3 vs. M2-3 | 245989_s_a               | AT5G20620 | encodes a ubiquitin polyprotein.                                                                                                                                                                                                                                                                                                                                                                                           | 422.34  | 140.04 | 3.02 | 2.73E-04 | 2.96E-03 |
| 2880 | 4 | F2-3 vs. M2-3 | 259277_at                | AT3G01180 | starch synthase 2;(source:Araport11)                                                                                                                                                                                                                                                                                                                                                                                       | 74.78   | 24.82  | 3.01 | 5.80E-04 | 4.44E-03 |
| 2881 | 4 | F2-3 vs. M2-3 | 248129_at                | AT5G54780 | Ypt/Rab-GAP domain of gyp1p superfamily protein;(source:Araport11)                                                                                                                                                                                                                                                                                                                                                         | 37.70   | 12.52  | 3.01 | 8.44E-04 | 5.55E-03 |
| 2882 | 4 | F2-3 vs. M2-3 | 248146_at                | AT5G54940 | Translation initiation factor SU11 family protein;(source:Araport11)                                                                                                                                                                                                                                                                                                                                                       | 106.67  | 35.55  | 3.00 | 3.43E-04 | 3.28E-03 |
| 2883 | 4 | F2-3 vs. M2-3 | 250366_at                | AT5G11420 | Encodes a DUF642 cell wall protein.                                                                                                                                                                                                                                                                                                                                                                                        |         |        |      |          |          |
|      |   |               |                          |           | the glucosyltransferase (UGT72B1) is involved in metabolizing xenobiotica (chloroaniline and chlorophenole). Comparison between wild type and knock-out mutant demonstrates the central role of this gene for metabolizing chloroaniline but significantly less for chlorophenole. The glucosyltransferase preferred UDP-xylose over UDP-glucose indicating its (additional) functioning as a xylosyltransferase in planta | 40.76   | 13.67  | 2.98 | 2.13E-04 | 2.52E-03 |
| 2884 | 4 | F2-3 vs. M2-3 | 255622_at                | AT4G01070 |                                                                                                                                                                                                                                                                                                                                                                                                                            | 87.76   | 29.50  | 2.97 | 2.98E-04 | 3.05E-03 |
| 2885 | 4 | F2-3 vs. M2-3 | 257886_at                | AT3G17060 | Pectin lyase-like superfamily protein;(source:Araport11)                                                                                                                                                                                                                                                                                                                                                                   |         |        |      |          |          |
|      |   |               |                          |           | Encodes a protein with 1-deoxyxylulose 5-phosphate synthase activity involved in the MEP pathway.                                                                                                                                                                                                                                                                                                                          | 1763.46 | 593.19 | 2.97 | 2.56E-04 | 2.85E-03 |
| 2886 | 4 | F2-3 vs. M2-3 | 245281_at<br>AFFX-r2-At- | AT4G15560 | It is essential for chloroplast development in Arabidopsis                                                                                                                                                                                                                                                                                                                                                                 | 60.23   | 20.37  | 2.96 | 8.35E-04 | 5.53E-03 |
| 2887 | 4 | F2-3 vs. M2-3 | Actin-5_s_at             | AT5G09810 | Member of Actin gene family.Mutants are defective in germination and root growth. The mRNA is cell-to-cell mobile.                                                                                                                                                                                                                                                                                                         | 386.28  | 131.58 | 2.94 | 4.25E-04 | 3.72E-03 |
| 2888 | 4 | F2-3 vs. M2-3 | 260579_at                | AT2G47380 | Cytochrome c oxidase subunit Vc family protein;(source:Araport11)                                                                                                                                                                                                                                                                                                                                                          |         |        |      |          |          |
|      |   |               |                          |           | Encodes a Type One Protein Phosphatase that acts as a nucleocytoplasmic negative regulator of tip growth. Mutants affect pollen germination, pollen tube growth, and root hair growth. It acts genetically downstream of ANX1 (AT3G04690) and ANX2 (AT5G28680) and is functionally redundant with TOPP8 (AT5G27840).                                                                                                       | 332.79  | 113.02 | 2.94 | 5.46E-05 | 1.16E-03 |
| 2889 | 4 | F2-3 vs. M2-3 | 259109_at                | AT3G05580 | Encodes a member of the CYP86A subfamily of cytochrome p450 genes. Expressed at moderate levels in flowers, leaves, roots and stems.                                                                                                                                                                                                                                                                                       | 47.44   | 16.11  | 2.94 | 7.79E-05 | 1.37E-03 |
| 2890 | 4 | F2-3 vs. M2-3 | 255690_at                | AT4G00360 |                                                                                                                                                                                                                                                                                                                                                                                                                            | 61.68   | 20.98  | 2.94 | 7.24E-04 | 5.07E-03 |
| 2891 | 4 | F2-3 vs. M2-3 | 246044_at                | AT5G19450 | calcium-dependent protein kinase (CDPK19) mRNA, complete                                                                                                                                                                                                                                                                                                                                                                   |         |        |      |          |          |
|      |   |               | 265715_s_a               |           | Encodes QUASIMODO2 LIKE1 (QUL1), a paralog of QUASIMODO2 (QUA2). AT1G78240 (QUA2), AT1G13860 (QUL1) and AT2G03480 (QUL2) form a clade with a possible role in plant vasculature development.                                                                                                                                                                                                                               | 38.63   | 13.20  | 2.93 | 7.14E-04 | 5.02E-03 |
| 2892 | 4 | F2-3 vs. M2-3 | t                        | AT1G13860 |                                                                                                                                                                                                                                                                                                                                                                                                                            | 81.49   | 27.94  | 2.92 | 2.29E-05 | 6.86E-04 |
| 2893 | 4 | F2-3 vs. M2-3 | 257071_at                | AT3G28180 | encodes a gene similar to cellulose synthase The mRNA is cell-to-cell mobile.                                                                                                                                                                                                                                                                                                                                              |         |        |      |          |          |
|      |   |               |                          |           | Lesion mimic phenotype when mutation in the gene is combined with a mutation in ACA4. Lesion mimic phenotype of double knockout can be suppressed by nutritional supplements that increase anion levels (e.g. 15 mM Nitrate, Chloride, or Phosphate)                                                                                                                                                                       | 60.27   | 20.82  | 2.90 | 1.63E-05 | 5.55E-04 |
| 2894 | 4 | F2-3 vs. M2-3 | 251649_at                | AT3G57330 |                                                                                                                                                                                                                                                                                                                                                                                                                            |         |        |      |          |          |
|      |   |               |                          |           | GDLSL-motif esterase/acyltransferase/lipase. Enzyme group with broad substrate specificity that may catalyze acyltransfer or hydrolase reactions with lipid and non-lipid substrates.                                                                                                                                                                                                                                      | 73.77   | 25.41  | 2.90 | 4.68E-04 | 3.94E-03 |
| 2895 | 4 | F2-3 vs. M2-3 | 253736_at                | AT4G28780 |                                                                                                                                                                                                                                                                                                                                                                                                                            | 170.78  | 59.10  | 2.89 | 2.41E-04 | 2.74E-03 |
| 2896 | 4 | F2-3 vs. M2-3 | 267429_at                | AT2G34850 | NAD(P)-binding Rossmann-fold superfamily protein;(source:Araport11)                                                                                                                                                                                                                                                                                                                                                        |         |        |      |          |          |
|      |   |               |                          |           | Encodes a high affinity vacuolar calcium antiporter. The residue His 338 is critical to Ca2+ transport activity. Disruption of CAX1 reduces manganese and zinc of shoot tissue and results in a decrease in the activity of vacuolar V-type proton ATPase.                                                                                                                                                                 | 129.56  | 44.89  | 2.89 | 2.99E-04 | 3.05E-03 |
| 2897 | 4 | F2-3 vs. M2-3 | 267093_at                | AT2G38170 |                                                                                                                                                                                                                                                                                                                                                                                                                            | 133.99  | 46.46  | 2.88 | 3.39E-04 | 3.28E-03 |
| 2898 | 4 | F2-3 vs. M2-3 | 251020_at                | AT5G02270 | member of NAP subfamily                                                                                                                                                                                                                                                                                                                                                                                                    |         |        |      |          |          |

|      |   |               |           |           |                                                                                                                                                                                                                                                                                                                                                                                                                                                                                                                                                                                                                                                                                                                                                                                                                                                                               |        |        |      |          |          |
|------|---|---------------|-----------|-----------|-------------------------------------------------------------------------------------------------------------------------------------------------------------------------------------------------------------------------------------------------------------------------------------------------------------------------------------------------------------------------------------------------------------------------------------------------------------------------------------------------------------------------------------------------------------------------------------------------------------------------------------------------------------------------------------------------------------------------------------------------------------------------------------------------------------------------------------------------------------------------------|--------|--------|------|----------|----------|
| 2899 | 4 | F2-3 vs. M2-3 | 265658_at | AT2G13810 | ALD1 is a L-lysine alpha-aminotransferase. It is part of the pipecolic acid biosynthetic pathway, where it catalyzes the biochemical conversion of lysine to epsilon-amino-alpha-ketocaproic acid (KAC) which is subject to subsequent transamination, cyclization and isomerization to form 2,3-dehydropipecolic acid.                                                                                                                                                                                                                                                                                                                                                                                                                                                                                                                                                       | 68.53  | 23.98  | 2.86 | 9.32E-04 | 5.90E-03 |
| 2900 | 4 | F2-3 vs. M2-3 | 247251_at | AT5G64740 | Encodes a cellulose synthase isomer. CESA6 mutants have cellulose defect in the primary cell wall. Multiple lines of evidence suggest that CESA6, along with CESA1 and CESA3 are present in the same plasma membrane complex for cellulose biosynthesis. CESA2 and CESA5 are related to CESA6, having partially redundant roles. As inferred from the null role of secondary wall-type CesAs, included in a set of five primary wall-type CesAs that may support trichome cell wall thickening. The mRNA is cell-to-cell mobile. Identified by cloning the gene that corresponded to a purified protein having glyoxylate aminotransferase activity. Localized to the peroxisome and thought to be involved in photorespiration/ metabolic salvage pathway.                                                                                                                   | 474.52 | 165.92 | 2.86 | 2.60E-04 | 2.87E-03 |
| 2901 | 4 | F2-3 vs. M2-3 | 262988_at | AT1G23310 |                                                                                                                                                                                                                                                                                                                                                                                                                                                                                                                                                                                                                                                                                                                                                                                                                                                                               | 319.54 | 112.18 | 2.85 | 2.73E-04 | 2.96E-03 |
| 2902 | 4 | F2-3 vs. M2-3 | 259771_at | AT1G29470 | S-adenosyl-L-methionine-dependent methyltransferases superfamily protein;(source:Araport11)                                                                                                                                                                                                                                                                                                                                                                                                                                                                                                                                                                                                                                                                                                                                                                                   | 299.55 | 105.09 | 2.85 | 8.02E-04 | 5.39E-03 |
| 2903 | 4 | F2-3 vs. M2-3 | 262868_at | AT1G64980 | Encodes a putative nucleotide-diphospho-sugar transferase required for pollen germination and tube growth.                                                                                                                                                                                                                                                                                                                                                                                                                                                                                                                                                                                                                                                                                                                                                                    | 167.16 | 58.56  | 2.85 | 2.94E-04 | 3.05E-03 |
| 2904 | 4 | F2-3 vs. M2-3 | 252482_at | AT3G46670 | UDP-glucosyl transferase 76E11;(source:Araport11)                                                                                                                                                                                                                                                                                                                                                                                                                                                                                                                                                                                                                                                                                                                                                                                                                             | 53.77  | 18.87  | 2.85 | 4.14E-04 | 3.66E-03 |
| 2905 | 4 | F2-3 vs. M2-3 | 253420_at | AT4G32260 | ATPase, F0 complex, subunit B/B, bacterial/chloroplast;(source:Araport11)                                                                                                                                                                                                                                                                                                                                                                                                                                                                                                                                                                                                                                                                                                                                                                                                     | 365.40 | 128.22 | 2.85 | 2.45E-05 | 7.01E-04 |
| 2906 | 4 | F2-3 vs. M2-3 | 260207_at | AT1G70730 | Encodes a cytosolic phosphoglucumutase (PGM). Two Arabidopsis PGM proteins (AT1G70730/PGM2 and AT1G23190/PGM3) have high sequence similarities and redundant functions. Mature plants possessing a single cPGM allele had a major reduction in cPGM activity. Whereas pgm2 and pgm3 single mutants are undistinguishable from the wild type, loss of both PGM2 and PGM3 severely impairs male and female gametophyte development.                                                                                                                                                                                                                                                                                                                                                                                                                                             | 130.11 | 45.73  | 2.84 | 4.62E-05 | 1.06E-03 |
| 2907 | 4 | F2-3 vs. M2-3 | 257121_at | AT3G20220 | SAUR-like auxin-responsive protein family;(source:Araport11)                                                                                                                                                                                                                                                                                                                                                                                                                                                                                                                                                                                                                                                                                                                                                                                                                  | 49.70  | 17.52  | 2.84 | 1.51E-04 | 2.04E-03 |
| 2908 | 4 | F2-3 vs. M2-3 | 252543_at | AT3G45780 | Blue-light photoreceptor. Contains a light activated serine-threonine kinase domain and LOV1 and LOV2 repeats. Mutants are defective in blue-light response. Mediates blue light-induced growth enhancements. PHOT1 and PHOT2 mediate blue light-dependent activation of the plasma membrane H <sup>+</sup> -ATPase in guard cell protoplasts. PHOT1 undergoes blue-light-dependent autophosphorylation. At least eight phosphorylation sites have been identified in PHOT1. Phosphorylation of serine851 in the activation loop of PHOT1 appears to be required for stomatal opening, chloroplast accumulation, leaf flattening, and phototropism, and phosphorylation of serine849 may also contribute to the regulation of these responses. Phosphorylation-dependent binding of 14-3-3 proteins to the Hinge1 region of PHOT1 appears to require serine350 and serine376. | 41.03  | 14.44  | 2.84 | 5.51E-04 | 4.35E-03 |
| 2909 | 4 | F2-3 vs. M2-3 | 262357_at | AT1G73040 | Mannose-binding lectin superfamily protein;(source:Araport11)                                                                                                                                                                                                                                                                                                                                                                                                                                                                                                                                                                                                                                                                                                                                                                                                                 | 59.47  | 20.99  | 2.83 | 5.93E-04 | 4.49E-03 |
| 2910 | 4 | F2-3 vs. M2-3 | 260560_at | AT2G43590 | Chitinase family protein;(source:Araport11)                                                                                                                                                                                                                                                                                                                                                                                                                                                                                                                                                                                                                                                                                                                                                                                                                                   | 79.51  | 28.16  | 2.82 | 4.17E-04 | 3.68E-03 |
| 2911 | 4 | F2-3 vs. M2-3 | 253963_at | AT4G26470 | Calcium-binding EF-hand family protein;(source:Araport11)                                                                                                                                                                                                                                                                                                                                                                                                                                                                                                                                                                                                                                                                                                                                                                                                                     | 36.72  | 13.01  | 2.82 | 1.51E-04 | 2.04E-03 |
| 2912 | 4 | F2-3 vs. M2-3 | 259498_at | AT1G15880 | Golgi SNARE 11 protein (GOS11)                                                                                                                                                                                                                                                                                                                                                                                                                                                                                                                                                                                                                                                                                                                                                                                                                                                | 557.87 | 198.42 | 2.81 | 3.52E-04 | 3.33E-03 |
| 2913 | 4 | F2-3 vs. M2-3 | 250533_at | AT5G08640 | Encodes a flavonol synthase that catalyzes formation of flavonols from dihydroflavonols. Co-expressed with CHI and CHS (qRT-PCR). Encodes an ortholog of yeast NTF2, a nuclear envelop transport protein that functions as the nuclear import receptor for RanGDP, an essential player in nucleocytoplasmic transport. The mRNA is cell-to-cell mobile.                                                                                                                                                                                                                                                                                                                                                                                                                                                                                                                       | 42.95  | 15.31  | 2.81 | 7.31E-05 | 1.34E-03 |
| 2914 | 4 | F2-3 vs. M2-3 | 259593_at | AT1G27970 |                                                                                                                                                                                                                                                                                                                                                                                                                                                                                                                                                                                                                                                                                                                                                                                                                                                                               | 273.25 | 98.69  | 2.77 | 3.42E-04 | 3.28E-03 |
| 2915 | 4 | F2-3 vs. M2-3 | 245088_at | AT2G39850 | Subtilisin-like serine endopeptidase family protein;(source:Araport11)                                                                                                                                                                                                                                                                                                                                                                                                                                                                                                                                                                                                                                                                                                                                                                                                        | 31.90  | 11.52  | 2.77 | 1.89E-04 | 2.33E-03 |
| 2916 | 4 | F2-3 vs. M2-3 | 245993_at | AT5G20700 | senescence-associated family protein, putative (DUF581);(source:Araport11)                                                                                                                                                                                                                                                                                                                                                                                                                                                                                                                                                                                                                                                                                                                                                                                                    | 686.71 | 247.62 | 2.77 | 1.37E-04 | 1.94E-03 |
| 2917 | 4 | F2-3 vs. M2-3 | 262597_at | AT1G15470 | WD40 nucleoplasmic shuttling protein that positively regulates the Absciscic acid (ABA) response by interacting with and maintaining the stability of ABI5 in the nucleus. Nuclear export of XIW1 is XPO1-dependent. Involved in regulating seed germination, primary root growth, and drought stress resistance.                                                                                                                                                                                                                                                                                                                                                                                                                                                                                                                                                             | 51.45  | 18.64  | 2.76 | 2.30E-06 | 1.62E-04 |
| 2918 | 4 | F2-3 vs. M2-3 | 252107_at | AT3G51490 | tonoplast monosaccharide transporter3;(source:Araport11)                                                                                                                                                                                                                                                                                                                                                                                                                                                                                                                                                                                                                                                                                                                                                                                                                      | 53.55  | 19.41  | 2.76 | 2.70E-06 | 1.80E-04 |

|      |   |               |           |           |                                                                                                                                                                                                                                                                                                                            |         |        |      |          |          |
|------|---|---------------|-----------|-----------|----------------------------------------------------------------------------------------------------------------------------------------------------------------------------------------------------------------------------------------------------------------------------------------------------------------------------|---------|--------|------|----------|----------|
| 2919 | 4 | F2-3 vs. M2-3 | 251598_at | AT3G57600 | encodes a member of the DREB subfamily A-2 of ERF/AP2 transcription factor family. The protein contains one AP2 domain. There are eight members in this subfamily including DREB2A AND DREB2B that are involved in response to drought.                                                                                    | 51.10   | 18.55  | 2.75 | 1.47E-04 | 2.00E-03 |
| 2920 | 4 | F2-3 vs. M2-3 | 254446_at | AT4G20890 | tubulin 9 The mRNA is cell-to-cell mobile.                                                                                                                                                                                                                                                                                 | 220.36  | 80.44  | 2.74 | 4.50E-06 | 2.52E-04 |
| 2921 | 4 | F2-3 vs. M2-3 | 266097_at | AT2G37970 | SOUL heme-binding family protein;(source:Araport11)                                                                                                                                                                                                                                                                        | 144.83  | 53.06  | 2.73 | 4.55E-05 | 1.05E-03 |
| 2922 | 4 | F2-3 vs. M2-3 | 253522_at | AT4G31290 | ChaC-like family protein;(source:Araport11)                                                                                                                                                                                                                                                                                | 296.21  | 108.65 | 2.73 | 5.59E-04 | 4.37E-03 |
| 2923 | 4 | F2-3 vs. M2-3 | 264394_at | AT1G11860 | Glycine cleavage T-protein family;(source:Araport11)                                                                                                                                                                                                                                                                       | 1332.93 | 489.69 | 2.72 | 2.33E-04 | 2.68E-03 |
| 2924 | 4 | F2-3 vs. M2-3 | 263950_at | AT2G36020 | HVA22-like protein J;(source:Araport11)                                                                                                                                                                                                                                                                                    | 41.48   | 15.24  | 2.72 | 1.66E-04 | 2.17E-03 |
| 2925 | 4 | F2-3 vs. M2-3 | 266558_at | AT2G23900 | Pectin lyase-like superfamily protein;(source:Araport11)                                                                                                                                                                                                                                                                   | 42.05   | 15.52  | 2.71 | 8.18E-04 | 5.47E-03 |
| 2926 | 4 | F2-3 vs. M2-3 | 249910_at | AT5G22630 | Encodes a plastid-localized arogenate dehydratase involved in phenylalanine biosynthesis. Not less than six genes encoding ADT were identified in the Arabidopsis genome: ADT1 [At1g11790]; ADT2 [At3g07630]; ADT3 [At2g27820]; ADT4 [At3g44720]; ADT5 [At5g22630]; and ADT6 [At1g08250]. The mRNA is cell-to-cell mobile. | 42.31   | 15.63  | 2.71 | 2.32E-05 | 6.86E-04 |
| 2927 | 4 | F2-3 vs. M2-3 | 258512_at | AT3G06510 | Encodes a protein with beta-glucosidase and galactosyltransferase activity, mutants show increased sensitivity to freezing. Though it is classified as a family I glycosyl hydrolase, it has no hydrolase activity in vitro.                                                                                               | 635.18  | 237.33 | 2.68 | 5.76E-04 | 4.42E-03 |
| 2928 | 4 | F2-3 vs. M2-3 | 245854_at | AT5G13490 | Encodes mitochondrial ADP/ATP carrier                                                                                                                                                                                                                                                                                      | 792.90  | 296.40 | 2.68 | 9.57E-04 | 6.01E-03 |
| 2929 | 4 | F2-3 vs. M2-3 | 261601_at | AT1G49670 | molecular function has not been defined. Was shown involved in oxidative stress tolerance. Encodes phosphatidylinositol-4-phosphate 5-kinase 6 (PIP5K6). Regulates clathrin-dependent endocytosis in pollen tubes.                                                                                                         | 74.57   | 27.94  | 2.67 | 2.99E-04 | 3.05E-03 |
| 2930 | 4 | F2-3 vs. M2-3 | 258690_at | AT3G07960 |                                                                                                                                                                                                                                                                                                                            | 54.23   | 20.33  | 2.67 | 2.88E-04 | 3.03E-03 |
| 2931 | 4 | F2-3 vs. M2-3 | 245292_at | AT4G15093 | catalytic LigB subunit of aromatic ring-opening dioxygenase family;(source:Araport11)                                                                                                                                                                                                                                      | 102.31  | 38.45  | 2.66 | 2.61E-04 | 2.88E-03 |
| 2932 | 4 | F2-3 vs. M2-3 | 252921_at | AT4G39030 | Encodes an orphan multidrug and toxin extrusion transporter. Essential component of salicylic acid-dependent signaling for disease resistance. Member of the MATE-transporter family. Expression induced by salicylic acid. Mutants are salicylic acid-deficient.                                                          | 133.36  | 50.11  | 2.66 | 6.07E-04 | 4.54E-03 |
| 2933 | 4 | F2-3 vs. M2-3 | 260288_at | AT1G80530 | Major facilitator superfamily protein;(source:Araport11)                                                                                                                                                                                                                                                                   | 569.48  | 215.09 | 2.65 | 5.60E-04 | 4.37E-03 |
| 2934 | 4 | F2-3 vs. M2-3 | 250174_at | AT5G14380 | Encodes an arabinogalactan protein that is expressed in pollen, pollen sac and pollen tube. Loss of AGP6 function results in decreased fertility due to defects in pollen tube growth.                                                                                                                                     | 45.62   | 17.23  | 2.65 | 4.91E-04 | 4.07E-03 |
| 2935 | 4 | F2-3 vs. M2-3 | 263012_at | AT1G23380 | homeodomain transcription factor KNAT6, belonging to class I of KN transcription factor family (which also includes KNAT1 and KNAT2). Expression is increased in as and bop1 leaf mutants. encodes a cytosolic glutamine synthetase, the enzyme has low affinity with substrate ammonium                                   | 40.26   | 15.32  | 2.63 | 8.86E-04 | 5.74E-03 |
| 2936 | 4 | F2-3 vs. M2-3 | 258160_at | AT3G17820 | The mRNA is cell-to-cell mobile.                                                                                                                                                                                                                                                                                           | 320.10  | 122.30 | 2.62 | 1.16E-04 | 1.76E-03 |
| 2937 | 4 | F2-3 vs. M2-3 | 250129_at | AT5G16450 | Ribonuclease E inhibitor RraA/Dimethylmenaquinone methyltransferase;(source:Araport11)                                                                                                                                                                                                                                     | 518.33  | 197.60 | 2.62 | 3.79E-04 | 3.48E-03 |
| 2938 | 4 | F2-3 vs. M2-3 | 264931_at | AT1G60590 | Pectin lyase-like superfamily protein;(source:Araport11)                                                                                                                                                                                                                                                                   | 45.43   | 17.39  | 2.61 | 3.10E-04 | 3.09E-03 |
| 2939 | 4 | F2-3 vs. M2-3 | 259056_at | AT3G03420 | Ku70-binding family protein;(source:Araport11)                                                                                                                                                                                                                                                                             | 68.87   | 26.41  | 2.61 | 5.89E-04 | 4.47E-03 |
| 2940 | 4 | F2-3 vs. M2-3 | 250633_at | AT5G07460 | ubiquitous enzyme that repairs oxidatively damaged proteins. Methionine sulfoxide reductase activity. Mutant lacking reductase activity showed increased protein oxidation, nitration and glycation of specific amino acid residues during darkness.                                                                       | 33.90   | 12.97  | 2.61 | 2.26E-04 | 2.63E-03 |
| 2941 | 4 | F2-3 vs. M2-3 | 249090_at | AT5G43745 | ion channel POLLUX-like protein, putative (DUF1012);(source:Araport11)                                                                                                                                                                                                                                                     | 46.18   | 17.73  | 2.61 | 4.84E-04 | 4.03E-03 |
| 2942 | 4 | F2-3 vs. M2-3 | 264760_at | AT1G61290 | member of SYP12 Gene Family                                                                                                                                                                                                                                                                                                | 69.41   | 26.70  | 2.60 | 4.42E-04 | 3.81E-03 |
| 2943 | 4 | F2-3 vs. M2-3 | 250565_at | AT5G08000 | Encodes a member of the X8-GPI family of proteins. It localizes to the plasmodesmata and binds callose.                                                                                                                                                                                                                    | 153.12  | 58.88  | 2.60 | 8.00E-04 | 5.38E-03 |
| 2944 | 4 | F2-3 vs. M2-3 | 248822_at | AT5G47000 | Peroxidase superfamily protein;(source:Araport11)                                                                                                                                                                                                                                                                          | 27.13   | 10.45  | 2.60 | 3.71E-04 | 3.44E-03 |
| 2945 | 4 | F2-3 vs. M2-3 | 262179_at | AT1G77980 | Encodes a member of the MIKC (MADS box, Keratin binding domain, and C terminal domain containing)family of transcriptional regulators. AGL66 is expressed in pollen.It forms heterodimers with other MICK family members (AGL104). Involved in late stages of pollen development and pollen tube growth.                   | 46.35   | 17.90  | 2.59 | 3.59E-04 | 3.36E-03 |
| 2946 | 4 | F2-3 vs. M2-3 | 259348_at | AT3G03770 | Leucine-rich repeat protein kinase family protein;(source:Araport11)                                                                                                                                                                                                                                                       | 315.60  | 121.91 | 2.59 | 6.62E-04 | 4.83E-03 |

|      |   |               |                 |           |                                                                                                                                                                                                                                                                                                                                                                                                                                                                             |         |        |      |          |          |
|------|---|---------------|-----------------|-----------|-----------------------------------------------------------------------------------------------------------------------------------------------------------------------------------------------------------------------------------------------------------------------------------------------------------------------------------------------------------------------------------------------------------------------------------------------------------------------------|---------|--------|------|----------|----------|
| 2947 | 4 | F2-3 vs. M2-3 | 261059_at       | AT1G01250 | encodes a member of the DREB subfamily A-4 of ERF/AP2 transcription factor family. The protein contains one AP2 domain. There are 17 members in this subfamily including TINY.                                                                                                                                                                                                                                                                                              | 39.14   | 15.16  | 2.58 | 2.09E-04 | 2.49E-03 |
| 2948 | 4 | F2-3 vs. M2-3 | 246215_at       | AT4G37180 | UIF1 is a nuclear and cytoplasmically localized myb-domain containing member of the GARP G2-like subfamily of transcription factors. Interacts with ULT1 and binds to the WUS promoter. UIF1 binding domains are also found in CUC and AG promoters suggesting they are also direct targets.                                                                                                                                                                                | 26.46   | 10.30  | 2.57 | 4.70E-05 | 1.07E-03 |
| 2949 | 4 | F2-3 vs. M2-3 | 264603_at       | AT1G04670 | This locus was also identified as a putative cytoskeletal protein in a yeast screen.<br>hypothetical protein;(source:Araport11)                                                                                                                                                                                                                                                                                                                                             | 22.63   | 8.87   | 2.55 | 1.17E-05 | 4.42E-04 |
| 2950 | 4 | F2-3 vs. M2-3 | 267470_at       | AT2G30490 | Encodes a cinnamate-4-hydroxylase. Mutations in this gene impact phenylpropanoid metabolism, growth and development.                                                                                                                                                                                                                                                                                                                                                        | 155.23  | 61.19  | 2.54 | 5.38E-04 | 4.27E-03 |
| 2951 | 4 | F2-3 vs. M2-3 | 255997_s_a<br>t | AT1G29930 | Subunit of light-harvesting complex II (LHCII), which absorbs light and transfers energy to the photosynthetic reaction center. The mRNA is cell-to-cell mobile.                                                                                                                                                                                                                                                                                                            | 1896.68 | 751.47 | 2.52 | 1.77E-04 | 2.25E-03 |
| 2952 | 4 | F2-3 vs. M2-3 | 256020_at       | AT1G58290 | Encodes a protein with glutamyl-tRNA reductase (GluTR) activity, catalyzing the NADPH-dependent reduction of Glu-tRNA(Glu) to glutamate 1-semialdehyde (GSA) with the release of free tRNA(Glu). It is involved in the early steps of chlorophyll biosynthesis.                                                                                                                                                                                                             | 114.85  | 45.57  | 2.52 | 4.00E-04 | 3.59E-03 |
| 2953 | 4 | F2-3 vs. M2-3 | 254491_at       | AT4G20300 | Serine/Threonine-kinase, putative (DUF1639);(source:Araport11)                                                                                                                                                                                                                                                                                                                                                                                                              | 161.87  | 64.55  | 2.51 | 5.00E-04 | 4.10E-03 |
| 2954 | 4 | F2-3 vs. M2-3 | 253551_at       | AT4G30996 | NKS1, a plant-specific gene, encodes a 19 kDa endomembrane-localized protein. It is part of SOS independent ion homeostasis regulation pathway.                                                                                                                                                                                                                                                                                                                             | 818.57  | 325.60 | 2.51 | 4.49E-05 | 1.05E-03 |
| 2955 | 4 | F2-3 vs. M2-3 | 249773_at       | AT5G24140 | Encodes a protein with similarity to squalene monooxygenases.                                                                                                                                                                                                                                                                                                                                                                                                               | 29.38   | 11.72  | 2.51 | 5.65E-04 | 4.37E-03 |
| 2956 | 4 | F2-3 vs. M2-3 | 249754_at       | AT5G24530 | Encodes a putative 2OG-Fe(II) oxygenase that is defense-associated but required for susceptibility to downy mildew. The mRNA is cell-to-cell mobile.                                                                                                                                                                                                                                                                                                                        | 82.43   | 32.85  | 2.51 | 3.64E-05 | 9.26E-04 |
| 2957 | 4 | F2-3 vs. M2-3 | 263166_at       | AT1G03050 | Phosphatidylinositol binding clathrin assembly protein 5A/B are recent paralogs with overlapping functions in recycling ANXUR proteins to the pollen tube membrane.                                                                                                                                                                                                                                                                                                         | 42.99   | 17.19  | 2.50 | 1.10E-04 | 1.70E-03 |
| 2958 | 4 | F2-3 vs. M2-3 | 260968_at       | AT1G12250 | Pentapeptide repeat-containing protein;(source:Araport11)                                                                                                                                                                                                                                                                                                                                                                                                                   | 118.35  | 47.57  | 2.49 | 3.20E-04 | 3.16E-03 |
| 2959 | 4 | F2-3 vs. M2-3 | 260777_at       | AT1G14560 | Encodes a mitochondrial CoA transporter.                                                                                                                                                                                                                                                                                                                                                                                                                                    | 74.05   | 29.79  | 2.49 | 4.84E-04 | 4.03E-03 |
| 2960 | 4 | F2-3 vs. M2-3 | 266275_at       | AT2G29370 | NAD(P)-binding Rossmann-fold superfamily protein;(source:Araport11)                                                                                                                                                                                                                                                                                                                                                                                                         | 61.87   | 24.89  | 2.49 | 1.70E-04 | 2.21E-03 |
| 2961 | 4 | F2-3 vs. M2-3 | 266867_at       | AT2G45770 | chloroplast SRP receptor homolog, alpha subunit CPFTSY. Required for LHCP integration into isolated thylakoids.                                                                                                                                                                                                                                                                                                                                                             | 72.55   | 29.17  | 2.49 | 7.91E-04 | 5.36E-03 |
| 2962 | 4 | F2-3 vs. M2-3 | 254605_at       | AT4G18950 | BHP1 is a Raf-like protein kinase involved in mediating blue light dependent stomatal opening.                                                                                                                                                                                                                                                                                                                                                                              | 45.52   | 18.25  | 2.49 | 1.02E-04 | 1.65E-03 |
| 2963 | 4 | F2-3 vs. M2-3 | 257816_at       | AT3G25140 | Quasimodo1, encodes a glycosyltransferase, involved in homogalacturonan biosynthesis; mutant shows cell adhesion defect and lower wall uronic acid content. The mRNA is cell-to-cell mobile.                                                                                                                                                                                                                                                                                | 397.28  | 160.01 | 2.48 | 8.11E-04 | 5.43E-03 |
| 2964 | 4 | F2-3 vs. M2-3 | 252271_s_a      | AT5G01430 | Got1/Sft2-like vesicle transport protein family;(source:Araport11)                                                                                                                                                                                                                                                                                                                                                                                                          | 112.91  | 45.55  | 2.48 | 2.51E-04 | 2.82E-03 |
| 2965 | 4 | F2-3 vs. M2-3 | 261376_at       | AT1G18660 | Membrane localized protein of unknown function. Involved in negative regulation of immune response. Mutants have increased resistance to pathogens.                                                                                                                                                                                                                                                                                                                         | 108.92  | 44.15  | 2.47 | 9.83E-04 | 6.11E-03 |
| 2966 | 4 | F2-3 vs. M2-3 | 257749_at       | AT3G18780 | Encodes an actin that is constitutively expressed in vegetative structures but not pollen. ACT2 is involved in tip growth of root hairs.                                                                                                                                                                                                                                                                                                                                    | 1106.73 | 447.72 | 2.47 | 9.69E-05 | 1.57E-03 |
| 2967 | 4 | F2-3 vs. M2-3 | 251928_at       | AT3G53980 | Bifunctional inhibitor/lipid-transfer protein/seed storage 2S albumin superfamily protein;(source:Araport11)                                                                                                                                                                                                                                                                                                                                                                | 82.08   | 33.26  | 2.47 | 2.09E-04 | 2.49E-03 |
| 2968 | 4 | F2-3 vs. M2-3 | 245939_at       | AT5G19760 | Encodes a novel mitochondrial carrier capable of transporting both dicarboxylates (such as malate, oxaloacetate, oxoglutarate, and maleate) and tricarboxylates (such as citrate, isocitrate, cis-aconitate, and trans-aconitate).                                                                                                                                                                                                                                          | 1006.70 | 407.79 | 2.47 | 7.84E-04 | 5.32E-03 |
| 2969 | 4 | F2-3 vs. M2-3 | 247979_at       | AT5G56750 | AGB1/AGG dimmer interacting protein, response to water deficit.                                                                                                                                                                                                                                                                                                                                                                                                             | 46.29   | 18.77  | 2.47 | 6.11E-05 | 1.21E-03 |
| 2970 | 4 | F2-3 vs. M2-3 | 248200_at       | AT5G54160 | A caffeic acid/5-hydroxyferulic acid O-methyltransferase. Interacts with 14-4-3 proteins in yeast 2 hybrid assay. AtOMT1 (At5g54160) encodes a flavonol 3?-O-methyltransferase that is highly active towards quercetin and myricetin. The substrate specificity identifies the enzyme as flavonol 3?-methyltransferase which replaces the former annotation of the gene to encode a caffeic acid/5-hydroxyferulic acid O-methyltransferase The mRNA is cell-to-cell mobile. | 572.46  | 232.47 | 2.46 | 6.08E-05 | 1.21E-03 |
| 2971 | 4 | F2-3 vs. M2-3 | 261506_at       | AT1G71697 | Encodes choline kinase. mRNA levels are increased in response to wounding. The mRNA is cell-to-cell mobile.                                                                                                                                                                                                                                                                                                                                                                 | 39.45   | 16.11  | 2.45 | 2.59E-04 | 2.87E-03 |
| 2972 | 4 | F2-3 vs. M2-3 | 266461_at       | AT2G47730 | Encodes glutathione transferase belonging to the phi class of GSTs. Naming convention according to Wagner et al. (2002).                                                                                                                                                                                                                                                                                                                                                    | 137.67  | 56.15  | 2.45 | 3.41E-04 | 3.28E-03 |

|      |   |               |            |           |                                                                                                                                                                                                                                                                                                                                                                                                                                                                                                                                                                                                                     |        |        |      |          |          |
|------|---|---------------|------------|-----------|---------------------------------------------------------------------------------------------------------------------------------------------------------------------------------------------------------------------------------------------------------------------------------------------------------------------------------------------------------------------------------------------------------------------------------------------------------------------------------------------------------------------------------------------------------------------------------------------------------------------|--------|--------|------|----------|----------|
| 2973 | 4 | F2-3 vs. M2-3 | 263410_at  | AT2G04039 | NdhV is loosely associated with the NDH complex and is required for stabilizing NDH subcomplexes A and E.<br>Encodes a xyloglucan endotransglycosylase/hydrolase. Protein sequence and phylogenetic analysis indicates that this enzyme resides in Group III-A of the XTH family, with high similarity to <i>Tropaeolum majus</i> (nasturtium) xyloglucanase 1 (TmNXG1). By sequence similarity to XTH31 (At3g44990) and in vivo analysis, likely to exhibit predominant xyloglucan endo-hydrolase activity (EC 3.2.1.151) with only limited potential to act as a xyloglucan endo-transglycosylase (EC 2.4.1.207). | 31.43  | 12.87  | 2.44 | 4.80E-04 | 4.01E-03 |
| 2974 | 4 | F2-3 vs. M2-3 | 263841_at  | AT2G36870 | Glutathione S-transferase family protein;(source:Araport11)                                                                                                                                                                                                                                                                                                                                                                                                                                                                                                                                                         | 99.95  | 41.05  | 2.43 | 2.34E-04 | 2.68E-03 |
| 2975 | 4 | F2-3 vs. M2-3 | 250967_at  | AT5G02790 | Uncharacterized protein family (UPF0497);(source:Araport11)                                                                                                                                                                                                                                                                                                                                                                                                                                                                                                                                                         | 68.14  | 28.05  | 2.43 | 1.57E-04 | 2.10E-03 |
| 2976 | 4 | F2-3 vs. M2-3 | 248140_at  | AT5G54980 | Pectin lyase-like superfamily protein;(source:Araport11)                                                                                                                                                                                                                                                                                                                                                                                                                                                                                                                                                            | 115.92 | 47.79  | 2.43 | 2.83E-04 | 3.01E-03 |
| 2977 | 4 | F2-3 vs. M2-3 | 265174_s_a | AT1G23460 | Encodes HopW1-1-Interacting protein 2 (WIN2). Interacts with the <i>P. syringae</i> effector HopW1-1. WIN2 has protein phosphatase activity. Modulates plant defenses against bacteria. Three WIN proteins are identified so far (WIN1: AT1G80600; WIN2: AT4G31750; WIN3: AT5G13320).                                                                                                                                                                                                                                                                                                                               | 24.73  | 10.21  | 2.42 | 3.18E-04 | 3.16E-03 |
| 2978 | 4 | F2-3 vs. M2-3 | 253512_at  | AT4G31750 | orotidine 5-phosphate decarboxylase;(source:Araport11)                                                                                                                                                                                                                                                                                                                                                                                                                                                                                                                                                              | 391.84 | 161.97 | 2.42 | 8.31E-04 | 5.52E-03 |
| 2979 | 4 | F2-3 vs. M2-3 | 264738_at  | AT1G62250 | Encodes a putative serine/threonine-specific protein kinase kin3. Protein is N-myristoylated. AtRabD2c encodes a Rab GTPase, which plays important roles in pollen development, germination and tube elongation.                                                                                                                                                                                                                                                                                                                                                                                                    | 79.02  | 32.81  | 2.41 | 6.72E-04 | 4.87E-03 |
| 2980 | 4 | F2-3 vs. M2-3 | 263419_at  | AT2G17220 | Endosomal targeting BRO1-like domain-containing protein;(source:Araport11)                                                                                                                                                                                                                                                                                                                                                                                                                                                                                                                                          | 38.49  | 16.03  | 2.40 | 4.38E-04 | 3.79E-03 |
| 2981 | 4 | F2-3 vs. M2-3 | 245299_at  | AT4G17530 | SKU5 similar 5;(source:Araport11)                                                                                                                                                                                                                                                                                                                                                                                                                                                                                                                                                                                   | 254.56 | 105.86 | 2.40 | 1.11E-04 | 1.71E-03 |
| 2982 | 4 | F2-3 vs. M2-3 | 245724_at  | AT1G73390 | Encodes a specialized sigma factor that functions in regulation of plastid genes and is responsible for the light-dependent transcription at the psbD LRP. Activation of SIG5 is dependent upon blue light and mediated by cryptochromes.                                                                                                                                                                                                                                                                                                                                                                           | 62.40  | 26.15  | 2.39 | 6.59E-04 | 4.82E-03 |
| 2983 | 4 | F2-3 vs. M2-3 | 261728_at  | AT1G76160 | Peptidase M20/M25/M40 family protein;(source:Araport11)                                                                                                                                                                                                                                                                                                                                                                                                                                                                                                                                                             | 103.19 | 43.35  | 2.38 | 5.70E-04 | 4.39E-03 |
| 2984 | 4 | F2-3 vs. M2-3 | 249769_at  | AT5G24120 | Encodes a protein-serine kinase that phosphorylates ribosomal protein in vitro. Activation of AtS6k is regulated by 1-naphthylacetic acid and kinetin, at least in part, via a lipid kinase-dependent pathway. Involved in translational up-regulation of ribosomal proteins. Phosphorylated by PDK1. Interacts with RAPTOR1, which in turn interacts with TOR. SPK6 activity is affected by osmotic stress, and plants overexpressing S6k1 are hypersensitive to osmotic stress. The gene is expressed in all tissues examined, with highest expression level detected in metabolically active tissues.            | 42.55  | 17.89  | 2.38 | 9.74E-04 | 6.09E-03 |
| 2985 | 4 | F2-3 vs. M2-3 | 261326_s_a | AT1G44820 | acetyl CoA:(Z)-3-hexen-1-ol acetyltransferase;(source:Araport11)                                                                                                                                                                                                                                                                                                                                                                                                                                                                                                                                                    | 53.21  | 22.53  | 2.36 | 1.04E-04 | 1.67E-03 |
| 2986 | 4 | F2-3 vs. M2-3 | 258677_at  | AT3G08730 | Encodes DRM3 (Domains Rearranged Methyltransferase3), a catalytically mutated paralog of the cytosine methyltransferase DRM2. Despite being catalytically mutated, DRM3 is required for normal maintenance of non-CG DNA methylation, establishment of RNA-directed DNA methylation triggered by repeat sequences and accumulation of repeat-associated small RNAs.                                                                                                                                                                                                                                                 | 20.46  | 8.67   | 2.36 | 3.21E-04 | 3.16E-03 |
| 2987 | 4 | F2-3 vs. M2-3 | 259054_at  | AT3G03480 | dihydrofolate reductase;(source:Araport11)                                                                                                                                                                                                                                                                                                                                                                                                                                                                                                                                                                          | 41.76  | 17.81  | 2.35 | 5.69E-04 | 4.39E-03 |
| 2988 | 4 | F2-3 vs. M2-3 | 258416_at  | AT3G17310 | Exostosin family protein;(source:Araport11)                                                                                                                                                                                                                                                                                                                                                                                                                                                                                                                                                                         | 55.65  | 23.77  | 2.34 | 5.09E-04 | 4.13E-03 |
| 2989 | 4 | F2-3 vs. M2-3 | 254158_at  | AT4G24380 | The gene encodes a gamma-glutamyltransferase (AKA gamma-glutamyl transpeptidase, EC 2.3.2.2) that is located in vascular tissues (predominantly phloem) of leaves and is involved in the degradation of glutathione. The encoded enzyme also mitigates oxidative stress by metabolizing GSSG (oxidized form of GSH - glutathione) in the apoplast.                                                                                                                                                                                                                                                                  | 118.61 | 50.82  | 2.33 | 7.74E-04 | 5.28E-03 |
| 2990 | 4 | F2-3 vs. M2-3 | 245619_at  | AT4G13990 | Regulator of chromosome condensation (RCC1) family protein;(source:Araport11)                                                                                                                                                                                                                                                                                                                                                                                                                                                                                                                                       | 55.03  | 23.75  | 2.32 | 1.41E-05 | 4.96E-04 |
| 2991 | 4 | F2-3 vs. M2-3 | 252906_at  | AT4G39640 | Encodes a protein that might have inorganic pyrophosphatase activity.                                                                                                                                                                                                                                                                                                                                                                                                                                                                                                                                               | 56.70  | 24.46  | 2.32 | 5.73E-05 | 1.19E-03 |
| 2992 | 4 | F2-3 vs. M2-3 | 258401_at  | AT3G15430 | Saposin-like aspartyl protease family protein;(source:Araport11)                                                                                                                                                                                                                                                                                                                                                                                                                                                                                                                                                    | 198.54 | 85.95  | 2.31 | 6.19E-04 | 4.61E-03 |
| 2993 | 4 | F2-3 vs. M2-3 | 255587_at  | AT4G01480 | PLANT CADMIUM RESISTANCE 1;(source:Araport11)                                                                                                                                                                                                                                                                                                                                                                                                                                                                                                                                                                       | 49.68  | 21.61  | 2.30 | 3.02E-04 | 3.07E-03 |
| 2994 | 4 | F2-3 vs. M2-3 | 255345_at  | AT4G04460 | Predicted to encode a PR (pathogenesis-related) protein. Belongs to the lipid transfer protein (PR-14) family with the following members: At2g38540/LTP1, At2g38530/LTP2, At5g59320/LTP3, At5g59310/LTP4, At3g51600/LTP5, At3g08770/LTP6, At2g15050/LTP7, At2g18370/LTP8, At2g15325/LTP9, At5g01870/LTP10, At4g33355/LTP11, At3g51590/LTP12, At5g44265/LTP13, At5g62065/LTP14, At4g08530/LTP15.                                                                                                                                                                                                                     | 30.87  | 13.42  | 2.30 | 2.14E-04 | 2.53E-03 |
| 2995 | 4 | F2-3 vs. M2-3 | 262832_s_a | AT1G14880 |                                                                                                                                                                                                                                                                                                                                                                                                                                                                                                                                                                                                                     | 28.80  | 12.60  | 2.29 | 6.73E-04 | 4.87E-03 |
| 2996 | 4 | F2-3 vs. M2-3 | 252115_at  | AT3G51600 |                                                                                                                                                                                                                                                                                                                                                                                                                                                                                                                                                                                                                     | 36.56  | 15.94  | 2.29 | 2.25E-05 | 6.85E-04 |

|      |   |               |                 |           |                                                                                                                                                                                                                                                                                                                                                                                                                                                                                                                                                                                                                                                                                          |         |        |      |          |          |
|------|---|---------------|-----------------|-----------|------------------------------------------------------------------------------------------------------------------------------------------------------------------------------------------------------------------------------------------------------------------------------------------------------------------------------------------------------------------------------------------------------------------------------------------------------------------------------------------------------------------------------------------------------------------------------------------------------------------------------------------------------------------------------------------|---------|--------|------|----------|----------|
| 2997 | 4 | F2-3 vs. M2-3 | 250259_at       | AT5G13800 | Encodes a pheophytinase that is involved in chlorophyll breakdown. Its transcript levels increase during senescence and pph-1 mutants have a stay-green phenotype.                                                                                                                                                                                                                                                                                                                                                                                                                                                                                                                       | 127.21  | 55.53  | 2.29 | 4.74E-05 | 1.07E-03 |
| 2998 | 4 | F2-3 vs. M2-3 | 256548_at       | AT3G14770 | Nodulin MtN3 family protein;(source:Araport11)                                                                                                                                                                                                                                                                                                                                                                                                                                                                                                                                                                                                                                           | 29.82   | 13.14  | 2.27 | 3.18E-04 | 3.16E-03 |
| 2999 | 4 | F2-3 vs. M2-3 | 256584_at       | AT3G28750 | hypothetical protein;(source:Araport11)<br>Encodes an aldehyde dehydrogenase induced by ABA and dehydration that can oxidize saturated aliphatic aldehydes. It is also able to oxidize beta-unsaturated aldehydes, but not aromatic aldehydes. Activity of ALDH3H1 is NAD +-dependent.                                                                                                                                                                                                                                                                                                                                                                                                   | 28.11   | 12.37  | 2.27 | 3.93E-04 | 3.54E-03 |
| 3000 | 4 | F2-3 vs. M2-3 | 245742_at       | AT1G44170 | member of YKT6 Gene Family                                                                                                                                                                                                                                                                                                                                                                                                                                                                                                                                                                                                                                                               | 54.92   | 24.35  | 2.26 | 1.61E-04 | 2.13E-03 |
| 3001 | 4 | F2-3 vs. M2-3 | 247852_at       | AT5G58060 |                                                                                                                                                                                                                                                                                                                                                                                                                                                                                                                                                                                                                                                                                          | 155.81  | 68.82  | 2.26 | 3.93E-04 | 3.54E-03 |
| 3002 | 4 | F2-3 vs. M2-3 | 251885_at       | AT3G54050 | Encodes a chloroplastic fructose 1,6-bisphosphate phosphatase. also known as HCEF1 (High Cyclic Electron Flow 1). hcef1 mutants have constitutively elevated electron flow (CEFI) and plants with antisense suppression of this enzyme have higher levels of net leaf photosynthesis and increased sucrose biosynthesis. The mRNA is cell-to-cell mobile.                                                                                                                                                                                                                                                                                                                                | 458.26  | 203.70 | 2.25 | 1.47E-04 | 2.00E-03 |
| 3003 | 4 | F2-3 vs. M2-3 | 267027_at       | AT2G38330 | MATE efflux family protein;(source:Araport11)                                                                                                                                                                                                                                                                                                                                                                                                                                                                                                                                                                                                                                            | 73.04   | 32.91  | 2.22 | 4.67E-04 | 3.94E-03 |
| 3004 | 4 | F2-3 vs. M2-3 | 257021_at       | AT3G19710 | Belongs to the branched-chain amino acid aminotransferase gene family. Encodes a methionine-oxo-acid transaminase. Involved in the methionine chain elongation pathway that leads to the ultimate biosynthesis of methionine-derived glucosinolates.                                                                                                                                                                                                                                                                                                                                                                                                                                     | 30.90   | 13.94  | 2.22 | 6.85E-04 | 4.92E-03 |
| 3005 | 4 | F2-3 vs. M2-3 | 251839_at       | AT3G54950 | Encodes pPLAIIb, a member of the Group 3 patatin-related phospholipases. pPLAIIb hydrolyzes phospholipids and galactolipids and additionally has acyl-CoA thioesterase activity. Alterations of pPLAIIb#946; result in changes in lipid levels and composition.                                                                                                                                                                                                                                                                                                                                                                                                                          | 69.88   | 31.52  | 2.22 | 5.91E-05 | 1.20E-03 |
| 3006 | 4 | F2-3 vs. M2-3 | 265415_at       | AT2G20890 | Chloroplast-localized Thylakoid formation1 gene product involved in vesicle-mediated formation of thylakoid membranes. Thf1 antisense lines contain abnormal chloroplasts early in leaf development (chloroplasts have loosely stacked thylakoid membranes). Expression was induced in the light and decreased under dark conditions. G-alpha interaction partner that functions downstream of the plasma membrane?delimited heterotrimeric G-protein (GPA1) in a D-glucose signaling pathway. Localized to both the outer plastid membrane and the stroma. Probably involved in the metabolic pathway that controls the assembly of the PS II complex. The mRNA is cell-to-cell mobile. | 506.71  | 229.39 | 2.21 | 1.10E-04 | 1.70E-03 |
| 3007 | 4 | F2-3 vs. M2-3 | 251197_at       | AT3G62960 | Encodes a member of the CC-type glutaredoxin (ROXY) family that has been shown to interact with the transcription factor TGA2.                                                                                                                                                                                                                                                                                                                                                                                                                                                                                                                                                           | 53.66   | 24.32  | 2.21 | 3.70E-04 | 3.44E-03 |
| 3008 | 4 | F2-3 vs. M2-3 | 254559_at       | AT4G19200 | proline-rich family protein;(source:Araport11)                                                                                                                                                                                                                                                                                                                                                                                                                                                                                                                                                                                                                                           | 131.18  | 59.32  | 2.21 | 8.34E-04 | 5.53E-03 |
| 3009 | 4 | F2-3 vs. M2-3 | 248126_at       | AT5G54760 | Translation initiation factor SU11 family protein;(source:Araport11)                                                                                                                                                                                                                                                                                                                                                                                                                                                                                                                                                                                                                     | 1909.80 | 862.74 | 2.21 | 1.56E-04 | 2.09E-03 |
| 3010 | 4 | F2-3 vs. M2-3 | 261623_at       | AT1G01980 | Encodes an oligogalacturonide oxidase that inactivates the elicitor-active oligogalacturonides (OGs).                                                                                                                                                                                                                                                                                                                                                                                                                                                                                                                                                                                    | 24.57   | 11.18  | 2.20 | 2.37E-04 | 2.71E-03 |
| 3011 | 4 | F2-3 vs. M2-3 | 267531_at       | AT2G41860 | member of Calcium Dependent Protein Kinase                                                                                                                                                                                                                                                                                                                                                                                                                                                                                                                                                                                                                                               | 21.30   | 9.67   | 2.20 | 1.19E-04 | 1.78E-03 |
| 3012 | 4 | F2-3 vs. M2-3 | 267214_at       | AT2G43970 | RNA-binding protein;(source:Araport11)<br>mRNA level of the MEB5.2 gene (At3g17800) remains unchanged after cutting the inflorescence stem                                                                                                                                                                                                                                                                                                                                                                                                                                                                                                                                               | 123.01  | 55.95  | 2.20 | 9.16E-04 | 5.86E-03 |
| 3013 | 4 | F2-3 vs. M2-3 | 258188_at       | AT3G17800 | encodes periredoxin Q which decomposes peroxides and plays a role in the protection of the photosynthetic apparatus                                                                                                                                                                                                                                                                                                                                                                                                                                                                                                                                                                      | 189.66  | 86.18  | 2.20 | 4.61E-04 | 3.92E-03 |
| 3014 | 4 | F2-3 vs. M2-3 | 258087_at       | AT3G26060 |                                                                                                                                                                                                                                                                                                                                                                                                                                                                                                                                                                                                                                                                                          | 135.40  | 61.68  | 2.20 | 2.36E-04 | 2.70E-03 |
| 3015 | 4 | F2-3 vs. M2-3 | 252213_at       | AT3G50210 | 2-oxoglutarate (2OG) and Fe(II)-dependent oxygenase superfamily protein;(source:Araport11)                                                                                                                                                                                                                                                                                                                                                                                                                                                                                                                                                                                               | 208.81  | 94.73  | 2.20 | 3.79E-04 | 3.48E-03 |
| 3016 | 4 | F2-3 vs. M2-3 | 254137_at       | AT4G24930 | thylakoid lumenal 17.9 kDa protein, chloroplast;(source:Araport11)                                                                                                                                                                                                                                                                                                                                                                                                                                                                                                                                                                                                                       | 34.82   | 15.80  | 2.20 | 7.46E-04 | 5.16E-03 |
| 3017 | 4 | F2-3 vs. M2-3 | 254103_at       | AT4G25030 | Plastid localized protein of unknown function. Mutants are more susceptible to P. syringae and produce less callose upon infection.                                                                                                                                                                                                                                                                                                                                                                                                                                                                                                                                                      | 129.84  | 59.19  | 2.19 | 3.73E-04 | 3.45E-03 |
| 3018 | 4 | F2-3 vs. M2-3 | 252933_at       | AT4G39110 | bups1 and bups1/2 double mutants have reduced fertility due to premature rupture of pollen tubes before they reach the ovule. BUSP1 interacts with RALF4/19 peptide ligands and ANX1/2 receptors. BUPS/ANX signaling may regulate and promote pollen tube growth.                                                                                                                                                                                                                                                                                                                                                                                                                        | 32.77   | 15.07  | 2.17 | 2.29E-05 | 6.86E-04 |
| 3019 | 4 | F2-3 vs. M2-3 | 246673_at       | AT5G30510 | ribosomal protein S1;(source:Araport11)                                                                                                                                                                                                                                                                                                                                                                                                                                                                                                                                                                                                                                                  | 1638.25 | 758.85 | 2.16 | 6.02E-05 | 1.21E-03 |
| 3020 | 4 | F2-3 vs. M2-3 | 258359_s_a<br>t | AT3G14420 | Encodes a glycolate oxidase that modulates reactive oxygen species-mediated signal transduction during nonhost resistance. The mRNA is cell-to-cell mobile.                                                                                                                                                                                                                                                                                                                                                                                                                                                                                                                              | 60.47   | 28.22  | 2.14 | 3.57E-04 | 3.36E-03 |
| 3021 | 4 | F2-3 vs. M2-3 | 247741_at       | AT5G58960 | Mutant plants display impaired light-regulation of the hypocotyl randomization response.                                                                                                                                                                                                                                                                                                                                                                                                                                                                                                                                                                                                 | 934.66  | 436.02 | 2.14 | 6.89E-04 | 4.93E-03 |



|      |   |               |           |           |                                                                                                                                                                                                                                                                                                                                                                                                                                                                                                                                                                                                                             |        |        |      |          |          |
|------|---|---------------|-----------|-----------|-----------------------------------------------------------------------------------------------------------------------------------------------------------------------------------------------------------------------------------------------------------------------------------------------------------------------------------------------------------------------------------------------------------------------------------------------------------------------------------------------------------------------------------------------------------------------------------------------------------------------------|--------|--------|------|----------|----------|
|      |   |               |           |           | Member of actin subclass composed of ACT12 and ACT4. RNA is expressed at very low levels in vegetative organs, low levels in flowers and very high levels in pollen. Expression of an ACT12/GUS fusion was found in vascular tissues, tapetum, developing and mature pollen, the root cap and in a ring of pericycle tissues during lateral root initiation and early development.                                                                                                                                                                                                                                          |        |        |      |          |          |
| 3022 | 4 | F2-3 vs. M2-3 | 252531_at | AT3G46520 | member of Alpha-Expansin Gene Family. Naming convention from the Expansin Working Group (Kende et al, 2004. Plant Mol Bio)                                                                                                                                                                                                                                                                                                                                                                                                                                                                                                  | 31.19  | 14.64  | 2.13 | 1.77E-04 | 2.25E-03 |
| 3023 | 4 | F2-3 vs. M2-3 | 261226_at | AT1G20190 | Encodes the electron transfer flavoprotein ETF alpha, a putative subunit of the mitochondrial electron transfer flavoprotein complex (ETF beta is At5g43430.1) in Arabidopsis. Mutations of the ETF beta gene results in accelerated senescence and early death compared to wild-type during extended darkness.                                                                                                                                                                                                                                                                                                             | 44.05  | 20.80  | 2.12 | 7.06E-04 | 4.99E-03 |
| 3024 | 4 | F2-3 vs. M2-3 | 256209_at | AT1G50940 | Encodes glycine decarboxylase complex H protein. Involved in photorespiration. The mRNA is cell-to-cell mobile.                                                                                                                                                                                                                                                                                                                                                                                                                                                                                                             | 52.66  | 24.84  | 2.12 | 3.34E-04 | 3.25E-03 |
| 3025 | 4 | F2-3 vs. M2-3 | 266636_at | AT2G35370 | Encodes a cytochrome p450 monooxygenase. Overexpression of this gene allows fruit growth independently of fertilization. The gene is normally expressed only in floral organs(during the Arabidopsis stage 14 flower) and in the funiculus at anthesis.                                                                                                                                                                                                                                                                                                                                                                     | 45.37  | 21.40  | 2.12 | 4.19E-04 | 3.69E-03 |
| 3026 | 4 | F2-3 vs. M2-3 | 251301_at | AT3G61880 | magnesium transporter, putative (DUF803);(source:Araport11)                                                                                                                                                                                                                                                                                                                                                                                                                                                                                                                                                                 | 43.81  | 20.64  | 2.12 | 3.88E-04 | 3.54E-03 |
| 3027 | 4 | F2-3 vs. M2-3 | 250347_at | AT5G11960 | sucrose-phosphatase 1;(source:Araport11)                                                                                                                                                                                                                                                                                                                                                                                                                                                                                                                                                                                    | 125.11 | 58.93  | 2.12 | 2.47E-04 | 2.79E-03 |
| 3028 | 4 | F2-3 vs. M2-3 | 260517_at | AT1G51420 | evolutionarily conserved C-terminal region 8;(source:Araport11)                                                                                                                                                                                                                                                                                                                                                                                                                                                                                                                                                             | 54.29  | 25.89  | 2.10 | 5.94E-04 | 4.49E-03 |
| 3029 | 4 | F2-3 vs. M2-3 | 264102_at | AT1G79270 | ferritin 2;(source:Araport11)                                                                                                                                                                                                                                                                                                                                                                                                                                                                                                                                                                                               | 20.37  | 9.68   | 2.10 | 6.39E-05 | 1.23E-03 |
| 3030 | 4 | F2-3 vs. M2-3 | 256416_at | AT3G11050 | Encodes a subunit of the mitochondrial pyruvate dehydrogenase complex.                                                                                                                                                                                                                                                                                                                                                                                                                                                                                                                                                      | 145.03 | 69.23  | 2.10 | 5.53E-04 | 4.35E-03 |
| 3031 | 4 | F2-3 vs. M2-3 | 258208_at | AT3G13930 |                                                                                                                                                                                                                                                                                                                                                                                                                                                                                                                                                                                                                             | 202.71 | 96.44  | 2.10 | 4.11E-04 | 3.65E-03 |
|      |   |               |           |           | Encodes NRT1.1 (CHL1), a dual-affinity nitrate transporter. The protein is expressed in guard cells and function in stomatal opening. Mutants have less transpiration and are more tolerant to drought. Expressed in lateral roots. Involved in nitrate signaling which enables the plant root system to detect and exploit nitrate-rich soil patches. Comparing to the wild type, the mutant displays a strongly decreased lateral root proliferation phenotype in nitrate rich patches on growth medium. Affects flowering time via interaction with the FLC dependent flowering pathway to influence its target gene FT. |        |        |      |          |          |
| 3032 | 4 | F2-3 vs. M2-3 | 264348_at | AT1G12110 | Arabidopsis thaliana aldehyde dehydrogenase AtALDH1a mRNA. a sinapaldehyde dehydrogenase catalyzes both the oxidation of coniferylaldehyde and sinapaldehyde forming ferulic acid and sinapic acid, respectively                                                                                                                                                                                                                                                                                                                                                                                                            | 84.38  | 40.55  | 2.08 | 1.88E-05 | 6.16E-04 |
| 3033 | 4 | F2-3 vs. M2-3 | 258140_at | AT3G24503 | Encodes NRGA1, a putative mitochondrial pyruvate carrier that mediates ABA regulation of guard cell ion channels and drought stress responses.                                                                                                                                                                                                                                                                                                                                                                                                                                                                              | 385.20 | 185.30 | 2.08 | 6.98E-04 | 4.97E-03 |
| 3034 | 4 | F2-3 vs. M2-3 | 255243_at | AT4G05590 |                                                                                                                                                                                                                                                                                                                                                                                                                                                                                                                                                                                                                             | 26.22  | 12.59  | 2.08 | 1.74E-04 | 2.23E-03 |
| 3035 | 4 | F2-3 vs. M2-3 | 263705_at | AT1G31190 | Encodes a myo-inositol monophosphatase IMPL1 (myo-Inositol monophosphatase like 1).                                                                                                                                                                                                                                                                                                                                                                                                                                                                                                                                         | 281.55 | 135.78 | 2.07 | 1.91E-04 | 2.34E-03 |
| 3036 | 4 | F2-3 vs. M2-3 | 255855_at | AT1G66950 | Encodes a plasma membrane-localized ABC transporter. Confers tolerance to herbicide paraquat.                                                                                                                                                                                                                                                                                                                                                                                                                                                                                                                               | 27.74  | 13.49  | 2.06 | 8.05E-04 | 5.40E-03 |
| 3037 | 4 | F2-3 vs. M2-3 | 254683_at | AT4G13800 | magnesium transporter NIPA (DUF803);(source:Araport11)                                                                                                                                                                                                                                                                                                                                                                                                                                                                                                                                                                      | 24.33  | 11.80  | 2.06 | 2.42E-04 | 2.74E-03 |
| 3038 | 4 | F2-3 vs. M2-3 | 247523_at | AT5G61410 | Arabidopsis thaliana ribulose-5-phosphate-3-epimerase mRNA                                                                                                                                                                                                                                                                                                                                                                                                                                                                                                                                                                  | 323.40 | 156.68 | 2.06 | 3.00E-05 | 8.22E-04 |
| 3039 | 4 | F2-3 vs. M2-3 | 257375_at | AT2G38640 | LURP-one-like protein (DUF567);(source:Araport11)                                                                                                                                                                                                                                                                                                                                                                                                                                                                                                                                                                           | 19.33  | 9.44   | 2.05 | 3.72E-05 | 9.26E-04 |
| 3040 | 4 | F2-3 vs. M2-3 | 257701_at | AT3G12710 | DNA glycosylase superfamily protein;(source:Araport11)                                                                                                                                                                                                                                                                                                                                                                                                                                                                                                                                                                      | 40.44  | 19.74  | 2.05 | 5.24E-04 | 4.20E-03 |
|      |   |               |           |           | VAR1 contains a conserved motif for ATPase and a metalloprotease characteristic to FtsH proteins, and is targeted into chloroplasts. A VAR1-fusion protein synthesized in vitro exhibited ATPase activity and partial metalloprotease activity. This protein is located to the thylakoid membrane and forms a complex with VAR2. FtsH1 (VAR1) and FtsH5 are interchangeable in thylakoid membranes. Phosphorylation of this protein is dependent on calcium. The mRNA is cell-to-cell mobile.                                                                                                                               |        |        |      |          |          |
| 3041 | 4 | F2-3 vs. M2-3 | 249244_at | AT5G42270 | OBP32pep, putative (DUF220);(source:Araport11)                                                                                                                                                                                                                                                                                                                                                                                                                                                                                                                                                                              | 365.62 | 178.87 | 2.04 | 1.68E-04 | 2.20E-03 |
| 3042 | 4 | F2-3 vs. M2-3 | 260304_at | AT1G70480 |                                                                                                                                                                                                                                                                                                                                                                                                                                                                                                                                                                                                                             | 162.78 | 80.18  | 2.03 | 1.87E-04 | 2.31E-03 |
|      |   |               |           |           | required for regulated cell expansion and normal root hair development. Encodes an evolutionarily conserved protein with putative GTP-binding motifs that is implicated in the control of vesicle trafficking between the endoplasmic reticulum and the Golgi compartments.                                                                                                                                                                                                                                                                                                                                                 |        |        |      |          |          |
| 3043 | 4 | F2-3 vs. M2-3 | 257606_at | AT3G13870 |                                                                                                                                                                                                                                                                                                                                                                                                                                                                                                                                                                                                                             | 127.56 | 62.79  | 2.03 | 1.69E-04 | 2.20E-03 |

|      |   |               |                 |           |                                                                                                                                                                                                                                                                                                                                                                                                                                                                                                                           |         |         |      |          |          |
|------|---|---------------|-----------------|-----------|---------------------------------------------------------------------------------------------------------------------------------------------------------------------------------------------------------------------------------------------------------------------------------------------------------------------------------------------------------------------------------------------------------------------------------------------------------------------------------------------------------------------------|---------|---------|------|----------|----------|
| 3044 | 4 | F2-3 vs. M2-3 | 258054_at       | AT3G16240 | Delta tonoplast intrinsic protein, functions as a water channel and ammonium (NH <sub>3</sub> ) transporter. Highly expressed in flower, shoot, and stem. Expression shows diurnal regulation and is induced by ammonium (NH <sub>3</sub> ). Protein localized to vacuolar membrane. The mRNA is cell-to-cell mobile. Immunoglobulin E-set superfamily protein;(source:Araport11)                                                                                                                                         | 164.44  | 81.06   | 2.03 | 4.95E-04 | 4.10E-03 |
| 3045 | 4 | F2-3 vs. M2-3 | 264395_at       | AT1G12070 |                                                                                                                                                                                                                                                                                                                                                                                                                                                                                                                           | 23.10   | 11.45   | 2.02 | 2.27E-04 | 2.64E-03 |
| 3046 | 4 | F2-3 vs. M2-3 | 261373_at       | AT1G53000 | Encodes a mitochondrial-localized CMP-KDO (3-deoxy-D-manno-octulosonate) synthetase. This is the enzyme activating KDO as a nucleotide sugar prior to its incorporation into rhamnogalacturonan-II. Heterozygous mutants are defective in pollen development and in pollen tube elongation.                                                                                                                                                                                                                               | 100.67  | 49.77   | 2.02 | 2.33E-04 | 2.68E-03 |
| 3047 | 4 | F2-3 vs. M2-3 | 260080_at       | AT1G78160 | Encodes a member of the Arabidopsis Pumilio (APUM) proteins containing PUF domain (eight repeats of approximately 36 amino acids each). PUF proteins regulate both mRNA stability and translation through sequence-specific binding to the 3' UTR of target mRNA transcripts. Purple acid phosphatases superfamily protein;(source:Araport11)                                                                                                                                                                             | 29.06   | 14.42   | 2.02 | 9.35E-05 | 1.54E-03 |
| 3048 | 4 | F2-3 vs. M2-3 | 252004_at       | AT3G52780 |                                                                                                                                                                                                                                                                                                                                                                                                                                                                                                                           | 121.24  | 60.02   | 2.02 | 1.81E-04 | 2.29E-03 |
| 3049 | 4 | F2-3 vs. M2-3 | 252331_s_a<br>t | AT3G48780 | Encodes one of the two LCB2 subunits (LCB2a and LCB2b) of serine palmitoyltransferase, an enzyme involved in sphingolipid biosynthesis. LCB2a and LCB2b are functional redundant. Double mutants are gametophytic lethal. The mRNA is cell-to-cell mobile.                                                                                                                                                                                                                                                                | 104.72  | 52.09   | 2.01 | 7.10E-04 | 4.99E-03 |
| 3050 | 4 | F2-3 vs. M2-3 | 252058_at       | AT3G52470 | Late embryogenesis abundant (LEA) hydroxyproline-rich glycoprotein family;(source:Araport11) member of NAP family, an heterogeneous subfamily of the ATP-binding Cassette (ABC) superfamily of membrane transporters. The NAPs proteins are characterized by having only one nucleotide-binding folds (NBFs) domain.                                                                                                                                                                                                      | 174.04  | 86.39   | 2.01 | 4.08E-04 | 3.64E-03 |
| 3051 | 4 | F2-3 vs. M2-3 | 265043_at       | AT1G03900 | Type I phosphatidylinositol-4-phosphate 5-kinase. Preferentially phosphorylates PtdIns4P. Induced by water stress and abscisic acid in Arabidopsis thaliana. Expressed in procambial cells of leaves, flowers and roots. A N-terminal Membrane Occupation and Recognition Nexus (MORN)affects enzyme activity and distribution.                                                                                                                                                                                           | 280.38  | 140.48  | 2.00 | 9.09E-04 | 5.84E-03 |
| 3052 | 4 | F2-3 vs. M2-3 | 255959_at       | AT1G21980 | encodes a major leaf ferredoxin                                                                                                                                                                                                                                                                                                                                                                                                                                                                                           | 30.26   | 15.12   | 2.00 | 6.55E-04 | 4.80E-03 |
| 3053 | 4 | F2-3 vs. M2-3 | 259727_at       | AT1G60950 |                                                                                                                                                                                                                                                                                                                                                                                                                                                                                                                           | 3805.93 | 1907.38 | 2.00 | 9.15E-05 | 1.52E-03 |
| 3054 | 4 | F2-3 vs. M2-3 | 251961_at       | AT3G53620 | Encodes a soluble protein with inorganic pyrophosphatase activity that is highly specific for Mg-inorganic pyrophosphate. The mRNA is cell-to-cell mobile.                                                                                                                                                                                                                                                                                                                                                                | 222.57  | 111.11  | 2.00 | 3.89E-04 | 3.54E-03 |
| 3055 | 4 | F2-3 vs. M2-3 | 253372_at       | AT4G33220 | pectin methylesterase 44;(source:Araport11)                                                                                                                                                                                                                                                                                                                                                                                                                                                                               | 245.25  | 122.80  | 2.00 | 6.95E-04 | 4.96E-03 |
| 3056 | 4 | F2-3 vs. M2-3 | 250137_at       | AT5G15390 | tRNA/rRNA methyltransferase (SpoU) family protein;(source:Araport11)                                                                                                                                                                                                                                                                                                                                                                                                                                                      | 103.60  | 51.74   | 2.00 | 8.08E-05 | 1.40E-03 |
| 3057 | 4 | F2-3 vs. M2-3 | 257407_at       | AT1G27100 | Actin cross-linking protein;(source:Araport11)                                                                                                                                                                                                                                                                                                                                                                                                                                                                            | 183.50  | 92.40   | 1.99 | 5.59E-04 | 4.37E-03 |
| 3058 | 4 | F2-3 vs. M2-3 | 257790_at       | AT3G27090 | DCD (Development and Cell Death) domain protein;(source:Araport11)                                                                                                                                                                                                                                                                                                                                                                                                                                                        | 398.82  | 200.57  | 1.99 | 7.42E-04 | 5.15E-03 |
| 3059 | 4 | F2-3 vs. M2-3 | 247539_at       | AT5G61710 | cotton fiber protein;(source:Araport11)                                                                                                                                                                                                                                                                                                                                                                                                                                                                                   | 28.49   | 14.36   | 1.98 | 9.08E-04 | 5.84E-03 |
| 3060 | 4 | F2-3 vs. M2-3 | 257253_at       | AT3G24190 | Protein kinase superfamily protein;(source:Araport11)                                                                                                                                                                                                                                                                                                                                                                                                                                                                     | 63.28   | 32.11   | 1.97 | 5.56E-04 | 4.36E-03 |
| 3061 | 4 | F2-3 vs. M2-3 | 250827_at       | AT5G05170 | Encodes a cellulose synthase isomer. CESA3 mutants have cellulose defect in the primary cell wall. Multiple lines of evidence suggest that CESA3, along with CESA1 and CESA6 are present in the same plasma membrane complex for cellulose biosynthesis. As inferred from the null role of secondary wall-type CesAs, included in a set of five primary wall-type CesAs that may support trichome cell wall thickening. The xylem cells in primary root have reduced cell expansion and higher than normal lignification. | 1253.06 | 635.76  | 1.97 | 9.76E-04 | 6.09E-03 |
| 3062 | 4 | F2-3 vs. M2-3 | 256093_at       | AT1G20823 | Encodes a RING E3 ubiquitin ligase ATL80. Involved in phosphate mobilization and cold stress response in sufficient phosphate growth conditions. The mRNA is cell-to-cell mobile. kinase with tetratricopeptide repeat domain-containing protein;(source:Araport11)                                                                                                                                                                                                                                                       | 38.21   | 19.48   | 1.96 | 3.03E-04 | 3.07E-03 |
| 3063 | 4 | F2-3 vs. M2-3 | 256213_at       | AT1G50990 |                                                                                                                                                                                                                                                                                                                                                                                                                                                                                                                           | 22.62   | 11.62   | 1.95 | 5.15E-04 | 4.16E-03 |
| 3064 | 4 | F2-3 vs. M2-3 | 249343_at       | AT5G40650 | One of three isoforms of the iron-sulfur component of the succinate dehydrogenase complex, a component of the mitochondrial respiratory chain complex II. The product of the nuclear encoded gene is imported into the mitochondrion. Expressed during germination and post-germinative growth.                                                                                                                                                                                                                           | 1204.09 | 617.88  | 1.95 | 1.79E-04 | 2.27E-03 |
| 3065 | 4 | F2-3 vs. M2-3 | 265400_at       | AT2G10940 | Bifunctional inhibitor/lipid-transfer protein/seed storage 2S albumin superfamily protein;(source:Araport11)                                                                                                                                                                                                                                                                                                                                                                                                              | 144.90  | 74.70   | 1.94 | 4.05E-04 | 3.62E-03 |
| 3066 | 4 | F2-3 vs. M2-3 | 260789_s_a      | AT3G06690 | putative acyl-coenzyme A oxidase;(source:Araport11)                                                                                                                                                                                                                                                                                                                                                                                                                                                                       | 32.73   | 16.92   | 1.93 | 1.94E-04 | 2.36E-03 |
| 3067 | 4 | F2-3 vs. M2-3 | 249447_at       | AT5G39400 | Calcium/lipid-binding (CaLB) phosphatase;(source:Araport11)                                                                                                                                                                                                                                                                                                                                                                                                                                                               | 24.19   | 12.54   | 1.93 | 2.54E-04 | 2.84E-03 |

|      |   |               |           |           |                                                                                                                                                                                                                                                                                                                                                                                                                                                                                                                    |        |        |      |          |          |
|------|---|---------------|-----------|-----------|--------------------------------------------------------------------------------------------------------------------------------------------------------------------------------------------------------------------------------------------------------------------------------------------------------------------------------------------------------------------------------------------------------------------------------------------------------------------------------------------------------------------|--------|--------|------|----------|----------|
|      |   |               |           |           | Encodes a cytosolic ascorbate peroxidase APX6. Ascorbate peroxidases are enzymes that scavenge hydrogen peroxide in plant cells. Eight types of APX have been described for Arabidopsis: three cytosolic (APX1, APX2, APX6), two chloroplastic types (stromal sAPX, thylakoid tAPX), and three microsomal (APX3, APX4, APX5) isoforms.                                                                                                                                                                             | 117.62 | 61.11  | 1.92 | 6.30E-06 | 2.98E-04 |
| 3068 | 4 | F2-3 vs. M2-3 | 253477_at | AT4G32320 | RHOMBOLD-like protein 3;(source:Araport11)                                                                                                                                                                                                                                                                                                                                                                                                                                                                         | 164.77 | 85.67  | 1.92 | 1.52E-05 | 5.28E-04 |
| 3069 | 4 | F2-3 vs. M2-3 | 250621_at | AT5G07250 |                                                                                                                                                                                                                                                                                                                                                                                                                                                                                                                    |        |        |      |          |          |
|      |   |               |           |           | A member of ARF GTPase family. A thaliana has 21 members of this family, known to be essential for vesicle coating and uncoating and functions in GTP-binding. Gene encoding ADP-ribosylation factor and similar to other ARFs and ARF-like proteins. The gene is shown to play a role in cell division, cell expansion and cellulose production using antisense construct.                                                                                                                                        | 107.12 | 56.10  | 1.91 | 6.17E-04 | 4.60E-03 |
| 3070 | 4 | F2-3 vs. M2-3 | 260305_at | AT1G70490 | UDP-galactose transporter 6;(source:Araport11)                                                                                                                                                                                                                                                                                                                                                                                                                                                                     | 66.09  | 34.56  | 1.91 | 8.45E-05 | 1.44E-03 |
| 3071 | 4 | F2-3 vs. M2-3 | 251465_at | AT3G59360 | NAD(P)H dehydrogenase B3;(source:Araport11)                                                                                                                                                                                                                                                                                                                                                                                                                                                                        | 40.37  | 21.12  | 1.91 | 8.27E-04 | 5.50E-03 |
| 3072 | 4 | F2-3 vs. M2-3 | 254419_at | AT4G21490 | serine carboxypeptidase-like 35;(source:Araport11)                                                                                                                                                                                                                                                                                                                                                                                                                                                                 | 48.43  | 25.41  | 1.91 | 5.33E-04 | 4.25E-03 |
| 3073 | 4 | F2-3 vs. M2-3 | 250517_at | AT5G08260 | from the Czech roh meaning corner;(source:Araport11)                                                                                                                                                                                                                                                                                                                                                                                                                                                               | 73.76  | 38.92  | 1.90 | 1.32E-04 | 1.89E-03 |
| 3074 | 4 | F2-3 vs. M2-3 | 260320_at | AT1G63930 |                                                                                                                                                                                                                                                                                                                                                                                                                                                                                                                    |        |        |      |          |          |
| 3075 | 4 | F2-3 vs. M2-3 | 251854_at | AT3G54800 | Pleckstrin homology (PH) and lipid-binding START domains-containing protein;(source:Araport11)                                                                                                                                                                                                                                                                                                                                                                                                                     | 21.09  | 11.09  | 1.90 | 8.93E-04 | 5.77E-03 |
| 3076 | 4 | F2-3 vs. M2-3 | 259464_at | AT1G18990 | myosin-binding protein, putative (Protein of unknown function, DUF593);(source:Araport11)                                                                                                                                                                                                                                                                                                                                                                                                                          | 18.41  | 9.75   | 1.89 | 9.80E-04 | 6.11E-03 |
|      |   |               |           |           | Encodes MCP2d, the predominant and constitutively expressed member of type II metacaspases (MCPs). MCP2d plays a positive regulatory role in biotic and abiotic stress-induced programmed cell death (PCD). Arabidopsis contains three type I MCP genes (MCP1a-c) and six type II MCP genes (MCP2a-f): AtMCP1a/At5g64240, AtMCP1b/At1g02170, AtMCP1c/At4g25110, AtMCP2a/At1g79310, AtMCP2b/At1g79330, AtMCP2c/At1g79320, AtMCP2d/At1g79340, AtMCP2e/At1g16420, AtMCP2f/At5g04200. The mRNA is cell-to-cell mobile. | 62.58  | 33.05  | 1.89 | 9.17E-04 | 5.86E-03 |
| 3077 | 4 | F2-3 vs. M2-3 | 264120_at | AT1G79340 | V-ATPase G-subunit like protein                                                                                                                                                                                                                                                                                                                                                                                                                                                                                    | 18.23  | 9.65   | 1.89 | 9.11E-04 | 5.84E-03 |
| 3078 | 4 | F2-3 vs. M2-3 | 254033_at | AT4G25950 | rhomboid family protein;(source:Araport11)                                                                                                                                                                                                                                                                                                                                                                                                                                                                         | 181.36 | 95.98  | 1.89 | 1.07E-05 | 4.16E-04 |
| 3079 | 4 | F2-3 vs. M2-3 | 250330_at | AT5G11810 |                                                                                                                                                                                                                                                                                                                                                                                                                                                                                                                    |        |        |      |          |          |
|      |   |               |           |           | BNQ2 belongs to a family of atypical non-DNA binding basic helix-loop-helix (bHLH) proteins that heterodimerize with and negatively regulate bHLH transcription factors. Directly and negatively regulated by AP3 and PI in petals. Required for appropriate regulation of flowering time.                                                                                                                                                                                                                         | 19.49  | 10.30  | 1.89 | 8.80E-04 | 5.72E-03 |
| 3080 | 4 | F2-3 vs. M2-3 | 250155_at | AT5G15160 | Encodes a class XI myosin that is involved in organelle motility, actin organization, and optimal growth of pollen tubes.                                                                                                                                                                                                                                                                                                                                                                                          | 35.33  | 18.76  | 1.88 | 5.03E-04 | 4.10E-03 |
| 3081 | 4 | F2-3 vs. M2-3 | 264235_at | AT1G54560 | vacuolar ATP synthase subunit D (VATD) / V-ATPase D subunit / vacuolar proton pump D subunit (VATPD);(source:Araport11)                                                                                                                                                                                                                                                                                                                                                                                            | 160.14 | 84.97  | 1.88 | 6.00E-07 | 7.44E-05 |
| 3082 | 4 | F2-3 vs. M2-3 | 251557_at | AT3G58730 | Pathogenesis-related thaumatin superfamily protein;(source:Araport11)                                                                                                                                                                                                                                                                                                                                                                                                                                              | 34.12  | 18.27  | 1.87 | 3.06E-04 | 3.07E-03 |
| 3083 | 4 | F2-3 vs. M2-3 | 262727_at | AT1G75800 | AGC (cAMP-dependent, cGMP-dependent and protein kinase C) kinase family protein;(source:Araport11)                                                                                                                                                                                                                                                                                                                                                                                                                 | 54.12  | 29.04  | 1.86 | 1.18E-04 | 1.77E-03 |
| 3084 | 4 | F2-3 vs. M2-3 | 263368_at | AT2G20470 | Late embryogenesis abundant protein, group 2;(source:Araport11)                                                                                                                                                                                                                                                                                                                                                                                                                                                    | 456.51 | 244.99 | 1.86 | 5.35E-04 | 4.26E-03 |
| 3085 | 4 | F2-3 vs. M2-3 | 267212_at | AT2G44060 | ABC-2 type transporter family protein;(source:Araport11)                                                                                                                                                                                                                                                                                                                                                                                                                                                           | 25.92  | 13.91  | 1.86 | 1.74E-04 | 2.23E-03 |
| 3086 | 4 | F2-3 vs. M2-3 | 251825_at | AT3G55100 |                                                                                                                                                                                                                                                                                                                                                                                                                                                                                                                    |        |        |      |          |          |
| 3087 | 4 | F2-3 vs. M2-3 | 253525_at | AT4G31330 | transmembrane protein, putative (Protein of unknown function, DUF599);(source:Araport11)                                                                                                                                                                                                                                                                                                                                                                                                                           | 27.53  | 14.87  | 1.85 | 2.00E-06 | 1.53E-04 |
|      |   |               |           |           | Encodes a homoserine kinase (HSK) which produces O-phospho-L-homoserine (HserP), a compound at the branching point of methionine and threonine biosynthesis. HSK is found in the stromal fraction of chloroplasts. Mutation of this gene results in higher level of the amino acid homoserine and resistance to downy mildew pathogen Hyaloperonospora arabidopsidis.                                                                                                                                              | 122.42 | 66.43  | 1.84 | 2.55E-04 | 2.84E-03 |
| 3088 | 4 | F2-3 vs. M2-3 | 264855_at | AT2G17265 |                                                                                                                                                                                                                                                                                                                                                                                                                                                                                                                    |        |        |      |          |          |
|      |   |               |           |           | A member of the plasma membrane intrinsic protein subfamily PIP2. When expressed in yeast cells can conduct hydrogen peroxide into those cells. Mutants exhibit longer root hairs.                                                                                                                                                                                                                                                                                                                                 | 75.91  | 41.17  | 1.84 | 2.71E-04 | 2.95E-03 |
| 3089 | 4 | F2-3 vs. M2-3 | 247586_at | AT5G60660 | Phosphoglycerate mutase family protein;(source:Araport11)                                                                                                                                                                                                                                                                                                                                                                                                                                                          | 35.62  | 19.47  | 1.83 | 3.46E-04 | 3.30E-03 |
| 3090 | 4 | F2-3 vs. M2-3 | 264645_at | AT1G08940 | ATP phosphoribosyl transferase, catalyses first step of histidine biosynthesis                                                                                                                                                                                                                                                                                                                                                                                                                                     | 108.14 | 58.98  | 1.83 | 2.51E-04 | 2.82E-03 |
| 3091 | 4 | F2-3 vs. M2-3 | 245867_at | AT1G58080 |                                                                                                                                                                                                                                                                                                                                                                                                                                                                                                                    |        |        |      |          |          |

|      |   |               |           |           |                                                                                                                                                                                                                                                                                                                                                                                                                                                                                                              |         |        |      |          |          |
|------|---|---------------|-----------|-----------|--------------------------------------------------------------------------------------------------------------------------------------------------------------------------------------------------------------------------------------------------------------------------------------------------------------------------------------------------------------------------------------------------------------------------------------------------------------------------------------------------------------|---------|--------|------|----------|----------|
| 3092 | 4 | F2-3 vs. M2-3 | 266165_at | AT2G28190 | Encodes a chloroplastic copper/zinc superoxide dismutase CSD2 that can detoxify superoxide radicals. Its expression is affected by miR398-directed mRNA cleavage. Activation depends totally on CCS. Overexpression of a miR398-resistant form of CSD2 leads to more dramatic improvements in stress (high light, Cu2+ and methyl viologen) tolerance than overexpression of wild-type CSD2. The mRNA is cell-to-cell mobile.                                                                                | 1340.29 | 731.95 | 1.83 | 4.14E-04 | 3.66E-03 |
| 3093 | 4 | F2-3 vs. M2-3 | 251383_at | AT3G60740 | Encodes tubulin-folding cofactor D. Mutants arrest during embryogenesis with embryos that are small, mushroom-shaped (Primepilz Prime) and consist of only one or few large cells each containing one or more variably enlarged nuclei and often cell wall stubs. Gene product necessary for continuous microtubule organization.                                                                                                                                                                            | 21.34   | 11.67  | 1.83 | 3.57E-04 | 3.36E-03 |
| 3094 | 4 | F2-3 vs. M2-3 | 249472_at | AT5G39210 | Encodes a protein of the chloroplastic NAD(P)H dehydrogenase complex (NDH Complex) involved in respiration, photosystem I (PSI) cyclic electron transport and CO2 uptake. The product of this gene appears to be essential for the stable formation of the NDH Complex. The mRNA is cell-to-cell mobile.                                                                                                                                                                                                     | 23.95   | 13.10  | 1.83 | 5.70E-04 | 4.39E-03 |
| 3095 | 4 | F2-3 vs. M2-3 | 259839_at | AT1G52190 | Encodes a low affinity nitrate transporter that is expressed in the plasma membrane and found in the phloem of the major veins of leaves. It is responsible for nitrate redistribution to young leaves.                                                                                                                                                                                                                                                                                                      | 762.78  | 419.45 | 1.82 | 3.22E-04 | 3.17E-03 |
| 3096 | 4 | F2-3 vs. M2-3 | 263876_at | AT2G21880 | RAB GTPase homolog 7A;(source:Araport11)                                                                                                                                                                                                                                                                                                                                                                                                                                                                     | 37.80   | 20.73  | 1.82 | 5.40E-04 | 4.28E-03 |
| 3097 | 4 | F2-3 vs. M2-3 | 258038_at | AT3G21260 | Glycolipid transfer protein (GLTP) family protein;(source:Araport11)                                                                                                                                                                                                                                                                                                                                                                                                                                         | 21.51   | 11.84  | 1.82 | 8.60E-05 | 1.45E-03 |
| 3098 | 4 | F2-3 vs. M2-3 | 247307_at | AT5G63860 | UV-B-specific signaling component that orchestrates expression of a range of genes with vital UV-protective functions. Located in the nucleus and the cytosol. Associates with chromatin via histones. UV-B light promotes URV8 protein accumulation in the nucleus. UVR8 interaction with COP1 is negatively regulated by RUP1 and RUP2.                                                                                                                                                                    | 45.02   | 24.72  | 1.82 | 5.03E-04 | 4.10E-03 |
| 3099 | 4 | F2-3 vs. M2-3 | 264815_at | AT1G03620 | ELMO/CED-12 family protein;(source:Araport11)<br>Encodes PGRL1B, a transmembrane protein present in thylakoids. PGRL1B has a highly homologous isoform PGRL1A encoded by At4g22890. Plants lacking PGRL1 show perturbation of cyclic electron flow, similar to PGR5-deficient plants. PGRL1 and PGR5 interact physically and associate with PSI (photosystem I).                                                                                                                                             | 23.98   | 13.25  | 1.81 | 1.33E-04 | 1.89E-03 |
| 3100 | 4 | F2-3 vs. M2-3 | 254848_at | AT4G11960 | member of SYP13 Gene Family                                                                                                                                                                                                                                                                                                                                                                                                                                                                                  | 68.36   | 37.77  | 1.81 | 6.86E-04 | 4.92E-03 |
| 3101 | 4 | F2-3 vs. M2-3 | 259338_at | AT3G03800 |                                                                                                                                                                                                                                                                                                                                                                                                                                                                                                              | 29.48   | 16.50  | 1.79 | 9.29E-04 | 5.90E-03 |
| 3102 | 4 | F2-3 vs. M2-3 | 254562_at | AT4G19230 | Encodes a protein with ABA 8'-hydroxylase activity, involved in ABA catabolism. Member of the CYP707A gene family. CYP707A1 appears to play an important role in determining the ABA levels in dry seeds. Gene involved in postgermination growth. Overexpression of CYP707A1 leads to a decrease in ABA levels and a reduction in after-ripening period to break dormancy.                                                                                                                                  | 28.69   | 15.99  | 1.79 | 1.24E-04 | 1.82E-03 |
| 3103 | 4 | F2-3 vs. M2-3 | 246620_at | AT5G36220 | This gene is a member of the CYP81D family of cytochrome p450s. It was originally called CYP91A1, but was later renamed to CYP81D1.                                                                                                                                                                                                                                                                                                                                                                          | 23.30   | 13.03  | 1.79 | 6.00E-04 | 4.51E-03 |
| 3104 | 4 | F2-3 vs. M2-3 | 260818_at | AT1G06890 | UXT3 is a member of the NST-KT subfamily of nucleotide/sugar transporters. It is localized to the golgi and functions as a UDP-Xyl transporter.                                                                                                                                                                                                                                                                                                                                                              | 193.02  | 108.73 | 1.78 | 9.99E-04 | 6.17E-03 |
| 3105 | 4 | F2-3 vs. M2-3 | 246427_at | AT5G17400 | This gene is predicted to encode an ER-localized adenine nucleotide transporter with six putative transmembrane helices. It appears to act as a ATP:ADP antiporter when expressed in E.coli plasma membranes. Transcript levels for several ER-localized chaperones (e.g. BIP1/2) and other ATP-requiring ER proteins (e.g. CPK2) are reduced in er-ant1 knock-out lines, suggesting a lack of adequate ATP transport into the ER in these mutants. They also have reduced seed oil and seed protein levels. | 38.49   | 21.60  | 1.78 | 6.51E-04 | 4.79E-03 |
| 3106 | 4 | F2-3 vs. M2-3 | 261687_at | AT1G47280 | hypothetical protein;(source:Araport11)                                                                                                                                                                                                                                                                                                                                                                                                                                                                      | 21.37   | 12.08  | 1.77 | 7.40E-04 | 5.14E-03 |
| 3107 | 4 | F2-3 vs. M2-3 | 259603_at | AT1G56500 | Encodes a thylakoid membrane protein with thioredoxin-like and beta-propeller domains located in the lumen and a haloacid-dehalogenase domain exposed to the chloroplast stroma. The protein Primes role may be to prevent formation of a slowly reversible form of antenna quenching, thereby maintaining the efficiency of light harvesting.The mRNA is cell-to-cell mobile.                                                                                                                               | 91.65   | 51.71  | 1.77 | 6.39E-04 | 4.72E-03 |
| 3108 | 4 | F2-3 vs. M2-3 | 245352_at | AT4G15490 | Encodes a protein that might have sinapic acid:UDP-glucose glucosyltransferase activity.                                                                                                                                                                                                                                                                                                                                                                                                                     | 40.79   | 23.01  | 1.77 | 4.42E-04 | 3.81E-03 |

|      |   |               |           |           |                                                                                                                                                                                                                                                                                                                                                                                                                                                                                                                                                                                                                                                                                              |         |         |      |          |          |
|------|---|---------------|-----------|-----------|----------------------------------------------------------------------------------------------------------------------------------------------------------------------------------------------------------------------------------------------------------------------------------------------------------------------------------------------------------------------------------------------------------------------------------------------------------------------------------------------------------------------------------------------------------------------------------------------------------------------------------------------------------------------------------------------|---------|---------|------|----------|----------|
|      |   |               |           |           | Encodes a MYB-domain protein involved in specification of the leaf proximodistal axis. Mutation results in lobed and dissected leaves with a characteristic asymmetry. Homologous to the Antirrhinum PHANTASTICA (PHAN) and maize ROUGH SHEATH2 (RS2) genes Asymmetric placement of auxin response at the distal leaf tip precedes visible asymmetric leaf growth. Acts alongside AXR1 to exclude BP expression in leaves and with PIN1 to repress BP and promote lateral organ growth. Interacts physically with AS2 to form a complex that binds to the BP promoter and silences BP. Also functions as a regulator of the plant immune response.                                           | 209.09  | 118.82  | 1.76 | 7.50E-04 | 5.17E-03 |
| 3109 | 4 | F2-3 vs. M2-3 | 267157_at | AT2G37630 | AMP-dependent synthetase and ligase family protein;(source:Ararport11)                                                                                                                                                                                                                                                                                                                                                                                                                                                                                                                                                                                                                       | 20.58   | 11.73   | 1.75 | 7.22E-05 | 1.33E-03 |
| 3110 | 4 | F2-3 vs. M2-3 | 254961_at | AT4G11030 | E3 ubiquitin ligase that functions in negative regulation of ABA signaling.                                                                                                                                                                                                                                                                                                                                                                                                                                                                                                                                                                                                                  | 110.55  | 63.19   | 1.75 | 4.51E-04 | 3.88E-03 |
| 3111 | 4 | F2-3 vs. M2-3 | 247125_at | AT5G66070 | seed maturation protein;(source:Ararport11)                                                                                                                                                                                                                                                                                                                                                                                                                                                                                                                                                                                                                                                  | 32.67   | 18.79   | 1.74 | 1.15E-04 | 1.76E-03 |
| 3112 | 4 | F2-3 vs. M2-3 | 263881_at | AT2G21820 | Methylenetetrahydrofolate reductase family protein;(source:Ararport11)                                                                                                                                                                                                                                                                                                                                                                                                                                                                                                                                                                                                                       | 27.32   | 15.72   | 1.74 | 5.26E-04 | 4.20E-03 |
| 3113 | 4 | F2-3 vs. M2-3 | 249527_at | AT5G38710 | nudix hydrolase homolog 17;(source:Ararport11)                                                                                                                                                                                                                                                                                                                                                                                                                                                                                                                                                                                                                                               | 132.28  | 76.36   | 1.73 | 7.40E-04 | 5.14E-03 |
| 3114 | 4 | F2-3 vs. M2-3 | 265872_at | AT2G01670 | vacuolar H+-ATPase subunit E isoform 2;(source:Ararport11)                                                                                                                                                                                                                                                                                                                                                                                                                                                                                                                                                                                                                                   | 37.07   | 21.42   | 1.73 | 4.72E-04 | 3.96E-03 |
| 3115 | 4 | F2-3 vs. M2-3 | 258671_at | AT3G08560 |                                                                                                                                                                                                                                                                                                                                                                                                                                                                                                                                                                                                                                                                                              |         |         |      |          |          |
|      |   |               |           |           | Encodes a protein whose sequence is similar to tobacco hairpin-induced gene (HIN1) and Arabidopsis non-race specific disease resistance gene (NDR1). Expression of this gene is induced by cucumber mosaic virus and spermine. Overexpression of the gene induces the expression of PR-1 gene and shows light-dependent 'speck disease-like' symptom on leaves. The gene product is localized to the chloroplast                                                                                                                                                                                                                                                                             | 35.51   | 20.50   | 1.73 | 5.19E-04 | 4.18E-03 |
| 3116 | 4 | F2-3 vs. M2-3 | 259071_at | AT3G11650 | Protein kinase superfamily protein;(source:Ararport11)                                                                                                                                                                                                                                                                                                                                                                                                                                                                                                                                                                                                                                       | 68.32   | 39.53   | 1.73 | 8.89E-04 | 5.75E-03 |
| 3117 | 4 | F2-3 vs. M2-3 | 251494_at | AT3G59350 |                                                                                                                                                                                                                                                                                                                                                                                                                                                                                                                                                                                                                                                                                              |         |         |      |          |          |
| 3118 | 4 | F2-3 vs. M2-3 | 248007_at | AT5G56260 | Ribonuclease E inhibitor RraA/Dimethylmenaquinone methyltransferase;(source:Ararport11)                                                                                                                                                                                                                                                                                                                                                                                                                                                                                                                                                                                                      | 22.09   | 12.76   | 1.73 | 9.98E-04 | 6.17E-03 |
| 3119 | 4 | F2-3 vs. M2-3 | 252822_at | AT4G39955 | alpha/beta-Hydrolases superfamily protein;(source:Ararport11)                                                                                                                                                                                                                                                                                                                                                                                                                                                                                                                                                                                                                                | 25.93   | 15.11   | 1.72 | 3.16E-04 | 3.14E-03 |
| 3120 | 4 | F2-3 vs. M2-3 | 259756_at | AT1G71080 | RNA polymerase II transcription elongation factor;(source:Ararport11)                                                                                                                                                                                                                                                                                                                                                                                                                                                                                                                                                                                                                        | 77.53   | 45.26   | 1.71 | 9.30E-04 | 5.90E-03 |
| 3121 | 4 | F2-3 vs. M2-3 | 259180_at | AT3G01680 | Encodes a protein localized to phloem filaments that is required for phloem filament formation. The mRNA is cell-to-cell mobile.                                                                                                                                                                                                                                                                                                                                                                                                                                                                                                                                                             | 34.90   | 20.54   | 1.70 | 8.09E-04 | 5.42E-03 |
|      |   |               |           |           | Encodes the only subunit of photosystem I located entirely in the thylakoid lumen. May be involved in the interaction between plastocyanin and the photosystem I complex. Phosphorylation of this protein is dependent on calcium.                                                                                                                                                                                                                                                                                                                                                                                                                                                           | 2121.52 | 1244.50 | 1.70 | 9.72E-04 | 6.09E-03 |
| 3122 | 4 | F2-3 vs. M2-3 | 247320_at | AT5G64040 | MLP-like protein 423;(source:Ararport11)                                                                                                                                                                                                                                                                                                                                                                                                                                                                                                                                                                                                                                                     | 2241.08 | 1329.37 | 1.69 | 6.32E-04 | 4.69E-03 |
| 3123 | 4 | F2-3 vs. M2-3 | 263034_at | AT1G24020 | Encodes a protein with phytol ester synthesis and diacylglycerol acyltransferase activities that is involved in the deposition of free phytol and free fatty acids in the form of phytol esters in chloroplasts, a process involved in maintaining the integrity of the photosynthetic membrane during abiotic stress and senescence.                                                                                                                                                                                                                                                                                                                                                        | 55.07   | 32.61   | 1.69 | 7.35E-04 | 5.12E-03 |
| 3124 | 4 | F2-3 vs. M2-3 | 264186_at | AT1G54570 | eukaryotic initiation factor 3 gamma subunit family protein;(source:Ararport11)                                                                                                                                                                                                                                                                                                                                                                                                                                                                                                                                                                                                              | 61.33   | 36.31   | 1.69 | 6.99E-04 | 4.97E-03 |
| 3125 | 4 | F2-3 vs. M2-3 | 266924_at | AT2G45730 |                                                                                                                                                                                                                                                                                                                                                                                                                                                                                                                                                                                                                                                                                              |         |         |      |          |          |
|      |   |               |           |           | encodes a divergent member of calmodulin, which is an EF-hand family of Ca2+-binding proteins. This gene is expressed in leaves, flowers and siliques. The gene functionally complements yeast calmodulin 1 (CAM1) but only when selected against the plasmid harboring wild-type yeast sequences. Also the protein does not form formed a complex with a basic amphiphilic helical peptide in the presence of Ca2+ in vitro. Authors suggest that this gene may represent a Ca2+-binding sensor protein that interacts with a more limited set of target proteins than do more conventional CaM isoforms. Mutations in this gene alter plant responses to abiotic stress and abscisic acid. | 18.62   | 10.99   | 1.69 | 1.14E-04 | 1.74E-03 |
| 3126 | 4 | F2-3 vs. M2-3 | 252037_at | AT3G51920 | FAD-binding Berberine family protein;(source:Ararport11)                                                                                                                                                                                                                                                                                                                                                                                                                                                                                                                                                                                                                                     | 17.26   | 10.29   | 1.68 | 6.69E-04 | 4.86E-03 |
| 3127 | 4 | F2-3 vs. M2-3 | 263228_at | AT1G30700 | Encodes IRON REGULATED1 (IREG1/FPN1), one of the Arabidopsis orthologs (AT2G38460/IREG1/FPN1 and AT5G03570/IREG2/FPN2) the iron efflux transporter ferroportin (FPN) identified in animals.                                                                                                                                                                                                                                                                                                                                                                                                                                                                                                  | 105.26  | 62.83   | 1.68 | 5.85E-04 | 4.45E-03 |
| 3128 | 4 | F2-3 vs. M2-3 | 267029_at | AT2G38460 | alpha/beta-Hydrolases superfamily protein;(source:Ararport11)                                                                                                                                                                                                                                                                                                                                                                                                                                                                                                                                                                                                                                | 24.82   | 14.74   | 1.68 | 5.40E-04 | 4.28E-03 |
| 3129 | 4 | F2-3 vs. M2-3 | 266977_at | AT2G39420 |                                                                                                                                                                                                                                                                                                                                                                                                                                                                                                                                                                                                                                                                                              |         |         |      |          |          |
| 3130 | 4 | F2-3 vs. M2-3 | 259232_at | AT3G11420 | beta-1,3-N-acetylglucosaminyltransferase lunatic protein, putative (DUF604);(source:Ararport11)                                                                                                                                                                                                                                                                                                                                                                                                                                                                                                                                                                                              | 29.69   | 17.70   | 1.68 | 9.28E-04 | 5.90E-03 |
|      |   |               |           |           | Encodes a ACT domain-containing protein. The ACT domain, named after bacterial aspartate kinase, chorismate mutase and TyrA (prephenate dehydrogenase), is a regulatory domain that serves as an amino acid-binding site in feedback-regulated amino acid metabolic enzymes. The mRNA is cell-to-cell mobile.                                                                                                                                                                                                                                                                                                                                                                                | 249.78  | 149.83  | 1.67 | 5.23E-05 | 1.13E-03 |
| 3131 | 4 | F2-3 vs. M2-3 | 256115_at | AT1G16880 |                                                                                                                                                                                                                                                                                                                                                                                                                                                                                                                                                                                                                                                                                              |         |         |      |          |          |

|      |   |               |            |           |                                                                                                                                                                                                                                                                                                                                                                                                                                                                                                                                                                   |        |        |      |          |          |
|------|---|---------------|------------|-----------|-------------------------------------------------------------------------------------------------------------------------------------------------------------------------------------------------------------------------------------------------------------------------------------------------------------------------------------------------------------------------------------------------------------------------------------------------------------------------------------------------------------------------------------------------------------------|--------|--------|------|----------|----------|
| 3132 | 4 | F2-3 vs. M2-3 | 262174_at  | AT1G74910 | KONJAC1 is imilar to sugar pyrophosphorylases but has an insertion of 2 AA in the pyrophosphorylase consensus motif that is highly conserved in GMPPs. It lacks GDP-mannose pyrophosphorylase activity but can simulate the GDP-mannose pyrophosphorylase activity of VTC1. Encodes a type II small subunit of the heteromeric geranyl(geranyl) diphosphate synthase that is localized to the chloroplast, expressed in petals and sepals and is involved in monoterpene biosynthesis. The mRNA is cell-to-cell mobile.                                           | 35.17  | 21.11  | 1.67 | 9.76E-04 | 6.09E-03 |
| 3133 | 4 | F2-3 vs. M2-3 | 252996_s_a | AT4G38460 |                                                                                                                                                                                                                                                                                                                                                                                                                                                                                                                                                                   | 158.70 | 95.28  | 1.67 | 6.79E-04 | 4.89E-03 |
| 3134 | 4 | F2-3 vs. M2-3 | 247240_at  | AT5G64660 | CYS, MET, PRO, and GLY protein 2;(source:Araport11)                                                                                                                                                                                                                                                                                                                                                                                                                                                                                                               | 30.95  | 18.49  | 1.67 | 7.73E-04 | 5.28E-03 |
| 3135 | 4 | F2-3 vs. M2-3 | 253727_at  | AT4G29350 | Encodes profilin2, a low-molecular weight, actin monomer-binding protein that regulates the organization of actin cytoskeleton. Expressed in vegetative organs. The first intron of PRF2 enhances gene expression. The mRNA is cell-to-cell mobile.                                                                                                                                                                                                                                                                                                               | 641.83 | 386.36 | 1.66 | 6.52E-04 | 4.79E-03 |
| 3136 | 4 | F2-3 vs. M2-3 | 245252_at  | AT4G17500 | Encodes a member of the ERF (ethylene response factor) subfamily B-3 of ERF/AP2 transcription factor family (ATERF-1). The protein contains one AP2 domain. There are 18 members in this subfamily including ATERF-1, ATERF-2, AND ATERF-5. The mRNA is cell-to-cell mobile.                                                                                                                                                                                                                                                                                      | 24.51  | 14.85  | 1.65 | 5.14E-04 | 4.16E-03 |
| 3137 | 4 | F2-3 vs. M2-3 | 266562_at  | AT2G23970 | Class I glutamine amidotransferase-like superfamily protein;(source:Araport11)                                                                                                                                                                                                                                                                                                                                                                                                                                                                                    | 19.12  | 11.63  | 1.64 | 3.20E-04 | 3.16E-03 |
| 3138 | 4 | F2-3 vs. M2-3 | 264080_at  | AT2G28520 | Vacuolar proton ATPase subunit VHA-a isoform 1. Localized in the trans-Golgi network. The mRNA is cell-to-cell mobile.                                                                                                                                                                                                                                                                                                                                                                                                                                            | 163.67 | 99.65  | 1.64 | 4.90E-06 | 2.60E-04 |
| 3139 | 4 | F2-3 vs. M2-3 | 259098_at  | AT3G04790 | Ribose 5-phosphate isomerase, type A protein;(source:Araport11)                                                                                                                                                                                                                                                                                                                                                                                                                                                                                                   | 148.00 | 90.22  | 1.64 | 6.10E-04 | 4.56E-03 |
| 3140 | 4 | F2-3 vs. M2-3 | 256673_at  | AT3G52370 | Fasciclin-like arabinogalactan protein. Possibly involved in embryogenesis and seed development.                                                                                                                                                                                                                                                                                                                                                                                                                                                                  | 155.48 | 94.67  | 1.64 | 9.52E-04 | 5.98E-03 |
| 3141 | 4 | F2-3 vs. M2-3 | 259598_at  | AT1G27980 | dihydroshpingosine phosphate lyase;(source:Araport11)                                                                                                                                                                                                                                                                                                                                                                                                                                                                                                             | 75.45  | 46.96  | 1.61 | 2.60E-04 | 2.87E-03 |
| 3142 | 4 | F2-3 vs. M2-3 | 263748_at  | AT2G21480 | BUSP2 plays a smaller role than BUSP1 in pollen tube growth. bups1/2 double mutants have reduced fertility due to premature rupture of pollen tubes before they reach the ovule but single busp2 mutants are fertile. BUSP2 interacts with RALF4/19 peptide ligands and ANX1/2 receptors. BUPS/ANX signaling may regulate and promote pollen tube growth.                                                                                                                                                                                                         | 16.22  | 10.06  | 1.61 | 5.99E-04 | 4.51E-03 |
| 3143 | 4 | F2-3 vs. M2-3 | 251834_at  | AT3G55170 | Ribosomal L29 family protein;(source:Araport11)                                                                                                                                                                                                                                                                                                                                                                                                                                                                                                                   | 12.17  | 7.54   | 1.61 | 5.86E-04 | 4.45E-03 |
| 3144 | 4 | F2-3 vs. M2-3 | 245150_at  | AT2G47590 | photolyase/blue light photoreceptor PHR2 (PHR2) mRNA,                                                                                                                                                                                                                                                                                                                                                                                                                                                                                                             | 47.35  | 29.54  | 1.60 | 2.89E-04 | 3.03E-03 |
| 3145 | 4 | F2-3 vs. M2-3 | 261948_at  | AT1G64680 | beta-carotene isomerase D27;(source:Araport11)                                                                                                                                                                                                                                                                                                                                                                                                                                                                                                                    | 148.49 | 94.08  | 1.58 | 5.91E-05 | 1.20E-03 |
| 3146 | 4 | F2-3 vs. M2-3 | 254398_at  | AT4G21280 | Encodes the PsbQ subunit of the oxygen evolving complex of photosystem II.                                                                                                                                                                                                                                                                                                                                                                                                                                                                                        | 185.07 | 117.94 | 1.57 | 1.14E-04 | 1.75E-03 |
| 3147 | 4 | F2-3 vs. M2-3 | 245076_at  | AT2G23170 | encodes an IAA-amido synthase that conjugates Asp and other amino acids to auxin in vitro.                                                                                                                                                                                                                                                                                                                                                                                                                                                                        | 20.33  | 13.04  | 1.56 | 3.31E-04 | 3.23E-03 |
| 3148 | 4 | F2-3 vs. M2-3 | 266483_at  | AT2G47910 | Encodes a chloroplast thylakoid membrane protein. Required for the assembly/accumulation of the NAD(P)H dehydrogenase complex of the photosynthetic electron transport chain.                                                                                                                                                                                                                                                                                                                                                                                     | 24.88  | 16.05  | 1.55 | 5.24E-04 | 4.20E-03 |
| 3149 | 4 | F2-3 vs. M2-3 | 258815_at  | AT3G04000 | ChIADR is an aldehyde reductase that catalyzes the reduction of the aldehyde carbonyl groups on saturated and alpha,beta-unsaturated aldehydes with more than 5 carbons in vitro. The N-terminal region of this protein directs GFP to the chloroplast where where ChIADR likely helps to maintain the photosynthetic process by detoxifying reactive carbonyls formed during lipid peroxidation. In addition, this enzyme can also reduce cis-3-hexenal, a major plant volatile compound that contributes to green leaf odor, as well as methylglyoxal in vitro. | 65.37  | 42.27  | 1.55 | 1.93E-04 | 2.36E-03 |
| 3150 | 4 | F2-3 vs. M2-3 | 245506_at  | AT4G15700 | Encodes a member of the CC-type glutaredoxin (ROXY) family. Predicted to encode a PR (pathogenesis-related) protein. Belongs to the plant defensin (PDF) family with the following members: At1g75830/PDF1.1, At5g44420/PDF1.2a, At2g26020/PDF1.2b, At5g44430/PDF1.2c, At2g26010/PDF1.3, At1g19610/PDF1.4, At1g55010/PDF1.5, At2g02120/PDF2.1, At2g02100/PDF2.2, At2g02130/PDF2.3, At1g61070/PDF2.4, At5g63660/PDF2.5, At2g02140/PDF2.6, At5g38330/PDF3.1 and At4g30070/PDF3.2. The mRNA is cell-to-cell mobile.                                                  | 14.32  | 9.37   | 1.53 | 3.51E-04 | 3.33E-03 |
| 3151 | 4 | F2-3 vs. M2-3 | 266118_at  | AT2G02130 | Pathogenesis-related thaumatin superfamily protein;(source:Araport11)                                                                                                                                                                                                                                                                                                                                                                                                                                                                                             | 48.42  | 31.94  | 1.52 | 9.37E-04 | 5.92E-03 |
| 3152 | 4 | F2-3 vs. M2-3 | 261248_at  | AT1G20030 | alpha/beta-Hydrolases superfamily protein;(source:Araport11)                                                                                                                                                                                                                                                                                                                                                                                                                                                                                                      | 17.73  | 11.73  | 1.51 | 8.58E-05 | 1.45E-03 |
| 3153 | 4 | F2-3 vs. M2-3 | 250335_at  | AT5G11650 | Galactose mutarotase-like superfamily protein;(source:Araport11)                                                                                                                                                                                                                                                                                                                                                                                                                                                                                                  | 134.99 | 90.00  | 1.50 | 8.60E-04 | 5.63E-03 |
| 3154 | 4 | F2-3 vs. M2-3 | 254040_at  | AT4G25900 | beta glucosidase 11;(source:Araport11)                                                                                                                                                                                                                                                                                                                                                                                                                                                                                                                            | 14.60  | 9.94   | 1.47 | 8.80E-04 | 5.72E-03 |
| 3155 | 4 | F2-3 vs. M2-3 | 262118_at  | AT1G02850 | Hypothetical protein; participates in wound-induced lateral root development.                                                                                                                                                                                                                                                                                                                                                                                                                                                                                     | 18.97  | 13.26  | 1.43 | 6.88E-04 | 4.93E-03 |
| 3156 | 4 | F2-3 vs. M2-3 | 255605_at  | AT4G01090 | Encodes a thymidine kinase that salvages DNA precursors.                                                                                                                                                                                                                                                                                                                                                                                                                                                                                                          | 10.60  | 16.01  | 0.66 | 1.66E-04 | 2.17E-03 |
| 3157 | 4 | F2-3 vs. M2-3 | 259224_at  | AT3G07800 |                                                                                                                                                                                                                                                                                                                                                                                                                                                                                                                                                                   | 66.20  | 101.96 | 0.65 | 8.86E-04 | 5.74E-03 |

|                                                                                                                                                                                                                                                                                                                                                             |   |               |           |           |                                                                                                                                                                                                                                                                                                                                      |        |         |      |          |          |
|-------------------------------------------------------------------------------------------------------------------------------------------------------------------------------------------------------------------------------------------------------------------------------------------------------------------------------------------------------------|---|---------------|-----------|-----------|--------------------------------------------------------------------------------------------------------------------------------------------------------------------------------------------------------------------------------------------------------------------------------------------------------------------------------------|--------|---------|------|----------|----------|
| 3158                                                                                                                                                                                                                                                                                                                                                        | 4 | F2-3 vs. M2-3 | 262711_at | AT1G16500 | filamentous hemagglutinin transporter;(source:Araport11)                                                                                                                                                                                                                                                                             | 31.70  | 50.54   | 0.63 | 7.03E-04 | 4.98E-03 |
| 3159                                                                                                                                                                                                                                                                                                                                                        | 4 | F2-3 vs. M2-3 | 249703_at | AT5G35560 | DENN (AEX-3) domain-containing protein;(source:Araport11)                                                                                                                                                                                                                                                                            | 46.58  | 75.70   | 0.62 | 2.98E-04 | 3.05E-03 |
| 3160                                                                                                                                                                                                                                                                                                                                                        | 4 | F2-3 vs. M2-3 | 258283_at | AT3G26750 | HECT-like ubiquitin-conjugating enzyme (E2)-binding protein;(source:Araport11)                                                                                                                                                                                                                                                       | 16.62  | 27.41   | 0.61 | 1.94E-04 | 2.36E-03 |
| 3161                                                                                                                                                                                                                                                                                                                                                        | 4 | F2-3 vs. M2-3 | 265426_at | AT2G20740 | Tetraspanin family protein;(source:Araport11)                                                                                                                                                                                                                                                                                        | 313.86 | 524.98  | 0.60 | 3.05E-04 | 3.07E-03 |
| 3162                                                                                                                                                                                                                                                                                                                                                        | 4 | F2-3 vs. M2-3 | 256722_at | AT2G34050 | ATP synthase F1 complex assembly factor;(source:Araport11)                                                                                                                                                                                                                                                                           | 35.29  | 59.28   | 0.60 | 7.60E-04 | 5.21E-03 |
| 3163                                                                                                                                                                                                                                                                                                                                                        | 4 | F2-3 vs. M2-3 | 266102_at | AT2G40720 | Tetratricopeptide repeat (TPR)-like superfamily protein;(source:Araport11)                                                                                                                                                                                                                                                           | 20.62  | 34.39   | 0.60 | 3.98E-04 | 3.58E-03 |
| Encodes profilin3, a low-molecular weight, actin monomer-binding protein that regulates the organization of actin cytoskeleton. Originally known as profilin5, and later named profilin3.                                                                                                                                                                   |   |               |           |           |                                                                                                                                                                                                                                                                                                                                      |        |         |      |          |          |
| 3164                                                                                                                                                                                                                                                                                                                                                        | 4 | F2-3 vs. M2-3 | 247964_at | AT5G56600 | Expressed in vegetative organs. Mutants have slightly elongated petioles. Lipase active on medium and short chain triacylglycerols, but not on phospho- or galactolipids. Active between pH4 and 7 with an optimum at pH6. Knock-out mutant has not obvious phenotype.                                                               | 135.31 | 227.34  | 0.60 | 6.67E-04 | 4.85E-03 |
| 3165                                                                                                                                                                                                                                                                                                                                                        | 4 | F2-3 vs. M2-3 | 263359_at | AT2G15230 | Predicted to be extracellular.                                                                                                                                                                                                                                                                                                       | 36.45  | 61.81   | 0.59 | 7.39E-05 | 1.35E-03 |
| 3166                                                                                                                                                                                                                                                                                                                                                        | 4 | F2-3 vs. M2-3 | 251251_at | AT3G62220 | Protein kinase superfamily protein;(source:Araport11)                                                                                                                                                                                                                                                                                | 101.18 | 171.83  | 0.59 | 3.06E-04 | 3.07E-03 |
| ABCG13 encodes a member of the ATP-binding cassette (ABC) transporter family protein. Mutants show defects in petal elongation resulting in a folded petal phenotype.                                                                                                                                                                                       |   |               |           |           |                                                                                                                                                                                                                                                                                                                                      |        |         |      |          |          |
| 3167                                                                                                                                                                                                                                                                                                                                                        | 4 | F2-3 vs. M2-3 | 260515_at | AT1G51460 | Encodes the catalytic subunit of a Type 1 phosphoprotein Ser/Thr phosphatase, expressed in roots, shoots and flowers. The mRNA is cell-to-cell mobile.                                                                                                                                                                               | 44.85  | 77.31   | 0.58 | 2.89E-04 | 3.03E-03 |
| 3168                                                                                                                                                                                                                                                                                                                                                        | 4 | F2-3 vs. M2-3 | 245066_at | AT2G39840 | AT hook motif DNA-binding family protein;(source:Araport11)                                                                                                                                                                                                                                                                          | 187.68 | 323.93  | 0.58 | 2.82E-04 | 3.01E-03 |
| 3169                                                                                                                                                                                                                                                                                                                                                        | 4 | F2-3 vs. M2-3 | 266929_at | AT2G45850 | UDP-galactose transporter 5;(source:Araport11)                                                                                                                                                                                                                                                                                       | 26.29  | 45.12   | 0.58 | 6.75E-04 | 4.88E-03 |
| 3170                                                                                                                                                                                                                                                                                                                                                        | 4 | F2-3 vs. M2-3 | 252506_at | AT3G46180 | Arabidopsis thaliana CDC48-interacting UBX-domain protein (PUX3)                                                                                                                                                                                                                                                                     | 19.65  | 34.01   | 0.58 | 3.44E-04 | 3.29E-03 |
| 3171                                                                                                                                                                                                                                                                                                                                                        | 4 | F2-3 vs. M2-3 | 254348_at | AT4G22150 | Encodes ALG10, an ER-resident alpha1,2-glucosyltransferase that is required for lipid-linked oligosaccharide biosynthesis and subsequently for normal leaf development and abiotic stress response.                                                                                                                                  | 329.00 | 567.57  | 0.58 | 5.78E-05 | 1.19E-03 |
| 3172                                                                                                                                                                                                                                                                                                                                                        | 4 | F2-3 vs. M2-3 | 251048_at | AT5G02410 | prohibitin 3                                                                                                                                                                                                                                                                                                                         | 26.59  | 45.63   | 0.58 | 6.74E-04 | 4.87E-03 |
| 3173                                                                                                                                                                                                                                                                                                                                                        | 4 | F2-3 vs. M2-3 | 249344_at | AT5G40770 | Cyclin A3;(source:Araport11)                                                                                                                                                                                                                                                                                                         | 184.52 | 315.59  | 0.58 | 3.06E-04 | 3.07E-03 |
| 3174                                                                                                                                                                                                                                                                                                                                                        | 4 | F2-3 vs. M2-3 | 249129_at | AT5G43080 |                                                                                                                                                                                                                                                                                                                                      | 62.22  | 106.90  | 0.58 | 8.14E-05 | 1.41E-03 |
| Member of plant TLP family which differs in having an F box domain. Plasma membrane tethering is mediated by PIP2 binding domain. Under abiotic stress TLP3 detaches from the PM and translocates to the nucleus. Mutants are insensitive to ABA.                                                                                                           |   |               |           |           |                                                                                                                                                                                                                                                                                                                                      |        |         |      |          |          |
| 3175                                                                                                                                                                                                                                                                                                                                                        | 4 | F2-3 vs. M2-3 | 266515_at | AT2G47900 | DNAJ heat shock N-terminal domain-containing protein;(source:Araport11)                                                                                                                                                                                                                                                              | 179.11 | 314.85  | 0.57 | 2.95E-04 | 3.05E-03 |
| 3176                                                                                                                                                                                                                                                                                                                                                        | 4 | F2-3 vs. M2-3 | 252935_at | AT4G39150 | Encodes a ring-box 1 like protein and component of the SCF ubiquitination complex mediating auxin responses. Forms a E3 ubiquitin ligase complex with CUL3A and At1g21780.1 a BTB domain protein.                                                                                                                                    | 57.58  | 100.60  | 0.57 | 2.87E-04 | 3.03E-03 |
| 3177                                                                                                                                                                                                                                                                                                                                                        | 4 | F2-3 vs. M2-3 | 246089_at | AT5G20570 |                                                                                                                                                                                                                                                                                                                                      | 205.39 | 359.46  | 0.57 | 3.30E-04 | 3.22E-03 |
| TRAPPIII complex protein which regulates TGN integrity, by altered TGN/EE association of several residents, including SYNTAXIN OF PLANTS 61 (SYP61), and altered vesicle morphology. Involved in regulation of endosomal function and salt stress response.                                                                                                 |   |               |           |           |                                                                                                                                                                                                                                                                                                                                      |        |         |      |          |          |
| 3178                                                                                                                                                                                                                                                                                                                                                        | 4 | F2-3 vs. M2-3 | 247112_at | AT5G65950 | Small nuclear ribonucleoprotein family protein;(source:Araport11)                                                                                                                                                                                                                                                                    | 281.21 | 491.18  | 0.57 | 2.30E-04 | 2.67E-03 |
| 3179                                                                                                                                                                                                                                                                                                                                                        | 4 | F2-3 vs. M2-3 | 259477_at | AT1G19120 |                                                                                                                                                                                                                                                                                                                                      | 351.88 | 626.64  | 0.56 | 2.62E-04 | 2.88E-03 |
| EXL1 is involved in the C-starvation response. Phenotypic changes of an exl1 loss of function mutant became evident only under corresponding experimental conditions. For example, the mutant showed diminished biomass production in a short-day/low light growth regime, impaired survival during extended night, and impaired survival of anoxia stress. |   |               |           |           |                                                                                                                                                                                                                                                                                                                                      |        |         |      |          |          |
| 3180                                                                                                                                                                                                                                                                                                                                                        | 4 | F2-3 vs. M2-3 | 245757_at | AT1G35140 | Encodes 20S proteasome subunit PAF2 (PAF2).                                                                                                                                                                                                                                                                                          | 13.00  | 23.01   | 0.56 | 5.26E-04 | 4.20E-03 |
| 3181                                                                                                                                                                                                                                                                                                                                                        | 4 | F2-3 vs. M2-3 | 260503_at | AT1G47250 | Glutathione peroxidase. Functions as both a redox transducer and a scavenger in abscisic acid and drought stress responses. Interacts with ABI2 and ABI1.                                                                                                                                                                            | 75.54  | 134.85  | 0.56 | 6.11E-04 | 4.56E-03 |
| 3182                                                                                                                                                                                                                                                                                                                                                        | 4 | F2-3 vs. M2-3 | 260545_at | AT2G43350 | UAP56-interacting factor1, binds single stranded RNA and, along with UIEF2,,appears to play a role in nuclear export of RNA.                                                                                                                                                                                                         | 21.55  | 38.35   | 0.56 | 4.24E-05 | 1.01E-03 |
| 3183                                                                                                                                                                                                                                                                                                                                                        | 4 | F2-3 vs. M2-3 | 254957_at | AT4G10970 | member of CYP81F                                                                                                                                                                                                                                                                                                                     | 61.96  | 111.40  | 0.56 | 3.76E-05 | 9.26E-04 |
| 3184                                                                                                                                                                                                                                                                                                                                                        | 4 | F2-3 vs. M2-3 | 253100_at | AT4G37400 | ARM repeat superfamily protein;(source:Araport11)                                                                                                                                                                                                                                                                                    | 31.30  | 55.88   | 0.56 | 8.78E-04 | 5.72E-03 |
| 3185                                                                                                                                                                                                                                                                                                                                                        | 4 | F2-3 vs. M2-3 | 246621_at | AT5G36230 | FH protein interacting protein FIP2                                                                                                                                                                                                                                                                                                  | 805.10 | 1450.55 | 0.56 | 8.38E-04 | 5.54E-03 |
| 3186                                                                                                                                                                                                                                                                                                                                                        | 4 | F2-3 vs. M2-3 | 248117_at | AT5G55000 | Encodes a member of the mitochondrial acyl carrier protein (ACP) family. As part of the mitochondrial matrix, it is likely to be involved in fatty acid or lipoid acid biogenesis. Its acylated form is predominantly present in the mitochondrial membrane while the non-acylated form is soluble. The mRNA is cell-to-cell mobile. | 239.00 | 424.33  | 0.56 | 7.02E-04 | 4.98E-03 |
| 3187                                                                                                                                                                                                                                                                                                                                                        | 4 | F2-3 vs. M2-3 | 266890_at | AT2G44620 |                                                                                                                                                                                                                                                                                                                                      | 79.77  | 145.11  | 0.55 | 4.11E-04 | 3.65E-03 |

|      |   |               |                 |           |                                                                                                                                                                                                                                                                                                                                                                               |        |        |      |          |          |
|------|---|---------------|-----------------|-----------|-------------------------------------------------------------------------------------------------------------------------------------------------------------------------------------------------------------------------------------------------------------------------------------------------------------------------------------------------------------------------------|--------|--------|------|----------|----------|
| 3188 | 4 | F2-3 vs. M2-3 | 252464_at       | AT3G47160 | RING/U-box superfamily protein;(source:Araport11)                                                                                                                                                                                                                                                                                                                             | 54.31  | 99.09  | 0.55 | 1.39E-04 | 1.95E-03 |
| 3189 | 4 | F2-3 vs. M2-3 | 253854_at       | AT4G27900 | CCT motif family protein;(source:Araport11)                                                                                                                                                                                                                                                                                                                                   | 186.27 | 340.83 | 0.55 | 2.30E-04 | 2.67E-03 |
| 3190 | 4 | F2-3 vs. M2-3 | 261239_at       | AT1G32930 | Galactosyltransferase family protein;(source:Araport11)                                                                                                                                                                                                                                                                                                                       | 79.42  | 148.17 | 0.54 | 3.57E-04 | 3.36E-03 |
| 3191 | 4 | F2-3 vs. M2-3 | 256143_at       | AT1G48830 | Ribosomal protein S7e family protein;(source:Araport11)                                                                                                                                                                                                                                                                                                                       | 277.88 | 512.63 | 0.54 | 1.42E-04 | 1.97E-03 |
| 3192 | 4 | F2-3 vs. M2-3 | 263738_at       | AT1G60060 | Serine/threonine-protein kinase WNK (With No Lysine)-like protein;(source:Araport11)                                                                                                                                                                                                                                                                                          | 21.02  | 38.82  | 0.54 | 1.82E-04 | 2.29E-03 |
| 3193 | 4 | F2-3 vs. M2-3 | 267071_at       | AT2G40980 | Protein kinase superfamily protein;(source:Araport11)                                                                                                                                                                                                                                                                                                                         | 34.46  | 63.23  | 0.54 | 4.61E-04 | 3.92E-03 |
| 3194 | 4 | F2-3 vs. M2-3 | 258206_at       | AT3G14010 | hydroxyproline-rich glycoprotein family protein, similar to Mrs16p (GI:2737884) (Saccharomyces cerevisiae); weak similarity to ataxin-2 related protein (GI:1679686) (Homo sapiens). Included in a family of CTC interacting domain proteins found to interact with PAB2.                                                                                                     | 20.89  | 38.78  | 0.54 | 9.92E-04 | 6.15E-03 |
| 3195 | 4 | F2-3 vs. M2-3 | 245255_at       | AT4G14110 | Represses photomorphogenesis and induces skotomorphogenesis in the dark. A component of the COP9 signalosome complex.                                                                                                                                                                                                                                                         | 64.21  | 119.49 | 0.54 | 8.50E-05 | 1.44E-03 |
| 3196 | 4 | F2-3 vs. M2-3 | 254670_at       | AT4G18390 | TEOSINTE BRANCHED 1, cycloidea and PCF transcription factor 2;(source:Araport11)                                                                                                                                                                                                                                                                                              | 50.62  | 93.18  | 0.54 | 6.64E-04 | 4.84E-03 |
| 3197 | 4 | F2-3 vs. M2-3 | 253805_at       | AT4G28260 | acyl-UDP-N-acetylglucosamine O-acyltransferase;(source:Araport11)                                                                                                                                                                                                                                                                                                             | 74.07  | 136.13 | 0.54 | 8.45E-05 | 1.44E-03 |
| 3198 | 4 | F2-3 vs. M2-3 | 253766_at       | AT4G28770 | Tetraspanin family protein;(source:Araport11)                                                                                                                                                                                                                                                                                                                                 | 29.00  | 53.59  | 0.54 | 3.85E-05 | 9.37E-04 |
| 3199 | 4 | F2-3 vs. M2-3 | 250051_at       | AT5G17800 | Member of the R2R3 factor gene family that acts as a cell-specific repressor of quiescent center (QC) divisions in the primary root, acting through the BR signaling pathway. Works with BES1 to regulate QC division in the root.                                                                                                                                            | 51.25  | 94.57  | 0.54 | 7.50E-04 | 5.17E-03 |
| 3200 | 4 | F2-3 vs. M2-3 | 263633_at       | AT2G04890 | Encodes a scarecrow-like protein (SCL21). Member of GRAS gene family.                                                                                                                                                                                                                                                                                                         | 83.34  | 155.95 | 0.53 | 4.12E-04 | 3.66E-03 |
| 3201 | 4 | F2-3 vs. M2-3 | 267462_at       | AT2G33735 | Chaperone DnaJ-domain superfamily protein;(source:Araport11)                                                                                                                                                                                                                                                                                                                  | 86.64  | 164.83 | 0.53 | 7.30E-04 | 5.10E-03 |
| 3202 | 4 | F2-3 vs. M2-3 | 258665_at       | AT3G08710 | Associated to plasma membrane. Moves cell to cell, suggesting a role in intercellular communication.                                                                                                                                                                                                                                                                          | 51.46  | 96.45  | 0.53 | 3.06E-04 | 3.07E-03 |
| 3203 | 4 | F2-3 vs. M2-3 | 257131_at       | AT3G20240 | Mitochondrial substrate carrier family protein;(source:Araport11)                                                                                                                                                                                                                                                                                                             | 54.15  | 102.68 | 0.53 | 9.96E-04 | 6.17E-03 |
| 3204 | 4 | F2-3 vs. M2-3 | 256889_at       | AT3G24010 | ING1 encodes a member of the Inhibitor of Growth family of nuclear-localized Phd domain containing homeodomain proteins. Binds to H3K4 di or trimethylated DNA.                                                                                                                                                                                                               | 119.48 | 226.37 | 0.53 | 6.65E-04 | 4.84E-03 |
| 3205 | 4 | F2-3 vs. M2-3 | 251352_at       | AT3G61070 | member of the peroxin11 (PEX11) gene family, integral to peroxisome membrane, controls peroxisome proliferation.                                                                                                                                                                                                                                                              | 42.09  | 79.17  | 0.53 | 2.78E-04 | 2.99E-03 |
| 3206 | 4 | F2-3 vs. M2-3 | 253633_at       | AT4G30480 | Encodes one of the 36 carboxylate clamp (CC)-tetratricopeptide repeat (TPR) proteins (Prasad 2010, Pubmed ID: 20856808). Interacts with Hsp90/Hsp70 as co-chaperone.                                                                                                                                                                                                          | 110.40 | 209.44 | 0.53 | 4.34E-04 | 3.77E-03 |
| 3207 | 4 | F2-3 vs. M2-3 | 248694_at       | AT5G48340 | hypothetical protein;(source:Araport11)                                                                                                                                                                                                                                                                                                                                       | 111.75 | 211.10 | 0.53 | 2.89E-04 | 3.03E-03 |
| 3208 | 4 | F2-3 vs. M2-3 | 259669_at       | AT1G52340 | Encodes a cytosolic short-chain dehydrogenase/reductase involved in the conversion of xanthoxin to ABA-aldehyde during ABA biosynthesis. Mutants are insensitive to sucrose and glucose.                                                                                                                                                                                      | 24.56  | 47.22  | 0.52 | 2.79E-04 | 2.99E-03 |
| 3209 | 4 | F2-3 vs. M2-3 | 262355_at       | AT1G72820 | Mitochondrial substrate carrier family protein;(source:Araport11)                                                                                                                                                                                                                                                                                                             | 119.01 | 226.68 | 0.52 | 4.66E-04 | 3.94E-03 |
| 3210 | 4 | F2-3 vs. M2-3 | 263332_at       | AT2G03870 | Small nuclear ribonucleoprotein family protein;(source:Araport11)                                                                                                                                                                                                                                                                                                             | 208.33 | 398.12 | 0.52 | 1.96E-05 | 6.30E-04 |
| 3211 | 4 | F2-3 vs. M2-3 | 263564_s_a<br>t | AT2G15400 | Non-catalytic subunit of Nuclear DNA-dependent RNA polymerase V; homologous to budding yeast RPB3 and the E. coli RNA polymerase alpha subunit. A closely related paralog, At2g15430 can substitute for At2g15400 in the context of Pol V and encodes the equivalent subunit of Pol II and Pol IV.                                                                            | 55.29  | 107.36 | 0.52 | 6.60E-04 | 4.83E-03 |
| 3212 | 4 | F2-3 vs. M2-3 | 258484_at       | AT3G02580 | Brassinosteroid biosynthetic enzyme, catalyzes delta7 sterol C-5 desaturation step. Mutant has dwarf phenotype.                                                                                                                                                                                                                                                               | 106.32 | 205.18 | 0.52 | 4.97E-04 | 4.10E-03 |
| 3213 | 4 | F2-3 vs. M2-3 | 258921_at       | AT3G10500 | Encodes a transcriptional activator that is associated with the plasma membrane in a dormant form and is proteolytically cleaved to create a form that can enter the nucleus. It is thought to promote ROS production by binding directly to the promoters of genes encoding ROS biosynthetic enzymes during drought-induced leaf senescence.The mRNA is cell-to-cell mobile. | 108.38 | 209.48 | 0.52 | 3.58E-04 | 3.36E-03 |
| 3214 | 4 | F2-3 vs. M2-3 | 257967_at       | AT3G19910 | RING/U-box superfamily protein;(source:Araport11)                                                                                                                                                                                                                                                                                                                             | 267.06 | 517.12 | 0.52 | 4.54E-04 | 3.88E-03 |
| 3215 | 4 | F2-3 vs. M2-3 | 251781_at       | AT3G55320 | P-glycoprotein 20;(source:Araport11)                                                                                                                                                                                                                                                                                                                                          | 27.33  | 52.13  | 0.52 | 4.68E-04 | 3.94E-03 |
| 3216 | 4 | F2-3 vs. M2-3 | 255500_at       | AT4G02390 | Encodes a DNA dependent nuclear poly (ADP-ribose) polymerase (E.C.2.4.2.30), thought to be involved in post-translational modification .                                                                                                                                                                                                                                      | 26.23  | 50.79  | 0.52 | 3.98E-04 | 3.58E-03 |



|      |   |               |           |           |                                                                                                                                                                                                                                                                                                                                                                                                                                                                                                                                                                                                                                                                                              |        |         |      |          |          |
|------|---|---------------|-----------|-----------|----------------------------------------------------------------------------------------------------------------------------------------------------------------------------------------------------------------------------------------------------------------------------------------------------------------------------------------------------------------------------------------------------------------------------------------------------------------------------------------------------------------------------------------------------------------------------------------------------------------------------------------------------------------------------------------------|--------|---------|------|----------|----------|
|      |   |               |           |           | Encodes a nuclear cap-binding protein that forms a heterodimeric complex with CBP20 and is involved in ABA signaling and flowering. Mutants are early flowering and exhibit hypersensitive response to ABA in germination inhibition. Loss of ABH1 function results in abnormal processing of mRNAs for several important floral regulators (FLC, CO, FLM). Analysis of loss of function mutations suggests a role in pri-miRNA processing and mRNA splicing. Note that two different mutant alleles were given the same name abh1-7 (Kuhn et al 2007; Kim et al 2008). To avoid confusion, abh1-7 described in Kim et al (2008) has been renamed abh1-107 (other names: ensalada-1, ens-1). |        |         |      |          |          |
| 3217 | 4 | F2-3 vs. M2-3 | 263727_at | AT2G13540 | Encodes HCF243 (high chlorophyll fluorescence), a chloroplast-localized protein involved in the D1 protein stability of the photosystem II complex1.                                                                                                                                                                                                                                                                                                                                                                                                                                                                                                                                         | 148.36 | 289.39  | 0.51 | 9.93E-04 | 6.15E-03 |
| 3218 | 4 | F2-3 vs. M2-3 | 257236_at | AT3G15095 | Pectin lyase-like superfamily protein;(source:Araport11)                                                                                                                                                                                                                                                                                                                                                                                                                                                                                                                                                                                                                                     | 71.89  | 141.24  | 0.51 | 4.58E-04 | 3.91E-03 |
| 3219 | 4 | F2-3 vs. M2-3 | 249275_at | AT5G41870 | Replication protein A, subunit RPA32;(source:Araport11)                                                                                                                                                                                                                                                                                                                                                                                                                                                                                                                                                                                                                                      | 52.47  | 103.46  | 0.51 | 8.85E-04 | 5.74E-03 |
| 3220 | 4 | F2-3 vs. M2-3 | 258612_at | AT3G02920 | Encodes a protein with similarity to mammalian RACKs. RACKs function to shuttle activated protein kinase C to different subcellular sites and may also function as a scaffold through physical interactions with other proteins. RACK1C has no phenotype on its own and probably acts redundantly with RACK1A and RACK1B.                                                                                                                                                                                                                                                                                                                                                                    | 37.96  | 75.86   | 0.50 | 7.52E-04 | 5.17E-03 |
| 3221 | 4 | F2-3 vs. M2-3 | 258155_at | AT3G18130 | Rab5-interacting family protein;(source:Araport11)                                                                                                                                                                                                                                                                                                                                                                                                                                                                                                                                                                                                                                           | 891.57 | 1767.71 | 0.50 | 9.35E-04 | 5.92E-03 |
| 3222 | 4 | F2-3 vs. M2-3 | 266789_at | AT2G29020 | Encodes a class II HD-ZIP protein that regulates meristematic activity in different tissues, and that it is necessary for the correct formation of the gynoecium.                                                                                                                                                                                                                                                                                                                                                                                                                                                                                                                            | 353.47 | 716.96  | 0.49 | 6.06E-04 | 4.54E-03 |
| 3223 | 4 | F2-3 vs. M2-3 | 245362_at | AT4G17460 | SWIB complex BAF60b domain-containing protein;(source:Araport11)                                                                                                                                                                                                                                                                                                                                                                                                                                                                                                                                                                                                                             | 56.42  | 115.91  | 0.49 | 8.00E-04 | 5.38E-03 |
| 3224 | 4 | F2-3 vs. M2-3 | 254359_at | AT4G22360 | nucleolin;(source:Araport11)                                                                                                                                                                                                                                                                                                                                                                                                                                                                                                                                                                                                                                                                 | 55.85  | 114.97  | 0.49 | 1.44E-04 | 1.97E-03 |
| 3225 | 4 | F2-3 vs. M2-3 | 261207_at | AT1G12830 | Encodes a member of the Alfin1-like family of nuclear-localized PHD (plant homeodomain) domain containing proteins. All AL proteins except AL3 bind to di- or trimethylated histone H3 (H3K4me3/2). Members of this family include: AT5G05610 (AL1), AT3G11200 (AL2), AT3G42790 (AL3), AT5G26210 (AL4), AT5G20510 (AL5), AT2G02470 (AL6), AT1G14510 (AL7).                                                                                                                                                                                                                                                                                                                                   | 26.02  | 54.36   | 0.48 | 6.94E-04 | 4.96E-03 |
| 3226 | 4 | F2-3 vs. M2-3 | 261486_at | AT1G14510 | Encodes a NAC domain transcription factor that regulates the mitochondrial retrograde response and coordinates organellar functions and stress responses.                                                                                                                                                                                                                                                                                                                                                                                                                                                                                                                                    | 201.56 | 416.20  | 0.48 | 6.60E-06 | 2.99E-04 |
| 3227 | 4 | F2-3 vs. M2-3 | 262514_at | AT1G34190 | Encodes DRP5A, a dynamin protein involved in cytokinesis in Arabidopsis.                                                                                                                                                                                                                                                                                                                                                                                                                                                                                                                                                                                                                     | 114.05 | 240.04  | 0.48 | 3.66E-05 | 9.26E-04 |
| 3228 | 4 | F2-3 vs. M2-3 | 261364_at | AT1G53140 | Tetratricopeptide repeat (TPR)-like superfamily protein;(source:Araport11)                                                                                                                                                                                                                                                                                                                                                                                                                                                                                                                                                                                                                   | 42.32  | 87.45   | 0.48 | 5.48E-04 | 4.33E-03 |
| 3229 | 4 | F2-3 vs. M2-3 | 252148_at | AT3G51280 | Galactose mutarotase-like superfamily protein;(source:Araport11)                                                                                                                                                                                                                                                                                                                                                                                                                                                                                                                                                                                                                             | 41.22  | 86.05   | 0.48 | 1.74E-04 | 2.23E-03 |
| 3230 | 4 | F2-3 vs. M2-3 | 251319_at | AT3G61610 | Member of the MADs box transcription factor family. SEP3 is redundant with SEP1 and 2. Flowers of SEP1/2/3 triple mutants show a conversion of petals and stamens to sepals. SEP3 forms heterotetrameric complexes with other MADS box family members and binds to the CArG box motif.                                                                                                                                                                                                                                                                                                                                                                                                       | 65.37  | 135.56  | 0.48 | 5.15E-04 | 4.16E-03 |
| 3231 | 4 | F2-3 vs. M2-3 | 264872_at | AT1G24260 | encodes sirohydrochlorin ferrochelataze catalyzing the last step of the siroheme biosynthesis                                                                                                                                                                                                                                                                                                                                                                                                                                                                                                                                                                                                | 125.54 | 267.26  | 0.47 | 1.00E-06 | 1.06E-04 |
| 3232 | 4 | F2-3 vs. M2-3 | 262417_at | AT1G50170 | Encodes ABCC13/MRP11, a member of the multidrug resistance associated protein MRP/ABCC subfamily. Its expression is induced by gibberellic acid and downregulated by naphthalene acetic acid, abscisic acid, and zeatin.                                                                                                                                                                                                                                                                                                                                                                                                                                                                     | 42.53  | 89.57   | 0.47 | 8.41E-04 | 5.55E-03 |
| 3233 | 4 | F2-3 vs. M2-3 | 266038_at | AT2G07680 | Encodes a protein disulfide isomerase-like (PDIL) protein, a member of a multigene family within the thioredoxin (TRX) superfamily. This protein also belongs to the adenosine 5'-phosphosulfate reductase-like (APRL) group. The mRNA is cell-to-cell mobile.                                                                                                                                                                                                                                                                                                                                                                                                                               | 25.49  | 54.38   | 0.47 | 8.27E-04 | 5.50E-03 |
| 3234 | 4 | F2-3 vs. M2-3 | 259349_at | AT3G03860 | SNF1-related protein kinase regulatory subunit gamma 1;(source:Araport11)                                                                                                                                                                                                                                                                                                                                                                                                                                                                                                                                                                                                                    | 20.90  | 44.34   | 0.47 | 5.61E-04 | 4.37E-03 |
| 3235 | 4 | F2-3 vs. M2-3 | 252323_at | AT3G48530 | Encodes a protein with E3 ubiquitin ligase activity that is involved in negative regulation of salt stress tolerance during germination.                                                                                                                                                                                                                                                                                                                                                                                                                                                                                                                                                     | 96.66  | 204.78  | 0.47 | 1.84E-04 | 2.30E-03 |
| 3236 | 4 | F2-3 vs. M2-3 | 252230_at | AT3G49810 | Nuclear transport factor 2 (NTF2) family protein;(source:Araport11)                                                                                                                                                                                                                                                                                                                                                                                                                                                                                                                                                                                                                          | 44.86  | 95.44   | 0.47 | 7.81E-04 | 5.31E-03 |
| 3237 | 4 | F2-3 vs. M2-3 | 254953_at | AT4G10925 | MITOCHONDRIAL FERREDOXIN 2;(source:Araport11)                                                                                                                                                                                                                                                                                                                                                                                                                                                                                                                                                                                                                                                | 110.34 | 233.99  | 0.47 | 5.65E-04 | 4.37E-03 |
| 3238 | 4 | F2-3 vs. M2-3 | 254451_at | AT4G21090 | Pectin lyase-like superfamily protein;(source:Araport11)                                                                                                                                                                                                                                                                                                                                                                                                                                                                                                                                                                                                                                     | 214.57 | 458.18  | 0.47 | 2.97E-04 | 3.05E-03 |
| 3239 | 4 | F2-3 vs. M2-3 | 245965_at | AT5G19730 | Encodes a Bem46-like protein. WAV2 negatively regulates root bending when roots alter their growth direction. It's not involved in sensing environmental stimuli (e.g. gravity, light, water, touch).                                                                                                                                                                                                                                                                                                                                                                                                                                                                                        | 69.13  | 148.18  | 0.47 | 7.48E-04 | 5.17E-03 |
| 3240 | 4 | F2-3 vs. M2-3 | 246090_at | AT5G20520 |                                                                                                                                                                                                                                                                                                                                                                                                                                                                                                                                                                                                                                                                                              | 61.86  | 130.40  | 0.47 | 9.11E-04 | 5.84E-03 |

|      |   |               |           |           |                                                                                                                                                                                                                                                                                                                                                                                                                                                                                                                                                                                                                                                                                                            |        |        |      |          |          |
|------|---|---------------|-----------|-----------|------------------------------------------------------------------------------------------------------------------------------------------------------------------------------------------------------------------------------------------------------------------------------------------------------------------------------------------------------------------------------------------------------------------------------------------------------------------------------------------------------------------------------------------------------------------------------------------------------------------------------------------------------------------------------------------------------------|--------|--------|------|----------|----------|
| 3241 | 4 | F2-3 vs. M2-3 | 252637_at | AT3G44530 | Encodes a nuclear localized WD-repeat containing protein involved in negative regulation of knox gene expression via epigenetic mechanism of chromatin re-organization. It is a part of the HISTONE REGULATOR complex that deposits histones in a DNA synthesis-independent manner and affects both nucleosome occupancy and the maintenance of transcriptional silencing. Interacts physically and genetically with AS1. Expressed in meristem and leaf primordia. Homozygous mutants are embryo lethal. Phenotype of cosuppressed lines is variable but show effects on leaf development similar to as1/as2.                                                                                             | 68.11  | 148.72 | 0.46 | 6.80E-06 | 3.02E-04 |
| 3242 | 4 | F2-3 vs. M2-3 | 253946_at | AT4G26790 | GDSL-motif esterase/acyltransferase/lipase. Enzyme group with broad substrate specificity that may catalyze acyltransfer or hydrolase reactions with lipid and non-lipid substrates.                                                                                                                                                                                                                                                                                                                                                                                                                                                                                                                       | 24.29  | 53.10  | 0.46 | 8.70E-04 | 5.68E-03 |
| 3243 | 4 | F2-3 vs. M2-3 | 253338_at | AT4G33430 | Leu-rich receptor Serine/threonine protein kinase. Component of BR signaling that interacts with BRI1 in vitro and in vivo to form a heterodimer. Brassinolide-dependent association of BRI1 and BAK1 in vivo. Phosphorylation of both BRI1 and BAK1 on Thr residues was BR dependent. Although BAK1 and BRI1 alone localize in the plasma membrane, when BAK1 and BRI1 are coexpressed, the heterodimer BAK1/BRI1 they form is localized in the endosome.                                                                                                                                                                                                                                                 | 25.42  | 54.71  | 0.46 | 8.50E-04 | 5.58E-03 |
| 3244 | 4 | F2-3 vs. M2-3 | 250563_at | AT5G08050 | Encodes a grana core localized protein. Mutant plants have reduced NPQ, affected organization of light-harvesting complex II and an enhanced grana stacking.                                                                                                                                                                                                                                                                                                                                                                                                                                                                                                                                               | 81.58  | 178.25 | 0.46 | 2.98E-04 | 3.05E-03 |
| 3245 | 4 | F2-3 vs. M2-3 | 247238_at | AT5G64610 | Encodes an enzyme with histone acetyltransferase activity. HAM1 primarily acetylate histone H4, but also display some ability to acetylate H3. Prior acetylation of lysine 5 on histone H4 reduces radioactive acetylation by either HAM1. HAM1 acetylates histone H4 lysine 5.                                                                                                                                                                                                                                                                                                                                                                                                                            | 76.48  | 166.44 | 0.46 | 5.85E-04 | 4.45E-03 |
| 3246 | 4 | F2-3 vs. M2-3 | 261810_at | AT1G08130 | Encodes the Arabidopsis DNA ligase 1 that provides the major DNA ligase activity in cells and plays a key role in both DNA replication and excision repair pathways. In addition, it is an important component of the active DNA demethylation machinery and is indispensable for cell viability. AtLIG1 expresses one major and two minor mRNA transcripts differing only in the length of the 5' untranslated leader sequences preceding a common ORF. Translation from the first in-frame start codon produces an AtLIG1 isoform that is targeted exclusively to the mitochondria. Translation initiation from the second in-frame start codon produces an AtLIG1 isoform targeted only to the nucleus. | 109.70 | 242.76 | 0.45 | 7.65E-05 | 1.36E-03 |
| 3247 | 4 | F2-3 vs. M2-3 | 262313_at | AT1G70900 | hypothetical protein;(source:Araport11)                                                                                                                                                                                                                                                                                                                                                                                                                                                                                                                                                                                                                                                                    | 40.40  | 90.60  | 0.45 | 4.99E-04 | 4.10E-03 |
| 3248 | 4 | F2-3 vs. M2-3 | 260331_at | AT1G80270 | PENTATRICOPEPTIDE REPEAT 596;(source:Araport11)                                                                                                                                                                                                                                                                                                                                                                                                                                                                                                                                                                                                                                                            | 312.13 | 687.92 | 0.45 | 1.31E-04 | 1.89E-03 |
| 3249 | 4 | F2-3 vs. M2-3 | 258487_at | AT3G02550 | LOB domain-containing protein 41;(source:Araport11)                                                                                                                                                                                                                                                                                                                                                                                                                                                                                                                                                                                                                                                        | 30.25  | 67.12  | 0.45 | 5.18E-04 | 4.18E-03 |
| 3250 | 4 | F2-3 vs. M2-3 | 256939_at | AT3G22630 | Encodes 20S proteasome beta subunit PBD1 (PBD1). Encodes a cytoplasmic thiouridylase that is essential for tRNA thiolation. Its activity appears to be important in root development.                                                                                                                                                                                                                                                                                                                                                                                                                                                                                                                      | 196.38 | 445.34 | 0.44 | 3.42E-04 | 3.28E-03 |
| 3251 | 4 | F2-3 vs. M2-3 | 253115_at | AT4G35910 | Replication factor-A protein 1-like protein;(source:Araport11)                                                                                                                                                                                                                                                                                                                                                                                                                                                                                                                                                                                                                                             | 23.36  | 53.60  | 0.44 | 2.63E-04 | 2.88E-03 |
| 3252 | 4 | F2-3 vs. M2-3 | 247606_at | AT5G61000 | encodes a cytosolic thioredoxin that reduces disulfide bridges of target proteins by the reversible formation of a disulfide bridge between two neighboring Cys residues present in the active site. Thioredoxins have been found to regulate a variety of biological reactions in prokaryotic and eukaryotic cells.                                                                                                                                                                                                                                                                                                                                                                                       | 42.03  | 95.59  | 0.44 | 4.78E-05 | 1.08E-03 |
| 3253 | 4 | F2-3 vs. M2-3 | 260943_at | AT1G45145 | Encodes one of two ubiquitin-conjugating enzymes belonging to the E2-C gene family (the other being UBC19). Transcript is always found in dividing cells, but also in other non-dividing cells.                                                                                                                                                                                                                                                                                                                                                                                                                                                                                                            | 34.55  | 81.15  | 0.43 | 9.50E-04 | 5.97E-03 |
| 3254 | 4 | F2-3 vs. M2-3 | 261859_at | AT1G50490 | Methyltransferase family protein;(source:Araport11)                                                                                                                                                                                                                                                                                                                                                                                                                                                                                                                                                                                                                                                        | 118.87 | 275.69 | 0.43 | 6.43E-04 | 4.74E-03 |
| 3255 | 4 | F2-3 vs. M2-3 | 264243_at | AT1G54650 | Encodes a multisubstrate deoxyribonucleoside kinase that salvages DNA precursors. Amidophosphoribosyltransferase (ATase: EC 2.4.2.14) is a key enzyme in the pathway of purine nucleotide biosynthesis                                                                                                                                                                                                                                                                                                                                                                                                                                                                                                     | 66.98  | 156.84 | 0.43 | 1.99E-05 | 6.35E-04 |
| 3256 | 4 | F2-3 vs. M2-3 | 256341_at | AT1G72040 | Encodes a low affinity nitrate transporter that is expressed in the plasma membrane and found in the phloem of the major veins of leaves. It is responsible for nitrate redistribution to young leaves.                                                                                                                                                                                                                                                                                                                                                                                                                                                                                                    | 62.87  | 147.68 | 0.43 | 6.62E-05 | 1.25E-03 |
| 3257 | 4 | F2-3 vs. M2-3 | 263239_at | AT2G16570 | GATA zinc finger protein;(source:Araport11)                                                                                                                                                                                                                                                                                                                                                                                                                                                                                                                                                                                                                                                                | 79.80  | 187.20 | 0.43 | 3.02E-04 | 3.07E-03 |
| 3258 | 4 | F2-3 vs. M2-3 | 258332_at | AT3G16180 | AT-hook motif nuclear-localized protein 1;(source:Araport11)                                                                                                                                                                                                                                                                                                                                                                                                                                                                                                                                                                                                                                               | 15.52  | 36.38  | 0.43 | 2.91E-04 | 3.04E-03 |
| 3259 | 4 | F2-3 vs. M2-3 | 252008_at | AT3G52610 |                                                                                                                                                                                                                                                                                                                                                                                                                                                                                                                                                                                                                                                                                                            | 42.58  | 99.35  | 0.43 | 3.19E-04 | 3.16E-03 |
| 3260 | 4 | F2-3 vs. M2-3 | 254853_at | AT4G12080 |                                                                                                                                                                                                                                                                                                                                                                                                                                                                                                                                                                                                                                                                                                            | 37.27  | 87.31  | 0.43 | 4.52E-04 | 3.88E-03 |

|      |   |               |           |           |                                                                                                                                                                                                                                                                                                                                                                                                                                                                                                                                                                                                                        |        |         |      |          |          |
|------|---|---------------|-----------|-----------|------------------------------------------------------------------------------------------------------------------------------------------------------------------------------------------------------------------------------------------------------------------------------------------------------------------------------------------------------------------------------------------------------------------------------------------------------------------------------------------------------------------------------------------------------------------------------------------------------------------------|--------|---------|------|----------|----------|
| 3261 | 4 | F2-3 vs. M2-3 | 253976_at | AT4G26610 | D6PK family kinase involved in pulse-induced phototropism but also for time-dependent second positive phototropism, and continuous light-induced hypocotyl phototropism.                                                                                                                                                                                                                                                                                                                                                                                                                                               | 43.64  | 100.97  | 0.43 | 4.71E-04 | 3.96E-03 |
| 3262 | 4 | F2-3 vs. M2-3 | 252832_at | AT4G39910 | Encodes a nuclear ubiquitin-specific protease.                                                                                                                                                                                                                                                                                                                                                                                                                                                                                                                                                                         | 29.94  | 69.91   | 0.43 | 4.00E-04 | 3.59E-03 |
| 3263 | 4 | F2-3 vs. M2-3 | 249206_at | AT5G42630 | Encodes a member of the KANADI family of putative transcription factors. Involved in integument formation during ovule development and expressed at the boundary between the inner and outer integuments. It is essential for directing laminar growth of the inner integument. Along with KAN1 and KAN2, KAN4 is involved in proper localization of PIN1 in early embryogenesis. Annexins are calcium binding proteins that are localized in the cytoplasm. When cytosolic Ca <sup>2+</sup> increases, they relocate to the plasma membrane. They may be involved in the Golgi-mediated secretion of polysaccharides. | 22.20  | 52.06   | 0.43 | 6.36E-04 | 4.71E-03 |
| 3264 | 4 | F2-3 vs. M2-3 | 247210_at | AT5G65020 |                                                                                                                                                                                                                                                                                                                                                                                                                                                                                                                                                                                                                        | 587.73 | 1355.75 | 0.43 | 4.37E-05 | 1.03E-03 |
| 3265 | 4 | F2-3 vs. M2-3 | 260401_at | AT1G69840 | SPFH/Band 7/PHB domain-containing membrane-associated protein family;(source:Araport11)                                                                                                                                                                                                                                                                                                                                                                                                                                                                                                                                | 103.65 | 248.53  | 0.42 | 1.32E-04 | 1.89E-03 |
| 3266 | 4 | F2-3 vs. M2-3 | 253668_at | AT4G30220 | small nuclear ribonucleoprotein F;(source:Araport11)                                                                                                                                                                                                                                                                                                                                                                                                                                                                                                                                                                   | 130.90 | 314.26  | 0.42 | 2.00E-04 | 2.41E-03 |
| 3267 | 4 | F2-3 vs. M2-3 | 249242_at | AT5G42250 | Zinc-binding alcohol dehydrogenase family protein;(source:Araport11)                                                                                                                                                                                                                                                                                                                                                                                                                                                                                                                                                   | 80.69  | 194.40  | 0.42 | 7.95E-05 | 1.39E-03 |
| 3268 | 4 | F2-3 vs. M2-3 | 265097_at | AT1G04020 | Encodes a protein containing two tandem BRCA1 C-Terminal (BRCT) domains, which function in phosphorylation-dependent protein-protein interactions. Loss of function mutations cause defects in meristem organization due to failure to repress WUS. BARD1 binds to WUS promoter and over expression of BARD reduces the extent of WUS expression. Pentatricopeptide Repeat Protein containing the DYW motif. Required for editing of multiple plastid transcripts. Endonuclease activity.                                                                                                                              | 22.32  | 54.96   | 0.41 | 9.24E-04 | 5.88E-03 |
| 3269 | 4 | F2-3 vs. M2-3 | 262509_at | AT1G11290 | Pentatricopeptide repeat (PPR) superfamily protein;(source:Araport11)                                                                                                                                                                                                                                                                                                                                                                                                                                                                                                                                                  | 42.48  | 103.80  | 0.41 | 2.64E-04 | 2.88E-03 |
| 3270 | 4 | F2-3 vs. M2-3 | 261277_at | AT1G20230 | Chaperone DnaJ-domain superfamily protein;(source:Araport11)                                                                                                                                                                                                                                                                                                                                                                                                                                                                                                                                                           | 99.11  | 243.47  | 0.41 | 7.82E-04 | 5.31E-03 |
| 3271 | 4 | F2-3 vs. M2-3 | 256320_at | AT3G12170 | xyloglucan endotransglucosylase/hydrolase 16;(source:Araport11)                                                                                                                                                                                                                                                                                                                                                                                                                                                                                                                                                        | 41.00  | 100.65  | 0.41 | 5.73E-04 | 4.40E-03 |
| 3272 | 4 | F2-3 vs. M2-3 | 257203_at | AT3G23730 |                                                                                                                                                                                                                                                                                                                                                                                                                                                                                                                                                                                                                        | 432.52 | 1058.78 | 0.41 | 9.42E-04 | 5.94E-03 |
| 3273 | 4 | F2-3 vs. M2-3 | 254991_at | AT4G10620 | P-loop containing nucleoside triphosphate hydrolases superfamily protein;(source:Araport11)                                                                                                                                                                                                                                                                                                                                                                                                                                                                                                                            | 65.72  | 158.95  | 0.41 | 1.44E-04 | 1.97E-03 |
| 3274 | 4 | F2-3 vs. M2-3 | 264978_at | AT1G27120 | Encodes a Golgi-localized hydroxyproline-O-galactosyltransferase.                                                                                                                                                                                                                                                                                                                                                                                                                                                                                                                                                      | 70.63  | 176.37  | 0.40 | 5.01E-04 | 4.10E-03 |
| 3275 | 4 | F2-3 vs. M2-3 | 263488_at | AT2G31840 | Thioredoxin superfamily protein;(source:Araport11)                                                                                                                                                                                                                                                                                                                                                                                                                                                                                                                                                                     | 28.72  | 71.08   | 0.40 | 1.94E-05 | 6.30E-04 |
| 3276 | 4 | F2-3 vs. M2-3 | 258553_at | AT3G06960 | TGD4 is an integral dimeric beta-barrel lipid transfer protein that binds PtdOH with its N-terminus and contains dimerization domains at its C-terminus. Mutations in this gene suppress the low temperature-induced phenotype of Arabidopsis tocopherol-deficient mutant vte2.                                                                                                                                                                                                                                                                                                                                        | 33.95  | 84.76   | 0.40 | 1.88E-04 | 2.32E-03 |
| 3277 | 4 | F2-3 vs. M2-3 | 252359_at | AT3G48440 | Zinc finger C-x8-C-x5-C-x3-H type family protein;(source:Araport11)                                                                                                                                                                                                                                                                                                                                                                                                                                                                                                                                                    | 25.70  | 63.87   | 0.40 | 6.44E-04 | 4.75E-03 |
| 3278 | 4 | F2-3 vs. M2-3 | 255025_at | AT4G09900 | Encodes a protein predicted to act as a carboxylesterase. It has similarity to the SABP2 methyl salicylate esterase from tobacco. This protein does not act on methyl IAA, methyl JA, MeSA, MeGA4, or MEGA9 in vitro.                                                                                                                                                                                                                                                                                                                                                                                                  | 23.04  | 57.09   | 0.40 | 7.66E-05 | 1.36E-03 |
| 3279 | 4 | F2-3 vs. M2-3 | 245343_at | AT4G15830 | ARM repeat superfamily protein;(source:Araport11)                                                                                                                                                                                                                                                                                                                                                                                                                                                                                                                                                                      | 37.69  | 94.72   | 0.40 | 4.63E-04 | 3.93E-03 |
| 3280 | 4 | F2-3 vs. M2-3 | 254035_at | AT4G25970 | Encodes the major form of the two non-mitochondrial phosphatidylserine decarboxylase. Located at the ER. The mRNA is cell-to-cell mobile.                                                                                                                                                                                                                                                                                                                                                                                                                                                                              | 61.94  | 155.36  | 0.40 | 4.62E-04 | 3.92E-03 |
| 3281 | 4 | F2-3 vs. M2-3 | 264327_at | AT1G04170 | protein synthesis initiation factor eIF2 gamma The mRNA is cell-to-cell mobile.                                                                                                                                                                                                                                                                                                                                                                                                                                                                                                                                        | 13.29  | 33.92   | 0.39 | 3.90E-04 | 3.54E-03 |
| 3282 | 4 | F2-3 vs. M2-3 | 266303_at | AT2G27060 | Leucine-rich repeat protein kinase family protein;(source:Araport11)                                                                                                                                                                                                                                                                                                                                                                                                                                                                                                                                                   | 42.23  | 108.48  | 0.39 | 7.94E-04 | 5.36E-03 |
| 3283 | 4 | F2-3 vs. M2-3 | 256961_at | AT3G13445 | TBP (TATA binding protein) associates with TAF(II)s (TBP-associated factors) to form the TFIID general transcription factor complex                                                                                                                                                                                                                                                                                                                                                                                                                                                                                    | 68.66  | 178.24  | 0.39 | 5.99E-05 | 1.21E-03 |
| 3284 | 4 | F2-3 vs. M2-3 | 255499_at | AT4G02730 | Transducin/WD40 repeat-like superfamily protein;(source:Araport11)                                                                                                                                                                                                                                                                                                                                                                                                                                                                                                                                                     | 100.98 | 260.05  | 0.39 | 2.42E-04 | 2.74E-03 |
| 3285 | 4 | F2-3 vs. M2-3 | 255807_at | AT4G10270 | Member of the wound-induced polypeptide (WIIP) family.                                                                                                                                                                                                                                                                                                                                                                                                                                                                                                                                                                 | 16.68  | 42.45   | 0.39 | 9.18E-04 | 5.86E-03 |
| 3286 | 4 | F2-3 vs. M2-3 | 254784_at | AT4G12720 | Encodes a protein with ADP-ribose hydrolase activity. Negatively regulates EDS1-conditioned plant defense and programmed cell death.                                                                                                                                                                                                                                                                                                                                                                                                                                                                                   | 188.99 | 487.93  | 0.39 | 5.20E-05 | 1.13E-03 |
| 3287 | 4 | F2-3 vs. M2-3 | 251021_at | AT5G02140 | Pathogenesis-related thaumatin superfamily protein;(source:Araport11)                                                                                                                                                                                                                                                                                                                                                                                                                                                                                                                                                  | 21.50  | 54.91   | 0.39 | 8.74E-05 | 1.46E-03 |
| 3288 | 4 | F2-3 vs. M2-3 | 248418_at | AT5G51660 | cleavage and polyadenylation specificity factor 160;(source:Araport11)                                                                                                                                                                                                                                                                                                                                                                                                                                                                                                                                                 | 125.53 | 320.99  | 0.39 | 4.45E-04 | 3.83E-03 |
| 3289 | 4 | F2-3 vs. M2-3 | 248148_at | AT5G54930 | AT hook motif-containing protein;(source:Araport11)                                                                                                                                                                                                                                                                                                                                                                                                                                                                                                                                                                    | 35.00  | 88.72   | 0.39 | 7.53E-05 | 1.36E-03 |
| 3290 | 4 | F2-3 vs. M2-3 | 247963_at | AT5G56590 | O-Glycosyl hydrolases family 17 protein;(source:Araport11)                                                                                                                                                                                                                                                                                                                                                                                                                                                                                                                                                             | 143.60 | 366.99  | 0.39 | 9.65E-04 | 6.05E-03 |
| 3291 | 4 | F2-3 vs. M2-3 | 261178_at | AT1G04760 | member of Synaptobrevin-like protein family                                                                                                                                                                                                                                                                                                                                                                                                                                                                                                                                                                            | 57.94  | 153.15  | 0.38 | 3.05E-04 | 3.07E-03 |
| 3292 | 4 | F2-3 vs. M2-3 | 261080_at | AT1G07370 | Encodes putative proliferating cell nuclear antigen involved in cell cycle regulation. May be sumoylated.                                                                                                                                                                                                                                                                                                                                                                                                                                                                                                              | 100.72 | 264.03  | 0.38 | 6.11E-05 | 1.21E-03 |
| 3293 | 4 | F2-3 vs. M2-3 | 259103_at | AT3G11690 | hypothetical protein;(source:Araport11)                                                                                                                                                                                                                                                                                                                                                                                                                                                                                                                                                                                | 60.09  | 158.01  | 0.38 | 9.25E-05 | 1.53E-03 |

|      |   |               |           |           |                                                                                                                                                                                                                                                                                                                                                                                                                                                                                                                                                                                                                                   |        |        |      |          |          |
|------|---|---------------|-----------|-----------|-----------------------------------------------------------------------------------------------------------------------------------------------------------------------------------------------------------------------------------------------------------------------------------------------------------------------------------------------------------------------------------------------------------------------------------------------------------------------------------------------------------------------------------------------------------------------------------------------------------------------------------|--------|--------|------|----------|----------|
| 3294 | 4 | F2-3 vs. M2-3 | 245898_at | AT5G11020 | Protein kinase superfamily protein;(source:Araport11)                                                                                                                                                                                                                                                                                                                                                                                                                                                                                                                                                                             | 150.50 | 397.71 | 0.38 | 4.38E-04 | 3.79E-03 |
| 3295 | 4 | F2-3 vs. M2-3 | 250150_at | AT5G14710 | proteasome assembly chaperone-like protein;(source:Araport11)                                                                                                                                                                                                                                                                                                                                                                                                                                                                                                                                                                     | 69.38  | 184.57 | 0.38 | 3.84E-04 | 3.51E-03 |
| 3296 | 4 | F2-3 vs. M2-3 | 246443_at | AT5G17620 | nuclear matrix protein;(source:Araport11)                                                                                                                                                                                                                                                                                                                                                                                                                                                                                                                                                                                         | 94.96  | 249.75 | 0.38 | 7.04E-04 | 4.98E-03 |
| 3297 | 4 | F2-3 vs. M2-3 | 249427_at | AT5G39850 | Ribosomal protein S4;(source:Araport11)                                                                                                                                                                                                                                                                                                                                                                                                                                                                                                                                                                                           | 159.06 | 416.55 | 0.38 | 2.10E-06 | 1.59E-04 |
| 3298 | 4 | F2-3 vs. M2-3 | 264443_at | AT1G27385 | phosphoribosylformylglycinamide synthase;(source:Araport11)                                                                                                                                                                                                                                                                                                                                                                                                                                                                                                                                                                       | 92.70  | 249.89 | 0.37 | 9.98E-04 | 6.17E-03 |
| 3299 | 4 | F2-3 vs. M2-3 | 266182_at | AT2G02370 | SNARE associated Golgi protein family;(source:Araport11)                                                                                                                                                                                                                                                                                                                                                                                                                                                                                                                                                                          | 42.29  | 113.11 | 0.37 | 6.50E-06 | 2.99E-04 |
| 3300 | 4 | F2-3 vs. M2-3 | 267561_at | AT2G45590 | Protein kinase superfamily protein;(source:Araport11)                                                                                                                                                                                                                                                                                                                                                                                                                                                                                                                                                                             | 123.48 | 336.30 | 0.37 | 1.98E-04 | 2.39E-03 |
| 3301 | 4 | F2-3 vs. M2-3 | 257702_at | AT3G12670 | Cytidine triphosphate synthase.                                                                                                                                                                                                                                                                                                                                                                                                                                                                                                                                                                                                   | 107.27 | 293.35 | 0.37 | 3.61E-04 | 3.37E-03 |
| 3302 | 4 | F2-3 vs. M2-3 | 258410_at | AT3G16780 | Ribosomal protein L19e family protein;(source:Araport11)                                                                                                                                                                                                                                                                                                                                                                                                                                                                                                                                                                          | 228.77 | 616.16 | 0.37 | 3.89E-05 | 9.38E-04 |
| 3303 | 4 | F2-3 vs. M2-3 | 257879_at | AT3G17160 | hypothetical protein;(source:Araport11)                                                                                                                                                                                                                                                                                                                                                                                                                                                                                                                                                                                           | 158.14 | 430.61 | 0.37 | 2.52E-04 | 2.82E-03 |
| 3304 | 4 | F2-3 vs. M2-3 | 249328_at | AT5G40820 | Encodes a Arabidopsis ortholog of the ATR protein kinase that is involved in a wide range of responses to DNA damage and plays a central role in cell-cycle regulation. Dominant loss of function alleles identified as suppressors of ALS also exhibit increased tolerance to aluminum. This may be due to the inhibition of terminal differentiation of the root apex upon exposure to Al. Polycomb group protein with zinc finger domain involved in negative regulation of reproductive development. Forms a complex with FIE, CLF, and MSI1. This complex modulates the expression of target genes including AG, PI and AP3. | 74.82  | 201.92 | 0.37 | 5.17E-05 | 1.13E-03 |
| 3305 | 4 | F2-3 vs. M2-3 | 248438_at | AT5G51230 | Eukaryotic aspartyl protease family protein;(source:Araport11)                                                                                                                                                                                                                                                                                                                                                                                                                                                                                                                                                                    | 180.72 | 489.55 | 0.37 | 3.10E-04 | 3.09E-03 |
| 3306 | 4 | F2-3 vs. M2-3 | 255727_at | AT1G25510 | hypothetical protein;(source:Araport11)                                                                                                                                                                                                                                                                                                                                                                                                                                                                                                                                                                                           | 68.77  | 190.35 | 0.36 | 1.46E-04 | 2.00E-03 |
| 3307 | 4 | F2-3 vs. M2-3 | 266229_at | AT2G28840 | RNA binding protein;(source:Araport11)                                                                                                                                                                                                                                                                                                                                                                                                                                                                                                                                                                                            | 29.53  | 81.89  | 0.36 | 7.69E-05 | 1.36E-03 |
| 3308 | 4 | F2-3 vs. M2-3 | 245512_at | AT4G15770 | hypothetical protein;(source:Araport11)                                                                                                                                                                                                                                                                                                                                                                                                                                                                                                                                                                                           | 77.72  | 214.49 | 0.36 | 1.66E-04 | 2.17E-03 |
| 3309 | 4 | F2-3 vs. M2-3 | 263631_at | AT2G04900 | Heavy metal transport/detoxification superfamily protein;(source:Araport11)                                                                                                                                                                                                                                                                                                                                                                                                                                                                                                                                                       | 33.30  | 94.60  | 0.35 | 3.81E-05 | 9.32E-04 |
| 3310 | 4 | F2-3 vs. M2-3 | 256621_at | AT3G24450 | Required for normal meiosis, may act in the last round of DNA replication prior to meiosis, sequence similar to yeast CDC45                                                                                                                                                                                                                                                                                                                                                                                                                                                                                                       | 45.38  | 128.79 | 0.35 | 5.64E-04 | 4.37E-03 |
| 3311 | 4 | F2-3 vs. M2-3 | 257813_at | AT3G25100 | Encodes a copine-like protein, which is a member of a newly identified class of calcium-dependent, phospholipid binding proteins that are present in a wide range of organisms. Overexpression of this gene suppresses bon1-1 phenotypes. Double mutant analyses with bon1-1 suggest that BON1 and BON3 have overlapping functions in maintaining cellular homeostasis and inhibiting cell death.                                                                                                                                                                                                                                 | 78.62  | 227.72 | 0.35 | 4.53E-04 | 3.88E-03 |
| 3312 | 4 | F2-3 vs. M2-3 | 264646_at | AT1G08860 | Encodes an ESCRT-related protein: CHMP1A/AT1G73030; CHMP1B/AT1G17730. CHMP1A and B mediate multivesicular body sorting of auxin carriers and are required for plant development. ESCRT: Endosomal Sorting Complexes Required For Transport machinery; CHMP: Charged Multivesicular Body Protein/Chromatin Modifying Protein.                                                                                                                                                                                                                                                                                                      | 26.22  | 78.21  | 0.34 | 4.90E-04 | 4.07E-03 |
| 3313 | 4 | F2-3 vs. M2-3 | 262367_at | AT1G73030 | Pentatricopeptide repeat (PPR) superfamily protein;(source:Araport11)                                                                                                                                                                                                                                                                                                                                                                                                                                                                                                                                                             | 122.32 | 364.19 | 0.34 | 1.34E-05 | 4.81E-04 |
| 3314 | 4 | F2-3 vs. M2-3 | 262941_at | AT1G79490 | Cyclophilin-like peptidyl-prolyl cis-trans isomerase family protein;(source:Araport11)                                                                                                                                                                                                                                                                                                                                                                                                                                                                                                                                            | 36.12  | 106.45 | 0.34 | 3.72E-05 | 9.26E-04 |
| 3315 | 4 | F2-3 vs. M2-3 | 260530_at | AT2G47320 | member of a novel family of plant-specific GATA-type transcription factors.                                                                                                                                                                                                                                                                                                                                                                                                                                                                                                                                                       | 134.12 | 394.17 | 0.34 | 9.30E-06 | 3.75E-04 |
| 3316 | 4 | F2-3 vs. M2-3 | 258041_at | AT3G21175 | encodes a 2-alkenal reductase (EC 1.3.1.74), plays a key role in the detoxification of reactive carbonyls                                                                                                                                                                                                                                                                                                                                                                                                                                                                                                                         | 38.18  | 113.96 | 0.34 | 5.23E-05 | 1.13E-03 |
| 3317 | 4 | F2-3 vs. M2-3 | 246463_at | AT5G16970 | Encodes WHY2, a homolog of the potato p24 protein. It shares the conserved KGKAAL domain, a putative DNA-binding domain, with potato p24 and is localized to mitochondria and not the nucleus. WHY2 is a member of the Whirly family proteins present mainly in the plant kingdom performing various activities related to DNA metabolism. Crystal structure of Solanum tuberosum WHY2, a close homolog of Arabidopsis WHY2, reveal that Whirly proteins bind to single strand DNA to promote accurate repair of DNA double-strand breaks over an error-prone repair pathway.                                                     | 39.35  | 117.35 | 0.34 | 3.00E-04 | 3.06E-03 |
| 3318 | 4 | F2-3 vs. M2-3 | 259942_at | AT1G71260 | Reticulon family protein;(source:Araport11)                                                                                                                                                                                                                                                                                                                                                                                                                                                                                                                                                                                       | 20.23  | 61.58  | 0.33 | 7.27E-04 | 5.09E-03 |
| 3319 | 4 | F2-3 vs. M2-3 | 259154_at | AT3G10260 | Putative membrane lipoprotein;(source:Araport11)                                                                                                                                                                                                                                                                                                                                                                                                                                                                                                                                                                                  | 245.86 | 755.59 | 0.33 | 1.17E-04 | 1.77E-03 |
| 3320 | 4 | F2-3 vs. M2-3 | 253753_at | AT4G29030 | Encodes plantacyanin one of blue copper proteins. Involved in anther development and pollination. Expressed in the transmitting tract of the pistil.                                                                                                                                                                                                                                                                                                                                                                                                                                                                              | 132.48 | 406.80 | 0.33 | 3.58E-04 | 3.36E-03 |
| 3321 | 4 | F2-3 vs. M2-3 | 267472_at | AT2G02850 | EID1 is an F-box protein that functions as a negative regulator in phytochrome A (phyA)-specific light signalling. Expressed at all stages of plant development independently of light conditions, localizes to the nucleus, and forms nuclear speckles under continuous far-red light. Forms stable dimeric and trimeric complexes with several ASK proteins and Cullin1 in yeast and in planta.                                                                                                                                                                                                                                 | 204.20 | 638.85 | 0.32 | 5.55E-04 | 4.36E-03 |
| 3322 | 4 | F2-3 vs. M2-3 | 255478_at | AT4G02440 |                                                                                                                                                                                                                                                                                                                                                                                                                                                                                                                                                                                                                                   | 67.07  | 209.71 | 0.32 | 8.20E-05 | 1.41E-03 |

|      |   |               |            |           |                                                                                                                                                                                                                                                                                                                                                                                                                                                                                                                                                                                                                                                                                                                               |        |         |      |          |          |
|------|---|---------------|------------|-----------|-------------------------------------------------------------------------------------------------------------------------------------------------------------------------------------------------------------------------------------------------------------------------------------------------------------------------------------------------------------------------------------------------------------------------------------------------------------------------------------------------------------------------------------------------------------------------------------------------------------------------------------------------------------------------------------------------------------------------------|--------|---------|------|----------|----------|
| 3323 | 4 | F2-3 vs. M2-3 | 250433_at  | AT5G10400 | Histone superfamily protein;(source:Araport11)                                                                                                                                                                                                                                                                                                                                                                                                                                                                                                                                                                                                                                                                                | 64.20  | 200.23  | 0.32 | 4.81E-04 | 4.01E-03 |
| 3324 | 4 | F2-3 vs. M2-3 | 249342_at  | AT5G40660 | ATP12 protein-like protein;(source:Araport11)                                                                                                                                                                                                                                                                                                                                                                                                                                                                                                                                                                                                                                                                                 | 60.86  | 190.68  | 0.32 | 3.90E-04 | 3.54E-03 |
|      |   |               | 262924_s_a |           |                                                                                                                                                                                                                                                                                                                                                                                                                                                                                                                                                                                                                                                                                                                               |        |         |      |          |          |
| 3325 | 4 | F2-3 vs. M2-3 | t          | AT1G75630 | vacuolar H <sup>+</sup> -pumping ATPase 16 kD proteolipid (ava-p) mRNA, The mRNA is cell-to-cell mobile.                                                                                                                                                                                                                                                                                                                                                                                                                                                                                                                                                                                                                      | 553.36 | 1801.11 | 0.31 | 4.27E-04 | 3.72E-03 |
| 3326 | 4 | F2-3 vs. M2-3 | 262969_at  | AT1G75710 | C2H2-like zinc finger protein;(source:Araport11)<br>AGAMOUS [AG]-like MADS box protein (AGL5) involved in fruit development (valve margin and dehiscence zone differentiation). A putative direct target of AG. SHP2 has been shown to be a downstream gene of the complex formed by AG and SEP proteins (SEP4 alone does not form a functional complex with AG).                                                                                                                                                                                                                                                                                                                                                             | 265.09 | 844.38  | 0.31 | 9.46E-05 | 1.55E-03 |
| 3327 | 4 | F2-3 vs. M2-3 | 263988_at  | AT2G42830 | Encodes a 22&#945; hydroxylase whose reaction is a rate-limiting step in brassinosteroid biosynthetic pathway. The protein is a member of CYP90B gene family. CLM is an epi-allele with small, compressed rosette, reduced internode length, and reduced fertility, appears in selfed ddm mutant plants possibly due to loss of cytosine methylation. Transcripts accumulate in actively growing tissues, and GUS expression is negatively regulated by brassinosteroids. Localized in the endoplasmic reticulum. The in vitro expressed protein can perform the C-22 hydroxylation of a variety of C27-, C28- and C29-sterols. Cholesterol was the best substrate, followed by campesterol. Sitosterol was a poor substrate. | 95.58  | 311.90  | 0.31 | 1.09E-04 | 1.70E-03 |
| 3328 | 4 | F2-3 vs. M2-3 | 252184_at  | AT3G50660 | Encodes FERRITIN 3, AtFER3. Ferritins are a class of 24-mer multi-meric proteins found in all kingdoms of life. Function as the main iron store in mammals. Evidence suggests that Arabidopsis ferritins are essential to protect cells against oxidative damage, but they do not constitute the major iron pool.                                                                                                                                                                                                                                                                                                                                                                                                             | 155.25 | 493.83  | 0.31 | 6.90E-04 | 4.94E-03 |
| 3329 | 4 | F2-3 vs. M2-3 | 251735_at  | AT3G56090 | polymerase delta 4;(source:Araport11)                                                                                                                                                                                                                                                                                                                                                                                                                                                                                                                                                                                                                                                                                         | 99.64  | 323.43  | 0.31 | 8.68E-04 | 5.68E-03 |
| 3330 | 4 | F2-3 vs. M2-3 | 264674_at  | AT1G09815 | Putative flavin monooxygenase.                                                                                                                                                                                                                                                                                                                                                                                                                                                                                                                                                                                                                                                                                                | 39.37  | 136.10  | 0.29 | 7.55E-05 | 1.36E-03 |
| 3331 | 4 | F2-3 vs. M2-3 | 261023_at  | AT1G12200 | chromatin modification-like protein;(source:Araport11)                                                                                                                                                                                                                                                                                                                                                                                                                                                                                                                                                                                                                                                                        | 13.84  | 47.34   | 0.29 | 3.91E-04 | 3.54E-03 |
| 3332 | 4 | F2-3 vs. M2-3 | 261019_at  | AT1G26470 | hypothetical protein;(source:Araport11)                                                                                                                                                                                                                                                                                                                                                                                                                                                                                                                                                                                                                                                                                       | 29.70  | 101.18  | 0.29 | 4.98E-04 | 4.10E-03 |
| 3333 | 4 | F2-3 vs. M2-3 | 263151_at  | AT1G54120 | Although this enzyme is predicted to encode a strictosidine synthase (SS), it lacks a conserved catalytic glutamate residue found in active SS enzymes and it is not expected to have SS activity. Encodes a sterol C-14 reductase required for cell division and expansion and is involved in proper organization of the embryo.                                                                                                                                                                                                                                                                                                                                                                                             | 44.20  | 152.36  | 0.29 | 2.42E-04 | 2.74E-03 |
| 3334 | 4 | F2-3 vs. M2-3 | 266391_at  | AT2G41290 | Plant invertase/pectin methylesterase inhibitor superfamily protein;(source:Araport11)                                                                                                                                                                                                                                                                                                                                                                                                                                                                                                                                                                                                                                        | 184.11 | 652.49  | 0.28 | 6.70E-06 | 3.01E-04 |
| 3335 | 4 | F2-3 vs. M2-3 | 251995_at  | AT3G52940 | Encodes a member of the MAP Kinase Kinase family of proteins. It can phosphorylate MPK12 in vitro and it can be dephosphorylated by MKP2 in vitro.                                                                                                                                                                                                                                                                                                                                                                                                                                                                                                                                                                            | 57.31  | 204.33  | 0.28 | 2.16E-04 | 2.53E-03 |
| 3336 | 4 | F2-3 vs. M2-3 | 246002_at  | AT5G20740 | SPT4 homolog 2;(source:Araport11)                                                                                                                                                                                                                                                                                                                                                                                                                                                                                                                                                                                                                                                                                             | 279.45 | 980.59  | 0.28 | 8.22E-04 | 5.49E-03 |
| 3337 | 4 | F2-3 vs. M2-3 | 247962_at  | AT5G56580 | Encodes a nitrile-specifier protein NSP4. NSP4 is one out of five (At3g16400/NSP1, At2g33070/NSP2, At3g16390/NSP3, At3g16410/NSP4 and At5g48180/NSP5) A. thaliana epithiospecifier protein (ESP) homologues that promote simple nitrile, but not epithionitrile or thiocyanate formation. The mRNA is cell-to-cell mobile.                                                                                                                                                                                                                                                                                                                                                                                                    | 57.14  | 213.94  | 0.27 | 3.90E-04 | 3.54E-03 |
| 3338 | 4 | F2-3 vs. M2-3 | 247355_at  | AT5G63670 | CDK-subunit 2;(source:Araport11)                                                                                                                                                                                                                                                                                                                                                                                                                                                                                                                                                                                                                                                                                              | 53.62  | 198.76  | 0.27 | 1.33E-04 | 1.89E-03 |
|      |   |               | 259381_s_a |           |                                                                                                                                                                                                                                                                                                                                                                                                                                                                                                                                                                                                                                                                                                                               |        |         |      |          |          |
| 3339 | 4 | F2-3 vs. M2-3 | t          | AT3G16410 | serine protease, putative (Protein of unknown function, DUF538);(source:Araport11)                                                                                                                                                                                                                                                                                                                                                                                                                                                                                                                                                                                                                                            | 27.97  | 108.52  | 0.26 | 3.14E-05 | 8.40E-04 |
| 3340 | 4 | F2-3 vs. M2-3 | 264061_at  | AT2G27970 | Encodes a member of a plant specific family of cyclin dependent kinases.                                                                                                                                                                                                                                                                                                                                                                                                                                                                                                                                                                                                                                                      | 102.69 | 408.45  | 0.25 | 8.42E-04 | 5.55E-03 |
| 3341 | 4 | F2-3 vs. M2-3 | 265005_at  | AT1G61667 | ATPase E1-E2 type family protein / haloacid dehalogenase-like hydrolase family protein;(source:Araport11)                                                                                                                                                                                                                                                                                                                                                                                                                                                                                                                                                                                                                     | 33.43  | 138.15  | 0.24 | 7.81E-04 | 5.31E-03 |
| 3342 | 4 | F2-3 vs. M2-3 | 266401_s_a | AT2G38620 | During the course of seed coat epidermal cell differentiation, COBRA-LIKE 2 plays a role in cellulose deposition into mucilage secretory cells of Arabidopsis seeds. COBRA-LIKE 2 affects mucilage solubility and cellulosic ray formation.                                                                                                                                                                                                                                                                                                                                                                                                                                                                                   | 115.91 | 487.01  | 0.24 | 2.77E-04 | 2.98E-03 |
| 3343 | 4 | F2-3 vs. M2-3 | 257224_at  | AT3G27870 | Bifunctional inhibitor/lipid-transfer protein/seed storage 2S albumin superfamily protein;(source:Araport11)                                                                                                                                                                                                                                                                                                                                                                                                                                                                                                                                                                                                                  | 30.56  | 126.98  | 0.24 | 1.23E-04 | 1.82E-03 |
| 3344 | 4 | F2-3 vs. M2-3 | 245228_at  | AT3G29810 | Encodes a member of KPP-like gene family, homolog of KPP (kinase partner protein) gene in tomato. Also a member of the RopGEF (guanine nucleotide exchange factor) family, containing the novel PRONE domain (plant-specific Rop nucleotide exchanger), which is exclusively active towards members of the Rop subfamily.                                                                                                                                                                                                                                                                                                                                                                                                     | 21.14  | 89.67   | 0.24 | 1.64E-04 | 2.16E-03 |
| 3345 | 4 | F2-3 vs. M2-3 | 266123_at  | AT2G45180 | Vacuolar import/degradation, Vid27-related protein;(source:Araport11)                                                                                                                                                                                                                                                                                                                                                                                                                                                                                                                                                                                                                                                         | 22.14  | 94.26   | 0.23 | 2.18E-04 | 2.55E-03 |
| 3346 | 4 | F2-3 vs. M2-3 | 251778_at  | AT3G55660 | Leucine-rich repeat (LRR) family protein;(source:Araport11)                                                                                                                                                                                                                                                                                                                                                                                                                                                                                                                                                                                                                                                                   | 50.54  | 215.93  | 0.23 | 3.50E-05 | 9.16E-04 |
| 3347 | 4 | F2-3 vs. M2-3 | 253357_at  | AT4G33400 |                                                                                                                                                                                                                                                                                                                                                                                                                                                                                                                                                                                                                                                                                                                               | 209.61 | 953.72  | 0.22 | 7.53E-04 | 5.17E-03 |
| 3348 | 4 | F2-3 vs. M2-3 | 249832_at  | AT5G23400 |                                                                                                                                                                                                                                                                                                                                                                                                                                                                                                                                                                                                                                                                                                                               | 17.30  | 85.02   | 0.20 | 2.34E-04 | 2.68E-03 |

|      |   |               |            |           |                                                                                                                                                                                                                                                                                                                                                                                                                                                                                                                           |         |         |       |          |          |
|------|---|---------------|------------|-----------|---------------------------------------------------------------------------------------------------------------------------------------------------------------------------------------------------------------------------------------------------------------------------------------------------------------------------------------------------------------------------------------------------------------------------------------------------------------------------------------------------------------------------|---------|---------|-------|----------|----------|
| 3349 | 4 | F2-3 vs. M2-3 | 260181_at  | AT1G70710 | endo-1,4-beta-glucanase. Involved in cell elongation.                                                                                                                                                                                                                                                                                                                                                                                                                                                                     | 120.00  | 647.99  | 0.19  | 5.97E-04 | 4.51E-03 |
| 3350 | 4 | F2-3 vs. M2-3 | 246923_at  | AT5G25100 | Endomembrane protein 70 protein family;(source:Araport11)                                                                                                                                                                                                                                                                                                                                                                                                                                                                 | 20.83   | 109.57  | 0.19  | 8.56E-04 | 5.62E-03 |
| 3351 | 4 | F2-3 vs. M2-3 | 261650_at  | AT1G27770 | Encodes a chloroplast envelope Ca2+-ATPase with an N-terminal autoinhibitor. encodes a member of xyloglucan endotransglucosylase/hydrolases (XTHs) that catalyze the cleavage and molecular grafting of xyloglucan chains function in loosening and rearrangement of the cell wall. Gene is expressed in shoot apex region, flower buds, flower stalks and internodes bearing flowers.                                                                                                                                    | 21.30   | 123.76  | 0.17  | 1.36E-05 | 4.85E-04 |
| 3352 | 4 | F2-3 vs. M2-3 | 255433_at  | AT4G03210 | Cyclin-dependent kinase, expressed in flowers and suspension cell culture, expression peaks during M phase in synchronized cultures. Required for proper organization of the shoot apical meristem and for hormone signaling. Expressed in the shoot apical meristem. Involved in regulation of the G2/M transition of the mitotic cell cycle.                                                                                                                                                                            | 129.27  | 778.46  | 0.17  | 6.30E-06 | 2.98E-04 |
| 3353 | 4 | F2-3 vs. M2-3 | 262802_at  | AT1G20930 | Encodes a cold-inducible cationic peroxidase that is involved in the stress response. In response to low temperature, RCI3 transcripts accumulate in the aerial part and in roots of etiolated seedlings but only in roots of light-grown seedlings. The mRNA is cell-to-cell mobile.                                                                                                                                                                                                                                     | 36.06   | 243.14  | 0.15  | 1.05E-04 | 1.67E-03 |
| 3354 | 4 | F2-3 vs. M2-3 | 264577_at  | AT1G05260 | Protein kinase superfamily protein;(source:Araport11)                                                                                                                                                                                                                                                                                                                                                                                                                                                                     | 51.40   | 389.20  | 0.13  | 8.63E-05 | 1.45E-03 |
| 3355 | 4 | F2-3 vs. M2-3 | 259541_at  | AT1G20650 | aluminum induced protein with YGL and LRDR motifs;(source:Araport11)                                                                                                                                                                                                                                                                                                                                                                                                                                                      | 24.87   | 201.38  | 0.12  | 4.15E-04 | 3.66E-03 |
| 3356 | 4 | F2-3 vs. M2-3 | 253874_at  | AT4G27450 | alpha/beta-Hydrolases superfamily protein;(source:Araport11)                                                                                                                                                                                                                                                                                                                                                                                                                                                              | 50.18   | 411.65  | 0.12  | 6.40E-06 | 2.99E-04 |
| 3357 | 4 | F2-3 vs. M2-3 | 246203_at  | AT4G36610 | Encodes a member of the cytochrome p450 family that serves as a control point between multiple photoreceptor systems and brassinosteroid signal transduction. Involved in brassinolide metabolism. Mediates response to a variety of light signals including hypocotyl elongation and cotyledon expansion.                                                                                                                                                                                                                | 32.31   | 267.90  | 0.12  | 2.61E-04 | 2.88E-03 |
| 3358 | 4 | F2-3 vs. M2-3 | 267614_at  | AT2G26710 | encodes a thaumatin-like protein                                                                                                                                                                                                                                                                                                                                                                                                                                                                                          | 12.67   | 115.06  | 0.11  | 7.70E-05 | 1.36E-03 |
| 3359 | 4 | F2-3 vs. M2-3 | 256125_at  | AT1G18250 | One of two genes (SHP1 and SHP2) that are required for fruit dehiscence. The two genes control dehiscence zone differentiation and promote the lignification of adjacent cells. Belongs to the group of plant flotillins, which are plasma membrane proteins. Flot3 is found in membrane nanodomains.                                                                                                                                                                                                                     | 38.92   | 381.77  | 0.10  | 2.03E-05 | 6.41E-04 |
| 3360 | 4 | F2-3 vs. M2-3 | 251555_at  | AT3G58780 | ATPase subunit 6                                                                                                                                                                                                                                                                                                                                                                                                                                                                                                          | 82.37   | 833.16  | 0.10  | 1.38E-05 | 4.89E-04 |
| 3361 | 4 | F2-3 vs. M2-3 | 247208_at  | AT5G64870 |                                                                                                                                                                                                                                                                                                                                                                                                                                                                                                                           | 79.98   | 866.65  | 0.09  | 1.50E-06 | 1.24E-04 |
| 3362 | 4 | F2-3 vs. M2-3 | 266012_s_a | ATMG00410 |                                                                                                                                                                                                                                                                                                                                                                                                                                                                                                                           | 69.79   | 771.71  | 0.09  | 4.53E-05 | 1.05E-03 |
| 3363 | 4 | F2-3 vs. M2-3 | 255014_at  | AT4G09960 | Encodes a MADS box transcription factor expressed in the carpel and ovules. Plays a maternal role in fertilization and seed development. Controls the structure and mechanical properties of the seed coat. Controls fruit size by regulating cytokinin levels and FRUITFULL. Similar to myrosinase binding proteins which may be involved in metabolizing glucosinolates and forming defense compounds to protect against herbivory. Also similar to lectins and other agglutinating factors. Expressed only in flowers. | 32.02   | 372.80  | 0.09  | 9.00E-07 | 1.02E-04 |
| 3364 | 4 | F2-3 vs. M2-3 | 265058_s_a | AT1G52030 | transmembrane protein;(source:Araport11)                                                                                                                                                                                                                                                                                                                                                                                                                                                                                  | 104.12  | 1365.63 | 0.08  | 2.49E-04 | 2.80E-03 |
| 3365 | 4 | F2-3 vs. M2-3 | 257334_at  | ATMG01370 | Ribosomal protein L30/L7 family protein;(source:Araport11)                                                                                                                                                                                                                                                                                                                                                                                                                                                                | 34.23   | 611.61  | 0.06  | 3.55E-05 | 9.20E-04 |
| 3366 | 4 | F2-3 vs. M2-3 | 256648_at  | AT3G13580 | Ribosomal protein L30/L7 family protein;(source:Araport11)                                                                                                                                                                                                                                                                                                                                                                                                                                                                | 20.65   | 1432.78 | 0.01  | 3.40E-06 | 2.16E-04 |
| 3367 | 5 | L2-3 vs. S2-3 | 256648_at  | AT3G13580 |                                                                                                                                                                                                                                                                                                                                                                                                                                                                                                                           | 1287.46 | 19.48   | 66.1  | 6.40E-06 | 5.27E-03 |
| 3368 | 5 | L2-3 vs. S2-3 | 245026_at  | ATCG00140 | ATPase III subunit                                                                                                                                                                                                                                                                                                                                                                                                                                                                                                        | 2472.88 | 54.19   | 45.63 | 1.99E-05 | 5.48E-03 |
| 3369 | 5 | L2-3 vs. S2-3 | 252321_at  | AT3G48510 | ABA&#8208;induced transcription repressor that acts as feedback regulator in ABA signalling.                                                                                                                                                                                                                                                                                                                                                                                                                              | 919.76  | 31.2    | 29.48 | 1.18E-04 | 9.20E-03 |
| 3370 | 5 | L2-3 vs. S2-3 | 244959_s_a | AT2G07708 | hypothetical protein;(source:Araport11) Encodes a high affinity H+<i>myo</i>-inositol symporter. The only other compound shown to be transported was pinitol, a methylated derivative of <i>myo</i>-inositol. The mRNA is cell-to-cell mobile.                                                                                                                                                                                                                                                                            | 300.84  | 21.09   | 14.26 | 3.66E-04 | 1.19E-02 |
| 3371 | 5 | L2-3 vs. S2-3 | 245499_at  | AT4G16480 |                                                                                                                                                                                                                                                                                                                                                                                                                                                                                                                           | 493.5   | 49.91   | 9.89  | 2.87E-05 | 6.15E-03 |
| 3372 | 5 | L2-3 vs. S2-3 | 267607_s_a | AT2G26740 | Encodes a soluble epoxide hydrolase whose expression is induced by auxin and water stress.                                                                                                                                                                                                                                                                                                                                                                                                                                | 102.92  | 13.14   | 7.83  | 1.26E-04 | 9.27E-03 |
| 3373 | 5 | L2-3 vs. S2-3 | 245010_at  | ATCG00420 | Encodes NADH dehydrogenase subunit J. Its transcription is increased upon sulfur depletion.                                                                                                                                                                                                                                                                                                                                                                                                                               | 188.77  | 26.58   | 7.1   | 5.58E-04 | 1.45E-02 |
| 3374 | 5 | L2-3 vs. S2-3 | 252095_at  | AT3G51000 | alpha/beta-Hydrolases superfamily protein;(source:Araport11)                                                                                                                                                                                                                                                                                                                                                                                                                                                              | 179.01  | 27.07   | 6.61  | 1.55E-04 | 1.02E-02 |
| 3375 | 5 | L2-3 vs. S2-3 | 265929_s_a | AT2G18570 | UDP-Glycosyltransferase superfamily protein;(source:Araport11)                                                                                                                                                                                                                                                                                                                                                                                                                                                            | 85.08   | 13.22   | 6.43  | 9.73E-04 | 1.79E-02 |
| 3376 | 5 | L2-3 vs. S2-3 | 244972_at  | ATCG00680 | encodes for CP47, subunit of the photosystem II reaction center.                                                                                                                                                                                                                                                                                                                                                                                                                                                          | 94.71   | 16.45   | 5.76  | 3.67E-04 | 1.19E-02 |

|      |   |               |             |           |                                                                                                                                                                                                                                                                                                                                                                                                                                                                                                                                                                                                                                                                                                                               |         |         |      |          |          |
|------|---|---------------|-------------|-----------|-------------------------------------------------------------------------------------------------------------------------------------------------------------------------------------------------------------------------------------------------------------------------------------------------------------------------------------------------------------------------------------------------------------------------------------------------------------------------------------------------------------------------------------------------------------------------------------------------------------------------------------------------------------------------------------------------------------------------------|---------|---------|------|----------|----------|
| 3377 | 5 | L2-3 vs. S2-3 | 254824_s_at | AT4G12620 | Origin Recognition Complex subunit 1b. Involved in the initiation of DNA replication. Regulated transcriptionally during cell cycle, peaking at G1/S-phase. Target of E2F/DF family of transcription factors. Interacts with ORC2 and ORC5. Highly expressed in proliferating cells. Expression levels are independent of light regime.                                                                                                                                                                                                                                                                                                                                                                                       | 428.47  | 75.7    | 5.66 | 3.10E-05 | 6.15E-03 |
| 3378 | 5 | L2-3 vs. S2-3 | 247208_at   | AT5G64870 | Belongs to the group of plant flotillins, which are plasma membrane proteins. Flot3 is found in membrane nanodomains.                                                                                                                                                                                                                                                                                                                                                                                                                                                                                                                                                                                                         | 1033.03 | 214.23  | 4.82 | 2.00E-05 | 5.48E-03 |
| 3379 | 5 | L2-3 vs. S2-3 | 258321_at   | AT3G22840 | Encodes an early light-inducible protein.<br>Encodes a vacuolar processing enzyme belonging to a novel group of cysteine proteinases that is expressed in vegetative organs and is upregulated in association with various types of cell death and under stressed conditions.                                                                                                                                                                                                                                                                                                                                                                                                                                                 | 125.75  | 26.88   | 4.68 | 3.93E-05 | 6.43E-03 |
| 3380 | 5 | L2-3 vs. S2-3 | 266849_at   | AT2G25940 | member of a novel family of plant-specific GATA-type transcription factors.                                                                                                                                                                                                                                                                                                                                                                                                                                                                                                                                                                                                                                                   | 132.96  | 28.81   | 4.62 | 2.12E-04 | 1.07E-02 |
| 3381 | 5 | L2-3 vs. S2-3 | 258041_at   | AT3G21175 |                                                                                                                                                                                                                                                                                                                                                                                                                                                                                                                                                                                                                                                                                                                               | 92.27   | 20.28   | 4.55 | 2.76E-04 | 1.13E-02 |
| 3382 | 5 | L2-3 vs. S2-3 | 247033_at   | AT5G67250 | Encodes an SKP1 interacting partner (SKIP2).Encodes an F-box protein. Based on genetic analysis appears to be functionally redundant with VFB1,2, and 3. When expression of all 4 genes is reduced plants show defects in growth and reduced expression of auxin response genes.                                                                                                                                                                                                                                                                                                                                                                                                                                              | 481.1   | 120.27  | 4    | 1.23E-04 | 9.20E-03 |
| 3383 | 5 | L2-3 vs. S2-3 | 244966_at   | ATCG00590 | electron carrier;(source:Araport11)<br>Encodes glutathione transferase belonging to the tau class of GSTs. Naming convention according to Wagner et al. (2002).                                                                                                                                                                                                                                                                                                                                                                                                                                                                                                                                                               | 54.87   | 15.16   | 3.62 | 2.12E-04 | 1.07E-02 |
| 3384 | 5 | L2-3 vs. S2-3 | 260745_at   | AT1G78370 | Aldolase superfamily protein;(source:Araport11)                                                                                                                                                                                                                                                                                                                                                                                                                                                                                                                                                                                                                                                                               | 65.43   | 18.08   | 3.62 | 3.97E-04 | 1.24E-02 |
| 3385 | 5 | L2-3 vs. S2-3 | 260967_at   | AT1G12230 | PATATIN-like protein 6;(source:Araport11)                                                                                                                                                                                                                                                                                                                                                                                                                                                                                                                                                                                                                                                                                     | 368.48  | 103.3   | 3.57 | 2.33E-04 | 1.08E-02 |
| 3386 | 5 | L2-3 vs. S2-3 | 267012_at   | AT2G39220 | member of Cyclic nucleotide gated channel family                                                                                                                                                                                                                                                                                                                                                                                                                                                                                                                                                                                                                                                                              | 656.18  | 190.71  | 3.44 | 7.66E-05 | 7.98E-03 |
| 3387 | 5 | L2-3 vs. S2-3 | 248250_at   | AT5G53130 |                                                                                                                                                                                                                                                                                                                                                                                                                                                                                                                                                                                                                                                                                                                               | 196.02  | 57.19   | 3.43 | 8.89E-05 | 8.40E-03 |
| 3388 | 5 | L2-3 vs. S2-3 | 252184_at   | AT3G50660 | Encodes a 22&#945; hydroxylase whose reaction is a rate-limiting step in brassinosteroid biosynthetic pathway. The protein is a member of CYP90B gene family. CLM is an epi-allele with small, compressed rosette, reduced internode length, and reduced fertility, appears in selfed ddm mutant plants possibly due to loss of cytosine methylation. Transcripts accumulate in actively growing tissues, and GUS expression is negatively regulated by brassinosteroids. Localized in the endoplasmic reticulum. The in vitro expressed protein can perform the C-22 hydroxylation of a variety of C27-, C28- and C29-sterols. Cholesterol was the best substrate, followed by campesterol. Sitosterol was a poor substrate. | 425.54  | 125.19  | 3.4  | 3.04E-05 | 6.15E-03 |
| 3389 | 5 | L2-3 vs. S2-3 | 244963_at   | ATCG00560 | PSII L protein                                                                                                                                                                                                                                                                                                                                                                                                                                                                                                                                                                                                                                                                                                                | 4392.72 | 1319.79 | 3.33 | 9.33E-04 | 1.77E-02 |
| 3390 | 5 | L2-3 vs. S2-3 | 257816_at   | AT3G25140 | Quasimodo1, encodes a glycosyltransferase, involved in homogalacturonan biosynthesis; mutant shows cell adhesion defect and lower wall uronic acid content. The mRNA is cell-to-cell mobile. Encodes a mitochondrial succinic semialdehyde dehydrogenase (SSADH). Nomenclature according to Kirch, et al (2004).                                                                                                                                                                                                                                                                                                                                                                                                              | 127.11  | 38.69   | 3.29 | 8.55E-04 | 1.75E-02 |
| 3391 | 5 | L2-3 vs. S2-3 | 262892_at   | AT1G79440 | C2H2-like zinc finger protein;(source:Araport11)                                                                                                                                                                                                                                                                                                                                                                                                                                                                                                                                                                                                                                                                              | 84.52   | 26.05   | 3.24 | 6.15E-04 | 1.51E-02 |
| 3392 | 5 | L2-3 vs. S2-3 | 260997_at   | AT1G26610 |                                                                                                                                                                                                                                                                                                                                                                                                                                                                                                                                                                                                                                                                                                                               | 77.32   | 24.1    | 3.21 | 5.28E-04 | 1.42E-02 |
| 3393 | 5 | L2-3 vs. S2-3 | 251885_at   | AT3G54050 | Encodes a chloroplastic fructose 1,6-bisphosphate phosphatase. also known as HCEF1 (High Cyclic Electron Flow 1). hcef1 mutants have constitutively elevated electron flow (CEFI) and plants with antisense suppression of this enzyme have higher levels of net leaf photosynthesis and increased sucrose biosynthesis. The mRNA is cell-to-cell mobile.                                                                                                                                                                                                                                                                                                                                                                     | 268.95  | 88.98   | 3.02 | 8.90E-04 | 1.75E-02 |
| 3394 | 5 | L2-3 vs. S2-3 | 251386_at   | AT3G60800 | Encodes a protein S-acyltransferase that, together with PAT13, cooperatively regulates leaf senescence.                                                                                                                                                                                                                                                                                                                                                                                                                                                                                                                                                                                                                       | 68.64   | 22.79   | 3.01 | 6.15E-04 | 1.51E-02 |
| 3395 | 5 | L2-3 vs. S2-3 | 244962_at   | ATCG01050 | Represents a plastid-encoded subunit of a NAD(P)H dehydrogenase complex. Its mRNA is edited at four positions. Translation data is not available for this gene.                                                                                                                                                                                                                                                                                                                                                                                                                                                                                                                                                               | 45.69   | 15.22   | 3    | 8.31E-04 | 1.74E-02 |
| 3396 | 5 | L2-3 vs. S2-3 | 245002_at   | ATCG00270 | PSII D2 protein                                                                                                                                                                                                                                                                                                                                                                                                                                                                                                                                                                                                                                                                                                               | 99.21   | 33.37   | 2.97 | 9.90E-04 | 1.79E-02 |
| 3397 | 5 | L2-3 vs. S2-3 | 246017_at   | AT5G10730 | NAD(P)-binding Rossmann-fold superfamily protein;(source:Araport11)                                                                                                                                                                                                                                                                                                                                                                                                                                                                                                                                                                                                                                                           | 164.45  | 58.74   | 2.8  | 6.08E-04 | 1.51E-02 |
| 3398 | 5 | L2-3 vs. S2-3 | 262785_at   | AT1G10750 | carboxyl-terminal peptidase, putative (DUF239);(source:Araport11)                                                                                                                                                                                                                                                                                                                                                                                                                                                                                                                                                                                                                                                             | 159.53  | 57.57   | 2.77 | 3.56E-04 | 1.19E-02 |
| 3399 | 5 | L2-3 vs. S2-3 | 254188_at   | AT4G23920 | Encodes a protein with UDP-D-glucose 4-epimerase activity. Involved in growth and cell wall carbohydrate biosynthesis.                                                                                                                                                                                                                                                                                                                                                                                                                                                                                                                                                                                                        | 140.26  | 50.78   | 2.76 | 2.22E-04 | 1.07E-02 |

|      |   |               |           |           |                                                                                                                                                                                                                                                                                                                                                                                                                                                                                                               |         |         |      |          |          |
|------|---|---------------|-----------|-----------|---------------------------------------------------------------------------------------------------------------------------------------------------------------------------------------------------------------------------------------------------------------------------------------------------------------------------------------------------------------------------------------------------------------------------------------------------------------------------------------------------------------|---------|---------|------|----------|----------|
| 3400 | 5 | L2-3 vs. S2-3 | 265182_at | AT1G23740 | AOR is an alkenal/one oxidoreductase that acts on compounds with unsaturated alpha,beta-carbonyls. The activity of this enzyme with a number of substrates, including acrolein and 3-buten-2-one, was demonstrated in vitro using a truncated form of the protein that lacked approximately 80 of the first amino acids. This protein appears to localize to the chloroplast where it likely helps to maintain the photosynthetic process by detoxifying reactive carbonyls formed during lipid peroxidation. | 120.09  | 43.57   | 2.76 | 2.43E-04 | 1.09E-02 |
| 3401 | 5 | L2-3 vs. S2-3 | 256161_at | AT1G30090 | Galactose oxidase/kelch repeat superfamily protein;(source:Araport11)                                                                                                                                                                                                                                                                                                                                                                                                                                         | 115     | 41.89   | 2.75 | 5.33E-04 | 1.43E-02 |
| 3402 | 5 | L2-3 vs. S2-3 | 256246_at | AT3G66658 | Encodes a putative aldehyde dehydrogenase. The gene is not responsive to osmotic stress and is expressed constitutively at a low level in plantlets and root cultures.                                                                                                                                                                                                                                                                                                                                        | 130.62  | 47.68   | 2.74 | 2.76E-04 | 1.13E-02 |
| 3403 | 5 | L2-3 vs. S2-3 | 263047_at | AT2G17630 | Pyridoxal phosphate (PLP)-dependent transferases superfamily protein;(source:Araport11)                                                                                                                                                                                                                                                                                                                                                                                                                       | 202.18  | 73.9    | 2.74 | 8.38E-04 | 1.74E-02 |
| 3404 | 5 | L2-3 vs. S2-3 | 245993_at | AT5G20700 | senescence-associated family protein, putative (DUF581);(source:Araport11)                                                                                                                                                                                                                                                                                                                                                                                                                                    | 150.85  | 55.33   | 2.73 | 9.04E-05 | 8.40E-03 |
| 3405 | 5 | L2-3 vs. S2-3 | 261601_at | AT1G49670 | molecular function has not been defined. Was shown involved in oxidative stress tolerance.                                                                                                                                                                                                                                                                                                                                                                                                                    | 77.32   | 28.37   | 2.72 | 4.36E-04 | 1.30E-02 |
| 3406 | 5 | L2-3 vs. S2-3 | 265985_at | AT2G24220 | Member of a family of proteins related to PUP1, a purine transporter. May be involved in the transport of purine and purine derivatives such as cytokinins, across the plasma membrane.                                                                                                                                                                                                                                                                                                                       | 139.12  | 52.17   | 2.67 | 6.25E-05 | 7.20E-03 |
| 3407 | 5 | L2-3 vs. S2-3 | 263954_at | AT2G35840 | Sucrose-6F-phosphate phosphohydrolase family protein;(source:Araport11)                                                                                                                                                                                                                                                                                                                                                                                                                                       | 218.79  | 81.95   | 2.67 | 1.22E-04 | 9.20E-03 |
| 3408 | 5 | L2-3 vs. S2-3 | 248838_at | AT5G46800 | Seedling lethal mutation; Mitochondrial Carnitine Acyl Carrier-Like Protein                                                                                                                                                                                                                                                                                                                                                                                                                                   | 172.48  | 67.37   | 2.56 | 9.30E-04 | 1.77E-02 |
| 3409 | 5 | L2-3 vs. S2-3 | 262819_at | AT1G11600 | member of CYP77B                                                                                                                                                                                                                                                                                                                                                                                                                                                                                              | 412.34  | 167.42  | 2.46 | 8.66E-04 | 1.75E-02 |
| 3410 | 5 | L2-3 vs. S2-3 | 246198_at | AT4G36810 | Encodes a protein with geranylgeranyl pyrophosphate synthase activity involved in isoprenoid biosynthesis. The enzyme appears to be targeted to the chloroplast in epidermal cells and guard cells of leaves, and in etioplasts in roots. The mRNA is cell-to-cell mobile.                                                                                                                                                                                                                                    | 91.92   | 37.75   | 2.44 | 4.05E-05 | 6.43E-03 |
| 3411 | 5 | L2-3 vs. S2-3 | 265763_at | AT2G48060 | piezo-type mechanosensitive ion channel component;(source:Araport11)                                                                                                                                                                                                                                                                                                                                                                                                                                          | 279.95  | 114.59  | 2.44 | 2.09E-04 | 1.07E-02 |
| 3412 | 5 | L2-3 vs. S2-3 | 247238_at | AT5G64610 | Encodes an enzyme with histone acetyltransferase activity. HAM1 primarily acetylate histone H4, but also display some ability to acetylate H3. Prior acetylation of lysine 5 on histone H4 reduces radioactive acetylation by either HAM1. HAM1 acetylates histone H4 lysine 5.                                                                                                                                                                                                                               | 168.05  | 68.93   | 2.44 | 9.15E-04 | 1.77E-02 |
| 3413 | 5 | L2-3 vs. S2-3 | 255834_at | AT2G33410 | Belongs to a member of the RNA-binding glycine-rich (RBG) gene superfamily. The mRNA is cell-to-cell mobile.                                                                                                                                                                                                                                                                                                                                                                                                  | 580.81  | 240.01  | 2.42 | 8.56E-05 | 8.36E-03 |
| 3414 | 5 | L2-3 vs. S2-3 | 245868_at | AT1G58030 | Encodes a member of the cationic amino acid transporter (CAT) subfamily of amino acid polyamine choline transporters. Localized to the tonoplast.                                                                                                                                                                                                                                                                                                                                                             | 56.63   | 23.72   | 2.39 | 3.35E-05 | 6.23E-03 |
| 3415 | 5 | L2-3 vs. S2-3 | 266225_at | AT2G28900 | Encodes AtOEP16, a 16-KDa plastid outer membrane protein involved in plastid import of protochlorophyllide oxidoreductase A. Predominantly expressed in leaves and is also inducible by cold treatment.                                                                                                                                                                                                                                                                                                       | 443.23  | 189.34  | 2.34 | 2.68E-04 | 1.12E-02 |
| 3416 | 5 | L2-3 vs. S2-3 | 247228_at | AT5G65140 | Haloacid dehalogenase-like hydrolase (HAD) superfamily protein;(source:Araport11)                                                                                                                                                                                                                                                                                                                                                                                                                             | 113.61  | 49.06   | 2.32 | 1.74E-04 | 1.02E-02 |
| 3417 | 5 | L2-3 vs. S2-3 | 254874_at | AT4G11570 | Encodes plastid localized protein involved in riboflavin biosynthesis. It dephosphorylates 5-amino-6-ribitylamino- 2,4(1H,3H) pyrimidinedione 5&#8242;-phosphate (ARPP) .                                                                                                                                                                                                                                                                                                                                     | 300.28  | 132.47  | 2.27 | 1.04E-04 | 9.04E-03 |
| 3418 | 5 | L2-3 vs. S2-3 | 258044_at | AT3G21270 | Encodes Dof zinc finger protein adof2.                                                                                                                                                                                                                                                                                                                                                                                                                                                                        | 112.09  | 50.11   | 2.24 | 4.34E-04 | 1.30E-02 |
| 3419 | 5 | L2-3 vs. S2-3 | 248965_at | AT5G45370 | nodulin MtN21-like transporter family protein                                                                                                                                                                                                                                                                                                                                                                                                                                                                 | 53.55   | 24.2    | 2.21 | 7.04E-05 | 7.69E-03 |
| 3420 | 5 | L2-3 vs. S2-3 | 246183_at | AT5G20940 | Glycosyl hydrolase family protein;(source:Araport11)                                                                                                                                                                                                                                                                                                                                                                                                                                                          | 46.49   | 21.07   | 2.21 | 6.27E-04 | 1.51E-02 |
| 3421 | 5 | L2-3 vs. S2-3 | 247811_at | AT5G58430 | A member of EXO70 gene family, putative exocyst subunits, conserved in land plants. Arabidopsis thaliana contains 23 putative EXO70 genes, which can be classified into eight clusters on the phylogenetic tree. Targeted by AvrPtoB to manipulate the defense molecule secretion machinery.                                                                                                                                                                                                                  | 31.8    | 14.62   | 2.18 | 8.85E-04 | 1.75E-02 |
| 3422 | 5 | L2-3 vs. S2-3 | 247986_at | AT5G56880 | hypothetical protein;(source:Araport11)                                                                                                                                                                                                                                                                                                                                                                                                                                                                       | 217.83  | 100.76  | 2.16 | 3.40E-04 | 1.16E-02 |
| 3423 | 5 | L2-3 vs. S2-3 | 244971_at | ATCG00670 | Encodes the only ClpP (caseinolytic protease) encoded within the plastid genome. Contains a highly conserved catalytic triad of Ser-type proteases (Ser-His-Asp). Part of the 350 kDa chloroplast Clp complex. The name reflects nomenclature described in Adam et. al (2001).                                                                                                                                                                                                                                | 7253.01 | 3420.12 | 2.12 | 3.28E-04 | 1.15E-02 |
| 3424 | 5 | L2-3 vs. S2-3 | 266351_at | AT2G01490 | Encodes a phytanoyl-CoA 2-hydroxylase (PAHX). The mRNA is cell-to-cell mobile.                                                                                                                                                                                                                                                                                                                                                                                                                                | 246.85  | 119.49  | 2.07 | 3.63E-04 | 1.19E-02 |
| 3425 | 5 | L2-3 vs. S2-3 | 257295_at | AT3G17420 | Serine/threonine protein kinase-like protein expressed in etiolated cotyledons and found in glyoxysomes.                                                                                                                                                                                                                                                                                                                                                                                                      | 50.65   | 24.76   | 2.05 | 5.15E-04 | 1.40E-02 |



|      |   |               |            |           |                                                                                                                                                                                                                                                                                                                                                                                                                                                                                                                                |         |         |      |          |          |
|------|---|---------------|------------|-----------|--------------------------------------------------------------------------------------------------------------------------------------------------------------------------------------------------------------------------------------------------------------------------------------------------------------------------------------------------------------------------------------------------------------------------------------------------------------------------------------------------------------------------------|---------|---------|------|----------|----------|
| 3426 | 5 | L2-3 vs. S2-3 | 248454_at  | AT5G51350 | Encodes a receptor-like kinase that represses secondary growth, the production of secondary vascular tissues.                                                                                                                                                                                                                                                                                                                                                                                                                  | 89.32   | 43.75   | 2.04 | 6.95E-05 | 7.69E-03 |
| 3427 | 5 | L2-3 vs. S2-3 | 247260_at  | AT5G64500 | Major facilitator superfamily protein;(source:Araport11)                                                                                                                                                                                                                                                                                                                                                                                                                                                                       | 268.68  | 131.86  | 2.04 | 2.25E-04 | 1.07E-02 |
| 3428 | 5 | L2-3 vs. S2-3 | 248983_at  | AT5G45130 | small GTP binding protein. The mRNA is cell-to-cell mobile. Encodes a cytosolic phosphoglucomutase (PGM). Two Arabidopsis PGM proteins (AT1G70730/PGM2 and AT1G23190/PGM3) have high sequence similarities and redundant functions. Mature plants possessing a single cPGM allele had a major reduction in cPGM activity. Whereas pgm2 and pgm3 single mutants are undistinguishable from the wild type, loss of both PGM2 and PGM3 severely impairs male and female gametophyte development. The mRNA is cell-to-cell mobile. | 2326.81 | 1145.93 | 2.03 | 2.52E-05 | 6.15E-03 |
| 3429 | 5 | L2-3 vs. S2-3 | 264903_at  | AT1G23190 | to-cell mobile.                                                                                                                                                                                                                                                                                                                                                                                                                                                                                                                | 40.57   | 20.25   | 2    | 2.12E-04 | 1.07E-02 |
| 3430 | 5 | L2-3 vs. S2-3 | 245308_at  | AT4G17486 | PPPDE putative thiol peptidase family protein;(source:Araport11)                                                                                                                                                                                                                                                                                                                                                                                                                                                               | 241.03  | 120.84  | 1.99 | 6.72E-04 | 1.58E-02 |
| 3431 | 5 | L2-3 vs. S2-3 | 256663_at  | AT3G12050 | Aha1 domain-containing protein;(source:Araport11)                                                                                                                                                                                                                                                                                                                                                                                                                                                                              | 285.81  | 146.49  | 1.95 | 2.21E-04 | 1.07E-02 |
| 3432 | 5 | L2-3 vs. S2-3 | 254081_at  | AT4G25660 | PPPDE putative thiol peptidase family protein;(source:Araport11)                                                                                                                                                                                                                                                                                                                                                                                                                                                               | 215.96  | 110.75  | 1.95 | 9.32E-04 | 1.77E-02 |
| 3433 | 5 | L2-3 vs. S2-3 | 250981_at  | AT5G03140 | Concanavalin A-like lectin protein kinase family protein;(source:Araport11)                                                                                                                                                                                                                                                                                                                                                                                                                                                    | 98.31   | 50.82   | 1.93 | 6.14E-05 | 7.20E-03 |
| 3434 | 5 | L2-3 vs. S2-3 | 263799_at  | AT2G24550 | major centromere autoantigen B-like protein;(source:Araport11)                                                                                                                                                                                                                                                                                                                                                                                                                                                                 | 30.16   | 15.61   | 1.93 | 1.90E-04 | 1.07E-02 |
| 3435 | 5 | L2-3 vs. S2-3 | 261324_at  | AT1G44770 | elongation factor;(source:Araport11)                                                                                                                                                                                                                                                                                                                                                                                                                                                                                           | 594.68  | 310.12  | 1.92 | 2.47E-04 | 1.10E-02 |
| 3436 | 5 | L2-3 vs. S2-3 | 253279_at  | AT4G34030 | MCC-B is involved in leucine degradation in mitochondria. The active protein is a dimer of MCC-A and MCC-B. MCC-A is biotinylated whereas MCC-B is not. The mRNA is cell-to-cell mobile.                                                                                                                                                                                                                                                                                                                                       | 136.84  | 71.54   | 1.91 | 8.91E-04 | 1.75E-02 |
| 3437 | 5 | L2-3 vs. S2-3 | 246832_at  | AT5G26600 | Pyridoxal phosphate (PLP)-dependent transferases superfamily protein;(source:Araport11)                                                                                                                                                                                                                                                                                                                                                                                                                                        | 403     | 214.02  | 1.88 | 3.27E-04 | 1.15E-02 |
| 3438 | 5 | L2-3 vs. S2-3 | 248842_at  | AT5G46850 | phosphatidylinositol-glycan biosynthesis class X-like protein;(source:Araport11)                                                                                                                                                                                                                                                                                                                                                                                                                                               | 226.89  | 123.61  | 1.84 | 1.60E-04 | 1.02E-02 |
| 3439 | 5 | L2-3 vs. S2-3 | 260530_at  | AT2G47320 | Cyclophilin-like peptidyl-prolyl cis-trans isomerase family protein;(source:Araport11)                                                                                                                                                                                                                                                                                                                                                                                                                                         | 381.35  | 208.33  | 1.83 | 5.52E-04 | 1.45E-02 |
| 3440 | 5 | L2-3 vs. S2-3 | 253137_at  | AT4G35500 | Protein kinase superfamily protein;(source:Araport11)                                                                                                                                                                                                                                                                                                                                                                                                                                                                          | 53.27   | 29.12   | 1.83 | 8.37E-04 | 1.74E-02 |
| 3441 | 5 | L2-3 vs. S2-3 | 261085_at  | AT1G17480 | Transient expression of Pro35S:GFP-IQD7 in leaves of N. benthamiana alters microtubule organization, in patterns similar to Pro35S:GFP-IQD8 and Pro35S:GFP-IQD6.Member of IQ67 (CaM binding) domain containing family.                                                                                                                                                                                                                                                                                                         | 50.38   | 27.98   | 1.8  | 6.26E-04 | 1.51E-02 |
| 3442 | 5 | L2-3 vs. S2-3 | 256380_at  | AT1G66680 | unknown function                                                                                                                                                                                                                                                                                                                                                                                                                                                                                                               | 93.99   | 52.58   | 1.79 | 9.10E-04 | 1.77E-02 |
| 3443 | 5 | L2-3 vs. S2-3 | 265858_at  | AT2G01720 | Ribophorin I;(source:Araport11)                                                                                                                                                                                                                                                                                                                                                                                                                                                                                                | 243.85  | 136.94  | 1.78 | 1.50E-05 | 5.44E-03 |
| 3444 | 5 | L2-3 vs. S2-3 | 247380_at  | AT5G63380 | Encodes a peroxisomal protein involved in the activation of fatty acids through esterification with CoA. At5g63380 preferentially activates fatty acids with increased chain length (C9:0 to C8:0) and thus shares characteristics with long-chain fatty acyl-CoA synthases. Also able to catalyze the conversion of OPDA to its CoA ester and is therefore thought to be involved in the peroxisomal &#946;-oxidation steps of jasmonic acid biosynthesis.                                                                    | 158.65  | 88.89   | 1.78 | 8.42E-04 | 1.75E-02 |
| 3445 | 5 | L2-3 vs. S2-3 | 253871_at  | AT4G27440 | light-dependent NADPH:protochlorophyllide oxidoreductase B The mRNA is cell-to-cell mobile.                                                                                                                                                                                                                                                                                                                                                                                                                                    | 846.24  | 489.56  | 1.73 | 4.26E-04 | 1.30E-02 |
| 3446 | 5 | L2-3 vs. S2-3 | 255841_at  | AT2G33260 | Tryptophan/tyrosine permease;(source:Araport11)                                                                                                                                                                                                                                                                                                                                                                                                                                                                                | 64.25   | 37.56   | 1.71 | 2.76E-04 | 1.13E-02 |
| 3447 | 5 | L2-3 vs. S2-3 | 254359_at  | AT4G22360 | SWIB complex BAF60b domain-containing protein;(source:Araport11)                                                                                                                                                                                                                                                                                                                                                                                                                                                               | 112.04  | 65.86   | 1.7  | 1.95E-04 | 1.07E-02 |
| 3448 | 5 | L2-3 vs. S2-3 | 255303_at  | AT4G04860 | DERLIN-2.2;(source:Araport11)                                                                                                                                                                                                                                                                                                                                                                                                                                                                                                  | 219.48  | 130.91  | 1.68 | 2.89E-04 | 1.13E-02 |
| 3449 | 5 | L2-3 vs. S2-3 | 258332_at  | AT3G16180 | Encodes a low affinity nitrate transporter that is expressed in the plasma membrane and found in the phloem of the major veins of leaves. It is responsible for nitrate redistribution to young leaves.                                                                                                                                                                                                                                                                                                                        | 25.54   | 15.26   | 1.67 | 5.91E-05 | 7.20E-03 |
| 3450 | 5 | L2-3 vs. S2-3 | 262571_at  | AT1G15430 | hypothetical protein (DUF1644);(source:Araport11)                                                                                                                                                                                                                                                                                                                                                                                                                                                                              | 39.17   | 23.45   | 1.67 | 4.91E-04 | 1.37E-02 |
| 3451 | 5 | L2-3 vs. S2-3 | 258502_at  | AT3G02490 | Pentatricopeptide repeat (PPR) superfamily protein;(source:Araport11)                                                                                                                                                                                                                                                                                                                                                                                                                                                          | 35.05   | 21.07   | 1.66 | 3.32E-04 | 1.15E-02 |
| 3452 | 5 | L2-3 vs. S2-3 | 247859_at  | AT5G58410 | HEAT/U-box domain-containing protein;(source:Araport11)                                                                                                                                                                                                                                                                                                                                                                                                                                                                        | 65.41   | 39.45   | 1.66 | 9.37E-04 | 1.77E-02 |
| 3453 | 5 | L2-3 vs. S2-3 | 250130_at  | AT5G16510 | RGP5 is a member of the reversably-glycosylated family of proteins. Analyses using tagged RGP5 suggest that it is present in the cytosol and in association with the Golgi apparatus. Recombinant RGP5 does not have UDP-arabinose mutase activity based on an in vitro assay even though the related RGP1, RGP2, and RGP3 proteins do have activity in the same assay. RGP5 can form complexes with RGP1 and RGP2.                                                                                                            | 179.46  | 109.73  | 1.64 | 2.83E-04 | 1.13E-02 |
| 3454 | 5 | L2-3 vs. S2-3 | 248726_at  | AT5G47960 | Encodes a small molecular weight g-protein.                                                                                                                                                                                                                                                                                                                                                                                                                                                                                    | 27.59   | 17.12   | 1.61 | 5.14E-04 | 1.40E-02 |
| 3455 | 5 | L2-3 vs. S2-3 | 245159_at  | AT2G33100 | encodes a gene similar to cellulose synthase                                                                                                                                                                                                                                                                                                                                                                                                                                                                                   | 19.07   | 11.95   | 1.6  | 4.86E-04 | 1.37E-02 |
| 3456 | 5 | L2-3 vs. S2-3 | 266826_at  | AT2G22910 | N-acetyl-L-glutamate synthase 1;(source:Araport11)                                                                                                                                                                                                                                                                                                                                                                                                                                                                             | 24.82   | 15.58   | 1.59 | 8.50E-04 | 1.75E-02 |
| 3457 | 5 | L2-3 vs. S2-3 | 254197_at  | AT4G24040 | Encodes a trehalase, member of Glycoside Hydrolase Family 37.                                                                                                                                                                                                                                                                                                                                                                                                                                                                  | 36.93   | 23.78   | 1.55 | 3.37E-04 | 1.16E-02 |
| 3458 | 5 | L2-3 vs. S2-3 | 257004_s_a | AT3G14130 | Aldolase-type TIM barrel family protein;(source:Araport11)                                                                                                                                                                                                                                                                                                                                                                                                                                                                     | 96.72   | 65.87   | 1.47 | 7.38E-04 | 1.67E-02 |

|      |   |               |            |           |                                                                                                                                                                                                                                                                                                                                                                                                                                                                                                    |        |        |      |          |          |
|------|---|---------------|------------|-----------|----------------------------------------------------------------------------------------------------------------------------------------------------------------------------------------------------------------------------------------------------------------------------------------------------------------------------------------------------------------------------------------------------------------------------------------------------------------------------------------------------|--------|--------|------|----------|----------|
| 3459 | 5 | L2-3 vs. S2-3 | 258545_at  | AT3G07050 | Arabidopsis NSN1 encodes a nucleolar GTP- binding protein and is required for maintenance of inflorescence meristem identity and floral organ development.                                                                                                                                                                                                                                                                                                                                         | 111.06 | 146.41 | 0.76 | 9.83E-04 | 1.79E-02 |
| 3460 | 5 | L2-3 vs. S2-3 | 249910_at  | AT5G22630 | Encodes a plastid-localized arogenate dehydratase involved in phenylalanine biosynthesis. Not less than six genes encoding ADT were identified in the Arabidopsis genome: ADT1 [At1g11790]; ADT2 [At3g07630]; ADT3 [At2g27820]; ADT4 [At3g44720]; ADT5 [At5g22630]; and ADT6 [At1g08250]. The mRNA is cell-to-cell mobile.                                                                                                                                                                         | 20.45  | 27.6   | 0.74 | 1.94E-04 | 1.07E-02 |
| 3461 | 5 | L2-3 vs. S2-3 | 258035_at  | AT3G21180 | one of the type IIB calcium pump isoforms. encodes an autoinhibited Ca(2+)-ATPase that contains an N-terminal calmodulin binding autoinhibitory domain.                                                                                                                                                                                                                                                                                                                                            | 15.41  | 21.3   | 0.72 | 7.86E-04 | 1.70E-02 |
| 3462 | 5 | L2-3 vs. S2-3 | 253790_at  | AT4G28660 | Similar to PsbW subunit of photosystem II.                                                                                                                                                                                                                                                                                                                                                                                                                                                         | 39.23  | 58.82  | 0.67 | 6.26E-04 | 1.51E-02 |
| 3463 | 5 | L2-3 vs. S2-3 | 246936_at  | AT5G25360 | hypothetical protein;(source:Araport11)                                                                                                                                                                                                                                                                                                                                                                                                                                                            | 62.63  | 95.55  | 0.66 | 1.55E-04 | 1.02E-02 |
| 3464 | 5 | L2-3 vs. S2-3 | 250694_at  | AT5G06710 | Homeobox-leucine zipper protein.                                                                                                                                                                                                                                                                                                                                                                                                                                                                   | 13     | 20.21  | 0.64 | 1.57E-05 | 5.44E-03 |
| 3465 | 5 | L2-3 vs. S2-3 | 251935_at  | AT3G54090 | Encodes a fructokinase-like protein (AT3G54090/FLN1, AT1G69200/FLN2), a member of the pfkB-carbohydrate kinase family. FLN1 and FLN2 are potential plastidial thioredoxin z (TRX z) targets. Mutants display mutant chloroplast development, general plant growth and development defects and defects in PEP-dependent transcription.                                                                                                                                                              | 181.83 | 285.16 | 0.64 | 2.92E-05 | 6.15E-03 |
| 3466 | 5 | L2-3 vs. S2-3 | 265691_at  | AT2G24330 | Encodes one of two LUNAPARK proteins in Arabidopsis. Both LNPA and LNPB are predominantly distributed throughout the ER, but not preferentially localized at the three-way junctions. Mutation of both LNPA and LNPB together caused the cortical ER to develop poor ER cisternae and a less dense tubular network.                                                                                                                                                                                | 29.07  | 45.39  | 0.64 | 4.74E-05 | 7.12E-03 |
| 3467 | 5 | L2-3 vs. S2-3 | 256057_at  | AT1G07180 | Internal NAD(P)H dehydrogenase in mitochondria. The predicted protein sequence has high homology with other designated NAD(P)H DHs from microorganisms; the capacity for matrix NAD(P)H oxidation via the rotenone-insensitive pathway is significantly reduced in the Atndi1 mutant plant line; the in vitro translation product of AtNDI1 is imported into isolated mitochondria and located on the inside of the inner membrane.                                                                | 13.41  | 21.01  | 0.64 | 5.48E-04 | 1.45E-02 |
| 3468 | 5 | L2-3 vs. S2-3 | 253808_at  | AT4G28300 | Encodes a protein with 13.6% proline amino acids that is predicted to localize to the cell wall. The mRNA is cell-to-cell mobile.                                                                                                                                                                                                                                                                                                                                                                  | 22.11  | 34.67  | 0.64 | 7.40E-04 | 1.67E-02 |
| 3469 | 5 | L2-3 vs. S2-3 | 248817_at  | AT5G47020 | MraZ;(source:Araport11)                                                                                                                                                                                                                                                                                                                                                                                                                                                                            | 37.95  | 60.01  | 0.63 | 5.63E-04 | 1.45E-02 |
| 3470 | 5 | L2-3 vs. S2-3 | 254855_s_a | AT4G12140 | RING/U-box superfamily protein;(source:Araport11)                                                                                                                                                                                                                                                                                                                                                                                                                                                  | 8.94   | 14.75  | 0.61 | 3.48E-04 | 1.18E-02 |
| 3471 | 5 | L2-3 vs. S2-3 | 249815_at  | AT5G23900 | Ribosomal protein L13e family protein;(source:Araport11)                                                                                                                                                                                                                                                                                                                                                                                                                                           | 61.74  | 100.96 | 0.61 | 4.48E-04 | 1.30E-02 |
| 3472 | 5 | L2-3 vs. S2-3 | 264028_at  | AT2G03680 | The SPR1 gene encodes a plant-specific 12-kD protein which has a repeated motif at both ends, separated by a predicted rod-like domain, suggesting that it may act as an intermolecular linker. Ubiquitously expressed and belongs to a six-member gene family in Arabidopsis; expressed in transgenic seedlings localized to microtubules within the cortical array, preprophase band, phragmoplast, and mitotic spindle.                                                                         | 60.15  | 100.91 | 0.6  | 3.89E-05 | 6.43E-03 |
| 3473 | 5 | L2-3 vs. S2-3 | 250836_at  | AT5G04560 | Encodes a DNA glycosylase DEMETER (DME). Responsible for endosperm maternal-allele-specific hypomethylation at the MEDEA (MEA) gene. DME can excise 5-methylcytosine in vitro and when expressed in E. coli. DME establishes MEA imprinting by removing 5-methylcytosine to activate the maternal allele.                                                                                                                                                                                          | 17.69  | 29.72  | 0.6  | 7.58E-04 | 1.68E-02 |
| 3474 | 5 | L2-3 vs. S2-3 | 253900_at  | AT4G27130 | Translation initiation factor SUI1 family protein;(source:Araport11)                                                                                                                                                                                                                                                                                                                                                                                                                               | 368.73 | 625.26 | 0.59 | 8.90E-05 | 8.40E-03 |
| 3475 | 5 | L2-3 vs. S2-3 | 266698_at  | AT2G19830 | SNF7 family protein;(source:Araport11)                                                                                                                                                                                                                                                                                                                                                                                                                                                             | 47.62  | 80.69  | 0.59 | 4.44E-04 | 1.30E-02 |
| 3476 | 5 | L2-3 vs. S2-3 | 261013_at  | AT1G26440 | Encodes a ureide permease, uptake assays in yeast mutants indicated the longer splice variant is a cellular importer for allantoin, uracil and xanthine. Encodes 2 splice variants, UPS5L and UPS5S, which under nonstress conditions may function in allantoin degradation for nutrient recycling, whereas under stress, both genes may be involved in vesicular export allowing allantoin translocation from roots to shoots. Expression of this variant is enhanced in roots under salt stress. | 14.25  | 23.97  | 0.59 | 6.95E-04 | 1.61E-02 |
| 3477 | 5 | L2-3 vs. S2-3 | 264490_at  | AT1G27390 | The central loop of the protein faces the cytosol (ReTA).                                                                                                                                                                                                                                                                                                                                                                                                                                          | 33.87  | 57.42  | 0.59 | 7.79E-04 | 1.70E-02 |
| 3478 | 5 | L2-3 vs. S2-3 | 260151_at  | AT1G52910 | Form of TOM20, which is a component of the TOM complex, involved in transport of nuclear-encoded mitochondrial proteins                                                                                                                                                                                                                                                                                                                                                                            | 89.13  | 151.82 | 0.59 | 9.51E-04 | 1.77E-02 |
| 3479 | 5 | L2-3 vs. S2-3 | 254800_at  | AT4G13070 | fiber (DUF1218);(source:Araport11)                                                                                                                                                                                                                                                                                                                                                                                                                                                                 | 12.2   | 21.2   | 0.58 | 2.06E-04 | 1.07E-02 |
| 3480 | 5 | L2-3 vs. S2-3 | 260718_at  | AT1G48110 | RNA-binding CRS1 / YhbY (CRM) domain protein;(source:Araport11)                                                                                                                                                                                                                                                                                                                                                                                                                                    | 109.13 | 186.66 | 0.58 | 2.85E-04 | 1.13E-02 |
| 3481 | 5 | L2-3 vs. S2-3 | 264099_at  | AT1G79050 | evolutionarily conserved C-terminal region 7;(source:Araport11)                                                                                                                                                                                                                                                                                                                                                                                                                                    | 38.84  | 66.71  | 0.58 | 3.14E-04 | 1.15E-02 |
|      |   |               |            |           | recA DNA recombination family protein;(source:Araport11)                                                                                                                                                                                                                                                                                                                                                                                                                                           |        |        |      |          |          |

|      |   |               |            |           |                                                                                                                                                                                                                                                                                                                                                                                                                                                                                                                                                                                                                                                                                                                                                                                                                                                                                                                                                                                                                                                                                                            |        |         |      |          |          |
|------|---|---------------|------------|-----------|------------------------------------------------------------------------------------------------------------------------------------------------------------------------------------------------------------------------------------------------------------------------------------------------------------------------------------------------------------------------------------------------------------------------------------------------------------------------------------------------------------------------------------------------------------------------------------------------------------------------------------------------------------------------------------------------------------------------------------------------------------------------------------------------------------------------------------------------------------------------------------------------------------------------------------------------------------------------------------------------------------------------------------------------------------------------------------------------------------|--------|---------|------|----------|----------|
| 3482 | 5 | L2-3 vs. S2-3 | 252683_at  | AT3G44380 | Late embryogenesis abundant (LEA) hydroxyproline-rich glycoprotein family;(source:Araport11)                                                                                                                                                                                                                                                                                                                                                                                                                                                                                                                                                                                                                                                                                                                                                                                                                                                                                                                                                                                                               | 16.97  | 29.36   | 0.58 | 8.03E-04 | 1.73E-02 |
| 3483 | 5 | L2-3 vs. S2-3 | 256980_at  | AT3G26932 | dsRNA-binding protein 3;(source:Araport11)                                                                                                                                                                                                                                                                                                                                                                                                                                                                                                                                                                                                                                                                                                                                                                                                                                                                                                                                                                                                                                                                 | 11.22  | 19.66   | 0.57 | 1.01E-04 | 8.94E-03 |
| 3484 | 5 | L2-3 vs. S2-3 | 246730_at  | AT5G28060 | Ribosomal protein S24e family protein;(source:Araport11)                                                                                                                                                                                                                                                                                                                                                                                                                                                                                                                                                                                                                                                                                                                                                                                                                                                                                                                                                                                                                                                   | 34.78  | 61.31   | 0.57 | 2.18E-04 | 1.07E-02 |
| 3485 | 5 | L2-3 vs. S2-3 | 245524_at  | AT4G15920 | Encodes a vacuolar fructose transporter expressed in parenchyma and xylem that controls leaf fructose content. When its expression is reduced, fructose accumulates in leaves.                                                                                                                                                                                                                                                                                                                                                                                                                                                                                                                                                                                                                                                                                                                                                                                                                                                                                                                             | 9.98   | 17.6    | 0.57 | 5.45E-04 | 1.45E-02 |
| 3486 | 5 | L2-3 vs. S2-3 | 247721_at  | AT5G59140 | BTB/POZ domain-containing protein;(source:Araport11)                                                                                                                                                                                                                                                                                                                                                                                                                                                                                                                                                                                                                                                                                                                                                                                                                                                                                                                                                                                                                                                       | 43.78  | 76.68   | 0.57 | 5.58E-04 | 1.45E-02 |
| 3487 | 5 | L2-3 vs. S2-3 | 263847_at  | AT2G36970 | UDP-Glycosyltransferase superfamily protein;(source:Araport11)                                                                                                                                                                                                                                                                                                                                                                                                                                                                                                                                                                                                                                                                                                                                                                                                                                                                                                                                                                                                                                             | 20.51  | 36.29   | 0.57 | 6.86E-04 | 1.60E-02 |
| 3488 | 5 | L2-3 vs. S2-3 | 252669_at  | AT3G44100 | MD-2-related lipid recognition domain-containing protein;(source:Araport11)                                                                                                                                                                                                                                                                                                                                                                                                                                                                                                                                                                                                                                                                                                                                                                                                                                                                                                                                                                                                                                | 102.03 | 177.55  | 0.57 | 8.63E-04 | 1.75E-02 |
| 3489 | 5 | L2-3 vs. S2-3 | 254355_at  | AT4G22380 | Ribosomal protein L7Ae/L30e/S12e/Gadd45 family protein;(source:Araport11)                                                                                                                                                                                                                                                                                                                                                                                                                                                                                                                                                                                                                                                                                                                                                                                                                                                                                                                                                                                                                                  | 117.52 | 204.5   | 0.57 | 9.79E-04 | 1.79E-02 |
| 3490 | 5 | L2-3 vs. S2-3 | 251695_at  | AT3G56590 | hydroxyproline-rich glycoprotein family protein;(source:Araport11)                                                                                                                                                                                                                                                                                                                                                                                                                                                                                                                                                                                                                                                                                                                                                                                                                                                                                                                                                                                                                                         | 13.05  | 23.74   | 0.55 | 8.38E-05 | 8.33E-03 |
| 3491 | 5 | L2-3 vs. S2-3 | 255285_at  | AT4G04630 | senescence regulator (Protein of unknown function, DUF584);(source:Araport11)                                                                                                                                                                                                                                                                                                                                                                                                                                                                                                                                                                                                                                                                                                                                                                                                                                                                                                                                                                                                                              | 13     | 23.64   | 0.55 | 2.42E-04 | 1.09E-02 |
| 3492 | 5 | L2-3 vs. S2-3 | 260865_at  | AT1G43760 | DNAse I-like superfamily protein;(source:Araport11)                                                                                                                                                                                                                                                                                                                                                                                                                                                                                                                                                                                                                                                                                                                                                                                                                                                                                                                                                                                                                                                        | 13.06  | 23.92   | 0.55 | 2.86E-04 | 1.13E-02 |
| 3493 | 5 | L2-3 vs. S2-3 | 259735_at  | AT1G64405 | hypothetical protein;(source:Araport11)<br>Similar to SKP1 in yeast and humans which are involved in mitotic cell cycle control and ubiquitin mediated proteolysis.                                                                                                                                                                                                                                                                                                                                                                                                                                                                                                                                                                                                                                                                                                                                                                                                                                                                                                                                        | 15.42  | 28.34   | 0.54 | 1.59E-04 | 1.02E-02 |
| 3494 | 5 | L2-3 vs. S2-3 | 249228_at  | AT5G42190 | Zinc-binding ribosomal protein family protein;(source:Araport11)                                                                                                                                                                                                                                                                                                                                                                                                                                                                                                                                                                                                                                                                                                                                                                                                                                                                                                                                                                                                                                           | 25.5   | 46.87   | 0.54 | 1.73E-04 | 1.02E-02 |
| 3495 | 5 | L2-3 vs. S2-3 | 259612_at  | AT1G52300 | Fatty acid desaturase family protein;(source:Araport11)                                                                                                                                                                                                                                                                                                                                                                                                                                                                                                                                                                                                                                                                                                                                                                                                                                                                                                                                                                                                                                                    | 1178.8 | 2196.12 | 0.54 | 2.57E-04 | 1.11E-02 |
| 3496 | 5 | L2-3 vs. S2-3 | 259391_s_a | AT1G06350 | RING/FYVE/PHD zinc finger superfamily protein;(source:Araport11)                                                                                                                                                                                                                                                                                                                                                                                                                                                                                                                                                                                                                                                                                                                                                                                                                                                                                                                                                                                                                                           | 249.25 | 464.14  | 0.54 | 6.99E-04 | 1.62E-02 |
| 3497 | 5 | L2-3 vs. S2-3 | 261481_at  | AT1G14260 | Ribosomal protein PSRP-3/Ycf65;(source:Araport11)                                                                                                                                                                                                                                                                                                                                                                                                                                                                                                                                                                                                                                                                                                                                                                                                                                                                                                                                                                                                                                                          | 13.39  | 25.06   | 0.53 | 3.09E-04 | 1.14E-02 |
| 3498 | 5 | L2-3 vs. S2-3 | 246517_at  | AT5G15760 | sequence-specific DNA binding transcription factor;(source:Araport11)                                                                                                                                                                                                                                                                                                                                                                                                                                                                                                                                                                                                                                                                                                                                                                                                                                                                                                                                                                                                                                      | 13.46  | 25.17   | 0.53 | 5.20E-04 | 1.41E-02 |
| 3499 | 5 | L2-3 vs. S2-3 | 257894_at  | AT3G17100 | calmodulin-like 41;(source:Araport11)                                                                                                                                                                                                                                                                                                                                                                                                                                                                                                                                                                                                                                                                                                                                                                                                                                                                                                                                                                                                                                                                      | 17.27  | 32.48   | 0.53 | 7.41E-04 | 1.67E-02 |
| 3500 | 5 | L2-3 vs. S2-3 | 252136_at  | AT3G50770 | hypothetical protein;(source:Araport11)                                                                                                                                                                                                                                                                                                                                                                                                                                                                                                                                                                                                                                                                                                                                                                                                                                                                                                                                                                                                                                                                    | 12.51  | 23.47   | 0.53 | 9.75E-04 | 1.79E-02 |
| 3501 | 5 | L2-3 vs. S2-3 | 248139_at  | AT5G54970 | Polynucleotidyl transferase, ribonuclease H-like superfamily protein;(source:Araport11)                                                                                                                                                                                                                                                                                                                                                                                                                                                                                                                                                                                                                                                                                                                                                                                                                                                                                                                                                                                                                    | 14.91  | 28.64   | 0.52 | 3.05E-04 | 1.14E-02 |
| 3502 | 5 | L2-3 vs. S2-3 | 266306_at  | AT2G26970 | Ribosomal protein S3Ae;(source:Araport11)                                                                                                                                                                                                                                                                                                                                                                                                                                                                                                                                                                                                                                                                                                                                                                                                                                                                                                                                                                                                                                                                  | 30.15  | 58.81   | 0.51 | 6.17E-05 | 7.20E-03 |
| 3503 | 5 | L2-3 vs. S2-3 | 259096_at  | AT3G04840 | Cytochrome b-c1 complex, subunit 8 protein;(source:Araport11)                                                                                                                                                                                                                                                                                                                                                                                                                                                                                                                                                                                                                                                                                                                                                                                                                                                                                                                                                                                                                                              | 241.35 | 473.09  | 0.51 | 2.36E-04 | 1.09E-02 |
| 3504 | 5 | L2-3 vs. S2-3 | 258772_at  | AT3G10860 | Encodes a LysM-containing receptor-like kinase. Induction of chitin-responsive genes by chitin treatment is not blocked in the mutant. Based on protein sequence alignment analysis, it has a typical RD signaling domain in its catalytic loop and possesses autophosphorylation activity.It is required for the suppression of defense responses in absence of pathogen infection or upon abscisic acid treatment. Loss-of-function mutants display enhanced resistance to Botrytis cinerea and Pectobacterium carotovorum. Its expression is repressed by pathogen infection and biological elicitors and is induced abscisic acid.Expression is strongly repressed by elicitors and fungal infection, and is induced by the hormone abscisic acid (ABA). Insertional mutants show increased expression of PHYTOALEXIN-DEFICIENT 3 (PAD3), enhanced resistance to Botrytis cinerea and Pectobacterium carotovorum infection and reduced physiological responses to ABA, suggesting that LYK3 is important for the cross-talk between signaling pathways activated by ABA and pathogens (PMID:24639336). | 569.28 | 1108.84 | 0.51 | 3.00E-04 | 1.13E-02 |
| 3505 | 5 | L2-3 vs. S2-3 | 246371_at  | AT1G51940 | RING/U-box superfamily protein;(source:Araport11)                                                                                                                                                                                                                                                                                                                                                                                                                                                                                                                                                                                                                                                                                                                                                                                                                                                                                                                                                                                                                                                          | 63.37  | 127.93  | 0.5  | 1.21E-04 | 9.20E-03 |
| 3506 | 5 | L2-3 vs. S2-3 | 255899_at  | AT1G17970 | Encodes a TatB--like component of the mitochondrial Twin arginine translocation (Tat) pathway. The protein is localized to the inner mitochondrial membrane that is nuclear-encoded and is essential for plant growth and development. Mutants are embryo lethal.                                                                                                                                                                                                                                                                                                                                                                                                                                                                                                                                                                                                                                                                                                                                                                                                                                          | 19.97  | 39.7    | 0.5  | 1.49E-04 | 1.02E-02 |
| 3507 | 5 | L2-3 vs. S2-3 | 249107_at  | AT5G43680 | encodes a protein similar to adenylate kinase.                                                                                                                                                                                                                                                                                                                                                                                                                                                                                                                                                                                                                                                                                                                                                                                                                                                                                                                                                                                                                                                             | 12.12  | 24.23   | 0.5  | 3.61E-04 | 1.19E-02 |
| 3508 | 5 | L2-3 vs. S2-3 | 247382_at  | AT5G63400 | mitochondrial ribosomal protein L11;(source:Araport11)                                                                                                                                                                                                                                                                                                                                                                                                                                                                                                                                                                                                                                                                                                                                                                                                                                                                                                                                                                                                                                                     | 99.96  | 200.26  | 0.5  | 5.13E-04 | 1.40E-02 |
| 3509 | 5 | L2-3 vs. S2-3 | 253138_at  | AT4G35490 | Putative homolog of mammalian BLOC-1 Subunit 2. Protein - protein interaction with BLOS1.                                                                                                                                                                                                                                                                                                                                                                                                                                                                                                                                                                                                                                                                                                                                                                                                                                                                                                                                                                                                                  | 185.5  | 370.83  | 0.5  | 6.11E-04 | 1.51E-02 |
| 3510 | 5 | L2-3 vs. S2-3 | 248587_at  | AT5G49550 | Cysteine proteinases superfamily protein;(source:Araport11)                                                                                                                                                                                                                                                                                                                                                                                                                                                                                                                                                                                                                                                                                                                                                                                                                                                                                                                                                                                                                                                | 21.09  | 42.52   | 0.5  | 7.23E-04 | 1.65E-02 |
| 3511 | 5 | L2-3 vs. S2-3 | 258855_at  | AT3G02070 | NAD(P)H-quinone oxidoreductase subunit, putative (DUF581);(source:Araport11)                                                                                                                                                                                                                                                                                                                                                                                                                                                                                                                                                                                                                                                                                                                                                                                                                                                                                                                                                                                                                               | 46.69  | 96.04   | 0.49 | 1.35E-05 | 5.44E-03 |
| 3512 | 5 | L2-3 vs. S2-3 | 256927_at  | AT3G22550 | member of BETA-EXPANSINS. Naming convention from the Expansin Working Group (Kende et al, 2004. Plant Mol Bio)                                                                                                                                                                                                                                                                                                                                                                                                                                                                                                                                                                                                                                                                                                                                                                                                                                                                                                                                                                                             | 121.83 | 246.84  | 0.49 | 1.74E-04 | 1.02E-02 |
| 3513 | 5 | L2-3 vs. S2-3 | 265443_at  | AT2G20750 | fiber;(source:Araport11)                                                                                                                                                                                                                                                                                                                                                                                                                                                                                                                                                                                                                                                                                                                                                                                                                                                                                                                                                                                                                                                                                   | 23.71  | 48.78   | 0.49 | 3.24E-04 | 1.15E-02 |
| 3514 | 5 | L2-3 vs. S2-3 | 265459_at  | AT2G46540 | cysteine-rich TM module stress tolerance protein;(source:Araport11)                                                                                                                                                                                                                                                                                                                                                                                                                                                                                                                                                                                                                                                                                                                                                                                                                                                                                                                                                                                                                                        | 191.62 | 401.53  | 0.48 | 6.38E-04 | 1.52E-02 |
| 3515 | 5 | L2-3 vs. S2-3 | 250881_at  | AT5G04080 |                                                                                                                                                                                                                                                                                                                                                                                                                                                                                                                                                                                                                                                                                                                                                                                                                                                                                                                                                                                                                                                                                                            | 9.52   | 20.08   | 0.47 | 1.75E-04 | 1.02E-02 |

|      |   |               |            |           |                                                                                                                                                                                                                                                                                                                                                                                                                                                  |        |         |      |          |          |
|------|---|---------------|------------|-----------|--------------------------------------------------------------------------------------------------------------------------------------------------------------------------------------------------------------------------------------------------------------------------------------------------------------------------------------------------------------------------------------------------------------------------------------------------|--------|---------|------|----------|----------|
| 3516 | 5 | L2-3 vs. S2-3 | 247049_at  | AT5G66440 | tRNA-methyltransferase non-catalytic subunit trm6MTase subunit;(source:Araport11)                                                                                                                                                                                                                                                                                                                                                                | 12.2   | 26.11   | 0.47 | 2.66E-04 | 1.12E-02 |
| 3517 | 5 | L2-3 vs. S2-3 | 267349_at  | AT2G40010 | Ribosomal protein L10 family protein;(source:Araport11)                                                                                                                                                                                                                                                                                                                                                                                          | 21.82  | 46.41   | 0.47 | 7.09E-04 | 1.63E-02 |
|      |   |               |            |           | NdhV is loosely associated with the NDH complex and is required for stabilizing NDH subcomplexes A and E.                                                                                                                                                                                                                                                                                                                                        |        |         |      |          |          |
| 3518 | 5 | L2-3 vs. S2-3 | 263410_at  | AT2G04039 |                                                                                                                                                                                                                                                                                                                                                                                                                                                  | 13.13  | 28.06   | 0.47 | 8.75E-04 | 1.75E-02 |
| 3519 | 5 | L2-3 vs. S2-3 | 249750_at  | AT5G24570 | hypothetical protein;(source:Araport11)                                                                                                                                                                                                                                                                                                                                                                                                          | 13.92  | 30.54   | 0.46 | 4.07E-04 | 1.26E-02 |
|      |   |               |            |           | Encodes a transcription factor AtTCP14 that regulates seed germination. AtTCP14 shows elevated expression level just prior to germination. AtTCP14 is predominantly expressed in the vascular tissue of the embryo, and affects gene expression in radicles in a non-cell-autonomous manner. Modulates GA-dependent stamen filament elongation by direct activation of SAUR63 subfamily genes through conserved target sites in their promoters. |        |         |      |          |          |
| 3520 | 5 | L2-3 vs. S2-3 | 252425_at  | AT3G47620 |                                                                                                                                                                                                                                                                                                                                                                                                                                                  | 21.67  | 47      | 0.46 | 6.11E-04 | 1.51E-02 |
| 3521 | 5 | L2-3 vs. S2-3 | 261354_at  | AT1G79690 | nudix hydrolase homolog 3;(source:Araport11)                                                                                                                                                                                                                                                                                                                                                                                                     | 46.95  | 102.3   | 0.46 | 9.36E-04 | 1.77E-02 |
| 3522 | 5 | L2-3 vs. S2-3 | 246379_s_a | AT1G57860 | Translation protein SH3-like family protein;(source:Araport11)                                                                                                                                                                                                                                                                                                                                                                                   | 270.76 | 600.68  | 0.45 | 1.22E-04 | 9.20E-03 |
| 3523 | 5 | L2-3 vs. S2-3 | 253097_at  | AT4G37320 | member of CYP81D                                                                                                                                                                                                                                                                                                                                                                                                                                 | 19.1   | 42.34   | 0.45 | 3.17E-04 | 1.15E-02 |
| 3524 | 5 | L2-3 vs. S2-3 | 253891_at  | AT4G27720 | Major facilitator superfamily protein;(source:Araport11)                                                                                                                                                                                                                                                                                                                                                                                         | 156.03 | 350.35  | 0.45 | 3.76E-04 | 1.20E-02 |
|      |   |               |            |           | Encodes a 5-inositol-polyphosphate phosphatase, that, in vitro, shows some activity against Ins(1,4,5)P3 and PI(3,4,5)P3, but even higher activity against PI(4,5)P2                                                                                                                                                                                                                                                                             |        |         |      |          |          |
| 3525 | 5 | L2-3 vs. S2-3 | 263489_at  | AT2G31830 | Encodes a protein localized to phloem filaments that is required for phloem filament formation.The mRNA is cell-to-cell mobile.                                                                                                                                                                                                                                                                                                                  | 18.47  | 41.42   | 0.45 | 4.47E-04 | 1.30E-02 |
| 3526 | 5 | L2-3 vs. S2-3 | 259166_at  | AT3G01670 | Member of IQ67 (CaM binding) domain containing family.                                                                                                                                                                                                                                                                                                                                                                                           | 15.98  | 36.3    | 0.44 | 3.86E-04 | 1.21E-02 |
| 3527 | 5 | L2-3 vs. S2-3 | 250233_at  | AT5G13460 | Rubisco activase, a nuclear-encoded chloroplast protein that consists of two isoforms arising from alternative splicing in most plants. Required for the light activation of rubisco. Involved in jasmonate-induced leaf senescence.                                                                                                                                                                                                             | 31.02  | 70.97   | 0.44 | 4.90E-04 | 1.37E-02 |
|      |   |               |            |           |                                                                                                                                                                                                                                                                                                                                                                                                                                                  |        |         |      |          |          |
| 3528 | 5 | L2-3 vs. S2-3 | 245061_at  | AT2G39730 |                                                                                                                                                                                                                                                                                                                                                                                                                                                  | 56.37  | 127.75  | 0.44 | 6.49E-04 | 1.53E-02 |
| 3529 | 5 | L2-3 vs. S2-3 | 252601_s_a | AT3G45030 | Ribosomal protein S10p/S20e family protein;(source:Araport11)                                                                                                                                                                                                                                                                                                                                                                                    | 453.19 | 1037.19 | 0.44 | 7.44E-04 | 1.67E-02 |
| 3530 | 5 | L2-3 vs. S2-3 | 258858_at  | AT3G02080 | Ribosomal protein S19e family protein;(source:Araport11)                                                                                                                                                                                                                                                                                                                                                                                         | 287.43 | 658.7   | 0.44 | 7.56E-04 | 1.68E-02 |
| 3531 | 5 | L2-3 vs. S2-3 | 247328_at  | AT5G64130 | cAMP-regulated phosphoprotein 19-related protein;(source:Araport11)                                                                                                                                                                                                                                                                                                                                                                              | 434.57 | 990.95  | 0.44 | 9.06E-04 | 1.76E-02 |
| 3532 | 5 | L2-3 vs. S2-3 | 258630_at  | AT3G02820 | zinc knuckle (CCHC-type) family protein;(source:Araport11)                                                                                                                                                                                                                                                                                                                                                                                       | 13.27  | 30.04   | 0.44 | 9.85E-04 | 1.79E-02 |
|      |   |               |            |           | Encodes a Ca(2+)-dependent CaM-binding protein. AtGT2L specifically targets the nucleus and possesses both transcriptional activation and DNA-binding abilities, implicating its function as a nuclear transcription factor.                                                                                                                                                                                                                     |        |         |      |          |          |
| 3533 | 5 | L2-3 vs. S2-3 | 245861_at  | AT5G28300 |                                                                                                                                                                                                                                                                                                                                                                                                                                                  | 13.22  | 31.02   | 0.43 | 1.70E-05 | 5.44E-03 |
| 3534 | 5 | L2-3 vs. S2-3 | 261886_s_a | AT1G80700 | stress response NST1-like protein;(source:Araport11)                                                                                                                                                                                                                                                                                                                                                                                             | 110.5  | 256.65  | 0.43 | 1.44E-04 | 1.02E-02 |
|      |   |               |            |           | Encodes a bifunctional enzyme, wax ester synthase (WS) and diacylglycerol acyltransferase (DGAT). In vitro assay indicated a ratio of 10.9 between its WS and DGAT activities. Both mutant and in vivo expression/analysis in yeast studies indicated a role in wax biosynthesis.                                                                                                                                                                |        |         |      |          |          |
| 3535 | 5 | L2-3 vs. S2-3 | 249614_at  | AT5G37300 |                                                                                                                                                                                                                                                                                                                                                                                                                                                  | 12.29  | 28.61   | 0.43 | 2.57E-04 | 1.11E-02 |
| 3536 | 5 | L2-3 vs. S2-3 | 267431_at  | AT2G34870 | hydroxyproline-rich glycoprotein family protein;(source:Araport11)                                                                                                                                                                                                                                                                                                                                                                               | 14.25  | 32.76   | 0.43 | 3.80E-04 | 1.20E-02 |
| 3537 | 5 | L2-3 vs. S2-3 | 254491_at  | AT4G20300 | Serine/Threonine-kinase, putative (DUF1639);(source:Araport11)                                                                                                                                                                                                                                                                                                                                                                                   | 58.63  | 136.83  | 0.43 | 5.66E-04 | 1.46E-02 |
| 3538 | 5 | L2-3 vs. S2-3 | 257134_at  | AT3G12870 | transmembrane protein;(source:Araport11)                                                                                                                                                                                                                                                                                                                                                                                                         | 25.37  | 58.61   | 0.43 | 6.26E-04 | 1.51E-02 |
| 3539 | 5 | L2-3 vs. S2-3 | 246289_at  | AT3G56880 | VQ motif-containing protein;(source:Araport11)                                                                                                                                                                                                                                                                                                                                                                                                   | 106.6  | 246.12  | 0.43 | 7.40E-04 | 1.67E-02 |
| 3540 | 5 | L2-3 vs. S2-3 | 266481_at  | AT2G31070 | TCP family protein involved in heterochronic regulation of leaf differentiation.                                                                                                                                                                                                                                                                                                                                                                 | 28     | 66.37   | 0.42 | 5.55E-05 | 7.12E-03 |
| 3541 | 5 | L2-3 vs. S2-3 | 265730_at  | AT2G32220 | Ribosomal L27e protein family;(source:Araport11)                                                                                                                                                                                                                                                                                                                                                                                                 | 25.53  | 61.46   | 0.42 | 1.82E-04 | 1.05E-02 |
|      |   |               |            |           | The gene encodes a gamma-glutamyltransferase (AKA gamma-glutamyl transpeptidase, EC 2.3.2.2) that is located in vascular tissues (predominantly phloem) of leaves and is involved in the degradation of glutathione. The encoded enzyme also mitigates oxidative stress by metabolizing GSSG (oxidized form of GSH - glutathione) in the apoplast.                                                                                               |        |         |      |          |          |
| 3542 | 5 | L2-3 vs. S2-3 | 252906_at  | AT4G39640 |                                                                                                                                                                                                                                                                                                                                                                                                                                                  | 27.75  | 66.22   | 0.42 | 4.17E-04 | 1.29E-02 |
| 3543 | 5 | L2-3 vs. S2-3 | 253436_at  | AT4G32470 | Cytochrome bd ubiquinol oxidase, 14kDa subunit;(source:Araport11)                                                                                                                                                                                                                                                                                                                                                                                | 521.9  | 1232.67 | 0.42 | 4.20E-04 | 1.29E-02 |
| 3544 | 5 | L2-3 vs. S2-3 | 247427_at  | AT5G62580 | ARM repeat superfamily protein;(source:Araport11)                                                                                                                                                                                                                                                                                                                                                                                                | 27.24  | 65.35   | 0.42 | 8.22E-04 | 1.74E-02 |
| 3545 | 5 | L2-3 vs. S2-3 | 259371_at  | AT1G69080 | Adenine nucleotide alpha hydrolases-like superfamily protein;(source:Araport11)                                                                                                                                                                                                                                                                                                                                                                  | 16.62  | 39.38   | 0.42 | 9.03E-04 | 1.76E-02 |
|      |   |               |            |           | Part of multi-protein complex, acting as guanine nucleotide exchange factors (GEFs) and possibly as tethers, regulating intracellular trafficking.                                                                                                                                                                                                                                                                                               |        |         |      |          |          |
| 3546 | 5 | L2-3 vs. S2-3 | 265386_at  | AT2G20930 | Arabinogalactan methylesterase,involved in arabinogalactan glucuronic acid methylation. Interacts with eIF3.                                                                                                                                                                                                                                                                                                                                     | 41.87  | 100.83  | 0.42 | 9.58E-04 | 1.78E-02 |
| 3547 | 5 | L2-3 vs. S2-3 | 259588_at  | AT1G27930 |                                                                                                                                                                                                                                                                                                                                                                                                                                                  | 26.81  | 64.68   | 0.41 | 4.80E-04 | 1.36E-02 |
| 3548 | 5 | L2-3 vs. S2-3 | 260974_at  | AT1G53440 | Leucine-rich repeat transmembrane protein kinase;(source:Araport11)                                                                                                                                                                                                                                                                                                                                                                              | 11     | 27      | 0.41 | 5.63E-04 | 1.45E-02 |
| 3549 | 5 | L2-3 vs. S2-3 | 258038_at  | AT3G21260 | Glycolipid transfer protein (GLTP) family protein;(source:Araport11)                                                                                                                                                                                                                                                                                                                                                                             | 10.83  | 26.39   | 0.41 | 7.68E-04 | 1.69E-02 |
| 3550 | 5 | L2-3 vs. S2-3 | 257115_at  | AT3G20150 | Kinesin motor family protein;(source:Araport11)                                                                                                                                                                                                                                                                                                                                                                                                  | 10.18  | 24.64   | 0.41 | 9.41E-04 | 1.77E-02 |

|      |   |               |                         |           |                                                                                                                                                                                                                                                                                                                                                 |        |         |      |          |          |
|------|---|---------------|-------------------------|-----------|-------------------------------------------------------------------------------------------------------------------------------------------------------------------------------------------------------------------------------------------------------------------------------------------------------------------------------------------------|--------|---------|------|----------|----------|
| 3551 | 5 | L2-3 vs. S2-3 | 250800_at               | AT5G05370 | Cytochrome b-c1 complex, subunit 8 protein;(source:Araport11)<br>Encodes glycine decarboxylase complex H protein. Involved in photorespiration. The mRNA is cell-to-cell mobile.                                                                                                                                                                | 84.22  | 208.83  | 0.4  | 3.20E-05 | 6.15E-03 |
| 3552 | 5 | L2-3 vs. S2-3 | 266636_at               | AT2G35370 | Ycf1 protein;(source:Araport11)                                                                                                                                                                                                                                                                                                                 | 19.76  | 49.82   | 0.4  | 8.33E-05 | 8.33E-03 |
| 3553 | 5 | L2-3 vs. S2-3 | 244993_s_a              | ATCG01130 | Ribosomal L29 family protein;(source:Araport11)                                                                                                                                                                                                                                                                                                 | 942.44 | 2349.95 | 0.4  | 2.66E-04 | 1.12E-02 |
| 3554 | 5 | L2-3 vs. S2-3 | 258709_at               | AT3G09500 | TLC ATP/ADP transporter;(source:Araport11)                                                                                                                                                                                                                                                                                                      | 344.12 | 867.28  | 0.4  | 3.64E-04 | 1.19E-02 |
| 3555 | 5 | L2-3 vs. S2-3 | 250797_at               | AT5G05310 | stress response NST1-like protein;(source:Araport11)                                                                                                                                                                                                                                                                                            | 48.57  | 121.61  | 0.4  | 6.23E-04 | 1.51E-02 |
| 3556 | 5 | L2-3 vs. S2-3 | 246975_at               | AT5G24890 | Encodes a member of the R2R3-MYB transcription factor gene family. Induced by jasmonate. Involved in jasmonate response during stamen development. MYB21 interacts with JAZ proteins, and functions redundantly with MYB24 and MYB57 to regulate stamen development.                                                                            | 28.64  | 71.26   | 0.4  | 8.21E-04 | 1.74E-02 |
| 3557 | 5 | L2-3 vs. S2-3 | 258237_at               | AT3G27810 | LIGHT-DEPENDENT SHORT HYPOCOTYLS-like protein (DUF640);(source:Araport11)                                                                                                                                                                                                                                                                       | 18.11  | 46.43   | 0.39 | 2.31E-04 | 1.08E-02 |
| 3558 | 5 | L2-3 vs. S2-3 | 256062_at               | AT1G07090 | Encodes a myo-inositol oxygenase family gene.                                                                                                                                                                                                                                                                                                   | 12.9   | 33.23   | 0.39 | 2.94E-04 | 1.13E-02 |
| 3559 | 5 | L2-3 vs. S2-3 | 266693_at               | AT2G19800 | NAD(P)-binding Rossmann-fold superfamily protein;(source:Araport11)                                                                                                                                                                                                                                                                             | 38.31  | 97.47   | 0.39 | 4.48E-04 | 1.30E-02 |
| 3560 | 5 | L2-3 vs. S2-3 | 258976_at               | AT3G01980 | Otcicosaepetide/Phox/Bem1p family protein;(source:Araport11)                                                                                                                                                                                                                                                                                    | 72.21  | 184.28  | 0.39 | 5.79E-04 | 1.48E-02 |
| 3561 | 5 | L2-3 vs. S2-3 | 255221_at               | AT4G05150 | TonB-dependent heme receptor A;(source:Araport11)                                                                                                                                                                                                                                                                                               | 172.95 | 446.11  | 0.39 | 9.37E-04 | 1.77E-02 |
| 3562 | 5 | L2-3 vs. S2-3 | 256342_at               | AT1G72020 | Disease resistance-responsive (dirigent-like protein) family protein;(source:Araport11)                                                                                                                                                                                                                                                         | 227.96 | 604.56  | 0.38 | 5.30E-05 | 7.12E-03 |
| 3563 | 5 | L2-3 vs. S2-3 | 257570_at               | AT3G13662 | polyamine-modulated factor 1-binding protein;(source:Araport11)                                                                                                                                                                                                                                                                                 | 21.52  | 57.14   | 0.38 | 3.27E-04 | 1.15E-02 |
| 3564 | 5 | L2-3 vs. S2-3 | 246905_at               | AT5G25570 | PLAT1 domain stress protein family member. Involved in mediating response to stresses such as pathogen infection. It is found in endoplasmic reticulum bodies. PLAT1 is induced by pathogenic fungi and induces the production of scopolin.                                                                                                     | 10.8   | 28.53   | 0.38 | 5.40E-04 | 1.44E-02 |
| 3565 | 5 | L2-3 vs. S2-3 | 252880_at               | AT4G39730 | Encodes catalytic subunit of serine/threonine protein phosphatase 2A. It can associate with phytochromes A and B in vitro. Mutant plants display an accelerated flowering phenotype. Acts antagonistically to SnRK2 to regulate ABI5 phosphorylation. It interacts with NRP which results in tethering to endosomes leading to its degradation. | 506.34 | 1337.79 | 0.38 | 7.66E-04 | 1.69E-02 |
| 3566 | 5 | L2-3 vs. S2-3 | 256629_at               | AT3G19980 | LOW protein: M-phase inducer phosphatase-like protein;(source:Araport11)                                                                                                                                                                                                                                                                        | 72.53  | 192.82  | 0.38 | 8.24E-04 | 1.74E-02 |
| 3567 | 5 | L2-3 vs. S2-3 | 247457_at               | AT5G62170 | Non-catalytic subunit unique to Nuclear DNA-dependent RNA polymerase V; homologous to budding yeast RPB5.                                                                                                                                                                                                                                       | 12.94  | 33.87   | 0.38 | 8.82E-04 | 1.75E-02 |
| 3568 | 5 | L2-3 vs. S2-3 | 251662_at               | AT3G57080 | NPF3.1 is a membrane localized GA transporter that is expressed in the root endodermis.                                                                                                                                                                                                                                                         | 17.85  | 48.61   | 0.37 | 3.77E-05 | 6.43E-03 |
| 3569 | 5 | L2-3 vs. S2-3 | 262281_at               | AT1G68570 | Mitochondrial outer membrane translocase complex, subunit Tom7;(source:Araport11)                                                                                                                                                                                                                                                               | 14.34  | 38.69   | 0.37 | 2.09E-04 | 1.07E-02 |
| 3570 | 5 | L2-3 vs. S2-3 | 249268_at               | AT5G41685 | nucleolar-like protein;(source:Araport11)                                                                                                                                                                                                                                                                                                       | 11.41  | 30.91   | 0.37 | 5.16E-04 | 1.40E-02 |
| 3571 | 5 | L2-3 vs. S2-3 | 262112_at               | AT1G02870 | peptidyl-prolyl cis-trans isomerase G;(source:Araport11)                                                                                                                                                                                                                                                                                        | 19.17  | 52.35   | 0.37 | 6.45E-04 | 1.53E-02 |
| 3572 | 5 | L2-3 vs. S2-3 | 252676_at               | AT3G44280 | hexokinase-1 protein;(source:Araport11)                                                                                                                                                                                                                                                                                                         | 30.45  | 83.38   | 0.37 | 8.12E-04 | 1.74E-02 |
| 3573 | 5 | L2-3 vs. S2-3 | 264579_at               | AT1G05205 | Putative small nuclear ribonucleoprotein G;(source:Araport11)                                                                                                                                                                                                                                                                                   | 16.8   | 46.06   | 0.36 | 1.63E-05 | 5.44E-03 |
| 3574 | 5 | L2-3 vs. S2-3 | 266579_at               | AT2G23930 | Encodes a member of the auxin response factor family. Mediates auxin response via expression of auxin regulated genes. Acts redundantly with ARF6 to control stamen elongation and flower maturation. Expression of ARF8 is controlled by miR167.                                                                                               | 289.39 | 813.38  | 0.36 | 9.65E-05 | 8.72E-03 |
| 3575 | 5 | L2-3 vs. S2-3 | 249651_at               | AT5G37020 | Ubiquinol-cytochrome C reductase hinge protein;(source:Araport11)                                                                                                                                                                                                                                                                               | 114.19 | 318.63  | 0.36 | 2.01E-04 | 1.07E-02 |
| 3576 | 5 | L2-3 vs. S2-3 | 262593_at               | AT1G15120 | RPL24A encodes ribosomal protein L24, homolog of cytosolic RPL24, found in archaea and higher eukaryotes. Arabidopsis has two RPL24 homologs, RPL24A (AT2G36620) and RPL24B (AT3G53020).                                                                                                                                                        | 101.34 | 280.81  | 0.36 | 2.44E-04 | 1.09E-02 |
| 3577 | 5 | L2-3 vs. S2-3 | 265210_at               | AT2G36620 | Got1/Stt2-like vesicle transport protein family;(source:Araport11)                                                                                                                                                                                                                                                                              | 268.23 | 742.84  | 0.36 | 3.00E-04 | 1.13E-02 |
| 3578 | 5 | L2-3 vs. S2-3 | 252271_s_a              | AT5G01430 | Ribosomal protein L39 family protein;(source:Araport11)                                                                                                                                                                                                                                                                                         | 31.78  | 87.42   | 0.36 | 3.20E-04 | 1.15E-02 |
| 3579 | 5 | L2-3 vs. S2-3 | 259130_at               | AT3G02190 | RING/U-box superfamily protein;(source:Araport11)                                                                                                                                                                                                                                                                                               | 150.11 | 411.65  | 0.36 | 4.93E-04 | 1.37E-02 |
| 3580 | 5 | L2-3 vs. S2-3 | 246135_at               | AT5G20885 | ozone-responsive stress-like protein (DUF1138);(source:Araport11)                                                                                                                                                                                                                                                                               | 19.64  | 55.31   | 0.36 | 1.00E-03 | 1.81E-02 |
| 3581 | 5 | L2-3 vs. S2-3 | 261572_at               | AT1G01170 | encodes ferrochelatase I located in plastids. Involved in heme biosynthesis in non-photosynthetic tissues and induced by oxidative stress in photosynthetic tissues to supply heme for defensive hemoproteins The mRNA is cell-to-cell mobile.                                                                                                  | 183.33 | 528.54  | 0.35 | 5.22E-05 | 7.12E-03 |
| 3582 | 5 | L2-3 vs. S2-3 | 246870_at               | AT5G26030 | encodes cytosolic GADPH (C subunit) involved in the glycolytic pathway but also interacts with H2O2 potentially placing it in a signalling cascade induced by ROS. The mRNA is cell-to-cell mobile.                                                                                                                                             | 102.29 | 290.54  | 0.35 | 3.51E-04 | 1.18E-02 |
| 3583 | 5 | L2-3 vs. S2-3 | AFFX-r2-At-GAPDH-3_s_at | AT3G04120 |                                                                                                                                                                                                                                                                                                                                                 | 635.5  | 1837.5  | 0.35 | 6.29E-04 | 1.51E-02 |

|      |   |               |            |           |                                                                                                                                                                                                                                                                                                                                                                                                                                                                                                                                                                                                                                                                     |         |         |      |          |          |
|------|---|---------------|------------|-----------|---------------------------------------------------------------------------------------------------------------------------------------------------------------------------------------------------------------------------------------------------------------------------------------------------------------------------------------------------------------------------------------------------------------------------------------------------------------------------------------------------------------------------------------------------------------------------------------------------------------------------------------------------------------------|---------|---------|------|----------|----------|
| 3584 | 5 | L2-3 vs. S2-3 | 264872_at  | AT1G24260 | Member of the MADs box transcription factor family. SEP3 is redundant with SEP1 and 2. Flowers of SEP1/2/3 triple mutants show a conversion of petals and stamens to sepals.SEP3 forms heterotetrameric complexes with other MADS box family members and binds to the CarG box motif. bromodomain protein (DUF761);(source:Araport11)                                                                                                                                                                                                                                                                                                                               | 220.21  | 656.26  | 0.34 | 7.20E-05 | 7.69E-03 |
| 3585 | 5 | L2-3 vs. S2-3 | 266845_at  | AT2G26110 |                                                                                                                                                                                                                                                                                                                                                                                                                                                                                                                                                                                                                                                                     | 17.39   | 50.86   | 0.34 | 1.52E-04 | 1.02E-02 |
| 3586 | 5 | L2-3 vs. S2-3 | 255149_at  | AT4G08150 | A member of class I knotted1-like homeobox gene family (together with KNAT2). Similar to the knotted1 (kn1) homeobox gene of maize. Normally expressed in the peripheral and rib zone of shoot apical meristem but not in the leaf primordia. It is also expressed in the fourth floral whorl, in the region that would become style, particularly in the cell surrounding the transmitting tissue. No expression was detected in the first three floral whorls. Expression is repressed by auxin and AS1 which results in the promotion of leaf fate. Bifunctional inhibitor/lipid-transfer protein/seed storage 2S albumin superfamily protein;(source:Araport11) | 13.8    | 41.02   | 0.34 | 2.22E-04 | 1.07E-02 |
| 3587 | 5 | L2-3 vs. S2-3 | 265400_at  | AT2G10940 | Proline-rich extensin-like family protein;(source:Araport11)                                                                                                                                                                                                                                                                                                                                                                                                                                                                                                                                                                                                        | 49.78   | 146.78  | 0.34 | 4.50E-04 | 1.30E-02 |
| 3588 | 5 | L2-3 vs. S2-3 | 263552_x_a | AT2G24980 | zinc finger/BTB domain protein;(source:Araport11)                                                                                                                                                                                                                                                                                                                                                                                                                                                                                                                                                                                                                   | 15.6    | 46.23   | 0.34 | 7.74E-04 | 1.70E-02 |
| 3589 | 5 | L2-3 vs. S2-3 | 262000_at  | AT1G33810 |                                                                                                                                                                                                                                                                                                                                                                                                                                                                                                                                                                                                                                                                     | 67.03   | 205.75  | 0.33 | 1.50E-05 | 5.44E-03 |
| 3590 | 5 | L2-3 vs. S2-3 | 249313_at  | AT5G41560 | Encodes a substrate receptor for CRL4-CDD complexes that provides substrate specificity for CRL4 by interacting with ubiquitination targets. By its interaction and regulation of levels of PYL8 through proteasomal degradation, it negatively regulates ABA-mediated developmental responses, including inhibition of seed germination, seedling establishment, and root growth Mitochondrial F1F0-ATP synthase. purple acid phosphatase 24;(source:Araport11)                                                                                                                                                                                                    | 16.05   | 49.33   | 0.33 | 7.75E-05 | 7.98E-03 |
| 3591 | 5 | L2-3 vs. S2-3 | 252524_at  | AT3G46430 |                                                                                                                                                                                                                                                                                                                                                                                                                                                                                                                                                                                                                                                                     | 210.97  | 642.92  | 0.33 | 1.09E-04 | 9.20E-03 |
| 3592 | 5 | L2-3 vs. S2-3 | 254111_at  | AT4G24890 |                                                                                                                                                                                                                                                                                                                                                                                                                                                                                                                                                                                                                                                                     | 22.39   | 68.87   | 0.33 | 2.37E-04 | 1.09E-02 |
| 3593 | 5 | L2-3 vs. S2-3 | 262490_at  | AT1G21840 | Encodes a urease accessory protein which is essential for the activation of plant urease. Encodes a member of the PYR (pyrabactin resistance )/PYL(PYL1-like)/RCAR (regulatory components of ABA receptor) family proteins with 14 members. PYR/PYL/RCAR family proteins function as abscisic acid sensors. Mediate ABA-dependent regulation of protein phosphatase 2Cs AB11 and AB12. Ribosomal L5P family protein;(source:Araport11)                                                                                                                                                                                                                              | 23.56   | 71.05   | 0.33 | 2.88E-04 | 1.13E-02 |
| 3594 | 5 | L2-3 vs. S2-3 | 250777_at  | AT5G05440 | PLATZ transcription factor family protein;(source:Araport11)                                                                                                                                                                                                                                                                                                                                                                                                                                                                                                                                                                                                        | 28.2    | 86.21   | 0.33 | 3.27E-04 | 1.15E-02 |
| 3595 | 5 | L2-3 vs. S2-3 | 266044_s_a | AT2G07725 |                                                                                                                                                                                                                                                                                                                                                                                                                                                                                                                                                                                                                                                                     | 21.65   | 65.68   | 0.33 | 4.33E-04 | 1.30E-02 |
| 3596 | 5 | L2-3 vs. S2-3 | 254694_at  | AT4G17900 |                                                                                                                                                                                                                                                                                                                                                                                                                                                                                                                                                                                                                                                                     | 80.34   | 252.31  | 0.32 | 9.20E-04 | 1.77E-02 |
| 3597 | 5 | L2-3 vs. S2-3 | 257051_at  | AT3G15270 | Encodes a member of the SPL (squamosa-promoter binding protein-like)gene family, a novel gene family encoding DNA binding proteins and putative transcription factors. Contains the SBP-box, which encodes the SBP-domain, required and sufficient for interaction with DNA. It is involved in regulation of flowering and vegetative phase change. Its temporal expression is regulated by the microRNA miR156. The target site for the microRNA is in the 3'UTR. chloroplast gene encoding a ribosomal protein L16, which is a constituent of 50S large ribosomal subunit                                                                                         | 20.22   | 62.69   | 0.32 | 9.31E-04 | 1.77E-02 |
| 3598 | 5 | L2-3 vs. S2-3 | 244982_at  | ATCG00790 | Similar to myrosinase binding proteins which may be involved in metabolizing glucosinolates and forming defense compounds to protect against herbivory. Also similar to lectins and other agglutinating factors. Expressed only in flowers. Ribosomal L27e protein family;(source:Araport11)                                                                                                                                                                                                                                                                                                                                                                        | 1039.48 | 3301.03 | 0.31 | 2.14E-04 | 1.07E-02 |
| 3599 | 5 | L2-3 vs. S2-3 | 265058_s_a | AT1G52030 | Encodes chalcone synthase (CHS), a key enzyme involved in the biosynthesis of flavonoids. Required for the accumulation of purple anthocyanins in leaves and stems. Also involved in the regulation of auxin transport and the modulation of root gravitropism. The mRNA is cell-to-cell mobile. transmembrane protein;(source:Araport11)                                                                                                                                                                                                                                                                                                                           | 830.18  | 2710.8  | 0.31 | 3.51E-04 | 1.18E-02 |
| 3600 | 5 | L2-3 vs. S2-3 | 256794_at  | AT3G22230 | Predicted to encode a PR (pathogenesis-related) protein. Belongs to the plant defensin (PDF) family with the following members: At1g75830/PDF1.1, At5g44420/PDF1.2a, At2g26020/PDF1.2b, At5g44430/PDF1.2c, At2g26010/PDF1.3, At1g19610/PDF1.4, At1g55010/PDF1.5, At2g02120/PDF2.1, At2g02100/PDF2.2, At2g02130/PDF2.3, At1g61070/PDF2.4, At5g63660/PDF2.5, At2g02140/PDF2.6, At5g38330/PDF3.1 and At4g30070/PDF3.2. The mRNA is cell-to-cell mobile.                                                                                                                                                                                                                | 28.31   | 90.53   | 0.31 | 3.83E-04 | 1.21E-02 |
| 3601 | 5 | L2-3 vs. S2-3 | 250207_at  | AT5G13930 | Encodes a cytochrome p450 enzyme that catalyzes the initial conversion of aldoximes to thiohydroximates in the synthesis of glucosinolates not derived from tryptophan. Also has a role in auxin homeostasis.                                                                                                                                                                                                                                                                                                                                                                                                                                                       | 31.24   | 101.54  | 0.31 | 7.81E-04 | 1.70E-02 |
| 3602 | 5 | L2-3 vs. S2-3 | 252789_s_a | AT1G21930 |                                                                                                                                                                                                                                                                                                                                                                                                                                                                                                                                                                                                                                                                     | 303.58  | 968.98  | 0.31 | 8.33E-04 | 1.74E-02 |
| 3603 | 5 | L2-3 vs. S2-3 | 266119_at  | AT2G02100 |                                                                                                                                                                                                                                                                                                                                                                                                                                                                                                                                                                                                                                                                     | 474.83  | 1567.69 | 0.3  | 2.84E-05 | 6.15E-03 |
| 3604 | 5 | L2-3 vs. S2-3 | 254687_at  | AT4G13770 |                                                                                                                                                                                                                                                                                                                                                                                                                                                                                                                                                                                                                                                                     | 34.15   | 114.14  | 0.3  | 9.68E-05 | 8.72E-03 |

|      |   |               |            |           |                                                                                                                                                                                                                                                                                                                                                                                                                                                                                                                     |        |         |      |          |          |
|------|---|---------------|------------|-----------|---------------------------------------------------------------------------------------------------------------------------------------------------------------------------------------------------------------------------------------------------------------------------------------------------------------------------------------------------------------------------------------------------------------------------------------------------------------------------------------------------------------------|--------|---------|------|----------|----------|
| 3605 | 5 | L2-3 vs. S2-3 | 258851_at  | AT3G03190 | Encodes glutathione transferase belonging to the phi class of GSTs. Naming convention according to Wagner et al. (2002).                                                                                                                                                                                                                                                                                                                                                                                            | 14.27  | 46.86   | 0.3  | 1.67E-04 | 1.02E-02 |
| 3606 | 5 | L2-3 vs. S2-3 | 250517_at  | AT5G08260 | serine carboxypeptidase-like 35;(source:Araport11)                                                                                                                                                                                                                                                                                                                                                                                                                                                                  | 30.93  | 104.69  | 0.3  | 5.94E-04 | 1.51E-02 |
| 3607 | 5 | L2-3 vs. S2-3 | 261053_at  | AT1G01320 | Encodes REDUCED CHLOROPLAST COVERAGE 1 (REC1). Located in the nucleus and cytosol. Contributes to establishing the size of the chloroplast compartment.                                                                                                                                                                                                                                                                                                                                                             | 31.89  | 111.07  | 0.29 | 1.67E-04 | 1.02E-02 |
| 3608 | 5 | L2-3 vs. S2-3 | 250565_at  | AT5G08000 | Encodes a member of the X8-GPI family of proteins. It localizes to the plasmodesmata and binds callose.                                                                                                                                                                                                                                                                                                                                                                                                             | 163.97 | 586.64  | 0.28 | 3.00E-05 | 6.15E-03 |
| 3609 | 5 | L2-3 vs. S2-3 | 259617_at  | AT1G47970 | nucleolin;(source:Araport11)                                                                                                                                                                                                                                                                                                                                                                                                                                                                                        | 65.42  | 231.29  | 0.28 | 1.66E-04 | 1.02E-02 |
| 3610 | 5 | L2-3 vs. S2-3 | 253482_at  | AT4G31985 | Expressed protein                                                                                                                                                                                                                                                                                                                                                                                                                                                                                                   | 719.61 | 2564.96 | 0.28 | 2.01E-04 | 1.07E-02 |
| 3611 | 5 | L2-3 vs. S2-3 | 253202_at  | AT4G34555 | Ribosomal protein S25 family protein;(source:Araport11)                                                                                                                                                                                                                                                                                                                                                                                                                                                             | 312.4  | 1103.02 | 0.28 | 3.28E-04 | 1.15E-02 |
| 3612 | 5 | L2-3 vs. S2-3 | 261738_s_a | AT1G47813 | hypothetical protein;(source:Araport11)                                                                                                                                                                                                                                                                                                                                                                                                                                                                             | 55.95  | 202.83  | 0.28 | 8.81E-04 | 1.75E-02 |
| 3613 | 5 | L2-3 vs. S2-3 | 249492_at  | AT5G39160 | RmlC-like cupins superfamily protein;(source:Araport11)                                                                                                                                                                                                                                                                                                                                                                                                                                                             | 9.23   | 34.02   | 0.27 | 1.12E-04 | 9.20E-03 |
| 3614 | 5 | L2-3 vs. S2-3 | 260538_at  | AT2G43460 | Ribosomal L38e protein family;(source:Araport11)                                                                                                                                                                                                                                                                                                                                                                                                                                                                    | 917.33 | 3393.19 | 0.27 | 1.21E-04 | 9.20E-03 |
| 3615 | 5 | L2-3 vs. S2-3 | 264173_at  | AT1G02160 | Cox19 family protein (CHCH motif);(source:Araport11)                                                                                                                                                                                                                                                                                                                                                                                                                                                                | 143.99 | 532.06  | 0.27 | 4.38E-04 | 1.30E-02 |
| 3616 | 5 | L2-3 vs. S2-3 | 265844_at  | AT2G35620 | Encodes a plasma membrane localized leucine-rich repeat receptor kinase that is involved in cell wall elongation. Loss of function mutations of FEI1 and FEI2 exhibit defects in root and hypocotyl cell elongation. Double mutants are defective in cell wall biosynthesis and have thick hypocotyls, and short, thick roots. Mucilage is easily detached from fei2 mutants seeds, and forms a capsule that is >50% smaller relative to wild-type.                                                                 | 17.18  | 62.6    | 0.27 | 8.61E-04 | 1.75E-02 |
| 3617 | 5 | L2-3 vs. S2-3 | 265741_at  | AT2G01320 | ABC-2 type transporter family protein;(source:Araport11)                                                                                                                                                                                                                                                                                                                                                                                                                                                            | 20.29  | 78.51   | 0.26 | 6.34E-04 | 1.52E-02 |
| 3618 | 5 | L2-3 vs. S2-3 | 266906_at  | AT2G34585 | transmembrane protein;(source:Araport11)                                                                                                                                                                                                                                                                                                                                                                                                                                                                            | 102.74 | 409.72  | 0.25 | 1.85E-05 | 5.48E-03 |
| 3619 | 5 | L2-3 vs. S2-3 | 255140_x_a | AT4G08410 | Proline-rich extensin-like family protein;(source:Araport11)                                                                                                                                                                                                                                                                                                                                                                                                                                                        | 22.02  | 89.21   | 0.25 | 3.77E-04 | 1.20E-02 |
| 3620 | 5 | L2-3 vs. S2-3 | 253627_at  | AT4G30650 | Low temperature and salt responsive protein family;(source:Araport11)                                                                                                                                                                                                                                                                                                                                                                                                                                               | 53.96  | 216.57  | 0.25 | 8.53E-04 | 1.75E-02 |
| 3621 | 5 | L2-3 vs. S2-3 | 259090_at  | AT3G04920 | Ribosomal protein S24e family protein;(source:Araport11)                                                                                                                                                                                                                                                                                                                                                                                                                                                            | 93.91  | 396.14  | 0.24 | 1.62E-04 | 1.02E-02 |
| 3622 | 5 | L2-3 vs. S2-3 | 256475_s_a | AT1G42680 | P-loop containing nucleoside triphosphate hydrolases superfamily protein;(source:Araport11)                                                                                                                                                                                                                                                                                                                                                                                                                         | 9.74   | 40.42   | 0.24 | 2.54E-04 | 1.11E-02 |
| 3623 | 5 | L2-3 vs. S2-3 | 260257_at  | AT1G74340 | Encodes a subunit of the dolichol phosphate mannanase synthase (DPMS) complex that may serve as membrane anchors for the catalytic core, DPMS1, or provide catalytic assistance. It is localized in the ER and mediates isoprenyl-linked glycan biogenesis.                                                                                                                                                                                                                                                         | 86.12  | 360.13  | 0.24 | 2.64E-04 | 1.12E-02 |
| 3624 | 5 | L2-3 vs. S2-3 | 254137_at  | AT4G24930 | thylakoid lumenal 17.9 kDa protein, chloroplast;(source:Araport11)                                                                                                                                                                                                                                                                                                                                                                                                                                                  | 26.08  | 106.68  | 0.24 | 2.91E-04 | 1.13E-02 |
| 3625 | 5 | L2-3 vs. S2-3 | 258003_at  | AT3G29030 | Encodes an expansin. Naming convention from the Expansin Working Group (Kende et al, 2004. Plant Mol Bio)                                                                                                                                                                                                                                                                                                                                                                                                           | 35.24  | 147.73  | 0.24 | 7.51E-04 | 1.68E-02 |
| 3626 | 5 | L2-3 vs. S2-3 | 261598_at  | AT1G49750 | Leucine-rich repeat (LRR) family protein;(source:Araport11)<br>Predicted to encode a PR (pathogenesis-related) protein. Belongs to the plant defensin (PDF) family with the following members: At1g75830/PDF1.1, At5g44420/PDF1.2a, At2g26020/PDF1.2b, At5g44430/PDF1.2c, At2g26010/PDF1.3, At1g19610/PDF1.4, At1g55010/PDF1.5, At2g02120/PDF2.1, At2g02100/PDF2.2, At2g02130/PDF2.3, At1g61070/PDF2.4, At5g63660/PDF2.5, At2g02140/PDF2.6, At5g38330/PDF3.1 and At4g30070/PDF3.2. The mRNA is cell-to-cell mobile. | 20.45  | 86.92   | 0.24 | 8.94E-04 | 1.75E-02 |
| 3627 | 5 | L2-3 vs. S2-3 | 266118_at  | AT2G02130 | Encodes a member of the auxin response factor family. Mediates auxin response via expression of auxin regulated genes. Acts redundantly with ARF8 to control stamen elongation and flower maturation. Expression of ARF6 is controlled by miR167.                                                                                                                                                                                                                                                                   | 38.81  | 166.58  | 0.23 | 1.52E-05 | 5.44E-03 |
| 3628 | 5 | L2-3 vs. S2-3 | 256311_at  | AT1G30330 | proline-rich family protein;(source:Araport11)                                                                                                                                                                                                                                                                                                                                                                                                                                                                      | 277.8  | 1207.57 | 0.23 | 7.18E-05 | 7.69E-03 |
| 3629 | 5 | L2-3 vs. S2-3 | 254559_at  | AT4G19200 |                                                                                                                                                                                                                                                                                                                                                                                                                                                                                                                     | 46.93  | 201.11  | 0.23 | 1.56E-04 | 1.02E-02 |
| 3630 | 5 | L2-3 vs. S2-3 | 260632_at  | AT1G62360 | Class I knotted-like homeodomain protein that is required for shoot apical meristem (SAM) formation during embryogenesis and for SAM function throughout the lifetime of the plant. Functions by preventing incorporation of cells in the meristem center into differentiating organ primordia. It has also been shown to have a role in the specification of flower meristem identity.                                                                                                                             | 26.58  | 118.12  | 0.23 | 4.42E-04 | 1.30E-02 |
| 3631 | 5 | L2-3 vs. S2-3 | 260421_at  | AT1G69640 | Encodes one of the two redundant sphingoid base hydroxylases (SBH). Involved in sphingolipid trihydroxy long-chain base (4-hydroxysphinganine) biosynthesis. Double mutants of SBHs were dwarfed and not able to progress from vegetative to reproductive growth.                                                                                                                                                                                                                                                   | 22.66  | 96.88   | 0.23 | 6.28E-04 | 1.51E-02 |
| 3632 | 5 | L2-3 vs. S2-3 | 266460_at  | AT2G47930 | arabinogalactan protein 26;(source:Araport11)                                                                                                                                                                                                                                                                                                                                                                                                                                                                       | 14.77  | 67.03   | 0.22 | 1.52E-04 | 1.02E-02 |

|      |   |               |                         |           |                                                                                                                                                                                                                                                                                                                                                                                        |        |         |      |          |          |
|------|---|---------------|-------------------------|-----------|----------------------------------------------------------------------------------------------------------------------------------------------------------------------------------------------------------------------------------------------------------------------------------------------------------------------------------------------------------------------------------------|--------|---------|------|----------|----------|
| 3633 | 5 | L2-3 vs. S2-3 | 245842_at               | AT1G58430 | Encodes an anther-specific proline-rich protein.                                                                                                                                                                                                                                                                                                                                       | 12.89  | 58.56   | 0.22 | 1.97E-04 | 1.07E-02 |
| 3634 | 5 | L2-3 vs. S2-3 | 263420_at               | AT2G17240 | Participates in the late stages of the biogenesis of 50S ribosomal subunits in plastids.                                                                                                                                                                                                                                                                                               | 80.15  | 363.8   | 0.22 | 2.91E-04 | 1.13E-02 |
| 3635 | 5 | L2-3 vs. S2-3 | 262602_at               | AT1G15270 | Translation machinery associated TMA7;(source:Araport11)                                                                                                                                                                                                                                                                                                                               | 91.33  | 406.35  | 0.22 | 4.69E-04 | 1.34E-02 |
| 3636 | 5 | L2-3 vs. S2-3 | 251007_at               | AT5G02610 | Ribosomal L29 family protein;(source:Araport11)                                                                                                                                                                                                                                                                                                                                        | 95.83  | 462.04  | 0.21 | 1.05E-05 | 5.44E-03 |
| 3637 | 5 | L2-3 vs. S2-3 | 265768_at               | AT2G48020 | Encodes a zinc transporter ZIF2. Expression of ZIF2 is regulated by alternative splicing.                                                                                                                                                                                                                                                                                              | 67.38  | 322.79  | 0.21 | 1.16E-05 | 5.44E-03 |
| 3638 | 5 | L2-3 vs. S2-3 | 250682_x_a              | AT5G06630 | proline-rich extensin-like family protein;(source:Araport11)<br>Encodes a member of the CC-type glutaredoxin (ROXY) family that has been shown to interact with the transcription factor TGA2.                                                                                                                                                                                         | 13.41  | 64.2    | 0.21 | 2.98E-04 | 1.13E-02 |
| 3639 | 5 | L2-3 vs. S2-3 | 253382_at<br>261864_s_a | AT4G33040 |                                                                                                                                                                                                                                                                                                                                                                                        | 131.96 | 625.42  | 0.21 | 8.38E-04 | 1.74E-02 |
| 3640 | 5 | L2-3 vs. S2-3 | 259331_t                | AT1G50480 | 10-formyltetrahydrofolate synthetase (THFS) mRNA, complete The mRNA is cell-to-cell mobile.                                                                                                                                                                                                                                                                                            | 268.01 | 1361.47 | 0.2  | 1.86E-04 | 1.06E-02 |
| 3641 | 5 | L2-3 vs. S2-3 | 259331_at               | AT3G03840 | SAUR-like auxin-responsive protein family;(source:Araport11)                                                                                                                                                                                                                                                                                                                           | 8.78   | 44.62   | 0.2  | 2.88E-04 | 1.13E-02 |
| 3642 | 5 | L2-3 vs. S2-3 | 247900_at               | AT5G57290 | 60S acidic ribosomal protein family;(source:Araport11)                                                                                                                                                                                                                                                                                                                                 | 205.64 | 1070.45 | 0.19 | 1.05E-04 | 9.04E-03 |
| 3643 | 5 | L2-3 vs. S2-3 | 257701_at               | AT3G12710 | DNA glycosylase superfamily protein;(source:Araport11)                                                                                                                                                                                                                                                                                                                                 | 23.36  | 125.8   | 0.19 | 4.99E-04 | 1.38E-02 |
| 3644 | 5 | L2-3 vs. S2-3 | 250007_at               | AT5G18670 | putative beta-amylase BMY3 (BMY3)<br>Encodes NRG1A, a putative mitochondrial pyruvate carrier that mediates ABA regulation of guard cell ion channels and drought stress responses.                                                                                                                                                                                                    | 657.13 | 3474.2  | 0.19 | 8.85E-04 | 1.75E-02 |
| 3645 | 5 | L2-3 vs. S2-3 | 255243_at               | AT4G05590 | member of eIF3c - eukaryotic initiation factor 3c                                                                                                                                                                                                                                                                                                                                      | 11.07  | 62.45   | 0.18 | 7.01E-04 | 1.62E-02 |
| 3646 | 5 | L2-3 vs. S2-3 | 251738_at               | AT3G56150 | secE/sec61-gamma protein transport protein;(source:Araport11)                                                                                                                                                                                                                                                                                                                          | 26.59  | 146.45  | 0.18 | 8.82E-04 | 1.75E-02 |
| 3647 | 5 | L2-3 vs. S2-3 | 254083_at               | AT4G24920 |                                                                                                                                                                                                                                                                                                                                                                                        | 141.54 | 783.15  | 0.18 | 9.64E-04 | 1.78E-02 |
| 3648 | 5 | L2-3 vs. S2-3 | 247450_at               | AT5G62350 | Plant invertase/pectin methylesterase inhibitor superfamily protein;(source:Araport11)                                                                                                                                                                                                                                                                                                 | 122.54 | 740.75  | 0.17 | 3.62E-04 | 1.19E-02 |
| 3649 | 5 | L2-3 vs. S2-3 | 247148_at               | AT5G65670 | auxin (indole-3-acetic acid) induced gene The mRNA is cell-to-cell mobile.                                                                                                                                                                                                                                                                                                             | 215.33 | 1258.07 | 0.17 | 9.49E-04 | 1.77E-02 |
| 3650 | 5 | L2-3 vs. S2-3 | 265984_at               | AT2G24210 | terpene synthase 10;(source:Araport11)                                                                                                                                                                                                                                                                                                                                                 | 12.61  | 78.07   | 0.16 | 6.73E-04 | 1.58E-02 |
| 3651 | 5 | L2-3 vs. S2-3 | 259156_at               | AT3G10380 | Subunit of the Putative Arabidopsis Exocyst Complex<br>Cytosolic ribosomal protein. Similar to EVR1 and redundant with EVR1. Also enhances VAR2 mutant variegation, but to a lesser extent than evr1.<br>Encodes a putative 2OG-Fe(II) oxygenase that is defense-associated but required for susceptibility to downy mildew. The mRNA is cell-to-cell mobile.                          | 38.31  | 243.56  | 0.16 | 7.91E-04 | 1.71E-02 |
| 3652 | 5 | L2-3 vs. S2-3 | 246747_at               | AT5G27700 | Endoplasmic reticulum enzyme responsible for the synthesis of 18:3 fatty acids from phospholipids.                                                                                                                                                                                                                                                                                     | 289.89 | 1984.55 | 0.15 | 1.33E-04 | 9.58E-03 |
| 3653 | 5 | L2-3 vs. S2-3 | 249754_at               | AT5G24530 | Uses cytochrome b5 as electron donor.<br>A member of ARF GTPase family. A thaliana has 21 members of this family, known to be essential for vesicle coating and uncoating and functions in GTP-binding. Gene encoding ADP-ribosylation factor and similar to ADP-ribosylation factor 1; ARF 1 (GP:385340) (Drosophila melanogaster), other ARFs and ARF-like proteins.                 | 37.61  | 254.74  | 0.15 | 2.22E-04 | 1.07E-02 |
| 3654 | 5 | L2-3 vs. S2-3 | 266865_at               | AT2G29980 |                                                                                                                                                                                                                                                                                                                                                                                        | 58.59  | 402.93  | 0.15 | 3.08E-04 | 1.14E-02 |
| 3655 | 5 | L2-3 vs. S2-3 | 246422_at               | AT5G17060 |                                                                                                                                                                                                                                                                                                                                                                                        | 56.01  | 372.73  | 0.15 | 9.54E-04 | 1.77E-02 |
| 3656 | 5 | L2-3 vs. S2-3 | 254915_s_a              | AT4G11310 | cysteine proteinase precursor-like protein                                                                                                                                                                                                                                                                                                                                             | 12.51  | 88.99   | 0.14 | 9.00E-07 | 2.59E-03 |
| 3657 | 5 | L2-3 vs. S2-3 | 244986_at               | ATCG00820 | Encodes a 6.8-kDa protein of the small ribosomal subunit.                                                                                                                                                                                                                                                                                                                              | 183.08 | 1292.8  | 0.14 | 2.30E-06 | 3.31E-03 |
| 3658 | 5 | L2-3 vs. S2-3 | 261489_at               | AT1G14450 | NADH dehydrogenase (ubiquinone)s;(source:Araport11)                                                                                                                                                                                                                                                                                                                                    | 43.62  | 315.96  | 0.14 | 5.33E-05 | 7.12E-03 |
| 3659 | 5 | L2-3 vs. S2-3 | 254163_s_a              | AT4G24350 | Phosphorylase superfamily protein;(source:Araport11)                                                                                                                                                                                                                                                                                                                                   | 23.53  | 165.3   | 0.14 | 1.16E-04 | 9.20E-03 |
| 3660 | 5 | L2-3 vs. S2-3 | 255298_at               | AT4G04840 | methionine sulfoxide reductase B6;(source:Araport11)                                                                                                                                                                                                                                                                                                                                   | 17.45  | 124.41  | 0.14 | 2.03E-04 | 1.07E-02 |
| 3661 | 5 | L2-3 vs. S2-3 | 247776_at               | AT5G58700 | phosphatidylinositol-specific phospholipase C4;(source:Araport11)                                                                                                                                                                                                                                                                                                                      | 40.84  | 321.71  | 0.13 | 5.46E-05 | 7.12E-03 |
| 3662 | 5 | L2-3 vs. S2-3 | 267298_at               | AT2G23760 | Encodes a member of the BEL family of homeodomain proteins. Plants doubly mutant for saw1/saw2 (blh2/blh4) have serrated leaves. BP is expressed in the serrated leaves, therefore saw2 and saw1 may act redundantly to repress BP in leaves. Regulates together with BLH2 demethylesterification of homogalacturonan in seed mucilage.                                                | 10.66  | 82.17   | 0.13 | 1.63E-04 | 1.02E-02 |
| 3663 | 5 | L2-3 vs. S2-3 | 267239_at               | AT2G02510 | NADH dehydrogenase (ubiquinone)s;(source:Araport11)                                                                                                                                                                                                                                                                                                                                    | 121.3  | 984.95  | 0.12 | 1.14E-05 | 5.44E-03 |
| 3664 | 5 | L2-3 vs. S2-3 | 260297_at               | AT1G80280 | alpha/beta-Hydrolases superfamily protein;(source:Araport11)                                                                                                                                                                                                                                                                                                                           | 23.14  | 196.05  | 0.12 | 1.32E-04 | 9.58E-03 |
| 3665 | 5 | L2-3 vs. S2-3 | 247162_at               | AT5G65730 | xyloglucan endotransglucosylase/hydrolase 6;(source:Araport11)<br>An Arabidopsis thaliana homolog of Medicago truncatula NODULIN21 (MtN21). The gene encodes a plant-specific, predicted integral membrane protein and is a member of the Plant-Drug/Metabolite Exporter (P-DME) family (Transporter Classification number: TC 2.A.7.3) and the nodulin MtN21-like transporter family. | 12.82  | 102.75  | 0.12 | 2.26E-04 | 1.07E-02 |
| 3666 | 5 | L2-3 vs. S2-3 | 262951_at               | AT1G75500 | Part of the AtHVA22 family. Protein expression is ABA- and stress-inducible. The mRNA is cell-to-cell mobile.                                                                                                                                                                                                                                                                          | 52.15  | 464.06  | 0.11 | 4.13E-05 | 6.43E-03 |
| 3667 | 5 | L2-3 vs. S2-3 | 260368_at               | AT1G69700 | Bifunctional inhibitor/lipid-transfer protein/seed storage 2S albumin superfamily protein;(source:Araport11)                                                                                                                                                                                                                                                                           | 41.84  | 406.99  | 0.1  | 1.70E-04 | 1.02E-02 |
| 3668 | 5 | L2-3 vs. S2-3 | 266123_at               | AT2G45180 |                                                                                                                                                                                                                                                                                                                                                                                        | 68.23  | 665.55  | 0.1  | 2.50E-04 | 1.10E-02 |



|      |   |               |                         |           |                                                                                                                                                                                                                                                                                                                                                                              |         |         |       |          |          |
|------|---|---------------|-------------------------|-----------|------------------------------------------------------------------------------------------------------------------------------------------------------------------------------------------------------------------------------------------------------------------------------------------------------------------------------------------------------------------------------|---------|---------|-------|----------|----------|
| 3669 | 5 | L2-3 vs. S2-3 | 263867_at               | AT2G36830 | Encodes a tonoplast intrinsic protein, which functions as water channel. It has also been shown to be able to facilitate the transport of urea and hydrogen peroxide. Highly expressed in vascular tissues of the root, stem, cauline leaves and flowers but not in the apical meristems. The mRNA is cell-to-cell mobile.                                                   | 96.44   | 1068.2  | 0.09  | 5.56E-05 | 7.12E-03 |
| 3670 | 5 | L2-3 vs. S2-3 | 245009_at<br>245928_s_a | ATCG00380 | Chloroplast encoded ribosomal protein S4 encodes an acid phosphatase similar to soybean vegetative storage proteins. Gene expression is induced by wounding and jasmonic acid.                                                                                                                                                                                               | 77.02   | 1159.86 | 0.066 | 6.13E-04 | 1.51E-02 |
| 3671 | 5 | L2-3 vs. S2-3 | t                       | AT5G24780 | calnexin 1;(source:Araport11)                                                                                                                                                                                                                                                                                                                                                | 40.49   | 710.31  | 0.057 | 4.67E-04 | 1.34E-02 |
| 3672 | 5 | L2-3 vs. S2-3 | 247494_at               | AT5G61790 | Pectin methylesterase inhibitor expressed throughout the plant.                                                                                                                                                                                                                                                                                                              | 57.21   | 1105.77 | 0.052 | 3.47E-05 | 6.25E-03 |
| 3673 | 5 | L2-3 vs. S2-3 | 247478_at               | AT5G62360 | Encodes a cytosolic 6-phosphogluconolactonase (PGL) thought to be involved in the oxidative pentose-phosphate pathway (OPPP).                                                                                                                                                                                                                                                | 9.78    | 186.62  | 0.052 | 5.90E-05 | 7.20E-03 |
| 3674 | 5 | L2-3 vs. S2-3 | 249732_at               | AT5G24420 |                                                                                                                                                                                                                                                                                                                                                                              | 9.96    | 195.99  | 0.051 | 2.09E-05 | 5.48E-03 |
| 3675 | 5 | L2-3 vs. S2-3 | 245138_at               | AT2G45190 | Encodes a member of the YABBY family of transcriptional regulators that is involved in abaxial cell type specification in leaves and fruits. YAB1 acts in a non-cell autonomous fashion within the meristem to affect phyllotactic patterning. The non-autonomous effect on the central region of the meristem is mediated through the activity of Lateral Suppressor (LAS). | 19.81   | 455.16  | 0.044 | 4.80E-06 | 4.61E-03 |
| 3676 | 5 | L2-3 vs. S2-3 | 267213_at               | AT2G44120 | Ribosomal protein L30/L7 family protein;(source:Araport11)                                                                                                                                                                                                                                                                                                                   | 14.9    | 349.33  | 0.043 | 8.60E-06 | 5.44E-03 |
| 3677 | 5 | L2-3 vs. S2-3 | 247553_at               | AT5G60910 | MADS box gene negatively regulated by APETALA1 Encodes a putative transcriptional regulator that is involved in the vegetative to reproductive phase transition. Expression is regulated by MIR156b. SPL activity nonautonomously inhibits initiation of new leaves at the shoot apical meristem.                                                                            | 13.82   | 398.67  | 0.035 | 7.00E-07 | 2.59E-03 |
| 3678 | 5 | L2-3 vs. S2-3 | 267639_at               | AT2G42200 | Encodes a nitrile-specifier protein NSP4. NSP4 is one out of five (At3g16400/NSP1, At2g33070/NSP2, At3g16390/NSP3, At3g16410/NSP4 and At5g48180/NSP5) A. thaliana epithiospecifier protein (ESP) homologues that promote simple nitrile, but not epithionitrile or thiocyanate formation. The mRNA is cell-to-cell mobile.                                                   | 18.65   | 575.57  | 0.032 | 1.70E-06 | 3.27E-03 |
| 3679 | 5 | L2-3 vs. S2-3 | 259381_s_a<br>t         | AT3G16410 | Ribosomal protein L30/L7 family protein;(source:Araport11)                                                                                                                                                                                                                                                                                                                   | 17.51   | 764.71  | 0.023 | 4.50E-06 | 4.61E-03 |
| 3680 | 6 | M2-3 vs. S2-3 | 256648_at               | AT3G13580 | ATPase III subunit                                                                                                                                                                                                                                                                                                                                                           | 1400.94 | 19.48   | 71.92 | 4.84E-05 | 7.54E-03 |
| 3681 | 6 | M2-3 vs. S2-3 | 245026_at               | ATCG00140 | cytosolic beta-amylase expressed in rosette leaves and inducible by sugar. RAM1 mutants have reduced beta amylase in leaves and stems.                                                                                                                                                                                                                                       | 3590.3  | 54.19   | 66.25 | 4.12E-05 | 6.79E-03 |
| 3682 | 6 | M2-3 vs. S2-3 | 245275_at               | AT4G15210 | PSII L protein                                                                                                                                                                                                                                                                                                                                                               | 665.13  | 32.89   | 20.23 | 8.71E-04 | 1.98E-02 |
| 3683 | 6 | M2-3 vs. S2-3 | 244964_at               | ATCG00560 | ATPase subunit 6                                                                                                                                                                                                                                                                                                                                                             | 4123.17 | 250.76  | 16.44 | 1.59E-04 | 1.29E-02 |
| 3684 | 6 | M2-3 vs. S2-3 | 266012_s_a              | ATMG00410 | Encodes putative proliferating cell nuclear antigen involved in cell cycle regulation. May be sumoylated.                                                                                                                                                                                                                                                                    | 923.9   | 79.17   | 11.67 | 3.34E-05 | 6.43E-03 |
| 3685 | 6 | M2-3 vs. S2-3 | 261080_at               | AT1G07370 | Encodes a high affinity H+:<i>myo</i>-inositol symporter. The only other compound shown to be transported was pinitol, a methylated derivative of <i>myo</i>-inositol. The mRNA is cell-to-cell mobile.                                                                                                                                                                      | 226.35  | 20.93   | 10.81 | 3.30E-05 | 6.43E-03 |
| 3686 | 6 | M2-3 vs. S2-3 | 245499_at               | AT4G16480 | hypothetical protein;(source:Araport11)                                                                                                                                                                                                                                                                                                                                      | 516.84  | 49.91   | 10.35 | 5.40E-04 | 1.70E-02 |
| 3687 | 6 | M2-3 vs. S2-3 | 244959_s_a              | AT2G07708 |                                                                                                                                                                                                                                                                                                                                                                              | 197.24  | 21.09   | 9.35  | 2.40E-04 | 1.35E-02 |
| 3688 | 6 | M2-3 vs. S2-3 | 266391_at               | AT2G41290 | Although this enzyme is predicted to encode a strictosidine synthase (SS), it lacks a conserved catalytic glutamate residue found in active SS enzymes and it is not expected to have SS activity.                                                                                                                                                                           | 684.05  | 75.37   | 9.08  | 2.45E-05 | 5.65E-03 |
| 3689 | 6 | M2-3 vs. S2-3 | 244972_at<br>267607_s_a | ATCG00680 | encodes for CP47, subunit of the photosystem II reaction center.                                                                                                                                                                                                                                                                                                             | 148.49  | 16.45   | 9.03  | 4.15E-04 | 1.50E-02 |
| 3690 | 6 | M2-3 vs. S2-3 | t                       | AT2G26740 | Encodes a soluble epoxide hydrolase whose expression is induced by auxin and water stress.                                                                                                                                                                                                                                                                                   | 107.22  | 13.14   | 8.16  | 3.47E-04 | 1.42E-02 |
| 3691 | 6 | M2-3 vs. S2-3 | 256245_at               | AT3G12580 | heat shock protein 70;(source:Araport11) Encodes glutathione transferase belonging to the tau class of GSTs. Naming convention according to Wagner et al. (2002).                                                                                                                                                                                                            | 179.77  | 30.34   | 5.93  | 8.64E-04 | 1.98E-02 |
| 3692 | 6 | M2-3 vs. S2-3 | 260745_at               | AT1G78370 | member of a novel family of plant-specific GATA-type transcription factors.                                                                                                                                                                                                                                                                                                  | 106.89  | 18.08   | 5.91  | 7.41E-04 | 1.94E-02 |
| 3693 | 6 | M2-3 vs. S2-3 | 258041_at               | AT3G21175 | transmembrane protein;(source:Araport11)                                                                                                                                                                                                                                                                                                                                     | 102.67  | 20.28   | 5.06  | 3.40E-05 | 6.43E-03 |
| 3694 | 6 | M2-3 vs. S2-3 | 244920_s_a              | AT2G07674 | Calcium-dependent phosphotriesterase superfamily protein;(source:Araport11)                                                                                                                                                                                                                                                                                                  | 648.72  | 136.5   | 4.75  | 8.12E-04 | 1.97E-02 |
| 3695 | 6 | M2-3 vs. S2-3 | 251658_at               | AT3G57020 | Encodes a protein with pyridoxal phosphate synthase activity whose transcripts were detected mostly in roots and accumulate during senescence. The protein was found in very low abundance, which prevented a specific localisation.                                                                                                                                         | 78.98   | 17.69   | 4.47  | 8.62E-04 | 1.98E-02 |
| 3696 | 6 | M2-3 vs. S2-3 | 258336_at               | AT3G16050 |                                                                                                                                                                                                                                                                                                                                                                              | 665.09  | 155.09  | 4.29  | 9.96E-04 | 2.10E-02 |
| 3697 | 6 | M2-3 vs. S2-3 | 247033_at               | AT5G67250 | Encodes an SKP1 interacting partner (SKIP2).Encodes an F-box protein. Based on genetic analysis appears to be functionally redundant with VFB1,2, and 3. When expression of all 4 genes is reduced plants show defects in growth and reduced expression of auxin response genes.                                                                                             | 490.86  | 120.27  | 4.08  | 2.46E-04 | 1.35E-02 |

|      |   |               |           |           |                                                                                                                                                                                                                                                                                                                                                                                                                                                                                                                                      |         |        |      |          |          |
|------|---|---------------|-----------|-----------|--------------------------------------------------------------------------------------------------------------------------------------------------------------------------------------------------------------------------------------------------------------------------------------------------------------------------------------------------------------------------------------------------------------------------------------------------------------------------------------------------------------------------------------|---------|--------|------|----------|----------|
| 3698 | 6 | M2-3 vs. S2-3 | 247208_at | AT5G64870 | Belongs to the group of plant flotillins, which are plasma membrane proteins. Flot3 is found in membrane nanodomains.                                                                                                                                                                                                                                                                                                                                                                                                                | 846.39  | 214.23 | 3.95 | 1.73E-04 | 1.29E-02 |
| 3699 | 6 | M2-3 vs. S2-3 | 249242_at | AT5G42250 | Zinc-binding alcohol dehydrogenase family protein;(source:Araport11)<br>Encodes a glycolate oxidase that modulates reactive oxygen species-mediated signal transduction during nonhost resistance.                                                                                                                                                                                                                                                                                                                                   | 203.33  | 52.92  | 3.84 | 7.95E-05 | 1.02E-02 |
| 3700 | 6 | M2-3 vs. S2-3 | 254630_at | AT4G18360 | C2H2-like zinc finger protein;(source:Araport11)                                                                                                                                                                                                                                                                                                                                                                                                                                                                                     | 106.97  | 28.2   | 3.79 | 8.09E-04 | 1.97E-02 |
| 3701 | 6 | M2-3 vs. S2-3 | 262969_at | AT1G75710 | member of Cyclic nucleotide gated channel family                                                                                                                                                                                                                                                                                                                                                                                                                                                                                     | 864.8   | 230.02 | 3.76 | 8.56E-04 | 1.98E-02 |
| 3702 | 6 | M2-3 vs. S2-3 | 248250_at | AT5G53130 | Putative flavin monooxygenase.                                                                                                                                                                                                                                                                                                                                                                                                                                                                                                       | 213.78  | 57.19  | 3.74 | 7.91E-05 | 1.02E-02 |
| 3703 | 6 | M2-3 vs. S2-3 | 261023_at | AT1G12200 |                                                                                                                                                                                                                                                                                                                                                                                                                                                                                                                                      | 83.3    | 23.19  | 3.59 | 2.70E-04 | 1.37E-02 |
| 3704 | 6 | M2-3 vs. S2-3 | 248248_at | AT5G53120 | encodes a novel spermine synthase and is a paralog of previously characterized spermidine synthases, SPDS1 and SPDS2. SPDS3 forms heterodimers with SDPS2, which in turn forms heterodimers with SDPS1 in vivo. The gene does not complement speDelta3 deficiency of spermidine synthase in yeast but DOES complement speDelta4 deficiency.                                                                                                                                                                                          | 1354.21 | 405.03 | 3.34 | 8.40E-04 | 1.98E-02 |
| 3705 | 6 | M2-3 vs. S2-3 | 258321_at | AT3G22840 | Encodes an early light-inducible protein.                                                                                                                                                                                                                                                                                                                                                                                                                                                                                            | 89.76   | 26.88  | 3.34 | 9.66E-04 | 2.06E-02 |
| 3706 | 6 | M2-3 vs. S2-3 | 245993_at | AT5G20700 | senescence-associated family protein, putative (DUF581);(source:Araport11)                                                                                                                                                                                                                                                                                                                                                                                                                                                           | 172.17  | 55.33  | 3.11 | 4.60E-04 | 1.57E-02 |
| 3707 | 6 | M2-3 vs. S2-3 | 252004_at | AT3G52780 | Purple acid phosphatases superfamily protein;(source:Araport11)<br>Encodes a catalytically active cinnamyl alcohol dehydrogenase which uses p-coumaryl aldehyde as a preferred substrate. It can also use sinapyl, caffeyl, coniferyl and d-hydroxyconiferyl aldehydes as substrates.                                                                                                                                                                                                                                                | 37.47   | 12.1   | 3.1  | 1.61E-04 | 1.29E-02 |
| 3708 | 6 | M2-3 vs. S2-3 | 253277_at | AT4G34230 | Encodes a protein with ADP-ribose hydrolase activity. Negatively regulates EDS1-conditioned plant defense and programmed cell death.                                                                                                                                                                                                                                                                                                                                                                                                 | 193.74  | 62.53  | 3.1  | 7.37E-04 | 1.94E-02 |
| 3709 | 6 | M2-3 vs. S2-3 | 254784_at | AT4G12720 | electron carrier;(source:Araport11)                                                                                                                                                                                                                                                                                                                                                                                                                                                                                                  | 520.44  | 173.07 | 3.01 | 3.80E-04 | 1.48E-02 |
| 3710 | 6 | M2-3 vs. S2-3 | 244966_at | ATCG00590 | Aldolase superfamily protein;(source:Araport11)                                                                                                                                                                                                                                                                                                                                                                                                                                                                                      | 44.64   | 15.16  | 2.94 | 1.35E-04 | 1.22E-02 |
| 3711 | 6 | M2-3 vs. S2-3 | 260967_at | AT1G12230 | NAD(P)-binding Rossmann-fold superfamily protein;(source:Araport11)                                                                                                                                                                                                                                                                                                                                                                                                                                                                  | 297.05  | 103.3  | 2.88 | 9.04E-04 | 2.03E-02 |
| 3712 | 6 | M2-3 vs. S2-3 | 246017_at | AT5G10730 |                                                                                                                                                                                                                                                                                                                                                                                                                                                                                                                                      | 168.65  | 58.74  | 2.87 | 1.49E-04 | 1.26E-02 |
| 3713 | 6 | M2-3 vs. S2-3 | 265182_at | AT1G23740 | AOR is an alkenal/one oxidoreductase that acts on compounds with unsaturated alpha,beta-carbonyls. The activity of this enzyme with a number of substrates, including acrolein and 3-buten-2-one, was demonstrated in vitro using a truncated form of the protein that lacked approximately 80 of the first amino acids. This protein appears to localize to the chloroplast where it likely helps to maintain the photosynthetic process by detoxifying reactive carbonyls formed during lipid peroxidation.                        | 124.39  | 43.57  | 2.85 | 7.96E-04 | 1.97E-02 |
| 3714 | 6 | M2-3 vs. S2-3 | 249328_at | AT5G40820 | Encodes a Arabidopsis ortholog of the ATR protein kinase that is involved in a wide range of responses to DNA damage and plays a central role in cell-cycle regulation. Dominant loss of function alleles identified as suppressors of ALS also exhibit increased tolerance to aluminum. This may be due to the inhibition of terminal differentiation of the root apex upon exposure to Al. Pentatricopeptide Repeat Protein containing the DYW motif. Required for editing of multiple plastid transcripts. Endonuclease activity. | 198.63  | 71.05  | 2.8  | 1.47E-05 | 3.85E-03 |
| 3715 | 6 | M2-3 vs. S2-3 | 262509_at | AT1G11290 | membrane protein;(source:Araport11)                                                                                                                                                                                                                                                                                                                                                                                                                                                                                                  | 105.71  | 38.39  | 2.75 | 6.85E-04 | 1.92E-02 |
| 3716 | 6 | M2-3 vs. S2-3 | 249701_at | AT5G35460 | signal recognition particle receptor alpha subunit family protein;(source:Araport11)                                                                                                                                                                                                                                                                                                                                                                                                                                                 | 260.97  | 95.34  | 2.74 | 9.14E-04 | 2.03E-02 |
| 3717 | 6 | M2-3 vs. S2-3 | 253625_at | AT4G30600 | plastid transcriptionally active 5;(source:Araport11)                                                                                                                                                                                                                                                                                                                                                                                                                                                                                | 983.05  | 362.1  | 2.71 | 2.17E-04 | 1.34E-02 |
| 3718 | 6 | M2-3 vs. S2-3 | 254727_at | AT4G13670 | RAB GTPase homolog A2C;(source:Araport11)                                                                                                                                                                                                                                                                                                                                                                                                                                                                                            | 128.97  | 47.86  | 2.69 | 6.39E-05 | 8.70E-03 |
| 3719 | 6 | M2-3 vs. S2-3 | 252472_at | AT3G46830 | AT hook motif-containing protein;(source:Araport11)                                                                                                                                                                                                                                                                                                                                                                                                                                                                                  | 199.37  | 75.93  | 2.63 | 8.13E-05 | 1.02E-02 |
| 3720 | 6 | M2-3 vs. S2-3 | 248148_at | AT5G54930 | autophagy-related (ATG) gene                                                                                                                                                                                                                                                                                                                                                                                                                                                                                                         | 75.43   | 29.01  | 2.6  | 4.70E-04 | 1.57E-02 |
| 3721 | 6 | M2-3 vs. S2-3 | 248543_at | AT5G50230 | basic helix-loop-helix (bHLH) DNA-binding superfamily protein;(source:Araport11)                                                                                                                                                                                                                                                                                                                                                                                                                                                     | 118.82  | 45.67  | 2.6  | 7.59E-04 | 1.97E-02 |
| 3722 | 6 | M2-3 vs. S2-3 | 255497_at | AT4G02590 | anti-muellerian hormone type-2 receptor;(source:Araport11)                                                                                                                                                                                                                                                                                                                                                                                                                                                                           | 111.33  | 42.99  | 2.59 | 4.56E-04 | 1.57E-02 |
| 3723 | 6 | M2-3 vs. S2-3 | 252181_at | AT3G50685 | Protein kinase superfamily protein;(source:Araport11)                                                                                                                                                                                                                                                                                                                                                                                                                                                                                | 346.54  | 136.88 | 2.53 | 2.77E-04 | 1.37E-02 |
| 3724 | 6 | M2-3 vs. S2-3 | 267561_at | AT2G45590 |                                                                                                                                                                                                                                                                                                                                                                                                                                                                                                                                      | 356.45  | 141.75 | 2.51 | 8.47E-05 | 1.02E-02 |
| 3725 | 6 | M2-3 vs. S2-3 | 261685_at | AT1G47290 | Encodes an enzyme with 3&#946;-hydroxysteroid dehydrogenase/C4-decarboxylase activity <i>in vitro</i>. The activity of the enzyme was determined using microsomal extracts of yeast overexpressing the <i>Arabidopsis</i> gene. Cytosolic fractions failed to be associated to the activity, leading to the speculation that the enzyme is membrane-bound.                                                                                                                                                                           | 150.94  | 62.02  | 2.43 | 9.48E-04 | 2.05E-02 |
| 3726 | 6 | M2-3 vs. S2-3 | 263954_at | AT2G35840 | Sucrose-6F-phosphate phosphohydrolase family protein;(source:Araport11)                                                                                                                                                                                                                                                                                                                                                                                                                                                              | 197.61  | 81.95  | 2.41 | 5.41E-05 | 7.94E-03 |
| 3727 | 6 | M2-3 vs. S2-3 | 245929_at | AT5G24760 | GroES-like zinc-binding dehydrogenase family protein;(source:Araport11)                                                                                                                                                                                                                                                                                                                                                                                                                                                              | 190.29  | 78.93  | 2.41 | 4.86E-04 | 1.59E-02 |
| 3728 | 6 | M2-3 vs. S2-3 | 264243_at | AT1G54650 | Methyltransferase family protein;(source:Araport11)                                                                                                                                                                                                                                                                                                                                                                                                                                                                                  | 152.02  | 63.11  | 2.41 | 8.38E-04 | 1.98E-02 |
| 3729 | 6 | M2-3 vs. S2-3 | 260530_at | AT2G47320 | Cyclophilin-like peptidyl-prolyl cis-trans isomerase family protein;(source:Araport11)                                                                                                                                                                                                                                                                                                                                                                                                                                               | 498.53  | 208.33 | 2.39 | 7.00E-07 | 1.25E-03 |

|      |   |               |                 |           |                                                                                                                                                                                                                                                                                                                                                                                                                                                                                                                                                                                            |        |        |      |          |          |
|------|---|---------------|-----------------|-----------|--------------------------------------------------------------------------------------------------------------------------------------------------------------------------------------------------------------------------------------------------------------------------------------------------------------------------------------------------------------------------------------------------------------------------------------------------------------------------------------------------------------------------------------------------------------------------------------------|--------|--------|------|----------|----------|
| 3730 | 6 | M2-3 vs. S2-3 | 259669_at       | AT1G52340 | Encodes a cytosolic short-chain dehydrogenase/reductase involved in the conversion of xanthoxin to ABA-aldehyde during ABA biosynthesis. Mutants are insensitive to sucrose and glucose.                                                                                                                                                                                                                                                                                                                                                                                                   | 67.95  | 29     | 2.34 | 2.54E-04 | 1.37E-02 |
| 3731 | 6 | M2-3 vs. S2-3 | 247260_at       | AT5G64500 | Major facilitator superfamily protein;(source:Araport11)                                                                                                                                                                                                                                                                                                                                                                                                                                                                                                                                   | 306.77 | 131.86 | 2.33 | 7.62E-04 | 1.97E-02 |
| 3732 | 6 | M2-3 vs. S2-3 | 258044_at       | AT3G21270 | Encodes Dof zinc finger protein adof2.                                                                                                                                                                                                                                                                                                                                                                                                                                                                                                                                                     | 114.34 | 50.11  | 2.28 | 7.41E-04 | 1.94E-02 |
| 3733 | 6 | M2-3 vs. S2-3 | 262355_at       | AT1G72820 | Mitochondrial substrate carrier family protein;(source:Araport11)                                                                                                                                                                                                                                                                                                                                                                                                                                                                                                                          | 255.11 | 112.08 | 2.28 | 8.73E-04 | 1.98E-02 |
| 3734 | 6 | M2-3 vs. S2-3 | 245066_at       | AT2G39840 | Encodes the catalytic subunit of a Type 1 phosphoprotein Ser/Thr phosphatase, expressed in roots, shoots and flowers. The mRNA is cell-to-cell mobile.                                                                                                                                                                                                                                                                                                                                                                                                                                     | 352.87 | 155.05 | 2.28 | 9.13E-04 | 2.03E-02 |
| 3735 | 6 | M2-3 vs. S2-3 | 265763_at       | AT2G48060 | piezo-type mechanosensitive ion channel component;(source:Araport11)                                                                                                                                                                                                                                                                                                                                                                                                                                                                                                                       | 260.55 | 114.59 | 2.27 | 1.70E-06 | 1.40E-03 |
| 3736 | 6 | M2-3 vs. S2-3 | 255303_at       | AT4G04860 | DERLIN-2.2;(source:Araport11)                                                                                                                                                                                                                                                                                                                                                                                                                                                                                                                                                              | 294.31 | 130.91 | 2.25 | 6.95E-04 | 1.94E-02 |
| 3737 | 6 | M2-3 vs. S2-3 | 251616_at       | AT3G57990 | Encodes a ?-barrel protein, named OEP40, locates in in the outer envelope of chloroplasts, and functions as a solute channel which is selectively permeable for glucose.                                                                                                                                                                                                                                                                                                                                                                                                                   | 93.29  | 41.81  | 2.23 | 2.30E-04 | 1.34E-02 |
| 3738 | 6 | M2-3 vs. S2-3 | 253839_at       | AT4G27890 | HSP20-like chaperones superfamily protein;(source:Araport11)                                                                                                                                                                                                                                                                                                                                                                                                                                                                                                                               | 43.43  | 19.49  | 2.23 | 3.30E-04 | 1.42E-02 |
| 3739 | 6 | M2-3 vs. S2-3 | 247894_at       | AT5G58003 | Encodes a polypeptide that contains FCPH and BRCT domains. RNAi suppression mutant lines were generated, which displayed a range of phenotypic abnormalities, including: incomplete to no cotyledon expansion, slow growth, epinastic leaves or small inflorescences.                                                                                                                                                                                                                                                                                                                      | 96.32  | 44.53  | 2.16 | 8.49E-04 | 1.98E-02 |
| 3740 | 6 | M2-3 vs. S2-3 | 267012_at       | AT2G39220 | PATATIN-like protein 6;(source:Araport11)                                                                                                                                                                                                                                                                                                                                                                                                                                                                                                                                                  | 408.38 | 190.71 | 2.14 | 3.01E-04 | 1.41E-02 |
| 3741 | 6 | M2-3 vs. S2-3 | 261065_at       | AT1G07500 | SMR5 is a member of the SIAMESE-RELATED Cyclin-Dependent Kinase Inhibitor family. It is induced by ROS/oxidative stress.                                                                                                                                                                                                                                                                                                                                                                                                                                                                   | 28.97  | 13.68  | 2.12 | 5.33E-05 | 7.94E-03 |
| 3742 | 6 | M2-3 vs. S2-3 | 265413_s_a<br>t | AT2G16650 | Encodes a proteinaceous RNase P that supports RNase P activity in vivo in both organelles and the nucleus. It is also involved in the maturation of small nucleolar RNA (snoRNA) and mRNA.                                                                                                                                                                                                                                                                                                                                                                                                 | 28.23  | 13.3   | 2.12 | 2.16E-04 | 1.34E-02 |
| 3743 | 6 | M2-3 vs. S2-3 | 253477_at       | AT4G32320 | Encodes a cytosolic ascorbate peroxidase APX6. Ascorbate peroxidases are enzymes that scavenge hydrogen peroxide in plant cells. Eight types of APX have been described for Arabidopsis: three cytosolic (APX1, APX2, APX6), two chloroplastic types (stromal sAPX, thylakoid tAPX), and three microsomal (APX3, APX4, APX5) isoforms.                                                                                                                                                                                                                                                     | 69.47  | 33.36  | 2.08 | 1.19E-04 | 1.16E-02 |
| 3744 | 6 | M2-3 vs. S2-3 | 247040_at       | AT5G67150 | HXXXD-type acyl-transferase family protein;(source:Araport11)                                                                                                                                                                                                                                                                                                                                                                                                                                                                                                                              | 31.76  | 15.54  | 2.04 | 3.00E-04 | 1.41E-02 |
| 3745 | 6 | M2-3 vs. S2-3 | 246038_s_a      | AT5G19460 | nudix hydrolase homolog 20;(source:Araport11)                                                                                                                                                                                                                                                                                                                                                                                                                                                                                                                                              | 107.88 | 55.95  | 1.93 | 3.17E-04 | 1.42E-02 |
| 3746 | 6 | M2-3 vs. S2-3 | 250889_at       | AT5G04500 | Encodes a member of the CAZy Glycosyltransferase Family 64 that is involved in glycosylinositolphosphorylceramide and sphingolipid glycosylation. In mutants, seed germination was less sensitive to salt stress than in wild-type plants. [The protein was expected to be Golgi-localized based on function as well as the Golgi localization of its homolog GMT1. However, GFP-fusion proteins localized both to the ER and Golgi, and especially to ER when co-expressed with Golgi markers. Therefore, localization cannot confidently be defined. (pers. communication, J. Mortimer)] | 72.55  | 37.64  | 1.93 | 3.44E-04 | 1.42E-02 |
| 3747 | 6 | M2-3 vs. S2-3 | 262950_at       | AT1G75510 | Transcription initiation factor IIF, beta subunit;(source:Araport11)                                                                                                                                                                                                                                                                                                                                                                                                                                                                                                                       | 91.9   | 48.3   | 1.9  | 1.31E-04 | 1.22E-02 |
| 3748 | 6 | M2-3 vs. S2-3 | 255364_s_a<br>t | AT4G04020 | Fibrillin precursor protein. The fibrillin preprotein, but not the mature protein interacts with ABI2. Regulated by abscisic acid response regulators. Involved in abscisic acid-mediated photoprotection. The mRNA is cell-to-cell mobile.                                                                                                                                                                                                                                                                                                                                                | 19.93  | 10.61  | 1.88 | 3.67E-04 | 1.47E-02 |
| 3749 | 6 | M2-3 vs. S2-3 | 254035_at       | AT4G25970 | Encodes the major form of the two non-mitochondrial phosphatidylserine decarboxylase. Located at the ER. The mRNA is cell-to-cell mobile.                                                                                                                                                                                                                                                                                                                                                                                                                                                  | 281.08 | 149.8  | 1.88 | 8.65E-04 | 1.98E-02 |
| 3750 | 6 | M2-3 vs. S2-3 | 261324_at       | AT1G44770 | elongation factor;(source:Araport11)                                                                                                                                                                                                                                                                                                                                                                                                                                                                                                                                                       | 565    | 310.12 | 1.82 | 2.40E-04 | 1.35E-02 |
| 3751 | 6 | M2-3 vs. S2-3 | 250130_at       | AT5G16510 | RGP5 is a member of the reversably-glycosylated family of proteins. Analyses using tagged RGP5 suggest that it is present in the cytosol and in association with the Golgi apparatus. Recombinant RGP5 does not have UDP-arabinose mutase activity based on an in vitro assay even though the related RGP1, RGP2, and RGP3 proteins do have activity in the same assay. RGP5 can form complexes with RGP1 and RGP2.                                                                                                                                                                        | 197.74 | 109.73 | 1.8  | 1.54E-04 | 1.29E-02 |

|      |   |               |            |           |                                                                                                                                                                                                                                                                                                                                                                                                                                                                                                               |        |        |      |          |          |
|------|---|---------------|------------|-----------|---------------------------------------------------------------------------------------------------------------------------------------------------------------------------------------------------------------------------------------------------------------------------------------------------------------------------------------------------------------------------------------------------------------------------------------------------------------------------------------------------------------|--------|--------|------|----------|----------|
| 3752 | 6 | M2-3 vs. S2-3 | 263241_at  | AT2G16500 | Encodes a arginine decarboxylase (ADC), a rate-limiting enzyme that catalyzes the first step of polyamine (PA) biosynthesis via ADC pathway in Arabidopsis thaliana. Arabidopsis genome has two ADC paralogs, ADC1 and ADC2. Double mutant analysis showed that ADC genes are essential for the production of PA, and are required for normal seed development. Promoter region of ADC1 contains 742-bp AT-rich transposable element, called AtATE, that belongs to the MITE families of repetitive elements. | 43.65  | 24.71  | 1.77 | 4.54E-04 | 1.57E-02 |
| 3753 | 6 | M2-3 vs. S2-3 | 251881_at  | AT3G54250 | Encodes mevalonate diphosphate decarboxylase, the enzyme that catalyzes the synthesis of isopentenyl diphosphate, used in sterol and isoprenoid biosynthesis.                                                                                                                                                                                                                                                                                                                                                 | 304.44 | 175.95 | 1.73 | 2.00E-07 | 5.76E-04 |
| 3754 | 6 | M2-3 vs. S2-3 | 261579_at  | AT1G01050 | Encodes a soluble protein with inorganic pyrophosphatase activity that is highly specific for Mg-inorganic pyrophosphate.                                                                                                                                                                                                                                                                                                                                                                                     | 239.07 | 138.93 | 1.72 | 2.23E-04 | 1.34E-02 |
| 3755 | 6 | M2-3 vs. S2-3 | 254030_at  | AT4G25890 | 60S acidic ribosomal protein family;(source:Araport11)                                                                                                                                                                                                                                                                                                                                                                                                                                                        | 111.72 | 66.59  | 1.68 | 9.93E-04 | 2.10E-02 |
| 3756 | 6 | M2-3 vs. S2-3 | 249140_at  | AT5G43190 | Galactose oxidase/kelch repeat superfamily protein;(source:Araport11)                                                                                                                                                                                                                                                                                                                                                                                                                                         | 42     | 25.21  | 1.67 | 1.27E-05 | 3.66E-03 |
| 3757 | 6 | M2-3 vs. S2-3 | 265858_at  | AT2G01720 | Ribophorin I;(source:Araport11)                                                                                                                                                                                                                                                                                                                                                                                                                                                                               | 227.35 | 136.94 | 1.66 | 1.33E-04 | 1.22E-02 |
| 3758 | 6 | M2-3 vs. S2-3 | 260648_at  | AT1G08050 | Zinc finger (C3HC4-type RING finger) family protein;(source:Araport11)                                                                                                                                                                                                                                                                                                                                                                                                                                        | 40.79  | 24.57  | 1.66 | 8.07E-04 | 1.97E-02 |
| 3759 | 6 | M2-3 vs. S2-3 | 255994_at  | AT1G29760 | Membrane protein involved in lipid droplet biogenesis primarily in pollen.                                                                                                                                                                                                                                                                                                                                                                                                                                    | 100.53 | 60.78  | 1.65 | 4.08E-04 | 1.49E-02 |
| 3760 | 6 | M2-3 vs. S2-3 | 252394_at  | AT3G47940 | DNAJ heat shock family protein;(source:Araport11)                                                                                                                                                                                                                                                                                                                                                                                                                                                             | 41.32  | 25.25  | 1.64 | 2.51E-04 | 1.36E-02 |
| 3761 | 6 | M2-3 vs. S2-3 | 253216_at  | AT4G34960 | Cyclophilin-like peptidyl-prolyl cis-trans isomerase family protein;(source:Araport11)                                                                                                                                                                                                                                                                                                                                                                                                                        | 42.75  | 26.18  | 1.63 | 9.51E-04 | 2.05E-02 |
| 3762 | 6 | M2-3 vs. S2-3 | 254911_at  | AT4G11100 | gelsolin protein;(source:Araport11)                                                                                                                                                                                                                                                                                                                                                                                                                                                                           | 14.53  | 9.25   | 1.57 | 3.11E-04 | 1.41E-02 |
| 3763 | 6 | M2-3 vs. S2-3 | 256396_at  | AT3G06150 | cytochrome P450 family protein;(source:Araport11)                                                                                                                                                                                                                                                                                                                                                                                                                                                             | 41.4   | 26.43  | 1.57 | 8.09E-04 | 1.97E-02 |
| 3764 | 6 | M2-3 vs. S2-3 | 266930_at  | AT2G45930 | hypothetical protein;(source:Araport11)                                                                                                                                                                                                                                                                                                                                                                                                                                                                       | 24.67  | 16.41  | 1.5  | 1.94E-04 | 1.34E-02 |
| 3765 | 6 | M2-3 vs. S2-3 | 252230_at  | AT3G49810 | Encodes a protein with E3 ubiquitin ligase activity that is involved in negative regulation of salt stress tolerance during germination.                                                                                                                                                                                                                                                                                                                                                                      | 63.51  | 45.17  | 1.41 | 1.86E-04 | 1.33E-02 |
| 3766 | 6 | M2-3 vs. S2-3 | 261455_at  | AT1G21070 | Nucleotide-sugar transporter family protein;(source:Araport11)                                                                                                                                                                                                                                                                                                                                                                                                                                                | 19.84  | 16.49  | 1.2  | 2.23E-04 | 1.34E-02 |
| 3767 | 6 | M2-3 vs. S2-3 | 256381_at  | AT1G66850 | Bifunctional inhibitor/lipid-transfer protein/seed storage 2S albumin superfamily protein;(source:Araport11)                                                                                                                                                                                                                                                                                                                                                                                                  | 14.54  | 18.31  | 0.79 | < 1e-07  | < 1e-07  |
| 3768 | 6 | M2-3 vs. S2-3 | 264524_at  | AT1G10070 | Encodes a chloroplast branched-chain amino acid aminotransferase. Complements the yeast leu/iso-leu/val auxotrophy mutant. Involved in cell wall development.                                                                                                                                                                                                                                                                                                                                                 | 20.84  | 29.73  | 0.7  | 5.90E-04 | 1.75E-02 |
| 3769 | 6 | M2-3 vs. S2-3 | 258098_at  | AT3G23670 | Microtubule motor kinesin PAKRP1L/Kinesin-12B. Together with PAKRP1/Kinesin-12A, serve as linkers of the plus ends of antiparallel microtubules in the phragmoplast.                                                                                                                                                                                                                                                                                                                                          | 16.82  | 26.46  | 0.64 | 8.68E-04 | 1.98E-02 |
| 3770 | 6 | M2-3 vs. S2-3 | 254562_at  | AT4G19230 | Encodes a protein with ABA 8'-hydroxylase activity, involved in ABA catabolism. Member of the CYP707A gene family. CYP707A1 appears to play an important role in determining the ABA levels in dry seeds. Gene involved in postgermination growth. Overexpression of CYP707A1 leads to a decrease in ABA levels and a reduction in after-ripening period to break dormancy.                                                                                                                                   | 16.12  | 25.67  | 0.63 | 7.40E-04 | 1.94E-02 |
| 3771 | 6 | M2-3 vs. S2-3 | 260625_at  | AT1G08060 | Encodes a transcriptional silencer that is required for proper expression of PRR/NLR immune receptor genes.                                                                                                                                                                                                                                                                                                                                                                                                   | 34.6   | 55.23  | 0.63 | 9.55E-04 | 2.05E-02 |
| 3772 | 6 | M2-3 vs. S2-3 | 245573_at  | AT4G14730 | Stress induced membrane protein. Mutants show enhanced cell death under stress.                                                                                                                                                                                                                                                                                                                                                                                                                               | 22.4   | 36.09  | 0.62 | 4.93E-04 | 1.61E-02 |
| 3773 | 6 | M2-3 vs. S2-3 | 254446_at  | AT4G20890 | tubulin 9 The mRNA is cell-to-cell mobile. The SPR1 gene encodes a plant-specific 12-kD protein which has a repeated motif at both ends, separated by a predicted rod-like domain, suggesting that it may act as an intermolecular linker. Ubiquitously expressed and belongs to a six-member gene family in Arabidopsis; expressed in transgenic seedlings localized to microtubules within the cortical array, preprophase band, phragmoplast, and mitotic spindle.                                         | 73.82  | 119    | 0.62 | 6.45E-04 | 1.83E-02 |
| 3774 | 6 | M2-3 vs. S2-3 | 264028_at  | AT2G03680 | RING/U-box superfamily protein;(source:Araport11)                                                                                                                                                                                                                                                                                                                                                                                                                                                             | 61.1   | 100.91 | 0.61 | 1.21E-05 | 3.66E-03 |
| 3775 | 6 | M2-3 vs. S2-3 | 254855_s_a | AT4G12140 | Arabidopsis Dof protein containing a single 51-amino acid zinc finger DNA-binding domain, which may play an important roles in plant growth and development.                                                                                                                                                                                                                                                                                                                                                  | 9.02   | 14.75  | 0.61 | 1.70E-04 | 1.29E-02 |
| 3776 | 6 | M2-3 vs. S2-3 | 252210_at  | AT3G50410 | Homeobox-leucine zipper protein.                                                                                                                                                                                                                                                                                                                                                                                                                                                                              | 25.5   | 41.91  | 0.61 | 3.52E-04 | 1.42E-02 |
| 3777 | 6 | M2-3 vs. S2-3 | 250694_at  | AT5G06710 | RING/U-box superfamily protein;(source:Araport11)                                                                                                                                                                                                                                                                                                                                                                                                                                                             | 12.39  | 20.21  | 0.61 | 7.77E-04 | 1.97E-02 |
| 3778 | 6 | M2-3 vs. S2-3 | 257826_at  | AT3G26730 | VQ motif-containing protein;(source:Araport11)                                                                                                                                                                                                                                                                                                                                                                                                                                                                | 97.88  | 163.17 | 0.6  | 9.46E-04 | 2.05E-02 |
| 3779 | 6 | M2-3 vs. S2-3 | 248868_at  | AT5G46780 | magnesium transporter NIPA (DUF803);(source:Araport11)                                                                                                                                                                                                                                                                                                                                                                                                                                                        | 13.05  | 22.57  | 0.58 | 5.41E-04 | 1.70E-02 |
| 3780 | 6 | M2-3 vs. S2-3 | 254683_at  | AT4G13800 | Encodes the PsbQ subunit of the oxygen evolving complex of photosystem II.                                                                                                                                                                                                                                                                                                                                                                                                                                    | 12.14  | 20.84  | 0.58 | 8.07E-04 | 1.97E-02 |
| 3781 | 6 | M2-3 vs. S2-3 | 254398_at  | AT4G21280 | Encodes a novel ring finger protein and forms an N-terminal hydrophobic domain and a C-terminal RING-H2 signature. Expression is down regulated by brassinolide.                                                                                                                                                                                                                                                                                                                                              | 126.17 | 221.46 | 0.57 | 7.20E-06 | 2.81E-03 |
| 3782 | 6 | M2-3 vs. S2-3 | 251321_at  | AT3G61460 |                                                                                                                                                                                                                                                                                                                                                                                                                                                                                                               | 40.6   | 71.62  | 0.57 | 2.34E-04 | 1.35E-02 |

|      |   |               |            |           |                                                                                                                                                                                                                                                                                                                                                                                                                                                                                                                                                                                                                                                                                                 |        |         |      |          |          |
|------|---|---------------|------------|-----------|-------------------------------------------------------------------------------------------------------------------------------------------------------------------------------------------------------------------------------------------------------------------------------------------------------------------------------------------------------------------------------------------------------------------------------------------------------------------------------------------------------------------------------------------------------------------------------------------------------------------------------------------------------------------------------------------------|--------|---------|------|----------|----------|
| 3783 | 6 | M2-3 vs. S2-3 | 246900_at  | AT5G25620 | Encodes a member of a family of flavin monooxygenases with an important role in auxin biosynthesis. YUC6 possesses an additional thiol-reductase activity that confers drought resistance independently of auxin biosynthesis.                                                                                                                                                                                                                                                                                                                                                                                                                                                                  | 15.21  | 26.71   | 0.57 | 7.16E-04 | 1.94E-02 |
| 3784 | 6 | M2-3 vs. S2-3 | 262911_s_a | AT1G07400 | HSP20-like chaperones superfamily protein;(source:Araport11)                                                                                                                                                                                                                                                                                                                                                                                                                                                                                                                                                                                                                                    | 8.32   | 14.98   | 0.56 | 2.78E-04 | 1.37E-02 |
| 3785 | 6 | M2-3 vs. S2-3 | 266735_at  | AT2G46930 | Encodes a pectin acetyltransferase that removes cell wall acetate associated with pectin formation in Arabidopsis leaves.                                                                                                                                                                                                                                                                                                                                                                                                                                                                                                                                                                       | 16.55  | 29.88   | 0.55 | 3.09E-04 | 1.41E-02 |
| 3786 | 6 | M2-3 vs. S2-3 | 250439_at  | AT5G10450 | Encodes a member of the 14-3-3 gene family that is a lambda isoform (14-3-3&#955;). Interacts with APX3 (ascorbate peroxidase) and AKR2 , suggesting a role in mediating oxidative metabolism in stress response. This protein was shown to colocalize and interact with SERK1 by which it is phosphorylated. This protein is also reported to interact with the phosphorylated form of the BZR1 transcription factor involved in brassinosteroid signaling and may affect the nucleocytoplasmic shuttling of BZR1. Interacts with JAZ10.4 which lacks the Jas motif. It is also phosphorylated by CRPK1 as part of the response to cold and translocates to the nucleus after phosphorylation. | 334.27 | 602.41  | 0.55 | 8.51E-04 | 1.98E-02 |
| 3787 | 6 | M2-3 vs. S2-3 | 249750_at  | AT5G24570 | hypothetical protein;(source:Araport11)                                                                                                                                                                                                                                                                                                                                                                                                                                                                                                                                                                                                                                                         | 16.48  | 30.54   | 0.54 | 2.75E-04 | 1.37E-02 |
| 3788 | 6 | M2-3 vs. S2-3 | 254800_at  | AT4G13070 | RNA-binding CRS1 / YhbY (CRM) domain protein;(source:Araport11)                                                                                                                                                                                                                                                                                                                                                                                                                                                                                                                                                                                                                                 | 11.21  | 21.2    | 0.53 | 1.15E-04 | 1.16E-02 |
| 3789 | 6 | M2-3 vs. S2-3 | 267405_at  | AT2G33740 | encodes a copper binding protein that forms tetramers in vitro. Gene is expressed in all tissues examined and protein is localized to the chloroplast. The mRNA is cell-to-cell mobile.                                                                                                                                                                                                                                                                                                                                                                                                                                                                                                         | 104.09 | 196.52  | 0.53 | 2.83E-04 | 1.37E-02 |
| 3790 | 6 | M2-3 vs. S2-3 | 263477_at  | AT2G31790 | UDP-Glycosyltransferase superfamily protein;(source:Araport11)                                                                                                                                                                                                                                                                                                                                                                                                                                                                                                                                                                                                                                  | 58.56  | 109.8   | 0.53 | 3.73E-04 | 1.48E-02 |
| 3791 | 6 | M2-3 vs. S2-3 | 256491_at  | AT1G31500 | HESP identified based on similarity to nocturnins and presence circadian regulatory elements in the promoter. It functions as a Mg(II) dependent poly(A) exoribonuclease.It is under circadian regulation and expressed at night. Knockdowns affect the regulation of circadian genes CCA1 and TOC1. Ortholog of Peach WEEP gene containing a sterile alpha motif. In peach, WEEP is responsible for pendulous branching phenotype. However in Arabidopsis no morphological branching defect has been observed in mutant lines.                                                                                                                                                                 | 14.03  | 26.77   | 0.52 | 4.48E-04 | 1.57E-02 |
| 3792 | 6 | M2-3 vs. S2-3 | 259257_at  | AT3G07760 | ubiquitin-conjugating enzyme 28;(source:Araport11)                                                                                                                                                                                                                                                                                                                                                                                                                                                                                                                                                                                                                                              | 42.67  | 82.12   | 0.52 | 8.11E-04 | 1.97E-02 |
| 3793 | 6 | M2-3 vs. S2-3 | 262341_at  | AT1G64230 |                                                                                                                                                                                                                                                                                                                                                                                                                                                                                                                                                                                                                                                                                                 | 696.36 | 1368.53 | 0.51 | 9.87E-04 | 2.10E-02 |
| 3794 | 6 | M2-3 vs. S2-3 | 248587_at  | AT5G49550 | Putative homolog of mammalian BLOC-1 Subunit 2. Protein - protein interaction with BLOS1.                                                                                                                                                                                                                                                                                                                                                                                                                                                                                                                                                                                                       | 21.3   | 42.52   | 0.5  | 1.02E-04 | 1.09E-02 |
| 3795 | 6 | M2-3 vs. S2-3 | 266684_at  | AT2G19720 | ribosomal protein S15A B;(source:Araport11)                                                                                                                                                                                                                                                                                                                                                                                                                                                                                                                                                                                                                                                     | 42.09  | 84.9    | 0.5  | 3.86E-04 | 1.48E-02 |
| 3796 | 6 | M2-3 vs. S2-3 | 259181_at  | AT3G01690 | alpha/beta-Hydrolases superfamily protein;(source:Araport11)                                                                                                                                                                                                                                                                                                                                                                                                                                                                                                                                                                                                                                    | 163.87 | 327.18  | 0.5  | 6.47E-04 | 1.83E-02 |
| 3797 | 6 | M2-3 vs. S2-3 | 248139_at  | AT5G54970 | hypothetical protein;(source:Araport11)                                                                                                                                                                                                                                                                                                                                                                                                                                                                                                                                                                                                                                                         | 13.94  | 28.64   | 0.49 | 1.71E-04 | 1.29E-02 |
| 3798 | 6 | M2-3 vs. S2-3 | 255285_at  | AT4G04630 | senescence regulator (Protein of unknown function, DUF584);(source:Araport11)                                                                                                                                                                                                                                                                                                                                                                                                                                                                                                                                                                                                                   | 11.64  | 23.64   | 0.49 | 3.52E-04 | 1.42E-02 |
| 3799 | 6 | M2-3 vs. S2-3 | 265034_at  | AT1G61660 | Encodes a transcriptional activator that regulates the expression of genes by binding to their GCG- or E-boxes to mediate physiological responses, including proline biosynthesis and ROS scavenging pathways, to enhance stress tolerance.                                                                                                                                                                                                                                                                                                                                                                                                                                                     | 19.73  | 40.59   | 0.49 | 9.35E-04 | 2.04E-02 |
| 3800 | 6 | M2-3 vs. S2-3 | 257232_at  | AT3G16500 | phytochrome-associated protein 1 (PAP1)                                                                                                                                                                                                                                                                                                                                                                                                                                                                                                                                                                                                                                                         | 14.66  | 30.41   | 0.48 | 1.45E-04 | 1.26E-02 |
| 3801 | 6 | M2-3 vs. S2-3 | 260385_at  | AT1G74090 | encodes a desulfoglucosinolate sulfotransferase, involved in the final step of glucosinolate core structure biosynthesis. Has a broad-substrate specificity with preference with methionine-derived desulfoglucosinolates.                                                                                                                                                                                                                                                                                                                                                                                                                                                                      | 30.3   | 62.88   | 0.48 | 5.42E-04 | 1.70E-02 |
| 3802 | 6 | M2-3 vs. S2-3 | 260718_at  | AT1G48110 | evolutionarily conserved C-terminal region 7;(source:Araport11)                                                                                                                                                                                                                                                                                                                                                                                                                                                                                                                                                                                                                                 | 89.42  | 186.66  | 0.48 | 7.71E-04 | 1.97E-02 |
| 3803 | 6 | M2-3 vs. S2-3 | 261352_at  | AT1G79650 | Encodes a member of the RADIATION SENSITIVE23 (RAD23) family: AT1G16190(RAD23A), AT1G79650(RAD23B), AT3G02540(RAD23C), AT5G38470(RAD23D). RAD23 proteins play an essential role in the cell cycle, morphology, and fertility of plants through their delivery of UPS (ubiquitin/26S proteasome system) substrates to the 26S proteasome.                                                                                                                                                                                                                                                                                                                                                        | 21.97  | 46.36   | 0.47 | 2.44E-04 | 1.35E-02 |
| 3804 | 6 | M2-3 vs. S2-3 | 246730_at  | AT5G28060 | Ribosomal protein S24e family protein;(source:Araport11)                                                                                                                                                                                                                                                                                                                                                                                                                                                                                                                                                                                                                                        | 28.51  | 61.31   | 0.47 | 3.18E-04 | 1.42E-02 |
| 3805 | 6 | M2-3 vs. S2-3 | 253038_at  | AT4G37790 | Encodes homeobox protein HAT22, member of the HD-Zip II family. The mRNA is cell-to-cell mobile.                                                                                                                                                                                                                                                                                                                                                                                                                                                                                                                                                                                                | 15.13  | 32.47   | 0.47 | 5.95E-04 | 1.75E-02 |
| 3806 | 6 | M2-3 vs. S2-3 | 254111_at  | AT4G24890 | purple acid phosphatase 24;(source:Araport11)                                                                                                                                                                                                                                                                                                                                                                                                                                                                                                                                                                                                                                                   | 31.88  | 68.87   | 0.46 | 9.64E-05 | 1.07E-02 |
| 3807 | 6 | M2-3 vs. S2-3 | 247427_at  | AT5G62580 | ARM repeat superfamily protein;(source:Araport11)                                                                                                                                                                                                                                                                                                                                                                                                                                                                                                                                                                                                                                               | 30     | 65.35   | 0.46 | 1.47E-04 | 1.26E-02 |
| 3808 | 6 | M2-3 vs. S2-3 | 252931_at  | AT4G38930 | Ubiquitin fusion degradation UFD1 family protein;(source:Araport11)                                                                                                                                                                                                                                                                                                                                                                                                                                                                                                                                                                                                                             | 11.84  | 25.94   | 0.46 | 1.66E-04 | 1.29E-02 |
| 3809 | 6 | M2-3 vs. S2-3 | 255675_at  | AT4G00480 | MYC-related protein with a basic helix-loop-helix motif at the C-terminus and a region similar to the maize B/R family at the N-terminus                                                                                                                                                                                                                                                                                                                                                                                                                                                                                                                                                        | 10     | 21.66   | 0.46 | 1.99E-04 | 1.34E-02 |
| 3810 | 6 | M2-3 vs. S2-3 | 257115_at  | AT3G20150 | Kinesin motor family protein;(source:Araport11)                                                                                                                                                                                                                                                                                                                                                                                                                                                                                                                                                                                                                                                 | 11.33  | 24.64   | 0.46 | 2.19E-04 | 1.34E-02 |

|                                                                                                                                                                                                                                                                                                                                                                                                                                                             |   |               |                         |           |                                                                                                                                                                                                                                                                                                                                                                                                     |        |         |      |          |          |
|-------------------------------------------------------------------------------------------------------------------------------------------------------------------------------------------------------------------------------------------------------------------------------------------------------------------------------------------------------------------------------------------------------------------------------------------------------------|---|---------------|-------------------------|-----------|-----------------------------------------------------------------------------------------------------------------------------------------------------------------------------------------------------------------------------------------------------------------------------------------------------------------------------------------------------------------------------------------------------|--------|---------|------|----------|----------|
| 3811                                                                                                                                                                                                                                                                                                                                                                                                                                                        | 6 | M2-3 vs. S2-3 | 253964_at               | AT4G26480 | RNA-binding KH domain-containing protein;(source:Araport11)                                                                                                                                                                                                                                                                                                                                         | 58.22  | 127.45  | 0.46 | 5.78E-04 | 1.75E-02 |
| 3812                                                                                                                                                                                                                                                                                                                                                                                                                                                        | 6 | M2-3 vs. S2-3 | 258151_at               | AT3G18080 | B-S glucosidase 44;(source:Araport11)                                                                                                                                                                                                                                                                                                                                                               | 13.67  | 29.88   | 0.46 | 6.17E-04 | 1.78E-02 |
| 3813                                                                                                                                                                                                                                                                                                                                                                                                                                                        | 6 | M2-3 vs. S2-3 | 253420_at               | AT4G32260 | ATPase, F0 complex, subunit B/B, bacterial/chloroplast;(source:Araport11)                                                                                                                                                                                                                                                                                                                           | 193.13 | 425.45  | 0.45 | 3.64E-05 | 6.43E-03 |
| 3814                                                                                                                                                                                                                                                                                                                                                                                                                                                        | 6 | M2-3 vs. S2-3 | 259617_at               | AT1G47970 | nucleolin;(source:Araport11)                                                                                                                                                                                                                                                                                                                                                                        | 103.45 | 231.29  | 0.45 | 2.96E-04 | 1.41E-02 |
| This locus is annotated as a protein-coding gene in TAIR10. Based on communication with Jean-Luc GALLOIS (April 2013), this gene is split into two UBX domain-containing pseudogenes: one retains the original name: AT4G14250 (Chr4:8213237..8211984), one given a new locus identifier AT4G14245 (Chr4:8210231..8208985). Note that the Map Detail Image on the locus detail page and in GBrowse will not be updated until after the next genome release. |   |               |                         |           |                                                                                                                                                                                                                                                                                                                                                                                                     | 17.75  | 39.09   | 0.45 | 3.29E-04 | 1.42E-02 |
| 3815                                                                                                                                                                                                                                                                                                                                                                                                                                                        | 6 | M2-3 vs. S2-3 | 262100_s_at             | AT4G14250 |                                                                                                                                                                                                                                                                                                                                                                                                     |        |         |      |          |          |
| 3816                                                                                                                                                                                                                                                                                                                                                                                                                                                        | 6 | M2-3 vs. S2-3 | 258038_at               | AT3G21260 | Glycolipid transfer protein (GLTP) family protein;(source:Araport11)                                                                                                                                                                                                                                                                                                                                | 11.82  | 26.39   | 0.45 | 4.29E-04 | 1.54E-02 |
| 3817                                                                                                                                                                                                                                                                                                                                                                                                                                                        | 6 | M2-3 vs. S2-3 | 266636_at               | AT2G35370 | Encodes glycine decarboxylase complex H protein. Involved in photorespiration. The mRNA is cell-to-cell mobile.                                                                                                                                                                                                                                                                                     | 21.97  | 49.82   | 0.44 | 1.08E-04 | 1.11E-02 |
| 3818                                                                                                                                                                                                                                                                                                                                                                                                                                                        | 6 | M2-3 vs. S2-3 | 261593_at               | AT1G33170 | S-adenosyl-L-methionine-dependent methyltransferases superfamily protein;(source:Araport11)                                                                                                                                                                                                                                                                                                         | 26.58  | 60.64   | 0.44 | 5.19E-04 | 1.67E-02 |
| 3819                                                                                                                                                                                                                                                                                                                                                                                                                                                        | 6 | M2-3 vs. S2-3 | 264579_at               | AT1G05205 | hexokinase-1 protein;(source:Araport11)                                                                                                                                                                                                                                                                                                                                                             | 20.02  | 46.06   | 0.43 | 6.49E-05 | 8.70E-03 |
| 3820                                                                                                                                                                                                                                                                                                                                                                                                                                                        | 6 | M2-3 vs. S2-3 | 253977_at               | AT4G26630 | Encodes a chromatin-associated protein that specifically binds histones H3 and H4 and contributes to modulation of Arabidopsis chromatin structure and function.                                                                                                                                                                                                                                    | 27.81  | 65.03   | 0.43 | 3.22E-04 | 1.42E-02 |
| 3821                                                                                                                                                                                                                                                                                                                                                                                                                                                        | 6 | M2-3 vs. S2-3 | 266481_at               | AT2G31070 | TCP family protein involved in heterochronic regulation of leaf differentiation.                                                                                                                                                                                                                                                                                                                    | 28.38  | 66.37   | 0.43 | 4.79E-04 | 1.58E-02 |
| 3822                                                                                                                                                                                                                                                                                                                                                                                                                                                        | 6 | M2-3 vs. S2-3 | 249613_at               | AT5G37380 | Chaperone DnaJ-domain superfamily protein;(source:Araport11)                                                                                                                                                                                                                                                                                                                                        | 29.26  | 68.81   | 0.43 | 5.78E-04 | 1.75E-02 |
| 3823                                                                                                                                                                                                                                                                                                                                                                                                                                                        | 6 | M2-3 vs. S2-3 | 251707_at               | AT3G56490 | Encodes a protein that has adenylylsulfate sulfohydrolase activity (E.C. 3.6.2.1) in vitro.                                                                                                                                                                                                                                                                                                         | 453.14 | 1063.56 | 0.43 | 7.93E-04 | 1.97E-02 |
| 3824                                                                                                                                                                                                                                                                                                                                                                                                                                                        | 6 | M2-3 vs. S2-3 | 256062_at               | AT1G07090 | LIGHT-DEPENDENT SHORT HYPOCOTYLS-like protein (DUF640);(source:Araport11)                                                                                                                                                                                                                                                                                                                           | 14.13  | 33.23   | 0.43 | 7.98E-04 | 1.97E-02 |
| 3825                                                                                                                                                                                                                                                                                                                                                                                                                                                        | 6 | M2-3 vs. S2-3 | 264872_at               | AT1G24260 | Member of the MADs box transcription factor family. SEP3 is redundant with SEP1 and 2. Flowers of SEP1/2/3 triple mutants show a conversion of petals and stamens to sepals.SEP3 forms heterotetrameric complexes with other MADS box family members and binds to the CArG box motif.                                                                                                               | 274.89 | 656.26  | 0.42 | 1.73E-04 | 1.29E-02 |
| 3826                                                                                                                                                                                                                                                                                                                                                                                                                                                        | 6 | M2-3 vs. S2-3 | AFFX-Athal-Actin_5_r_at | AT5G09810 | Member of Actin gene family.Mutants are defective in germination and root growth. The mRNA is cell-to-cell mobile.                                                                                                                                                                                                                                                                                  | 31.23  | 74.39   | 0.42 | 2.18E-04 | 1.34E-02 |
| 3827                                                                                                                                                                                                                                                                                                                                                                                                                                                        | 6 | M2-3 vs. S2-3 | 254328_at               | AT4G22570 | Encodes an adenine phosphoribosyltransferase (APT; EC 2.4.2.7), which is a constitutively expressed enzyme involved in the one-step salvage of adenine to AMP. APT3 has higher affinity for zeatin, isopentenyladenine and benzyladenine than APT1 but lower Vmax than APT1.                                                                                                                        | 85.22  | 205.21  | 0.42 | 2.21E-04 | 1.34E-02 |
| 3828                                                                                                                                                                                                                                                                                                                                                                                                                                                        | 6 | M2-3 vs. S2-3 | 262432_at               | AT1G47530 | MATE efflux family protein;(source:Araport11)                                                                                                                                                                                                                                                                                                                                                       | 26.24  | 62.32   | 0.42 | 5.54E-04 | 1.70E-02 |
| 3829                                                                                                                                                                                                                                                                                                                                                                                                                                                        | 6 | M2-3 vs. S2-3 | 259971_at               | AT1G76580 | Squamosa promoter-binding protein-like (SBP domain) transcription factor family protein;(source:Araport11)                                                                                                                                                                                                                                                                                          | 77.81  | 184.47  | 0.42 | 5.95E-04 | 1.75E-02 |
| 3830                                                                                                                                                                                                                                                                                                                                                                                                                                                        | 6 | M2-3 vs. S2-3 | 247787_at               | AT5G58640 | Selenoprotein, Rdx type;(source:Araport11)                                                                                                                                                                                                                                                                                                                                                          | 91.42  | 215.14  | 0.42 | 6.00E-04 | 1.75E-02 |
| 3831                                                                                                                                                                                                                                                                                                                                                                                                                                                        | 6 | M2-3 vs. S2-3 | 251753_at               | AT3G55760 | hypothetical protein;(source:Araport11)                                                                                                                                                                                                                                                                                                                                                             | 39.56  | 94.03   | 0.42 | 7.79E-04 | 1.97E-02 |
| 3832                                                                                                                                                                                                                                                                                                                                                                                                                                                        | 6 | M2-3 vs. S2-3 | 248349_at               | AT5G52240 | Encodes a protein with similarity to progesterone-binding proteins in animals. Has been shown to bind steroids in vitro. Expressed in aerial portions of the plant excluding mature flowers and siliques. Antisense experiments suggest a role in inhibition of hypocotyl cell elongation. Expression is suppressed light grown seedlings transferred to the dark. The mRNA is cell-to-cell mobile. | 259.07 | 612.95  | 0.42 | 9.17E-04 | 2.03E-02 |
| 3833                                                                                                                                                                                                                                                                                                                                                                                                                                                        | 6 | M2-3 vs. S2-3 | 257177_at               | AT3G23490 | Encodes a cyanase that catalyzes the bicarbonate-dependent breakdown of cyanate to ammonia and bicarbonate. CYN forms a hexadecamer and is believed to be a cytosolic protein. Long-term exposure to NaCl increases CYN transcript levels. It is also expressed at higher levels in flowers relative to stems, roots, and seedlings.                                                                | 13.96  | 34.22   | 0.41 | 7.30E-06 | 2.81E-03 |
| 3834                                                                                                                                                                                                                                                                                                                                                                                                                                                        | 6 | M2-3 vs. S2-3 | 259166_at               | AT3G01670 | Encodes a protein localized to phloem filaments that is required for phloem filament formation.The mRNA is cell-to-cell mobile.                                                                                                                                                                                                                                                                     | 14.84  | 36.3    | 0.41 | 3.88E-04 | 1.48E-02 |
| 3835                                                                                                                                                                                                                                                                                                                                                                                                                                                        | 6 | M2-3 vs. S2-3 | 249313_at               | AT5G41560 | Encodes a substrate receptor for CRL4-CDD complexes that provides substrate specificity for CRL4 by interacting with ubiquitination targets. By its interaction and regulation of levels of PYL8 through proteasomal degradation, it negatively regulates ABA-mediated developmental responses, including inhibition of seed germination, seedling establishment, and root growth                   | 20.19  | 49.33   | 0.41 | 9.26E-04 | 2.04E-02 |
| 3836                                                                                                                                                                                                                                                                                                                                                                                                                                                        | 6 | M2-3 vs. S2-3 | 258709_at               | AT3G09500 | Ribosomal L29 family protein;(source:Araport11)                                                                                                                                                                                                                                                                                                                                                     | 349.15 | 867.28  | 0.4  | 2.85E-04 | 1.37E-02 |
| 3837                                                                                                                                                                                                                                                                                                                                                                                                                                                        | 6 | M2-3 vs. S2-3 | 251333_at               | AT3G61690 | Putative TNAase                                                                                                                                                                                                                                                                                                                                                                                     | 39.71  | 98.23   | 0.4  | 4.59E-04 | 1.57E-02 |

|      |   |               |            |           |                                                                                                                                                                                                                                                                                                                                                                                                                                                                             |        |         |      |          |          |
|------|---|---------------|------------|-----------|-----------------------------------------------------------------------------------------------------------------------------------------------------------------------------------------------------------------------------------------------------------------------------------------------------------------------------------------------------------------------------------------------------------------------------------------------------------------------------|--------|---------|------|----------|----------|
| 3838 | 6 | M2-3 vs. S2-3 | 267431_at  | AT2G34870 | hydroxyproline-rich glycoprotein family protein;(source:Araport11)                                                                                                                                                                                                                                                                                                                                                                                                          | 13.14  | 32.76   | 0.4  | 5.11E-04 | 1.65E-02 |
| 3839 | 6 | M2-3 vs. S2-3 | 251413_at  | AT3G60320 | bZIP domain class transcription factor (DUF630 and DUF632);(source:Araport11)                                                                                                                                                                                                                                                                                                                                                                                               | 67.13  | 169.28  | 0.4  | 5.55E-04 | 1.70E-02 |
| 3840 | 6 | M2-3 vs. S2-3 | 257570_at  | AT3G13662 | Disease resistance-responsive (dirigent-like protein) family protein;(source:Araport11)                                                                                                                                                                                                                                                                                                                                                                                     | 22.67  | 57.14   | 0.4  | 5.97E-04 | 1.75E-02 |
| 3841 | 6 | M2-3 vs. S2-3 | 262331_at  | AT1G64050 | hypothetical protein;(source:Araport11)                                                                                                                                                                                                                                                                                                                                                                                                                                     | 11.17  | 28.84   | 0.39 | 4.80E-04 | 1.58E-02 |
| 3842 | 6 | M2-3 vs. S2-3 | 246154_at  | AT5G19940 | Enables plants to cope with moderate light stress and affects cadmium tolerance. Ribosomal protein L12/ ATP-dependent Clp protease adaptor protein ClpS family protein;(source:Araport11)                                                                                                                                                                                                                                                                                   | 37.46  | 98.39   | 0.38 | 7.42E-04 | 1.94E-02 |
| 3843 | 6 | M2-3 vs. S2-3 | 258466_at  | AT3G06040 | maternal effect embryo arrest 59;(source:Araport11)                                                                                                                                                                                                                                                                                                                                                                                                                         | 21.7   | 56.53   | 0.38 | 7.92E-04 | 1.97E-02 |
| 3844 | 6 | M2-3 vs. S2-3 | 253049_at  | AT4G37300 | polyamine-modulated factor 1-binding protein;(source:Araport11)                                                                                                                                                                                                                                                                                                                                                                                                             | 24.11  | 64.79   | 0.37 | 2.06E-04 | 1.34E-02 |
| 3845 | 6 | M2-3 vs. S2-3 | 246905_at  | AT5G25570 | stress response NST1-like protein;(source:Araport11)                                                                                                                                                                                                                                                                                                                                                                                                                        | 10.59  | 28.53   | 0.37 | 3.91E-04 | 1.48E-02 |
| 3846 | 6 | M2-3 vs. S2-3 | 261886_s_a | AT1G80700 | Major facilitator superfamily protein;(source:Araport11)                                                                                                                                                                                                                                                                                                                                                                                                                    | 94.55  | 256.65  | 0.37 | 5.93E-04 | 1.75E-02 |
| 3847 | 6 | M2-3 vs. S2-3 | 253891_at  | AT4G27720 |                                                                                                                                                                                                                                                                                                                                                                                                                                                                             | 128.16 | 350.35  | 0.37 | 6.23E-04 | 1.79E-02 |
| 3848 | 6 | M2-3 vs. S2-3 | 262281_at  | AT1G68570 | NPF3.1 is a membrane localized GA transporter that is expressed in the root endodermis.                                                                                                                                                                                                                                                                                                                                                                                     | 14.21  | 38.69   | 0.37 | 7.32E-04 | 1.94E-02 |
| 3849 | 6 | M2-3 vs. S2-3 | 252601_s_a | AT3G45030 | Ribosomal protein S10p/S20e family protein;(source:Araport11)                                                                                                                                                                                                                                                                                                                                                                                                               | 378.29 | 1037.19 | 0.36 | 2.96E-05 | 6.32E-03 |
| 3850 | 6 | M2-3 vs. S2-3 | 258237_at  | AT3G27810 | Encodes a member of the R2R3-MYB transcription factor gene family. Induced by jasmonate. Involved in jasmonate response during stamen development. MYB21 interacts with JAZ proteins, and functions redundantly with MYB24 and MYB57 to regulate stamen development.                                                                                                                                                                                                        | 16.67  | 46.43   | 0.36 | 8.51E-05 | 1.02E-02 |
| 3851 | 6 | M2-3 vs. S2-3 | 252906_at  | AT4G39640 | The gene encodes a gamma-glutamyltransferase (AKA gamma-glutamyl transpeptidase, EC 2.3.2.2) that is located in vascular tissues (predominantly phloem) of leaves and is involved in the degradation of glutathione. The encoded enzyme also mitigates oxidative stress by metabolizing GSSG (oxidized form of GSH - glutathione) in the apoplast.                                                                                                                          | 23.91  | 66.22   | 0.36 | 1.04E-04 | 1.09E-02 |
| 3852 | 6 | M2-3 vs. S2-3 | 264056_at  | AT2G28510 | DOF transcription factor with a conserved zinc finger (ZF) DNA-binding domain.                                                                                                                                                                                                                                                                                                                                                                                              | 23.24  | 64.3    | 0.36 | 2.28E-04 | 1.34E-02 |
| 3853 | 6 | M2-3 vs. S2-3 | 246125_at  | AT5G19875 | transmembrane protein;(source:Araport11)                                                                                                                                                                                                                                                                                                                                                                                                                                    | 19.41  | 53.53   | 0.36 | 2.86E-04 | 1.37E-02 |
| 3854 | 6 | M2-3 vs. S2-3 | 249651_at  | AT5G37020 | Encodes a member of the auxin response factor family. Mediates auxin response via expression of auxin regulated genes. Acts redundantly with ARF6 to control stamen elongation and flower maturation. Expression of ARF8 is controlled by miR167.                                                                                                                                                                                                                           | 113.59 | 318.63  | 0.36 | 7.24E-04 | 1.94E-02 |
| 3855 | 6 | M2-3 vs. S2-3 | 252676_at  | AT3G44280 | peptidyl-prolyl cis-trans isomerase G;(source:Araport11)                                                                                                                                                                                                                                                                                                                                                                                                                    | 29.23  | 83.38   | 0.35 | 1.63E-05 | 4.08E-03 |
| 3856 | 6 | M2-3 vs. S2-3 | 258471_at  | AT3G06030 | NPK1-related protein kinase 3                                                                                                                                                                                                                                                                                                                                                                                                                                               | 17.56  | 50.73   | 0.35 | 3.82E-04 | 1.48E-02 |
| 3857 | 6 | M2-3 vs. S2-3 | 251860_at  | AT3G54660 | Encodes glutathione reductase that is most likely localized in the chloroplast.                                                                                                                                                                                                                                                                                                                                                                                             | 75.57  | 213.82  | 0.35 | 5.87E-04 | 1.75E-02 |
| 3858 | 6 | M2-3 vs. S2-3 | 260579_at  | AT2G47380 | Cytochrome c oxidase subunit Vc family protein;(source:Araport11)                                                                                                                                                                                                                                                                                                                                                                                                           | 165.68 | 471.51  | 0.35 | 7.24E-04 | 1.94E-02 |
| 3859 | 6 | M2-3 vs. S2-3 | 248200_at  | AT5G54160 | A caffeic acid/5-hydroxyferulic acid O-methyltransferase. Interacts with 14-4-3 proteins in yeast 2 hybrid assay. AtOMT1 (At5g54160) encodes a flavonol 3?-O-methyltransferase that is highly active towards quercetin and myricetin. The substrate specificity identifies the enzyme as flavonol 3?-methyltransferase which replaces the former annotation of the gene to encode a caffeic acid/5-hydroxyferulic acid O-methyltransferase The mRNA is cell-to-cell mobile. | 294.6  | 848.2   | 0.35 | 7.39E-04 | 1.94E-02 |
| 3860 | 6 | M2-3 vs. S2-3 | 266845_at  | AT2G26110 | bromodomain protein (DUF761);(source:Araport11)                                                                                                                                                                                                                                                                                                                                                                                                                             | 17.72  | 50.86   | 0.35 | 9.67E-04 | 2.06E-02 |
| 3861 | 6 | M2-3 vs. S2-3 | 249268_at  | AT5G41685 | Mitochondrial outer membrane translocase complex, subunit Tom7;(source:Araport11) Encodes a member of the PYR (pyrabactin resistance )/PYL(PYR1-like)/RCAR (regulatory components of ABA receptor) family proteins with 14 members. PYR/PYL/RCAR family proteins function as abscisic acid sensors. Mediate ABA-dependent regulation of protein phosphatase 2Cs                                                                                                             | 10.4   | 30.91   | 0.34 | 1.01E-04 | 1.09E-02 |
| 3862 | 6 | M2-3 vs. S2-3 | 250777_at  | AT5G05440 | ABI1 and ABI2.                                                                                                                                                                                                                                                                                                                                                                                                                                                              | 29.62  | 86.21   | 0.34 | 3.36E-04 | 1.42E-02 |
| 3863 | 6 | M2-3 vs. S2-3 | 250384_at  | AT5G11500 | coiled-coil protein;(source:Araport11)                                                                                                                                                                                                                                                                                                                                                                                                                                      | 201.99 | 589.52  | 0.34 | 8.41E-04 | 1.98E-02 |
| 3864 | 6 | M2-3 vs. S2-3 | 262206_at  | AT2G01090 | Ubiquinol-cytochrome C reductase hinge protein;(source:Araport11)                                                                                                                                                                                                                                                                                                                                                                                                           | 622.83 | 1887.53 | 0.33 | 4.47E-04 | 1.57E-02 |
| 3865 | 6 | M2-3 vs. S2-3 | 248387_at  | AT5G51960 | complex 1 protein, LYR family protein;(source:Araport11)                                                                                                                                                                                                                                                                                                                                                                                                                    | 41.32  | 124.75  | 0.33 | 7.53E-04 | 1.96E-02 |
| 3866 | 6 | M2-3 vs. S2-3 | 255443_at  | AT4G02700 | sulfate transporter 3;(source:Araport11)                                                                                                                                                                                                                                                                                                                                                                                                                                    | 15.72  | 48.89   | 0.32 | 1.12E-05 | 3.59E-03 |
| 3867 | 6 | M2-3 vs. S2-3 | 251662_at  | AT3G57080 | Non-catalytic subunit unique to Nuclear DNA-dependent RNA polymerase V; homologous to budding yeast RPB5.                                                                                                                                                                                                                                                                                                                                                                   | 15.54  | 48.61   | 0.32 | 3.79E-05 | 6.43E-03 |

|      |   |               |            |           |                                                                                                                                                                                                                                                                                                                                                                                                                                                                                                                                             |         |         |      |          |          |
|------|---|---------------|------------|-----------|---------------------------------------------------------------------------------------------------------------------------------------------------------------------------------------------------------------------------------------------------------------------------------------------------------------------------------------------------------------------------------------------------------------------------------------------------------------------------------------------------------------------------------------------|---------|---------|------|----------|----------|
|      |   |               |            |           | Predicted to encode a PR (pathogenesis-related) protein. Belongs to the plant defensin (PDF) family with the following members: At1g75830/PDF1.1, At5g44420/PDF1.2a, At2g26020/PDF1.2b, At5g44430/PDF1.2c, At2g26010/PDF1.3, At1g19610/PDF1.4, At1g55010/PDF1.5, At2g02120/PDF2.1, At2g02100/PDF2.2, At2g02130/PDF2.3, At1g61070/PDF2.4, At5g63660/PDF2.5, At2g02140/PDF2.6, At5g38330/PDF3.1 and At4g30070/PDF3.2. The mRNA is cell-to-cell mobile.                                                                                        | 496.59  | 1567.69 | 0.32 | 2.65E-04 | 1.37E-02 |
| 3868 | 6 | M2-3 vs. S2-3 | 266119_at  | AT2G02100 | cell-to-cell mobile.                                                                                                                                                                                                                                                                                                                                                                                                                                                                                                                        |         |         |      |          |          |
| 3869 | 6 | M2-3 vs. S2-3 | 250511_at  | AT5G09960 | sorbin/SH3 domain protein;(source:Araport11)                                                                                                                                                                                                                                                                                                                                                                                                                                                                                                | 56.63   | 175.93  | 0.32 | 8.34E-04 | 1.98E-02 |
| 3870 | 6 | M2-3 vs. S2-3 | 249755_at  | AT5G24580 | Heavy metal transport/detoxification superfamily protein;(source:Araport11)                                                                                                                                                                                                                                                                                                                                                                                                                                                                 | 23.64   | 75.35   | 0.31 | 1.74E-04 | 1.29E-02 |
| 3871 | 6 | M2-3 vs. S2-3 | 248041_at  | AT5G55940 | Uncharacterized protein family (UPF0172);(source:Araport11)                                                                                                                                                                                                                                                                                                                                                                                                                                                                                 | 96.46   | 307.58  | 0.31 | 2.28E-04 | 1.34E-02 |
| 3872 | 6 | M2-3 vs. S2-3 | 257311_at  | AT3G26570 | low affinity phosphate transporter                                                                                                                                                                                                                                                                                                                                                                                                                                                                                                          | 68.68   | 219.2   | 0.31 | 3.39E-04 | 1.42E-02 |
| 3873 | 6 | M2-3 vs. S2-3 | 258846_at  | AT3G03070 | NADH-ubiquinone oxidoreductase-like protein;(source:Araport11)                                                                                                                                                                                                                                                                                                                                                                                                                                                                              | 14.39   | 46.55   | 0.31 | 5.28E-04 | 1.69E-02 |
| 3874 | 6 | M2-3 vs. S2-3 | 256979_at  | AT3G21055 | Encodes photosystem II 5 kD protein subunit PSII-T. This is a nuclear-encoded gene (PsbTn) which also has a plastid-encoded paralog (PsbTc).                                                                                                                                                                                                                                                                                                                                                                                                | 145.86  | 472.39  | 0.31 | 5.51E-04 | 1.70E-02 |
| 3875 | 6 | M2-3 vs. S2-3 | 259308_at  | AT3G05180 | GDSL-motif esterase/acyltransferase/lipase. Enzyme group with broad substrate specificity that may catalyze acyltransfer or hydrolase reactions with lipid and non-lipid substrates.                                                                                                                                                                                                                                                                                                                                                        | 11.93   | 38.79   | 0.31 | 8.73E-04 | 1.98E-02 |
| 3876 | 6 | M2-3 vs. S2-3 | 255035_at  | AT4G09550 | Encodes a gamma-tubulin complex protein that plays a role in gamma-tubulin complex localization, spindle stability and chromosomal segregation.                                                                                                                                                                                                                                                                                                                                                                                             | 55.89   | 186.96  | 0.3  | 4.78E-04 | 1.58E-02 |
| 3877 | 6 | M2-3 vs. S2-3 | 247566_at  | AT5G61170 | Ribosomal protein S19e family protein;(source:Araport11)                                                                                                                                                                                                                                                                                                                                                                                                                                                                                    | 659.9   | 2396.68 | 0.28 | 2.20E-04 | 1.34E-02 |
| 3878 | 6 | M2-3 vs. S2-3 | 266150_s_a | AT2G12290 | hypothetical protein;(source:Araport11)                                                                                                                                                                                                                                                                                                                                                                                                                                                                                                     | 24.34   | 88.43   | 0.28 | 6.46E-04 | 1.83E-02 |
| 3879 | 6 | M2-3 vs. S2-3 | 254694_at  | AT4G17900 | PLATZ transcription factor family protein;(source:Araport11)                                                                                                                                                                                                                                                                                                                                                                                                                                                                                | 68.34   | 252.31  | 0.27 | 2.82E-04 | 1.37E-02 |
| 3880 | 6 | M2-3 vs. S2-3 | 246506_at  | AT5G16110 | hypothetical protein;(source:Araport11)                                                                                                                                                                                                                                                                                                                                                                                                                                                                                                     | 45.1    | 166.49  | 0.27 | 3.38E-04 | 1.42E-02 |
| 3881 | 6 | M2-3 vs. S2-3 | 251997_at  | AT3G53020 | RPL24B encodes ribosomal protein L24, homolog of cytosolic RPL24, found in archaea and higher eukaryotes. Arabidopsis has two RPL24 homologs, RPL24A (AT2G36620) and RPL24B. Mutants showed defects in apical-basal gynoecium patterning similar to previously described ett and mp mutants. Transformation of stv1-1 mutant with a uORF-eliminated ETT construct partially suppressed the stv1 gynoecium phenotype, implying that STV1 could influence ETT translation through its uORFs. Regulated by TCP20.                              | 547.79  | 2018.22 | 0.27 | 4.08E-04 | 1.49E-02 |
| 3882 | 6 | M2-3 vs. S2-3 | 250517_at  | AT5G08260 | serine carboxypeptidase-like 35;(source:Araport11)                                                                                                                                                                                                                                                                                                                                                                                                                                                                                          | 28.71   | 104.69  | 0.27 | 5.48E-04 | 1.70E-02 |
| 3883 | 6 | M2-3 vs. S2-3 | 252789_s_a | AT1G21930 | transmembrane protein;(source:Araport11)                                                                                                                                                                                                                                                                                                                                                                                                                                                                                                    | 260.96  | 968.98  | 0.27 | 6.61E-04 | 1.86E-02 |
| 3884 | 6 | M2-3 vs. S2-3 | 266352_at  | AT2G01610 | Plant invertase/pectin methylesterase inhibitor superfamily protein;(source:Araport11)                                                                                                                                                                                                                                                                                                                                                                                                                                                      | 34.72   | 126.91  | 0.27 | 7.36E-04 | 1.94E-02 |
| 3885 | 6 | M2-3 vs. S2-3 | 253264_at  | AT4G33950 | Encodes calcium-independent ABA-activated protein kinase, a member of SNF1-related protein kinases (SnRK2) whose activity is activated by ionic (salt) and non-ionic (mannitol) osmotic stress. Mutations disrupted ABA induction of stomatal closure as well as ABA inhibition of light-induced stomatal opening. However, regulation of stomatal opening/closing by light or CO(2) is not affected in these mutants. May act in the interval between ABA perception and reactive oxygen species production in the ABA signalling network. | 41.65   | 151.79  | 0.27 | 9.94E-04 | 2.10E-02 |
| 3886 | 6 | M2-3 vs. S2-3 | 259538_at  | AT1G12310 | Calcium-binding EF-hand family protein;(source:Araport11)                                                                                                                                                                                                                                                                                                                                                                                                                                                                                   | 45.78   | 174.78  | 0.26 | 4.80E-06 | 2.31E-03 |
| 3887 | 6 | M2-3 vs. S2-3 | 255140_x_a | AT4G08410 | Proline-rich extensin-like family protein;(source:Araport11)                                                                                                                                                                                                                                                                                                                                                                                                                                                                                | 23.01   | 89.21   | 0.26 | 9.23E-05 | 1.04E-02 |
| 3888 | 6 | M2-3 vs. S2-3 | 265115_at  | AT1G62450 | Immunoglobulin E-set superfamily protein;(source:Araport11)                                                                                                                                                                                                                                                                                                                                                                                                                                                                                 | 12.97   | 49.9    | 0.26 | 2.30E-04 | 1.34E-02 |
| 3889 | 6 | M2-3 vs. S2-3 | 266460_at  | AT2G47930 | arabinogalactan protein 26;(source:Araport11)                                                                                                                                                                                                                                                                                                                                                                                                                                                                                               | 16.47   | 67.03   | 0.25 | 2.10E-06 | 1.51E-03 |
| 3890 | 6 | M2-3 vs. S2-3 | 261572_at  | AT1G01170 | ozone-responsive stress-like protein (DUF1138);(source:Araport11)                                                                                                                                                                                                                                                                                                                                                                                                                                                                           | 134.16  | 528.54  | 0.25 | 2.61E-04 | 1.37E-02 |
| 3891 | 6 | M2-3 vs. S2-3 | 247148_at  | AT5G65670 | auxin (indole-3-acetic acid) induced gene The mRNA is cell-to-cell mobile.                                                                                                                                                                                                                                                                                                                                                                                                                                                                  | 310.98  | 1258.07 | 0.25 | 7.78E-04 | 1.97E-02 |
| 3892 | 6 | M2-3 vs. S2-3 | 256311_at  | AT1G30330 | Encodes a member of the auxin response factor family. Mediates auxin response via expression of auxin regulated genes. Acts redundantly with ARF8 to control stamen elongation and flower maturation. Expression of ARF6 is controlled by miR167.                                                                                                                                                                                                                                                                                           | 288.46  | 1207.57 | 0.24 | 1.79E-04 | 1.30E-02 |
| 3893 | 6 | M2-3 vs. S2-3 | 266768_s_a | AT2G47110 | polyubiquitin gene The mRNA is cell-to-cell mobile.                                                                                                                                                                                                                                                                                                                                                                                                                                                                                         | 1145.59 | 4720.05 | 0.24 | 3.05E-04 | 1.41E-02 |
| 3894 | 6 | M2-3 vs. S2-3 | 258699_at  | AT3G09455 | dolichyl-diphosphooligosaccharide-protein glycosyltransferase subunit;(source:Araport11)                                                                                                                                                                                                                                                                                                                                                                                                                                                    | 131.25  | 548.13  | 0.24 | 3.96E-04 | 1.48E-02 |
| 3895 | 6 | M2-3 vs. S2-3 | 247192_at  | AT5G65360 | Histone superfamily protein;(source:Araport11)                                                                                                                                                                                                                                                                                                                                                                                                                                                                                              | 20.45   | 84.99   | 0.24 | 4.41E-04 | 1.57E-02 |
| 3896 | 6 | M2-3 vs. S2-3 | 253382_at  | AT4G33040 | Encodes a member of the CC-type glutaredoxin (ROXY) family that has been shown to interact with the transcription factor TGA2.                                                                                                                                                                                                                                                                                                                                                                                                              | 149.92  | 625.42  | 0.24 | 4.66E-04 | 1.57E-02 |



|      |   |               |            |           |                                                                                                                                                                                                                                                                                                                                                                                                                                                                                       |        |         |      |          |          |
|------|---|---------------|------------|-----------|---------------------------------------------------------------------------------------------------------------------------------------------------------------------------------------------------------------------------------------------------------------------------------------------------------------------------------------------------------------------------------------------------------------------------------------------------------------------------------------|--------|---------|------|----------|----------|
| 3897 | 6 | M2-3 vs. S2-3 | 245253_at  | AT4G15440 | Encodes a hydroperoxide lyase. Also a member of the CYP74B cytochrome p450 family. In the ecotype Columbia (Col) the gene contains a 10-nucleotide deletion in its first exon that causes it to code for a truncated protein that results in a non-functional hydroperoxide lyase.                                                                                                                                                                                                    | 27.2   | 120.39  | 0.23 | 8.80E-06 | 3.17E-03 |
| 3898 | 6 | M2-3 vs. S2-3 | 264173_at  | AT1G02160 | Cox19 family protein (CHCH motif);(source:Araport11)                                                                                                                                                                                                                                                                                                                                                                                                                                  | 117.82 | 532.06  | 0.22 | 4.36E-04 | 1.56E-02 |
| 3899 | 6 | M2-3 vs. S2-3 | 248747_at  | AT5G47930 | Zinc-binding ribosomal protein family protein;(source:Araport11)                                                                                                                                                                                                                                                                                                                                                                                                                      | 212.68 | 976.3   | 0.22 | 6.07E-04 | 1.76E-02 |
| 3900 | 6 | M2-3 vs. S2-3 | 245842_at  | AT1G58430 | Encodes an anther-specific proline-rich protein.                                                                                                                                                                                                                                                                                                                                                                                                                                      | 12.4   | 58.56   | 0.21 | 1.62E-04 | 1.29E-02 |
| 3901 | 6 | M2-3 vs. S2-3 | 254083_at  | AT4G24920 | secE/sec61-gamma protein transport protein;(source:Araport11)                                                                                                                                                                                                                                                                                                                                                                                                                         | 162.85 | 783.15  | 0.21 | 8.61E-04 | 1.98E-02 |
| 3902 | 6 | M2-3 vs. S2-3 | 252235_at  | AT3G49910 | Translation protein SH3-like family protein;(source:Araport11)                                                                                                                                                                                                                                                                                                                                                                                                                        | 850.63 | 4021.99 | 0.21 | 9.31E-04 | 2.04E-02 |
| 3903 | 6 | M2-3 vs. S2-3 | 261149_s_a | AT1G19550 | Glutathione S-transferase family protein;(source:Araport11)                                                                                                                                                                                                                                                                                                                                                                                                                           | 354.43 | 1817.27 | 0.2  | 2.90E-06 | 1.67E-03 |
| 3904 | 6 | M2-3 vs. S2-3 | 260257_at  | AT1G74340 | Encodes a subunit of the dolichol phosphate mannanase synthase (DPMS) complex that may serve as membrane anchors for the catalytic core, DPMS1, or provide catalytic assistance. It is localized in the ER and mediates isoprenyl-linked glycan biogenesis.                                                                                                                                                                                                                           | 73.42  | 360.13  | 0.2  | 1.28E-04 | 1.21E-02 |
| 3905 | 6 | M2-3 vs. S2-3 | 251007_at  | AT5G02610 | Ribosomal L29 family protein;(source:Araport11)                                                                                                                                                                                                                                                                                                                                                                                                                                       | 90.82  | 462.04  | 0.2  | 1.47E-04 | 1.26E-02 |
| 3906 | 6 | M2-3 vs. S2-3 | 255243_at  | AT4G05590 | Encodes NRG1, a putative mitochondrial pyruvate carrier that mediates ABA regulation of guard cell ion channels and drought stress responses. Encodes AKINbeta1, a subunit of the SnRK1 kinase (Sucrose non-fermenting-1-related protein kinase). Involved in regulation of nitrogen and sugar metabolism. As part of the regulatory subunit, it binds maltose which promotes kinase activity. Acts as a global regulator of genes involved in carbon, lipid and nitrogen metabolism. | 12.24  | 62.45   | 0.2  | 2.42E-04 | 1.35E-02 |
| 3907 | 6 | M2-3 vs. S2-3 | 246028_at  | AT5G21170 | SAUR-like auxin-responsive protein family;(source:Araport11)                                                                                                                                                                                                                                                                                                                                                                                                                          | 38.46  | 189.08  | 0.2  | 2.85E-04 | 1.37E-02 |
| 3908 | 6 | M2-3 vs. S2-3 | 259331_at  | AT3G03840 | Encodes a putative 2OG-Fe(II) oxygenase that is defense-associated but required for susceptibility to downy mildew. The mRNA is cell-to-cell mobile.                                                                                                                                                                                                                                                                                                                                  | 9.06   | 44.62   | 0.2  | 3.28E-04 | 1.42E-02 |
| 3909 | 6 | M2-3 vs. S2-3 | 249754_at  | AT5G24530 | Predicted to encode a PR (pathogenesis-related) protein. Belongs to the plant defensin (PDF) family with the following members: At1g75830/PDF1.1, At5g44420/PDF1.2a, At2g26020/PDF1.2b, At5g44430/PDF1.2c, At2g26010/PDF1.3, At1g19610/PDF1.4, At1g55010/PDF1.5, At2g02120/PDF2.1, At2g02100/PDF2.2, At2g02130/PDF2.3, At1g61070/PDF2.4, At5g63660/PDF2.5, At2g02140/PDF2.6, At5g38330/PDF3.1 and At4g30070/PDF3.2. The mRNA is cell-to-cell mobile.                                  | 50.35  | 254.74  | 0.2  | 4.06E-04 | 1.49E-02 |
| 3910 | 6 | M2-3 vs. S2-3 | 266118_at  | AT2G02130 |                                                                                                                                                                                                                                                                                                                                                                                                                                                                                       | 31.78  | 166.58  | 0.19 | 2.60E-06 | 1.67E-03 |
| 3911 | 6 | M2-3 vs. S2-3 | 265768_at  | AT2G48020 | Encodes a zinc transporter ZIF2. Expression of ZIF2 is regulated by alternative splicing.                                                                                                                                                                                                                                                                                                                                                                                             | 61.95  | 322.79  | 0.19 | 3.75E-05 | 6.43E-03 |
| 3912 | 6 | M2-3 vs. S2-3 | 254137_at  | AT4G24930 | thylakoid lumenal 17.9 kDa protein, chloroplast;(source:Araport11)                                                                                                                                                                                                                                                                                                                                                                                                                    | 19.94  | 106.68  | 0.19 | 1.18E-04 | 1.16E-02 |
| 3913 | 6 | M2-3 vs. S2-3 | 265741_at  | AT2G01320 | ABC-2 type transporter family protein;(source:Araport11)                                                                                                                                                                                                                                                                                                                                                                                                                              | 15.06  | 78.51   | 0.19 | 1.27E-04 | 1.21E-02 |
| 3914 | 6 | M2-3 vs. S2-3 | 254915_s_a | AT4G11310 | cysteine proteinase precursor-like protein                                                                                                                                                                                                                                                                                                                                                                                                                                            | 15.93  | 88.99   | 0.18 | 2.88E-05 | 6.32E-03 |
| 3915 | 6 | M2-3 vs. S2-3 | 258003_at  | AT3G29030 | Encodes an expansin. Naming convention from the Expansin Working Group (Kende et al, 2004. Plant Mol Bio) An Arabidopsis thaliana homolog of Medicago truncatula NODULIN21 (MtN21). The gene encodes a plant-specific, predicted integral membrane protein and is a member of the Plant-Drug/Metabolite Exporter (P-DME) family (Transporter Classification number: TC 2.A.7.3) and the nodulin MtN21-like transporter family.                                                        | 26.13  | 147.73  | 0.18 | 1.85E-04 | 1.33E-02 |
| 3916 | 6 | M2-3 vs. S2-3 | 262951_at  | AT1G75500 | Calcium-dependent lipid-binding (CaLB domain) family protein;(source:Araport11)                                                                                                                                                                                                                                                                                                                                                                                                       | 81.53  | 464.06  | 0.18 | 7.36E-04 | 1.94E-02 |
| 3917 | 6 | M2-3 vs. S2-3 | 253284_at  | AT4G34150 | UDP-Glycosyltransferase superfamily protein;(source:Araport11)                                                                                                                                                                                                                                                                                                                                                                                                                        | 19.46  | 113.66  | 0.17 | 1.85E-05 | 4.44E-03 |
| 3918 | 6 | M2-3 vs. S2-3 | 247163_at  | AT5G65685 |                                                                                                                                                                                                                                                                                                                                                                                                                                                                                       | 25.64  | 148.65  | 0.17 | 3.75E-04 | 1.48E-02 |
| 3919 | 6 | M2-3 vs. S2-3 | 263420_at  | AT2G17240 | Participates in the late stages of the biogenesis of 50S ribosomal subunits in plastids.                                                                                                                                                                                                                                                                                                                                                                                              | 62.32  | 363.8   | 0.17 | 3.99E-04 | 1.49E-02 |
| 3920 | 6 | M2-3 vs. S2-3 | 265984_at  | AT2G24210 | terpene synthase 10;(source:Araport11)                                                                                                                                                                                                                                                                                                                                                                                                                                                | 13.2   | 78.07   | 0.17 | 7.88E-04 | 1.97E-02 |
| 3921 | 6 | M2-3 vs. S2-3 | 257701_at  | AT3G12710 | DNA glycosylase superfamily protein;(source:Araport11) Encodes an auxin response factor. Mutants have many defects including enlarged rosette leaves, reduced fertility, later senescence, hypocotyl elongation defects, enlarged seeds and enlarged cotyledons. May not mediate auxin effects. Increase in seed size due to increased cell proliferation.                                                                                                                            | 20.62  | 125.8   | 0.16 | 8.67E-05 | 1.02E-02 |
| 3922 | 6 | M2-3 vs. S2-3 | 247468_at  | AT5G62000 | The mRNA is cell-to-cell mobile.                                                                                                                                                                                                                                                                                                                                                                                                                                                      | 202.38 | 1235.81 | 0.16 | 9.02E-05 | 1.04E-02 |
| 3923 | 6 | M2-3 vs. S2-3 | 246044_at  | AT5G19450 | calcium-dependent protein kinase (CDPK19) mRNA, complete                                                                                                                                                                                                                                                                                                                                                                                                                              | 60.45  | 372.68  | 0.16 | 1.91E-04 | 1.34E-02 |
| 3924 | 6 | M2-3 vs. S2-3 | 267298_at  | AT2G23760 | Encodes a member of the BEL family of homeodomain proteins. Plants doubly mutant for saw1/saw2 (blh2/blh4) have serrated leaves. BP is expressed in the serrated leaves, therefore saw2 and saw1 may act redundantly to repress BP in leaves. Regulates together with BLH2 demethylesterification of homogalacturonan in seed mucilage.                                                                                                                                               | 12.95  | 82.17   | 0.16 | 3.96E-04 | 1.48E-02 |

|                                                                                                                                                                                                                                                                                                                                                                                                                               |   |               |            |           |                                                                                                                                                                                                                                                                                                                                                                                             |         |         |       |          |          |
|-------------------------------------------------------------------------------------------------------------------------------------------------------------------------------------------------------------------------------------------------------------------------------------------------------------------------------------------------------------------------------------------------------------------------------|---|---------------|------------|-----------|---------------------------------------------------------------------------------------------------------------------------------------------------------------------------------------------------------------------------------------------------------------------------------------------------------------------------------------------------------------------------------------------|---------|---------|-------|----------|----------|
| 3925                                                                                                                                                                                                                                                                                                                                                                                                                          | 6 | M2-3 vs. S2-3 | 247450_at  | AT5G62350 | Plant invertase/pectin methyltransferase inhibitor superfamily protein;(source:Araport11)                                                                                                                                                                                                                                                                                                   | 117.38  | 740.75  | 0.16  | 4.67E-04 | 1.57E-02 |
| 3926                                                                                                                                                                                                                                                                                                                                                                                                                          | 6 | M2-3 vs. S2-3 | 266123_at  | AT2G45180 | Bifunctional inhibitor/lipid-transfer protein/seed storage 2S albumin superfamily protein;(source:Araport11)                                                                                                                                                                                                                                                                                | 101.7   | 665.55  | 0.15  | 8.85E-04 | 2.00E-02 |
| 3927                                                                                                                                                                                                                                                                                                                                                                                                                          | 6 | M2-3 vs. S2-3 | 246747_at  | AT5G27700 | Cytosolic ribosomal protein. Similar to EVR1 and redundant with EVR1. Also enhances VAR2 mutant variegation, but to a lesser extent than evr1.                                                                                                                                                                                                                                              | 276.44  | 1984.55 | 0.14  | 2.86E-04 | 1.37E-02 |
| 3928                                                                                                                                                                                                                                                                                                                                                                                                                          | 6 | M2-3 vs. S2-3 | 261489_at  | AT1G14450 | NADH dehydrogenase (ubiquinone)s;(source:Araport11)                                                                                                                                                                                                                                                                                                                                         | 42.93   | 315.96  | 0.14  | 8.91E-04 | 2.01E-02 |
| 3929                                                                                                                                                                                                                                                                                                                                                                                                                          | 6 | M2-3 vs. S2-3 | 255298_at  | AT4G04840 | methionine sulfoxide reductase B6;(source:Araport11)                                                                                                                                                                                                                                                                                                                                        | 15.67   | 124.41  | 0.13  | 3.63E-05 | 6.43E-03 |
| Encodes a protein belonging to the subgroup of HMGB (high mobility group B) proteins that have a distinctive DNA-binding motif, the HMG-box domain. The motif confers non-sequence specific interaction with linear DNA and structure-specific binding to distorted DNA sites. The HMGB proteins are involved in the assembly of nucleoprotein complexes. Can be phosphorylated by CK2alpha. The mRNA is cell-to-cell mobile. |   |               |            |           |                                                                                                                                                                                                                                                                                                                                                                                             | 36.39   | 275.53  | 0.13  | 5.87E-05 | 8.25E-03 |
| 3930                                                                                                                                                                                                                                                                                                                                                                                                                          | 6 | M2-3 vs. S2-3 | 256091_at  | AT1G20693 | xyloglucan endotransglucosylase/hydrolase 6;(source:Araport11)                                                                                                                                                                                                                                                                                                                              | 13.71   | 102.75  | 0.13  | 2.58E-04 | 1.37E-02 |
| 3931                                                                                                                                                                                                                                                                                                                                                                                                                          | 6 | M2-3 vs. S2-3 | 247162_at  | AT5G65730 | NADH dehydrogenase (ubiquinone)s;(source:Araport11)                                                                                                                                                                                                                                                                                                                                         | 125.26  | 984.95  | 0.13  | 8.45E-04 | 1.98E-02 |
| 3932                                                                                                                                                                                                                                                                                                                                                                                                                          | 6 | M2-3 vs. S2-3 | 267239_at  | AT2G02510 | NADH dehydrogenase ND4L                                                                                                                                                                                                                                                                                                                                                                     | 123.7   | 1004.57 | 0.12  | 3.38E-04 | 1.42E-02 |
| 3933                                                                                                                                                                                                                                                                                                                                                                                                                          | 6 | M2-3 vs. S2-3 | 244933_at  | ATCG01070 | Encodes a member of the X8-GPI family of proteins. It localizes to the plasmodesmata and binds callose.                                                                                                                                                                                                                                                                                     | 70.68   | 586.64  | 0.12  | 4.54E-04 | 1.57E-02 |
| 3934                                                                                                                                                                                                                                                                                                                                                                                                                          | 6 | M2-3 vs. S2-3 | 250565_at  | AT5G08000 | transmembrane protein;(source:Araport11)                                                                                                                                                                                                                                                                                                                                                    | 50.17   | 409.72  | 0.12  | 5.71E-04 | 1.74E-02 |
| 3935                                                                                                                                                                                                                                                                                                                                                                                                                          | 6 | M2-3 vs. S2-3 | 266906_at  | AT2G34585 | Phosphorylase superfamily protein;(source:Araport11)                                                                                                                                                                                                                                                                                                                                        | 17.75   | 165.3   | 0.11  | 1.30E-06 | 1.25E-03 |
| 3936                                                                                                                                                                                                                                                                                                                                                                                                                          | 6 | M2-3 vs. S2-3 | 254163_s_a | AT4G24350 | senescence-associated family protein (DUF581);(source:Araport11)                                                                                                                                                                                                                                                                                                                            | 36.99   | 355.08  | 0.1   | 4.61E-05 | 7.38E-03 |
| 3937                                                                                                                                                                                                                                                                                                                                                                                                                          | 6 | M2-3 vs. S2-3 | 266882_at  | AT2G44670 | Encodes a nitrile-specifier protein NSP4. NSP4 is one out of five (At3g16400/NSP1, At2g33070/NSP2, At3g16390/NSP3, At3g16410/NSP4 and At5g48180/NSP5) A. thaliana epithiospecifier protein (ESP) homologues that promote simple nitrile, but not epithionitrile or thiocyanate formation. The mRNA is cell-to-cell mobile.                                                                  | 77.01   | 764.71  | 0.1   | 2.28E-04 | 1.34E-02 |
| 3938                                                                                                                                                                                                                                                                                                                                                                                                                          | 6 | M2-3 vs. S2-3 | 259381_s_a | AT3G16410 | Encodes a cytosolic 6-phosphogluconolactonase (PGL) thought to be involved in the oxidative pentose-phosphate pathway (OPPP).                                                                                                                                                                                                                                                               | 15.11   | 195.99  | 0.077 | 1.30E-06 | 1.25E-03 |
| 3939                                                                                                                                                                                                                                                                                                                                                                                                                          | 6 | M2-3 vs. S2-3 | 249732_at  | AT5G24420 | Encodes a tonoplast intrinsic protein, which functions as water channel. It has also been shown to be able to facilitate the transport of urea and hydrogen peroxide. Highly expressed in vascular tissues of the root, stem, cauline leaves and flowers but not in the apical meristems. The mRNA is cell-to-cell mobile.                                                                  | 74.45   | 1068.2  | 0.07  | 1.96E-04 | 1.34E-02 |
| 3940                                                                                                                                                                                                                                                                                                                                                                                                                          | 6 | M2-3 vs. S2-3 | 263867_at  | AT2G36830 | Pectin methyltransferase inhibitor expressed throughout the plant.                                                                                                                                                                                                                                                                                                                          | 11.48   | 186.62  | 0.062 | 5.51E-05 | 7.94E-03 |
| 3941                                                                                                                                                                                                                                                                                                                                                                                                                          | 6 | M2-3 vs. S2-3 | 247478_at  | AT5G62360 | Encodes a member of the YABBY family of transcriptional regulators that is involved in abaxial cell type specification in leaves and fruits. YAB1 acts in a non-cell autonomous fashion within the meristem to affect phyllotactic patterning. The non-autonomous effect on the central region of the meristem is mediated through the activity of Lateral Suppressor (LAS).                | 20.4    | 455.16  | 0.045 | 6.30E-06 | 2.79E-03 |
| 3942                                                                                                                                                                                                                                                                                                                                                                                                                          | 6 | M2-3 vs. S2-3 | 245138_at  | AT2G45190 | MADS box gene negatively regulated by APETALA1                                                                                                                                                                                                                                                                                                                                              | 15.98   | 398.67  | 0.04  | 1.00E-06 | 1.25E-03 |
| 3943                                                                                                                                                                                                                                                                                                                                                                                                                          | 6 | M2-3 vs. S2-3 | 247553_at  | AT5G60910 | Ribosomal protein L30/L7 family protein;(source:Araport11)                                                                                                                                                                                                                                                                                                                                  | 13.66   | 349.33  | 0.039 | 4.40E-06 | 2.31E-03 |
| 3944                                                                                                                                                                                                                                                                                                                                                                                                                          | 6 | M2-3 vs. S2-3 | 267213_at  | AT2G44120 | Encodes a cis-cinnamic acid responsive gene that is a member of the major latex protein-like gene family and plays a role in promoting vegetative growth and delaying senescence. The mRNA is cell-to-cell mobile.                                                                                                                                                                          | 110.68  | 2827.8  | 0.039 | 9.50E-06 | 3.22E-03 |
| 3945                                                                                                                                                                                                                                                                                                                                                                                                                          | 6 | M2-3 vs. S2-3 | 266353_at  | AT2G01520 | Encodes a putative transcriptional regulator that is involved in the vegetative to reproductive phase transition. Expression is regulated by MIR156b. SPL activity nonautonomously inhibits initiation of new leaves at the shoot apical meristem.                                                                                                                                          | 22.49   | 575.57  | 0.039 | 1.44E-05 | 3.85E-03 |
| 3946                                                                                                                                                                                                                                                                                                                                                                                                                          | 6 | M2-3 vs. S2-3 | 267639_at  | AT2G42200 | Encodes a cytosolic 6-phosphogluconolactonase (PGL) thought to be involved in the oxidative pentose-phosphate pathway (OPPP).                                                                                                                                                                                                                                                               | 63.18   | 2524.14 | 0.025 | 7.00E-04 | 1.94E-02 |
| 3947                                                                                                                                                                                                                                                                                                                                                                                                                          | 6 | M2-3 vs. S2-3 | 252282_at  | AT3G49360 | Encodes a pectin methyltransferase implicated in the remodeling of pectins in pollen. Its expression is restricted to the male gametophyte (dry pollen, imbibed pollen and pollen tube). Mutants do not display any phenotype in the vegetative tissues. Pollen germination of KO mutant is strongly delayed in vivo and in vitro. Extra calcium restores the wild type phenotype in vitro. | 6125.4  | 7.83    | 782.2 | < 1e-07  | < 1e-07  |
| 3948                                                                                                                                                                                                                                                                                                                                                                                                                          | 7 | F2-3 vs. S2-3 | 250606_s_a | AT5G07410 | Share high homologies with a group of pectin methyltransferases (PME), pollen specific, and is required for enhancing the growth of pollen tube in style and transmitting tract tissues.                                                                                                                                                                                                    | 7363.02 | 11.31   | 651.2 | < 1e-07  | < 1e-07  |
| 3949                                                                                                                                                                                                                                                                                                                                                                                                                          | 7 | F2-3 vs. S2-3 | 266750_s_a | AT2G47040 |                                                                                                                                                                                                                                                                                                                                                                                             |         |         |       |          |          |

|      |   |               |                         |           |                                                                                                                                                                                                                                                                                                   |         |        |        |          |          |
|------|---|---------------|-------------------------|-----------|---------------------------------------------------------------------------------------------------------------------------------------------------------------------------------------------------------------------------------------------------------------------------------------------------|---------|--------|--------|----------|----------|
| 3950 | 7 | F2-3 vs. S2-3 | 245010_at<br>246880_s_a | ATCG00420 | Encodes NADH dehydrogenase subunit J. Its transcription is increased upon sulfur depletion. Myrosinase (thioglucoside glucohydrolase) gene involved in glucosinolate metabolism. The mRNA is cell-to-cell mobile.                                                                                 | 8804.59 | 26.58  | 331.21 | < 1e-07  | < 1e-07  |
| 3951 | 7 | F2-3 vs. S2-3 | t                       | AT5G25980 |                                                                                                                                                                                                                                                                                                   | 8698.56 | 26.96  | 322.63 | < 1e-07  | < 1e-07  |
| 3952 | 7 | F2-3 vs. S2-3 | 251258_at               | AT3G62170 | VANGUARD-like protein;(source:Araport11)                                                                                                                                                                                                                                                          | 2375.01 | 11.16  | 212.81 | < 1e-07  | < 1e-07  |
| 3953 | 7 | F2-3 vs. S2-3 | 256966_at               | AT3G13400 | SKU5 similar 13;(source:Araport11)                                                                                                                                                                                                                                                                | 2543.16 | 13.46  | 188.88 | < 1e-07  | < 1e-07  |
| 3954 | 7 | F2-3 vs. S2-3 | 259269_at               | AT3G01270 | Pectate lyase family protein;(source:Araport11)                                                                                                                                                                                                                                                   | 2755.66 | 15.63  | 176.27 | < 1e-07  | < 1e-07  |
| 3955 | 7 | F2-3 vs. S2-3 | 261438_at               | AT1G07600 | metallothionein, binds to and detoxifies excess copper and other metals, limiting oxidative damage.                                                                                                                                                                                               | 6953.4  | 42.95  | 161.9  | < 1e-07  | < 1e-07  |
| 3956 | 7 | F2-3 vs. S2-3 | 255515_at               | AT4G02250 | Plant invertase/pectin methylesterase inhibitor superfamily protein;(source:Araport11)                                                                                                                                                                                                            | 1484.66 | 11     | 134.97 | < 1e-07  | < 1e-07  |
| 3957 | 7 | F2-3 vs. S2-3 | 248227_at               | AT5G53820 | Late embryogenesis abundant protein (LEA) family protein;(source:Araport11)                                                                                                                                                                                                                       | 1194.71 | 9.19   | 130.05 | < 1e-07  | < 1e-07  |
| 3958 | 7 | F2-3 vs. S2-3 | 265127_at               | AT1G55560 | SKU5 similar 14;(source:Araport11)                                                                                                                                                                                                                                                                | 1191.5  | 9.72   | 122.61 | < 1e-07  | < 1e-07  |
| 3959 | 7 | F2-3 vs. S2-3 | 248926_at               | AT5G45880 | Pollen Ole e 1 allergen and extensin family protein;(source:Araport11)                                                                                                                                                                                                                            | 1889.99 | 20.94  | 90.27  | < 1e-07  | < 1e-07  |
| 3960 | 7 | F2-3 vs. S2-3 | 245946_at               | AT5G19580 | glyoxal oxidase-related protein;(source:Araport11)                                                                                                                                                                                                                                                | 1367.93 | 16.74  | 81.71  | < 1e-07  | < 1e-07  |
| 3961 | 7 | F2-3 vs. S2-3 | 261410_at               | AT1G07610 | one of the five metallothioneins (MTs) genes identified in Arabidopsis. MTs are cysteine-rich proteins required for heavy metal tolerance. The mRNA is cell-to-cell mobile.                                                                                                                       | 1496.85 | 19.23  | 77.82  | < 1e-07  | < 1e-07  |
| 3962 | 7 | F2-3 vs. S2-3 | 248714_at               | AT5G48140 | Pectin lyase-like superfamily protein;(source:Araport11)                                                                                                                                                                                                                                          | 721.95  | 9.31   | 77.52  | < 1e-07  | < 1e-07  |
| 3963 | 7 | F2-3 vs. S2-3 | 244959_s_a              | AT2G07708 | hypothetical protein;(source:Araport11)                                                                                                                                                                                                                                                           | 1620.53 | 21.09  | 76.82  | < 1e-07  | 2.96E-06 |
| 3964 | 7 | F2-3 vs. S2-3 | 253226_at               | AT4G35010 | putative beta-galactosidase (BGAL11 gene)                                                                                                                                                                                                                                                         | 922.82  | 12.75  | 72.39  | < 1e-07  | < 1e-07  |
| 3965 | 7 | F2-3 vs. S2-3 | 246687_at               | AT5G33370 | GDSL-motif esterase/acyltransferase/lipase. Enzyme group with broad substrate specificity that may catalyze acyltransfer or hydrolase reactions with lipid and non-lipid substrates. Mutants are defective in cuticle formation with reduced sepal cuticle ridge formation.                       | 1549.18 | 22.67  | 68.32  | < 1e-07  | < 1e-07  |
| 3966 | 7 | F2-3 vs. S2-3 | 261943_at               | AT1G80660 | H[+]-ATPase 9;(source:Araport11)                                                                                                                                                                                                                                                                  | 960.07  | 15.64  | 61.37  | < 1e-07  | < 1e-07  |
| 3967 | 7 | F2-3 vs. S2-3 | 265552_at               | AT2G07560 | H[+]-ATPase 6;(source:Araport11)                                                                                                                                                                                                                                                                  | 820.33  | 14.08  | 58.24  | < 1e-07  | < 1e-07  |
| 3968 | 7 | F2-3 vs. S2-3 | 252820_at               | AT3G42640 | H[+]-ATPase 8;(source:Araport11)                                                                                                                                                                                                                                                                  | 3348.06 | 61.95  | 54.05  | < 1e-07  | < 1e-07  |
| 3969 | 7 | F2-3 vs. S2-3 | 256955_at               | AT3G13390 | SKU5 similar 11;(source:Araport11)                                                                                                                                                                                                                                                                | 578.38  | 11.11  | 52.04  | < 1e-07  | < 1e-07  |
| 3970 | 7 | F2-3 vs. S2-3 | 260888_at               | AT1G29140 | Pollen Ole e 1 allergen and extensin family protein;(source:Araport11)                                                                                                                                                                                                                            | 496.37  | 9.91   | 50.07  | < 1e-07  | < 1e-07  |
| 3971 | 7 | F2-3 vs. S2-3 | 266743_at               | AT2G02990 | Encodes a member of the ribonuclease T2 family that responds to inorganic phosphate starvation, and inhibits production of anthocyanin. Also involved in wound-induced signaling independent of jasmonic acid. Its expression is responsive to both phosphate (Pi) and phosphite (Phi) in roots.  | 966.2   | 19.82  | 48.75  | < 1e-07  | < 1e-07  |
| 3972 | 7 | F2-3 vs. S2-3 | 248367_at               | AT5G52360 | ADF10 is an actin-depolymerizing factor that preferentially binds ADP-G-actin and inhibits G-actin nucleotide exchange. ADF10 promotes actin turnover in pollen , regulating organization of actin filaments and vesicle trafficking during pollen tube growth.                                   | 696.87  | 14.66  | 47.55  | < 1e-07  | < 1e-07  |
| 3973 | 7 | F2-3 vs. S2-3 | 265080_at               | AT1G55570 | SKU5 similar 12;(source:Araport11)                                                                                                                                                                                                                                                                | 649.82  | 14.37  | 45.21  | < 1e-07  | < 1e-07  |
| 3974 | 7 | F2-3 vs. S2-3 | 244964_at               | ATCG00560 | PSII L protein                                                                                                                                                                                                                                                                                    | 10363.9 | 250.76 | 41.33  | 6.00E-07 | 1.10E-05 |
| 3975 | 7 | F2-3 vs. S2-3 | 245026_at               | ATCG00140 | ATPase III subunit                                                                                                                                                                                                                                                                                | 2135.9  | 54.19  | 39.41  | < 1e-07  | < 1e-07  |
| 3976 | 7 | F2-3 vs. S2-3 | 254716_at               | AT4G13560 | Late embryogenesis abundant protein (LEA) family protein;(source:Araport11)                                                                                                                                                                                                                       | 450.49  | 12.34  | 36.51  | < 1e-07  | < 1e-07  |
| 3977 | 7 | F2-3 vs. S2-3 | 246545_at               | AT5G15110 | Pectate lyase family protein;(source:Araport11)                                                                                                                                                                                                                                                   | 414.89  | 11.45  | 36.23  | < 1e-07  | < 1e-07  |
| 3978 | 7 | F2-3 vs. S2-3 | 245275_at               | AT4G15210 | cytosolic beta-amylase expressed in rosette leaves and inducible by sugar. RAM1 mutants have reduced beta amylase in leaves and stems.                                                                                                                                                            | 1023.96 | 32.89  | 31.14  | < 1e-07  | < 1e-07  |
| 3979 | 7 | F2-3 vs. S2-3 | 258639_at               | AT3G07820 | Pectin lyase-like superfamily protein;(source:Araport11)                                                                                                                                                                                                                                          | 262.04  | 8.95   | 29.26  | < 1e-07  | < 1e-07  |
| 3980 | 7 | F2-3 vs. S2-3 | 246072_at               | AT5G20240 | Floral homeotic gene encoding a MADS domain transcription factor. Required for the specification of petal and stamen identities.                                                                                                                                                                  | 329.85  | 11.32  | 29.13  | < 1e-07  | < 1e-07  |
| 3981 | 7 | F2-3 vs. S2-3 | 257641_s_a              | AT3G25760 | encodes allene oxide cyclase. One of four genes in Arabidopsis that encode this enzyme, which catalyzes an essential step in jasmonic acid biosynthesis. Gene expression is induced during senescence, a process that involves jasmonic acid signalling pathway. The mRNA is cell-to-cell mobile. | 2445.4  | 87.9   | 27.82  | 8.00E-07 | 1.32E-05 |
| 3982 | 7 | F2-3 vs. S2-3 | 247537_s_a              | AT5G61690 | ABC2 homolog 15;(source:Araport11)                                                                                                                                                                                                                                                                | 481.74  | 17.57  | 27.41  | < 1e-07  | < 1e-07  |
| 3983 | 7 | F2-3 vs. S2-3 | 254104_at               | AT4G25040 | Uncharacterized protein family (UPF0497);(source:Araport11)                                                                                                                                                                                                                                       | 526     | 19.38  | 27.14  | < 1e-07  | < 1e-07  |
| 3984 | 7 | F2-3 vs. S2-3 | 262760_at               | AT1G10770 | Encodes a putative pectin methylesterase/invertase inhibitor. Anti-sense reduction of this gene's transcript results in pollen tube growth retardation and then partial male sterility and reduced seed set.                                                                                      | 568.18  | 21.2   | 26.81  | < 1e-07  | < 1e-07  |
| 3985 | 7 | F2-3 vs. S2-3 | 258686_at               | AT3G07840 | Pectin lyase-like superfamily protein;(source:Araport11)                                                                                                                                                                                                                                          | 395.79  | 15.78  | 25.08  | < 1e-07  | < 1e-07  |

|      |   |               |            |           |                                                                                                                                                                                                                                                                                                                                                                                                                                                                                                                                                                                                    |         |       |       |          |          |
|------|---|---------------|------------|-----------|----------------------------------------------------------------------------------------------------------------------------------------------------------------------------------------------------------------------------------------------------------------------------------------------------------------------------------------------------------------------------------------------------------------------------------------------------------------------------------------------------------------------------------------------------------------------------------------------------|---------|-------|-------|----------|----------|
| 3986 | 7 | F2-3 vs. S2-3 | 248622_at  | AT5G49360 | Encodes a bifunctional {beta}-D-xylosidase/{alpha}-L-arabinofuranosidase required for pectic arabinan modification. Located in the extracellular matrix. Gene is expressed specifically in tissues undergoing secondary wall thickening. This is a member of glycosyl hydrolase family 3 and has six other closely related members.                                                                                                                                                                                                                                                                | 891.76  | 38.51 | 23.16 | < 1e-07  | < 1e-07  |
| 3987 | 7 | F2-3 vs. S2-3 | 258005_at  | AT3G19390 | Granulin repeat cysteine protease family protein;(source:Araport11)                                                                                                                                                                                                                                                                                                                                                                                                                                                                                                                                | 850.16  | 37.88 | 22.44 | < 1e-07  | < 1e-07  |
| 3988 | 7 | F2-3 vs. S2-3 | 253725_at  | AT4G29340 | Profilin is a low-molecular weight, actin monomer-binding protein that regulates the organization of actin cytoskeleton in eukaryotes, including higher plants. PRF4 and PRF5 are late pollen-specific and are not detectable in other cell types of the plant body including microspores and root hairs. Immunocytochemical studies at the subcellular level reveal that both the constitutive and pollen-specific profilins are abundant in the cytoplasm. In vegetative cell types, such as root apical cells, profilins showed localization to nuclei in addition to the cytoplasmic staining. | 423.88  | 19.48 | 21.76 | < 1e-07  | < 1e-07  |
| 3989 | 7 | F2-3 vs. S2-3 | 245011_at  | ATCG00430 | Encodes a protein which was originally thought to be part of photosystem II but its wheat homolog was later shown to encode for subunit K of NADH dehydrogenase.                                                                                                                                                                                                                                                                                                                                                                                                                                   | 416.5   | 19.76 | 21.07 | < 1e-07  | < 1e-07  |
| 3990 | 7 | F2-3 vs. S2-3 | 256638_at  | AT3G19090 | RNA-binding protein;(source:Araport11)                                                                                                                                                                                                                                                                                                                                                                                                                                                                                                                                                             | 823.49  | 39.11 | 21.05 | < 1e-07  | < 1e-07  |
| 3991 | 7 | F2-3 vs. S2-3 | 251733_at  | AT3G56240 | CCH protein belongs to a family of eukaryotic proteins that participate in intracellular copper homeostasis by delivering this metal to the secretory pathway; mainly located along the vascular bundles of senescing leaves and petioles as well as in stem sieve elements; hypothesized to have a role in copper mobilization from decaying organs towards reproductive structures, as a result of metalloprotein breakdown. The plant-specific C-terminal domain of the CCH protein forms amyloid-like fibrils in vitro.                                                                        | 1952.99 | 93.94 | 20.79 | < 1e-07  | 2.96E-06 |
| 3992 | 7 | F2-3 vs. S2-3 | 252607_at  | AT3G44990 | Encodes a xyloglucan endotransglycosylase/hydrolase. Protein sequence and phylogenetic analysis indicates that this enzyme resides in Group III-A of the XTH family, with high similarity to Tropaeolum majus (nasturtium) xyloglucanase 1 (TmNXG1).Enzyme kinetic analysis indicates predominant xyloglucan endo-hydrolase activity (EC 3.2.1.151) with only limited potential to act as a xyloglucan endo-transglycosylase (EC 2.4.1.207).                                                                                                                                                       | 216.47  | 10.49 | 20.64 | < 1e-07  | < 1e-07  |
| 3993 | 7 | F2-3 vs. S2-3 | 252606_at  | AT3G45010 | serine carboxypeptidase-like 48;(source:Araport11)                                                                                                                                                                                                                                                                                                                                                                                                                                                                                                                                                 | 695.23  | 35.26 | 19.72 | < 1e-07  | < 1e-07  |
| 3994 | 7 | F2-3 vs. S2-3 | 267476_at  | AT2G02720 | Pectate lyase family protein;(source:Araport11)                                                                                                                                                                                                                                                                                                                                                                                                                                                                                                                                                    | 202.12  | 10.45 | 19.34 | < 1e-07  | < 1e-07  |
| 3995 | 7 | F2-3 vs. S2-3 | 249939_at  | AT5G22430 | Pollen Ole e 1 allergen and extensin family protein;(source:Araport11)                                                                                                                                                                                                                                                                                                                                                                                                                                                                                                                             | 240.85  | 12.64 | 19.06 | < 1e-07  | < 1e-07  |
| 3996 | 7 | F2-3 vs. S2-3 | 262463_at  | AT1G50310 | Sucrose transporter, expressed in pollen tubes.                                                                                                                                                                                                                                                                                                                                                                                                                                                                                                                                                    | 394.22  | 20.78 | 18.97 | < 1e-07  | < 1e-07  |
| 3997 | 7 | F2-3 vs. S2-3 | 265929_s_a | AT2G18570 | UDP-Glycosyltransferase superfamily protein;(source:Araport11)                                                                                                                                                                                                                                                                                                                                                                                                                                                                                                                                     | 247.83  | 13.22 | 18.74 | < 1e-07  | < 1e-07  |
| 3998 | 7 | F2-3 vs. S2-3 | 251590_at  | AT3G57690 | Encodes a putative arabinogalactan-protein (AGP23).                                                                                                                                                                                                                                                                                                                                                                                                                                                                                                                                                | 5965.4  | 318.7 | 18.72 | < 1e-07  | < 1e-07  |
| 3999 | 7 | F2-3 vs. S2-3 | 245232_at  | AT4G25590 | actin depolymerizing factor 7;(source:Araport11)                                                                                                                                                                                                                                                                                                                                                                                                                                                                                                                                                   | 188.13  | 10.07 | 18.67 | < 1e-07  | < 1e-07  |
| 4000 | 7 | F2-3 vs. S2-3 | 249584_s_a | AT5G37810 | NOD26-like intrinsic protein 4;(source:Araport11)                                                                                                                                                                                                                                                                                                                                                                                                                                                                                                                                                  | 215.85  | 11.74 | 18.38 | < 1e-07  | < 1e-07  |
| 4001 | 7 | F2-3 vs. S2-3 | 248252_at  | AT5G53250 | arabinogalactan protein 22;(source:Araport11)                                                                                                                                                                                                                                                                                                                                                                                                                                                                                                                                                      | 972.32  | 53.11 | 18.31 | < 1e-07  | < 1e-07  |
| 4002 | 7 | F2-3 vs. S2-3 | 262664_at  | AT1G13970 | beta-hexosaminidase (DUF1336);(source:Araport11)                                                                                                                                                                                                                                                                                                                                                                                                                                                                                                                                                   | 174.18  | 9.72  | 17.92 | < 1e-07  | < 1e-07  |
| 4003 | 7 | F2-3 vs. S2-3 | 250349_at  | AT5G12000 | kinase with adenine nucleotide alpha hydrolases-like domain-containing protein;(source:Araport11)                                                                                                                                                                                                                                                                                                                                                                                                                                                                                                  | 193.02  | 10.78 | 17.9  | < 1e-07  | < 1e-07  |
| 4004 | 7 | F2-3 vs. S2-3 | 250631_at  | AT5G07430 | Pectin lyase-like superfamily protein;(source:Araport11)                                                                                                                                                                                                                                                                                                                                                                                                                                                                                                                                           | 232.23  | 13.22 | 17.56 | < 1e-07  | 2.96E-06 |
| 4005 | 7 | F2-3 vs. S2-3 | 258591_at  | AT3G04360 | Calcium-dependent lipid-binding (CaLB domain) family protein;(source:Araport11)                                                                                                                                                                                                                                                                                                                                                                                                                                                                                                                    | 258.45  | 14.74 | 17.54 | < 1e-07  | 2.96E-06 |
| 4006 | 7 | F2-3 vs. S2-3 | 266697_at  | AT2G19770 | Encodes profilin 5, originally named profilin 4 (PRO4/PFN4). Low-molecular weight, actin monomer-binding protein that regulates the organization of actin cytoskeleton. Pollen-specific plant profilin present predominantly in mature pollen and growing pollen tubes.                                                                                                                                                                                                                                                                                                                            | 302.64  | 17.88 | 16.93 | 1.10E-06 | 1.64E-05 |
| 4007 | 7 | F2-3 vs. S2-3 | 267607_s_a | AT2G26740 | Encodes a soluble epoxide hydrolase whose expression is induced by auxin and water stress.                                                                                                                                                                                                                                                                                                                                                                                                                                                                                                         | 221.61  | 13.14 | 16.87 | < 1e-07  | < 1e-07  |
| 4008 | 7 | F2-3 vs. S2-3 | 247538_at  | AT5G61700 | ABC2 homolog 16;(source:Araport11)                                                                                                                                                                                                                                                                                                                                                                                                                                                                                                                                                                 | 286.37  | 17.13 | 16.71 | < 1e-07  | < 1e-07  |
| 4009 | 7 | F2-3 vs. S2-3 | 260241_at  | AT1G63710 | Encodes a member of the CYP86A subfamily of cytochrome p450 genes. Expressed at highest level in mature stems and flowers.                                                                                                                                                                                                                                                                                                                                                                                                                                                                         | 158.73  | 9.59  | 16.55 | < 1e-07  | < 1e-07  |
| 4010 | 7 | F2-3 vs. S2-3 | 254283_s_a | AT4G22870 | 2-oxoglutarate (2OG) and Fe(II)-dependent oxygenase superfamily protein;(source:Araport11)                                                                                                                                                                                                                                                                                                                                                                                                                                                                                                         | 903.2   | 55.45 | 16.29 | 3.00E-07 | 6.68E-06 |
| 4011 | 7 | F2-3 vs. S2-3 | 255016_at  | AT4G10120 | Encodes a protein with putative sucrose-phosphate synthase activity.                                                                                                                                                                                                                                                                                                                                                                                                                                                                                                                               | 160.68  | 9.98  | 16.11 | < 1e-07  | < 1e-07  |
| 4012 | 7 | F2-3 vs. S2-3 | 260997_at  | AT1G26610 | C2H2-like zinc finger protein;(source:Araport11)                                                                                                                                                                                                                                                                                                                                                                                                                                                                                                                                                   | 379.73  | 24.1  | 15.76 | < 1e-07  | < 1e-07  |

|      |   |               |            |           |                                                                                                                                                                                                                                                                                                                                                                                                     |         |        |       |          |          |
|------|---|---------------|------------|-----------|-----------------------------------------------------------------------------------------------------------------------------------------------------------------------------------------------------------------------------------------------------------------------------------------------------------------------------------------------------------------------------------------------------|---------|--------|-------|----------|----------|
| 4013 | 7 | F2-3 vs. S2-3 | 266918_at  | AT2G45800 | Encodes a member of the Arabidopsis LIM proteins: a family of actin bundlers with distinct expression patterns. WLIM1, WLIM2a, and WLIM2b are widely expressed, whereas PLIM2a, PLIM2b, and PLIM2c are predominantly expressed in pollen. Regulates actin cytoskeleton organization.                                                                                                                | 200.98  | 12.78  | 15.72 | < 1e-07  | < 1e-07  |
| 4014 | 7 | F2-3 vs. S2-3 | 254024_at  | AT4G25780 | CAP (Cysteine-rich secretory proteins, Antigen 5, and Pathogenesis-related 1 protein) superfamily protein;(source:Araport11)                                                                                                                                                                                                                                                                        | 482.46  | 31.04  | 15.54 | 3.00E-07 | 6.68E-06 |
| 4015 | 7 | F2-3 vs. S2-3 | 249996_at  | AT5G18600 | Encodes a member of the CC-type glutaredoxin (ROXY) family that has been shown to interact with the transcription factor TGA2 and suppress ORA59 promoter activity.                                                                                                                                                                                                                                 | 205.11  | 13.23  | 15.5  | 4.00E-07 | 8.26E-06 |
| 4016 | 7 | F2-3 vs. S2-3 | 259161_at  | AT3G01500 | Encodes a putative beta-carbonic anhydrase betaCA1. Together with betaCA4 (At1g70410) regulates CO2-controlled stomatal movements in guard cells, as well as attenuates immunity. Differential CA gene expression in response to changing atmospheric CO2 conditions contribute to altered disease resistance levels. Activated by OXS2 under the treatment of salt.                                | 312.24  | 20.57  | 15.18 | < 1e-07  | < 1e-07  |
| 4017 | 7 | F2-3 vs. S2-3 | 245701_at  | AT5G04140 | Encodes a gene whose sequence is similar to ferredoxin dependent glutamate synthase (Fd-GOGAT). Expression in leaves is induced by light and sucrose. Proposed to be involved in photorespiration and nitrogen assimilation. The mRNA is cell-to-cell mobile.                                                                                                                                       | 209.67  | 14.05  | 14.93 | < 1e-07  | < 1e-07  |
| 4018 | 7 | F2-3 vs. S2-3 | 257173_at  | AT3G23810 | S-adenosyl-L-homocysteine (SAH) hydrolase 2;(source:Araport11)                                                                                                                                                                                                                                                                                                                                      | 4516.75 | 310.93 | 14.53 | < 1e-07  | < 1e-07  |
| 4019 | 7 | F2-3 vs. S2-3 | 264208_at  | AT1G22760 | Putative poly(A) binding protein May there fore function in posttranscriptional regulation, including mRNA turnover and translational initiation. Expression detected only in floral organs.                                                                                                                                                                                                        | 239.94  | 16.94  | 14.17 | < 1e-07  | < 1e-07  |
| 4020 | 7 | F2-3 vs. S2-3 | 252140_at  | AT3G51070 | S-adenosyl-L-methionine-dependent methyltransferases superfamily protein;(source:Araport11)                                                                                                                                                                                                                                                                                                         | 178     | 12.78  | 13.93 | < 1e-07  | < 1e-07  |
| 4021 | 7 | F2-3 vs. S2-3 | 262717_s_a | AT1G16410 | member of CYP79F The mRNA is cell-to-cell mobile. encodes a microbody NAD-dependent malate dehydrogenase encodes an peroxisomal NAD-malate dehydrogenase that is involved in fatty acid beta-oxidation through providing NAD to the process of converting fatty acyl CoA to acetyl CoA.                                                                                                             | 141.39  | 10.21  | 13.85 | < 1e-07  | < 1e-07  |
| 4022 | 7 | F2-3 vs. S2-3 | 250498_at  | AT5G09660 | Related to Cys2/His2-type zinc-finger proteins found in higher plants. Compensated for a subset of calcineurin deficiency in yeast. Salt tolerance produced by ZAT10 appeared to be partially dependent on ENA1/PMR2, a P-type ATPase required for Li+ and Na+ efflux in yeast. The protein is localized to the nucleus, acts as a transcriptional repressor and is responsive to chitin oligomers. | 301.81  | 21.91  | 13.77 | 1.30E-06 | 1.81E-05 |
| 4023 | 7 | F2-3 vs. S2-3 | 261648_at  | AT1G27730 | Also involved in response to photooxidative stress.                                                                                                                                                                                                                                                                                                                                                 | 388.48  | 28.8   | 13.49 | 2.00E-07 | 4.97E-06 |
| 4024 | 7 | F2-3 vs. S2-3 | 245465_at  | AT4G16590 | encodes a gene similar to cellulose synthase                                                                                                                                                                                                                                                                                                                                                        | 248.69  | 19.01  | 13.08 | < 1e-07  | < 1e-07  |
| 4025 | 7 | F2-3 vs. S2-3 | 249375_at  | AT5G40730 | Encodes an arabinogalactan-protein (AGP24).                                                                                                                                                                                                                                                                                                                                                         | 1114.91 | 85.52  | 13.04 | 1.15E-05 | 8.34E-05 |
| 4026 | 7 | F2-3 vs. S2-3 | 255590_at  | AT4G01610 | Encodes a capase involved in stress induced cell death. Activity detected in leaf and cell culture.                                                                                                                                                                                                                                                                                                 | 5358.72 | 412.15 | 13    | < 1e-07  | < 1e-07  |
| 4027 | 7 | F2-3 vs. S2-3 | 261970_at  | AT1G65960 | glutamate decarboxylase (GAD2)The mRNA is cell-to-cell mobile.                                                                                                                                                                                                                                                                                                                                      | 3140.23 | 246.14 | 12.76 | 1.70E-06 | 2.21E-05 |
| 4028 | 7 | F2-3 vs. S2-3 | 260693_at  | AT1G32450 | Transmembrane nitrate transporter. Involved in xylem transport of nitrate from root to shoot. Induced in response to high and low concentrations of nitrate. Not involved in nitrate uptake. Expressed in root pericycle cells under the control of MYB59. Also functions as a proton-coupled H+/K+ antiporter for K+ loading into the xylem.                                                       | 460.65  | 36.25  | 12.71 | < 1e-07  | 2.96E-06 |
| 4029 | 7 | F2-3 vs. S2-3 | 259372_at  | AT1G69120 | Floral homeotic gene encoding a MADS domain protein homologous to SRF transcription factors. Specifies floral meristem and sepal identity. Required for the transcriptional activation of AGAMOUS. Interacts with LEAFY.Binds to promoter and regulates the expression of flowering time genes SVP, SOC1 and AGL24.                                                                                 | 165.34  | 13.1   | 12.62 | < 1e-07  | < 1e-07  |
| 4030 | 7 | F2-3 vs. S2-3 | 245047_at  | ATCG00020 | Encodes chlorophyll binding protein D1, a part of the photosystem II reaction center core                                                                                                                                                                                                                                                                                                           | 498.19  | 39.89  | 12.49 | 5.79E-05 | 2.63E-04 |
| 4031 | 7 | F2-3 vs. S2-3 | 253099_s_a | AT4G37530 | Peroxidase superfamily protein;(source:Araport11)                                                                                                                                                                                                                                                                                                                                                   | 163.68  | 13.34  | 12.27 | < 1e-07  | < 1e-07  |
| 4032 | 7 | F2-3 vs. S2-3 | 252863_at  | AT4G39800 | ** Referred to as MIPS2 in Mitsuhashi et al 2008. myo-inositol-1-phosphate synthase isoform 1.Expressed in leaf, root and silique. Immunolocalization experiments with an antibody recognizing MIPS1, MIPS2, and MIPS3 showed endosperm localization.                                                                                                                                               | 877.18  | 71.75  | 12.23 | < 1e-07  | < 1e-07  |
| 4033 | 7 | F2-3 vs. S2-3 | 258158_at  | AT3G17790 | Expression is upregulated in the shoot of cax1/cax3 mutant and is responsive to phosphate (Pi) and not phosphite (Phi) in roots and shoots.                                                                                                                                                                                                                                                         | 254.33  | 21.01  | 12.1  | < 1e-07  | < 1e-07  |

|      |   |               |                 |           |                                                                                                                                                                                                                                                                                                                                                                                                                   |         |        |       |          |          |
|------|---|---------------|-----------------|-----------|-------------------------------------------------------------------------------------------------------------------------------------------------------------------------------------------------------------------------------------------------------------------------------------------------------------------------------------------------------------------------------------------------------------------|---------|--------|-------|----------|----------|
| 4034 | 7 | F2-3 vs. S2-3 | 266834_s_a<br>t | AT2G30020 | Encodes AP2C1. Belongs to the clade B of the PP2C-superfamily. Acts as a MAPK phosphatase that negatively regulates MPK4 and MPK6.                                                                                                                                                                                                                                                                                | 3797.12 | 314.03 | 12.09 | 1.82E-05 | 1.13E-04 |
| 4035 | 7 | F2-3 vs. S2-3 | 251658_at       | AT3G57020 | Calcium-dependent phosphotriesterase superfamily protein;(source:Araport11)                                                                                                                                                                                                                                                                                                                                       | 212.7   | 17.69  | 12.03 | < 1e-07  | < 1e-07  |
| 4036 | 7 | F2-3 vs. S2-3 | 246908_at       | AT5G25610 | responsive to dehydration 22 (RD22) mediated by ABA                                                                                                                                                                                                                                                                                                                                                               | 1650.56 | 138.69 | 11.9  | < 1e-07  | < 1e-07  |
| 4037 | 7 | F2-3 vs. S2-3 | 258321_at       | AT3G22840 | Encodes an early light-inducible protein.<br>Class III peroxidase Perx33. Expressed in roots. Located in the cell wall. Involved in cell elongation. Expression activated by light. May play a role in generating H2O2 during defense response. The mRNA is cell-to-cell mobile.                                                                                                                                  | 313.75  | 26.88  | 11.67 | < 1e-07  | < 1e-07  |
| 4038 | 7 | F2-3 vs. S2-3 | 252291_s_a<br>t | AT3G49110 | Member of a diversely expressed predicted peptide family showing sequence similarity to tobacco Rapid Alkalinization Factor (RALF), and is believed to play an essential role in the physiology of Arabidopsis. Consists of a single exon and is characterized by a conserved C-terminal motif and N-terminal signal peptide. RALF4 and RALF19 act redundantly in the pollen tube to regulate pollen tube growth. | 103.45  | 9.07   | 11.41 | 1.30E-06 | 1.81E-05 |
| 4039 | 7 | F2-3 vs. S2-3 | 245658_at       | AT1G28270 | Encodes a member of a gene family homologous to mammalian SNAP25, a type of SNARE proteins with two chains. There are three members in Arabidopsis: SNAP30, SNAP29, and SNAP33.                                                                                                                                                                                                                                   | 111.12  | 9.79   | 11.35 | 2.00E-07 | 4.97E-06 |
| 4040 | 7 | F2-3 vs. S2-3 | 259451_at       | AT1G13890 | Plant invertase/pectin methylesterase inhibitor superfamily protein;(source:Araport11)                                                                                                                                                                                                                                                                                                                            | 104.68  | 9.59   | 10.92 | 1.30E-06 | 1.81E-05 |
| 4041 | 7 | F2-3 vs. S2-3 | 266764_at       | AT2G47050 | Glucosylceramidase that preferentially hydrolyzes long acyl chain glucosylceramides. Encodes glutathione transferase belonging to the tau class of GSTs. Naming convention according to Wagner et al. (2002).                                                                                                                                                                                                     | 134.01  | 12.27  | 10.92 | 6.00E-07 | 1.10E-05 |
| 4042 | 7 | F2-3 vs. S2-3 | 255008_at       | AT4G10060 | senescence-associated family protein, putative (DUF581);(source:Araport11)                                                                                                                                                                                                                                                                                                                                        | 179.24  | 16.83  | 10.65 | < 1e-07  | < 1e-07  |
| 4043 | 7 | F2-3 vs. S2-3 | 260745_at       | AT1G78370 | RHOMBOID-like protein 5;(source:Araport11)                                                                                                                                                                                                                                                                                                                                                                        | 192.04  | 18.08  | 10.62 | 3.00E-07 | 6.68E-06 |
| 4044 | 7 | F2-3 vs. S2-3 | 245993_at       | AT5G20700 | SAUR-like auxin-responsive protein family;(source:Araport11)                                                                                                                                                                                                                                                                                                                                                      | 580.58  | 55.33  | 10.49 | < 1e-07  | < 1e-07  |
| 4045 | 7 | F2-3 vs. S2-3 | 262146_at       | AT1G52580 | Plant self-incompatibility protein S1 family;(source:Araport11)                                                                                                                                                                                                                                                                                                                                                   | 141.47  | 13.65  | 10.36 | < 1e-07  | < 1e-07  |
| 4046 | 7 | F2-3 vs. S2-3 | 252733_at       | AT3G43120 | hypothetical protein;(source:Araport11)                                                                                                                                                                                                                                                                                                                                                                           | 118.8   | 11.51  | 10.32 | 1.00E-07 | 2.96E-06 |
| 4047 | 7 | F2-3 vs. S2-3 | 246878_at       | AT5G26060 | encodes a exopolygalacturonase.                                                                                                                                                                                                                                                                                                                                                                                   | 153.75  | 14.9   | 10.32 | < 1e-07  | < 1e-07  |
| 4048 | 7 | F2-3 vs. S2-3 | 247882_at       | AT5G57785 | kinase with adenine nucleotide alpha hydrolases-like domain-containing protein;(source:Araport11)                                                                                                                                                                                                                                                                                                                 | 283.06  | 27.46  | 10.31 | 1.60E-06 | 2.10E-05 |
| 4049 | 7 | F2-3 vs. S2-3 | 262122_at       | AT1G02790 | Encodes a protein predicted to have dihydropyrimidine dehydrogenase activity. Its activity has not been demonstrated in vivo, but, it is required for efficient uracil catabolism in Arabidopsis. It localizes to the plastid.                                                                                                                                                                                    | 121.69  | 11.85  | 10.27 | 2.50E-06 | 2.85E-05 |
| 4050 | 7 | F2-3 vs. S2-3 | 265405_at       | AT2G16750 | member of Calcium Dependent Protein Kinase                                                                                                                                                                                                                                                                                                                                                                        | 244.53  | 23.82  | 10.27 | 2.00E-07 | 4.97E-06 |
| 4051 | 7 | F2-3 vs. S2-3 | 258162_at       | AT3G17810 | bifunctional sn-glycerol-3-phosphate 2-O-acyltransferase/phosphatase. Involved in cutin assembly.                                                                                                                                                                                                                                                                                                                 | 577.71  | 56.31  | 10.26 | < 1e-07  | < 1e-07  |
| 4052 | 7 | F2-3 vs. S2-3 | 263450_at       | AT2G31500 | Monomeric G protein. Expressed in root epidermal cells that are destined to become atrichoblasts. Also expressed during pollen development and in the pollen tube tip.                                                                                                                                                                                                                                            | 124.91  | 12.19  | 10.25 | < 1e-07  | < 1e-07  |
| 4053 | 7 | F2-3 vs. S2-3 | 267144_at       | AT2G38110 | EXS (ERD1/XPR1/SYG1) family protein;(source:Araport11)                                                                                                                                                                                                                                                                                                                                                            | 285.16  | 27.98  | 10.19 | < 1e-07  | < 1e-07  |
| 4054 | 7 | F2-3 vs. S2-3 | 257951_at       | AT3G21700 | Sucrose-6F-phosphate phosphohydrolase family protein;(source:Araport11)                                                                                                                                                                                                                                                                                                                                           | 244.43  | 24.06  | 10.16 | < 1e-07  | < 1e-07  |
| 4055 | 7 | F2-3 vs. S2-3 | 257106_at       | AT3G29060 | Encodes the cytochrome b(6) subunit of the cytochrome b6f complex.                                                                                                                                                                                                                                                                                                                                                | 170.44  | 16.86  | 10.11 | < 1e-07  | < 1e-07  |
| 4056 | 7 | F2-3 vs. S2-3 | 263954_at       | AT2G35840 | Senescence-associated gene 12 (SAG12) encoding a cysteine protease influenced by cytokinin, auxin, and sugars.Localized to special vacuole found during senescence called senescence associated vacuoles which are different from central vacuole in the tonoplast composition and pH.                                                                                                                            | 825.38  | 81.95  | 10.07 | < 1e-07  | < 1e-07  |
| 4057 | 7 | F2-3 vs. S2-3 | 244976_at       | ATCG00720 | encodes delta 1-pyrroline-5-carboxylate synthetase B. Gene expression is induced by dehydration, high salt and ABA. Knock-out mutations in P5CS2 are embryo-lethal. P5CS2 appears to be present in different cells and/or different subcellular locations from P5CS1 in a tissue-dependent manner.                                                                                                                | 717.56  | 71.27  | 10.07 | 1.00E-07 | 2.96E-06 |
| 4058 | 7 | F2-3 vs. S2-3 | 248918_at       | AT5G45890 | Mutants are defective in pollen development.                                                                                                                                                                                                                                                                                                                                                                      | 133.13  | 13.33  | 9.99  | 7.00E-07 | 1.20E-05 |
| 4059 | 7 | F2-3 vs. S2-3 | 251775_s_a<br>t | AT3G55610 | pyridoxal-phosphate-dependent serine hydroxymethyltransferase, putative (DUF632);(source:Araport11)                                                                                                                                                                                                                                                                                                               | 722.75  | 72.52  | 9.97  | 1.65E-05 | 1.06E-04 |
| 4060 | 7 | F2-3 vs. S2-3 | 252101_at       | AT3G51290 |                                                                                                                                                                                                                                                                                                                                                                                                                   | 920.65  | 96.36  | 9.55  | < 1e-07  | < 1e-07  |

|      |   |               |           |           |                                                                                                                                                                                                                                                                                                                                                                                                                                                                                                                                      |         |        |      |          |          |
|------|---|---------------|-----------|-----------|--------------------------------------------------------------------------------------------------------------------------------------------------------------------------------------------------------------------------------------------------------------------------------------------------------------------------------------------------------------------------------------------------------------------------------------------------------------------------------------------------------------------------------------|---------|--------|------|----------|----------|
| 4061 | 7 | F2-3 vs. S2-3 | 265182_at | AT1G23740 | AOR is an alkenal/one oxidoreductase that acts on compounds with unsaturated alpha,beta-carbonyls. The activity of this enzyme with a number of substrates, including acrolein and 3-buten-2-one, was demonstrated in vitro using a truncated form of the protein that lacked approximately 80 of the first amino acids. This protein appears to localize to the chloroplast where it likely helps to maintain the photosynthetic process by detoxifying reactive carbonyls formed during lipid peroxidation.                        | 414.63  | 43.57  | 9.52 | < 1e-07  | < 1e-07  |
| 4062 | 7 | F2-3 vs. S2-3 | 257816_at | AT3G25140 | Quasimodo1, encodes a glycosyltransferase, involved in homogalacturonan biosynthesis; mutant shows cell adhesion defect and lower wall uronic acid content. The mRNA is cell-to-cell mobile. Encodes a high affinity H+:<i>myo</i>-inositol symporter. The only other compound shown to be transported was pinitol, a methylated derivative of <i>myo</i>-inositol. The mRNA is cell-to-cell mobile.                                                                                                                                 | 364.7   | 38.69  | 9.43 | < 1e-07  | 2.96E-06 |
| 4063 | 7 | F2-3 vs. S2-3 | 245499_at | AT4G16480 | phosphatidylinositol 4-kinase gamma-like protein;(source:Araport11)                                                                                                                                                                                                                                                                                                                                                                                                                                                                  | 469.36  | 49.91  | 9.4  | < 1e-07  | < 1e-07  |
| 4064 | 7 | F2-3 vs. S2-3 | 251697_at | AT3G56600 |                                                                                                                                                                                                                                                                                                                                                                                                                                                                                                                                      | 145.19  | 15.85  | 9.16 | < 1e-07  | < 1e-07  |
| 4065 | 7 | F2-3 vs. S2-3 | 264139_at | AT1G78940 | kinase with adenine nucleotide alpha hydrolases-like domain-containing protein;(source:Araport11)                                                                                                                                                                                                                                                                                                                                                                                                                                    | 121.31  | 13.34  | 9.09 | 1.40E-06 | 1.89E-05 |
| 4066 | 7 | F2-3 vs. S2-3 | 250514_at | AT5G09550 | GDP dissociation inhibitor family protein / Rab GTPase activator family protein;(source:Araport11)                                                                                                                                                                                                                                                                                                                                                                                                                                   | 161.55  | 17.83  | 9.06 | < 1e-07  | < 1e-07  |
| 4067 | 7 | F2-3 vs. S2-3 | 267181_at | AT2G37760 | Encodes an NADPH-dependent aldo-keto reductase that can act on a wide variety of substrates in vitro including aliphatic and aromatic aldehydes and steroids. Transcript levels for this gene are up-regulated in response to cold, salt, and drought stress.<br>ortholog of sugar beet HS1 PRO-1 2;(source:Araport11)<br>Pectin lyase-like superfamily protein;(source:Araport11)<br>Protein is tyrosine-phosphorylated and its phosphorylation state is modulated in response to ABA in Arabidopsis thaliana seeds.                | 213.55  | 23.86  | 8.95 | < 1e-07  | 2.96E-06 |
| 4068 | 7 | F2-3 vs. S2-3 | 267357_at | AT2G40000 |                                                                                                                                                                                                                                                                                                                                                                                                                                                                                                                                      | 200.57  | 22.44  | 8.94 | < 1e-07  | < 1e-07  |
| 4069 | 7 | F2-3 vs. S2-3 | 247377_at | AT5G63180 |                                                                                                                                                                                                                                                                                                                                                                                                                                                                                                                                      | 197.4   | 22.25  | 8.87 | < 1e-07  | < 1e-07  |
| 4070 | 7 | F2-3 vs. S2-3 | 252929_at | AT4G38970 |                                                                                                                                                                                                                                                                                                                                                                                                                                                                                                                                      | 2992.59 | 339.55 | 8.81 | < 1e-07  | < 1e-07  |
| 4071 | 7 | F2-3 vs. S2-3 | 267322_at | AT2G19330 | Encodes PIRL6, a member of the Plant Intracellular Ras-group-related LRRs (Leucine rich repeat proteins). PIRLs are a distinct, plant-specific class of intracellular LRRs that likely mediate protein interactions, possibly in the context of signal transduction.<br>Pectin lyase-like superfamily protein;(source:Araport11)<br>hypothetical protein;(source:Araport11)                                                                                                                                                          | 150.97  | 17.43  | 8.66 | 5.00E-07 | 9.67E-06 |
| 4072 | 7 | F2-3 vs. S2-3 | 258685_at | AT3G07830 |                                                                                                                                                                                                                                                                                                                                                                                                                                                                                                                                      | 264.41  | 30.52  | 8.66 | 5.00E-07 | 9.67E-06 |
| 4073 | 7 | F2-3 vs. S2-3 | 267443_at | AT2G19000 |                                                                                                                                                                                                                                                                                                                                                                                                                                                                                                                                      | 110.98  | 12.87  | 8.63 | 3.00E-07 | 6.68E-06 |
| 4074 | 7 | F2-3 vs. S2-3 | 266115_at | AT2G02140 | Predicted to encode a PR (pathogenesis-related) protein. Belongs to the plant defensin (PDF) family with the following members: At1g75830/PDF1.1, At5g44420/PDF1.2a, At2g26020/PDF1.2b, At5g44430/PDF1.2c, At2g26010/PDF1.3, At1g19610/PDF1.4, At1g55010/PDF1.5, At2g02120/PDF2.1, At2g02100/PDF2.2, At2g02130/PDF2.3, At1g61070/PDF2.4, At5g63660/PDF2.5, At2g02140/PDF2.6, At5g38330/PDF3.1 and At4g30070/PDF3.2.                                                                                                                  | 154.75  | 18     | 8.6  | 3.00E-07 | 6.68E-06 |
| 4075 | 7 | F2-3 vs. S2-3 | 249614_at | AT5G37300 | Encodes a bifunctional enzyme, wax ester synthase (WS) and diacylglycerol acyltransferase (DGAT). In vitro assay indicated a ratio of 10.9 between its WS and DGAT activities. Both mutant and in vivo expression/analysis in yeast studies indicated a role in wax biosynthesis. Encodes the ATPase alpha subunit, which is a subunit of ATP synthase and part of the CF1 portion which catalyzes the conversion of ADP to ATP using the proton motive force. This complex is located in the thylakoid membrane of the chloroplast. | 244.53  | 28.61  | 8.55 | < 1e-07  | < 1e-07  |
| 4076 | 7 | F2-3 vs. S2-3 | 245024_at | ATCG00120 | Purple acid phosphatases superfamily protein;(source:Araport11)<br>Rubisco activase, a nuclear-encoded chloroplast protein that consists of two isoforms arising from alternative splicing in most plants. Required for the light activation of rubisco. Involved in jasmonate-induced leaf senescence.                                                                                                                                                                                                                              | 1892.86 | 221.57 | 8.54 | 4.00E-07 | 8.26E-06 |
| 4077 | 7 | F2-3 vs. S2-3 | 252004_at | AT3G52780 |                                                                                                                                                                                                                                                                                                                                                                                                                                                                                                                                      | 102.39  | 12.1   | 8.46 | < 1e-07  | < 1e-07  |
| 4078 | 7 | F2-3 vs. S2-3 | 245061_at | AT2G39730 |                                                                                                                                                                                                                                                                                                                                                                                                                                                                                                                                      | 1074.59 | 127.75 | 8.41 | < 1e-07  | < 1e-07  |
| 4079 | 7 | F2-3 vs. S2-3 | 254122_at | AT4G24510 | Encodes a component of the fatty acid elongation machinery required for C28 to C30 fatty acid elongation. It does not require the acyltransferase catalytic site for biological function.<br>Calcium-dependent lipid-binding (CaLB domain) family protein;(source:Araport11)                                                                                                                                                                                                                                                         | 146.65  | 17.5   | 8.38 | < 1e-07  | < 1e-07  |
| 4080 | 7 | F2-3 vs. S2-3 | 265368_at | AT2G13350 |                                                                                                                                                                                                                                                                                                                                                                                                                                                                                                                                      | 143.6   | 17.16  | 8.37 | 3.00E-07 | 6.68E-06 |
| 4081 | 7 | F2-3 vs. S2-3 | 258561_at | AT3G05960 | Encodes a hexose sugar transporter that is expressed in pollen. STP6 may play a role in providing sugars during late pollen maturation or pollen tube germination.<br>MATE efflux family protein;(source:Araport11)                                                                                                                                                                                                                                                                                                                  | 130.3   | 15.69  | 8.3  | 1.80E-06 | 2.29E-05 |
| 4082 | 7 | F2-3 vs. S2-3 | 248335_at | AT5G52450 |                                                                                                                                                                                                                                                                                                                                                                                                                                                                                                                                      | 240.88  | 29.37  | 8.2  | < 1e-07  | < 1e-07  |

|      |   |               |            |           |                                                                                                                                                                                                                                                                                                                                                                                                                                                                                                                                                                                                                                                                                                                                                                                                                                                                                                                                                                                                                                                             |         |        |      |          |          |
|------|---|---------------|------------|-----------|-------------------------------------------------------------------------------------------------------------------------------------------------------------------------------------------------------------------------------------------------------------------------------------------------------------------------------------------------------------------------------------------------------------------------------------------------------------------------------------------------------------------------------------------------------------------------------------------------------------------------------------------------------------------------------------------------------------------------------------------------------------------------------------------------------------------------------------------------------------------------------------------------------------------------------------------------------------------------------------------------------------------------------------------------------------|---------|--------|------|----------|----------|
| 4083 | 7 | F2-3 vs. S2-3 | 265002_at  | AT1G24400 | High-affinity transporter for neutral and acidic amino acids, expressed in tapetum tissue of anthers.                                                                                                                                                                                                                                                                                                                                                                                                                                                                                                                                                                                                                                                                                                                                                                                                                                                                                                                                                       | 106.1   | 13.19  | 8.04 | < 1e-07  | < 1e-07  |
| 4084 | 7 | F2-3 vs. S2-3 | 254123_at  | AT4G24640 | Transport of 1-Aminocyclopropane-1-carboxylic acid (ACC).                                                                                                                                                                                                                                                                                                                                                                                                                                                                                                                                                                                                                                                                                                                                                                                                                                                                                                                                                                                                   | 90.84   | 11.31  | 8.03 | 7.00E-07 | 1.20E-05 |
| 4085 | 7 | F2-3 vs. S2-3 | 254607_at  | AT4G18920 | Encodes AppB protein (AppB1).                                                                                                                                                                                                                                                                                                                                                                                                                                                                                                                                                                                                                                                                                                                                                                                                                                                                                                                                                                                                                               | 112.15  | 13.99  | 8.02 | 1.00E-07 | 2.96E-06 |
|      |   |               | 256008_s_a |           | histone acetyltransferase (DUF1264);(source:Araport11)                                                                                                                                                                                                                                                                                                                                                                                                                                                                                                                                                                                                                                                                                                                                                                                                                                                                                                                                                                                                      |         |        |      |          |          |
| 4086 | 7 | F2-3 vs. S2-3 | t          | AT1G34040 | Pyridoxal phosphate (PLP)-dependent transferases superfamily protein;(source:Araport11)                                                                                                                                                                                                                                                                                                                                                                                                                                                                                                                                                                                                                                                                                                                                                                                                                                                                                                                                                                     | 104.34  | 13.08  | 7.97 | 3.30E-06 | 3.44E-05 |
|      |   |               |            |           | Heavy metal associated domain containing protein involved in plant immunity.Mutants show an increase in root length under NO stress and reduction in root length under H2O2 stress conditions.                                                                                                                                                                                                                                                                                                                                                                                                                                                                                                                                                                                                                                                                                                                                                                                                                                                              |         |        |      |          |          |
| 4087 | 7 | F2-3 vs. S2-3 | 245749_at  | AT1G51090 | Mutants show increases in defense responses to pathogens including hypersensitive lesions, increased resistance and induction of SAR genes.                                                                                                                                                                                                                                                                                                                                                                                                                                                                                                                                                                                                                                                                                                                                                                                                                                                                                                                 | 167.92  | 21.27  | 7.9  | < 1e-07  | 2.96E-06 |
| 4088 | 7 | F2-3 vs. S2-3 | 256627_at  | AT3G19970 | alpha/beta-Hydrolases superfamily protein;(source:Araport11)                                                                                                                                                                                                                                                                                                                                                                                                                                                                                                                                                                                                                                                                                                                                                                                                                                                                                                                                                                                                | 295.7   | 37.49  | 7.89 | 2.30E-06 | 2.69E-05 |
|      |   |               |            |           | Encodes a protein with biochemical, structural, and biophysical characteristics of a NEET protein. It plays a key role in plant development, senescence, reactive oxygen homeostasis, and Fe metabolism.                                                                                                                                                                                                                                                                                                                                                                                                                                                                                                                                                                                                                                                                                                                                                                                                                                                    |         |        |      |          |          |
| 4089 | 7 | F2-3 vs. S2-3 | 248377_at  | AT5G51720 |                                                                                                                                                                                                                                                                                                                                                                                                                                                                                                                                                                                                                                                                                                                                                                                                                                                                                                                                                                                                                                                             | 408.68  | 52.11  | 7.84 | 1.80E-06 | 2.29E-05 |
|      |   |               |            |           | Encodes a MYC-related transcriptional activator with a typical DNA binding domain of a basic helix-loop-helix leucine zipper motif. Binds to an extended G-Box promoter motif and interacts with Jasmonate ZIM-domain proteins. MYC2 interacts with EIN3 and EIL1 to repress hook curvature and resistance to Botrytis cinera.Its transcription is induced by dehydration stress, ABA treatment and blue light via CRY1. Negative regulator of blue light-mediated photomorphogenic growth and blue and far-red-light-regulated gene expression. Positive regulator of lateral root formation. Regulates diverse JA-dependent functions. Negatively regulates Trp metabolism and biosynthesis of Trp-derived secondary metabolites. Positively regulates flavonoid biosynthesis, resistance to insects, and response to oxidative stress. Regulates other transcription factors, and negatively regulates its own expression. For example it binds to and regulates the expression of NST1. Its stability is modulated by PUB10 through polyubiquitination. |         |        |      |          |          |
| 4090 | 7 | F2-3 vs. S2-3 | 261713_at  | AT1G32640 | Encodes a cytosolic methionine synthase, involved in methionine regeneration via the activated methyl cycle (or SAM cycle)                                                                                                                                                                                                                                                                                                                                                                                                                                                                                                                                                                                                                                                                                                                                                                                                                                                                                                                                  | 373.08  | 47.84  | 7.8  | < 1e-07  | 2.96E-06 |
|      |   |               | 259343_s_a |           |                                                                                                                                                                                                                                                                                                                                                                                                                                                                                                                                                                                                                                                                                                                                                                                                                                                                                                                                                                                                                                                             |         |        |      |          |          |
| 4091 | 7 | F2-3 vs. S2-3 | t          | AT3G03780 | Fatty acid/sphingolipid desaturase;(source:Araport11)                                                                                                                                                                                                                                                                                                                                                                                                                                                                                                                                                                                                                                                                                                                                                                                                                                                                                                                                                                                                       | 1883.09 | 242.47 | 7.77 | 2.00E-07 | 4.97E-06 |
| 4092 | 7 | F2-3 vs. S2-3 | 266592_at  | AT2G46210 | Major facilitator superfamily protein;(source:Araport11)                                                                                                                                                                                                                                                                                                                                                                                                                                                                                                                                                                                                                                                                                                                                                                                                                                                                                                                                                                                                    | 176.4   | 22.75  | 7.75 | 1.00E-07 | 2.96E-06 |
| 4093 | 7 | F2-3 vs. S2-3 | 251916_at  | AT3G53960 | Encodes a member of the Arabidopsis LIM proteins: a family of actin bundlers with distinct expression patterns. WLIM1, WLIM2a, and WLIM2b are widely expressed, whereas PLIM2a, PLIM2b, and PLIM2c are predominantly expressed in pollen. Regulates actin cytoskeleton organization. The mRNA is cell-to-cell mobile.                                                                                                                                                                                                                                                                                                                                                                                                                                                                                                                                                                                                                                                                                                                                       | 231.48  | 29.94  | 7.73 | < 1e-07  | < 1e-07  |
| 4094 | 7 | F2-3 vs. S2-3 | 261559_at  | AT1G01780 | hemolysin-III related integral membrane protein;(source:Araport11)                                                                                                                                                                                                                                                                                                                                                                                                                                                                                                                                                                                                                                                                                                                                                                                                                                                                                                                                                                                          | 98.65   | 12.98  | 7.6  | 6.00E-07 | 1.10E-05 |
| 4095 | 7 | F2-3 vs. S2-3 | 266075_s_a | AT2G40710 | a member of the plasma membrane intrinsic protein PIP2. functions as aquaporin and is involved in desiccation.                                                                                                                                                                                                                                                                                                                                                                                                                                                                                                                                                                                                                                                                                                                                                                                                                                                                                                                                              | 365.66  | 48.15  | 7.59 | 3.40E-06 | 3.52E-05 |
|      |   |               | 265444_s_a |           |                                                                                                                                                                                                                                                                                                                                                                                                                                                                                                                                                                                                                                                                                                                                                                                                                                                                                                                                                                                                                                                             |         |        |      |          |          |
| 4096 | 7 | F2-3 vs. S2-3 | t          | AT2G37180 | Encodes glutathione transferase belonging to the phi class of GSTs. Naming convention according to Wagner et al. (2002).                                                                                                                                                                                                                                                                                                                                                                                                                                                                                                                                                                                                                                                                                                                                                                                                                                                                                                                                    | 1236.36 | 163.55 | 7.56 | < 1e-07  | < 1e-07  |
| 4097 | 7 | F2-3 vs. S2-3 | 264207_at  | AT1G22750 | purple acid phosphatase 22;(source:Araport11)                                                                                                                                                                                                                                                                                                                                                                                                                                                                                                                                                                                                                                                                                                                                                                                                                                                                                                                                                                                                               | 122.47  | 16.26  | 7.53 | < 1e-07  | < 1e-07  |
| 4098 | 7 | F2-3 vs. S2-3 | 258851_at  | AT3G03190 | Member of a small family of oligopeptide transporters similar to the yellow stripe locus of maize (ZmYS1).                                                                                                                                                                                                                                                                                                                                                                                                                                                                                                                                                                                                                                                                                                                                                                                                                                                                                                                                                  | 351.25  | 46.86  | 7.5  | < 1e-07  | < 1e-07  |
| 4099 | 7 | F2-3 vs. S2-3 | 252006_at  | AT3G52820 | Dormancy/auxin associated family protein;(source:Araport11)                                                                                                                                                                                                                                                                                                                                                                                                                                                                                                                                                                                                                                                                                                                                                                                                                                                                                                                                                                                                 | 160.63  | 21.42  | 7.5  | < 1e-07  | 2.96E-06 |
| 4100 | 7 | F2-3 vs. S2-3 | 254174_at  | AT4G24120 | 14-3-3 protein GF14iota (grf12)                                                                                                                                                                                                                                                                                                                                                                                                                                                                                                                                                                                                                                                                                                                                                                                                                                                                                                                                                                                                                             | 351.5   | 47.18  | 7.45 | 3.00E-07 | 6.68E-06 |
| 4101 | 7 | F2-3 vs. S2-3 | 249048_at  | AT5G44300 | Encodes a putative arabinogalactan-protein (AGP40) that is expressed in pollen.                                                                                                                                                                                                                                                                                                                                                                                                                                                                                                                                                                                                                                                                                                                                                                                                                                                                                                                                                                             | 170.17  | 22.86  | 7.44 | 1.00E-07 | 2.96E-06 |
| 4102 | 7 | F2-3 vs. S2-3 | 261015_at  | AT1G26480 | Pectin lyase-like superfamily protein;(source:Araport11)                                                                                                                                                                                                                                                                                                                                                                                                                                                                                                                                                                                                                                                                                                                                                                                                                                                                                                                                                                                                    | 133.82  | 18.17  | 7.36 | 2.00E-07 | 4.97E-06 |
| 4103 | 7 | F2-3 vs. S2-3 | 257986_at  | AT3G20865 |                                                                                                                                                                                                                                                                                                                                                                                                                                                                                                                                                                                                                                                                                                                                                                                                                                                                                                                                                                                                                                                             | 274.8   | 37.79  | 7.27 | 5.93E-05 | 2.67E-04 |
| 4104 | 7 | F2-3 vs. S2-3 | 248073_at  | AT5G55720 |                                                                                                                                                                                                                                                                                                                                                                                                                                                                                                                                                                                                                                                                                                                                                                                                                                                                                                                                                                                                                                                             | 81.9    | 11.27  | 7.27 | 2.00E-07 | 4.97E-06 |
|      |   |               |            |           | Floral homeotic gene encoding a MADS domain protein homologous to SRF transcription factors. Specifies petal and stamen identities. Associates with PISTILLATA.                                                                                                                                                                                                                                                                                                                                                                                                                                                                                                                                                                                                                                                                                                                                                                                                                                                                                             |         |        |      |          |          |
| 4105 | 7 | F2-3 vs. S2-3 | 251898_at  | AT3G54340 |                                                                                                                                                                                                                                                                                                                                                                                                                                                                                                                                                                                                                                                                                                                                                                                                                                                                                                                                                                                                                                                             | 277.62  | 38.23  | 7.26 | 5.00E-07 | 9.67E-06 |
| 4106 | 7 | F2-3 vs. S2-3 | 251304_at  | AT3G61990 | Encodes a protein methyltransferase. Involved in the methylation of plant transmembrane proteins.                                                                                                                                                                                                                                                                                                                                                                                                                                                                                                                                                                                                                                                                                                                                                                                                                                                                                                                                                           | 299.38  | 42.43  | 7.06 | < 1e-07  | < 1e-07  |
| 4107 | 7 | F2-3 vs. S2-3 | 251405_at  | AT3G60330 | H[+]-ATPase 7;(source:Araport11)                                                                                                                                                                                                                                                                                                                                                                                                                                                                                                                                                                                                                                                                                                                                                                                                                                                                                                                                                                                                                            | 144.82  | 20.77  | 6.97 | 1.00E-07 | 2.96E-06 |
| 4108 | 7 | F2-3 vs. S2-3 | 253177_s_a | AT4G35150 | O-methyltransferase family protein;(source:Araport11)                                                                                                                                                                                                                                                                                                                                                                                                                                                                                                                                                                                                                                                                                                                                                                                                                                                                                                                                                                                                       | 413.91  | 59.41  | 6.97 | 2.00E-07 | 4.97E-06 |



|      |   |               |                         |           |                                                                                                                                                                                                                                                                                                                                                                                                                                                                                  |         |        |      |          |          |
|------|---|---------------|-------------------------|-----------|----------------------------------------------------------------------------------------------------------------------------------------------------------------------------------------------------------------------------------------------------------------------------------------------------------------------------------------------------------------------------------------------------------------------------------------------------------------------------------|---------|--------|------|----------|----------|
| 4109 | 7 | F2-3 vs. S2-3 | 248713_at<br>255997_s_a | AT5G48180 | Encodes a nitrile-specifier protein NSP5. NSP5 is one out of five (At3g16400/NSP1, At2g33070/NSP2, At3g16390/NSP3, At3g16410/NSP4 and At5g48180/NSP5) A. thaliana epithiospecifier protein (ESP) homologues that promote simple nitrile, but not epithionitrile or thiocyanate formation.                                                                                                                                                                                        | 342.72  | 49.2   | 6.97 | 4.30E-06 | 4.17E-05 |
| 4110 | 7 | F2-3 vs. S2-3 | t                       | AT1G29930 | Subunit of light-harvesting complex II (LHCII), which absorbs light and transfers energy to the photosynthetic reaction center. The mRNA is cell-to-cell mobile.                                                                                                                                                                                                                                                                                                                 | 2058.1  | 295.67 | 6.96 | < 1e-07  | 2.96E-06 |
| 4111 | 7 | F2-3 vs. S2-3 | 262396_at               | AT1G49470 | transmembrane epididymal protein (DUF716);(source:Araport11)                                                                                                                                                                                                                                                                                                                                                                                                                     | 131.83  | 19.12  | 6.9  | < 1e-07  | < 1e-07  |
| 4112 | 7 | F2-3 vs. S2-3 | 253344_at               | AT4G33550 | Bifunctional inhibitor/lipid-transfer protein/seed storage 2S albumin superfamily protein;(source:Araport11)                                                                                                                                                                                                                                                                                                                                                                     | 168.85  | 24.49  | 6.9  | 3.80E-06 | 3.79E-05 |
| 4113 | 7 | F2-3 vs. S2-3 | 247902_at               | AT5G57350 | member of Plasma membrane H <sup>+</sup> -ATPase family                                                                                                                                                                                                                                                                                                                                                                                                                          | 409.62  | 59.33  | 6.9  | 4.90E-06 | 4.55E-05 |
| 4114 | 7 | F2-3 vs. S2-3 | 254740_s_a              | AT4G13930 | Encodes a serine hydroxymethyltransferase maximally expressed in root                                                                                                                                                                                                                                                                                                                                                                                                            | 1901.59 | 276.83 | 6.87 | 2.00E-07 | 4.97E-06 |
| 4115 | 7 | F2-3 vs. S2-3 | 265547_at               | AT2G28305 | Putative lysine decarboxylase family protein;(source:Araport11)                                                                                                                                                                                                                                                                                                                                                                                                                  | 266.53  | 39.15  | 6.81 | 1.00E-07 | 2.96E-06 |
| 4116 | 7 | F2-3 vs. S2-3 | 263379_at               | AT2G40140 | zinc finger (CCCH-type) family protein;(source:Araport11)                                                                                                                                                                                                                                                                                                                                                                                                                        | 363.05  | 53.57  | 6.78 | < 1e-07  | 2.96E-06 |
| 4117 | 7 | F2-3 vs. S2-3 | 252973_s_a              | AT4G38740 | Encodes cytosolic cyclophilin ROC1.                                                                                                                                                                                                                                                                                                                                                                                                                                              | 881.5   | 130.47 | 6.76 | 1.80E-06 | 2.29E-05 |
| 4118 | 7 | F2-3 vs. S2-3 | 263533_at               | AT2G24820 | translocon at the inner envelope membrane of chloroplasts 55-II;(source:Araport11)                                                                                                                                                                                                                                                                                                                                                                                               | 207.73  | 30.88  | 6.73 | < 1e-07  | < 1e-07  |
| 4119 | 7 | F2-3 vs. S2-3 | 251591_at               | AT3G57680 | Peptidase S41 family protein;(source:Araport11)                                                                                                                                                                                                                                                                                                                                                                                                                                  | 364.16  | 54.21  | 6.72 | < 1e-07  | < 1e-07  |
| 4120 | 7 | F2-3 vs. S2-3 | 265923_at               | AT2G18470 | Proline-rich extensin-like receptor kinase 4. Functions at an early stage of ABA signalling inhibiting primary root cell elongation by perturbing Ca <sup>2+</sup> homeostasis.                                                                                                                                                                                                                                                                                                  | 110.01  | 16.54  | 6.65 | 2.65E-05 | 1.49E-04 |
| 4121 | 7 | F2-3 vs. S2-3 | 261881_at               | AT1G80760 | Encodes a protein with boron transporter activity. It helps to preferentially direct boron to young developing tissues in the shoot, such as immature leaves, under low boron conditions. This boron channel appears to be impermeable to water, unlike the closely related NIP5;1 boron transporter. This protein also allows the transport of glycerol, urea, and formimide but not larger uncharged solutes such as arabinol and sucrose when it is expressed heterologously. | 151.95  | 22.96  | 6.62 | < 1e-07  | 2.96E-06 |
| 4122 | 7 | F2-3 vs. S2-3 | 253643_at               | AT4G29780 | Expression of the gene is affected by multiple stresses. Knockout and overexpression lines show no obvious phenotypes.                                                                                                                                                                                                                                                                                                                                                           | 816.98  | 123.83 | 6.6  | < 1e-07  | < 1e-07  |
| 4123 | 7 | F2-3 vs. S2-3 | 265475_at               | AT2G15620 | Involved in the second step of nitrate assimilation. Its expression is induced by nitrate. The mRNA is cell-to-cell mobile.                                                                                                                                                                                                                                                                                                                                                      | 119.95  | 18.29  | 6.56 | < 1e-07  | < 1e-07  |
| 4124 | 7 | F2-3 vs. S2-3 | 262454_at               | AT1G11190 | Encodes a bifunctional nuclease that acts on both RNA and DNA involved in nucleic acid degradation to facilitate nucleotide and phosphate recovery during senescence. It has mismatch-specific endonuclease activity with wide recognition of single base mismatches as well as the ability to cleave indel types of mismatches (heteroduplexes with loops).                                                                                                                     | 170.32  | 26.16  | 6.51 | < 1e-07  | < 1e-07  |
| 4125 | 7 | F2-3 vs. S2-3 | 264204_at               | AT1G22710 | Encodes for a high-affinity transporter essential for phloem loading and long-distance transport. A major sucrose transporter, AtSUC2 can also transport a wide range of physiological and synthetic glucose conjugates with both &#945;- or &#946;-linkage.                                                                                                                                                                                                                     | 466.32  | 71.74  | 6.5  | 2.20E-06 | 2.63E-05 |
| 4126 | 7 | F2-3 vs. S2-3 | 244936_at               | ATCG01100 | NADH dehydrogenase ND1                                                                                                                                                                                                                                                                                                                                                                                                                                                           | 121.74  | 18.77  | 6.49 | 1.20E-06 | 1.75E-05 |
| 4127 | 7 | F2-3 vs. S2-3 | 258614_at               | AT3G02770 | Ribonuclease E inhibitor RraA/Dimethylmenaquinone methyltransferase;(source:Araport11)                                                                                                                                                                                                                                                                                                                                                                                           | 141.56  | 21.84  | 6.48 | 3.00E-07 | 6.68E-06 |
| 4128 | 7 | F2-3 vs. S2-3 | 259429_at               | AT1G01600 | Encodes a member of the CYP86A subfamily of cytochrome p450 genes. Expressed significantly at highest level in mature stems and flowers.                                                                                                                                                                                                                                                                                                                                         | 101.17  | 15.63  | 6.47 | 2.00E-07 | 4.97E-06 |
| 4129 | 7 | F2-3 vs. S2-3 | 248643_at               | AT5G49130 | MATE efflux family protein;(source:Araport11)                                                                                                                                                                                                                                                                                                                                                                                                                                    | 183.55  | 28.42  | 6.46 | 3.73E-05 | 1.92E-04 |
| 4130 | 7 | F2-3 vs. S2-3 | 247033_at               | AT5G67250 | Encodes an SKP1 interacting partner (SKIP2).Encodes an F-box protein. Based on genetic analysis appears to be functionally redundant with VFB1,2, and 3. When expression of all 4 genes is reduced plants show defects in growth and reduced expression of auxin response genes.                                                                                                                                                                                                 | 774.08  | 120.27 | 6.44 | < 1e-07  | 2.96E-06 |
| 4131 | 7 | F2-3 vs. S2-3 | 261754_at               | AT1G76130 | alpha-amylase, putative / 1,4-alpha-D-glucan glucanohydrolase, putative, strong similarity to alpha-amylase Gl:7532799 from (Malus x domestica);contains Pfam profile PF00128: Alpha amylase, catalytic domain. Predicted to be secreted based on SignalP analysis.                                                                                                                                                                                                              | 431.53  | 67.09  | 6.43 | 1.80E-06 | 2.29E-05 |
| 4132 | 7 | F2-3 vs. S2-3 | 265091_s_a              | AT1G03495 | HXXXD-type acyl-transferase family protein;(source:Araport11)                                                                                                                                                                                                                                                                                                                                                                                                                    | 82.99   | 13.01  | 6.38 | 3.00E-07 | 6.68E-06 |
| 4133 | 7 | F2-3 vs. S2-3 | 251358_at               | AT3G61160 | Protein kinase superfamily protein;(source:Araport11)                                                                                                                                                                                                                                                                                                                                                                                                                            | 276.31  | 44.1   | 6.27 | 5.00E-07 | 9.67E-06 |
| 4134 | 7 | F2-3 vs. S2-3 | 263838_at               | AT2G36880 | methionine adenosyltransferase 3;(source:Araport11)                                                                                                                                                                                                                                                                                                                                                                                                                              | 1902.39 | 303.69 | 6.26 | < 1e-07  | < 1e-07  |
| 4135 | 7 | F2-3 vs. S2-3 | 256245_at               | AT3G12580 | heat shock protein 70;(source:Araport11)                                                                                                                                                                                                                                                                                                                                                                                                                                         | 189.71  | 30.34  | 6.25 | < 1e-07  | 2.96E-06 |

|      |   |               |  |            |           |                                                                                                                                                                                                                                                                                                                                                                                                                                                                                                   |         |        |      |          |          |
|------|---|---------------|--|------------|-----------|---------------------------------------------------------------------------------------------------------------------------------------------------------------------------------------------------------------------------------------------------------------------------------------------------------------------------------------------------------------------------------------------------------------------------------------------------------------------------------------------------|---------|--------|------|----------|----------|
|      |   |               |  | 266184_s_a |           | Encodes Pht1;7, a member of the Pht1 family of phosphate transporters which include: Pht1;1/At5g43350, Pht1;2/At5g43370, Pht1;3/At5g43360, Pht1;4/At2g38940, Pht1;5/At2g32830, Pht1;6/At5g43340, Pht1;7/At3g54700, Pht1;8/At1g20860, Pht1;9/At1g76430 (Plant Journal 2002, 31:341).                                                                                                                                                                                                               |         |        |      |          |          |
| 4136 | 7 | F2-3 vs. S2-3 |  | t          | AT3G54700 | PLAT/LH2 domain-containing lipoxygenase family protein;(source:Araport11)                                                                                                                                                                                                                                                                                                                                                                                                                         | 59.73   | 9.56   | 6.25 | 6.00E-07 | 1.10E-05 |
| 4137 | 7 | F2-3 vs. S2-3 |  | 260399_at  | AT1G72520 | beta-galactosidase 4;(source:Araport11)                                                                                                                                                                                                                                                                                                                                                                                                                                                           | 123.44  | 19.78  | 6.24 | 3.00E-07 | 6.68E-06 |
| 4138 | 7 | F2-3 vs. S2-3 |  | 247954_at  | AT5G56870 | member of Oleosin-like protein family                                                                                                                                                                                                                                                                                                                                                                                                                                                             | 244.54  | 39.24  | 6.23 | 5.00E-07 | 9.67E-06 |
| 4139 | 7 | F2-3 vs. S2-3 |  | 250610_at  | AT5G07550 | Encodes a peroxisomal monodehydroascorbate reductase, involved in the ascorbate-glutathione cycle which removes toxic H2O2                                                                                                                                                                                                                                                                                                                                                                        | 75.1    | 12.12  | 6.2  | 7.00E-07 | 1.20E-05 |
| 4140 | 7 | F2-3 vs. S2-3 |  | 252024_at  | AT3G52880 | Encodes an asparaginase that catalyzes the degradation of L-asparagine to L-aspartic acid and ammonia. The mRNA is cell-to-cell mobile.                                                                                                                                                                                                                                                                                                                                                           | 1201.57 | 194.01 | 6.19 | 4.00E-07 | 8.26E-06 |
| 4141 | 7 | F2-3 vs. S2-3 |  | 258338_at  | AT3G16150 |                                                                                                                                                                                                                                                                                                                                                                                                                                                                                                   | 280.83  | 45.49  | 6.17 | < 1e-07  | < 1e-07  |
|      |   |               |  | 267233_s_a |           |                                                                                                                                                                                                                                                                                                                                                                                                                                                                                                   |         |        |      |          |          |
| 4142 | 7 | F2-3 vs. S2-3 |  | t          | AT2G43920 | S-adenosyl-L-methionine-dependent methyltransferases superfamily protein;(source:Araport11)                                                                                                                                                                                                                                                                                                                                                                                                       | 177.96  | 29.36  | 6.06 | 7.40E-06 | 6.07E-05 |
| 4143 | 7 | F2-3 vs. S2-3 |  | 246208_at  | AT4G36490 | SEC14-like 12;(source:Araport11)                                                                                                                                                                                                                                                                                                                                                                                                                                                                  | 81.11   | 13.39  | 6.06 | < 1e-07  | 2.96E-06 |
| 4144 | 7 | F2-3 vs. S2-3 |  | 246998_at  | AT5G67370 | DUF1230 family protein (DUF1230);(source:Araport11)                                                                                                                                                                                                                                                                                                                                                                                                                                               | 106.05  | 17.51  | 6.06 | 1.50E-06 | 2.00E-05 |
| 4145 | 7 | F2-3 vs. S2-3 |  | 247627_at  | AT5G60360 | Encodes a senescence-associated thiol protease. The mRNA is cell-to-cell mobile. Chloroplast lipoxygenase required for wound-induced jasmonic acid accumulation in Arabidopsis. Mutants are resistant to Staphylococcus aureus and accumulate salicylic acid upon infection.CFA-Leu, CFA-Val, CFA-Met and CFA-Ala can induce the expression of LOX2.The mRNA is cell-to-cell mobile.                                                                                                              | 1289.51 | 214.33 | 6.02 | 2.00E-07 | 4.97E-06 |
| 4146 | 7 | F2-3 vs. S2-3 |  | 252618_at  | AT3G45140 | encodes for CP47, subunit of the photosystem II reaction center.                                                                                                                                                                                                                                                                                                                                                                                                                                  | 513.48  | 85.45  | 6.01 | 1.10E-06 | 1.64E-05 |
| 4147 | 7 | F2-3 vs. S2-3 |  | 244972_at  | ATCG00680 |                                                                                                                                                                                                                                                                                                                                                                                                                                                                                                   | 98.43   | 16.45  | 5.98 | 2.00E-07 | 4.97E-06 |
| 4148 | 7 | F2-3 vs. S2-3 |  | 261266_at  | AT1G26770 | Encodes an expansin. Naming convention from the Expansin Working Group (Kende et al, Plant Mol Bio). Involved in the formation of nematode-induced syncytia in roots of Arabidopsis thaliana. Encodes a putative auto-regulated Ca2+-ATPase located in the plasma membrane involved in transporting Ca2+ outside developing pollen grains. This activity is important to support normal pollen development, particularly the progression to uninucleated microspores to bicellular pollen grains. | 182.06  | 30.63  | 5.94 | 2.24E-05 | 1.31E-04 |
| 4149 | 7 | F2-3 vs. S2-3 |  | 267255_at  | AT2G22950 |                                                                                                                                                                                                                                                                                                                                                                                                                                                                                                   | 117.21  | 19.92  | 5.89 | < 1e-07  | < 1e-07  |
| 4150 | 7 | F2-3 vs. S2-3 |  | 245057_at  | AT2G26490 | JGB contains seven WD40 repeats and is highly conserved in flowering plants. Overexpression inhibits pollen germination. suggesting JGB is a negative regulator of pollen germination                                                                                                                                                                                                                                                                                                             | 86.9    | 14.79  | 5.88 | < 1e-07  | 2.96E-06 |
| 4151 | 7 | F2-3 vs. S2-3 |  | 253083_at  | AT4G36250 | Encodes a putative aldehyde dehydrogenase. The gene is not responsive to osmotic stress and is expressed constitutively at a low level in plantlets and root cultures.                                                                                                                                                                                                                                                                                                                            | 434.46  | 73.86  | 5.88 | 3.00E-07 | 6.68E-06 |
| 4152 | 7 | F2-3 vs. S2-3 |  | 248199_at  | AT5G54170 | Polyketide cyclase/dehydrase and lipid transport superfamily protein;(source:Araport11)                                                                                                                                                                                                                                                                                                                                                                                                           | 220.85  | 37.65  | 5.87 | 2.80E-06 | 3.09E-05 |
| 4153 | 7 | F2-3 vs. S2-3 |  | 260221_at  | AT1G74670 | Gibberellin-regulated family protein;(source:Araport11)                                                                                                                                                                                                                                                                                                                                                                                                                                           | 55.47   | 9.5    | 5.84 | 3.90E-06 | 3.86E-05 |
|      |   |               |  |            |           | Encodes a vacuolar processing enzyme with caspase-1-like activity that is specifically expressed in inner integument of developing seeds. Mutants display abnormal seed coat development. It is speculated to be involved in cell death of limited cell layers, the purpose of which is to form a seed coat.                                                                                                                                                                                      |         |        |      |          |          |
| 4154 | 7 | F2-3 vs. S2-3 |  | 257130_at  | AT3G20210 |                                                                                                                                                                                                                                                                                                                                                                                                                                                                                                   | 104.24  | 17.89  | 5.83 | 1.30E-06 | 1.81E-05 |
| 4155 | 7 | F2-3 vs. S2-3 |  | 249536_at  | AT5G38760 | Late embryogenesis abundant protein (LEA) family protein;(source:Araport11)                                                                                                                                                                                                                                                                                                                                                                                                                       | 56.62   | 9.73   | 5.82 | < 1e-07  | < 1e-07  |
| 4156 | 7 | F2-3 vs. S2-3 |  | 252474_at  | AT3G46620 | Encodes an ABA- and drought-induced RING-DUF1117 gene whose mutation results in hyposensitive phenotypes toward ABA in terms of germination rate and stomatal closure and markedly reduced tolerance to drought stress relative to wild-type plants. Encodes a cytochrome p450 enzyme that catalyzes the initial conversion of aldoximes to thiohydroximates in the synthesis of glucosinolates not derived from tryptophan. Also has a role in auxin homeostasis.                                | 627.08  | 108.31 | 5.79 | < 1e-07  | < 1e-07  |
| 4157 | 7 | F2-3 vs. S2-3 |  | 254687_at  | AT4G13770 | Uncharacterized protein family (UPF0497);(source:Araport11)                                                                                                                                                                                                                                                                                                                                                                                                                                       | 658.33  | 114.14 | 5.77 | < 1e-07  | < 1e-07  |
| 4158 | 7 | F2-3 vs. S2-3 |  | 245304_at  | AT4G15630 | Cysteine peptidase. Enzyme activity detected in leaf.                                                                                                                                                                                                                                                                                                                                                                                                                                             | 104.82  | 18.23  | 5.75 | 2.00E-07 | 4.97E-06 |
| 4159 | 7 | F2-3 vs. S2-3 |  | 262796_at  | AT1G20850 |                                                                                                                                                                                                                                                                                                                                                                                                                                                                                                   | 429.98  | 75.1   | 5.73 | 9.00E-07 | 1.44E-05 |
| 4160 | 7 | F2-3 vs. S2-3 |  | 262473_at  | AT1G50250 | encodes an FTSH protease that is localized to the chloroplast. Involved in the D1 repair cycle of Photosystem II. FtsH1 and FtsH5 are interchangeable in thylakoid membranes.                                                                                                                                                                                                                                                                                                                     | 479.18  | 83.59  | 5.73 | 1.40E-06 | 1.89E-05 |
| 4161 | 7 | F2-3 vs. S2-3 |  | 263758_s_a | AT2G21250 | NAD(P)-linked oxidoreductase superfamily protein;(source:Araport11)                                                                                                                                                                                                                                                                                                                                                                                                                               | 726.31  | 126.65 | 5.73 | 2.90E-06 | 3.14E-05 |
| 4162 | 7 | F2-3 vs. S2-3 |  | 251091_at  | AT5G01410 | Encodes a protein predicted to function in tandem with PDX2 to form glutamine amidotransferase complex with involved in vitamin B6 biosynthesis.                                                                                                                                                                                                                                                                                                                                                  | 518.96  | 91.44  | 5.68 | 1.00E-07 | 2.96E-06 |

|      |   |               |            |           |                                                                                                                                                                                                                                                                                                                                                                                                                                                                                                                                                                                                                                                                       |         |        |      |          |          |
|------|---|---------------|------------|-----------|-----------------------------------------------------------------------------------------------------------------------------------------------------------------------------------------------------------------------------------------------------------------------------------------------------------------------------------------------------------------------------------------------------------------------------------------------------------------------------------------------------------------------------------------------------------------------------------------------------------------------------------------------------------------------|---------|--------|------|----------|----------|
| 4163 | 7 | F2-3 vs. S2-3 | 252095_at  | AT3G51000 | alpha/beta-Hydrolases superfamily protein;(source:Araport11)                                                                                                                                                                                                                                                                                                                                                                                                                                                                                                                                                                                                          | 152.96  | 27.07  | 5.65 | 1.40E-06 | 1.89E-05 |
| 4164 | 7 | F2-3 vs. S2-3 | 266708_at  | AT2G03200 | Atypical aspartic protease which modulates lateral root development.                                                                                                                                                                                                                                                                                                                                                                                                                                                                                                                                                                                                  | 99.37   | 17.67  | 5.62 | 2.00E-07 | 4.97E-06 |
| 4165 | 7 | F2-3 vs. S2-3 | 259615_at  | AT1G47980 | desiccation-like protein;(source:Araport11)                                                                                                                                                                                                                                                                                                                                                                                                                                                                                                                                                                                                                           | 136.58  | 24.35  | 5.61 | 4.00E-07 | 8.26E-06 |
| 4166 | 7 | F2-3 vs. S2-3 | 254098_at  | AT4G25100 | Fe-superoxide dismutase<br>chloroplast gene encoding a CP43 subunit of the photosystem II reaction center. promoter contains a blue-light responsive element.                                                                                                                                                                                                                                                                                                                                                                                                                                                                                                         | 820.89  | 146.94 | 5.59 | 2.00E-06 | 2.46E-05 |
| 4167 | 7 | F2-3 vs. S2-3 | 245003_at  | ATCG00280 | Responsible for the synthesis of callose deposited at the primary cell wall of meiocytes, tetrads and microspores. Required for exine formation during microgametogenesis and for pollen viability.<br>Highest expression in meiocytes, tetrads, microspores and mature pollen.                                                                                                                                                                                                                                                                                                                                                                                       | 456.19  | 81.97  | 5.57 | 3.80E-06 | 3.79E-05 |
| 4168 | 7 | F2-3 vs. S2-3 | 264112_at  | AT2G13680 | Encodes the chloroplast enzyme sedoheptulose-1,7-bisphosphatase (SBPase), involved in the carbon reduction of the Calvin cycle. Increase in SBPase activity in transgenic lines accumulate up to 50% more sucrose and starch than wild-type. The mRNA is cell-to-cell mobile.                                                                                                                                                                                                                                                                                                                                                                                         | 88.7    | 16.01  | 5.54 | 1.21E-04 | 4.48E-04 |
| 4169 | 7 | F2-3 vs. S2-3 | 251762_at  | AT3G55800 | Encodes a high-affinity, proton-dependent glucosinolate-specific transporter that is crucial for the transport of both methionine- and tryptophan-derived glucosinolates to seeds.                                                                                                                                                                                                                                                                                                                                                                                                                                                                                    | 647.97  | 117.04 | 5.54 | 6.00E-07 | 1.10E-05 |
| 4170 | 7 | F2-3 vs. S2-3 | 252377_at  | AT3G47960 | Pectinacetyltransferase family protein;(source:Araport11)                                                                                                                                                                                                                                                                                                                                                                                                                                                                                                                                                                                                             | 288.18  | 52.37  | 5.5  | 7.00E-07 | 1.20E-05 |
| 4171 | 7 | F2-3 vs. S2-3 | 254573_at  | AT4G19420 | Encodes a papain-like cysteine protease involved in tapetal programmed cell death and pollen development.CEP1 is expressed specifically in the tapetum from stages 5 to 11 of anther development. The CEP1 protein first appears as a proenzyme in precursor protease vesicles, and is then transported to the vacuole and transformed into the mature enzyme before rupture of the vacuole. CEP1 was also released to the tapetal cell wall during late stage 6 and stage 7. After the tapetal cell wall degenerated, the CEP1 enzyme entered the callose wall from the degenerated tapetal cell wall and was probably involved in degeneration of the callose wall. | 259.19  | 47.29  | 5.48 | 2.90E-06 | 3.14E-05 |
| 4172 | 7 | F2-3 vs. S2-3 | 248545_at  | AT5G50260 | Encodes chloroplast localized glyceraldehyde-3-phosphate dehydrogenase that can use both NADH and NADPH to reduce 1,3-diphosphate glycerate. It forms A2B2 heterotetramers with GapA forms of the GADPH enzyme. These complexes are active in the light under reducing conditions, but show reduced NADPH-dependent activity in response to oxidized thioredoxins and increased NAD(H)/NADP(H) ratios due to the formation of inactive A8B8 hexadecamers. The mRNA is cell-to-cell mobile.                                                                                                                                                                            | 58.03   | 10.61  | 5.47 | < 1e-07  | 2.96E-06 |
| 4173 | 7 | F2-3 vs. S2-3 | 259625_at  | AT1G42970 | B-box type zinc finger family protein;(source:Araport11)                                                                                                                                                                                                                                                                                                                                                                                                                                                                                                                                                                                                              | 1308.44 | 239.81 | 5.46 | 8.00E-07 | 1.32E-05 |
| 4174 | 7 | F2-3 vs. S2-3 | 257262_at  | AT3G21890 | Pathogen-induced transcription factor. Binds W-box sequences in vitro. Forms protein complexes with itself and with WRKY40 and WRKY60. Coexpression with WRKY18 or WRKY60 made plants more susceptible to both P. syringae and B. cinerea. WRKY18, WRKY40, and WRKY60 have partially redundant roles in response to the hemibiotrophic bacterial pathogen Pseudomonas syringae and the necrotrophic fungal pathogen Botrytis cinerea, with WRKY18 playing a more important role than the other two. The mRNA is cell-to-cell mobile.                                                                                                                                  | 362.09  | 66.44  | 5.45 | 1.00E-07 | 2.96E-06 |
| 4175 | 7 | F2-3 vs. S2-3 | 261892_at  | AT1G80840 | Ypt/Rab-GAP domain of gyp1p superfamily protein;(source:Araport11)                                                                                                                                                                                                                                                                                                                                                                                                                                                                                                                                                                                                    | 332.58  | 61.13  | 5.44 | 1.00E-07 | 2.96E-06 |
| 4176 | 7 | F2-3 vs. S2-3 | 248129_at  | AT5G54780 | Male fertility gene acting on tapetum and microspore                                                                                                                                                                                                                                                                                                                                                                                                                                                                                                                                                                                                                  | 81.78   | 15.08  | 5.42 | 6.00E-06 | 5.18E-05 |
| 4177 | 7 | F2-3 vs. S2-3 | 265022_at  | AT1G24520 | Encodes one of eight Arabidopsis actins. ACT4 belongs to the reproductive actin subclass which is predominantly expressed in developing and reproductive tissues, such as pollen, pollen tubes, ovules, and developing seeds. Expression of the ACT4/GUS fusion was restricted to young vascular tissues, tapetum, and developing and mature pollen.                                                                                                                                                                                                                                                                                                                  | 225.56  | 41.85  | 5.39 | < 1e-07  | 2.96E-06 |
| 4178 | 7 | F2-3 vs. S2-3 | 247736_at  | AT5G59370 | glycine-rich protein;(source:Araport11)                                                                                                                                                                                                                                                                                                                                                                                                                                                                                                                                                                                                                               | 48.83   | 9.06   | 5.39 | 5.00E-07 | 9.67E-06 |
| 4179 | 7 | F2-3 vs. S2-3 | 253619_at  | AT4G30460 | Protein phosphatase 2C family protein;(source:Araport11)                                                                                                                                                                                                                                                                                                                                                                                                                                                                                                                                                                                                              | 242.09  | 44.96  | 5.38 | 2.19E-05 | 1.30E-04 |
| 4180 | 7 | F2-3 vs. S2-3 | 256279_at  | AT3G12620 | Arabidopsis thaliana aldehyde dehydrogenase AtALDH1a mRNA. a sinapaldehyde dehydrogenase catalyzes both the oxidation of coniferylaldehyde and sinapaldehyde forming ferulic acid and sinapic acid, respectively                                                                                                                                                                                                                                                                                                                                                                                                                                                      | 213.57  | 39.81  | 5.37 | 1.00E-07 | 2.96E-06 |
| 4181 | 7 | F2-3 vs. S2-3 | 258140_at  | AT3G24503 | member of CYP704A                                                                                                                                                                                                                                                                                                                                                                                                                                                                                                                                                                                                                                                     | 460.82  | 86.46  | 5.33 | 3.00E-07 | 6.68E-06 |
| 4182 | 7 | F2-3 vs. S2-3 | 267500_s_a | AT2G44890 | nuclear factor Y, subunit B7;(source:Araport11)                                                                                                                                                                                                                                                                                                                                                                                                                                                                                                                                                                                                                       | 122.46  | 23.14  | 5.29 | 2.30E-06 | 2.69E-05 |
| 4183 | 7 | F2-3 vs. S2-3 | 263718_at  | AT2G13570 | Encodes a component of the light harvesting complex of photosystem I.                                                                                                                                                                                                                                                                                                                                                                                                                                                                                                                                                                                                 | 73.1    | 13.9   | 5.26 | 1.70E-06 | 2.21E-05 |
| 4184 | 7 | F2-3 vs. S2-3 | 245806_at  | AT1G45474 |                                                                                                                                                                                                                                                                                                                                                                                                                                                                                                                                                                                                                                                                       | 207.45  | 39.53  | 5.25 | 1.00E-07 | 2.96E-06 |

|      |   |               |            |           |                                                                                                                                                                                                                                                                                                                                                          |        |        |      |          |          |
|------|---|---------------|------------|-----------|----------------------------------------------------------------------------------------------------------------------------------------------------------------------------------------------------------------------------------------------------------------------------------------------------------------------------------------------------------|--------|--------|------|----------|----------|
| 4185 | 7 | F2-3 vs. S2-3 | 265587_at  | AT2G19980 | CAP (Cysteine-rich secretory proteins, Antigen 5, and Pathogenesis-related 1 protein) superfamily protein;(source:Araport11)                                                                                                                                                                                                                             | 48.11  | 9.16   | 5.25 | 5.00E-07 | 9.67E-06 |
| 4186 | 7 | F2-3 vs. S2-3 | 253638_at  | AT4G30470 | NAD(P)-binding Rossmann-fold superfamily protein;(source:Araport11)                                                                                                                                                                                                                                                                                      | 981.15 | 187.43 | 5.23 | 2.40E-06 | 2.77E-05 |
| 4187 | 7 | F2-3 vs. S2-3 | 246183_at  | AT5G20940 | Glycosyl hydrolase family protein;(source:Araport11)                                                                                                                                                                                                                                                                                                     | 110.01 | 21.07  | 5.22 | 1.00E-06 | 1.54E-05 |
| 4188 | 7 | F2-3 vs. S2-3 | 245636_at  | AT1G25240 | ENTH/VHS/GAT family protein;(source:Araport11)                                                                                                                                                                                                                                                                                                           | 70.87  | 13.61  | 5.21 | 2.40E-06 | 2.77E-05 |
| 4189 | 7 | F2-3 vs. S2-3 | 252482_at  | AT3G46670 | UDP-glucosyl transferase 76E11;(source:Araport11)                                                                                                                                                                                                                                                                                                        | 127.63 | 24.49  | 5.21 | 1.20E-06 | 1.75E-05 |
| 4190 | 7 | F2-3 vs. S2-3 | 253172_at  | AT4G35060 | Heavy metal transport/detoxification superfamily protein;(source:Araport11)                                                                                                                                                                                                                                                                              | 143.12 | 27.59  | 5.19 | 3.00E-07 | 6.68E-06 |
|      |   |               | 258186_s_a |           | Protein kinase which together with IREH1 plays an important role in controlling root skewing and maintaining the microtubule network.                                                                                                                                                                                                                    |        |        |      |          |          |
| 4191 | 7 | F2-3 vs. S2-3 |            | AT1G48490 |                                                                                                                                                                                                                                                                                                                                                          | 361.2  | 69.77  | 5.18 | 2.21E-05 | 1.30E-04 |
| 4192 | 7 | F2-3 vs. S2-3 | 256617_at  | AT3G22240 | cysteine-rich/transmembrane domain PCC1-like protein;(source:Araport11)                                                                                                                                                                                                                                                                                  | 358.05 | 69.21  | 5.17 | 1.82E-05 | 1.13E-04 |
| 4193 | 7 | F2-3 vs. S2-3 | 260847_s_a | AT1G72330 | Encodes for alanine aminotransferase ALAAT2.                                                                                                                                                                                                                                                                                                             | 449.09 | 87.27  | 5.15 | 4.40E-06 | 4.21E-05 |
|      |   |               |            |           | encodes an amino acid transporter that transports aromatic and neutral amino acids, IAA, and 2,4-D. Expressed in all tissues with highest abundance in flowers and cauline leaves. a member of a small gene family in Arabidopsis and represents a new class of amino acid transporters.                                                                 |        |        |      |          |          |
| 4194 | 7 | F2-3 vs. S2-3 | 258729_at  | AT3G11900 | Encodes a thylakoidal processing peptidase that removes signal sequences from proteins synthesized in the cytoplasm and transported into the thylakoid lumen. The mRNA is cell-to-cell mobile.                                                                                                                                                           | 418.38 | 81.22  | 5.15 | 1.40E-06 | 1.89E-05 |
|      |   |               | 260829_s_a |           |                                                                                                                                                                                                                                                                                                                                                          |        |        |      |          |          |
| 4195 | 7 | F2-3 vs. S2-3 |            | AT2G30440 |                                                                                                                                                                                                                                                                                                                                                          | 235.59 | 45.82  | 5.14 | 5.63E-04 | 1.45E-03 |
| 4196 | 7 | F2-3 vs. S2-3 | 245842_at  | AT1G58430 | Encodes an anther-specific proline-rich protein. Encodes one of the homologs of the yeast CCR4-associated factor 1: AT3G44260 (CAF1a), AT5G22250 (CAF1b). Has mRNA deadenylation activity. Also plays a role in plant defense responses.                                                                                                                 | 300.27 | 58.56  | 5.13 | 1.00E-06 | 1.54E-05 |
| 4197 | 7 | F2-3 vs. S2-3 | 252679_at  | AT3G44260 |                                                                                                                                                                                                                                                                                                                                                          | 110.58 | 21.63  | 5.11 | 2.00E-07 | 4.97E-06 |
|      |   |               |            |           | Encodes SVR3, a putative chloroplast TypA translation elongation GTPase. Loss of SVR3 suppresses variegation mediated by var2. SVR3 is essential for plants' ability to develop functional chloroplasts under chilling stress (8C), but not at normal temperature (22C).                                                                                 |        |        |      |          |          |
| 4198 | 7 | F2-3 vs. S2-3 | 250256_at  | AT5G13650 | Encodes a cytosolic tyrosine aminotransferase which is strongly induced upon aging and coronatine treatment. AtTAT1 prefers Tyr as an amino donor but can also use Phe, Trp, His, Met, and Leu. The mRNA is cell-to-cell mobile.                                                                                                                         | 377.65 | 74.06  | 5.1  | 3.68E-05 | 1.90E-04 |
| 4199 | 7 | F2-3 vs. S2-3 | 248207_at  | AT5G53970 | Encodes KCS13, a member of the 3-ketoacyl-CoA synthase family involved in the biosynthesis of VLCFA (very long chain fatty acids).                                                                                                                                                                                                                       | 133.56 | 26.2   | 5.1  | < 1e-07  | 2.96E-06 |
|      |   |               | 266319_s_a |           |                                                                                                                                                                                                                                                                                                                                                          |        |        |      |          |          |
| 4200 | 7 | F2-3 vs. S2-3 |            | AT2G46720 |                                                                                                                                                                                                                                                                                                                                                          | 182.4  | 36.1   | 5.05 | 2.05E-05 | 1.24E-04 |
| 4201 | 7 | F2-3 vs. S2-3 | 260944_at  | AT1G45130 | beta-galactosidase 5;(source:Araport11)                                                                                                                                                                                                                                                                                                                  | 218.82 | 43.42  | 5.04 | 8.00E-07 | 1.32E-05 |
| 4202 | 7 | F2-3 vs. S2-3 | 262905_at  | AT1G59730 | Thioredoxin H-type 7 , oxidoreductase located in cytosol and ER. Interacts with GPT1.                                                                                                                                                                                                                                                                    | 63.17  | 12.52  | 5.04 | 9.10E-06 | 7.07E-05 |
|      |   |               |            |           | Encodes a chloroplastic fructose 1,6-bisphosphate phosphatase. also known as HCEF1 (High Cyclic Electron Flow 1). hcef1 mutants have constitutively elevated electron flow (CEF) and plants with antisense suppression of this enzyme have higher levels of net leaf photosynthesis and increased sucrose biosynthesis. The mRNA is cell-to-cell mobile. |        |        |      |          |          |
| 4203 | 7 | F2-3 vs. S2-3 | 251885_at  | AT3G54050 |                                                                                                                                                                                                                                                                                                                                                          | 447.25 | 88.98  | 5.03 | 4.00E-07 | 8.26E-06 |
|      |   |               |            |           | Encodes a ferretin protein that is targeted to the chloroplast. Member of a Ferritin gene family. Gene expression is induced in response to iron overload and by nitric oxide. Expression of the gene is downregulated in the presence of paraquat, an inducer of photoxidative stress.                                                                  |        |        |      |          |          |
| 4204 | 7 | F2-3 vs. S2-3 | 251109_at  | AT5G01600 |                                                                                                                                                                                                                                                                                                                                                          | 168.45 | 33.55  | 5.02 | 1.00E-07 | 2.96E-06 |
| 4205 | 7 | F2-3 vs. S2-3 | 254563_at  | AT4G19120 | S-adenosyl-L-methionine-dependent methyltransferases superfamily protein;(source:Araport11)                                                                                                                                                                                                                                                              | 320.95 | 64.02  | 5.01 | 7.00E-07 | 1.20E-05 |
| 4206 | 7 | F2-3 vs. S2-3 | 245159_at  | AT2G33100 | encodes a gene similar to cellulose synthase                                                                                                                                                                                                                                                                                                             | 59.72  | 11.95  | 5    | < 1e-07  | 2.96E-06 |
| 4207 | 7 | F2-3 vs. S2-3 | 262707_at  | AT1G16290 | transglycosylase;(source:Araport11)                                                                                                                                                                                                                                                                                                                      | 131.98 | 26.55  | 4.97 | < 1e-07  | 2.96E-06 |
|      |   |               |            |           | encodes a a member of the 1-aminocyclopropane-1-carboxylate (ACC) synthase (S-adenosyl-L-methionine methylthioadenosine-lyase, EC 4.4.1.14) gene family The mRNA is cell-to-cell mobile.                                                                                                                                                                 |        |        |      |          |          |
| 4208 | 7 | F2-3 vs. S2-3 | 254926_at  | AT4G11280 |                                                                                                                                                                                                                                                                                                                                                          | 330.86 | 66.56  | 4.97 | 5.50E-06 | 4.90E-05 |
|      |   |               |            |           | Encodes CHLOROPLAST RNA BINDING (CRB), a putative RNA-binding protein. CRB is important for the proper functioning of the chloroplast. Mutations in CRB also affects the circadian system, altering the expression of both oscillator and output genes. The mRNA is cell-to-cell mobile.                                                                 |        |        |      |          |          |
| 4209 | 7 | F2-3 vs. S2-3 | 263676_at  | AT1G09340 |                                                                                                                                                                                                                                                                                                                                                          | 458.7  | 92.54  | 4.96 | 2.00E-07 | 4.97E-06 |
| 4210 | 7 | F2-3 vs. S2-3 | 258645_s_a | AT3G07850 | Pectin lyase-like superfamily protein;(source:Araport11)                                                                                                                                                                                                                                                                                                 | 85.12  | 17.15  | 4.96 | 9.23E-05 | 3.68E-04 |
| 4211 | 7 | F2-3 vs. S2-3 | 264005_at  | AT2G22470 | Encodes arabinogalactan-protein (AGP2).                                                                                                                                                                                                                                                                                                                  | 117.02 | 23.65  | 4.95 | 7.00E-07 | 1.20E-05 |
| 4212 | 7 | F2-3 vs. S2-3 | 267115_s_a | AT2G32530 | encodes a gene similar to cellulose synthase                                                                                                                                                                                                                                                                                                             | 96.25  | 19.58  | 4.92 | 2.00E-07 | 4.97E-06 |

|      |   |               |             |           |                                                                                                                                                                                                                                                                                                                                                                                                                                                                                                                                                                                                 |        |        |      |          |          |
|------|---|---------------|-------------|-----------|-------------------------------------------------------------------------------------------------------------------------------------------------------------------------------------------------------------------------------------------------------------------------------------------------------------------------------------------------------------------------------------------------------------------------------------------------------------------------------------------------------------------------------------------------------------------------------------------------|--------|--------|------|----------|----------|
| 4213 | 7 | F2-3 vs. S2-3 | 248916_at   | AT5G45840 | Encodes a leucine-rich-repeat RLK that is localized to the plasma membrane of pollen tubes and functions with MIK1/2 as the male receptor of the pollen tube chemo-attractant LURE1. MDIS1 forms a complex with MIK1/2 and binds LURE1.                                                                                                                                                                                                                                                                                                                                                         | 54.64  | 11.1   | 4.92 | 1.33E-05 | 9.14E-05 |
| 4214 | 7 | F2-3 vs. S2-3 | 266849_at   | AT2G25940 | Encodes a vacuolar processing enzyme belonging to a novel group of cysteine proteinases that is expressed in vegetative organs and is upregulated in association with various types of cell death and under stressed conditions.                                                                                                                                                                                                                                                                                                                                                                | 140.14 | 28.81  | 4.87 | 1.10E-06 | 1.64E-05 |
| 4215 | 7 | F2-3 vs. S2-3 | 245306_at   | AT4G14690 | Encodes an early light-induced protein. ELIPs are thought not to be directly involved in the synthesis and assembly of specific photosynthetic complexes, but rather affect the biogenesis of all chlorophyll-binding complexes. A study (PMID 17553115) has shown that the chlorophyll synthesis pathway was downregulated as a result of constitutive ELIP2 expression, leading to decreased chlorophyll availability for the assembly of pigment-binding proteins for photosynthesis.                                                                                                        | 241.21 | 49.58  | 4.86 | 2.10E-06 | 2.53E-05 |
| 4216 | 7 | F2-3 vs. S2-3 | 250824_at   | AT5G05200 | Protein kinase superfamily protein;(source:Araport11)<br>Encodes a protein with non-phosphorylating NADP-dependent glyceraldehyde-3-phosphate dehydrogenase activity. The activity of the enzyme was determined from leaf extracts; the enzyme has not been purified to confirm activity.                                                                                                                                                                                                                                                                                                       | 203.66 | 42.06  | 4.84 | 9.00E-07 | 1.44E-05 |
| 4217 | 7 | F2-3 vs. S2-3 | 265998_at   | AT2G24270 | cation exchanger 3;(source:Araport11)                                                                                                                                                                                                                                                                                                                                                                                                                                                                                                                                                           | 656.59 | 135.96 | 4.83 | < 1e-07  | 2.96E-06 |
| 4218 | 7 | F2-3 vs. S2-3 | 246302_at   | AT3G51860 | Pectin lyase-like superfamily protein;(source:Araport11)                                                                                                                                                                                                                                                                                                                                                                                                                                                                                                                                        | 209.33 | 43.3   | 4.83 | 3.00E-07 | 6.68E-06 |
| 4219 | 7 | F2-3 vs. S2-3 | 250608_at   | AT5G07420 | Encodes a mitochondrial succinic semialdehyde dehydrogenase (SSADH). Nomenclature according to Kirch, et al (2004).                                                                                                                                                                                                                                                                                                                                                                                                                                                                             | 48.37  | 10.02  | 4.83 | 2.40E-06 | 2.77E-05 |
| 4220 | 7 | F2-3 vs. S2-3 | 262892_at   | AT1G79440 |                                                                                                                                                                                                                                                                                                                                                                                                                                                                                                                                                                                                 | 125.02 | 26.05  | 4.8  | 1.40E-06 | 1.89E-05 |
| 4221 | 7 | F2-3 vs. S2-3 | 263706_s_at | AT5G14200 | The AtIMD1 is one out of 3 genes encoding the enzyme 3-isopropylmalate dehydrogenase involved in leucine biosynthesis in Arabidopsis. Its subcellular location has been targeted to plastids. Encodes methylthioalkylmalate dehydrogenase. Involved in glucosinolate biosynthesis, in methionine chain elongation. The mRNA is cell-to-cell mobile.                                                                                                                                                                                                                                             | 42.82  | 8.94   | 4.79 | 2.34E-04 | 7.39E-04 |
| 4222 | 7 | F2-3 vs. S2-3 | 259694_at   | AT1G63180 | Encodes a protein with UDP-D-glucose 4-epimerase activity. Involved in pollen development.                                                                                                                                                                                                                                                                                                                                                                                                                                                                                                      | 123.3  | 25.86  | 4.77 | 1.08E-04 | 4.15E-04 |
| 4223 | 7 | F2-3 vs. S2-3 | 260014_at   | AT1G68010 | Encodes hydroxypyruvate reductase.                                                                                                                                                                                                                                                                                                                                                                                                                                                                                                                                                              | 211.91 | 44.67  | 4.74 | 4.00E-07 | 8.26E-06 |
| 4224 | 7 | F2-3 vs. S2-3 | 264835_at   | AT1G03550 | Secretory carrier membrane protein (SCAMP) family protein;(source:Araport11)                                                                                                                                                                                                                                                                                                                                                                                                                                                                                                                    | 72.48  | 15.31  | 4.73 | 8.30E-06 | 6.60E-05 |
| 4225 | 7 | F2-3 vs. S2-3 | 249438_at   | AT5G40010 | Encodes a mitochondrial ATPase involved in seed and silique development.                                                                                                                                                                                                                                                                                                                                                                                                                                                                                                                        | 40.8   | 8.66   | 4.71 | 1.03E-05 | 7.67E-05 |
| 4226 | 7 | F2-3 vs. S2-3 | 247095_at   | AT5G66400 | Belongs to the dehydrin protein family, which contains highly conserved stretches of 7-17 residues that are repetitively scattered in their sequences, the K-, S-, Y- and lysine rich segments. ABA- and drought-induced glycine-rich dehydrin protein. The ABA-induced expression of RAB18 was reduced following ACC application, indicating that ethylene inhibits the ABA signaling pathway. RAB18 is also expressed in response to the formation of the phospholipid diacylglycerol pyrophosphate. COR47 and RAB18 double overexpressor plants are cold tolerant. Expressed in guard cells. | 72.93  | 15.49  | 4.71 | 3.00E-07 | 6.68E-06 |
| 4227 | 7 | F2-3 vs. S2-3 | 256754_at   | AT3G25690 | actin binding protein required for normal chloroplast positioningThe mRNA is cell-to-cell mobile. Encodes a myo-inositol oxygenase, which is the first enzyme in the inositol route to ascorbate (L-ascorbic acid, AsA, vitamin C). Overexpression results in enhanced biomass and abiotic stress tolerance.                                                                                                                                                                                                                                                                                    | 184.55 | 39.31  | 4.69 | 2.50E-06 | 2.85E-05 |
| 4228 | 7 | F2-3 vs. S2-3 | 254001_at   | AT4G26260 | Encodes a member of the CYP86A subfamily of cytochrome p450 genes. Expressed at moderate levels in flowers, leaves, roots and stems.                                                                                                                                                                                                                                                                                                                                                                                                                                                            | 61.56  | 13.16  | 4.68 | 1.12E-05 | 8.21E-05 |
| 4229 | 7 | F2-3 vs. S2-3 | 255690_at   | AT4G00360 | Calcium-binding EF-hand family protein;(source:Araport11)                                                                                                                                                                                                                                                                                                                                                                                                                                                                                                                                       | 53.4   | 11.47  | 4.65 | 2.00E-07 | 4.97E-06 |
| 4230 | 7 | F2-3 vs. S2-3 | 259044_at   | AT3G03430 | Encodes ribonuclease RNS3.                                                                                                                                                                                                                                                                                                                                                                                                                                                                                                                                                                      | 43.57  | 9.38   | 4.64 | 2.16E-05 | 1.28E-04 |
| 4231 | 7 | F2-3 vs. S2-3 | 263689_at   | AT1G26820 | Protein kinase superfamily protein;(source:Araport11)                                                                                                                                                                                                                                                                                                                                                                                                                                                                                                                                           | 150.28 | 32.67  | 4.6  | 3.85E-05 | 1.96E-04 |
| 4232 | 7 | F2-3 vs. S2-3 | 253137_at   | AT4G35500 |                                                                                                                                                                                                                                                                                                                                                                                                                                                                                                                                                                                                 | 133.96 | 29.12  | 4.6  | 2.00E-07 | 4.97E-06 |
| 4233 | 7 | F2-3 vs. S2-3 | 257392_at   | AT2G24450 | Fasciclin-like arabinogalactan protein. Possibly involved in embryogenesis and seed development.                                                                                                                                                                                                                                                                                                                                                                                                                                                                                                | 68.59  | 14.93  | 4.59 | 2.76E-05 | 1.53E-04 |
| 4234 | 7 | F2-3 vs. S2-3 | 246431_at   | AT5G17480 | Target promoter of the male germline-specific transcription factor DUO1.                                                                                                                                                                                                                                                                                                                                                                                                                                                                                                                        | 32.03  | 6.99   | 4.58 | 1.00E-06 | 1.54E-05 |
| 4235 | 7 | F2-3 vs. S2-3 | 262282_at   | AT1G68610 | carboxyl-terminal proteinase-like protein (DUF239);(source:Araport11)                                                                                                                                                                                                                                                                                                                                                                                                                                                                                                                           | 54.05  | 11.9   | 4.54 | 1.80E-06 | 2.29E-05 |
| 4236 | 7 | F2-3 vs. S2-3 | 248880_at   | AT5G46200 | Transmembrane protein;(source:Araport11). Expression induced by abiotic stressors such as ABA, drought, heat, light, NaCl, osmotic stress and wounding.                                                                                                                                                                                                                                                                                                                                                                                                                                         | 76.52  | 16.91  | 4.52 | 6.50E-06 | 5.49E-05 |
| 4237 | 7 | F2-3 vs. S2-3 | 259856_at   | AT1G68440 | Calcium-binding EF hand family protein;(source:Araport11)                                                                                                                                                                                                                                                                                                                                                                                                                                                                                                                                       | 74.05  | 16.43  | 4.51 | 5.00E-07 | 9.67E-06 |
| 4238 | 7 | F2-3 vs. S2-3 | 253833_at   | AT4G27790 | Major facilitator superfamily protein;(source:Araport11)                                                                                                                                                                                                                                                                                                                                                                                                                                                                                                                                        | 53.67  | 11.91  | 4.51 | 1.71E-05 | 1.09E-04 |
| 4239 | 7 | F2-3 vs. S2-3 | 255877_at   | AT2G40460 |                                                                                                                                                                                                                                                                                                                                                                                                                                                                                                                                                                                                 | 70.69  | 15.76  | 4.48 | 2.70E-06 | 3.02E-05 |

|      |   |               |                 |           |                                                                                                                                                                                                                                                                                                                                                                                                                                                              |         |        |      |          |          |
|------|---|---------------|-----------------|-----------|--------------------------------------------------------------------------------------------------------------------------------------------------------------------------------------------------------------------------------------------------------------------------------------------------------------------------------------------------------------------------------------------------------------------------------------------------------------|---------|--------|------|----------|----------|
| 4240 | 7 | F2-3 vs. S2-3 | 267293_at       | AT2G23810 | Member of TETRASPANIN family                                                                                                                                                                                                                                                                                                                                                                                                                                 | 387.42  | 86.74  | 4.47 | < 1e-07  | 2.96E-06 |
| 4241 | 7 | F2-3 vs. S2-3 | 248838_at       | AT5G46800 | Seedling lethal mutation; Mitochondrial Carnitine Acyl Carrier-Like Protein<br>Encodes a chloroplast beta-amylase. Is necessary for leaf starch breakdown in the absence of BAM3. Activity of BAM1 increases 4 days after osmotic stress. BAM1 has a higher temperature optimum than BAM3 (PMID:25293962).                                                                                                                                                   | 300.87  | 67.37  | 4.47 | < 1e-07  | 2.96E-06 |
| 4242 | 7 | F2-3 vs. S2-3 | 256861_at       | AT3G23920 |                                                                                                                                                                                                                                                                                                                                                                                                                                                              | 652.22  | 146.29 | 4.46 | 1.78E-04 | 6.03E-04 |
| 4243 | 7 | F2-3 vs. S2-3 | 250129_at       | AT5G16450 | Ribonuclease E inhibitor RraA/Dimethylmenaquinone methyltransferase;(source:Araport11)                                                                                                                                                                                                                                                                                                                                                                       | 713.49  | 161.31 | 4.42 | 3.00E-07 | 6.68E-06 |
| 4244 | 7 | F2-3 vs. S2-3 | 257119_at       | AT3G20190 | Leucine-rich repeat protein kinase family protein;(source:Araport11)                                                                                                                                                                                                                                                                                                                                                                                         | 50.37   | 11.47  | 4.39 | 7.00E-07 | 1.20E-05 |
| 4245 | 7 | F2-3 vs. S2-3 | 259277_at       | AT3G01180 | starch synthase 2;(source:Araport11)<br>Encodes a protein required for photosystem I assembly and stability. In cyanobacteria, loss of function mutation in this gene increases PSII/PSI ratio without any influence on photoautotrophic growth.                                                                                                                                                                                                             | 432.8   | 99.31  | 4.36 | 3.00E-07 | 6.68E-06 |
| 4246 | 7 | F2-3 vs. S2-3 | 245018_at       | ATCG00520 |                                                                                                                                                                                                                                                                                                                                                                                                                                                              | 279.39  | 64.14  | 4.36 | 6.00E-07 | 1.10E-05 |
| 4247 | 7 | F2-3 vs. S2-3 | 253373_at       | AT4G33150 | This is a splice variant of the LKR/SDH locus. It encodes a bifunctional polypeptide lysine-ketoglutarate reductase and saccharopine dehydrogenase involved in lysine degradation. There is another splice variant that encodes a mono saccharopine dehydrogenase protein. Gene expression is induced by abscisic acid, jasmonate, and under sucrose starvation.                                                                                             | 40.76   | 9.4    | 4.34 | 8.40E-06 | 6.65E-05 |
| 4248 | 7 | F2-3 vs. S2-3 | 252921_at       | AT4G39030 | Encodes an orphan multidrug and toxin extrusion transporter. Essential component of salicylic acid-dependent signaling for disease resistance. Member of the MATE-transporter family. Expression induced by salicylic acid. Mutants are salicylic acid-deficient.                                                                                                                                                                                            | 142.78  | 32.94  | 4.33 | 1.50E-06 | 2.00E-05 |
| 4249 | 7 | F2-3 vs. S2-3 | 249134_at       | AT5G43150 | elongation factor;(source:Araport11)                                                                                                                                                                                                                                                                                                                                                                                                                         | 65.16   | 15.06  | 4.33 | 1.64E-04 | 5.67E-04 |
| 4250 | 7 | F2-3 vs. S2-3 | 259275_at       | AT3G01060 | lysine-tRNA ligase;(source:Araport11)                                                                                                                                                                                                                                                                                                                                                                                                                        | 311.97  | 72.29  | 4.32 | 1.00E-06 | 1.54E-05 |
| 4251 | 7 | F2-3 vs. S2-3 | 264264_at       | AT1G09250 | basic helix-loop-helix (bHLH) DNA-binding superfamily protein;(source:Araport11)<br>Encodes a protein containing a UND, a U-box, and an ARM domain. This protein has E3 ubiquitin ligase activity. It is required for cell death and full resistance specified by Arabidopsis RPM1 and RPS4 resistance proteins against Pseudomonas syringae pv tomato. The mRNA is cell-to-cell mobile.                                                                     | 72.96   | 16.93  | 4.31 | 4.17E-05 | 2.09E-04 |
| 4252 | 7 | F2-3 vs. S2-3 | 259826_at       | AT1G29340 |                                                                                                                                                                                                                                                                                                                                                                                                                                                              | 336.84  | 78.35  | 4.3  | 1.17E-05 | 8.37E-05 |
| 4253 | 7 | F2-3 vs. S2-3 | 262291_at       | AT1G70790 | C2-domain ABA-related (CAR) protein, involved in the recruitment of ABA receptors to the plasma membrane to facilitate ABA signaling. Its stability and dynamic localization is regulated by LOT1.                                                                                                                                                                                                                                                           | 252.15  | 58.71  | 4.3  | 3.80E-06 | 3.79E-05 |
| 4254 | 7 | F2-3 vs. S2-3 | 262680_at       | AT1G75880 | SGNH hydrolase-type esterase superfamily protein;(source:Araport11)                                                                                                                                                                                                                                                                                                                                                                                          | 43.26   | 10.06  | 4.3  | 8.00E-07 | 1.32E-05 |
| 4255 | 7 | F2-3 vs. S2-3 | 266615_s_a<br>t | AT2G35660 | Encodes a member of a novel gene family with homology to known proteins involved in hydroxylation and oxidation of an aromatic ring.<br>Encodes a Type One Protein Phosphatase that acts as a nucleocytoplasmic negative regulator of tip growth. Mutants affect pollen germination, pollen tube growth, and root hair growth. It acts genetically downstream of ANX1 (AT3G04690) and ANX2 (AT5G28680) and is functionally redundant with TOPP8 (AT5G27840). | 247.73  | 57.67  | 4.3  | 4.50E-06 | 4.27E-05 |
| 4256 | 7 | F2-3 vs. S2-3 | 259109_at       | AT3G05580 | redundant with TOPP8 (AT5G27840).                                                                                                                                                                                                                                                                                                                                                                                                                            | 351.4   | 81.87  | 4.29 | 1.00E-06 | 1.54E-05 |
| 4257 | 7 | F2-3 vs. S2-3 | 253276_at       | AT4G34050 | Methyltransferase in the lignin biosynthetic pathway.<br>** Referred to as MIPS1 in Mitsuhashi et al 2008. Myo-inositol-1-phosphate synthase isoform 2. Expressed in leaf, root and silique. Immunolocalization experiments with an antibody recognizing MIPS1, MIPS2, and MIPS3 showed endosperm localization.                                                                                                                                              | 1028.07 | 242.18 | 4.24 | 4.10E-06 | 4.02E-05 |
| 4258 | 7 | F2-3 vs. S2-3 | 263433_at       | AT2G22240 | MIPS1, MIPS2, and MIPS3 showed endosperm localization.                                                                                                                                                                                                                                                                                                                                                                                                       | 852.65  | 201.66 | 4.23 | 7.00E-07 | 1.20E-05 |
| 4259 | 7 | F2-3 vs. S2-3 | 254762_at       | AT4G13230 | Late embryogenesis abundant protein (LEA) family protein;(source:Araport11)                                                                                                                                                                                                                                                                                                                                                                                  | 70.15   | 16.58  | 4.23 | 4.27E-05 | 2.12E-04 |
| 4260 | 7 | F2-3 vs. S2-3 | 250676_at       | AT5G06320 | encodes a protein whose sequence is similar to tobacco hairpin-induced gene (HIN1) and Arabidopsis non-race specific disease resistance gene (NDR1). Expression of this gene is induced by cucumber mosaic virus, spermine and Pseudomonas syringae pv. tomato DC3000. The gene product is localized to the plasma membrane.                                                                                                                                 | 300.4   | 70.95  | 4.23 | 5.60E-06 | 4.97E-05 |
| 4261 | 7 | F2-3 vs. S2-3 | 251668_at       | AT3G57010 | Calcium-dependent phosphotriesterase superfamily protein;(source:Araport11)                                                                                                                                                                                                                                                                                                                                                                                  | 189.57  | 44.92  | 4.22 | 1.02E-05 | 7.64E-05 |
| 4262 | 7 | F2-3 vs. S2-3 | 253872_at       | AT4G27410 | Encodes a NAC transcription factor induced in response to desiccation. It is localized to the nucleus and acts as a transcriptional activator in ABA-mediated dehydration response.<br>Encodes putative proliferating cell nuclear antigen involved in cell cycle regulation. May be sumoylated.                                                                                                                                                             | 117.06  | 27.76  | 4.22 | 4.80E-06 | 4.48E-05 |
| 4263 | 7 | F2-3 vs. S2-3 | 261080_at       | AT1G07370 |                                                                                                                                                                                                                                                                                                                                                                                                                                                              | 88.17   | 20.93  | 4.21 | 3.20E-06 | 3.37E-05 |
| 4264 | 7 | F2-3 vs. S2-3 | 245501_at       | AT4G15620 | Uncharacterized protein family (UPF0497);(source:Araport11)                                                                                                                                                                                                                                                                                                                                                                                                  | 93.76   | 22.32  | 4.2  | 6.00E-07 | 1.10E-05 |
| 4265 | 7 | F2-3 vs. S2-3 | 253666_at       | AT4G30270 | encodes a protein similar to endo xyloglucan transferase in sequence. It is also very similar to BRU1 in soybean, which is involved in brassinosteroid response.                                                                                                                                                                                                                                                                                             | 172.8   | 41.17  | 4.2  | 5.54E-05 | 2.55E-04 |

|      |   |               |                         |           |                                                                                                                                                                                                                                                                                                                                                                                                                                                                                                                                                                                                                                                                                                                                                                                                                                                                                                                                                                                                                                                                                                                                                                                                                                              |         |        |      |          |          |
|------|---|---------------|-------------------------|-----------|----------------------------------------------------------------------------------------------------------------------------------------------------------------------------------------------------------------------------------------------------------------------------------------------------------------------------------------------------------------------------------------------------------------------------------------------------------------------------------------------------------------------------------------------------------------------------------------------------------------------------------------------------------------------------------------------------------------------------------------------------------------------------------------------------------------------------------------------------------------------------------------------------------------------------------------------------------------------------------------------------------------------------------------------------------------------------------------------------------------------------------------------------------------------------------------------------------------------------------------------|---------|--------|------|----------|----------|
| 4266 | 7 | F2-3 vs. S2-3 | AFFX-Athal-GAPDH_5_s_at | AT3G04120 | encodes cytosolic GADPH (C subunit) involved in the glycolytic pathway but also interacts with H2O2 potentially placing it in a signalling cascade induced by ROS. The mRNA is cell-to-cell mobile.                                                                                                                                                                                                                                                                                                                                                                                                                                                                                                                                                                                                                                                                                                                                                                                                                                                                                                                                                                                                                                          | 220.76  | 52.68  | 4.19 | 1.60E-06 | 2.10E-05 |
| 4267 | 7 | F2-3 vs. S2-3 | 246304_at               | AT3G51840 | Encodes a short-chain acyl-CoA oxidase, which catalyzes the first step of peroxisomal fatty acid beta-oxidation during early, post-germinative growth in oilseed species. Null mutants virtually lack short-chain acyl-CoA and are resistant to 2,4-dichlorophenoxybutyric acid, which is converted to the herbicide and auxin analogue 2,4-dichlorophenoxyacetic acid by beta-oxidation. Despite the almost complete loss of short-chain activity, lipid catabolism and seedling growth and establishment was unaltered in the acx4 mutant. However, double mutants in acx3acx4 (acx3 encodes medium chain acyl CoA oxidase) were not viable and arrested during embryogenesis.                                                                                                                                                                                                                                                                                                                                                                                                                                                                                                                                                             | 686.83  | 163.74 | 4.19 | 1.00E-06 | 1.54E-05 |
| 4268 | 7 | F2-3 vs. S2-3 | 256835_at               | AT3G22890 | encodes ATP sulfurylase, the first enzyme in the sulfate assimilation pathway of Arabidopsis. It may also participate in selenium metabolism. The mRNA is cell-to-cell mobile.                                                                                                                                                                                                                                                                                                                                                                                                                                                                                                                                                                                                                                                                                                                                                                                                                                                                                                                                                                                                                                                               | 1442.88 | 345.86 | 4.17 | 8.00E-07 | 1.32E-05 |
| 4269 | 7 | F2-3 vs. S2-3 | 245700_at               | AT5G04180 | alpha carbonic anhydrase 3;(source:Araport11)                                                                                                                                                                                                                                                                                                                                                                                                                                                                                                                                                                                                                                                                                                                                                                                                                                                                                                                                                                                                                                                                                                                                                                                                | 49.12   | 11.81  | 4.16 | 4.21E-05 | 2.10E-04 |
| 4270 | 7 | F2-3 vs. S2-3 | 255365_at               | AT4G04040 | Phosphofructokinase family protein;(source:Araport11)                                                                                                                                                                                                                                                                                                                                                                                                                                                                                                                                                                                                                                                                                                                                                                                                                                                                                                                                                                                                                                                                                                                                                                                        | 478.12  | 115.99 | 4.12 | 3.70E-06 | 3.73E-05 |
| 4271 | 7 | F2-3 vs. S2-3 | 256524_at               | AT1G66200 | encodes a cytosolic glutamate synthetase, this enzyme has low affinity with substrate ammonium                                                                                                                                                                                                                                                                                                                                                                                                                                                                                                                                                                                                                                                                                                                                                                                                                                                                                                                                                                                                                                                                                                                                               | 206.68  | 50.5   | 4.09 | 2.30E-06 | 2.69E-05 |
| 4272 | 7 | F2-3 vs. S2-3 | 267319_at               | AT2G34660 | encodes a multidrug resistance-associated protein that is MgATP-energized glutathione S-conjugate pump. An ABC-type arsenite-phytochelatin transporter. The expression of this gene is upregulated by herbicide safeners such as benoxacor and fenclorim. The mRNA is cell-to-cell mobile.                                                                                                                                                                                                                                                                                                                                                                                                                                                                                                                                                                                                                                                                                                                                                                                                                                                                                                                                                   | 338.22  | 82.7   | 4.09 | 8.70E-06 | 6.82E-05 |
| 4273 | 7 | F2-3 vs. S2-3 | 266418_at               | AT2G38750 | Annexins are a family of calcium dependent membrane binding proteins though to be involved in Golgi mediated secretion. This is one of four annexins identified in Arabidopsis.                                                                                                                                                                                                                                                                                                                                                                                                                                                                                                                                                                                                                                                                                                                                                                                                                                                                                                                                                                                                                                                              | 276     | 67.52  | 4.09 | 6.09E-05 | 2.71E-04 |
| 4274 | 7 | F2-3 vs. S2-3 | 257886_at               | AT3G17060 | Pectin lyase-like superfamily protein;(source:Araport11)                                                                                                                                                                                                                                                                                                                                                                                                                                                                                                                                                                                                                                                                                                                                                                                                                                                                                                                                                                                                                                                                                                                                                                                     | 75.86   | 18.55  | 4.09 | 9.00E-07 | 1.44E-05 |
| 4275 | 7 | F2-3 vs. S2-3 | 257121_at               | AT3G20220 | SAUR-like auxin-responsive protein family;(source:Araport11)                                                                                                                                                                                                                                                                                                                                                                                                                                                                                                                                                                                                                                                                                                                                                                                                                                                                                                                                                                                                                                                                                                                                                                                 | 77.42   | 18.95  | 4.09 | 3.00E-07 | 6.68E-06 |
| 4276 | 7 | F2-3 vs. S2-3 | 266558_at               | AT2G23900 | Pectin lyase-like superfamily protein;(source:Araport11)                                                                                                                                                                                                                                                                                                                                                                                                                                                                                                                                                                                                                                                                                                                                                                                                                                                                                                                                                                                                                                                                                                                                                                                     | 60.53   | 14.82  | 4.08 | 3.22E-05 | 1.71E-04 |
| 4277 | 7 | F2-3 vs. S2-3 | 266673_at               | AT2G29630 | Encodes a protein involved in thiamin biosynthesis. The protein is an iron-sulfur cluster protein predicted to catalyze the conversion of 5-aminoimidazole ribonucleotide (AIR) to hydroxymethylpyrimidine (HMP) or hydroxymethylpyrimidine phosphate (HMP-P). A severe reduction of THIC levels in plants decreases vitamin B1 (thiamin diphosphate (TPP)) levels and also leads to changes in the levels of numerous other metabolites since so many primary metabolic enzymes require a TPP co-factor. thiC mutants are chlorotic and arrest in their development at the cotyledon stage. A N-terminal targeting sequence directs the THIC protein to the chloroplast stroma. A conserved TPP-binding site is located in the 3' UTR of the At2g29630.2 gene model, and is predicted to function as a riboswitch. The riboswitch controls the formation of transcripts with alternative 3' UTR lengths, which affect mRNA accumulation and protein production. THIC transcripts are observed in seedlings 5 or more days after germination, and light promotes the expression of this gene. Recessive mutant isolated by Redei. Leaves but not cotyledons white, lethal; restored to normal by thiamine or 2,5-dimethyl-4-aminopyrimidine. | 285.16  | 70.06  | 4.07 | 1.00E-07 | 2.96E-06 |
| 4278 | 7 | F2-3 vs. S2-3 | 254862_at               | AT4G12030 | Required for the biosynthesis of methionine-derived glucosinolates. Involved in the transport of 2-keto acids between chloroplasts and the cytosol.                                                                                                                                                                                                                                                                                                                                                                                                                                                                                                                                                                                                                                                                                                                                                                                                                                                                                                                                                                                                                                                                                          | 135.47  | 33.34  | 4.06 | 7.50E-06 | 6.08E-05 |
| 4279 | 7 | F2-3 vs. S2-3 | 254630_at               | AT4G18360 | Encodes a glycolate oxidase that modulates reactive oxygen species-mediated signal transduction during nonhost resistance.                                                                                                                                                                                                                                                                                                                                                                                                                                                                                                                                                                                                                                                                                                                                                                                                                                                                                                                                                                                                                                                                                                                   | 114.5   | 28.2   | 4.06 | 5.70E-06 | 5.00E-05 |
| 4280 | 7 | F2-3 vs. S2-3 | 251433_at               | AT3G59830 | Integrin-linked protein kinase family;(source:Araport11)                                                                                                                                                                                                                                                                                                                                                                                                                                                                                                                                                                                                                                                                                                                                                                                                                                                                                                                                                                                                                                                                                                                                                                                     | 57.96   | 14.32  | 4.05 | 1.20E-06 | 1.75E-05 |
| 4281 | 7 | F2-3 vs. S2-3 | 244902_at               | ATMG00650 | Encodes NADH dehydrogenase subunit 4L.                                                                                                                                                                                                                                                                                                                                                                                                                                                                                                                                                                                                                                                                                                                                                                                                                                                                                                                                                                                                                                                                                                                                                                                                       | 113.2   | 27.96  | 4.05 | 1.90E-06 | 2.37E-05 |
| 4282 | 7 | F2-3 vs. S2-3 | 245213_at               | AT1G44575 | Encoding PSII-S (CP22), a ubiquitous pigment-binding protein associated with photosystem II (PSII) of higher plants. Involved in nonphotochemical quenching rather than in photosynthesis. Mutant has a normal violaxanthin cycle but has a limited capacity of quenching singlet excited chlorophylls and is tolerant to lipid peroxidation.                                                                                                                                                                                                                                                                                                                                                                                                                                                                                                                                                                                                                                                                                                                                                                                                                                                                                                | 1276.8  | 316    | 4.04 | 1.40E-06 | 1.89E-05 |
| 4283 | 7 | F2-3 vs. S2-3 | 265441_at               | AT2G20870 | cell wall protein precursor;(source:Araport11)                                                                                                                                                                                                                                                                                                                                                                                                                                                                                                                                                                                                                                                                                                                                                                                                                                                                                                                                                                                                                                                                                                                                                                                               | 93.85   | 23.22  | 4.04 | 2.10E-06 | 2.53E-05 |

|      |   |               |            |           |                                                                                                                                                                                                                                                                                                                                                                                                                                                                                                                                                            |         |         |      |          |          |
|------|---|---------------|------------|-----------|------------------------------------------------------------------------------------------------------------------------------------------------------------------------------------------------------------------------------------------------------------------------------------------------------------------------------------------------------------------------------------------------------------------------------------------------------------------------------------------------------------------------------------------------------------|---------|---------|------|----------|----------|
| 4284 | 7 | F2-3 vs. S2-3 | 254874_at  | AT4G11570 | Encodes plastid localized protein involved in riboflavin biosynthesis. It dephosphorylates 5-amino-6-ribitylamino- 2,4(1H,3H) pyrimidinedione 5&#8242;-phosphate (ARPP) .                                                                                                                                                                                                                                                                                                                                                                                  | 535.13  | 132.47  | 4.04 | 2.00E-07 | 4.97E-06 |
| 4285 | 7 | F2-3 vs. S2-3 | 258312_at  | AT3G16170 | Encodes a malonyl-CoA synthetase that is localized to the cytosol and mitochondrion. AAE13 produces two transcripts one of which includes an N terminal mitochondrial targeting motif. Loss of function of the mtAAE13 product results in growth arrest and lethality.                                                                                                                                                                                                                                                                                     | 549.09  | 136.68  | 4.02 | 4.20E-05 | 2.10E-04 |
| 4286 | 7 | F2-3 vs. S2-3 | 263709_at  | AT1G09310 | plant/protein (Protein of unknown function, DUF538);(source:Araport11)                                                                                                                                                                                                                                                                                                                                                                                                                                                                                     | 136.95  | 34.16   | 4.01 | 8.00E-07 | 1.32E-05 |
| 4287 | 7 | F2-3 vs. S2-3 | 259098_at  | AT3G04790 | Ribose 5-phosphate isomerase, type A protein;(source:Araport11)                                                                                                                                                                                                                                                                                                                                                                                                                                                                                            | 148.98  | 37.14   | 4.01 | 7.60E-06 | 6.14E-05 |
| 4288 | 7 | F2-3 vs. S2-3 | 245528_at  | AT4G15530 | Encodes a dual-targeted protein believed to act as a pyruvate, orthophosphate dikinase. These enzymes are normally associated with C4 photosynthesis which does not occur in Arabidopsis. However, PPKK may play a role in remobilizing nitrogen during leaf senescence in Arabidopsis. The product of the long transcript (.1 gene model) was shown to be targeted to the chloroplast, whereas the shorter transcript (no targeting sequence) accumulates in the cytosol. The two proteins were also found to be expressed in slightly different tissues. | 208.44  | 51.98   | 4.01 | 4.74E-05 | 2.28E-04 |
| 4289 | 7 | F2-3 vs. S2-3 | 249638_at  | AT5G36880 | Encodes a plastidic acetyl-coA synthetase. This enzyme plays a role in converting acetate to acetyl-coA in the plastids. It does not appear to be a major contributor to fatty acid biosynthesis based on mutant phenotypes. The enzyme seems to act as a monomer and may play an important role in preventing the toxic accumulation of fermentation products including acetaldehyde, acetate, and ethanol. It participates in the pyruvate dehydrogenase bypass pathway                                                                                  | 940.02  | 235.26  | 4    | 1.30E-06 | 1.81E-05 |
| 4290 | 7 | F2-3 vs. S2-3 | 253898_s_a | AT5G54810 | A.thaliana tryptophan synthase beta subunit (trpB)                                                                                                                                                                                                                                                                                                                                                                                                                                                                                                         | 1536.04 | 384.4   | 4    | 1.79E-05 | 1.11E-04 |
| 4291 | 7 | F2-3 vs. S2-3 | 258415_at  | AT3G17390 | S-adenosylmethionine synthetase                                                                                                                                                                                                                                                                                                                                                                                                                                                                                                                            | 2487.45 | 623.67  | 3.99 | 1.10E-06 | 1.64E-05 |
| 4292 | 7 | F2-3 vs. S2-3 | 245699_at  | AT5G04250 | Cysteine proteinases superfamily protein;(source:Araport11)                                                                                                                                                                                                                                                                                                                                                                                                                                                                                                | 192.38  | 48.29   | 3.98 | 7.30E-06 | 6.00E-05 |
| 4293 | 7 | F2-3 vs. S2-3 | 267168_at  | AT2G37770 | Encodes an NADPH-dependent aldo-keto reductase that can act on a wide variety of substrates in vitro including saturated and unsaturated aldehydes, steroids, and sugars. GFP-tagged AKR4C9 localizes to the chloroplast where it may play a role in detoxifying reactive carbonyl compounds that threaten to impair the photosynthetic process. Transcript levels for this gene are up-regulated in response to cold, salt, and drought stress.                                                                                                           | 66.61   | 16.86   | 3.95 | 2.90E-06 | 3.14E-05 |
| 4294 | 7 | F2-3 vs. S2-3 | 267035_at  | AT2G38400 | alanine:glyoxylate aminotransferase 2 homolog (AGT3) mRNA, Encodes a anthocyanin 3-O-glucoside: 2"-O-xylosyl-transferase involved in anthocyanin modification that converts cyanidin 3-O-glucoside to cyanidin 3-O-xylosyl(1->2)glucoside. Its preferred sugar donor is UDP-xylose.                                                                                                                                                                                                                                                                        | 332.63  | 84.31   | 3.95 | 2.26E-05 | 1.32E-04 |
| 4295 | 7 | F2-3 vs. S2-3 | 248185_at  | AT5G54060 | Wound-responsive family protein;(source:Araport11)                                                                                                                                                                                                                                                                                                                                                                                                                                                                                                         | 173.07  | 44.03   | 3.93 | 1.62E-05 | 1.04E-04 |
| 4296 | 7 | F2-3 vs. S2-3 | 261144_s_a | AT1G19660 | Heat shock protein 70 (Hsp 70) family protein;(source:Araport11)                                                                                                                                                                                                                                                                                                                                                                                                                                                                                           | 1123.69 | 287.53  | 3.91 | 4.00E-07 | 8.26E-06 |
| 4297 | 7 | F2-3 vs. S2-3 | 258979_at  | AT3G09440 | encodes a phloem lectin, similar to phloem lectin in cucumber and celery. Gene is expressed in the phloem, predominantly in the companion cells. The mRNA is cell-to-cell mobile.                                                                                                                                                                                                                                                                                                                                                                          | 956.98  | 244.86  | 3.91 | 3.10E-06 | 3.28E-05 |
| 4298 | 7 | F2-3 vs. S2-3 | 254551_at  | AT4G19840 | Encodes a cytosolic ascorbate peroxidase APX6. Ascorbate peroxidases are enzymes that scavenge hydrogen peroxide in plant cells. Eight types of APX have been described for Arabidopsis: three cytosolic (APX1, APX2, APX6), two chloroplastic types (stromal sAPX, thylakoid tAPX), and three microsomal (APX3, APX4, APX5) isoforms.                                                                                                                                                                                                                     | 150.73  | 38.52   | 3.91 | 2.60E-06 | 2.94E-05 |
| 4299 | 7 | F2-3 vs. S2-3 | 253477_at  | AT4G32320 | Encodes an aspartic proteinase that forms a heterodimer and is stable over a broad pH range (ph 3-8).                                                                                                                                                                                                                                                                                                                                                                                                                                                      | 130.25  | 33.36   | 3.9  | 2.00E-07 | 4.97E-06 |
| 4300 | 7 | F2-3 vs. S2-3 | 264344_at  | AT1G11910 | Encodes a protein similar to the antifungal chitin-binding protein hevein from rubber tree latex. mRNA levels increase in response to ethylene and turnip crinkle virus infection. The mRNA is cell-to-cell mobile.                                                                                                                                                                                                                                                                                                                                        | 4334.17 | 1119.48 | 3.87 | 1.10E-06 | 1.64E-05 |
| 4301 | 7 | F2-3 vs. S2-3 | 258791_at  | AT3G04720 | fructose-bisphosphate aldolase 1;(source:Araport11)                                                                                                                                                                                                                                                                                                                                                                                                                                                                                                        | 127.46  | 32.94   | 3.87 | 5.00E-07 | 9.67E-06 |
| 4302 | 7 | F2-3 vs. S2-3 | 263761_at  | AT2G21330 | Encodes a peroxisomal protein involved in the activation of fatty acids through esterification with CoA. At5g63380 preferentially activates fatty acids with increased chain length (C9:0 to C8:0) and thus shares characteristics with long-chain fatty acyl-CoA synthases. Also able to catalyze the conversion of OPDA to its CoA ester and is therefore thought to be involved in the peroxisomal &#946;-oxidation steps of jasmonic acid biosynthesis.                                                                                                | 912.65  | 236.24  | 3.86 | 6.00E-07 | 1.10E-05 |
| 4303 | 7 | F2-3 vs. S2-3 | 247380_at  | AT5G63380 |                                                                                                                                                                                                                                                                                                                                                                                                                                                                                                                                                            | 342.76  | 88.89   | 3.86 | 2.00E-07 | 4.97E-06 |



|      |   |               |           |           |                                                                                                                                                                                                                                                                                                                                                                                                                                                                                                                                                                                                                    |         |        |      |          |          |
|------|---|---------------|-----------|-----------|--------------------------------------------------------------------------------------------------------------------------------------------------------------------------------------------------------------------------------------------------------------------------------------------------------------------------------------------------------------------------------------------------------------------------------------------------------------------------------------------------------------------------------------------------------------------------------------------------------------------|---------|--------|------|----------|----------|
| 4304 | 7 | F2-3 vs. S2-3 | 264400_at | AT1G61800 | glucose6-Phosphate/phosphate transporter 2. Expression is upregulated in the shoot of cax1/cax3 mutant. The mRNA is cell-to-cell mobile.                                                                                                                                                                                                                                                                                                                                                                                                                                                                           | 3591.61 | 936.05 | 3.84 | 1.00E-06 | 1.54E-05 |
| 4305 | 7 | F2-3 vs. S2-3 | 246279_at | AT4G36740 | Encodes a homeodomain leucine zipper class I (HD-Zip I) protein.                                                                                                                                                                                                                                                                                                                                                                                                                                                                                                                                                   | 51.48   | 13.42  | 3.84 | 1.40E-06 | 1.89E-05 |
| 4306 | 7 | F2-3 vs. S2-3 | 250350_at | AT5G12010 | nuclease;(source:Araport11)                                                                                                                                                                                                                                                                                                                                                                                                                                                                                                                                                                                        | 208.23  | 54.2   | 3.84 | 8.00E-07 | 1.32E-05 |
| 4307 | 7 | F2-3 vs. S2-3 | 259520_at | AT1G12320 | ankyrin repeat/KH domain protein (DUF1442);(source:Araport11)<br>Encodes flavanone 3-hydroxylase that is coordinately expressed with chalcone synthase and chalcone isomerases. Regulates flavonoid biosynthesis. Not responsive to auxin or ethylene stimulus (qRT-PCR).                                                                                                                                                                                                                                                                                                                                          | 52.02   | 13.57  | 3.83 | 6.00E-07 | 1.10E-05 |
| 4308 | 7 | F2-3 vs. S2-3 | 252123_at | AT3G51240 | Encodes a chloroplast-targeted Hsp101 homologue. Functions as a molecular chaperone involved in plastid differentiation mediating internal thylakoid membrane formation and conferring thermotolerance to chloroplasts during heat stress. APG6 is constitutively expressed in the root tips, the organ boundary region, the reproductive tissues of mature plants where plastids exist as proplastids, and slightly in the stems and leaves. APG6 expression is upregulated in response to heat shock in various organs, but not in response to other abiotic stresses. Apg6 mutants have a pale-green phenotype. | 813.52  | 212.2  | 3.83 | 2.30E-06 | 2.69E-05 |
| 4309 | 7 | F2-3 vs. S2-3 | 246554_at | AT5G15450 | Encodes a high-affinity, proton-dependent glucosinolate-specific transporter that is crucial for the transport of both methionine- and tryptophan-derived glucosinolates to seeds. Encodes glutathione transferase belonging to the tau class of GSTs. Naming convention according to Wagner et al. (2002).                                                                                                                                                                                                                                                                                                        | 361.96  | 94.6   | 3.83 | 1.13E-04 | 4.30E-04 |
| 4310 | 7 | F2-3 vs. S2-3 | 247440_at | AT5G62680 | Encodes EXLB1 (expansin-like B1), a member of the expansin family.                                                                                                                                                                                                                                                                                                                                                                                                                                                                                                                                                 | 92.79   | 24.25  | 3.83 | 1.50E-06 | 2.00E-05 |
| 4311 | 7 | F2-3 vs. S2-3 | 260805_at | AT1G78320 | encodes a gene similar to cellulose synthase The mRNA is cell-to-cell mobile.                                                                                                                                                                                                                                                                                                                                                                                                                                                                                                                                      | 82.84   | 21.78  | 3.8  | 2.00E-07 | 4.97E-06 |
| 4312 | 7 | F2-3 vs. S2-3 | 245463_at | AT4G17030 |                                                                                                                                                                                                                                                                                                                                                                                                                                                                                                                                                                                                                    | 86.44   | 22.78  | 3.79 | 1.03E-05 | 7.67E-05 |
| 4313 | 7 | F2-3 vs. S2-3 | 257071_at | AT3G28180 | GDLS-motif esterase/acyltransferase/lipase. Enzyme group with broad substrate specificity that may catalyze acyltransfer or hydrolase reactions with lipid and non-lipid substrates. Encodes a regulatory subunit of the mitochondrially-localized NAD <sup>+</sup> dependent isocitrate dehydrogenase. Encodes one of the homologs of the yeast CCR4-associated factor 1: AT3G44260 (CAF1a), AT5G22250 (CAF1b). Has mRNA deadenylation activity. Also plays a role in plant defense responses.                                                                                                                    | 63.26   | 16.75  | 3.78 | 3.00E-07 | 6.68E-06 |
| 4314 | 7 | F2-3 vs. S2-3 | 252363_at | AT3G48460 | Encodes a member of the SWEET sucrose efflux transporter family proteins.                                                                                                                                                                                                                                                                                                                                                                                                                                                                                                                                          | 48.07   | 12.71  | 3.78 | 1.00E-06 | 1.54E-05 |
| 4315 | 7 | F2-3 vs. S2-3 | 253196_at | AT4G35260 | Encodes a cysteine desulfurase whose activity is dependent on AtSufE activation. It requires pyridoxal phosphate (PLP) for proper folding. Its catalytic efficiency is increase three-fold in the presence of AtFh (frataxin).                                                                                                                                                                                                                                                                                                                                                                                     | 757.91  | 200.51 | 3.78 | 1.61E-05 | 1.04E-04 |
| 4316 | 7 | F2-3 vs. S2-3 | 249928_at | AT5G22250 |                                                                                                                                                                                                                                                                                                                                                                                                                                                                                                                                                                                                                    | 124.98  | 33.25  | 3.76 | 8.00E-07 | 1.32E-05 |
| 4317 | 7 | F2-3 vs. S2-3 | 245982_at | AT5G13170 | Encodes a member of a novel plant protein family containing a PDZ, a K-box, and a TPR motif. mRNA but not protein levels decrease after wounding. ZKT is phosphorylated at Thr and Ser residues after wounding. The mRNA is cell-to-cell mobile.                                                                                                                                                                                                                                                                                                                                                                   | 135.64  | 36.13  | 3.75 | 1.30E-06 | 1.81E-05 |
| 4318 | 7 | F2-3 vs. S2-3 | 247164_at | AT5G65720 | Encodes a protein with glyoxylate aminotransferase activity. It can act on a number of different small substrates and amino acids in vitro.                                                                                                                                                                                                                                                                                                                                                                                                                                                                        | 278.89  | 74.4   | 3.75 | 2.58E-05 | 1.46E-04 |
| 4319 | 7 | F2-3 vs. S2-3 | 265073_at | AT1G55480 | FAD/NAD(P)-binding oxidoreductase family protein;(source:Araport11)                                                                                                                                                                                                                                                                                                                                                                                                                                                                                                                                                | 300.62  | 80.65  | 3.73 | 5.40E-06 | 4.85E-05 |
| 4320 | 7 | F2-3 vs. S2-3 | 260309_at | AT1G70580 | Encodes LEA4-5, a member of the Late Embryogenesis Abundant (LEA) proteins which typically accumulate in response to low water availability conditions imposed during development or by the environment. Most of the diverse set of LEA proteins can be grouped according to properties such as high hydrophilicity and high content of glycine or other small amino acids in what has been termed hydrophilins. LEA4-5 protects enzyme activities from the adverse effects induced by freeze-thaw cycles in vitro.                                                                                                | 350.2   | 93.96  | 3.73 | 5.00E-07 | 9.67E-06 |
| 4321 | 7 | F2-3 vs. S2-3 | 252671_at | AT3G44190 | Encodes a peroxisomal citrate synthase that is expressed throughout seedling and shoot development. Encodes an expansin. Naming convention from the Expansin Working Group (Kende et al, 2004. Plant Mol Bio)                                                                                                                                                                                                                                                                                                                                                                                                      | 196.79  | 52.75  | 3.73 | 2.10E-06 | 2.53E-05 |
| 4322 | 7 | F2-3 vs. S2-3 | 250648_at | AT5G06760 | Glycosyl hydrolase family protein;(source:Araport11)                                                                                                                                                                                                                                                                                                                                                                                                                                                                                                                                                               | 144.78  | 38.94  | 3.72 | 9.00E-07 | 1.44E-05 |
| 4323 | 7 | F2-3 vs. S2-3 | 263986_at | AT2G42790 |                                                                                                                                                                                                                                                                                                                                                                                                                                                                                                                                                                                                                    | 431.14  | 116.15 | 3.71 | 5.47E-05 | 2.53E-04 |
| 4324 | 7 | F2-3 vs. S2-3 | 258003_at | AT3G29030 |                                                                                                                                                                                                                                                                                                                                                                                                                                                                                                                                                                                                                    | 548.66  | 147.73 | 3.71 | 5.90E-06 | 5.12E-05 |
| 4325 | 7 | F2-3 vs. S2-3 | 251228_at | AT3G62710 |                                                                                                                                                                                                                                                                                                                                                                                                                                                                                                                                                                                                                    | 69.85   | 18.84  | 3.71 | 3.12E-05 | 1.67E-04 |

|      |   |               |            |           |                                                                                                                                                                                                                                                                                                                                                                                                                                                     |         |        |      |          |          |
|------|---|---------------|------------|-----------|-----------------------------------------------------------------------------------------------------------------------------------------------------------------------------------------------------------------------------------------------------------------------------------------------------------------------------------------------------------------------------------------------------------------------------------------------------|---------|--------|------|----------|----------|
| 4326 | 7 | F2-3 vs. S2-3 | 266939_at  | AT2G18960 | Encodes a plasma membrane proton ATPase. Mutants have a reduced ability to close their stomata in response to drought and blue light, and are affected in stomatal but not seed responsiveness to ABA. It is the major isoform involved in the blue light mediated stomatal response. The mRNA is cell-to-cell mobile.                                                                                                                              | 2057.14 | 557.1  | 3.69 | 1.40E-06 | 1.89E-05 |
| 4327 | 7 | F2-3 vs. S2-3 | 267429_at  | AT2G34850 | NAD(P)-binding Rossmann-fold superfamily protein;(source:Araport11)                                                                                                                                                                                                                                                                                                                                                                                 | 180.99  | 49.2   | 3.68 | 2.46E-05 | 1.41E-04 |
| 4328 | 7 | F2-3 vs. S2-3 | 250174_at  | AT5G14380 | Encodes an arabinogalactan protein that is expressed in pollen, pollen sac and pollen tube. Loss of AGP6 function results in decreased fertility due to defects in pollen tube growth.                                                                                                                                                                                                                                                              | 64.77   | 17.59  | 3.68 | 1.07E-04 | 4.12E-04 |
| 4329 | 7 | F2-3 vs. S2-3 | 264289_at  | AT1G61890 | MATE efflux family protein;(source:Araport11)                                                                                                                                                                                                                                                                                                                                                                                                       | 224.89  | 61.2   | 3.67 | 2.51E-04 | 7.75E-04 |
| 4330 | 7 | F2-3 vs. S2-3 | 245745_at  | AT1G51110 | localized to chloroplasts<br>Encodes adenosine-5'-phosphosulfate kinase. Provides activated sulfate for sulfation of secondary metabolites, including the glucosinolates. Essential for pollen viability. The mRNA is cell-to-cell mobile.                                                                                                                                                                                                          | 48.69   | 13.32  | 3.66 | 1.31E-05 | 9.05E-05 |
| 4331 | 7 | F2-3 vs. S2-3 | 267112_at  | AT2G14750 | Encodes a chloroplast localized H <sup>+</sup> /glucose antiporter.                                                                                                                                                                                                                                                                                                                                                                                 | 135.03  | 36.98  | 3.65 | 1.22E-05 | 8.58E-05 |
| 4332 | 7 | F2-3 vs. S2-3 | 247709_at  | AT5G59250 | alpha/beta-Hydrolases superfamily protein;(source:Araport11)                                                                                                                                                                                                                                                                                                                                                                                        | 261.04  | 71.55  | 3.65 | 2.40E-06 | 2.77E-05 |
| 4333 | 7 | F2-3 vs. S2-3 | 261032_at  | AT1G17430 |                                                                                                                                                                                                                                                                                                                                                                                                                                                     | 250.41  | 68.95  | 3.63 | 3.10E-06 | 3.28E-05 |
| 4334 | 7 | F2-3 vs. S2-3 | 257217_at  | AT3G14940 | Encodes a cytosolic phosphoenolpyruvate carboxylase (PEPC) that has activity when expressed in E.coli. Its mRNA is most abundantly expressed in roots and siliques. PPC3 belongs to the plant-type PEPC family. It can form an enzymatically active complex with a castor bean ortholog of PPC4, which encodes a bacterial-type PEPC. The mRNA is cell-to-cell mobile.                                                                              | 49.8    | 13.7   | 3.63 | 1.00E-06 | 1.54E-05 |
| 4335 | 7 | F2-3 vs. S2-3 | 252130_at  | AT3G50820 | Encodes a protein which is an extrinsic subunit of photosystem II and which has been proposed to play a central role in stabilization of the catalytic manganese cluster. In <i>Arabidopsis thaliana</i> the PsbO proteins are encoded by two genes: <i>psbO1</i> and <i>psbO2</i> . PsbO2 is the minor isoform in the wild-type. Mutants defective in this gene have been shown to be affected in the dephosphorylation of the D1 protein of PSII. | 875.3   | 241.03 | 3.63 | 5.12E-05 | 2.42E-04 |
| 4336 | 7 | F2-3 vs. S2-3 | 267489_s_a | AT4G30100 | P-loop containing nucleoside triphosphate hydrolases superfamily protein;(source:Araport11)                                                                                                                                                                                                                                                                                                                                                         | 47.91   | 13.22  | 3.62 | 3.57E-04 | 1.03E-03 |
| 4337 | 7 | F2-3 vs. S2-3 | 262022_at  | AT1G35490 | bZIP family transcription factor;(source:Araport11)<br>cysteine proteinase precursor-like protein/ dehydration stress-responsive gene (RD21). Has been shown to have peptide ligase activity and protease activity in vitro. RD21 is involved in immunity to the necrotrophic fungal pathogen <i>Botrytis cinerea</i> . Activity detected in root, leaf, flower and cell culture.                                                                   | 33.7    | 9.33   | 3.61 | 1.08E-04 | 4.16E-04 |
| 4338 | 7 | F2-3 vs. S2-3 | 245803_at  | AT1G47128 |                                                                                                                                                                                                                                                                                                                                                                                                                                                     | 1654.89 | 457.83 | 3.61 | 4.00E-07 | 8.26E-06 |
| 4339 | 7 | F2-3 vs. S2-3 | 255622_at  | AT4G01070 | the glucosyltransferase (UGT72B1) is involved in metabolizing xenobiotica (chloroaniline and chlorophenole). Comparison between wild type and knock-out mutant demonstrates the central role of this gene for metabolizing chloroaniline but significantly less for chlorophenole. The glucosyltransferase preferred UDP-xylose over UDP-glucose indicating its (additional) functioning as a xylosyltransferase in planta                          | 74.74   | 20.7   | 3.61 | 1.06E-05 | 7.84E-05 |
| 4340 | 7 | F2-3 vs. S2-3 | 252740_at  | AT3G43270 | Plant invertase/pectin methylesterase inhibitor superfamily;(source:Araport11)                                                                                                                                                                                                                                                                                                                                                                      | 55.5    | 15.4   | 3.6  | 1.80E-06 | 2.29E-05 |
| 4341 | 7 | F2-3 vs. S2-3 | 246596_at  | AT5G14740 | Encodes a beta carbonic anhydrase likely to be localized in the cytoplasm. Expression of its mRNA is seen in etiolated seedlings and points to a possible nonphotosynthetic role for this isoform.                                                                                                                                                                                                                                                  | 58.79   | 16.45  | 3.57 | 4.50E-06 | 4.27E-05 |
| 4342 | 7 | F2-3 vs. S2-3 | 258962_at  | AT3G10570 | member of CYP77A                                                                                                                                                                                                                                                                                                                                                                                                                                    | 124.66  | 35.2   | 3.54 | 1.00E-06 | 1.54E-05 |
| 4343 | 7 | F2-3 vs. S2-3 | 264558_at  | AT1G09600 | Protein kinase superfamily protein;(source:Araport11)                                                                                                                                                                                                                                                                                                                                                                                               | 54.58   | 15.46  | 3.53 | 2.30E-06 | 2.69E-05 |
| 4344 | 7 | F2-3 vs. S2-3 | 266021_at  | AT2G05910 | LURP-one-like protein (DUF567);(source:Araport11)                                                                                                                                                                                                                                                                                                                                                                                                   | 220.88  | 62.6   | 3.53 | 3.00E-06 | 3.23E-05 |
| 4345 | 7 | F2-3 vs. S2-3 | 258599_at  | AT3G04520 | Encodes a threonine aldolase, involved in threonine degradation to glycine. Expressed in vascular tissue through out the plant.                                                                                                                                                                                                                                                                                                                     | 222.7   | 63.01  | 3.53 | 3.00E-07 | 6.68E-06 |
| 4346 | 7 | F2-3 vs. S2-3 | 259231_at  | AT3G11410 | Encodes protein phosphatase 2C. Negative regulator of ABA signalling. Expressed in seeds during germination. mRNA up-regulated by drought and ABA.                                                                                                                                                                                                                                                                                                  | 428.26  | 121.31 | 3.53 | 5.50E-06 | 4.90E-05 |
| 4347 | 7 | F2-3 vs. S2-3 | 248534_at  | AT5G50030 | Plant invertase/pectin methylesterase inhibitor superfamily protein;(source:Araport11)                                                                                                                                                                                                                                                                                                                                                              | 54.82   | 15.52  | 3.53 | 1.00E-05 | 7.51E-05 |
| 4348 | 7 | F2-3 vs. S2-3 | 256075_at  | AT1G18150 | Encodes mitogen-activated protein kinase 8 (MPK8). MPK8 connects protein phosphorylation, Ca <sup>2+</sup> , and ROS in the wound-signaling pathway.                                                                                                                                                                                                                                                                                                | 135.98  | 38.7   | 3.51 | 6.40E-06 | 5.42E-05 |

|      |   |               |            |           |                                                                                                                                                                                                                                                                                                                                                                                                                                                                                                                                                                                                                                                                                                                                                         |         |         |      |          |          |
|------|---|---------------|------------|-----------|---------------------------------------------------------------------------------------------------------------------------------------------------------------------------------------------------------------------------------------------------------------------------------------------------------------------------------------------------------------------------------------------------------------------------------------------------------------------------------------------------------------------------------------------------------------------------------------------------------------------------------------------------------------------------------------------------------------------------------------------------------|---------|---------|------|----------|----------|
| 4349 | 7 | F2-3 vs. S2-3 | 262597_at  | AT1G15470 | WD40 nucleoplasmic shuttling protein that positively regulates the Absciscic acid (ABA) response by interacting with and maintaining the stability of ABI5 in the nucleus. Nuclear export of XIW1 is XPO1-dependent. Involved in regulating seed germination, primary root growth, and drought stress resistance.                                                                                                                                                                                                                                                                                                                                                                                                                                       | 55.75   | 15.98   | 3.49 | 4.60E-06 | 4.33E-05 |
| 4350 | 7 | F2-3 vs. S2-3 | 245629_at  | AT1G56580 | Encodes SMALLER WITH VARIABLE BRANCHES (SVB), a protein with a conserved domain of unknown function (DUF538). The trichomes of the SVB mutants are smaller and exhibit branches of variable length and number.                                                                                                                                                                                                                                                                                                                                                                                                                                                                                                                                          | 272.56  | 78.09   | 3.49 | 1.10E-06 | 1.64E-05 |
| 4351 | 7 | F2-3 vs. S2-3 | 256891_at  | AT3G19030 | transcription initiation factor TFIID subunit 1b-like protein;(source:Araport11)                                                                                                                                                                                                                                                                                                                                                                                                                                                                                                                                                                                                                                                                        | 124.33  | 35.62   | 3.49 | 4.97E-05 | 2.36E-04 |
| 4352 | 7 | F2-3 vs. S2-3 | 263845_at  | AT2G37040 | Encodes PAL1, a phenylalanine ammonia-lyase. Arabidopsis has four PALs: AT2G37040 (PAL1), AT3G53260 (PAL2), AT5G04230 (PAL3) and AT3G10340 (PAL4). Encodes a member of the Arabidopsis LIM proteins: a family of actin bundlers with distinct expression patterns. WLIM1, WLIM2a, and WLIM2b are widely expressed, whereas PLIM2a, PLIM2b, and PLIM2c are predominantly expressed in pollen. Regulates actin cytoskeleton organization.                                                                                                                                                                                                                                                                                                                 | 115.41  | 33.29   | 3.47 | 6.96E-05 | 2.98E-04 |
| 4353 | 7 | F2-3 vs. S2-3 | 251361_at  | AT3G61230 | Pectin lyase-like superfamily protein;(source:Araport11)                                                                                                                                                                                                                                                                                                                                                                                                                                                                                                                                                                                                                                                                                                | 55.48   | 15.99   | 3.47 | 2.01E-04 | 6.64E-04 |
| 4354 | 7 | F2-3 vs. S2-3 | 260727_at  | AT1G48100 | Encodes AtTIP1;3, functions as water and urea channels in pollen.                                                                                                                                                                                                                                                                                                                                                                                                                                                                                                                                                                                                                                                                                       | 134.01  | 38.8    | 3.45 | 9.00E-06 | 7.00E-05 |
| 4355 | 7 | F2-3 vs. S2-3 | 255580_at  | AT4G01470 | CemaA-like proton extrusion protein-like protein;(source:Araport11)                                                                                                                                                                                                                                                                                                                                                                                                                                                                                                                                                                                                                                                                                     | 88.27   | 25.59   | 3.45 | 1.54E-05 | 1.01E-04 |
| 4356 | 7 | F2-3 vs. S2-3 | 245019_at  | ATCG00530 | chitinase;(source:Araport11)                                                                                                                                                                                                                                                                                                                                                                                                                                                                                                                                                                                                                                                                                                                            | 210.58  | 60.98   | 3.45 | 9.59E-04 | 2.21E-03 |
| 4357 | 7 | F2-3 vs. S2-3 | 260568_at  | AT2G43570 | Glutaredoxin family protein;(source:Araport11)                                                                                                                                                                                                                                                                                                                                                                                                                                                                                                                                                                                                                                                                                                          | 55.05   | 16.03   | 3.43 | 3.30E-06 | 3.44E-05 |
| 4358 | 7 | F2-3 vs. S2-3 | 256583_at  | AT3G28850 | Encodes CGR3 (cotton Golgi-related 3). CGR3 and a close homologue CGR2 have overlapping roles in pectin methylesterification and plant growth.                                                                                                                                                                                                                                                                                                                                                                                                                                                                                                                                                                                                          | 116.96  | 34.16   | 3.42 | 5.20E-06 | 4.73E-05 |
| 4359 | 7 | F2-3 vs. S2-3 | 247161_at  | AT5G65810 | The At2g36790 gene encodes a UDP-glucose:flavonol-3-O-glycoside-7-O-glucosyltransferase (UGT73C6)attaching a glucosyl residue to the 7-O-position of the flavonols kaempferol, quercetin and their 3-O-glycoside derivatives.                                                                                                                                                                                                                                                                                                                                                                                                                                                                                                                           | 503.45  | 147.08  | 3.42 | 4.00E-07 | 8.26E-06 |
| 4360 | 7 | F2-3 vs. S2-3 | 265200_s_a | AT2G36790 | Haloacid dehalogenase-like hydrolase (HAD) superfamily protein;(source:Araport11)                                                                                                                                                                                                                                                                                                                                                                                                                                                                                                                                                                                                                                                                       | 50.49   | 14.86   | 3.4  | 1.15E-05 | 8.34E-05 |
| 4361 | 7 | F2-3 vs. S2-3 | 252366_at  | AT3G48420 | PSII D2 protein                                                                                                                                                                                                                                                                                                                                                                                                                                                                                                                                                                                                                                                                                                                                         | 293.84  | 86.34   | 3.4  | 2.81E-05 | 1.54E-04 |
| 4362 | 7 | F2-3 vs. S2-3 | 245002_at  | ATCG00270 | GRIP/coiled-coil protein, putative (DUF1664);(source:Araport11)                                                                                                                                                                                                                                                                                                                                                                                                                                                                                                                                                                                                                                                                                         | 113.57  | 33.37   | 3.4  | 2.17E-05 | 1.29E-04 |
| 4363 | 7 | F2-3 vs. S2-3 | 264984_at  | AT1G27000 | Ku70-binding family protein;(source:Araport11)                                                                                                                                                                                                                                                                                                                                                                                                                                                                                                                                                                                                                                                                                                          | 199.74  | 58.88   | 3.39 | 1.50E-06 | 2.00E-05 |
| 4364 | 7 | F2-3 vs. S2-3 | 259056_at  | AT3G03420 | Encodes a specialized sigma factor that functions in regulation of plastid genes and is responsible for the light-dependent transcription at the psbD LRP. Activation of SIG5 is dependent upon blue light and mediated by cryptochromes.                                                                                                                                                                                                                                                                                                                                                                                                                                                                                                               | 63.14   | 18.6    | 3.39 | 7.00E-07 | 1.20E-05 |
| 4365 | 7 | F2-3 vs. S2-3 | 249769_at  | AT5G24120 | One of the three genes encoding subunit A of the trimeric enzyme ATP Citrate lyase                                                                                                                                                                                                                                                                                                                                                                                                                                                                                                                                                                                                                                                                      | 79.54   | 23.46   | 3.39 | 1.30E-05 | 9.01E-05 |
| 4366 | 7 | F2-3 vs. S2-3 | 264916_at  | AT1G60810 | Pectate lyase family protein;(source:Araport11)                                                                                                                                                                                                                                                                                                                                                                                                                                                                                                                                                                                                                                                                                                         | 2401.12 | 709.39  | 3.38 | 5.00E-07 | 9.67E-06 |
| 4367 | 7 | F2-3 vs. S2-3 | 261528_at  | AT1G14420 | Encodes a protein with phosphatidylinositol-4-phosphate 5-kinase activity that plays a role in pollen tip growth. The enzyme localizes to the apical plasma membrane and adjacent cytosolic region of pollen tubes. Overexpression of this gene leads to increased deposition of pectin in the cell wall at the tip of the pollen tube and causes altered pollen tube morphology.                                                                                                                                                                                                                                                                                                                                                                       | 32.38   | 9.6     | 3.37 | 7.94E-05 | 3.30E-04 |
| 4368 | 7 | F2-3 vs. S2-3 | 251711_at  | AT3G56960 | chloroplast-encoded gene for beta subunit of ATP synthase                                                                                                                                                                                                                                                                                                                                                                                                                                                                                                                                                                                                                                                                                               | 49.95   | 14.82   | 3.37 | 1.27E-05 | 8.84E-05 |
| 4369 | 7 | F2-3 vs. S2-3 | 245014_at  | ATCG00480 | HCF244 is a member of the atypical short-chain dehydrogenase/reductase superfamily, a modified group, which has lost enzyme activity.HCF244 interacts with unknown partners in a 200-400 kD membrane associated complex.                                                                                                                                                                                                                                                                                                                                                                                                                                                                                                                                | 5587.61 | 1659.36 | 3.37 | 1.90E-06 | 2.37E-05 |
| 4370 | 7 | F2-3 vs. S2-3 | 253197_at  | AT4G35250 | member of SYP12 Gene Family                                                                                                                                                                                                                                                                                                                                                                                                                                                                                                                                                                                                                                                                                                                             | 275.82  | 82.07   | 3.36 | 2.33E-05 | 1.35E-04 |
| 4371 | 7 | F2-3 vs. S2-3 | 264760_at  | AT1G61290 | Encodes a member of the SPA (suppressor of phyA-105) protein family (SPA1-SPA4). SPA proteins contain an N-terminal serine/threonine kinase-like motif followed by a coiled-coil structure and a C-terminal WD-repeat domain. SPA1 is a PHYA signaling intermediate, putative regulator of PHYA signaling pathway. Light responsive repressor of photomorphogenesis. Involved in regulating circadian rhythms and flowering time in plants. Under constant light, the abundance of SPA1 protein exhibited circadian regulation, whereas under constant darkness, SPA1 protein levels remained unchanged. In addition, the spa1-3 mutation slightly shortened circadian period of CCA1, TOC1/PRR1 and SPA1 transcript accumulation under constant light. | 79.35   | 23.71   | 3.35 | 5.00E-07 | 9.67E-06 |
| 4372 | 7 | F2-3 vs. S2-3 | 263779_at  | AT2G46340 | Encodes a sucrose hydrogen symporter that is induced by wounding.The mRNA is cell-to-cell mobile.                                                                                                                                                                                                                                                                                                                                                                                                                                                                                                                                                                                                                                                       | 199.18  | 59.58   | 3.34 | 4.40E-06 | 4.21E-05 |
| 4373 | 7 | F2-3 vs. S2-3 | 257939_at  | AT3G19930 |                                                                                                                                                                                                                                                                                                                                                                                                                                                                                                                                                                                                                                                                                                                                                         | 175.46  | 52.57   | 3.34 | 5.50E-06 | 4.90E-05 |

|      |   |               |            |           |                                                                                                                                                                                                                                                                                                                                                                                                                                                                                               |         |        |      |          |          |
|------|---|---------------|------------|-----------|-----------------------------------------------------------------------------------------------------------------------------------------------------------------------------------------------------------------------------------------------------------------------------------------------------------------------------------------------------------------------------------------------------------------------------------------------------------------------------------------------|---------|--------|------|----------|----------|
|      |   |               |            |           | Encodes one of four UDP-glucose dehydrogenase (UGD) genes. Mutation of this gene in combination with UGD3 leads to swollen plant cell walls and severe developmental defects associated with changes in pectic polysaccharides.                                                                                                                                                                                                                                                               | 246.38  | 73.71  | 3.34 | 1.54E-04 | 5.41E-04 |
| 4374 | 7 | F2-3 vs. S2-3 | 256745_at  | AT3G29360 |                                                                                                                                                                                                                                                                                                                                                                                                                                                                                               |         |        |      |          |          |
| 4375 | 7 | F2-3 vs. S2-3 | 246017_at  | AT5G10730 | NAD(P)-binding Rossmann-fold superfamily protein;(source:Araport11)                                                                                                                                                                                                                                                                                                                                                                                                                           | 196.02  | 58.74  | 3.34 | 1.35E-05 | 9.22E-05 |
| 4376 | 7 | F2-3 vs. S2-3 | 249710_at  | AT5G35630 | chloroplastic glutamine synthetase The mRNA is cell-to-cell mobile.                                                                                                                                                                                                                                                                                                                                                                                                                           | 642.43  | 192.29 | 3.34 | 1.43E-04 | 5.09E-04 |
| 4377 | 7 | F2-3 vs. S2-3 | 250854_at  | AT5G04710 | Plastid localized metalloaminopeptidase.                                                                                                                                                                                                                                                                                                                                                                                                                                                      | 76.04   | 22.86  | 3.33 | 7.42E-04 | 1.79E-03 |
|      |   |               |            |           | VAR1 contains a conserved motif for ATPase and a metalloprotease characteristic to FtsH proteins, and is targeted into chloroplasts. A VAR1-fusion protein synthesized in vitro exhibited ATPase activity and partial metalloprotease activity. This protein is located to the thylakoid membrane and forms a complex with VAR2. FtsH1 (VAR1) and FtsH5 are interchangeable in thylakoid membranes. Phosphorylation of this protein is dependent on calcium. The mRNA is cell-to-cell mobile. | 385.52  | 115.95 | 3.33 | 3.70E-06 | 3.73E-05 |
| 4378 | 7 | F2-3 vs. S2-3 | 249244_at  | AT5G42270 |                                                                                                                                                                                                                                                                                                                                                                                                                                                                                               |         |        |      |          |          |
| 4379 | 7 | F2-3 vs. S2-3 | 262682_at  | AT1G75900 | GDSL-motif esterase/acyltransferase/lipase. Enzyme group with broad substrate specificity that may catalyze acyltransfer or hydrolase reactions with lipid and non-lipid substrates.                                                                                                                                                                                                                                                                                                          | 243.28  | 73.32  | 3.32 | 4.22E-05 | 2.10E-04 |
| 4380 | 7 | F2-3 vs. S2-3 | 267590_at  | AT2G39700 | putative expansin. Naming convention from the Expansin Working Group (Kende et al, 2004. Plant Mol Bio). Involved in the formation of nematode-induced syncytia in roots of Arabidopsis thaliana.                                                                                                                                                                                                                                                                                             | 96.75   | 29.12  | 3.32 | 3.10E-06 | 3.28E-05 |
| 4381 | 7 | F2-3 vs. S2-3 | 263972_at  | AT2G42760 | DUF1685 family protein;(source:Araport11)                                                                                                                                                                                                                                                                                                                                                                                                                                                     | 254.33  | 76.57  | 3.32 | 6.70E-06 | 5.61E-05 |
|      |   |               |            |           | Identified by cloning the gene that corresponded to a purified protein having glyoxylate aminotransferase activity. Localized to the peroxisome and thought to be involved in photorespiration/ metabolic salvage pathway.                                                                                                                                                                                                                                                                    | 314.57  | 95.1   | 3.31 | 3.60E-06 | 3.67E-05 |
| 4382 | 7 | F2-3 vs. S2-3 | 262988_at  | AT1G23310 |                                                                                                                                                                                                                                                                                                                                                                                                                                                                                               |         |        |      |          |          |
| 4383 | 7 | F2-3 vs. S2-3 | 262998_at  | AT1G54280 | Encodes a member of the P4 subfamily of P-type ATPases expressed in the pollen plasma membrane. Double mutants with ALA7 display pollen and pollen tube defects.                                                                                                                                                                                                                                                                                                                              | 43.11   | 13.03  | 3.31 | 3.41E-04 | 9.84E-04 |
| 4384 | 7 | F2-3 vs. S2-3 | 260453_s_a | AT2G09970 | DUF1677 family protein (DUF1677);(source:Araport11)                                                                                                                                                                                                                                                                                                                                                                                                                                           | 62.68   | 18.94  | 3.31 | 6.38E-05 | 2.80E-04 |
| 4385 | 7 | F2-3 vs. S2-3 | 267358_at  | AT2G39890 | Encodes a proline transporter with affinity for gly betaine, proline and GABA. Protein is expressed in the vascular tissue, specifically the phloem.                                                                                                                                                                                                                                                                                                                                          | 172.1   | 51.94  | 3.31 | 1.27E-05 | 8.84E-05 |
| 4386 | 7 | F2-3 vs. S2-3 | 247925_at  | AT5G57560 | Encodes a cell wall-modifying enzyme, rapidly upregulated in response to environmental stimuli.                                                                                                                                                                                                                                                                                                                                                                                               | 117.52  | 35.48  | 3.31 | 2.10E-06 | 2.53E-05 |
| 4387 | 7 | F2-3 vs. S2-3 | 264016_at  | AT2G21220 | SAUR-like auxin-responsive protein family;(source:Araport11)                                                                                                                                                                                                                                                                                                                                                                                                                                  | 31.63   | 9.58   | 3.3  | 7.00E-07 | 1.20E-05 |
|      |   |               |            |           | Encodes a protein similar to glycerol kinase, which converts glycerol to glycerol 3-phosphate and performs a rate-limiting step in glycerol metabolism. This gene is required for both general and specific resistance against bacteria and fungi. Arabidopsis thaliana glycerol kinase (GLR1) mRNA. Involved in flagellin-induced non-host resistance to Pseudomonas. Coronatine partially suppresses flagellin-induced expression of NHO1.                                                  | 419.72  | 127.59 | 3.29 | 1.30E-05 | 9.01E-05 |
| 4388 | 7 | F2-3 vs. S2-3 | 260274_at  | AT1G80460 |                                                                                                                                                                                                                                                                                                                                                                                                                                                                                               |         |        |      |          |          |
| 4389 | 7 | F2-3 vs. S2-3 | 250690_at  | AT5G06530 | Encodes ABCG22, an ABC transporter gene. Mutation results in increased water transpiration and drought susceptibility.                                                                                                                                                                                                                                                                                                                                                                        | 81.85   | 25.01  | 3.27 | 2.74E-05 | 1.52E-04 |
|      |   |               |            |           | Encodes a leaf-type ferredoxin:NADP(H) oxidoreductase. It is present in both chloroplast stroma and thylakoid membranes but is more abundant in the stroma The mRNA is cell-to-cell mobile.                                                                                                                                                                                                                                                                                                   | 166.82  | 51.23  | 3.26 | 1.92E-04 | 6.38E-04 |
| 4390 | 7 | F2-3 vs. S2-3 | 261218_at  | AT1G20020 |                                                                                                                                                                                                                                                                                                                                                                                                                                                                                               |         |        |      |          |          |
| 4391 | 7 | F2-3 vs. S2-3 | 263595_at  | AT2G01890 | Encodes a purple acid phosphatase (PAP) belonging to the low molecular weight plant PAP group.                                                                                                                                                                                                                                                                                                                                                                                                | 72.72   | 22.28  | 3.26 | 1.60E-06 | 2.10E-05 |
|      |   |               |            |           | Encodes an organellar (peroxisome, glyoxysome) 3-ketoacyl-CoA thiolase, involved in fatty acid b-oxidation during germination and subsequent seedling growth. Mutants have defects in glyoxysomal fatty acid beta-oxidation. EC2.3.1.16 thiolase.                                                                                                                                                                                                                                             | 1236.58 | 379.79 | 3.26 | 2.90E-06 | 3.14E-05 |
| 4392 | 7 | F2-3 vs. S2-3 | 245168_at  | AT2G33150 |                                                                                                                                                                                                                                                                                                                                                                                                                                                                                               |         |        |      |          |          |
| 4393 | 7 | F2-3 vs. S2-3 | 254809_at  | AT4G12410 | SAUR-like auxin-responsive protein family;(source:Araport11)                                                                                                                                                                                                                                                                                                                                                                                                                                  | 63.14   | 19.38  | 3.26 | 4.28E-04 | 1.17E-03 |
| 4394 | 7 | F2-3 vs. S2-3 | 253343_at  | AT4G33540 | metallo-beta-lactamase family protein;(source:Araport11)                                                                                                                                                                                                                                                                                                                                                                                                                                      | 75.05   | 23     | 3.26 | 1.06E-04 | 4.08E-04 |
| 4395 | 7 | F2-3 vs. S2-3 | 265194_at  | AT1G05010 | Encodes 1-aminocyclopropane-1-carboxylate oxidase                                                                                                                                                                                                                                                                                                                                                                                                                                             | 36.3    | 11.19  | 3.25 | 7.00E-07 | 1.20E-05 |
|      |   |               |            |           | encodes a putative NDP-L-rhamnose synthase, an enzyme required for the synthesis of the pectin rhamnogalacturonan I, the major component of Arabidopsis mucilage. Gene is involved in seed coat mucilage cell development. Mutant analyses suggest that MUM4 is required for complete mucilage synthesis, cytoplasmic rearrangement and seed coat development.                                                                                                                                | 194.86  | 59.9   | 3.25 | 2.10E-06 | 2.53E-05 |
| 4396 | 7 | F2-3 vs. S2-3 | 260985_at  | AT1G53500 |                                                                                                                                                                                                                                                                                                                                                                                                                                                                                               |         |        |      |          |          |

|      |   |               |            |           |                                                                                                                                                                                                                                                                                                                                                                                                                                                                                                                          |         |        |      |          |          |
|------|---|---------------|------------|-----------|--------------------------------------------------------------------------------------------------------------------------------------------------------------------------------------------------------------------------------------------------------------------------------------------------------------------------------------------------------------------------------------------------------------------------------------------------------------------------------------------------------------------------|---------|--------|------|----------|----------|
| 4397 | 7 | F2-3 vs. S2-3 | 265119_at  | AT1G62570 | belongs to the flavin-monooxygenase (FMO) family, encodes a glucosinolate S-oxygenase that catalyzes the conversion of methylthioalkyl glucosinolates to methylsulfinylalkyl glucosinolates The mRNA is cell-to-cell mobile.                                                                                                                                                                                                                                                                                             | 81.45   | 25.1   | 3.25 | 1.19E-05 | 8.49E-05 |
| 4398 | 7 | F2-3 vs. S2-3 | 262357_at  | AT1G73040 | Mannose-binding lectin superfamily protein;(source:Araport11)                                                                                                                                                                                                                                                                                                                                                                                                                                                            | 61.68   | 18.97  | 3.25 | 2.07E-05 | 1.24E-04 |
| 4399 | 7 | F2-3 vs. S2-3 | 245483_at  | AT4G16190 | Papain family cysteine protease;(source:Araport11)                                                                                                                                                                                                                                                                                                                                                                                                                                                                       | 500.96  | 154.47 | 3.24 | 2.80E-05 | 1.54E-04 |
| 4400 | 7 | F2-3 vs. S2-3 | 248163_at  | AT5G54510 | Encodes an IAA-amido synthase that conjugates Ala, Asp, Phe, and Trp to auxin. Lines overexpressing this gene accumulate IAA-ASP and are hypersensitive to several auxins. Identified as a dominant mutation that displays shorter hypocotyls in light grown plants when compared to wild type siblings. Protein is similar to auxin inducible gene from pea (GH3).                                                                                                                                                      | 120.93  | 37.49  | 3.23 | 1.30E-06 | 1.81E-05 |
| 4401 | 7 | F2-3 vs. S2-3 | 259544_at  | AT1G20620 | Catalase, catalyzes the breakdown of hydrogen peroxide (H2O2) into water and oxygen. The mRNA is cell-to-cell mobile.                                                                                                                                                                                                                                                                                                                                                                                                    | 1432.02 | 444.45 | 3.22 | 5.00E-06 | 4.58E-05 |
| 4402 | 7 | F2-3 vs. S2-3 | 261601_at  | AT1G49670 | molecular function has not been defined. Was shown involved in oxidative stress tolerance.                                                                                                                                                                                                                                                                                                                                                                                                                               | 91.46   | 28.37  | 3.22 | 1.20E-06 | 1.75E-05 |
| 4403 | 7 | F2-3 vs. S2-3 | 266359_at  | AT2G32260 | phosphorylcholine cytidyltransferase;(source:Araport11)                                                                                                                                                                                                                                                                                                                                                                                                                                                                  | 252.38  | 78.34  | 3.22 | 6.00E-07 | 1.10E-05 |
| 4404 | 7 | F2-3 vs. S2-3 | 262885_at  | AT1G64740 | alpha-tubulin expressed primarily in stamens and mature pollen                                                                                                                                                                                                                                                                                                                                                                                                                                                           | 370.87  | 115.66 | 3.21 | 1.81E-05 | 1.12E-04 |
| 4405 | 7 | F2-3 vs. S2-3 | 263241_at  | AT2G16500 | Encodes a arginine decarboxylase (ADC), a rate-limiting enzyme that catalyzes the first step of polyamine (PA) biosynthesis via ADC pathway in Arabidopsis thaliana. Arabidopsis genome has two ADC paralogs, ADC1 and ADC2. Double mutant analysis showed that ADC genes are essential for the production of PA, and are required for normal seed development. Promoter region of ADC1 contains 742-bp AT-rich transposable element, called AtATE, that belongs to the MITE families of repetitive elements.            | 79.39   | 24.71  | 3.21 | 5.69E-05 | 2.60E-04 |
| 4406 | 7 | F2-3 vs. S2-3 | 248751_at  | AT5G47540 | Mo25 family protein;(source:Araport11)                                                                                                                                                                                                                                                                                                                                                                                                                                                                                   | 223.7   | 69.78  | 3.21 | 6.09E-05 | 2.71E-04 |
| 4407 | 7 | F2-3 vs. S2-3 | 262917_at  | AT1G64800 | DNA binding / transcription factor;(source:Araport11)                                                                                                                                                                                                                                                                                                                                                                                                                                                                    | 37.96   | 11.86  | 3.2  | 9.45E-05 | 3.75E-04 |
| 4408 | 7 | F2-3 vs. S2-3 | 264970_at  | AT1G67280 | Encodes a Ni+ dependent glyoxylase.                                                                                                                                                                                                                                                                                                                                                                                                                                                                                      | 773.68  | 241.99 | 3.2  | 1.30E-06 | 1.81E-05 |
| 4409 | 7 | F2-3 vs. S2-3 | 245904_at  | AT5G11110 | Encodes a protein with putative sucrose-phosphate synthase activity.Involved in pollen exine formation.                                                                                                                                                                                                                                                                                                                                                                                                                  | 106.94  | 33.41  | 3.2  | 1.26E-04 | 4.64E-04 |
| 4410 | 7 | F2-3 vs. S2-3 | 248758_at  | AT5G47620 | RNA-binding (RRM/RBD/RNP motifs) family protein;(source:Araport11)                                                                                                                                                                                                                                                                                                                                                                                                                                                       | 423.91  | 132.65 | 3.2  | 1.40E-06 | 1.89E-05 |
| 4411 | 7 | F2-3 vs. S2-3 | 256015_at  | AT1G19150 | PSI type II chlorophyll a/b-binding protein (Lhca2*1) mRNA, The mRNA is cell-to-cell mobile.                                                                                                                                                                                                                                                                                                                                                                                                                             | 231.45  | 72.64  | 3.19 | 5.40E-06 | 4.85E-05 |
| 4412 | 7 | F2-3 vs. S2-3 | 252327_at  | AT3G48740 | Encodes a member of the SWEET sucrose efflux transporter family proteins.                                                                                                                                                                                                                                                                                                                                                                                                                                                | 152.97  | 47.9   | 3.19 | 4.84E-05 | 2.31E-04 |
| 4413 | 7 | F2-3 vs. S2-3 | 252134_at  | AT3G50910 | netrin receptor DCC;(source:Araport11)                                                                                                                                                                                                                                                                                                                                                                                                                                                                                   | 429.07  | 134.99 | 3.18 | 4.86E-05 | 2.32E-04 |
| 4414 | 7 | F2-3 vs. S2-3 | 245431_at  | AT4G17080 | Histone H3 K4-specific methyltransferase SET7/9 family protein;(source:Araport11)                                                                                                                                                                                                                                                                                                                                                                                                                                        | 61.81   | 19.46  | 3.18 | 1.22E-05 | 8.58E-05 |
| 4415 | 7 | F2-3 vs. S2-3 | 245928_s_a | AT5G24780 | encodes an acid phosphatase similar to soybean vegetative storage proteins. Gene expression is induced by wounding and jasmonic acid.                                                                                                                                                                                                                                                                                                                                                                                    | 2260.39 | 710.31 | 3.18 | 2.70E-06 | 3.02E-05 |
| 4416 | 7 | F2-3 vs. S2-3 | 252011_at  | AT3G52720 | Encodes an alpha carbonic anhydrase (CAH1) located in the chloroplast stroma. Most chloroplast proteins are encoded by the nuclear genome and imported with the help of sorting signals that are intrinsic parts of the polypeptides. CAH1 takes an alternative route through the secretory pathway, and becomes N-glycosylated before entering the chloroplast. Glycosylation and intra-molecular disulfide bridge formation are necessary for the correct folding, ER export, trafficking and activity of the protein. | 54.28   | 17.12  | 3.17 | 5.00E-06 | 4.58E-05 |
| 4417 | 7 | F2-3 vs. S2-3 | 251309_at  | AT3G61220 | CytADR/SDR1 is an aldehyde reductase that catalyzes the reduction of the aldehyde carbonyl groups on alpha,beta-unsaturated aldehydes with more than 5 carbons in vitro. It can also act on menthone and neomenthol in vitro, but these do not represent likely endogenous activities of this enzyme in planta. GFP-tagged CytADR appears to localize to the cytosol where it likely plays a role in detoxifying reactive carbonyls. sdr1 mutants have altered responses to pathogens.The mRNA is cell-to-cell mobile.   | 45.88   | 14.46  | 3.17 | 8.59E-05 | 3.48E-04 |
| 4418 | 7 | F2-3 vs. S2-3 | 254050_s_a | AT4G25670 | stress response NST1-like protein;(source:Araport11)                                                                                                                                                                                                                                                                                                                                                                                                                                                                     | 119.63  | 37.78  | 3.17 | 5.33E-05 | 2.49E-04 |
| 4419 | 7 | F2-3 vs. S2-3 | 249875_at  | AT5G23120 | encodes a stability and/or assembly factor of photosystem II The mRNA is cell-to-cell mobile.                                                                                                                                                                                                                                                                                                                                                                                                                            | 695.13  | 218.98 | 3.17 | 1.50E-05 | 9.94E-05 |
| 4420 | 7 | F2-3 vs. S2-3 | 248243_at  | AT5G53590 | SAUR-like auxin-responsive protein family;(source:Araport11)                                                                                                                                                                                                                                                                                                                                                                                                                                                             | 66.55   | 21.09  | 3.15 | 1.16E-04 | 4.36E-04 |
| 4421 | 7 | F2-3 vs. S2-3 | 259517_at  | AT1G20630 | Catalyzes the reduction of hydrogen peroxide using heme group as cofactor. Protects cells from toxicity by H2O2.                                                                                                                                                                                                                                                                                                                                                                                                         | 335.99  | 107.04 | 3.14 | 1.30E-06 | 1.81E-05 |
| 4422 | 7 | F2-3 vs. S2-3 | 258554_at  | AT3G06980 | DEA(D/H)-box RNA helicase family protein;(source:Araport11)                                                                                                                                                                                                                                                                                                                                                                                                                                                              | 73.44   | 23.38  | 3.14 | 7.00E-07 | 1.20E-05 |

|      |   |               |            |           |                                                                                                                                                                                                                                                                                                                                                                                                                                                                                                                                                                     |         |        |      |          |          |
|------|---|---------------|------------|-----------|---------------------------------------------------------------------------------------------------------------------------------------------------------------------------------------------------------------------------------------------------------------------------------------------------------------------------------------------------------------------------------------------------------------------------------------------------------------------------------------------------------------------------------------------------------------------|---------|--------|------|----------|----------|
| 4423 | 7 | F2-3 vs. S2-3 | 266098_at  | AT2G37870 | Bifunctional inhibitor/lipid-transfer protein/seed storage 2S albumin superfamily protein;(source:Araport11)<br>Encodes a cytosolic L-tyrosine aminotransferase. AtTAT2 exhibits much broader amino donor specificity than AtTAT1 and can use not only Tyr but also Phe, Trp, His, Met, Leu, Ala, Ser, Cys, Asp, Asn, Gln, and Arg as amino donors.                                                                                                                                                                                                                 | 409.91  | 130.9  | 3.13 | 9.09E-05 | 3.64E-04 |
| 4424 | 7 | F2-3 vs. S2-3 | 249688_at  | AT5G36160 |                                                                                                                                                                                                                                                                                                                                                                                                                                                                                                                                                                     | 46.3    | 14.86  | 3.12 | 4.80E-06 | 4.48E-05 |
| 4425 | 7 | F2-3 vs. S2-3 | 261564_at  | AT1G01720 | Belongs to a large family of putative transcriptional activators with NAC domain. Transcript level increases in response to wounding and abscisic acid. ATAF1 attenuates ABA signaling and synthesis. Mutants are hyposensitive to ABA. The mRNA is cell-to-cell mobile.                                                                                                                                                                                                                                                                                            | 95.9    | 30.83  | 3.11 | 1.24E-04 | 4.59E-04 |
| 4426 | 7 | F2-3 vs. S2-3 | 260286_at  | AT1G80600 | Encodes HopW1-1-Interacting protein 1 (WIN1). Interacts with the P. syringae effector HopW1-1. WIN1 is a putative acetylornithine transaminase. Modulates plant defenses against bacteria. Three WIN proteins are identified so far (WIN1: AT1G80600; WIN2: AT4G31750; WIN3: AT5G13320). Mediates red-light inhibition of seed germination.                                                                                                                                                                                                                         | 192.36  | 61.75  | 3.11 | 7.02E-05 | 2.99E-04 |
| 4427 | 7 | F2-3 vs. S2-3 | 253954_at  | AT4G26970 | Encodes an aconitase that can catalyze the conversion of citrate to isocitrate through a cis-aconitate intermediate, indicating that it may participate in the TCA cycle and other primary metabolic pathways. The protein is believed to accumulate in the mitochondria and the cytosol. It affects CSD2 (At2g28190 - a superoxide dismutase) transcript levels and may play a role in the response to oxidative stress. One member of the family (ACO1 - At35830) was shown to specifically bind to the 5' UTR of CSD2 in vitro. The mRNA is cell-to-cell mobile. | 1600.17 | 515.29 | 3.11 | 1.34E-04 | 4.85E-04 |
| 4428 | 7 | F2-3 vs. S2-3 | 256156_at  | AT3G08510 | Phosphoinositide-specific phospholipase C (PI-PLC), catalyzes hydrolysis of phosphatidylinositol 4,5-bisphosphate into inositol 1,4,5-trisphosphate and diacylglycerol. It is involved in auxin biosynthesis and signaling, modulating development of both male and female gametophytes. It also regulates MAMP-triggered immunity by modulating ROS production.                                                                                                                                                                                                    | 192.79  | 62.21  | 3.1  | 1.80E-06 | 2.29E-05 |
| 4429 | 7 | F2-3 vs. S2-3 | 254972_at  | AT4G10440 | S-adenosyl-L-methionine-dependent methyltransferases superfamily protein;(source:Araport11)                                                                                                                                                                                                                                                                                                                                                                                                                                                                         | 48.16   | 15.53  | 3.1  | 2.39E-05 | 1.38E-04 |
| 4430 | 7 | F2-3 vs. S2-3 | 264603_at  | AT1G04670 | hypothetical protein;(source:Araport11)                                                                                                                                                                                                                                                                                                                                                                                                                                                                                                                             | 29.13   | 9.42   | 3.09 | 2.70E-06 | 3.02E-05 |
| 4431 | 7 | F2-3 vs. S2-3 | 258167_at  | AT3G21560 | Encodes a protein with sinapic acid:UDP-glucose glucosyltransferase activity. Mutants defective in this gene are hyper-fluorescent (which accumulate in their trichomes a compound that is likely to be 3',5'-dimethoxynaringenin chalcone or sinapoyltriatic acid lactone, potential products of the concerted action of 4-coumarate CoA ligase and chalcone synthase on sinapic acid). Also shown to be required for Arabidopsis nonhost resistance to the Asian soybean rust pathogen Phakopsora pachyrhizi.                                                     | 158.2   | 51.15  | 3.09 | 5.29E-05 | 2.47E-04 |
| 4432 | 7 | F2-3 vs. S2-3 | 252331_s_a | AT3G48780 | Encodes one of the two LCB2 subunits (LCB2a and LCB2b) of serine palmitoyltransferase, an enzyme involved in sphingolipid biosynthesis. LCB2a and LCB2b are functional redundant. Double mutants are gametophytic lethal. The mRNA is cell-to-cell mobile.                                                                                                                                                                                                                                                                                                          | 89.75   | 29.02  | 3.09 | 2.50E-06 | 2.85E-05 |
| 4433 | 7 | F2-3 vs. S2-3 | 247593_at  | AT5G60790 | member of GCN subfamily                                                                                                                                                                                                                                                                                                                                                                                                                                                                                                                                             | 333.28  | 108.11 | 3.08 | 2.20E-06 | 2.63E-05 |
| 4434 | 7 | F2-3 vs. S2-3 | 259420_at  | AT1G13900 | Encodes a dual-localized acid phosphatase (mitochondria and chloroplast) that modulates carbon metabolism.                                                                                                                                                                                                                                                                                                                                                                                                                                                          | 207.16  | 67.46  | 3.07 | 9.80E-06 | 7.45E-05 |
| 4435 | 7 | F2-3 vs. S2-3 | 262281_at  | AT1G68570 | NPF3.1 is a membrane localized GA transporter that is expressed in the root endodermis.                                                                                                                                                                                                                                                                                                                                                                                                                                                                             | 118.74  | 38.69  | 3.07 | 4.60E-06 | 4.33E-05 |
| 4436 | 7 | F2-3 vs. S2-3 | 263950_at  | AT2G36020 | HVA22-like protein J;(source:Araport11)                                                                                                                                                                                                                                                                                                                                                                                                                                                                                                                             | 45.31   | 14.76  | 3.07 | 4.20E-06 | 4.10E-05 |
| 4437 | 7 | F2-3 vs. S2-3 | 263157_at  | AT1G54100 | Aldehyde dehydrogenase                                                                                                                                                                                                                                                                                                                                                                                                                                                                                                                                              | 852.78  | 278.59 | 3.06 | 5.87E-04 | 1.50E-03 |
| 4438 | 7 | F2-3 vs. S2-3 | 255345_at  | AT4G04460 | Saposin-like aspartyl protease family protein;(source:Araport11)                                                                                                                                                                                                                                                                                                                                                                                                                                                                                                    | 38.57   | 12.61  | 3.06 | 1.30E-06 | 1.81E-05 |
| 4439 | 7 | F2-3 vs. S2-3 | 249187_at  | AT5G43060 | Peptidase, activity detected in extracts of root, leaf and cell culture.                                                                                                                                                                                                                                                                                                                                                                                                                                                                                            | 168.45  | 55.04  | 3.06 | 3.80E-06 | 3.79E-05 |
| 4440 | 7 | F2-3 vs. S2-3 | 260325_at  | AT1G63940 | monodehydroascorbate reductase 6;(source:Araport11)                                                                                                                                                                                                                                                                                                                                                                                                                                                                                                                 | 93.83   | 30.8   | 3.05 | 8.00E-06 | 6.40E-05 |
| 4441 | 7 | F2-3 vs. S2-3 | 258445_at  | AT3G22400 | Encodes lipoxygenase5 (LOX5). LOX5 activity in roots facilitates green peach aphid colonization of Arabidopsis foliage by promoting green peach aphid feeding from sieve element and water consumption from xylem.                                                                                                                                                                                                                                                                                                                                                  | 124.43  | 40.77  | 3.05 | 1.05E-05 | 7.79E-05 |
| 4442 | 7 | F2-3 vs. S2-3 | 247470_at  | AT5G62220 | Encodes a Golgi apparatus-localized galactosyltransferase involved in galactosyl-substitution of xyloglucan at position 2.                                                                                                                                                                                                                                                                                                                                                                                                                                          | 106.97  | 35.07  | 3.05 | 1.17E-04 | 4.39E-04 |

|      |   |               |                 |           |                                                                                                                                                                                                                                                                                                                                                                                                                                                                                                                                                                                                                                                                                                               |         |        |      |          |          |
|------|---|---------------|-----------------|-----------|---------------------------------------------------------------------------------------------------------------------------------------------------------------------------------------------------------------------------------------------------------------------------------------------------------------------------------------------------------------------------------------------------------------------------------------------------------------------------------------------------------------------------------------------------------------------------------------------------------------------------------------------------------------------------------------------------------------|---------|--------|------|----------|----------|
| 4443 | 7 | F2-3 vs. S2-3 | 261920_at       | AT1G65930 | Encodes a NADP+-isocitrate dehydrogenase that is believed to function in the cytosol. It appears to contribute to NADPH production under oxidative stress, and thereby to participate in redox signalling linked to defense responses. The mRNA is cell-to-cell mobile.                                                                                                                                                                                                                                                                                                                                                                                                                                       | 981.78  | 322.44 | 3.04 | 3.64E-05 | 1.89E-04 |
| 4444 | 7 | F2-3 vs. S2-3 | 266205_s_a<br>t | AT2G27860 | Encodes UDP-d-apiose/UDP-d-xylose synthase that requires NAD+ for enzymatic activity and is strongly inhibited by UDP-d-galacturonate. Encodes a member of the TBL (TICKET-INDUCED BY ETHYLENE-LIKE) gene family containing a plant-specific DUF231 (domain of unknown function) domain. A putative xyloglucan O-acetyltransferase. TBL gene family has 46 members, two of which (TBR/AT5G06700 and TBL3/AT5G01360) have been shown to be involved in the synthesis and deposition of secondary wall cellulose, presumably by influencing the esterification state of pectic polymers. A nomenclature for this gene family has been proposed (Volker Bischoff & Wolf Scheible, 2010, personal communication). | 1112.08 | 366.78 | 3.03 | 1.94E-05 | 1.18E-04 |
| 4445 | 7 | F2-3 vs. S2-3 | 257309_at       | AT3G28150 | Encodes GRX480, a member of the glutaredoxin family that regulates protein redox state. GRX480 interacts with TGA factors and suppresses JA-responsive PDF1.2 transcription. GRX480 transcription is SA-inducible and requires NPR1. Maybe involved in SA/JA cross-talk. It has also been shown to interact with the transcription factor TGA2 and suppress ORA59 promoter activity.                                                                                                                                                                                                                                                                                                                          | 67.07   | 22.28  | 3.01 | 7.50E-06 | 6.08E-05 |
| 4446 | 7 | F2-3 vs. S2-3 | 261443_at       | AT1G28480 | AFG1-like ATPase family protein;(source:Araport11)                                                                                                                                                                                                                                                                                                                                                                                                                                                                                                                                                                                                                                                            | 119.72  | 39.92  | 3    | 7.50E-06 | 6.08E-05 |
| 4447 | 7 | F2-3 vs. S2-3 | 265634_at       | AT2G25530 | ethylene-insensitive3-like1 (EIL1) The mRNA is cell-to-cell mobile.                                                                                                                                                                                                                                                                                                                                                                                                                                                                                                                                                                                                                                           | 100.55  | 33.47  | 3    | 1.70E-04 | 5.83E-04 |
| 4448 | 7 | F2-3 vs. S2-3 | 266302_at       | AT2G27050 | Encodes a SOS2-like protein kinase that is a member of the CBL-interacting protein kinase family.Loss of function mutants show a decrease in sensitivity to high pH.Phosphorylates AHA2, a plasma membrane H+ ATPase.This phosphorylation appears to regulate the activity of the proton transporter.                                                                                                                                                                                                                                                                                                                                                                                                         | 85.67   | 28.53  | 3    | 7.14E-04 | 1.74E-03 |
| 4449 | 7 | F2-3 vs. S2-3 | 255872_at       | AT2G30360 | A member of EXO70 gene family, putative exocyst subunits, conserved in land plants. Arabidopsis thaliana contains 23 putative EXO70 genes, which can be classified into eight clusters on the phylogenetic tree. Targeted by AvrPtoB to manipulate the defense molecule secretion machinery. Stress responsive asparagine-rich protein. Binds to PevD (Verticillium dahliae ) fungal effector protein. NRP interacts with CRY2, leading to increased cytoplasmic accumulation of CRY2 in a blue light-independent manner (PMID:28633330).NRP also binds FyPP3 and recruits it to endosomes and thus targets it for degradation.                                                                               | 43.86   | 14.62  | 3    | 9.90E-06 | 7.47E-05 |
| 4450 | 7 | F2-3 vs. S2-3 | 247811_at       | AT5G58430 | Phosphatidylinositol binding clathrin assembly protein 5A/B are recent paralogs with overlapping functions in recycling ANXUR proteins to the pollen tube membrane.                                                                                                                                                                                                                                                                                                                                                                                                                                                                                                                                           | 214.93  | 71.83  | 2.99 | 3.42E-05 | 1.79E-04 |
| 4451 | 7 | F2-3 vs. S2-3 | 249237_at       | AT5G42050 | Reticulon family protein;(source:Araport11)                                                                                                                                                                                                                                                                                                                                                                                                                                                                                                                                                                                                                                                                   | 32.12   | 10.77  | 2.98 | 4.50E-06 | 4.27E-05 |
| 4452 | 7 | F2-3 vs. S2-3 | 263166_at       | AT1G03050 | ASA1 encodes the alpha subunit of anthranilate synthase, which catalyzes the rate-limiting step of tryptophan synthesis. ASA1 is induced by ethylene, and forms a link between ethylene signalling and auxin synthesis in roots.                                                                                                                                                                                                                                                                                                                                                                                                                                                                              | 338.37  | 113.65 | 2.98 | 7.70E-06 | 6.20E-05 |
| 4453 | 7 | F2-3 vs. S2-3 | 266553_at       | AT2G46170 | 3-oxo-5-alpha-steroid 4-dehydrogenase family protein;(source:Araport11)                                                                                                                                                                                                                                                                                                                                                                                                                                                                                                                                                                                                                                       | 437.42  | 147.02 | 2.98 | 4.85E-05 | 2.31E-04 |
| 4454 | 7 | F2-3 vs. S2-3 | 250738_at       | AT5G05730 | Peroxidase superfamily protein;(source:Araport11)                                                                                                                                                                                                                                                                                                                                                                                                                                                                                                                                                                                                                                                             | 169.45  | 56.93  | 2.98 | 8.23E-05 | 3.38E-04 |
| 4455 | 7 | F2-3 vs. S2-3 | 246488_at       | AT5G16010 |                                                                                                                                                                                                                                                                                                                                                                                                                                                                                                                                                                                                                                                                                                               | 30.89   | 10.35  | 2.98 | 3.40E-06 | 3.52E-05 |
| 4456 | 7 | F2-3 vs. S2-3 | 248822_at       | AT5G47000 |                                                                                                                                                                                                                                                                                                                                                                                                                                                                                                                                                                                                                                                                                                               |         |        |      |          |          |
| 4457 | 7 | F2-3 vs. S2-3 | 247401_at       | AT5G62790 | 1-Deoxy-d-xylulose 5-phosphate reductoisomerase (DXR) catalyzes the first committed step of the 2-C-methyl-d-erythritol 4-phosphate pathway for isoprenoid biosynthesis. In Arabidopsis, DXR is encoded by a single-copy gene. Arabidopsis DXR is targeted to plastids and localizes into chloroplasts of leaf cells. DXR knockout or strongly silenced lines have a seedling lethal, albino phenotype. Transgenic, partially silenced lines expressing 35S:DXR have a variegated phenotype. Member of the R2R3 factor MYB gene family involved in mediating plant responses to a variety of abiotic stimuli. The mRNA is cell-to-cell mobile.                                                                | 1214.71 | 407.45 | 2.98 | 5.52E-05 | 2.55E-04 |
| 4458 | 7 | F2-3 vs. S2-3 | 246987_at       | AT5G67300 |                                                                                                                                                                                                                                                                                                                                                                                                                                                                                                                                                                                                                                                                                                               | 406.64  | 136.68 | 2.98 | 7.10E-06 | 5.88E-05 |
| 4459 | 7 | F2-3 vs. S2-3 | 249215_at       | AT5G42800 | dihydroflavonol reductase. Catalyzes the conversion of dihydroquercetin to leucocyanidin in the biosynthesis of anthocyanins. Not expressed in roots (qRT-PCR). The mRNA is cell-to-cell mobile. encodes a type I serine/threonine protein phosphatase expressed in expressed in roots, rosettes and flowers.                                                                                                                                                                                                                                                                                                                                                                                                 | 50.26   | 16.94  | 2.97 | 1.19E-04 | 4.46E-04 |
| 4460 | 7 | F2-3 vs. S2-3 | 249126_at       | AT5G43380 |                                                                                                                                                                                                                                                                                                                                                                                                                                                                                                                                                                                                                                                                                                               | 72.33   | 24.34  | 2.97 | 1.00E-06 | 1.54E-05 |
| 4461 | 7 | F2-3 vs. S2-3 | 247981_at       | AT5G56640 | Myo-Inositol Oxygenase gene family                                                                                                                                                                                                                                                                                                                                                                                                                                                                                                                                                                                                                                                                            | 189.82  | 63.84  | 2.97 | 1.30E-06 | 1.81E-05 |
| 4462 | 7 | F2-3 vs. S2-3 | 261767_s_a      | AT1G15500 | TLC ATP/ADP transporter;(source:Araport11)                                                                                                                                                                                                                                                                                                                                                                                                                                                                                                                                                                                                                                                                    | 248.22  | 83.92  | 2.96 | 2.84E-04 | 8.54E-04 |

|      |   |               |            |           |                                                                                                                                                                                                                                                                                                                                                                                                                                                                                                                                                                                                                                                                                                                                                                                                  |         |        |      |          |          |
|------|---|---------------|------------|-----------|--------------------------------------------------------------------------------------------------------------------------------------------------------------------------------------------------------------------------------------------------------------------------------------------------------------------------------------------------------------------------------------------------------------------------------------------------------------------------------------------------------------------------------------------------------------------------------------------------------------------------------------------------------------------------------------------------------------------------------------------------------------------------------------------------|---------|--------|------|----------|----------|
| 4463 | 7 | F2-3 vs. S2-3 | 245868_at  | AT1G58030 | Encodes a member of the cationic amino acid transporter (CAT) subfamily of amino acid polyamine choline transporters. Localized to the tonoplast.                                                                                                                                                                                                                                                                                                                                                                                                                                                                                                                                                                                                                                                | 70.1    | 23.72  | 2.96 | 1.50E-05 | 9.94E-05 |
| 4464 | 7 | F2-3 vs. S2-3 | 262263_at  | AT1G70940 | A regulator of auxin efflux and involved in differential growth. PIN3 is expressed in gravity-sensing tissues, with PIN3 protein accumulating predominantly at the lateral cell surface. PIN3 localizes to the plasma membrane and to vesicles. In roots, PIN3 is expressed without pronounced polarity in tiers two and three of the columella cells, at the basal side of vascular cells, and to the lateral side of pericycle cells of the elongation zone. PIN3 overexpression inhibits root cell growth. Protein phosphorylation plays a role in regulating PIN3 trafficking to the plasma membrane. The mRNA is cell-to-cell mobile.                                                                                                                                                       | 66.39   | 22.4   | 2.96 | 8.70E-06 | 6.82E-05 |
| 4465 | 7 | F2-3 vs. S2-3 | 263881_at  | AT2G21820 | seed maturation protein;(source:Araport11)                                                                                                                                                                                                                                                                                                                                                                                                                                                                                                                                                                                                                                                                                                                                                       | 39.82   | 13.44  | 2.96 | 5.99E-05 | 2.69E-04 |
| 4466 | 7 | F2-3 vs. S2-3 | 267175_s_a | AT2G37620 | Member of the actin gene family. Expressed in mature pollen.                                                                                                                                                                                                                                                                                                                                                                                                                                                                                                                                                                                                                                                                                                                                     | 1173.76 | 396.15 | 2.96 | 3.10E-06 | 3.28E-05 |
| 4467 | 7 | F2-3 vs. S2-3 | 246308_at  | AT3G51820 | Encodes a protein with chlorophyll synthase activity. This enzyme has been shown to perform the esterification of chlorophyllide (a and b), the last step of chlorophyll biosynthesis. Although it can use either geranylgeranyl pyrophosphate (GGPP) or phytol pyrophosphate (PhyPP) as substrates, the esterification reaction was faster with GGPP than with PhyPP.                                                                                                                                                                                                                                                                                                                                                                                                                           | 1047.23 | 354.13 | 2.96 | 1.32E-04 | 4.81E-04 |
| 4468 | 7 | F2-3 vs. S2-3 | 253522_at  | AT4G31290 | ChAc-like family protein;(source:Araport11)                                                                                                                                                                                                                                                                                                                                                                                                                                                                                                                                                                                                                                                                                                                                                      | 322.23  | 108.85 | 2.96 | 3.10E-06 | 3.28E-05 |
| 4469 | 7 | F2-3 vs. S2-3 | 263084_at  | AT2G27180 | hypothetical protein;(source:Araport11)<br>Interacts with AtrbohD gene to fine tune the spatial control of ROI production and hypersensitive response to cell in and around infection site.                                                                                                                                                                                                                                                                                                                                                                                                                                                                                                                                                                                                      | 41.38   | 14.05  | 2.95 | 6.48E-04 | 1.62E-03 |
| 4470 | 7 | F2-3 vs. S2-3 | 262344_at  | AT1G64060 | cruciferin (DUF506);(source:Araport11)                                                                                                                                                                                                                                                                                                                                                                                                                                                                                                                                                                                                                                                                                                                                                           | 165.73  | 56.38  | 2.94 | 2.12E-04 | 6.88E-04 |
| 4471 | 7 | F2-3 vs. S2-3 | 267623_at  | AT2G39650 |                                                                                                                                                                                                                                                                                                                                                                                                                                                                                                                                                                                                                                                                                                                                                                                                  | 109.64  | 37.25  | 2.94 | 8.90E-06 | 6.93E-05 |
| 4472 | 7 | F2-3 vs. S2-3 | 258849_at  | AT3G03250 | Is thought to encode a cytosolic UDP-glucose pyrophosphorylase with strong similarity to potato UTP--glucose-1-phosphate uridylyltransferase. Downregulated by flooding.                                                                                                                                                                                                                                                                                                                                                                                                                                                                                                                                                                                                                         | 685.49  | 233.45 | 2.94 | 1.60E-06 | 2.10E-05 |
| 4473 | 7 | F2-3 vs. S2-3 | 258398_at  | AT3G15360 | encodes a prokaryotic thioredoxin The mRNA is cell-to-cell mobile.                                                                                                                                                                                                                                                                                                                                                                                                                                                                                                                                                                                                                                                                                                                               | 53.58   | 18.25  | 2.94 | 3.25E-04 | 9.50E-04 |
| 4474 | 7 | F2-3 vs. S2-3 | 246947_at  | AT5G25120 | putative cytochrome P450 The mRNA is cell-to-cell mobile.                                                                                                                                                                                                                                                                                                                                                                                                                                                                                                                                                                                                                                                                                                                                        | 54.79   | 18.61  | 2.94 | 1.81E-05 | 1.12E-04 |
| 4475 | 7 | F2-3 vs. S2-3 | 251860_at  | AT3G54660 | Encodes glutathione reductase that is most likely localized in the chloroplast.<br>NADPH/respiratory burst oxidase protein D (RbohD).Interacts with AtrbohF gene to fine tune the spatial control of ROI production and hypersensitive response to cell in and around infection site.                                                                                                                                                                                                                                                                                                                                                                                                                                                                                                            | 625.36  | 213.82 | 2.92 | 2.18E-05 | 1.29E-04 |
| 4476 | 7 | F2-3 vs. S2-3 | 248719_at  | AT5G47910 | The mRNA is cell-to-cell mobile.<br>Encodes HCF173, a protein with weak similarities to the superfamily of the short-chain dehydrogenases/reductases. HCF173 is involved in the initiation of translation of the psbA mRNA and binds a specific site in the 5' UTR of psbA mRNA. Mutants shows a high chlorophyll fluorescence phenotype (hcf) and are severely affected in the accumulation of PSII subunits. The protein HCF173 is localized in the chloroplast, where it is mainly associated with the membrane system and is part of a higher molecular weight complex with psbA mRNA as a component of this complex.                                                                                                                                                                        | 153     | 52.38  | 2.92 | 2.70E-05 | 1.51E-04 |
| 4477 | 7 | F2-3 vs. S2-3 | 255764_at  | AT1G16720 | ribosomal protein L6 family protein;(source:Araport11)                                                                                                                                                                                                                                                                                                                                                                                                                                                                                                                                                                                                                                                                                                                                           | 382.58  | 131.32 | 2.91 | 1.60E-06 | 2.10E-05 |
| 4478 | 7 | F2-3 vs. S2-3 | 265338_at  | AT2G18400 | Encodes a protein that might have inorganic pyrophosphatase activity.                                                                                                                                                                                                                                                                                                                                                                                                                                                                                                                                                                                                                                                                                                                            | 1981.37 | 681.15 | 2.91 | 2.30E-06 | 2.69E-05 |
| 4479 | 7 | F2-3 vs. S2-3 | 266765_at  | AT2G46860 | GroES-like zinc-binding alcohol dehydrogenase family protein;(source:Araport11)                                                                                                                                                                                                                                                                                                                                                                                                                                                                                                                                                                                                                                                                                                                  | 39.99   | 13.76  | 2.91 | 1.51E-04 | 5.33E-04 |
| 4480 | 7 | F2-3 vs. S2-3 | 257212_at  | AT3G15090 |                                                                                                                                                                                                                                                                                                                                                                                                                                                                                                                                                                                                                                                                                                                                                                                                  | 206.92  | 71.19  | 2.91 | 9.60E-06 | 7.35E-05 |
| 4481 | 7 | F2-3 vs. S2-3 | 254492_at  | AT4G20260 | Encodes a Ca2+ and Cu2+ binding protein. N-terminal myristylation on glycine 2 appears to enable it to associate tightly with the plasma membrane. Recombinant PCaP1 interacts strongly with phosphatidylinositol 3,5-bisphosphate (PtdIns(3,5)P2) and PtdIns (3,4,5)P3, and weakly with PtdIns(3,5)P2 and PtdIns(4,5). It also interacts with calmodulin (CaM) in a calcium-dependent manner. CaM does not interfere with PCaP1 membrane localization but does weaken interactions between it and the PtdInsPs. PCaP1 has an apparent Kd of 10 uM for Cu2+ and can bind six ions per protein. Transcript levels for PCaP1 first fall and then rise following exposure to CuCl2. Mannitol, sorbitol, and the flg22 oligopeptide also increase expression levels.The mRNA is cell-to-cell mobile. | 38.56   | 13.25  | 2.91 | 3.35E-04 | 9.71E-04 |
| 4482 | 7 | F2-3 vs. S2-3 | 250347_at  | AT5G11960 | magnesium transporter, putative (DUF803);(source:Araport11)                                                                                                                                                                                                                                                                                                                                                                                                                                                                                                                                                                                                                                                                                                                                      | 135.41  | 46.52  | 2.91 | 6.30E-06 | 5.36E-05 |
| 4483 | 7 | F2-3 vs. S2-3 | 245683_at  | AT5G22030 | ubiquitin-specific protease 8;(source:Araport11)<br>The gene AT1G60440 encodes pantothenate kinase 1. Its molecular function was shown to phosphorylate pantothenate to form 4?-phosphopantothenate.                                                                                                                                                                                                                                                                                                                                                                                                                                                                                                                                                                                             | 77.17   | 26.54  | 2.91 | 3.50E-06 | 3.60E-05 |
| 4484 | 7 | F2-3 vs. S2-3 | 264244_at  | AT1G60440 | OBP32pep, putative (DUF220);(source:Araport11)                                                                                                                                                                                                                                                                                                                                                                                                                                                                                                                                                                                                                                                                                                                                                   | 514.43  | 177.12 | 2.9  | 1.72E-05 | 1.09E-04 |
| 4485 | 7 | F2-3 vs. S2-3 | 260304_at  | AT1G70480 |                                                                                                                                                                                                                                                                                                                                                                                                                                                                                                                                                                                                                                                                                                                                                                                                  | 157.87  | 54.44  | 2.9  | 9.90E-06 | 7.47E-05 |



|      |   |               |            |           |                                                                                                                                                                                                                                                                                                                                                                                                                                                                                                                      |        |        |      |          |          |
|------|---|---------------|------------|-----------|----------------------------------------------------------------------------------------------------------------------------------------------------------------------------------------------------------------------------------------------------------------------------------------------------------------------------------------------------------------------------------------------------------------------------------------------------------------------------------------------------------------------|--------|--------|------|----------|----------|
|      |   |               |            |           | EGR3 functions as a negative regulator of plant growth with prominent effect on plant growth during drought stress, EGR3 regulates microtubule organization and likely affects additional cytoskeleton and trafficking processes along the plasma membrane.                                                                                                                                                                                                                                                          |        |        |      |          |          |
| 4486 | 7 | F2-3 vs. S2-3 | 257650_at  | AT3G16800 |                                                                                                                                                                                                                                                                                                                                                                                                                                                                                                                      | 59.11  | 20.36  | 2.9  | 3.50E-06 | 3.60E-05 |
| 4487 | 7 | F2-3 vs. S2-3 | 251757_at  | AT3G55640 | Mitochondrial substrate carrier family protein;(source:Araport11)                                                                                                                                                                                                                                                                                                                                                                                                                                                    | 160.32 | 55.3   | 2.9  | 4.35E-05 | 2.14E-04 |
| 4488 | 7 | F2-3 vs. S2-3 | 253387_at  | AT4G33010 | glycine decarboxylase P-protein 1;(source:Araport11)                                                                                                                                                                                                                                                                                                                                                                                                                                                                 | 596.03 | 205.47 | 2.9  | 1.24E-05 | 8.66E-05 |
| 4489 | 7 | F2-3 vs. S2-3 | 258207_at  | AT3G14050 | RELA/SPOT homolog 2;(source:Araport11)                                                                                                                                                                                                                                                                                                                                                                                                                                                                               | 184.02 | 63.65  | 2.89 | 1.80E-06 | 2.29E-05 |
| 4490 | 7 | F2-3 vs. S2-3 | 252550_at  | AT3G45870 | nodulin MtN21-like transporter family protein                                                                                                                                                                                                                                                                                                                                                                                                                                                                        | 58.79  | 20.34  | 2.89 | 7.20E-06 | 5.94E-05 |
| 4491 | 7 | F2-3 vs. S2-3 | 266892_at  | AT2G26080 | glycine decarboxylase P-protein 2;(source:Araport11)                                                                                                                                                                                                                                                                                                                                                                                                                                                                 | 240.55 | 83.41  | 2.88 | 1.24E-04 | 4.58E-04 |
| 4492 | 7 | F2-3 vs. S2-3 | 252372_at  | AT3G48000 | Encodes a putative (NAD+) aldehyde dehydrogenase. Encodes a cytosolic phosphoglucomutase (PGM). Two Arabidopsis PGM proteins (AT1G70730/PGM2 and AT1G23190/PGM3) have high sequence similarities and redundant functions. Mature plants possessing a single cPGM allele had a major reduction in cPGM activity. Whereas pgm2 and pgm3 single mutants are undistinguishable from the wild type, loss of both PGM2 and PGM3 severely impairs male and female gametophyte development. The mRNA is cell-to-cell mobile. | 205.02 | 71.23  | 2.88 | 6.70E-06 | 5.61E-05 |
| 4493 | 7 | F2-3 vs. S2-3 | 264903_at  | AT1G23190 | encodes a novel subunit of the chloroplast NAD(P)H dehydrogenase complex, involved in cyclic electron flow around photosystem I to produce ATP.                                                                                                                                                                                                                                                                                                                                                                      | 58.14  | 20.25  | 2.87 | 2.08E-04 | 6.81E-04 |
| 4494 | 7 | F2-3 vs. S2-3 | 262878_at  | AT1G64770 |                                                                                                                                                                                                                                                                                                                                                                                                                                                                                                                      | 135.4  | 47.16  | 2.87 | 1.92E-04 | 6.39E-04 |
| 4495 | 7 | F2-3 vs. S2-3 | 267051_at  | AT2G38500 | 2-oxoglutarate (2OG) and Fe(II)-dependent oxygenase superfamily protein;(source:Araport11)                                                                                                                                                                                                                                                                                                                                                                                                                           | 171.76 | 59.77  | 2.87 | 3.76E-04 | 1.07E-03 |
| 4496 | 7 | F2-3 vs. S2-3 | 252472_at  | AT3G46830 | RAB GTPase homolog A2C;(source:Araport11)                                                                                                                                                                                                                                                                                                                                                                                                                                                                            | 217.81 | 75.93  | 2.87 | 1.10E-06 | 1.64E-05 |
| 4497 | 7 | F2-3 vs. S2-3 | 251839_at  | AT3G54950 | Encodes pPLAIIb, a member of the Group 3 patatin-related phospholipases. pPLAIIb hydrolyzes phospholipids and galactolipids and additionally has acyl-CoA thioesterase activity. Alterations of pPLAIIb result in changes in lipid levels and composition.                                                                                                                                                                                                                                                           | 94.58  | 32.93  | 2.87 | 5.70E-06 | 5.00E-05 |
| 4498 | 7 | F2-3 vs. S2-3 | 251020_at  | AT5G02270 | member of NAP subfamily                                                                                                                                                                                                                                                                                                                                                                                                                                                                                              | 97.74  | 34.04  | 2.87 | 5.70E-06 | 5.00E-05 |
| 4499 | 7 | F2-3 vs. S2-3 | 250858_at  | AT5G04760 | R-R-type MYB protein which plays negative roles in salt stress and is required for ABA signaling in Arabidopsis.                                                                                                                                                                                                                                                                                                                                                                                                     | 56.03  | 19.51  | 2.87 | 2.58E-05 | 1.46E-04 |
| 4500 | 7 | F2-3 vs. S2-3 | 253039_at  | AT4G37760 | squalene epoxidase 3;(source:Araport11)                                                                                                                                                                                                                                                                                                                                                                                                                                                                              | 137.47 | 48.12  | 2.86 | 6.05E-05 | 2.71E-04 |
| 4501 | 7 | F2-3 vs. S2-3 | 254270_at  | AT4G23100 | Encodes the enzyme glutamate-cysteine ligase catalyzing the first, and rate-limiting, step of glutathione biosynthesis. Required for cell proliferation at the root tip. Involved in susceptibility to the bacterial pathogen Pseudomonas syringae. Mutants are phytoalexin defective.                                                                                                                                                                                                                               | 140.36 | 49.31  | 2.85 | 8.07E-05 | 3.34E-04 |
| 4502 | 7 | F2-3 vs. S2-3 | 248128_at  | AT5G54770 | Encodes a thiamine biosynthetic gene that has a dual function in thiamine biosynthesis and mitochondrial DNA damage tolerance. It appears to be involved in producing the thiazole portion of thiamine (vitamin B1). A crystal structure of the protein reveals that it forms a 2-ring homo-octamer. The mRNA is cell-to-cell mobile.                                                                                                                                                                                | 867.58 | 304.07 | 2.85 | 2.00E-06 | 2.46E-05 |
| 4503 | 7 | F2-3 vs. S2-3 | 265935_at  | AT2G19580 | Member of TETRASPANIN family                                                                                                                                                                                                                                                                                                                                                                                                                                                                                         | 83.56  | 29.47  | 2.84 | 1.70E-06 | 2.21E-05 |
| 4504 | 7 | F2-3 vs. S2-3 | 245088_at  | AT2G39850 | Subtilisin-like serine endopeptidase family protein;(source:Araport11)                                                                                                                                                                                                                                                                                                                                                                                                                                               | 28.77  | 10.15  | 2.84 | 4.66E-05 | 2.26E-04 |
| 4505 | 7 | F2-3 vs. S2-3 | 245987_at  | AT5G13180 | Encodes a NAC domain transcription factor that interacts with VND7 and negatively regulates xylem vessel formation.                                                                                                                                                                                                                                                                                                                                                                                                  | 44.38  | 15.65  | 2.84 | 1.20E-05 | 8.55E-05 |
| 4506 | 7 | F2-3 vs. S2-3 | 256161_at  | AT1G30090 | Galactose oxidase/kelch repeat superfamily protein;(source:Araport11)                                                                                                                                                                                                                                                                                                                                                                                                                                                | 118.61 | 41.89  | 2.83 | 2.70E-06 | 3.02E-05 |
| 4507 | 7 | F2-3 vs. S2-3 | 260002_at  | AT1G67940 | member of NAP subfamily The mRNA is cell-to-cell mobile.                                                                                                                                                                                                                                                                                                                                                                                                                                                             | 61.72  | 21.82  | 2.83 | 1.20E-04 | 4.48E-04 |
| 4508 | 7 | F2-3 vs. S2-3 | 262262_at  | AT1G70780 | hypothetical protein;(source:Araport11)                                                                                                                                                                                                                                                                                                                                                                                                                                                                              | 655.37 | 231.45 | 2.83 | 2.83E-04 | 8.51E-04 |
| 4509 | 7 | F2-3 vs. S2-3 | 252971_at  | AT4G38770 | Encodes one of four proline-rich proteins in Arabidopsis which are predicted to localize to the cell wall. Transcripts are most abundant in aerial organs of the plant.                                                                                                                                                                                                                                                                                                                                              | 403.06 | 142.62 | 2.83 | 1.43E-04 | 5.11E-04 |
| 4510 | 7 | F2-3 vs. S2-3 | 265184_at  | AT1G23710 | hypothetical protein (DUF1645);(source:Araport11)                                                                                                                                                                                                                                                                                                                                                                                                                                                                    | 75.2   | 26.64  | 2.82 | 2.60E-04 | 7.98E-04 |
| 4511 | 7 | F2-3 vs. S2-3 | 251704_at  | AT3G56360 | hypothetical protein;(source:Araport11)                                                                                                                                                                                                                                                                                                                                                                                                                                                                              | 55.24  | 19.61  | 2.82 | 1.92E-04 | 6.38E-04 |
| 4512 | 7 | F2-3 vs. S2-3 | 265174_s_a | AT1G23460 | Pectin lyase-like superfamily protein;(source:Araport11)                                                                                                                                                                                                                                                                                                                                                                                                                                                             | 28.77  | 10.25  | 2.81 | 3.87E-05 | 1.96E-04 |
| 4513 | 7 | F2-3 vs. S2-3 | 266181_at  | AT2G02390 | Encodes glutathione transferase belonging to the zeta class of GSTs. Naming convention according to Wagner et al. (2002). The protein undergoes spontaneous thiolation following treatment with the oxidant tert-butylhydroperoxide. It functions in vitro as a maleylacetoacetate isomerase and is likely to be involved in tyrosine catabolism.                                                                                                                                                                    | 216.25 | 76.85  | 2.81 | 2.46E-05 | 1.41E-04 |
| 4514 | 7 | F2-3 vs. S2-3 | 263047_at  | AT2G17630 | Pyridoxal phosphate (PLP)-dependent transferases superfamily protein;(source:Araport11)                                                                                                                                                                                                                                                                                                                                                                                                                              | 207.86 | 73.9   | 2.81 | 9.90E-06 | 7.47E-05 |

|      |   |               |                 |           |                                                                                                                                                                                                                                                                                                                                                                                                                                                                                                                                                                                                                                                                                       |         |        |      |          |          |
|------|---|---------------|-----------------|-----------|---------------------------------------------------------------------------------------------------------------------------------------------------------------------------------------------------------------------------------------------------------------------------------------------------------------------------------------------------------------------------------------------------------------------------------------------------------------------------------------------------------------------------------------------------------------------------------------------------------------------------------------------------------------------------------------|---------|--------|------|----------|----------|
| 4515 | 7 | F2-3 vs. S2-3 | 264590_at       | AT2G17710 | Big1;(source:Araport11)                                                                                                                                                                                                                                                                                                                                                                                                                                                                                                                                                                                                                                                               | 72.19   | 25.65  | 2.81 | 1.04E-05 | 7.72E-05 |
|      |   |               |                 |           | Encodes a myb family transcription factor with a single Myb DNA-binding domain (type SHAQKYF) that is unique to plants and is essential for circadian rhythms, specifically for transcriptional regulation within the circadian clock. LUX is required for normal rhythmic expression of multiple clock outputs in both constant light and darkness. It is coregulated with TOC1 and seems to be repressed by CCA1 and LHY by direct binding of these proteins to the evening element in the LUX promoter. The mRNA is cell-to-cell mobile.                                                                                                                                           |         |        |      |          |          |
| 4516 | 7 | F2-3 vs. S2-3 | 252475_s_a<br>t | AT3G46640 | ALDH10A9                                                                                                                                                                                                                                                                                                                                                                                                                                                                                                                                                                                                                                                                              | 38.95   | 13.86  | 2.81 | 1.00E-04 | 3.94E-04 |
|      |   |               |                 |           | ALDH10A9 encodes a protein that can function as a betaine aldehyde dehydrogenase in vitro. The C-terminal amino acids of this protein direct GFP to the peroxisome suggesting that ALDH10A9 accumulates in this organelle. ALDH10A9 transcript levels rise in response to ABA, NaCl, chilling, methyl viologen, and dehydration stress. The enzyme can catalyze the formation of glycine betaine in vitro, but there are still questions about whether Arabidopsis makes this protective compound under natural conditions. This enzyme may be involved in oxidizing aminoaldehydes formed through polyamine metabolism.                                                              |         |        |      |          |          |
| 4517 | 7 | F2-3 vs. S2-3 | 252354_at       | AT3G48170 | Exostosin family protein;(source:Araport11)                                                                                                                                                                                                                                                                                                                                                                                                                                                                                                                                                                                                                                           | 1859.43 | 661.64 | 2.81 | 3.66E-05 | 1.89E-04 |
| 4518 | 7 | F2-3 vs. S2-3 | 245619_at       | AT4G13990 |                                                                                                                                                                                                                                                                                                                                                                                                                                                                                                                                                                                                                                                                                       | 55.3    | 19.65  | 2.81 | 5.00E-06 | 4.58E-05 |
| 4519 | 7 | F2-3 vs. S2-3 | 253268_s_a<br>t | AT4G34135 | The At4g34135 gene encodes a flavonol 7-O-glucosyltransferase (EC 2.4.1.237) that glucosylates also with a 20 fold lower activity flavonols (kaempferol and quercetin) at the 3-O-position. Encodes a gibberellin 2-oxidase that acts on C-19 gibberellins. AtGA2OX2 expression is responsive to cytokinin and KNOX activities.                                                                                                                                                                                                                                                                                                                                                       | 81.03   | 28.82  | 2.81 | 1.02E-04 | 3.97E-04 |
| 4520 | 7 | F2-3 vs. S2-3 | 260023_at       | AT1G30040 | ATP-dependent protease La (LON) domain protein;(source:Araport11)                                                                                                                                                                                                                                                                                                                                                                                                                                                                                                                                                                                                                     | 114.01  | 40.78  | 2.8  | 6.30E-06 | 5.36E-05 |
| 4521 | 7 | F2-3 vs. S2-3 | 266653_at       | AT2G25740 |                                                                                                                                                                                                                                                                                                                                                                                                                                                                                                                                                                                                                                                                                       | 80.36   | 28.73  | 2.8  | 1.03E-04 | 4.01E-04 |
| 4522 | 7 | F2-3 vs. S2-3 | 251218_at       | AT3G62410 | CP12-2 encodes a small peptide found in the chloroplast stroma. It belongs to the CP12 gene family thought to be involved in the formation of a supramolecular complex with glyceraldehyde-3-phosphate dehydrogenase (GAPDH) and phosphoribulokinase (PRK) embedded in the Calvin cycle. CP12-2 is coordinately regulated by light with the photosynthetic GAPDH and PRK. The annotation of this gene is based on article 32494. The mRNA is cell-to-cell mobile. Encodes AtLEA5 (late embryogenesis abundant like protein). Also known as SENESCENCE-ASSOCIATED GENE 21 (SAG21). Has a role on oxidative stress tolerance. mRNA levels are elevated in response to various stresses. | 75.77   | 27.08  | 2.8  | 4.28E-05 | 2.12E-04 |
| 4523 | 7 | F2-3 vs. S2-3 | 255479_at       | AT4G02380 |                                                                                                                                                                                                                                                                                                                                                                                                                                                                                                                                                                                                                                                                                       | 61.46   | 21.96  | 2.8  | 2.80E-06 | 3.09E-05 |
| 4524 | 7 | F2-3 vs. S2-3 | 263012_at       | AT1G23380 | homeodomain transcription factor KNAT6, belonging to class I of KN transcription factor family (which also includes KNAT1 and KNAT2). Expression is increased in as and bop1 leaf mutants. Encodes KCS6, a member of the 3-ketoacyl-CoA synthase family involved in the biosynthesis of VLCFA (very long chain fatty acids).                                                                                                                                                                                                                                                                                                                                                          | 43.68   | 15.64  | 2.79 | 2.73E-05 | 1.52E-04 |
| 4525 | 7 | F2-3 vs. S2-3 | 260267_at       | AT1G68530 | ferritin 2;(source:Araport11)                                                                                                                                                                                                                                                                                                                                                                                                                                                                                                                                                                                                                                                         | 73.56   | 26.36  | 2.79 | 3.74E-05 | 1.92E-04 |
| 4526 | 7 | F2-3 vs. S2-3 | 256416_at       | AT3G11050 |                                                                                                                                                                                                                                                                                                                                                                                                                                                                                                                                                                                                                                                                                       | 137.98  | 49.49  | 2.79 | 9.34E-05 | 3.72E-04 |
| 4527 | 7 | F2-3 vs. S2-3 | 258359_s_a<br>t | AT3G14420 | Encodes a glycolate oxidase that modulates reactive oxygen species-mediated signal transduction during nonhost resistance. The mRNA is cell-to-cell mobile.                                                                                                                                                                                                                                                                                                                                                                                                                                                                                                                           | 72.16   | 25.89  | 2.79 | 5.80E-06 | 5.07E-05 |
| 4528 | 7 | F2-3 vs. S2-3 | 246075_at       | AT5G20410 | Encodes a type B monogalactosyldiacylglycerol (MGDG) synthase. Strongly induced by phosphate deprivation, and in non-photosynthetic tissues. Does not contribute to galactolipid synthesis under Pi-sufficient conditions but does under Pi starvation. Encodes a putative nucleotide-diphospho-sugar transferase required for pollen germination and tube growth.                                                                                                                                                                                                                                                                                                                    | 153.54  | 55.06  | 2.79 | 2.85E-04 | 8.56E-04 |
| 4529 | 7 | F2-3 vs. S2-3 | 262868_at       | AT1G64980 | alpha/beta-Hydrolases superfamily protein;(source:Araport11)                                                                                                                                                                                                                                                                                                                                                                                                                                                                                                                                                                                                                          | 249.98  | 89.94  | 2.78 | 5.14E-05 | 2.42E-04 |
| 4530 | 7 | F2-3 vs. S2-3 | 267503_at       | AT2G45600 |                                                                                                                                                                                                                                                                                                                                                                                                                                                                                                                                                                                                                                                                                       | 48.97   | 17.61  | 2.78 | 8.83E-04 | 2.06E-03 |
| 4531 | 7 | F2-3 vs. S2-3 | 252531_at       | AT3G46520 | Member of actin subclass composed of ACT12 and ACT4. RNA is expressed at very low levels in vegetative organs, low levels in flowers and very high levels in pollen. Expression of an ACT12/GUS fusion was found in vascular tissues, tapetum, developing and mature pollen, the root cap and in a ring of pericycle tissues during lateral root initiation and early development.                                                                                                                                                                                                                                                                                                    | 34.53   | 12.44  | 2.78 | 3.51E-05 | 1.83E-04 |
| 4532 | 7 | F2-3 vs. S2-3 | 251962_at       | AT3G53420 | a member of the plasma membrane intrinsic protein subfamily PIP2. localizes to the plasma membrane and exhibits water transport activity in Xenopus oocyte. expressed specifically in the vascular bundles and protein level increases slightly during leaf dev. When expressed in yeast cells can conduct hydrogen peroxide into those cells.                                                                                                                                                                                                                                                                                                                                        | 2458.28 | 884.35 | 2.78 | 5.00E-06 | 4.58E-05 |

|      |   |               |            |           |                                                                                                                                                                                                                                                                                                                                                                                                                                                                                                                                                                                                            |         |        |      |          |          |
|------|---|---------------|------------|-----------|------------------------------------------------------------------------------------------------------------------------------------------------------------------------------------------------------------------------------------------------------------------------------------------------------------------------------------------------------------------------------------------------------------------------------------------------------------------------------------------------------------------------------------------------------------------------------------------------------------|---------|--------|------|----------|----------|
| 4533 | 7 | F2-3 vs. S2-3 | 245906_at  | AT5G11070 | hypothetical protein;(source:Araport11)                                                                                                                                                                                                                                                                                                                                                                                                                                                                                                                                                                    | 103.63  | 37.24  | 2.78 | 2.16E-05 | 1.28E-04 |
|      |   |               |            |           | Encodes a fumarase enzyme initially shown to be in the mitochondria through proteomic studies but later shown to be present in the cytosol using an RFP fluorescent protein tag. It appears to be important for the accumulation of fumarate from malate in leaves in the light, and helps to promote nitrogen assimilation under high nitrogen conditions. It does not appear to be necessary for lipid metabolism and seedling growth. Inhibition of fumarate accumulation results in an overall shift in the cold response of leaves, with a complete inhibition of cold acclimation of photosynthesis. |         |        |      |          |          |
| 4534 | 7 | F2-3 vs. S2-3 | 248461_s_a | AT5G50950 |                                                                                                                                                                                                                                                                                                                                                                                                                                                                                                                                                                                                            | 839.33  | 301.76 | 2.78 | 4.10E-06 | 4.02E-05 |
| 4535 | 7 | F2-3 vs. S2-3 | 252441_at  | AT3G46780 | plastid transcriptionally active 16;(source:Araport11)                                                                                                                                                                                                                                                                                                                                                                                                                                                                                                                                                     | 38.51   | 13.89  | 2.77 | 1.44E-04 | 5.12E-04 |
| 4536 | 7 | F2-3 vs. S2-3 | 264317_at  | AT1G70310 | Spermidine synthase.                                                                                                                                                                                                                                                                                                                                                                                                                                                                                                                                                                                       | 77.51   | 28.09  | 2.76 | 2.65E-05 | 1.49E-04 |
| 4537 | 7 | F2-3 vs. S2-3 | 245724_at  | AT1G73390 | Endosomal targeting BRO1-like domain-containing protein;(source:Araport11)                                                                                                                                                                                                                                                                                                                                                                                                                                                                                                                                 | 60.21   | 21.8   | 2.76 | 1.75E-04 | 5.95E-04 |
| 4538 | 7 | F2-3 vs. S2-3 | 257271_at  | AT3G28007 | Nodulin MtN3 family protein;(source:Araport11)                                                                                                                                                                                                                                                                                                                                                                                                                                                                                                                                                             | 314.43  | 113.92 | 2.76 | 4.80E-06 | 4.48E-05 |
|      |   |               |            |           | Encodes the Rieske FeS center of cytochrome b6f complex. Gene is expressed in shoot but not in root. Mutant has reduced electron transport at saturating light intensities and Q-cycle activity is hypersensitive to acidification of the thylakoid lumen. The mRNA is cell-to-cell mobile.                                                                                                                                                                                                                                                                                                                |         |        |      |          |          |
| 4539 | 7 | F2-3 vs. S2-3 | 255435_at  | AT4G03280 |                                                                                                                                                                                                                                                                                                                                                                                                                                                                                                                                                                                                            | 2655.11 | 960.35 | 2.76 | 3.90E-06 | 3.86E-05 |
| 4540 | 7 | F2-3 vs. S2-3 | 253963_at  | AT4G26470 | Calcium-binding EF-hand family protein;(source:Araport11)                                                                                                                                                                                                                                                                                                                                                                                                                                                                                                                                                  | 29.15   | 10.55  | 2.76 | 5.17E-05 | 2.43E-04 |
|      |   |               |            |           | AtCPT7 synthesizes medium-chain polyprenols of approximately 55 carbons in length. The enzyme utilizes geranylgeranyl pyrophosphate (GGPP) and isopentenyl pyrophosphate (IPP) as substrates. The enzymatic product accumulates into plastidial membranes (DOI:10.1105/tpc.16.00796).                                                                                                                                                                                                                                                                                                                      |         |        |      |          |          |
| 4541 | 7 | F2-3 vs. S2-3 | 247780_at  | AT5G58770 | Encodes N-carbamoylputrescine amidohydrolase that is involved in putrescine and polyamine biosynthesis.                                                                                                                                                                                                                                                                                                                                                                                                                                                                                                    | 36.42   | 13.18  | 2.76 | 7.20E-06 | 5.94E-05 |
| 4542 | 7 | F2-3 vs. S2-3 | 265642_at  | AT2G27450 |                                                                                                                                                                                                                                                                                                                                                                                                                                                                                                                                                                                                            | 111.35  | 40.42  | 2.75 | 7.50E-06 | 6.08E-05 |
| 4543 | 7 | F2-3 vs. S2-3 | 258809_at  | AT3G04070 | NAC domain containing protein 47;(source:Araport11)                                                                                                                                                                                                                                                                                                                                                                                                                                                                                                                                                        | 45.75   | 16.64  | 2.75 | 1.52E-05 | 1.00E-04 |
| 4544 | 7 | F2-3 vs. S2-3 | 249469_at  | AT5G39320 | UDP-glucose 6-dehydrogenase family protein;(source:Araport11)                                                                                                                                                                                                                                                                                                                                                                                                                                                                                                                                              | 210.26  | 76.34  | 2.75 | 3.70E-06 | 3.73E-05 |
| 4545 | 7 | F2-3 vs. S2-3 | 247047_at  | AT5G66650 | Chloroplast localized mitochondrial calcium uniporter.                                                                                                                                                                                                                                                                                                                                                                                                                                                                                                                                                     | 91.28   | 33.19  | 2.75 | 4.11E-04 | 1.14E-03 |
|      |   |               |            |           | Encodes a protein with glutamyl-tRNA reductase (GluTR) activity, catalyzing the NADPH-dependent reduction of Glu-tRNA(Glu) to glutamate 1-semialdehyde (GSA) with the release of free tRNA(Glu). It is involved in the early steps of chlorophyll biosynthesis.                                                                                                                                                                                                                                                                                                                                            |         |        |      |          |          |
| 4546 | 7 | F2-3 vs. S2-3 | 256020_at  | AT1G58290 |                                                                                                                                                                                                                                                                                                                                                                                                                                                                                                                                                                                                            | 138.46  | 50.61  | 2.74 | 5.40E-06 | 4.85E-05 |
| 4547 | 7 | F2-3 vs. S2-3 | 259054_at  | AT3G03480 | acetyl CoA:(Z)-3-hexen-1-ol acetyltransferase;(source:Araport11)                                                                                                                                                                                                                                                                                                                                                                                                                                                                                                                                           | 36.64   | 13.37  | 2.74 | 5.80E-06 | 5.07E-05 |
| 4548 | 7 | F2-3 vs. S2-3 | 258408_at  | AT3G17630 | member of Putative Na <sup>+</sup> /H <sup>+</sup> antiporter family                                                                                                                                                                                                                                                                                                                                                                                                                                                                                                                                       | 33.47   | 12.21  | 2.74 | 8.30E-05 | 3.40E-04 |
| 4549 | 7 | F2-3 vs. S2-3 | 253625_at  | AT4G30600 | signal recognition particle receptor alpha subunit family protein;(source:Araport11)                                                                                                                                                                                                                                                                                                                                                                                                                                                                                                                       | 991.77  | 362.1  | 2.74 | 5.50E-06 | 4.90E-05 |
| 4550 | 7 | F2-3 vs. S2-3 | 246841_at  | AT5G26700 | RmlC-like cupins superfamily protein;(source:Araport11)                                                                                                                                                                                                                                                                                                                                                                                                                                                                                                                                                    | 31.19   | 11.38  | 2.74 | 1.73E-04 | 5.90E-04 |
|      |   |               |            |           | Encodes a eukaryotic release factor 1 homolog. Cosuppression of the gene's expression results affects cell elongation of the inflorescence stem, specifically the internodes, and radial cell division. Expression of the protein is primarily observed in the vascular system and in actively growing and elongating zones.                                                                                                                                                                                                                                                                               |         |        |      |          |          |
| 4551 | 7 | F2-3 vs. S2-3 | 248749_at  | AT5G47880 |                                                                                                                                                                                                                                                                                                                                                                                                                                                                                                                                                                                                            | 95.29   | 34.82  | 2.74 | 5.32E-05 | 2.48E-04 |
|      |   |               |            |           | Encodes a member of the BAHD acyltransferase superfamily. Mutants have enhanced susceptibility to virulent and avirulent pathogens and are defective in pathogen induced SA biosynthesis. EPS1 may act upstream of SA biosynthesis as application of SA can rescue the mutant phenotype.                                                                                                                                                                                                                                                                                                                   |         |        |      |          |          |
| 4552 | 7 | F2-3 vs. S2-3 | 247038_at  | AT5G67160 |                                                                                                                                                                                                                                                                                                                                                                                                                                                                                                                                                                                                            | 309.27  | 112.82 | 2.74 | 2.10E-06 | 2.53E-05 |
| 4553 | 7 | F2-3 vs. S2-3 | 266983_at  | AT2G39400 | alpha/beta-Hydrolases superfamily protein;(source:Araport11)                                                                                                                                                                                                                                                                                                                                                                                                                                                                                                                                               | 32.78   | 12     | 2.73 | 1.64E-05 | 1.05E-04 |
| 4554 | 7 | F2-3 vs. S2-3 | 267393_at  | AT2G44500 | O-fucosyltransferase family protein;(source:Araport11)                                                                                                                                                                                                                                                                                                                                                                                                                                                                                                                                                     | 40.93   | 15.02  | 2.73 | 1.68E-05 | 1.07E-04 |
|      |   |               |            |           | Encodes a Pi starvation-responsive protein AtPS3. A member of the phosphate starvation-induced glycerol-3-phosphate permease gene family: AT3G47420(G3Pp1), AT4G25220(G3Pp2), AT1G30560(G3Pp3), AT4G17550(G3Pp4) and AT2G13100(G3Pp5). Its expression is responsive to phosphate (Pi) and not phosphite (Phi) in roots and shoots.                                                                                                                                                                                                                                                                         |         |        |      |          |          |
| 4555 | 7 | F2-3 vs. S2-3 | 252414_at  | AT3G47420 |                                                                                                                                                                                                                                                                                                                                                                                                                                                                                                                                                                                                            | 119.24  | 43.65  | 2.73 | 8.51E-04 | 2.00E-03 |
| 4556 | 7 | F2-3 vs. S2-3 | 255552_at  | AT4G01850 | S-adenosylmethionine synthetase 2;(source:Araport11)                                                                                                                                                                                                                                                                                                                                                                                                                                                                                                                                                       | 891.95  | 326.45 | 2.73 | 4.54E-05 | 2.21E-04 |
|      |   |               |            |           | Encodes PGRL1B, a transmembrane protein present in thylakoids. PGRL1B has a highly homologous isoform PGRL1A encoded by At4g22890. Plants lacking PGRL1 show perturbation of cyclic electron flow, similar to PGR5-deficient plants. PGRL1 and PGR5 interact physically and associate with PSI (photosystem I).                                                                                                                                                                                                                                                                                            |         |        |      |          |          |
| 4557 | 7 | F2-3 vs. S2-3 | 254848_at  | AT4G11960 |                                                                                                                                                                                                                                                                                                                                                                                                                                                                                                                                                                                                            | 64.95   | 23.77  | 2.73 | 6.29E-05 | 2.77E-04 |
| 4558 | 7 | F2-3 vs. S2-3 | 254187_at  | AT4G23890 | NAD(P)H-quinone oxidoreductase subunit S;(source:Araport11)                                                                                                                                                                                                                                                                                                                                                                                                                                                                                                                                                | 342.07  | 125.33 | 2.73 | 2.92E-05 | 1.59E-04 |
| 4559 | 7 | F2-3 vs. S2-3 | 247222_at  | AT5G64840 | member of GCN subfamily                                                                                                                                                                                                                                                                                                                                                                                                                                                                                                                                                                                    | 835.61  | 305.88 | 2.73 | 6.31E-04 | 1.58E-03 |

|      |   |               |            |           |                                                                                                                                                                                                                                                                                                                                                                                                                                                                                                                                                                                                                                                                                                                                                                                                  |        |        |      |          |          |
|------|---|---------------|------------|-----------|--------------------------------------------------------------------------------------------------------------------------------------------------------------------------------------------------------------------------------------------------------------------------------------------------------------------------------------------------------------------------------------------------------------------------------------------------------------------------------------------------------------------------------------------------------------------------------------------------------------------------------------------------------------------------------------------------------------------------------------------------------------------------------------------------|--------|--------|------|----------|----------|
| 4560 | 7 | F2-3 vs. S2-3 | 264394_at  | AT1G11860 | Glycine cleavage T-protein family;(source:Araport11)                                                                                                                                                                                                                                                                                                                                                                                                                                                                                                                                                                                                                                                                                                                                             | 899.59 | 331.17 | 2.72 | 1.16E-05 | 8.35E-05 |
| 4561 | 7 | F2-3 vs. S2-3 | 263678_at  | AT1G04420 | NAD(P)-linked oxidoreductase superfamily protein;(source:Araport11)<br>Member of Alpha-Expansin Gene Family. Naming convention from the Expansin Working Group (Kende et al, Plant Mol Bio). Involved in the formation of nematode-induced syncytia in roots of Arabidopsis thaliana.                                                                                                                                                                                                                                                                                                                                                                                                                                                                                                            | 107.85 | 39.86  | 2.71 | 2.15E-04 | 6.94E-04 |
| 4562 | 7 | F2-3 vs. S2-3 | 256299_at  | AT1G69530 | Encodes a GDP-mannose pyrophosphorylase/ mannose-1-pyrophosphatase. This enzyme provides GDP-mannose, which is used for cell wall carbohydrate biosynthesis and protein glycosylation as well as for ascorbate (vitamin C) biosynthesis. Mutations in this gene confer hypersensitivity to NH4+.                                                                                                                                                                                                                                                                                                                                                                                                                                                                                                 | 60.66  | 22.35  | 2.71 | 1.85E-05 | 1.14E-04 |
| 4563 | 7 | F2-3 vs. S2-3 | 245060_at  | AT2G39770 | Encodes an arabinogalactan protein that is expressed in pollen, pollen sac and pollen tube. Loss of AGP11 function results in decreased fertility due to defects in pollen tube growth.                                                                                                                                                                                                                                                                                                                                                                                                                                                                                                                                                                                                          | 178.48 | 65.8   | 2.71 | 1.72E-05 | 1.09E-04 |
| 4564 | 7 | F2-3 vs. S2-3 | 259189_at  | AT3G01700 | encodes a member of the DREB subfamily A-2 of ERF/AP2 transcription factor family. The protein contains one AP2 domain. There are eight members in this subfamily including DREB2A AND DREB2B that are involved in response to drought.                                                                                                                                                                                                                                                                                                                                                                                                                                                                                                                                                          | 31.57  | 11.64  | 2.71 | 4.96E-05 | 2.35E-04 |
| 4565 | 7 | F2-3 vs. S2-3 | 251598_at  | AT3G57600 | Acetamidase/Formamidase family protein;(source:Araport11)                                                                                                                                                                                                                                                                                                                                                                                                                                                                                                                                                                                                                                                                                                                                        | 36.04  | 13.28  | 2.71 | 6.00E-06 | 5.18E-05 |
| 4566 | 7 | F2-3 vs. S2-3 | 253048_at  | AT4G37560 | Fatty acid desaturase family protein;(source:Araport11)                                                                                                                                                                                                                                                                                                                                                                                                                                                                                                                                                                                                                                                                                                                                          | 49.1   | 18.11  | 2.71 | 3.46E-04 | 9.97E-04 |
| 4567 | 7 | F2-3 vs. S2-3 | 260950_s_a | AT1G06090 |                                                                                                                                                                                                                                                                                                                                                                                                                                                                                                                                                                                                                                                                                                                                                                                                  | 71.31  | 26.37  | 2.7  | 7.50E-06 | 6.08E-05 |
| 4568 | 7 | F2-3 vs. S2-3 | 256017_at  | AT1G19180 | JAZ1 is a nuclear-localized protein involved in jasmonate signaling. JAZ1 transcript levels rise in response to a jasmonate stimulus. JAZ1 can interact with the COI1 F-box subunit of an SCF E3 ubiquitin ligase in a yeast-two-hybrid assay only in the presence of jasmonate-isoleucine (JA-Ile) or coronatine. Application of jasmonate methyl ester to Arabidopsis roots reduces the levels of a JAZ1:GUS fusion protein, presumably by stimulating ubiquitin-proteasome-mediated degradation. The Jas domain appears to be important for JAZ1-COI1 interactions in the presence of coronatine. Two positive residues (R205 and R206) in the Jas domain shown to be important for coronatine - dependent COI1 binding are not required for binding AtMYC2. The mRNA is cell-to-cell mobile. | 355.15 | 131.4  | 2.7  | 9.59E-04 | 2.21E-03 |
| 4569 | 7 | F2-3 vs. S2-3 | 264280_at  | AT1G61820 | beta glucosidase 46;(source:Araport11)                                                                                                                                                                                                                                                                                                                                                                                                                                                                                                                                                                                                                                                                                                                                                           | 24.18  | 8.95   | 2.7  | 4.11E-04 | 1.14E-03 |
| 4570 | 7 | F2-3 vs. S2-3 | 250356_at  | AT5G11710 | EPSIN1 plays an important role in the vacuolar trafficking of soluble proteins at the trans-Golgi network via its interaction with gamma-ADR, VT111, VSR1, and clathrin. Associated with actin filaments and with the Golgi complex. Expressed in most tissues.The mRNA is cell-to-cell mobile.                                                                                                                                                                                                                                                                                                                                                                                                                                                                                                  | 165.1  | 61.29  | 2.69 | 5.57E-04 | 1.44E-03 |
| 4571 | 7 | F2-3 vs. S2-3 | 262645_at  | AT1G62750 | Nuclear encoded protein consists of the five domains conserved in EF-G proteins, with two GTP-binding sites in the first domain, and an additional transit peptide at the N-terminus. Localized in chloroplasts. Point mutation results in a delay in the onset of germination. At early developmental stage embryos still contain undifferentiated proplastids. The greening of cotyledons is severely impaired in light-grown mutant sco1 seedlings, whereas the following true leaves develop normally as in wild-type plants.                                                                                                                                                                                                                                                                | 506.23 | 188.58 | 2.68 | 1.22E-05 | 8.58E-05 |
| 4572 | 7 | F2-3 vs. S2-3 | 263956_at  | AT2G35940 | Encodes a member of the BEL-like homeodomain protein family. Ecotopic expression in the embryo sac leads to defects in nuclear migration and cellularization and embryo sacs with multiple egg cells. Loss of function alleles have no female gametophyte defects. The ecotopic expression phenotype requires KNAT3 because it can be suppressed by loss of KNAT3 function alleles. Localized to the nucleus but interaction with OFP1 relocates it to the cytoplasm.                                                                                                                                                                                                                                                                                                                            | 99.5   | 37.11  | 2.68 | 1.35E-05 | 9.22E-05 |
| 4573 | 7 | F2-3 vs. S2-3 | 249208_at  | AT5G42650 | Encodes a member of the cytochrome p450 CYP74 gene family that functions as an allene oxide synthase. This enzyme catalyzes dehydration of the hydroperoxide to an unstable allene oxide in the JA biosynthetic pathway. It shows a dual catalytic activity, the major one being a 13-AOS but also expressing a 9-AOS activity. CFA-Leu, CFA-Val, CFA-Met and CFA-Ala can induce the expression of AOS.                                                                                                                                                                                                                                                                                                                                                                                          | 66.92  | 25     | 2.68 | 1.14E-05 | 8.32E-05 |
| 4574 | 7 | F2-3 vs. S2-3 | 248576_at  | AT5G49810 | Arabidopsis thaliana methionine S-methyltransferase, an enzyme that catalyzes S - methylmethionine formation. The mRNA is cell-to-cell mobile.                                                                                                                                                                                                                                                                                                                                                                                                                                                                                                                                                                                                                                                   | 108.99 | 40.68  | 2.68 | 4.40E-06 | 4.21E-05 |
| 4575 | 7 | F2-3 vs. S2-3 | 248404_at  | AT5G51460 | homologous to the C-terminal part of microbial trehalose-6-phosphate phosphatases                                                                                                                                                                                                                                                                                                                                                                                                                                                                                                                                                                                                                                                                                                                | 49.92  | 18.63  | 2.68 | 3.58E-04 | 1.03E-03 |

|      |   |               |            |           |                                                                                                                                                                                                                                                                                                                                                                       |         |        |      |          |          |
|------|---|---------------|------------|-----------|-----------------------------------------------------------------------------------------------------------------------------------------------------------------------------------------------------------------------------------------------------------------------------------------------------------------------------------------------------------------------|---------|--------|------|----------|----------|
| 4576 | 7 | F2-3 vs. S2-3 | 252984_at  | AT4G37990 | Encodes an aromatic alcohol:NADP+ oxidoreductase whose mRNA levels are increased in response to treatment with a variety of phytopathogenic bacteria. Though similar to mannitol dehydrogenases, this enzyme does not have mannitol dehydrogenase activity.                                                                                                           | 72.42   | 27.08  | 2.67 | 2.12E-04 | 6.88E-04 |
| 4577 | 7 | F2-3 vs. S2-3 | 264652_at  | AT1G08920 | Encodes ESL1, a transporter for monosaccharides.                                                                                                                                                                                                                                                                                                                      | 100.28  | 37.68  | 2.66 | 8.49E-05 | 3.45E-04 |
| 4578 | 7 | F2-3 vs. S2-3 | 257004_s_a | AT3G14130 | Aldolase-type TIM barrel family protein;(source:Araport11)                                                                                                                                                                                                                                                                                                            | 175.5   | 65.87  | 2.66 | 4.10E-06 | 4.02E-05 |
| 4579 | 7 | F2-3 vs. S2-3 | 256711_at  | AT3G30390 | Encodes a putative amino acid transporter.<br>Encodes a member of the fructokinase gene family. Nomenclature according to Riggs 2017 has been adopted for the family by the community (personal communication, Boernke, Callis, Granot, Boernke, and Smeekens).                                                                                                       | 839.51  | 315.04 | 2.66 | 5.62E-05 | 2.58E-04 |
| 4580 | 7 | F2-3 vs. S2-3 | 263250_at  | AT2G31390 |                                                                                                                                                                                                                                                                                                                                                                       | 105.66  | 39.87  | 2.65 | 3.20E-06 | 3.37E-05 |
| 4581 | 7 | F2-3 vs. S2-3 | 266607_at  | AT2G46300 | Late embryogenesis abundant (LEA) hydroxyproline-rich glycoprotein family;(source:Araport11)                                                                                                                                                                                                                                                                          | 38.53   | 14.56  | 2.65 | 7.61E-04 | 1.82E-03 |
| 4582 | 7 | F2-3 vs. S2-3 | 251930_at  | AT3G53780 | RHOMBOLD-like protein 4;(source:Araport11)                                                                                                                                                                                                                                                                                                                            | 426.04  | 161.03 | 2.65 | 4.80E-06 | 4.48E-05 |
| 4583 | 7 | F2-3 vs. S2-3 | 255259_at  | AT4G05020 | Mitochondrial alternative NADH dehydrogenase.<br>bifunctional sn-glycerol-3-phosphate 2-O-acyltransferase/phosphatase. Involved in cutin assembly and is functionally redundant with GPAT8.                                                                                                                                                                           | 100.75  | 38.23  | 2.64 | 1.70E-04 | 5.83E-04 |
| 4584 | 7 | F2-3 vs. S2-3 | 259430_at  | AT1G01610 |                                                                                                                                                                                                                                                                                                                                                                       | 593.99  | 226.2  | 2.63 | 1.39E-05 | 9.43E-05 |
| 4585 | 7 | F2-3 vs. S2-3 | 262801_at  | AT1G21010 | poly polymerase;(source:Araport11)                                                                                                                                                                                                                                                                                                                                    | 56.1    | 21.34  | 2.63 | 1.67E-05 | 1.07E-04 |
| 4586 | 7 | F2-3 vs. S2-3 | 258264_at  | AT3G15790 | Protein containing methyl-CpG-binding domain.Has sequence similarity to human MBD proteins.                                                                                                                                                                                                                                                                           | 50.95   | 19.38  | 2.63 | 9.54E-05 | 3.77E-04 |
| 4587 | 7 | F2-3 vs. S2-3 | 256061_at  | AT1G07040 | plant/protein;(source:Araport11)<br>Subunit of chloroplast RNA polymerase, confers the ability to recognize promoter sequences on the core enzyme                                                                                                                                                                                                                     | 106.17  | 40.47  | 2.62 | 5.85E-05 | 2.64E-04 |
| 4588 | 7 | F2-3 vs. S2-3 | 262879_at  | AT1G64860 |                                                                                                                                                                                                                                                                                                                                                                       | 212.39  | 81.09  | 2.62 | 4.50E-05 | 2.19E-04 |
| 4589 | 7 | F2-3 vs. S2-3 | 260227_at  | AT1G74450 | Plants overexpressing At1g74450 are stunted in height and have reduced male fertility.                                                                                                                                                                                                                                                                                | 150.6   | 57.52  | 2.62 | 5.49E-05 | 2.54E-04 |
| 4590 | 7 | F2-3 vs. S2-3 | 252430_at  | AT3G47470 | Encodes a chlorophyll a/b-binding protein that is more similar to the PSI Cab proteins than the PSII cab proteins. The predicted protein is about 20 amino acids shorter than most known Cab proteins.                                                                                                                                                                | 2019.43 | 770.84 | 2.62 | 7.90E-06 | 6.34E-05 |
| 4591 | 7 | F2-3 vs. S2-3 | 246968_at  | AT5G24870 | RING/U-box superfamily protein;(source:Araport11)                                                                                                                                                                                                                                                                                                                     | 47.05   | 17.96  | 2.62 | 3.23E-04 | 9.45E-04 |
| 4592 | 7 | F2-3 vs. S2-3 | 248474_at  | AT5G50850 | Transketolase family protein;(source:Araport11)                                                                                                                                                                                                                                                                                                                       | 845.18  | 322.02 | 2.62 | 1.79E-05 | 1.11E-04 |
| 4593 | 7 | F2-3 vs. S2-3 | 247694_at  | AT5G59750 | monofunctional riboflavin biosynthesis protein RIBA 3;(source:Araport11)                                                                                                                                                                                                                                                                                              | 169.75  | 64.76  | 2.62 | 4.40E-06 | 4.21E-05 |
| 4594 | 7 | F2-3 vs. S2-3 | 262505_at  | AT1G21680 | DPP6 N-terminal domain-like protein;(source:Araport11)                                                                                                                                                                                                                                                                                                                | 102.55  | 39.33  | 2.61 | 2.68E-04 | 8.19E-04 |
| 4595 | 7 | F2-3 vs. S2-3 | 260616_at  | AT1G53280 | Encodes a homolog of animal DJ-1 superfamily protein. In the A. thaliana genome, three genes encoding close homologs of human DJ-1 were identified AT3G14990 (DJ1A), AT1G53280 (DJ1B) and AT4G34020 (DJ1C). Among the three homologs, DJ1C is essential for chloroplast development and viability. It exhibits glyoxalase activity towards glyoxal and methylglyoxal. | 738.49  | 283.03 | 2.61 | 1.75E-05 | 1.10E-04 |
| 4596 | 7 | F2-3 vs. S2-3 | 267005_at  | AT2G34460 | NAD(P)-binding Rossmann-fold superfamily protein;(source:Araport11)<br>Encodes a cytochrome p450 monooxygenase. Overexpression of this gene allows fruit growth independently of fertilization. The gene is normally expressed only in floral organs(during the Arabidopsis stage 14 flower) and in the funiculus at anthesis.                                        | 175.34  | 67.12  | 2.61 | 1.50E-05 | 9.94E-05 |
| 4597 | 7 | F2-3 vs. S2-3 | 251301_at  | AT3G61880 |                                                                                                                                                                                                                                                                                                                                                                       | 45.41   | 17.43  | 2.61 | 1.03E-04 | 4.00E-04 |
| 4598 | 7 | F2-3 vs. S2-3 | 260968_at  | AT1G12250 | Pentapeptide repeat-containing protein;(source:Araport11)                                                                                                                                                                                                                                                                                                             | 118.39  | 45.58  | 2.6  | 1.08E-04 | 4.16E-04 |
| 4599 | 7 | F2-3 vs. S2-3 | 261363_at  | AT1G41830 | SKU5-similar 6;(source:Araport11)                                                                                                                                                                                                                                                                                                                                     | 300.71  | 115.74 | 2.6  | 8.18E-05 | 3.36E-04 |
| 4600 | 7 | F2-3 vs. S2-3 | 255702_at  | AT4G00230 | xylem serine peptidase 1;(source:Araport11)                                                                                                                                                                                                                                                                                                                           | 81.07   | 31.23  | 2.6  | 1.39E-05 | 9.43E-05 |
| 4601 | 7 | F2-3 vs. S2-3 | 254485_at  | AT4G20760 | NAD(P)-binding Rossmann-fold superfamily protein;(source:Araport11)<br>The gene encodes receptorlike kinase (RLK). Involved in the maintenance organization of cell files or cell morphology in conductive elements. Functions as a receptor for CEP1 peptide. Mediates nitrate uptake signaling.                                                                     | 62.25   | 23.96  | 2.6  | 3.84E-05 | 1.95E-04 |
| 4602 | 7 | F2-3 vs. S2-3 | 248590_at  | AT5G49660 |                                                                                                                                                                                                                                                                                                                                                                       | 94.87   | 36.55  | 2.6  | 4.01E-05 | 2.02E-04 |
| 4603 | 7 | F2-3 vs. S2-3 | 246392_at  | AT1G58120 | hypothetical protein;(source:Araport11)                                                                                                                                                                                                                                                                                                                               | 40.05   | 15.45  | 2.59 | 2.08E-04 | 6.81E-04 |
| 4604 | 7 | F2-3 vs. S2-3 | 266391_at  | AT2G41290 | Although this enzyme is predicted to encode a strictosidine synthase (SS), it lacks a conserved catalytic glutamate residue found in active SS enzymes and it is not expected to have SS activity.                                                                                                                                                                    | 195.01  | 75.37  | 2.59 | 6.20E-06 | 5.30E-05 |
| 4605 | 7 | F2-3 vs. S2-3 | 250339_at  | AT5G11670 | The malic enzyme (EC 1.1.1.40) encoded by AtNADP-ME2 is presumably a cytosolic enzyme involved in malate metabolism and possibly assisting the oxidative pentose phosphate pathway.                                                                                                                                                                                   | 623.7   | 240.92 | 2.59 | 6.50E-06 | 5.49E-05 |
| 4606 | 7 | F2-3 vs. S2-3 | 249701_at  | AT5G35460 | AtNADP-ME2 counts for the major part of NADP-ME activity in mature tissues of Arabidopsis.                                                                                                                                                                                                                                                                            | 247.25  | 95.34  | 2.59 | 2.30E-06 | 2.69E-05 |
| 4607 | 7 | F2-3 vs. S2-3 | 248531_at  | AT5G49950 | membrane protein;(source:Araport11)<br>alpha/beta-Hydrolases superfamily protein;(source:Araport11)                                                                                                                                                                                                                                                                   | 247.75  | 95.51  | 2.59 | 4.40E-06 | 4.21E-05 |

|      |   |               |              |           |                                                                                                                                                                                                                                                                                                                                                                                                                                                                                                                                                                                                                                                                                                                                                                                                         |         |        |      |          |          |
|------|---|---------------|--------------|-----------|---------------------------------------------------------------------------------------------------------------------------------------------------------------------------------------------------------------------------------------------------------------------------------------------------------------------------------------------------------------------------------------------------------------------------------------------------------------------------------------------------------------------------------------------------------------------------------------------------------------------------------------------------------------------------------------------------------------------------------------------------------------------------------------------------------|---------|--------|------|----------|----------|
| 4608 | 7 | F2-3 vs. S2-3 | 260222_at    | AT1G74380 | xyloglucan xylosyltransferase 5;(source:Araport11)                                                                                                                                                                                                                                                                                                                                                                                                                                                                                                                                                                                                                                                                                                                                                      | 112.52  | 43.57  | 2.58 | 2.75E-04 | 8.35E-04 |
| 4609 | 7 | F2-3 vs. S2-3 | 267612_at    | AT2G26690 | Major facilitator superfamily protein;(source:Araport11)                                                                                                                                                                                                                                                                                                                                                                                                                                                                                                                                                                                                                                                                                                                                                | 54.65   | 21.19  | 2.58 | 1.45E-05 | 9.72E-05 |
| 4610 | 7 | F2-3 vs. S2-3 | 266363_at    | AT2G41250 | Haloacid dehalogenase-like hydrolase (HAD) superfamily protein;(source:Araport11)<br>Encodes a protein disulfide isomerase-like (PDIL) protein, a member of a multigene family within the thioredoxin (TRX) superfamily. This protein also belongs to the adenosine 5'-phosphosulfate reductase-like (APRL) group.                                                                                                                                                                                                                                                                                                                                                                                                                                                                                      | 51.81   | 20.09  | 2.58 | 2.03E-05 | 1.23E-04 |
| 4611 | 7 | F2-3 vs. S2-3 | 254343_at    | AT4G21990 |                                                                                                                                                                                                                                                                                                                                                                                                                                                                                                                                                                                                                                                                                                                                                                                                         | 348.55  | 134.93 | 2.58 | 6.89E-05 | 2.95E-04 |
| 4612 | 7 | F2-3 vs. S2-3 | 256387_at    | AT3G06170 | Serinc-domain containing serine and sphingolipid biosynthesis protein;(source:Araport11)                                                                                                                                                                                                                                                                                                                                                                                                                                                                                                                                                                                                                                                                                                                | 414.01  | 160.93 | 2.57 | 1.64E-05 | 1.05E-04 |
| 4613 | 7 | F2-3 vs. S2-3 | 258063_at    | AT3G14620 | putative cytochrome P450 The mRNA is cell-to-cell mobile.<br><br>Encodes cytochrome c. Promoter directs preferential expression in vascular tissues of cotyledons, leaves, roots, and hypocotyls, and in anthers. Double mutants with CYTC-1 accumulate starch during the day, have delayed growth and development and reduced GA and DELLA proteins linking cellular metabolism and GA homeostasis.                                                                                                                                                                                                                                                                                                                                                                                                    | 38.71   | 15.05  | 2.57 | 5.60E-05 | 2.57E-04 |
| 4614 | 7 | F2-3 vs. S2-3 | 255011_at    | AT4G10040 | Encodes a protein with mitochondrial serine hydroxymethyltransferase activity, which functions in the photorespiratory pathway, catalyzes the conversion of serine and tetrahydrofolate to glycine and 5,10-methylene tetrahydrofolate. Involved in controlling cell damage caused by abiotic stress, such as high light and salt and the hypersensitive defense response of plants.                                                                                                                                                                                                                                                                                                                                                                                                                    | 149.87  | 58.3   | 2.57 | 9.90E-06 | 7.47E-05 |
| 4615 | 7 | F2-3 vs. S2-3 | 253009_at    | AT4G37930 | member of Anion channel protein family                                                                                                                                                                                                                                                                                                                                                                                                                                                                                                                                                                                                                                                                                                                                                                  | 2404.87 | 933.96 | 2.57 | 4.50E-06 | 4.27E-05 |
| 4616 | 7 | F2-3 vs. S2-3 | 248580_at    | AT5G49890 |                                                                                                                                                                                                                                                                                                                                                                                                                                                                                                                                                                                                                                                                                                                                                                                                         | 327.11  | 127.29 | 2.57 | 3.30E-06 | 3.44E-05 |
| 4617 | 7 | F2-3 vs. S2-3 | 262073_at    | AT1G59640 | A basic helix-loop-helix encoding gene (BIGPETAL, BPE) involved in the control of petal size. BPE is expressed via two mRNAs derived from an alternative splicing event. The BPEub (AT1G59640.1)transcript is expressed ubiquitously, whereas the BPEp (AT1G59640.2) transcript is preferentially expressed in petals. Plants that lack the petal-expressed variant BPEp have larger petals as a result of increased cell size. BPEp is positively regulated downstream of APETALA3, PISTILLATA, APETALA1 and PISTILLATA3 and is negatively regulated downstream of AGAMOUS. encodes a desulfoglucosinolate sulfotransferase, involved in the final step of glucosinolate core structure biosynthesis. Has a broad-substrate specificity with preference with methionine-derived desulfoglucosinolates. | 80.24   | 31.29  | 2.56 | 2.15E-04 | 6.93E-04 |
| 4618 | 7 | F2-3 vs. S2-3 | 260385_at    | AT1G74090 |                                                                                                                                                                                                                                                                                                                                                                                                                                                                                                                                                                                                                                                                                                                                                                                                         | 160.7   | 62.88  | 2.56 | 8.50E-06 | 6.72E-05 |
| 4619 | 7 | F2-3 vs. S2-3 | 258619_at    | AT3G02780 | Encodes a protein with isopentenyl diphosphate:dimethylallyl diphosphate isomerase activity. There is genetic evidence that it functions in the mevalonate, but not the MEP biosynthetic pathway. Sequence similarity of DEAD-box RNA helicases. Binds RNA and DNA. Involved in drought, salt and cold stress responses.The mRNA is cell-to-cell mobile. Functions as a host factor to promote TuMV replication.                                                                                                                                                                                                                                                                                                                                                                                        | 444.96  | 173.65 | 2.56 | 1.42E-05 | 9.57E-05 |
| 4620 | 7 | F2-3 vs. S2-3 | 258449_s_at  | AT3G22310 | Member of Actin gene family.Mutants are defective in germination and root growth. The mRNA is cell-to-cell mobile.                                                                                                                                                                                                                                                                                                                                                                                                                                                                                                                                                                                                                                                                                      | 551.04  | 215.66 | 2.56 | 5.39E-05 | 2.50E-04 |
| 4621 | 7 | F2-3 vs. S2-3 | Actin-5_s_at | AT5G09810 | Cytosolic ribose-5-phosphate isomerase. Knockout mutation causes chloroplast dysfunction, late flowering and premature cell death.                                                                                                                                                                                                                                                                                                                                                                                                                                                                                                                                                                                                                                                                      | 75.32   | 29.58  | 2.55 | 1.22E-04 | 4.53E-04 |
| 4622 | 7 | F2-3 vs. S2-3 | 265742_at    | AT2G01290 | Adenine nucleotide alpha hydrolases-like superfamily protein;(source:Araport11)                                                                                                                                                                                                                                                                                                                                                                                                                                                                                                                                                                                                                                                                                                                         | 40.06   | 15.71  | 2.55 | 5.60E-05 | 2.57E-04 |
| 4623 | 7 | F2-3 vs. S2-3 | 258727_at    | AT3G11930 | citrate synthase 5;(source:Araport11)                                                                                                                                                                                                                                                                                                                                                                                                                                                                                                                                                                                                                                                                                                                                                                   | 209.21  | 81.95  | 2.55 | 2.10E-06 | 2.53E-05 |
| 4624 | 7 | F2-3 vs. S2-3 | 251455_at    | AT3G60100 | Encodes the only subunit of photosystem I located entirely in the thylakoid lumen. May be involved in the interaction between plastocyanin and the photosystem I complex. Phosphorylation of this protein is dependent on calcium.                                                                                                                                                                                                                                                                                                                                                                                                                                                                                                                                                                      | 34.94   | 13.7   | 2.55 | 4.40E-06 | 4.21E-05 |
| 4625 | 7 | F2-3 vs. S2-3 | 247320_at    | AT5G64040 |                                                                                                                                                                                                                                                                                                                                                                                                                                                                                                                                                                                                                                                                                                                                                                                                         | 1676.28 | 656.51 | 2.55 | 5.10E-06 | 4.67E-05 |
| 4626 | 7 | F2-3 vs. S2-3 | 253358_at    | AT4G32940 | Encodes a vacuolar processing enzyme belonging to a novel group of cysteine proteinases that is expressed in vegetative organs and is upregulated in association with various types of cell death and under stressed conditions. They are essential in processing seed storage proteins and for mediating the susceptible response of toxin-induced cell death.                                                                                                                                                                                                                                                                                                                                                                                                                                         | 260.19  | 102.63 | 2.54 | 4.00E-06 | 3.95E-05 |
| 4627 | 7 | F2-3 vs. S2-3 | 262323_at    | AT1G64190 | 6-phosphogluconate dehydrogenase family protein;(source:Araport11)                                                                                                                                                                                                                                                                                                                                                                                                                                                                                                                                                                                                                                                                                                                                      | 486.23  | 192.47 | 2.53 | 7.59E-05 | 3.18E-04 |
| 4628 | 7 | F2-3 vs. S2-3 | 252394_at    | AT3G47940 | DNAJ heat shock family protein;(source:Araport11)<br>Encodes a phloem-specific iron transporter that is essential for systemic iron signaling and redistribution of iron and cadmium. It loads iron into the phloem, facilitates iron recirculation from the xylem to the phloem, and regulates both shoot-to-root iron signaling and iron redistribution from mature to developing tissues.                                                                                                                                                                                                                                                                                                                                                                                                            | 63.93   | 25.25  | 2.53 | 7.10E-06 | 5.88E-05 |
| 4629 | 7 | F2-3 vs. S2-3 | 245296_at    | AT4G16370 |                                                                                                                                                                                                                                                                                                                                                                                                                                                                                                                                                                                                                                                                                                                                                                                                         | 477.8   | 189.12 | 2.53 | 2.11E-04 | 6.85E-04 |

|      |   |               |            |           |                                                                                                                                                                                                                                                                                                                                                                                                                                                                                                                                                                                                                                                                                                  |         |        |      |          |          |
|------|---|---------------|------------|-----------|--------------------------------------------------------------------------------------------------------------------------------------------------------------------------------------------------------------------------------------------------------------------------------------------------------------------------------------------------------------------------------------------------------------------------------------------------------------------------------------------------------------------------------------------------------------------------------------------------------------------------------------------------------------------------------------------------|---------|--------|------|----------|----------|
| 4630 | 7 | F2-3 vs. S2-3 | 246516_at  | AT5G15740 | RRT1 is a member of a novel glycosyltransferase family in plants. It functions as a rhamnosyltransferase, elongating the RG-1 backbone. It functions during seed coat mucilage development.                                                                                                                                                                                                                                                                                                                                                                                                                                                                                                      | 132.36  | 52.37  | 2.53 | 4.30E-04 | 1.18E-03 |
| 4631 | 7 | F2-3 vs. S2-3 | 247979_at  | AT5G56750 | AGB1/AGG dimmer interacting protein, response to water deficit.                                                                                                                                                                                                                                                                                                                                                                                                                                                                                                                                                                                                                                  | 38.19   | 15.07  | 2.53 | 5.90E-06 | 5.12E-05 |
| 4632 | 7 | F2-3 vs. S2-3 | 260730_at  | AT1G48030 | Encodes a mitochondrial lipoamide dehydrogenase whose expression is induced by light. ALD1 is a L-lysine alpha-aminotransferase. It is part of the pipercolic acid biosynthetic pathway, where it catalyzes the biochemical conversion of lysine to epsilon-amino-alpha-ketocaproic acid (KAC) which is subject to subsequent transamination, cyclization and isomerization to form 2,3-dehydroipicolic acid.                                                                                                                                                                                                                                                                                    | 393.19  | 156.28 | 2.52 | 1.17E-05 | 8.37E-05 |
| 4633 | 7 | F2-3 vs. S2-3 | 265658_at  | AT2G13810 | S-adenosyl-L-methionine-dependent methyltransferases superfamily protein;(source:Araport11)                                                                                                                                                                                                                                                                                                                                                                                                                                                                                                                                                                                                      | 50.61   | 20.07  | 2.52 | 7.36E-05 | 3.09E-04 |
| 4634 | 7 | F2-3 vs. S2-3 | 267040_at  | AT2G34300 | Protein kinase superfamily protein;(source:Araport11)                                                                                                                                                                                                                                                                                                                                                                                                                                                                                                                                                                                                                                            | 268.85  | 106.5  | 2.52 | 1.12E-04 | 4.25E-04 |
| 4635 | 7 | F2-3 vs. S2-3 | 257253_at  | AT3G24190 | Encodes a phosphoserine aminotransferase which is involved in serine biosynthesis in the chloroplast which operates via the phosphorylated pathway. The mRNA is cell-to-cell mobile.                                                                                                                                                                                                                                                                                                                                                                                                                                                                                                             | 80.48   | 31.99  | 2.52 | 8.86E-05 | 3.58E-04 |
| 4636 | 7 | F2-3 vs. S2-3 | 253162_at  | AT4G35630 | Encodes a methionine aminopeptidase formerly called MAP1B, renamed to MAP1C.                                                                                                                                                                                                                                                                                                                                                                                                                                                                                                                                                                                                                     | 1401.74 | 558.02 | 2.51 | 6.90E-06 | 5.76E-05 |
| 4637 | 7 | F2-3 vs. S2-3 | 259363_at  | AT1G13270 | Encodes a methionine-specific aminotransferase that uses the ethylene biosynthetic intermediate methionine as an amino donor and the auxin biosynthetic intermediate indole-3-pyruvic acid as an amino acceptor to produce L-tryptophan and 2-oxo-4-methylthiobutyric acid. These actions allow VAS1 to coordinate both auxin and ethylene biosynthesis. It functions downstream of TAA1/SAV3 but upstream of YUCs to negatively modulate IAA biosynthesis directly by altering the 3-IPA pool.                                                                                                                                                                                                  | 471.97  | 189.1  | 2.5  | 5.50E-06 | 4.90E-05 |
| 4638 | 7 | F2-3 vs. S2-3 | 260328_at  | AT1G80360 | SOUL heme-binding family protein;(source:Araport11)                                                                                                                                                                                                                                                                                                                                                                                                                                                                                                                                                                                                                                              | 168.14  | 67.37  | 2.5  | 1.38E-05 | 9.39E-05 |
| 4639 | 7 | F2-3 vs. S2-3 | 266097_at  | AT2G37970 | E3 ubiquitin-protein ligase;(source:Araport11)                                                                                                                                                                                                                                                                                                                                                                                                                                                                                                                                                                                                                                                   | 168.75  | 67.41  | 2.5  | 1.17E-05 | 8.37E-05 |
| 4640 | 7 | F2-3 vs. S2-3 | 256624_at  | AT3G19990 | Pleckstrin homology (PH) and lipid-binding START domains-containing protein;(source:Araport11)                                                                                                                                                                                                                                                                                                                                                                                                                                                                                                                                                                                                   | 175.53  | 70.15  | 2.5  | 6.59E-05 | 2.86E-04 |
| 4641 | 7 | F2-3 vs. S2-3 | 251854_at  | AT3G54800 | Lesion mimic phenotype when mutation in the gene is combined with a mutation in ACA4. Lesion mimic phenotype of double knockout can be suppressed by nutritional supplements that increase anion levels (e.g. 15 mM Nitrate, Chloride, or Phosphate)                                                                                                                                                                                                                                                                                                                                                                                                                                             | 24.86   | 9.96   | 2.5  | 3.37E-05 | 1.78E-04 |
| 4642 | 7 | F2-3 vs. S2-3 | 251649_at  | AT3G57330 | Encodes a cellulose synthase isomer, related to CESA6. As inferred from the null role of secondary wall-type CesAs, included in a set of five primary wall-type CesAs that may support trichome cell wall thickening. The mRNA is cell-to-cell mobile.                                                                                                                                                                                                                                                                                                                                                                                                                                           | 99.18   | 39.64  | 2.5  | 1.80E-05 | 1.12E-04 |
| 4643 | 7 | F2-3 vs. S2-3 | 252886_at  | AT4G39350 | nudix hydrolase homolog 20;(source:Araport11)                                                                                                                                                                                                                                                                                                                                                                                                                                                                                                                                                                                                                                                    | 64.45   | 25.8   | 2.5  | 1.22E-05 | 8.58E-05 |
| 4644 | 7 | F2-3 vs. S2-3 | 246038_s_a | AT5G19460 | Encodes a zinc transporter ZIF2. Expression of ZIF2 is regulated by alternative splicing. encodes a member of SNF1-related protein kinases (SnRK2) whose activity is activated by ionic (salt) and non-ionic (mannitol) osmotic stress.                                                                                                                                                                                                                                                                                                                                                                                                                                                          | 139.65  | 55.95  | 2.5  | 8.90E-06 | 6.93E-05 |
| 4645 | 7 | F2-3 vs. S2-3 | 265768_at  | AT2G48020 | phosphoribulokinase;(source:Araport11)                                                                                                                                                                                                                                                                                                                                                                                                                                                                                                                                                                                                                                                           | 802.32  | 322.79 | 2.49 | 3.10E-06 | 3.28E-05 |
| 4646 | 7 | F2-3 vs. S2-3 | 252872_at  | AT4G40010 | Encodes a member of the MIKC (MADS box, Keratin binding domain, and C terminal domain containing )family of transcriptional regulators. AGL66 is expressed in pollen.It forms heterodimers with other MIKC family members (AGL104). Involved in late stages of pollen development and pollen tube growth.                                                                                                                                                                                                                                                                                                                                                                                        | 177.68  | 71.33  | 2.49 | 2.37E-04 | 7.45E-04 |
| 4647 | 7 | F2-3 vs. S2-3 | 255720_at  | AT1G32060 | Encodes an aconitase that can catalyze the conversion of citrate to isocitrate through a cis-aconitate intermediate, indicating that it may participate in the TCA cycle and other primary metabolic pathways. The protein is believed to accumulate in the mitochondria and the cytosol. It affects CSD2 (At2g28190 - a superoxide dismutase) transcript levels and may play a role in the response to oxidative stress. One member of the family (ACO1 - At35830) was shown to specifically bind to the 5' UTR of CSD2 in vitro. ACO3 is tyrosine-phosphorylated and its phosphorylation state is modulated in response to ABA in Arabidopsis thaliana seeds. The mRNA is cell-to-cell mobile. | 59.43   | 24.01  | 2.48 | 5.82E-04 | 1.49E-03 |
| 4648 | 7 | F2-3 vs. S2-3 | 262179_at  | AT1G77980 |                                                                                                                                                                                                                                                                                                                                                                                                                                                                                                                                                                                                                                                                                                  | 41.99   | 16.9   | 2.48 | 1.76E-05 | 1.10E-04 |
| 4649 | 7 | F2-3 vs. S2-3 | 263348_at  | AT2G05710 |                                                                                                                                                                                                                                                                                                                                                                                                                                                                                                                                                                                                                                                                                                  | 437.87  | 176.86 | 2.48 | 2.17E-05 | 1.29E-04 |

|      |   |               |           |           |                                                                                                                                                                                                                                                                                                                                                                                                                                                                                                                                                                                           |         |        |      |          |          |
|------|---|---------------|-----------|-----------|-------------------------------------------------------------------------------------------------------------------------------------------------------------------------------------------------------------------------------------------------------------------------------------------------------------------------------------------------------------------------------------------------------------------------------------------------------------------------------------------------------------------------------------------------------------------------------------------|---------|--------|------|----------|----------|
| 4650 | 7 | F2-3 vs. S2-3 | 261211_at | AT1G12780 | Encodes a UDP-glucose epimerase that catalyzes the interconversion of the sugar nucleotides UDP-glucose UDP-galactose via a UDP-4-keto-hexose intermediate. Responsive to stress.                                                                                                                                                                                                                                                                                                                                                                                                         | 638.77  | 258.59 | 2.47 | 5.96E-04 | 1.52E-03 |
| 4651 | 7 | F2-3 vs. S2-3 | 264284_at | AT1G61860 | Protein kinase superfamily protein;(source:Araport11)<br>Encodes HYR1, a UDP glycosyltransferase (UGT). HYR1 glucosylates hypostatin, an inhibitor of cell expansion in vivo to form a bioactive glucoside.                                                                                                                                                                                                                                                                                                                                                                               | 29.53   | 11.95  | 2.47 | 4.59E-05 | 2.23E-04 |
| 4652 | 7 | F2-3 vs. S2-3 | 257954_at | AT3G21760 |                                                                                                                                                                                                                                                                                                                                                                                                                                                                                                                                                                                           | 60.56   | 24.53  | 2.47 | 5.26E-04 | 1.38E-03 |
| 4653 | 7 | F2-3 vs. S2-3 | 247741_at | AT5G58960 | Mutant plants display impaired light-regulation of the hypocotyl randomization response.                                                                                                                                                                                                                                                                                                                                                                                                                                                                                                  | 905.89  | 366.12 | 2.47 | 1.91E-04 | 6.36E-04 |
| 4654 | 7 | F2-3 vs. S2-3 | 259527_at | AT1G12600 | UDP-N-acetylglucosamine (UAA) transporter family;(source:Araport11)                                                                                                                                                                                                                                                                                                                                                                                                                                                                                                                       | 79.05   | 32.19  | 2.46 | 1.81E-04 | 6.11E-04 |
| 4655 | 7 | F2-3 vs. S2-3 | 261135_at | AT1G19610 | Predicted to encode a PR (pathogenesis-related) protein. Belongs to the plant defensin (PDF) family with the following members: At1g75830/PDF1.1, At5g44420/PDF1.2a, At2g26020/PDF1.2b, At5g44430/PDF1.2c, At2g26010/PDF1.3, At1g19610/PDF1.4, At1g55010/PDF1.5, At2g02120/PDF2.1, At2g02100/PDF2.2, At2g02130/PDF2.3, At1g61070/PDF2.4, At5g63660/PDF2.5, At2g02140/PDF2.6, At5g38330/PDF3.1 and At4g30070/PDF3.2.                                                                                                                                                                       | 39.74   | 16.13  | 2.46 | 2.80E-06 | 3.09E-05 |
| 4656 | 7 | F2-3 vs. S2-3 | 245981_at | AT5G13100 | Gap junction beta-4 protein;(source:Araport11)<br><br>Homolog to AT5G22940, a member of glycosyltransferase family 47 that is involved in secondary cell wall biosynthesis. It exhibits high sequence similarity to tobacco (Nicotiana plumbaginifolia) pectin glucuronyltransferase. Protein has a domain that shares significant similarity with the pfam03016 domain. It is expressed specifically in developing vessels and fiber cells, and FRA8 is targeted to Golgi. Mutants have irregular xylem formation, reduced cellulose levels and plants are smaller than normal siblings. | 401.14  | 163.02 | 2.46 | 7.50E-06 | 6.08E-05 |
| 4657 | 7 | F2-3 vs. S2-3 | 266156_at | AT2G28110 | Aldolase superfamily protein;(source:Araport11)                                                                                                                                                                                                                                                                                                                                                                                                                                                                                                                                           | 41.14   | 16.77  | 2.45 | 4.23E-05 | 2.11E-04 |
| 4658 | 7 | F2-3 vs. S2-3 | 260967_at | AT1G12230 |                                                                                                                                                                                                                                                                                                                                                                                                                                                                                                                                                                                           | 252.2   | 103.3  | 2.44 | 3.64E-05 | 1.89E-04 |
| 4659 | 7 | F2-3 vs. S2-3 | 263598_at | AT2G01850 | EXGT-A3 has homology to xyloglucan endotransglucosylases/hydrolases (XTHs). Mutants in this gene show a lesion mimic phenotype associated with leaf maturation and a reduction in the number of tertiary veins. Individual tracheary elements in the mutants are shorter, but phloem transport activity is not severely affected. EXGT-A3 plays a role in xyloglucan degradation in the differentiating tracheary elements of rosette leaves. The mRNA is cell-to-cell mobile.                                                                                                            | 221.23  | 90.52  | 2.44 | 4.16E-05 | 2.08E-04 |
| 4660 | 7 | F2-3 vs. S2-3 | 255587_at | AT4G01480 | Encodes a protein that might have inorganic pyrophosphatase activity.                                                                                                                                                                                                                                                                                                                                                                                                                                                                                                                     | 49.19   | 20.12  | 2.44 | 5.60E-06 | 4.97E-05 |
| 4661 | 7 | F2-3 vs. S2-3 | 254608_at | AT4G18910 | Encodes an aquaporin homolog. Functions in arsenite transport and tolerance. When expressed in yeast cells can conduct hydrogen peroxide into those cells.<br>One of three isoforms of the iron-sulfur component of the succinate dehydrogenase complex, a component of the mitochondrial respiratory chain complex II. The product of the nuclear encoded gene is imported into the mitochondrion. Expressed during germination and post-germinative growth.                                                                                                                             | 36.98   | 15.18  | 2.44 | 2.95E-05 | 1.60E-04 |
| 4662 | 7 | F2-3 vs. S2-3 | 249343_at | AT5G40650 |                                                                                                                                                                                                                                                                                                                                                                                                                                                                                                                                                                                           | 1215.82 | 499.17 | 2.44 | 5.03E-05 | 2.38E-04 |
| 4663 | 7 | F2-3 vs. S2-3 | 248164_at | AT5G54490 | Encodes a PINOID (PID)-binding protein containing putative EF-hand calcium-binding motifs. The interaction is dependent on the presence of calcium. mRNA expression is up-regulated by auxin. Not a phosphorylation target of PID, likely acts upstream of PID to regulate the activity of this protein in response to changes in calcium levels.                                                                                                                                                                                                                                         | 103.06  | 42.27  | 2.44 | 1.07E-04 | 4.10E-04 |
| 4664 | 7 | F2-3 vs. S2-3 | 264609_at | AT1G04530 | Encodes one of the 36 carboxylate clamp (CC)-tetratricopeptide repeat (TPR) proteins (Prasad 2010, Pubmed ID: 20856808) with potential to interact with Hsp90/Hsp70 as co-chaperones.                                                                                                                                                                                                                                                                                                                                                                                                     | 151.25  | 62.35  | 2.43 | 2.90E-05 | 1.58E-04 |
| 4665 | 7 | F2-3 vs. S2-3 | 262637_at | AT1G06640 | encodes a protein whose sequence is similar to a 2-oxoglutarate-dependent dioxygenase The mRNA is cell-to-cell mobile.                                                                                                                                                                                                                                                                                                                                                                                                                                                                    | 283.29  | 116.72 | 2.43 | 1.16E-05 | 8.35E-05 |
| 4666 | 7 | F2-3 vs. S2-3 | 262850_at | AT1G14920 | Similar to a putative transcription factor and transcriptional coactivators. Repressor of GA responses and involved in gibberellic acid mediated signaling. Member of the DELLA proteins that restrain the cell proliferation and expansion that drives plant growth. The protein undergoes degradation in response to GA via the 26S proteasome. GAI may be involved in reducing ROS accumulation in response to stress by up-regulating the transcription of superoxide dismutases. Represses GA-induced vegetative growth and floral initiation. Rapidly degraded in response to GA.   | 635.66  | 261.32 | 2.43 | 4.79E-04 | 1.28E-03 |
| 4667 | 7 | F2-3 vs. S2-3 | 264000_at | AT2G22500 | Encodes one of the mitochondrial dicarboxylate carriers (DIC): DIC1 (AT2G22500), DIC2 (AT4G24570), DIC3 (AT5G09470).                                                                                                                                                                                                                                                                                                                                                                                                                                                                      | 488.86  | 200.9  | 2.43 | 3.04E-04 | 9.04E-04 |



|      |   |               |           |           |                                                                                                                                                                                                                                                                                                                                                                                                                                                                 |         |         |      |          |          |
|------|---|---------------|-----------|-----------|-----------------------------------------------------------------------------------------------------------------------------------------------------------------------------------------------------------------------------------------------------------------------------------------------------------------------------------------------------------------------------------------------------------------------------------------------------------------|---------|---------|------|----------|----------|
| 4668 | 7 | F2-3 vs. S2-3 | 245053_at | AT2G26450 | Plant invertase/pectin methylesterase inhibitor superfamily;(source:Araport11)                                                                                                                                                                                                                                                                                                                                                                                  | 26.21   | 10.79   | 2.43 | 4.28E-04 | 1.17E-03 |
| 4669 | 7 | F2-3 vs. S2-3 | 267423_at | AT2G35060 | potassium transporter                                                                                                                                                                                                                                                                                                                                                                                                                                           | 62.76   | 25.8    | 2.43 | 5.52E-04 | 1.43E-03 |
| 4670 | 7 | F2-3 vs. S2-3 | 253512_at | AT4G31750 | Encodes HopW1-1-Interacting protein 2 (WIN2). Interacts with the P. syringae effector HopW1-1. WIN2 has protein phosphatase activity. Modulates plant defenses against bacteria. Three WIN proteins are identified so far (WIN1: AT1G80600; WIN2: AT4G31750; WIN3: AT5G13320).                                                                                                                                                                                  | 405.99  | 167.24  | 2.43 | 1.49E-05 | 9.94E-05 |
| 4671 | 7 | F2-3 vs. S2-3 | 247304_at | AT5G63850 | Amino acid transporter whose expression is downregulated by dehydration.                                                                                                                                                                                                                                                                                                                                                                                        | 44.27   | 18.25   | 2.43 | 1.96E-04 | 6.48E-04 |
| 4672 | 7 | F2-3 vs. S2-3 | 245015_at | ATCG00490 | large subunit of RUBISCO. Protein is tyrosine-phosphorylated and its phosphorylation state is modulated in response to ABA in Arabidopsis thaliana seeds.                                                                                                                                                                                                                                                                                                       | 2820.07 | 1158.41 | 2.43 | 4.50E-05 | 2.19E-04 |
| 4673 | 7 | F2-3 vs. S2-3 | 262428_at | AT1G47570 | RING/U-box superfamily protein;(source:Araport11)                                                                                                                                                                                                                                                                                                                                                                                                               | 152.58  | 63.14   | 2.42 | 1.55E-04 | 5.45E-04 |
| 4674 | 7 | F2-3 vs. S2-3 | 263368_at | AT2G20470 | AGC (cAMP-dependent, cGMP-dependent and protein kinase C) kinase family protein;(source:Araport11)                                                                                                                                                                                                                                                                                                                                                              | 50.09   | 20.66   | 2.42 | 1.63E-04 | 5.64E-04 |
| 4675 | 7 | F2-3 vs. S2-3 | 245216_at | AT4G16143 | Protein interacts with Agrobacterium proteins VirD2 and VirE2. Is not individually essential for Agrobacterium-mediated root transformation, but when overexpressed can rescue the impa-4 decreased transformation susceptibility phenotype.                                                                                                                                                                                                                    | 68.97   | 28.49   | 2.42 | 2.23E-05 | 1.31E-04 |
| 4676 | 7 | F2-3 vs. S2-3 | 248467_at | AT5G50800 | Encodes a member of the SWEET sucrose efflux transporter family proteins, together with RPG1, it is involved in pollen development. Together with SWEET14, it is likely involved in modulating the GA response and is required for proper development of anthers, seeds and seedlings.                                                                                                                                                                          | 59.76   | 24.68   | 2.42 | 2.67E-05 | 1.50E-04 |
| 4677 | 7 | F2-3 vs. S2-3 | 264738_at | AT1G62250 | orotidine 5-phosphate decarboxylase;(source:Araport11)                                                                                                                                                                                                                                                                                                                                                                                                          | 79.86   | 33.2    | 2.41 | 6.62E-05 | 2.87E-04 |
| 4678 | 7 | F2-3 vs. S2-3 | 264848_at | AT2G17350 | beta-mannosyltransferase-like protein;(source:Araport11)                                                                                                                                                                                                                                                                                                                                                                                                        | 225.79  | 93.85   | 2.41 | 3.02E-04 | 9.00E-04 |
| 4679 | 7 | F2-3 vs. S2-3 | 263985_at | AT2G42750 | DNAJ heat shock N-terminal domain-containing protein;(source:Araport11)                                                                                                                                                                                                                                                                                                                                                                                         | 312.89  | 129.66  | 2.41 | 2.03E-05 | 1.23E-04 |
| 4680 | 7 | F2-3 vs. S2-3 | 258188_at | AT3G17800 | mRNA level of the MEB5.2 gene (At3g17800) remains unchanged after cutting the inflorescence stem                                                                                                                                                                                                                                                                                                                                                                | 183.79  | 76.26   | 2.41 | 6.28E-05 | 2.77E-04 |
| 4681 | 7 | F2-3 vs. S2-3 | 251557_at | AT3G58730 | vacuolar ATP synthase subunit D (VATD) / V-ATPase D subunit / vacuolar proton pump D subunit (VATPD);(source:Araport11)                                                                                                                                                                                                                                                                                                                                         | 153.06  | 63.43   | 2.41 | 8.60E-06 | 6.77E-05 |
| 4682 | 7 | F2-3 vs. S2-3 | 253788_at | AT4G28680 | Encodes a stress-induced tyrosine decarboxylase (TyrDC). Recombinant (His)6-TyrDC expressed in E. coli catalyzes the conversion of L-tyrosine to tyramine. Recombinant TyrDC forms tetramers.                                                                                                                                                                                                                                                                   | 46.09   | 19.11   | 2.41 | 1.78E-05 | 1.11E-04 |
| 4683 | 7 | F2-3 vs. S2-3 | 253191_at | AT4G35350 | tracheary element vacuolar protein                                                                                                                                                                                                                                                                                                                                                                                                                              | 178.47  | 74.15   | 2.41 | 6.66E-05 | 2.88E-04 |
| 4684 | 7 | F2-3 vs. S2-3 | 250204_at | AT5G13990 | A member of EXO70 gene family, putative exocyst subunits, conserved in land plants. Arabidopsis thaliana contains 23 putative EXO70 genes, which can be classified into eight clusters on the phylogenetic tree. This particular member is expressed in pollen and is involved in pollen tube elongation. Found in the cytoplasm and surprisingly, not found in the plasma membrane and is not found to colocalize with or interact with core exocyst subunits. | 36.75   | 15.23   | 2.41 | 3.21E-05 | 1.71E-04 |
| 4685 | 7 | F2-3 vs. S2-3 | 259736_at | AT1G64390 | glycosyl hydrolase 9C2;(source:Araport11)                                                                                                                                                                                                                                                                                                                                                                                                                       | 277.94  | 115.91  | 2.4  | 2.52E-04 | 7.76E-04 |
| 4686 | 7 | F2-3 vs. S2-3 | 264102_at | AT1G79270 | evolutionarily conserved C-terminal region 8;(source:Araport11)                                                                                                                                                                                                                                                                                                                                                                                                 | 24.05   | 10.03   | 2.4  | 7.60E-06 | 6.14E-05 |
| 4687 | 7 | F2-3 vs. S2-3 | 266898_at | AT2G45990 | ribosomal RNA small subunit methyltransferase G;(source:Araport11)                                                                                                                                                                                                                                                                                                                                                                                              | 375.56  | 156.46  | 2.4  | 4.47E-04 | 1.21E-03 |
| 4688 | 7 | F2-3 vs. S2-3 | 256328_at | AT3G02360 | 6-phosphogluconate dehydrogenase family protein;(source:Araport11)                                                                                                                                                                                                                                                                                                                                                                                              | 607.09  | 253.18  | 2.4  | 3.80E-05 | 1.94E-04 |
| 4689 | 7 | F2-3 vs. S2-3 | 258605_at | AT3G02970 | EXORDIUM like 6;(source:Araport11)                                                                                                                                                                                                                                                                                                                                                                                                                              | 23.58   | 9.82    | 2.4  | 4.41E-05 | 2.17E-04 |
| 4690 | 7 | F2-3 vs. S2-3 | 258647_at | AT3G07870 | FBX92 is an F-box containing protein. Overexpression produces plants with smaller leaves while reduced expression is correlated with increased leaf size and increased rates of cell proliferation.                                                                                                                                                                                                                                                             | 35.21   | 14.69   | 2.4  | 8.90E-06 | 6.93E-05 |
| 4691 | 7 | F2-3 vs. S2-3 | 258406_at | AT3G17611 | RHOMBOID-like protein 14;(source:Araport11)                                                                                                                                                                                                                                                                                                                                                                                                                     | 139.54  | 58.1    | 2.4  | 3.09E-04 | 9.14E-04 |
| 4692 | 7 | F2-3 vs. S2-3 | 252395_at | AT3G47950 | mutant has Slight reduction in root and shoot growth; Exaggerated defects in salt stress; Plasma Membrane H+ ATPase                                                                                                                                                                                                                                                                                                                                             | 106.82  | 44.44   | 2.4  | 6.41E-05 | 2.81E-04 |
| 4693 | 7 | F2-3 vs. S2-3 | 253277_at | AT4G34230 | Encodes a catalytically active cinnamyl alcohol dehydrogenase which uses p-coumaraldehyde as a preferred substrate. It can also use sinapyl, caffeyl, coniferyl and d-hydroxyconiferyl aldehydes as substrates.                                                                                                                                                                                                                                                 | 149.85  | 62.53   | 2.4  | 1.49E-05 | 9.94E-05 |
| 4694 | 7 | F2-3 vs. S2-3 | 262526_at | AT1G17050 | Encodes one of the two paralogous solanesyl diphosphate synthases - SPS1 (At1g78510) and SPS2 (At1g17050) - that assemble the side-chain of plastoquinone-9 in plastids.                                                                                                                                                                                                                                                                                        | 89.17   | 37.35   | 2.39 | 1.75E-05 | 1.10E-04 |
| 4695 | 7 | F2-3 vs. S2-3 | 260308_at | AT1G70610 | member of TAP subfamily                                                                                                                                                                                                                                                                                                                                                                                                                                         | 124.23  | 51.98   | 2.39 | 7.00E-04 | 1.72E-03 |

|      |   |               |            |           |                                                                                                                                                                                                                                                                                                                                                                                                                                                                                                                                                                                                                                                                                                      |         |        |      |          |          |
|------|---|---------------|------------|-----------|------------------------------------------------------------------------------------------------------------------------------------------------------------------------------------------------------------------------------------------------------------------------------------------------------------------------------------------------------------------------------------------------------------------------------------------------------------------------------------------------------------------------------------------------------------------------------------------------------------------------------------------------------------------------------------------------------|---------|--------|------|----------|----------|
| 4696 | 7 | F2-3 vs. S2-3 | 258336_at  | AT3G16050 | Encodes a protein with pyridoxal phosphate synthase activity whose transcripts were detected mostly in roots and accumulate during senescence. The protein was found in very low abundance, which prevented a specific localisation.                                                                                                                                                                                                                                                                                                                                                                                                                                                                 | 369.9   | 155.09 | 2.39 | 1.55E-04 | 5.44E-04 |
| 4697 | 7 | F2-3 vs. S2-3 | 257021_at  | AT3G19710 | Belongs to the branched-chain amino acid aminotransferase gene family. Encodes a methionine-oxo-acid transaminase. Involved in the methionine chain elongation pathway that leads to the ultimate biosynthesis of methionine-derived glucosinolates.                                                                                                                                                                                                                                                                                                                                                                                                                                                 | 31.15   | 13.05  | 2.39 | 4.85E-04 | 1.29E-03 |
| 4698 | 7 | F2-3 vs. S2-3 | 245286_at  | AT4G14880 | Encodes a cytosolic isoform of cytosolic O-acetylserine(thiol)lyase, a key enzyme in cysteine biosynthesis and for the fixation of inorganic sulfide. It catalyzes the formation of cysteine from O-acetylserine and inorganic sulfide. Gene expression is predominant in the root cortex and the xylem parenchyma. Gene expression is induced in leave, stems and roots by high salt and heavy metal stresses, mediated by ABA. Lines carrying semi-dominant mutations exhibit early senescence.                                                                                                                                                                                                    | 552.4   | 231.56 | 2.39 | 1.58E-05 | 1.03E-04 |
| 4699 | 7 | F2-3 vs. S2-3 | 252911_at  | AT4G39510 | Required for pollen tube growth and/or fertilization.<br>member of CYP96A<br>Encodes an isoform of UDP-glucuronic acid decarboxylase, which is predicted to be cytosolic by PSORT. This enzyme produces UDP-xylose, which is a substrate for many cell wall carbohydrates including hemicellulose and pectin. UDP-xylose is also known to feedback regulate several cell wall biosynthetic enzymes.                                                                                                                                                                                                                                                                                                  | 88.97   | 37.3   | 2.39 | 2.42E-05 | 1.39E-04 |
| 4700 | 7 | F2-3 vs. S2-3 | 247720_at  | AT5G59290 | Encodes a mitochondrial serine O-acetyltransferase involved in sulfur assimilation and cysteine biosynthesis. Expressed in the vascular system.                                                                                                                                                                                                                                                                                                                                                                                                                                                                                                                                                      | 573.81  | 240.48 | 2.39 | 6.22E-05 | 2.75E-04 |
| 4701 | 7 | F2-3 vs. S2-3 | 257194_at  | AT3G13110 | selenium-binding protein 2;(source:Araport11)                                                                                                                                                                                                                                                                                                                                                                                                                                                                                                                                                                                                                                                        | 133.02  | 55.82  | 2.38 | 7.00E-06 | 5.84E-05 |
| 4702 | 7 | F2-3 vs. S2-3 | 245285_s_a | AT4G14040 |                                                                                                                                                                                                                                                                                                                                                                                                                                                                                                                                                                                                                                                                                                      | 39.05   | 16.44  | 2.38 | 1.60E-04 | 5.56E-04 |
| 4703 | 7 | F2-3 vs. S2-3 | 245292_at  | AT4G15093 | catalytic LigB subunit of aromatic ring-opening dioxygenase family;(source:Araport11)                                                                                                                                                                                                                                                                                                                                                                                                                                                                                                                                                                                                                | 147.83  | 62.03  | 2.38 | 4.20E-06 | 4.10E-05 |
| 4704 | 7 | F2-3 vs. S2-3 | 254462_at  | AT4G20150 | excitatory amino acid transporter;(source:Araport11)                                                                                                                                                                                                                                                                                                                                                                                                                                                                                                                                                                                                                                                 | 401.91  | 169.08 | 2.38 | 2.71E-04 | 8.26E-04 |
| 4705 | 7 | F2-3 vs. S2-3 | 247289_at  | AT5G64290 | dicarboxylate transport 2.1;(source:Araport11)                                                                                                                                                                                                                                                                                                                                                                                                                                                                                                                                                                                                                                                       | 213.29  | 89.45  | 2.38 | 1.03E-05 | 7.67E-05 |
| 4706 | 7 | F2-3 vs. S2-3 | 265244_at  | AT2G43020 | Encodes a polyamine oxidase.                                                                                                                                                                                                                                                                                                                                                                                                                                                                                                                                                                                                                                                                         | 123.61  | 52.11  | 2.37 | 8.04E-05 | 3.33E-04 |
| 4707 | 7 | F2-3 vs. S2-3 | 258181_at  | AT3G21670 | Major facilitator superfamily protein;(source:Araport11)                                                                                                                                                                                                                                                                                                                                                                                                                                                                                                                                                                                                                                             | 52.7    | 22.28  | 2.37 | 2.49E-04 | 7.73E-04 |
| 4708 | 7 | F2-3 vs. S2-3 | 255483_at  | AT4G02500 | Encodes a protein with xylosyltransferase activity, which is specific for UDP-xylose as donor substrate and for oligosaccharides with a degree of polymerization >4. Although the enzyme utilizes either cellopentaose or cellohexaose, its activity is four-fold higher with cellohexaose as an acceptor compared to cellopentaose. The enzyme is able to add several xylosyl residues to the acceptor forming mono-, di- and trixylosylated polysaccharides. The mRNA is cell-to-cell mobile. Encodes a leucine-rich repeat receptor kinase (LRR-RK) involved in the perception of phytosulfokine (PSK), which is a 5-aa tyrosine-sulfated peptide that primarily promotes cellular proliferation. | 558.93  | 236.12 | 2.37 | 1.20E-04 | 4.48E-04 |
| 4709 | 7 | F2-3 vs. S2-3 | 248237_at  | AT5G53890 | Encodes 20S proteasome beta subunit PBE1 (PBE1).                                                                                                                                                                                                                                                                                                                                                                                                                                                                                                                                                                                                                                                     | 34.38   | 14.5   | 2.37 | 1.75E-04 | 5.95E-04 |
| 4710 | 7 | F2-3 vs. S2-3 | 262781_s_a | AT1G13060 | major centromere autoantigen B-like protein;(source:Araport11)                                                                                                                                                                                                                                                                                                                                                                                                                                                                                                                                                                                                                                       | 1411.54 | 597.64 | 2.36 | 4.06E-05 | 2.05E-04 |
| 4711 | 7 | F2-3 vs. S2-3 | 263799_at  | AT2G24550 |                                                                                                                                                                                                                                                                                                                                                                                                                                                                                                                                                                                                                                                                                                      | 36.89   | 15.61  | 2.36 | 7.68E-05 | 3.21E-04 |
| 4712 | 7 | F2-3 vs. S2-3 | 246036_at  | AT5G08370 | Member of Glycoside Hydrolase Family 27 (GH27)that functions as an &#945;-galactosidase.                                                                                                                                                                                                                                                                                                                                                                                                                                                                                                                                                                                                             | 50.94   | 21.58  | 2.36 | 3.59E-04 | 1.03E-03 |
| 4713 | 7 | F2-3 vs. S2-3 | 255380_at  | AT4G03560 | Encodes a depolarization-activated Ca(2+) channel. Anti-sense experiments with this gene as well as Sucrose-H(+) symporters and complementation of yeast sucrose uptake mutant cch1 suggest that this protein mediates a voltage-activated Ca(2+) influx. Mutants lack detectable SV channel activity suggesting TPC1 is essential component of the SV channel. Patch clamp analysis of loss of function mutation indicates TPC1 does not affect Ca2+ signaling in response to abiotic and biotic stress.                                                                                                                                                                                            | 170.61  | 72.66  | 2.35 | 1.54E-05 | 1.01E-04 |
| 4714 | 7 | F2-3 vs. S2-3 | 253567_at  | AT4G31230 | kinase with adenine nucleotide alpha hydrolases-like domain-containing protein;(source:Araport11)                                                                                                                                                                                                                                                                                                                                                                                                                                                                                                                                                                                                    | 26.8    | 11.4   | 2.35 | 3.83E-05 | 1.95E-04 |
| 4715 | 7 | F2-3 vs. S2-3 | 248153_at  | AT5G54250 | member of Cyclic nucleotide gated channel family, downstream component of the signaling pathways leading to HR resistance. mutant plants exhibit gene-for-gene disease resistance against avirulent Pseudomonas syringae despite the near-complete absence of the hypersensitive response (HR). Salicylic acid accumulation in dnd2 mutants is completely PAD4-independent.                                                                                                                                                                                                                                                                                                                          | 67.1    | 28.6   | 2.35 | 6.81E-04 | 1.68E-03 |
| 4716 | 7 | F2-3 vs. S2-3 | 262571_at  | AT1G15430 | hypothetical protein (DUF1644);(source:Araport11)                                                                                                                                                                                                                                                                                                                                                                                                                                                                                                                                                                                                                                                    | 54.92   | 23.45  | 2.34 | 6.01E-05 | 2.69E-04 |

|      |   |               |            |           |                                                                                                                                                                                                                                                                                                                                                                                                                          |         |        |      |          |          |
|------|---|---------------|------------|-----------|--------------------------------------------------------------------------------------------------------------------------------------------------------------------------------------------------------------------------------------------------------------------------------------------------------------------------------------------------------------------------------------------------------------------------|---------|--------|------|----------|----------|
| 4717 | 7 | F2-3 vs. S2-3 | 258500_at  | AT3G02470 | Encodes a S-adenosylmethionine decarboxylase involved in polyamine biosynthesis. Encodes the Vacuolar Sorting Receptor-1 (VSR-1)/Epidermal Growth Factor Receptor-like protein1(VSR-1/ATELP1). Binds vacuolar targeting signals. Involved in sorting seed storage proteins into vacuoles. The mRNA is cell-to-cell mobile.                                                                                               | 361.72  | 154.62 | 2.34 | 1.10E-05 | 8.08E-05 |
| 4718 | 7 | F2-3 vs. S2-3 | 252027_at  | AT3G52850 | member of CYP96A                                                                                                                                                                                                                                                                                                                                                                                                         | 365.81  | 156.61 | 2.34 | 5.88E-05 | 2.65E-04 |
| 4719 | 7 | F2-3 vs. S2-3 | 252896_at  | AT4G39480 | Encodes a protein with putative galacturonosyltransferase activity.                                                                                                                                                                                                                                                                                                                                                      | 40.35   | 17.24  | 2.34 | 1.58E-04 | 5.52E-04 |
| 4720 | 7 | F2-3 vs. S2-3 | 246555_at  | AT5G15470 | Encodes a 2,3-biphosphoglycerate-independent phosphoglycerate mutase that is involved in pollen development and stomatal movement.                                                                                                                                                                                                                                                                                       | 30.94   | 13.2   | 2.34 | 4.41E-05 | 2.17E-04 |
| 4721 | 7 | F2-3 vs. S2-3 | 264668_at  | AT1G09780 | acyl activating enzyme 1;(source:Araport11)                                                                                                                                                                                                                                                                                                                                                                              | 822.02  | 352.15 | 2.33 | 4.16E-05 | 2.08E-04 |
| 4722 | 7 | F2-3 vs. S2-3 | 259545_at  | AT1G20560 |                                                                                                                                                                                                                                                                                                                                                                                                                          | 125.41  | 53.84  | 2.33 | 1.52E-05 | 1.00E-04 |
| 4723 | 7 | F2-3 vs. S2-3 | 262744_at  | AT1G28680 | Catalyses trans-cis isomerization and lactonization in the biosynthesis of coumarins in roots. Encodes a protein with similarity to mammalian RACKs. RACKs function to shuttle activated protein kinase C to different subcellular sites and may also function as a scaffold through physical interactions with other proteins. RACK1B has no phenotype on its own and probably acts redundantly with RACK1A and RACK1C. | 110.43  | 47.3   | 2.33 | 6.01E-05 | 2.69E-04 |
| 4724 | 7 | F2-3 vs. S2-3 | 256144_at  | AT1G48630 | encodes a protein similar to cellulose synthase The mRNA is cell-to-cell mobile.                                                                                                                                                                                                                                                                                                                                         | 527.53  | 226.78 | 2.33 | 9.45E-04 | 2.18E-03 |
| 4725 | 7 | F2-3 vs. S2-3 | 260592_at  | AT1G55850 |                                                                                                                                                                                                                                                                                                                                                                                                                          | 46.82   | 20.05  | 2.33 | 9.55E-05 | 3.77E-04 |
| 4726 | 7 | F2-3 vs. S2-3 | 260284_at  | AT1G80380 | encodes a glycerate kinase which catalyzes the last step of photorespiration C2 cycle.                                                                                                                                                                                                                                                                                                                                   | 118.81  | 51.06  | 2.33 | 3.87E-05 | 1.96E-04 |
| 4727 | 7 | F2-3 vs. S2-3 | 266979_at  | AT2G39470 | PsbP-like protein 2;(source:Araport11)                                                                                                                                                                                                                                                                                                                                                                                   | 61.64   | 26.41  | 2.33 | 8.54E-05 | 3.47E-04 |
| 4728 | 7 | F2-3 vs. S2-3 | 249863_at  | AT5G22950 | SNF7 family protein;(source:Araport11)                                                                                                                                                                                                                                                                                                                                                                                   | 189.82  | 81.62  | 2.33 | 8.40E-06 | 6.65E-05 |
| 4729 | 7 | F2-3 vs. S2-3 | 248375_at  | AT5G51710 | member of Putative potassium proton antiporter family electron transporter, transferring electrons within cytochrome b6/f complex of photosystem II;(source:Araport11)                                                                                                                                                                                                                                                   | 189.01  | 81.13  | 2.33 | 1.25E-05 | 8.72E-05 |
| 4730 | 7 | F2-3 vs. S2-3 | 245000_at  | ATCG00210 |                                                                                                                                                                                                                                                                                                                                                                                                                          | 157.52  | 67.49  | 2.33 | 6.07E-05 | 2.71E-04 |
| 4731 | 7 | F2-3 vs. S2-3 | 260481_at  | AT1G10960 | ferredoxin 1;(source:Araport11)                                                                                                                                                                                                                                                                                                                                                                                          | 1105.15 | 477.21 | 2.32 | 2.98E-04 | 8.88E-04 |
| 4732 | 7 | F2-3 vs. S2-3 | 259603_at  | AT1G56500 | Encodes a thylakoid membrane protein with thioredoxin-like and beta-propeller domains located in the lumen and a haloacid-dehalogenase domain exposed to the chloroplast stroma. The protein Primes role may be to prevent formation of a slowly reversible form of antenna quenching, thereby maintaining the efficiency of light harvesting.The mRNA is cell-to-cell mobile.                                           | 122.66  | 52.83  | 2.32 | 3.41E-05 | 1.79E-04 |
| 4733 | 7 | F2-3 vs. S2-3 | 265763_at  | AT2G48060 | piezo-type mechanosensitive ion channel component;(source:Araport11)                                                                                                                                                                                                                                                                                                                                                     | 265.71  | 114.59 | 2.32 | 4.60E-06 | 4.33E-05 |
| 4734 | 7 | F2-3 vs. S2-3 | 251386_at  | AT3G60800 | Encodes a protein S-acyltransferase that, together with PAT13, cooperatively regulates leaf senescence.                                                                                                                                                                                                                                                                                                                  | 52.88   | 22.79  | 2.32 | 2.44E-04 | 7.58E-04 |
| 4735 | 7 | F2-3 vs. S2-3 | 250254_at  | AT5G13710 | SMT1 controls the level of cholesterol in plants Represents a plastid-encoded subunit of a NAD(P)H dehydrogenase complex. Its mRNA is edited at four positions. Translation data is not available for this gene.                                                                                                                                                                                                         | 1402.73 | 603.56 | 2.32 | 3.77E-05 | 1.93E-04 |
| 4736 | 7 | F2-3 vs. S2-3 | 244962_at  | ATCG01050 |                                                                                                                                                                                                                                                                                                                                                                                                                          | 35.37   | 15.22  | 2.32 | 2.15E-04 | 6.94E-04 |
| 4737 | 7 | F2-3 vs. S2-3 | 264302_at  | AT1G78900 | Encodes catalytic subunit A of the vacuolar ATP synthase. Mutants are devoid of vacuolar ATPase activity as subunit A is encoded only by this gene and show strong defects in male gametophyte development and in Golgi stack morphology. The mRNA is cell-to-cell mobile.                                                                                                                                               | 897.59  | 389.36 | 2.31 | 2.48E-05 | 1.42E-04 |
| 4738 | 7 | F2-3 vs. S2-3 | 258298_at  | AT3G23300 | S-adenosyl-L-methionine-dependent methyltransferases superfamily protein;(source:Araport11)                                                                                                                                                                                                                                                                                                                              | 38.32   | 16.6   | 2.31 | 2.12E-05 | 1.27E-04 |
| 4739 | 7 | F2-3 vs. S2-3 | 254657_s_a | AT4G18220 | Drug/metabolite transporter superfamily protein;(source:Araport11)                                                                                                                                                                                                                                                                                                                                                       | 511.62  | 221.85 | 2.31 | 2.61E-04 | 8.01E-04 |
| 4740 | 7 | F2-3 vs. S2-3 | 254417_at  | AT4G21470 | Bifunctional enzyme that catalyzes hydrolysis of FMN to riboflavin, and phosphorylation of riboflavin to FMN. The mRNA is cell-to-cell mobile.                                                                                                                                                                                                                                                                           | 165.2   | 71.47  | 2.31 | 4.78E-05 | 2.29E-04 |
| 4741 | 7 | F2-3 vs. S2-3 | 253079_s_a | AT4G36190 | Serine carboxypeptidase S28 family protein;(source:Araport11)                                                                                                                                                                                                                                                                                                                                                            | 148.73  | 64.27  | 2.31 | 5.19E-04 | 1.36E-03 |
| 4742 | 7 | F2-3 vs. S2-3 | 248248_at  | AT5G53120 | encodes a novel spermine synthase and is a paralog of previously characterized spermidine synthases, SPDS1 and SPDS2. SPDS3 forms heterodimers with SDPS2, which in turn forms heterodimers with SDPS1 in vivo. The gene does not complement speDelta3 deficiency of spermidine synthase in yeast but DOES complement speDelta4 deficiency.                                                                              | 934.25  | 405.03 | 2.31 | 3.64E-05 | 1.89E-04 |
| 4743 | 7 | F2-3 vs. S2-3 | 248193_at  | AT5G54080 | Encodes a homogentisate 1,2-dioxygenase that can convert homogentisate to malyacetoacetate and is likely to be involved in tyrosine catabolism.                                                                                                                                                                                                                                                                          | 319.08  | 137.97 | 2.31 | 4.04E-04 | 1.12E-03 |
| 4744 | 7 | F2-3 vs. S2-3 | 260288_at  | AT1G80530 | Major facilitator superfamily protein;(source:Araport11)                                                                                                                                                                                                                                                                                                                                                                 | 544.51  | 236.95 | 2.3  | 4.43E-05 | 2.17E-04 |
| 4745 | 7 | F2-3 vs. S2-3 | 256246_at  | AT3G66658 | Encodes a putative aldehyde dehydrogenase. The gene is not responsive to osmotic stress and is expressed constitutively at a low level in plantlets and root cultures.                                                                                                                                                                                                                                                   | 109.72  | 47.68  | 2.3  | 3.02E-05 | 1.63E-04 |

|      |   |               |            |           |                                                                                                                                                                                                                                                                                                                                                                                                                                                                                                                                                                                                                                                                      |         |        |      |          |          |
|------|---|---------------|------------|-----------|----------------------------------------------------------------------------------------------------------------------------------------------------------------------------------------------------------------------------------------------------------------------------------------------------------------------------------------------------------------------------------------------------------------------------------------------------------------------------------------------------------------------------------------------------------------------------------------------------------------------------------------------------------------------|---------|--------|------|----------|----------|
| 4746 | 7 | F2-3 vs. S2-3 | 253994_at  | AT4G26080 | Involved in abscisic acid (ABA) signal transduction. Negative regulator of ABA promotion of stomatal closure.                                                                                                                                                                                                                                                                                                                                                                                                                                                                                                                                                        | 231.31  | 100.6  | 2.3  | 1.21E-05 | 8.58E-05 |
| 4747 | 7 | F2-3 vs. S2-3 | 253200_at  | AT4G34720 | vacuolar H <sup>+</sup> -pumping ATPase 16 kDa proteolipid (ava-p1)                                                                                                                                                                                                                                                                                                                                                                                                                                                                                                                                                                                                  | 1320.05 | 573.7  | 2.3  | 8.42E-05 | 3.43E-04 |
| 4748 | 7 | F2-3 vs. S2-3 | 263704_at  | AT1G31130 | polyadenylate-binding protein 1-B-binding protein;(source:Araport11)                                                                                                                                                                                                                                                                                                                                                                                                                                                                                                                                                                                                 | 118.33  | 51.6   | 2.29 | 9.21E-04 | 2.14E-03 |
| 4749 | 7 | F2-3 vs. S2-3 | 245759_at  | AT1G66900 | alpha/beta-Hydrolases superfamily protein;(source:Araport11)<br>Encodes a trypsin inhibitor involved in modulating programmed cell death in plant-pathogen interactions.                                                                                                                                                                                                                                                                                                                                                                                                                                                                                             | 59.95   | 26.26  | 2.28 | 5.69E-04 | 1.47E-03 |
| 4750 | 7 | F2-3 vs. S2-3 | 260101_at  | AT1G73260 |                                                                                                                                                                                                                                                                                                                                                                                                                                                                                                                                                                                                                                                                      | 47.2    | 20.71  | 2.28 | 2.62E-05 | 1.48E-04 |
| 4751 | 7 | F2-3 vs. S2-3 | 266716_at  | AT2G46820 | Encodes the P subunit of Photosystem I. About 25% of the TMP14 pool appeared to be phosphorylated, and this ratio is not affected by light. Contains seven phosphorylation sites on threonine residue and chloroplast targeting signal. Located in the proximity of PSI-L, -H and -O subunits. Forms oligomers with other members of CURT1 family to modulate grana structure. Encodes phosphatidylinositol-4-phosphate 5-kinase 6 (PIP5K6). Regulates clathrin-dependent endocytosis in pollen tubes.                                                                                                                                                               | 314.98  | 138.39 | 2.28 | 2.42E-05 | 1.39E-04 |
| 4752 | 7 | F2-3 vs. S2-3 | 258690_at  | AT3G07960 | Member of Receptor kinase-like protein family. Controls the separation step of floral organ abscission. The mRNA is cell-to-cell mobile.                                                                                                                                                                                                                                                                                                                                                                                                                                                                                                                             | 46.13   | 20.19  | 2.28 | 1.63E-04 | 5.64E-04 |
| 4753 | 7 | F2-3 vs. S2-3 | 253779_at  | AT4G28490 | Haloacid dehalogenase-like hydrolase (HAD) superfamily protein;(source:Araport11)                                                                                                                                                                                                                                                                                                                                                                                                                                                                                                                                                                                    | 24.81   | 10.89  | 2.28 | 1.23E-05 | 8.61E-05 |
| 4754 | 7 | F2-3 vs. S2-3 | 265680_at  | AT2G32150 | RING/U-box superfamily protein;(source:Araport11)                                                                                                                                                                                                                                                                                                                                                                                                                                                                                                                                                                                                                    | 82.07   | 36.17  | 2.27 | 4.08E-04 | 1.13E-03 |
| 4755 | 7 | F2-3 vs. S2-3 | 251086_at  | AT5G01450 | Co-chaperonin similar to E. coli DnaJ                                                                                                                                                                                                                                                                                                                                                                                                                                                                                                                                                                                                                                | 86.37   | 38.11  | 2.27 | 3.61E-04 | 1.03E-03 |
| 4756 | 7 | F2-3 vs. S2-3 | 245686_at  | AT5G22060 | pectin methylesterase PCR fragment F;(source:Araport11)                                                                                                                                                                                                                                                                                                                                                                                                                                                                                                                                                                                                              | 580.64  | 256.22 | 2.27 | 3.84E-05 | 1.95E-04 |
| 4757 | 7 | F2-3 vs. S2-3 | 248263_at  | AT5G53370 | Arabidopsis thaliana ribulose-5-phosphate-3-epimerase mRNA                                                                                                                                                                                                                                                                                                                                                                                                                                                                                                                                                                                                           | 50.09   | 22.04  | 2.27 | 4.57E-05 | 2.22E-04 |
| 4758 | 7 | F2-3 vs. S2-3 | 247523_at  | AT5G61410 | Eukaryotic aspartyl protease family protein;(source:Araport11)                                                                                                                                                                                                                                                                                                                                                                                                                                                                                                                                                                                                       | 330.79  | 145.74 | 2.27 | 1.22E-05 | 8.58E-05 |
| 4759 | 7 | F2-3 vs. S2-3 | 264365_s_a | AT1G03230 |                                                                                                                                                                                                                                                                                                                                                                                                                                                                                                                                                                                                                                                                      | 102.74  | 45.56  | 2.26 | 6.46E-05 | 2.82E-04 |
| 4760 | 7 | F2-3 vs. S2-3 | 261651_at  | AT1G27760 | Encodes a protein with similarity to human interferon-related developmental regulator (IFRD)that is involved in salt tolerance. Loss of function mutations are hypersensitive to salt stress and have reduced fertility. SAT32 is found in the cytoplasm but appears to translocate to the nucleus when plants are subject to salt stress.<br>A member of ARF GTPase family. A thaliana has 21 members of this family, known to be essential for vesicle coating and uncoating and functions in GTP-binding. Gene encoding ADP-ribosylation factor and similar to ADP-ribosylation factor (GI:861205) (Chlamydomonas reinhardtii), other ARFs and ARF-like proteins. | 75.36   | 33.35  | 2.26 | 7.47E-04 | 1.80E-03 |
| 4761 | 7 | F2-3 vs. S2-3 | 263297_at  | AT2G15310 | FAM210B-like protein, putative (DUF1279);(source:Araport11)                                                                                                                                                                                                                                                                                                                                                                                                                                                                                                                                                                                                          | 29.65   | 13.15  | 2.26 | 1.03E-04 | 4.01E-04 |
| 4762 | 7 | F2-3 vs. S2-3 | 265628_at  | AT2G27290 | tubulin 9 The mRNA is cell-to-cell mobile.                                                                                                                                                                                                                                                                                                                                                                                                                                                                                                                                                                                                                           | 72.11   | 31.85  | 2.26 | 5.70E-04 | 1.47E-03 |
| 4763 | 7 | F2-3 vs. S2-3 | 254446_at  | AT4G20890 | dihydrofolate reductase;(source:Araport11)                                                                                                                                                                                                                                                                                                                                                                                                                                                                                                                                                                                                                           | 268.97  | 119    | 2.26 | 1.00E-05 | 7.51E-05 |
| 4764 | 7 | F2-3 vs. S2-3 | 254158_at  | AT4G24380 | HAD superfamily, subfamily IIIB acid phosphatase;(source:Araport11)                                                                                                                                                                                                                                                                                                                                                                                                                                                                                                                                                                                                  | 133.31  | 58.96  | 2.26 | 2.37E-05 | 1.37E-04 |
| 4765 | 7 | F2-3 vs. S2-3 | 254096_at  | AT4G25150 | serine/arginine repetitive matrix-like protein;(source:Araport11)                                                                                                                                                                                                                                                                                                                                                                                                                                                                                                                                                                                                    | 32.07   | 14.2   | 2.26 | 1.17E-05 | 8.37E-05 |
| 4766 | 7 | F2-3 vs. S2-3 | 253455_at  | AT4G32020 |                                                                                                                                                                                                                                                                                                                                                                                                                                                                                                                                                                                                                                                                      | 82      | 36.34  | 2.26 | 4.63E-04 | 1.24E-03 |
| 4767 | 7 | F2-3 vs. S2-3 | 250034_at  | AT5G18280 | Encodes an enzyme with ATPase and ADPase activity (an apyrase) that when mutated in combination with ATAPY1 causes a complete inhibition of pollen germination.                                                                                                                                                                                                                                                                                                                                                                                                                                                                                                      | 95.79   | 42.44  | 2.26 | 1.35E-05 | 9.22E-05 |
| 4768 | 7 | F2-3 vs. S2-3 | 249025_at  | AT5G44720 | Molybdenum cofactor sulfurase family protein;(source:Araport11)                                                                                                                                                                                                                                                                                                                                                                                                                                                                                                                                                                                                      | 242.3   | 107.32 | 2.26 | 9.43E-05 | 3.75E-04 |
| 4769 | 7 | F2-3 vs. S2-3 | 248804_at  | AT5G47470 | nodulin MtN21-like transporter family protein                                                                                                                                                                                                                                                                                                                                                                                                                                                                                                                                                                                                                        | 49.08   | 21.71  | 2.26 | 7.34E-04 | 1.78E-03 |
| 4770 | 7 | F2-3 vs. S2-3 | 248276_at  | AT5G53550 | YELLOW STRIPE like 3;(source:Araport11)                                                                                                                                                                                                                                                                                                                                                                                                                                                                                                                                                                                                                              | 36.02   | 15.94  | 2.26 | 2.24E-05 | 1.31E-04 |
| 4771 | 7 | F2-3 vs. S2-3 | 248104_at  | AT5G55250 | Encodes an enzyme which specifically converts IAA to its methyl ester form MeIAA. This gene belongs to the family of carboxyl methyltransferases whose members catalyze the transfer of the methyl group from S-adenosyl-L-methionine to carboxylic acid-containing substrates to form small molecule methyl esters. Expression of TCP genes is downregulated in mutant iamt1-D. SABATH methyltransferase.                                                                                                                                                                                                                                                           | 79.53   | 35.2   | 2.26 | 9.62E-05 | 3.79E-04 |
| 4772 | 7 | F2-3 vs. S2-3 | 263921_at  | AT2G36460 | Aldolase superfamily protein;(source:Araport11)                                                                                                                                                                                                                                                                                                                                                                                                                                                                                                                                                                                                                      | 169.3   | 75.26  | 2.25 | 1.03E-04 | 4.00E-04 |
| 4773 | 7 | F2-3 vs. S2-3 | 259105_at  | AT3G05500 | Encodes a protein that associates with lipid droplet surfaces and shares sequence homology with family of small rubber particle proteins. Plays dual roles as positive factors for tissue growth and development and in drought stress responses. The mRNA is cell-to-cell mobile.                                                                                                                                                                                                                                                                                                                                                                                   | 268.08  | 119.13 | 2.25 | 6.93E-04 | 1.70E-03 |
| 4774 | 7 | F2-3 vs. S2-3 | 257082_at  | AT3G20580 | COBRA-like protein 10 precursor;(source:Araport11)<br>Encodes an unusual palmitate desaturase that is highly substrate specific. It introduces a delta-3 trans double bond at palmitate at the sn-2 position of phosphatidylglycerol. The mRNA is cell-to-cell mobile.                                                                                                                                                                                                                                                                                                                                                                                               | 24.29   | 10.81  | 2.25 | 1.25E-04 | 4.61E-04 |
| 4775 | 7 | F2-3 vs. S2-3 | 253943_at  | AT4G27030 |                                                                                                                                                                                                                                                                                                                                                                                                                                                                                                                                                                                                                                                                      | 33.03   | 14.7   | 2.25 | 1.59E-04 | 5.56E-04 |

|      |   |               |             |           |                                                                                                                                                                                                                                                                                                                                                                                                                |         |         |      |          |          |
|------|---|---------------|-------------|-----------|----------------------------------------------------------------------------------------------------------------------------------------------------------------------------------------------------------------------------------------------------------------------------------------------------------------------------------------------------------------------------------------------------------------|---------|---------|------|----------|----------|
| 4776 | 7 | F2-3 vs. S2-3 | 248983_at   | AT5G45130 | small GTP binding protein. The mRNA is cell-to-cell mobile.                                                                                                                                                                                                                                                                                                                                                    | 2583.06 | 1145.93 | 2.25 | 7.10E-06 | 5.88E-05 |
| 4777 | 7 | F2-3 vs. S2-3 | 248796_at   | AT5G47180 | Plant VAMP (vesicle-associated membrane protein) family protein;(source:Araport11)                                                                                                                                                                                                                                                                                                                             | 77.23   | 34.28   | 2.25 | 1.45E-05 | 9.72E-05 |
| 4778 | 7 | F2-3 vs. S2-3 | 261191_at   | AT1G32900 | UDP-Glycosyltransferase superfamily protein;(source:Araport11)                                                                                                                                                                                                                                                                                                                                                 | 1382.61 | 616.58  | 2.24 | 2.80E-04 | 8.45E-04 |
| 4779 | 7 | F2-3 vs. S2-3 | 245731_at   | AT1G73500 | member of MAP Kinase Kinase family. Autophosphorylates and also phosphorylates MPK3 and MPK6. Independently involved in ethylene and calmalexin biosynthesis. Induces transcription of ACS2, ACS6, ERF1, ERF2, ERF5, ERF6, CYP79B2, CYP79B3, CYP71A13 and PAD3. Belongs to a member of the RNA-binding glycine-rich (RBG) gene superfamily. The mRNA is cell-to-cell mobile.                                   | 126.09  | 56.24   | 2.24 | 4.45E-05 | 2.18E-04 |
| 4780 | 7 | F2-3 vs. S2-3 | 255834_at   | AT2G33410 | Sugar isomerase (SIS) family protein;(source:Araport11)                                                                                                                                                                                                                                                                                                                                                        | 537.55  | 240.01  | 2.24 | 4.31E-05 | 2.13E-04 |
| 4781 | 7 | F2-3 vs. S2-3 | 251855_at   | AT3G54690 | Aldolase-type TIM barrel family protein;(source:Araport11)                                                                                                                                                                                                                                                                                                                                                     | 295.1   | 131.62  | 2.24 | 1.75E-05 | 1.10E-04 |
| 4782 | 7 | F2-3 vs. S2-3 | 247283_at   | AT5G64250 | Encodes RNA-dependent RNA polymerase. While not required for virus-induced post-transcriptional gene silencing (PTGS), it can promote turnover of viral RNAs in infected plants. Nomenclature according to Xie, et al. (2004). Involved in the production of Cucumber Mosaic Virus siRNAs.                                                                                                                     | 119.53  | 53.43   | 2.24 | 1.39E-05 | 9.43E-05 |
| 4783 | 7 | F2-3 vs. S2-3 | 262888_at   | AT1G14790 | Encodes S-adenosyl-methionine-sterol-C-methyltransferase, an enzyme in the sterol biosynthetic pathway.                                                                                                                                                                                                                                                                                                        | 126.82  | 56.94   | 2.23 | 1.19E-04 | 4.44E-04 |
| 4784 | 7 | F2-3 vs. S2-3 | 261727_at   | AT1G76090 | RGP1 is a UDP-arabinose mutase that catalyzes the interconversion between the pyranose and furanose forms of UDP-L-arabinose. It appears to be required for proper cell wall formation. rgp1/rgp2 (at5g15650) double mutants have a male gametophyte lethal phenotype. RGP1 fusion proteins can be found in the cytosol and peripherally associated with the Golgi apparatus. The mRNA is cell-to-cell mobile. | 57.66   | 25.83   | 2.23 | 2.20E-05 | 1.30E-04 |
| 4785 | 7 | F2-3 vs. S2-3 | 259077_s_at | AT3G02230 | A member of ARF GTPase family. A thaliana has 21 members of this family, known to be essential for vesicle coating and uncoating and functions in GTP-binding. Gene encoding ADP-ribosylation factor and similar to ADP-ribosylation factor GB:P91924 (Dugesia japonica), other ARFs and ARF-like proteins.                                                                                                    | 4734.64 | 2126.31 | 2.23 | 5.40E-04 | 1.41E-03 |
| 4786 | 7 | F2-3 vs. S2-3 | 256838_at   | AT3G22950 | CYP94B3 is a jasmonoyl-isoleucine-12-hydroxylase that catalyzes the formation of 12-OH-JA-Ile from JA-Ile. By reducing the levels of this the biologically active phytohormone, CYP94B3 attenuates the jasmonic acid signaling cascade. CYP94B3 transcript levels rise in response to wounding.                                                                                                                | 91.4    | 40.91   | 2.23 | 9.46E-05 | 3.75E-04 |
| 4787 | 7 | F2-3 vs. S2-3 | 252368_at   | AT3G48520 | Cytosol aminopeptidase family protein;(source:Araport11)                                                                                                                                                                                                                                                                                                                                                       | 96.98   | 43.41   | 2.23 | 6.61E-04 | 1.64E-03 |
| 4788 | 7 | F2-3 vs. S2-3 | 253602_s_at | AT4G30910 | Encodes a protein that appears to have 1-amino-cyclopropane-1-carboxylic acid oxidase activity based on mutant analyses. The mRNA is cell-to-cell mobile.                                                                                                                                                                                                                                                      | 167.06  | 74.8    | 2.23 | 3.90E-04 | 1.09E-03 |
| 4789 | 7 | F2-3 vs. S2-3 | 253274_at   | AT4G34200 | Encodes a 3-phosphoglycerate dehydrogenase that is essential for embryo and pollen development.                                                                                                                                                                                                                                                                                                                | 159.2   | 71.3    | 2.23 | 2.20E-04 | 7.06E-04 |
| 4790 | 7 | F2-3 vs. S2-3 | 246429_at   | AT5G17450 | Heavy metal transport/detoxification superfamily protein;(source:Araport11)                                                                                                                                                                                                                                                                                                                                    | 28.2    | 12.64   | 2.23 | 3.09E-05 | 1.66E-04 |
| 4791 | 7 | F2-3 vs. S2-3 | 247586_at   | AT5G60660 | A member of the plasma membrane intrinsic protein subfamily PIP2. When expressed in yeast cells can conduct hydrogen peroxide into those cells. Mutants exhibit longer root hairs.                                                                                                                                                                                                                             | 100.07  | 44.94   | 2.23 | 6.22E-05 | 2.75E-04 |
| 4792 | 7 | F2-3 vs. S2-3 | 247545_at   | AT5G61530 | small G protein family protein / RhoGAP family protein;(source:Araport11)                                                                                                                                                                                                                                                                                                                                      | 223.57  | 100.47  | 2.23 | 2.87E-05 | 1.57E-04 |
| 4793 | 7 | F2-3 vs. S2-3 | 264346_at   | AT1G12010 | Encodes a protein that appears to have 1-amino-cyclopropane-1-carboxylic acid oxidase activity based on mutant analyses. The mRNA is cell-to-cell mobile.                                                                                                                                                                                                                                                      | 81.77   | 36.85   | 2.22 | 8.47E-04 | 1.99E-03 |
| 4794 | 7 | F2-3 vs. S2-3 | 258251_at   | AT3G15810 | LURP-one-like protein (DUF567);(source:Araport11)                                                                                                                                                                                                                                                                                                                                                              | 87.12   | 39.33   | 2.22 | 1.99E-04 | 6.57E-04 |
| 4795 | 7 | F2-3 vs. S2-3 | 245352_at   | AT4G15490 | Encodes a protein that might have sinapic acid:UDP-glucose glucosyltransferase activity.                                                                                                                                                                                                                                                                                                                       | 47.1    | 21.22   | 2.22 | 1.13E-05 | 8.27E-05 |
| 4796 | 7 | F2-3 vs. S2-3 | 253360_at   | AT4G33090 | encodes an aminopeptidase, a ortholog of mouse microsomal AP (EC 3.4.11.2).                                                                                                                                                                                                                                                                                                                                    | 661.59  | 298.25  | 2.22 | 2.44E-04 | 7.58E-04 |
| 4797 | 7 | F2-3 vs. S2-3 | 247693_at   | AT5G59730 | A member of EXO70 gene family, putative exocyst subunits, conserved in land plants. Arabidopsis thaliana contains 23 putative EXO70 genes, which can be classified into eight clusters on the phylogenetic tree. The mRNA is cell-to-cell mobile.                                                                                                                                                              | 100.88  | 45.36   | 2.22 | 9.20E-04 | 2.14E-03 |
| 4798 | 7 | F2-3 vs. S2-3 | 247539_at   | AT5G61710 | cotton fiber protein;(source:Araport11)                                                                                                                                                                                                                                                                                                                                                                        | 28.92   | 13.03   | 2.22 | 3.79E-04 | 1.07E-03 |
| 4799 | 7 | F2-3 vs. S2-3 | 260214_at   | AT1G74510 | Galactose oxidase/kelch repeat superfamily protein;(source:Araport11)                                                                                                                                                                                                                                                                                                                                          | 87.34   | 39.58   | 2.21 | 8.45E-05 | 3.44E-04 |
| 4800 | 7 | F2-3 vs. S2-3 | 251397_at   | AT3G60570 | member of BETA-EXPANSINS. Naming convention from the Expansin Working Group (Kende et al, 2004. Plant Mol Bio)                                                                                                                                                                                                                                                                                                 | 69.15   | 31.29   | 2.21 | 1.25E-04 | 4.62E-04 |
| 4801 | 7 | F2-3 vs. S2-3 | 251127_at   | AT5G01080 | Beta-galactosidase related protein;(source:Araport11)                                                                                                                                                                                                                                                                                                                                                          | 36.36   | 16.44   | 2.21 | 4.84E-04 | 1.29E-03 |
| 4802 | 7 | F2-3 vs. S2-3 | 260777_at   | AT1G14560 | Encodes a mitochondrial CoA transporter.                                                                                                                                                                                                                                                                                                                                                                       | 79.59   | 36.12   | 2.2  | 4.84E-05 | 2.31E-04 |
| 4803 | 7 | F2-3 vs. S2-3 | 265190_at   | AT1G23780 | F-box family protein;(source:Araport11)                                                                                                                                                                                                                                                                                                                                                                        | 57.66   | 26.22   | 2.2  | 5.25E-04 | 1.38E-03 |

|      |   |               |           |           |                                                                                                                                                                                                                                                                                                                                                                                                                                                                                                                                                                                            |         |        |      |          |          |
|------|---|---------------|-----------|-----------|--------------------------------------------------------------------------------------------------------------------------------------------------------------------------------------------------------------------------------------------------------------------------------------------------------------------------------------------------------------------------------------------------------------------------------------------------------------------------------------------------------------------------------------------------------------------------------------------|---------|--------|------|----------|----------|
| 4804 | 7 | F2-3 vs. S2-3 | 262175_at | AT1G74880 | Encodes subunit NDH-O of NAD(P)H:plastoquinone dehydrogenase complex (Ndh complex) present in the thylakoid membrane of chloroplasts. This subunit is thought to be required for Ndh complex assembly.                                                                                                                                                                                                                                                                                                                                                                                     | 37.62   | 17.12  | 2.2  | 4.56E-04 | 1.23E-03 |
| 4805 | 7 | F2-3 vs. S2-3 | 245391_at | AT4G16520 | Autophagy protein.                                                                                                                                                                                                                                                                                                                                                                                                                                                                                                                                                                         | 1720.01 | 781.24 | 2.2  | 1.05E-04 | 4.05E-04 |
| 4806 | 7 | F2-3 vs. S2-3 | 252933_at | AT4G39110 | bups1 and bups1/2 double mutants have reduced fertility due to premature rupture of pollen tubes before they reach the ovule. BUSP1 interacts with RALF4/19 peptide ligands and ANX1/2 receptors. BUPS/ANX signaling may regulate and promote pollen tube growth.                                                                                                                                                                                                                                                                                                                          | 29.02   | 13.21  | 2.2  | 2.11E-04 | 6.86E-04 |
| 4807 | 7 | F2-3 vs. S2-3 | 250929_at | AT5G03290 | Encodes a catalytic subunit of the mitochondrially-localized NAD+- dependent isocitrate dehydrogenase. The mRNA is cell-to-cell mobile.                                                                                                                                                                                                                                                                                                                                                                                                                                                    | 1590.54 | 721.78 | 2.2  | 4.44E-05 | 2.17E-04 |
| 4808 | 7 | F2-3 vs. S2-3 | 246958_at | AT5G24690 | plant/protein, putative (DUF3411);(source:Araport11)                                                                                                                                                                                                                                                                                                                                                                                                                                                                                                                                       | 451.86  | 205.27 | 2.2  | 2.04E-04 | 6.71E-04 |
| 4809 | 7 | F2-3 vs. S2-3 | 246755_at | AT5G27920 | F-box family protein;(source:Araport11)                                                                                                                                                                                                                                                                                                                                                                                                                                                                                                                                                    | 164.08  | 74.7   | 2.2  | 9.50E-06 | 7.29E-05 |
| 4810 | 7 | F2-3 vs. S2-3 | 261788_at | AT1G15980 | encodes a novel subunit of the chloroplast NAD(P)H dehydrogenase complex, involved in cyclic electron flow around photosystem I to produce ATP.                                                                                                                                                                                                                                                                                                                                                                                                                                            | 48.46   | 22.18  | 2.19 | 3.04E-04 | 9.04E-04 |
| 4811 | 7 | F2-3 vs. S2-3 | 264931_at | AT1G60590 | Pectin lyase-like superfamily protein;(source:Araport11)                                                                                                                                                                                                                                                                                                                                                                                                                                                                                                                                   | 46.12   | 21.02  | 2.19 | 2.38E-04 | 7.46E-04 |
| 4812 | 7 | F2-3 vs. S2-3 | 258085_at | AT3G26100 | Regulator of chromosome condensation (RCC1) family protein;(source:Araport11)                                                                                                                                                                                                                                                                                                                                                                                                                                                                                                              | 77.84   | 35.51  | 2.19 | 1.39E-04 | 4.98E-04 |
| 4813 | 7 | F2-3 vs. S2-3 | 257150_at | AT3G27230 | S-adenosyl-L-methionine-dependent methyltransferases superfamily protein;(source:Araport11)                                                                                                                                                                                                                                                                                                                                                                                                                                                                                                | 122.9   | 56.1   | 2.19 | 6.64E-05 | 2.87E-04 |
| 4814 | 7 | F2-3 vs. S2-3 | 256598_at | AT3G30180 | Encodes a cytochrome p450 enzyme that catalyzes the last reaction in the production of brassinolide. It is capable of converting 6-deoxocastasterone into castasterone, a C-6 oxidation, as well as the further conversion of castasterone into brassinolide by a Baeyer-Villinger oxidation reaction at C-6, resulting in the formation of an unusual seven-membered lactone ring. The enzyme possesses high affinity for both C28- and C27-Brassinosteroids. The expression of the gene using a CYP85A2 promoter:LUC fusion construct was shown to be under circadian and light control. | 44.12   | 20.17  | 2.19 | 3.50E-04 | 1.01E-03 |
| 4815 | 7 | F2-3 vs. S2-3 | 252099_at | AT3G51250 | Senescence/dehydration-associated protein-like protein;(source:Araport11)                                                                                                                                                                                                                                                                                                                                                                                                                                                                                                                  | 192.2   | 87.61  | 2.19 | 2.10E-05 | 1.26E-04 |
| 4816 | 7 | F2-3 vs. S2-3 | 251084_at | AT5G01520 | Encodes a cytosolic RING-type E3 ubiquitin (Ub) ligase that is critical for ABA and high salinity responses during germination. AtAIRP2 and SDIR1 likely play a combinatory role in ABA signaling and the response to high salt in Arabidopsis.                                                                                                                                                                                                                                                                                                                                            | 30.95   | 14.12  | 2.19 | 9.20E-06 | 7.13E-05 |
| 4817 | 7 | F2-3 vs. S2-3 | 248560_at | AT5G49970 | encodes the bifunctional pyridoxine (pyridoxamine) 5'-phosphate oxidase (PPOX)(EC 1.4.3.5) that is involved in the formation of pyridoxal 5'-phosphate (member of the vitamin B6 group). NAD(P)HX epimerase (AT5G49970) interconverts the two epimers of NAD(P)HX.                                                                                                                                                                                                                                                                                                                         | 172.21  | 78.75  | 2.19 | 1.25E-04 | 4.63E-04 |
| 4818 | 7 | F2-3 vs. S2-3 | 264856_at | AT2G17370 | Encodes a 3-hydroxy-3-methylglutaryl-CoA reductase (HMGR) that is involved in the synthesis of sterol and triterpenoid compounds.                                                                                                                                                                                                                                                                                                                                                                                                                                                          | 35.87   | 16.43  | 2.18 | 5.07E-05 | 2.40E-04 |
| 4819 | 7 | F2-3 vs. S2-3 | 245101_at | AT2G40890 | encodes coumarate 3-hydroxylase (C3H), a P450-dependent monooxygenase. Involved in lignin biosynthesis and flavonoid biosynthesis. Also affects the biosynthesis of coumarins such as scopoletin and scopolin as a branching-out-pathway from the phenylpropanoid acid level.                                                                                                                                                                                                                                                                                                              | 259.6   | 119.21 | 2.18 | 8.00E-04 | 1.90E-03 |
| 4820 | 7 | F2-3 vs. S2-3 | 258830_at | AT3G07090 | PPPDE putative thiol peptidase family protein;(source:Araport11)                                                                                                                                                                                                                                                                                                                                                                                                                                                                                                                           | 85.15   | 39.12  | 2.18 | 4.60E-04 | 1.24E-03 |
| 4821 | 7 | F2-3 vs. S2-3 | 247488_at | AT5G61820 | stress up-regulated Nod 19 protein;(source:Araport11)                                                                                                                                                                                                                                                                                                                                                                                                                                                                                                                                      | 89.75   | 41.21  | 2.18 | 2.29E-04 | 7.27E-04 |
| 4822 | 7 | F2-3 vs. S2-3 | 264146_at | AT1G02205 | Expression of the CER1 gene associated with production of stem epicuticular wax and pollen fertility. Biochemical studies showed that cer1 mutants are blocked in the conversion of stem wax C30 aldehydes to C29 alkanes, and they also lack the secondary alcohols and ketones. These suggested the CER1 protein is an aldehyde decarbonylase, but the exact molecular function of this protein remains to be determined.                                                                                                                                                                | 297.36  | 136.78 | 2.17 | 2.29E-04 | 7.27E-04 |
| 4823 | 7 | F2-3 vs. S2-3 | 261420_at | AT1G07720 | Encodes KCS3, a member of the 3-ketoacyl-CoA synthase family involved in the biosynthesis of VLCFA (very long chain fatty acids).                                                                                                                                                                                                                                                                                                                                                                                                                                                          | 22.72   | 10.49  | 2.17 | 1.71E-05 | 1.09E-04 |
| 4824 | 7 | F2-3 vs. S2-3 | 261722_at | AT1G08510 | Encodes an acyl-acyl carrier protein thioesterase. Hydrolyzes primarily saturated acyl-ACPs with chain lengths that vary between 8 and 18 carbons. Involved in saturated fatty acid synthesis.                                                                                                                                                                                                                                                                                                                                                                                             | 321.83  | 148.21 | 2.17 | 2.90E-05 | 1.58E-04 |
| 4825 | 7 | F2-3 vs. S2-3 | 260517_at | AT1G51420 | Nuclear-encoded, plastid-targeted globular protein that is functional as dimer. sucrose-phosphatase 1;(source:Araport11)                                                                                                                                                                                                                                                                                                                                                                                                                                                                   | 50.31   | 23.2   | 2.17 | 2.91E-04 | 8.73E-04 |
| 4826 | 7 | F2-3 vs. S2-3 | 258774_at | AT3G10740 | Encodes a bifunctional alpha-L-arabinofuranosidase/beta-D-xylosidase that belongs to family 51 of glycoside hydrolases. It may be involved in cell wall modification.                                                                                                                                                                                                                                                                                                                                                                                                                      | 35.76   | 16.46  | 2.17 | 4.33E-04 | 1.18E-03 |

|      |   |               |           |           |                                                                                                                                                                                                                                                                                                                                                                                                                                                                                                                                                                                                                  |        |        |      |          |          |
|------|---|---------------|-----------|-----------|------------------------------------------------------------------------------------------------------------------------------------------------------------------------------------------------------------------------------------------------------------------------------------------------------------------------------------------------------------------------------------------------------------------------------------------------------------------------------------------------------------------------------------------------------------------------------------------------------------------|--------|--------|------|----------|----------|
| 4827 | 7 | F2-3 vs. S2-3 | 253374_at | AT4G33140 | Haloacid dehalogenase-like hydrolase (HAD) superfamily protein;(source:Araport11)                                                                                                                                                                                                                                                                                                                                                                                                                                                                                                                                | 73.64  | 33.96  | 2.17 | 1.14E-05 | 8.32E-05 |
| 4828 | 7 | F2-3 vs. S2-3 | 250404_at | AT5G10960 | Polynucleotidyl transferase, ribonuclease H-like superfamily protein;(source:Araport11)                                                                                                                                                                                                                                                                                                                                                                                                                                                                                                                          | 58.13  | 26.78  | 2.17 | 9.09E-05 | 3.64E-04 |
| 4829 | 7 | F2-3 vs. S2-3 | 245979_at | AT5G13150 | A member of EXO70 gene family, putative exocyst subunits, conserved in land plants. Arabidopsis thaliana contains 23 putative EXO70 genes, which can be classified into eight clusters on the phylogenetic tree. This particular member is expressed in pollen and, together with EXO70C2, is involved in pollen tube elongation. Found in the cytoplasm and surprisingly, not found in the plasma membrane.                                                                                                                                                                                                     | 28.55  | 13.16  | 2.17 | 5.26E-04 | 1.38E-03 |
| 4830 | 7 | F2-3 vs. S2-3 | 263760_at | AT2G21280 | A nuclear-encoded, plastid-targeted protein (AtSulA) whose overexpression causes severe yet stochastic plastid (shown in chloroplasts and leucoplasts) division defects. The protein does not appear to interact with either AtFtsZ proteins when studied in a yeast two-hybrid system. Major enzyme responsible for the synthesis of 18:2 fatty acids in the endoplasmic reticulum. Contains His-rich motifs, which contribute to the interaction with the electron donor cytochrome b5. Mutations in this gene suppress the low temperature-induced phenotype of Arabidopsis tocopherol-deficient mutant vte2. | 100.38 | 46.42  | 2.16 | 2.15E-04 | 6.94E-04 |
| 4831 | 7 | F2-3 vs. S2-3 | 256277_at | AT3G12120 | B-S glucosidase 44;(source:Araport11)                                                                                                                                                                                                                                                                                                                                                                                                                                                                                                                                                                            | 363.61 | 168.39 | 2.16 | 2.04E-04 | 6.71E-04 |
| 4832 | 7 | F2-3 vs. S2-3 | 258151_at | AT3G18080 |                                                                                                                                                                                                                                                                                                                                                                                                                                                                                                                                                                                                                  | 64.69  | 29.88  | 2.16 | 1.44E-05 | 9.67E-05 |
| 4833 | 7 | F2-3 vs. S2-3 | 261623_at | AT1G01980 | Encodes an oligogalacturonide oxidase that inactivates the elicitor-active oligogalacturonides (OGs).<br><br>Encodes a chloroplast localized protein with similarity to translation initiation factor 2. Can complement loss of INFB in E.coli suggesting FUG1 does function as a translation initiation factor in vivo. Identified as a suppressor of the leaf variegation mutant var2-6. Suppression is only seen in hypomorphs as complete loss of function alleles are embryo lethal. The mRNA is cell-to-cell mobile.                                                                                       | 30.02  | 13.94  | 2.15 | 1.31E-04 | 4.79E-04 |
| 4834 | 7 | F2-3 vs. S2-3 | 262483_at | AT1G17220 | Encodes a arginine decarboxylase (ADC), a rate-limiting enzyme that catalyzes the first step of polyamine (PA) biosynthesis via ADC pathway in Arabidopsis thaliana. Arabidopsis genome has two ADC paralogs, ADC1 and ADC2. ADC2 is stress-inducible (osmotic stress). Double mutant analysis showed that ADC genes are essential for the production of PA, and are required for normal seed development. Overexpression causes phenotypes similar to GA-deficient plants and these plants show reduced levels of GA due to lower expression levels of AtGA20ox1, AtGA3ox3 and AtGA3ox1.                        | 547.53 | 254.12 | 2.15 | 1.66E-05 | 1.06E-04 |
| 4835 | 7 | F2-3 vs. S2-3 | 253203_at | AT4G34710 | histone-lysine N-methyltransferase trithorax-like protein;(source:Araport11)                                                                                                                                                                                                                                                                                                                                                                                                                                                                                                                                     | 554.78 | 258.38 | 2.15 | 3.23E-04 | 9.45E-04 |
| 4836 | 7 | F2-3 vs. S2-3 | 249377_at | AT5G40690 | dicarboxylate transporter 2.2;(source:Araport11)                                                                                                                                                                                                                                                                                                                                                                                                                                                                                                                                                                 | 28.61  | 13.32  | 2.15 | 5.25E-05 | 2.46E-04 |
| 4837 | 7 | F2-3 vs. S2-3 | 247286_at | AT5G64280 | member of Alpha-Expansin Gene Family. Naming convention from the Expansin Working Group (Kende et al, 2004. Plant Mol Bio)                                                                                                                                                                                                                                                                                                                                                                                                                                                                                       | 80.43  | 37.48  | 2.15 | 2.44E-04 | 7.59E-04 |
| 4838 | 7 | F2-3 vs. S2-3 | 261226_at | AT1G20190 | Encodes a mitochondrial-localized CMP-KDO (3-deoxy-D-manno-octulosonate) synthetase. This is the enzyme activating KDO as a nucleotide sugar prior to its incorporation into rhamnogalacturonan-II. Heterozygous mutants are defective in pollen development and in pollen tube elongation.                                                                                                                                                                                                                                                                                                                      | 34.63  | 16.16  | 2.14 | 8.17E-04 | 1.94E-03 |
| 4839 | 7 | F2-3 vs. S2-3 | 261373_at | AT1G53000 | thylakoid lumenal protein (Mog1/PsbP/DUF1795-like photosystem II reaction center PsbP family protein);(source:Araport11)                                                                                                                                                                                                                                                                                                                                                                                                                                                                                         | 102.85 | 48.03  | 2.14 | 7.00E-04 | 1.72E-03 |
| 4840 | 7 | F2-3 vs. S2-3 | 264959_at | AT1G77090 |                                                                                                                                                                                                                                                                                                                                                                                                                                                                                                                                                                                                                  | 102.64 | 47.97  | 2.14 | 3.63E-04 | 1.04E-03 |
| 4841 | 7 | F2-3 vs. S2-3 | 254468_at | AT4G20460 | NAD(P)-binding Rossmann-fold superfamily protein;(source:Araport11)                                                                                                                                                                                                                                                                                                                                                                                                                                                                                                                                              | 32.39  | 15.12  | 2.14 | 1.22E-05 | 8.58E-05 |
| 4842 | 7 | F2-3 vs. S2-3 | 250206_at | AT5G14040 | Encodes a mitochondrial phosphate transporter. Modulates plant responses to salt stress.                                                                                                                                                                                                                                                                                                                                                                                                                                                                                                                         | 1843.2 | 859.62 | 2.14 | 5.90E-05 | 2.66E-04 |
| 4843 | 7 | F2-3 vs. S2-3 | 245929_at | AT5G24760 | GroES-like zinc-binding dehydrogenase family protein;(source:Araport11)                                                                                                                                                                                                                                                                                                                                                                                                                                                                                                                                          | 168.55 | 78.93  | 2.14 | 1.10E-04 | 4.19E-04 |
| 4844 | 7 | F2-3 vs. S2-3 | 262626_at | AT1G06430 | encodes a FtsH protease that is localized to the chloroplast                                                                                                                                                                                                                                                                                                                                                                                                                                                                                                                                                     | 51.86  | 24.4   | 2.13 | 9.09E-05 | 3.64E-04 |
| 4845 | 7 | F2-3 vs. S2-3 | 263419_at | AT2G17220 | Encodes a putative serine/threonine-specific protein kinase kin3. Protein is N-myristoylated.                                                                                                                                                                                                                                                                                                                                                                                                                                                                                                                    | 97.02  | 45.63  | 2.13 | 3.26E-04 | 9.51E-04 |
| 4846 | 7 | F2-3 vs. S2-3 | 263528_at | AT2G24800 | Peroxidase superfamily protein;(source:Araport11)                                                                                                                                                                                                                                                                                                                                                                                                                                                                                                                                                                | 24.4   | 11.43  | 2.13 | 8.17E-05 | 3.36E-04 |

|      |   |               |                 |           |                                                                                                                                                                                                                                                                                                                                                                                                                                                                                                                                                                                                                                                                                                                                                                                             |         |         |      |          |          |
|------|---|---------------|-----------------|-----------|---------------------------------------------------------------------------------------------------------------------------------------------------------------------------------------------------------------------------------------------------------------------------------------------------------------------------------------------------------------------------------------------------------------------------------------------------------------------------------------------------------------------------------------------------------------------------------------------------------------------------------------------------------------------------------------------------------------------------------------------------------------------------------------------|---------|---------|------|----------|----------|
|      |   |               |                 |           | Encodes a protein-serine kinase that phosphorylates ribosomal protein in vitro. Activation of AtS6k is regulated by 1-naphthylacetic acid and kinetin, at least in part, via a lipid kinase-dependent pathway. Involved in translational up-regulation of ribosomal proteins. Phosphorylated by PDK1. Interacts with RAPTOR1, which in turn interacts with TOR. SPK6 activity is affected by osmotic stress, and plants overexpressing S6k1 are hypersensitive to osmotic stress. The gene is expressed in all tissues examined, with highest expression level detected in metabolically active tissues.                                                                                                                                                                                    | 29.3    | 13.76   | 2.13 | 2.78E-04 | 8.40E-04 |
| 4847 | 7 | F2-3 vs. S2-3 | 258677_at       | AT3G08730 |                                                                                                                                                                                                                                                                                                                                                                                                                                                                                                                                                                                                                                                                                                                                                                                             |         |         |      |          |          |
| 4848 | 7 | F2-3 vs. S2-3 | 257745_at       | AT3G29240 | PPR containing protein (DUF179);(source:Araport11)                                                                                                                                                                                                                                                                                                                                                                                                                                                                                                                                                                                                                                                                                                                                          | 385.1   | 180.77  | 2.13 | 6.67E-04 | 1.65E-03 |
| 4849 | 7 | F2-3 vs. S2-3 | 261560_at       | AT1G01710 | acyl-CoA thioesterase II;(source:Araport11)                                                                                                                                                                                                                                                                                                                                                                                                                                                                                                                                                                                                                                                                                                                                                 | 118.34  | 55.77   | 2.12 | 3.12E-04 | 9.20E-04 |
| 4850 | 7 | F2-3 vs. S2-3 | 261379_at       | AT1G18720 | ER membrane protein, putative (DUF962);(source:Araport11)                                                                                                                                                                                                                                                                                                                                                                                                                                                                                                                                                                                                                                                                                                                                   | 183.38  | 86.53   | 2.12 | 1.28E-04 | 4.70E-04 |
| 4851 | 7 | F2-3 vs. S2-3 | 261107_at       | AT1G63010 | Encodes an SPX domain protein that transports Pi into the vacuole and is essential for phosphate homeostasis.                                                                                                                                                                                                                                                                                                                                                                                                                                                                                                                                                                                                                                                                               | 235.52  | 111.29  | 2.12 | 1.14E-04 | 4.32E-04 |
| 4852 | 7 | F2-3 vs. S2-3 | 256673_at       | AT3G52370 | Fasciclin-like arabinogalactan protein. Possibly involved in embryogenesis and seed development.                                                                                                                                                                                                                                                                                                                                                                                                                                                                                                                                                                                                                                                                                            | 89.63   | 42.36   | 2.12 | 2.41E-05 | 1.39E-04 |
| 4853 | 7 | F2-3 vs. S2-3 | 254744_at       | AT4G13345 | Serinc-domain containing serine and sphingolipid biosynthesis protein;(source:Araport11)                                                                                                                                                                                                                                                                                                                                                                                                                                                                                                                                                                                                                                                                                                    | 30.96   | 14.6    | 2.12 | 2.30E-04 | 7.28E-04 |
|      |   |               |                 |           | Encodes a GPCR-type G protein receptor with nine predicted transmembrane domains. The protein binds abscisic acid (ABA) and is predicted to function as an ABA receptor. It has GTP-binding and GTPase activity and binds to ABA more effectively in the presence of GDP. GTG2 binds to GPA1, the alpha subunit of the heterotrimeric G protein. GPA1 (in its GTP-bound state) affects the GTP binding and GTPase activity of GTG2 and may act to down-regulate GTG2 binding to ABA. GTG2 is widely expressed throughout the plant and appears to be involved in the regulation of several ABA-dependent responses including seed germination, plant development, and promotion of stomatal closure. GTG2 transcript levels do not appear to change in response to ABA or abiotic stresses. |         |         |      |          |          |
| 4854 | 7 | F2-3 vs. S2-3 | 262869_s_a<br>t | AT4G27630 |                                                                                                                                                                                                                                                                                                                                                                                                                                                                                                                                                                                                                                                                                                                                                                                             | 86.05   | 40.58   | 2.12 | 9.94E-04 | 2.28E-03 |
|      |   |               |                 |           | encodes a protein whose sequence is similar to phenylcoumaran benzylic ether reductase (PCBER), which catalyzes NADPH-dependent reduction of 8-5' linked lignans such as dehydrodiconiferyl alcohol to give isodihydrodehydrodiconiferyl alcohol.                                                                                                                                                                                                                                                                                                                                                                                                                                                                                                                                           | 38.73   | 18.29   | 2.12 | 3.78E-04 | 1.07E-03 |
| 4855 | 7 | F2-3 vs. S2-3 | 252939_at       | AT4G39230 |                                                                                                                                                                                                                                                                                                                                                                                                                                                                                                                                                                                                                                                                                                                                                                                             |         |         |      |          |          |
| 4856 | 7 | F2-3 vs. S2-3 | 249828_at       | AT5G23250 | Succinyl-CoA ligase, alpha subunit;(source:Araport11)                                                                                                                                                                                                                                                                                                                                                                                                                                                                                                                                                                                                                                                                                                                                       | 132.12  | 62.18   | 2.12 | 1.41E-05 | 9.54E-05 |
| 4857 | 7 | F2-3 vs. S2-3 | 249346_at       | AT5G40780 | Encodes LHT1 (lysine histidine transporter), a high-affinity transporter for cellular amino acid uptake in both root epidermis and leaf mesophyll.                                                                                                                                                                                                                                                                                                                                                                                                                                                                                                                                                                                                                                          | 103.99  | 48.99   | 2.12 | 9.90E-06 | 7.47E-05 |
| 4858 | 7 | F2-3 vs. S2-3 | 262813_at       | AT1G11670 | MATE efflux family protein;(source:Araport11)                                                                                                                                                                                                                                                                                                                                                                                                                                                                                                                                                                                                                                                                                                                                               | 30.51   | 14.44   | 2.11 | 4.67E-04 | 1.25E-03 |
| 4859 | 7 | F2-3 vs. S2-3 | 264395_at       | AT1G12070 | Immunoglobulin E-set superfamily protein;(source:Araport11)                                                                                                                                                                                                                                                                                                                                                                                                                                                                                                                                                                                                                                                                                                                                 | 29.94   | 14.2    | 2.11 | 5.35E-05 | 2.49E-04 |
| 4860 | 7 | F2-3 vs. S2-3 | 264223_s_a      | AT1G67520 | lectin protein kinase family protein;(source:Araport11)                                                                                                                                                                                                                                                                                                                                                                                                                                                                                                                                                                                                                                                                                                                                     | 23.27   | 11.05   | 2.11 | 1.45E-04 | 5.18E-04 |
| 4861 | 7 | F2-3 vs. S2-3 | 249063_at       | AT5G44110 | Encodes a member of the NAP subfamily of ABC transporters whose expression pattern is regulated by light and sucrose.                                                                                                                                                                                                                                                                                                                                                                                                                                                                                                                                                                                                                                                                       | 186.19  | 88.15   | 2.11 | 5.50E-05 | 2.54E-04 |
| 4862 | 7 | F2-3 vs. S2-3 | 245006_at       | ATCG00340 | Encodes the D1 subunit of photosystem I reaction center. Encodes PSB33, a protein conserved in the plastid lineage. PSB33 is associated with the chloroplast thylakoid membrane and provides stability to Photosystem II. The mRNA is cell-to-cell mobile.                                                                                                                                                                                                                                                                                                                                                                                                                                                                                                                                  | 4204.96 | 1992.45 | 2.11 | 2.46E-04 | 7.64E-04 |
| 4863 | 7 | F2-3 vs. S2-3 | 259896_at       | AT1G71500 |                                                                                                                                                                                                                                                                                                                                                                                                                                                                                                                                                                                                                                                                                                                                                                                             | 66.66   | 31.71   | 2.1  | 3.03E-04 | 9.02E-04 |
| 4864 | 7 | F2-3 vs. S2-3 | 258748_at       | AT3G05930 | germin-like protein (GLP8)                                                                                                                                                                                                                                                                                                                                                                                                                                                                                                                                                                                                                                                                                                                                                                  | 39.33   | 18.71   | 2.1  | 1.32E-05 | 9.10E-05 |
| 4865 | 7 | F2-3 vs. S2-3 | 256392_at       | AT3G06260 | Encodes a protein with putative galacturonosyltransferase activity.                                                                                                                                                                                                                                                                                                                                                                                                                                                                                                                                                                                                                                                                                                                         | 27.08   | 12.89   | 2.1  | 2.51E-04 | 7.75E-04 |
| 4866 | 7 | F2-3 vs. S2-3 | 257238_at       | AT3G17430 | Nucleotide/sugar transporter family protein The mRNA is cell-to-cell mobile.                                                                                                                                                                                                                                                                                                                                                                                                                                                                                                                                                                                                                                                                                                                | 123.75  | 58.81   | 2.1  | 5.84E-05 | 2.64E-04 |
|      |   |               |                 |           | Encodes a plant-specific glucan phosphatase that contains a noncatalytic carbohydrate-binding module as well as a dual specificity protein phosphatase domain. SEX4 can dephosphorylate C6- and C3-glucosyl residues on native starch grains and related maltodextrin compounds in vitro. This protein interacts with the plant SnRK AKIN11, binds starch, and is localized in the chloroplast. sex4 mutants have elevated levels of starch.                                                                                                                                                                                                                                                                                                                                                | 188.55  | 89.58   | 2.1  | 6.63E-04 | 1.65E-03 |
| 4867 | 7 | F2-3 vs. S2-3 | 256676_at       | AT3G52180 |                                                                                                                                                                                                                                                                                                                                                                                                                                                                                                                                                                                                                                                                                                                                                                                             |         |         |      |          |          |
| 4868 | 7 | F2-3 vs. S2-3 | 254165_at       | AT4G24330 | hypothetical protein (DUF1682);(source:Araport11)                                                                                                                                                                                                                                                                                                                                                                                                                                                                                                                                                                                                                                                                                                                                           | 89.32   | 42.62   | 2.1  | 3.71E-05 | 1.91E-04 |
| 4869 | 7 | F2-3 vs. S2-3 | 254077_at       | AT4G25640 | Encodes a multidrug and toxin efflux family transporter. Involved in flavonoid metabolism, affecting Root growth, seed development and germination, and pollen development, release and viability.                                                                                                                                                                                                                                                                                                                                                                                                                                                                                                                                                                                          | 202.53  | 96.53   | 2.1  | 2.50E-05 | 1.43E-04 |



|      |   |               |           |           |                                                                                                                                                                                                                                                                                                                                                                                                                                                                                                                                                                                                       |         |        |      |          |          |
|------|---|---------------|-----------|-----------|-------------------------------------------------------------------------------------------------------------------------------------------------------------------------------------------------------------------------------------------------------------------------------------------------------------------------------------------------------------------------------------------------------------------------------------------------------------------------------------------------------------------------------------------------------------------------------------------------------|---------|--------|------|----------|----------|
| 4870 | 7 | F2-3 vs. S2-3 | 249581_at | AT5G37600 | encodes a cytosolic glutamine synthetase, the enzyme has high affinity with substrate ammonium                                                                                                                                                                                                                                                                                                                                                                                                                                                                                                        | 430.69  | 204.74 | 2.1  | 2.64E-04 | 8.07E-04 |
| 4871 | 7 | F2-3 vs. S2-3 | 264602_at | AT1G04700 | PB1 domain-containing protein tyrosine kinase;(source:Araport11)                                                                                                                                                                                                                                                                                                                                                                                                                                                                                                                                      | 25.72   | 12.33  | 2.09 | 4.59E-04 | 1.24E-03 |
| 4872 | 7 | F2-3 vs. S2-3 | 261455_at | AT1G21070 | Nucleotide-sugar transporter family protein;(source:Araport11)                                                                                                                                                                                                                                                                                                                                                                                                                                                                                                                                        | 34.4    | 16.49  | 2.09 | 1.53E-05 | 1.00E-04 |
| 4873 | 7 | F2-3 vs. S2-3 | 262500_at | AT1G21760 | This gene is predicted to encode an F-box protein that is evolutionarily conserved between Arabidopsis and other eukaryotes including S.cerevisiae and humans. It may play a role in regulating translation under conditions of temperature stress. FBP7 transcript levels are increased at high and low temperatures. The mRNA is cell-to-cell mobile.                                                                                                                                                                                                                                               | 66.87   | 31.94  | 2.09 | 2.69E-05 | 1.50E-04 |
| 4874 | 7 | F2-3 vs. S2-3 | 264752_at | AT1G23010 | Encodes a protein with multicopper oxidase activity. Located in ER. Function together with LPR2 (AT1G71040) and a P5-type ATPase (At5g23630/PDR2) in a common pathway that adjusts root meristem activity to Pi (inorganic phosphate) availability.                                                                                                                                                                                                                                                                                                                                                   | 32.74   | 15.65  | 2.09 | 7.35E-05 | 3.09E-04 |
| 4875 | 7 | F2-3 vs. S2-3 | 256209_at | AT1G50940 | Encodes the electron transfer flavoprotein ETF alpha, a putative subunit of the mitochondrial electron transfer flavoprotein complex (ETF beta is At5g43430.1) in Arabidopsis. Mutations of the ETF beta gene results in accelerated senescence and early death compared to wild-type during extended darkness.                                                                                                                                                                                                                                                                                       | 95.79   | 45.84  | 2.09 | 7.02E-05 | 2.99E-04 |
| 4876 | 7 | F2-3 vs. S2-3 | 265807_at | AT2G17990 | Calcium-dependent protein kinase 1 adaptor protein involved in vacuolar transport and lytic vacuole biogenesis.                                                                                                                                                                                                                                                                                                                                                                                                                                                                                       | 29.79   | 14.27  | 2.09 | 1.16E-04 | 4.36E-04 |
| 4877 | 7 | F2-3 vs. S2-3 | 265419_at | AT2G20840 | Secretory carrier membrane protein (SCAMP) family protein;(source:Araport11)                                                                                                                                                                                                                                                                                                                                                                                                                                                                                                                          | 509     | 244.03 | 2.09 | 3.42E-05 | 1.79E-04 |
| 4878 | 7 | F2-3 vs. S2-3 | 267304_at | AT2G30080 | member of Fe(II) transporter isolog family. Gene expression is not regulated by iron, copper, or zinc deficiency or excess.                                                                                                                                                                                                                                                                                                                                                                                                                                                                           | 36.91   | 17.64  | 2.09 | 9.23E-05 | 3.68E-04 |
| 4879 | 7 | F2-3 vs. S2-3 | 266101_at | AT2G37940 | Inositol phosphorylceramide synthase 2;(source:Araport11)                                                                                                                                                                                                                                                                                                                                                                                                                                                                                                                                             | 99.98   | 47.86  | 2.09 | 7.19E-04 | 1.75E-03 |
| 4880 | 7 | F2-3 vs. S2-3 | 260567_at | AT2G43820 | Encodes a nicotinate-O-glycosyltransferase. Induced by Salicylic acid, virus, fungus and bacteria. Also involved in the tryptophan synthesis pathway. Independent of NPR1 for their induction by salicylic acid. UGT74F1 transfers UDP:glucose to salicylic acid (forming a glucoside (SAG) and a glucose ester (SGE)), benzoic acid, and anthranilate in vitro. UGT74F2 shows a weak ability to catalyze the formation of the p-aminobenzoate-glucose ester in vitro. But, UGT75B1 appears to be the dominant pABA acylglucosyltransferase in vivo based on assays in leaves, flowers, and siliques. | 138.27  | 66.06  | 2.09 | 5.68E-04 | 1.46E-03 |
| 4881 | 7 | F2-3 vs. S2-3 | 252496_at | AT3G46790 | Encodes a member of a PCMP (plant combinatorial and modular protein) family (PCMP-H subfamily) with 9 pentatricopeptide (PPR) repeats. The protein is involved in the intergenic processing of chloroplast RNA between rps7 and ndhB, which is essential for ndhB translation.                                                                                                                                                                                                                                                                                                                        | 136.39  | 65.33  | 2.09 | 3.65E-04 | 1.04E-03 |
| 4882 | 7 | F2-3 vs. S2-3 | 254776_at | AT4G13360 | ATP-dependent caseinolytic (Clp) protease/crotonase family protein;(source:Araport11)                                                                                                                                                                                                                                                                                                                                                                                                                                                                                                                 | 134.82  | 64.49  | 2.09 | 9.42E-04 | 2.18E-03 |
| 4883 | 7 | F2-3 vs. S2-3 | 253719_at | AT4G29490 | Metalloproteinase M24 family protein;(source:Araport11)                                                                                                                                                                                                                                                                                                                                                                                                                                                                                                                                               | 71.85   | 34.31  | 2.09 | 4.63E-04 | 1.25E-03 |
| 4884 | 7 | F2-3 vs. S2-3 | 250533_at | AT5G08640 | Encodes a flavonol synthase that catalyzes formation of flavonols from dihydroflavonols. Co-expressed with CHI and CHS (qRT-PCR).                                                                                                                                                                                                                                                                                                                                                                                                                                                                     | 37.58   | 18     | 2.09 | 1.78E-04 | 6.02E-04 |
| 4885 | 7 | F2-3 vs. S2-3 | 250335_at | AT5G11650 | alpha/beta-Hydrolases superfamily protein;(source:Araport11)                                                                                                                                                                                                                                                                                                                                                                                                                                                                                                                                          | 128.81  | 61.58  | 2.09 | 2.37E-04 | 7.44E-04 |
| 4886 | 7 | F2-3 vs. S2-3 | 250014_at | AT5G17990 | Encodes the tryptophan biosynthetic enzyme phosphoribosylanthranilate transferase (PAT1, called trpD in bacteria). Converts anthranilate and phosphoribosylpyrophosphate into phosphoribosylanthranilate and inorganic pyrophosphate. The mRNA is cell-to-cell mobile.                                                                                                                                                                                                                                                                                                                                | 279.86  | 134    | 2.09 | 2.10E-04 | 6.85E-04 |
| 4887 | 7 | F2-3 vs. S2-3 | 247813_at | AT5G58330 | lactate/malate dehydrogenase family protein;(source:Araport11)                                                                                                                                                                                                                                                                                                                                                                                                                                                                                                                                        | 656.01  | 314.23 | 2.09 | 4.73E-05 | 2.28E-04 |
| 4888 | 7 | F2-3 vs. S2-3 | 247156_at | AT5G65760 | Serine carboxypeptidase S28 family protein;(source:Araport11)                                                                                                                                                                                                                                                                                                                                                                                                                                                                                                                                         | 256.77  | 123.08 | 2.09 | 2.31E-04 | 7.32E-04 |
| 4889 | 7 | F2-3 vs. S2-3 | 264506_at | AT1G09560 | Encodes a plasodesmata-located protein involved in regulating primary root growth by controlling phloem-mediated allocation of resources between the primary and lateral root meristems. The mRNA is cell-to-cell mobile.                                                                                                                                                                                                                                                                                                                                                                             | 138.54  | 66.62  | 2.08 | 3.37E-04 | 9.77E-04 |
| 4890 | 7 | F2-3 vs. S2-3 | 265026_at | AT1G24360 | NAD(P)-binding Rossmann-fold superfamily protein;(source:Araport11)                                                                                                                                                                                                                                                                                                                                                                                                                                                                                                                                   | 1381.36 | 664.28 | 2.08 | 7.10E-05 | 3.01E-04 |
| 4891 | 7 | F2-3 vs. S2-3 | 261296_at | AT1G48460 | tRNA-processing ribonuclease BN;(source:Araport11)                                                                                                                                                                                                                                                                                                                                                                                                                                                                                                                                                    | 300.3   | 144.41 | 2.08 | 2.20E-05 | 1.30E-04 |
| 4892 | 7 | F2-3 vs. S2-3 | 262959_at | AT1G54290 | Translation initiation factor SUI1 family protein;(source:Araport11)                                                                                                                                                                                                                                                                                                                                                                                                                                                                                                                                  | 479.26  | 230.08 | 2.08 | 4.09E-05 | 2.06E-04 |
| 4893 | 7 | F2-3 vs. S2-3 | 266856_at | AT2G26910 | Encodes a member of the PLEIOTROPIC DRUG RESISTANCE family of ATP binding cassette transporters. Required for the formation of a functional cuticle.                                                                                                                                                                                                                                                                                                                                                                                                                                                  | 115.71  | 55.6   | 2.08 | 1.60E-04 | 5.58E-04 |

|      |   |               |           |           |                                                                                                                                                                                                                                                                                                                                                                                                                                                                                                                                                                                                                                                                                                                                                                                                                                                                                                                                                             |        |        |      |          |          |
|------|---|---------------|-----------|-----------|-------------------------------------------------------------------------------------------------------------------------------------------------------------------------------------------------------------------------------------------------------------------------------------------------------------------------------------------------------------------------------------------------------------------------------------------------------------------------------------------------------------------------------------------------------------------------------------------------------------------------------------------------------------------------------------------------------------------------------------------------------------------------------------------------------------------------------------------------------------------------------------------------------------------------------------------------------------|--------|--------|------|----------|----------|
| 4894 | 7 | F2-3 vs. S2-3 | 255624_at | AT4G01370 | Encodes a nuclear and cytoplasmically localized MAP kinase involved in mediating responses to pathogens. Its substrates include MKS1 and probably MAP65-1. The MAP65-1 interaction is involved in mediating cortical microtubule organization. Required for male-specific meiotic cytokinesis. The mRNA is cell-to-cell mobile.                                                                                                                                                                                                                                                                                                                                                                                                                                                                                                                                                                                                                             | 41.32  | 19.82  | 2.08 | 2.74E-05 | 1.52E-04 |
| 4895 | 7 | F2-3 vs. S2-3 | 254033_at | AT4G25950 | V-ATPase G-subunit like protein<br>ACYL-COA:1-ACYLGLYCEROL-3-PHOSPHATE ACYLTRANSFERASE, PUTATIVE SIMILAR TO ACYL-COA:1-ACYLGLYCEROL-3-PHOSPHATE ACYLTRANSFERASE GI:4583544 FROM [BRASSICA NAPUS]<br>Gibberellin-regulated family protein;(source:Araport11)                                                                                                                                                                                                                                                                                                                                                                                                                                                                                                                                                                                                                                                                                                 | 17.45  | 8.4    | 2.08 | 9.69E-04 | 2.23E-03 |
| 4896 | 7 | F2-3 vs. S2-3 | 265134_at | AT1G51260 |                                                                                                                                                                                                                                                                                                                                                                                                                                                                                                                                                                                                                                                                                                                                                                                                                                                                                                                                                             | 35.67  | 17.25  | 2.07 | 6.00E-04 | 1.53E-03 |
| 4897 | 7 | F2-3 vs. S2-3 | 266613_at | AT2G14900 |                                                                                                                                                                                                                                                                                                                                                                                                                                                                                                                                                                                                                                                                                                                                                                                                                                                                                                                                                             | 794.33 | 384.49 | 2.07 | 2.06E-04 | 6.77E-04 |
| 4898 | 7 | F2-3 vs. S2-3 | 258288_at | AT3G23290 | LIGHT-DEPENDENT SHORT HYPOCOTYLS-like protein (DUF640);(source:Araport11)                                                                                                                                                                                                                                                                                                                                                                                                                                                                                                                                                                                                                                                                                                                                                                                                                                                                                   | 34.12  | 16.46  | 2.07 | 1.72E-04 | 5.88E-04 |
| 4899 | 7 | F2-3 vs. S2-3 | 249148_at | AT5G43260 | chaperone protein dnaJ-like protein;(source:Araport11)                                                                                                                                                                                                                                                                                                                                                                                                                                                                                                                                                                                                                                                                                                                                                                                                                                                                                                      | 117.41 | 56.59  | 2.07 | 3.79E-04 | 1.07E-03 |
| 4900 | 7 | F2-3 vs. S2-3 | 264993_at | AT1G67290 | glyoxal oxidase-related protein;(source:Araport11)                                                                                                                                                                                                                                                                                                                                                                                                                                                                                                                                                                                                                                                                                                                                                                                                                                                                                                          | 44.2   | 21.47  | 2.06 | 3.89E-05 | 1.97E-04 |
| 4901 | 7 | F2-3 vs. S2-3 | 257699_at | AT3G12780 | PGK1 was localized exclusively in the chloroplasts of photosynthetic tissues and is the photosynthetic isoform. The pgk1.1 knock-down mutant displayed reduced growth, lower photosynthetic capacity and starch content. Expression studies in PGK mutants showed that PGK1 and PGK3 were down-regulated in pgk3.2 and pgk1.1, respectively. These results indicate that the down-regulation of photosynthetic activity could be a plant strategy when glycolysis is impaired to achieve metabolic adjustment and optimize growth (DOI:10.1104/pp.17.01227). Functions redundantly with AT1G56190 in the chloroplast in the biosynthesis of thylakoid membrane galactolipids. Double mutants are photosynthetically incompetent, plants are albino and seedling lethal                                                                                                                                                                                      | 665.88 | 322.56 | 2.06 | 8.09E-05 | 3.34E-04 |
| 4902 | 7 | F2-3 vs. S2-3 | 258399_at | AT3G15540 | Primary auxin-responsive gene. Involved in the regulation stamen filaments development.                                                                                                                                                                                                                                                                                                                                                                                                                                                                                                                                                                                                                                                                                                                                                                                                                                                                     | 269.66 | 130.7  | 2.06 | 1.85E-05 | 1.14E-04 |
| 4903 | 7 | F2-3 vs. S2-3 | 252321_at | AT3G48510 | ABA&#8208;induced transcription repressor that acts as feedback regulator in ABA signalling.                                                                                                                                                                                                                                                                                                                                                                                                                                                                                                                                                                                                                                                                                                                                                                                                                                                                | 64.34  | 31.2   | 2.06 | 9.05E-05 | 3.64E-04 |
| 4904 | 7 | F2-3 vs. S2-3 | 251616_at | AT3G57990 | Encodes a ?-barrel protein, named OEP40, locates in in the outer envelope of chloroplasts, and functions as a solute channel which is selectively permeable for glucose.                                                                                                                                                                                                                                                                                                                                                                                                                                                                                                                                                                                                                                                                                                                                                                                    | 86.21  | 41.81  | 2.06 | 2.72E-05 | 1.51E-04 |
| 4905 | 7 | F2-3 vs. S2-3 | 254577_at | AT4G19450 | Major facilitator superfamily protein;(source:Araport11)                                                                                                                                                                                                                                                                                                                                                                                                                                                                                                                                                                                                                                                                                                                                                                                                                                                                                                    | 333.2  | 161.67 | 2.06 | 3.84E-04 | 1.08E-03 |
| 4906 | 7 | F2-3 vs. S2-3 | 254543_at | AT4G19810 | ChiC encodes a Class V chitinase that is a part of glycoside hydrolase family 18 based on CAZy groupings. It appears to primarily act as an exochitinase in vitro where it predominantly cleaves a chitobiose (GlcNAc)2 residue from the non-reducing end of a chitin oligosaccharide. However, it shows some minor endochitinase activity in vitro, as well. A putative 24 amino-acid signal peptide may direct this protein to the secretory system and it has been detected in cell wall apoplastic fluid. RT-PCR experiments demonstrate that ChiC transcript levels are increased in response to abscisic acid, jasmonic acid, and NaCl stress. Microarray results also suggest that transcript levels rise in response to osmotic stress, two fungal pathogens, a bacterial pathogen, and the elicitor flagellin. The mRNA is cell-to-cell mobile.                                                                                                    | 39.31  | 19.1   | 2.06 | 1.03E-04 | 4.00E-04 |
| 4907 | 7 | F2-3 vs. S2-3 | 254082_at | AT4G25720 | Encodes a protein with similarity to gamma-glutamylcyclotransferase that is involved in catalyzing the formation of pyroglutamate residue on proteins that have been post-translationally processed to reveal a glutamine at their N-terminus. Some pathogenesis related proteins may be modified in this matter. In vitro the enzyme (using a protein that does not match AT4G25720.1, AT4G25720.2, or AT4G25720.3) works on a broad range of synthetic peptides, but shows some preference for substrates that have a hydrophobic residues adjacent to the glutamine. It can also act on a N-terminal glutamic residue in a synthetic substrate (Schilling 2007). It does not appear to have the ability to transform GSH or gamma-glutamyl cysteine to 5-oxoproline (Okhama-Ohtsu 2008). This protein is predicted to enter the secretory pathway. When it is expressed in a heterologous system, two glycosylated forms of the protein can be detected. | 71.43  | 34.71  | 2.06 | 5.25E-04 | 1.38E-03 |
| 4908 | 7 | F2-3 vs. S2-3 | 248711_at | AT5G48270 | DUF868 family protein (DUF868);(source:Araport11)                                                                                                                                                                                                                                                                                                                                                                                                                                                                                                                                                                                                                                                                                                                                                                                                                                                                                                           | 19.56  | 9.5    | 2.06 | 1.69E-04 | 5.79E-04 |
| 4909 | 7 | F2-3 vs. S2-3 | 259416_at | AT1G02305 | Encodes a capase involved in stress induced cell death.                                                                                                                                                                                                                                                                                                                                                                                                                                                                                                                                                                                                                                                                                                                                                                                                                                                                                                     | 707.16 | 344.78 | 2.05 | 6.47E-04 | 1.62E-03 |
| 4910 | 7 | F2-3 vs. S2-3 | 261312_at | AT1G05790 | lipase class 3 family protein;(source:Araport11)                                                                                                                                                                                                                                                                                                                                                                                                                                                                                                                                                                                                                                                                                                                                                                                                                                                                                                            | 68.83  | 33.61  | 2.05 | 3.94E-04 | 1.10E-03 |

|      |   |               |           |           |                                                                                                                                                                                                                                                                                                                                                                                                                                                                                                                                                                                                                                       |        |        |      |          |          |
|------|---|---------------|-----------|-----------|---------------------------------------------------------------------------------------------------------------------------------------------------------------------------------------------------------------------------------------------------------------------------------------------------------------------------------------------------------------------------------------------------------------------------------------------------------------------------------------------------------------------------------------------------------------------------------------------------------------------------------------|--------|--------|------|----------|----------|
| 4911 | 7 | F2-3 vs. S2-3 | 259693_at | AT1G63060 | ribosome biogenesis NEP1-like protein;(source:Araport11)<br><br>Encodes one of the two Arabidopsis homologues to YBR159w encoding a <i>S. cerevisiae</i> beta-ketoacyl reductase (KCR), which catalyzes the first reduction during VLCFA (very long chain fatty acids, >18 carbon) elongation: KCR1 (At1g67730), KCR2 (At1g24470). Complementation of the yeast ybr159Delta mutant demonstrated that the two KCR proteins are divergent and that only AtKCR1 can restore heterologous elongase activity similar to the native yeast KCR gene. The mRNA is cell-to-cell mobile.                                                        | 21.12  | 10.29  | 2.05 | 1.58E-05 | 1.03E-04 |
| 4912 | 7 | F2-3 vs. S2-3 | 245199_at | AT1G67730 | Encodes a close relative of the amino acid transporter ANT1 (AT3G11900).                                                                                                                                                                                                                                                                                                                                                                                                                                                                                                                                                              | 1373.6 | 668.96 | 2.05 | 1.77E-05 | 1.11E-04 |
| 4913 | 7 | F2-3 vs. S2-3 | 260290_at | AT1G80510 | Encodes a protein with beta-glucosidase and galactosyltransferase activity, mutants show increased sensitivity to freezing. Though it is classified as a family I glycosyl hydrolase, it has no hydrolase activity in vitro.                                                                                                                                                                                                                                                                                                                                                                                                          | 87.62  | 42.82  | 2.05 | 1.23E-04 | 4.57E-04 |
| 4914 | 7 | F2-3 vs. S2-3 | 258512_at | AT3G06510 | Cysteine proteinases superfamily protein;(source:Araport11)                                                                                                                                                                                                                                                                                                                                                                                                                                                                                                                                                                           | 610.79 | 297.93 | 2.05 | 1.33E-04 | 4.83E-04 |
| 4915 | 7 | F2-3 vs. S2-3 | 258006_at | AT3G19400 | Class I glutamine amidotransferase-like superfamily protein;(source:Araport11)                                                                                                                                                                                                                                                                                                                                                                                                                                                                                                                                                        | 215.29 | 104.97 | 2.05 | 6.15E-04 | 1.55E-03 |
| 4916 | 7 | F2-3 vs. S2-3 | 253639_at | AT4G30550 | TIM-barrel signal transduction protein;(source:Araport11)                                                                                                                                                                                                                                                                                                                                                                                                                                                                                                                                                                             | 37.34  | 18.21  | 2.05 | 9.47E-05 | 3.75E-04 |
| 4917 | 7 | F2-3 vs. S2-3 | 247077_at | AT5G66420 | RHOMBOID-like 1;(source:Araport11)                                                                                                                                                                                                                                                                                                                                                                                                                                                                                                                                                                                                    | 189.93 | 92.64  | 2.05 | 3.80E-04 | 1.07E-03 |
| 4918 | 7 | F2-3 vs. S2-3 | 266774_at | AT2G29050 | Encodes a BBE-like enzyme that acts in monolignol metabolism by catalyzing the oxidation of aromatic allylic alcohols, such as coumaryl-, sinapyl-, and coniferyl alcohol, to the corresponding aldehydes.                                                                                                                                                                                                                                                                                                                                                                                                                            | 100.17 | 49.09  | 2.04 | 6.38E-04 | 1.60E-03 |
| 4919 | 7 | F2-3 vs. S2-3 | 267414_at | AT2G34790 | Peroxisome-localized copper amine oxidase involved in lateral root formation.                                                                                                                                                                                                                                                                                                                                                                                                                                                                                                                                                         | 20.04  | 9.85   | 2.04 | 4.28E-04 | 1.17E-03 |
| 4920 | 7 | F2-3 vs. S2-3 | 265882_at | AT2G42490 | Protein phosphatase 2C family protein;(source:Araport11)                                                                                                                                                                                                                                                                                                                                                                                                                                                                                                                                                                              | 1190.4 | 584.11 | 2.04 | 5.38E-04 | 1.40E-03 |
| 4921 | 7 | F2-3 vs. S2-3 | 258602_at | AT3G02750 | hypothetical protein;(source:Araport11)                                                                                                                                                                                                                                                                                                                                                                                                                                                                                                                                                                                               | 56.4   | 27.61  | 2.04 | 9.09E-05 | 3.64E-04 |
| 4922 | 7 | F2-3 vs. S2-3 | 256584_at | AT3G28750 | Senescence/dehydration-associated protein-like protein;(source:Araport11)                                                                                                                                                                                                                                                                                                                                                                                                                                                                                                                                                             | 23.38  | 11.48  | 2.04 | 6.02E-04 | 1.53E-03 |
| 4923 | 7 | F2-3 vs. S2-3 | 253113_at | AT4G35985 | Encodes a vacuolar sodium/proton antiporter involved in salt tolerance, ion homeostasis, and leaf development. The mRNA is cell-to-cell mobile.                                                                                                                                                                                                                                                                                                                                                                                                                                                                                       | 44.7   | 21.92  | 2.04 | 3.84E-04 | 1.08E-03 |
| 4924 | 7 | F2-3 vs. S2-3 | 246763_at | AT5G27150 | phosphatidylinositol-specific phospholipase C5;(source:Araport11)                                                                                                                                                                                                                                                                                                                                                                                                                                                                                                                                                                     | 77.92  | 38.29  | 2.04 | 6.72E-05 | 2.89E-04 |
| 4925 | 7 | F2-3 vs. S2-3 | 247775_at | AT5G58690 |                                                                                                                                                                                                                                                                                                                                                                                                                                                                                                                                                                                                                                       | 22.72  | 11.14  | 2.04 | 2.18E-04 | 7.01E-04 |
| 4926 | 7 | F2-3 vs. S2-3 | 263167_at | AT1G03030 | P-loop containing nucleoside triphosphate hydrolases superfamily protein;(source:Araport11)<br>Encodes a phosphoethanolamine N-methyltransferase that catalyses the last two methylation steps of the three sequential methylations of phosphoethanolamine (PEA) that are required for the synthesis of phosphocholine (PCho) in plants.                                                                                                                                                                                                                                                                                              | 54.03  | 26.65  | 2.03 | 3.63E-04 | 1.04E-03 |
| 4927 | 7 | F2-3 vs. S2-3 | 261309_at | AT1G48600 | beta carbonic anhydrase 6;(source:Araport11)                                                                                                                                                                                                                                                                                                                                                                                                                                                                                                                                                                                          | 114.46 | 56.38  | 2.03 | 4.25E-05 | 2.11E-04 |
| 4928 | 7 | F2-3 vs. S2-3 | 246396_at | AT1G58180 | encodes an peroxisomal NAD-malate dehydrogenase that is involved in fatty acid beta-oxidation through providing NAD to the process of converting fatty acyl CoA to acetyl CoA.                                                                                                                                                                                                                                                                                                                                                                                                                                                        | 198.42 | 97.66  | 2.03 | 3.13E-05 | 1.67E-04 |
| 4929 | 7 | F2-3 vs. S2-3 | 266457_at | AT2G22780 | plastid transcriptionally active 5;(source:Araport11)                                                                                                                                                                                                                                                                                                                                                                                                                                                                                                                                                                                 | 97.02  | 47.86  | 2.03 | 1.03E-04 | 4.00E-04 |
| 4930 | 7 | F2-3 vs. S2-3 | 254727_at | AT4G13670 | Survival protein SurE-like phosphatase/nucleotidase;(source:Araport11)                                                                                                                                                                                                                                                                                                                                                                                                                                                                                                                                                                | 155.14 | 76.46  | 2.03 | 2.12E-04 | 6.87E-04 |
| 4931 | 7 | F2-3 vs. S2-3 | 245330_at | AT4G14930 | leucine-rich repeat transmembrane protein kinase family protein;(source:Araport11)                                                                                                                                                                                                                                                                                                                                                                                                                                                                                                                                                    | 30.55  | 15.07  | 2.03 | 5.13E-05 | 2.42E-04 |
| 4932 | 7 | F2-3 vs. S2-3 | 250480_at | AT5G10290 | autophagy-related (ATG) gene                                                                                                                                                                                                                                                                                                                                                                                                                                                                                                                                                                                                          | 92.54  | 45.67  | 2.03 | 3.49E-05 | 1.83E-04 |
| 4933 | 7 | F2-3 vs. S2-3 | 248543_at | AT5G50230 | Encodes a close homolog of the Cauliflower OR (Orange) protein that is located in the chloroplast of light grown organs but in the nucleus of etiolated cotyledons. The function of OR is to induce the differentiation of proplastids or other noncolored plastids into chromoplasts for carotenoid accumulation. Both proteins contain a Cysteine-rich zinc finger domain that is highly specific to DnaJ-like molecular chaperons. The AtOR protein interacts directly with the PSY (phytoene synthase) protein and acts as a positive posttranscriptional regulator of its expression, thereby affecting carotenoid biosynthesis. | 105.07 | 51.69  | 2.03 | 2.98E-05 | 1.61E-04 |
| 4934 | 7 | F2-3 vs. S2-3 | 247544_at | AT5G61670 | ras-related small GTPase                                                                                                                                                                                                                                                                                                                                                                                                                                                                                                                                                                                                              | 65.64  | 32.42  | 2.02 | 4.68E-04 | 1.26E-03 |
| 4935 | 7 | F2-3 vs. S2-3 | 260870_at | AT1G43890 | Encodes a vacuolar glucose exporter that is induced in response to factors that activate vacuolar glucose pools like darkness, heat stress and wounding and repressed during conditions that trigger glucose accumulation in the vacuole like cold stress and external sugar supply.                                                                                                                                                                                                                                                                                                                                                  | 124.09 | 61.55  | 2.02 | 1.16E-04 | 4.38E-04 |
| 4936 | 7 | F2-3 vs. S2-3 | 256458_at | AT1G75220 | Encodes a phytanoyl-CoA 2-hydroxylase (PAHX). The mRNA is cell-to-cell mobile.                                                                                                                                                                                                                                                                                                                                                                                                                                                                                                                                                        | 241.63 | 119.49 | 2.02 | 1.19E-04 | 4.45E-04 |
| 4937 | 7 | F2-3 vs. S2-3 | 266351_at | AT2G01490 | basic helix-loop-helix (bHLH) DNA-binding superfamily protein;(source:Araport11)                                                                                                                                                                                                                                                                                                                                                                                                                                                                                                                                                      | 86.93  | 42.99  | 2.02 | 4.73E-04 | 1.27E-03 |
| 4938 | 7 | F2-3 vs. S2-3 | 255497_at | AT4G02590 |                                                                                                                                                                                                                                                                                                                                                                                                                                                                                                                                                                                                                                       |        |        |      |          |          |

|      |   |               |            |           |                                                                                                                                                                                                                                                                                                                                                                                                   |         |        |      |          |          |
|------|---|---------------|------------|-----------|---------------------------------------------------------------------------------------------------------------------------------------------------------------------------------------------------------------------------------------------------------------------------------------------------------------------------------------------------------------------------------------------------|---------|--------|------|----------|----------|
| 4939 | 7 | F2-3 vs. S2-3 | 254204_at  | AT4G24160 | Encodes a soluble lysophosphatidic acid acyltransferase with additional triacylglycerol lipase and phosphatidylcholine hydrolyzing enzymatic activities. Plays a pivotal role in maintaining the lipid homeostasis by regulating both phospholipid and neutral lipid levels.                                                                                                                      | 296.87  | 147.29 | 2.02 | 6.52E-05 | 2.84E-04 |
| 4940 | 7 | F2-3 vs. S2-3 | 254065_at  | AT4G25420 | Encodes gibberellin 20-oxidase that is involved in the later steps of the gibberellin biosynthetic pathway. Regulated by a circadian clock. Weak expression response to far red light.                                                                                                                                                                                                            | 42.05   | 20.86  | 2.02 | 8.28E-05 | 3.40E-04 |
| 4941 | 7 | F2-3 vs. S2-3 | 253698_at  | AT4G29680 | Alkaline-phosphatase-like family protein;(source:Araport11)<br>Encodes a plastid-localized aspartate aminotransferase. Does not display any PAT (glutamate/aspartate-prephenate aminotransferase) activity even in the presence of a high concentration of prephenate.                                                                                                                            | 24.08   | 11.94  | 2.02 | 3.68E-05 | 1.90E-04 |
| 4942 | 7 | F2-3 vs. S2-3 | 253481_at  | AT4G31990 | Glutathione S-transferase family protein;(source:Araport11)                                                                                                                                                                                                                                                                                                                                       | 649.81  | 322.22 | 2.02 | 2.20E-04 | 7.07E-04 |
| 4943 | 7 | F2-3 vs. S2-3 | 250967_at  | AT5G02790 | Haloacid dehalogenase-like hydrolase (HAD) superfamily protein;(source:Araport11)                                                                                                                                                                                                                                                                                                                 | 117.92  | 58.43  | 2.02 | 4.71E-05 | 2.27E-04 |
| 4944 | 7 | F2-3 vs. S2-3 | 247228_at  | AT5G65140 | Peptidase M20/M25/M40 family protein;(source:Araport11)                                                                                                                                                                                                                                                                                                                                           | 99.14   | 49.06  | 2.02 | 2.48E-05 | 1.42E-04 |
| 4945 | 7 | F2-3 vs. S2-3 | 261326_s_a | AT1G44820 | One of three genes encoding the vacuolar ATP synthase subunit B1. This subunit was shown to interact with the gene product of hexokinase1 (ATHXK1). This interaction, however, is solely restricted to the nucleus. The protein binds to and co-localizes with F-actin, bundles F-actin to form higher-order structure, and stabilizes actin filaments in vitro. The mRNA is cell-to-cell mobile. | 32.22   | 16     | 2.01 | 2.99E-04 | 8.93E-04 |
| 4946 | 7 | F2-3 vs. S2-3 | 262684_s_a | AT1G76030 | Major facilitator superfamily protein;(source:Araport11)                                                                                                                                                                                                                                                                                                                                          | 405.15  | 201.12 | 2.01 | 5.20E-05 | 2.44E-04 |
| 4947 | 7 | F2-3 vs. S2-3 | 266993_at  | AT2G39210 | hypothetical protein;(source:Araport11)                                                                                                                                                                                                                                                                                                                                                           | 61.37   | 30.56  | 2.01 | 4.26E-04 | 1.17E-03 |
| 4948 | 7 | F2-3 vs. S2-3 | 251117_at  | AT3G63390 | Protein kinase superfamily protein;(source:Araport11)                                                                                                                                                                                                                                                                                                                                             | 250.96  | 124.76 | 2.01 | 5.49E-05 | 2.54E-04 |
| 4949 | 7 | F2-3 vs. S2-3 | 260835_at  | AT1G06700 | Encodes a H+/hexose cotransporter. The mRNA is cell-to-cell mobile.                                                                                                                                                                                                                                                                                                                               | 514.57  | 257.46 | 2    | 1.16E-04 | 4.36E-04 |
| 4950 | 7 | F2-3 vs. S2-3 | 262456_at  | AT1G11260 | HXXXD-type acyl-transferase family protein;(source:Araport11)                                                                                                                                                                                                                                                                                                                                     | 101.97  | 50.89  | 2    | 3.77E-04 | 1.07E-03 |
| 4951 | 7 | F2-3 vs. S2-3 | 263382_at  | AT2G40230 | Encodes the casein kinase II (CK2) catalytic subunit (alpha).                                                                                                                                                                                                                                                                                                                                     | 61.37   | 30.73  | 2    | 2.10E-04 | 6.84E-04 |
| 4952 | 7 | F2-3 vs. S2-3 | 252192_at  | AT3G50000 | saposin B domain-containing protein;(source:Araport11)                                                                                                                                                                                                                                                                                                                                            | 1040.38 | 521    | 2    | 1.28E-04 | 4.71E-04 |
| 4953 | 7 | F2-3 vs. S2-3 | 252075_at  | AT3G51730 | Oxidoreductase, zinc-binding dehydrogenase family protein;(source:Araport11)                                                                                                                                                                                                                                                                                                                      | 302.41  | 150.97 | 2    | 2.98E-05 | 1.61E-04 |
| 4954 | 7 | F2-3 vs. S2-3 | 254804_at  | AT4G13010 | RNA-binding KH domain-containing protein;(source:Araport11)                                                                                                                                                                                                                                                                                                                                       | 173.64  | 86.72  | 2    | 6.82E-05 | 2.93E-04 |
| 4955 | 7 | F2-3 vs. S2-3 | 247994_at  | AT5G56140 | DEA(D/H)-box RNA helicase family protein;(source:Araport11)                                                                                                                                                                                                                                                                                                                                       | 55.5    | 27.8   | 2    | 4.10E-04 | 1.14E-03 |
| 4956 | 7 | F2-3 vs. S2-3 | 247608_at  | AT5G60990 | The Arabidopsis P-type ATPase HMA5 is involved in Cu detoxification. hma5 mutant plants exhibit Cu hypersensitivity, which is especially dramatic in roots where HMA5 is mostly expressed.                                                                                                                                                                                                        | 119.48  | 59.69  | 2    | 1.91E-05 | 1.17E-04 |
| 4957 | 7 | F2-3 vs. S2-3 | 261551_at  | AT1G63440 | Molecular chaperone Hsp40/DnaJ family protein;(source:Araport11)                                                                                                                                                                                                                                                                                                                                  | 85.3    | 42.82  | 1.99 | 1.92E-04 | 6.38E-04 |
| 4958 | 7 | F2-3 vs. S2-3 | 262059_at  | AT1G80030 | Encodes an auxin glycosyltransferase that is likely to be involved in regulation of auxin by glycosylation.                                                                                                                                                                                                                                                                                       | 97.46   | 49.07  | 1.99 | 1.05E-04 | 4.05E-04 |
| 4959 | 7 | F2-3 vs. S2-3 | 263473_at  | AT2G31750 | Encodes glutathione transferase belonging to the phi class of GSTs. Naming convention according to Wagner et al. (2002).                                                                                                                                                                                                                                                                          | 34.46   | 17.29  | 1.99 | 1.66E-04 | 5.72E-04 |
| 4960 | 7 | F2-3 vs. S2-3 | 266461_at  | AT2G47730 | Encodes an actin that is constitutively expressed in vegetative structures but not pollen. ACT2 is involved in tip growth of root hairs.                                                                                                                                                                                                                                                          | 142.55  | 71.48  | 1.99 | 7.27E-05 | 3.07E-04 |
| 4961 | 7 | F2-3 vs. S2-3 | 257749_at  | AT3G18780 | Encodes a member of the phosphate starvation-induced glycerol-3-phosphate permease gene family: AT3G47420(G3Pp1), AT4G25220(G3Pp2), AT1G30560(G3Pp3), AT4G17550(G3Pp4) and AT2G13100(G3Pp5).                                                                                                                                                                                                      | 1215.07 | 610.16 | 1.99 | 3.34E-05 | 1.77E-04 |
| 4962 | 7 | F2-3 vs. S2-3 | 245427_at  | AT4G17550 | Plastid localized protein of unknown function. Mutants are more susceptible to P. syringae and produce less callose upon infection.                                                                                                                                                                                                                                                               | 91.43   | 45.92  | 1.99 | 7.08E-04 | 1.73E-03 |
| 4963 | 7 | F2-3 vs. S2-3 | 254103_at  | AT4G25030 | xylose isomerase family protein;(source:Araport11)                                                                                                                                                                                                                                                                                                                                                | 117.05  | 58.92  | 1.99 | 8.94E-05 | 3.60E-04 |
| 4964 | 7 | F2-3 vs. S2-3 | 247924_at  | AT5G57655 | Encodes one of four Arabidopsis phosphoenolpyruvate carboxylase proteins.Plays an important role in carbon and nitrogen metabolism.                                                                                                                                                                                                                                                               | 44.7    | 22.45  | 1.99 | 8.65E-04 | 2.03E-03 |
| 4965 | 7 | F2-3 vs. S2-3 | 260590_at  | AT1G53310 | A member of a protein family found in plants and animals that contain conserved C-terminal glutaredoxin-like and putative zinc-binding cysteine-rich domains. It is involved in light stimulated actin bundling and chloroplast movement. The mRNA is cell-to-cell mobile.                                                                                                                        | 1140.2  | 574.44 | 1.98 | 2.61E-04 | 8.01E-04 |
| 4966 | 7 | F2-3 vs. S2-3 | 261958_at  | AT1G64500 | hypothetical protein;(source:Araport11)                                                                                                                                                                                                                                                                                                                                                           | 26.61   | 13.44  | 1.98 | 2.40E-05 | 1.39E-04 |
| 4967 | 7 | F2-3 vs. S2-3 | 263282_at  | AT2G14095 | Proline-rich protein expressed in expanding leaves, stems, flowers, and siliques.                                                                                                                                                                                                                                                                                                                 | 23.36   | 11.81  | 1.98 | 3.24E-05 | 1.72E-04 |
| 4968 | 7 | F2-3 vs. S2-3 | 264007_at  | AT2G21140 | carboxyl-terminal peptidase (DUF239);(source:Araport11)                                                                                                                                                                                                                                                                                                                                           | 85.14   | 43.05  | 1.98 | 4.76E-04 | 1.27E-03 |
| 4969 | 7 | F2-3 vs. S2-3 | 267367_at  | AT2G44210 |                                                                                                                                                                                                                                                                                                                                                                                                   | 234.42  | 118.15 | 1.98 | 5.98E-04 | 1.52E-03 |

|      |   |               |           |           |                                                                                                                                                                                                                                                                                                                                                                                                                                                  |        |        |      |          |          |
|------|---|---------------|-----------|-----------|--------------------------------------------------------------------------------------------------------------------------------------------------------------------------------------------------------------------------------------------------------------------------------------------------------------------------------------------------------------------------------------------------------------------------------------------------|--------|--------|------|----------|----------|
|      |   |               |           |           | The gene encodes a 4-coumarate coenzyme A ligase being able to use sinapate as substrate. The catalytic efficiency was in the following (descending) order: p-coumaric acid, caffeic acid, 5-OH-ferulic acid, ferulic acid and sinapic acid. At4CL5 was unable to use cinnamic acid as substrate. Knockout of At4CL5 (4cl5) revealed no effect on syringyl lignin content indicating that the activity observed does probably not occur in vivo. | 90.51  | 45.69  | 1.98 | 5.08E-04 | 1.34E-03 |
| 4970 | 7 | F2-3 vs. S2-3 | 258037_at | AT3G21230 |                                                                                                                                                                                                                                                                                                                                                                                                                                                  |        |        |      |          |          |
| 4971 | 7 | F2-3 vs. S2-3 | 258183_at | AT3G21550 | transmembrane protein, putative (DUF679 domain membrane protein 2);(source:Araport11)                                                                                                                                                                                                                                                                                                                                                            | 59.11  | 29.88  | 1.98 | 1.43E-04 | 5.11E-04 |
| 4972 | 7 | F2-3 vs. S2-3 | 253215_at | AT4G34950 | Major facilitator superfamily protein;(source:Araport11)<br>ABC1K8 is a member of an atypical protein kinase family that is induced by heavy metals. Loss of function mutations affect the metabolic profile of chloroplast lipids. It appears to function along with ABC1K7 in mediating lipid membrane changes in response to stress. The mRNA is cell-to-cell mobile.                                                                         | 48.61  | 24.58  | 1.98 | 6.60E-05 | 2.86E-04 |
| 4973 | 7 | F2-3 vs. S2-3 | 247232_at | AT5G64940 | Encodes a VirE2-interacting protein. VIP1 mediates nuclear translocation of VirE2 via its amino half, and interacts with histone H2A via its carboxyl half. Involved in osmosensory response. The mRNA is cell-to-cell mobile.                                                                                                                                                                                                                   | 578.23 | 292.56 | 1.98 | 3.27E-04 | 9.53E-04 |
| 4974 | 7 | F2-3 vs. S2-3 | 260813_at | AT1G43700 | hypothetical protein;(source:Araport11)                                                                                                                                                                                                                                                                                                                                                                                                          | 377.17 | 191.56 | 1.97 | 6.10E-05 | 2.71E-04 |
| 4975 | 7 | F2-3 vs. S2-3 | 261687_at | AT1G47280 | UDP-Glycosyltransferase superfamily protein;(source:Araport11)                                                                                                                                                                                                                                                                                                                                                                                   | 18.87  | 9.59   | 1.97 | 3.44E-04 | 9.92E-04 |
| 4976 | 7 | F2-3 vs. S2-3 | 263477_at | AT2G31790 | Encodes a thylakoid membrane protein involved in the accumulation of the cytochrome b6/f complex.                                                                                                                                                                                                                                                                                                                                                | 216.19 | 109.8  | 1.97 | 3.90E-05 | 1.97E-04 |
| 4977 | 7 | F2-3 vs. S2-3 | 258161_at | AT3G17930 | tonoplast monosaccharide transporter3;(source:Araport11)                                                                                                                                                                                                                                                                                                                                                                                         | 104.65 | 53.18  | 1.97 | 1.85E-04 | 6.23E-04 |
| 4978 | 7 | F2-3 vs. S2-3 | 252107_at | AT3G51490 | ABC-2 type transporter family protein;(source:Araport11)                                                                                                                                                                                                                                                                                                                                                                                         | 58.61  | 29.82  | 1.97 | 2.36E-04 | 7.43E-04 |
| 4979 | 7 | F2-3 vs. S2-3 | 251825_at | AT3G55100 | Adenine nucleotide alpha hydrolases-like superfamily protein;(source:Araport11)                                                                                                                                                                                                                                                                                                                                                                  | 28.38  | 14.41  | 1.97 | 3.07E-05 | 1.66E-04 |
| 4980 | 7 | F2-3 vs. S2-3 | 254775_at | AT4G13450 | Belongs to the Raf-like kinase subfamily of the mitogen-activated protein kinase kinase kinase (MAPKKK) family. Negatively regulates stomatal opening by negatively regulating plasma membrane H <sup>+</sup> -ATPase phosphorylation.                                                                                                                                                                                                           | 23.46  | 11.92  | 1.97 | 8.08E-04 | 1.92E-03 |
| 4981 | 7 | F2-3 vs. S2-3 | 248529_at | AT5G50000 | Encodes a polypeptide that contains FCPH and BRCT domains. RNAi suppression mutant lines were generated, which displayed a range of phenotypic abnormalities, including: incomplete to no cotyledon expansion, slow growth, epinastic leaves or small inflorescences.                                                                                                                                                                            | 164.08 | 83.37  | 1.97 | 1.50E-04 | 5.31E-04 |
| 4982 | 7 | F2-3 vs. S2-3 | 247894_at | AT5G58003 | Galactose oxidase/kelch repeat superfamily protein;(source:Araport11)                                                                                                                                                                                                                                                                                                                                                                            | 87.61  | 44.53  | 1.97 | 7.34E-05 | 3.09E-04 |
| 4983 | 7 | F2-3 vs. S2-3 | 261525_at | AT1G14330 | Coatomer, beta subunit;(source:Araport11)                                                                                                                                                                                                                                                                                                                                                                                                        | 193.32 | 98.7   | 1.96 | 2.38E-04 | 7.46E-04 |
| 4984 | 7 | F2-3 vs. S2-3 | 259638_at | AT1G52360 | Matrixin family protein;(source:Araport11)                                                                                                                                                                                                                                                                                                                                                                                                       | 212.82 | 108.8  | 1.96 | 5.71E-04 | 1.47E-03 |
| 4985 | 7 | F2-3 vs. S2-3 | 263731_at | AT1G59970 | PATATIN-like protein 6;(source:Araport11)                                                                                                                                                                                                                                                                                                                                                                                                        | 66.65  | 34.03  | 1.96 | 9.94E-05 | 3.91E-04 |
| 4986 | 7 | F2-3 vs. S2-3 | 267012_at | AT2G39220 | AAA-type ATPase family protein / ankyrin repeat family protein;(source:Araport11)                                                                                                                                                                                                                                                                                                                                                                | 373.89 | 190.71 | 1.96 | 6.28E-05 | 2.77E-04 |
| 4987 | 7 | F2-3 vs. S2-3 | 258134_at | AT3G24530 |                                                                                                                                                                                                                                                                                                                                                                                                                                                  | 63.51  | 32.39  | 1.96 | 4.79E-04 | 1.28E-03 |
| 4988 | 7 | F2-3 vs. S2-3 | 246198_at | AT4G36810 | Encodes a protein with geranylgeranyl pyrophosphate synthase activity involved in isoprenoid biosynthesis. The enzyme appears to be targeted to the chloroplast in epidermal cells and guard cells of leaves, and in etioplasts in roots. The mRNA is cell-to-cell mobile.                                                                                                                                                                       | 73.99  | 37.75  | 1.96 | 4.46E-05 | 2.18E-04 |
| 4989 | 7 | F2-3 vs. S2-3 | 250547_at | AT5G08100 | Encodes an asparaginase that catalyzes the degradation of L-asparagine to L-aspartic acid and ammonia.                                                                                                                                                                                                                                                                                                                                           | 124    | 63.36  | 1.96 | 7.85E-05 | 3.27E-04 |
| 4990 | 7 | F2-3 vs. S2-3 | 249447_at | AT5G39400 | Calcium/lipid-binding (CaLB) phosphatase;(source:Araport11)                                                                                                                                                                                                                                                                                                                                                                                      | 24.29  | 12.38  | 1.96 | 5.38E-04 | 1.40E-03 |
| 4991 | 7 | F2-3 vs. S2-3 | 247944_at | AT5G57100 | Nucleotide/sugar transporter family protein;(source:Araport11)                                                                                                                                                                                                                                                                                                                                                                                   | 75.3   | 38.51  | 1.96 | 2.78E-04 | 8.40E-04 |
| 4992 | 7 | F2-3 vs. S2-3 | 247060_at | AT5G66760 | One of two genes in Arabidopsis that encode a flavoprotein subunit of the mitochondrial succinate dehydrogenase complex. The mRNA is cell-to-cell mobile.                                                                                                                                                                                                                                                                                        | 943.73 | 481.74 | 1.96 | 8.80E-04 | 2.06E-03 |
| 4993 | 7 | F2-3 vs. S2-3 | 265067_at | AT1G03850 | Encodes glutaredoxin ATGRXS13, required to facilitate Botrytis cinerea infection of Arabidopsis thaliana plants. Sylvain La Camera et al (2011, PMID:21756272) reported a third splice variant in addition to the two annotated in TAIR10. It is a member of the CC-type glutaredoxin (ROXY) family that has been shown to interact with the transcription factor TGA2 and suppress ORA59 promoter activity.                                     | 21.31  | 10.91  | 1.95 | 2.35E-04 | 7.40E-04 |
| 4994 | 7 | F2-3 vs. S2-3 | 261206_at | AT1G12800 | SDP is a chloroplast localized RNA binding protein that is required for plastid rRNA processing. Plants harboring a mutation in SDP have numerous defects including reduced chlorophyll content, poor growth, yellow leaves and abnormal chloroplasts.                                                                                                                                                                                           | 389.18 | 199.24 | 1.95 | 2.79E-04 | 8.42E-04 |
| 4995 | 7 | F2-3 vs. S2-3 | 259491_at | AT1G15820 | Lhcb6 protein (Lhcb6), light harvesting complex of photosystem II.                                                                                                                                                                                                                                                                                                                                                                               | 636.25 | 326.88 | 1.95 | 3.54E-05 | 1.84E-04 |

|      |   |               |           |           |                                                                                                                                                                                                                                                                                                                                                                                                                                                                                                            |        |        |      |          |          |
|------|---|---------------|-----------|-----------|------------------------------------------------------------------------------------------------------------------------------------------------------------------------------------------------------------------------------------------------------------------------------------------------------------------------------------------------------------------------------------------------------------------------------------------------------------------------------------------------------------|--------|--------|------|----------|----------|
|      |   |               |           |           | PAM71 encodes an integral thylakoid membrane protein that is required for normal operation of oxygen-evolving complex (as evidenced by oxygen evolution rates) and for manganese incorporation. PAM71 belongs to a small gene family in Arabidopsis comprising five members. PAM71 is well conserved in the green lineage and shares homology with putative Ca <sup>2+</sup> /H <sup>+</sup> exchangers from yeast ( <i>Saccharomyces cerevisiae</i> ) (GDT1) and human ( <i>Homo sapiens</i> ) (TMEM165). | 56.24  | 28.89  | 1.95 | 6.68E-05 | 2.88E-04 |
| 4996 | 7 | F2-3 vs. S2-3 | 262342_at | AT1G64150 |                                                                                                                                                                                                                                                                                                                                                                                                                                                                                                            | 111.03 | 56.79  | 1.95 | 4.57E-04 | 1.23E-03 |
| 4997 | 7 | F2-3 vs. S2-3 | 263553_at | AT2G16430 | Encodes an acid phosphatase involved plant acclimation to Pi deprivation.                                                                                                                                                                                                                                                                                                                                                                                                                                  |        |        |      |          |          |
| 4998 | 7 | F2-3 vs. S2-3 | 257267_at | AT3G15030 | Arabidopsis thaliana TCP family transcription factor. Regulated by miR319. Involved in heterochronic regulation of leaf differentiation.                                                                                                                                                                                                                                                                                                                                                                   | 64     | 32.81  | 1.95 | 7.32E-04 | 1.77E-03 |
| 4999 | 7 | F2-3 vs. S2-3 | 258033_at | AT3G21250 | member of MRP subfamily                                                                                                                                                                                                                                                                                                                                                                                                                                                                                    | 168.68 | 86.69  | 1.95 | 9.35E-04 | 2.17E-03 |
|      |   |               |           |           | Transcriptional activator that binds to the DRE/CRT regulatory element and induces COR (cold-regulated) gene expression increasing plant freezing tolerance. It encodes a member of the DREB subfamily A-1 of ERF/AP2 transcription factor family (CBF1). The protein contains one AP2 domain. There are six members in this subfamily, including CBF1, CBF2, and CBF3. This gene is involved in response to low temperature and abscisic acid.                                                            |        |        |      |          |          |
| 5000 | 7 | F2-3 vs. S2-3 | 254074_at | AT4G25490 |                                                                                                                                                                                                                                                                                                                                                                                                                                                                                                            | 69.77  | 35.76  | 1.95 | 6.31E-04 | 1.58E-03 |
|      |   |               |           |           | Encodes a multitransmembrane hydrophobic protein that functions as transporter of UDP-galactose and UDP-glucose into the Golgi. Localized in the ER. Involved in the unfolded protein response, a mechanism that controls proper protein folding in the ER.                                                                                                                                                                                                                                                | 116.85 | 60.19  | 1.94 | 6.29E-05 | 2.77E-04 |
| 5001 | 7 | F2-3 vs. S2-3 | 267483_at | AT2G02810 | Thioredoxin superfamily protein;(source:Araport11)                                                                                                                                                                                                                                                                                                                                                                                                                                                         | 88.45  | 45.66  | 1.94 | 3.90E-04 | 1.10E-03 |
| 5002 | 7 | F2-3 vs. S2-3 | 265959_at | AT2G37240 | Encodes MRI, a plasma membrane-localized member of the RLCK-VIII subfamily. Preferentially expressed in both pollen tubes and root hairs. mri-knockout mutants display spontaneous pollen tube and root-hair bursting.                                                                                                                                                                                                                                                                                     |        |        |      |          |          |
| 5003 | 7 | F2-3 vs. S2-3 | 267582_at | AT2G41970 | Identified in a screen for mutants resistant to an anti-auxin. Encodes a protein with unknown function that shares homology with DCN protein family.                                                                                                                                                                                                                                                                                                                                                       | 34.56  | 17.8   | 1.94 | 4.06E-04 | 1.13E-03 |
| 5004 | 7 | F2-3 vs. S2-3 | 258057_at | AT3G28970 | Encodes HDA9 (a RPD3-like histone deacetylase). Functions in promoting the onset of leaf senescence.The hda9 mutant shows enhanced H3K9 acetylation levels,based on immunodetection using H3K9ac antibodies.                                                                                                                                                                                                                                                                                               | 92.19  | 47.48  | 1.94 | 9.18E-05 | 3.67E-04 |
| 5005 | 7 | F2-3 vs. S2-3 | 252649_at | AT3G44680 | AtRabD2c encodes a Rab GTPase, which plays important roles in pollen development, germination and tube elongation.                                                                                                                                                                                                                                                                                                                                                                                         | 56.04  | 28.87  | 1.94 | 1.67E-04 | 5.75E-04 |
| 5006 | 7 | F2-3 vs. S2-3 | 245299_at | AT4G17530 |                                                                                                                                                                                                                                                                                                                                                                                                                                                                                                            | 221.04 | 114.1  | 1.94 | 2.62E-05 | 1.48E-04 |
|      |   |               |           |           | Encodes a chloroplast-localized protein that modulates cytoplasmic Ca <sup>2+</sup> concentration and is crucial for proper stomatal regulation in response to elevations of external Ca <sup>2+</sup> . Phosphorylation of this protein is dependent on calcium.                                                                                                                                                                                                                                          | 117.1  | 60.41  | 1.94 | 4.15E-04 | 1.15E-03 |
| 5007 | 7 | F2-3 vs. S2-3 | 249876_at | AT5G23060 | CYS, MET, PRO, and GLY protein 2;(source:Araport11)                                                                                                                                                                                                                                                                                                                                                                                                                                                        | 31.63  | 16.33  | 1.94 | 2.66E-05 | 1.49E-04 |
| 5008 | 7 | F2-3 vs. S2-3 | 247240_at | AT5G64660 |                                                                                                                                                                                                                                                                                                                                                                                                                                                                                                            |        |        |      |          |          |
| 5009 | 7 | F2-3 vs. S2-3 | 262960_at | AT1G54320 | LEM3 (ligand-effect modulator 3) family protein / CDC50 family protein;(source:Araport11)                                                                                                                                                                                                                                                                                                                                                                                                                  | 531.94 | 275.76 | 1.93 | 6.58E-05 | 2.86E-04 |
| 5010 | 7 | F2-3 vs. S2-3 | 265392_at | AT2G20860 | LIP1,Lipoic acid synthase,                                                                                                                                                                                                                                                                                                                                                                                                                                                                                 | 101.26 | 52.43  | 1.93 | 1.53E-04 | 5.38E-04 |
|      |   |               |           |           | Predicted to encode a PR (pathogenesis-related) protein. Belongs to the lipid transfer protein (PR-14) family with the following members: At2g38540/LTP1, At2g38530/LTP2, At5g59320/LTP3, At5g59310/LTP4, At3g51600/LTP5, At3g08770/LTP6, At2g15050/LTP7, At2g18370/LTP8, At2g15325/LTP9, At5g01870/LTP10, At4g33355/LTP11, At3g51590/LTP12, At5g44265/LTP13, At5g62065/LTP14, At4g08530/LTP15.                                                                                                            | 35.59  | 18.45  | 1.93 | 5.43E-05 | 2.52E-04 |
| 5011 | 7 | F2-3 vs. S2-3 | 252115_at | AT3G51600 | Encodes a member of the CYP81F cytochrome P450 monooxygenase subfamily.                                                                                                                                                                                                                                                                                                                                                                                                                                    | 78.18  | 40.56  | 1.93 | 3.81E-04 | 1.07E-03 |
| 5012 | 7 | F2-3 vs. S2-3 | 253101_at | AT4G37430 | Lung seven transmembrane receptor family protein;(source:Araport11)                                                                                                                                                                                                                                                                                                                                                                                                                                        | 192.28 | 99.57  | 1.93 | 1.09E-04 | 4.16E-04 |
| 5013 | 7 | F2-3 vs. S2-3 | 249229_at | AT5G42090 | Golgi SNARE 11 protein (GOS11)                                                                                                                                                                                                                                                                                                                                                                                                                                                                             | 559.98 | 291.7  | 1.92 | 1.17E-04 | 4.39E-04 |
| 5014 | 7 | F2-3 vs. S2-3 | 259498_at | AT1G15880 | Galactose oxidase/kelch repeat superfamily protein;(source:Araport11)                                                                                                                                                                                                                                                                                                                                                                                                                                      | 77.8   | 40.58  | 1.92 | 8.33E-05 | 3.41E-04 |
| 5015 | 7 | F2-3 vs. S2-3 | 264229_at | AT1G67480 | Mo25 family protein;(source:Araport11)                                                                                                                                                                                                                                                                                                                                                                                                                                                                     | 19.94  | 10.38  | 1.92 | 2.12E-04 | 6.88E-04 |
| 5016 | 7 | F2-3 vs. S2-3 | 265705_at | AT2G03410 | Class I glutamine amidotransferase-like superfamily protein;(source:Araport11)                                                                                                                                                                                                                                                                                                                                                                                                                             | 23.74  | 12.36  | 1.92 | 4.80E-04 | 1.28E-03 |
| 5017 | 7 | F2-3 vs. S2-3 | 266562_at | AT2G23970 | Galactose oxidase/kelch repeat superfamily protein;(source:Araport11)                                                                                                                                                                                                                                                                                                                                                                                                                                      | 33.19  | 17.27  | 1.92 | 3.31E-04 | 9.63E-04 |
| 5018 | 7 | F2-3 vs. S2-3 | 263796_at | AT2G24540 | nucleolar protein gar2-like protein;(source:Araport11)                                                                                                                                                                                                                                                                                                                                                                                                                                                     | 287.72 | 150.14 | 1.92 | 3.08E-04 | 9.12E-04 |
| 5019 | 7 | F2-3 vs. S2-3 | 265884_at | AT2G42320 |                                                                                                                                                                                                                                                                                                                                                                                                                                                                                                            |        |        |      |          |          |

|      |   |               |           |           |                                                                                                                                                                                                                                                                                                                                                                                                                                                                                                                                                                                                                                                                                         |         |        |      |          |          |
|------|---|---------------|-----------|-----------|-----------------------------------------------------------------------------------------------------------------------------------------------------------------------------------------------------------------------------------------------------------------------------------------------------------------------------------------------------------------------------------------------------------------------------------------------------------------------------------------------------------------------------------------------------------------------------------------------------------------------------------------------------------------------------------------|---------|--------|------|----------|----------|
| 5020 | 7 | F2-3 vs. S2-3 | 245335_at | AT4G16160 | Homologous to pea OEP16 and barley pPORA (OEP16), a member of Arabidopsis OEP16 family. Two OEP16 genes are closely related to each other and are conserved in all land plants, OEP16-2, also named OEP16-S, and OEP16-1 (renamed OEP16-L) are result of the gene duplication event that occurred prior to divergence of bryophytes and seed plants. Predominantly expressed in seed and is not inducible by cold treatment. atOEP16-S gained an additional exon. The promoter region of atOEP16-S (but not atOEP16-L) contains multiple G-box ABA-responsive elements. The atOEP16-S promoter conferred developmentally regulated seed- and pollen-specific GUS expression in tobacco. | 24.27   | 12.67  | 1.92 | 4.38E-04 | 1.19E-03 |
| 5021 | 7 | F2-3 vs. S2-3 | 254299_at | AT4G22920 | Similar to the tomato senescence-inducible chloroplast stay-green protein 1. It is upregulated during maximal senescence in the Arabidopsis life cycle, especially in senescent leaves. Acts antagonistically with SGR2 to balance chlorophyll catabolism in chloroplasts with the dismantling and remobilizing of other cellular components in senescing leaf cells.                                                                                                                                                                                                                                                                                                                   | 68.54   | 35.65  | 1.92 | 5.36E-05 | 2.49E-04 |
| 5022 | 7 | F2-3 vs. S2-3 | 255940_at | AT1G20380 | Prolyl oligopeptidase family protein;(source:Araport11)                                                                                                                                                                                                                                                                                                                                                                                                                                                                                                                                                                                                                                 | 158.33  | 82.8   | 1.91 | 3.32E-04 | 9.65E-04 |
| 5023 | 7 | F2-3 vs. S2-3 | 260322_at | AT1G63900 | Encodes a RING-type ubiquitin E3 ligase of the chloroplast outer membrane that associates with TOC complexes and mediates ubiquitination of TOC components, promoting their degradation. It not only regulates chloroplast protein import but also targets components of the peroxisome protein import apparatus, PEX13 in particular. Several studies have been done to examine the peroxisomal localization of this protein, with varying interpretations.                                                                                                                                                                                                                            | 130.4   | 68.35  | 1.91 | 1.75E-04 | 5.95E-04 |
| 5024 | 7 | F2-3 vs. S2-3 | 255855_at | AT1G66950 | Encodes a plasma membrane-localized ABC transporter. Confers tolerance to herbicide paraquat.                                                                                                                                                                                                                                                                                                                                                                                                                                                                                                                                                                                           | 53.77   | 28.16  | 1.91 | 3.13E-04 | 9.23E-04 |
| 5025 | 7 | F2-3 vs. S2-3 | 263835_at | AT2G40290 | Encodes an eIF2alpha homolog that can be phosphorylated by GCN2 in vitro.                                                                                                                                                                                                                                                                                                                                                                                                                                                                                                                                                                                                               | 225.32  | 117.87 | 1.91 | 7.04E-05 | 2.99E-04 |
| 5026 | 7 | F2-3 vs. S2-3 | 267212_at | AT2G44060 | Late embryogenesis abundant protein, group 2;(source:Araport11)                                                                                                                                                                                                                                                                                                                                                                                                                                                                                                                                                                                                                         | 546.74  | 286.81 | 1.91 | 1.53E-04 | 5.41E-04 |
| 5027 | 7 | F2-3 vs. S2-3 | 257252_at | AT3G24170 | Encodes a cytosolic glutathione reductase.                                                                                                                                                                                                                                                                                                                                                                                                                                                                                                                                                                                                                                              | 304.97  | 159.61 | 1.91 | 3.73E-04 | 1.06E-03 |
| 5028 | 7 | F2-3 vs. S2-3 | 251961_at | AT3G53620 | Encodes a soluble protein with inorganic pyrophosphatase activity that is highly specific for Mg-inorganic pyrophosphate. The mRNA is cell-to-cell mobile.                                                                                                                                                                                                                                                                                                                                                                                                                                                                                                                              | 224.88  | 117.46 | 1.91 | 7.17E-05 | 3.04E-04 |
| 5029 | 7 | F2-3 vs. S2-3 | 253525_at | AT4G31330 | transmembrane protein, putative (Protein of unknown function, DUF599);(source:Araport11)                                                                                                                                                                                                                                                                                                                                                                                                                                                                                                                                                                                                | 37.77   | 19.76  | 1.91 | 5.79E-05 | 2.63E-04 |
| 5030 | 7 | F2-3 vs. S2-3 | 250889_at | AT5G04500 | Encodes a member of the CAZy Glycosyltransferase Family 64 that is involved in glycosylinositolphosphorylceramide and sphingolipid glycosylation. In mutants, seed germination was less sensitive to salt stress than in wild-type plants. [The protein was expected to be Golgi-localized based on function as well as the Golgi localization of its homolog GMT1. However, GFP-fusion proteins localized both to the ER and Golgi, and especially to ER when co-expressed with Golgi markers. Therefore, localization cannot confidently be defined. (pers. communication, J. Mortimer)]                                                                                              | 71.76   | 37.64  | 1.91 | 1.55E-04 | 5.45E-04 |
| 5031 | 7 | F2-3 vs. S2-3 | 245854_at | AT5G13490 | Encodes mitochondrial ADP/ATP carrier                                                                                                                                                                                                                                                                                                                                                                                                                                                                                                                                                                                                                                                   | 1048.03 | 547.92 | 1.91 | 1.66E-04 | 5.73E-04 |
| 5032 | 7 | F2-3 vs. S2-3 | 264355_at | AT1G03210 | Phenazine biosynthesis PhzC/PhzF protein;(source:Araport11)                                                                                                                                                                                                                                                                                                                                                                                                                                                                                                                                                                                                                             | 92.57   | 48.69  | 1.9  | 5.40E-05 | 2.51E-04 |
| 5033 | 7 | F2-3 vs. S2-3 | 259626_at | AT1G42990 | bZIP60 consists of a bZIP DNA binding domain followed by a putative transmembrane domain. bZIP60 mRNA is upregulated by the addition of ER stress inducers, tunicamycin (inhibitor of N-linked glycosylation), DTT (inhibitor of disulfide bond formation) and azetin-2-carboxylate (proline analog perturbing protein structure). Upon ER stress, bZIP60 mRNA is spliced by IRE1A and IRE1B to produce bZIP60-S, an active transcription factor without the transmembrane domain. bZIP60-U, a product of unspliced form of bZIP60 mRNA, is localized at the ER membrane and bZIP60-S is localized in the nucleus.                                                                      | 73.52   | 38.77  | 1.9  | 8.40E-04 | 1.98E-03 |
| 5034 | 7 | F2-3 vs. S2-3 | 260518_at | AT1G51410 | similar to Eucalyptus gunnii alcohol dehydrogenase of unknown physiological function (GI:1143445), apple tree, PIR:T16995; NOT a cinnamyl-alcohol dehydrogenase                                                                                                                                                                                                                                                                                                                                                                                                                                                                                                                         | 37.49   | 19.68  | 1.9  | 3.91E-05 | 1.98E-04 |
| 5035 | 7 | F2-3 vs. S2-3 | 265446_at | AT2G37110 | PLAC8 family protein;(source:Araport11)                                                                                                                                                                                                                                                                                                                                                                                                                                                                                                                                                                                                                                                 | 1525.52 | 801.47 | 1.9  | 5.73E-05 | 2.61E-04 |
| 5036 | 7 | F2-3 vs. S2-3 | 265471_at | AT2G37130 | Peroxidase superfamily protein;(source:Araport11)<br>One of three isoforms of the iron-sulfur component of the succinate dehydrogenase complex, a component of the mitochondrial respiratory chain complex II. The product of the nuclear encoded gene is imported into the mitochondrion. Expressed during germination and post-germinative growth.                                                                                                                                                                                                                                                                                                                                    | 23.1    | 12.16  | 1.9  | 5.03E-04 | 1.33E-03 |
| 5037 | 7 | F2-3 vs. S2-3 | 257713_at | AT3G27380 |                                                                                                                                                                                                                                                                                                                                                                                                                                                                                                                                                                                                                                                                                         | 588.9   | 310.53 | 1.9  | 2.02E-04 | 6.66E-04 |

|      |   |               |            |           |                                                                                                                                                                                                                                                                                                                                                                                                                                                                                                                           |         |         |      |          |          |
|------|---|---------------|------------|-----------|---------------------------------------------------------------------------------------------------------------------------------------------------------------------------------------------------------------------------------------------------------------------------------------------------------------------------------------------------------------------------------------------------------------------------------------------------------------------------------------------------------------------------|---------|---------|------|----------|----------|
| 5038 | 7 | F2-3 vs. S2-3 | 252105_at  | AT3G51470 | Protein phosphatase 2C family protein;(source:Araport11)                                                                                                                                                                                                                                                                                                                                                                                                                                                                  | 30.59   | 16.07   | 1.9  | 1.74E-04 | 5.94E-04 |
| 5039 | 7 | F2-3 vs. S2-3 | 255717_at  | AT4G00350 | MATE efflux family protein;(source:Araport11)                                                                                                                                                                                                                                                                                                                                                                                                                                                                             | 29.23   | 15.38   | 1.9  | 2.31E-04 | 7.33E-04 |
| 5040 | 7 | F2-3 vs. S2-3 | 253736_at  | AT4G28780 | GDSL-motif esterase/acyltransferase/lipase. Enzyme group with broad substrate specificity that may catalyze acyltransfer or hydrolase reactions with lipid and non-lipid substrates.                                                                                                                                                                                                                                                                                                                                      | 49.87   | 26.29   | 1.9  | 6.17E-05 | 2.74E-04 |
| 5041 | 7 | F2-3 vs. S2-3 | 253321_at  | AT4G33910 | 2-oxoglutarate (2OG) and Fe(II)-dependent oxygenase superfamily protein;(source:Araport11)                                                                                                                                                                                                                                                                                                                                                                                                                                | 149.68  | 78.63   | 1.9  | 2.24E-04 | 7.16E-04 |
| 5042 | 7 | F2-3 vs. S2-3 | 245895_at  | AT5G09230 | Encodes SRT2, a member of the SIR2 (sirtuin) family HDAC (histone deacetylase) (SRT1/AT5g55760, SRT2/AT5G09230).                                                                                                                                                                                                                                                                                                                                                                                                          | 95.59   | 50.22   | 1.9  | 7.17E-04 | 1.75E-03 |
| 5043 | 7 | F2-3 vs. S2-3 | 246832_at  | AT5G26600 | Pyridoxal phosphate (PLP)-dependent transferases superfamily protein;(source:Araport11)                                                                                                                                                                                                                                                                                                                                                                                                                                   | 407.58  | 214.02  | 1.9  | 4.49E-05 | 2.19E-04 |
| 5044 | 7 | F2-3 vs. S2-3 | 246660_at  | AT5G35180 | ENHANCED DISEASE RESISTANCE protein (DUF1336);(source:Araport11)                                                                                                                                                                                                                                                                                                                                                                                                                                                          | 210.74  | 110.94  | 1.9  | 1.65E-04 | 5.71E-04 |
| 5045 | 7 | F2-3 vs. S2-3 | 257090_at  | AT3G20530 | Protein kinase superfamily protein, expressed in the peroxisome.<br>Encodes a member of the CC-type glutaredoxin (ROXY) family that has been shown to interact with the transcription factor TGA2.                                                                                                                                                                                                                                                                                                                        | 55.98   | 29.69   | 1.89 | 4.67E-05 | 2.26E-04 |
| 5046 | 7 | F2-3 vs. S2-3 | 251197_at  | AT3G62960 | potassium transporter                                                                                                                                                                                                                                                                                                                                                                                                                                                                                                     | 37.31   | 19.7    | 1.89 | 5.36E-04 | 1.40E-03 |
| 5047 | 7 | F2-3 vs. S2-3 | 253330_at  | AT4G33530 | Encodes a cellulose synthase isomer. CESA3 mutants have cellulose defect in the primary cell wall. Multiple lines of evidence suggest that CESA3, along with CESA1 and CESA6 are present in the same plasma membrane complex for cellulose biosynthesis. As inferred from the null role of secondary wall-type CesAs, included in a set of five primary wall-type CesAs that may support trichome cell wall thickening. The xylem cells in primary root have reduced cell expansion and higher than normal lignification. | 73.79   | 39.13   | 1.89 | 4.16E-04 | 1.15E-03 |
| 5048 | 7 | F2-3 vs. S2-3 | 250827_at  | AT5G05170 | Adenosylmethionine decarboxylase family protein;(source:Araport11)                                                                                                                                                                                                                                                                                                                                                                                                                                                        | 1204.63 | 636.25  | 1.89 | 1.82E-04 | 6.14E-04 |
| 5049 | 7 | F2-3 vs. S2-3 | 246490_at  | AT5G15950 | Encodes a member of the Rubisco small subunit (RBCS) multigene family: RBCS1A (At1g67090), RBCS1B (At5g38430), RBCS2B (At5g38420), and RBCS3B (At5g38410). Activated by OXS2 under the treatment of salt.                                                                                                                                                                                                                                                                                                                 | 338.42  | 178.61  | 1.89 | 2.51E-04 | 7.75E-04 |
| 5050 | 7 | F2-3 vs. S2-3 | 264474_s_a | AT5G38420 | Leucine-rich repeat protein kinase family protein;(source:Araport11)                                                                                                                                                                                                                                                                                                                                                                                                                                                      | 16542.4 | 8760.31 | 1.89 | 5.76E-04 | 1.48E-03 |
| 5051 | 7 | F2-3 vs. S2-3 | 261875_at  | AT1G50610 | Encodes a plasma membrane localized ABC transporter involved in abscisic acid transport and responses.                                                                                                                                                                                                                                                                                                                                                                                                                    | 23.16   | 12.32   | 1.88 | 6.89E-04 | 1.70E-03 |
| 5052 | 7 | F2-3 vs. S2-3 | 260144_at  | AT1G71960 | pectin methylesterase 44;(source:Araport11)                                                                                                                                                                                                                                                                                                                                                                                                                                                                               | 59.52   | 31.68   | 1.88 | 2.83E-04 | 8.51E-04 |
| 5053 | 7 | F2-3 vs. S2-3 | 253372_at  | AT4G33220 | DUF793 domain containing protein. Expression is induced by cold. Loss of function mutations are more sensitive to freezing and have reduced levels of CBFs. May act by preventing degradation of CBFs.                                                                                                                                                                                                                                                                                                                    | 268.14  | 142.77  | 1.88 | 6.66E-04 | 1.65E-03 |
| 5054 | 7 | F2-3 vs. S2-3 | 261405_at  | AT1G18740 | Encodes a member of the TBL (TRICHOME BIREFRINGENCE-LIKE) gene family containing a plant-specific DUF231 (domain of unknown function) domain. TBL gene family has 46 members, two of which (TBR/AT5G06700 and TBL3/AT5G01360) have been shown to be involved in the synthesis and deposition of secondary wall cellulose, presumably by influencing the esterification state of pectic polymers. A nomenclature for this gene family has been proposed (Volker Bischoff & Wolf Scheible, 2010, personal communication).   | 713.93  | 381.46  | 1.87 | 3.21E-04 | 9.42E-04 |
| 5055 | 7 | F2-3 vs. S2-3 | 260840_at  | AT1G29050 | Encodes a member of NAP subfamily of transporters. Mutations in this gene suppress the low temperature-induced phenotype of Arabidopsis tocopherol-deficient mutant vte2.                                                                                                                                                                                                                                                                                                                                                 | 57.68   | 30.77   | 1.87 | 5.15E-04 | 1.36E-03 |
| 5056 | 7 | F2-3 vs. S2-3 | 264165_at  | AT1G65410 | Calcium-binding EF-hand family protein;(source:Araport11)                                                                                                                                                                                                                                                                                                                                                                                                                                                                 | 155.05  | 83      | 1.87 | 8.34E-04 | 1.97E-03 |
| 5057 | 7 | F2-3 vs. S2-3 | 266371_at  | AT2G41410 | Phosphoinositide kinase which undergo autophosphorylation and phosphorylate serine/threonine residues of protein substrates. Contains phosphoinositide 3/4-kinase and ubiquitin-like domains.                                                                                                                                                                                                                                                                                                                             | 62.46   | 33.32   | 1.87 | 9.82E-04 | 2.26E-03 |
| 5058 | 7 | F2-3 vs. S2-3 | 265461_at  | AT2G46500 | Phosphorylates PUF1D and RPN10 in vitro.                                                                                                                                                                                                                                                                                                                                                                                                                                                                                  | 72.08   | 38.54   | 1.87 | 9.44E-04 | 2.18E-03 |
| 5059 | 7 | F2-3 vs. S2-3 | 258889_at  | AT3G05610 | Plant invertase/pectin methylesterase inhibitor superfamily;(source:Araport11)                                                                                                                                                                                                                                                                                                                                                                                                                                            | 18.94   | 10.11   | 1.87 | 4.26E-04 | 1.17E-03 |
| 5060 | 7 | F2-3 vs. S2-3 | 256266_at  | AT3G12320 | hypothetical protein;(source:Araport11)                                                                                                                                                                                                                                                                                                                                                                                                                                                                                   | 64.27   | 34.45   | 1.87 | 1.71E-04 | 5.84E-04 |
| 5061 | 7 | F2-3 vs. S2-3 | 250130_at  | AT5G16510 | RGP5 is a member of the reversably-glycosylated family of proteins. Analyses using tagged RGP5 suggest that it is present in the cytosol and in association with the Golgi apparatus. Recombinant RGP5 does not have UDP-arabinose mutase activity based on an in vitro assay even though the related RGP1, RGP2, and RGP3 proteins do have activity in the same assay. RGP5 can form complexes with RGP1 and RGP2.                                                                                                       | 205.13  | 109.73  | 1.87 | 3.79E-05 | 1.94E-04 |
| 5062 | 7 | F2-3 vs. S2-3 | 249397_at  | AT5G40230 | nodulin MtN21-like transporter family protein                                                                                                                                                                                                                                                                                                                                                                                                                                                                             | 44.04   | 23.59   | 1.87 | 1.06E-04 | 4.09E-04 |



|      |   |               |            |           |                                                                                                                                                                                                                                                                                                                                                                                                                                                                                                                         |         |         |      |          |          |
|------|---|---------------|------------|-----------|-------------------------------------------------------------------------------------------------------------------------------------------------------------------------------------------------------------------------------------------------------------------------------------------------------------------------------------------------------------------------------------------------------------------------------------------------------------------------------------------------------------------------|---------|---------|------|----------|----------|
| 5063 | 7 | F2-3 vs. S2-3 | 249327_at  | AT5G40890 | Encodes a member of the voltage-dependent chloride channel. Also functions as a NO <sub>3</sub> ⁻/H⁺ exchanger that serves to accumulate nitrate nutrient in vacuoles. Mutants homozygous for the T-DNA insertion mutation have reduced nitrate uptake capacity in high nitrate environment and exhibit hypersensitivity to chlorate.                                                                                                                                                                                   | 99.27   | 53.03   | 1.87 | 7.99E-04 | 1.90E-03 |
| 5064 | 7 | F2-3 vs. S2-3 | 255719_at  | AT1G32080 | Encodes a plant LrgAB/CidAB protein localized to the chloroplast envelope that is involved in chloroplast development, carbon partitioning, ABA/drought response, and leaf senescence. The gene may have evolved from gene fusion of bacterial LrgA and LrgB.                                                                                                                                                                                                                                                           | 78.83   | 42.43   | 1.86 | 9.07E-04 | 2.11E-03 |
| 5065 | 7 | F2-3 vs. S2-3 | 263108_at  | AT1G65240 | Eukaryotic aspartyl protease family protein;(source:Araport11)                                                                                                                                                                                                                                                                                                                                                                                                                                                          | 53.26   | 28.64   | 1.86 | 3.63E-04 | 1.04E-03 |
| 5066 | 7 | F2-3 vs. S2-3 | 262933_at  | AT1G65840 | encodes a peroxisomal polyamine oxidase, involved in the back-conversion polyamine degradation pathway. Among the five polyamine oxidases in the Arabidopsis genome, PAO4 is the major isoform in root peroxisomes. The mRNA is cell-to-cell mobile.                                                                                                                                                                                                                                                                    | 57.07   | 30.65   | 1.86 | 2.35E-04 | 7.40E-04 |
| 5067 | 7 | F2-3 vs. S2-3 | 266901_at  | AT2G34600 | jasmonate-zim-domain protein 7;(source:Araport11)                                                                                                                                                                                                                                                                                                                                                                                                                                                                       | 25.87   | 13.9    | 1.86 | 4.77E-04 | 1.27E-03 |
| 5068 | 7 | F2-3 vs. S2-3 | 267388_at  | AT2G44450 | beta glucosidase 15;(source:Araport11)                                                                                                                                                                                                                                                                                                                                                                                                                                                                                  | 67.55   | 36.23   | 1.86 | 8.39E-05 | 3.42E-04 |
| 5069 | 7 | F2-3 vs. S2-3 | 257696_at  | AT3G12690 | Encodes a putative serine/threonine kinase It is expressed specifically in pollen and appears to function redundantly with AGC1.7 to regulate polarized growth of pollen tubes.                                                                                                                                                                                                                                                                                                                                         | 109.05  | 58.6    | 1.86 | 5.34E-04 | 1.39E-03 |
| 5070 | 7 | F2-3 vs. S2-3 | 257672_at  | AT3G20300 | extracellular ligand-gated ion channel protein (DUF3537);(source:Araport11)                                                                                                                                                                                                                                                                                                                                                                                                                                             | 25.43   | 13.64   | 1.86 | 2.07E-04 | 6.78E-04 |
| 5071 | 7 | F2-3 vs. S2-3 | 258044_at  | AT3G21270 | Encodes Dof zinc finger protein adof2. A member of ARF GTPase family. A thaliana has 21 members of this family, known to be essential for vesicle coating and uncoating and functions in GTP-binding. The gene is shown to play a role in cell division, cell expansion and cellulose production using antisense construct. The mRNA is cell-to-cell mobile.                                                                                                                                                            | 93.46   | 50.11   | 1.86 | 6.15E-05 | 2.73E-04 |
| 5072 | 7 | F2-3 vs. S2-3 | 251257_at  | AT3G62290 | light harvesting complex photosystem II;(source:Araport11)                                                                                                                                                                                                                                                                                                                                                                                                                                                              | 2842.36 | 1524.14 | 1.86 | 8.32E-04 | 1.97E-03 |
| 5073 | 7 | F2-3 vs. S2-3 | 251082_at  | AT5G01530 | encodes a protein with cytochrome P450 domain                                                                                                                                                                                                                                                                                                                                                                                                                                                                           | 1217.76 | 654.21  | 1.86 | 1.32E-04 | 4.80E-04 |
| 5074 | 7 | F2-3 vs. S2-3 | 250859_at  | AT5G04660 |                                                                                                                                                                                                                                                                                                                                                                                                                                                                                                                         | 71.96   | 38.73   | 1.86 | 7.91E-05 | 3.30E-04 |
| 5075 | 7 | F2-3 vs. S2-3 | 249927_at  | AT5G19220 | Encodes the large subunit of ADP-glucose pyrophosphorylase which catalyzes the first, rate limiting step in starch biosynthesis. The large subunit plays a regulatory role whereas the small subunit (ApS) is the catalytic isoform. Four isoforms (ApL1-4) have been identified. ApL1 is the major large subunit isoform present in leaves. Mutational analysis of APS1 suggests that APL1 and APL2 can compensate for loss of APS1 catalytic activity,suggesting both have catalytic as well as regulatory functions. | 20.38   | 10.97   | 1.86 | 5.64E-04 | 1.46E-03 |
| 5076 | 7 | F2-3 vs. S2-3 | 248586_at  | AT5G49610 | F-box family protein;(source:Araport11)                                                                                                                                                                                                                                                                                                                                                                                                                                                                                 | 79.53   | 42.87   | 1.86 | 7.20E-04 | 1.75E-03 |
| 5077 | 7 | F2-3 vs. S2-3 | 248398_at  | AT5G51970 | Encodes a putative sorbitol dehydrogenase that can be thiolated in vitro. Encodes SYP61, one of 24 Arabidopsis syntaxins. Its mRNA has been shown to be expressed. SYP61 and SYP121 coordinate the trafficking of plasma membrane aquaporin PIP2;7 to modulate the cell membrane water permeability.                                                                                                                                                                                                                    | 249.98  | 134.18  | 1.86 | 5.34E-05 | 2.49E-04 |
| 5078 | 7 | F2-3 vs. S2-3 | 261444_at  | AT1G28490 | ran guanine nucleotide release factor, putative (Mog1/PsbP/DUF1795-like photosystem II reaction center PsbP family protein);(source:Araport11)                                                                                                                                                                                                                                                                                                                                                                          | 137.14  | 74.33   | 1.85 | 5.74E-04 | 1.48E-03 |
| 5079 | 7 | F2-3 vs. S2-3 | 260397_at  | AT1G69680 | member of Putative Na⁺/H⁺ antiporter family                                                                                                                                                                                                                                                                                                                                                                                                                                                                             | 140.21  | 75.94   | 1.85 | 3.56E-04 | 1.02E-03 |
| 5080 | 7 | F2-3 vs. S2-3 | 262936_at  | AT1G79400 |                                                                                                                                                                                                                                                                                                                                                                                                                                                                                                                         | 24.03   | 13.01   | 1.85 | 5.22E-04 | 1.37E-03 |
| 5081 | 7 | F2-3 vs. S2-3 | 264904_s_a | AT2G17420 | NADPH-dependent thioredoxin reductase, major cytosolic isoformThe mRNA is cell-to-cell mobile.                                                                                                                                                                                                                                                                                                                                                                                                                          | 507.59  | 273.65  | 1.85 | 2.78E-04 | 8.40E-04 |
| 5082 | 7 | F2-3 vs. S2-3 | 267179_at  | AT2G37550 | A member of ARF GAP domain (AGD), A thaliana has 15 members, grouped into four classes.                                                                                                                                                                                                                                                                                                                                                                                                                                 | 38.4    | 20.8    | 1.85 | 3.06E-04 | 9.08E-04 |
| 5083 | 7 | F2-3 vs. S2-3 | 266087_at  | AT2G37790 | NAD(P)-linked oxidoreductase superfamily protein;(source:Araport11)                                                                                                                                                                                                                                                                                                                                                                                                                                                     | 45.07   | 24.34   | 1.85 | 1.38E-04 | 4.95E-04 |
| 5084 | 7 | F2-3 vs. S2-3 | 266399_at  | AT2G38670 | Encodes a mitochondrial ethanolamine-phosphate cytidyltransferase, involved in phosphatidylethanolamine (PE) biosynthesis.                                                                                                                                                                                                                                                                                                                                                                                              | 223.42  | 120.87  | 1.85 | 7.35E-05 | 3.09E-04 |

|      |   |               |            |           |                                                                                                                                                                                                                                                                                                                                                                                                                                                                                                                                                                                                                                                                                                                                                                                                                                                                               |         |        |      |          |          |
|------|---|---------------|------------|-----------|-------------------------------------------------------------------------------------------------------------------------------------------------------------------------------------------------------------------------------------------------------------------------------------------------------------------------------------------------------------------------------------------------------------------------------------------------------------------------------------------------------------------------------------------------------------------------------------------------------------------------------------------------------------------------------------------------------------------------------------------------------------------------------------------------------------------------------------------------------------------------------|---------|--------|------|----------|----------|
|      |   |               |            |           | Blue-light photoreceptor. Contains a light activated serine-threonine kinase domain and LOV1 and LOV2 repeats. Mutants are defective in blue-light response. Mediates blue light-induced growth enhancements. PHOT1 and PHOT2 mediate blue light-dependent activation of the plasma membrane H <sup>+</sup> -ATPase in guard cell protoplasts. PHOT1 undergoes blue-light-dependent autophosphorylation. At least eight phosphorylation sites have been identified in PHOT1. Phosphorylation of serine851 in the activation loop of PHOT1 appears to be required for stomatal opening, chloroplast accumulation, leaf flattening, and phototropism, and phosphorylation of serine849 may also contribute to the regulation of these responses. Phosphorylation-dependent binding of 14-3-3 proteins to the Hinge1 region of PHOT1 appears to require serine350 and serine376. | 49.85   | 26.88  | 1.85 | 3.68E-04 | 1.05E-03 |
| 5085 | 7 | F2-3 vs. S2-3 | 252543_at  | AT3G45780 | member of CYP81H                                                                                                                                                                                                                                                                                                                                                                                                                                                                                                                                                                                                                                                                                                                                                                                                                                                              | 49.5    | 26.73  | 1.85 | 6.24E-04 | 1.57E-03 |
| 5086 | 7 | F2-3 vs. S2-3 | 253052_at  | AT4G37310 |                                                                                                                                                                                                                                                                                                                                                                                                                                                                                                                                                                                                                                                                                                                                                                                                                                                                               |         |        |      |          |          |
|      |   |               |            |           | Encodes LAX1 (LIKE AUXIN RESISTANT), a member of the AUX1 LAX family of auxin influx carriers. Required for the establishment of embryonic root cell organization.                                                                                                                                                                                                                                                                                                                                                                                                                                                                                                                                                                                                                                                                                                            | 113.15  | 61.12  | 1.85 | 3.90E-04 | 1.09E-03 |
| 5087 | 7 | F2-3 vs. S2-3 | 251133_at  | AT5G01240 | Member of IQ67 (CaM binding) domain containing family.                                                                                                                                                                                                                                                                                                                                                                                                                                                                                                                                                                                                                                                                                                                                                                                                                        | 29.68   | 16.07  | 1.85 | 3.06E-04 | 9.07E-04 |
| 5088 | 7 | F2-3 vs. S2-3 | 250613_at  | AT5G07240 | Encodes beta-glucosidase (GLUC).                                                                                                                                                                                                                                                                                                                                                                                                                                                                                                                                                                                                                                                                                                                                                                                                                                              | 27.09   | 14.72  | 1.84 | 6.70E-05 | 2.89E-04 |
| 5089 | 7 | F2-3 vs. S2-3 | 259173_at  | AT3G03640 | alpha/beta-Hydrolases superfamily protein;(source:Araport11)                                                                                                                                                                                                                                                                                                                                                                                                                                                                                                                                                                                                                                                                                                                                                                                                                  | 123.04  | 66.83  | 1.84 | 5.86E-05 | 2.65E-04 |
| 5090 | 7 | F2-3 vs. S2-3 | 250075_at  | AT5G17670 | A member of RAN GTPase gene family. Encodes a small soluble GTP-binding protein. Likely to be involved in nuclear translocation of proteins. May also be involved in cell cycle progression. The mRNA is cell-to-cell mobile.                                                                                                                                                                                                                                                                                                                                                                                                                                                                                                                                                                                                                                                 |         |        |      |          |          |
|      |   |               | 246153_s_a | t         | encodes a ubiquitin polyprotein.                                                                                                                                                                                                                                                                                                                                                                                                                                                                                                                                                                                                                                                                                                                                                                                                                                              | 1437.37 | 779.32 | 1.84 | 2.73E-04 | 8.30E-04 |
| 5091 | 7 | F2-3 vs. S2-3 |            | AT5G20010 | Avr9/Cf-9 rapidly elicited protein;(source:Araport11)                                                                                                                                                                                                                                                                                                                                                                                                                                                                                                                                                                                                                                                                                                                                                                                                                         | 79.57   | 43.21  | 1.84 | 5.22E-04 | 1.37E-03 |
| 5092 | 7 | F2-3 vs. S2-3 | 245989_s_a | AT5G20620 |                                                                                                                                                                                                                                                                                                                                                                                                                                                                                                                                                                                                                                                                                                                                                                                                                                                                               | 60.8    | 33.06  | 1.84 | 6.38E-04 | 1.60E-03 |
| 5093 | 7 | F2-3 vs. S2-3 | 249284_at  | AT5G41810 |                                                                                                                                                                                                                                                                                                                                                                                                                                                                                                                                                                                                                                                                                                                                                                                                                                                                               |         |        |      |          |          |
|      |   |               |            |           | A subunit of Elongator, a histone acetyl transferase complex, consisting of six subunits (ELP1?ELP6), that copurifies with the elongating RNAPII in yeast and humans. Three Arabidopsis thaliana genes, encoding homologs of the yeast Elongator subunits ELP1, ELP3 (histone acetyl transferase), and ELP4 are responsible for the narrow leaf phenotype in elongata mutants and for reduced root growth that results from a decreased cell division rate. Two lines with RNAi constructs directed against HAG3 grow normally and can produce root calli, but have defects in agrobacterium-mediated transformation.                                                                                                                                                                                                                                                         | 364.1   | 197.73 | 1.84 | 1.10E-04 | 4.20E-04 |
| 5094 | 7 | F2-3 vs. S2-3 | 248508_at  | AT5G50320 |                                                                                                                                                                                                                                                                                                                                                                                                                                                                                                                                                                                                                                                                                                                                                                                                                                                                               |         |        |      |          |          |
|      |   |               |            |           | Encodes a member of the fimbrin family. Different members of the fimbrin/plastin family have diverged biochemically during evolution to generate either tight actin bundles or loose networks with distinct biochemical and biophysical properties. FIM4 generates both actin bundles and branched actin filaments whereas FIM5 only generates actin bundles.                                                                                                                                                                                                                                                                                                                                                                                                                                                                                                                 | 38.66   | 21.02  | 1.84 | 8.91E-05 | 3.59E-04 |
| 5095 | 7 | F2-3 vs. S2-3 | 248082_at  | AT5G55400 | STAY-GREEN-like protein;(source:Araport11)                                                                                                                                                                                                                                                                                                                                                                                                                                                                                                                                                                                                                                                                                                                                                                                                                                    | 92.27   | 50.47  | 1.83 | 8.53E-05 | 3.46E-04 |
| 5096 | 7 | F2-3 vs. S2-3 | 259460_at  | AT1G44000 | Major facilitator superfamily protein;(source:Araport11)                                                                                                                                                                                                                                                                                                                                                                                                                                                                                                                                                                                                                                                                                                                                                                                                                      | 503.59  | 275.61 | 1.83 | 1.42E-04 | 5.09E-04 |
| 5097 | 7 | F2-3 vs. S2-3 | 265414_at  | AT2G16660 | Encodes a protein with phosphomannose isomerase activity.                                                                                                                                                                                                                                                                                                                                                                                                                                                                                                                                                                                                                                                                                                                                                                                                                     | 86.31   | 47.17  | 1.83 | 1.67E-04 | 5.74E-04 |
| 5098 | 7 | F2-3 vs. S2-3 | 258483_at  | AT3G02570 | Encodes an atypical dual-speci&#64257;city phosphatase.                                                                                                                                                                                                                                                                                                                                                                                                                                                                                                                                                                                                                                                                                                                                                                                                                       | 39.24   | 21.45  | 1.83 | 1.94E-04 | 6.42E-04 |
| 5099 | 7 | F2-3 vs. S2-3 | 257536_at  | AT3G02800 | Nodulin MtN3 family protein;(source:Araport11)                                                                                                                                                                                                                                                                                                                                                                                                                                                                                                                                                                                                                                                                                                                                                                                                                                | 30.61   | 16.68  | 1.83 | 1.24E-04 | 4.59E-04 |
| 5100 | 7 | F2-3 vs. S2-3 | 256548_at  | AT3G14770 | rubisco accumulation factor-like protein;(source:Araport11)                                                                                                                                                                                                                                                                                                                                                                                                                                                                                                                                                                                                                                                                                                                                                                                                                   | 62.74   | 34.22  | 1.83 | 9.65E-04 | 2.22E-03 |
| 5101 | 7 | F2-3 vs. S2-3 | 245952_at  | AT5G28500 | Encodes a thioredoxin localized in chloroplast stroma. Known as CDSP32 (CHLOROPLASTIC DROUGHT-INDUCED STRESS PROTEIN OF 32 KD).                                                                                                                                                                                                                                                                                                                                                                                                                                                                                                                                                                                                                                                                                                                                               | 157.61  | 86.44  | 1.82 | 3.21E-04 | 9.42E-04 |
| 5102 | 7 | F2-3 vs. S2-3 | 261751_at  | AT1G76080 |                                                                                                                                                                                                                                                                                                                                                                                                                                                                                                                                                                                                                                                                                                                                                                                                                                                                               |         |        |      |          |          |
| 5103 | 7 | F2-3 vs. S2-3 | 265913_at  | AT2G25625 | Histone deacetylase-like protein;(source:Araport11). Induced by senescence and abiotic stresses.                                                                                                                                                                                                                                                                                                                                                                                                                                                                                                                                                                                                                                                                                                                                                                              | 42.51   | 23.34  | 1.82 | 1.60E-04 | 5.56E-04 |
|      |   |               |            |           | Encodes a chloroplast thylakoid membrane protein. Required for the assembly/accumulation of the NAD(P)H dehydrogenase complex of the photosynthetic electron transport chain.                                                                                                                                                                                                                                                                                                                                                                                                                                                                                                                                                                                                                                                                                                 | 24.41   | 13.42  | 1.82 | 2.13E-04 | 6.89E-04 |
| 5104 | 7 | F2-3 vs. S2-3 | 266483_at  | AT2G47910 | Tetratricopeptide repeat (TPR)-like superfamily protein;(source:Araport11)                                                                                                                                                                                                                                                                                                                                                                                                                                                                                                                                                                                                                                                                                                                                                                                                    | 281.31  | 154.59 | 1.82 | 4.54E-04 | 1.23E-03 |
| 5105 | 7 | F2-3 vs. S2-3 | 257611_at  | AT3G26580 | Chloroplast ribosomal protein S2                                                                                                                                                                                                                                                                                                                                                                                                                                                                                                                                                                                                                                                                                                                                                                                                                                              | 160.18  | 88.03  | 1.82 | 2.23E-04 | 7.13E-04 |
| 5106 | 7 | F2-3 vs. S2-3 | 244996_at  | ATCG00160 | Encodes a condensing enzyme KCS1 (3-ketoacyl-CoA synthase 1) which is involved in the critical fatty acid elongation process in wax biosynthesis.                                                                                                                                                                                                                                                                                                                                                                                                                                                                                                                                                                                                                                                                                                                             | 100.6   | 55.59  | 1.81 | 7.12E-04 | 1.74E-03 |
| 5107 | 7 | F2-3 vs. S2-3 | 261570_at  | AT1G01120 | RPM1 interacting protein 2, has a CUE domain which is sufficient for the interaction with RPM1.Positive regulator of RPM1 and PRS2 mediated hypersensitive response.Functions as                                                                                                                                                                                                                                                                                                                                                                                                                                                                                                                                                                                                                                                                                              |         |        |      |          |          |
|      |   |               |            |           | ubiquitin ligase and binds to RPM1.                                                                                                                                                                                                                                                                                                                                                                                                                                                                                                                                                                                                                                                                                                                                                                                                                                           | 90.63   | 50.17  | 1.81 | 8.82E-04 | 2.06E-03 |
| 5108 | 7 | F2-3 vs. S2-3 | 254108_at  | AT4G25230 | HAD superfamily, subfamily IIIB acid phosphatase;(source:Araport11)                                                                                                                                                                                                                                                                                                                                                                                                                                                                                                                                                                                                                                                                                                                                                                                                           | 126.08  | 69.76  | 1.81 | 4.27E-04 | 1.17E-03 |
| 5109 | 7 | F2-3 vs. S2-3 | 253720_at  | AT4G29270 |                                                                                                                                                                                                                                                                                                                                                                                                                                                                                                                                                                                                                                                                                                                                                                                                                                                                               |         |        |      |          |          |

|      |   |               |           |           |                                                                                                                                                                                                                                                                                                                                                                                                                                                                                                                                                                                                                                                                                      |         |        |      |          |          |
|------|---|---------------|-----------|-----------|--------------------------------------------------------------------------------------------------------------------------------------------------------------------------------------------------------------------------------------------------------------------------------------------------------------------------------------------------------------------------------------------------------------------------------------------------------------------------------------------------------------------------------------------------------------------------------------------------------------------------------------------------------------------------------------|---------|--------|------|----------|----------|
| 5110 | 7 | F2-3 vs. S2-3 | 246230_at | AT4G36710 | GRAS family transcription factor;(source:Araport11)<br>Encodes a UDP-sulfoquinovose:DAG sulfoquinovosyltransferase that is involved in sulfolipid biosynthesis and whose expression is responsive to both phosphate (Pi) and phosphite (Phi) in both roots and shoots.                                                                                                                                                                                                                                                                                                                                                                                                               | 44.91   | 24.81  | 1.81 | 1.61E-04 | 5.59E-04 |
| 5111 | 7 | F2-3 vs. S2-3 | 251143_at | AT5G01220 |                                                                                                                                                                                                                                                                                                                                                                                                                                                                                                                                                                                                                                                                                      | 16.64   | 9.21   | 1.81 | 3.11E-04 | 9.17E-04 |
| 5112 | 7 | F2-3 vs. S2-3 | 246287_at | AT1G31870 | Ortholog of yeast BUD13. Functions in pre mRNA processing of RNAs expressed in embryos.<br><br>AtSKP2;2 is a homolog of human SKP2, the human F-box protein that recruits E2F1. Contains an F-box motif at the N-terminal region and a C-terminal Leu-rich repeat domain. Forms part of an E3-ubiquitin-ligase SCF (Skp1, cullin, F-box) complex and recruits phosphorylated AtE2Fc, a transcriptional factor that might play a role in cell division and during the transition from skotomorphogenesis to photomorphogenesis. AtSKP2;1 (At1g21410) and AtSKP2;2 (At1g77000) may be duplicated genes. AtSKP2b may also be involved in the degradation of KRP1/ICK1, a CDK inhibitor. | 307.98  | 171.2  | 1.8  | 8.48E-04 | 2.00E-03 |
| 5113 | 7 | F2-3 vs. S2-3 | 264957_at | AT1G77000 |                                                                                                                                                                                                                                                                                                                                                                                                                                                                                                                                                                                                                                                                                      | 30.62   | 16.99  | 1.8  | 1.90E-04 | 6.33E-04 |
| 5114 | 7 | F2-3 vs. S2-3 | 266192_at | AT2G39080 | NAD(P)-binding Rossmann-fold superfamily protein;(source:Araport11)                                                                                                                                                                                                                                                                                                                                                                                                                                                                                                                                                                                                                  | 151.59  | 84.19  | 1.8  | 1.17E-04 | 4.40E-04 |
| 5115 | 7 | F2-3 vs. S2-3 | 250234_at | AT5G13420 | Aldolase-type TIM barrel family protein;(source:Araport11)                                                                                                                                                                                                                                                                                                                                                                                                                                                                                                                                                                                                                           | 434.68  | 241.33 | 1.8  | 2.02E-04 | 6.65E-04 |
| 5116 | 7 | F2-3 vs. S2-3 | 249059_at | AT5G44530 | Subtilase family protein;(source:Araport11)                                                                                                                                                                                                                                                                                                                                                                                                                                                                                                                                                                                                                                          | 53.35   | 29.57  | 1.8  | 6.27E-04 | 1.58E-03 |
| 5117 | 7 | F2-3 vs. S2-3 | 261462_at | AT1G07850 | transferring glycosyl group transferase (DUF604);(source:Araport11)                                                                                                                                                                                                                                                                                                                                                                                                                                                                                                                                                                                                                  | 23.98   | 13.39  | 1.79 | 4.17E-04 | 1.15E-03 |
| 5118 | 7 | F2-3 vs. S2-3 | 261708_at | AT1G32740 | SBP (S-ribonuclease binding protein) family protein;(source:Araport11)                                                                                                                                                                                                                                                                                                                                                                                                                                                                                                                                                                                                               | 26.66   | 14.92  | 1.79 | 1.03E-04 | 4.00E-04 |
| 5119 | 7 | F2-3 vs. S2-3 | 266835_at | AT2G29990 | alternative NAD(P)H dehydrogenase 2;(source:Araport11)<br>Encodes an atypical pectin methylesterase that does not require salt for its activity and has a blockwise mode of pectin demethylesterification.                                                                                                                                                                                                                                                                                                                                                                                                                                                                           | 38.39   | 21.42  | 1.79 | 9.94E-04 | 2.28E-03 |
| 5120 | 7 | F2-3 vs. S2-3 | 258193_at | AT3G29090 |                                                                                                                                                                                                                                                                                                                                                                                                                                                                                                                                                                                                                                                                                      | 92.23   | 51.42  | 1.79 | 2.56E-04 | 7.88E-04 |
| 5121 | 7 | F2-3 vs. S2-3 | 246486_at | AT5G15910 | NAD(P)-binding Rossmann-fold superfamily protein;(source:Araport11)                                                                                                                                                                                                                                                                                                                                                                                                                                                                                                                                                                                                                  | 39.64   | 22.15  | 1.79 | 6.78E-04 | 1.68E-03 |
| 5122 | 7 | F2-3 vs. S2-3 | 256119_at | AT1G18070 | Translation elongation factor EF1A/initiation factor IF2gamma family protein;(source:Araport11)<br>Encodes AAP1 (amino acid permease 1), a neutral amino acid transporter expressed in seeds. Functions in amino acid uptake into embryos. The transporter also functions in acquisition of glutamate and neutral amino acids by the root.                                                                                                                                                                                                                                                                                                                                           | 112.97  | 63.35  | 1.78 | 1.26E-04 | 4.63E-04 |
| 5123 | 7 | F2-3 vs. S2-3 | 256022_at | AT1G58360 |                                                                                                                                                                                                                                                                                                                                                                                                                                                                                                                                                                                                                                                                                      | 219.87  | 123.72 | 1.78 | 6.84E-05 | 2.94E-04 |
| 5124 | 7 | F2-3 vs. S2-3 | 265739_at | AT2G01270 | Encodes a protein disulfide isomerase-like (PDIL) protein, a member of a multigene family within the thioredoxin (TRX) superfamily. This protein also belongs to the quiescin-sulfhydryl oxidase (QSOX) family, which possess an Ery1-like domain at the COOH terminus in addition to a TRX domain.                                                                                                                                                                                                                                                                                                                                                                                  | 243.56  | 136.78 | 1.78 | 1.69E-04 | 5.79E-04 |
| 5125 | 7 | F2-3 vs. S2-3 | 245151_at | AT2G47550 | Plant invertase/pectin methylesterase inhibitor superfamily;(source:Araport11)<br>Encodes a catalytic subunit of the mitochondrially-localized NAD+- dependent isocitrate dehydrogenase                                                                                                                                                                                                                                                                                                                                                                                                                                                                                              | 21.72   | 12.17  | 1.78 | 1.32E-04 | 4.80E-04 |
| 5126 | 7 | F2-3 vs. S2-3 | 258655_at | AT3G09810 |                                                                                                                                                                                                                                                                                                                                                                                                                                                                                                                                                                                                                                                                                      | 47.01   | 26.39  | 1.78 | 2.24E-04 | 7.17E-04 |
| 5127 | 7 | F2-3 vs. S2-3 | 258314_at | AT3G16100 | RAB GTPase homolog G3C;(source:Araport11)                                                                                                                                                                                                                                                                                                                                                                                                                                                                                                                                                                                                                                            | 91.86   | 51.72  | 1.78 | 5.88E-04 | 1.51E-03 |
| 5128 | 7 | F2-3 vs. S2-3 | 246673_at | AT5G30510 | ribosomal protein S1;(source:Araport11)                                                                                                                                                                                                                                                                                                                                                                                                                                                                                                                                                                                                                                              | 1464.9  | 823.67 | 1.78 | 1.15E-04 | 4.33E-04 |
| 5129 | 7 | F2-3 vs. S2-3 | 248250_at | AT5G53130 | member of Cyclic nucleotide gated channel family<br>SMR5 is a member of the SIAMESE-RELATED Cyclin-Dependent Kinase Inhibitor family. It is induced by ROS/oxidative stress.                                                                                                                                                                                                                                                                                                                                                                                                                                                                                                         | 101.9   | 57.19  | 1.78 | 5.76E-04 | 1.48E-03 |
| 5130 | 7 | F2-3 vs. S2-3 | 261065_at | AT1G07500 |                                                                                                                                                                                                                                                                                                                                                                                                                                                                                                                                                                                                                                                                                      | 24.23   | 13.68  | 1.77 | 8.33E-05 | 3.41E-04 |
| 5131 | 7 | F2-3 vs. S2-3 | 264372_at | AT1G11840 | Encodes Ni+ dependent glyoxalase I homolog ATGLX1.                                                                                                                                                                                                                                                                                                                                                                                                                                                                                                                                                                                                                                   | 1518.38 | 859.37 | 1.77 | 9.68E-04 | 2.23E-03 |
| 5132 | 7 | F2-3 vs. S2-3 | 245756_at | AT1G35190 | 2-oxoglutarate (2OG) and Fe(II)-dependent oxygenase superfamily protein;(source:Araport11)<br><br>BUSP2 plays a smaller role than BUSP1 in pollen tube growth. bups1/2 double mutants have reduced fertility due to premature rupture of pollen tubes before they reach the ovule but single busp2 mutants are fertile. BUSP2 interacts with RALF4/19 peptide ligands and ANX1/2 receptors. BUPS/ANX signaling may regulate and promote pollen tube growth.                                                                                                                                                                                                                          | 56.93   | 32.11  | 1.77 | 6.57E-04 | 1.64E-03 |
| 5133 | 7 | F2-3 vs. S2-3 | 263748_at | AT2G21480 |                                                                                                                                                                                                                                                                                                                                                                                                                                                                                                                                                                                                                                                                                      | 17.92   | 10.13  | 1.77 | 8.08E-04 | 1.92E-03 |
| 5134 | 7 | F2-3 vs. S2-3 | 256396_at | AT3G06150 | cytochrome P450 family protein;(source:Araport11)<br>Encodes a member of a family of small,secreted, cysteine rich protein with sequence similarity to the PCP (pollen coat protein) gene family.                                                                                                                                                                                                                                                                                                                                                                                                                                                                                    | 46.71   | 26.43  | 1.77 | 7.09E-04 | 1.73E-03 |
| 5135 | 7 | F2-3 vs. S2-3 | 254886_at | AT4G11760 |                                                                                                                                                                                                                                                                                                                                                                                                                                                                                                                                                                                                                                                                                      | 24.12   | 13.65  | 1.77 | 8.10E-04 | 1.92E-03 |
| 5136 | 7 | F2-3 vs. S2-3 | 246253_at | AT4G37260 | Member of the R2R3 factor gene family. The mRNA is cell-to-cell mobile.<br>member of EXPANSIN-LIKE. Naming convention from the Expansin Working Group (Kende et al, 2004. Plant Mol Bio)                                                                                                                                                                                                                                                                                                                                                                                                                                                                                             | 221.38  | 125.4  | 1.77 | 6.10E-04 | 1.55E-03 |
| 5137 | 7 | F2-3 vs. S2-3 | 252997_at | AT4G38400 |                                                                                                                                                                                                                                                                                                                                                                                                                                                                                                                                                                                                                                                                                      | 75.81   | 42.8   | 1.77 | 6.55E-04 | 1.63E-03 |
| 5138 | 7 | F2-3 vs. S2-3 | 250408_at | AT5G10930 | Encodes CBL-interacting protein kinase 5 (CIPK5).                                                                                                                                                                                                                                                                                                                                                                                                                                                                                                                                                                                                                                    | 36.09   | 20.34  | 1.77 | 1.76E-04 | 5.98E-04 |
| 5139 | 7 | F2-3 vs. S2-3 | 245207_at | AT5G12310 | RING/U-box superfamily protein;(source:Araport11)                                                                                                                                                                                                                                                                                                                                                                                                                                                                                                                                                                                                                                    | 69.6    | 39.35  | 1.77 | 6.66E-04 | 1.65E-03 |
| 5140 | 7 | F2-3 vs. S2-3 | 259403_at | AT1G17745 | encodes a 3-Phosphoglycerate dehydrogenase The mRNA is cell-to-cell mobile.                                                                                                                                                                                                                                                                                                                                                                                                                                                                                                                                                                                                          | 290.89  | 165.52 | 1.76 | 5.02E-04 | 1.33E-03 |

|      |   |               |           |           |                                                                                                                                                                                                                                                                                                                                                                                                                                                                                                                                                                                    |        |        |      |          |          |
|------|---|---------------|-----------|-----------|------------------------------------------------------------------------------------------------------------------------------------------------------------------------------------------------------------------------------------------------------------------------------------------------------------------------------------------------------------------------------------------------------------------------------------------------------------------------------------------------------------------------------------------------------------------------------------|--------|--------|------|----------|----------|
| 5141 | 7 | F2-3 vs. S2-3 | 262546_at | AT1G31260 | member of Fe(II) transporter isolog family                                                                                                                                                                                                                                                                                                                                                                                                                                                                                                                                         | 29.4   | 16.73  | 1.76 | 1.24E-04 | 4.57E-04 |
| 5142 | 7 | F2-3 vs. S2-3 | 263594_at | AT2G01880 | purple acid phosphatase 7;(source:Araport11)<br>Encodes a protein involved in differential development of bundle sheath and mesophyll cell chloroplasts.                                                                                                                                                                                                                                                                                                                                                                                                                           | 40.07  | 22.82  | 1.76 | 2.54E-04 | 7.83E-04 |
| 5143 | 7 | F2-3 vs. S2-3 | 266079_at | AT2G37860 | Transmembrane amino acid transporter family protein;(source:Araport11)                                                                                                                                                                                                                                                                                                                                                                                                                                                                                                             | 57.5   | 32.75  | 1.76 | 5.02E-04 | 1.33E-03 |
| 5144 | 7 | F2-3 vs. S2-3 | 267080_at | AT2G41190 | Pectinacetylsterase family protein;(source:Araport11)                                                                                                                                                                                                                                                                                                                                                                                                                                                                                                                              | 86.69  | 49.21  | 1.76 | 2.09E-04 | 6.83E-04 |
| 5145 | 7 | F2-3 vs. S2-3 | 254578_at | AT4G19410 | Encodes a soluble protein with inorganic pyrophosphatase activity that is highly specific for Mg-inorganic pyrophosphate.                                                                                                                                                                                                                                                                                                                                                                                                                                                          | 996.56 | 566.57 | 1.76 | 5.87E-04 | 1.50E-03 |
| 5146 | 7 | F2-3 vs. S2-3 | 261579_at | AT1G01050 |                                                                                                                                                                                                                                                                                                                                                                                                                                                                                                                                                                                    | 242.8  | 138.93 | 1.75 | 2.14E-04 | 6.91E-04 |
| 5147 | 7 | F2-3 vs. S2-3 | 259771_at | AT1G29470 | S-adenosyl-L-methionine-dependent methyltransferases superfamily protein;(source:Araport11)                                                                                                                                                                                                                                                                                                                                                                                                                                                                                        | 347.13 | 198.06 | 1.75 | 1.02E-04 | 3.98E-04 |
| 5148 | 7 | F2-3 vs. S2-3 | 267477_at | AT2G02710 | Encodes a putative blue light receptor protein.<br>Mitochondrial NADH dehydrogenase subunit 5. The gene is trans-spliced from the three different precursors, NAD5a, NAD5b and NAD5c.                                                                                                                                                                                                                                                                                                                                                                                              | 93.07  | 53.25  | 1.75 | 5.17E-04 | 1.36E-03 |
| 5149 | 7 | F2-3 vs. S2-3 | 257337_at | ATMG00060 | Encodes a class XI myosin that is involved in organelle motility, actin organization, and optimal growth of pollen tubes.                                                                                                                                                                                                                                                                                                                                                                                                                                                          | 28.98  | 16.6   | 1.75 | 4.24E-04 | 1.17E-03 |
| 5150 | 7 | F2-3 vs. S2-3 | 264235_at | AT1G54560 | Encodes AOX1a, an isoform of alternative oxidase that is expressed in rosettes, flowers, and root. The alternative oxidase of plant mitochondria transfers electrons from the ubiquinone pool to oxygen without energy conservations. It is regulated through transcriptional control and by pyruvate. Plays a role in shoot acclimation to low temperature. Also is capable of ameliorating reactive oxygen species production when the cytochrome pathway is inhibited. AOX1a also functions as a marker for mitochondrial retrograde response. The mRNA is cell-to-cell mobile. | 36.47  | 20.94  | 1.74 | 3.81E-04 | 1.07E-03 |
| 5151 | 7 | F2-3 vs. S2-3 | 258452_at | AT3G22370 | Mediates cell elongation in brassinosteroid signaling.                                                                                                                                                                                                                                                                                                                                                                                                                                                                                                                             | 110.07 | 63.34  | 1.74 | 2.94E-04 | 8.81E-04 |
| 5152 | 7 | F2-3 vs. S2-3 | 251163_at | AT3G63310 | AMP-dependent synthetase and ligase family protein;(source:Araport11)                                                                                                                                                                                                                                                                                                                                                                                                                                                                                                              | 138.12 | 79.3   | 1.74 | 7.10E-04 | 1.73E-03 |
| 5153 | 7 | F2-3 vs. S2-3 | 254961_at | AT4G11030 | PPPDE putative thiol peptidase family protein;(source:Araport11)                                                                                                                                                                                                                                                                                                                                                                                                                                                                                                                   | 18.6   | 10.71  | 1.74 | 1.77E-04 | 5.99E-04 |
| 5154 | 7 | F2-3 vs. S2-3 | 245308_at | AT4G17486 | FKBP-like peptidyl-prolyl cis-trans isomerase family protein;(source:Araport11)                                                                                                                                                                                                                                                                                                                                                                                                                                                                                                    | 210.72 | 120.84 | 1.74 | 3.34E-04 | 9.69E-04 |
| 5155 | 7 | F2-3 vs. S2-3 | 250262_at | AT5G13410 | Glutamate-tRNA ligase. Targeted to mitochondria and chloroplast. Its inactivation causes developmental arrest of chloroplasts and mitochondria in Nicotiana benthamiana.                                                                                                                                                                                                                                                                                                                                                                                                           | 321.2  | 184.29 | 1.74 | 4.26E-04 | 1.17E-03 |
| 5156 | 7 | F2-3 vs. S2-3 | 247319_at | AT5G64050 | encodes a protein whose sequence is similar to 2-oxoglutarate-dependent dioxygenase The mRNA is cell-to-cell mobile.                                                                                                                                                                                                                                                                                                                                                                                                                                                               | 193.55 | 111.51 | 1.74 | 8.69E-04 | 2.03E-03 |
| 5157 | 7 | F2-3 vs. S2-3 | 262638_at | AT1G06650 | Cytochrome P450 superfamily protein;(source:Araport11)                                                                                                                                                                                                                                                                                                                                                                                                                                                                                                                             | 20.13  | 11.63  | 1.73 | 1.36E-04 | 4.90E-04 |
| 5158 | 7 | F2-3 vs. S2-3 | 256019_at | AT1G58265 | Transcription initiation factor IIF, beta subunit;(source:Araport11)                                                                                                                                                                                                                                                                                                                                                                                                                                                                                                               | 21.34  | 12.35  | 1.73 | 3.33E-04 | 9.66E-04 |
| 5159 | 7 | F2-3 vs. S2-3 | 262950_at | AT1G75510 | Encodes one of the two subunits forming the photosynthetic glyceraldehyde-3-phosphate dehydrogenase (GAPDH) and as such a constituent of the supramolecular complex with phosphoribulokinase (PRK) thought to be linked by a small peptide encoded by CP12-2. GapA-1 is coordinately expressed by light with PRK and CP12-2. The enzyme activity, tested in leaf protein extracts dropped significantly after external sucrose treatment for the photosynthetic GAPDH (NADPH-dependent) but not for the cytosolic GAPDH (NADH-dependent).                                          | 83.57  | 48.3   | 1.73 | 8.10E-04 | 1.92E-03 |
| 5160 | 7 | F2-3 vs. S2-3 | 257807_at | AT3G26650 | Encodes a putative ZIP protein with varying mRNA accumulation in leaves, stems and roots. Has a consensus carboxylate-bridged di-iron binding site. The mRNA is cell-to-cell mobile.                                                                                                                                                                                                                                                                                                                                                                                               | 614.7  | 354.7  | 1.73 | 1.37E-04 | 4.93E-04 |
| 5161 | 7 | F2-3 vs. S2-3 | 251664_at | AT3G56940 | Encodes a cellulose synthase isomer. CESA1 mutants have cellulose defect in the primary cell wall. Multiple lines of evidence suggest that CESA1, along with CESA3 and CESA6 are present in the same plasma membrane complex for cellulose biosynthesis. lasma membrane complex for cellulose biosynthesis. As inferred from the null role of secondary wall-type CesAs, included in a set of five primary wall-type CesAs that may support trichome cell wall thickening.                                                                                                         | 476.3  | 275.88 | 1.73 | 1.67E-04 | 5.75E-04 |
| 5162 | 7 | F2-3 vs. S2-3 | 253428_at | AT4G32410 | Thioredoxin family protein;(source:Araport11)                                                                                                                                                                                                                                                                                                                                                                                                                                                                                                                                      | 265.56 | 153.72 | 1.73 | 2.71E-04 | 8.26E-04 |
| 5163 | 7 | F2-3 vs. S2-3 | 250867_at | AT5G03880 | Regulator of chromosome condensation (RCC1) family protein;(source:Araport11)                                                                                                                                                                                                                                                                                                                                                                                                                                                                                                      | 389.45 | 224.59 | 1.73 | 4.43E-04 | 1.20E-03 |
| 5164 | 7 | F2-3 vs. S2-3 | 248693_at | AT5G48330 | Non-catalytic subunit specific to DNA-directed RNA polymerase II; the ortholog of budding yeast RPB7                                                                                                                                                                                                                                                                                                                                                                                                                                                                               | 44.32  | 25.68  | 1.73 | 1.37E-04 | 4.93E-04 |
| 5165 | 7 | F2-3 vs. S2-3 | 247763_at | AT5G59180 | AWPM-19-like family protein;(source:Araport11)                                                                                                                                                                                                                                                                                                                                                                                                                                                                                                                                     | 116.13 | 67.23  | 1.73 | 9.97E-04 | 2.28E-03 |
| 5166 | 7 | F2-3 vs. S2-3 | 259774_at | AT1G29520 |                                                                                                                                                                                                                                                                                                                                                                                                                                                                                                                                                                                    | 36.38  | 21.1   | 1.72 | 2.26E-04 | 7.20E-04 |
| 5167 | 7 | F2-3 vs. S2-3 | 260097_at | AT1G73220 | Encodes Organic Cation Transporter 1 (OCT1), likely to be involved in polyamine transport.                                                                                                                                                                                                                                                                                                                                                                                                                                                                                         | 62.19  | 36.06  | 1.72 | 1.64E-04 | 5.67E-04 |

|      |   |               |                 |           |                                                                                                                                                                                                                                                                                                                                                                                                        |         |        |      |          |          |
|------|---|---------------|-----------------|-----------|--------------------------------------------------------------------------------------------------------------------------------------------------------------------------------------------------------------------------------------------------------------------------------------------------------------------------------------------------------------------------------------------------------|---------|--------|------|----------|----------|
| 5168 | 7 | F2-3 vs. S2-3 | 245076_at       | AT2G23170 | encodes an IAA-amido synthase that conjugates Asp and other amino acids to auxin in vitro. Lhcb4:3 protein (Lhcb4.3, light harvesting complex of photosystem II The mRNA is cell-to-cell mobile.                                                                                                                                                                                                       | 21.49   | 12.53  | 1.72 | 3.96E-04 | 1.11E-03 |
| 5169 | 7 | F2-3 vs. S2-3 | 265722_at       | AT2G40100 | Bifunctional inhibitor/lipid-transfer protein/seed storage 2S albumin superfamily protein;(source:Araport11)                                                                                                                                                                                                                                                                                           | 209.8   | 122.01 | 1.72 | 9.45E-04 | 2.18E-03 |
| 5170 | 7 | F2-3 vs. S2-3 | 251928_at       | AT3G53980 | HXXXD-type acyl-transferase family protein;(source:Araport11)                                                                                                                                                                                                                                                                                                                                          | 95.14   | 55.36  | 1.72 | 2.48E-04 | 7.69E-04 |
| 5171 | 7 | F2-3 vs. S2-3 | 254737_at       | AT4G13840 | One of three genes encoding the vacuolar ATP synthase subunit B1. The protein binds to and co-localizes with F-actin, bundles F-actin to form higher-order structure, and stabilizes actin filaments in vitro.                                                                                                                                                                                         | 31.68   | 18.39  | 1.72 | 2.81E-04 | 8.46E-04 |
| 5172 | 7 | F2-3 vs. S2-3 | 252998_at       | AT4G38510 | Glycosyltransferase family 61 protein;(source:Araport11)                                                                                                                                                                                                                                                                                                                                               | 226     | 131.28 | 1.72 | 1.96E-04 | 6.49E-04 |
| 5173 | 7 | F2-3 vs. S2-3 | 245119_at       | AT2G41640 | Cyclophilin-like peptidyl-prolyl cis-trans isomerase family protein;(source:Araport11)                                                                                                                                                                                                                                                                                                                 | 18.17   | 10.66  | 1.7  | 2.48E-04 | 7.69E-04 |
| 5174 | 7 | F2-3 vs. S2-3 | 253216_at       | AT4G34960 | Part of multi-protein complex, acting as guanine nucleotide exchange factors (GEFs) and possibly as tethers, regulating intracellular trafficking.                                                                                                                                                                                                                                                     | 44.54   | 26.18  | 1.7  | 4.46E-04 | 1.21E-03 |
| 5175 | 7 | F2-3 vs. S2-3 | 252861_at       | AT4G39820 | RNA-binding protein, putative, similar to RNA-binding protein GB:CAB40027 GI:4539439 from (Arabidopsis thaliana).Member of a family of PAB2 binding domain proteins.                                                                                                                                                                                                                                   | 183.5   | 107.86 | 1.7  | 1.50E-04 | 5.32E-04 |
| 5176 | 7 | F2-3 vs. S2-3 | 261709_at       | AT1G32790 | RNA polymerase II transcription elongation factor;(source:Araport11)                                                                                                                                                                                                                                                                                                                                   | 220.63  | 130.58 | 1.69 | 3.27E-04 | 9.53E-04 |
| 5177 | 7 | F2-3 vs. S2-3 | 259756_at       | AT1G71080 | Involved in photoprotection of photosystem II.                                                                                                                                                                                                                                                                                                                                                         | 90.98   | 53.82  | 1.69 | 4.32E-04 | 1.18E-03 |
| 5178 | 7 | F2-3 vs. S2-3 | 266638_at       | AT2G35490 | Encodes triosephosphate isomerase.                                                                                                                                                                                                                                                                                                                                                                     | 576.61  | 341.07 | 1.69 | 2.40E-04 | 7.50E-04 |
| 5179 | 7 | F2-3 vs. S2-3 | 251801_at       | AT3G55440 | Encodes cystathionine beta-lyase, the second enzyme in the methionine biosynthetic pathway. Mutants show defects in root development, reduced methylation and maintenance of the quiescent center.                                                                                                                                                                                                     | 4378.55 | 2597.6 | 1.69 | 2.62E-04 | 8.02E-04 |
| 5180 | 7 | F2-3 vs. S2-3 | 251666_at       | AT3G57050 | Fibrillin precursor protein. The fibrillin preprotein, but not the mature protein interacts with ABI2. Regulated by abscisic acid response regulators. Involved in abscisic acid-mediated photoprotection.                                                                                                                                                                                             | 578.97  | 342.89 | 1.69 | 2.35E-04 | 7.40E-04 |
| 5181 | 7 | F2-3 vs. S2-3 | 255364_s_a<br>t | AT4G04020 | The mRNA is cell-to-cell mobile.                                                                                                                                                                                                                                                                                                                                                                       | 17.95   | 10.61  | 1.69 | 2.71E-04 | 8.26E-04 |
| 5182 | 7 | F2-3 vs. S2-3 | 255305_at       | AT4G04770 | Encodes an iron-stimulated ATPase. A member of the NAP subfamily of ABC transporters. Involved in Fe-S cluster assembly. Similar to SufB. Involved in the regulation of iron homeostasis. Able to form homodimers. Interacts with AtNAP7 inside the chloroplast.                                                                                                                                       | 51.11   | 30.18  | 1.69 | 7.26E-04 | 1.76E-03 |
| 5183 | 7 | F2-3 vs. S2-3 | 249835_s_a      | AT5G23490 | hypothetical protein;(source:Araport11)                                                                                                                                                                                                                                                                                                                                                                | 26.27   | 15.54  | 1.69 | 8.60E-04 | 2.02E-03 |
| 5184 | 7 | F2-3 vs. S2-3 | 247843_at       | AT5G58050 | Encodes a member of the glycerophosphodiester phosphodiesterase like (GDPD-like) family. Encodes a uridine diphosphate-glycosyltransferase that acts on methyl salicylate (MeSA) to form MeSA glucosides in vitro and in vivo and facilitates negative regulation of the SAR response by modulating homeostasis of MeSA and SA.                                                                        | 57.5    | 33.94  | 1.69 | 9.94E-04 | 2.28E-03 |
| 5185 | 7 | F2-3 vs. S2-3 | 256053_at       | AT1G07260 | Encodes subunit A of the heteromeric enzyme ATP citrate lyase (ACL). In animals, ACL is encoded by a single gene; ACL in Arabidopsis is composed of two polypeptides, ACLA (encoded by 3 genes) and ACLB (encoded by 2 genes). The holoenzyme has an A(4)B(4)stoichiometry. Expression of both ACLA and ACLB but not of either of the subunits alone results in ACL activity.                          | 17.74   | 10.58  | 1.68 | 4.00E-04 | 1.11E-03 |
| 5186 | 7 | F2-3 vs. S2-3 | 264504_at       | AT1G09430 | glycosyl hydrolase 9B5;(source:Araport11)                                                                                                                                                                                                                                                                                                                                                              | 71.33   | 42.52  | 1.68 | 3.06E-04 | 9.07E-04 |
| 5187 | 7 | F2-3 vs. S2-3 | 255756_at       | AT1G19940 | kinase with tetratricopeptide repeat domain-containing protein;(source:Araport11)                                                                                                                                                                                                                                                                                                                      | 23.81   | 14.18  | 1.68 | 3.85E-04 | 1.08E-03 |
| 5188 | 7 | F2-3 vs. S2-3 | 256213_at       | AT1G50990 | Encodes a glutathione transferase that is a member of Tau GST gene family. Expression is induced by drought stress, oxidative stress, and high doses of auxin and cytokinin. naming convention according to Wagner et al. (2002) The expression of this gene is upregulated by herbicide safeners such as benoxacor and fenclorim.                                                                     | 29.51   | 17.59  | 1.68 | 7.56E-04 | 1.81E-03 |
| 5189 | 7 | F2-3 vs. S2-3 | 260746_at       | AT1G78380 | 2-C-methyl-D-erythritol 4-phosphate cytidyltransferase;(source:Araport11)                                                                                                                                                                                                                                                                                                                              | 268.65  | 160.12 | 1.68 | 8.92E-04 | 2.08E-03 |
| 5190 | 7 | F2-3 vs. S2-3 | 256956_at       | AT3G13410 | Encodes a N-methyltransferase-like protein. Double mutants of NMT1 and NMT3 are defective in leaf, root, flower, seed, and pollen development.                                                                                                                                                                                                                                                         | 676.06  | 402.5  | 1.68 | 2.94E-04 | 8.81E-04 |
| 5191 | 7 | F2-3 vs. S2-3 | 258218_at       | AT3G18000 | MCC-B is involved in leucine degradation in mitochondria. The active protein is a dimer of MCC-A and MCC-B. MCC-A is biotinylated whereas MCC-B is not. The mRNA is cell-to-cell mobile. Encodes phytoene synthase that is the rate-limiting enzyme in the carotenoid biosynthetic pathway and that interacts with the ORANGE (OR) protein. PSY's expression is posttranscriptionally regulated by OR. | 39.69   | 23.61  | 1.68 | 8.46E-04 | 1.99E-03 |
| 5192 | 7 | F2-3 vs. S2-3 | 253279_at       | AT4G34030 | alpha/beta-Hydrolases superfamily protein;(source:Araport11)                                                                                                                                                                                                                                                                                                                                           | 119.83  | 71.54  | 1.68 | 5.99E-04 | 1.53E-03 |
| 5193 | 7 | F2-3 vs. S2-3 | 250095_at       | AT5G17230 |                                                                                                                                                                                                                                                                                                                                                                                                        | 61.5    | 36.59  | 1.68 | 2.61E-04 | 8.00E-04 |
| 5194 | 7 | F2-3 vs. S2-3 | 260474_at       | AT1G11090 |                                                                                                                                                                                                                                                                                                                                                                                                        | 76.4    | 45.74  | 1.67 | 6.10E-04 | 1.55E-03 |

|      |   |               |            |           |                                                                                                                                                                                                                                                                                                                                                                                                                                                                                                                                                                                                                                                                                          |         |        |      |          |          |
|------|---|---------------|------------|-----------|------------------------------------------------------------------------------------------------------------------------------------------------------------------------------------------------------------------------------------------------------------------------------------------------------------------------------------------------------------------------------------------------------------------------------------------------------------------------------------------------------------------------------------------------------------------------------------------------------------------------------------------------------------------------------------------|---------|--------|------|----------|----------|
|      |   |               |            |           | Encodes a ACT domain-containing protein. The ACT domain, named after bacterial aspartate kinase, chorismate mutase and TyrA (prephenate dehydrogenase), is a regulatory domain that serves as an amino acid-binding site in feedback-regulated amino acid metabolic enzymes. The mRNA is cell-to-cell mobile.                                                                                                                                                                                                                                                                                                                                                                            |         |        |      |          |          |
| 5195 | 7 | F2-3 vs. S2-3 | 256115_at  | AT1G16880 |                                                                                                                                                                                                                                                                                                                                                                                                                                                                                                                                                                                                                                                                                          | 236.89  | 141.64 | 1.67 | 2.17E-04 | 6.99E-04 |
| 5196 | 7 | F2-3 vs. S2-3 | 261324_at  | AT1G44770 | elongation factor;(source:Araport11)                                                                                                                                                                                                                                                                                                                                                                                                                                                                                                                                                                                                                                                     | 518.45  | 310.12 | 1.67 | 3.97E-04 | 1.11E-03 |
| 5197 | 7 | F2-3 vs. S2-3 | 263922_s_a | AT2G36580 | Pyruvate kinase family protein;(source:Araport11)                                                                                                                                                                                                                                                                                                                                                                                                                                                                                                                                                                                                                                        | 191.59  | 114.83 | 1.67 | 3.65E-04 | 1.04E-03 |
| 5198 | 7 | F2-3 vs. S2-3 | 258369_at  | AT3G14310 | encodes a pectin methylesterase, targeted by a cellulose binding protein (CBP) from the parasitic nematode <i>Heterodera schachtii</i> during parasitism.                                                                                                                                                                                                                                                                                                                                                                                                                                                                                                                                | 121.86  | 73.05  | 1.67 | 4.02E-04 | 1.12E-03 |
| 5199 | 7 | F2-3 vs. S2-3 | 257824_at  | AT3G25290 | Auxin-responsive family protein;(source:Araport11)                                                                                                                                                                                                                                                                                                                                                                                                                                                                                                                                                                                                                                       | 24.19   | 14.45  | 1.67 | 4.44E-04 | 1.21E-03 |
| 5200 | 7 | F2-3 vs. S2-3 | 258060_at  | AT3G26030 | protein phosphatase 2A regulatory subunit isoform B' delta The mRNA is cell-to-cell mobile.                                                                                                                                                                                                                                                                                                                                                                                                                                                                                                                                                                                              | 142.02  | 85.16  | 1.67 | 1.96E-04 | 6.49E-04 |
| 5201 | 7 | F2-3 vs. S2-3 | 254197_at  | AT4G24040 | Encodes a trehalase, member of Glycoside Hydrolase Family 37.                                                                                                                                                                                                                                                                                                                                                                                                                                                                                                                                                                                                                            | 39.7    | 23.78  | 1.67 | 6.16E-04 | 1.56E-03 |
| 5202 | 7 | F2-3 vs. S2-3 | 250948_at  | AT5G03490 | Encodes a dihydroxybenzoic acid (DHBA) glycosyltransferase. The Col-0 enzyme is responsible for biosynthesis of 2,3-DHBA xyloside and 2,5-DHBA xyloside. The Col-0 enzyme is specific for UDP-xylose and the C24 enzyme uses both UDP-glucose and UDP-xylose. This difference in sugar donor specificity was shown to be largely due to a single amino acid change between the two isoforms.                                                                                                                                                                                                                                                                                             | 46.77   | 28.01  | 1.67 | 2.90E-04 | 8.71E-04 |
| 5203 | 7 | F2-3 vs. S2-3 | 248833_at  | AT5G47120 | Encodes BI-1, a homolog of mammalian Bax inhibitor 1. Functions as an attenuator of biotic and abiotic types of cell death. Bax-induced cell death can be downregulated by ectopically expressing AtBI in planta. The mRNA is cell-to-cell mobile.                                                                                                                                                                                                                                                                                                                                                                                                                                       | 1154.44 | 690.28 | 1.67 | 4.74E-04 | 1.27E-03 |
| 5204 | 7 | F2-3 vs. S2-3 | 258925_at  | AT3G10420 | P-loop containing nucleoside triphosphate hydrolases superfamily protein;(source:Araport11)                                                                                                                                                                                                                                                                                                                                                                                                                                                                                                                                                                                              | 230.92  | 139.24 | 1.66 | 2.80E-04 | 8.45E-04 |
| 5205 | 7 | F2-3 vs. S2-3 | 257120_at  | AT3G20200 | kinase with adenine nucleotide alpha hydrolases-like domain-containing protein;(source:Araport11)                                                                                                                                                                                                                                                                                                                                                                                                                                                                                                                                                                                        | 27.5    | 16.54  | 1.66 | 3.47E-04 | 9.99E-04 |
| 5206 | 7 | F2-3 vs. S2-3 | 252037_at  | AT3G51920 | encodes a divergent member of calmodulin, which is an EF-hand family of Ca2+-binding proteins. This gene is expressed in leaves, flowers and siliques. The gene functionally complements yeast calmodulin 1 (CAM1) but only when selected against the plasmid harboring wild-type yeast sequences. Also the protein does not form a complex with a basic amphiphilic helical peptide in the presence of Ca2+ in vitro. Authors suggest that this gene may represent a Ca2+-binding sensor protein that interacts with a more limited set of target proteins than do more conventional CaM isoforms. Mutations in this gene alter plant responses to abiotic stress and abscisic acid.    | 17.67   | 10.63  | 1.66 | 4.95E-04 | 1.31E-03 |
| 5207 | 7 | F2-3 vs. S2-3 | 255453_at  | AT4G02900 | ERD (early-responsive to dehydration stress) family protein;(source:Araport11)                                                                                                                                                                                                                                                                                                                                                                                                                                                                                                                                                                                                           | 23.06   | 13.92  | 1.66 | 2.48E-04 | 7.69E-04 |
| 5208 | 7 | F2-3 vs. S2-3 | 250137_at  | AT5G15390 | tRNA/rRNA methyltransferase (SpoU) family protein;(source:Araport11)                                                                                                                                                                                                                                                                                                                                                                                                                                                                                                                                                                                                                     | 137.46  | 82.79  | 1.66 | 2.28E-04 | 7.25E-04 |
| 5209 | 7 | F2-3 vs. S2-3 | 248221_at  | AT5G53530 | Homolog of yeast retromer subunit VPS26. Part of a retromer-like protein complex involved in endosome to lysosome protein transport.                                                                                                                                                                                                                                                                                                                                                                                                                                                                                                                                                     | 278.28  | 167.28 | 1.66 | 8.69E-04 | 2.03E-03 |
| 5210 | 7 | F2-3 vs. S2-3 | 259850_at  | AT1G72240 | hypothetical protein;(source:Araport11)                                                                                                                                                                                                                                                                                                                                                                                                                                                                                                                                                                                                                                                  | 24.01   | 14.52  | 1.65 | 5.24E-04 | 1.38E-03 |
| 5211 | 7 | F2-3 vs. S2-3 | 265415_at  | AT2G20890 | Chloroplast-localized Thylakoid formation1 gene product involved in vesicle-mediated formation of thylakoid membranes. Thf1 antisense lines contain abnormal chloroplasts early in leaf development (chloroplasts have loosely stacked thylakoid membranes). Expression was induced in the light and decreased under dark conditions. G-alpha interaction partner that functions downstream of the plasma membrane?delimited heterotrimeric G-protein (GPA1) in a D-glucose signaling pathway. Localized to both the outer plastid membrane and the stroma. Probably involved in the metabolic pathway that controls the assembly of the PS II complex. The mRNA is cell-to-cell mobile. | 495.51  | 299.53 | 1.65 | 1.84E-04 | 6.19E-04 |
| 5212 | 7 | F2-3 vs. S2-3 | 257382_at  | AT2G40750 | member of WRKY Transcription Factor; Group III                                                                                                                                                                                                                                                                                                                                                                                                                                                                                                                                                                                                                                           | 21.07   | 12.78  | 1.65 | 6.07E-04 | 1.54E-03 |
| 5213 | 7 | F2-3 vs. S2-3 | 260500_at  | AT2G41705 | Encodes a fluoride export protein.                                                                                                                                                                                                                                                                                                                                                                                                                                                                                                                                                                                                                                                       | 41.11   | 24.88  | 1.65 | 3.66E-04 | 1.04E-03 |
| 5214 | 7 | F2-3 vs. S2-3 | 256804_at  | AT3G20920 | Encodes an endoplasmic reticulum localized protein with similarity to yeast Sec62p. Mutants display growth defects and significantly reduced fertility. AtSec62 does not complement the thermosensitive phenotype of yeast Sec62 mutants.                                                                                                                                                                                                                                                                                                                                                                                                                                                | 431.92  | 262.19 | 1.65 | 6.65E-04 | 1.65E-03 |
| 5215 | 7 | F2-3 vs. S2-3 | 252483_at  | AT3G46600 | GRAS family transcription factor;(source:Araport11)                                                                                                                                                                                                                                                                                                                                                                                                                                                                                                                                                                                                                                      | 49.9    | 30.16  | 1.65 | 9.98E-04 | 2.28E-03 |
| 5216 | 7 | F2-3 vs. S2-3 | 256679_at  | AT3G52300 | ATP synthase D chain;(source:Araport11)                                                                                                                                                                                                                                                                                                                                                                                                                                                                                                                                                                                                                                                  | 259.6   | 157.62 | 1.65 | 5.62E-04 | 1.45E-03 |
| 5217 | 7 | F2-3 vs. S2-3 | 254188_at  | AT4G23920 | Encodes a protein with UDP-D-glucose 4-epimerase activity. Involved in growth and cell wall carbohydrate biosynthesis.                                                                                                                                                                                                                                                                                                                                                                                                                                                                                                                                                                   | 83.88   | 50.78  | 1.65 | 9.84E-04 | 2.26E-03 |

|      |   |               |                 |           |                                                                                                                                                                                                                                                                                                                                                                                                                                                                                                              |         |        |      |          |          |
|------|---|---------------|-----------------|-----------|--------------------------------------------------------------------------------------------------------------------------------------------------------------------------------------------------------------------------------------------------------------------------------------------------------------------------------------------------------------------------------------------------------------------------------------------------------------------------------------------------------------|---------|--------|------|----------|----------|
|      |   |               |                 |           | This gene is predicted to encode an ER-localized adenine nucleotide transporter with six putative transmembrane helices. It appears to act as a ATP:ADP antiporter when expressed in E.coli plasma membranes. Transcript levels for several ER-localized chaperones (e.g. BIP1/2) and other ATP-requiring ER proteins (e.g. CPK2) are reduced in er-ant1 knock-out lines, suggesting a lack of adequate ATP transport into the ER in these mutants. They also have reduced seed oil and seed protein levels. | 39.96   | 24.23  | 1.65 | 2.66E-04 | 8.12E-04 |
| 5218 | 7 | F2-3 vs. S2-3 | 246427_at       | AT5G17400 | MBOAT (membrane bound O-acyl transferase) family protein;(source:Araport11)                                                                                                                                                                                                                                                                                                                                                                                                                                  | 36.31   | 21.97  | 1.65 | 1.89E-04 | 6.32E-04 |
| 5219 | 7 | F2-3 vs. S2-3 | 248061_at       | AT5G55340 | Tetratricopeptide repeat (TPR)-like superfamily protein;(source:Araport11)                                                                                                                                                                                                                                                                                                                                                                                                                                   | 77.19   | 46.98  | 1.64 | 9.06E-04 | 2.11E-03 |
| 5220 | 7 | F2-3 vs. S2-3 | 264455_at       | AT1G10330 | Class-II DAHP synthetase family protein;(source:Araport11)                                                                                                                                                                                                                                                                                                                                                                                                                                                   | 592.59  | 361.84 | 1.64 | 2.66E-04 | 8.13E-04 |
| 5221 | 7 | F2-3 vs. S2-3 | 261933_at       | AT1G22410 | DNAJ heat shock family protein;(source:Araport11)                                                                                                                                                                                                                                                                                                                                                                                                                                                            | 23.96   | 14.65  | 1.64 | 5.58E-04 | 1.44E-03 |
| 5222 | 7 | F2-3 vs. S2-3 | 263374_at       | AT2G20560 |                                                                                                                                                                                                                                                                                                                                                                                                                                                                                                              |         |        |      |          |          |
|      |   |               |                 |           | Encodes a member of the ERF (ethylene response factor) subfamily B-3 of ERF/AP2 transcription factor family (ATERF-1). The protein contains one AP2 domain. There are 18 members in this subfamily including ATERF-1, ATERF-2, AND ATERF-5. The mRNA is cell-to-cell mobile.                                                                                                                                                                                                                                 | 26.52   | 16.2   | 1.64 | 9.42E-04 | 2.18E-03 |
| 5223 | 7 | F2-3 vs. S2-3 | 245252_at       | AT4G17500 | Encodes a member of the ADR1 family nucleotide-binding leucine-rich repeat (NB-LRR) immune receptors. The mRNA is cell-to-cell mobile.                                                                                                                                                                                                                                                                                                                                                                       | 23.59   | 14.37  | 1.64 | 3.16E-04 | 9.29E-04 |
| 5224 | 7 | F2-3 vs. S2-3 | 250829_at       | AT5G04720 | alpha/beta-Hydrolases superfamily protein;(source:Araport11)                                                                                                                                                                                                                                                                                                                                                                                                                                                 | 115.46  | 70.41  | 1.64 | 3.22E-04 | 9.44E-04 |
| 5225 | 7 | F2-3 vs. S2-3 | 249917_at       | AT5G22460 |                                                                                                                                                                                                                                                                                                                                                                                                                                                                                                              |         |        |      |          |          |
|      |   |               |                 |           | Encodes a cytochrome P450 monooxygenase that converts indole-3-acetonitrile to indole-3-aldehyde / indole-3-carboxylic acid and cyanide. The mRNA is cell-to-cell mobile.                                                                                                                                                                                                                                                                                                                                    | 30.6    | 18.77  | 1.63 | 3.45E-04 | 9.95E-04 |
| 5226 | 7 | F2-3 vs. S2-3 | 266000_at       | AT2G24180 |                                                                                                                                                                                                                                                                                                                                                                                                                                                                                                              |         |        |      |          |          |
| 5227 | 7 | F2-3 vs. S2-3 | 253521_at       | AT4G31300 | Encodes 20S proteasome subunit PBA1 (PBA1). PBA1 acts as a plant caspase-3-like enzyme.                                                                                                                                                                                                                                                                                                                                                                                                                      | 1238.92 | 759.91 | 1.63 | 6.85E-04 | 1.69E-03 |
| 5228 | 7 | F2-3 vs. S2-3 | 250621_at       | AT5G07250 | RHOMBOID-like protein 3;(source:Araport11)                                                                                                                                                                                                                                                                                                                                                                                                                                                                   | 170.59  | 104.51 | 1.63 | 3.84E-04 | 1.08E-03 |
| 5229 | 7 | F2-3 vs. S2-3 | 249677_at       | AT5G35970 | P-loop containing nucleoside triphosphate hydrolases superfamily protein;(source:Araport11)                                                                                                                                                                                                                                                                                                                                                                                                                  | 173.69  | 106.63 | 1.63 | 5.56E-04 | 1.44E-03 |
| 5230 | 7 | F2-3 vs. S2-3 | 245164_at       | AT2G33210 | Involved in the RNA splicing of rpl2 and ccmFC introns in mitochondria.                                                                                                                                                                                                                                                                                                                                                                                                                                      | 660.87  | 407    | 1.62 | 7.79E-04 | 1.86E-03 |
| 5231 | 7 | F2-3 vs. S2-3 | 246201_at       | AT4G36750 | Quinone reductase family protein;(source:Araport11)                                                                                                                                                                                                                                                                                                                                                                                                                                                          | 26.66   | 16.46  | 1.62 | 7.55E-04 | 1.81E-03 |
|      |   |               |                 |           | Encodes a cytidine deaminase that deaminates cytidine and deoxycytidine and is competitively inhibited by cytosine-containing compounds.                                                                                                                                                                                                                                                                                                                                                                     | 85.78   | 53.35  | 1.61 | 4.41E-04 | 1.20E-03 |
| 5232 | 7 | F2-3 vs. S2-3 | 265943_at       | AT2G19570 | Cysteine proteinases superfamily protein;(source:Araport11)                                                                                                                                                                                                                                                                                                                                                                                                                                                  | 249.13  | 155.13 | 1.61 | 7.23E-04 | 1.76E-03 |
| 5233 | 7 | F2-3 vs. S2-3 | 252622_at       | AT3G45310 |                                                                                                                                                                                                                                                                                                                                                                                                                                                                                                              |         |        |      |          |          |
| 5234 | 7 | F2-3 vs. S2-3 | 253475_at       | AT4G32290 | Core-2/l-branching beta-1,6-N-acetylglucosaminyltransferase family protein;(source:Araport11)                                                                                                                                                                                                                                                                                                                                                                                                                | 54.05   | 33.63  | 1.61 | 9.99E-04 | 2.29E-03 |
| 5235 | 7 | F2-3 vs. S2-3 | 251578_at       | AT3G58180 | ARM repeat superfamily protein;(source:Araport11)                                                                                                                                                                                                                                                                                                                                                                                                                                                            | 68.26   | 42.76  | 1.6  | 3.82E-04 | 1.08E-03 |
|      |   |               |                 |           | Enzyme catalyzing the first committed step in aromatic amino acid biosynthesis The mRNA is cell-to-cell mobile.                                                                                                                                                                                                                                                                                                                                                                                              | 66.38   | 41.55  | 1.6  | 6.93E-04 | 1.70E-03 |
| 5236 | 7 | F2-3 vs. S2-3 | 253333_at       | AT4G33510 | mutant has Altered acclimation responses;                                                                                                                                                                                                                                                                                                                                                                                                                                                                    | 135.43  | 84.44  | 1.6  | 9.46E-04 | 2.18E-03 |
| 5237 | 7 | F2-3 vs. S2-3 | 249519_at       | AT5G38660 | DUF620 family protein (DUF620);(source:Araport11)                                                                                                                                                                                                                                                                                                                                                                                                                                                            | 20.6    | 12.98  | 1.59 | 3.94E-04 | 1.10E-03 |
| 5238 | 7 | F2-3 vs. S2-3 | 256506_at       | AT1G75160 | Encodes a protein localized to phloem filaments that is required for phloem filament formation. The mRNA is cell-to-cell mobile.                                                                                                                                                                                                                                                                                                                                                                             | 29.01   | 18.26  | 1.59 | 7.52E-04 | 1.81E-03 |
| 5239 | 7 | F2-3 vs. S2-3 | 259180_at       | AT3G01680 |                                                                                                                                                                                                                                                                                                                                                                                                                                                                                                              |         |        |      |          |          |
|      |   |               |                 |           | required for regulated cell expansion and normal root hair development. Encodes an evolutionarily conserved protein with putative GTP-binding motifs that is implicated in the control of vesicle trafficking between the endoplasmic reticulum and the Golgi compartments.                                                                                                                                                                                                                                  | 276.34  | 173.61 | 1.59 | 4.26E-04 | 1.17E-03 |
| 5240 | 7 | F2-3 vs. S2-3 | 257606_at       | AT3G13870 |                                                                                                                                                                                                                                                                                                                                                                                                                                                                                                              |         |        |      |          |          |
| 5241 | 7 | F2-3 vs. S2-3 | 258126_at       | AT3G24490 | Alcohol dehydrogenase transcription factor Myb/SANT-like family protein;(source:Araport11)                                                                                                                                                                                                                                                                                                                                                                                                                   | 239.54  | 150.56 | 1.59 | 7.23E-04 | 1.76E-03 |
|      |   |               |                 |           | Encodes the mitochondrial ATP synthase beta-subunit. This subunit is encoded by a multigene family of three members (At5g08670, At5g08680, At5g08690) that shared 98% sequence identity at the amino acid level. The mRNA is cell-to-cell mobile.                                                                                                                                                                                                                                                            | 1349.84 | 847.8  | 1.59 | 8.44E-04 | 1.99E-03 |
| 5242 | 7 | F2-3 vs. S2-3 | 245715_s_a<br>t | AT5G08690 | A member of EXO70 gene family, putative exocyst subunits, conserved in land plants. Arabidopsis thaliana contains 23 putative EXO70 genes, which can be classified into eight clusters on the phylogenetic tree.                                                                                                                                                                                                                                                                                             | 27.12   | 17.01  | 1.59 | 9.05E-04 | 2.11E-03 |
| 5243 | 7 | F2-3 vs. S2-3 | 248497_at       | AT5G50380 |                                                                                                                                                                                                                                                                                                                                                                                                                                                                                                              |         |        |      |          |          |
| 5244 | 7 | F2-3 vs. S2-3 | 260800_at       | AT1G78240 | Encodes TSD2 (TUMOROUS SHOOT DEVELOPMENT2), a putative methyltransferase with an essential role in cell adhesion and coordinated plant development.                                                                                                                                                                                                                                                                                                                                                          | 633.36  | 401.38 | 1.58 | 5.06E-04 | 1.33E-03 |

|      |   |               |            |           |                                                                                                                                                                                                                                                                                                                                                                                                                                                                                                                                                                                                                                                                                                                                                                         |         |         |      |          |          |
|------|---|---------------|------------|-----------|-------------------------------------------------------------------------------------------------------------------------------------------------------------------------------------------------------------------------------------------------------------------------------------------------------------------------------------------------------------------------------------------------------------------------------------------------------------------------------------------------------------------------------------------------------------------------------------------------------------------------------------------------------------------------------------------------------------------------------------------------------------------------|---------|---------|------|----------|----------|
| 5245 | 7 | F2-3 vs. S2-3 | 258722_at  | AT3G09590 | CAP (Cysteine-rich secretory proteins, Antigen 5, and Pathogenesis-related 1 protein) superfamily protein;(source:Araport11)                                                                                                                                                                                                                                                                                                                                                                                                                                                                                                                                                                                                                                            | 21.35   | 13.48   | 1.58 | 8.22E-04 | 1.94E-03 |
| 5246 | 7 | F2-3 vs. S2-3 | 252371_at  | AT3G48070 | RING/U-box superfamily protein;(source:Araport11)                                                                                                                                                                                                                                                                                                                                                                                                                                                                                                                                                                                                                                                                                                                       | 91.46   | 58.11   | 1.57 | 5.65E-04 | 1.46E-03 |
| 5247 | 7 | F2-3 vs. S2-3 | 247040_at  | AT5G67150 | HXXXD-type acyl-transferase family protein;(source:Araport11)<br>Encodes a member of the R2R3 transcription factor gene family. Expressed in response to potassium deprivation and auxin. Involved in lateral root development. Interacts with ARF7 and regulates the expression of some auxin responsive genes.                                                                                                                                                                                                                                                                                                                                                                                                                                                        | 24.42   | 15.54   | 1.57 | 6.04E-04 | 1.54E-03 |
| 5248 | 7 | F2-3 vs. S2-3 | 252193_at  | AT3G50060 | PSI type III chlorophyll a/b-binding protein (Lhca3*1) The mRNA is cell-to-cell mobile.                                                                                                                                                                                                                                                                                                                                                                                                                                                                                                                                                                                                                                                                                 | 111.63  | 71.57   | 1.56 | 6.30E-04 | 1.58E-03 |
| 5249 | 7 | F2-3 vs. S2-3 | 265033_at  | AT1G61520 | Gls protein (DUF810);(source:Araport11)                                                                                                                                                                                                                                                                                                                                                                                                                                                                                                                                                                                                                                                                                                                                 | 2488.07 | 1618.51 | 1.54 | 6.83E-04 | 1.69E-03 |
| 5250 | 7 | F2-3 vs. S2-3 | 265583_at  | AT2G20010 | RING/U-box superfamily protein;(source:Araport11)                                                                                                                                                                                                                                                                                                                                                                                                                                                                                                                                                                                                                                                                                                                       | 83.42   | 54.22   | 1.54 | 6.99E-04 | 1.72E-03 |
| 5251 | 7 | F2-3 vs. S2-3 | 267504_at  | AT2G45530 | Calcium-binding EF-hand family protein;(source:Araport11)                                                                                                                                                                                                                                                                                                                                                                                                                                                                                                                                                                                                                                                                                                               | 65.73   | 42.81   | 1.54 | 6.36E-04 | 1.59E-03 |
| 5252 | 7 | F2-3 vs. S2-3 | 265460_at  | AT2G46600 | adenosine-5'-phosphosulfate-kinase (akn2) mRNA, complete The mRNA is cell-to-cell mobile. Lhcb2.1 protein encoding a subunit of the light harvesting complex II. Member of a gene family with high degree of sequence similarity. Initially LHCB2.3 was considered as a separate gene but appears to be an allele of LHCB2.1.                                                                                                                                                                                                                                                                                                                                                                                                                                           | 832.88  | 543.93  | 1.53 | 5.41E-04 | 1.41E-03 |
| 5253 | 7 | F2-3 vs. S2-3 | 252870_at  | AT4G39940 | Plant invertase/pectin methylesterase inhibitor superfamily;(source:Araport11)                                                                                                                                                                                                                                                                                                                                                                                                                                                                                                                                                                                                                                                                                          | 61.72   | 40.41   | 1.53 | 7.07E-04 | 1.73E-03 |
| 5254 | 7 | F2-3 vs. S2-3 | 263345_s_a | AT2G05100 | PPPDE putative thiol peptidase family protein;(source:Araport11)                                                                                                                                                                                                                                                                                                                                                                                                                                                                                                                                                                                                                                                                                                        | 4136.88 | 2713.37 | 1.52 | 6.17E-04 | 1.56E-03 |
| 5255 | 7 | F2-3 vs. S2-3 | 265246_at  | AT2G43050 | CYCLASE ASSOCIATED PROTEIN                                                                                                                                                                                                                                                                                                                                                                                                                                                                                                                                                                                                                                                                                                                                              | 18.59   | 12.25   | 1.52 | 9.82E-04 | 2.26E-03 |
| 5256 | 7 | F2-3 vs. S2-3 | 254081_at  | AT4G25660 | Encodes a plastidic methionine synthase, involved in methionine de novo synthesis in the chloroplast                                                                                                                                                                                                                                                                                                                                                                                                                                                                                                                                                                                                                                                                    | 168.54  | 110.75  | 1.52 | 8.47E-04 | 1.99E-03 |
| 5257 | 7 | F2-3 vs. S2-3 | 253205_at  | AT4G34490 | UV-B-specific signaling component that orchestrates expression of a range of genes with vital UV-protective functions. Located in the nucleus and the cytosol. Associates with chromatin via histones. UV-B light promotes URV8 protein accumulation in the nucleus. UVR8 interaction with COP1 is negatively regulated by RUP1 and RUP2.                                                                                                                                                                                                                                                                                                                                                                                                                               | 1093.53 | 721.18  | 1.52 | 9.37E-04 | 2.17E-03 |
| 5258 | 7 | F2-3 vs. S2-3 | 246185_at  | AT5G20980 | encodes a type-II membrane protein that catalyzes 4-epimerization of UDP-D-Xylose to UDP-L-Arabinose in vitro, the nucleotide sugar used by glycosyltransferases in the arabinosylation of cell wall polysaccharides and wall-resident proteoglycans.                                                                                                                                                                                                                                                                                                                                                                                                                                                                                                                   | 75.74   | 49.81   | 1.52 | 7.09E-04 | 1.73E-03 |
| 5259 | 7 | F2-3 vs. S2-3 | 247307_at  | AT5G63860 | Cyclophilin-like peptidyl-prolyl cis-trans isomerase family protein;(source:Araport11)                                                                                                                                                                                                                                                                                                                                                                                                                                                                                                                                                                                                                                                                                  | 48.95   | 32.26   | 1.52 | 9.89E-04 | 2.27E-03 |
| 5260 | 7 | F2-3 vs. S2-3 | 263221_at  | AT1G30620 | HSP20-like chaperones superfamily protein;(source:Araport11)                                                                                                                                                                                                                                                                                                                                                                                                                                                                                                                                                                                                                                                                                                            | 342.32  | 229.04  | 1.49 | 9.08E-04 | 2.11E-03 |
| 5261 | 7 | F2-3 vs. S2-3 | 266411_at  | AT2G38730 | O-fucosyltransferase family protein;(source:Araport11)                                                                                                                                                                                                                                                                                                                                                                                                                                                                                                                                                                                                                                                                                                                  | 82.68   | 123.8   | 0.67 | 7.28E-04 | 1.76E-03 |
| 5262 | 7 | F2-3 vs. S2-3 | 262911_s_a | AT1G07400 | Disease resistance-responsive (dirigent-like protein) family protein;(source:Araport11)                                                                                                                                                                                                                                                                                                                                                                                                                                                                                                                                                                                                                                                                                 | 9.84    | 14.98   | 0.66 | 9.04E-04 | 2.11E-03 |
| 5263 | 7 | F2-3 vs. S2-3 | 254171_at  | AT4G24530 | Integrin-linked protein kinase family;(source:Araport11)                                                                                                                                                                                                                                                                                                                                                                                                                                                                                                                                                                                                                                                                                                                | 13      | 19.73   | 0.66 | 8.75E-04 | 2.05E-03 |
| 5264 | 7 | F2-3 vs. S2-3 | 259655_at  | AT1G55210 | Encodes a member of the lipid transfer protein family. Proteins of this family are generally small (~9 kD), basic, expressed abundantly and contain eight Cys residues. The proteins can bind fatty acids and acylCoA esters and can transfer several different phospholipids. They are localized to the cell wall. The mRNA is present in flowers and siliques, and is strongly up-regulated by abscisic acid. Predicted to be a member of PR-14 pathogenesis-related protein family with the following members: At2g38540/LTP1, At2g38530/LTP2, At5g59320/LTP3, At5g59310/LTP4, At3g51600/LTP5, At3g08770/LTP6, At2g15050/LTP7, At2g18370/LTP8, At2g15325/LTP9, At5g01870/LTP10, At4g33355/LTP11, At3g51590/LTP12, At5g44265/LTP13, At5g62065/LTP14, At4g08530/LTP15. | 37.17   | 57.35   | 0.65 | 8.16E-04 | 1.93E-03 |
| 5265 | 7 | F2-3 vs. S2-3 | 263461_at  | AT2G31800 | P-loop containing nucleoside triphosphate hydrolases superfamily protein;(source:Araport11)                                                                                                                                                                                                                                                                                                                                                                                                                                                                                                                                                                                                                                                                             | 31.57   | 48.35   | 0.65 | 6.03E-04 | 1.53E-03 |
| 5266 | 7 | F2-3 vs. S2-3 | 247718_at  | AT5G59310 | Encodes a subunit of the dolichol phosphate mannanase synthase (DPMS) complex that may serve as membrane anchors for the catalytic core, DPMS1, or provide catalytic assistance. It is localized in the ER and mediates isoprenyl-linked glycan biogenesis.                                                                                                                                                                                                                                                                                                                                                                                                                                                                                                             | 324.03  | 496.88  | 0.65 | 5.85E-04 | 1.50E-03 |
| 5267 | 7 | F2-3 vs. S2-3 | 247378_at  | AT5G63120 | Encodes a protein with RNase Z activity suggesting a role in tRNA processing. Protein contains a signal sequence for import into the chloroplast.                                                                                                                                                                                                                                                                                                                                                                                                                                                                                                                                                                                                                       | 26.67   | 40.88   | 0.65 | 9.16E-04 | 2.13E-03 |
| 5268 | 7 | F2-3 vs. S2-3 | 260724_at  | AT1G48140 | Phosphoglycerate mutase family protein;(source:Araport11)                                                                                                                                                                                                                                                                                                                                                                                                                                                                                                                                                                                                                                                                                                               | 91.24   | 142.63  | 0.64 | 6.67E-04 | 1.65E-03 |
| 5269 | 7 | F2-3 vs. S2-3 | 263864_at  | AT2G04530 |                                                                                                                                                                                                                                                                                                                                                                                                                                                                                                                                                                                                                                                                                                                                                                         | 29.85   | 46.57   | 0.64 | 3.72E-04 | 1.06E-03 |
| 5270 | 7 | F2-3 vs. S2-3 | 264907_at  | AT2G17280 |                                                                                                                                                                                                                                                                                                                                                                                                                                                                                                                                                                                                                                                                                                                                                                         | 82.01   | 127.8   | 0.64 | 9.58E-04 | 2.21E-03 |



|      |   |               |           |           |                                                                                                                                                                                                                                                                                                                                                                                                                                                                                                                                                                                                                                                                                                                                                                       |        |        |      |          |          |
|------|---|---------------|-----------|-----------|-----------------------------------------------------------------------------------------------------------------------------------------------------------------------------------------------------------------------------------------------------------------------------------------------------------------------------------------------------------------------------------------------------------------------------------------------------------------------------------------------------------------------------------------------------------------------------------------------------------------------------------------------------------------------------------------------------------------------------------------------------------------------|--------|--------|------|----------|----------|
|      |   |               |           |           | Encodes a phytochrome-specific type 5 serine/threonine protein phosphatase. It dephosphorylates active Pfr-phytochromes. Controls light signal flux by enhancing phytochrome stability and affinity for a signal transducer. The gene is alternately spliced. This variant is an integral membrane protein localized to the ER and nuclear envelope. Belongs to one of the 36 carboxylate clamp (CC)-tetratricopeptide repeat (TPR) proteins (Prasad 2010, Pubmed ID: 20856808) with potential to interact with Hsp90/Hsp70 as co-chaperones. It also regulates tetrapyrrole biosynthesis through the accumulation of Mg-ProtoIX and acts as a negative regulator of photosynthesis associated nuclear gene expression during chloroplast biogenesis and development. | 67.05  | 105.13 | 0.64 | 6.54E-04 | 1.63E-03 |
| 5271 | 7 | F2-3 vs. S2-3 | 263990_at | AT2G42810 | glycosyltransferase family protein 28;(source:Araport11)                                                                                                                                                                                                                                                                                                                                                                                                                                                                                                                                                                                                                                                                                                              | 148.56 | 233.2  | 0.64 | 4.93E-04 | 1.31E-03 |
| 5272 | 7 | F2-3 vs. S2-3 | 245442_at | AT4G16710 | tRNA/rRNA methyltransferase (SpoU) family protein;(source:Araport11)                                                                                                                                                                                                                                                                                                                                                                                                                                                                                                                                                                                                                                                                                                  | 75.12  | 117.89 | 0.64 | 6.97E-04 | 1.71E-03 |
| 5273 | 7 | F2-3 vs. S2-3 | 245404_at | AT4G17610 | prohibitin 3                                                                                                                                                                                                                                                                                                                                                                                                                                                                                                                                                                                                                                                                                                                                                          | 198.7  | 309.39 | 0.64 | 5.64E-04 | 1.46E-03 |
| 5274 | 7 | F2-3 vs. S2-3 | 249344_at | AT5G40770 |                                                                                                                                                                                                                                                                                                                                                                                                                                                                                                                                                                                                                                                                                                                                                                       |        |        |      |          |          |
| 5275 | 7 | F2-3 vs. S2-3 | 248463_at | AT5G51130 | S-adenosyl-L-methionine-dependent methyltransferases superfamily protein;(source:Araport11)                                                                                                                                                                                                                                                                                                                                                                                                                                                                                                                                                                                                                                                                           | 32.86  | 50.98  | 0.64 | 5.05E-04 | 1.33E-03 |
| 5276 | 7 | F2-3 vs. S2-3 | 261524_at | AT1G14300 | ARM repeat superfamily protein;(source:Araport11)<br>The SPR1 gene encodes a plant-specific 12-kD protein which has a repeated motif at both ends, separated by a predicted rod-like domain, suggesting that it may act as an intermolecular linker. Ubiquitously expressed and belongs to a six-member gene family in Arabidopsis; expressed in transgenic seedlings localized to microtubules within the cortical array, preprophase band, phragmoplast, and mitotic spindle.                                                                                                                                                                                                                                                                                       | 45.05  | 71.96  | 0.63 | 6.66E-04 | 1.65E-03 |
| 5277 | 7 | F2-3 vs. S2-3 | 264028_at | AT2G03680 | Small nuclear ribonucleoprotein family protein;(source:Araport11)                                                                                                                                                                                                                                                                                                                                                                                                                                                                                                                                                                                                                                                                                                     | 63.98  | 100.91 | 0.63 | 3.98E-04 | 1.11E-03 |
| 5278 | 7 | F2-3 vs. S2-3 | 263332_at | AT2G03870 |                                                                                                                                                                                                                                                                                                                                                                                                                                                                                                                                                                                                                                                                                                                                                                       | 212.17 | 338.86 | 0.63 | 9.53E-04 | 2.20E-03 |
|      |   |               |           |           | Encodes AtSPO11-1, one of the three Arabidopsis homologues of the archaeal DNA topoisomerase VIA subunit (topo VIA). Required for meiotic recombination. AtSPO11-1 and AtSPO11-2 have overlapping functions (i.e. both required for meiotic recombination) whereas AtSPO11-3 functions in DNA replication. AtSPO11-1 accumulates in foci in early G2. At 1 h post-S phase, no foci are observed, but by 3 h a majority (80%) of meiocytes at this time point contain >50 foci. However, by 5 h, AtSPO11-1 foci are no longer detectable. This suggests that the protein undergoes a rapid cycle of accumulation and disappearance in meiocytes over a period of between 1 and 5 h post-S phase.                                                                       |        |        |      |          |          |
| 5279 | 7 | F2-3 vs. S2-3 | 257179_at | AT3G13170 | TBP (TATA binding protein) associates with TAF(II)s (TBP-associated factors) to form the TFIID general transcription factor complex                                                                                                                                                                                                                                                                                                                                                                                                                                                                                                                                                                                                                                   | 25.78  | 41.08  | 0.63 | 5.51E-04 | 1.43E-03 |
| 5280 | 7 | F2-3 vs. S2-3 | 256961_at | AT3G13445 | Encodes a protein with 13.6% proline amino acids that is predicted to localize to the cell wall. The mRNA is cell-to-cell mobile.                                                                                                                                                                                                                                                                                                                                                                                                                                                                                                                                                                                                                                     | 76.3   | 121.93 | 0.63 | 4.02E-04 | 1.12E-03 |
| 5281 | 7 | F2-3 vs. S2-3 | 253808_at | AT4G28300 | belongs to cyclophilin family                                                                                                                                                                                                                                                                                                                                                                                                                                                                                                                                                                                                                                                                                                                                         | 21.87  | 34.67  | 0.63 | 6.40E-04 | 1.60E-03 |
| 5282 | 7 | F2-3 vs. S2-3 | 253221_at | AT4G34870 | member of CYP81D                                                                                                                                                                                                                                                                                                                                                                                                                                                                                                                                                                                                                                                                                                                                                      | 53     | 84.75  | 0.63 | 3.99E-04 | 1.11E-03 |
| 5283 | 7 | F2-3 vs. S2-3 | 253097_at | AT4G37320 | a member of the plasma membrane intrinsic protein subfamily PIP1. localizes to the plasma membrane and exhibits water transport activity in Xenopus oocyte. expressed ubiquitously and protein level decreases slightly during leaf development.                                                                                                                                                                                                                                                                                                                                                                                                                                                                                                                      | 26.56  | 42.34  | 0.63 | 6.67E-04 | 1.65E-03 |
| 5284 | 7 | F2-3 vs. S2-3 | 259431_at | AT1G01620 | Aldolase superfamily protein;(source:Araport11)                                                                                                                                                                                                                                                                                                                                                                                                                                                                                                                                                                                                                                                                                                                       | 240.98 | 391.81 | 0.62 | 9.40E-04 | 2.18E-03 |
| 5285 | 7 | F2-3 vs. S2-3 | 265735_at | AT2G01140 | Encodes a chloroplast-localized chaperonin 10 whose mRNA is expressed in leaves and stems but not roots.                                                                                                                                                                                                                                                                                                                                                                                                                                                                                                                                                                                                                                                              | 166.97 | 269.23 | 0.62 | 4.22E-04 | 1.16E-03 |
| 5286 | 7 | F2-3 vs. S2-3 | 266887_at | AT2G44650 | Encodes a pectin acetyltransferase that removes cell wall acetate associated with pectin formation in Arabidopsis leaves.                                                                                                                                                                                                                                                                                                                                                                                                                                                                                                                                                                                                                                             | 85.04  | 137.62 | 0.62 | 5.82E-04 | 1.49E-03 |
| 5287 | 7 | F2-3 vs. S2-3 | 266735_at | AT2G46930 |                                                                                                                                                                                                                                                                                                                                                                                                                                                                                                                                                                                                                                                                                                                                                                       | 18.48  | 29.88  | 0.62 | 8.47E-04 | 1.99E-03 |
| 5288 | 7 | F2-3 vs. S2-3 | 256567_at | AT3G19553 | Encodes POLYAMINE UPTAKE TRANSPORTER 5, an amino acid permease family protein.                                                                                                                                                                                                                                                                                                                                                                                                                                                                                                                                                                                                                                                                                        | 24.04  | 38.85  | 0.62 | 2.69E-04 | 8.22E-04 |
| 5289 | 7 | F2-3 vs. S2-3 | 257826_at | AT3G26730 | RING/U-box superfamily protein;(source:Araport11)<br>Encodes a putative RNA binding protein that is localized in the nucleus and affects ABA-regulated seed germination of Arabidopsis.                                                                                                                                                                                                                                                                                                                                                                                                                                                                                                                                                                               | 101.57 | 163.17 | 0.62 | 4.49E-04 | 1.21E-03 |
| 5290 | 7 | F2-3 vs. S2-3 | 251857_at | AT3G54770 | Encodes dihydroorotase (PYR4).                                                                                                                                                                                                                                                                                                                                                                                                                                                                                                                                                                                                                                                                                                                                        | 13.57  | 21.76  | 0.62 | 9.12E-04 | 2.12E-03 |
| 5291 | 7 | F2-3 vs. S2-3 | 254267_at | AT4G22930 | Protein kinase superfamily protein;(source:Araport11)                                                                                                                                                                                                                                                                                                                                                                                                                                                                                                                                                                                                                                                                                                                 | 72.47  | 116.38 | 0.62 | 3.46E-04 | 9.98E-04 |
| 5292 | 7 | F2-3 vs. S2-3 | 251122_at | AT5G01020 | Homeobox-leucine zipper protein.                                                                                                                                                                                                                                                                                                                                                                                                                                                                                                                                                                                                                                                                                                                                      | 131.61 | 210.8  | 0.62 | 3.96E-04 | 1.11E-03 |
| 5293 | 7 | F2-3 vs. S2-3 | 250694_at | AT5G06710 | LUC7 N terminus domain-containing protein;(source:Araport11)                                                                                                                                                                                                                                                                                                                                                                                                                                                                                                                                                                                                                                                                                                          | 12.52  | 20.21  | 0.62 | 4.84E-04 | 1.29E-03 |
| 5294 | 7 | F2-3 vs. S2-3 | 248403_at | AT5G51410 | encodes a homolog of animal microtubule-end-binding protein. There are two other members of this family. EB1 forms foci at regions where the minus ends of microtubules are gathered during mitosis and early cytokinesis.                                                                                                                                                                                                                                                                                                                                                                                                                                                                                                                                            | 56.95  | 92.18  | 0.62 | 8.50E-04 | 2.00E-03 |
| 5295 | 7 | F2-3 vs. S2-3 | 247039_at | AT5G67270 |                                                                                                                                                                                                                                                                                                                                                                                                                                                                                                                                                                                                                                                                                                                                                                       | 14.19  | 22.88  | 0.62 | 8.76E-04 | 2.05E-03 |

|      |   |               |            |           |                                                                                                                                                                                                                                                                                                                                                                                                                   |        |         |      |          |          |
|------|---|---------------|------------|-----------|-------------------------------------------------------------------------------------------------------------------------------------------------------------------------------------------------------------------------------------------------------------------------------------------------------------------------------------------------------------------------------------------------------------------|--------|---------|------|----------|----------|
| 5296 | 7 | F2-3 vs. S2-3 | 260930_at  | AT1G02620 | Ras-related small GTP-binding family protein;(source:Araport11)                                                                                                                                                                                                                                                                                                                                                   | 538.11 | 879.41  | 0.61 | 8.24E-04 | 1.95E-03 |
| 5297 | 7 | F2-3 vs. S2-3 | 260782_at  | AT1G14570 | Encodes a nuclear UBX-containing protein that can bridge ubiquitin to AtCDC48A.<br>Encodes a plasma membrane localized leucine-rich repeat receptor kinase that is involved in cell wall elongation. Loss of function mutations of FEI1 and FEI2 exhibit defects in root and hypocotyl cell elongation. Double mutants are defective in cell wall biosynthesis and have thick hypocotyls, and short, thick roots. | 130.04 | 214.53  | 0.61 | 2.42E-04 | 7.55E-04 |
| 5298 | 7 | F2-3 vs. S2-3 | 256482_at  | AT1G31420 | DNase I-like superfamily protein;(source:Araport11)                                                                                                                                                                                                                                                                                                                                                               | 36.25  | 59.34   | 0.61 | 4.13E-04 | 1.14E-03 |
| 5299 | 7 | F2-3 vs. S2-3 | 260865_at  | AT1G43760 | evolutionarily conserved C-terminal region 7;(source:Araport11)                                                                                                                                                                                                                                                                                                                                                   | 14.62  | 23.92   | 0.61 | 8.69E-04 | 2.03E-03 |
| 5300 | 7 | F2-3 vs. S2-3 | 260718_at  | AT1G48110 | DNAJ heat shock N-terminal domain-containing protein;(source:Araport11)                                                                                                                                                                                                                                                                                                                                           | 113.67 | 186.66  | 0.61 | 3.38E-04 | 9.78E-04 |
| 5301 | 7 | F2-3 vs. S2-3 | 263101_s_a | AT2G05250 | RPM1-interacting protein 4 (RIN4) family protein;(source:Araport11)                                                                                                                                                                                                                                                                                                                                               | 73.21  | 120.8   | 0.61 | 2.97E-04 | 8.88E-04 |
| 5302 | 7 | F2-3 vs. S2-3 | 264617_at  | AT2G17660 | Encodes a member of a plant specific family of cyclin dependent kinases.                                                                                                                                                                                                                                                                                                                                          | 10.53  | 17.41   | 0.61 | 3.32E-04 | 9.65E-04 |
| 5303 | 7 | F2-3 vs. S2-3 | 266401_s_a | AT2G38620 | MD-2-related lipid recognition domain-containing protein;(source:Araport11)                                                                                                                                                                                                                                                                                                                                       | 121.87 | 200.17  | 0.61 | 8.14E-04 | 1.93E-03 |
| 5304 | 7 | F2-3 vs. S2-3 | 252669_at  | AT3G44100 | Ribosomal protein S5 domain 2-like superfamily protein;(source:Araport11)                                                                                                                                                                                                                                                                                                                                         | 108.58 | 177.55  | 0.61 | 2.26E-04 | 7.20E-04 |
| 5305 | 7 | F2-3 vs. S2-3 | 252508_at  | AT3G46210 | RING/U-box superfamily protein;(source:Araport11)                                                                                                                                                                                                                                                                                                                                                                 | 46.52  | 76.73   | 0.61 | 8.51E-04 | 2.00E-03 |
| 5306 | 7 | F2-3 vs. S2-3 | 254855_s_a | AT4G12140 | Encodes a vacuolar fructose transporter expressed in parenchyma and xylem that controls leaf fructose content. When its expression is reduced, fructose accumulates in leaves.                                                                                                                                                                                                                                    | 9.05   | 14.75   | 0.61 | 2.81E-04 | 8.45E-04 |
| 5307 | 7 | F2-3 vs. S2-3 | 245524_at  | AT4G15920 | Surfeit locus protein 6;(source:Araport11)                                                                                                                                                                                                                                                                                                                                                                        | 10.78  | 17.6    | 0.61 | 2.73E-04 | 8.30E-04 |
| 5308 | 7 | F2-3 vs. S2-3 | 250825_at  | AT5G05210 | Leucine-rich repeat protein kinase family protein;(source:Araport11)                                                                                                                                                                                                                                                                                                                                              | 30.26  | 49.48   | 0.61 | 7.07E-04 | 1.73E-03 |
| 5309 | 7 | F2-3 vs. S2-3 | 250462_at  | AT5G10020 | Encodes a putative plastidic glucose transporter.                                                                                                                                                                                                                                                                                                                                                                 | 35.92  | 58.75   | 0.61 | 2.44E-04 | 7.59E-04 |
| 5310 | 7 | F2-3 vs. S2-3 | 246508_at  | AT5G16150 | Encodes a beta-glucosidase involved in xyloglucan metabolism.                                                                                                                                                                                                                                                                                                                                                     | 186.7  | 307.78  | 0.61 | 7.51E-04 | 1.81E-03 |
| 5311 | 7 | F2-3 vs. S2-3 | 246184_at  | AT5G20950 | phosphatidylinositol-glycan biosynthesis class X-like protein;(source:Araport11)                                                                                                                                                                                                                                                                                                                                  | 118.39 | 194.72  | 0.61 | 7.11E-04 | 1.74E-03 |
| 5312 | 7 | F2-3 vs. S2-3 | 248842_at  | AT5G46850 | BTB/POZ domain-containing protein;(source:Araport11)                                                                                                                                                                                                                                                                                                                                                              | 75.77  | 123.61  | 0.61 | 5.77E-04 | 1.48E-03 |
| 5313 | 7 | F2-3 vs. S2-3 | 247721_at  | AT5G59140 | Ribosomal protein L11 family protein;(source:Araport11)                                                                                                                                                                                                                                                                                                                                                           | 47.06  | 76.68   | 0.61 | 2.21E-04 | 7.11E-04 |
| 5314 | 7 | F2-3 vs. S2-3 | 247584_at  | AT5G60670 | Leucine-rich repeat protein kinase family protein;(source:Araport11)                                                                                                                                                                                                                                                                                                                                              | 244.87 | 400.44  | 0.61 | 6.25E-04 | 1.57E-03 |
| 5315 | 7 | F2-3 vs. S2-3 | 246983_at  | AT5G67200 | Encodes a protein with isochorismate synthase activity involved in phyloquinone biosynthesis. Mutant studies of this gene's function suggest that its function is redundant with that of ICS1 (AT1G7410).                                                                                                                                                                                                         | 24.71  | 40.26   | 0.61 | 9.69E-04 | 2.23E-03 |
| 5316 | 7 | F2-3 vs. S2-3 | 261428_at  | AT1G18870 | Small nuclear ribonucleoprotein family protein;(source:Araport11)                                                                                                                                                                                                                                                                                                                                                 | 13.8   | 22.95   | 0.6  | 3.80E-04 | 1.07E-03 |
| 5317 | 7 | F2-3 vs. S2-3 | 259477_at  | AT1G19120 | DEA(D/H)-box RNA helicase family protein;(source:Araport11)                                                                                                                                                                                                                                                                                                                                                       | 433.34 | 722.84  | 0.6  | 4.04E-04 | 1.12E-03 |
| 5318 | 7 | F2-3 vs. S2-3 | 263679_at  | AT1G59990 | hypothetical protein;(source:Araport11)                                                                                                                                                                                                                                                                                                                                                                           | 30.78  | 51.46   | 0.6  | 9.90E-04 | 2.27E-03 |
| 5319 | 7 | F2-3 vs. S2-3 | 260264_at  | AT1G68500 | Ribosomal protein L6 family protein;(source:Araport11)                                                                                                                                                                                                                                                                                                                                                            | 36.74  | 61.59   | 0.6  | 6.15E-04 | 1.55E-03 |
| 5320 | 7 | F2-3 vs. S2-3 | 260383_s_a | AT1G74050 | ubiquitin system component Cue;(source:Araport11)                                                                                                                                                                                                                                                                                                                                                                 | 463.24 | 776.93  | 0.6  | 3.26E-04 | 9.52E-04 |
| 5321 | 7 | F2-3 vs. S2-3 | 262057_at  | AT1G80040 | cytochrome b;(source:Araport11)                                                                                                                                                                                                                                                                                                                                                                                   | 15.48  | 25.77   | 0.6  | 5.10E-04 | 1.34E-03 |
| 5322 | 7 | F2-3 vs. S2-3 | 266045_s_a | AT2G07727 | Cyclin B1;(source:Araport11)                                                                                                                                                                                                                                                                                                                                                                                      | 225.5  | 375.62  | 0.6  | 3.14E-04 | 9.25E-04 |
| 5323 | 7 | F2-3 vs. S2-3 | 267618_at  | AT2G26760 | Encodes the unique largest subunit of nuclear DNA-dependent RNA polymerase V; homologous to budding yeast RPB1 and the E. coli RNA polymerase beta prime subunit. Required for normal RNA-directed DNA methylation at non-CG methylation sites and transgene silencing. The nrpe1 mutant is more resistant to biotrophic pathogens and is primed to activate salicylic acid-dependent defence genes.              | 35.73  | 59.79   | 0.6  | 8.98E-04 | 2.09E-03 |
| 5324 | 7 | F2-3 vs. S2-3 | 267350_at  | AT2G40030 | Tetratricopeptide repeat (TPR)-like superfamily protein;(source:Araport11)                                                                                                                                                                                                                                                                                                                                        | 21.49  | 35.69   | 0.6  | 1.97E-04 | 6.51E-04 |
| 5325 | 7 | F2-3 vs. S2-3 | 266102_at  | AT2G40720 | Mitochondrial ribosomal protein L37;(source:Araport11)                                                                                                                                                                                                                                                                                                                                                            | 22.69  | 37.92   | 0.6  | 2.44E-04 | 7.59E-04 |
| 5326 | 7 | F2-3 vs. S2-3 | 259192_at  | AT3G01740 | Encodes a transcriptional activator that is associated with the plasma membrane in a dormant form and is proteolytically cleaved to create a form that can enter the nucleus. It is thought to promote ROS production by binding directly to the promoters of genes encoding ROS biosynthetic enzymes during drought-induced leaf senescence. The mRNA is cell-to-cell mobile.                                    | 40.42  | 67.58   | 0.6  | 7.41E-04 | 1.79E-03 |
| 5327 | 7 | F2-3 vs. S2-3 | 258921_at  | AT3G10500 | Encodes a member of the Rab GTPase family of proteins. This protein interacts with the tail region of a myosin XI protein (AT5G43900) in a GTP-dependent manner. It has also been identified as an isoprenylated protein.                                                                                                                                                                                         | 109.16 | 183     | 0.6  | 1.89E-04 | 6.33E-04 |
| 5328 | 7 | F2-3 vs. S2-3 | 258730_at  | AT3G11730 | sequence-specific DNA binding transcription factor;(source:Araport11)                                                                                                                                                                                                                                                                                                                                             | 175.82 | 290.95  | 0.6  | 2.09E-04 | 6.83E-04 |
| 5329 | 7 | F2-3 vs. S2-3 | 257894_at  | AT3G17100 | hypothetical protein (DUF506);(source:Araport11)                                                                                                                                                                                                                                                                                                                                                                  | 19.42  | 32.48   | 0.6  | 4.75E-04 | 1.27E-03 |
| 5330 | 7 | F2-3 vs. S2-3 | 256828_at  | AT3G22970 | Carbohydrate-binding X8 domain superfamily protein;(source:Araport11)                                                                                                                                                                                                                                                                                                                                             | 54.07  | 89.89   | 0.6  | 7.27E-04 | 1.76E-03 |
| 5331 | 7 | F2-3 vs. S2-3 | 254719_at  | AT4G13600 | RPS6A and RPS6B are fully redundant and essential during gametogenesis.                                                                                                                                                                                                                                                                                                                                           | 12.52  | 20.8    | 0.6  | 2.95E-04 | 8.82E-04 |
| 5332 | 7 | F2-3 vs. S2-3 | 250440_at  | AT5G10360 | LEM3 (ligand-effect modulator 3) family protein / CDC50 family protein;(source:Araport11)                                                                                                                                                                                                                                                                                                                         | 3676.3 | 6130.79 | 0.6  | 3.38E-04 | 9.79E-04 |
| 5333 | 7 | F2-3 vs. S2-3 | 248885_at  | AT5G46150 |                                                                                                                                                                                                                                                                                                                                                                                                                   | 14.84  | 24.56   | 0.6  | 2.50E-04 | 7.74E-04 |

|      |   |               |           |           |                                                                                                                                                                                                                                                                                                                                                                                                                                                                               |        |        |      |          |          |
|------|---|---------------|-----------|-----------|-------------------------------------------------------------------------------------------------------------------------------------------------------------------------------------------------------------------------------------------------------------------------------------------------------------------------------------------------------------------------------------------------------------------------------------------------------------------------------|--------|--------|------|----------|----------|
|      |   |               |           |           | Encodes an ESCRT-related protein: CHMP1A/AT1G73030; CHMP1B/AT1G17730. CHMP1A and B mediate multivesicular body sorting of auxin carriers and are required for plant development. ESCRT: Endosomal Sorting Complexes Required For Transport machinery; CHMP: Charged Multivesicular Body Protein/Chromatin Modifying Protein.                                                                                                                                                  | 19.19  | 32.32  | 0.59 | 2.73E-04 | 8.30E-04 |
| 5334 | 7 | F2-3 vs. S2-3 | 259402_at | AT1G17730 |                                                                                                                                                                                                                                                                                                                                                                                                                                                                               | 61.56  | 103.95 | 0.59 | 3.17E-04 | 9.31E-04 |
| 5335 | 7 | F2-3 vs. S2-3 | 264978_at | AT1G27120 | Encodes a Golgi-localized hydroxyproline-O-galactosyltransferase.                                                                                                                                                                                                                                                                                                                                                                                                             |        |        |      |          |          |
|      |   |               |           |           | In conjunction with SPL10 and SPL2, SPL11 redundantly controls proper development of lateral organs in association with shoot maturation in the reproductive phase. SPL2, SPL10, and SPL11, suppress root regeneration with age by inhibiting wound-induced auxin biosynthesis.                                                                                                                                                                                               | 20.74  | 35.24  | 0.59 | 7.81E-04 | 1.86E-03 |
|      |   |               |           |           | Encodes a nuclear-localized member of the DREB subfamily A-5 of ERF/AP2 transcription factor family. The protein contains one AP2 domain. There are 15 members in this subfamily including RAP2.1, RAP2.9 and RAP2.10. Overexpression in cultured cells results in an increase in pectin deposition.ERF014 differentially regulates responses to bacterial and fungal pathogens. A20/AN1-like zinc finger family protein;(source:Araport11)                                   | 17.34  | 29.29  | 0.59 | 6.09E-04 | 1.55E-03 |
| 5337 | 7 | F2-3 vs. S2-3 | 261327_at | AT1G44830 |                                                                                                                                                                                                                                                                                                                                                                                                                                                                               | 512.68 | 863.63 | 0.59 | 6.03E-04 | 1.53E-03 |
| 5338 | 7 | F2-3 vs. S2-3 | 265150_at | AT1G51200 |                                                                                                                                                                                                                                                                                                                                                                                                                                                                               |        |        |      |          |          |
|      |   |               |           |           | Contains a novel calcium-binding repeat sequence. Binds TSK in vitro. Localizes to small cytoplasmic vesicles in interphase cells. In cells synchronized for cell division, TSA1 and TSK relocate to ends of spindle microtubules that are ahead of separating chromatids during metaphase and anaphase of mitosis. May be involved in mitosis together with TSK. Expressed preferentially in the flower and shoot apex. Can form multimers. The mRNA is cell-to-cell mobile. | 83.96  | 142.62 | 0.59 | 1.55E-04 | 5.44E-04 |
| 5339 | 7 | F2-3 vs. S2-3 | 259609_at | AT1G52410 |                                                                                                                                                                                                                                                                                                                                                                                                                                                                               |        |        |      |          |          |
| 5340 | 7 | F2-3 vs. S2-3 | 260401_at | AT1G69840 | SPFH/Band 7/PHB domain-containing membrane-associated protein family;(source:Araport11)                                                                                                                                                                                                                                                                                                                                                                                       | 108.23 | 184.9  | 0.59 | 8.33E-04 | 1.97E-03 |
| 5341 | 7 | F2-3 vs. S2-3 | 267146_at | AT2G38160 | hypothetical protein;(source:Araport11)                                                                                                                                                                                                                                                                                                                                                                                                                                       | 11.87  | 19.98  | 0.59 | 8.56E-04 | 2.01E-03 |
| 5342 | 7 | F2-3 vs. S2-3 | 265270_at | AT2G42910 | Phosphoribosyltransferase family protein;(source:Araport11)                                                                                                                                                                                                                                                                                                                                                                                                                   | 155.32 | 263.42 | 0.59 | 8.54E-04 | 2.00E-03 |
| 5343 | 7 | F2-3 vs. S2-3 | 252252_at | AT3G49180 | Transducin/WD40 repeat-like superfamily protein;(source:Araport11)                                                                                                                                                                                                                                                                                                                                                                                                            | 60.3   | 102.52 | 0.59 | 6.57E-04 | 1.64E-03 |
|      |   |               |           |           | Encodes a canonical CC-type NLR protein that is required for the recognition of the T3SE HopZ1a as well as several other Hop effectors from the pathogenic bacteria P. syringae.                                                                                                                                                                                                                                                                                              | 19.86  | 33.86  | 0.59 | 7.57E-04 | 1.82E-03 |
| 5344 | 7 | F2-3 vs. S2-3 | 252126_at | AT3G50950 |                                                                                                                                                                                                                                                                                                                                                                                                                                                                               | 12.45  | 21.2   | 0.59 | 1.87E-04 | 6.27E-04 |
| 5345 | 7 | F2-3 vs. S2-3 | 254800_at | AT4G13070 | RNA-binding CRS1 / YhbY (CRM) domain protein;(source:Araport11)                                                                                                                                                                                                                                                                                                                                                                                                               |        |        |      |          |          |
|      |   |               |           |           | Growth regulating factor encoding transcription activator. One of the nine members of a GRF gene family, containing nuclear targeting domain. Mutants result in smaller leaves indicating the role of the gene in leaf development. Expressed in root, shoot and flower                                                                                                                                                                                                       | 13.99  | 23.63  | 0.59 | 9.11E-04 | 2.12E-03 |
| 5346 | 7 | F2-3 vs. S2-3 | 253065_at | AT4G37740 |                                                                                                                                                                                                                                                                                                                                                                                                                                                                               |        |        |      |          |          |
| 5347 | 7 | F2-3 vs. S2-3 | 252871_at | AT4G40000 | S-adenosyl-L-methionine-dependent methyltransferases superfamily protein;(source:Araport11)                                                                                                                                                                                                                                                                                                                                                                                   | 73.25  | 123.58 | 0.59 | 2.59E-04 | 7.97E-04 |
| 5348 | 7 | F2-3 vs. S2-3 | 251098_at | AT5G01650 | Tautomerase/MIF superfamily protein;(source:Araport11)                                                                                                                                                                                                                                                                                                                                                                                                                        | 190.23 | 323.65 | 0.59 | 2.27E-04 | 7.23E-04 |
| 5349 | 7 | F2-3 vs. S2-3 | 250517_at | AT5G08260 | serine carboxypeptidase-like 35;(source:Araport11)                                                                                                                                                                                                                                                                                                                                                                                                                            | 61.88  | 104.69 | 0.59 | 2.41E-04 | 7.51E-04 |
|      |   |               |           |           | Encodes an enzyme with histone acetyltransferase activity. HAM2 primarily acetylate histone H4, but also display some ability to acetylate H3. Prior acetylation of lysine 5 on histone H4 reduces radioactive acetylation by either HAM2.                                                                                                                                                                                                                                    | 54.06  | 91.55  | 0.59 | 7.80E-04 | 1.86E-03 |
| 5350 | 7 | F2-3 vs. S2-3 | 250494_at | AT5G09740 |                                                                                                                                                                                                                                                                                                                                                                                                                                                                               |        |        |      |          |          |
|      |   |               |           |           | Encodes a member of the Alfin1-like family of nuclear-localized PHD (plant homeodomain) domain containing proteins. All AL proteins except AL3 bind to di- or trimethylated histone H3 (H3K4me3/2). Members of this family include: AT5G05610 (AL1), AT3G11200 (AL2), AT3G42790 (AL3), AT5G26210 (AL4), AT5G20510 (AL5), AT2G02470 (AL6), AT1G14510 (AL7). pseudouridine synthase and archaeosine transglycosylase (PUA) domain-containing protein;(source:Araport11)         | 141.57 | 239.14 | 0.59 | 4.47E-04 | 1.21E-03 |
| 5351 | 7 | F2-3 vs. S2-3 | 246856_at | AT5G26210 |                                                                                                                                                                                                                                                                                                                                                                                                                                                                               | 43.72  | 75.24  | 0.58 | 4.41E-04 | 1.20E-03 |
| 5352 | 7 | F2-3 vs. S2-3 | 264254_at | AT1G09150 |                                                                                                                                                                                                                                                                                                                                                                                                                                                                               | 338.78 | 580.81 | 0.58 | 6.80E-04 | 1.68E-03 |
| 5353 | 7 | F2-3 vs. S2-3 | 260704_at | AT1G32470 | Single hybrid motif superfamily protein;(source:Araport11)                                                                                                                                                                                                                                                                                                                                                                                                                    |        |        |      |          |          |
|      |   |               |           |           | ABCG13 encodes a member of the ATP-binding cassette (ABC) transporter family protein. Mutants show defects in petal elongation resulting in a folded petal phenotype.                                                                                                                                                                                                                                                                                                         | 40.56  | 69.66  | 0.58 | 6.20E-04 | 1.56E-03 |
| 5354 | 7 | F2-3 vs. S2-3 | 260515_at | AT1G51460 |                                                                                                                                                                                                                                                                                                                                                                                                                                                                               | 80.06  | 138.84 | 0.58 | 2.76E-04 | 8.37E-04 |
| 5355 | 7 | F2-3 vs. S2-3 | 259649_at | AT1G55300 | TBP-associated factor 7;(source:Araport11)                                                                                                                                                                                                                                                                                                                                                                                                                                    | 16.4   | 28.34  | 0.58 | 1.60E-04 | 5.58E-04 |
| 5356 | 7 | F2-3 vs. S2-3 | 259735_at | AT1G64405 | hypothetical protein;(source:Araport11)                                                                                                                                                                                                                                                                                                                                                                                                                                       |        |        |      |          |          |

|      |   |               |             |           |                                                                                                                                                                                                                                                                                                                                                                                                                                                                                                                                                                                                                                                                                                                                                              |        |         |      |          |          |
|------|---|---------------|-------------|-----------|--------------------------------------------------------------------------------------------------------------------------------------------------------------------------------------------------------------------------------------------------------------------------------------------------------------------------------------------------------------------------------------------------------------------------------------------------------------------------------------------------------------------------------------------------------------------------------------------------------------------------------------------------------------------------------------------------------------------------------------------------------------|--------|---------|------|----------|----------|
| 5357 | 7 | F2-3 vs. S2-3 | 262951_at   | AT1G75500 | An Arabidopsis thaliana homolog of Medicago truncatula NODULIN21 (MtN21). The gene encodes a plant-specific, predicted integral membrane protein and is a member of the Plant-Drug/Metabolite Exporter (P-DME) family (Transporter Classification number: TC 2.A.7.3) and the nodulin MtN21-like transporter family.<br>C-type mannose receptor (DUF620);(source:Araport11)<br>Growth regulating factor encoding transcription activator. One of the nine members of a GRF gene family, containing nuclear targeting domain. Involved in leaf development and expressed in root, shoot and flower                                                                                                                                                            | 267.59 | 464.06  | 0.58 | 4.22E-04 | 1.16E-03 |
| 5358 | 7 | F2-3 vs. S2-3 | 262922_at   | AT1G79420 |                                                                                                                                                                                                                                                                                                                                                                                                                                                                                                                                                                                                                                                                                                                                                              | 23.71  | 41.13   | 0.58 | 5.97E-04 | 1.52E-03 |
| 5359 | 7 | F2-3 vs. S2-3 | 265531_at   | AT2G06200 |                                                                                                                                                                                                                                                                                                                                                                                                                                                                                                                                                                                                                                                                                                                                                              | 17.95  | 30.89   | 0.58 | 2.16E-04 | 6.95E-04 |
| 5360 | 7 | F2-3 vs. S2-3 | 266847_at   | AT2G26060 | Encodes a homolog of the yeast Cytosolic Iron-sulfur protein Assembly protein CIA1.<br>winged-helix DNA-binding transcription factor family protein;(source:Araport11)<br>Encodes BUBR1. May have the spindle assembly checkpoint protein functions conserved from yeast to humans.                                                                                                                                                                                                                                                                                                                                                                                                                                                                          | 49.38  | 85.8    | 0.58 | 7.75E-04 | 1.85E-03 |
| 5361 | 7 | F2-3 vs. S2-3 | 267492_at   | AT2G30620 |                                                                                                                                                                                                                                                                                                                                                                                                                                                                                                                                                                                                                                                                                                                                                              | 585.79 | 1003    | 0.58 | 2.28E-04 | 7.24E-04 |
| 5362 | 7 | F2-3 vs. S2-3 | 255790_at   | AT2G33560 | UDP-Glycosyltransferase superfamily protein;(source:Araport11)<br>nuclear factor Y, subunit B8;(source:Araport11)<br>Ribosomal protein L14p/L23e family protein;(source:Araport11)<br>RNA-binding (RRM/RBD/RNP motifs) family protein;(source:Araport11)                                                                                                                                                                                                                                                                                                                                                                                                                                                                                                     | 14.34  | 24.76   | 0.58 | 7.50E-04 | 1.81E-03 |
| 5363 | 7 | F2-3 vs. S2-3 | 263847_at   | AT2G36970 |                                                                                                                                                                                                                                                                                                                                                                                                                                                                                                                                                                                                                                                                                                                                                              | 21.15  | 36.29   | 0.58 | 4.51E-04 | 1.22E-03 |
| 5364 | 7 | F2-3 vs. S2-3 | 265466_at   | AT2G37060 |                                                                                                                                                                                                                                                                                                                                                                                                                                                                                                                                                                                                                                                                                                                                                              | 16.09  | 27.93   | 0.58 | 2.22E-04 | 7.11E-04 |
| 5365 | 7 | F2-3 vs. S2-3 | 258569_at   | AT3G04400 |                                                                                                                                                                                                                                                                                                                                                                                                                                                                                                                                                                                                                                                                                                                                                              | 3145.5 | 5407.88 | 0.58 | 2.29E-04 | 7.26E-04 |
| 5366 | 7 | F2-3 vs. S2-3 | 256971_at   | AT3G21100 |                                                                                                                                                                                                                                                                                                                                                                                                                                                                                                                                                                                                                                                                                                                                                              | 17.44  | 29.83   | 0.58 | 5.66E-04 | 1.46E-03 |
| 5367 | 7 | F2-3 vs. S2-3 | 258098_at   | AT3G23670 | Microtubule motor kinesin PAKRP1L/Kinesin-12B. Together with PAKRP1/Kinesin-12A, serve as linkers of the plus ends of antiparallel microtubules in the phragmoplast.<br>xyloglucan endotransglucosylase/hydrolase 16;(source:Araport11)                                                                                                                                                                                                                                                                                                                                                                                                                                                                                                                      | 15.3   | 26.46   | 0.58 | 5.25E-04 | 1.38E-03 |
| 5368 | 7 | F2-3 vs. S2-3 | 257203_at   | AT3G23730 |                                                                                                                                                                                                                                                                                                                                                                                                                                                                                                                                                                                                                                                                                                                                                              | 407.07 | 701.32  | 0.58 | 5.05E-04 | 1.33E-03 |
| 5369 | 7 | F2-3 vs. S2-3 | 251969_at   | AT3G53130 | Lutein-deficient 1 (LUT1) required for lutein biosynthesis, member of the xanthophyll class of carotenoids. Involved in epsilon ring hydroxylation. Maps at 67.3 cM on chromosome 3.                                                                                                                                                                                                                                                                                                                                                                                                                                                                                                                                                                         | 57.93  | 99.68   | 0.58 | 4.24E-04 | 1.17E-03 |
| 5370 | 7 | F2-3 vs. S2-3 | 251830_at   | AT3G55010 | encoding phosphoribosylformylglycinamide cyclo-ligase (syn. AIR synthetase)that phosphorylates 5-phosphoribosyl-N-formylglycinamide (FGAM) to form 5-aminoimidazole ribonucleotide (AIR)<br>GroES-like zinc-binding alcohol dehydrogenase family protein;(source:Araport11)<br>GroES-like family protein;(source:Araport11)<br>heterotrimeric G protein gamma-subunit (AGG1) mRNA,<br>transmembrane protein;(source:Araport11)<br>Nucleoside diphosphate kinase family protein;(source:Araport11)<br>Pectin lyase-like superfamily protein;(source:Araport11)<br>RING/FYVE/PHD zinc finger superfamily protein;(source:Araport11)<br>Mitochondrion-located rhomboid-like protein<br>Encodes DRP5A, a dynamin protein involved in cytokinesis in Arabidopsis. | 37.23  | 64.36   | 0.58 | 8.93E-04 | 2.08E-03 |
| 5371 | 7 | F2-3 vs. S2-3 | 251687_at   | AT3G56460 |                                                                                                                                                                                                                                                                                                                                                                                                                                                                                                                                                                                                                                                                                                                                                              | 45.88  | 79.5    | 0.58 | 4.86E-04 | 1.29E-03 |
| 5372 | 7 | F2-3 vs. S2-3 | 251425_at   | AT3G60210 |                                                                                                                                                                                                                                                                                                                                                                                                                                                                                                                                                                                                                                                                                                                                                              | 191.68 | 331.64  | 0.58 | 6.58E-04 | 1.64E-03 |
| 5373 | 7 | F2-3 vs. S2-3 | 251121_at   | AT3G63420 |                                                                                                                                                                                                                                                                                                                                                                                                                                                                                                                                                                                                                                                                                                                                                              | 26.11  | 44.91   | 0.58 | 2.13E-04 | 6.89E-04 |
| 5374 | 7 | F2-3 vs. S2-3 | 255553_at   | AT4G01960 |                                                                                                                                                                                                                                                                                                                                                                                                                                                                                                                                                                                                                                                                                                                                                              | 80.19  | 137.76  | 0.58 | 4.87E-04 | 1.29E-03 |
| 5375 | 7 | F2-3 vs. S2-3 | 254191_at   | AT4G23900 |                                                                                                                                                                                                                                                                                                                                                                                                                                                                                                                                                                                                                                                                                                                                                              | 72.3   | 125.11  | 0.58 | 4.35E-04 | 1.19E-03 |
| 5376 | 7 | F2-3 vs. S2-3 | 249275_at   | AT5G41870 |                                                                                                                                                                                                                                                                                                                                                                                                                                                                                                                                                                                                                                                                                                                                                              | 40.56  | 70.34   | 0.58 | 6.72E-04 | 1.66E-03 |
| 5377 | 7 | F2-3 vs. S2-3 | 261481_at   | AT1G14260 |                                                                                                                                                                                                                                                                                                                                                                                                                                                                                                                                                                                                                                                                                                                                                              | 14.28  | 25.06   | 0.57 | 1.99E-04 | 6.57E-04 |
| 5378 | 7 | F2-3 vs. S2-3 | 255775_at   | AT1G18600 |                                                                                                                                                                                                                                                                                                                                                                                                                                                                                                                                                                                                                                                                                                                                                              | 31.81  | 55.42   | 0.57 | 5.29E-04 | 1.38E-03 |
| 5379 | 7 | F2-3 vs. S2-3 | 261364_at   | AT1G53140 |                                                                                                                                                                                                                                                                                                                                                                                                                                                                                                                                                                                                                                                                                                                                                              | 31.73  | 55.21   | 0.57 | 4.73E-04 | 1.27E-03 |
| 5380 | 7 | F2-3 vs. S2-3 | 260618_at   | AT1G53230 | Encodes a member of a recently identified plant transcription factor family that includes Teosinte branched 1, Cycloidea 1, and proliferating cell nuclear antigen (PCNA) factors, PCF1 and 2.<br>Regulated by miR319. Involved in heterochronic regulation of leaf differentiation.<br>Transacting siRNA generating locus. Its derived siRNAs targets AT1G62930 for cleavage. Itself is targeted by TAS2-derived ta-siR2140 for cleavage.<br>Member of MEKK subfamily, a component of the stomatal development regulatory pathway.<br>Mutations in this locus result in embryo lethality.                                                                                                                                                                   | 12.62  | 21.97   | 0.57 | 5.90E-04 | 1.51E-03 |
| 5381 | 7 | F2-3 vs. S2-3 | 259689_x_at | AT1G63130 |                                                                                                                                                                                                                                                                                                                                                                                                                                                                                                                                                                                                                                                                                                                                                              | 73.71  | 130.41  | 0.57 | 1.14E-04 | 4.33E-04 |
| 5382 | 7 | F2-3 vs. S2-3 | 260291_at   | AT1G63700 |                                                                                                                                                                                                                                                                                                                                                                                                                                                                                                                                                                                                                                                                                                                                                              | 22.61  | 39.92   | 0.57 | 1.17E-04 | 4.39E-04 |
| 5383 | 7 | F2-3 vs. S2-3 | 266534_at   | AT2G16940 |                                                                                                                                                                                                                                                                                                                                                                                                                                                                                                                                                                                                                                                                                                                                                              | 202.54 | 357.33  | 0.57 | 7.89E-04 | 1.88E-03 |
| 5384 | 7 | F2-3 vs. S2-3 | 263065_at   | AT2G18170 | MAP kinase 7;(source:Araport11)                                                                                                                                                                                                                                                                                                                                                                                                                                                                                                                                                                                                                                                                                                                              | 39.75  | 69.48   | 0.57 | 3.04E-04 | 9.04E-04 |
| 5385 | 7 | F2-3 vs. S2-3 | 265695_at   | AT2G24490 | Encodes a component of Replication Protein A. Component of transcriptional gene silencing which does not affect endogenous small RNA accumulation nor DNA methylation. Localized in the nucleus. Involved in DNA repair. Interacts physically with ROS1.<br>Chaperone DnaJ-domain superfamily protein;(source:Araport11)<br>RNA recognition motif (RRM)-containing protein;(source:Araport11)                                                                                                                                                                                                                                                                                                                                                                | 57.31  | 100.34  | 0.57 | 9.28E-04 | 2.15E-03 |
| 5386 | 7 | F2-3 vs. S2-3 | 267462_at   | AT2G33735 |                                                                                                                                                                                                                                                                                                                                                                                                                                                                                                                                                                                                                                                                                                                                                              | 68.74  | 121.03  | 0.57 | 6.82E-04 | 1.68E-03 |
| 5387 | 7 | F2-3 vs. S2-3 | 256915_at   | AT3G23900 |                                                                                                                                                                                                                                                                                                                                                                                                                                                                                                                                                                                                                                                                                                                                                              | 11.67  | 20.56   | 0.57 | 2.54E-04 | 7.83E-04 |

|      |   |               |            |           |                                                                                                                                                                                                                                                                                                                                                                                                                                                                                                                                                                                                                                                                      |        |         |      |          |          |
|------|---|---------------|------------|-----------|----------------------------------------------------------------------------------------------------------------------------------------------------------------------------------------------------------------------------------------------------------------------------------------------------------------------------------------------------------------------------------------------------------------------------------------------------------------------------------------------------------------------------------------------------------------------------------------------------------------------------------------------------------------------|--------|---------|------|----------|----------|
| 5388 | 7 | F2-3 vs. S2-3 | 251890_at  | AT3G54220 | Encodes a member of a novel family having similarity to DNA binding proteins containing basic-leucine zipper regions; scr is expressed in cortex/endodermal initial cells and in the endodermal cell lineage. Regulates the radial organization of the root. Is required cell-autonomously for distal specification of the quiescent center, which in turn regulates stem cell fate of immediately surrounding cells. SCR appears to be a direct target of SHR. SCR and SCR-LIKE 23 act redundantly in bundle sheath cell fate specification.                                                                                                                        | 37.37  | 65.56   | 0.57 | 1.54E-04 | 5.43E-04 |
| 5389 | 7 | F2-3 vs. S2-3 | 251856_at  | AT3G54720 | Encodes glutamate carboxypeptidase. Various alleles show-increased cotyledon number and rate of leaf initiation, show transformation of leaves to cotyledons, altered flowering time and photomorphogenesis and an increased level of cytokinin biosynthesis. Involved in ethylene enhanced hypocotyl elongation in the light. Strong genetic interaction between TGH and AMP1. Encodes a member of the Arabidopsis LIM proteins: a family of actin bundlers with distinct expression patterns. WLIM1, WLIM2a, and WLIM2b are widely expressed, whereas PLIM2a, PLIM2b, and PLIM2c are predominantly expressed in pollen. Regulates actin cytoskeleton organization. | 37.01  | 64.56   | 0.57 | 4.50E-04 | 1.22E-03 |
| 5390 | 7 | F2-3 vs. S2-3 | 251758_at  | AT3G55770 | A member of the Glycosyltransferase Family 64, homologous to Poplar cambium-expressed GT64 gene. The EPC1 protein plays a critical role during plant development in maintaining the integrity of organs via cell-cell adhesion, thereby providing mechanical strength and facilitating the movement of metabolites throughout the plant.Loss of function specifically affects                                                                                                                                                                                                                                                                                        | 136.04 | 240.21  | 0.57 | 5.52E-04 | 1.43E-03 |
| 5391 | 7 | F2-3 vs. S2-3 | 251764_at  | AT3G55830 | glycosylinositolphosphorylceramide (GIPC) mannosylation.                                                                                                                                                                                                                                                                                                                                                                                                                                                                                                                                                                                                             | 90.86  | 160.15  | 0.57 | 3.56E-04 | 1.02E-03 |
| 5392 | 7 | F2-3 vs. S2-3 | 251695_at  | AT3G56590 | hydroxyproline-rich glycoprotein family protein;(source:Araport11)                                                                                                                                                                                                                                                                                                                                                                                                                                                                                                                                                                                                   | 13.52  | 23.74   | 0.57 | 1.92E-04 | 6.38E-04 |
| 5393 | 7 | F2-3 vs. S2-3 | 251352_at  | AT3G61070 | member of the peroxin11 (PEX11) gene family, integral to peroxisome membrane, controls peroxisome proliferation.                                                                                                                                                                                                                                                                                                                                                                                                                                                                                                                                                     | 43.67  | 76.52   | 0.57 | 2.56E-04 | 7.87E-04 |
| 5394 | 7 | F2-3 vs. S2-3 | 254991_at  | AT4G10620 | P-loop containing nucleoside triphosphate hydrolases superfamily protein;(source:Araport11)                                                                                                                                                                                                                                                                                                                                                                                                                                                                                                                                                                          | 67.65  | 118.99  | 0.57 | 8.17E-04 | 1.94E-03 |
| 5395 | 7 | F2-3 vs. S2-3 | 245357_at  | AT4G17560 | Ribosomal protein L19 family protein;(source:Araport11)                                                                                                                                                                                                                                                                                                                                                                                                                                                                                                                                                                                                              | 18.51  | 32.76   | 0.57 | 3.24E-04 | 9.47E-04 |
| 5396 | 7 | F2-3 vs. S2-3 | 254368_at  | AT4G21710 | Encodes the unique second-largest subunit of DNA-dependent RNA polymerase II; the ortholog of budding yeast RPB2 and a homolog of the E. coli RNA polymerase beta subunit.                                                                                                                                                                                                                                                                                                                                                                                                                                                                                           | 68.9   | 121.06  | 0.57 | 5.49E-04 | 1.43E-03 |
| 5397 | 7 | F2-3 vs. S2-3 | 245234_at  | AT4G25560 | LAF1 is a R2R3-MYB transcription factor and positive regulator of the phyA photoresponse. Interaction of LAF1 with HFR1 stabilize the proteins against ubiquitination by COP1(AT2G32950) and subsequent degradations. Mutants have an elongated hypocotyl specifically under far-red light but retain wild-type responses to other light wavelengths.                                                                                                                                                                                                                                                                                                                | 11.17  | 19.49   | 0.57 | 1.85E-04 | 6.23E-04 |
| 5398 | 7 | F2-3 vs. S2-3 | 253753_at  | AT4G29030 | Putative membrane lipoprotein;(source:Araport11)                                                                                                                                                                                                                                                                                                                                                                                                                                                                                                                                                                                                                     | 140.1  | 244.9   | 0.57 | 4.00E-04 | 1.11E-03 |
| 5399 | 7 | F2-3 vs. S2-3 | 253717_at  | AT4G29440 | Regulator of Vps4 activity in the MVB pathway protein;(source:Araport11)                                                                                                                                                                                                                                                                                                                                                                                                                                                                                                                                                                                             | 32.86  | 57.24   | 0.57 | 5.41E-04 | 1.41E-03 |
| 5400 | 7 | F2-3 vs. S2-3 | 253474_at  | AT4G32270 | Ubiquitin-like superfamily protein;(source:Araport11)                                                                                                                                                                                                                                                                                                                                                                                                                                                                                                                                                                                                                | 18.3   | 32.12   | 0.57 | 2.16E-04 | 6.96E-04 |
| 5401 | 7 | F2-3 vs. S2-3 | 251089_at  | AT5G01390 | DNAJ heat shock family protein;(source:Araport11)                                                                                                                                                                                                                                                                                                                                                                                                                                                                                                                                                                                                                    | 39.28  | 69.18   | 0.57 | 1.96E-04 | 6.49E-04 |
| 5402 | 7 | F2-3 vs. S2-3 | 250426_at  | AT5G10510 | Encodes an AP2-domain transcription factor involved in root stem cell identity and root development. It is also required to maintain high levels of PIN1 expression at the periphery of the meristem and modulate local auxin production in the central region of the SAM which underlies phyllotactic transitions. Intronic sequences are required for its expression in flowers.Acts redundantly with PLT5 and 7 in lateral root pattern formation.                                                                                                                                                                                                                | 12.73  | 22.38   | 0.57 | 1.93E-04 | 6.42E-04 |
| 5403 | 7 | F2-3 vs. S2-3 | 245849_at  | AT5G13520 | peptidase M1 family protein;(source:Araport11)                                                                                                                                                                                                                                                                                                                                                                                                                                                                                                                                                                                                                       | 70.91  | 125.44  | 0.57 | 1.85E-04 | 6.23E-04 |
| 5404 | 7 | F2-3 vs. S2-3 | 249888_s_a | AT5G37340 | ZPR1 zinc-finger domain protein;(source:Araport11)                                                                                                                                                                                                                                                                                                                                                                                                                                                                                                                                                                                                                   | 680.49 | 1203.22 | 0.57 | 7.48E-04 | 1.80E-03 |
| 5405 | 7 | F2-3 vs. S2-3 | 248817_at  | AT5G47020 | MraZ;(source:Araport11)                                                                                                                                                                                                                                                                                                                                                                                                                                                                                                                                                                                                                                              | 34     | 60.01   | 0.57 | 4.74E-04 | 1.27E-03 |
| 5406 | 7 | F2-3 vs. S2-3 | 248655_at  | AT5G48760 | Ribosomal protein L13 family protein;(source:Araport11)                                                                                                                                                                                                                                                                                                                                                                                                                                                                                                                                                                                                              | 266.36 | 467.91  | 0.57 | 1.18E-04 | 4.41E-04 |
| 5407 | 7 | F2-3 vs. S2-3 | 248304_at  | AT5G53180 | Encodes one of the two polypyrimidine tract-binding (PTB) protein homologs in the Arabidopsis genome. Double mutants have defects in pollen germination.                                                                                                                                                                                                                                                                                                                                                                                                                                                                                                             | 29.54  | 51.59   | 0.57 | 3.76E-04 | 1.07E-03 |
| 5408 | 7 | F2-3 vs. S2-3 | 247929_at  | AT5G57330 | Galactose mutarotase-like superfamily protein;(source:Araport11)                                                                                                                                                                                                                                                                                                                                                                                                                                                                                                                                                                                                     | 357.83 | 624.18  | 0.57 | 2.40E-04 | 7.50E-04 |
| 5409 | 7 | F2-3 vs. S2-3 | 247493_at  | AT5G61910 | DCD (Development and Cell Death) domain protein;(source:Araport11)                                                                                                                                                                                                                                                                                                                                                                                                                                                                                                                                                                                                   | 26.21  | 46.08   | 0.57 | 2.11E-04 | 6.85E-04 |
| 5410 | 7 | F2-3 vs. S2-3 | 247068_at  | AT5G66800 | membrane-associated kinase regulator-like protein;(source:Araport11)                                                                                                                                                                                                                                                                                                                                                                                                                                                                                                                                                                                                 | 52.12  | 90.97   | 0.57 | 4.60E-04 | 1.24E-03 |
| 5411 | 7 | F2-3 vs. S2-3 | 265042_at  | AT1G04040 | HAD superfamily, subfamily IIB acid phosphatase;(source:Araport11)                                                                                                                                                                                                                                                                                                                                                                                                                                                                                                                                                                                                   | 26.74  | 48.11   | 0.56 | 4.86E-04 | 1.29E-03 |
| 5412 | 7 | F2-3 vs. S2-3 | 264408_at  | AT1G10240 | FAR1-related sequence 11;(source:Araport11)                                                                                                                                                                                                                                                                                                                                                                                                                                                                                                                                                                                                                          | 73.68  | 131.82  | 0.56 | 1.06E-04 | 4.07E-04 |

|      |   |               |            |           |                                                                                                                                                                                                                                                                                                                                                                                                                                                                                                   |        |        |      |          |          |
|------|---|---------------|------------|-----------|---------------------------------------------------------------------------------------------------------------------------------------------------------------------------------------------------------------------------------------------------------------------------------------------------------------------------------------------------------------------------------------------------------------------------------------------------------------------------------------------------|--------|--------|------|----------|----------|
| 5413 | 7 | F2-3 vs. S2-3 | 264490_at  | AT1G27390 | Form of TOM20, which is a component of the TOM complex, involved in transport of nuclear-encoded mitochondrial proteins                                                                                                                                                                                                                                                                                                                                                                           | 31.89  | 57.42  | 0.56 | 7.94E-05 | 3.30E-04 |
|      |   |               |            |           | RBD1 is a thylakoid membrane-bound iron-binding protein that is required for the proper assembly of photosystem II in Arabidopsis. It is found in all oxygenic photoautotrophic organisms (plants, algae and cyanobacteria).                                                                                                                                                                                                                                                                      | 23.7   | 42.23  | 0.56 | 6.98E-04 | 1.71E-03 |
| 5414 | 7 | F2-3 vs. S2-3 | 262954_at  | AT1G54500 | Single hybrid motif superfamily protein;(source:Araport11)                                                                                                                                                                                                                                                                                                                                                                                                                                        | 72.25  | 128.35 | 0.56 | 9.31E-05 | 3.71E-04 |
| 5415 | 7 | F2-3 vs. S2-3 | 262699_at  | AT1G75980 | ABC-2 type transporter family protein;(source:Araport11)                                                                                                                                                                                                                                                                                                                                                                                                                                          | 34.31  | 60.86  | 0.56 | 6.39E-04 | 1.60E-03 |
| 5416 | 7 | F2-3 vs. S2-3 | 263726_at  | AT2G13610 | PPR containing protein;(source:Araport11)                                                                                                                                                                                                                                                                                                                                                                                                                                                         | 13.45  | 23.97  | 0.56 | 1.23E-04 | 4.57E-04 |
| 5417 | 7 | F2-3 vs. S2-3 | 266264_at  | AT2G27775 | VACUOLAR SORTING RECEPTOR 5;(source:Araport11)                                                                                                                                                                                                                                                                                                                                                                                                                                                    | 24.17  | 43.06  | 0.56 | 9.41E-04 | 2.18E-03 |
| 5418 | 7 | F2-3 vs. S2-3 | 267412_at  | AT2G34940 | ENTH/VHS/GAT family protein;(source:Araport11)                                                                                                                                                                                                                                                                                                                                                                                                                                                    | 15.46  | 27.55  | 0.56 | 2.31E-04 | 7.32E-04 |
| 5419 | 7 | F2-3 vs. S2-3 | 267052_at  | AT2G38410 | Mitochondrial protein essential for embryo development.                                                                                                                                                                                                                                                                                                                                                                                                                                           | 40.79  | 72.19  | 0.56 | 1.34E-04 | 4.84E-04 |
| 5420 | 7 | F2-3 vs. S2-3 | 245142_at  | AT2G45270 |                                                                                                                                                                                                                                                                                                                                                                                                                                                                                                   |        |        |      |          |          |
|      |   |               |            |           | Encodes a plastidial RidA (Reactive Intermediate Deaminase A) homolog that hydrolyzes the enamines/imines formed by Thr dehydratase from Ser or Thr. RidA accelerates the deamination of reactive enamine/imine intermediates produced by threonine dehydratase (At3g10050) with threonine or serine as substrates. In the absence of RidA, the serine-derived imine inactivates BCAT3 (At3g49680). RidA thus pre-emptly damage to BCAT3 by hydrolyzing the reactive imine before it does damage. | 148.45 | 262.82 | 0.56 | 1.67E-04 | 5.74E-04 |
| 5421 | 7 | F2-3 vs. S2-3 | 257674_at  | AT3G20390 | Stress induced membrane protein. Mutants show enhanced cell death under stress.                                                                                                                                                                                                                                                                                                                                                                                                                   | 20.25  | 36.09  | 0.56 | 1.93E-04 | 6.42E-04 |
| 5422 | 7 | F2-3 vs. S2-3 | 245573_at  | AT4G14730 | SNARE associated Golgi protein family;(source:Araport11)                                                                                                                                                                                                                                                                                                                                                                                                                                          | 198.23 | 355.31 | 0.56 | 4.87E-04 | 1.29E-03 |
| 5423 | 7 | F2-3 vs. S2-3 | 245361_at  | AT4G17790 | AAA-type ATPase family protein;(source:Araport11)                                                                                                                                                                                                                                                                                                                                                                                                                                                 | 24.38  | 43.15  | 0.56 | 9.86E-04 | 2.26E-03 |
| 5424 | 7 | F2-3 vs. S2-3 | 254643_at  | AT4G18820 |                                                                                                                                                                                                                                                                                                                                                                                                                                                                                                   |        |        |      |          |          |
|      |   |               |            |           | Encodes an adenine phosphoribosyltransferase (APT; EC 2.4.2.7), which is a constitutively expressed enzyme involved in the one-step salvage of adenine to AMP. APT3 has higher affinity for zeatin, isopentenyladenine and benzyladenine than APT1 but lower Vmax than APT1.                                                                                                                                                                                                                      | 114.43 | 205.21 | 0.56 | 6.67E-04 | 1.65E-03 |
| 5425 | 7 | F2-3 vs. S2-3 | 254328_at  | AT4G22570 | myosin-4 protein (DUF641);(source:Araport11)                                                                                                                                                                                                                                                                                                                                                                                                                                                      | 110.64 | 196.28 | 0.56 | 4.28E-04 | 1.17E-03 |
| 5426 | 7 | F2-3 vs. S2-3 | 253266_s_a | AT4G34080 |                                                                                                                                                                                                                                                                                                                                                                                                                                                                                                   |        |        |      |          |          |
| 5427 | 7 | F2-3 vs. S2-3 | 246196_at  | AT4G37090 | UDP-N-acetylmuramoyl-L-alanyl-D-glutamate-2, 6-diaminopimelate ligase;(source:Araport11)                                                                                                                                                                                                                                                                                                                                                                                                          | 17.44  | 31.25  | 0.56 | 6.96E-04 | 1.71E-03 |
|      |   |               |            |           | HTL belonging to the alpha/beta fold hydrolase superfamily. Mutant and over-expression studies indicates its involvement in seedling de-etiolation process. Involved in the perception of karrikins.                                                                                                                                                                                                                                                                                              |        |        |      |          |          |
| 5428 | 7 | F2-3 vs. S2-3 | 253053_at  | AT4G37470 | Interacts with MAX2. Important for cotyledon expansion.                                                                                                                                                                                                                                                                                                                                                                                                                                           | 31.78  | 56.31  | 0.56 | 3.27E-04 | 9.52E-04 |
| 5429 | 7 | F2-3 vs. S2-3 | 251050_at  | AT5G02440 | 60S ribosomal protein L36;(source:Araport11)                                                                                                                                                                                                                                                                                                                                                                                                                                                      | 13.16  | 23.46  | 0.56 | 4.70E-04 | 1.26E-03 |
| 5430 | 7 | F2-3 vs. S2-3 | 250193_at  | AT5G14540 | basic salivary proline-rich-like protein (DUF1421);(source:Araport11)                                                                                                                                                                                                                                                                                                                                                                                                                             | 19.02  | 34.19  | 0.56 | 1.66E-04 | 5.71E-04 |
| 5431 | 7 | F2-3 vs. S2-3 | 246509_at  | AT5G16715 | protein EMBRYO DEFECTIVE 2247;(source:Araport11)                                                                                                                                                                                                                                                                                                                                                                                                                                                  | 18.33  | 32.7   | 0.56 | 3.92E-04 | 1.10E-03 |
| 5432 | 7 | F2-3 vs. S2-3 | 249815_at  | AT5G23900 | Ribosomal protein L13e family protein;(source:Araport11)                                                                                                                                                                                                                                                                                                                                                                                                                                          | 56.09  | 100.96 | 0.56 | 1.18E-04 | 4.43E-04 |
|      |   |               |            |           | Encodes a member of a family of flavin monooxygenases with an important role in auxin biosynthesis. YUC6 possesses an additional thiol-reductase activity that confers drought resistance independently of auxin biosynthesis.                                                                                                                                                                                                                                                                    |        |        |      |          |          |
| 5433 | 7 | F2-3 vs. S2-3 | 246900_at  | AT5G25620 | Encodes a chloroplast localized protein that is involved in protein translocation and starch metabolism. PTST helps localize GBSS to the starch granules where GBSS functions in amylose biosynthesis.                                                                                                                                                                                                                                                                                            | 14.93  | 26.71  | 0.56 | 1.63E-04 | 5.66E-04 |
| 5434 | 7 | F2-3 vs. S2-3 | 249425_at  | AT5G39790 |                                                                                                                                                                                                                                                                                                                                                                                                                                                                                                   | 30.16  | 53.6   | 0.56 | 4.38E-04 | 1.19E-03 |
| 5435 | 7 | F2-3 vs. S2-3 | 248801_at  | AT5G47370 | homeobox-leucine zipper genes induced by auxin, but not by other phytohormones. Plays opposite roles in the shoot and root tissues in regulating auxin-mediated morphogenesis.                                                                                                                                                                                                                                                                                                                    | 33.5   | 59.88  | 0.56 | 4.44E-04 | 1.21E-03 |
|      |   |               |            |           | Encodes a putative apoplastic lipid transfer protein that is involved in systemic acquired resistance. Mutants in this gene exhibit wild-type local resistance to avirulent and virulent Pseudomonas syringae, but pathogenesis-related gene expression is abolished in uninoculated distant leaves and fail to develop SAR to virulent Pseudomonas or Peronospora parasitica. DIR1 protein is cell-to-cell mobile and is transported via phloem sap.                                             |        |        |      |          |          |
| 5436 | 7 | F2-3 vs. S2-3 | 248684_at  | AT5G48485 | hypothetical protein;(source:Araport11)                                                                                                                                                                                                                                                                                                                                                                                                                                                           | 30.48  | 54.73  | 0.56 | 2.23E-04 | 7.13E-04 |
| 5437 | 7 | F2-3 vs. S2-3 | 247715_at  | AT5G59360 | transcription initiation factor TFIID subunit (Protein of unknown function, DUF584);(source:Araport11)                                                                                                                                                                                                                                                                                                                                                                                            | 28.42  | 50.8   | 0.56 | 1.20E-04 | 4.47E-04 |
| 5438 | 7 | F2-3 vs. S2-3 | 247585_at  | AT5G60680 |                                                                                                                                                                                                                                                                                                                                                                                                                                                                                                   | 113.09 | 200.94 | 0.56 | 4.14E-04 | 1.14E-03 |
| 5439 | 7 | F2-3 vs. S2-3 | 247449_at  | AT5G62290 | nucleotide-sensitive chloride conductance regulator (ICln) family protein;(source:Araport11)                                                                                                                                                                                                                                                                                                                                                                                                      | 106.57 | 190.97 | 0.56 | 6.34E-04 | 1.59E-03 |
| 5440 | 7 | F2-3 vs. S2-3 | 247427_at  | AT5G62580 | ARM repeat superfamily protein;(source:Araport11)                                                                                                                                                                                                                                                                                                                                                                                                                                                 | 36.51  | 65.35  | 0.56 | 1.30E-04 | 4.75E-04 |

|      |   |               |            |           |                                                                                                                                                                                                                                                                                                                                                                                                                                                                                                                                                                                                                                                                                                                                                                            |        |        |      |          |          |
|------|---|---------------|------------|-----------|----------------------------------------------------------------------------------------------------------------------------------------------------------------------------------------------------------------------------------------------------------------------------------------------------------------------------------------------------------------------------------------------------------------------------------------------------------------------------------------------------------------------------------------------------------------------------------------------------------------------------------------------------------------------------------------------------------------------------------------------------------------------------|--------|--------|------|----------|----------|
| 5441 | 7 | F2-3 vs. S2-3 | 260625_at  | AT1G08060 | Encodes a transcriptional silencer that is required for proper expression of PRR/NLR immune receptor genes.                                                                                                                                                                                                                                                                                                                                                                                                                                                                                                                                                                                                                                                                | 30.36  | 55.23  | 0.55 | 5.69E-05 | 2.60E-04 |
| 5442 | 7 | F2-3 vs. S2-3 | 257463_at  | AT1G14820 | Sec14p-like phosphatidylinositol transfer family protein;(source:Araport11)                                                                                                                                                                                                                                                                                                                                                                                                                                                                                                                                                                                                                                                                                                | 207.14 | 379.21 | 0.55 | 8.90E-05 | 3.59E-04 |
| 5443 | 7 | F2-3 vs. S2-3 | 256491_at  | AT1G31500 | HESP identified based on similarity to nocturnins and presence circadian regulatory elements in the promoter. It functions as a Mg(II) dependent poly(A) exoribonuclease.It is under circadian regulation and expressed at night. Knockdowns affect the regulation of circadian genes CCA1 and TOC1. Encodes protein involved in suppression of apoptosis. Complements a mammalian apoptosis suppressor mutation.                                                                                                                                                                                                                                                                                                                                                          | 14.64  | 26.77  | 0.55 | 2.83E-04 | 8.51E-04 |
| 5444 | 7 | F2-3 vs. S2-3 | 245791_at  | AT1G32210 | tRNA (5-methylaminomethyl-2-thiouridylate)-methyltransferase;(source:Araport11)                                                                                                                                                                                                                                                                                                                                                                                                                                                                                                                                                                                                                                                                                            | 162.38 | 293.27 | 0.55 | 5.43E-04 | 1.41E-03 |
| 5445 | 7 | F2-3 vs. S2-3 | 265139_at  | AT1G51310 | Putative C3HC4 zinc-finger ubiquitin E3 ligase, negative regulator in ABA and drought stress response.                                                                                                                                                                                                                                                                                                                                                                                                                                                                                                                                                                                                                                                                     | 47.84  | 87.06  | 0.55 | 3.15E-04 | 9.27E-04 |
| 5446 | 7 | F2-3 vs. S2-3 | 260042_at  | AT1G68820 | hypothetical protein;(source:Araport11)                                                                                                                                                                                                                                                                                                                                                                                                                                                                                                                                                                                                                                                                                                                                    | 53.28  | 96.21  | 0.55 | 2.33E-04 | 7.37E-04 |
| 5447 | 7 | F2-3 vs. S2-3 | 267444_at  | AT2G19180 | Encodes hydrophilic protein lacking Cys residues that is expressed in response to drought stress, light stress and treatment with plant-growth-promoting rhizobacteria (Paenibacillus polymyxa), possibly revealing a connection between responses to biotic and abiotic stress. Also identified as a CTC Interacting Domain (CID) protein in a yeast two hybrid screen using the PAB2 protein as bait. Contains PAM2 like domain which mediates interaction with PABC domain in PAB2. encodes an SC35-like splicing factor of 30 kD that is localized to the nuclear specks. Barta et al (2010) have proposed a nomenclature for Serine/Arginine-Rich Protein Splicing Factors (SR proteins): Plant Cell. 2010, 22:2926.                                                  | 282.27 | 513.71 | 0.55 | 8.47E-04 | 1.99E-03 |
| 5449 | 7 | F2-3 vs. S2-3 | 256649_at  | AT3G13570 | NAD(P)H-quinone oxidoreductase subunit, putative (DUF581);(source:Araport11)                                                                                                                                                                                                                                                                                                                                                                                                                                                                                                                                                                                                                                                                                               | 181.92 | 332.51 | 0.55 | 1.28E-04 | 4.68E-04 |
| 5450 | 7 | F2-3 vs. S2-3 | 256927_at  | AT3G22550 | dsRNA-binding protein 3;(source:Araport11)                                                                                                                                                                                                                                                                                                                                                                                                                                                                                                                                                                                                                                                                                                                                 | 135.53 | 246.84 | 0.55 | 8.23E-04 | 1.95E-03 |
| 5451 | 7 | F2-3 vs. S2-3 | 256980_at  | AT3G26932 | Encodes a proline oxidase that is predicted to localize to the inner mitochondrial membrane, its mRNA expression induced by high levels of ABA and by osmotic stress. The promoter contains an L-proline-inducible element.                                                                                                                                                                                                                                                                                                                                                                                                                                                                                                                                                | 10.78  | 19.66  | 0.55 | 9.27E-05 | 3.70E-04 |
| 5452 | 7 | F2-3 vs. S2-3 | 257315_at  | AT3G30775 | Leucine-rich repeat protein kinase family protein;(source:Araport11)                                                                                                                                                                                                                                                                                                                                                                                                                                                                                                                                                                                                                                                                                                       | 89.31  | 162.54 | 0.55 | 6.65E-05 | 2.88E-04 |
| 5453 | 7 | F2-3 vs. S2-3 | 252450_s_a | AT3G47580 | Encodes a member of the TRM superfamily, that plays a role in preprophase band formation during plant cell division and controls the robustness of the orientation of that cell division. Its transcription is regulated by the cell cycle and peaks at the G2/M transition. Mutations confer hypersensitivity to glucose and sucrose and augments sensitivity to cytokinin, ethylene, ABA and auxin. Encodes a nuclear WD40 protein that is imported into the nucleus. Essential for plant innate immunity. Interacts with MOS4 and AtCDC5. It is also predicted to have two DWD motifs. It can bind to DDB1a in Y2H assays, and DDB1b in co-IP assays, and may be involved in the formation of a CUL4-based E3 ubiquitin ligase, and may affect the stability of AKIN10. | 9.35   | 16.98  | 0.55 | 6.25E-04 | 1.57E-03 |
| 5454 | 7 | F2-3 vs. S2-3 | 251527_at  | AT3G58650 | Ubiquitin-like superfamily protein;(source:Araport11)                                                                                                                                                                                                                                                                                                                                                                                                                                                                                                                                                                                                                                                                                                                      | 27.21  | 49.35  | 0.55 | 6.93E-04 | 1.70E-03 |
| 5455 | 7 | F2-3 vs. S2-3 | 245358_at  | AT4G15900 | Encodes a member of the mitochondrial transcription termination factor family. MTERF6 is localized to both the mitochondria and chloroplast. It is required for ILE tRNA maturation during chloroplast development. Loss of function of MTERF6 results in plants with defective chloroplasts or reduced rate of photosynthesis when MTERF6 expression is low.                                                                                                                                                                                                                                                                                                                                                                                                              | 18.72  | 33.81  | 0.55 | 2.08E-04 | 6.81E-04 |
| 5456 | 7 | F2-3 vs. S2-3 | 254268_at  | AT4G23040 | Part of multi-protein complex, acting as guanine nucleotide exchange factors (GEFs) and possibly as tethers, regulating intracellular trafficking.                                                                                                                                                                                                                                                                                                                                                                                                                                                                                                                                                                                                                         | 31.56  | 57.41  | 0.55 | 3.08E-04 | 9.11E-04 |
| 5457 | 7 | F2-3 vs. S2-3 | 253028_at  | AT4G38160 | transmembrane protein;(source:Araport11)                                                                                                                                                                                                                                                                                                                                                                                                                                                                                                                                                                                                                                                                                                                                   | 16.98  | 30.71  | 0.55 | 7.98E-05 | 3.31E-04 |
| 5458 | 7 | F2-3 vs. S2-3 | 246501_at  | AT5G16280 | RING/U-box superfamily protein;(source:Araport11)                                                                                                                                                                                                                                                                                                                                                                                                                                                                                                                                                                                                                                                                                                                          | 14.94  | 26.97  | 0.55 | 8.77E-04 | 2.05E-03 |
| 5459 | 7 | F2-3 vs. S2-3 | 250027_at  | AT5G18250 | Fe(3+) dicitrate transport system permease;(source:Araport11)                                                                                                                                                                                                                                                                                                                                                                                                                                                                                                                                                                                                                                                                                                              | 30.21  | 55.31  | 0.55 | 6.90E-04 | 1.70E-03 |
| 5460 | 7 | F2-3 vs. S2-3 | 246135_at  | AT5G20885 | Glutamyl/glutaminyl-tRNA synthetase, class Ic;(source:Araport11)                                                                                                                                                                                                                                                                                                                                                                                                                                                                                                                                                                                                                                                                                                           | 40.15  | 72.63  | 0.55 | 2.99E-04 | 8.93E-04 |
| 5461 | 7 | F2-3 vs. S2-3 | 246026_at  | AT5G21070 | Tetratricopeptide repeat (TPR)-like superfamily protein;(source:Araport11)                                                                                                                                                                                                                                                                                                                                                                                                                                                                                                                                                                                                                                                                                                 | 133.33 | 242.41 | 0.55 | 8.57E-04 | 2.01E-03 |
| 5462 | 7 | F2-3 vs. S2-3 | 246845_at  | AT5G26710 | A member of ARF GAP domain (AGD), A thaliana has 15 members, grouped into four classes.                                                                                                                                                                                                                                                                                                                                                                                                                                                                                                                                                                                                                                                                                    | 13.26  | 24.06  | 0.55 | 1.44E-04 | 5.12E-04 |
| 5463 | 7 | F2-3 vs. S2-3 | 249723_at  | AT5G35430 | AGD14 belongs to the class 4, together with AGD15.                                                                                                                                                                                                                                                                                                                                                                                                                                                                                                                                                                                                                                                                                                                         | 33.69  | 62     | 0.54 | 8.18E-04 | 1.94E-03 |
| 5464 | 7 | F2-3 vs. S2-3 | 264796_at  | AT1G08680 | Core-2/l-branching beta-1,6-N-acetylglucosaminyltransferase family protein;(source:Araport11)                                                                                                                                                                                                                                                                                                                                                                                                                                                                                                                                                                                                                                                                              | 25.23  | 46.41  | 0.54 | 6.34E-04 | 1.59E-03 |
| 5465 | 7 | F2-3 vs. S2-3 | 257422_at  | AT1G11940 |                                                                                                                                                                                                                                                                                                                                                                                                                                                                                                                                                                                                                                                                                                                                                                            |        |        |      |          |          |

|      |   |               |           |           |                                                                                                                                                                                                                                                                                                                                                                                         |        |        |      |          |          |
|------|---|---------------|-----------|-----------|-----------------------------------------------------------------------------------------------------------------------------------------------------------------------------------------------------------------------------------------------------------------------------------------------------------------------------------------------------------------------------------------|--------|--------|------|----------|----------|
|      |   |               |           |           | Encodes a member of the Alfin1-like family of nuclear-localized PHD (plant homeodomain) domain containing proteins. All AL proteins except AL3 bind to di- or trimethylated histone H3 (H3K4me3/2). Members of this family include: AT5G05610 (AL1), AT3G11200 (AL2), AT3G42790 (AL3), AT5G26210 (AL4), AT5G20510 (AL5), AT2G02470 (AL6), AT1G14510 (AL7).                              | 174.06 | 324    | 0.54 | 1.15E-04 | 4.35E-04 |
| 5466 | 7 | F2-3 vs. S2-3 | 261486_at | AT1G14510 | U3 small nucleolar RNA-associated protein;(source:Araport11)                                                                                                                                                                                                                                                                                                                            | 93.83  | 175.1  | 0.54 | 7.51E-04 | 1.81E-03 |
| 5467 | 7 | F2-3 vs. S2-3 | 259406_at | AT1G17690 | serine carboxypeptidase-like 45;(source:Araport11)                                                                                                                                                                                                                                                                                                                                      | 44.68  | 82.6   | 0.54 | 6.26E-04 | 1.58E-03 |
| 5468 | 7 | F2-3 vs. S2-3 | 259599_at | AT1G28110 |                                                                                                                                                                                                                                                                                                                                                                                         |        |        |      |          |          |
| 5469 | 7 | F2-3 vs. S2-3 | 262958_at | AT1G54410 | Encodes a KS-type dehydrin can reduce the formation of reactive oxygen species (ROS) from Cu.                                                                                                                                                                                                                                                                                           | 309.66 | 577.43 | 0.54 | 3.98E-04 | 1.11E-03 |
| 5470 | 7 | F2-3 vs. S2-3 | 256217_at | AT1G56320 | hypothetical protein;(source:Araport11)                                                                                                                                                                                                                                                                                                                                                 | 23.1   | 42.5   | 0.54 | 6.07E-04 | 1.54E-03 |
|      |   |               |           |           | RMB25 is an alternative splicing factor involved in mediation of abiotic stress response and ABA response. Its expression is modulated by a variety of stressors and it in turn appears to affect the ratio of splice variants of stress responsive genes such as HAB1.2/HAB1.1.                                                                                                        | 28.22  | 51.89  | 0.54 | 1.03E-04 | 4.00E-04 |
| 5471 | 7 | F2-3 vs. S2-3 | 264218_at | AT1G60200 | Encodes COPPER AMINE OXIDASE1 (CuAO1). Contributes to abscisic acid- and polyamine-induced nitric oxide biosynthesis and abscisic acid signal transduction.                                                                                                                                                                                                                             | 22.91  | 42.65  | 0.54 | 8.92E-04 | 2.08E-03 |
| 5472 | 7 | F2-3 vs. S2-3 | 262667_at | AT1G62810 | Vicinal oxygen chelate (VOC) superfamily member.                                                                                                                                                                                                                                                                                                                                        | 23.05  | 42.5   | 0.54 | 1.82E-04 | 6.14E-04 |
| 5473 | 7 | F2-3 vs. S2-3 | 262338_at | AT1G64185 |                                                                                                                                                                                                                                                                                                                                                                                         |        |        |      |          |          |
|      |   |               |           |           | Plasma membrane LRR receptor-like serine threonine kinase expressed during embryogenesis in locules until stage 6 anthers, with higher expression in the tapetal cell layer. SERK1 and SERK2 receptor kinases function redundantly as an important control point for sporophytic development controlling male gametophyte production. SERK1 interacts with and transphosphorylates EMS1 | 16.84  | 31.11  | 0.54 | 9.18E-04 | 2.13E-03 |
| 5474 | 7 | F2-3 vs. S2-3 | 261521_at | AT1G71830 |                                                                                                                                                                                                                                                                                                                                                                                         |        |        |      |          |          |
|      |   |               |           |           | Encodes a cyclin-dependent protein kinase involved in regulation of the G2/M transition of the mitotic cell cycle. Specifically binds to the cyclin CYCD4;1, expressed in shoot meristem, young leaves and vascular tissue during the G2/M phase. Required for proper organization of the shoot apical meristem and for hormone signaling.                                              | 53.01  | 98.24  | 0.54 | 3.10E-04 | 9.14E-04 |
| 5475 | 7 | F2-3 vs. S2-3 | 259978_at | AT1G76540 | Encodes a nuclear localized target of E2Fa-DPa, transcription factors controlling cell cycle progression. Required for sister chromatid cohesion and DNA repair.                                                                                                                                                                                                                        | 50.62  | 94.4   | 0.54 | 5.49E-04 | 1.43E-03 |
| 5476 | 7 | F2-3 vs. S2-3 | 255874_at | AT2G40550 | encodes spliceosomal protein U1A                                                                                                                                                                                                                                                                                                                                                        | 247.48 | 460.53 | 0.54 | 1.11E-04 | 4.24E-04 |
| 5477 | 7 | F2-3 vs. S2-3 | 245124_at | AT2G47580 | Calossin-like protein required for polar auxin transport. Involved in regulating sugar response and C/N balance.                                                                                                                                                                                                                                                                        | 195.09 | 364.3  | 0.54 | 6.61E-05 | 2.87E-04 |
| 5478 | 7 | F2-3 vs. S2-3 | 259128_at | AT3G02260 | Encodes a protein with little sequence identity with any other protein of known structure or function. Part of this protein shows a 42% sequence identity with the C-terminal domain of the 32-kD human thioredoxin-like protein.                                                                                                                                                       | 78.43  | 146.28 | 0.54 | 7.73E-04 | 1.85E-03 |
| 5479 | 7 | F2-3 vs. S2-3 | 258793_at | AT3G04780 | Encodes a nuclear-localized MAP kinase phosphatase. Plants with reduced levels of MKP2 transcripts are hypersensitive to ozone and ozone-mediated activation of MPK3 and MPK6 is prolonged in these plants.                                                                                                                                                                             | 42.86  | 79.55  | 0.54 | 4.80E-05 | 2.30E-04 |
| 5480 | 7 | F2-3 vs. S2-3 | 256397_at | AT3G06110 | Ypt/Rab-GAP domain of gyp1p superfamily protein;(source:Araport11)                                                                                                                                                                                                                                                                                                                      | 45.31  | 84.09  | 0.54 | 4.37E-04 | 1.19E-03 |
| 5481 | 7 | F2-3 vs. S2-3 | 258636_at | AT3G07890 | RING/U-box superfamily protein;(source:Araport11)                                                                                                                                                                                                                                                                                                                                       | 49.58  | 91.16  | 0.54 | 8.15E-05 | 3.36E-04 |
| 5482 | 7 | F2-3 vs. S2-3 | 252464_at | AT3G47160 | proline-rich family protein;(source:Araport11)                                                                                                                                                                                                                                                                                                                                          | 15.3   | 28.31  | 0.54 | 3.95E-04 | 1.10E-03 |
| 5483 | 7 | F2-3 vs. S2-3 | 245479_at | AT4G16140 | RNA helicase family protein;(source:Araport11)                                                                                                                                                                                                                                                                                                                                          | 46.42  | 85.44  | 0.54 | 6.85E-04 | 1.69E-03 |
| 5484 | 7 | F2-3 vs. S2-3 | 254675_at | AT4G18465 | Encodes a hybrid proline-rich protein that contains two tandem PRD-8CMs (proline-rich domain-eight cysteine motif) that is involved in systemic acquired resistance.                                                                                                                                                                                                                    | 16.27  | 30.15  | 0.54 | 6.21E-05 | 2.75E-04 |
| 5485 | 7 | F2-3 vs. S2-3 | 254314_at | AT4G22470 | Got1/Stt2-like vesicle transport protein family;(source:Araport11)                                                                                                                                                                                                                                                                                                                      | 80.86  | 149.72 | 0.54 | 7.50E-05 | 3.15E-04 |
| 5486 | 7 | F2-3 vs. S2-3 | 253967_at | AT4G26550 | interacts with H+-ATPase, and regulates its activity The mRNA is cell-to-cell mobile.                                                                                                                                                                                                                                                                                                   | 237.09 | 437.71 | 0.54 | 9.35E-05 | 3.72E-04 |
| 5487 | 7 | F2-3 vs. S2-3 | 253868_at | AT4G27500 | Vacuolar import/degradation, Vid27-related protein;(source:Araport11)                                                                                                                                                                                                                                                                                                                   | 210.89 | 394.04 | 0.54 | 6.44E-04 | 1.61E-03 |
| 5488 | 7 | F2-3 vs. S2-3 | 253357_at | AT4G33400 |                                                                                                                                                                                                                                                                                                                                                                                         |        |        |      |          |          |
|      |   |               |           |           | ANT is required for control of cell proliferation and encodes a putative transcriptional regulator similar to AP2. Loss of function alleles have reduced fertility, abnormal ovules and abnormal lateral organs. Expressed in the chalaza, floral organ primordia, and lateral shoot organ primordia.                                                                                   | 35.77  | 65.94  | 0.54 | 5.75E-05 | 2.62E-04 |
| 5489 | 7 | F2-3 vs. S2-3 | 253010_at | AT4G37750 | Regulates growth and cell numbers during organogenesis.                                                                                                                                                                                                                                                                                                                                 | 21.01  | 39.21  | 0.54 | 2.72E-04 | 8.27E-04 |
| 5490 | 7 | F2-3 vs. S2-3 | 250586_at | AT5G07630 | lipid transporter;(source:Araport11)                                                                                                                                                                                                                                                                                                                                                    | 40.95  | 75.75  | 0.54 | 2.22E-04 | 7.12E-04 |
| 5491 | 7 | F2-3 vs. S2-3 | 245984_at | AT5G13090 | hypothetical protein;(source:Araport11)                                                                                                                                                                                                                                                                                                                                                 |        |        |      |          |          |



|      |   |               |           |           |                                                                                                                                                                                                                                                                                                                                                                                                                                                                                                                                                                                                                                                                                                                                                                                                                                                     |        |        |      |          |          |
|------|---|---------------|-----------|-----------|-----------------------------------------------------------------------------------------------------------------------------------------------------------------------------------------------------------------------------------------------------------------------------------------------------------------------------------------------------------------------------------------------------------------------------------------------------------------------------------------------------------------------------------------------------------------------------------------------------------------------------------------------------------------------------------------------------------------------------------------------------------------------------------------------------------------------------------------------------|--------|--------|------|----------|----------|
|      |   |               |           |           | Encodes a voltage-dependent anion channel (VDAC: AT3G01280/VDAC1, AT5G67500/VDAC2, AT5G15090/VDAC3, AT5G57490/VDAC4, AT5G15090/VDAC5). VDACS are reported to be porin-type, beta-barrel diffusion pores. They are prominently localized in the outer mitochondrial membrane and are involved in metabolite exchange between the organelle and the cytosol. Purified                                                                                                                                                                                                                                                                                                                                                                                                                                                                                 |        |        |      |          |          |
| 5492 | 7 | F2-3 vs. S2-3 | 246546_at | AT5G15090 | VDAC3 is shown to have voltage-dependent anion channel activity.                                                                                                                                                                                                                                                                                                                                                                                                                                                                                                                                                                                                                                                                                                                                                                                    | 30.92  | 57.21  | 0.54 | 1.55E-04 | 5.44E-04 |
| 5493 | 7 | F2-3 vs. S2-3 | 246443_at | AT5G17620 | nuclear matrix protein;(source:Araport11)                                                                                                                                                                                                                                                                                                                                                                                                                                                                                                                                                                                                                                                                                                                                                                                                           | 103.83 | 192.17 | 0.54 | 1.69E-04 | 5.79E-04 |
| 5494 | 7 | F2-3 vs. S2-3 | 249954_at | AT5G18920 | Cox19-like CHCH family protein;(source:Araport11)                                                                                                                                                                                                                                                                                                                                                                                                                                                                                                                                                                                                                                                                                                                                                                                                   | 10.51  | 19.3   | 0.54 | 7.25E-04 | 1.76E-03 |
| 5495 | 7 | F2-3 vs. S2-3 | 249936_at | AT5G22450 | spectrin beta chain, brain;(source:Araport11)<br>encodes a protein whose sequence is similar to actin-related proteins (ARPs) in other organisms.                                                                                                                                                                                                                                                                                                                                                                                                                                                                                                                                                                                                                                                                                                   | 37.79  | 69.43  | 0.54 | 6.37E-04 | 1.60E-03 |
| 5496 | 7 | F2-3 vs. S2-3 | 249127_at | AT5G43500 | Member of nuclear ARP family of genes.                                                                                                                                                                                                                                                                                                                                                                                                                                                                                                                                                                                                                                                                                                                                                                                                              | 13.77  | 25.44  | 0.54 | 3.87E-04 | 1.09E-03 |
| 5497 | 7 | F2-3 vs. S2-3 | 248933_at | AT5G46070 | Guanylate-binding family protein;(source:Araport11)                                                                                                                                                                                                                                                                                                                                                                                                                                                                                                                                                                                                                                                                                                                                                                                                 | 22.12  | 41     | 0.54 | 6.17E-04 | 1.56E-03 |
|      |   |               |           |           | Membrane-bound protein serine/threonine kinase that functions as blue light photoreceptor in redundancy with PHO1. Involved in stomatal opening, chloroplast movement and phototropism. Mediates blue light-induced growth enhancements. PHOT1 and PHOT2 mediate blue light-dependent activation of the plasma membrane H <sup>+</sup> -ATPase in guard cell protoplasts. PHOT2 possesses two LOV (LOV1 and LOV2, for light-oxygen-voltage-sensing) domains involved in FMN-binding and a C-terminus forming a serine/threonine kinase domain. LOV2 acts as an inhibitor of phototropin kinase in the dark, and light cancels the inhibition through cysteine-FMN adduct formation. LOV1 in contrast acts as an attenuator of photoactivation. Localized to the Golgi apparatus under the induction of blue light. The mRNA is cell-to-cell mobile. |        |        |      |          |          |
| 5498 | 7 | F2-3 vs. S2-3 | 247853_at | AT5G58140 |                                                                                                                                                                                                                                                                                                                                                                                                                                                                                                                                                                                                                                                                                                                                                                                                                                                     | 41.99  | 77.2   | 0.54 | 5.15E-04 | 1.35E-03 |
|      |   |               |           |           | Encodes a chloroplast branched-chain amino acid aminotransferase, can complement the yeast leu/iso-leu/val auxotrophy mutant. Note that the AT5G65780.2 gene model (TAIR10) has been obsoleted due to the lack of experimental support. The mRNA is cell-to-cell mobile.                                                                                                                                                                                                                                                                                                                                                                                                                                                                                                                                                                            |        |        |      |          |          |
| 5499 | 7 | F2-3 vs. S2-3 | 247158_at | AT5G65780 |                                                                                                                                                                                                                                                                                                                                                                                                                                                                                                                                                                                                                                                                                                                                                                                                                                                     | 16.05  | 29.59  | 0.54 | 7.74E-04 | 1.85E-03 |
|      |   |               |           |           | TRAPPIII complex protein which regulates TGN integrity, by altered TGN/EE association of several residents, including SYNTAXIN OF PLANTS 61 (SYP61), and altered vesicle morphology. Involved in regulation of endosomal function and salt stress response.                                                                                                                                                                                                                                                                                                                                                                                                                                                                                                                                                                                         |        |        |      |          |          |
| 5500 | 7 | F2-3 vs. S2-3 | 247112_at | AT5G65950 |                                                                                                                                                                                                                                                                                                                                                                                                                                                                                                                                                                                                                                                                                                                                                                                                                                                     | 286.3  | 533.85 | 0.54 | 8.04E-05 | 3.33E-04 |
| 5501 | 7 | F2-3 vs. S2-3 | 247049_at | AT5G66440 | tRNA-methyltransferase non-catalytic subunit trm6MTase subunit;(source:Araport11)<br>Encodes a homolog of the mammalian protein CstF77, a polyadenylation factor subunit. RNA                                                                                                                                                                                                                                                                                                                                                                                                                                                                                                                                                                                                                                                                       | 14     | 26.11  | 0.54 | 8.73E-05 | 3.53E-04 |
| 5502 | 7 | F2-3 vs. S2-3 | 259401_at | AT1G17760 | 3&#8242;-end?processing factor of antisense FLC transcript. Mediates silencing of the floral repressor gene FLC. Member of CstF complex.                                                                                                                                                                                                                                                                                                                                                                                                                                                                                                                                                                                                                                                                                                            | 33.41  | 63     | 0.53 | 8.30E-05 | 3.40E-04 |
|      |   |               |           |           | Essential for formation and asymmetric growth of the ovule outer integument. Member of the YABBY protein family of putative transcription factors that contain apparent Cys(2)-Cys(2) zinc-finger domains and regions of similarity to the high mobility group (HMG) transcription factors. INO                                                                                                                                                                                                                                                                                                                                                                                                                                                                                                                                                     |        |        |      |          |          |
| 5503 | 7 | F2-3 vs. S2-3 | 262989_at | AT1G23420 | may be required for polarity determination in the central part of the ovule.                                                                                                                                                                                                                                                                                                                                                                                                                                                                                                                                                                                                                                                                                                                                                                        | 22.49  | 42.76  | 0.53 | 4.78E-04 | 1.28E-03 |
| 5504 | 7 | F2-3 vs. S2-3 | 259996_at | AT1G67910 | hypothetical protein;(source:Araport11)                                                                                                                                                                                                                                                                                                                                                                                                                                                                                                                                                                                                                                                                                                                                                                                                             | 18.82  | 35.34  | 0.53 | 8.69E-05 | 3.52E-04 |
| 5505 | 7 | F2-3 vs. S2-3 | 260279_at | AT1G80420 | Encodes a component of plant break excision repair and functions at several stages during active DNA demethylation in Arabidopsis.                                                                                                                                                                                                                                                                                                                                                                                                                                                                                                                                                                                                                                                                                                                  | 13.07  | 24.76  | 0.53 | 6.46E-05 | 2.82E-04 |
|      |   |               |           |           | encodes a nicotinamidase that converts nicotinamide into nicotinic acid. As such the encoded enzyme is involved in the pyridine nucleotide salvage pathway which may be connected to the de novo NAD biosynthesis through the ABA signaling pathway.                                                                                                                                                                                                                                                                                                                                                                                                                                                                                                                                                                                                |        |        |      |          |          |
| 5506 | 7 | F2-3 vs. S2-3 | 265343_at | AT2G22570 | Encodes KCS11, a member of the 3-ketoacyl-CoA synthase family involved in the biosynthesis of VLCFA (very long chain fatty acids).                                                                                                                                                                                                                                                                                                                                                                                                                                                                                                                                                                                                                                                                                                                  | 32.77  | 61.36  | 0.53 | 4.00E-04 | 1.11E-03 |
| 5507 | 7 | F2-3 vs. S2-3 | 267606_at | AT2G26640 |                                                                                                                                                                                                                                                                                                                                                                                                                                                                                                                                                                                                                                                                                                                                                                                                                                                     | 19.87  | 37.46  | 0.53 | 5.63E-05 | 2.58E-04 |
| 5508 | 7 | F2-3 vs. S2-3 | 258855_at | AT3G02070 | Cysteine proteinases superfamily protein;(source:Araport11)                                                                                                                                                                                                                                                                                                                                                                                                                                                                                                                                                                                                                                                                                                                                                                                         | 50.47  | 96.04  | 0.53 | 2.25E-04 | 7.17E-04 |
| 5509 | 7 | F2-3 vs. S2-3 | 258665_at | AT3G08710 | Associated to plasma membrane. Moves cell to cell, suggesting a role in intercellular communication.                                                                                                                                                                                                                                                                                                                                                                                                                                                                                                                                                                                                                                                                                                                                                | 82.59  | 155.17 | 0.53 | 1.01E-04 | 3.95E-04 |

|      |   |               |             |           |                                                                                                                                                                                                                                                                                                                                                                                                                      |        |         |      |          |          |
|------|---|---------------|-------------|-----------|----------------------------------------------------------------------------------------------------------------------------------------------------------------------------------------------------------------------------------------------------------------------------------------------------------------------------------------------------------------------------------------------------------------------|--------|---------|------|----------|----------|
| 5510 | 7 | F2-3 vs. S2-3 | 259259_at   | AT3G11540 | Encodes a N-acetyl glucosamine transferase that may glycosylate other molecules involved in GA signaling. Contains a tetratricopeptide repeat region, and a novel carboxy-terminal region. SPY acts as both a repressor of GA responses and as a positive regulation of cytokinin signalling. SPY may be involved in reducing ROS accumulation in response to stress.                                                | 78.93  | 150.28  | 0.53 | 5.84E-05 | 2.64E-04 |
| 5511 | 7 | F2-3 vs. S2-3 | 256570_at   | AT3G19540 | glutamyl-tRNA (Gln) amidotransferase subunit A (DUF620);(source:Araport11)<br>Encodes a cyanase that catalyzes the bicarbonate-dependent breakdown of cyanate to ammonia and bicarbonate. CYN forms a hexadecamer and is believed to be a cytosolic protein. Long-term exposure to NaCl increases CYN transcript levels. It is also expressed at higher levels in flowers relative to stems, roots, and seedlings.   | 97.89  | 185.36  | 0.53 | 1.57E-04 | 5.51E-04 |
| 5512 | 7 | F2-3 vs. S2-3 | 257177_at   | AT3G23490 |                                                                                                                                                                                                                                                                                                                                                                                                                      | 18.17  | 34.22   | 0.53 | 5.95E-05 | 2.67E-04 |
| 5513 | 7 | F2-3 vs. S2-3 | 258132_at   | AT3G24550 | Encodes a member of the proline-rich extensin-like receptor kinase (PERK) family. This family consists of 15 predicted receptor kinases (PMID: 15653807). The mRNA is cell-to-cell mobile.                                                                                                                                                                                                                           | 80.99  | 151.74  | 0.53 | 1.90E-04 | 6.33E-04 |
| 5514 | 7 | F2-3 vs. S2-3 | 257835_at   | AT3G25180 | Encodes a cytochrome P450 monooxygenase (CYP82G1) that catalyzes the production of two volatile homoterpenes, TMTT and DMNT, although it is only likely to produce TMTT in planta. TMTT can be involved in attracting predatory insects to protect Arabidopsis plants from herbivorous pests. Homoterpene synthesis is also stimulated by fungal elicitors which increase the transcript levels of CYP82G1.          | 41.6   | 78.22   | 0.53 | 7.67E-04 | 1.84E-03 |
| 5515 | 7 | F2-3 vs. S2-3 | 252683_at   | AT3G44380 | Late embryogenesis abundant (LEA) hydroxyproline-rich glycoprotein family;(source:Araport11)                                                                                                                                                                                                                                                                                                                         | 15.5   | 29.36   | 0.53 | 1.05E-04 | 4.05E-04 |
| 5516 | 7 | F2-3 vs. S2-3 | 252603_at   | AT3G45050 | transmembrane protein;(source:Araport11)                                                                                                                                                                                                                                                                                                                                                                             | 31.21  | 58.81   | 0.53 | 1.62E-04 | 5.62E-04 |
| 5517 | 7 | F2-3 vs. S2-3 | 252328_at   | AT3G48570 | secE/sec61-gamma protein transport protein;(source:Araport11)                                                                                                                                                                                                                                                                                                                                                        | 146.08 | 276.9   | 0.53 | 2.27E-04 | 7.23E-04 |
| 5518 | 7 | F2-3 vs. S2-3 | 251990_at   | AT3G53320 | Encodes a microtubule-associated protein track growing microtubule plus ends.                                                                                                                                                                                                                                                                                                                                        | 15.38  | 29.2    | 0.53 | 7.61E-05 | 3.18E-04 |
| 5519 | 7 | F2-3 vs. S2-3 | 251795_at   | AT3G55390 | Uncharacterized protein family (UPF0497);(source:Araport11)                                                                                                                                                                                                                                                                                                                                                          | 28.61  | 54.33   | 0.53 | 3.40E-04 | 9.84E-04 |
| 5520 | 7 | F2-3 vs. S2-3 | 245380_at   | AT4G17760 | PCNA domain-containing protein;(source:Araport11)                                                                                                                                                                                                                                                                                                                                                                    | 22.12  | 42.03   | 0.53 | 3.40E-04 | 9.84E-04 |
| 5521 | 7 | F2-3 vs. S2-3 | 253900_at   | AT4G27130 | Translation initiation factor SU11 family protein;(source:Araport11)                                                                                                                                                                                                                                                                                                                                                 | 331.59 | 625.26  | 0.53 | 1.37E-04 | 4.93E-04 |
| 5522 | 7 | F2-3 vs. S2-3 | 252824_at   | AT4G40030 | Histone superfamily protein;(source:Araport11)                                                                                                                                                                                                                                                                                                                                                                       | 1287   | 2438.77 | 0.53 | 5.14E-04 | 1.35E-03 |
| 5523 | 7 | F2-3 vs. S2-3 | 250881_at   | AT5G04080 | cysteine-rich TM module stress tolerance protein;(source:Araport11)<br>Encodes a DNA glycosylase DEMETER (DME). Responsible for endosperm maternal-allele-specific hypomethylation at the MEDEA (MEA) gene. DME can excise 5-methylcytosine in vitro and when expressed in E. coli. DME establishes MEA imprinting by removing 5-methylcytosine to activate the maternal allele.                                     | 10.55  | 20.08   | 0.53 | 2.34E-04 | 7.38E-04 |
| 5524 | 7 | F2-3 vs. S2-3 | 250836_at   | AT5G04560 | mental retardation GTPase activating protein;(source:Araport11)                                                                                                                                                                                                                                                                                                                                                      | 15.71  | 29.72   | 0.53 | 7.47E-04 | 1.80E-03 |
| 5525 | 7 | F2-3 vs. S2-3 | 246487_at   | AT5G16030 | smr (Small MutS Related) domain-containing protein;(source:Araport11)                                                                                                                                                                                                                                                                                                                                                | 43.22  | 81.24   | 0.53 | 4.51E-04 | 1.22E-03 |
| 5526 | 7 | F2-3 vs. S2-3 | 249841_at   | AT5G23520 | Small nuclear ribonucleoprotein family protein;(source:Araport11)                                                                                                                                                                                                                                                                                                                                                    | 16.27  | 30.69   | 0.53 | 6.79E-04 | 1.68E-03 |
| 5527 | 7 | F2-3 vs. S2-3 | 264364_at   | AT1G03330 | Encodes a chloroplast membrane protein CJD1 (Chloroplast J-like Domain 1). Predicted to contain a transit peptide, three transmembrane domains and an N-terminal J-like domain. Influences fatty acid composition of chloroplast lipids.                                                                                                                                                                             | 135.16 | 260.9   | 0.52 | 1.35E-04 | 4.87E-04 |
| 5528 | 7 | F2-3 vs. S2-3 | 264811_at   | AT1G08640 | proline-rich family protein;(source:Araport11)                                                                                                                                                                                                                                                                                                                                                                       | 74.47  | 143.1   | 0.52 | 1.23E-04 | 4.57E-04 |
| 5529 | 7 | F2-3 vs. S2-3 | 261209_at   | AT1G12810 | hypothetical protein;(source:Araport11)                                                                                                                                                                                                                                                                                                                                                                              | 62.2   | 120.19  | 0.52 | 5.43E-04 | 1.41E-03 |
| 5530 | 7 | F2-3 vs. S2-3 | 261439_at   | AT1G28395 | Galactosyltransferase family protein;(source:Araport11)                                                                                                                                                                                                                                                                                                                                                              | 34.59  | 66.99   | 0.52 | 1.59E-04 | 5.54E-04 |
| 5531 | 7 | F2-3 vs. S2-3 | 261239_at   | AT1G32930 | NADH dehydrogenase ubiquinone 1 beta subcomplex subunit 10-B-like protein (Complex I subunit NDUFS6);(source:Araport11)                                                                                                                                                                                                                                                                                              | 93.49  | 180.67  | 0.52 | 7.98E-05 | 3.31E-04 |
| 5532 | 7 | F2-3 vs. S2-3 | 260767_s_at | AT1G49140 | recA DNA recombination family protein;(source:Araport11)                                                                                                                                                                                                                                                                                                                                                             | 376.77 | 727.4   | 0.52 | 2.34E-04 | 7.38E-04 |
| 5533 | 7 | F2-3 vs. S2-3 | 264099_at   | AT1G79050 | Pentatricopeptide repeat (PPR) superfamily protein;(source:Araport11)                                                                                                                                                                                                                                                                                                                                                | 35     | 66.71   | 0.52 | 1.31E-04 | 4.79E-04 |
| 5534 | 7 | F2-3 vs. S2-3 | 262941_at   | AT1G79490 | PENTATRICOPEPTIDE REPEAT 596;(source:Araport11)                                                                                                                                                                                                                                                                                                                                                                      | 38.71  | 74.39   | 0.52 | 7.54E-04 | 1.81E-03 |
| 5535 | 7 | F2-3 vs. S2-3 | 260331_at   | AT1G80270 | Belongs to a subgroup of SGS3-like proteins that act redundantly in RNA-directed DNA methylation: AT1G15910 (FDM1), AT4G00380 (FDM2), AT3G12550 (FDM3), AT1G13790 (FDM4), AT1G80790 (FDM5).The mRNA is cell-to-cell mobile.                                                                                                                                                                                          | 335.09 | 645.53  | 0.52 | 9.56E-05 | 3.77E-04 |
| 5536 | 7 | F2-3 vs. S2-3 | 261891_at   | AT1G80790 | SNF7 family protein;(source:Araport11)                                                                                                                                                                                                                                                                                                                                                                               | 10.66  | 20.65   | 0.52 | 2.53E-04 | 7.80E-04 |
| 5537 | 7 | F2-3 vs. S2-3 | 266698_at   | AT2G19830 | Encodes a ubiquitin-activating enzyme (E1), involved in the first step in conjugating multiple ubiquitins to proteins targeted for degradation. Gene is expressed in most tissues examined. Mutant is able to revert the constitutive defense responses phenotype of snc1, which indicates the gene is involved in defense response. It also indicates that ubiquitination plays a role in plant defense signalling. | 42.32  | 80.69   | 0.52 | 8.51E-05 | 3.46E-04 |
| 5538 | 7 | F2-3 vs. S2-3 | 267301_at   | AT2G30110 |                                                                                                                                                                                                                                                                                                                                                                                                                      | 155.76 | 301.28  | 0.52 | 1.13E-04 | 4.30E-04 |

|      |   |               |            |           |                                                                                                                                                                                                                                                                                                                                                                                                                                                                     |        |         |      |          |          |
|------|---|---------------|------------|-----------|---------------------------------------------------------------------------------------------------------------------------------------------------------------------------------------------------------------------------------------------------------------------------------------------------------------------------------------------------------------------------------------------------------------------------------------------------------------------|--------|---------|------|----------|----------|
| 5539 | 7 | F2-3 vs. S2-3 | 255817_at  | AT2G33330 | Encodes a plasmodesmal protein that affects the intercellular movement of molecules through the plasmodesmata. The protein has two DUF26 domains and a single transmembrane domain.                                                                                                                                                                                                                                                                                 | 48.46  | 92.54   | 0.52 | 4.20E-05 | 2.10E-04 |
| 5540 | 7 | F2-3 vs. S2-3 | 255848_at  | AT2G33640 | DHHC-type zinc finger family protein that encodes a functional s-acyl transferase.                                                                                                                                                                                                                                                                                                                                                                                  | 19.91  | 38.51   | 0.52 | 7.84E-04 | 1.87E-03 |
| 5541 | 7 | F2-3 vs. S2-3 | 267171_at  | AT2G37590 | PEAR protein involved in the formation of a short-range concentration gradient that peaks at protophloem sieve elements, and activates gene expression that promotes radial growth. Locally promotes transcription of inhibitory HD-ZIP III genes, and thereby establishes a negative-feedback loop that forms a robust boundary that demarks the zone of cell division.                                                                                            | 43.79  | 84.61   | 0.52 | 8.18E-05 | 3.36E-04 |
| 5542 | 7 | F2-3 vs. S2-3 | 267513_at  | AT2G45620 | Nucleotidyltransferase family protein involved in transcript polyadenylation.                                                                                                                                                                                                                                                                                                                                                                                       | 161.56 | 310.62  | 0.52 | 6.98E-05 | 2.98E-04 |
| 5543 | 7 | F2-3 vs. S2-3 | 256400_at  | AT3G06140 | Paralog of LOG2 (At3g09770), a ubiquitin ligase that regulates amino acid export.                                                                                                                                                                                                                                                                                                                                                                                   | 11.88  | 22.96   | 0.52 | 2.02E-04 | 6.66E-04 |
| 5544 | 7 | F2-3 vs. S2-3 | 256286_at  | AT3G12180 | Cornichon family protein;(source:Araport11)                                                                                                                                                                                                                                                                                                                                                                                                                         | 50.47  | 97.5    | 0.52 | 7.04E-05 | 2.99E-04 |
| 5545 | 7 | F2-3 vs. S2-3 | 257051_at  | AT3G15270 | Encodes a member of the SPL (squamosa-promoter binding protein-like) gene family, a novel gene family encoding DNA binding proteins and putative transcription factors. Contains the SBP-box, which encodes the SBP-domain, required and sufficient for interaction with DNA. It is involved in regulation of flowering and vegetative phase change. Its temporal expression is regulated by the microRNA miR156. The target site for the microRNA is in the 3'UTR. | 32.65  | 62.69   | 0.52 | 3.42E-05 | 1.79E-04 |
| 5546 | 7 | F2-3 vs. S2-3 | 252190_at  | AT3G50170 | transmembrane protein, putative (DUF247);(source:Araport11)                                                                                                                                                                                                                                                                                                                                                                                                         | 10.16  | 19.64   | 0.52 | 1.72E-04 | 5.87E-04 |
| 5547 | 7 | F2-3 vs. S2-3 | 252136_at  | AT3G50770 | calmodulin-like 41;(source:Araport11)                                                                                                                                                                                                                                                                                                                                                                                                                               | 12.12  | 23.47   | 0.52 | 1.32E-04 | 4.81E-04 |
| 5548 | 7 | F2-3 vs. S2-3 | 251753_at  | AT3G55760 | hypothetical protein;(source:Araport11)                                                                                                                                                                                                                                                                                                                                                                                                                             | 48.81  | 94.03   | 0.52 | 4.91E-04 | 1.30E-03 |
| 5549 | 7 | F2-3 vs. S2-3 | 246317_at  | AT3G56900 | Encodes ALADIN, a component of the nuclear pore complex.                                                                                                                                                                                                                                                                                                                                                                                                            | 28.09  | 54.19   | 0.52 | 7.56E-04 | 1.82E-03 |
| 5550 | 7 | F2-3 vs. S2-3 | 251338_at  | AT3G60600 | Encodes VAP27 (for Vesicle-Associated Protein). VAP27 has high homology to the VAP33 family of SNARE-like proteins from animals. May be involved in vesicular transport to or from the ER.                                                                                                                                                                                                                                                                          | 400.03 | 773.13  | 0.52 | 1.05E-04 | 4.06E-04 |
| 5551 | 7 | F2-3 vs. S2-3 | 254953_at  | AT4G10925 | Located exclusively in limiting membrane of protein storage vacuoles. Binds SRC2.                                                                                                                                                                                                                                                                                                                                                                                   | 90.52  | 173.24  | 0.52 | 9.53E-05 | 3.77E-04 |
| 5552 | 7 | F2-3 vs. S2-3 | 254865_s_a | AT4G12190 | Nuclear transport factor 2 (NTF2) family protein;(source:Araport11)                                                                                                                                                                                                                                                                                                                                                                                                 | 12.63  | 24.35   | 0.52 | 6.20E-04 | 1.56E-03 |
| 5553 | 7 | F2-3 vs. S2-3 | 254340_at  | AT4G22120 | RING/U-box superfamily protein;(source:Araport11)                                                                                                                                                                                                                                                                                                                                                                                                                   | 23.99  | 45.93   | 0.52 | 6.48E-04 | 1.62E-03 |
| 5554 | 7 | F2-3 vs. S2-3 | 254088_at  | AT4G24880 | Calcium-permeable stretch activated cation channel.                                                                                                                                                                                                                                                                                                                                                                                                                 | 84.23  | 160.49  | 0.52 | 9.60E-05 | 3.78E-04 |
| 5555 | 7 | F2-3 vs. S2-3 | 254111_at  | AT4G24890 | snurportin-1 protein;(source:Araport11)                                                                                                                                                                                                                                                                                                                                                                                                                             | 35.5   | 68.87   | 0.52 | 1.01E-04 | 3.95E-04 |
| 5556 | 7 | F2-3 vs. S2-3 | 253138_at  | AT4G35490 | purple acid phosphatase 24;(source:Araport11)                                                                                                                                                                                                                                                                                                                                                                                                                       | 193.8  | 370.83  | 0.52 | 1.06E-04 | 4.08E-04 |
| 5557 | 7 | F2-3 vs. S2-3 | 246517_at  | AT5G15760 | mitochondrial ribosomal protein L11;(source:Araport11)                                                                                                                                                                                                                                                                                                                                                                                                              | 13.06  | 25.17   | 0.52 | 6.67E-05 | 2.88E-04 |
| 5558 | 7 | F2-3 vs. S2-3 | 250125_at  | AT5G16390 | Ribosomal protein PSRP-3/Ycf65;(source:Araport11)                                                                                                                                                                                                                                                                                                                                                                                                                   | 18.54  | 35.45   | 0.52 | 7.07E-05 | 3.01E-04 |
| 5559 | 7 | F2-3 vs. S2-3 | 248975_at  | AT5G45040 | Encodes for the biotin carboxyl-carrier subunit of the multi-enzyme plastidial acetyl-coenzyme A carboxylase complex.                                                                                                                                                                                                                                                                                                                                               | 19.16  | 36.66   | 0.52 | 2.39E-04 | 7.47E-04 |
| 5560 | 7 | F2-3 vs. S2-3 | 244939_at  | ATCG00065 | Encodes a Class I cytochrome c family member possessing a high structural homology with photosynthetic cytochrome c(6) from cyanobacteria, but structurally and functionally distinct through the presence of a disulfide bond.                                                                                                                                                                                                                                     | 20.28  | 39.23   | 0.52 | 3.24E-04 | 9.48E-04 |
| 5561 | 7 | F2-3 vs. S2-3 | 244940_at  | ATCG01230 | chloroplast gene encoding ribosomal protein s12. The gene is located in three distinct loci on the chloroplast genome and is transplined to make one transcript.                                                                                                                                                                                                                                                                                                    | 670.39 | 1298.13 | 0.52 | 6.27E-05 | 2.77E-04 |
| 5562 | 7 | F2-3 vs. S2-3 | 264810_at  | AT1G08750 | chloroplast gene encoding ribosomal protein s12. The gene is located in three distinct loci on the chloroplast genome and is transplined to make one transcript.                                                                                                                                                                                                                                                                                                    | 49.41  | 96.34   | 0.51 | 1.33E-04 | 4.83E-04 |
| 5563 | 7 | F2-3 vs. S2-3 | 255899_at  | AT1G17970 | GPI8/PIG-K homolog involved in stomata development. Loss of function alleles do not transmit through the pollen.                                                                                                                                                                                                                                                                                                                                                    | 20.12  | 39.7    | 0.51 | 3.46E-05 | 1.81E-04 |
| 5564 | 7 | F2-3 vs. S2-3 | 261717_at  | AT1G18400 | RING/U-box superfamily protein;(source:Araport11)                                                                                                                                                                                                                                                                                                                                                                                                                   | 13.98  | 27.41   | 0.51 | 8.51E-04 | 2.00E-03 |
| 5565 | 7 | F2-3 vs. S2-3 | 261131_at  | AT1G19835 | Encodes the brassinosteroid signaling component BEE1 (BR-ENHANCED EXPRESSION 1). Positively modulates the shade avoidance syndrome in Arabidopsis seedlings.                                                                                                                                                                                                                                                                                                        | 145.12 | 282.52  | 0.51 | 2.11E-04 | 6.85E-04 |
| 5566 | 7 | F2-3 vs. S2-3 | 260974_at  | AT1G53440 | TCS1 encodes a coiled-coil domain protein that binds to microtubules and co-localizes with the cortical microtubules. Mutants have defects in trichome branching and hypocotyl elongation. TCS1 interacts with ZWI and appears to be involved in microtubule assembly.                                                                                                                                                                                              | 13.79  | 27      | 0.51 | 4.61E-04 | 1.24E-03 |
| 5567 | 7 | F2-3 vs. S2-3 | 261354_at  | AT1G79690 | Leucine-rich repeat transmembrane protein kinase;(source:Araport11)                                                                                                                                                                                                                                                                                                                                                                                                 | 51.69  | 102.3   | 0.51 | 5.97E-05 | 2.68E-04 |
| 5568 | 7 | F2-3 vs. S2-3 | 261348_at  | AT1G79810 | nudix hydrolase homolog 3;(source:Araport11)                                                                                                                                                                                                                                                                                                                                                                                                                        | 26.18  | 51.55   | 0.51 | 1.14E-04 | 4.32E-04 |
|      |   |               |            |           | Dominant suppressor of det1 phenotypes. Encodes a peroxisomal protein essential for Arabidopsis growth. Inserted directly from the cytosol into peroxisomes.                                                                                                                                                                                                                                                                                                        |        |         |      |          |          |

|      |   |               |           |           |                                                                                                                                                                                                                                                                                                                                                                                                                                                                        |        |        |      |          |          |
|------|---|---------------|-----------|-----------|------------------------------------------------------------------------------------------------------------------------------------------------------------------------------------------------------------------------------------------------------------------------------------------------------------------------------------------------------------------------------------------------------------------------------------------------------------------------|--------|--------|------|----------|----------|
| 5569 | 7 | F2-3 vs. S2-3 | 266120_at | AT2G02070 | RAVEN is part of the network regulated by BLJUEJAY, JACKDAW, SACRECROW and SHORT-ROOT to regulate root tissue patterning through cell lineage specification and asymmetric cell division. RAVEN is directly activated by SHORT-ROOT and directly repressed by JACKDAW. C2H2 BIRD transcription factor family.                                                                                                                                                          | 72.49  | 142.04 | 0.51 | 3.35E-05 | 1.77E-04 |
| 5570 | 7 | F2-3 vs. S2-3 | 266110_at | AT2G02080 |                                                                                                                                                                                                                                                                                                                                                                                                                                                                        | 33.04  | 65.25  | 0.51 | 7.08E-04 | 1.73E-03 |
| 5571 | 7 | F2-3 vs. S2-3 | 266306_at | AT2G26970 | Polynucleotidyl transferase, ribonuclease H-like superfamily protein;(source:Araport11)<br>Encodes a nuclear-localized transcriptional activator with weak sequence similarity to basic helix-loop-helix(bHLH)-domain proteins. It promotes the production of stele cells in root meristems and is required to establish and maintain the normal vascular cell number and pattern in primary and lateral roots.                                                        | 30.22  | 58.81  | 0.51 | 2.78E-05 | 1.53E-04 |
| 5572 | 7 | F2-3 vs. S2-3 | 265629_at | AT2G27230 | Glutathione peroxidase. Functions as both a redox transducer and a scavenger in abscisic acid and drought stress responses. Interacts with ABI2 and ABI1.                                                                                                                                                                                                                                                                                                              | 118.66 | 234.23 | 0.51 | 1.19E-04 | 4.44E-04 |
| 5573 | 7 | F2-3 vs. S2-3 | 260545_at | AT2G43350 | Encodes a protein localized to phloem filaments that is required for phloem filament formation.The mRNA is cell-to-cell mobile.                                                                                                                                                                                                                                                                                                                                        | 22.4   | 44.2   | 0.51 | 1.33E-04 | 4.83E-04 |
| 5574 | 7 | F2-3 vs. S2-3 | 259166_at | AT3G01670 | Encodes a member of the GATA factor family of zinc finger transcription factors.                                                                                                                                                                                                                                                                                                                                                                                       | 18.63  | 36.3   | 0.51 | 5.65E-05 | 2.58E-04 |
| 5575 | 7 | F2-3 vs. S2-3 | 258529_at | AT3G06740 | ATP binding microtubule motor family protein;(source:Araport11)                                                                                                                                                                                                                                                                                                                                                                                                        | 12.79  | 25.23  | 0.51 | 3.69E-04 | 1.05E-03 |
| 5576 | 7 | F2-3 vs. S2-3 | 258286_at | AT3G16060 | Leucine-rich repeat (LRR) family protein;(source:Araport11)                                                                                                                                                                                                                                                                                                                                                                                                            | 13.99  | 27.59  | 0.51 | 7.19E-04 | 1.75E-03 |
| 5577 | 7 | F2-3 vs. S2-3 | 257974_at | AT3G20820 |                                                                                                                                                                                                                                                                                                                                                                                                                                                                        | 257.51 | 506.22 | 0.51 | 2.27E-04 | 7.23E-04 |
| 5578 | 7 | F2-3 vs. S2-3 | 258184_at | AT3G21510 | Encodes AHP1, one of the six Arabidopsis thaliana histidine phosphotransfer proteins (AHPs). AHPs function as redundant positive regulators of cytokinin signaling. Members of the AHP gene family include: AT3G21510 (AHP1), AT3G29350 (AHP2), AT5G39340 (AHP3), AT3G16360 (AHP4), AT1G03430 (AHP5) and AT1G80100 (AHP6). Barta et al (2010) have proposed a nomenclature for Serine/Arginine-Rich Protein Splicing Factors (SR proteins): Plant Cell. 2010, 22:2926. | 20.98  | 41.16  | 0.51 | 4.24E-04 | 1.17E-03 |
| 5579 | 7 | F2-3 vs. S2-3 | 251943_at | AT3G53500 |                                                                                                                                                                                                                                                                                                                                                                                                                                                                        | 107.31 | 211.02 | 0.51 | 1.13E-04 | 4.28E-04 |
| 5580 | 7 | F2-3 vs. S2-3 | 251714_at | AT3G56370 | LRR-RLK with distinct polar localization within the plasma membrane in different cell types of the root. Mutants show defects in cell divisions within the root ground tissue.                                                                                                                                                                                                                                                                                         | 76.1   | 148.82 | 0.51 | 4.11E-04 | 1.14E-03 |
| 5581 | 7 | F2-3 vs. S2-3 | 251413_at | AT3G60320 | bZIP domain class transcription factor (DUF630 and DUF632);(source:Araport11)                                                                                                                                                                                                                                                                                                                                                                                          | 86.09  | 169.28 | 0.51 | 3.67E-04 | 1.05E-03 |
| 5582 | 7 | F2-3 vs. S2-3 | 251391_at | AT3G60910 | S-adenosyl-L-methionine-dependent methyltransferases superfamily protein;(source:Araport11)                                                                                                                                                                                                                                                                                                                                                                            | 46.82  | 92.37  | 0.51 | 9.00E-05 | 3.62E-04 |
| 5583 | 7 | F2-3 vs. S2-3 | 254747_at | AT4G13020 | Encodes a member of the cdc2+ family of protein kinases MHK. Similar to the mak genes of rats. mak encodes a protein kinase that may play a role in spermatogenesis.                                                                                                                                                                                                                                                                                                   | 29.93  | 59.1   | 0.51 | 5.29E-05 | 2.47E-04 |
| 5584 | 7 | F2-3 vs. S2-3 | 245605_at | AT4G14300 | Belongs to a member of the RNA-binding glycine-rich (RBG) gene superfamily.                                                                                                                                                                                                                                                                                                                                                                                            | 166.91 | 324.39 | 0.51 | 1.19E-04 | 4.45E-04 |
| 5585 | 7 | F2-3 vs. S2-3 | 245254_at | AT4G14680 | Encodes one of three A. thaliana ATP-sulfurylases. APS is the first enzyme of sulfate assimilation that catalyzes the formation of adenosine-5'-phosphosulfate from ATP and sulfate.                                                                                                                                                                                                                                                                                   | 23.91  | 47.04  | 0.51 | 3.18E-05 | 1.70E-04 |
| 5586 | 7 | F2-3 vs. S2-3 | 245571_at | AT4G14695 | Uncharacterized protein family (UPF0041);(source:Araport11)                                                                                                                                                                                                                                                                                                                                                                                                            | 12.46  | 24.62  | 0.51 | 2.81E-04 | 8.45E-04 |
| 5587 | 7 | F2-3 vs. S2-3 | 245489_at | AT4G16280 | Involved in the promotion of the transition of the vegetative meristem to reproductive development. Four forms of the protein (alpha, beta, delta and gamma) are produced by alternative splicing. Involved in RNA-mediated chromatin silencing. At one point it was believed to act as an abscisic acid receptor but the paper describing that function was retracted.                                                                                                | 35.04  | 68.3   | 0.51 | 1.05E-04 | 4.05E-04 |
| 5588 | 7 | F2-3 vs. S2-3 | 254545_at | AT4G19830 | FKBP-like peptidyl-prolyl cis-trans isomerase family protein;(source:Araport11)<br>Trehalose-6-phosphate phosphatase which enhances drought tolerance by regulating stomatal apertures.                                                                                                                                                                                                                                                                                | 33.61  | 66.47  | 0.51 | 4.92E-04 | 1.30E-03 |
| 5589 | 7 | F2-3 vs. S2-3 | 250467_at | AT5G10100 | D111/G-patch domain-containing protein;(source:Araport11)                                                                                                                                                                                                                                                                                                                                                                                                              | 13.75  | 27.09  | 0.51 | 6.10E-04 | 1.55E-03 |
| 5590 | 7 | F2-3 vs. S2-3 | 246840_at | AT5G26610 | Encodes a protein involved in modification of nucleosides in tRNA. Mutants have 50% less 1-methylguanosine than wt counterparts.                                                                                                                                                                                                                                                                                                                                       | 37.17  | 73.13  | 0.51 | 3.53E-04 | 1.01E-03 |
| 5591 | 7 | F2-3 vs. S2-3 | 248757_at | AT5G47680 | Co-orthologous gene of large ribosomal subunit protein RPP1.                                                                                                                                                                                                                                                                                                                                                                                                           | 157.03 | 309.86 | 0.51 | 4.96E-04 | 1.31E-03 |
| 5592 | 7 | F2-3 vs. S2-3 | 248768_at | AT5G47700 | Encodes a protein with similarity to a lipid transfer protein that may contribute to systemic acquired resistance (SAR).                                                                                                                                                                                                                                                                                                                                               | 177.97 | 349.48 | 0.51 | 2.37E-04 | 7.45E-04 |
| 5593 | 7 | F2-3 vs. S2-3 | 248683_at | AT5G48490 |                                                                                                                                                                                                                                                                                                                                                                                                                                                                        | 12.16  | 23.97  | 0.51 | 5.38E-04 | 1.40E-03 |

|      |   |               |                 |           |                                                                                                                                                                                                                                                                                                                                                                                                                                                                                                                                                                                                                                                                                                                                                                                                                       |         |         |      |          |          |
|------|---|---------------|-----------------|-----------|-----------------------------------------------------------------------------------------------------------------------------------------------------------------------------------------------------------------------------------------------------------------------------------------------------------------------------------------------------------------------------------------------------------------------------------------------------------------------------------------------------------------------------------------------------------------------------------------------------------------------------------------------------------------------------------------------------------------------------------------------------------------------------------------------------------------------|---------|---------|------|----------|----------|
| 5594 | 7 | F2-3 vs. S2-3 | 248595_at       | AT5G49230 | Identified in a screen for mutations hypersensitive to red and blue light. Mutants have shorter hypocotyls. Encodes a nuclear localized protein with similarity to drought induced proteins. Contains a ZZ zinc finger domain which is thought to mediate protein-protein interactions. May be involved in red and blue light signal transduction.                                                                                                                                                                                                                                                                                                                                                                                                                                                                    | 28.44   | 55.6    | 0.51 | 6.92E-05 | 2.97E-04 |
| 5595 | 7 | F2-3 vs. S2-3 | 248142_at       | AT5G55040 | DNA-binding bromodomain-containing protein;(source:Araport11)                                                                                                                                                                                                                                                                                                                                                                                                                                                                                                                                                                                                                                                                                                                                                         | 34.54   | 67.54   | 0.51 | 1.11E-04 | 4.24E-04 |
| 5596 | 7 | F2-3 vs. S2-3 | 247434_at       | AT5G62575 | Encodes subunit 7 of mitochondrial complex II (succinate dehydrogenase complex) and participates in the respiratory chain. It contributes to anchoring succinate dehydrogenase to the inner mitochondrial membrane. The mRNA is cell-to-cell mobile.                                                                                                                                                                                                                                                                                                                                                                                                                                                                                                                                                                  | 34.48   | 67.23   | 0.51 | 9.93E-05 | 3.90E-04 |
| 5597 | 7 | F2-3 vs. S2-3 | 265228_s_a      | ATMG01190 | ATPase subunit 1                                                                                                                                                                                                                                                                                                                                                                                                                                                                                                                                                                                                                                                                                                                                                                                                      | 107.22  | 210.75  | 0.51 | 7.53E-04 | 1.81E-03 |
| 5598 | 7 | F2-3 vs. S2-3 | 261572_at       | AT1G01170 | ozone-responsive stress-like protein (DUF1138);(source:Araport11)<br>Encodes protein that interacts with CaMV movement protein. Colocalizes in the cytoplasm with the movement protein. Has similarity to mammalian proteins (such as the rat PRA1) which have been described as rab acceptors.                                                                                                                                                                                                                                                                                                                                                                                                                                                                                                                       | 263.28  | 528.54  | 0.5  | 3.76E-04 | 1.07E-03 |
| 5599 | 7 | F2-3 vs. S2-3 | 263660_at       | AT1G04260 | Encodes cytoplasmic ribosomal protein S15a.                                                                                                                                                                                                                                                                                                                                                                                                                                                                                                                                                                                                                                                                                                                                                                           | 54.89   | 109.95  | 0.5  | 7.22E-04 | 1.75E-03 |
| 5600 | 7 | F2-3 vs. S2-3 | 261416_at       | AT1G07770 | GNAT acetyltransferase (DUF699);(source:Araport11)                                                                                                                                                                                                                                                                                                                                                                                                                                                                                                                                                                                                                                                                                                                                                                    | 540.94  | 1082.75 | 0.5  | 1.95E-05 | 1.19E-04 |
| 5601 | 7 | F2-3 vs. S2-3 | 263255_at       | AT1G10490 |                                                                                                                                                                                                                                                                                                                                                                                                                                                                                                                                                                                                                                                                                                                                                                                                                       | 36.83   | 72.95   | 0.5  | 9.31E-04 | 2.16E-03 |
| 5602 | 7 | F2-3 vs. S2-3 | 264489_at       | AT1G27370 | In conjunction with SPL11 and SPL2, SPL10 redundantly controls proper development of lateral organs in association with shoot maturation in the reproductive phase. SPL2, SPL10, and SPL11, suppress root regeneration with age by inhibiting wound-induced auxin biosynthesis. SPL10 also controls lamina shape during vegetative development.                                                                                                                                                                                                                                                                                                                                                                                                                                                                       | 23.59   | 47.11   | 0.5  | 1.28E-04 | 4.71E-04 |
| 5603 | 7 | F2-3 vs. S2-3 | 261336_at       | AT1G44790 | ChaC-like family protein;(source:Araport11)                                                                                                                                                                                                                                                                                                                                                                                                                                                                                                                                                                                                                                                                                                                                                                           | 136.05  | 273.36  | 0.5  | 2.60E-04 | 7.98E-04 |
| 5604 | 7 | F2-3 vs. S2-3 | 256215_at       | AT1G50900 | Encodes GDC1 (Grana Deficient Chloroplast 1), an ankyrin domain containing protein required for chloroplast thylakoid grana formation. The mRNA is cell-to-cell mobile.                                                                                                                                                                                                                                                                                                                                                                                                                                                                                                                                                                                                                                               | 34.04   | 67.81   | 0.5  | 7.73E-05 | 3.23E-04 |
| 5605 | 7 | F2-3 vs. S2-3 | 259875_s_a<br>t | AT1G76680 | Encodes a member of an alpha/beta barrel fold family of FMN-containing oxidoreductases. One of the closely related 12-oxophytodienoic acid reductases. This enzyme is not expected to participate in jasmonic acid biosynthesis because during in vitro assays, it shows very little activity with the naturally occurring OPDA isomer. Shows activity towards 2,4,6-trinitrotoluene. Expressed predominately in root. Up-regulated by senescence and jasmonic acid. Induced by salicylic acid. Independent of NPR1 for their induction by salicylic acid. Predicted to be a cytosolic protein. Encodes a member of the exocyst complex gene family. The exocyst is a protein complex involved in tethering vesicles to the plasma membrane during regulated or polarized secretion. The mRNA is cell-to-cell mobile. | 151.46  | 300.96  | 0.5  | 3.27E-04 | 9.53E-04 |
| 5606 | 7 | F2-3 vs. S2-3 | 256329_at       | AT1G76850 | Regulator of chromosome condensation (RCC1) family with FYVE zinc finger domain-containing protein;(source:Araport11)                                                                                                                                                                                                                                                                                                                                                                                                                                                                                                                                                                                                                                                                                                 | 59.24   | 118.83  | 0.5  | 6.15E-04 | 1.56E-03 |
| 5607 | 7 | F2-3 vs. S2-3 | 264961_at       | AT1G76950 | alpha/beta-Hydrolases superfamily protein;(source:Araport11)                                                                                                                                                                                                                                                                                                                                                                                                                                                                                                                                                                                                                                                                                                                                                          | 23.83   | 48.05   | 0.5  | 9.47E-05 | 3.75E-04 |
| 5608 | 7 | F2-3 vs. S2-3 | 263049_at       | AT2G05260 |                                                                                                                                                                                                                                                                                                                                                                                                                                                                                                                                                                                                                                                                                                                                                                                                                       | 58.08   | 115.98  | 0.5  | 7.29E-05 | 3.08E-04 |
| 5609 | 7 | F2-3 vs. S2-3 | 263821_s_a      | AT2G09990 | Ribosomal protein S5 domain 2-like superfamily protein;(source:Araport11)                                                                                                                                                                                                                                                                                                                                                                                                                                                                                                                                                                                                                                                                                                                                             | 2163.65 | 4321.51 | 0.5  | 1.80E-05 | 1.12E-04 |
| 5610 | 7 | F2-3 vs. S2-3 | 266699_at       | AT2G19730 | Ribosomal L28e protein family;(source:Araport11)                                                                                                                                                                                                                                                                                                                                                                                                                                                                                                                                                                                                                                                                                                                                                                      | 181.61  | 364.59  | 0.5  | 1.89E-04 | 6.32E-04 |
| 5611 | 7 | F2-3 vs. S2-3 | 264020_at       | AT2G21160 | Translocon-associated protein (TRAP), alpha subunit;(source:Araport11)                                                                                                                                                                                                                                                                                                                                                                                                                                                                                                                                                                                                                                                                                                                                                | 251.9   | 500.77  | 0.5  | 4.19E-04 | 1.16E-03 |

|      |   |               |           |           |                                                                                                                                                                                                                                                                                                                                                                                                                                                                                                                                                                                                                                                                                                                                                                                                                                                                                                                                                                                                                                                                                                                                                                                                                                                |        |         |     |          |          |
|------|---|---------------|-----------|-----------|------------------------------------------------------------------------------------------------------------------------------------------------------------------------------------------------------------------------------------------------------------------------------------------------------------------------------------------------------------------------------------------------------------------------------------------------------------------------------------------------------------------------------------------------------------------------------------------------------------------------------------------------------------------------------------------------------------------------------------------------------------------------------------------------------------------------------------------------------------------------------------------------------------------------------------------------------------------------------------------------------------------------------------------------------------------------------------------------------------------------------------------------------------------------------------------------------------------------------------------------|--------|---------|-----|----------|----------|
|      |   |               |           |           | Homologous to receptor protein kinases. Involved in specification of organs originating from the shoot apical meristem. Contains a cytoplasmic protein kinase catalytic domain, a transmembrane region, and an extracellular leucine-rich repeat. ER has been identified as a quantitative trait locus for transpiration efficiency by influencing epidermal and mesophyll development, stomatal density and porosity of leaves. It has been implicated in resistance to the bacterium <i>Ralstonia solanacearum</i> and to the necrotrophic fungus <i>Plectosphaerella cucumerina</i> . Together with ERL1 and ERL2, ER governs the initial decision of protodermal cells to either divide proliferatively to produce pavement cells or divide asymmetrically to generate stomatal complexes. ER binds to the peptides STOMAGEN and EPF2 which compete for the same binding site. The ER-EFP2 complex activates MAPK signaling that inhibits stomatal development. ER-STOMAGEN does not activate MAPK signaling. Plants harboring loss of function alleles of <i>er</i> are more susceptible to heat stress than wild type. In Arabidopsis and other organisms, overexpression of ER confers thermotolerance via as yet undefined mechanisms. | 44.08  | 87.76   | 0.5 | 1.26E-04 | 4.64E-04 |
| 5612 | 7 | F2-3 vs. S2-3 | 267376_at | AT2G26330 |                                                                                                                                                                                                                                                                                                                                                                                                                                                                                                                                                                                                                                                                                                                                                                                                                                                                                                                                                                                                                                                                                                                                                                                                                                                | 19.41  | 38.56   | 0.5 | 2.00E-05 | 1.21E-04 |
| 5613 | 7 | F2-3 vs. S2-3 | 266216_at | AT2G28810 | Dof-type zinc finger DNA-binding family protein;(source:Araport11)                                                                                                                                                                                                                                                                                                                                                                                                                                                                                                                                                                                                                                                                                                                                                                                                                                                                                                                                                                                                                                                                                                                                                                             | 71.88  | 143.16  | 0.5 | 7.94E-04 | 1.89E-03 |
| 5614 | 7 | F2-3 vs. S2-3 | 267523_at | AT2G30600 | BTB/POZ domain-containing protein;(source:Araport11)                                                                                                                                                                                                                                                                                                                                                                                                                                                                                                                                                                                                                                                                                                                                                                                                                                                                                                                                                                                                                                                                                                                                                                                           |        |         |     |          |          |
|      |   |               |           |           | Encodes a small ubiquitin-like modifier (SUMO) protein that becomes covalently attached to various intracellular protein targets through an isopeptide bond. SUMOylation typically has a post-translational effect on the behavior of the target protein.                                                                                                                                                                                                                                                                                                                                                                                                                                                                                                                                                                                                                                                                                                                                                                                                                                                                                                                                                                                      | 11.32  | 22.47   | 0.5 | 7.93E-05 | 3.30E-04 |
| 5615 | 7 | F2-3 vs. S2-3 | 267555_at | AT2G32765 | Encodes a tonoplast intrinsic protein, which functions as water channel. It has also been shown to be able to facilitate the transport of urea and hydrogen peroxide. Highly expressed in vascular tissues of the root, stem, cauline leaves and flowers but not in the apical meristems. The mRNA is cell-to-cell mobile.                                                                                                                                                                                                                                                                                                                                                                                                                                                                                                                                                                                                                                                                                                                                                                                                                                                                                                                     |        |         |     |          |          |
| 5616 | 7 | F2-3 vs. S2-3 | 263867_at | AT2G36830 | SPIRAL1-LIKE3 belongs to a six-member gene family in Arabidopsis; all members share high sequence similarity in amino- and carboxy-terminal regions. Regulates cortical microtubule organization. Mutant plants exhibit altered patterns of root, leaf and petal growth as a result of defective anisotropic cell expansion.                                                                                                                                                                                                                                                                                                                                                                                                                                                                                                                                                                                                                                                                                                                                                                                                                                                                                                                   | 532.63 | 1068.2  | 0.5 | 8.10E-04 | 1.92E-03 |
| 5617 | 7 | F2-3 vs. S2-3 | 259131_at | AT3G02180 | Leucine-rich repeat protein kinase family protein;(source:Araport11)                                                                                                                                                                                                                                                                                                                                                                                                                                                                                                                                                                                                                                                                                                                                                                                                                                                                                                                                                                                                                                                                                                                                                                           | 717.79 | 1439.92 | 0.5 | 7.24E-05 | 3.06E-04 |
| 5618 | 7 | F2-3 vs. S2-3 | 258616_at | AT3G02880 | hypothetical protein;(source:Araport11)                                                                                                                                                                                                                                                                                                                                                                                                                                                                                                                                                                                                                                                                                                                                                                                                                                                                                                                                                                                                                                                                                                                                                                                                        | 92.32  | 183.73  | 0.5 | 1.36E-04 | 4.91E-04 |
| 5619 | 7 | F2-3 vs. S2-3 | 257879_at | AT3G17160 | transducin family protein / WD-40 repeat family protein;(source:Araport11)                                                                                                                                                                                                                                                                                                                                                                                                                                                                                                                                                                                                                                                                                                                                                                                                                                                                                                                                                                                                                                                                                                                                                                     | 145.63 | 293.61  | 0.5 | 2.08E-04 | 6.80E-04 |
| 5620 | 7 | F2-3 vs. S2-3 | 256657_at | AT3G18860 | Histone superfamily protein;(source:Araport11)                                                                                                                                                                                                                                                                                                                                                                                                                                                                                                                                                                                                                                                                                                                                                                                                                                                                                                                                                                                                                                                                                                                                                                                                 | 159.78 | 318.72  | 0.5 | 4.58E-04 | 1.24E-03 |
| 5621 | 7 | F2-3 vs. S2-3 | 252560_at | AT3G46030 |                                                                                                                                                                                                                                                                                                                                                                                                                                                                                                                                                                                                                                                                                                                                                                                                                                                                                                                                                                                                                                                                                                                                                                                                                                                | 12.45  | 24.92   | 0.5 | 2.76E-04 | 8.37E-04 |
|      |   |               |           |           | Encodes an NAD-dependent malic enzyme (NAD-ME) that does not act on oxaloacetate, indicating that it belongs to EC 1.1.1.39. It is a member of the beta family of NAD-MEs in plants. It appears to function as a homodimer or as a heterodimer with the alpha-type NAD-ME2 (At2g13560). NAD-ME2 transcript and protein levels are higher during the night than during the day.                                                                                                                                                                                                                                                                                                                                                                                                                                                                                                                                                                                                                                                                                                                                                                                                                                                                 | 98.32  | 198.5   | 0.5 | 3.07E-04 | 9.10E-04 |
| 5622 | 7 | F2-3 vs. S2-3 | 255683_at | AT4G00570 | Glycosyl hydrolase superfamily protein;(source:Araport11)                                                                                                                                                                                                                                                                                                                                                                                                                                                                                                                                                                                                                                                                                                                                                                                                                                                                                                                                                                                                                                                                                                                                                                                      | 104.24 | 207.41  | 0.5 | 6.31E-05 | 2.77E-04 |
| 5623 | 7 | F2-3 vs. S2-3 | 255603_at | AT4G01040 | GPN GTPase involved in selective nuclear import of RNA polymerase II.                                                                                                                                                                                                                                                                                                                                                                                                                                                                                                                                                                                                                                                                                                                                                                                                                                                                                                                                                                                                                                                                                                                                                                          | 349.89 | 705.63  | 0.5 | 5.54E-05 | 2.55E-04 |
| 5624 | 7 | F2-3 vs. S2-3 | 254788_at | AT4G12790 | Encodes a pectate lyase involved in response to nematodes.                                                                                                                                                                                                                                                                                                                                                                                                                                                                                                                                                                                                                                                                                                                                                                                                                                                                                                                                                                                                                                                                                                                                                                                     | 52.83  | 105.38  | 0.5 | 4.27E-04 | 1.17E-03 |
| 5625 | 7 | F2-3 vs. S2-3 | 254119_at | AT4G24780 |                                                                                                                                                                                                                                                                                                                                                                                                                                                                                                                                                                                                                                                                                                                                                                                                                                                                                                                                                                                                                                                                                                                                                                                                                                                |        |         |     |          |          |
|      |   |               |           |           | Encodes a novel Cys-rich protein with a B-box like domain that acts as a negative regulator of meristem cell accumulation in inflorescence and floral meristems as loss-of-function <i>ult1</i> mutations cause inflorescence meristem enlargement, the production of extra flowers and floral organs, and a decrease in floral meristem determinacy. Acts opposite to CLF which represses AG, but preventing deposition of CLF repressive methylation marks.ULT1 acts as an anti-repressor that counteracts EMF1 action through modulation of histone marks on target genes. Regulates developmental as well as biotic and abiotic stress response genes.                                                                                                                                                                                                                                                                                                                                                                                                                                                                                                                                                                                     | 21.22  | 42.67   | 0.5 | 1.15E-04 | 4.34E-04 |
| 5626 | 7 | F2-3 vs. S2-3 | 253811_at | AT4G28190 |                                                                                                                                                                                                                                                                                                                                                                                                                                                                                                                                                                                                                                                                                                                                                                                                                                                                                                                                                                                                                                                                                                                                                                                                                                                |        |         |     |          |          |

|      |   |               |           |           |                                                                                                                                                                                                                                                                                                                                                                                                                                                                                                                                                                                                                                                                                                    |        |        |      |          |          |
|------|---|---------------|-----------|-----------|----------------------------------------------------------------------------------------------------------------------------------------------------------------------------------------------------------------------------------------------------------------------------------------------------------------------------------------------------------------------------------------------------------------------------------------------------------------------------------------------------------------------------------------------------------------------------------------------------------------------------------------------------------------------------------------------------|--------|--------|------|----------|----------|
| 5627 | 7 | F2-3 vs. S2-3 | 246216_at | AT4G36380 | Encodes a cytochrome P-450 gene that is involved in leaf blade expansion by controlling polar cell expansion in the leaf length direction. Member of the CYP90C CYP450 family. ROT3 was shown to be involved in brassinosteroid biosynthesis, most likely in the conversion step of typhasterol (TY) to castasterone (CS). As 6-deoxo-CS was unable to restore the phenotype of rot3-1, it has been postulated that ROT3 might be specifically involved in the conversion of TY to CS in the C6-oxidation pathway of brassinolide. Recently, CYP90C1 was shown to catalyse the C-23 hydroxylation of several brassinosteroids (the enzyme has a broad specificity for 22-hydroxylated substrates). | 52.47  | 104.04 | 0.5  | 5.83E-04 | 1.49E-03 |
| 5628 | 7 | F2-3 vs. S2-3 | 250734_at | AT5G06270 | One of two plant specific paralogs of unknown function. Interacts with GL2. GIR1/GIR2 loss of function resembles gl2 lof mutations                                                                                                                                                                                                                                                                                                                                                                                                                                                                                                                                                                 | 23.34  | 46.75  | 0.5  | 8.08E-05 | 3.34E-04 |
| 5629 | 7 | F2-3 vs. S2-3 | 250670_at | AT5G06860 | Encodes a polygalacturonase inhibiting protein involved in defense response. PGIPs inhibit the function of cell wall pectin degrading enzymes such as those produced by fungal pathogens. PGIP1 is induced by fungal infection. Suppressed in the proton sensitive stop1-mutant, but the transcription level was recovered by transformation of STOP2. Knockout mutant showed severe damage in the root tip in low Ca and low pH medium.                                                                                                                                                                                                                                                           | 12.5   | 24.9   | 0.5  | 1.30E-04 | 4.74E-04 |
| 5630 | 7 | F2-3 vs. S2-3 | 245852_at | AT5G13510 | Ribosomal protein L10 family protein;(source:Araport11)                                                                                                                                                                                                                                                                                                                                                                                                                                                                                                                                                                                                                                            | 102.35 | 205.57 | 0.5  | 7.95E-04 | 1.89E-03 |
| 5631 | 7 | F2-3 vs. S2-3 | 249290_at | AT5G41060 | DHHC-type zinc finger family protein;(source:Araport11)                                                                                                                                                                                                                                                                                                                                                                                                                                                                                                                                                                                                                                            | 58.66  | 116.78 | 0.5  | 2.01E-04 | 6.63E-04 |
| 5632 | 7 | F2-3 vs. S2-3 | 248472_at | AT5G50860 | Protein kinase superfamily protein;(source:Araport11)                                                                                                                                                                                                                                                                                                                                                                                                                                                                                                                                                                                                                                              | 59.79  | 119.64 | 0.5  | 1.84E-04 | 6.21E-04 |
| 5633 | 7 | F2-3 vs. S2-3 | 248412_at | AT5G51590 | AT hook motif DNA-binding family protein;(source:Araport11)                                                                                                                                                                                                                                                                                                                                                                                                                                                                                                                                                                                                                                        | 137.29 | 272.11 | 0.5  | 4.01E-04 | 1.11E-03 |
| 5634 | 7 | F2-3 vs. S2-3 | 248223_at | AT5G53620 | RNA polymerase II degradation factor;(source:Araport11)                                                                                                                                                                                                                                                                                                                                                                                                                                                                                                                                                                                                                                            | 88.79  | 176.15 | 0.5  | 3.32E-04 | 9.65E-04 |
| 5635 | 7 | F2-3 vs. S2-3 | 248173_at | AT5G54580 | Encodes an RNA recognition motif (RRM) and is involved in C-> U RNA editing in mitochondria.                                                                                                                                                                                                                                                                                                                                                                                                                                                                                                                                                                                                       | 169.54 | 337.01 | 0.5  | 1.05E-04 | 4.05E-04 |
| 5636 | 7 | F2-3 vs. S2-3 | 247964_at | AT5G56600 | Encodes profilin3, a low-molecular weight, actin monomer-binding protein that regulates the organization of actin cytoskeleton. Originally known as profilin5, and later named profilin3. Expressed in vegetative organs. Mutants have slightly elongated petioles.                                                                                                                                                                                                                                                                                                                                                                                                                                | 150.5  | 303.72 | 0.5  | 1.78E-05 | 1.11E-04 |
| 5637 | 7 | F2-3 vs. S2-3 | 247115_at | AT5G65930 | encodes a novel member of the kinesin superfamily of motor proteins. recessive mutations have reduced number of trichome branches.                                                                                                                                                                                                                                                                                                                                                                                                                                                                                                                                                                 | 77.08  | 153.48 | 0.5  | 8.47E-04 | 1.99E-03 |
| 5638 | 7 | F2-3 vs. S2-3 | 263113_at | AT1G03150 | Acyl-CoA N-acyltransferases (NAT) superfamily protein;(source:Araport11)                                                                                                                                                                                                                                                                                                                                                                                                                                                                                                                                                                                                                           | 63.65  | 129.38 | 0.49 | 2.25E-04 | 7.18E-04 |
| 5639 | 7 | F2-3 vs. S2-3 | 262501_at | AT1G21690 | ATPase family associated with various cellular activities (AAA);(source:Araport11)                                                                                                                                                                                                                                                                                                                                                                                                                                                                                                                                                                                                                 | 89.32  | 183.48 | 0.49 | 1.51E-04 | 5.34E-04 |
| 5640 | 7 | F2-3 vs. S2-3 | 255977_at | AT1G34030 | Ribosomal protein S13/S18 family;(source:Araport11)                                                                                                                                                                                                                                                                                                                                                                                                                                                                                                                                                                                                                                                | 283.01 | 574.32 | 0.49 | 7.47E-04 | 1.80E-03 |
| 5641 | 7 | F2-3 vs. S2-3 | 262543_at | AT1G34245 | Encodes a secretory peptide EPF2 expressed in proliferating cells of the stomatal lineage, known as meristemoids, and in guard mother cells, the progenitors of stomata. Controls asymmetric cell divisions during stomatal development. EPF2 is related to EPF1, also involved in stomatal development. Its transcript levels change after inducing MUTE expression in a mute background. EPF2 binds to the ER receptor triggering MAPK activation that in turn inhibits stomatal development. EPF2 competes with STOMAGEN for binding to receptor protein kinases ER, and TMM.                                                                                                                   | 12.06  | 24.66  | 0.49 | 2.09E-05 | 1.25E-04 |
| 5642 | 7 | F2-3 vs. S2-3 | 261634_at | AT1G49970 | Encodes a ClpP-related sequence. Though similar to ClpP proteins, this does not contains the highly conserved catalytic triad of Ser-type proteases (Ser-His-Asp). The name reflects nomenclature described in Adam et. al (2001).                                                                                                                                                                                                                                                                                                                                                                                                                                                                 | 47.54  | 96.68  | 0.49 | 5.74E-05 | 2.61E-04 |
| 5643 | 7 | F2-3 vs. S2-3 | 262095_at | AT1G56090 | Tetratricopeptide repeat (TPR)-like superfamily protein;(source:Araport11)                                                                                                                                                                                                                                                                                                                                                                                                                                                                                                                                                                                                                         | 28.16  | 58.01  | 0.49 | 4.56E-04 | 1.23E-03 |
| 5644 | 7 | F2-3 vs. S2-3 | 256372_at | AT1G66750 | Encodes a CDK-activating kinase that interacts with SPT5, a regulator of transcription and histone methylation.                                                                                                                                                                                                                                                                                                                                                                                                                                                                                                                                                                                    | 37.31  | 75.59  | 0.49 | 3.63E-05 | 1.88E-04 |
| 5645 | 7 | F2-3 vs. S2-3 | 264337_at | AT1G70350 | hypothetical protein;(source:Araport11)                                                                                                                                                                                                                                                                                                                                                                                                                                                                                                                                                                                                                                                            | 15.56  | 31.82  | 0.49 | 6.99E-05 | 2.98E-04 |
| 5646 | 7 | F2-3 vs. S2-3 | 261352_at | AT1G79650 | Encodes a member of the RADIATION SENSITIVE23 (RAD23) family: AT1G16190(RAD23A), AT1G79650(RAD23B), AT3G02540(RAD23C), AT5G38470(RAD23D). RAD23 proteins play an essential role in the cell cycle, morphology, and fertility of plants through their delivery of UPS (ubiquitin/26S proteasome system) substrates to the 26S proteasome.                                                                                                                                                                                                                                                                                                                                                           | 22.83  | 46.36  | 0.49 | 1.92E-05 | 1.17E-04 |
| 5647 | 7 | F2-3 vs. S2-3 | 266684_at | AT2G19720 | ribosomal protein S15A B;(source:Araport11)                                                                                                                                                                                                                                                                                                                                                                                                                                                                                                                                                                                                                                                        | 41.67  | 84.9   | 0.49 | 2.68E-05 | 1.50E-04 |
| 5648 | 7 | F2-3 vs. S2-3 | 266317_at | AT2G27030 | encodes a calmodulin that has higher affinity to kinesin-like calmodulin binding motor protein than CAM4 or CAM6. The mRNA is cell-to-cell mobile.                                                                                                                                                                                                                                                                                                                                                                                                                                                                                                                                                 | 58.35  | 118.33 | 0.49 | 3.04E-05 | 1.64E-04 |
| 5649 | 7 | F2-3 vs. S2-3 | 266259_at | AT2G27830 | hypothetical protein;(source:Araport11)                                                                                                                                                                                                                                                                                                                                                                                                                                                                                                                                                                                                                                                            | 14.58  | 29.85  | 0.49 | 2.05E-04 | 6.74E-04 |

|      |   |               |           |           |                                                                                                                                                                                                                                                                                                                                                                                                                                                                                                                                                                                                                                          |        |        |      |          |          |
|------|---|---------------|-----------|-----------|------------------------------------------------------------------------------------------------------------------------------------------------------------------------------------------------------------------------------------------------------------------------------------------------------------------------------------------------------------------------------------------------------------------------------------------------------------------------------------------------------------------------------------------------------------------------------------------------------------------------------------------|--------|--------|------|----------|----------|
| 5650 | 7 | F2-3 vs. S2-3 | 264070_at | AT2G27960 | catalytic subunit of cyclin dependent kinase 1. physically interact with cyclin-dependent kinases (CDKs) and play an essential, but yet not entirely resolved, role in the regulation of the cell cycle                                                                                                                                                                                                                                                                                                                                                                                                                                  | 15.66  | 31.99  | 0.49 | 4.71E-05 | 2.27E-04 |
| 5651 | 7 | F2-3 vs. S2-3 | 263399_at | AT2G31490 | neuronal acetylcholine receptor subunit alpha-5;(source:Araport11)                                                                                                                                                                                                                                                                                                                                                                                                                                                                                                                                                                       | 92.85  | 191.16 | 0.49 | 2.22E-05 | 1.31E-04 |
| 5652 | 7 | F2-3 vs. S2-3 | 266886_at | AT2G44745 | WRKY family transcription factor;(source:Araport11)                                                                                                                                                                                                                                                                                                                                                                                                                                                                                                                                                                                      | 15.59  | 32.05  | 0.49 | 3.22E-04 | 9.45E-04 |
| 5653 | 7 | F2-3 vs. S2-3 | 265459_at | AT2G46540 | fiber;(source:Araport11)                                                                                                                                                                                                                                                                                                                                                                                                                                                                                                                                                                                                                 | 195.7  | 401.53 | 0.49 | 2.38E-05 | 1.38E-04 |
| 5654 | 7 | F2-3 vs. S2-3 | 259016_at | AT3G07480 | 2Fe-2S ferredoxin-like superfamily protein;(source:Araport11)                                                                                                                                                                                                                                                                                                                                                                                                                                                                                                                                                                            | 23.49  | 48.43  | 0.49 | 2.54E-05 | 1.44E-04 |
| 5655 | 7 | F2-3 vs. S2-3 | 258684_at | AT3G08680 | Leucine-rich repeat protein kinase family protein;(source:Araport11)<br>Encodes DEX1 (defective in exine formation). Required for exine pattern formation during pollen development.                                                                                                                                                                                                                                                                                                                                                                                                                                                     | 128.93 | 263.7  | 0.49 | 4.27E-05 | 2.12E-04 |
| 5656 | 7 | F2-3 vs. S2-3 | 259215_at | AT3G09090 | glyoxalase II cytoplasmic isozyme (Glx2-2) mRNA, complete                                                                                                                                                                                                                                                                                                                                                                                                                                                                                                                                                                                | 197.23 | 398.91 | 0.49 | 6.10E-04 | 1.55E-03 |
| 5657 | 7 | F2-3 vs. S2-3 | 258775_at | AT3G10850 | Zinc-binding ribosomal protein family protein;(source:Araport11)                                                                                                                                                                                                                                                                                                                                                                                                                                                                                                                                                                         | 77.53  | 159    | 0.49 | 3.00E-04 | 8.95E-04 |
| 5658 | 7 | F2-3 vs. S2-3 | 256434_at | AT3G10950 | Encodes a phosphatase with low in vitro tyrosine phosphatase activity that is capable of dephosphorylating in vitro the 3'phosphate group of PI3P, PI(3,4)P2, and PI(3,5)P2 and may be an effector of lipid signaling. The mRNA is cell-to-cell mobile.                                                                                                                                                                                                                                                                                                                                                                                  | 62.11  | 126.77 | 0.49 | 3.26E-04 | 9.51E-04 |
| 5659 | 7 | F2-3 vs. S2-3 | 258007_at | AT3G19420 | Encodes ribosomal protein L5 that binds to 5S ribosomal RNA and is involved in its export from the nucleus to the cytoplasm. Identified in a screen for enhancers of as1. as1/pgy double mutants show defects in leaf vascular patterning and adaxial cell fate. Double mutant analysis indicates pgy genes function in the same pathway as REV, KAN1 and KAN2.                                                                                                                                                                                                                                                                          | 154.83 | 313.46 | 0.49 | 2.55E-04 | 7.86E-04 |
| 5660 | 7 | F2-3 vs. S2-3 | 257906_at | AT3G25520 | ATPase E1-E2 type family protein / haloacid dehalogenase-like hydrolase family protein;(source:Araport11)                                                                                                                                                                                                                                                                                                                                                                                                                                                                                                                                | 352.97 | 725.18 | 0.49 | 5.22E-05 | 2.45E-04 |
| 5661 | 7 | F2-3 vs. S2-3 | 257224_at | AT3G27870 | Protein of unknown function. Locus is correlated with bacterial hypersensitive response, expression is reduced after injection with avrRpm1.                                                                                                                                                                                                                                                                                                                                                                                                                                                                                             | 32.44  | 66.56  | 0.49 | 3.28E-04 | 9.54E-04 |
| 5662 | 7 | F2-3 vs. S2-3 | 256607_at | AT3G32930 | Component of the translocon outer membrane (TOC) complex. Forms the outer envelope translocation channel (beta-barrel). Plays a role in preprotein conductance. Imported into chloroplast. Expressed in young dividing photosynthetic tissues. Knockout mutants are embryo lethal with arrested development at the two-cell stage. Knockout mutants have abnormal etioplasts.                                                                                                                                                                                                                                                            | 112.18 | 230.53 | 0.49 | 2.78E-04 | 8.40E-04 |
| 5663 | 7 | F2-3 vs. S2-3 | 252492_at | AT3G46740 | Encodes a transcription factor AtTCP14 that regulates seed germination. AtTCP14 shows elevated expression level just prior to germination. AtTCP14 is predominantly expressed in the vascular tissue of the embryo, and affects gene expression in radicles in a non-cell-autonomous manner. Modulates GA-dependent stamen filament elongation by direct activation of SAUR63 subfamily genes through conserved target sites in their promoters.                                                                                                                                                                                         | 113.5  | 229.5  | 0.49 | 2.72E-05 | 1.51E-04 |
| 5664 | 7 | F2-3 vs. S2-3 | 252425_at | AT3G47620 | Involved in regulating mitochondrial quality control. Regulates mitochondrial association time and thereby is involved in mitochondrial fusion. Mutants show unregulated autophagy and display transcriptomic markers of mitochondrial stress. Its activity can be modulated by Lys acetylation. One of two highly similar, non-catalytic subunits common to nuclear DNA-directed RNA polymerases II, IV and V; homologous to budding yeast RPB9. Appears to be redundant with At3g16980                                                                                                                                                 | 23.16  | 47     | 0.49 | 1.29E-04 | 4.71E-04 |
| 5665 | 7 | F2-3 vs. S2-3 | 252031_at | AT3G52140 | D6PK family kinase involved in pulse-induced phototropism but also for time-dependent second positive phototropism, and continuous light-induced hypocotyl phototropism.                                                                                                                                                                                                                                                                                                                                                                                                                                                                 | 43.73  | 88.59  | 0.49 | 7.21E-04 | 1.75E-03 |
| 5666 | 7 | F2-3 vs. S2-3 | 245367_at | AT4G16265 | Encodes a member of a family of Ser/Thr kinases whose activities peak during cell division. Transcripts are abundant in tissues rich in dividing cells like roots and flowers but are low or absent in fully expanded leaves and stems. In interphase cells, the protein is predominantly nuclear. During mitosis, the protein associates with plant-specific cytoskeletal structures (preprophase band, phragmoplast, nascent cell plate) that are necessary for cytokinesis as well as with the microtubule spindle. It specifically phosphorylates Ser10 of histone H3 and colocalizes with phosphorylated histone H3 during mitosis. | 79.67  | 162.08 | 0.49 | 1.41E-04 | 5.05E-04 |
| 5667 | 7 | F2-3 vs. S2-3 | 253976_at | AT4G26610 | P-loop containing nucleoside triphosphate hydrolases superfamily protein;(source:Araport11)                                                                                                                                                                                                                                                                                                                                                                                                                                                                                                                                              | 49.77  | 100.61 | 0.49 | 8.34E-05 | 3.41E-04 |
| 5668 | 7 | F2-3 vs. S2-3 | 253403_at | AT4G32830 | Regulator of Vps4 activity in the MVB pathway protein;(source:Araport11)                                                                                                                                                                                                                                                                                                                                                                                                                                                                                                                                                                 | 179.82 | 368.71 | 0.49 | 5.02E-04 | 1.33E-03 |
| 5669 | 7 | F2-3 vs. S2-3 | 253213_at | AT4G34910 | Encodes a nuclear ubiquitin-specific protease.                                                                                                                                                                                                                                                                                                                                                                                                                                                                                                                                                                                           | 35.34  | 72.36  | 0.49 | 3.66E-05 | 1.89E-04 |
| 5670 | 7 | F2-3 vs. S2-3 | 253156_at | AT4G35730 |                                                                                                                                                                                                                                                                                                                                                                                                                                                                                                                                                                                                                                          | 20.42  | 41.51  | 0.49 | 1.64E-04 | 5.66E-04 |
| 5671 | 7 | F2-3 vs. S2-3 | 252832_at | AT4G39910 |                                                                                                                                                                                                                                                                                                                                                                                                                                                                                                                                                                                                                                          | 52.68  | 108.31 | 0.49 | 3.91E-04 | 1.10E-03 |



|      |   |               |            |           |                                                                                                                                                                                                                                                                                                                                                                                                                                                                                                                            |         |         |      |          |          |
|------|---|---------------|------------|-----------|----------------------------------------------------------------------------------------------------------------------------------------------------------------------------------------------------------------------------------------------------------------------------------------------------------------------------------------------------------------------------------------------------------------------------------------------------------------------------------------------------------------------------|---------|---------|------|----------|----------|
| 5672 | 7 | F2-3 vs. S2-3 | 250642_at  | AT5G07180 | Encodes a receptor-like kinase that, together with ER and ERL1 governs the initial decision of protodermal cells to either divide proliferatively to produce pavement cells or divide asymmetrically to generate stomatal complexes. It is also important for maintaining stomatal stem cell activity and preventing terminal differentiation of the meristemoid into the guard mother cell. When heterozygous in an er/erl1 null background, plants are female sterile due to cell division defect in the integuments.    | 80.94   | 166.32  | 0.49 | 3.95E-04 | 1.10E-03 |
| 5673 | 7 | F2-3 vs. S2-3 | 250233_at  | AT5G13460 | Member of IQ67 (CaM binding) domain containing family.                                                                                                                                                                                                                                                                                                                                                                                                                                                                     | 34.97   | 70.97   | 0.49 | 7.76E-05 | 3.24E-04 |
| 5674 | 7 | F2-3 vs. S2-3 | 250237_at  | AT5G13560 | structural maintenance of chromosomes protein;(source:Araport11)                                                                                                                                                                                                                                                                                                                                                                                                                                                           | 97.4    | 199.12  | 0.49 | 6.06E-05 | 2.71E-04 |
| 5675 | 7 | F2-3 vs. S2-3 | 246957_at  | AT5G24670 | A protein coding gene with unknown function. The 5'UTR of this gene overlaps with a RNA coding gene TER2. TER2 (GenBank accession no. HQ401285) encodes a putative template sequence corresponding to 1.5 copies of the Arabidopsis telomere repeat (PNAS 2011, 108:73-78). Natural epiallele in Nok-1, transmission of the epiallele over generations depends only on the selfreinforcing loop between CHROMOMETHYLASE 3 and KRYPTONITE, involving DNA methylated in the CHG context and histone H3 lysine 9 methylation. | 151.46  | 308.45  | 0.49 | 5.63E-04 | 1.46E-03 |
| 5676 | 7 | F2-3 vs. S2-3 | 248914_at  | AT5G45750 | RAB GTPase homolog A1C;(source:Araport11)                                                                                                                                                                                                                                                                                                                                                                                                                                                                                  | 90.87   | 184.24  | 0.49 | 1.33E-04 | 4.83E-04 |
| 5677 | 7 | F2-3 vs. S2-3 | 248588_at  | AT5G49540 | Rab5-interacting family protein;(source:Araport11)<br>Polycomb group protein with zinc finger domain involved in negative regulation of reproductive development. Forms a complex with FIE, CLF, and MSI1. This complex modulates the expression of target genes including AG, PI and AP3.                                                                                                                                                                                                                                 | 213.59  | 439.82  | 0.49 | 5.53E-05 | 2.55E-04 |
| 5678 | 7 | F2-3 vs. S2-3 | 248438_at  | AT5G51230 | DEK domain-containing chromatin associated protein;(source:Araport11)                                                                                                                                                                                                                                                                                                                                                                                                                                                      | 180.33  | 364.68  | 0.49 | 5.97E-04 | 1.52E-03 |
| 5679 | 7 | F2-3 vs. S2-3 | 248070_at  | AT5G55660 | Encodes a microtubule-associated protein.                                                                                                                                                                                                                                                                                                                                                                                                                                                                                  | 118.31  | 242.06  | 0.49 | 2.08E-04 | 6.81E-04 |
| 5680 | 7 | F2-3 vs. S2-3 | 247910_at  | AT5G57410 | chaperone binding / ATPase activator;(source:Araport11)                                                                                                                                                                                                                                                                                                                                                                                                                                                                    | 70.6    | 143.07  | 0.49 | 3.65E-04 | 1.04E-03 |
| 5681 | 7 | F2-3 vs. S2-3 | 247847_at  | AT5G58110 | Ribosomal protein S4 (RPS4A) family protein;(source:Araport11)                                                                                                                                                                                                                                                                                                                                                                                                                                                             | 546.12  | 1114.16 | 0.49 | 1.58E-04 | 5.54E-04 |
| 5682 | 7 | F2-3 vs. S2-3 | 247815_at  | AT5G58420 | 30S chloroplast ribosomal protein S7                                                                                                                                                                                                                                                                                                                                                                                                                                                                                       | 383.39  | 777.77  | 0.49 | 8.12E-05 | 3.35E-04 |
| 5683 | 7 | F2-3 vs. S2-3 | 244992_s_a | ATCG01240 | Ribosomal protein L1p/L10e family;(source:Araport11)                                                                                                                                                                                                                                                                                                                                                                                                                                                                       | 3164.58 | 6456    | 0.49 | 2.21E-05 | 1.30E-04 |
| 5684 | 7 | F2-3 vs. S2-3 | 261694_at  | AT1G08360 | One of several nuclear-encoded ClpPs (caseinolytic protease). Contains a highly conserved catalytic triad of Ser-type proteases (Ser-His-Asp). The name reflects nomenclature described in Adam et. al (2001).                                                                                                                                                                                                                                                                                                             | 1445.73 | 3042.76 | 0.48 | 2.65E-04 | 8.11E-04 |
| 5685 | 7 | F2-3 vs. S2-3 | 262823_at  | AT1G11750 | SAUR-like auxin-responsive protein family;(source:Araport11)                                                                                                                                                                                                                                                                                                                                                                                                                                                               | 132.88  | 279.34  | 0.48 | 1.96E-04 | 6.49E-04 |
| 5686 | 7 | F2-3 vs. S2-3 | 261137_at  | AT1G19830 | Ribosomal protein L34;(source:Araport11)                                                                                                                                                                                                                                                                                                                                                                                                                                                                                   | 13.21   | 27.72   | 0.48 | 2.79E-05 | 1.54E-04 |
| 5687 | 7 | F2-3 vs. S2-3 | 260898_at  | AT1G29070 | Encodes a vacuolar protein. Mutation causes organizational defects in the endoplasmic reticulum and aberrant protein trafficking in the plant secretory pathway.The mRNA is cell-to-cell mobile.                                                                                                                                                                                                                                                                                                                           | 43.12   | 88.97   | 0.48 | 1.91E-04 | 6.37E-04 |
| 5688 | 7 | F2-3 vs. S2-3 | 263156_at  | AT1G54030 | Translation protein SH3-like family protein;(source:Araport11)                                                                                                                                                                                                                                                                                                                                                                                                                                                             | 96.19   | 198.75  | 0.48 | 1.31E-04 | 4.78E-04 |
| 5689 | 7 | F2-3 vs. S2-3 | 246379_s_a | AT1G57860 | TonB-dependent heme receptor A;(source:Araport11)                                                                                                                                                                                                                                                                                                                                                                                                                                                                          | 289.91  | 600.68  | 0.48 | 1.42E-04 | 5.06E-04 |
| 5690 | 7 | F2-3 vs. S2-3 | 256342_at  | AT1G72020 | auxin-like 1 protein;(source:Araport11)                                                                                                                                                                                                                                                                                                                                                                                                                                                                                    | 289.87  | 604.56  | 0.48 | 2.51E-05 | 1.43E-04 |
| 5691 | 7 | F2-3 vs. S2-3 | 261117_at  | AT1G75310 | Encodes a factor that influences pre-mRNA splicing and is required for embryonic development. Mutations result in an abnormal suspensor and embryo lethality. The mRNA is cell-to-cell mobile.                                                                                                                                                                                                                                                                                                                             | 13.8    | 28.79   | 0.48 | 5.34E-05 | 2.49E-04 |
| 5692 | 7 | F2-3 vs. S2-3 | 262068_at  | AT1G80070 | Ribosomal protein L4/L1 family;(source:Araport11)                                                                                                                                                                                                                                                                                                                                                                                                                                                                          | 274.57  | 571.56  | 0.48 | 2.13E-05 | 1.27E-04 |
| 5693 | 7 | F2-3 vs. S2-3 | 265594_at  | AT2G20060 | encodes U2B", which is a component of the U2 snRNP complex. Its precise role in pre-mRNA splicing is still unknown. It has been suggested that U2B0 may not be required for the splicing reaction itself but may have a role in U2 snRNP biogenesis. Deletion analysis of the U2B0 gene fusion has identified the N-terminal RNP-80 motif as sufficient for localization to the coiled body and the nucleus.                                                                                                               | 166.76  | 347.97  | 0.48 | 6.57E-05 | 2.86E-04 |
| 5694 | 7 | F2-3 vs. S2-3 | 255871_at  | AT2G30260 | Dormancy/auxin associated family protein;(source:Araport11)                                                                                                                                                                                                                                                                                                                                                                                                                                                                | 35.06   | 72.57   | 0.48 | 1.88E-04 | 6.32E-04 |
| 5695 | 7 | F2-3 vs. S2-3 | 267461_at  | AT2G33830 | SAUR-like auxin-responsive protein family;(source:Araport11)                                                                                                                                                                                                                                                                                                                                                                                                                                                               | 28.71   | 60.36   | 0.48 | 2.16E-04 | 6.96E-04 |
| 5696 | 7 | F2-3 vs. S2-3 | 257690_at  | AT3G12830 | Ribosomal protein S10p/S20e family protein;(source:Araport11)                                                                                                                                                                                                                                                                                                                                                                                                                                                              | 23.11   | 48.55   | 0.48 | 2.10E-05 | 1.26E-04 |
| 5697 | 7 | F2-3 vs. S2-3 | 257190_at  | AT3G13120 | RING/U-box superfamily protein;(source:Araport11)                                                                                                                                                                                                                                                                                                                                                                                                                                                                          | 44.93   | 94.22   | 0.48 | 7.56E-05 | 3.17E-04 |
| 5698 | 7 | F2-3 vs. S2-3 | 257967_at  | AT3G19910 | Auxin F box protein, the dominant auxin receptor in roots.                                                                                                                                                                                                                                                                                                                                                                                                                                                                 | 305.13  | 635.67  | 0.48 | 2.11E-04 | 6.85E-04 |
| 5699 | 7 | F2-3 vs. S2-3 | 258311_at  | AT3G26810 | Encodes a protein that functions in microtubule assembly. PLP3a can bind to several different tubulin family members in Y2H assays. Plants with reduced levels of both PLP3a and PLP3b (At5g66410) show defects in cytokinesis, cortical microtubule array formation, oriented cell growth, and maintenance of proper ploidy.                                                                                                                                                                                              | 27.22   | 57.28   | 0.48 | 1.02E-04 | 3.99E-04 |
| 5700 | 7 | F2-3 vs. S2-3 | 252127_at  | AT3G50960 | Pectin lyase-like superfamily protein;(source:Araport11)                                                                                                                                                                                                                                                                                                                                                                                                                                                                   | 31.47   | 66.1    | 0.48 | 4.43E-05 | 2.17E-04 |
| 5701 | 7 | F2-3 vs. S2-3 | 251982_at  | AT3G53190 | Putative endonuclease or glycosyl hydrolase;(source:Araport11)                                                                                                                                                                                                                                                                                                                                                                                                                                                             | 88.96   | 186.96  | 0.48 | 7.21E-05 | 3.05E-04 |
| 5702 | 7 | F2-3 vs. S2-3 | 251271_at  | AT3G62050 |                                                                                                                                                                                                                                                                                                                                                                                                                                                                                                                            | 11.47   | 23.94   | 0.48 | 1.33E-05 | 9.14E-05 |

|      |   |               |            |           |                                                                                                                                                                                                                                                                                                                                                                                                                                                                                |         |         |      |          |          |
|------|---|---------------|------------|-----------|--------------------------------------------------------------------------------------------------------------------------------------------------------------------------------------------------------------------------------------------------------------------------------------------------------------------------------------------------------------------------------------------------------------------------------------------------------------------------------|---------|---------|------|----------|----------|
| 5703 | 7 | F2-3 vs. S2-3 | 255378_at  | AT4G03550 | Encodes a callose synthase that is required for wound and papillary callose formation in response to fungal pathogens Erysiphe and Blumeria. Mutants are resistant to P. parasitica and exhibit an exaggerated PR1 response. Contributes to PAMP-induced basal defense. The mRNA is cell-to-cell mobile.                                                                                                                                                                       | 117.06  | 241.73  | 0.48 | 3.72E-05 | 1.91E-04 |
| 5704 | 7 | F2-3 vs. S2-3 | 254999_at  | AT4G09830 | nuclear receptor family 2 group C protein;(source:Araport11)                                                                                                                                                                                                                                                                                                                                                                                                                   | 78.55   | 164.16  | 0.48 | 8.38E-05 | 3.42E-04 |
| 5705 | 7 | F2-3 vs. S2-3 | 253284_at  | AT4G34150 | Calcium-dependent lipid-binding (CaLB domain) family protein;(source:Araport11)                                                                                                                                                                                                                                                                                                                                                                                                | 54.3    | 113.66  | 0.48 | 3.68E-04 | 1.05E-03 |
| 5706 | 7 | F2-3 vs. S2-3 | 250895_at  | AT5G03850 | Nucleic acid-binding, OB-fold-like protein;(source:Araport11)                                                                                                                                                                                                                                                                                                                                                                                                                  | 319.76  | 663.62  | 0.48 | 2.39E-04 | 7.49E-04 |
| 5707 | 7 | F2-3 vs. S2-3 | 250590_at  | AT5G07710 | Polynucleotidyl transferase, ribonuclease H-like superfamily protein;(source:Araport11)                                                                                                                                                                                                                                                                                                                                                                                        | 27.98   | 58.26   | 0.48 | 4.15E-05 | 2.08E-04 |
| 5708 | 7 | F2-3 vs. S2-3 | 250144_at  | AT5G14680 | Adenine nucleotide alpha hydrolases-like superfamily protein;(source:Araport11)<br>fass mutants have aberrant cell shapes due to defects in arrangement of cortical microtubules.<br>Encodes a protein highly conserved in higher plants and similar in its C-terminal part to B' regulatory subunits of type 2A protein phosphatases. Interacts with an Arabidopsis type A subunit of PP2A in the yeast two-hybrid system.                                                    | 51.85   | 107.59  | 0.48 | 1.38E-04 | 4.96E-04 |
| 5709 | 7 | F2-3 vs. S2-3 | 249998_at  | AT5G18580 | Encodes a ring-box 1 like protein and component of the SCF ubiquitination complex mediating auxin responses. Forms a E3 ubiquitin ligase complex with CUL3A and At1g21780.1 a BTB domain protein.                                                                                                                                                                                                                                                                              | 53.49   | 112.46  | 0.48 | 1.11E-04 | 4.24E-04 |
| 5710 | 7 | F2-3 vs. S2-3 | 246089_at  | AT5G20570 | hypothetical protein;(source:Araport11)                                                                                                                                                                                                                                                                                                                                                                                                                                        | 239.49  | 499.55  | 0.48 | 5.27E-05 | 2.47E-04 |
| 5711 | 7 | F2-3 vs. S2-3 | 249750_at  | AT5G24570 | subtilase 1.3;(source:Araport11)                                                                                                                                                                                                                                                                                                                                                                                                                                               | 14.56   | 30.54   | 0.48 | 3.83E-05 | 1.95E-04 |
| 5712 | 7 | F2-3 vs. S2-3 | 248427_at  | AT5G51750 |                                                                                                                                                                                                                                                                                                                                                                                                                                                                                | 391.64  | 823.91  | 0.48 | 2.05E-05 | 1.24E-04 |
| 5713 | 7 | F2-3 vs. S2-3 | 248107_at  | AT5G55190 | A member of RAN GTPase gene family. Encodes a small soluble GTP-binding protein. Likely to be involved in nuclear translocation of proteins. May also be involved in cell cycle progression.                                                                                                                                                                                                                                                                                   | 435.89  | 912.31  | 0.48 | 1.05E-04 | 4.05E-04 |
| 5714 | 7 | F2-3 vs. S2-3 | 248095_at  | AT5G55230 | Binds and bundles microtubules. Plays a role in stabilizing anti-parallel microtubules in the central spindle at anaphase to early cytokinesis but is not essential at the midline of the phragmoplast at later stages. The timing with which the MAP65-1 was targeted to the spindle appears to be regulated by a phosphorylation sensitive switch. Enhances microtubule polymerization, promotes nucleation and stabilizes microtubules against cold treatment and dilution. | 83.71   | 176.23  | 0.48 | 7.43E-04 | 1.79E-03 |
| 5715 | 7 | F2-3 vs. S2-3 | 261025_at  | AT1G01225 | NC domain-containing protein-like protein;(source:Araport11)                                                                                                                                                                                                                                                                                                                                                                                                                   | 23.12   | 49.28   | 0.47 | 4.64E-05 | 2.25E-04 |
| 5716 | 7 | F2-3 vs. S2-3 | 260895_at  | AT1G29250 | Alba DNA/RNA-binding protein;(source:Araport11)<br>Encodes a NAC domain transcription factor that regulates the mitochondrial retrograde response and coordinates organellar functions and stress responses.                                                                                                                                                                                                                                                                   | 13.71   | 29.25   | 0.47 | 4.21E-04 | 1.16E-03 |
| 5717 | 7 | F2-3 vs. S2-3 | 262514_at  | AT1G34190 | tRNA-splicing ligase (DUF239);(source:Araport11)                                                                                                                                                                                                                                                                                                                                                                                                                               | 120.64  | 258.06  | 0.47 | 1.79E-04 | 6.05E-04 |
| 5718 | 7 | F2-3 vs. S2-3 | 257510_at  | AT1G55360 | RNA-binding (RRM/RBD/RNP motifs) family protein;(source:Araport11)                                                                                                                                                                                                                                                                                                                                                                                                             | 104.83  | 222.36  | 0.47 | 4.64E-05 | 2.25E-04 |
| 5719 | 7 | F2-3 vs. S2-3 | 260806_at  | AT1G78260 | pathogenesis-related family protein;(source:Araport11)                                                                                                                                                                                                                                                                                                                                                                                                                         | 13.18   | 27.99   | 0.47 | 2.40E-04 | 7.50E-04 |
| 5720 | 7 | F2-3 vs. S2-3 | 264301_at  | AT1G78780 | SKP1-like 20;(source:Araport11)                                                                                                                                                                                                                                                                                                                                                                                                                                                | 225.28  | 483.36  | 0.47 | 3.51E-05 | 1.83E-04 |
| 5721 | 7 | F2-3 vs. S2-3 | 266922_s_a | AT2G45950 | serine/arginine repetitive matrix protein;(source:Araport11)                                                                                                                                                                                                                                                                                                                                                                                                                   | 76.62   | 162.49  | 0.47 | 1.68E-05 | 1.07E-04 |
| 5722 | 7 | F2-3 vs. S2-3 | 266325_at  | AT2G46630 |                                                                                                                                                                                                                                                                                                                                                                                                                                                                                | 14.61   | 31.02   | 0.47 | 6.70E-04 | 1.66E-03 |
| 5723 | 7 | F2-3 vs. S2-3 | 258553_at  | AT3G06960 | TGD4 is an integral dimeric beta-barrel lipid transfer protein that binds PtdOH with its N-terminus and contains dimerization domains at its C-terminus. Mutations in this gene suppress the low temperature-induced phenotype of Arabidopsis tocopherol-deficient mutant vte2.                                                                                                                                                                                                | 33.43   | 71.82   | 0.47 | 1.00E-05 | 7.51E-05 |
| 5724 | 7 | F2-3 vs. S2-3 | 265963_s_a | AT3G11940 | One of two genes encoding the ribosomal protein S5. Mutants have semi-dominant developmental phenotypes. Most cell-division processes are delayed or disturbed in the heterozygous mutant, and development is completely arrested at an early embryonic stage in the homozygous mutant.                                                                                                                                                                                        | 3912.93 | 8342.67 | 0.47 | 4.46E-05 | 2.18E-04 |
| 5725 | 7 | F2-3 vs. S2-3 | 256926_at  | AT3G22540 | hypothetical protein (DUF1677);(source:Araport11)                                                                                                                                                                                                                                                                                                                                                                                                                              | 70.25   | 150.76  | 0.47 | 1.96E-05 | 1.19E-04 |
| 5726 | 7 | F2-3 vs. S2-3 | 258318_at  | AT3G22680 | Encodes RNA-DIRECTED DNA METHYLATION 1 (RDM1), forming a complex with DMS3 (AT3G49250) and DRD1 (AT2G16390). This complex is termed DDR. The DDR complex is required for polymerase V transcripts and RNA-directed DNA methylation.                                                                                                                                                                                                                                            | 13.04   | 27.57   | 0.47 | 6.79E-04 | 1.68E-03 |
| 5727 | 7 | F2-3 vs. S2-3 | 256890_at  | AT3G23830 | encodes a glycine-rich RNA binding protein. Gene expression is induced by cold and reduced by ionic (salt) and non-ionic (mannitol) osmotic stress. Lines overexpressing the gene are slightly more tolerant to osmotic stress during germination.                                                                                                                                                                                                                             | 97.94   | 206.95  | 0.47 | 2.28E-05 | 1.33E-04 |
| 5728 | 7 | F2-3 vs. S2-3 | 256864_at  | AT3G23890 | Encodes a topoisomerase II that is highly expressed in young seedlings. The protein is localized in the nucleus and gene expression levels are increased in proliferative tissues.                                                                                                                                                                                                                                                                                             | 38.49   | 81.11   | 0.47 | 3.15E-05 | 1.68E-04 |

|                                                                                                                                                                                                                                                                                                                                                                                                                                                             |   |               |            |           |                                                                                                                                                                                                                                                                |        |         |      |          |          |
|-------------------------------------------------------------------------------------------------------------------------------------------------------------------------------------------------------------------------------------------------------------------------------------------------------------------------------------------------------------------------------------------------------------------------------------------------------------|---|---------------|------------|-----------|----------------------------------------------------------------------------------------------------------------------------------------------------------------------------------------------------------------------------------------------------------------|--------|---------|------|----------|----------|
| 5729                                                                                                                                                                                                                                                                                                                                                                                                                                                        | 7 | F2-3 vs. S2-3 | 252348_at  | AT3G48140 | B12D protein;(source:Araport11)                                                                                                                                                                                                                                | 861.85 | 1823.29 | 0.47 | 2.80E-04 | 8.45E-04 |
| 5730                                                                                                                                                                                                                                                                                                                                                                                                                                                        | 7 | F2-3 vs. S2-3 | 252205_at  | AT3G50350 | membrane insertase, putative (DUF1685);(source:Araport11)                                                                                                                                                                                                      | 55.56  | 118.38  | 0.47 | 6.51E-04 | 1.63E-03 |
| 5731                                                                                                                                                                                                                                                                                                                                                                                                                                                        | 7 | F2-3 vs. S2-3 | 251938_at  | AT3G53430 | Ribosomal protein L11 family protein;(source:Araport11)                                                                                                                                                                                                        | 216.12 | 455.81  | 0.47 | 7.27E-04 | 1.76E-03 |
| 5732                                                                                                                                                                                                                                                                                                                                                                                                                                                        | 7 | F2-3 vs. S2-3 | 251800_at  | AT3G55510 | Encodes a regulator of floral determinacy in that interacts with both nucleolar and nucleoplasmic proteins.                                                                                                                                                    | 30.27  | 64.65   | 0.47 | 1.03E-05 | 7.67E-05 |
| 5733                                                                                                                                                                                                                                                                                                                                                                                                                                                        | 7 | F2-3 vs. S2-3 | 255285_at  | AT4G04630 | senescence regulator (Protein of unknown function, DUF584);(source:Araport11)                                                                                                                                                                                  | 11.12  | 23.64   | 0.47 | 1.09E-05 | 8.03E-05 |
| This locus is annotated as a protein-coding gene in TAIR10. Based on communication with Jean-Luc GALLOIS (April 2013), this gene is split into two UBX domain-containing pseudogenes: one retains the original name: AT4G14250 (Chr4:8213237..8211984), one given a new locus identifier AT4G14245 (Chr4:8210231..8208985). Note that the Map Detail Image on the locus detail page and in GBrowse will not be updated until after the next genome release. |   |               |            |           |                                                                                                                                                                                                                                                                |        |         |      |          |          |
| 5734                                                                                                                                                                                                                                                                                                                                                                                                                                                        | 7 | F2-3 vs. S2-3 | 262100_s_a | AT4G14250 | Regulates fate transition and cell Divisions in the stomatal lineage.                                                                                                                                                                                          | 18.26  | 39.09   | 0.47 | 2.77E-05 | 1.53E-04 |
| 5735                                                                                                                                                                                                                                                                                                                                                                                                                                                        | 7 | F2-3 vs. S2-3 | 245576_at  | AT4G14770 | Encodes a homeodomain-leucine zipper protein that is rapidly and strongly induced by changes in the ratio of red to far-red light. It is also involved in cell expansion and cell proliferation and in the response to auxin. The mRNA is cell-to-cell mobile. | 35.4   | 75.9    | 0.47 | 2.42E-05 | 1.39E-04 |
| 5736                                                                                                                                                                                                                                                                                                                                                                                                                                                        | 7 | F2-3 vs. S2-3 | 245276_at  | AT4G16780 |                                                                                                                                                                                                                                                                | 49.42  | 105.91  | 0.47 | 1.33E-05 | 9.14E-05 |
| 5737                                                                                                                                                                                                                                                                                                                                                                                                                                                        | 7 | F2-3 vs. S2-3 | 253644_at  | AT4G29870 | Oligosaccharyltransferase complex/magnesium transporter family protein;(source:Araport11)                                                                                                                                                                      | 51.2   | 108.18  | 0.47 | 1.08E-05 | 7.97E-05 |
| 5738                                                                                                                                                                                                                                                                                                                                                                                                                                                        | 7 | F2-3 vs. S2-3 | 246205_at  | AT4G36970 | Remorin family protein;(source:Araport11)                                                                                                                                                                                                                      | 109.39 | 234.13  | 0.47 | 2.42E-05 | 1.39E-04 |
| 5739                                                                                                                                                                                                                                                                                                                                                                                                                                                        | 7 | F2-3 vs. S2-3 | 245930_at  | AT5G09240 | ssDNA-binding transcriptional regulator;(source:Araport11)                                                                                                                                                                                                     | 30.05  | 64.61   | 0.47 | 6.67E-04 | 1.65E-03 |
| 5740                                                                                                                                                                                                                                                                                                                                                                                                                                                        | 7 | F2-3 vs. S2-3 | 246423_at  | AT5G16950 | krueppel-like factor;(source:Araport11)                                                                                                                                                                                                                        | 21.3   | 44.84   | 0.47 | 1.34E-04 | 4.84E-04 |
| 5741                                                                                                                                                                                                                                                                                                                                                                                                                                                        | 7 | F2-3 vs. S2-3 | 246415_at  | AT5G17160 | aspartic/glutamic acid-rich protein;(source:Araport11)                                                                                                                                                                                                         | 29.08  | 62.06   | 0.47 | 2.81E-04 | 8.46E-04 |
| 5742                                                                                                                                                                                                                                                                                                                                                                                                                                                        | 7 | F2-3 vs. S2-3 | 246650_at  | AT5G35160 | Endomembrane protein 70 protein family;(source:Araport11)                                                                                                                                                                                                      | 27.19  | 57.96   | 0.47 | 1.83E-05 | 1.13E-04 |
| 5743                                                                                                                                                                                                                                                                                                                                                                                                                                                        | 7 | F2-3 vs. S2-3 | 249231_at  | AT5G42030 | ABL interactor-like protein 4;(source:Araport11)                                                                                                                                                                                                               | 17.69  | 37.55   | 0.47 | 1.32E-04 | 4.80E-04 |
| 5744                                                                                                                                                                                                                                                                                                                                                                                                                                                        | 7 | F2-3 vs. S2-3 | 249192_at  | AT5G42470 | BRCA1-A complex subunit BRE-like protein;(source:Araport11)                                                                                                                                                                                                    | 28.16  | 59.88   | 0.47 | 1.17E-04 | 4.38E-04 |
| 5745                                                                                                                                                                                                                                                                                                                                                                                                                                                        | 7 | F2-3 vs. S2-3 | 248811_at  | AT5G47310 | PPPDE putative thiol peptidase family protein;(source:Araport11)                                                                                                                                                                                               | 21.67  | 46.02   | 0.47 | 2.80E-05 | 1.54E-04 |
| 5746                                                                                                                                                                                                                                                                                                                                                                                                                                                        | 7 | F2-3 vs. S2-3 | 248473_at  | AT5G50810 | Encodes a small zinc finger-like protein that is a component of the mitochondrial protein import apparatus.                                                                                                                                                    | 86.03  | 182.97  | 0.47 | 9.91E-05 | 3.90E-04 |
| 5747                                                                                                                                                                                                                                                                                                                                                                                                                                                        | 7 | F2-3 vs. S2-3 | 248378_at  | AT5G51840 | junctophilin-like protein;(source:Araport11)                                                                                                                                                                                                                   | 25.9   | 54.86   | 0.47 | 7.83E-04 | 1.87E-03 |
| 5748                                                                                                                                                                                                                                                                                                                                                                                                                                                        | 7 | F2-3 vs. S2-3 | 248139_at  | AT5G54970 | hypothetical protein;(source:Araport11)                                                                                                                                                                                                                        | 13.47  | 28.64   | 0.47 | 1.89E-05 | 1.16E-04 |
| 5749                                                                                                                                                                                                                                                                                                                                                                                                                                                        | 7 | F2-3 vs. S2-3 | 248098_at  | AT5G55290 | ATPase, V0 complex, subunit E;(source:Araport11)                                                                                                                                                                                                               | 43.9   | 93.02   | 0.47 | 3.31E-04 | 9.63E-04 |
| 5750                                                                                                                                                                                                                                                                                                                                                                                                                                                        | 7 | F2-3 vs. S2-3 | 247407_at  | AT5G62900 | basic-leucine zipper transcription factor K;(source:Araport11)                                                                                                                                                                                                 | 18.09  | 38.12   | 0.47 | 3.05E-04 | 9.06E-04 |
| 5751                                                                                                                                                                                                                                                                                                                                                                                                                                                        | 7 | F2-3 vs. S2-3 | 260725_at  | AT1G48170 | proteasome assembly chaperone;(source:Araport11)                                                                                                                                                                                                               | 58.4   | 127.98  | 0.46 | 6.82E-04 | 1.68E-03 |
| 5752                                                                                                                                                                                                                                                                                                                                                                                                                                                        | 7 | F2-3 vs. S2-3 | 265070_at  | AT1G55510 | branched-chain alpha-keto acid decarboxylase E1 beta                                                                                                                                                                                                           | 240.11 | 520.99  | 0.46 | 6.41E-05 | 2.81E-04 |
| 5753                                                                                                                                                                                                                                                                                                                                                                                                                                                        | 7 | F2-3 vs. S2-3 | 262341_at  | AT1G64230 | ubiquitin-conjugating enzyme 28;(source:Araport11)                                                                                                                                                                                                             | 634.18 | 1368.53 | 0.46 | 2.51E-05 | 1.43E-04 |
| 5754                                                                                                                                                                                                                                                                                                                                                                                                                                                        | 7 | F2-3 vs. S2-3 | 264878_at  | AT2G17410 | AT Rich domain protein.                                                                                                                                                                                                                                        | 104.88 | 229.28  | 0.46 | 1.89E-04 | 6.32E-04 |
| 5755                                                                                                                                                                                                                                                                                                                                                                                                                                                        | 7 | F2-3 vs. S2-3 | 265443_at  | AT2G20750 | member of BETA-EXPANSINS. Naming convention from the Expansin Working Group (Kende et al, 2004. Plant Mol Bio)                                                                                                                                                 | 22.64  | 48.78   | 0.46 | 2.64E-05 | 1.49E-04 |
| AGO4 is a member of a class of PAZ/PIWI domain containing proteins involved in siRNA mediated gene silencing.Loss of function mutations have reduced site specific CpNpG and CpHpH methylation and increased susceptibility to bacterial pathogens including Tobacco rattle virus.                                                                                                                                                                          |   |               |            |           |                                                                                                                                                                                                                                                                |        |         |      |          |          |
| 5756                                                                                                                                                                                                                                                                                                                                                                                                                                                        | 7 | F2-3 vs. S2-3 | 266314_at  | AT2G27040 | TCP family protein involved in heterochronic regulation of leaf differentiation.                                                                                                                                                                               | 164.82 | 357.79  | 0.46 | 8.30E-06 | 6.60E-05 |
| 5757                                                                                                                                                                                                                                                                                                                                                                                                                                                        | 7 | F2-3 vs. S2-3 | 266481_at  | AT2G31070 |                                                                                                                                                                                                                                                                | 30.56  | 66.37   | 0.46 | 1.32E-05 | 9.10E-05 |
| encodes a copper binding protein that forms tetramers in vitro. Gene is expressed in all tissues examined and protein is localized to the chloroplast. The mRNA is cell-to-cell mobile.                                                                                                                                                                                                                                                                     |   |               |            |           |                                                                                                                                                                                                                                                                |        |         |      |          |          |
| 5758                                                                                                                                                                                                                                                                                                                                                                                                                                                        | 7 | F2-3 vs. S2-3 | 267405_at  | AT2G33740 | Yos1-like protein;(source:Araport11)                                                                                                                                                                                                                           | 91.23  | 196.52  | 0.46 | 4.34E-05 | 2.14E-04 |
| 5759                                                                                                                                                                                                                                                                                                                                                                                                                                                        | 7 | F2-3 vs. S2-3 | 266094_at  | AT2G37975 | Involved in the regulation of salt stress. Expression of AtSAP18 is induced by NaCl, cold, drought, ABA, and ethylene treatment. AtSAP18 and HDA19 associate with ERF3 and ERF4 both in vitro and in vivo.                                                     | 70.8   | 155.24  | 0.46 | 2.11E-04 | 6.85E-04 |
| 5760                                                                                                                                                                                                                                                                                                                                                                                                                                                        | 7 | F2-3 vs. S2-3 | 267510_at  | AT2G45640 | zinc knuckle (CCHC-type) family protein;(source:Araport11)                                                                                                                                                                                                     | 30.63  | 66.38   | 0.46 | 8.60E-06 | 6.77E-05 |
| 5761                                                                                                                                                                                                                                                                                                                                                                                                                                                        | 7 | F2-3 vs. S2-3 | 258630_at  | AT3G02820 | Encodes AtNek2, a member of the NIMA-related serine/threonine kinases (Neks) that have been linked to cell-cycle regulation in fungi and mammals. Plant Neks might be involved in plant development processes.                                                 | 13.93  | 30.04   | 0.46 | 4.28E-05 | 2.12E-04 |
| 5762                                                                                                                                                                                                                                                                                                                                                                                                                                                        | 7 | F2-3 vs. S2-3 | 259083_at  | AT3G04810 |                                                                                                                                                                                                                                                                | 12.92  | 27.89   | 0.46 | 2.04E-04 | 6.71E-04 |
| Ubiquitin-specific protease, which together with UBP12 deubiquitinates DA1, DAR1 and DAR2, hence reducing their peptidase activity. Works upstream of DA1, DAR1 and DAR2 to restrict their protease activity and hence fine-tune plant growth and development.                                                                                                                                                                                              |   |               |            |           |                                                                                                                                                                                                                                                                |        |         |      |          |          |
| 5763                                                                                                                                                                                                                                                                                                                                                                                                                                                        | 7 | F2-3 vs. S2-3 | 258780_at  | AT3G11910 |                                                                                                                                                                                                                                                                | 44.82  | 97.17   | 0.46 | 6.03E-04 | 1.53E-03 |

|      |   |               |            |           |                                                                                                                                                                                                                                                                                                                                                                                                                                                                                                                 |        |         |      |          |          |
|------|---|---------------|------------|-----------|-----------------------------------------------------------------------------------------------------------------------------------------------------------------------------------------------------------------------------------------------------------------------------------------------------------------------------------------------------------------------------------------------------------------------------------------------------------------------------------------------------------------|--------|---------|------|----------|----------|
| 5764 | 7 | F2-3 vs. S2-3 | 252056_at  | AT3G52590 | Ubiquitin extension protein The mRNA is cell-to-cell mobile.                                                                                                                                                                                                                                                                                                                                                                                                                                                    | 55.65  | 120.9   | 0.46 | 7.98E-04 | 1.90E-03 |
| 5765 | 7 | F2-3 vs. S2-3 | 251935_at  | AT3G54090 | Encodes a fructokinase-like protein (AT3G54090/FLN1, AT1G69200/FLN2), a member of the pfkB-carbohydrate kinase family. FLN1 and FLN2 are potential plastidial thioredoxin z (TRX z) targets.                                                                                                                                                                                                                                                                                                                    | 132.42 | 285.16  | 0.46 | 3.85E-04 | 1.08E-03 |
| 5766 | 7 | F2-3 vs. S2-3 | 255517_at  | AT4G02290 | Mutants display mutant chloroplast development, general plant growth and development defects and defects in PEP-dependent transcription.                                                                                                                                                                                                                                                                                                                                                                        | 577.69 | 1268.08 | 0.46 | 9.18E-05 | 3.67E-04 |
| 5767 | 7 | F2-3 vs. S2-3 | 255130_at  | AT4G08240 | glycosyl hydrolase 9B13;(source:Araport11)<br>histone-lysine N-methyltransferase;(source:Araport11)                                                                                                                                                                                                                                                                                                                                                                                                             | 80.35  | 175     | 0.46 | 7.51E-05 | 3.15E-04 |
| 5768 | 7 | F2-3 vs. S2-3 | 245523_at  | AT4G15910 | encodes a gene whose transcript level in root and leaves increases to progressive drought stress. The transcript level is also affected by changes of endogenous or exogenous abscisic acid level. It appears to be a member of plant-specific gene family that includes late embryo-abundant and zinc-IAA-induced proteins in other plants. The mRNA is cell-to-cell mobile.                                                                                                                                   | 55.04  | 118.61  | 0.46 | 3.13E-04 | 9.23E-04 |
| 5769 | 7 | F2-3 vs. S2-3 | 254291_at  | AT4G23010 | UDP-galactose transporter 2;(source:Araport11)<br>Encodes a chromatin-associated protein that specifically binds histones H3 and H4 and contributes to modulation of Arabidopsis chromatin structure and function.                                                                                                                                                                                                                                                                                              | 237.35 | 520.03  | 0.46 | 5.30E-04 | 1.38E-03 |
| 5770 | 7 | F2-3 vs. S2-3 | 253977_at  | AT4G26630 | prohibitin 1 (Atphb1)                                                                                                                                                                                                                                                                                                                                                                                                                                                                                           | 29.94  | 65.03   | 0.46 | 5.55E-05 | 2.55E-04 |
| 5771 | 7 | F2-3 vs. S2-3 | 263375_s_a | AT4G28510 | HIT-type Zinc finger family protein;(source:Araport11)                                                                                                                                                                                                                                                                                                                                                                                                                                                          | 431.08 | 940.64  | 0.46 | 7.04E-04 | 1.72E-03 |
| 5772 | 7 | F2-3 vs. S2-3 | 253761_at  | AT4G28820 | Leucine-rich receptor-like protein kinase family protein;(source:Araport11)                                                                                                                                                                                                                                                                                                                                                                                                                                     | 33.46  | 73.17   | 0.46 | 4.31E-05 | 2.13E-04 |
| 5773 | 7 | F2-3 vs. S2-3 | 253078_at  | AT4G36180 | Ubiquitin fusion degradation UFD1 family protein;(source:Araport11)                                                                                                                                                                                                                                                                                                                                                                                                                                             | 10.67  | 23.4    | 0.46 | 1.13E-04 | 4.30E-04 |
| 5774 | 7 | F2-3 vs. S2-3 | 252931_at  | AT4G38930 | RNA-binding KH domain-containing protein;(source:Araport11)                                                                                                                                                                                                                                                                                                                                                                                                                                                     | 11.97  | 25.94   | 0.46 | 1.66E-05 | 1.06E-04 |
| 5775 | 7 | F2-3 vs. S2-3 | 246060_at  | AT5G08420 | Encodes arabinogalactan-protein (AGP4) that is expressed in female reproductive tissues. It is involved in promoting degeneration of the persistent synergid after fertilization. In mutant ovules, the persistent synergid does not degrade resulting in polytuby.                                                                                                                                                                                                                                             | 13.22  | 28.66   | 0.46 | 7.05E-04 | 1.73E-03 |
| 5776 | 7 | F2-3 vs. S2-3 | 250437_at  | AT5G10430 | alpha/beta-Hydrolases superfamily protein;(source:Araport11)                                                                                                                                                                                                                                                                                                                                                                                                                                                    | 76.46  | 164.44  | 0.46 | 1.50E-05 | 9.94E-05 |
| 5777 | 7 | F2-3 vs. S2-3 | 246124_at  | AT5G20060 | One of several nuclear-encoded ClpPs (caseinolytic protease). Contains a highly conserved catalytic triad of Ser-type proteases (Ser-His-Asp). The name reflects nomenclature described in Adam et. al (2001).                                                                                                                                                                                                                                                                                                  | 34.59  | 75.93   | 0.46 | 6.94E-05 | 2.97E-04 |
| 5778 | 7 | F2-3 vs. S2-3 | 249873_at  | AT5G23140 | polyamine-modulated factor 1-binding protein;(source:Araport11)                                                                                                                                                                                                                                                                                                                                                                                                                                                 | 13.04  | 28.53   | 0.46 | 5.50E-05 | 2.54E-04 |
| 5779 | 7 | F2-3 vs. S2-3 | 246905_at  | AT5G25570 | Similar to SKP1 in yeast and humans which are involved in mitotic cell cycle control and ubiquitin mediated proteolysis.                                                                                                                                                                                                                                                                                                                                                                                        | 21.79  | 46.87   | 0.46 | 1.51E-05 | 9.98E-05 |
| 5780 | 7 | F2-3 vs. S2-3 | 249228_at  | AT5G42190 | Putative homolog of mammalian BLOC-1 Subunit 2. Protein - protein interaction with BLOS1.                                                                                                                                                                                                                                                                                                                                                                                                                       | 19.56  | 42.52   | 0.46 | 1.91E-05 | 1.17E-04 |
| 5781 | 7 | F2-3 vs. S2-3 | 248587_at  | AT5G49550 | O-Glycosyl hydrolases family 17 protein;(source:Araport11)                                                                                                                                                                                                                                                                                                                                                                                                                                                      | 152.03 | 332.19  | 0.46 | 8.70E-06 | 6.82E-05 |
| 5782 | 7 | F2-3 vs. S2-3 | 247963_at  | AT5G56590 | PRP18a is one of two paralogs (the other being PRP18b) which are highly similar to the step II splicing factors in yeast. Loss of function mutations show defects in alternative splicing, mostly intron retention events.                                                                                                                                                                                                                                                                                      | 159.27 | 357.03  | 0.45 | 8.07E-05 | 3.34E-04 |
| 5783 | 7 | F2-3 vs. S2-3 | 263116_s_a | AT1G03140 | hexokinase-1 protein;(source:Araport11)                                                                                                                                                                                                                                                                                                                                                                                                                                                                         | 20.68  | 46.06   | 0.45 | 1.58E-05 | 1.03E-04 |
| 5784 | 7 | F2-3 vs. S2-3 | 264579_at  | AT1G05205 | polymerase delta 4;(source:Araport11)                                                                                                                                                                                                                                                                                                                                                                                                                                                                           | 39.59  | 88.76   | 0.45 | 5.64E-05 | 2.58E-04 |
| 5785 | 7 | F2-3 vs. S2-3 | 264674_at  | AT1G09815 | Sec14p-like phosphatidylinositol transfer family protein;(source:Araport11)                                                                                                                                                                                                                                                                                                                                                                                                                                     | 35.32  | 79.18   | 0.45 | 1.80E-04 | 6.07E-04 |
| 5786 | 7 | F2-3 vs. S2-3 | 263226_at  | AT1G30690 | Radical SAM superfamily protein;(source:Araport11)                                                                                                                                                                                                                                                                                                                                                                                                                                                              | 26.12  | 57.81   | 0.45 | 4.13E-04 | 1.14E-03 |
| 5787 | 7 | F2-3 vs. S2-3 | 264222_at  | AT1G60230 | AT hook motif DNA-binding family protein;(source:Araport11)                                                                                                                                                                                                                                                                                                                                                                                                                                                     | 30.66  | 68.71   | 0.45 | 2.21E-05 | 1.30E-04 |
| 5788 | 7 | F2-3 vs. S2-3 | 261548_at  | AT1G63480 | Encodes a member of the X8-GPI family of proteins. It localizes to the plasmodesmata and is predicted to bind callose.                                                                                                                                                                                                                                                                                                                                                                                          | 105.96 | 233.27  | 0.45 | 2.67E-04 | 8.15E-04 |
| 5789 | 7 | F2-3 vs. S2-3 | 260352_at  | AT1G69295 | Encodes a homeodomain leucine zipper class I (HD-Zip I) protein which is expressed during the seed-to-seedling transition, regulates some of the network nodes, and affects late seedling establishment. Knock-out mutants for athb13 showed increased primary root length as compared with wild type (Col-0) seedlings, suggesting that this transcription factor is a negative regulator of early root growth, possibly repressing cell division and/or cell elongation or the length of time cells elongate. | 38.51  | 86.34   | 0.45 | 9.41E-04 | 2.18E-03 |
| 5790 | 7 | F2-3 vs. S2-3 | 260395_at  | AT1G69780 | caspase-6 protein;(source:Araport11)                                                                                                                                                                                                                                                                                                                                                                                                                                                                            | 31.46  | 69.35   | 0.45 | 4.19E-04 | 1.15E-03 |
| 5791 | 7 | F2-3 vs. S2-3 | 265895_at  | AT2G15000 | Encodes a WD-40 repeat protein similar to yeast MSI1.                                                                                                                                                                                                                                                                                                                                                                                                                                                           | 36     | 80.91   | 0.45 | 5.42E-04 | 1.41E-03 |
| 5792 | 7 | F2-3 vs. S2-3 | 265383_at  | AT2G16780 | Encodes a member of the histidine kinase family.                                                                                                                                                                                                                                                                                                                                                                                                                                                                | 17.22  | 38.08   | 0.45 | 4.99E-04 | 1.32E-03 |
| 5793 | 7 | F2-3 vs. S2-3 | 264790_at  | AT2G17820 | Encodes a novel subtilisin-like serine protease.                                                                                                                                                                                                                                                                                                                                                                                                                                                                | 71.74  | 159.16  | 0.45 | 7.28E-04 | 1.76E-03 |
| 5794 | 7 | F2-3 vs. S2-3 | 267465_at  | AT2G19170 | membrane-associated progesterone binding protein 2;(source:Araport11)                                                                                                                                                                                                                                                                                                                                                                                                                                           | 175.61 | 391.94  | 0.45 | 9.67E-05 | 3.81E-04 |
| 5795 | 7 | F2-3 vs. S2-3 | 263534_at  | AT2G24940 |                                                                                                                                                                                                                                                                                                                                                                                                                                                                                                                 |        |         |      |          |          |

|      |   |               |           |           |                                                                                                                                                                                                                                                                                                                                                                                                                                                                                                                                                                                                                                                                                                                                                                                                                                                                                                                                                                                                                                                                                                                                                                                       |         |         |      |          |          |
|------|---|---------------|-----------|-----------|---------------------------------------------------------------------------------------------------------------------------------------------------------------------------------------------------------------------------------------------------------------------------------------------------------------------------------------------------------------------------------------------------------------------------------------------------------------------------------------------------------------------------------------------------------------------------------------------------------------------------------------------------------------------------------------------------------------------------------------------------------------------------------------------------------------------------------------------------------------------------------------------------------------------------------------------------------------------------------------------------------------------------------------------------------------------------------------------------------------------------------------------------------------------------------------|---------|---------|------|----------|----------|
|      |   |               |           |           | Identified as a leaf form mutant by Redei having serrated leaves. Further analysis of the single loss of function allele indicated pleiotropic effects extending to many aspects of shoot development such as taller meristems, alterations in phase transition, phyllotaxy and branching. Encodes a single zinc finger containing protein that is expressed in meristems and organ primordia and forms a complex with both AtCBC (cap binding complex) proteins to control alternative splicing.                                                                                                                                                                                                                                                                                                                                                                                                                                                                                                                                                                                                                                                                                     |         |         |      |          |          |
| 5796 | 7 | F2-3 vs. S2-3 | 266315_at | AT2G27100 |                                                                                                                                                                                                                                                                                                                                                                                                                                                                                                                                                                                                                                                                                                                                                                                                                                                                                                                                                                                                                                                                                                                                                                                       | 57.39   | 127.29  | 0.45 | 5.61E-04 | 1.45E-03 |
| 5797 | 7 | F2-3 vs. S2-3 | 267349_at | AT2G40010 | Ribosomal protein L10 family protein;(source:Araport11)                                                                                                                                                                                                                                                                                                                                                                                                                                                                                                                                                                                                                                                                                                                                                                                                                                                                                                                                                                                                                                                                                                                               | 20.97   | 46.41   | 0.45 | 1.92E-05 | 1.17E-04 |
| 5798 | 7 | F2-3 vs. S2-3 | 260610_at | AT2G43680 | Member of IQ67 (CaM binding) domain containing family.                                                                                                                                                                                                                                                                                                                                                                                                                                                                                                                                                                                                                                                                                                                                                                                                                                                                                                                                                                                                                                                                                                                                | 15.55   | 34.51   | 0.45 | 5.27E-04 | 1.38E-03 |
|      |   |               |           |           | Encodes ARL, a gene similar to ARGOS involved in cell expansion-dependent organ growth. Upregulated by brassinosteroid. Acts downstream of BRI1. The mRNA is cell-to-cell mobile.                                                                                                                                                                                                                                                                                                                                                                                                                                                                                                                                                                                                                                                                                                                                                                                                                                                                                                                                                                                                     |         |         |      |          |          |
| 5799 | 7 | F2-3 vs. S2-3 | 267230_at | AT2G44080 |                                                                                                                                                                                                                                                                                                                                                                                                                                                                                                                                                                                                                                                                                                                                                                                                                                                                                                                                                                                                                                                                                                                                                                                       | 112.89  | 253.16  | 0.45 | 3.09E-05 | 1.66E-04 |
| 5800 | 7 | F2-3 vs. S2-3 | 266106_at | AT2G45170 | Involved in autophagy. Under nutrient starvation the protein localizes to autophagosomes. Ribosomal protein L12/ ATP-dependent Clp protease adaptor protein ClpS family                                                                                                                                                                                                                                                                                                                                                                                                                                                                                                                                                                                                                                                                                                                                                                                                                                                                                                                                                                                                               | 13.1    | 29.19   | 0.45 | 3.22E-05 | 1.71E-04 |
| 5801 | 7 | F2-3 vs. S2-3 | 258466_at | AT3G06040 | protein;(source:Araport11)                                                                                                                                                                                                                                                                                                                                                                                                                                                                                                                                                                                                                                                                                                                                                                                                                                                                                                                                                                                                                                                                                                                                                            | 25.5    | 56.53   | 0.45 | 1.70E-05 | 1.08E-04 |
| 5802 | 7 | F2-3 vs. S2-3 | 258821_at | AT3G07230 | wound-responsive protein-like protein;(source:Araport11)                                                                                                                                                                                                                                                                                                                                                                                                                                                                                                                                                                                                                                                                                                                                                                                                                                                                                                                                                                                                                                                                                                                              | 756.95  | 1684.29 | 0.45 | 7.13E-04 | 1.74E-03 |
| 5803 | 7 | F2-3 vs. S2-3 | 259250_at | AT3G07580 | hypothetical protein;(source:Araport11)                                                                                                                                                                                                                                                                                                                                                                                                                                                                                                                                                                                                                                                                                                                                                                                                                                                                                                                                                                                                                                                                                                                                               | 22.2    | 49.42   | 0.45 | 1.16E-04 | 4.36E-04 |
| 5804 | 7 | F2-3 vs. S2-3 | 258713_at | AT3G09735 | S1FA-like DNA-binding protein;(source:Araport11)                                                                                                                                                                                                                                                                                                                                                                                                                                                                                                                                                                                                                                                                                                                                                                                                                                                                                                                                                                                                                                                                                                                                      | 75.45   | 166.78  | 0.45 | 2.39E-04 | 7.47E-04 |
|      |   |               |           |           | MUT9-like protein kinase. Contributes to phosphorylation of photoexcited CRY2. Interaction with CRY2 occurs via the non catalytic PPKC domain.MLK4 phosphorylates the conserved H2A serine 95 residue. Synthetic mutants that cannot phosphorylate H2AS95 fail to complement the late flowering phenotype suggesting that MLK4 promotes long day flowering via phosphorylation.MLK4 is required for H2A295 phosphorylation of GI.                                                                                                                                                                                                                                                                                                                                                                                                                                                                                                                                                                                                                                                                                                                                                     |         |         |      |          |          |
| 5805 | 7 | F2-3 vs. S2-3 | 256783_at | AT3G13670 |                                                                                                                                                                                                                                                                                                                                                                                                                                                                                                                                                                                                                                                                                                                                                                                                                                                                                                                                                                                                                                                                                                                                                                                       | 127.07  | 280.08  | 0.45 | 2.29E-04 | 7.27E-04 |
| 5806 | 7 | F2-3 vs. S2-3 | 257922_at | AT3G23150 | Involved in ethylene perception in ArabidopsisThe mRNA is cell-to-cell mobile.                                                                                                                                                                                                                                                                                                                                                                                                                                                                                                                                                                                                                                                                                                                                                                                                                                                                                                                                                                                                                                                                                                        | 35.81   | 79.38   | 0.45 | 1.52E-04 | 5.36E-04 |
| 5807 | 7 | F2-3 vs. S2-3 | 257615_at | AT3G26510 | Octicosapeptide/Phox/Bem1p family protein;(source:Araport11)                                                                                                                                                                                                                                                                                                                                                                                                                                                                                                                                                                                                                                                                                                                                                                                                                                                                                                                                                                                                                                                                                                                          | 77.72   | 173.77  | 0.45 | 2.33E-05 | 1.35E-04 |
|      |   |               |           |           | Catalyzes the first step in the de novo synthesis of GDP-L-fucose. Loss of function mutations result in reduced levels of fucosylation and decreased freezing tolerance.                                                                                                                                                                                                                                                                                                                                                                                                                                                                                                                                                                                                                                                                                                                                                                                                                                                                                                                                                                                                              |         |         |      |          |          |
| 5808 | 7 | F2-3 vs. S2-3 | 252121_at | AT3G51160 |                                                                                                                                                                                                                                                                                                                                                                                                                                                                                                                                                                                                                                                                                                                                                                                                                                                                                                                                                                                                                                                                                                                                                                                       | 17.62   | 39.05   | 0.45 | 6.10E-04 | 1.55E-03 |
| 5809 | 7 | F2-3 vs. S2-3 | 251454_at | AT3G60080 | RING/U-box superfamily protein;(source:Araport11)                                                                                                                                                                                                                                                                                                                                                                                                                                                                                                                                                                                                                                                                                                                                                                                                                                                                                                                                                                                                                                                                                                                                     | 20.26   | 45.51   | 0.45 | 6.95E-04 | 1.71E-03 |
|      |   |               |           |           | At3g60190 encodes Arabidopsis dynamin-related protein 1E, DRP1E, also known as EDR3, ADL4 and ADL1E, which is 624 amino acid residues long, has a predicted mass of 69.8 kDa and a pI of 7.5. Dynamin-related protein 1E belongs to a plant-specific subclass of dynamin-related proteins (DRP1), consisting of five members in Arabidopsis (A, B, C, D, E). This class is characterized by having an N-terminal GTPase domain, a central 'dynamin 2' domain and a C-terminal GTPase effector domain (GED), a typical structure for plant dynamin-related proteins. However, this class lacks a PH domain and a proline-rich domain, which are found in classical animal dynamin-like proteins. Based on work on animal dynamins, the plant DRP1 proteins should be able to form polymeric structures that wrap around membranes to facilitate membrane tubulation and pinching off of vesicles, processes that are essential to vesicle trafficking and membrane compartmentalization. Theedr3 mutation causes a P77L substitution in the G2 motif of the GTPase domain of DRP1E.edr3 mutant Arabidopsis plants display enhanced cell death in response to powdery mildew infection. |         |         |      |          |          |
| 5810 | 7 | F2-3 vs. S2-3 | 251429_at | AT3G60190 |                                                                                                                                                                                                                                                                                                                                                                                                                                                                                                                                                                                                                                                                                                                                                                                                                                                                                                                                                                                                                                                                                                                                                                                       | 17.81   | 39.21   | 0.45 | 4.94E-05 | 2.35E-04 |
| 5811 | 7 | F2-3 vs. S2-3 | 251341_at | AT3G60770 | Ribosomal protein S13/S15;(source:Araport11)                                                                                                                                                                                                                                                                                                                                                                                                                                                                                                                                                                                                                                                                                                                                                                                                                                                                                                                                                                                                                                                                                                                                          | 1069.3  | 2356.15 | 0.45 | 1.54E-04 | 5.42E-04 |
| 5812 | 7 | F2-3 vs. S2-3 | 251337_at | AT3G60820 | Encodes 20S proteasome beta subunit PBF1 (PBF1).                                                                                                                                                                                                                                                                                                                                                                                                                                                                                                                                                                                                                                                                                                                                                                                                                                                                                                                                                                                                                                                                                                                                      | 80.12   | 177.41  | 0.45 | 1.68E-04 | 5.75E-04 |
| 5813 | 7 | F2-3 vs. S2-3 | 251357_at | AT3G61110 | Arabidopsis ribosomal protein                                                                                                                                                                                                                                                                                                                                                                                                                                                                                                                                                                                                                                                                                                                                                                                                                                                                                                                                                                                                                                                                                                                                                         | 2466.25 | 5513.18 | 0.45 | 1.96E-05 | 1.19E-04 |
| 5814 | 7 | F2-3 vs. S2-3 | 251261_at | AT3G62110 | Pectin lyase-like superfamily protein;(source:Araport11)                                                                                                                                                                                                                                                                                                                                                                                                                                                                                                                                                                                                                                                                                                                                                                                                                                                                                                                                                                                                                                                                                                                              | 11.38   | 25.02   | 0.45 | 3.13E-05 | 1.67E-04 |
| 5815 | 7 | F2-3 vs. S2-3 | 255221_at | AT4G05150 | Octicosapeptide/Phox/Bem1p family protein;(source:Araport11)                                                                                                                                                                                                                                                                                                                                                                                                                                                                                                                                                                                                                                                                                                                                                                                                                                                                                                                                                                                                                                                                                                                          | 200.45  | 446.11  | 0.45 | 4.30E-05 | 2.13E-04 |
| 5816 | 7 | F2-3 vs. S2-3 | 245340_at | AT4G14420 | HR-like lesion-inducing protein-like protein;(source:Araport11)                                                                                                                                                                                                                                                                                                                                                                                                                                                                                                                                                                                                                                                                                                                                                                                                                                                                                                                                                                                                                                                                                                                       | 79.85   | 177.5   | 0.45 | 5.71E-05 | 2.60E-04 |
| 5817 | 7 | F2-3 vs. S2-3 | 245415_at | AT4G17330 | gene of unknown function expressed in seedlings, flower buds and stems                                                                                                                                                                                                                                                                                                                                                                                                                                                                                                                                                                                                                                                                                                                                                                                                                                                                                                                                                                                                                                                                                                                | 128.84  | 284.78  | 0.45 | 5.53E-05 | 2.55E-04 |
| 5818 | 7 | F2-3 vs. S2-3 | 254355_at | AT4G22380 | Ribosomal protein L7Ae/L30e/S12e/Gadd45 family protein;(source:Araport11)                                                                                                                                                                                                                                                                                                                                                                                                                                                                                                                                                                                                                                                                                                                                                                                                                                                                                                                                                                                                                                                                                                             | 92.4    | 204.5   | 0.45 | 1.29E-05 | 8.96E-05 |
| 5819 | 7 | F2-3 vs. S2-3 | 254137_at | AT4G24930 | thylakoid lumenal 17.9 kDa protein, chloroplast;(source:Araport11)                                                                                                                                                                                                                                                                                                                                                                                                                                                                                                                                                                                                                                                                                                                                                                                                                                                                                                                                                                                                                                                                                                                    | 48.34   | 106.68  | 0.45 | 1.01E-04 | 3.95E-04 |
| 5820 | 7 | F2-3 vs. S2-3 | 253368_at | AT4G33200 | member of Myosin-like proteins                                                                                                                                                                                                                                                                                                                                                                                                                                                                                                                                                                                                                                                                                                                                                                                                                                                                                                                                                                                                                                                                                                                                                        | 74.08   | 165.3   | 0.45 | 1.57E-04 | 5.50E-04 |
| 5821 | 7 | F2-3 vs. S2-3 | 250819_at | AT5G05100 | R3H RNA binding protein that interacts with AGO2 and miRNA.                                                                                                                                                                                                                                                                                                                                                                                                                                                                                                                                                                                                                                                                                                                                                                                                                                                                                                                                                                                                                                                                                                                           | 67.17   | 147.82  | 0.45 | 9.74E-04 | 2.24E-03 |
| 5822 | 7 | F2-3 vs. S2-3 | 250768_at | AT5G05670 | signal recognition particle binding protein;(source:Araport11)                                                                                                                                                                                                                                                                                                                                                                                                                                                                                                                                                                                                                                                                                                                                                                                                                                                                                                                                                                                                                                                                                                                        | 102.04  | 225.34  | 0.45 | 6.27E-04 | 1.58E-03 |
| 5823 | 7 | F2-3 vs. S2-3 | 250584_at | AT5G07590 | Transducin/WD40 repeat-like superfamily protein;(source:Araport11)                                                                                                                                                                                                                                                                                                                                                                                                                                                                                                                                                                                                                                                                                                                                                                                                                                                                                                                                                                                                                                                                                                                    | 34.6    | 76.54   | 0.45 | 5.06E-04 | 1.33E-03 |

|      |   |               |           |           |                                                                                                                                                                                                                                                                                                                                                                                                                                                                                                                                                                                                                                                                                                                                                                                                                                                                                                                                                                                                                                                                                                            |         |         |      |          |          |
|------|---|---------------|-----------|-----------|------------------------------------------------------------------------------------------------------------------------------------------------------------------------------------------------------------------------------------------------------------------------------------------------------------------------------------------------------------------------------------------------------------------------------------------------------------------------------------------------------------------------------------------------------------------------------------------------------------------------------------------------------------------------------------------------------------------------------------------------------------------------------------------------------------------------------------------------------------------------------------------------------------------------------------------------------------------------------------------------------------------------------------------------------------------------------------------------------------|---------|---------|------|----------|----------|
| 5824 | 7 | F2-3 vs. S2-3 | 246513_at | AT5G15680 | ARM repeat superfamily protein;(source:Araport11)<br><br>Encodes a component of the putative Arabidopsis THO/TREX complex: THO1 or HPR1 (At5g09860), THO2 (At1g24706), THO3 or TEX1 (At5g56130), THO5 (At5g42920, At1g45233), THO6 (At2g19430), and THO7 (At5g16790, At3g02950). THO/TREX complexes in animals have been implicated in the transport of mRNA precursors. Mutants of THO3/TEX1, THO1, THO6 accumulate reduced amount of small interfering (si)RNA, suggesting a role of the putative Arabidopsis THO/TREX in siRNA biosynthesis.                                                                                                                                                                                                                                                                                                                                                                                                                                                                                                                                                            | 73.91   | 164.94  | 0.45 | 5.79E-04 | 1.49E-03 |
| 5825 | 7 | F2-3 vs. S2-3 | 249181_at | AT5G42920 | Ribosomal protein L31e family protein;(source:Araport11)                                                                                                                                                                                                                                                                                                                                                                                                                                                                                                                                                                                                                                                                                                                                                                                                                                                                                                                                                                                                                                                   | 15.09   | 33.87   | 0.45 | 1.50E-04 | 5.32E-04 |
| 5826 | 7 | F2-3 vs. S2-3 | 247978_at | AT5G56710 | RNA polymerase alpha subunit                                                                                                                                                                                                                                                                                                                                                                                                                                                                                                                                                                                                                                                                                                                                                                                                                                                                                                                                                                                                                                                                               | 1384.92 | 3104.47 | 0.45 | 3.74E-05 | 1.92E-04 |
| 5827 | 7 | F2-3 vs. S2-3 | 244978_at | ATCG00740 | Encodes cytosolic ribosomal protein S15.                                                                                                                                                                                                                                                                                                                                                                                                                                                                                                                                                                                                                                                                                                                                                                                                                                                                                                                                                                                                                                                                   | 334.59  | 749.02  | 0.45 | 5.76E-04 | 1.48E-03 |
| 5828 | 7 | F2-3 vs. S2-3 | 263667_at | AT1G04270 | decoy;(source:Araport11)                                                                                                                                                                                                                                                                                                                                                                                                                                                                                                                                                                                                                                                                                                                                                                                                                                                                                                                                                                                                                                                                                   | 185.32  | 419.03  | 0.44 | 1.43E-05 | 9.63E-05 |
| 5829 | 7 | F2-3 vs. S2-3 | 260781_at | AT1G14620 | S18 ribosomal protein involved in the binding of f-Met tRNA during initiation of mRNA translation. Expression restricted to meristems. Mutant phenotype-pointed first leaves,reduced fresh weight, growth retardation.                                                                                                                                                                                                                                                                                                                                                                                                                                                                                                                                                                                                                                                                                                                                                                                                                                                                                     | 57.21   | 131.08  | 0.44 | 7.36E-04 | 1.78E-03 |
| 5830 | 7 | F2-3 vs. S2-3 | 264203_at | AT1G22780 | Encodes a chloroplast envelope Ca2+-ATPase with an N-terminal autoinhibitor.                                                                                                                                                                                                                                                                                                                                                                                                                                                                                                                                                                                                                                                                                                                                                                                                                                                                                                                                                                                                                               | 464.56  | 1066.5  | 0.44 | 1.44E-05 | 9.67E-05 |
| 5831 | 7 | F2-3 vs. S2-3 | 261650_at | AT1G27770 | Member of the E2F transcription factors, (cell cycle genes), key components of the cyclin D/retinoblastoma/E2F pathway. AtE2Fc is regulated by a balance between gene expression and ubiquitin-proteasome proteolysis. AtE2Fc might play a role in cell division and during the transition from skotomorphogenesis to photomorphogenesis. E2Fc has been shown to interact with DPB in its nonphosphorylated form; when E2Fc is phosphorylated, the formation of the E2Fc/DPB heterodimer is lost. E2Fc is required for miR396 activity on cell proliferation under UV-B. Its role is independent of E2Fe, probably modulating DNA damage responses through the regulation of SOG1 and ATR transcript levels.                                                                                                                                                                                                                                                                                                                                                                                               | 22.27   | 51.15   | 0.44 | 1.15E-05 | 8.34E-05 |
| 5832 | 7 | F2-3 vs. S2-3 | 261741_at | AT1G47870 | nucleolin;(source:Araport11)                                                                                                                                                                                                                                                                                                                                                                                                                                                                                                                                                                                                                                                                                                                                                                                                                                                                                                                                                                                                                                                                               | 70.86   | 159.47  | 0.44 | 1.63E-04 | 5.66E-04 |
| 5833 | 7 | F2-3 vs. S2-3 | 259617_at | AT1G47970 | Encodes a LysM-containing receptor-like kinase. Induction of chitin-responsive genes by chitin treatment is not blocked in the mutant. Based on protein sequence alignment analysis, it has a typical RD signaling domain in its catalytic loop and possesses autophosphorylation activity.It is required for the suppression of defense responses in absence of pathogen infection or upon abscisic acid treatment. Loss-of-function mutants display enhanced resistance to Botrytis cinerea and Pectobacterium carotovorum. Its expression is repressed by pathogen infection and biological elicitors and is induced abscisic acid.Expression is strongly repressed by elicitors and fungal infection, and is induced by the hormone abscisic acid (ABA). Insertional mutants show increased expression of PHYTOALEXIN-DEFICIENT 3 (PAD3), enhanced resistance to Botrytis cinerea and Pectobacterium carotovorum infection and reduced physiological responses to ABA, suggesting that LYK3 is important for the cross-talk between signaling pathways activated by ABA and pathogens (PMID:24639336). | 102.86  | 231.29  | 0.44 | 8.38E-05 | 3.42E-04 |
| 5834 | 7 | F2-3 vs. S2-3 | 246371_at | AT1G51940 | 40S ribosomal protein;(source:Araport11)                                                                                                                                                                                                                                                                                                                                                                                                                                                                                                                                                                                                                                                                                                                                                                                                                                                                                                                                                                                                                                                                   | 56.27   | 127.93  | 0.44 | 6.00E-06 | 5.18E-05 |
| 5835 | 7 | F2-3 vs. S2-3 | 246400_at | AT1G57540 | Encodes a bidirectional amino acid transporter that can transport ala, arg, glu and lys, GABA but not pro with both export and import activity. Its expression is localized in the vascular tissues suggesting a function in amino acids export from the phloem into sink tissue.                                                                                                                                                                                                                                                                                                                                                                                                                                                                                                                                                                                                                                                                                                                                                                                                                          | 104.79  | 240.62  | 0.44 | 1.13E-05 | 8.27E-05 |
| 5836 | 7 | F2-3 vs. S2-3 | 265790_at | AT2G01170 | Growth regulating factor encoding transcription activator. One of the nine members of a GRF gene family, containing nuclear targeting domain. Mutants result in smaller leaves indicating the role of the gene in leaf development. Expressed in root, shoot and flower                                                                                                                                                                                                                                                                                                                                                                                                                                                                                                                                                                                                                                                                                                                                                                                                                                    | 56.53   | 129.73  | 0.44 | 4.93E-05 | 2.34E-04 |
| 5837 | 7 | F2-3 vs. S2-3 | 266797_at | AT2G22840 | histone 4                                                                                                                                                                                                                                                                                                                                                                                                                                                                                                                                                                                                                                                                                                                                                                                                                                                                                                                                                                                                                                                                                                  | 51.31   | 115.73  | 0.44 | 3.37E-05 | 1.78E-04 |
| 5838 | 7 | F2-3 vs. S2-3 | 266226_at | AT2G28740 | Encodes a WDXR motif-containing protein that is required for gametogenesis, seed and endosperm development.                                                                                                                                                                                                                                                                                                                                                                                                                                                                                                                                                                                                                                                                                                                                                                                                                                                                                                                                                                                                | 24.04   | 55      | 0.44 | 1.89E-04 | 6.33E-04 |
| 5839 | 7 | F2-3 vs. S2-3 | 267004_at | AT2G34260 |                                                                                                                                                                                                                                                                                                                                                                                                                                                                                                                                                                                                                                                                                                                                                                                                                                                                                                                                                                                                                                                                                                            | 47.84   | 108.1   | 0.44 | 4.62E-04 | 1.24E-03 |

|      |   |               |            |           |                                                                                                                                                                                                                                                                                                                                                                                                                                                                                                                                                                                                                                                                                                                                                                                                                                                                                                                                                                                                                    |        |        |      |          |          |
|------|---|---------------|------------|-----------|--------------------------------------------------------------------------------------------------------------------------------------------------------------------------------------------------------------------------------------------------------------------------------------------------------------------------------------------------------------------------------------------------------------------------------------------------------------------------------------------------------------------------------------------------------------------------------------------------------------------------------------------------------------------------------------------------------------------------------------------------------------------------------------------------------------------------------------------------------------------------------------------------------------------------------------------------------------------------------------------------------------------|--------|--------|------|----------|----------|
| 5840 | 7 | F2-3 vs. S2-3 | 252272_at  | AT3G49670 | Encodes a CLAVATA1-related receptor kinase-like protein required for both shoot and flower meristem function. Very similar to BAM1, with more than 85% a.a. identity. It has a broad expression pattern and is involved in vascular strand development in the leaf, control of leaf shape, size and symmetry, male gametophyte development and ovule specification and function. Anthers of double mutants (bam1bam2) appeared abnormal at a very early stage and lack the endothecium, middle, and tapetum layers. Further analyses revealed that cells interior to the epidermis (in anther tissue) acquire some characteristics of pollen mother cells (PMCs), suggesting defects in cell fate specification. The pollen mother-like cells degenerate before the completion of meiosis, suggesting that these cells are defective. In addition, the BAM2 expression pattern supports both an early role in promoting somatic cell fates and a subsequent function in the PMCs. The mRNA is cell-to-cell mobile. | 15.82  | 36.26  | 0.44 | 1.26E-04 | 4.63E-04 |
| 5841 | 7 | F2-3 vs. S2-3 | 251985_at  | AT3G53220 | Thioredoxin superfamily protein;(source:Araport11)                                                                                                                                                                                                                                                                                                                                                                                                                                                                                                                                                                                                                                                                                                                                                                                                                                                                                                                                                                 | 10.5   | 23.79  | 0.44 | 1.27E-04 | 4.67E-04 |
| 5842 | 7 | F2-3 vs. S2-3 | 251802_at  | AT3G55380 | ubiquitin-conjugating enzyme 14;(source:Araport11)                                                                                                                                                                                                                                                                                                                                                                                                                                                                                                                                                                                                                                                                                                                                                                                                                                                                                                                                                                 | 83.21  | 189.29 | 0.44 | 1.59E-05 | 1.03E-04 |
| 5843 | 7 | F2-3 vs. S2-3 | 251333_at  | AT3G61690 | Putative TNAase                                                                                                                                                                                                                                                                                                                                                                                                                                                                                                                                                                                                                                                                                                                                                                                                                                                                                                                                                                                                    | 43.27  | 98.23  | 0.44 | 9.50E-06 | 7.29E-05 |
| 5844 | 7 | F2-3 vs. S2-3 | 254950_at  | AT4G10810 | hypothetical protein;(source:Araport11)                                                                                                                                                                                                                                                                                                                                                                                                                                                                                                                                                                                                                                                                                                                                                                                                                                                                                                                                                                            | 18.85  | 43.01  | 0.44 | 7.16E-04 | 1.75E-03 |
| 5845 | 7 | F2-3 vs. S2-3 | 254815_at  | AT4G12420 | Encodes a protein of unknown function involved in directed root tip growth. It is a member of 19-member gene family and is distantly related structurally to the multiple-copper oxidases ascorbate oxidase and laccase, though it lacks the copper-binding domains. The protein is glycosylated and GPI-anchored. It is localized to the plasma membrane and the cell wall. The gene is expressed most strongly in expanding tissues.                                                                                                                                                                                                                                                                                                                                                                                                                                                                                                                                                                             | 23.46  | 52.96  | 0.44 | 1.73E-05 | 1.09E-04 |
| 5846 | 7 | F2-3 vs. S2-3 | 254238_at  | AT4G23540 | ARM repeat superfamily protein;(source:Araport11)                                                                                                                                                                                                                                                                                                                                                                                                                                                                                                                                                                                                                                                                                                                                                                                                                                                                                                                                                                  | 12.35  | 27.92  | 0.44 | 2.34E-04 | 7.38E-04 |
| 5847 | 7 | F2-3 vs. S2-3 | 253812_at  | AT4G28240 | Member of the wound-induced polypeptide (WIP) family. Positively regulates plant resistance against Pst DC3000 by enhancing PTI responses. LEUNIG regulates floral organ identity, gynoecium and ovule development. Negatively regulates AGAMOUS. Encodes a glutamine-rich protein with seven WD repeats similar to transcriptional corepressors.                                                                                                                                                                                                                                                                                                                                                                                                                                                                                                                                                                                                                                                                  | 63.66  | 144.55 | 0.44 | 7.74E-04 | 1.85E-03 |
| 5848 | 7 | F2-3 vs. S2-3 | 253443_at  | AT4G32551 | Encodes initiation factor 3k (EIF3k).                                                                                                                                                                                                                                                                                                                                                                                                                                                                                                                                                                                                                                                                                                                                                                                                                                                                                                                                                                              | 78.3   | 179.31 | 0.44 | 2.54E-04 | 7.82E-04 |
| 5849 | 7 | F2-3 vs. S2-3 | 253336_at  | AT4G33250 |                                                                                                                                                                                                                                                                                                                                                                                                                                                                                                                                                                                                                                                                                                                                                                                                                                                                                                                                                                                                                    | 380.55 | 861.39 | 0.44 | 3.70E-04 | 1.05E-03 |
| 5850 | 7 | F2-3 vs. S2-3 | 253338_at  | AT4G33430 | Leu-rich receptor Serine/threonine protein kinase. Component of BR signaling that interacts with BRI1 in vitro and in vivo to form a heterodimer. Brassinolide-dependent association of BRI1 and BAK1 in vivo. Phosphorylation of both BRI1 and BAK1 on Thr residues was BR dependent. Although BAK1 and BRI1 alone localize in the plasma membrane, when BAK1 and BRI1 are coexpressed, the heterodimer BAK1/BRI1 they form is localized in the endosome.                                                                                                                                                                                                                                                                                                                                                                                                                                                                                                                                                         | 27.11  | 61.56  | 0.44 | 2.93E-05 | 1.59E-04 |
| 5851 | 7 | F2-3 vs. S2-3 | 250888_at  | AT5G04460 | RING/U-box superfamily protein;(source:Araport11)                                                                                                                                                                                                                                                                                                                                                                                                                                                                                                                                                                                                                                                                                                                                                                                                                                                                                                                                                                  | 31.73  | 71.42  | 0.44 | 4.14E-05 | 2.08E-04 |
| 5852 | 7 | F2-3 vs. S2-3 | 250581_at  | AT5G07300 | Encodes a copine-like protein, which is a member of a newly identified class of calcium-dependent, phospholipid binding proteins that are present in a wide range of organisms.                                                                                                                                                                                                                                                                                                                                                                                                                                                                                                                                                                                                                                                                                                                                                                                                                                    | 13.81  | 31.09  | 0.44 | 6.50E-05 | 2.84E-04 |
| 5853 | 7 | F2-3 vs. S2-3 | 250141_at  | AT5G14640 | shaggy-like kinase 13;(source:Araport11)                                                                                                                                                                                                                                                                                                                                                                                                                                                                                                                                                                                                                                                                                                                                                                                                                                                                                                                                                                           | 291.5  | 655.25 | 0.44 | 4.87E-04 | 1.29E-03 |
| 5854 | 7 | F2-3 vs. S2-3 | 246975_at  | AT5G24890 | stress response NST1-like protein;(source:Araport11)                                                                                                                                                                                                                                                                                                                                                                                                                                                                                                                                                                                                                                                                                                                                                                                                                                                                                                                                                               | 31.08  | 71.26  | 0.44 | 3.14E-05 | 1.68E-04 |
| 5855 | 7 | F2-3 vs. S2-3 | 246103_at  | AT5G28640 | Encodes a protein with similarity to mammalian transcriptional coactivator that is involved in cell proliferation during leaf and flower development. Loss of function mutations have narrow, pointed leaves and narrow floral organs. AN3 interacts with members of the growth regulating factor (GRF) family of transcription factors.                                                                                                                                                                                                                                                                                                                                                                                                                                                                                                                                                                                                                                                                           | 126.88 | 289.13 | 0.44 | 5.88E-05 | 2.65E-04 |
| 5856 | 7 | F2-3 vs. S2-3 | 249443_at  | AT5G39600 | 39S ribosomal protein;(source:Araport11)                                                                                                                                                                                                                                                                                                                                                                                                                                                                                                                                                                                                                                                                                                                                                                                                                                                                                                                                                                           | 50.07  | 114.08 | 0.44 | 8.19E-05 | 3.36E-04 |
| 5857 | 7 | F2-3 vs. S2-3 | 249183_at  | AT5G42990 | ubiquitin-conjugating enzyme 18;(source:Araport11)                                                                                                                                                                                                                                                                                                                                                                                                                                                                                                                                                                                                                                                                                                                                                                                                                                                                                                                                                                 | 80.13  | 182.34 | 0.44 | 2.78E-05 | 1.53E-04 |
| 5858 | 7 | F2-3 vs. S2-3 | 244903_at  | ATMG00660 | hypothetical protein;(source:Araport11)                                                                                                                                                                                                                                                                                                                                                                                                                                                                                                                                                                                                                                                                                                                                                                                                                                                                                                                                                                            | 20.41  | 45.9   | 0.44 | 7.10E-06 | 5.88E-05 |
| 5859 | 7 | F2-3 vs. S2-3 | 264803_at  | AT1G08580 | hypothetical protein;(source:Araport11)                                                                                                                                                                                                                                                                                                                                                                                                                                                                                                                                                                                                                                                                                                                                                                                                                                                                                                                                                                            | 19.4   | 44.81  | 0.43 | 1.41E-04 | 5.05E-04 |
| 5860 | 7 | F2-3 vs. S2-3 | 264883_s_a | AT1G11180 | Secretory carrier membrane protein (SCAMP) family protein;(source:Araport11)                                                                                                                                                                                                                                                                                                                                                                                                                                                                                                                                                                                                                                                                                                                                                                                                                                                                                                                                       | 161.14 | 374.25 | 0.43 | 1.50E-05 | 9.94E-05 |
| 5861 | 7 | F2-3 vs. S2-3 | 260673_at  | AT1G19330 | Evening-expressed key component of Sin3-HDAC complex, which bind directly to the CIRCADIAN CLOCK ASSOCIATED 1 (CCA1) and PSEUDO-RESPONSE REGULATOR 9 (PRR9) promoters and catalyze histone 3 (H3) deacetylation at the cognate regions to repress expression, allowing the declining phase of their expression at dusk.                                                                                                                                                                                                                                                                                                                                                                                                                                                                                                                                                                                                                                                                                            | 82.16  | 191.48 | 0.43 | 4.21E-05 | 2.10E-04 |

|      |   |               |                 |           |                                                                                                                                                                                                                                                                                                                                                                                                                                                                                                                                                                                                                                      |        |         |      |          |          |
|------|---|---------------|-----------------|-----------|--------------------------------------------------------------------------------------------------------------------------------------------------------------------------------------------------------------------------------------------------------------------------------------------------------------------------------------------------------------------------------------------------------------------------------------------------------------------------------------------------------------------------------------------------------------------------------------------------------------------------------------|--------|---------|------|----------|----------|
| 5862 | 7 | F2-3 vs. S2-3 | 245642_at       | AT1G25275 | Thionin-like gene involved in resistance against the beet cyst nematode ( <i>Heterodera schachtii</i> ).<br><br>Encodes an atypical arabinogalactan protein that is localized to the plasma membrane. AGP31 is highly expressed in flowers and vascular tissue and is repressed by jasmonic acid. AGP31 may play a role in vascular tissue function during defense and development.                                                                                                                                                                                                                                                  | 39.22  | 91.9    | 0.43 | 8.59E-05 | 3.48E-04 |
| 5863 | 7 | F2-3 vs. S2-3 | 245688_at       | AT1G28290 | peptidase;(source:Araport11)                                                                                                                                                                                                                                                                                                                                                                                                                                                                                                                                                                                                         | 33.27  | 78.02   | 0.43 | 1.36E-04 | 4.90E-04 |
| 5864 | 7 | F2-3 vs. S2-3 | 262411_at       | AT1G34640 | P-loop nucleoside triphosphate hydrolases superfamily protein with CH (Calponin Homology) domain-containing protein;(source:Araport11)                                                                                                                                                                                                                                                                                                                                                                                                                                                                                               | 102.87 | 238.01  | 0.43 | 3.98E-05 | 2.01E-04 |
| 5865 | 7 | F2-3 vs. S2-3 | 261557_at       | AT1G63640 | hypothetical protein;(source:Araport11)                                                                                                                                                                                                                                                                                                                                                                                                                                                                                                                                                                                              | 53.5   | 123.82  | 0.43 | 3.83E-04 | 1.08E-03 |
| 5866 | 7 | F2-3 vs. S2-3 | 262967_at       | AT1G75730 | D-mannose binding lectin protein with Apple-like carbohydrate-binding domain-containing protein;(source:Araport11)                                                                                                                                                                                                                                                                                                                                                                                                                                                                                                                   | 16.9   | 39.18   | 0.43 | 1.00E-05 | 7.51E-05 |
| 5867 | 7 | F2-3 vs. S2-3 | 264279_s_a<br>t | AT1G78820 | putative proline-rich protein (At2g14890) mRNA, complete The mRNA is cell-to-cell mobile.                                                                                                                                                                                                                                                                                                                                                                                                                                                                                                                                            | 317.27 | 741.9   | 0.43 | 2.88E-04 | 8.63E-04 |
| 5868 | 7 | F2-3 vs. S2-3 | 266588_at       | AT2G14890 | Ribosomal protein L11 family protein;(source:Araport11)                                                                                                                                                                                                                                                                                                                                                                                                                                                                                                                                                                              | 63.41  | 147.93  | 0.43 | 5.82E-04 | 1.49E-03 |
| 5869 | 7 | F2-3 vs. S2-3 | 265445_at       | AT2G37190 | ESSS subunit of NADH:ubiquinone oxidoreductase (complex I) protein;(source:Araport11)                                                                                                                                                                                                                                                                                                                                                                                                                                                                                                                                                | 76.77  | 180.09  | 0.43 | 7.34E-05 | 3.09E-04 |
| 5870 | 7 | F2-3 vs. S2-3 | 265883_at       | AT2G42310 | Ribosomal protein S5 domain 2-like superfamily protein;(source:Araport11)                                                                                                                                                                                                                                                                                                                                                                                                                                                                                                                                                            | 150.16 | 350.28  | 0.43 | 8.03E-04 | 1.91E-03 |
| 5871 | 7 | F2-3 vs. S2-3 | 258576_at       | AT3G04230 | myb-like HTH transcriptional regulator family protein;(source:Araport11)                                                                                                                                                                                                                                                                                                                                                                                                                                                                                                                                                             | 130.84 | 306.53  | 0.43 | 3.40E-05 | 1.79E-04 |
| 5872 | 7 | F2-3 vs. S2-3 | 257855_at       | AT3G13040 | transmembrane protein;(source:Araport11)                                                                                                                                                                                                                                                                                                                                                                                                                                                                                                                                                                                             | 139.74 | 324.64  | 0.43 | 2.82E-05 | 1.55E-04 |
| 5873 | 7 | F2-3 vs. S2-3 | 252390_at       | AT3G47836 | Nucleic acid-binding, OB-fold-like protein;(source:Araport11)                                                                                                                                                                                                                                                                                                                                                                                                                                                                                                                                                                        | 195.35 | 456.41  | 0.43 | 3.10E-04 | 9.16E-04 |
| 5874 | 7 | F2-3 vs. S2-3 | 252297_at       | AT3G48930 | uveal autoantigen with coiled-coil/ankyrin;(source:Araport11)                                                                                                                                                                                                                                                                                                                                                                                                                                                                                                                                                                        | 257.75 | 592.7   | 0.43 | 1.77E-05 | 1.11E-04 |
| 5875 | 7 | F2-3 vs. S2-3 | 245364_at       | AT4G15790 | Encodes a small ubiquitin-like modifier (SUMO) polypeptide that becomes covalently attached to various intracellular protein targets, much like ubiquitination, leading to post-translational modification of those targets.                                                                                                                                                                                                                                                                                                                                                                                                         | 52.42  | 121.78  | 0.43 | 3.48E-05 | 1.82E-04 |
| 5876 | 7 | F2-3 vs. S2-3 | 253952_at       | AT4G26840 | Cytochrome bd ubiquinol oxidase, 14kDa subunit;(source:Araport11)                                                                                                                                                                                                                                                                                                                                                                                                                                                                                                                                                                    | 205.57 | 479.28  | 0.43 | 1.32E-04 | 4.81E-04 |
| 5877 | 7 | F2-3 vs. S2-3 | 253436_at       | AT4G32470 | Key player of retrieval of ER membrane proteins                                                                                                                                                                                                                                                                                                                                                                                                                                                                                                                                                                                      | 532.95 | 1232.67 | 0.43 | 4.83E-05 | 2.31E-04 |
| 5878 | 7 | F2-3 vs. S2-3 | 252913_at       | AT4G39220 | Transmembrane amino acid transporter family protein;(source:Araport11)                                                                                                                                                                                                                                                                                                                                                                                                                                                                                                                                                               | 102.05 | 237.01  | 0.43 | 1.51E-05 | 9.98E-05 |
| 5879 | 7 | F2-3 vs. S2-3 | 251023_at       | AT5G02170 | Encodes a putative mannosyltransferase homolog to human PIG-B and yeast GPI10, both of which are involved in the biosynthesis of glycosylphosphatidylinositol (GPI) anchors. Disruption of the gene affects COBRA-LIKE10 localization, a GPI-anchored protein (GPI-AP) important for pollen tube growth and guidance.                                                                                                                                                                                                                                                                                                                | 19.75  | 46.22   | 0.43 | 4.07E-04 | 1.13E-03 |
| 5880 | 7 | F2-3 vs. S2-3 | 246598_at       | AT5G14850 | calcium-dependent protein kinase (CDPK19) mRNA, complete                                                                                                                                                                                                                                                                                                                                                                                                                                                                                                                                                                             | 149.97 | 345.63  | 0.43 | 5.81E-05 | 2.63E-04 |
| 5881 | 7 | F2-3 vs. S2-3 | 246044_at       | AT5G19450 | ABC-2 type transporter family protein;(source:Araport11)                                                                                                                                                                                                                                                                                                                                                                                                                                                                                                                                                                             | 161.24 | 372.68  | 0.43 | 1.61E-04 | 5.59E-04 |
| 5882 | 7 | F2-3 vs. S2-3 | 248277_at       | AT5G52860 | Encodes a voltage-dependent anion channel (VDAC: AT3G01280/VDAC1, AT5G67500/VDAC2, AT5G15090/VDAC3, AT5G57490/VDAC4, AT5G15090/VDAC5). VDACs are reported to be porin-type, beta-barrel diffusion pores. They are prominently localized in the outer mitochondrial membrane and are involved in metabolite exchange between the organelle and the cytosol.                                                                                                                                                                                                                                                                           | 38.34  | 88.79   | 0.43 | 1.56E-04 | 5.46E-04 |
| 5883 | 7 | F2-3 vs. S2-3 | 247923_at       | AT5G57490 | encodes an SC35-like splicing factor of 35 kD localized to the nuclear specks.                                                                                                                                                                                                                                                                                                                                                                                                                                                                                                                                                       | 47.69  | 109.69  | 0.43 | 6.27E-05 | 2.77E-04 |
| 5884 | 7 | F2-3 vs. S2-3 | 247325_at       | AT5G64200 | Encodes an ATP-binding cassette (ABC) transporter. Expressed in the vascular tissue of primary stem. The mRNA is cell-to-cell mobile.                                                                                                                                                                                                                                                                                                                                                                                                                                                                                                | 101.26 | 235.19  | 0.43 | 3.76E-05 | 1.93E-04 |
| 5885 | 7 | F2-3 vs. S2-3 | 260932_s_a<br>t | AT1G02520 | extensin-like protein (ELP)                                                                                                                                                                                                                                                                                                                                                                                                                                                                                                                                                                                                          | 9.69   | 22.93   | 0.42 | 2.31E-05 | 1.35E-04 |
| 5886 | 7 | F2-3 vs. S2-3 | 264371_at       | AT1G12090 | member of Glycosyltransferase Family- 37. FUT8 was previously associated to AT1G14110                                                                                                                                                                                                                                                                                                                                                                                                                                                                                                                                                | 237.01 | 558.5   | 0.42 | 7.71E-04 | 1.85E-03 |
| 5887 | 7 | F2-3 vs. S2-3 | 262651_at       | AT1G14100 | Encodes SR45, a member of the highly conserved family of serine/arginine-rich (SR) proteins, which play key roles in pre-mRNA splicing and other aspects of RNA metabolism. SR45 is a spliceosome protein, interacts with SR33 and the U1-70K protein of the U1 snRNP. Also involved in plant sugar response. sr45-1 mutation confers hypersensitivity to glucose during early seedling growth. PATLs belong to a family of proteins having a Golgi dynamics (GOLD) domain in tandem with the Sec14p-like domain. PATLs are auxin regulated. Quadruple mutants (pat12456) show altered PIN1 lateralization in root endodermis cells. | 12.28  | 29.28   | 0.42 | 5.79E-05 | 2.63E-04 |
| 5888 | 7 | F2-3 vs. S2-3 | 246324_at       | AT1G16610 |                                                                                                                                                                                                                                                                                                                                                                                                                                                                                                                                                                                                                                      | 89.51  | 211.68  | 0.42 | 1.16E-05 | 8.35E-05 |
| 5889 | 7 | F2-3 vs. S2-3 | 261926_at       | AT1G22530 |                                                                                                                                                                                                                                                                                                                                                                                                                                                                                                                                                                                                                                      | 56.54  | 135.28  | 0.42 | 5.90E-06 | 5.12E-05 |



|      |   |               |           |           |                                                                                                                                                                                                                                                                                                                                                                                                                                                                                                                                                                               |        |         |      |          |          |
|------|---|---------------|-----------|-----------|-------------------------------------------------------------------------------------------------------------------------------------------------------------------------------------------------------------------------------------------------------------------------------------------------------------------------------------------------------------------------------------------------------------------------------------------------------------------------------------------------------------------------------------------------------------------------------|--------|---------|------|----------|----------|
| 5890 | 7 | F2-3 vs. S2-3 | 259592_at | AT1G27950 | Encodes LTPG1, a lipid transfer protein with a predicted GPI (glycosylphosphatidylinositol)-anchor domain. Localized in the plasma membrane. Disruption of the LTPG1 gene causes alterations of cuticular lipid composition, but no significant changes on total wax and cutin monomer loads are seen. The mRNA is cell-to-cell mobile.                                                                                                                                                                                                                                       | 43.01  | 101.92  | 0.42 | 6.24E-05 | 2.76E-04 |
| 5891 | 7 | F2-3 vs. S2-3 | 256536_at | AT1G33330 | Class I peptide chain release factor;(source:Araport11)                                                                                                                                                                                                                                                                                                                                                                                                                                                                                                                       | 69.81  | 165.89  | 0.42 | 5.17E-04 | 1.36E-03 |
| 5892 | 7 | F2-3 vs. S2-3 | 259942_at | AT1G71260 | Encodes WHY2, a homolog of the potato p24 protein. It shares the conserved KGKAAL domain, a putative DNA-binding domain, with potato p24 and is localized to mitochondria and not the nucleus. WHY2 is a member of the Whirly family proteins present mainly in the plant kingdom performing various activities related to DNA metabolism. Crystal structure of Solanum tuberosum WHY2, a close homolog of Arabidopsis WHY2, reveal that Whirly proteins bind to single strand DNA to promote accurate repair of DNA double-strand breaks over an error-prone repair pathway. | 18.22  | 43.06   | 0.42 | 2.07E-04 | 6.77E-04 |
| 5893 | 7 | F2-3 vs. S2-3 | 259710_at | AT1G77670 | Pyridoxal phosphate (PLP)-dependent transferases superfamily protein;(source:Araport11)                                                                                                                                                                                                                                                                                                                                                                                                                                                                                       | 83.28  | 199.76  | 0.42 | 2.51E-04 | 7.75E-04 |
| 5894 | 7 | F2-3 vs. S2-3 | 262206_at | AT2G01090 | Ubiquinol-cytochrome C reductase hinge protein;(source:Araport11)                                                                                                                                                                                                                                                                                                                                                                                                                                                                                                             | 800.04 | 1887.53 | 0.42 | 1.15E-05 | 8.34E-05 |
| 5895 | 7 | F2-3 vs. S2-3 | 263017_at | AT2G17620 | Cyclin B2;(source:Araport11)                                                                                                                                                                                                                                                                                                                                                                                                                                                                                                                                                  | 63.82  | 152.82  | 0.42 | 1.59E-05 | 1.03E-04 |
| 5896 | 7 | F2-3 vs. S2-3 | 267088_at | AT2G38140 | plastid-specific ribosomal protein 4 (PSRP4) mRNA, complete The mRNA is cell-to-cell mobile.                                                                                                                                                                                                                                                                                                                                                                                                                                                                                  | 25.27  | 60.55   | 0.42 | 2.43E-04 | 7.58E-04 |
| 5897 | 7 | F2-3 vs. S2-3 | 265451_at | AT2G46490 | hypothetical protein;(source:Araport11)                                                                                                                                                                                                                                                                                                                                                                                                                                                                                                                                       | 65.69  | 157.42  | 0.42 | 1.40E-05 | 9.48E-05 |
| 5898 | 7 | F2-3 vs. S2-3 | 266715_at | AT2G46780 | RNA-binding (RRM/RBD/RNP motifs) family protein;(source:Araport11)                                                                                                                                                                                                                                                                                                                                                                                                                                                                                                            | 14.19  | 33.52   | 0.42 | 2.74E-04 | 8.31E-04 |
| 5899 | 7 | F2-3 vs. S2-3 | 259181_at | AT3G01690 | alpha/beta-Hydrolases superfamily protein;(source:Araport11)                                                                                                                                                                                                                                                                                                                                                                                                                                                                                                                  | 136.34 | 327.18  | 0.42 | 4.12E-05 | 2.07E-04 |
| 5900 | 7 | F2-3 vs. S2-3 | 258486_at | AT3G02560 | Ribosomal protein S7e family protein;(source:Araport11)<br>encodes a homolog of human ERCC1 protein (yeast RAD10), which is a DNA repair endonuclease. Mutants are sensitive to UV-B and gamma radiation (G2 cell cycle phase arrest) and are defective in dark-repair of pyrimidine pyrimidone dimers. This protein incises the 5 Prime end of damaged DNA, similar to ERCC1/RAD10.                                                                                                                                                                                          | 458.65 | 1086.32 | 0.42 | 3.83E-05 | 1.95E-04 |
| 5901 | 7 | F2-3 vs. S2-3 | 259304_at | AT3G05210 | TOPLESS-related 2;(source:Araport11)                                                                                                                                                                                                                                                                                                                                                                                                                                                                                                                                          | 40.92  | 97.12   | 0.42 | 3.87E-04 | 1.09E-03 |
| 5902 | 7 | F2-3 vs. S2-3 | 257553_at | AT3G16830 | Kinesin motor family protein;(source:Araport11)                                                                                                                                                                                                                                                                                                                                                                                                                                                                                                                               | 193.51 | 461.53  | 0.42 | 2.73E-04 | 8.30E-04 |
| 5903 | 7 | F2-3 vs. S2-3 | 257115_at | AT3G20150 | Tetratricopeptide repeat (TPR)-like superfamily protein;(source:Araport11)                                                                                                                                                                                                                                                                                                                                                                                                                                                                                                    | 10.36  | 24.64   | 0.42 | 6.20E-06 | 5.30E-05 |
| 5904 | 7 | F2-3 vs. S2-3 | 252148_at | AT3G51280 | Encodes a cytoplasmic ribosomal protein S13 homologue involved in early leaf development The mRNA is cell-to-cell mobile.                                                                                                                                                                                                                                                                                                                                                                                                                                                     | 42.14  | 100.21  | 0.42 | 5.93E-04 | 1.51E-03 |
| 5905 | 7 | F2-3 vs. S2-3 | 255706_at | AT4G00100 | magnesium transporter, putative (DUF803);(source:Araport11)                                                                                                                                                                                                                                                                                                                                                                                                                                                                                                                   | 312.89 | 742     | 0.42 | 6.07E-05 | 2.71E-04 |
| 5906 | 7 | F2-3 vs. S2-3 | 255043_at | AT4G09640 | S-adenosyl-L-methionine-dependent methyltransferases superfamily protein;(source:Araport11)                                                                                                                                                                                                                                                                                                                                                                                                                                                                                   | 29.77  | 71.08   | 0.42 | 3.01E-04 | 8.96E-04 |
| 5907 | 7 | F2-3 vs. S2-3 | 245274_at | AT4G14360 | RNA binding protein;(source:Araport11)                                                                                                                                                                                                                                                                                                                                                                                                                                                                                                                                        | 48.23  | 114.48  | 0.42 | 2.93E-05 | 1.59E-04 |
| 5908 | 7 | F2-3 vs. S2-3 | 245512_at | AT4G15770 | Encodes casein kinase II beta (regulatory) subunit.                                                                                                                                                                                                                                                                                                                                                                                                                                                                                                                           | 105.27 | 251.83  | 0.42 | 4.40E-04 | 1.20E-03 |
| 5909 | 7 | F2-3 vs. S2-3 | 245351_at | AT4G17640 | Encodes a kinesin-like motor protein heavy chain. Loss of function mutations have reduced fertility and are defective in spindle formation in male meiosis.                                                                                                                                                                                                                                                                                                                                                                                                                   | 124.54 | 294.38  | 0.42 | 2.50E-04 | 7.74E-04 |
| 5910 | 7 | F2-3 vs. S2-3 | 254400_at | AT4G21270 | ATP-dependent RNA helicase;(source:Araport11)                                                                                                                                                                                                                                                                                                                                                                                                                                                                                                                                 | 20.74  | 48.97   | 0.42 | 2.61E-04 | 8.01E-04 |
| 5911 | 7 | F2-3 vs. S2-3 | 253670_at | AT4G30010 | Ribosomal protein S14p/S29e family protein;(source:Araport11)                                                                                                                                                                                                                                                                                                                                                                                                                                                                                                                 | 185.65 | 437.44  | 0.42 | 4.32E-05 | 2.13E-04 |
| 5912 | 7 | F2-3 vs. S2-3 | 253291_at | AT4G33865 | Ribosomal protein S24e family protein;(source:Araport11)                                                                                                                                                                                                                                                                                                                                                                                                                                                                                                                      | 356.12 | 847.61  | 0.42 | 1.63E-04 | 5.66E-04 |
| 5913 | 7 | F2-3 vs. S2-3 | 250969_at | AT5G02740 | maternal effect embryo arrest 60;(source:Araport11)                                                                                                                                                                                                                                                                                                                                                                                                                                                                                                                           | 114.47 | 274.8   | 0.42 | 2.61E-05 | 1.47E-04 |
| 5914 | 7 | F2-3 vs. S2-3 | 250707_at | AT5G05950 | hypothetical protein;(source:Araport11)                                                                                                                                                                                                                                                                                                                                                                                                                                                                                                                                       | 18.85  | 44.84   | 0.42 | 5.92E-04 | 1.51E-03 |
| 5915 | 7 | F2-3 vs. S2-3 | 250681_at | AT5G06590 | Calcium-dependent lipid-binding (CaLB domain) plant phosphoribosyltransferase family protein;(source:Araport11)                                                                                                                                                                                                                                                                                                                                                                                                                                                               | 27.97  | 66.6    | 0.42 | 1.20E-04 | 4.46E-04 |
| 5916 | 7 | F2-3 vs. S2-3 | 250269_at | AT5G12970 | Encodes a putative ribosomal protein S11 (RPS11-beta).                                                                                                                                                                                                                                                                                                                                                                                                                                                                                                                        | 41.16  | 97.93   | 0.42 | 2.50E-05 | 1.43E-04 |
| 5917 | 7 | F2-3 vs. S2-3 | 249795_at | AT5G23740 | EGR2 functions as a negative regulator of plant growth with prominent effect on plant growth during drought stress. EGR2 regulates microtubule organization and likely affects additional cytoskeleton and trafficking processes along the plasma membrane.                                                                                                                                                                                                                                                                                                                   | 73.33  | 174.66  | 0.42 | 1.08E-04 | 4.14E-04 |
| 5918 | 7 | F2-3 vs. S2-3 | 246756_at | AT5G27930 |                                                                                                                                                                                                                                                                                                                                                                                                                                                                                                                                                                               | 18.05  | 43.02   | 0.42 | 2.94E-04 | 8.81E-04 |

|      |   |               |           |           |                                                                                                                                                                                                                                                                                                                                                                                                                                                                                                                                                                                                                                           |         |         |      |          |          |
|------|---|---------------|-----------|-----------|-------------------------------------------------------------------------------------------------------------------------------------------------------------------------------------------------------------------------------------------------------------------------------------------------------------------------------------------------------------------------------------------------------------------------------------------------------------------------------------------------------------------------------------------------------------------------------------------------------------------------------------------|---------|---------|------|----------|----------|
| 5919 | 7 | F2-3 vs. S2-3 | 249115_at | AT5G43810 | Encodes Argonaute10, a member of the EIF2C (elongation initiation factor 2c)/ Argonaute class of proteins. Required to establish the central-peripheral organization of the embryo apex. Along with WUS and CLV genes, controls the relative organization of central zone and peripheral zone cells in meristems. Acts in embryonic provascular tissue potentiating WUSCHEL function during meristem development in the embryo. AGO10 specifically sequesters miR166/165 to regulate shoot apical meristem development.                                                                                                                   | 82.87   | 197     | 0.42 | 2.15E-04 | 6.94E-04 |
| 5920 | 7 | F2-3 vs. S2-3 | 247175_at | AT5G65280 | Encodes a protein with reported similarity to GCR2 a putative G protein coupled receptor thought to be an ABA receptor. Loss of function mutations in GCL1 show no ABA response defects based on assays of seed germination and seedling development. GCL1 also has similarity to LANCL1 and LANCL2, human homologs of bacterial lanthionine synthetase.                                                                                                                                                                                                                                                                                  | 582.43  | 1397.34 | 0.42 | 6.53E-05 | 2.84E-04 |
| 5921 | 7 | F2-3 vs. S2-3 | 244986_at | ATCG00820 | Encodes a 6.8-kDa protein of the small ribosomal subunit. Encodes mitochondrial-localized chaperonin 10 that complements the E.coli groES mutant. Its mRNA is upregulated in response to heat shock treatment and is expressed uniformly in various organs.                                                                                                                                                                                                                                                                                                                                                                               | 548.16  | 1292.8  | 0.42 | 1.37E-04 | 4.93E-04 |
| 5922 | 7 | F2-3 vs. S2-3 | 260714_at | AT1G14980 | Encodes a transcriptional co-regulator of AGAMOUS, that functions with LEUNIG to repress AG in the outer floral whorls.                                                                                                                                                                                                                                                                                                                                                                                                                                                                                                                   | 28.66   | 69.79   | 0.41 | 1.89E-04 | 6.33E-04 |
| 5923 | 7 | F2-3 vs. S2-3 | 260862_at | AT1G43850 | Encodes AtNEK1, a member of the NIMA-related serine/threonine kinases (Neks) that have been linked to cell-cycle regulation in fungi and mammals. Plant Neks might be involved in plant development processes.                                                                                                                                                                                                                                                                                                                                                                                                                            | 30.19   | 72.99   | 0.41 | 7.54E-04 | 1.81E-03 |
| 5924 | 7 | F2-3 vs. S2-3 | 263004_at | AT1G54510 | ER membrane protein complex subunit-like protein;(source:Arapt11)                                                                                                                                                                                                                                                                                                                                                                                                                                                                                                                                                                         | 25.16   | 61.68   | 0.41 | 5.29E-05 | 2.47E-04 |
| 5925 | 7 | F2-3 vs. S2-3 | 264159_at | AT1G65270 | Ribosomal protein L22p/L17e family protein;(source:Arapt11)                                                                                                                                                                                                                                                                                                                                                                                                                                                                                                                                                                               | 104.04  | 254.02  | 0.41 | 3.66E-05 | 1.89E-04 |
| 5926 | 7 | F2-3 vs. S2-3 | 264233_at | AT1G67430 | phosphatidylinositol synthase 1                                                                                                                                                                                                                                                                                                                                                                                                                                                                                                                                                                                                           | 1787.59 | 4326.09 | 0.41 | 4.60E-06 | 4.33E-05 |
| 5927 | 7 | F2-3 vs. S2-3 | 260006_at | AT1G68000 | Adenine nucleotide alpha hydrolases-like superfamily protein;(source:Arapt11)                                                                                                                                                                                                                                                                                                                                                                                                                                                                                                                                                             | 23.6    | 57.09   | 0.41 | 2.80E-05 | 1.54E-04 |
| 5928 | 7 | F2-3 vs. S2-3 | 259371_at | AT1G69080 |                                                                                                                                                                                                                                                                                                                                                                                                                                                                                                                                                                                                                                           | 16.32   | 39.38   | 0.41 | 1.23E-05 | 8.61E-05 |
| 5929 | 7 | F2-3 vs. S2-3 | 266348_at | AT2G01450 | MPK17 Map kinase family member. Mutants have increased numbers of peroxisomes a phenotype that can be suppressed by mutations in PMD1. This and other treatments, suggests a function in control of peroxisome proliferation in salt stress. Encodes a protein belonging to the subgroup of HMGB (high mobility group B) proteins that have a distinctive DNA-binding motif, the HMG-box domain. The motif confers non-sequence specific interaction with linear DNA and structure-specific binding to distorted DNA sites. The HMGB proteins are involved in the assembly of nucleoprotein complexes. Can be phosphorylated by CK2alpha. | 112.9   | 274.18  | 0.41 | 1.16E-05 | 8.35E-05 |
| 5930 | 7 | F2-3 vs. S2-3 | 263074_at | AT2G17560 | encodes a novel G-alpha protein that shares similarity to plant, yeast, and animal G-alpha proteins at the C-terminus. It contains an N-terminus that is as large as the C-terminus, is a member of a small family, and is expressed in all tissues examined, including roots, leaves, stems, flowers, and fruits.                                                                                                                                                                                                                                                                                                                        | 127.53  | 313.3   | 0.41 | 1.06E-05 | 7.84E-05 |
| 5931 | 7 | F2-3 vs. S2-3 | 267136_at | AT2G23460 | transmembrane protein;(source:Arapt11)                                                                                                                                                                                                                                                                                                                                                                                                                                                                                                                                                                                                    | 100.6   | 242.76  | 0.41 | 3.19E-04 | 9.39E-04 |
| 5932 | 7 | F2-3 vs. S2-3 | 263640_at | AT2G25270 | RPL24A encodes ribosomal protein L24, homolog of cytosolic RPL24, found in archaea and higher eukaryotes. Arabidopsis has two RPL24 homologs, RPL24A (AT2G36620) and RPL24B (AT3G53020).                                                                                                                                                                                                                                                                                                                                                                                                                                                  | 34.39   | 83.53   | 0.41 | 4.44E-05 | 2.17E-04 |
| 5933 | 7 | F2-3 vs. S2-3 | 265210_at | AT2G36620 | hypothetical protein;(source:Arapt11)                                                                                                                                                                                                                                                                                                                                                                                                                                                                                                                                                                                                     | 301.95  | 742.84  | 0.41 | 2.14E-05 | 1.27E-04 |
| 5934 | 7 | F2-3 vs. S2-3 | 259062_at | AT3G07440 | The gene encodes a putative leucine-rich repeat (LRR) Receptor-like kinase (RLK).                                                                                                                                                                                                                                                                                                                                                                                                                                                                                                                                                         | 14.45   | 34.92   | 0.41 | 4.87E-04 | 1.29E-03 |
| 5935 | 7 | F2-3 vs. S2-3 | 257753_at | AT3G18740 | Heavy metal transport/detoxification superfamily protein;(source:Arapt11)                                                                                                                                                                                                                                                                                                                                                                                                                                                                                                                                                                 | 2370.97 | 5806.46 | 0.41 | 5.30E-06 | 4.80E-05 |
| 5936 | 7 | F2-3 vs. S2-3 | 256621_at | AT3G24450 | member of eIF3c - eukaryotic initiation factor 3c                                                                                                                                                                                                                                                                                                                                                                                                                                                                                                                                                                                         | 58.31   | 143.23  | 0.41 | 3.26E-05 | 1.73E-04 |
| 5937 | 7 | F2-3 vs. S2-3 | 251738_at | AT3G56150 | Ribosomal protein L7Ae/L30e/S12e/Gadd45 family protein;(source:Arapt11)                                                                                                                                                                                                                                                                                                                                                                                                                                                                                                                                                                   | 60.34   | 146.45  | 0.41 | 1.63E-04 | 5.66E-04 |
| 5938 | 7 | F2-3 vs. S2-3 | 251185_at | AT3G62870 | Encodes NRGA1, a putative mitochondrial pyruvate carrier that mediates ABA regulation of guard cell ion channels and drought stress responses.                                                                                                                                                                                                                                                                                                                                                                                                                                                                                            | 724.12  | 1770.47 | 0.41 | 4.77E-04 | 1.27E-03 |
| 5939 | 7 | F2-3 vs. S2-3 | 255243_at | AT4G05590 | Putative methyltransferase family protein;(source:Arapt11)                                                                                                                                                                                                                                                                                                                                                                                                                                                                                                                                                                                | 25.42   | 62.45   | 0.41 | 4.22E-04 | 1.16E-03 |
| 5940 | 7 | F2-3 vs. S2-3 | 245316_at | AT4G14000 | transmembrane protein;(source:Arapt11)                                                                                                                                                                                                                                                                                                                                                                                                                                                                                                                                                                                                    | 165.57  | 399.71  | 0.41 | 7.40E-06 | 6.07E-05 |
| 5941 | 7 | F2-3 vs. S2-3 | 253243_at | AT4G34560 | Encodes GF14 epsilon chain, a 14-3-3 gene family member.                                                                                                                                                                                                                                                                                                                                                                                                                                                                                                                                                                                  | 12.5    | 30.46   | 0.41 | 4.36E-04 | 1.19E-03 |
| 5942 | 7 | F2-3 vs. S2-3 | 246489_at | AT5G16050 |                                                                                                                                                                                                                                                                                                                                                                                                                                                                                                                                                                                                                                           | 286.8   | 701.91  | 0.41 | 4.01E-04 | 1.11E-03 |
| 5943 | 7 | F2-3 vs. S2-3 | 249788_at | AT5G24330 | Encodes a SET-domain protein, a H3K27 monomethyltransferases required for chromatin structure and gene silencing. Regulates heterochromatic DNA replication. Contains a PCNA-binding domain. ATXR6 accumulates preferentially during the late G1 or S phase, suggesting that it plays a role in cell-cycle regulation or progression.                                                                                                                                                                                                                                                                                                     | 24.3    | 59.35   | 0.41 | 3.52E-04 | 1.01E-03 |

|      |   |               |           |           |                                                                                                                                                                                                                                                                                                                                                                                                                                                                                                                                                                                                                                                                                                                                                                                                                                                                                                                                                                                                                       |        |         |      |          |          |
|------|---|---------------|-----------|-----------|-----------------------------------------------------------------------------------------------------------------------------------------------------------------------------------------------------------------------------------------------------------------------------------------------------------------------------------------------------------------------------------------------------------------------------------------------------------------------------------------------------------------------------------------------------------------------------------------------------------------------------------------------------------------------------------------------------------------------------------------------------------------------------------------------------------------------------------------------------------------------------------------------------------------------------------------------------------------------------------------------------------------------|--------|---------|------|----------|----------|
| 5944 | 7 | F2-3 vs. S2-3 | 245861_at | AT5G28300 | Encodes a Ca(2+)-dependent CaM-binding protein. AtGT2L specifically targets the nucleus and possesses both transcriptional activation and DNA-binding abilities, implicating its function as a nuclear transcription factor.                                                                                                                                                                                                                                                                                                                                                                                                                                                                                                                                                                                                                                                                                                                                                                                          | 12.6   | 31.02   | 0.41 | 2.09E-05 | 1.25E-04 |
| 5945 | 7 | F2-3 vs. S2-3 | 248512_at | AT5G50460 | secE/sec61-gamma protein transport protein;(source:Araport11)                                                                                                                                                                                                                                                                                                                                                                                                                                                                                                                                                                                                                                                                                                                                                                                                                                                                                                                                                         | 120.16 | 294.03  | 0.41 | 1.73E-05 | 1.09E-04 |
| 5946 | 7 | F2-3 vs. S2-3 | 248471_at | AT5G50840 | alpha-taxilin-like protein;(source:Araport11)<br>Mutant has defective roots. Essential for giant cell ontogenesis. Role in organizing the mitotic microtubule array during both early and late mitosis in all plant organs.                                                                                                                                                                                                                                                                                                                                                                                                                                                                                                                                                                                                                                                                                                                                                                                           | 12.36  | 30.26   | 0.41 | 4.59E-04 | 1.24E-03 |
| 5947 | 7 | F2-3 vs. S2-3 | 248413_at | AT5G51600 | Ribosomal protein S30 family protein;(source:Araport11)                                                                                                                                                                                                                                                                                                                                                                                                                                                                                                                                                                                                                                                                                                                                                                                                                                                                                                                                                               | 36.95  | 91.2    | 0.41 | 5.01E-04 | 1.33E-03 |
| 5948 | 7 | F2-3 vs. S2-3 | 247968_at | AT5G56670 | hypothetical protein;(source:Araport11)                                                                                                                                                                                                                                                                                                                                                                                                                                                                                                                                                                                                                                                                                                                                                                                                                                                                                                                                                                               | 386.3  | 949.63  | 0.41 | 1.76E-04 | 5.99E-04 |
| 5949 | 7 | F2-3 vs. S2-3 | 247667_at | AT5G60150 | Fatty acid hydroxylase superfamily;(source:Araport11)                                                                                                                                                                                                                                                                                                                                                                                                                                                                                                                                                                                                                                                                                                                                                                                                                                                                                                                                                                 | 88.21  | 212.97  | 0.41 | 1.33E-04 | 4.83E-04 |
| 5950 | 7 | F2-3 vs. S2-3 | 264180_at | AT1G02190 | Encodes a protein with putative sucrose-phosphate synthase activity.                                                                                                                                                                                                                                                                                                                                                                                                                                                                                                                                                                                                                                                                                                                                                                                                                                                                                                                                                  | 69.88  | 173.3   | 0.4  | 3.37E-04 | 9.77E-04 |
| 5951 | 7 | F2-3 vs. S2-3 | 261169_at | AT1G04920 | Ribosomal protein L35Ae family protein;(source:Araport11)                                                                                                                                                                                                                                                                                                                                                                                                                                                                                                                                                                                                                                                                                                                                                                                                                                                                                                                                                             | 40.74  | 101.5   | 0.4  | 5.42E-04 | 1.41E-03 |
| 5952 | 7 | F2-3 vs. S2-3 | 256065_at | AT1G07070 | Encodes a homolog of the yeast and human BUB3 (BUDDING UNINHIBITED BY BENZYMIDAZOL 3) protein. Yeast and human BUB3s function in spindle assembly checkpoint control.                                                                                                                                                                                                                                                                                                                                                                                                                                                                                                                                                                                                                                                                                                                                                                                                                                                 | 60.55  | 151.58  | 0.4  | 8.88E-05 | 3.58E-04 |
| 5953 | 7 | F2-3 vs. S2-3 | 245814_at | AT1G49910 | CAP-gly domain linker;(source:Araport11)                                                                                                                                                                                                                                                                                                                                                                                                                                                                                                                                                                                                                                                                                                                                                                                                                                                                                                                                                                              | 19.73  | 49.77   | 0.4  | 2.36E-04 | 7.43E-04 |
| 5954 | 7 | F2-3 vs. S2-3 | 264763_at | AT1G61450 | hypothetical protein;(source:Araport11)                                                                                                                                                                                                                                                                                                                                                                                                                                                                                                                                                                                                                                                                                                                                                                                                                                                                                                                                                                               | 12.21  | 30.59   | 0.4  | 7.10E-06 | 5.88E-05 |
| 5955 | 7 | F2-3 vs. S2-3 | 262313_at | AT1G70900 | Cytosolic ribosomal 60S subunit protein.                                                                                                                                                                                                                                                                                                                                                                                                                                                                                                                                                                                                                                                                                                                                                                                                                                                                                                                                                                              | 80.89  | 200.63  | 0.4  | 7.22E-04 | 1.75E-03 |
| 5956 | 7 | F2-3 vs. S2-3 | 261911_at | AT1G80750 | encodes an alpha form of a protein similar to the cold acclimation protein WCOR413 in wheat. Expression is induced by short-term cold-treatment, water deprivation, and abscisic acid treatment. The mRNA is cell-to-cell mobile.                                                                                                                                                                                                                                                                                                                                                                                                                                                                                                                                                                                                                                                                                                                                                                                     | 169.76 | 421.24  | 0.4  | 2.23E-05 | 1.31E-04 |
| 5957 | 7 | F2-3 vs. S2-3 | 265480_at | AT2G15970 | zinc finger (CCCH-type) family protein / D111/G-patch domain-containing protein;(source:Araport11)                                                                                                                                                                                                                                                                                                                                                                                                                                                                                                                                                                                                                                                                                                                                                                                                                                                                                                                    | 209.62 | 519.34  | 0.4  | 4.30E-06 | 4.17E-05 |
| 5958 | 7 | F2-3 vs. S2-3 | 263526_at | AT2G24830 | Encodes an Arabidopsis response regulator (ARR) protein that acts in concert with other type-B ARRs in the cytokinin signaling pathway. Also involved in cytokinin-dependent inhibition of hypocotyl elongation and cytokinin-dependent greening and shooting in tissue culture. ARR1, ARR10, and ARR12 are redundant regulators of drought response, with ARR1 being the most critical. The retention of leaf water content, maintenance of cell membrane stability, and enhancement of anthocyanin biosynthesis were found to contribute to the enhanced drought tolerance of the arr1,10,12 triple mutant. ARR1, ARR10 and ARR12 redundantly bind to the promoter of WUSCHEL (WUS), directly activate its transcription. In parallel, ARR1, ARR10 and ARR12 repress the expression of YUCCAs (YUCs), which encode a key enzyme for auxin biosynthesis, indirectly promoting WUS induction. The regulation of ARR1, ARR10 and ARR12 on WUS and YUCs is required for regeneration and maintenance of shoot meristem. | 46.58  | 116.04  | 0.4  | 1.47E-04 | 5.23E-04 |
| 5959 | 7 | F2-3 vs. S2-3 | 264374_at | AT2G25180 | hydroxyproline-rich glycoprotein family protein;(source:Araport11)                                                                                                                                                                                                                                                                                                                                                                                                                                                                                                                                                                                                                                                                                                                                                                                                                                                                                                                                                    | 20.8   | 51.45   | 0.4  | 4.93E-05 | 2.34E-04 |
| 5960 | 7 | F2-3 vs. S2-3 | 267431_at | AT2G34870 | transmembrane protein;(source:Araport11)                                                                                                                                                                                                                                                                                                                                                                                                                                                                                                                                                                                                                                                                                                                                                                                                                                                                                                                                                                              | 13.08  | 32.76   | 0.4  | 1.58E-05 | 1.03E-04 |
| 5961 | 7 | F2-3 vs. S2-3 | 265798_at | AT2G35790 | Disease resistance-responsive (dirigent-like protein) family protein;(source:Araport11)                                                                                                                                                                                                                                                                                                                                                                                                                                                                                                                                                                                                                                                                                                                                                                                                                                                                                                                               | 84.23  | 210.05  | 0.4  | 2.69E-05 | 1.50E-04 |
| 5962 | 7 | F2-3 vs. S2-3 | 257570_at | AT3G13662 | hydroxyproline-rich glycoprotein family protein, similar to Mrs16p (Gl:2737884) (Saccharomyces cerevisiae); weak similarity to ataxin-2 related protein (Gl:1679686) (Homo sapiens). Included in a family of CTC interacting domain proteins found to interact with PAB2.                                                                                                                                                                                                                                                                                                                                                                                                                                                                                                                                                                                                                                                                                                                                             | 22.69  | 57.14   | 0.4  | 1.35E-05 | 9.22E-05 |
| 5963 | 7 | F2-3 vs. S2-3 | 258206_at | AT3G14010 | Delta tonoplast intrinsic protein, functions as a water channel and ammonium (NH3) transporter. Highly expressed in flower, shoot, and stem. Expression shows diurnal regulation and is induced by ammonium (NH3). Protein localized to vacuolar membrane. The mRNA is cell-to-cell mobile.                                                                                                                                                                                                                                                                                                                                                                                                                                                                                                                                                                                                                                                                                                                           | 25.25  | 62.6    | 0.4  | 5.33E-04 | 1.39E-03 |
| 5964 | 7 | F2-3 vs. S2-3 | 258054_at | AT3G16240 | E3 UFM1-protein ligase-like protein;(source:Araport11)                                                                                                                                                                                                                                                                                                                                                                                                                                                                                                                                                                                                                                                                                                                                                                                                                                                                                                                                                                | 236.55 | 595.31  | 0.4  | 7.77E-04 | 1.86E-03 |
| 5965 | 7 | F2-3 vs. S2-3 | 252513_at | AT3G46220 | Encodes a protein that has adenylylsulfate sulfohydrolase activity (E.C. 3.6.2.1) in vitro.                                                                                                                                                                                                                                                                                                                                                                                                                                                                                                                                                                                                                                                                                                                                                                                                                                                                                                                           | 71.61  | 176.97  | 0.4  | 6.79E-04 | 1.68E-03 |
| 5966 | 7 | F2-3 vs. S2-3 | 251707_at | AT3G56490 | VQ motif-containing protein;(source:Araport11)                                                                                                                                                                                                                                                                                                                                                                                                                                                                                                                                                                                                                                                                                                                                                                                                                                                                                                                                                                        | 420.44 | 1063.56 | 0.4  | 2.77E-04 | 8.40E-04 |
| 5967 | 7 | F2-3 vs. S2-3 | 246289_at | AT3G56880 | N-acetylglucosaminyl transferase component family protein / Gpi1 family protein;(source:Araport11)                                                                                                                                                                                                                                                                                                                                                                                                                                                                                                                                                                                                                                                                                                                                                                                                                                                                                                                    | 97.96  | 246.12  | 0.4  | 9.40E-06 | 7.23E-05 |
| 5968 | 7 | F2-3 vs. S2-3 | 251656_at | AT3G57170 | encodes a ribosomal protein S18C, a constituent of the small subunit of the ribosomal complex                                                                                                                                                                                                                                                                                                                                                                                                                                                                                                                                                                                                                                                                                                                                                                                                                                                                                                                         | 19.78  | 50.01   | 0.4  | 2.10E-04 | 6.85E-04 |
| 5969 | 7 | F2-3 vs. S2-3 | 255000_at | AT4G09800 |                                                                                                                                                                                                                                                                                                                                                                                                                                                                                                                                                                                                                                                                                                                                                                                                                                                                                                                                                                                                                       | 820.46 | 2042.56 | 0.4  | 5.30E-06 | 4.80E-05 |

|      |   |               |            |           |                                                                                                                                                                                                                                                                                                                                                                                                                                                                                                                                                                                                                                                                                                                               |        |         |      |          |          |
|------|---|---------------|------------|-----------|-------------------------------------------------------------------------------------------------------------------------------------------------------------------------------------------------------------------------------------------------------------------------------------------------------------------------------------------------------------------------------------------------------------------------------------------------------------------------------------------------------------------------------------------------------------------------------------------------------------------------------------------------------------------------------------------------------------------------------|--------|---------|------|----------|----------|
| 5970 | 7 | F2-3 vs. S2-3 | 250974_at  | AT5G02820 | Involved in the patterning and shape of leaf trichomes. Encodes the DNA topoisomerase VI SPO11-3, involved in endoreduplication                                                                                                                                                                                                                                                                                                                                                                                                                                                                                                                                                                                               | 62.44  | 156.18  | 0.4  | 3.75E-04 | 1.06E-03 |
| 5971 | 7 | F2-3 vs. S2-3 | 249984_at  | AT5G18400 | Cytokine-induced anti-apoptosis inhibitor 1, Fe-S biogenesis;(source:Araport11)                                                                                                                                                                                                                                                                                                                                                                                                                                                                                                                                                                                                                                               | 205.42 | 508.06  | 0.4  | 1.43E-04 | 5.11E-04 |
| 5972 | 7 | F2-3 vs. S2-3 | 249832_at  | AT5G23400 | Leucine-rich repeat (LRR) family protein;(source:Araport11)                                                                                                                                                                                                                                                                                                                                                                                                                                                                                                                                                                                                                                                                   | 19.43  | 48.44   | 0.4  | 2.32E-04 | 7.34E-04 |
| 5973 | 7 | F2-3 vs. S2-3 | 249755_at  | AT5G24580 | Heavy metal transport/detoxification superfamily protein;(source:Araport11)                                                                                                                                                                                                                                                                                                                                                                                                                                                                                                                                                                                                                                                   | 29.81  | 75.35   | 0.4  | 4.30E-06 | 4.17E-05 |
| 5974 | 7 | F2-3 vs. S2-3 | 249456_at  | AT5G39410 | Saccharopine dehydrogenase;(source:Araport11)                                                                                                                                                                                                                                                                                                                                                                                                                                                                                                                                                                                                                                                                                 | 61.46  | 153.52  | 0.4  | 4.45E-04 | 1.21E-03 |
| 5975 | 7 | F2-3 vs. S2-3 | 248387_at  | AT5G51960 | complex 1 protein, LYR family protein;(source:Araport11)                                                                                                                                                                                                                                                                                                                                                                                                                                                                                                                                                                                                                                                                      | 50.32  | 124.75  | 0.4  | 6.00E-06 | 5.18E-05 |
| 5976 | 7 | F2-3 vs. S2-3 | 248349_at  | AT5G52240 | Encodes a protein with similarity to progesterone-binding proteins in animals. Has been shown to bind steroids in vitro. Expressed in aerial portions of the plant excluding mature flowers and siliques. Antisense experiments suggest a role in inhibition of hypocotyl cell elongation. Expression is suppressed light grown seedlings transferred to the dark. The mRNA is cell-to-cell mobile.                                                                                                                                                                                                                                                                                                                           | 244.4  | 612.95  | 0.4  | 6.50E-06 | 5.49E-05 |
| 5977 | 7 | F2-3 vs. S2-3 | 247935_at  | AT5G56940 | Ribosomal protein S16 family protein;(source:Araport11)                                                                                                                                                                                                                                                                                                                                                                                                                                                                                                                                                                                                                                                                       | 102.55 | 258.69  | 0.4  | 9.30E-06 | 7.18E-05 |
| 5978 | 7 | F2-3 vs. S2-3 | 247787_at  | AT5G58640 | Selenoprotein, Rdx type;(source:Araport11)                                                                                                                                                                                                                                                                                                                                                                                                                                                                                                                                                                                                                                                                                    | 85.59  | 215.14  | 0.4  | 3.32E-05 | 1.76E-04 |
| 5979 | 7 | F2-3 vs. S2-3 | 247652_at  | AT5G59910 | Histone superfamily protein;(source:Araport11)                                                                                                                                                                                                                                                                                                                                                                                                                                                                                                                                                                                                                                                                                | 381.8  | 959.44  | 0.4  | 9.44E-05 | 3.75E-04 |
| 5980 | 7 | F2-3 vs. S2-3 | 247148_at  | AT5G65670 | auxin (indole-3-acetic acid) induced gene The mRNA is cell-to-cell mobile. encodes a chloroplast ribosomal protein L32, a constituent of the large subunit of the ribosomal complex                                                                                                                                                                                                                                                                                                                                                                                                                                                                                                                                           | 497.08 | 1258.07 | 0.4  | 9.46E-05 | 3.75E-04 |
| 5981 | 7 | F2-3 vs. S2-3 | 244960_at  | ATCG01020 | Glutamine amidotransferase type 1 family protein;(source:Araport11)                                                                                                                                                                                                                                                                                                                                                                                                                                                                                                                                                                                                                                                           | 822.99 | 2077.38 | 0.4  | 5.70E-06 | 5.00E-05 |
| 5982 | 7 | F2-3 vs. S2-3 | 247864_s_a | AT1G25155 | AGO5. Required for antiviral RNA silencing. Confers resistance to Potato virus X.                                                                                                                                                                                                                                                                                                                                                                                                                                                                                                                                                                                                                                             | 116.79 | 302.87  | 0.39 | 1.31E-05 | 9.05E-05 |
| 5983 | 7 | F2-3 vs. S2-3 | 264066_at  | AT2G27880 | elongation factor family protein;(source:Araport11)                                                                                                                                                                                                                                                                                                                                                                                                                                                                                                                                                                                                                                                                           | 28.66  | 72.85   | 0.39 | 9.30E-06 | 7.18E-05 |
| 5984 | 7 | F2-3 vs. S2-3 | 266471_at  | AT2G31060 | hydroxyproline-rich glycoprotein family protein;(source:Araport11)                                                                                                                                                                                                                                                                                                                                                                                                                                                                                                                                                                                                                                                            | 61.52  | 158.9   | 0.39 | 1.16E-04 | 4.37E-04 |
| 5985 | 7 | F2-3 vs. S2-3 | 267062_at  | AT2G32600 | Encodes a nuclear localized member of the ribosomal L18ae/LX protein family. Loss of function mutations show reduced transmission through the gametophytes and embryo lethality.                                                                                                                                                                                                                                                                                                                                                                                                                                                                                                                                              | 40.33  | 102.2   | 0.39 | 4.62E-04 | 1.24E-03 |
| 5986 | 7 | F2-3 vs. S2-3 | 267007_at  | AT2G34480 | Integrase-type DNA-binding superfamily protein;(source:Araport11)                                                                                                                                                                                                                                                                                                                                                                                                                                                                                                                                                                                                                                                             | 557.32 | 1429.67 | 0.39 | 8.89E-05 | 3.59E-04 |
| 5987 | 7 | F2-3 vs. S2-3 | 260498_at  | AT2G41710 | zinc finger (CCCH type) helicase family protein;(source:Araport11)                                                                                                                                                                                                                                                                                                                                                                                                                                                                                                                                                                                                                                                            | 25.59  | 65      | 0.39 | 7.95E-05 | 3.30E-04 |
| 5988 | 7 | F2-3 vs. S2-3 | 266511_at  | AT2G47680 | Signal peptidase subunit;(source:Araport11)                                                                                                                                                                                                                                                                                                                                                                                                                                                                                                                                                                                                                                                                                   | 33.84  | 86.52   | 0.39 | 2.50E-06 | 2.85E-05 |
| 5989 | 7 | F2-3 vs. S2-3 | 259307_at  | AT3G05230 | KHZ1 is a CCCH zinc-finger and KH domain protein belonging to the VII subfamily. It is expressed throughout the plant. Highly similar to KHZ2. khz1 mutants are late flowering and double mutants with khz2 are even more late flowering. Overexpression leads to increased rates of leaf senescence.                                                                                                                                                                                                                                                                                                                                                                                                                         | 25.74  | 66.14   | 0.39 | 6.96E-05 | 2.98E-04 |
| 5990 | 7 | F2-3 vs. S2-3 | 256278_at  | AT3G12130 | transmembrane protein;(source:Araport11)                                                                                                                                                                                                                                                                                                                                                                                                                                                                                                                                                                                                                                                                                      | 27.25  | 69.09   | 0.39 | 2.32E-05 | 1.35E-04 |
| 5991 | 7 | F2-3 vs. S2-3 | 257134_at  | AT3G12870 | zinc knuckle (CCHC-type) family protein;(source:Araport11)                                                                                                                                                                                                                                                                                                                                                                                                                                                                                                                                                                                                                                                                    | 23.13  | 58.61   | 0.39 | 7.70E-06 | 6.20E-05 |
| 5992 | 7 | F2-3 vs. S2-3 | 246328_at  | AT3G43590 | Ribosomal protein S11 family protein;(source:Araport11)                                                                                                                                                                                                                                                                                                                                                                                                                                                                                                                                                                                                                                                                       | 43.36  | 112.35  | 0.39 | 8.09E-04 | 1.92E-03 |
| 5993 | 7 | F2-3 vs. S2-3 | 252055_at  | AT3G52580 | Enoyl-CoA reductase is involved in all very long chain fatty acids (VLCFA) elongation reactions that are required for cuticular wax, storage lipid and sphingolipid metabolism. The protein is located in the ER, but in contrast to its yeast homolog TSC13 is not particularly enriched in the nuclear envelope-vacuole junction. Mutants in this gene show abnormal organ morphology and stem glossiness. Cells in all tissues are only about 1/3 of the size of wild type cells. The morphological changes are most likely to result from the reduction in the VLCFA content of sphingolipids. Mutants also show abnormalities in the endocytic membrane organization and transport as well as reduced trichome papillae. | 798.22 | 2065.51 | 0.39 | 1.95E-05 | 1.19E-04 |
| 5994 | 7 | F2-3 vs. S2-3 | 251796_at  | AT3G55360 | Ribosomal protein L35Ae family protein;(source:Araport11)                                                                                                                                                                                                                                                                                                                                                                                                                                                                                                                                                                                                                                                                     | 99.17  | 254.5   | 0.39 | 2.59E-05 | 1.47E-04 |
| 5995 | 7 | F2-3 vs. S2-3 | 261362_s_a | AT3G55750 | Cleavage/polyadenylation specificity factor, 25kDa subunit;(source:Araport11)                                                                                                                                                                                                                                                                                                                                                                                                                                                                                                                                                                                                                                                 | 26.59  | 68.49   | 0.39 | 5.20E-06 | 4.73E-05 |
| 5996 | 7 | F2-3 vs. S2-3 | 245235_at  | AT4G25550 | Mitochondrial import inner membrane translocase subunit Tim17/Tim22/Tim23 family protein;(source:Araport11)                                                                                                                                                                                                                                                                                                                                                                                                                                                                                                                                                                                                                   | 126.74 | 326.22  | 0.39 | 3.20E-06 | 3.37E-05 |
| 5997 | 7 | F2-3 vs. S2-3 | 253981_at  | AT4G26670 | Encodes calcium-independent ABA-activated protein kinase, a member of SNF1-related protein kinases (SnRK2) whose activity is activated by ionic (salt) and non-ionic (mannitol) osmotic stress. Mutations disrupted ABA induction of stomatal closure as well as ABA inhibition of light-induced stomatal opening. However, regulation of stomatal opening/closing by light or CO(2) is not affected in these mutants. May act in the interval between ABA perception and reactive oxygen species production in the ABA signalling network.                                                                                                                                                                                   | 39.91  | 102.41  | 0.39 | 2.14E-05 | 1.27E-04 |
| 5998 | 7 | F2-3 vs. S2-3 | 253264_at  | AT4G33950 | transmembrane protein;(source:Araport11)                                                                                                                                                                                                                                                                                                                                                                                                                                                                                                                                                                                                                                                                                      | 58.76  | 151.79  | 0.39 | 8.08E-05 | 3.34E-04 |
| 5999 | 7 | F2-3 vs. S2-3 | 245893_at  | AT5G09270 | Histone superfamily protein;(source:Araport11)                                                                                                                                                                                                                                                                                                                                                                                                                                                                                                                                                                                                                                                                                | 14.93  | 38.64   | 0.39 | 3.32E-05 | 1.76E-04 |
| 6000 | 7 | F2-3 vs. S2-3 | 250397_at  | AT5G10980 |                                                                                                                                                                                                                                                                                                                                                                                                                                                                                                                                                                                                                                                                                                                               | 522.17 | 1339.73 | 0.39 | 1.65E-04 | 5.69E-04 |

|      |   |               |            |           |                                                                                                                                                                                                                                                                                                                                                                                                                                                                                                               |        |         |      |          |          |
|------|---|---------------|------------|-----------|---------------------------------------------------------------------------------------------------------------------------------------------------------------------------------------------------------------------------------------------------------------------------------------------------------------------------------------------------------------------------------------------------------------------------------------------------------------------------------------------------------------|--------|---------|------|----------|----------|
| 6001 | 7 | F2-3 vs. S2-3 | 250109_at  | AT5G15230 | Encodes gibberellin-regulated protein GASA4. Promotes GA responses and exhibits redox activity.                                                                                                                                                                                                                                                                                                                                                                                                               | 431.46 | 1115.44 | 0.39 | 1.13E-04 | 4.28E-04 |
| 6002 | 7 | F2-3 vs. S2-3 | 246978_at  | AT5G24910 | Member of CYP714A. Encodes one of the two tandemly duplicated gene pair ELA1 (CYP714A1) and ELA2 (CYP714A2), homologs of the rice cytochrome P450 monooxygenase gene EU11. Double mutation of ELA1 and ELA2 results in increased biomass and enlarged organs.                                                                                                                                                                                                                                                 | 56.53  | 145.69  | 0.39 | 6.44E-05 | 2.82E-04 |
| 6003 | 7 | F2-3 vs. S2-3 | 248990_at  | AT5G45210 | Disease resistance protein (TIR-NBS-LRR class) family;(source:Araport11)                                                                                                                                                                                                                                                                                                                                                                                                                                      | 10.17  | 25.76   | 0.39 | 5.35E-05 | 2.49E-04 |
| 6004 | 7 | F2-3 vs. S2-3 | 248958_at  | AT5G45590 | Ribosomal protein L35;(source:Araport11)                                                                                                                                                                                                                                                                                                                                                                                                                                                                      | 24.94  | 64.34   | 0.39 | 2.75E-05 | 1.53E-04 |
| 6005 | 7 | F2-3 vs. S2-3 | 248521_s_a | AT5G50520 | Major facilitator superfamily protein;(source:Araport11)                                                                                                                                                                                                                                                                                                                                                                                                                                                      | 42.84  | 110.31  | 0.39 | 1.10E-04 | 4.20E-04 |
| 6006 | 7 | F2-3 vs. S2-3 | 248453_at  | AT5G51340 | SCC4 is a tetratricopeptide repeat containing protein and a likely component of a plant cohesion loading complex along with its partner SSC2 It is expressed primarily in dividing cells. Loss of function mutants are embryo lethal, arresting by globular stage.                                                                                                                                                                                                                                            | 39.9   | 101.6   | 0.39 | 2.13E-04 | 6.89E-04 |
| 6007 | 7 | F2-3 vs. S2-3 | 255776_at  | AT1G18540 | Ribosomal protein L6 family protein;(source:Araport11)                                                                                                                                                                                                                                                                                                                                                                                                                                                        | 136.09 | 358.39  | 0.38 | 9.70E-06 | 7.40E-05 |
| 6008 | 7 | F2-3 vs. S2-3 | 262488_at  | AT1G21830 | hypothetical protein;(source:Araport11)<br>Member of plant TLP family. TLP7 is tethered to the PM but detaches upon stimulus and translocates to the nucleus. Has DNA binding activity but lacks conservation of the transcription activation domain.                                                                                                                                                                                                                                                         | 11.44  | 30      | 0.38 | 8.81E-05 | 3.56E-04 |
| 6009 | 7 | F2-3 vs. S2-3 | 260588_at  | AT1G53320 | hypothetical protein;(source:Araport11)                                                                                                                                                                                                                                                                                                                                                                                                                                                                       | 238.37 | 628.94  | 0.38 | 3.80E-06 | 3.79E-05 |
| 6010 | 7 | F2-3 vs. S2-3 | 262331_at  | AT1G64050 | Mitochondrial copper chaperone which influences copper and iron homeostasis.                                                                                                                                                                                                                                                                                                                                                                                                                                  | 11.04  | 28.84   | 0.38 | 3.00E-06 | 3.23E-05 |
| 6011 | 7 | F2-3 vs. S2-3 | 260418_s_a | AT1G66590 |                                                                                                                                                                                                                                                                                                                                                                                                                                                                                                               | 12.75  | 33.92   | 0.38 | 4.75E-04 | 1.27E-03 |
| 6012 | 7 | F2-3 vs. S2-3 | 260350_at  | AT1G69410 | Encodes eIF5A-2, a putative eukaryotic translation initiation factor. There are three eIF5A coding genes in Arabidopsis: eIF5A-1/At1g13950, eIF5A-2/At1g26630 and eIF5A-3/At1g69410.                                                                                                                                                                                                                                                                                                                          | 105.49 | 277.72  | 0.38 | 1.73E-04 | 5.91E-04 |
| 6013 | 7 | F2-3 vs. S2-3 | 245721_s_a | AT1G73450 | Protein kinase superfamily protein;(source:Araport11)<br>Predicted to encode a PR (pathogenesis-related) protein. Belongs to the plant defensin (PDF) family with the following members: At1g75830/PDF1.1, At5g44420/PDF1.2a, At2g26020/PDF1.2b, At5g44430/PDF1.2c, At2g26010/PDF1.3, At1g19610/PDF1.4, At1g55010/PDF1.5, At2g02120/PDF2.1, At2g02100/PDF2.2, At2g02130/PDF2.3, At1g61070/PDF2.4, At5g63660/PDF2.5, At2g02140/PDF2.6, At5g38330/PDF3.1 and At4g30070/PDF3.2. The mRNA is cell-to-cell mobile. | 182.79 | 484.29  | 0.38 | 7.00E-05 | 2.99E-04 |
| 6014 | 7 | F2-3 vs. S2-3 | 266119_at  | AT2G02100 | Encodes a myo-inositol oxygenase family gene.                                                                                                                                                                                                                                                                                                                                                                                                                                                                 | 594.61 | 1567.69 | 0.38 | 5.90E-06 | 5.12E-05 |
| 6015 | 7 | F2-3 vs. S2-3 | 266693_at  | AT2G19800 | Cytidine triphosphate synthase.                                                                                                                                                                                                                                                                                                                                                                                                                                                                               | 36.87  | 97.47   | 0.38 | 1.36E-05 | 9.28E-05 |
| 6016 | 7 | F2-3 vs. S2-3 | 257702_at  | AT3G12670 |                                                                                                                                                                                                                                                                                                                                                                                                                                                                                                               | 107.89 | 282.06  | 0.38 | 1.60E-05 | 1.04E-04 |
| 6017 | 7 | F2-3 vs. S2-3 | 257126_at  | AT3G20060 | Encodes one of two ubiquitin-conjugating enzymes belonging to the E2-C gene family (the other being UBC19). Transcript is always found in dividing cells, but also in other non-dividing cells.                                                                                                                                                                                                                                                                                                               | 48.77  | 128.94  | 0.38 | 3.22E-05 | 1.71E-04 |
| 6018 | 7 | F2-3 vs. S2-3 | 257225_s_a | AT3G27830 | Protein is localized to the cytoplasm as well as to the nucleus.                                                                                                                                                                                                                                                                                                                                                                                                                                              | 69.21  | 183.84  | 0.38 | 2.62E-05 | 1.48E-04 |
| 6019 | 7 | F2-3 vs. S2-3 | 252552_at  | AT3G45900 | 50S ribosomal protein L12-A The mRNA is cell-to-cell mobile.                                                                                                                                                                                                                                                                                                                                                                                                                                                  | 70.21  | 185.55  | 0.38 | 2.31E-05 | 1.35E-04 |
| 6020 | 7 | F2-3 vs. S2-3 | 252359_at  | AT3G48440 | Ribonuclease P protein subunit P38-like protein;(source:Araport11)                                                                                                                                                                                                                                                                                                                                                                                                                                            | 18.54  | 48.62   | 0.38 | 5.90E-04 | 1.51E-03 |
| 6021 | 7 | F2-3 vs. S2-3 | 251184_at  | AT3G62840 | Zinc finger C-x8-C-x5-C-x3-H type family protein;(source:Araport11)                                                                                                                                                                                                                                                                                                                                                                                                                                           | 113.3  | 297.88  | 0.38 | 1.00E-04 | 3.93E-04 |
| 6022 | 7 | F2-3 vs. S2-3 | 255128_at  | AT4G08310 | Small nuclear ribonucleoprotein family protein;(source:Araport11)                                                                                                                                                                                                                                                                                                                                                                                                                                             | 14.5   | 38.54   | 0.38 | 1.51E-04 | 5.33E-04 |
| 6023 | 7 | F2-3 vs. S2-3 | 250511_at  | AT5G09960 | DNA ligase;(source:Araport11)<br>sorbin/SH3 domain protein;(source:Araport11)                                                                                                                                                                                                                                                                                                                                                                                                                                 | 66.11  | 175.93  | 0.38 | 7.37E-05 | 3.10E-04 |
| 6024 | 7 | F2-3 vs. S2-3 | 250386_at  | AT5G11510 | Arabidopsis thaliana putative c-myb-like transcription factor MYB3R-4. Functions in powdery mildew induced host endoreduplication at the site of infection.                                                                                                                                                                                                                                                                                                                                                   | 30.27  | 80.44   | 0.38 | 5.93E-05 | 2.67E-04 |
| 6025 | 7 | F2-3 vs. S2-3 | 246920_at  | AT5G25090 | early nodulin-like protein 13;(source:Araport11)                                                                                                                                                                                                                                                                                                                                                                                                                                                              | 15.15  | 40.24   | 0.38 | 7.80E-06 | 6.27E-05 |
| 6026 | 7 | F2-3 vs. S2-3 | 246849_at  | AT5G26850 | Uncharacterized protein;(source:Araport11)<br>RRP7 shares limited sequence similarity to human and yeast RRP7. In Arabidopsis RRP7 functions in 18S ribosomal RNA maturation.                                                                                                                                                                                                                                                                                                                                 | 278.12 | 734.16  | 0.38 | 1.24E-05 | 8.66E-05 |
| 6027 | 7 | F2-3 vs. S2-3 | 249528_at  | AT5G38720 | Protein of unknown function that may be involved in stress response. Strongly expressed in vascular tissues. Mutants are ABA- insensitive.                                                                                                                                                                                                                                                                                                                                                                    | 99.58  | 260.03  | 0.38 | 2.87E-05 | 1.57E-04 |
| 6028 | 7 | F2-3 vs. S2-3 | 248691_at  | AT5G48310 | Converts pentacyclic cyclopropyl sterols to conventional tetracyclic sterols. CPI1 function during and just after division and support gravitropism by establishing polar PIN2 localization. Required for endocytosis of PIN2                                                                                                                                                                                                                                                                                 | 55.39  | 143.9   | 0.38 | 8.44E-05 | 3.44E-04 |
| 6029 | 7 | F2-3 vs. S2-3 | 248511_at  | AT5G50375 | LOW protein: M-phase inducer phosphatase-like protein;(source:Araport11)                                                                                                                                                                                                                                                                                                                                                                                                                                      | 48.03  | 126.11  | 0.38 | 1.03E-04 | 4.01E-04 |
| 6030 | 7 | F2-3 vs. S2-3 | 247457_at  | AT5G62170 |                                                                                                                                                                                                                                                                                                                                                                                                                                                                                                               | 12.95  | 33.87   | 0.38 | 1.35E-05 | 9.22E-05 |
| 6031 | 7 | F2-3 vs. S2-3 | 264331_at  | AT1G04130 | Encodes one of the 36 carboxylate clamp (CC)-tetratricopeptide repeat (TPR) proteins (Prasad 2010, Pubmed ID: 20856808). Interacts with Hsp90/Hsp70 as co-chaperone.                                                                                                                                                                                                                                                                                                                                          | 24.67  | 66.07   | 0.37 | 6.20E-04 | 1.56E-03 |

|      |   |               |           |           |                                                                                                                                                                                                                                                                                                                                                                                                                                                                                                                                                                                                                                                                                                                                                                                                                                                                                                                                 |        |        |      |          |          |
|------|---|---------------|-----------|-----------|---------------------------------------------------------------------------------------------------------------------------------------------------------------------------------------------------------------------------------------------------------------------------------------------------------------------------------------------------------------------------------------------------------------------------------------------------------------------------------------------------------------------------------------------------------------------------------------------------------------------------------------------------------------------------------------------------------------------------------------------------------------------------------------------------------------------------------------------------------------------------------------------------------------------------------|--------|--------|------|----------|----------|
| 6032 | 7 | F2-3 vs. S2-3 | 261603_at | AT1G49600 | RNA-binding protein 47A;(source:Araport11)<br>Required for maintenance of inflorescence and shoot SAMs and normal development of the derived vascular cambium, functions in the SAM to promote continuous organogenesis, affects SAM development through STM, where it affects intracellular localization of STM in SAM cells in the peripheral region and prevents STM localization toward the cell wall of SAM cells in the peripheral region.                                                                                                                                                                                                                                                                                                                                                                                                                                                                                | 22.04  | 59.27  | 0.37 | 7.17E-05 | 3.04E-04 |
| 6033 | 7 | F2-3 vs. S2-3 | 260511_at | AT1G51570 | oligouridylate-binding protein 1A;(source:Araport11)                                                                                                                                                                                                                                                                                                                                                                                                                                                                                                                                                                                                                                                                                                                                                                                                                                                                            | 16.66  | 44.7   | 0.37 | 2.36E-05 | 1.37E-04 |
| 6034 | 7 | F2-3 vs. S2-3 | 263160_at | AT1G54080 | nuclear fusion defective 6;(source:Araport11)                                                                                                                                                                                                                                                                                                                                                                                                                                                                                                                                                                                                                                                                                                                                                                                                                                                                                   | 60.11  | 164.05 | 0.37 | 9.40E-06 | 7.23E-05 |
| 6035 | 7 | F2-3 vs. S2-3 | 263712_at | AT2G20585 | early nodulin-like protein 14;(source:Araport11)                                                                                                                                                                                                                                                                                                                                                                                                                                                                                                                                                                                                                                                                                                                                                                                                                                                                                | 57.08  | 152.42 | 0.37 | 1.96E-05 | 1.19E-04 |
| 6036 | 7 | F2-3 vs. S2-3 | 264377_at | AT2G25060 | Chaperone DnaJ-domain superfamily protein;(source:Araport11)                                                                                                                                                                                                                                                                                                                                                                                                                                                                                                                                                                                                                                                                                                                                                                                                                                                                    | 46.88  | 125.23 | 0.37 | 1.15E-05 | 8.34E-05 |
| 6037 | 7 | F2-3 vs. S2-3 | 265826_at | AT2G35795 | GDSL-motif esterase/acyltransferase/lipase. Enzyme group with broad substrate specificity that may catalyze acyltransfer or hydrolase reactions with lipid and non-lipid substrates.                                                                                                                                                                                                                                                                                                                                                                                                                                                                                                                                                                                                                                                                                                                                            | 109.84 | 296.49 | 0.37 | 3.60E-06 | 3.67E-05 |
| 6038 | 7 | F2-3 vs. S2-3 | 259308_at | AT3G05180 | dolichyl-diphosphooligosaccharide-protein glycosyltransferase subunit;(source:Araport11)                                                                                                                                                                                                                                                                                                                                                                                                                                                                                                                                                                                                                                                                                                                                                                                                                                        | 14.5   | 38.79  | 0.37 | 9.23E-05 | 3.68E-04 |
| 6039 | 7 | F2-3 vs. S2-3 | 258699_at | AT3G09455 | Chaperone DnaJ-domain superfamily protein;(source:Araport11)                                                                                                                                                                                                                                                                                                                                                                                                                                                                                                                                                                                                                                                                                                                                                                                                                                                                    | 205.21 | 548.13 | 0.37 | 1.36E-04 | 4.90E-04 |
| 6040 | 7 | F2-3 vs. S2-3 | 257654_at | AT3G13310 | Encodes photosystem II 5 kD protein subunit PSII-T. This is a nuclear-encoded gene (PsbTn) which also has a plastid-encoded paralog (PsbTc).                                                                                                                                                                                                                                                                                                                                                                                                                                                                                                                                                                                                                                                                                                                                                                                    | 23.23  | 63.17  | 0.37 | 1.77E-04 | 6.01E-04 |
| 6041 | 7 | F2-3 vs. S2-3 | 256979_at | AT3G21055 | Required for normal meiosis, may act in the last round of DNA replication prior to meiosis, sequence similar to yeast CDC45                                                                                                                                                                                                                                                                                                                                                                                                                                                                                                                                                                                                                                                                                                                                                                                                     | 174.73 | 472.39 | 0.37 | 5.70E-06 | 5.00E-05 |
| 6042 | 7 | F2-3 vs. S2-3 | 257813_at | AT3G25100 | Floral homeotic gene encoding a MADS domain transcription factor. Specifies floral meristem and carpel and stamen identity. Binds CArG box sequences. It is the only C function gene. It interacts genetically with the other homeotic genes to specify the floral organs.                                                                                                                                                                                                                                                                                                                                                                                                                                                                                                                                                                                                                                                      | 87.02  | 237.6  | 0.37 | 5.67E-05 | 2.59E-04 |
| 6043 | 7 | F2-3 vs. S2-3 | 254595_at | AT4G18960 | Involved in vernalization. Required for epigenetic silencing of FLC, and for vernalization-mediated histone modification.                                                                                                                                                                                                                                                                                                                                                                                                                                                                                                                                                                                                                                                                                                                                                                                                       | 92.44  | 246.51 | 0.37 | 1.50E-04 | 5.32E-04 |
| 6044 | 7 | F2-3 vs. S2-3 | 253558_at | AT4G31120 | early nodulin-like protein 15;(source:Araport11)                                                                                                                                                                                                                                                                                                                                                                                                                                                                                                                                                                                                                                                                                                                                                                                                                                                                                | 167.03 | 456.35 | 0.37 | 8.92E-05 | 3.59E-04 |
| 6045 | 7 | F2-3 vs. S2-3 | 253480_at | AT4G31840 | encodes a cyclin D-type protein involved in the switch from cell proliferation to the final stages of differentiation. The gene is transcriptionally regulated by cytokinin and brassinosteroid. Protein interacts with cyclin-dependent kinase inhibitor ICK1.                                                                                                                                                                                                                                                                                                                                                                                                                                                                                                                                                                                                                                                                 | 53.29  | 145.72 | 0.37 | 6.31E-05 | 2.77E-04 |
| 6046 | 7 | F2-3 vs. S2-3 | 253270_at | AT4G34160 | hypothetical protein;(source:Araport11)                                                                                                                                                                                                                                                                                                                                                                                                                                                                                                                                                                                                                                                                                                                                                                                                                                                                                         | 27.45  | 75.09  | 0.37 | 9.70E-06 | 7.40E-05 |
| 6047 | 7 | F2-3 vs. S2-3 | 246506_at | AT5G16110 | Ribosomal protein S4;(source:Araport11)                                                                                                                                                                                                                                                                                                                                                                                                                                                                                                                                                                                                                                                                                                                                                                                                                                                                                         | 62.38  | 166.49 | 0.37 | 1.21E-05 | 8.58E-05 |
| 6048 | 7 | F2-3 vs. S2-3 | 249427_at | AT5G39850 | Encodes a member of the SWEET sucrose efflux transporter family proteins. Transcriptionally activated by long photoperiods; activation depends on FT and SOC1. The ectopic expression of SWEET10 causes early flowering and leads to higher levels of transcription of flowering-time related genes in the shoot apex.                                                                                                                                                                                                                                                                                                                                                                                                                                                                                                                                                                                                          | 202.46 | 553.33 | 0.37 | 2.60E-06 | 2.94E-05 |
| 6049 | 7 | F2-3 vs. S2-3 | 248496_at | AT5G50790 | Glyoxalase which affects ABA?JA crosstalk.                                                                                                                                                                                                                                                                                                                                                                                                                                                                                                                                                                                                                                                                                                                                                                                                                                                                                      | 30.21  | 81.61  | 0.37 | 6.10E-06 | 5.23E-05 |
| 6050 | 7 | F2-3 vs. S2-3 | 262603_at | AT1G15380 | hypothetical protein;(source:Araport11)                                                                                                                                                                                                                                                                                                                                                                                                                                                                                                                                                                                                                                                                                                                                                                                                                                                                                         | 173.92 | 478.59 | 0.36 | 2.52E-05 | 1.43E-04 |
| 6051 | 7 | F2-3 vs. S2-3 | 259515_at | AT1G20430 | member of NPSN Gene Family                                                                                                                                                                                                                                                                                                                                                                                                                                                                                                                                                                                                                                                                                                                                                                                                                                                                                                      | 25.04  | 68.77  | 0.36 | 1.10E-05 | 8.08E-05 |
| 6052 | 7 | F2-3 vs. S2-3 | 262245_at | AT1G48240 | The FUSED (FU) gene belongs to Ser/Thr protein kinase family and has a key role in the hedgehog signaling pathway known to control cell proliferation and patterning in fruit flies and humans . Arabidopsis thaliana genome has a single Fu gene that is involved in male meiosis cytokinesis. Cytokinesis-defective mutants, named two-in-one (tio), result from mutations in Arabidopsis Fu. Phenotypic analysis of tio mutants reveals an essential role for TIO in conventional modes of cytokinesis in plant meristems and during male gametogenesis. TIO is tightly localized to the midline of the nascent phragmoplast and remains associated with the expanding phragmoplast ring. This gene was previously annotated as two gene models, AT1G50230.1 and AT1G50240.1, however the experimental evidence exists (Oh et al, Current Biology, 2005) showing that these two models are in fact single gene, named FUSED. | 12.34  | 34.03  | 0.36 | 9.38E-05 | 3.73E-04 |
| 6053 | 7 | F2-3 vs. S2-3 | 262467_at | AT1G50240 | RNA-binding (RRM/RBD/RNP motifs) family protein;(source:Araport11)                                                                                                                                                                                                                                                                                                                                                                                                                                                                                                                                                                                                                                                                                                                                                                                                                                                              | 83.56  | 233.16 | 0.36 | 3.53E-05 | 1.84E-04 |
| 6054 | 7 | F2-3 vs. S2-3 | 265930_at | AT2G18510 | AGCVIII kinase involved in the pulse-induced first positive phototropism. Plasma-membrane-associated element of a molecular rheostat that modulates auxin flux through developing protophloem sieve elements (PPSEs) while interacting with BRX, thereby timing PPSE differentiation. Activates PIN-mediated auxin efflux.                                                                                                                                                                                                                                                                                                                                                                                                                                                                                                                                                                                                      | 16.11  | 45.3   | 0.36 | 4.45E-05 | 2.18E-04 |
| 6055 | 7 | F2-3 vs. S2-3 | 266812_at | AT2G44830 | DNA glycosylase superfamily protein;(source:Araport11)                                                                                                                                                                                                                                                                                                                                                                                                                                                                                                                                                                                                                                                                                                                                                                                                                                                                          | 40.53  | 113.12 | 0.36 | 1.77E-05 | 1.11E-04 |
| 6056 | 7 | F2-3 vs. S2-3 | 257701_at | AT3G12710 |                                                                                                                                                                                                                                                                                                                                                                                                                                                                                                                                                                                                                                                                                                                                                                                                                                                                                                                                 | 44.8   | 125.8  | 0.36 | 9.90E-06 | 7.47E-05 |

|                                                                                                                                                                                                                                                                                                                                                                                                                                                                                                                                                                                                                                                                                                                                                                              |   |               |            |           |                                                                                                                                |         |         |      |          |          |
|------------------------------------------------------------------------------------------------------------------------------------------------------------------------------------------------------------------------------------------------------------------------------------------------------------------------------------------------------------------------------------------------------------------------------------------------------------------------------------------------------------------------------------------------------------------------------------------------------------------------------------------------------------------------------------------------------------------------------------------------------------------------------|---|---------------|------------|-----------|--------------------------------------------------------------------------------------------------------------------------------|---------|---------|------|----------|----------|
| 6057                                                                                                                                                                                                                                                                                                                                                                                                                                                                                                                                                                                                                                                                                                                                                                         | 7 | F2-3 vs. S2-3 | 251194_at  | AT3G62920 | zinc metalloproteinase aureolysin;(source:Araport11)                                                                           | 9.8     | 27.49   | 0.36 | 1.11E-04 | 4.23E-04 |
| 6058                                                                                                                                                                                                                                                                                                                                                                                                                                                                                                                                                                                                                                                                                                                                                                         | 7 | F2-3 vs. S2-3 | 253668_at  | AT4G30220 | small nuclear ribonucleoprotein F;(source:Araport11)                                                                           | 274.7   | 772.6   | 0.36 | 4.10E-06 | 4.02E-05 |
| 6059                                                                                                                                                                                                                                                                                                                                                                                                                                                                                                                                                                                                                                                                                                                                                                         | 7 | F2-3 vs. S2-3 | 253304_at  | AT4G33640 | costars family protein;(source:Araport11)                                                                                      | 96.35   | 269.97  | 0.36 | 6.10E-06 | 5.23E-05 |
| 6060                                                                                                                                                                                                                                                                                                                                                                                                                                                                                                                                                                                                                                                                                                                                                                         | 7 | F2-3 vs. S2-3 | 250718_at  | AT5G06240 | embryo defective 2735;(source:Araport11)                                                                                       | 13.08   | 35.85   | 0.36 | 5.70E-06 | 5.00E-05 |
| 6061                                                                                                                                                                                                                                                                                                                                                                                                                                                                                                                                                                                                                                                                                                                                                                         | 7 | F2-3 vs. S2-3 | 249424_s_a | AT5G39800 | Mitochondrial ribosomal protein L27;(source:Araport11)                                                                         | 56.74   | 158.28  | 0.36 | 1.30E-06 | 1.81E-05 |
| 6062                                                                                                                                                                                                                                                                                                                                                                                                                                                                                                                                                                                                                                                                                                                                                                         | 7 | F2-3 vs. S2-3 | 247692_s_a | AT5G59970 | Histone superfamily protein;(source:Araport11)                                                                                 | 456.56  | 1283.75 | 0.36 | 2.98E-05 | 1.61E-04 |
| A member of mei2-like gene family, predominantly plant-based family of genes encoding RNA binding proteins with characteristic presence of a highly conserved RNA binding motif first described in the mei2 gene of the fission yeast <i>S. pombe</i> . In silico analyses reveal nine mei2-like genes in <i>A. thaliana</i> . They were grouped into four distinct clades, based on overall sequence similarity and subfamily-specific sequence elements. AML1 is a member of two sister clades of mei2-like gene family, AML1 through AML5 and belongs to the clade named ALM14. AML1 is expressed during early embryo development, particularly along embryonic axis at torpedo stage, in shoot apex (weaker expression) and in the organogenic regions of floral apices. |   |               |            |           |                                                                                                                                | 55.32   | 152.25  | 0.36 | 1.57E-05 | 1.02E-04 |
| 6063                                                                                                                                                                                                                                                                                                                                                                                                                                                                                                                                                                                                                                                                                                                                                                         | 7 | F2-3 vs. S2-3 | 247506_at  | AT5G61960 | chloroplast 30S ribosomal protein S8                                                                                           | 339.15  | 953.05  | 0.36 | 3.70E-06 | 3.73E-05 |
| 6064                                                                                                                                                                                                                                                                                                                                                                                                                                                                                                                                                                                                                                                                                                                                                                         | 7 | F2-3 vs. S2-3 | 244981_at  | ATCG00770 |                                                                                                                                |         |         |      |          |          |
| 6065                                                                                                                                                                                                                                                                                                                                                                                                                                                                                                                                                                                                                                                                                                                                                                         | 7 | F2-3 vs. S2-3 | 256062_at  | AT1G07090 | LIGHT-DEPENDENT SHORT HYPOCOTYLS-like protein (DUF640);(source:Araport11)                                                      | 11.58   | 33.23   | 0.35 | 7.20E-06 | 5.94E-05 |
| 6066                                                                                                                                                                                                                                                                                                                                                                                                                                                                                                                                                                                                                                                                                                                                                                         | 7 | F2-3 vs. S2-3 | 256460_at  | AT1G36240 | Ribosomal protein L7Ae/L30e/S12e/Gadd45 family protein;(source:Araport11)                                                      | 940.82  | 2650.9  | 0.35 | 1.68E-05 | 1.07E-04 |
| 6067                                                                                                                                                                                                                                                                                                                                                                                                                                                                                                                                                                                                                                                                                                                                                                         | 7 | F2-3 vs. S2-3 | 266700_at  | AT2G19740 | Ribosomal protein L31e family protein;(source:Araport11)                                                                       | 442.3   | 1246.67 | 0.35 | 6.80E-06 | 5.69E-05 |
| 6068                                                                                                                                                                                                                                                                                                                                                                                                                                                                                                                                                                                                                                                                                                                                                                         | 7 | F2-3 vs. S2-3 | 265390_at  | AT2G20820 | hypothetical protein;(source:Araport11)                                                                                        | 582.09  | 1652.12 | 0.35 | 7.30E-06 | 6.00E-05 |
| 6069                                                                                                                                                                                                                                                                                                                                                                                                                                                                                                                                                                                                                                                                                                                                                                         | 7 | F2-3 vs. S2-3 | 266845_at  | AT2G26110 | bromodomain protein (DUF761);(source:Araport11)                                                                                | 17.66   | 50.86   | 0.35 | 1.00E-06 | 1.54E-05 |
| Encodes a protein with similarity to WUS type homeodomain protein. Required for meristem growth and development and acts through positive regulation of WUS. Loss of function phenotypes include embryo lethality, hyponastic cotyledons, reduced root development and smaller meristems. Phenotypes can be rescued by addition of sucrose in the growth media. Overexpression can partially rescue the triple mutant cytokinin receptor phenotype suggesting HB-3 is a downstream effector of cytokinin signaling.                                                                                                                                                                                                                                                          |   |               |            |           |                                                                                                                                | 29.68   | 85.92   | 0.35 | 3.63E-04 | 1.04E-03 |
| 6070                                                                                                                                                                                                                                                                                                                                                                                                                                                                                                                                                                                                                                                                                                                                                                         | 7 | F2-3 vs. S2-3 | 267453_at  | AT2G33880 | Zinc-binding ribosomal protein family protein;(source:Araport11)                                                               | 431.41  | 1217.44 | 0.35 | 3.40E-06 | 3.52E-05 |
| 6071                                                                                                                                                                                                                                                                                                                                                                                                                                                                                                                                                                                                                                                                                                                                                                         | 7 | F2-3 vs. S2-3 | 267507_at  | AT2G45710 |                                                                                                                                |         |         |      |          |          |
| 6072                                                                                                                                                                                                                                                                                                                                                                                                                                                                                                                                                                                                                                                                                                                                                                         | 7 | F2-3 vs. S2-3 | 266460_at  | AT2G47930 | arabinogalactan protein 26;(source:Araport11)                                                                                  | 23.29   | 67.03   | 0.35 | 4.82E-05 | 2.31E-04 |
| 6073                                                                                                                                                                                                                                                                                                                                                                                                                                                                                                                                                                                                                                                                                                                                                                         | 7 | F2-3 vs. S2-3 | 257610_at  | AT3G13810 | indeterminate(ID)-domain 11;(source:Araport11)                                                                                 | 17.78   | 50.15   | 0.35 | 1.77E-04 | 6.00E-04 |
| 6074                                                                                                                                                                                                                                                                                                                                                                                                                                                                                                                                                                                                                                                                                                                                                                         | 7 | F2-3 vs. S2-3 | 258284_at  | AT3G16080 | Zinc-binding ribosomal protein family protein;(source:Araport11)                                                               | 1592.86 | 4613.55 | 0.35 | 1.58E-05 | 1.03E-04 |
| 6075                                                                                                                                                                                                                                                                                                                                                                                                                                                                                                                                                                                                                                                                                                                                                                         | 7 | F2-3 vs. S2-3 | 252089_at  | AT3G52110 | interferon-activable protein;(source:Araport11)                                                                                | 15.75   | 45.25   | 0.35 | 2.38E-04 | 7.47E-04 |
| Cytosolic ribosomal protein. Mutants enhance the variegation effect of var2 mutations suggesting a link between cytosolic translation and chloroplast development.                                                                                                                                                                                                                                                                                                                                                                                                                                                                                                                                                                                                           |   |               |            |           |                                                                                                                                | 18.15   | 51.37   | 0.35 | 2.68E-05 | 1.50E-04 |
| 6076                                                                                                                                                                                                                                                                                                                                                                                                                                                                                                                                                                                                                                                                                                                                                                         | 7 | F2-3 vs. S2-3 | 251921_at  | AT3G53890 | sulfate transporter 3;(source:Araport11)                                                                                       | 16.95   | 48.89   | 0.35 | 2.50E-06 | 2.85E-05 |
| 6077                                                                                                                                                                                                                                                                                                                                                                                                                                                                                                                                                                                                                                                                                                                                                                         | 7 | F2-3 vs. S2-3 | 255443_at  | AT4G02700 | Origin Recognition Complex subunit 5. Involved in the initiation of DNA replication. Interacts strongly with all ORC subunits. | 47.3    | 135.14  | 0.35 | 1.74E-05 | 1.10E-04 |
| Encodes a member of the PYR (pyrabactin resistance )/PYL(PYR1-like)/RCAR (regulatory components of ABA receptor) family proteins with 14 members. PYR/PYL/RCAR family proteins function as abscisic acid sensors. Mediate ABA-dependent regulation of protein phosphatase 2Cs ABI1 and ABI2.                                                                                                                                                                                                                                                                                                                                                                                                                                                                                 |   |               |            |           |                                                                                                                                | 30.49   | 86.21   | 0.35 | 1.10E-05 | 8.08E-05 |
| 6078                                                                                                                                                                                                                                                                                                                                                                                                                                                                                                                                                                                                                                                                                                                                                                         | 7 | F2-3 vs. S2-3 | 253703_at  | AT4G29910 |                                                                                                                                |         |         |      |          |          |
| 6079                                                                                                                                                                                                                                                                                                                                                                                                                                                                                                                                                                                                                                                                                                                                                                         | 7 | F2-3 vs. S2-3 | 250777_at  | AT5G05440 |                                                                                                                                |         |         |      |          |          |
| Encodes a member of KPP-like gene family, homolog of KPP (kinase partner protein) gene in tomato. Also a member of the RopGEF (guanine nucleotide exchange factor) family, containing the novel PRONE domain (plant-specific Rop nucleotide exchanger), which is exclusively active towards members of the Rop subfamily.                                                                                                                                                                                                                                                                                                                                                                                                                                                    |   |               |            |           |                                                                                                                                | 13.93   | 39.84   | 0.35 | 1.48E-04 | 5.26E-04 |
| 6080                                                                                                                                                                                                                                                                                                                                                                                                                                                                                                                                                                                                                                                                                                                                                                         | 7 | F2-3 vs. S2-3 | 250756_at  | AT5G05940 |                                                                                                                                |         |         |      |          |          |
| 6081                                                                                                                                                                                                                                                                                                                                                                                                                                                                                                                                                                                                                                                                                                                                                                         | 7 | F2-3 vs. S2-3 | 246125_at  | AT5G19875 | transmembrane protein;(source:Araport11)                                                                                       | 18.83   | 53.53   | 0.35 | 8.80E-06 | 6.88E-05 |
| 6082                                                                                                                                                                                                                                                                                                                                                                                                                                                                                                                                                                                                                                                                                                                                                                         | 7 | F2-3 vs. S2-3 | 249945_at  | AT5G22440 | Ribosomal protein L1p/L10e family;(source:Araport11)                                                                           | 115.05  | 333.45  | 0.35 | 5.20E-06 | 4.73E-05 |
| 6083                                                                                                                                                                                                                                                                                                                                                                                                                                                                                                                                                                                                                                                                                                                                                                         | 7 | F2-3 vs. S2-3 | 249268_at  | AT5G41685 | Mitochondrial outer membrane translocase complex, subunit Tom7;(source:Araport11)                                              | 10.88   | 30.91   | 0.35 | 1.29E-05 | 8.96E-05 |
| 6084                                                                                                                                                                                                                                                                                                                                                                                                                                                                                                                                                                                                                                                                                                                                                                         | 7 | F2-3 vs. S2-3 | 248613_at  | AT5G49555 | FAD/NAD(P)-binding oxidoreductase family protein;(source:Araport11)                                                            | 108.95  | 311.02  | 0.35 | 1.52E-05 | 1.00E-04 |
| 6085                                                                                                                                                                                                                                                                                                                                                                                                                                                                                                                                                                                                                                                                                                                                                                         | 7 | F2-3 vs. S2-3 | 248102_at  | AT5G55140 | ribosomal protein L30 family protein;(source:Araport11)                                                                        | 39.29   | 111.41  | 0.35 | 4.75E-05 | 2.28E-04 |
| 6086                                                                                                                                                                                                                                                                                                                                                                                                                                                                                                                                                                                                                                                                                                                                                                         | 7 | F2-3 vs. S2-3 | 248041_at  | AT5G55940 | Uncharacterized protein family (UPF0172);(source:Araport11)                                                                    | 106.29  | 307.58  | 0.35 | 3.50E-06 | 3.60E-05 |

|      |   |               |            |           |                                                                                                                                                                                                                                                                                                                                                                                                                                                                                                                                                                                                                                                                                             |         |         |      |          |          |
|------|---|---------------|------------|-----------|---------------------------------------------------------------------------------------------------------------------------------------------------------------------------------------------------------------------------------------------------------------------------------------------------------------------------------------------------------------------------------------------------------------------------------------------------------------------------------------------------------------------------------------------------------------------------------------------------------------------------------------------------------------------------------------------|---------|---------|------|----------|----------|
|      |   |               |            |           | Encodes a transthyretin-like S-allantoin synthase protein that catalyzes two steps in the allantoin biosynthesis pathway by acting as a hydroxyisourate hydrolase and a 2-oxo-4-hydroxy-4-carboxy-5-ureidoimidazole (OHCU) decarboxylase. Two alternatively spliced versions of the transcript give rise to a longer peroxisomally-targeted protein (AT5G58220.1 (called TTL1-)) and a slightly shorter cytoplasmic protein (AT5G58220.3 (called TTL2-)). Both have roughly equivalent enzymatic activity in vitro, but, allantoin biosynthesis is believed to occur in the peroxisome suggesting that the cytosolic form may participate in a different process.                           | 26.29   | 75.77   | 0.35 | 1.53E-05 | 1.00E-04 |
| 6087 | 7 | F2-3 vs. S2-3 | 247858_at  | AT5G58220 | SBT4.13 subtilase. Activity is inhibited by SPI-1.                                                                                                                                                                                                                                                                                                                                                                                                                                                                                                                                                                                                                                          | 21.31   | 61.64   | 0.35 | 3.74E-04 | 1.06E-03 |
| 6088 | 7 | F2-3 vs. S2-3 | 247758_at  | AT5G59120 | Ribosomal protein S19e family protein;(source:Araport11)                                                                                                                                                                                                                                                                                                                                                                                                                                                                                                                                                                                                                                    | 846.08  | 2396.68 | 0.35 | 1.50E-06 | 2.00E-05 |
| 6089 | 7 | F2-3 vs. S2-3 | 247566_at  | AT5G61170 | transcription termination factor;(source:Araport11)                                                                                                                                                                                                                                                                                                                                                                                                                                                                                                                                                                                                                                         | 22.17   | 62.78   | 0.35 | 5.13E-05 | 2.42E-04 |
| 6090 | 7 | F2-3 vs. S2-3 | 247375_at  | AT5G63135 | cAMP-regulated phosphoprotein 19-related protein;(source:Araport11)                                                                                                                                                                                                                                                                                                                                                                                                                                                                                                                                                                                                                         | 345.96  | 990.95  | 0.35 | 2.22E-04 | 7.11E-04 |
| 6091 | 7 | F2-3 vs. S2-3 | 247328_at  | AT5G64130 | Belongs to the group of plant flotillins, which are plasma membrane proteins. Flot3 is found in membrane nanodomains.                                                                                                                                                                                                                                                                                                                                                                                                                                                                                                                                                                       | 74.09   | 214.23  | 0.35 | 3.40E-06 | 3.52E-05 |
| 6092 | 7 | F2-3 vs. S2-3 | 247208_at  | AT5G64870 | Cox19 family protein (CHCH motif);(source:Araport11)                                                                                                                                                                                                                                                                                                                                                                                                                                                                                                                                                                                                                                        | 179.56  | 532.06  | 0.34 | 1.38E-05 | 9.39E-05 |
| 6093 | 7 | F2-3 vs. S2-3 | 264173_at  | AT1G02160 |                                                                                                                                                                                                                                                                                                                                                                                                                                                                                                                                                                                                                                                                                             |         |         |      |          |          |
| 6094 | 7 | F2-3 vs. S2-3 | 262490_at  | AT1G21840 | Encodes a urease accessory protein which is essential for the activation of plant urease.                                                                                                                                                                                                                                                                                                                                                                                                                                                                                                                                                                                                   | 23.85   | 71.05   | 0.34 | 2.30E-06 | 2.69E-05 |
| 6095 | 7 | F2-3 vs. S2-3 | 260941_at  | AT1G44970 | Encodes a class III peroxidase that is genetically redundant with PRX40, expressed in the tapetum, and essential for proper anther and pollen development.                                                                                                                                                                                                                                                                                                                                                                                                                                                                                                                                  | 13.26   | 38.53   | 0.34 | 1.73E-04 | 5.91E-04 |
|      |   |               |            |           | Encodes a nuclear cap-binding protein that forms a heterodimeric complex with CBP20 and is involved in ABA signaling and flowering. Mutants are early flowering and exhibit hypersensitive response to ABA in germination inhibition.Loss of ABH1 function results in abnormal processing of mRNAs for several important floral regulators (FLC, CO, FLM). Analysis of loss of function mutations suggests a role in pri-miRNA processing and mRNA splicing. Note that two different mutant alleles were given the same name abh1-7 (Kuhn et al 2007; Kim et al 2008). To avoid confusion, abh1-7 described in Kim et al (2008) has been renamed abh1-107 (other names: ensalada-1, ens-1). | 77.1    | 226.44  | 0.34 | 1.21E-04 | 4.51E-04 |
| 6096 | 7 | F2-3 vs. S2-3 | 263727_at  | AT2G13540 | Encodes a heme oxygenase-like protein lacking the conserved histidine residue at the active site that is usually involved in heme-iron coordination. It is unable to bind and degrade heme. Mutant analyses suggest a role in photomorphogenesis. The protein can bind the heme precursor, proto IX, which could be biologically significant and point to a role in the regulation of the two tetrapyrrole biosynthetic pathways.                                                                                                                                                                                                                                                           | 19.83   | 58.53   | 0.34 | 4.83E-05 | 2.31E-04 |
| 6097 | 7 | F2-3 vs. S2-3 | 245027_at  | AT2G26550 | Ribosomal L27e protein family;(source:Araport11)                                                                                                                                                                                                                                                                                                                                                                                                                                                                                                                                                                                                                                            | 21      | 61.46   | 0.34 | 1.60E-06 | 2.10E-05 |
| 6098 | 7 | F2-3 vs. S2-3 | 265730_at  | AT2G32220 | Encodes cytoplasmic ribosomal protein L18.                                                                                                                                                                                                                                                                                                                                                                                                                                                                                                                                                                                                                                                  | 1189.48 | 3464.47 | 0.34 | 7.50E-06 | 6.08E-05 |
| 6099 | 7 | F2-3 vs. S2-3 | 258900_at  | AT3G05590 | CHC protein involved in cell cycle progression (positive regulator).                                                                                                                                                                                                                                                                                                                                                                                                                                                                                                                                                                                                                        | 73.51   | 215.6   | 0.34 | 3.57E-05 | 1.86E-04 |
| 6100 | 7 | F2-3 vs. S2-3 | 258324_at  | AT3G22780 | low affinity phosphate transporter                                                                                                                                                                                                                                                                                                                                                                                                                                                                                                                                                                                                                                                          | 74.68   | 219.2   | 0.34 | 1.20E-06 | 1.75E-05 |
| 6101 | 7 | F2-3 vs. S2-3 | 257311_at  | AT3G26570 | Encodes a hydroxyproline-rich glycoprotein.The mRNA is cell-to-cell mobile.                                                                                                                                                                                                                                                                                                                                                                                                                                                                                                                                                                                                                 | 17.89   | 52.44   | 0.34 | 1.09E-04 | 4.19E-04 |
| 6102 | 7 | F2-3 vs. S2-3 | 251843_x_a | AT3G54590 | Encodes a protein that is involved in mRNA processing and localized to cytoplasmic p-bodies. Double mutants with CCR4b show decreased sensitivity to high concentrations of sucrose. Involved in starch and sucrose metabolism.                                                                                                                                                                                                                                                                                                                                                                                                                                                             | 37.97   | 111     | 0.34 | 2.06E-05 | 1.24E-04 |
| 6103 | 7 | F2-3 vs. S2-3 | 251581_at  | AT3G58560 | senescence-associated family protein (DUF581);(source:Araport11)                                                                                                                                                                                                                                                                                                                                                                                                                                                                                                                                                                                                                            | 19.92   | 59.02   | 0.34 | 6.34E-05 | 2.78E-04 |
| 6104 | 7 | F2-3 vs. S2-3 | 245401_at  | AT4G17670 | RNA binding Plectin/S10 domain-containing protein;(source:Araport11)                                                                                                                                                                                                                                                                                                                                                                                                                                                                                                                                                                                                                        | 830.53  | 2473.96 | 0.34 | 5.00E-06 | 4.58E-05 |
| 6105 | 7 | F2-3 vs. S2-3 | 254049_at  | AT4G25740 | hypothetical protein;(source:Araport11)                                                                                                                                                                                                                                                                                                                                                                                                                                                                                                                                                                                                                                                     | 14.1    | 41.79   | 0.34 | 2.61E-05 | 1.47E-04 |
| 6106 | 7 | F2-3 vs. S2-3 | 253802_at  | AT4G28180 | Ribosomal protein S30 family protein;(source:Araport11)                                                                                                                                                                                                                                                                                                                                                                                                                                                                                                                                                                                                                                     | 634.69  | 1889.05 | 0.34 | 2.01E-05 | 1.22E-04 |
| 6107 | 7 | F2-3 vs. S2-3 | 253715_at  | AT4G29390 | TLC ATP/ADP transporter;(source:Araport11)                                                                                                                                                                                                                                                                                                                                                                                                                                                                                                                                                                                                                                                  | 41.11   | 121.61  | 0.34 | 2.87E-05 | 1.57E-04 |
| 6108 | 7 | F2-3 vs. S2-3 | 250797_at  | AT5G05310 | Ribosomal protein S8e family protein;(source:Araport11)                                                                                                                                                                                                                                                                                                                                                                                                                                                                                                                                                                                                                                     | 86.23   | 252.28  | 0.34 | 7.00E-07 | 1.20E-05 |
| 6109 | 7 | F2-3 vs. S2-3 | 250703_at  | AT5G06360 | Histone superfamily protein;(source:Araport11)                                                                                                                                                                                                                                                                                                                                                                                                                                                                                                                                                                                                                                              | 71.93   | 212.8   | 0.34 | 2.50E-06 | 2.85E-05 |
| 6110 | 7 | F2-3 vs. S2-3 | 250433_at  | AT5G10400 |                                                                                                                                                                                                                                                                                                                                                                                                                                                                                                                                                                                                                                                                                             |         |         |      |          |          |
|      |   |               |            |           | Encodes a protein with predicted Ser/Thr kinase activity and membrane localization that is involved in the CLV3 signaling pathway that represses WUS expression in the meristem. Loss of function of CRN can suppress the phenotype caused by overexpression of CLV3. SOL2 isolated as a suppressor of root- specific overexpression of CLE19, a clavata3 like gene. sol2 partially suppresses the short root phenotype caused by CLE19 overexpression. Mutant flowers have extra carpels.                                                                                                                                                                                                  | 78.8    | 234.43  | 0.34 | 1.58E-04 | 5.54E-04 |
| 6111 | 7 | F2-3 vs. S2-3 | 250284_at  | AT5G13290 | early nodulin-like protein;(source:Araport11)                                                                                                                                                                                                                                                                                                                                                                                                                                                                                                                                                                                                                                               | 28.47   | 83.56   | 0.34 | 1.37E-04 | 4.93E-04 |
| 6112 | 7 | F2-3 vs. S2-3 | 246863_at  | AT5G25940 |                                                                                                                                                                                                                                                                                                                                                                                                                                                                                                                                                                                                                                                                                             |         |         |      |          |          |



|      |   |               |            |           |                                                                                                                                                                                                                                                                                                                                                                                                                                                                                                                                                                                                                                                                                                                                                                                                                                                                                                                                                                                                                                                                                                                                                                                                                                                                             |        |        |      |          |          |
|------|---|---------------|------------|-----------|-----------------------------------------------------------------------------------------------------------------------------------------------------------------------------------------------------------------------------------------------------------------------------------------------------------------------------------------------------------------------------------------------------------------------------------------------------------------------------------------------------------------------------------------------------------------------------------------------------------------------------------------------------------------------------------------------------------------------------------------------------------------------------------------------------------------------------------------------------------------------------------------------------------------------------------------------------------------------------------------------------------------------------------------------------------------------------------------------------------------------------------------------------------------------------------------------------------------------------------------------------------------------------|--------|--------|------|----------|----------|
| 6113 | 7 | F2-3 vs. S2-3 | 247904_at  | AT5G57390 | Encodes a member of the AP2 family of transcriptional regulators. May be involved in germination and seedling growth. Mutants are resistant to ABA analogs and are resistant to high nitrogen concentrations.essential for the developmental transition between the embryonic and vegetative phases in plants. Overexpression results in the formation of somatic embryos on cotyledons. It is also required to maintain high levels of PIN1 expression at the periphery of the meristem and modulate local auxin production in the central region of the SAM which underlies phyllotactic transitions. Acts redundantly with PLT3 and 7 in lateral root pattern formation.<br>SMC2-1 (SMC2)                                                                                                                                                                                                                                                                                                                                                                                                                                                                                                                                                                                | 26.06  | 77.7   | 0.34 | 6.60E-06 | 5.55E-05 |
| 6114 | 7 | F2-3 vs. S2-3 | 247482_at  | AT5G62410 |                                                                                                                                                                                                                                                                                                                                                                                                                                                                                                                                                                                                                                                                                                                                                                                                                                                                                                                                                                                                                                                                                                                                                                                                                                                                             | 48.39  | 143.85 | 0.34 | 1.14E-04 | 4.32E-04 |
| 6115 | 7 | F2-3 vs. S2-3 | 262109_at  | AT1G02730 | Encodes a gene similar to cellulose synthase. Knock-out mutant has reduced growth, reduced xylan level and reduced xylan synthase activity in stems.It's expression is cell cycle dependent and it appears to function in cell plate formation.<br>This gene is predicted to encode a bromodomain-containing protein. Plant lines expressing RNAi constructs targeted against GTE4 show some resistance to agrobacterium-mediated root transformation.                                                                                                                                                                                                                                                                                                                                                                                                                                                                                                                                                                                                                                                                                                                                                                                                                      | 80.76  | 241.75 | 0.33 | 2.90E-06 | 3.14E-05 |
| 6116 | 7 | F2-3 vs. S2-3 | 260787_at  | AT1G06230 | Ubiquinol-cytochrome C reductase hinge protein;(source:Araport11)                                                                                                                                                                                                                                                                                                                                                                                                                                                                                                                                                                                                                                                                                                                                                                                                                                                                                                                                                                                                                                                                                                                                                                                                           | 16.18  | 48.58  | 0.33 | 3.24E-04 | 9.47E-04 |
| 6117 | 7 | F2-3 vs. S2-3 | 262593_at  | AT1G15120 |                                                                                                                                                                                                                                                                                                                                                                                                                                                                                                                                                                                                                                                                                                                                                                                                                                                                                                                                                                                                                                                                                                                                                                                                                                                                             | 93.71  | 280.81 | 0.33 | 3.11E-05 | 1.67E-04 |
| 6118 | 7 | F2-3 vs. S2-3 | 256091_at  | AT1G20693 | Encodes a protein belonging to the subgroup of HMGB (high mobility group B) proteins that have a distinctive DNA-binding motif, the HMG-box domain. The motif confers non-sequence specific interaction with linear DNA and structure-specific binding to distorted DNA sites. The HMGB proteins are involved in the assembly of nucleoprotein complexes. Can be phosphorylated by CK2alpha. The mRNA is cell-to-cell mobile.<br>Peroxidase superfamily protein;(source:Araport11)<br>Nascent polypeptide-associated complex NAC;(source:Araport11)                                                                                                                                                                                                                                                                                                                                                                                                                                                                                                                                                                                                                                                                                                                         | 91.57  | 275.53 | 0.33 | 2.30E-06 | 2.69E-05 |
| 6119 | 7 | F2-3 vs. S2-3 | 261518_at  | AT1G71695 |                                                                                                                                                                                                                                                                                                                                                                                                                                                                                                                                                                                                                                                                                                                                                                                                                                                                                                                                                                                                                                                                                                                                                                                                                                                                             | 73.74  | 221.22 | 0.33 | 2.80E-06 | 3.09E-05 |
| 6120 | 7 | F2-3 vs. S2-3 | 260095_at  | AT1G73230 |                                                                                                                                                                                                                                                                                                                                                                                                                                                                                                                                                                                                                                                                                                                                                                                                                                                                                                                                                                                                                                                                                                                                                                                                                                                                             | 122.28 | 375.21 | 0.33 | 1.49E-05 | 9.94E-05 |
| 6121 | 7 | F2-3 vs. S2-3 | 259845_at  | AT1G73590 | Encodes an auxin efflux carrier involved in shoot and root development. It is involved in the maintenance of embryonic auxin gradients. Loss of function severely affects organ initiation, pin1 mutants are characterised by an inflorescence meristem that does not initiate any flowers, resulting in the formation of a naked inflorescence stem. PIN1 is involved in the determination of leaf shape by actively promoting development of leaf margin serrations. In roots, the protein mainly resides at the basal end of the vascular cells, but weak signals can be detected in the epidermis and the cortex. Expression levels and polarity of this auxin efflux carrier change during primordium development suggesting that cycles of auxin build-up and depletion accompany, and may direct, different stages of primordium development. PIN1 action on plant development does not strictly require function of PGP1 and PGP19 proteins.<br>Squamosa promoter-binding protein-like (SBP domain) transcription factor family protein;(source:Araport11)<br>Similar to the PSF1 component of GINS complex, which in other organism was shown to be involved in the initiation of DNA replication.<br>Proline-rich extensin-like family protein;(source:Araport11) | 31.35  | 96.42  | 0.33 | 4.26E-05 | 2.12E-04 |
| 6122 | 7 | F2-3 vs. S2-3 | 259971_at  | AT1G76580 |                                                                                                                                                                                                                                                                                                                                                                                                                                                                                                                                                                                                                                                                                                                                                                                                                                                                                                                                                                                                                                                                                                                                                                                                                                                                             | 60.95  | 184.47 | 0.33 | 3.50E-06 | 3.60E-05 |
| 6123 | 7 | F2-3 vs. S2-3 | 262043_at  | AT1G80190 |                                                                                                                                                                                                                                                                                                                                                                                                                                                                                                                                                                                                                                                                                                                                                                                                                                                                                                                                                                                                                                                                                                                                                                                                                                                                             | 56.21  | 170.34 | 0.33 | 7.00E-07 | 1.20E-05 |
| 6124 | 7 | F2-3 vs. S2-3 | 263552_x_a | AT2G24980 |                                                                                                                                                                                                                                                                                                                                                                                                                                                                                                                                                                                                                                                                                                                                                                                                                                                                                                                                                                                                                                                                                                                                                                                                                                                                             | 15.31  | 46.23  | 0.33 | 5.40E-06 | 4.85E-05 |
| 6125 | 7 | F2-3 vs. S2-3 | 265678_at  | AT2G31970 | Encodes the Arabidopsis RAD50 homologue. It is involved in double strand break repair. Component of the meiotic recombination complex that processes meiotic double-strand-breaks to produce single-stranded DNA ends, which act in the homology search and recombination.<br>Accumulates in the nucleus during meiotic prophase, a process regulated by PHS1. Dominant PHB mutations cause transformation of abaxial leaf fates into adaxial leaf fates. Encodes a member of HD-Zip family which contains homeodomain-leucine zipper domains and domain similar to a mammalian sterol binding domain. Has overlapping functions with PHAVOLUTA, REVOLUTA and CORONA.<br>Member of the MAP215 family of microtubule-associated proteins required to establish interphase arrays of cortical microtubules.Mutants have defects in cytokinesis during pollen development. Vegetative phenotypes observed in temperature sensitive mutants include left-handed organ twisting, isotropic cell expansion and impairment of root hair polarity. The mRNA is cell-to-cell mobile.                                                                                                                                                                                                 | 48.71  | 145.74 | 0.33 | 8.75E-05 | 3.54E-04 |
| 6126 | 7 | F2-3 vs. S2-3 | 267316_at  | AT2G34710 |                                                                                                                                                                                                                                                                                                                                                                                                                                                                                                                                                                                                                                                                                                                                                                                                                                                                                                                                                                                                                                                                                                                                                                                                                                                                             | 69.55  | 208.5  | 0.33 | 1.60E-06 | 2.10E-05 |
| 6127 | 7 | F2-3 vs. S2-3 | 265800_at  | AT2G35630 |                                                                                                                                                                                                                                                                                                                                                                                                                                                                                                                                                                                                                                                                                                                                                                                                                                                                                                                                                                                                                                                                                                                                                                                                                                                                             | 29.73  | 90.97  | 0.33 | 8.10E-06 | 6.48E-05 |

|      |   |               |                 |           |                                                                                                                                                                                                                                                                                                                                                                                                                                                                                                                                                                           |         |         |      |          |          |
|------|---|---------------|-----------------|-----------|---------------------------------------------------------------------------------------------------------------------------------------------------------------------------------------------------------------------------------------------------------------------------------------------------------------------------------------------------------------------------------------------------------------------------------------------------------------------------------------------------------------------------------------------------------------------------|---------|---------|------|----------|----------|
| 6128 | 7 | F2-3 vs. S2-3 | 266984_at       | AT2G39570 | Encodes a ACT domain-containing protein. The ACT domain, named after bacterial aspartate kinase, chorismate mutase and TyrA (prephenate dehydrogenase), is a regulatory domain that serves as an amino acid-binding site in feedback-regulated amino acid metabolic enzymes. Encodes a member of the PYR (pyrabactin resistance )/PYL(PYR1-like)/RCAR (regulatory components of ABA receptor) family proteins with 14 members. PYR/PYL/RCAR family proteins function as abscisic acid sensors. Mediate ABA-dependent regulation of protein phosphatase 2Cs ABI1 and ABI2. | 51.12   | 155.74  | 0.33 | 2.96E-04 | 8.84E-04 |
| 6129 | 7 | F2-3 vs. S2-3 | 263836_at       | AT2G40330 | Ribosomal protein L39 family protein;(source:Araport11)                                                                                                                                                                                                                                                                                                                                                                                                                                                                                                                   | 36.72   | 112.41  | 0.33 | 3.60E-06 | 3.67E-05 |
| 6130 | 7 | F2-3 vs. S2-3 | 259130_at       | AT3G02190 | Galactose mutarotase-like superfamily protein;(source:Araport11)                                                                                                                                                                                                                                                                                                                                                                                                                                                                                                          | 134.46  | 411.65  | 0.33 | 4.67E-05 | 2.26E-04 |
| 6131 | 7 | F2-3 vs. S2-3 | 258163_at       | AT3G17940 | peptidyl-prolyl cis-trans isomerase G;(source:Araport11)                                                                                                                                                                                                                                                                                                                                                                                                                                                                                                                  | 45.54   | 140.06  | 0.33 | 6.53E-05 | 2.84E-04 |
| 6132 | 7 | F2-3 vs. S2-3 | 252676_at       | AT3G44280 |                                                                                                                                                                                                                                                                                                                                                                                                                                                                                                                                                                           | 27.27   | 83.38   | 0.33 | 1.50E-05 | 9.94E-05 |
| 6133 | 7 | F2-3 vs. S2-3 | 254609_at       | AT4G18970 | GDSL-motif esterase/acyltransferase/lipase. Enzyme group with broad substrate specificity that may catalyze acyltransfer or hydrolase reactions with lipid and non-lipid substrates.                                                                                                                                                                                                                                                                                                                                                                                      | 79.44   | 242.65  | 0.33 | 3.82E-05 | 1.95E-04 |
| 6134 | 7 | F2-3 vs. S2-3 | 253133_at       | AT4G35800 | Encodes the unique largest subunit of nuclear DNA-dependent RNA polymerase II; the ortholog of budding yeast RPB1 and a homolog of the E. coli RNA polymerase beta prime subunit.                                                                                                                                                                                                                                                                                                                                                                                         | 13.73   | 41.25   | 0.33 | 9.30E-06 | 7.18E-05 |
| 6135 | 7 | F2-3 vs. S2-3 | 252912_at       | AT4G39200 | Ribosomal protein S25 family protein;(source:Araport11)                                                                                                                                                                                                                                                                                                                                                                                                                                                                                                                   | 165.41  | 505.68  | 0.33 | 2.20E-06 | 2.63E-05 |
| 6136 | 7 | F2-3 vs. S2-3 | 250305_at       | AT5G12150 | Encodes a protein with similarity to REN1, a Rho GTPase activating protein.It is cytoplasmic and plasma membrane associated in interphase, but during mitosis localizes to the CDZ/CDS in a POK-dependent manner.                                                                                                                                                                                                                                                                                                                                                         | 36.9    | 111.72  | 0.33 | 2.60E-06 | 2.94E-05 |
| 6137 | 7 | F2-3 vs. S2-3 | 246479_at       | AT5G16060 | Cytochrome c oxidase biogenesis protein Cmc1-like protein;(source:Araport11)                                                                                                                                                                                                                                                                                                                                                                                                                                                                                              | 22.06   | 66.96   | 0.33 | 1.40E-06 | 1.89E-05 |
| 6138 | 7 | F2-3 vs. S2-3 | 249901_at       | AT5G22650 | Encodes a member of a plant-specific class of histone deacetylases. Controls the development of adaxial/abaxial leaf polarity. Its mRNA is widely expressed in stems, leaves, flowers and young siliques. Plant lines expressing RNAi constructs directed against this gene showed a marked reduction in agrobacterium-mediated root transformation.                                                                                                                                                                                                                      | 168.63  | 511.01  | 0.33 | 3.90E-06 | 3.86E-05 |
| 6139 | 7 | F2-3 vs. S2-3 | 246882_at       | AT5G26180 | S-adenosyl-L-methionine-dependent methyltransferases superfamily protein;(source:Araport11)                                                                                                                                                                                                                                                                                                                                                                                                                                                                               | 36.74   | 112.82  | 0.33 | 3.12E-05 | 1.67E-04 |
| 6140 | 7 | F2-3 vs. S2-3 | 246730_at       | AT5G28060 | Ribosomal protein S24e family protein;(source:Araport11)                                                                                                                                                                                                                                                                                                                                                                                                                                                                                                                  | 20.02   | 61.31   | 0.33 | 8.20E-06 | 6.55E-05 |
| 6141 | 7 | F2-3 vs. S2-3 | 248767_at       | AT5G47710 | Calcium-dependent lipid-binding (CaLB domain) family protein;(source:Araport11)                                                                                                                                                                                                                                                                                                                                                                                                                                                                                           | 124.43  | 375.35  | 0.33 | 6.00E-07 | 1.10E-05 |
| 6142 | 7 | F2-3 vs. S2-3 | 247267_at       | AT5G64140 | Encodes a putative ribosomal protein S28.                                                                                                                                                                                                                                                                                                                                                                                                                                                                                                                                 | 49.02   | 150.21  | 0.33 | 4.50E-06 | 4.27E-05 |
| 6143 | 7 | F2-3 vs. S2-3 | 260660_at       | AT1G19485 | Transducin/WD40 repeat-like superfamily protein;(source:Araport11)                                                                                                                                                                                                                                                                                                                                                                                                                                                                                                        | 20.59   | 64.59   | 0.32 | 1.20E-04 | 4.46E-04 |
| 6144 | 7 | F2-3 vs. S2-3 | 262497_at       | AT1G21720 | 20S proteasome beta subunit PBC1 truncated protein (PBC1)                                                                                                                                                                                                                                                                                                                                                                                                                                                                                                                 | 142.87  | 442.46  | 0.32 | 7.10E-05 | 3.01E-04 |
| 6145 | 7 | F2-3 vs. S2-3 | 264446_at       | AT1G27310 | Encodes an ortholog of yeast NTF2, a nuclear envelop transport protein that functions as the nuclear import receptor for RanGDP, an essential player in nucleocytoplasmic transport.                                                                                                                                                                                                                                                                                                                                                                                      | 137.64  | 433.52  | 0.32 | 1.20E-06 | 1.75E-05 |
| 6146 | 7 | F2-3 vs. S2-3 | 261598_at       | AT1G49750 | Leucine-rich repeat (LRR) family protein;(source:Araport11)                                                                                                                                                                                                                                                                                                                                                                                                                                                                                                               | 28.1    | 86.92   | 0.32 | 1.75E-05 | 1.10E-04 |
| 6147 | 7 | F2-3 vs. S2-3 | 266001_at       | AT2G24150 | heptahelical transmembrane protein HHP3                                                                                                                                                                                                                                                                                                                                                                                                                                                                                                                                   | 38.03   | 120.64  | 0.32 | 8.40E-06 | 6.65E-05 |
| 6148 | 7 | F2-3 vs. S2-3 | 256438_s_a      | AT3G08520 | Ribosomal protein L41 family;(source:Araport11)                                                                                                                                                                                                                                                                                                                                                                                                                                                                                                                           | 1837.53 | 5685.77 | 0.32 | 4.13E-05 | 2.08E-04 |
| 6149 | 7 | F2-3 vs. S2-3 | 252601_s_a      | AT3G45030 | Ribosomal protein S10p/S20e family protein;(source:Araport11)                                                                                                                                                                                                                                                                                                                                                                                                                                                                                                             | 327.21  | 1037.19 | 0.32 | 1.40E-06 | 1.89E-05 |
| 6150 | 7 | F2-3 vs. S2-3 | 254054_at       | AT4G25320 | AT hook motif DNA-binding family protein;(source:Araport11)                                                                                                                                                                                                                                                                                                                                                                                                                                                                                                               | 34.31   | 107.2   | 0.32 | 7.35E-04 | 1.78E-03 |
| 6151 | 7 | F2-3 vs. S2-3 | 253340_s_a<br>t | AT4G33260 | Encodes a CDC20 protein that interacts with APC subunits, components of the mitochondrial checkpoint complex and mitotic cyclin substrates and is indispensable for normal plant development and fertility.                                                                                                                                                                                                                                                                                                                                                               | 227.93  | 712.72  | 0.32 | 1.90E-04 | 6.33E-04 |
| 6152 | 7 | F2-3 vs. S2-3 | 252883_at       | AT4G39520 | Encodes a member of the DRG (developmentally regulated G-protein) family. Has GTPase activity.                                                                                                                                                                                                                                                                                                                                                                                                                                                                            | 28.68   | 89.42   | 0.32 | 2.41E-04 | 7.52E-04 |
| 6153 | 7 | F2-3 vs. S2-3 | 245886_at       | AT5G09510 | Ribosomal protein S19 family protein;(source:Araport11)                                                                                                                                                                                                                                                                                                                                                                                                                                                                                                                   | 52.43   | 166.11  | 0.32 | 1.00E-06 | 1.54E-05 |
| 6154 | 7 | F2-3 vs. S2-3 | 250384_at       | AT5G11500 | coiled-coil protein;(source:Araport11)                                                                                                                                                                                                                                                                                                                                                                                                                                                                                                                                    | 188.77  | 589.52  | 0.32 | 4.40E-06 | 4.21E-05 |
| 6155 | 7 | F2-3 vs. S2-3 | 250228_at       | AT5G13840 | FIZZY-related 3;(source:Araport11)                                                                                                                                                                                                                                                                                                                                                                                                                                                                                                                                        | 58.45   | 183.5   | 0.32 | 2.80E-05 | 1.54E-04 |
| 6156 | 7 | F2-3 vs. S2-3 | 250015_at       | AT5G18070 | encodes a novel protein involved in DNA repair from UV damage. Isolated by functional complementation of E. coli UV-sensitive mutants (UVR genes).                                                                                                                                                                                                                                                                                                                                                                                                                        | 33.11   | 104.37  | 0.32 | 6.72E-05 | 2.89E-04 |
| 6157 | 7 | F2-3 vs. S2-3 | 246758_at       | AT5G27850 | Ribosomal protein L18e/L15 superfamily protein;(source:Araport11)                                                                                                                                                                                                                                                                                                                                                                                                                                                                                                         | 306.17  | 952.65  | 0.32 | 1.04E-05 | 7.72E-05 |
| 6158 | 7 | F2-3 vs. S2-3 | 249613_at       | AT5G37380 | Chaperone DnaJ-domain superfamily protein;(source:Araport11)                                                                                                                                                                                                                                                                                                                                                                                                                                                                                                              | 22.03   | 68.81   | 0.32 | 3.70E-06 | 3.73E-05 |
| 6159 | 7 | F2-3 vs. S2-3 | 249332_at       | AT5G40980 | AT.I.24-6 protein, putative (DUF 3339);(source:Araport11)                                                                                                                                                                                                                                                                                                                                                                                                                                                                                                                 | 24.95   | 78.89   | 0.32 | 3.20E-06 | 3.37E-05 |
| 6160 | 7 | F2-3 vs. S2-3 | 248478_at       | AT5G50870 | ubiquitin-conjugating enzyme 27;(source:Araport11)                                                                                                                                                                                                                                                                                                                                                                                                                                                                                                                        | 193.93  | 604.47  | 0.32 | 2.20E-06 | 2.63E-05 |
| 6161 | 7 | F2-3 vs. S2-3 | 247216_at       | AT5G64860 | Encodes a maltotriose-metabolizing enzyme with chloroplastic &#945;-1,4-glucanotransferase activity. Mutant has altered starch degradation.                                                                                                                                                                                                                                                                                                                                                                                                                               | 56.64   | 174.37  | 0.32 | 2.35E-04 | 7.40E-04 |

|      |   |               |            |           |                                                                                                                                                                                                                                                                                                                                                                                                                                                                                                                                                                                                                                                                                                                                                                                                                                                                                                                                                                   |        |         |      |          |          |
|------|---|---------------|------------|-----------|-------------------------------------------------------------------------------------------------------------------------------------------------------------------------------------------------------------------------------------------------------------------------------------------------------------------------------------------------------------------------------------------------------------------------------------------------------------------------------------------------------------------------------------------------------------------------------------------------------------------------------------------------------------------------------------------------------------------------------------------------------------------------------------------------------------------------------------------------------------------------------------------------------------------------------------------------------------------|--------|---------|------|----------|----------|
| 6162 | 7 | F2-3 vs. S2-3 | 262112_at  | AT1G02870 | nucleolar-like protein;(source:Araport11)                                                                                                                                                                                                                                                                                                                                                                                                                                                                                                                                                                                                                                                                                                                                                                                                                                                                                                                         | 16.24  | 52.35   | 0.31 | 6.60E-06 | 5.55E-05 |
| 6163 | 7 | F2-3 vs. S2-3 | 265037_at  | AT1G03860 | prohibitin 2                                                                                                                                                                                                                                                                                                                                                                                                                                                                                                                                                                                                                                                                                                                                                                                                                                                                                                                                                      | 41.73  | 136.82  | 0.31 | 3.58E-05 | 1.86E-04 |
| 6164 | 7 | F2-3 vs. S2-3 | 261418_at  | AT1G07830 | ribosomal protein L29 family protein;(source:Araport11)<br>Encodes a S-adenosyl-L-methionine:jasmonic acid carboxyl methyltransferase that catalyzes the formation of methyljasmonate from jasmonic acid. Its expression is induced in response to wounding or methyljasmonate treatment.                                                                                                                                                                                                                                                                                                                                                                                                                                                                                                                                                                                                                                                                         | 169.02 | 543.9   | 0.31 | 2.00E-06 | 2.46E-05 |
| 6165 | 7 | F2-3 vs. S2-3 | 261150_at  | AT1G19640 |                                                                                                                                                                                                                                                                                                                                                                                                                                                                                                                                                                                                                                                                                                                                                                                                                                                                                                                                                                   | 205.55 | 653.08  | 0.31 | 1.39E-04 | 4.97E-04 |
| 6166 | 7 | F2-3 vs. S2-3 | 262417_at  | AT1G50170 | encodes sirohdrochlorin ferrochelataase catalyzing the last step of the siroheme biosynthesis                                                                                                                                                                                                                                                                                                                                                                                                                                                                                                                                                                                                                                                                                                                                                                                                                                                                     | 62.79  | 204.77  | 0.31 | 1.55E-05 | 1.01E-04 |
| 6167 | 7 | F2-3 vs. S2-3 | 259612_at  | AT1G52300 | Zinc-binding ribosomal protein family protein;(source:Araport11)                                                                                                                                                                                                                                                                                                                                                                                                                                                                                                                                                                                                                                                                                                                                                                                                                                                                                                  | 687.09 | 2196.12 | 0.31 | 1.42E-05 | 9.57E-05 |
| 6168 | 7 | F2-3 vs. S2-3 | 259662_at  | AT1G55250 | Gene encodes one of two orthologous E3 ubiquitin ligases in Arabidopsis that are involved in monoubiquitination of histone H2B.rRegulates expression of disease resistance genes.                                                                                                                                                                                                                                                                                                                                                                                                                                                                                                                                                                                                                                                                                                                                                                                 | 28.03  | 91.33   | 0.31 | 5.02E-05 | 2.38E-04 |
| 6169 | 7 | F2-3 vs. S2-3 | 260297_at  | AT1G80280 | alpha/beta-Hydrolases superfamily protein;(source:Araport11)                                                                                                                                                                                                                                                                                                                                                                                                                                                                                                                                                                                                                                                                                                                                                                                                                                                                                                      | 60.93  | 196.05  | 0.31 | 2.90E-06 | 3.14E-05 |
| 6170 | 7 | F2-3 vs. S2-3 | 265873_at  | AT2G01630 | O-Glycosyl hydrolases family 17 protein;(source:Araport11)                                                                                                                                                                                                                                                                                                                                                                                                                                                                                                                                                                                                                                                                                                                                                                                                                                                                                                        | 35.73  | 114.8   | 0.31 | 2.90E-06 | 3.14E-05 |
| 6171 | 7 | F2-3 vs. S2-3 | 266150_s_a | AT2G12290 | hypothetical protein;(source:Araport11)                                                                                                                                                                                                                                                                                                                                                                                                                                                                                                                                                                                                                                                                                                                                                                                                                                                                                                                           | 27.16  | 88.43   | 0.31 | 2.06E-05 | 1.24E-04 |
| 6172 | 7 | F2-3 vs. S2-3 | 264056_at  | AT2G28510 | DOF transcription factor with a conserved zinc finger (ZF) DNA-binding domain.                                                                                                                                                                                                                                                                                                                                                                                                                                                                                                                                                                                                                                                                                                                                                                                                                                                                                    | 19.83  | 64.3    | 0.31 | 5.30E-06 | 4.80E-05 |
| 6173 | 7 | F2-3 vs. S2-3 | 267641_at  | AT2G32940 | Encodes a nuclear localized 879-amino-acid protein that contains conserved PAZ and PIWI domains that is important for the accumulation of specific heterochromatin-related siRNAs, and for DNA methylation and transcriptional gene silencing.                                                                                                                                                                                                                                                                                                                                                                                                                                                                                                                                                                                                                                                                                                                    | 49.81  | 163.3   | 0.31 | 4.10E-06 | 4.02E-05 |
| 6174 | 7 | F2-3 vs. S2-3 | 263868_at  | AT2G36840 | Encodes a ACT domain-containing protein. The ACT domain, named after bacterial aspartate kinase, chorismate mutase and TyrA (prephenate dehydrogenase), is a regulatory domain that serves as an amino acid-binding site in feedback-regulated amino acid metabolic enzymes.                                                                                                                                                                                                                                                                                                                                                                                                                                                                                                                                                                                                                                                                                      | 13.38  | 42.66   | 0.31 | 6.03E-05 | 2.70E-04 |
| 6175 | 7 | F2-3 vs. S2-3 | 258995_at  | AT3G01790 | Ribosomal protein L13 family protein;(source:Araport11)                                                                                                                                                                                                                                                                                                                                                                                                                                                                                                                                                                                                                                                                                                                                                                                                                                                                                                           | 102.22 | 325.93  | 0.31 | 9.60E-06 | 7.35E-05 |
| 6176 | 7 | F2-3 vs. S2-3 | 258858_at  | AT3G02080 | Ribosomal protein S19e family protein;(source:Araport11)                                                                                                                                                                                                                                                                                                                                                                                                                                                                                                                                                                                                                                                                                                                                                                                                                                                                                                          | 202.08 | 658.7   | 0.31 | 1.80E-06 | 2.29E-05 |
| 6177 | 7 | F2-3 vs. S2-3 | 258480_at  | AT3G02640 | transmembrane protein;(source:Araport11)                                                                                                                                                                                                                                                                                                                                                                                                                                                                                                                                                                                                                                                                                                                                                                                                                                                                                                                          | 66.3   | 216.89  | 0.31 | 3.10E-04 | 9.14E-04 |
| 6178 | 7 | F2-3 vs. S2-3 | 258846_at  | AT3G03070 | NADH-ubiquinone oxidoreductase-like protein;(source:Araport11)                                                                                                                                                                                                                                                                                                                                                                                                                                                                                                                                                                                                                                                                                                                                                                                                                                                                                                    | 14.21  | 46.55   | 0.31 | 6.30E-06 | 5.36E-05 |
| 6179 | 7 | F2-3 vs. S2-3 | 258709_at  | AT3G09500 | Ribosomal L29 family protein;(source:Araport11)                                                                                                                                                                                                                                                                                                                                                                                                                                                                                                                                                                                                                                                                                                                                                                                                                                                                                                                   | 270.18 | 867.28  | 0.31 | 1.13E-04 | 4.28E-04 |
| 6180 | 7 | F2-3 vs. S2-3 | 258728_at  | AT3G11800 | Expp1 protein;(source:Araport11)                                                                                                                                                                                                                                                                                                                                                                                                                                                                                                                                                                                                                                                                                                                                                                                                                                                                                                                                  | 71.81  | 230.52  | 0.31 | 4.00E-07 | 8.26E-06 |
| 6181 | 7 | F2-3 vs. S2-3 | 258166_at  | AT3G21540 | transducin family protein / WD-40 repeat family protein;(source:Araport11)<br>Encodes MAD2 (MITOTIC ARREST-DEFICIENT 2). May have the spindle assembly checkpoint protein functions conserved from yeast to humans.                                                                                                                                                                                                                                                                                                                                                                                                                                                                                                                                                                                                                                                                                                                                               | 18.35  | 58.85   | 0.31 | 1.88E-05 | 1.16E-04 |
| 6182 | 7 | F2-3 vs. S2-3 | 258067_at  | AT3G25980 | Mitochondrial F1F0-ATP synthase.                                                                                                                                                                                                                                                                                                                                                                                                                                                                                                                                                                                                                                                                                                                                                                                                                                                                                                                                  | 25.48  | 81.76   | 0.31 | 6.60E-06 | 5.55E-05 |
| 6183 | 7 | F2-3 vs. S2-3 | 252524_at  | AT3G46430 | Ribosomal L27e protein family;(source:Araport11)                                                                                                                                                                                                                                                                                                                                                                                                                                                                                                                                                                                                                                                                                                                                                                                                                                                                                                                  | 200.08 | 642.92  | 0.31 | 3.30E-06 | 3.44E-05 |
| 6184 | 7 | F2-3 vs. S2-3 | 245372_at  | AT4G15000 | SKU5 similar 4;(source:Araport11)                                                                                                                                                                                                                                                                                                                                                                                                                                                                                                                                                                                                                                                                                                                                                                                                                                                                                                                                 | 499.86 | 1610.82 | 0.31 | 5.00E-07 | 9.67E-06 |
| 6185 | 7 | F2-3 vs. S2-3 | 254363_at  | AT4G22010 | Ribosomal S17 family protein;(source:Araport11)                                                                                                                                                                                                                                                                                                                                                                                                                                                                                                                                                                                                                                                                                                                                                                                                                                                                                                                   | 121.74 | 394.7   | 0.31 | 1.60E-06 | 2.10E-05 |
| 6186 | 7 | F2-3 vs. S2-3 | 250862_s_a | AT5G04800 |                                                                                                                                                                                                                                                                                                                                                                                                                                                                                                                                                                                                                                                                                                                                                                                                                                                                                                                                                                   | 645.55 | 2058.99 | 0.31 | 9.00E-07 | 1.44E-05 |
| 6187 | 7 | F2-3 vs. S2-3 | 250752_at  | AT5G05690 | Encodes a member of the CP90A family, a cytochrome P450 monooxygenase which converts 6-deoxocathasterone to 6-deoxoteasterone in the late C6 oxidation pathway and cathasterone to teasterone in the early C6 oxidation pathway of brassinolide biosynthesis. Expressed in cotyledons and leaves. Mutants display de-etiolation and derepression of light-induced genes in the dark, dwarfism, male sterility and activation of stress-regulated genes in the light. The expression of the gene using a CPD promoter:LUC fusion construct was shown to be under circadian and light control. Additionally, the circadian regulation was shown to be independent of BR levels as it remains unchanged in <i>br1</i> mutant lines. CPD appears to be involved in the autonomous pathway that regulates the transition to flowering, primarily through a BRI1-mediated signaling pathway that affects FLC expression levels, as uncovered by double mutant analyses. | 108    | 343.06  | 0.31 | 2.03E-04 | 6.70E-04 |
| 6188 | 7 | F2-3 vs. S2-3 | 250150_at  | AT5G14710 | proteasome assembly chaperone-like protein;(source:Araport11)                                                                                                                                                                                                                                                                                                                                                                                                                                                                                                                                                                                                                                                                                                                                                                                                                                                                                                     | 65.7   | 209.55  | 0.31 | 3.80E-06 | 3.79E-05 |
| 6189 | 7 | F2-3 vs. S2-3 | 250080_at  | AT5G16620 | chloroplast protein import (Tic40)                                                                                                                                                                                                                                                                                                                                                                                                                                                                                                                                                                                                                                                                                                                                                                                                                                                                                                                                | 185.65 | 606.04  | 0.31 | 2.53E-05 | 1.44E-04 |
| 6190 | 7 | F2-3 vs. S2-3 | 246885_at  | AT5G26230 | Encodes a member of the MAKR (MEMBRANE-ASSOCIATED KINASE REGULATOR) gene family. MAKRs have putative kinase interacting motifs and membrane localization signals. Known members include: AT5G26230 (MAKR1), AT1G64080 (MAKR2), AT2G37380 (MAKR3), AT2G39370 (MAKR4), AT5G52870 (MAKR5) and AT5G52900 (MAKR6).                                                                                                                                                                                                                                                                                                                                                                                                                                                                                                                                                                                                                                                     | 16.15  | 51.41   | 0.31 | 4.75E-05 | 2.28E-04 |
| 6191 | 7 | F2-3 vs. S2-3 | 248465_at  | AT5G51200 | nuclear pore complex protein (DUF3414);(source:Araport11)                                                                                                                                                                                                                                                                                                                                                                                                                                                                                                                                                                                                                                                                                                                                                                                                                                                                                                         | 51.89  | 169.57  | 0.31 | 1.78E-04 | 6.02E-04 |

|      |   |               |            |           |                                                                                                                                                                                                                                                                                                                                                                                                                                                                                                                                                                                                          |         |         |      |          |          |
|------|---|---------------|------------|-----------|----------------------------------------------------------------------------------------------------------------------------------------------------------------------------------------------------------------------------------------------------------------------------------------------------------------------------------------------------------------------------------------------------------------------------------------------------------------------------------------------------------------------------------------------------------------------------------------------------------|---------|---------|------|----------|----------|
| 6192 | 7 | F2-3 vs. S2-3 | 247213_at  | AT5G64900 | Encodes a putative 92-aa protein that is the precursor of AtPep1, a 23-aa peptide which activates transcription of the defensive gene defensin (PDF1.2) and activates the synthesis of H2O2, both being components of the innate immune response.                                                                                                                                                                                                                                                                                                                                                        | 27.61   | 90.23   | 0.31 | 6.00E-07 | 1.10E-05 |
| 6193 | 7 | F2-3 vs. S2-3 | 244993_s_a | ATCG01130 | Ycf1 protein;(source:Araport11)                                                                                                                                                                                                                                                                                                                                                                                                                                                                                                                                                                          | 718.87  | 2349.95 | 0.31 | 7.70E-06 | 6.20E-05 |
| 6194 | 7 | F2-3 vs. S2-3 | 264679_s_a | AT1G09690 | Translation protein SH3-like family protein;(source:Araport11)                                                                                                                                                                                                                                                                                                                                                                                                                                                                                                                                           | 2238.87 | 7573    | 0.3  | 2.00E-06 | 2.46E-05 |
| 6195 | 7 | F2-3 vs. S2-3 | 255767_at  | AT1G16740 | Ribosomal protein L20;(source:Araport11)                                                                                                                                                                                                                                                                                                                                                                                                                                                                                                                                                                 | 282.59  | 943.58  | 0.3  | 3.60E-06 | 3.67E-05 |
| 6196 | 7 | F2-3 vs. S2-3 | 256112_at  | AT1G16920 | small GTP-binding protein (Rab11)similar to YPT3/RAB11 proteins in yeast and mammals, respectively. YPT3/RAB11 is involved in intracellular protein trafficking.                                                                                                                                                                                                                                                                                                                                                                                                                                         | 454.99  | 1517.04 | 0.3  | 2.00E-06 | 2.46E-05 |
| 6197 | 7 | F2-3 vs. S2-3 | 262802_at  | AT1G20930 | Cyclin-dependent kinase, expressed in flowers and suspension cell culture, expression peaks during M phase in synchronized cultures. Required for proper organization of the shoot apical meristem and for hormone signaling. Expressed in the shoot apical meristem. Involved in regulation of the G2/M transition of the mitotic cell cycle.                                                                                                                                                                                                                                                           | 39.45   | 133.66  | 0.3  | 7.08E-05 | 3.01E-04 |
| 6198 | 7 | F2-3 vs. S2-3 | 262985_s_a | AT1G23290 | Encodes a ribosomal protein L27A, a constituent of the large subunit of the ribosomal complex. Regulated by TCP20. The mRNA is cell-to-cell mobile. Predicted to encode a PK (pathogenesis-related) protein. Belongs to the plant defensin (PDF) family with the following members: At1g75830/PDF1.1, At5g44420/PDF1.2a, At2g26020/PDF1.2b, At5g44430/PDF1.2c, At2g26010/PDF1.3, At1g19610/PDF1.4, At1g55010/PDF1.5, At2g02120/PDF2.1, At2g02100/PDF2.2, At2g02130/PDF2.3, At1g61070/PDF2.4, At5g63660/PDF2.5, At2g02140/PDF2.6, At5g38330/PDF3.1 and At4g30070/PDF3.2. The mRNA is cell-to-cell mobile. | 1541.87 | 5099.37 | 0.3  | 2.00E-06 | 2.46E-05 |
| 6199 | 7 | F2-3 vs. S2-3 | 266118_at  | AT2G02130 | Ribosomal protein L14p/L23e family protein;(source:Araport11)                                                                                                                                                                                                                                                                                                                                                                                                                                                                                                                                            | 50.18   | 166.58  | 0.3  | 1.90E-06 | 2.37E-05 |
| 6200 | 7 | F2-3 vs. S2-3 | 255789_at  | AT2G33370 | aluminum induced protein with YGL and LRDR motifs;(source:Araport11)                                                                                                                                                                                                                                                                                                                                                                                                                                                                                                                                     | 321.93  | 1067.58 | 0.3  | 1.40E-06 | 1.89E-05 |
| 6201 | 7 | F2-3 vs. S2-3 | 258402_at  | AT3G15450 | plant/protein;(source:Araport11)                                                                                                                                                                                                                                                                                                                                                                                                                                                                                                                                                                         | 14.54   | 48.62   | 0.3  | 6.13E-05 | 2.72E-04 |
| 6202 | 7 | F2-3 vs. S2-3 | 258225_at  | AT3G15630 | Member of IQ67 (CaM binding) domain containing family.                                                                                                                                                                                                                                                                                                                                                                                                                                                                                                                                                   | 13.44   | 45.03   | 0.3  | 1.17E-05 | 8.37E-05 |
| 6203 | 7 | F2-3 vs. S2-3 | 255642_at  | AT4G00820 | CAAX protease with broad substrate specificity. Localized exclusively to the endoplasmic reticulum.                                                                                                                                                                                                                                                                                                                                                                                                                                                                                                      | 12.19   | 41.03   | 0.3  | 5.00E-06 | 4.58E-05 |
| 6204 | 7 | F2-3 vs. S2-3 | 255569_at  | AT4G01320 | secE/sec61-gamma protein transport protein;(source:Araport11)                                                                                                                                                                                                                                                                                                                                                                                                                                                                                                                                            | 270     | 898.8   | 0.3  | 8.00E-07 | 1.32E-05 |
| 6205 | 7 | F2-3 vs. S2-3 | 254083_at  | AT4G24920 | Low temperature and salt responsive protein family;(source:Araport11)                                                                                                                                                                                                                                                                                                                                                                                                                                                                                                                                    | 236.68  | 783.15  | 0.3  | 7.00E-07 | 1.20E-05 |
| 6206 | 7 | F2-3 vs. S2-3 | 253627_at  | AT4G30650 | maternal effect embryo arrest 59;(source:Araport11)                                                                                                                                                                                                                                                                                                                                                                                                                                                                                                                                                      | 64.05   | 216.57  | 0.3  | 2.90E-06 | 3.14E-05 |
| 6207 | 7 | F2-3 vs. S2-3 | 253049_at  | AT4G37300 | Contains lipase signature motif and GDSL domain.                                                                                                                                                                                                                                                                                                                                                                                                                                                                                                                                                         | 19.55   | 64.79   | 0.3  | 1.72E-05 | 1.09E-04 |
| 6208 | 7 | F2-3 vs. S2-3 | 246526_at  | AT5G15720 | DNA repair protein Rad4 family;(source:Araport11)                                                                                                                                                                                                                                                                                                                                                                                                                                                                                                                                                        | 45.61   | 151.65  | 0.3  | 2.44E-05 | 1.40E-04 |
| 6209 | 7 | F2-3 vs. S2-3 | 250105_at  | AT5G16630 | prefoldin 5;(source:Araport11)                                                                                                                                                                                                                                                                                                                                                                                                                                                                                                                                                                           | 74      | 243.81  | 0.3  | 3.10E-06 | 3.28E-05 |
| 6210 | 7 | F2-3 vs. S2-3 | 249829_at  | AT5G23290 | Ribosomal L5P family protein;(source:Araport11)                                                                                                                                                                                                                                                                                                                                                                                                                                                                                                                                                          | 96.85   | 326.43  | 0.3  | 1.90E-06 | 2.37E-05 |
| 6211 | 7 | F2-3 vs. S2-3 | 254617_s_a | AT5G45775 | Encodes a sucrose synthase (SUS2). The activity of the enzyme could not be assayed as proved to be insoluble (PMID 17257168). However, analyses of an sus2 mutant revealed a deficiency in sucrose synthase activity 12 and 15 days after flowering. There are some reports that SUS2 transcript levels are increased in leaves specifically by O(2) deficiency whereas other reports indicate that SUS2 is expressed only in seeds. Immunolocalization shows that SUS2 is present in the cytosol of developing seeds, but, it also associated with plastids, though not located within them.            | 764.05  | 2553.43 | 0.3  | 6.62E-05 | 2.87E-04 |
| 6212 | 7 | F2-3 vs. S2-3 | 248647_at  | AT5G49190 | Wound-responsive gene 3 (WR3). Encodes a high-affinity nitrate transporter. Up-regulated by nitrate. Involved in jasmonic acid-independent wound signal transduction.                                                                                                                                                                                                                                                                                                                                                                                                                                    | 28.85   | 95.78   | 0.3  | 2.80E-05 | 1.54E-04 |
| 6213 | 7 | F2-3 vs. S2-3 | 248551_at  | AT5G50200 | Encodes subunit I of photosystem I.                                                                                                                                                                                                                                                                                                                                                                                                                                                                                                                                                                      | 16.27   | 54.89   | 0.3  | 8.19E-04 | 1.94E-03 |
| 6214 | 7 | F2-3 vs. S2-3 | 245017_at  | ATCG00510 | PIN domain-like family protein;(source:Araport11)                                                                                                                                                                                                                                                                                                                                                                                                                                                                                                                                                        | 396.76  | 1340.74 | 0.3  | 3.68E-04 | 1.05E-03 |
| 6215 | 7 | F2-3 vs. S2-3 | 261001_at  | AT1G26530 | Part of multi-protein complex, acting as guanine nucleotide exchange factors (GEFs) and possibly as tethers, regulating intracellular trafficking.                                                                                                                                                                                                                                                                                                                                                                                                                                                       | 17.31   | 60.03   | 0.29 | 1.26E-04 | 4.63E-04 |
| 6216 | 7 | F2-3 vs. S2-3 | 265386_at  | AT2G20930 | RPL24B encodes ribosomal protein L24, homolog of cytosolic RPL24, found in archaea and higher eukaryotes. Arabidopsis has two RPL24 homologs, RPL24A (AT2G36620) and RPL24B. Mutants showed defects in apical-basal gynoecium patterning similar to previously described ett and mp mutants. Transformation of stv1-1 mutant with a uORF-eliminated ETT construct partially suppressed the stv1 gynoecium phenotype, implying that STV1 could influence ETT translation through its uORFs. Regulated by TCP20.                                                                                           | 28.93   | 100.83  | 0.29 | 1.70E-06 | 2.21E-05 |
| 6217 | 7 | F2-3 vs. S2-3 | 251997_at  | AT3G53020 |                                                                                                                                                                                                                                                                                                                                                                                                                                                                                                                                                                                                          | 594.43  | 2018.22 | 0.29 | 1.20E-06 | 1.75E-05 |

|      |   |               |            |           |                                                                                                                                                                                                                                                                                                                                                                                                                                                                                         |        |         |      |          |          |
|------|---|---------------|------------|-----------|-----------------------------------------------------------------------------------------------------------------------------------------------------------------------------------------------------------------------------------------------------------------------------------------------------------------------------------------------------------------------------------------------------------------------------------------------------------------------------------------|--------|---------|------|----------|----------|
| 6218 | 7 | F2-3 vs. S2-3 | 251735_at  | AT3G56090 | Encodes FERRITIN 3, AtFER3. Ferritins are a class of 24-mer multi-meric proteins found in all kingdoms of life. Function as the main iron store in mammals. Evidence suggests that Arabidopsis ferritins are essential to protect cells against oxidative damage, but they do not constitute the major iron pool.                                                                                                                                                                       | 80.8   | 276.12  | 0.29 | 9.70E-06 | 7.40E-05 |
| 6219 | 7 | F2-3 vs. S2-3 | 251737_at  | AT3G56340 | Small ribosomal subunit protein. Non-catalytic subunit unique to Nuclear DNA-dependent RNA polymerase V; homologous to budding yeast RPB5.                                                                                                                                                                                                                                                                                                                                              | 479.41 | 1679.67 | 0.29 | 5.60E-06 | 4.97E-05 |
| 6220 | 7 | F2-3 vs. S2-3 | 251662_at  | AT3G57080 | Encodes a class II HD-ZIP protein that regulates meristematic activity in different tissues, and that it is necessary for the correct formation of the gynoecium.                                                                                                                                                                                                                                                                                                                       | 14.03  | 48.61   | 0.29 | 4.00E-07 | 8.26E-06 |
| 6221 | 7 | F2-3 vs. S2-3 | 245362_at  | AT4G17460 | A member of ROP GTPase gene family; Encodes a Rho-like GTP binding protein.                                                                                                                                                                                                                                                                                                                                                                                                             | 66.44  | 227.57  | 0.29 | 4.90E-06 | 4.55E-05 |
| 6222 | 7 | F2-3 vs. S2-3 | 253225_at  | AT4G35020 | Stress responsive A/B Barrel Domain-containing protein;(source:Araport11)                                                                                                                                                                                                                                                                                                                                                                                                               | 90.24  | 313.15  | 0.29 | 1.30E-06 | 1.81E-05 |
| 6223 | 7 | F2-3 vs. S2-3 | 249894_at  | AT5G22580 | protein synthesis initiation factor eIF2 gamma The mRNA is cell-to-cell mobile.                                                                                                                                                                                                                                                                                                                                                                                                         | 806.24 | 2792.81 | 0.29 | 5.25E-04 | 1.38E-03 |
| 6224 | 7 | F2-3 vs. S2-3 | 264327_at  | AT1G04170 | basic helix-loop-helix (bHLH) DNA-binding superfamily protein;(source:Araport11)                                                                                                                                                                                                                                                                                                                                                                                                        | 14.33  | 51.84   | 0.28 | 2.78E-05 | 1.53E-04 |
| 6225 | 7 | F2-3 vs. S2-3 | 261254_at  | AT1G05805 | hypothetical protein;(source:Araport11)                                                                                                                                                                                                                                                                                                                                                                                                                                                 | 14.25  | 51.77   | 0.28 | 1.98E-05 | 1.20E-04 |
| 6226 | 7 | F2-3 vs. S2-3 | 261738_s_a | AT1G47813 | Thioredoxin superfamily protein;(source:Araport11)                                                                                                                                                                                                                                                                                                                                                                                                                                      | 57.67  | 202.83  | 0.28 | 3.00E-07 | 6.68E-06 |
| 6227 | 7 | F2-3 vs. S2-3 | 263488_at  | AT2G31840 | Histone superfamily protein;(source:Araport11)                                                                                                                                                                                                                                                                                                                                                                                                                                          | 30.03  | 107.67  | 0.28 | 5.00E-06 | 4.58E-05 |
| 6228 | 7 | F2-3 vs. S2-3 | 265960_at  | AT2G37470 | Ribosomal protein S26e family protein;(source:Araport11)                                                                                                                                                                                                                                                                                                                                                                                                                                | 18.56  | 67.29   | 0.28 | 1.23E-05 | 8.61E-05 |
| 6229 | 7 | F2-3 vs. S2-3 | 255819_s_a | AT2G40510 | LUC7 related protein;(source:Araport11)                                                                                                                                                                                                                                                                                                                                                                                                                                                 | 14.73  | 51.86   | 0.28 | 5.40E-06 | 4.85E-05 |
| 6230 | 7 | F2-3 vs. S2-3 | 259055_at  | AT3G03340 | Encodes a histone 2B (H2B) protein. This protein can be ubiquitinated in planta, and this modification depends on the HUB1 and HUB2 E3 ubiquitin ligases as well as the UBC1 and UBC2 E2 ubiquitin conjugating enzymes. Lysine 146 appears to be the site of the ubiquitin addition.                                                                                                                                                                                                    | 170.9  | 609.82  | 0.28 | 1.40E-06 | 1.89E-05 |
| 6231 | 7 | F2-3 vs. S2-3 | 252561_at  | AT3G45980 | Encodes a histone H3K4 demethylase repressing floral transition.Coordinates and structure features have been deposited in the RCSB Protein Data Bank with the accession codes 5YKN (JM14CD) and 5YKO(JM14CD-NOG-H3K4em3 complex). Glu285 and Glu516 contribute to the recognition of H3R2. Asp312 contributes to the recognition of H3Q5. Phe171 and Val363 contribute to the recognition of H3A7. Ser290, Trp296, and Tyr298 contribute to the recognition of H3K4me3 (PMID:29233856). | 29.74  | 106.19  | 0.28 | 1.22E-05 | 8.58E-05 |
| 6232 | 7 | F2-3 vs. S2-3 | 254464_at  | AT4G20400 | Cyclin-dependent protein kinase CYCB1;1. Functions as an effector of growth control at G2/M.                                                                                                                                                                                                                                                                                                                                                                                            | 27.84  | 99.37   | 0.28 | 1.90E-06 | 2.37E-05 |
| 6233 | 7 | F2-3 vs. S2-3 | 253051_at  | AT4G37490 | Regulated by TCP20. Non-catalytic subunit specific to DNA-dependent RNA polymerase II; the ortholog of budding yeast RPB4)                                                                                                                                                                                                                                                                                                                                                              | 34.2   | 121.06  | 0.28 | 2.70E-06 | 3.02E-05 |
| 6234 | 7 | F2-3 vs. S2-3 | 250510_at  | AT5G09920 | Histone superfamily protein;(source:Araport11)                                                                                                                                                                                                                                                                                                                                                                                                                                          | 79.22  | 285.71  | 0.28 | 1.08E-05 | 7.97E-05 |
| 6235 | 7 | F2-3 vs. S2-3 | 250434_at  | AT5G10390 | SOH1 family protein;(source:Araport11)                                                                                                                                                                                                                                                                                                                                                                                                                                                  | 57.98  | 208.59  | 0.28 | 1.48E-05 | 9.91E-05 |
| 6236 | 7 | F2-3 vs. S2-3 | 246140_at  | AT5G19910 | Encodes a substrate receptor for CRL4-CDD complexes that provides substrate specificity for CRL4 by interacting with ubiquitination targets. By its interaction and regulation of levels of PYL8 through proteasomal degradation, it negatively regulates ABA-mediated developmental responses, including inhibition of seed germination, seedling establishment, and root growth                                                                                                       | 19.33  | 69.03   | 0.28 | 8.30E-06 | 6.60E-05 |
| 6237 | 7 | F2-3 vs. S2-3 | 249313_at  | AT5G41560 | methyl-coenzyme M reductase II subunit gamma, putative (DUF3741);(source:Araport11)                                                                                                                                                                                                                                                                                                                                                                                                     | 13.63  | 49.33   | 0.28 | 1.30E-06 | 1.81E-05 |
| 6238 | 7 | F2-3 vs. S2-3 | 249093_at  | AT5G43880 | basic leucine zipper/W2 domain protein;(source:Araport11)                                                                                                                                                                                                                                                                                                                                                                                                                               | 18.66  | 65.8    | 0.28 | 4.27E-05 | 2.12E-04 |
| 6239 | 7 | F2-3 vs. S2-3 | 260946_at  | AT1G06010 | zinc finger/BTB domain protein;(source:Araport11)                                                                                                                                                                                                                                                                                                                                                                                                                                       | 17.38  | 64.86   | 0.27 | 1.00E-06 | 1.54E-05 |
| 6240 | 7 | F2-3 vs. S2-3 | 262000_at  | AT1G33810 | 10-formyltetrahydrofolate synthetase (THFS) mRNA, complete The mRNA is cell-to-cell mobile.                                                                                                                                                                                                                                                                                                                                                                                             | 54.59  | 205.75  | 0.27 | 5.00E-07 | 9.67E-06 |
| 6241 | 7 | F2-3 vs. S2-3 | 261864_s_a | AT1G50480 | Encodes an ESCRT-related protein: CHMP1A/AT1G73030; CHMP1B/AT1G17730. CHMP1A and B mediate multivesicular body sorting of auxin carriers and are required for plant development. ESCRT: Endosomal Sorting Complexes Required For Transport machinery; CHMP: Charged Multivesicular Body Protein/Chromatin Modifying Protein.                                                                                                                                                            | 373.22 | 1361.47 | 0.27 | 2.25E-05 | 1.32E-04 |
| 6242 | 7 | F2-3 vs. S2-3 | 262367_at  | AT1G73030 | Ribosomal protein L36e family protein;(source:Araport11)                                                                                                                                                                                                                                                                                                                                                                                                                                | 86.95  | 322.14  | 0.27 | 1.61E-05 | 1.04E-04 |
| 6243 | 7 | F2-3 vs. S2-3 | 267174_at  | AT2G37600 | Encodes a clathrin that is localized to the cortical division zone and the cell plate and colocalizes with TPLATE during cell plate anchoring. The mRNA is cell-to-cell mobile.                                                                                                                                                                                                                                                                                                         | 67.3   | 249.65  | 0.27 | 9.24E-04 | 2.14E-03 |
| 6244 | 7 | F2-3 vs. S2-3 | 267360_at  | AT2G40060 | Ribosomal protein L7Ae/L30e/S12e/Gadd45 family protein;(source:Araport11)                                                                                                                                                                                                                                                                                                                                                                                                               | 180.1  | 665.83  | 0.27 | 2.00E-07 | 4.97E-06 |
| 6245 | 7 | F2-3 vs. S2-3 | 254831_at  | AT4G12600 |                                                                                                                                                                                                                                                                                                                                                                                                                                                                                         | 46.95  | 175.17  | 0.27 | 2.47E-05 | 1.42E-04 |

|      |   |               |            |           |                                                                                                                                                                                                                                                                                                                                                                                                                                                                                      |         |         |      |          |          |
|------|---|---------------|------------|-----------|--------------------------------------------------------------------------------------------------------------------------------------------------------------------------------------------------------------------------------------------------------------------------------------------------------------------------------------------------------------------------------------------------------------------------------------------------------------------------------------|---------|---------|------|----------|----------|
| 6246 | 7 | F2-3 vs. S2-3 | 246090_at  | AT5G20520 | Encodes a Bem46-like protein. WAV2 negatively regulates root bending when roots alter their growth direction. It's not involved in sensing environmental stimuli (e.g. gravity, light, water, touch).                                                                                                                                                                                                                                                                                | 71.37   | 263.31  | 0.27 | 5.70E-06 | 5.00E-05 |
| 6247 | 7 | F2-3 vs. S2-3 | 249492_at  | AT5G39160 | RmlC-like cupins superfamily protein;(source:Araport11)                                                                                                                                                                                                                                                                                                                                                                                                                              | 9.17    | 34.02   | 0.27 | 1.20E-06 | 1.75E-05 |
| 6248 | 7 | F2-3 vs. S2-3 | 249060_at  | AT5G44560 | SNF7 family protein;(source:Araport11)                                                                                                                                                                                                                                                                                                                                                                                                                                               | 45.27   | 166.2   | 0.27 | 8.00E-06 | 6.40E-05 |
|      |   |               | 244987_s_a |           | encodes a chloroplast ribosomal protein L2, a constituent of the large subunit of the ribosomal complex                                                                                                                                                                                                                                                                                                                                                                              |         |         |      |          |          |
| 6249 | 7 | F2-3 vs. S2-3 | t          | ATCG00830 |                                                                                                                                                                                                                                                                                                                                                                                                                                                                                      | 1697.38 | 6288.43 | 0.27 | 6.40E-06 | 5.42E-05 |
| 6250 | 7 | F2-3 vs. S2-3 | 255902_at  | AT1G17880 | basic transcription factor 3;(source:Araport11)                                                                                                                                                                                                                                                                                                                                                                                                                                      | 145.98  | 560.55  | 0.26 | 4.90E-06 | 4.55E-05 |
|      |   |               |            |           | PCP2 encodes a novel plant specific protein that is co-expressed with components of pre-rRNA processing complex. Co-localizes with NuGWD1 and SWA1.                                                                                                                                                                                                                                                                                                                                  | 16.95   | 66.33   | 0.26 | 3.05E-04 | 9.05E-04 |
| 6251 | 7 | F2-3 vs. S2-3 | 261377_at  | AT1G18850 | dormancy-associated protein (DRM1)                                                                                                                                                                                                                                                                                                                                                                                                                                                   | 20.7    | 80.29   | 0.26 | 1.00E-06 | 1.54E-05 |
| 6252 | 7 | F2-3 vs. S2-3 | 245668_at  | AT1G28330 | myb-like HTH transcriptional regulator family protein;(source:Araport11)                                                                                                                                                                                                                                                                                                                                                                                                             | 36.72   | 139.64  | 0.26 | 1.54E-05 | 1.01E-04 |
| 6253 | 7 | F2-3 vs. S2-3 | 262203_at  | AT2G01060 | Ribosomal protein S7p/S5e family protein;(source:Araport11)                                                                                                                                                                                                                                                                                                                                                                                                                          | 17.95   | 68.89   | 0.26 | 2.89E-05 | 1.58E-04 |
| 6254 | 7 | F2-3 vs. S2-3 | 265238_s_a | AT2G07696 | Encodes a protein with two tandem-arrayed CCCH-type zinc fingers that binds RNA and is involved in RNA turnover. The mRNA is cell-to-cell mobile.                                                                                                                                                                                                                                                                                                                                    | 69.56   | 269.86  | 0.26 | 6.40E-06 | 5.42E-05 |
| 6255 | 7 | F2-3 vs. S2-3 | 266656_at  | AT2G25900 | Leucine-rich repeat protein kinase family protein;(source:Araport11)                                                                                                                                                                                                                                                                                                                                                                                                                 | 186.18  | 714.09  | 0.26 | 4.00E-07 | 8.26E-06 |
| 6256 | 7 | F2-3 vs. S2-3 | 267619_at  | AT2G26730 | hypothetical protein;(source:Araport11)                                                                                                                                                                                                                                                                                                                                                                                                                                              | 12.86   | 48.91   | 0.26 | 6.75E-05 | 2.90E-04 |
| 6257 | 7 | F2-3 vs. S2-3 | 267636_at  | AT2G42110 | proline-rich receptor-like kinase, putative (DUF1421);(source:Araport11)                                                                                                                                                                                                                                                                                                                                                                                                             | 17.43   | 65.9    | 0.26 | 3.48E-04 | 1.00E-03 |
| 6258 | 7 | F2-3 vs. S2-3 | 259175_at  | AT3G01560 |                                                                                                                                                                                                                                                                                                                                                                                                                                                                                      |         |         |      |          |          |
|      |   |               |            |           | SmD1a is one of two Yeast SmD1 orthologs, lower levels than SmD1b. It is localized to the nucleus and may play a minor role in RNA splicing and indirectly facilitating PTGS.                                                                                                                                                                                                                                                                                                        | 37.25   | 143.2   | 0.26 | 4.00E-07 | 8.26E-06 |
| 6259 | 7 | F2-3 vs. S2-3 | 259225_at  | AT3G07590 | 60S ribosomal protein L23A (RPL23aB). Paralog of RPL23aA.                                                                                                                                                                                                                                                                                                                                                                                                                            | 178.02  | 680.48  | 0.26 | 1.22E-05 | 8.58E-05 |
| 6260 | 7 | F2-3 vs. S2-3 | 251783_at  | AT3G55280 | SmD1b is one of two Yeast SmD1 orthologs, the other being SmD1a. SmD1b accumulates to higher levels than SmD1a. It is localized to the nucleolus and nuclear speckles and appears to have a role in RNA splicing and indirectly facilitating PTGS.                                                                                                                                                                                                                                   |         |         |      |          |          |
| 6261 | 7 | F2-3 vs. S2-3 | 255458_at  | AT4G02840 | Encodes a protein containing three copies of the HMG (high mobility group)-box domain. The two Arabidopsis 3xHMG-box proteins are: AT4G11080 (3xHMG-box1) and AT4G23800 (3xHMG-box2).                                                                                                                                                                                                                                                                                                | 20.2    | 79.17   | 0.26 | 3.08E-05 | 1.66E-04 |
| 6262 | 7 | F2-3 vs. S2-3 | 254964_at  | AT4G11080 | Interacts with mitotic and meiotic chromosomes.                                                                                                                                                                                                                                                                                                                                                                                                                                      | 10.54   | 40.15   | 0.26 | 1.75E-04 | 5.95E-04 |
| 6263 | 7 | F2-3 vs. S2-3 | 253684_at  | AT4G29690 | Alkaline-phosphatase-like family protein;(source:Araport11)                                                                                                                                                                                                                                                                                                                                                                                                                          | 23.92   | 91.18   | 0.26 | 7.00E-07 | 1.20E-05 |
| 6264 | 7 | F2-3 vs. S2-3 | 253597_at  | AT4G30690 | SVR9-LIKE1 (SVR9L1)                                                                                                                                                                                                                                                                                                                                                                                                                                                                  | 48.09   | 183.26  | 0.26 | 8.00E-07 | 1.32E-05 |
| 6265 | 7 | F2-3 vs. S2-3 | 250683_x_a | AT5G06640 | Proline-rich extensin-like family protein;(source:Araport11)                                                                                                                                                                                                                                                                                                                                                                                                                         | 17.54   | 66.64   | 0.26 | 1.62E-05 | 1.04E-04 |
| 6266 | 7 | F2-3 vs. S2-3 | 250565_at  | AT5G08000 | Encodes a member of the X8-GPI family of proteins. It localizes to the plasmodesmata and binds callose.                                                                                                                                                                                                                                                                                                                                                                              | 151.24  | 586.64  | 0.26 | 2.00E-07 | 4.97E-06 |
|      |   |               |            |           | encodes a member of glycosyl hydrolase family 36. Expression is induced within 3 hours of dark treatment, in senescing leaves and treatment with exogenous photosynthesis inhibitor. Induction of gene expression was suppressed in excised leaves supplied with sugar. The authors suggest that the gene's expression pattern is responding to the level of sugar in the cell. The mRNA is cell-to-cell mobile.                                                                     |         |         |      |          |          |
| 6267 | 7 | F2-3 vs. S2-3 | 246114_at  | AT5G20250 |                                                                                                                                                                                                                                                                                                                                                                                                                                                                                      | 67.95   | 259.59  | 0.26 | 3.41E-05 | 1.79E-04 |
| 6268 | 7 | F2-3 vs. S2-3 | 249235_at  | AT5G42100 | encodes a plasmodesmal (Pd)-associated membrane protein involved in plasmodesmal callose degradation, i.e. beta-1,3-glucanase (EC 3.2.1.39), and functions in the gating of Pd                                                                                                                                                                                                                                                                                                       | 105.74  | 403.46  | 0.26 | 3.02E-05 | 1.63E-04 |
| 6269 | 7 | F2-3 vs. S2-3 | 248186_at  | AT5G53880 | hypothetical protein;(source:Araport11)                                                                                                                                                                                                                                                                                                                                                                                                                                              | 13.06   | 50.95   | 0.26 | 3.80E-05 | 1.94E-04 |
| 6270 | 7 | F2-3 vs. S2-3 | 247563_at  | AT5G61130 | Encodes a plasmodesmatal localized protein with callose binding activity. The function of PDCB1 is unknown but overexpression leads to the hyperaccumulation of callose.                                                                                                                                                                                                                                                                                                             | 55.14   | 210.64  | 0.26 | 3.98E-05 | 2.01E-04 |
| 6271 | 7 | F2-3 vs. S2-3 | 265085_at  | AT1G03780 | Homolog of vertebrate TPX2. Protein has three domains involved in nuclear targeting, one in nuclear export and two in microtubule binding. Involved in mitotic spindle assembly during late prophase and early prometaphase.                                                                                                                                                                                                                                                         | 17.36   | 69.07   | 0.25 | 1.88E-04 | 6.31E-04 |
|      |   |               |            |           | Encodes a protein disulfide isomerase-like (PDIL) protein, a member of a multigene family within the thioredoxin (TRX) superfamily; isoform contains non-consensus GA donor splice site at intron 9. Transcript levels for this gene are up-regulated in response to three different chemical inducers of ER stress (dithiothreitol, beta-mercaptoethanol, and tunicamycin). Neither AtIRE1-2 nor AtbZIP60 appear to be required for this response. The mRNA is cell-to-cell mobile. | 43.89   | 178.57  | 0.25 | 2.10E-06 | 2.53E-05 |
| 6272 | 7 | F2-3 vs. S2-3 | 262504_at  | AT1G21750 | Ribosomal protein L34e superfamily protein;(source:Araport11)                                                                                                                                                                                                                                                                                                                                                                                                                        | 294.63  | 1160.03 | 0.25 | 8.80E-06 | 6.88E-05 |
| 6273 | 7 | F2-3 vs. S2-3 | 263691_at  | AT1G26880 | Pseudouridine synthase family protein;(source:Araport11)                                                                                                                                                                                                                                                                                                                                                                                                                             | 35.39   | 144.41  | 0.25 | 6.10E-06 | 5.23E-05 |
| 6274 | 7 | F2-3 vs. S2-3 | 255985_at  | AT1G34150 | Ribosomal protein L39 family protein;(source:Araport11)                                                                                                                                                                                                                                                                                                                                                                                                                              | 1050.52 | 4205.35 | 0.25 | 4.50E-06 | 4.27E-05 |
| 6275 | 7 | F2-3 vs. S2-3 | 263585_at  | AT2G25210 |                                                                                                                                                                                                                                                                                                                                                                                                                                                                                      |         |         |      |          |          |

|      |   |               |            |           |                                                                                                                                                                                                                                                                                                                                                                                                                                                                                                                                                                                                                                                                                                                                                                                                                                                                |        |         |      |          |          |
|------|---|---------------|------------|-----------|----------------------------------------------------------------------------------------------------------------------------------------------------------------------------------------------------------------------------------------------------------------------------------------------------------------------------------------------------------------------------------------------------------------------------------------------------------------------------------------------------------------------------------------------------------------------------------------------------------------------------------------------------------------------------------------------------------------------------------------------------------------------------------------------------------------------------------------------------------------|--------|---------|------|----------|----------|
| 6276 | 7 | F2-3 vs. S2-3 | 263785_at  | AT2G46390 | predicted to encode subunit 8 of mitochondrial complex II and to participate in the respiratory chain                                                                                                                                                                                                                                                                                                                                                                                                                                                                                                                                                                                                                                                                                                                                                          | 79.81  | 315.51  | 0.25 | 3.90E-06 | 3.86E-05 |
| 6277 | 7 | F2-3 vs. S2-3 | 258471_at  | AT3G06030 | NPK1-related protein kinase 3                                                                                                                                                                                                                                                                                                                                                                                                                                                                                                                                                                                                                                                                                                                                                                                                                                  | 12.9   | 50.73   | 0.25 | 8.00E-07 | 1.32E-05 |
| 6278 | 7 | F2-3 vs. S2-3 | 251592_at  | AT3G57670 | Encodes a C2H2/C2HC zinc finger transcription factor specifically expressed in the transmitting tract and involved in transmitting tract development and pollen tube growth. Acts redundantly with WIP4 and WIP5 to determine distal cell fate in the root. MP binds to regulatory elements within the NTT locus and likely regulates its expression.                                                                                                                                                                                                                                                                                                                                                                                                                                                                                                          | 13.36  | 53.27   | 0.25 | 3.06E-04 | 9.08E-04 |
| 6279 | 7 | F2-3 vs. S2-3 | 253382_at  | AT4G33040 | Encodes a member of the CC-type glutaredoxin (ROXY) family that has been shown to interact with the transcription factor TGA2.                                                                                                                                                                                                                                                                                                                                                                                                                                                                                                                                                                                                                                                                                                                                 | 159.34 | 625.42  | 0.25 | 2.00E-07 | 4.97E-06 |
| 6280 | 7 | F2-3 vs. S2-3 | 248103_at  | AT5G55160 | Encodes a small ubiquitin-like modifier (SUMO) polypeptide that becomes covalently attached to various intracellular protein targets, much like ubiquitination, leading to post-translational modification of those targets. SUMO2 can form SUMO chains through lysine residue 10 during in vitro assays.                                                                                                                                                                                                                                                                                                                                                                                                                                                                                                                                                      | 364.86 | 1457.71 | 0.25 | 4.00E-07 | 8.26E-06 |
| 6281 | 7 | F2-3 vs. S2-3 | 261259_at  | AT1G26660 | Prefoldin chaperone subunit family protein;(source:Araport11)                                                                                                                                                                                                                                                                                                                                                                                                                                                                                                                                                                                                                                                                                                                                                                                                  | 49.46  | 203.78  | 0.24 | 4.00E-07 | 8.26E-06 |
| 6282 | 7 | F2-3 vs. S2-3 | 259697_at  | AT1G68920 | basic helix-loop-helix (bHLH) DNA-binding superfamily protein;(source:Araport11)                                                                                                                                                                                                                                                                                                                                                                                                                                                                                                                                                                                                                                                                                                                                                                               | 32.32  | 136.41  | 0.24 | 6.20E-05 | 2.75E-04 |
| 6283 | 7 | F2-3 vs. S2-3 | 260180_at  | AT1G70660 | MMZ2/UEV1B encodes a protein that may play a role in DNA damage responses and error-free post-replicative DNA repair by participating in lysine-63-based polyubiquitination reactions. UEV1A can form diubiquitin and triubiquitin chains in combination with UBC13A/UBC35 in vitro. It can also functionally complement an mms2 mutation in budding yeast, both by increasing mms2 mutant viability in the presence of the DNA damaging agent MMS, and by reducing the rate of spontaneous DNA mutation. However, a combination of MMZ2/UEV1B and UBC13A do not do a good job of rescuing an mms2 ubc13 double mutant in yeast. MMZ2/UEV1B transcripts are found in most plant organs, but not in the pollen or in seedlings 6 hours or 2 days post-germination. The transcript levels do not appear to be stress-inducible. The mRNA is cell-to-cell mobile. | 50.51  | 212.57  | 0.24 | 6.89E-05 | 2.95E-04 |
| 6284 | 7 | F2-3 vs. S2-3 | 263631_at  | AT2G04900 | hypothetical protein;(source:Araport11)                                                                                                                                                                                                                                                                                                                                                                                                                                                                                                                                                                                                                                                                                                                                                                                                                        | 44.26  | 182.73  | 0.24 | 3.00E-07 | 6.68E-06 |
| 6285 | 7 | F2-3 vs. S2-3 | 266044_s_a | AT2G07725 | Ribosomal L5P family protein;(source:Araport11)                                                                                                                                                                                                                                                                                                                                                                                                                                                                                                                                                                                                                                                                                                                                                                                                                | 15.94  | 65.68   | 0.24 | 2.00E-07 | 4.97E-06 |
| 6286 | 7 | F2-3 vs. S2-3 | 263420_at  | AT2G17240 | Participates in the late stages of the biogenesis of 50S ribosomal subunits in plastids.                                                                                                                                                                                                                                                                                                                                                                                                                                                                                                                                                                                                                                                                                                                                                                       | 86.75  | 363.8   | 0.24 | 4.00E-07 | 8.26E-06 |
| 6287 | 7 | F2-3 vs. S2-3 | 263371_at  | AT2G20490 | nucleolar RNA-binding Nop10p family protein;(source:Araport11)                                                                                                                                                                                                                                                                                                                                                                                                                                                                                                                                                                                                                                                                                                                                                                                                 | 202.58 | 852.71  | 0.24 | 9.14E-05 | 3.66E-04 |
| 6288 | 7 | F2-3 vs. S2-3 | 266981_at  | AT2G39460 | Encodes a 60S ribosomal protein L23aA (AtrpL23aA). Paralog of RLPL23aB.                                                                                                                                                                                                                                                                                                                                                                                                                                                                                                                                                                                                                                                                                                                                                                                        | 151.07 | 623.55  | 0.24 | 2.90E-06 | 3.14E-05 |
| 6289 | 7 | F2-3 vs. S2-3 | 251555_at  | AT3G58780 | One of two genes (SHP1 and SHP2) that are required for fruit dehiscence. The two genes control dehiscence zone differentiation and promote the lignification of adjacent cells.                                                                                                                                                                                                                                                                                                                                                                                                                                                                                                                                                                                                                                                                                | 99.84  | 416.46  | 0.24 | 3.70E-06 | 3.73E-05 |
| 6290 | 7 | F2-3 vs. S2-3 | 251365_at  | AT3G61310 | AT hook motif DNA-binding family protein;(source:Araport11)                                                                                                                                                                                                                                                                                                                                                                                                                                                                                                                                                                                                                                                                                                                                                                                                    | 84.17  | 352.15  | 0.24 | 7.00E-07 | 1.20E-05 |
| 6291 | 7 | F2-3 vs. S2-3 | 254694_at  | AT4G17900 | PLATZ transcription factor family protein;(source:Araport11)                                                                                                                                                                                                                                                                                                                                                                                                                                                                                                                                                                                                                                                                                                                                                                                                   | 60.52  | 252.31  | 0.24 | 1.30E-06 | 1.81E-05 |
| 6292 | 7 | F2-3 vs. S2-3 | 254262_at  | AT4G23470 | PLAC8 family protein;(source:Araport11)                                                                                                                                                                                                                                                                                                                                                                                                                                                                                                                                                                                                                                                                                                                                                                                                                        | 17.71  | 73.57   | 0.24 | 1.00E-07 | 2.96E-06 |
| 6293 | 7 | F2-3 vs. S2-3 | 252957_at  | AT4G38680 | Encodes a glycine-rich protein that binds nucleic acids and promotes DNA melting. Its transcript and protein levels are up-regulated in response to cold treatment with protein levels peaking earlier in shoots (~10-14 days) than in roots (~21 days). It is normally expressed in meristematic regions and developing tissues where cell division occurs. RNAi and antisense lines with lower levels of CSP2/GRP2 transcripts flower earlier than wild type plants and have some defects in anther and seed development.                                                                                                                                                                                                                                                                                                                                    | 87.79  | 362.07  | 0.24 | 1.16E-05 | 8.35E-05 |
| 6294 | 7 | F2-3 vs. S2-3 | 248658_at  | AT5G48600 | member of SMC subfamily                                                                                                                                                                                                                                                                                                                                                                                                                                                                                                                                                                                                                                                                                                                                                                                                                                        | 64.81  | 273.19  | 0.24 | 1.00E-07 | 2.96E-06 |
| 6295 | 7 | F2-3 vs. S2-3 | 259538_at  | AT1G12310 | Calcium-binding EF-hand family protein;(source:Araport11)                                                                                                                                                                                                                                                                                                                                                                                                                                                                                                                                                                                                                                                                                                                                                                                                      | 40.38  | 174.78  | 0.23 | 4.00E-07 | 8.26E-06 |
| 6296 | 7 | F2-3 vs. S2-3 | 266074_at  | AT2G18740 | Putative temperature-specific splice regulator of development. Only the first splice form (PCP-alpha) has this function as result of C-terminal addition.                                                                                                                                                                                                                                                                                                                                                                                                                                                                                                                                                                                                                                                                                                      | 51.14  | 219.48  | 0.23 | 6.00E-07 | 1.10E-05 |
| 6297 | 7 | F2-3 vs. S2-3 | 259331_at  | AT3G03840 | SAUR-like auxin-responsive protein family;(source:Araport11)                                                                                                                                                                                                                                                                                                                                                                                                                                                                                                                                                                                                                                                                                                                                                                                                   | 10.11  | 44.62   | 0.23 | 2.90E-06 | 3.14E-05 |
| 6298 | 7 | F2-3 vs. S2-3 | 258090_at  | AT3G14600 | Ribosomal protein L18ae/LX family protein;(source:Araport11)                                                                                                                                                                                                                                                                                                                                                                                                                                                                                                                                                                                                                                                                                                                                                                                                   | 105.39 | 458.32  | 0.23 | 3.00E-07 | 6.68E-06 |
| 6299 | 7 | F2-3 vs. S2-3 | 256794_at  | AT3G22230 | Ribosomal L27e protein family;(source:Araport11)                                                                                                                                                                                                                                                                                                                                                                                                                                                                                                                                                                                                                                                                                                                                                                                                               | 20.94  | 90.53   | 0.23 | 1.70E-05 | 1.08E-04 |
| 6300 | 7 | F2-3 vs. S2-3 | 251926_at  | AT3G53740 | Ribosomal protein L36e family protein;(source:Araport11)                                                                                                                                                                                                                                                                                                                                                                                                                                                                                                                                                                                                                                                                                                                                                                                                       | 281.96 | 1243.06 | 0.23 | 4.40E-06 | 4.21E-05 |
| 6301 | 7 | F2-3 vs. S2-3 | 255035_at  | AT4G09550 | Encodes a gamma-tubulin complex protein that plays a role in gamma-tubulin complex localization, spindle stability and chromosomal segregation.                                                                                                                                                                                                                                                                                                                                                                                                                                                                                                                                                                                                                                                                                                                | 43.46  | 186.96  | 0.23 | 2.00E-07 | 4.97E-06 |
| 6302 | 7 | F2-3 vs. S2-3 | 250007_at  | AT5G18670 | putative beta-amylase BMY3 (BMY3)                                                                                                                                                                                                                                                                                                                                                                                                                                                                                                                                                                                                                                                                                                                                                                                                                              | 805.84 | 3474.2  | 0.23 | 1.01E-05 | 7.57E-05 |

|      |   |               |            |           |                                                                                                                                                                                                                                                                                                                                                                                                                                                                                                                                                                                        |        |         |      |          |          |
|------|---|---------------|------------|-----------|----------------------------------------------------------------------------------------------------------------------------------------------------------------------------------------------------------------------------------------------------------------------------------------------------------------------------------------------------------------------------------------------------------------------------------------------------------------------------------------------------------------------------------------------------------------------------------------|--------|---------|------|----------|----------|
| 6303 | 7 | F2-3 vs. S2-3 | 246028_at  | AT5G21170 | Encodes AKINbeta1, a subunit of the SnRK1 kinase (Sucrose non-fermenting-1-related protein kinase). Involved in regulation of nitrogen and sugar metabolism. As part of the regulatory subunit, it binds maltose which promotes kinase activity. Acts as a global regulator of genes involved in carbon, lipid and nitrogen metabolism.                                                                                                                                                                                                                                                | 43.13  | 189.08  | 0.23 | 2.80E-06 | 3.09E-05 |
| 6304 | 7 | F2-3 vs. S2-3 | 265117_at  | AT1G62500 | Bifunctional inhibitor/lipid-transfer protein/seed storage 2S albumin superfamily protein;(source:Araport11)                                                                                                                                                                                                                                                                                                                                                                                                                                                                           | 112.89 | 502.23  | 0.22 | 1.53E-05 | 1.00E-04 |
| 6305 | 7 | F2-3 vs. S2-3 | 257474_at  | AT1G80850 | DNA glycosylase superfamily protein;(source:Araport11)                                                                                                                                                                                                                                                                                                                                                                                                                                                                                                                                 | 42.14  | 191.72  | 0.22 | 2.24E-04 | 7.16E-04 |
| 6306 | 7 | F2-3 vs. S2-3 | 266579_at  | AT2G23930 | Putative small nuclear ribonucleoprotein G;(source:Araport11)                                                                                                                                                                                                                                                                                                                                                                                                                                                                                                                          | 179.82 | 813.38  | 0.22 | 1.20E-06 | 1.75E-05 |
| 6307 | 7 | F2-3 vs. S2-3 | 263286_at  | AT2G36160 | Ribosomal protein S11 family protein;(source:Araport11)                                                                                                                                                                                                                                                                                                                                                                                                                                                                                                                                | 39.83  | 184.86  | 0.22 | 4.00E-07 | 8.26E-06 |
| 6308 | 7 | F2-3 vs. S2-3 | 263914_at  | AT2G36400 | Growth regulating factor encoding transcription activator. One of the nine members of a GRF gene family, containing nuclear targeting domain. Mutants result in smaller leaves indicating the role of the gene in leaf development. Expressed in root, shoot and flower. AGAMOUS [AG]-like MADS box protein (AGL5) involved in fruit development (valve margin and dehiscence zone differentiation). A putative direct target of AG. SHP2 has been shown to be a downstream gene of the complex formed by AG and SEP proteins (SEP4 alone does not form a functional complex with AG). | 19.39  | 87.43   | 0.22 | 9.00E-07 | 1.44E-05 |
| 6309 | 7 | F2-3 vs. S2-3 | 263988_at  | AT2G42830 | SWIB/MDM2 domain superfamily protein;(source:Araport11)                                                                                                                                                                                                                                                                                                                                                                                                                                                                                                                                | 119.47 | 549.38  | 0.22 | 2.00E-07 | 4.97E-06 |
| 6310 | 7 | F2-3 vs. S2-3 | 259171_at  | AT3G03590 | alpha/beta-Hydrolases superfamily protein;(source:Araport11)                                                                                                                                                                                                                                                                                                                                                                                                                                                                                                                           | 69.67  | 318.82  | 0.22 | 2.10E-06 | 2.53E-05 |
| 6311 | 7 | F2-3 vs. S2-3 | 252357_at  | AT3G48410 | allyl alcohol dehydrogenase-like protein;(source:Araport11)                                                                                                                                                                                                                                                                                                                                                                                                                                                                                                                            | 24.99  | 113.97  | 0.22 | 2.00E-07 | 4.97E-06 |
| 6312 | 7 | F2-3 vs. S2-3 | 251446_at  | AT3G59840 | Member of the minichromosome maintenance complex, involved in DNA replication initiation. Abundant in proliferating and endocycling tissues. Localized in the nucleus during G1, S and G2 phases of the cell cycle, and are released into the cytoplasmic compartment during mitosis. Binds chromatin.                                                                                                                                                                                                                                                                                 | 32.14  | 143.9   | 0.22 | 8.00E-07 | 1.32E-05 |
| 6313 | 7 | F2-3 vs. S2-3 | 255513_at  | AT4G02060 | encodes a member of xyloglucan endotransglucosylase/hydrolases (XTHs) that catalyze the cleavage and molecular grafting of xyloglucan chains function in loosening and rearrangement of the cell wall. Gene is expressed in shoot apex region, flower buds, flower stalks and internodes bearing flowers.                                                                                                                                                                                                                                                                              | 11.2   | 50.69   | 0.22 | 1.62E-04 | 5.63E-04 |
| 6314 | 7 | F2-3 vs. S2-3 | 255433_at  | AT4G03210 | Ribosomal protein L31e family protein;(source:Araport11)                                                                                                                                                                                                                                                                                                                                                                                                                                                                                                                               | 48.47  | 216.44  | 0.22 | 2.30E-06 | 2.69E-05 |
| 6315 | 7 | F2-3 vs. S2-3 | 254012_at  | AT4G26230 | proline-rich extensin-like family protein;(source:Araport11)                                                                                                                                                                                                                                                                                                                                                                                                                                                                                                                           | 346.66 | 1598.95 | 0.22 | 1.00E-07 | 2.96E-06 |
| 6316 | 7 | F2-3 vs. S2-3 | 250682_x_a | AT5G06630 | cytochrome c biogenesis orf382                                                                                                                                                                                                                                                                                                                                                                                                                                                                                                                                                         | 13.95  | 64.2    | 0.22 | 1.90E-06 | 2.37E-05 |
| 6317 | 7 | F2-3 vs. S2-3 | 244912_at  | ATMG00830 | stress response NST1-like protein;(source:Araport11)                                                                                                                                                                                                                                                                                                                                                                                                                                                                                                                                   | 350.13 | 1573.85 | 0.22 | 2.40E-06 | 2.77E-05 |
| 6318 | 7 | F2-3 vs. S2-3 | 261886_s_a | AT1G80700 | Encodes a member of the GATA factor family of zinc finger transcription factors.                                                                                                                                                                                                                                                                                                                                                                                                                                                                                                       | 54.25  | 256.65  | 0.21 | 6.00E-07 | 1.10E-05 |
| 6319 | 7 | F2-3 vs. S2-3 | 256916_at  | AT3G24050 | Translation protein SH3-like family protein;(source:Araport11)                                                                                                                                                                                                                                                                                                                                                                                                                                                                                                                         | 13.24  | 62.94   | 0.21 | 9.20E-06 | 7.13E-05 |
| 6320 | 7 | F2-3 vs. S2-3 | 252235_at  | AT3G49910 | Encodes a member of KPP-like gene family, homolog of KPP (kinase partner protein) gene in tomato. Also a member of the RopGEF (guanine nucleotide exchange factor) family, containing the novel PRONE domain (plant-specific Rop nucleotide exchanger), which is exclusively active towards members of the Rop subfamily.                                                                                                                                                                                                                                                              | 830.52 | 4021.99 | 0.21 | 9.00E-07 | 1.44E-05 |
| 6321 | 7 | F2-3 vs. S2-3 | 251778_at  | AT3G55660 | Proline-rich extensin-like family protein;(source:Araport11)                                                                                                                                                                                                                                                                                                                                                                                                                                                                                                                           | 54.31  | 253.31  | 0.21 | < 1e-07  | 2.96E-06 |
| 6322 | 7 | F2-3 vs. S2-3 | 255140_x_a | AT4G08410 | Encodes a transcription factor of the bHLH protein family. Mutants have abnormal, unfused carpels and reduced seed dormancy.                                                                                                                                                                                                                                                                                                                                                                                                                                                           | 19.14  | 89.21   | 0.21 | 4.00E-07 | 8.26E-06 |
| 6323 | 7 | F2-3 vs. S2-3 | 246212_at  | AT4G36930 | Leucine-rich repeat protein kinase family protein;(source:Araport11)                                                                                                                                                                                                                                                                                                                                                                                                                                                                                                                   | 20.54  | 97.44   | 0.21 | 4.00E-07 | 8.26E-06 |
| 6324 | 7 | F2-3 vs. S2-3 | 250102_at  | AT5G16590 | A member of ARF GTPase family. A thaliana has 21 members of this family, known to be essential for vesicle coating and uncoating and functions in GTP-binding. Gene encoding ADP-ribosylation factor and similar to ADP-ribosylation factor 1; ARF 1 (GP:385340) (Drosophila melanogaster), other ARFs and ARF-like proteins.                                                                                                                                                                                                                                                          | 31.56  | 147.2   | 0.21 | 1.80E-06 | 2.29E-05 |
| 6325 | 7 | F2-3 vs. S2-3 | 246422_at  | AT5G17060 | Encodes an AP2/ERF-type transcription factor that is preferentially expressed in the epidermis and induced by darkness and negatively regulates cuticular wax biosynthesis.                                                                                                                                                                                                                                                                                                                                                                                                            | 79.4   | 372.73  | 0.21 | 2.30E-06 | 2.69E-05 |
| 6326 | 7 | F2-3 vs. S2-3 | 247540_at  | AT5G61590 | SPT4 homolog 2;(source:Araport11)                                                                                                                                                                                                                                                                                                                                                                                                                                                                                                                                                      | 20.54  | 99.63   | 0.21 | < 1e-07  | 2.96E-06 |
| 6327 | 7 | F2-3 vs. S2-3 | 247355_at  | AT5G63670 | Zinc-binding ribosomal protein family protein;(source:Araport11)                                                                                                                                                                                                                                                                                                                                                                                                                                                                                                                       | 66.26  | 316.57  | 0.21 | 3.10E-06 | 3.28E-05 |
| 6328 | 7 | F2-3 vs. S2-3 | 262594_at  | AT1G15250 | Encodes a gene induced by low temperature and dehydration. Inhibits e.coli growth while overexpressed. Belongs to the dehydrin protein family, which contains highly conserved stretches of 7-17 residues that are repetitively scattered in their sequences, the K-, S-, Y- and lysine rich segments. LTI29 and LTI30 double overexpressors confer cold tolerance. Localized to membranes and cytoplasm.                                                                                                                                                                              | 39.07  | 198.11  | 0.2  | 2.60E-06 | 2.94E-05 |
| 6329 | 7 | F2-3 vs. S2-3 | 259516_at  | AT1G20450 |                                                                                                                                                                                                                                                                                                                                                                                                                                                                                                                                                                                        | 122.15 | 598.26  | 0.2  | 7.35E-04 | 1.78E-03 |



|      |   |               |            |           |                                                                                                                                                                                                                                                                                                                                                                                                                                                    |        |         |      |          |          |
|------|---|---------------|------------|-----------|----------------------------------------------------------------------------------------------------------------------------------------------------------------------------------------------------------------------------------------------------------------------------------------------------------------------------------------------------------------------------------------------------------------------------------------------------|--------|---------|------|----------|----------|
|      |   |               |            |           | Member of the MADs box transcription factor family. SEP3 is redundant with SEP1 and 2. Flowers of SEP1/2/3 triple mutants show a conversion of petals and stamens to sepals.SEP3 forms heterotetrameric complexes with other MADS box family members and binds to the CarG box motif.                                                                                                                                                              | 128.49 | 656.26  | 0.2  | 2.00E-07 | 4.97E-06 |
| 6330 | 7 | F2-3 vs. S2-3 | 264872_at  | AT1G24260 |                                                                                                                                                                                                                                                                                                                                                                                                                                                    |        |         |      |          |          |
| 6331 | 7 | F2-3 vs. S2-3 | 245311_at  | AT4G14320 | Zinc-binding ribosomal protein family protein;(source:Araport11)                                                                                                                                                                                                                                                                                                                                                                                   | 55.02  | 271.42  | 0.2  | 7.50E-06 | 6.08E-05 |
| 6332 | 7 | F2-3 vs. S2-3 | 253482_at  | AT4G31985 | Expressed protein<br>Glycerophosphoryl diester phosphodiesterase-like protein involved in cell wall cellulose accumulation and pectin linking. Impacts root hair, trichome and epidermal cell development. The mRNA is cell-to-cell mobile.                                                                                                                                                                                                        | 509.54 | 2564.96 | 0.2  | 1.21E-05 | 8.58E-05 |
| 6333 | 7 | F2-3 vs. S2-3 | 248085_at  | AT5G55480 |                                                                                                                                                                                                                                                                                                                                                                                                                                                    | 29.72  | 150.08  | 0.2  | 4.50E-05 | 2.19E-04 |
| 6334 | 7 | F2-3 vs. S2-3 | 261019_at  | AT1G26470 | chromatin modification-like protein;(source:Araport11)                                                                                                                                                                                                                                                                                                                                                                                             | 25.15  | 130.87  | 0.19 | 2.00E-07 | 4.97E-06 |
|      |   |               |            |           | Encodes a plasma membrane localized leucine-rich repeat receptor kinase that is involved in cell wall elongation. Loss of function mutations of FEI1 and FEI2 exhibit defects in root and hypocotyl cell elongation. Double mutants are defective in cell wall biosynthesis and have thick hypocotyls, and short, thick roots.Mucilage is easily detached from fei2 mutants seeds, and forms a capsule that is >50% smaller relative to wild-type. |        |         |      |          |          |
| 6335 | 7 | F2-3 vs. S2-3 | 265844_at  | AT2G35620 |                                                                                                                                                                                                                                                                                                                                                                                                                                                    | 12.13  | 62.6    | 0.19 | 7.00E-07 | 1.20E-05 |
|      |   |               |            |           | Encodes a putative extracellular proline-rich protein is exclusively expressed in the L1 layer of vegetative, inflorescence and floral meristems and the protoderm of organ primordia.                                                                                                                                                                                                                                                             | 334.26 | 1752.42 | 0.19 | 2.06E-05 | 1.24E-04 |
| 6336 | 7 | F2-3 vs. S2-3 | 263979_at  | AT2G42840 |                                                                                                                                                                                                                                                                                                                                                                                                                                                    |        |         |      |          |          |
| 6337 | 7 | F2-3 vs. S2-3 | 258552_at  | AT3G07010 | Pectin lyase-like superfamily protein;(source:Araport11)                                                                                                                                                                                                                                                                                                                                                                                           | 73.14  | 389.83  | 0.19 | 1.90E-06 | 2.37E-05 |
| 6338 | 7 | F2-3 vs. S2-3 | 258296_at  | AT3G23390 | Zinc-binding ribosomal protein family protein;(source:Araport11)                                                                                                                                                                                                                                                                                                                                                                                   | 38.9   | 209.77  | 0.19 | 2.80E-06 | 3.09E-05 |
|      |   |               |            |           | Encodes a cullin that is a component of SCF ubiquitin ligase complexes involved in mediating responses to auxin and jasmonic acid. Homozygous auxin-resistant mutants arrest growth soon after germination, lacking a root and hypocotyl. Heterozygotes display a variety of phenotypes consistent with impaired auxin response.                                                                                                                   |        |         |      |          |          |
| 6339 | 7 | F2-3 vs. S2-3 | 255441_at  | AT4G02570 |                                                                                                                                                                                                                                                                                                                                                                                                                                                    | 88.28  | 469.99  | 0.19 | 7.00E-07 | 1.20E-05 |
| 6340 | 7 | F2-3 vs. S2-3 | 255298_at  | AT4G04840 | methionine sulfoxide reductase B6;(source:Araport11)                                                                                                                                                                                                                                                                                                                                                                                               | 24.16  | 124.41  | 0.19 | 7.00E-07 | 1.20E-05 |
| 6341 | 7 | F2-3 vs. S2-3 | 253989_at  | AT4G26130 | cotton fiber protein;(source:Araport11)                                                                                                                                                                                                                                                                                                                                                                                                            | 22.3   | 116.33  | 0.19 | 1.10E-06 | 1.64E-05 |
| 6342 | 7 | F2-3 vs. S2-3 | 253728_at  | AT4G29410 | Ribosomal L28e protein family;(source:Araport11)                                                                                                                                                                                                                                                                                                                                                                                                   | 42.55  | 222.84  | 0.19 | 5.00E-06 | 4.58E-05 |
| 6343 | 7 | F2-3 vs. S2-3 | 253404_at  | AT4G32840 | phosphofructokinase 6;(source:Araport11)                                                                                                                                                                                                                                                                                                                                                                                                           | 63.35  | 339.45  | 0.19 | 8.60E-06 | 6.77E-05 |
| 6344 | 7 | F2-3 vs. S2-3 | 250199_at  | AT5G14180 | Myzus persicae-induced lipase 1;(source:Araport11)                                                                                                                                                                                                                                                                                                                                                                                                 | 18.4   | 95.8    | 0.19 | 3.13E-05 | 1.67E-04 |
| 6345 | 7 | F2-3 vs. S2-3 | 246923_at  | AT5G25100 | Endomembrane protein 70 protein family;(source:Araport11)<br>encodes a chloroplast ribosomal protein S3, a constituent of the small subunit of the ribosomal complex                                                                                                                                                                                                                                                                               | 21.88  | 112.73  | 0.19 | 5.80E-06 | 5.07E-05 |
| 6346 | 7 | F2-3 vs. S2-3 | 244985_at  | ATCG00800 |                                                                                                                                                                                                                                                                                                                                                                                                                                                    | 41.37  | 221.59  | 0.19 | 1.42E-05 | 9.57E-05 |
| 6347 | 7 | F2-3 vs. S2-3 | 259541_at  | AT1G20650 | Protein kinase superfamily protein;(source:Araport11)                                                                                                                                                                                                                                                                                                                                                                                              | 24.64  | 138.98  | 0.18 | 6.14E-05 | 2.73E-04 |
| 6348 | 7 | F2-3 vs. S2-3 | 259553_x_a | AT1G21310 | Encodes extensin 3.                                                                                                                                                                                                                                                                                                                                                                                                                                | 14.72  | 81.34   | 0.18 | 5.03E-05 | 2.38E-04 |
| 6349 | 7 | F2-3 vs. S2-3 | 260181_at  | AT1G70710 | endo-1,4-beta-glucanase. Involved in cell elongation.                                                                                                                                                                                                                                                                                                                                                                                              | 145.64 | 797.75  | 0.18 | 1.30E-06 | 1.81E-05 |
| 6350 | 7 | F2-3 vs. S2-3 | 260077_at  | AT1G73620 | Pathogenesis-related thaumatin superfamily protein;(source:Araport11)                                                                                                                                                                                                                                                                                                                                                                              | 81.84  | 458.99  | 0.18 | 2.40E-06 | 2.77E-05 |
| 6351 | 7 | F2-3 vs. S2-3 | 266366_at  | AT2G41420 | proline-rich family protein;(source:Araport11)<br>Encodes an actin-related protein required for normal embryogenesis, plant architecture and floral organ abscission.                                                                                                                                                                                                                                                                              | 186.59 | 1057.85 | 0.18 | 4.90E-06 | 4.55E-05 |
| 6352 | 7 | F2-3 vs. S2-3 | 251340_at  | AT3G60830 |                                                                                                                                                                                                                                                                                                                                                                                                                                                    | 64.23  | 350.04  | 0.18 | 8.00E-07 | 1.32E-05 |
| 6353 | 7 | F2-3 vs. S2-3 | 254915_s_a | AT4G11310 | cysteine proteinase precursor-like protein                                                                                                                                                                                                                                                                                                                                                                                                         | 15.82  | 88.99   | 0.18 | < 1e-07  | < 1e-07  |
| 6354 | 7 | F2-3 vs. S2-3 | 253202_at  | AT4G34555 | Ribosomal protein S25 family protein;(source:Araport11)                                                                                                                                                                                                                                                                                                                                                                                            | 193.25 | 1103.02 | 0.18 | 6.10E-06 | 5.23E-05 |
| 6355 | 7 | F2-3 vs. S2-3 | 251007_at  | AT5G02610 | Ribosomal L29 family protein;(source:Araport11)                                                                                                                                                                                                                                                                                                                                                                                                    | 81.43  | 462.04  | 0.18 | < 1e-07  | < 1e-07  |
|      |   |               |            |           | Encodes a member of the R2R3-MYB transcription factor gene family. Induced by jasmonate. Involved in jasmonate response during stamen development. MYB21 interacts with JAZ proteins, and functions redundantly with MYB24 and MYB57 to regulate stamen development.                                                                                                                                                                               |        |         |      |          |          |
| 6356 | 7 | F2-3 vs. S2-3 | 257220_at  | AT3G27810 |                                                                                                                                                                                                                                                                                                                                                                                                                                                    | 36.66  | 212.6   | 0.17 | 1.19E-05 | 8.49E-05 |
| 6357 | 7 | F2-3 vs. S2-3 | 262558_at  | AT1G31335 | transmembrane protein;(source:Araport11)                                                                                                                                                                                                                                                                                                                                                                                                           | 48.11  | 277.11  | 0.17 | 2.00E-06 | 2.46E-05 |
| 6358 | 7 | F2-3 vs. S2-3 | 264061_at  | AT2G27970 | CDK-subunit 2;(source:Araport11)<br>Encodes a putative transcriptional regulator that is involved in the vegetative to reproductive phase transition. Expression is regulated by MIR156b. SPL activity nonautonomously inhibits initiation of new leaves at the shoot apical meristem.                                                                                                                                                             | 88.67  | 534.84  | 0.17 | < 1e-07  | < 1e-07  |
| 6359 | 7 | F2-3 vs. S2-3 | 267639_at  | AT2G42200 |                                                                                                                                                                                                                                                                                                                                                                                                                                                    | 100.14 | 575.57  | 0.17 | 1.00E-07 | 2.96E-06 |
| 6360 | 7 | F2-3 vs. S2-3 | 259090_at  | AT3G04920 | Ribosomal protein S24e family protein;(source:Araport11)                                                                                                                                                                                                                                                                                                                                                                                           | 67.39  | 396.14  | 0.17 | 3.00E-07 | 6.68E-06 |
| 6361 | 7 | F2-3 vs. S2-3 | 259156_at  | AT3G10380 | Subunit of the Putative Arabidopsis Exocyst Complex<br>WDL5 is an target of EIN3 that co-localizes with cortical microtubules. It its thought to function to stabilize microtubules during ethylene induced hypocotyl elongation.                                                                                                                                                                                                                  | 40.23  | 243.56  | 0.17 | 7.00E-07 | 1.20E-05 |
| 6362 | 7 | F2-3 vs. S2-3 | 253424_at  | AT4G32330 |                                                                                                                                                                                                                                                                                                                                                                                                                                                    | 29.46  | 168.6   | 0.17 | 5.00E-07 | 9.67E-06 |

|      |   |               |            |           |                                                                                                                                                                                                                                                                                                                                                                                             |        |         |      |          |          |
|------|---|---------------|------------|-----------|---------------------------------------------------------------------------------------------------------------------------------------------------------------------------------------------------------------------------------------------------------------------------------------------------------------------------------------------------------------------------------------------|--------|---------|------|----------|----------|
| 6363 | 7 | F2-3 vs. S2-3 | 247962_at  | AT5G56580 | Encodes a member of the MAP Kinase Kinase family of proteins. It can phosphorylate MPK12 in vitro and it can be dephosphorylated by MKP2 in vitro.                                                                                                                                                                                                                                          | 56.49  | 328.77  | 0.17 | 2.00E-07 | 4.97E-06 |
| 6364 | 7 | F2-3 vs. S2-3 | 245640_at  | AT1G25330 | Encodes CESTA, a positive regulator of brassinosteroid biosynthesis.                                                                                                                                                                                                                                                                                                                        | 22.84  | 144.65  | 0.16 | < 1e-07  | < 1e-07  |
| 6365 | 7 | F2-3 vs. S2-3 | 260538_at  | AT2G43460 | Ribosomal L38e protein family;(source:Araport11)                                                                                                                                                                                                                                                                                                                                            | 548.31 | 3393.19 | 0.16 | 1.90E-06 | 2.37E-05 |
| 6366 | 7 | F2-3 vs. S2-3 | 255014_at  | AT4G09960 | Encodes a MADS box transcription factor expressed in the carpel and ovules. Plays a maternal role in fertilization and seed development. Controls the structure and mechanical properties of the seed coat. Controls fruit size by regulating cytokinin levels and FRUITFULL.                                                                                                               | 32     | 206.38  | 0.16 | 1.00E-07 | 2.96E-06 |
| 6367 | 7 | F2-3 vs. S2-3 | 248106_at  | AT5G55100 | SWAP (Suppressor-of-White-APricot)/surp domain-containing protein;(source:Araport11)<br>Encodes an auxin response factor. Mutants have many defects including enlarged rosette leaves, reduced fertility, later senescence, hypocotyl elongation defects, enlarged seeds and enlarged cotyledons. May not mediate auxin effects. Increase in seed size due to increased cell proliferation. | 14.38  | 88.17   | 0.16 | 1.47E-04 | 5.21E-04 |
| 6368 | 7 | F2-3 vs. S2-3 | 247468_at  | AT5G62000 | The mRNA is cell-to-cell mobile.                                                                                                                                                                                                                                                                                                                                                            | 193.98 | 1235.81 | 0.16 | 9.00E-07 | 1.44E-05 |
| 6369 | 7 | F2-3 vs. S2-3 | 247192_at  | AT5G65360 | Histone superfamily protein;(source:Araport11)                                                                                                                                                                                                                                                                                                                                              | 13.66  | 84.99   | 0.16 | < 1e-07  | 2.96E-06 |
| 6370 | 7 | F2-3 vs. S2-3 | 262602_at  | AT1G15270 | Translation machinery associated TMA7;(source:Araport11)                                                                                                                                                                                                                                                                                                                                    | 61.45  | 406.35  | 0.15 | 6.00E-07 | 1.10E-05 |
| 6371 | 7 | F2-3 vs. S2-3 | 256125_at  | AT1G18250 | encodes a thaumatin-like protein                                                                                                                                                                                                                                                                                                                                                            | 46.85  | 318.47  | 0.15 | 2.00E-07 | 4.97E-06 |
| 6372 | 7 | F2-3 vs. S2-3 | 252789_s_a | AT1G21930 | transmembrane protein;(source:Araport11)                                                                                                                                                                                                                                                                                                                                                    | 145.79 | 968.98  | 0.15 | 2.00E-07 | 4.97E-06 |
| 6373 | 7 | F2-3 vs. S2-3 | 266229_at  | AT2G28840 | hypothetical protein;(source:Araport11)                                                                                                                                                                                                                                                                                                                                                     | 30.27  | 205.02  | 0.15 | 1.30E-06 | 1.81E-05 |
| 6374 | 7 | F2-3 vs. S2-3 | 266882_at  | AT2G44670 | senescence-associated family protein (DUF581);(source:Araport11)                                                                                                                                                                                                                                                                                                                            | 52.84  | 355.08  | 0.15 | 3.30E-06 | 3.44E-05 |
| 6375 | 7 | F2-3 vs. S2-3 | 250377_at  | AT5G11560 | catalytics;(source:Araport11)                                                                                                                                                                                                                                                                                                                                                               | 103.79 | 705.25  | 0.15 | 1.10E-06 | 1.64E-05 |
| 6376 | 7 | F2-3 vs. S2-3 | 248747_at  | AT5G47930 | Zinc-binding ribosomal protein family protein;(source:Araport11)                                                                                                                                                                                                                                                                                                                            | 145.46 | 976.3   | 0.15 | 3.00E-07 | 6.68E-06 |
| 6377 | 7 | F2-3 vs. S2-3 | 247478_at  | AT5G62360 | Pectin methylesterase inhibitor expressed throughout the plant.                                                                                                                                                                                                                                                                                                                             | 28.45  | 186.62  | 0.15 | 7.00E-07 | 1.20E-05 |
| 6378 | 7 | F2-3 vs. S2-3 | 262121_at  | AT1G02800 | Encodes a protein with similarity to endo-1,4-b-glucanases and is a member of Glycoside Hydrolase Family 9. CEL2 is induced by nematodes and is expressed in syncytia induced by <i>Heterodera schachtii</i> . May be involved in the development and function of syncytia.                                                                                                                 | 61.32  | 435.61  | 0.14 | < 1e-07  | < 1e-07  |
| 6379 | 7 | F2-3 vs. S2-3 | 261489_at  | AT1G14450 | NADH dehydrogenase (ubiquinone)s;(source:Araport11)<br>Encodes a member of the X8-GPI family of proteins. It localizes to the plasmodesmata and is predicted to bind callose.                                                                                                                                                                                                               | 43.88  | 315.96  | 0.14 | 1.00E-07 | 2.96E-06 |
| 6380 | 7 | F2-3 vs. S2-3 | 255779_at  | AT1G18650 | putative 60S ribosomal protein L34 The mRNA is cell-to-cell mobile.                                                                                                                                                                                                                                                                                                                         | 65.49  | 458.54  | 0.14 | < 1e-07  | < 1e-07  |
| 6381 | 7 | F2-3 vs. S2-3 | 260369_at  | AT1G69620 | TPX2 (targeting protein for Xklp2) protein family;(source:Araport11)                                                                                                                                                                                                                                                                                                                        | 383.49 | 2661.47 | 0.14 | < 1e-07  | 2.96E-06 |
| 6382 | 7 | F2-3 vs. S2-3 | 246557_at  | AT5G15510 |                                                                                                                                                                                                                                                                                                                                                                                             | 27.98  | 199.17  | 0.14 | 9.00E-07 | 1.44E-05 |
| 6383 | 7 | F2-3 vs. S2-3 | 244971_at  | ATCG00670 | Encodes the only ClpP (caseinolytic protease) encoded within the plastid genome. Contains a highly conserved catalytic triad of Ser-type proteases (Ser-His-Asp). Part of the 350 kDa chloroplast Clp complex. The name reflects nomenclature described in Adam et. al (2001).                                                                                                              | 487.62 | 3420.12 | 0.14 | 3.00E-07 | 6.68E-06 |
| 6384 | 7 | F2-3 vs. S2-3 | 244933_at  | ATCG01070 | NADH dehydrogenase ND4L<br>chloroplast gene encoding a ribosomal protein L16, which is a constituent of 50S large ribosomal subunit                                                                                                                                                                                                                                                         | 138.7  | 1004.57 | 0.14 | 2.00E-07 | 4.97E-06 |
| 6385 | 7 | F2-3 vs. S2-3 | 244982_at  | ATCG00790 | polyubiquitin gene The mRNA is cell-to-cell mobile.                                                                                                                                                                                                                                                                                                                                         | 434.59 | 3301.03 | 0.13 | < 1e-07  | 2.96E-06 |
| 6386 | 7 | F2-3 vs. S2-3 | 266768_s_a | AT2G47110 | 60S acidic ribosomal protein family;(source:Araport11)                                                                                                                                                                                                                                                                                                                                      | 623.56 | 4720.05 | 0.13 | < 1e-07  | < 1e-07  |
| 6387 | 7 | F2-3 vs. S2-3 | 247900_at  | AT5G57290 | transmembrane protein;(source:Araport11)                                                                                                                                                                                                                                                                                                                                                    | 134.51 | 1070.45 | 0.13 | 2.80E-06 | 3.09E-05 |
| 6388 | 7 | F2-3 vs. S2-3 | 257334_at  | ATMG01370 |                                                                                                                                                                                                                                                                                                                                                                                             | 31.58  | 235.64  | 0.13 | 1.20E-06 | 1.75E-05 |
| 6389 | 7 | F2-3 vs. S2-3 | 260257_at  | AT1G74340 | Encodes a subunit of the dolichol phosphate mannanase synthase (DPMS) complex that may serve as membrane anchors for the catalytic core, DPMS1, or provide catalytic assistance. It is localized in the ER and mediates isoprenyl-linked glycan biogenesis.                                                                                                                                 | 41.46  | 360.13  | 0.12 | 1.10E-06 | 1.64E-05 |
| 6390 | 7 | F2-3 vs. S2-3 | 263064_at  | AT2G18160 | Encodes a b-ZIP transcription factor.                                                                                                                                                                                                                                                                                                                                                       | 45.69  | 387.18  | 0.12 | 5.00E-07 | 9.67E-06 |
| 6391 | 7 | F2-3 vs. S2-3 | 258632_s_a | AT3G07980 | MAP3K epsilon protein kinase 2 is functionally redundant with MAP3Ke1. Required for pollen development but not essential.                                                                                                                                                                                                                                                                   | 34.79  | 300.78  | 0.12 | 1.16E-05 | 8.35E-05 |
| 6392 | 7 | F2-3 vs. S2-3 | 262609_at  | AT1G13930 | Involved in response to salt stress. Knockout mutants are hypersensitive to salt stress. The mRNA is cell-to-cell mobile.                                                                                                                                                                                                                                                                   | 51.92  | 452.08  | 0.11 | < 1e-07  | < 1e-07  |
| 6393 | 7 | F2-3 vs. S2-3 | 267239_at  | AT2G02510 | NADH dehydrogenase (ubiquinone)s;(source:Araport11)                                                                                                                                                                                                                                                                                                                                         | 109.53 | 984.95  | 0.11 | 1.00E-07 | 2.96E-06 |
| 6394 | 7 | F2-3 vs. S2-3 | 265481_at  | AT2G15960 | Unknown protein. Expression decreased in response to proline.                                                                                                                                                                                                                                                                                                                               | 49.85  | 454.4   | 0.11 | < 1e-07  | < 1e-07  |

|      |   |               |            |           |                                                                                                                                                                                                                                                                                                                                                                                                                                                                                            |        |         |       |          |          |
|------|---|---------------|------------|-----------|--------------------------------------------------------------------------------------------------------------------------------------------------------------------------------------------------------------------------------------------------------------------------------------------------------------------------------------------------------------------------------------------------------------------------------------------------------------------------------------------|--------|---------|-------|----------|----------|
|      |   |               |            |           | Belongs to the dehydrin protein family, which contains highly conserved stretches of 7-17 residues that are repetitively scattered in their sequences, the K-, S-, Y- and lysine rich segments. LTI29 and LTI30 double overexpressors confer freeze tolerance. Located in membranes. mRNA upregulated by water deprivation and abscisic acid. The mRNA is cell-to-cell mobile.                                                                                                             | 33.91  | 329.24  | 0.1   | 1.72E-04 | 5.88E-04 |
| 6395 | 7 | F2-3 vs. S2-3 | 252102_at  | AT3G50970 |                                                                                                                                                                                                                                                                                                                                                                                                                                                                                            |        |         |       |          |          |
| 6396 | 7 | F2-3 vs. S2-3 | 255807_at  | AT4G10270 | Member of the wound-induced polypeptide (WIP) family. Cytosolic ribosomal protein. Similar to EVR1 and redundant with EVR1. Also enhances VAR2 mutant variegation, but to a lesser extent than evr1.                                                                                                                                                                                                                                                                                       | 14.74  | 143.92  | 0.1   | 1.10E-06 | 1.64E-05 |
| 6397 | 7 | F2-3 vs. S2-3 | 246747_at  | AT5G27700 | serine carboxypeptidase-like 9;(source:Araport11)                                                                                                                                                                                                                                                                                                                                                                                                                                          | 193.15 | 1984.55 | 0.097 | < 1e-07  | < 1e-07  |
| 6398 | 7 | F2-3 vs. S2-3 | 267256_s_a | AT2G23010 |                                                                                                                                                                                                                                                                                                                                                                                                                                                                                            | 22.98  | 248.77  | 0.092 | 4.70E-06 | 4.42E-05 |
|      |   |               |            |           | Encodes a member of the YABBY family of transcriptional regulators that is involved in abaxial cell type specification in leaves and fruits. YAB1 acts in a non-cell autonomous fashion within the meristem to affect phyllotactic patterning. The non-autonomous effect on the central region of the meristem is mediated through the activity of Lateral Suppressor (LAS). Part of the AtHVA22 family. Protein expression is ABA- and stress-inducible. The mRNA is cell-to-cell mobile. |        |         |       |          |          |
| 6399 | 7 | F2-3 vs. S2-3 | 245138_at  | AT2G45190 |                                                                                                                                                                                                                                                                                                                                                                                                                                                                                            | 41.65  | 455.16  | 0.092 | < 1e-07  | 2.96E-06 |
| 6400 | 7 | F2-3 vs. S2-3 | 260368_at  | AT1G69700 | Encodes a GASA domain containing protein that regulates increases in plant growth through GA-induced and DELLA-dependent signal transduction and that can increase abiotic stress resistance by reducing ROS accumulation.                                                                                                                                                                                                                                                                 | 26.63  | 406.99  | 0.065 | 1.00E-07 | 2.96E-06 |
| 6401 | 7 | F2-3 vs. S2-3 | 246550_at  | AT5G14920 | aluminum induced protein with YGL and LRDR motifs;(source:Araport11)                                                                                                                                                                                                                                                                                                                                                                                                                       | 38.64  | 600.18  | 0.064 | 5.00E-07 | 9.67E-06 |
| 6402 | 7 | F2-3 vs. S2-3 | 253874_at  | AT4G27450 | Chloroplast encoded ribosomal protein S4                                                                                                                                                                                                                                                                                                                                                                                                                                                   | 55.42  | 880.13  | 0.063 | < 1e-07  | < 1e-07  |
| 6403 | 7 | F2-3 vs. S2-3 | 245009_at  | ATCG00380 | calnexin 1;(source:Araport11)                                                                                                                                                                                                                                                                                                                                                                                                                                                              | 70.96  | 1159.86 | 0.061 | < 1e-07  | < 1e-07  |
| 6404 | 7 | F2-3 vs. S2-3 | 247494_at  | AT5G61790 | Phosphorylase superfamily protein;(source:Araport11)                                                                                                                                                                                                                                                                                                                                                                                                                                       | 65.09  | 1105.77 | 0.059 | 2.00E-07 | 4.97E-06 |
| 6405 | 7 | F2-3 vs. S2-3 | 254163_s_a | AT4G24350 | MADS box gene negatively regulated by APETALA1                                                                                                                                                                                                                                                                                                                                                                                                                                             | 9.16   | 165.3   | 0.055 | < 1e-07  | < 1e-07  |
| 6406 | 7 | F2-3 vs. S2-3 | 247553_at  | AT5G60910 | Encodes a cytosolic 6-phosphogluconolactonase (PGL) thought to be involved in the oxidative pentose-phosphate pathway (OPPP). Similar to myrosinase binding proteins which may be involved in metabolizing glucosinolates and forming defense compounds to protect against herbivory. Also similar to lectins and other agglutinating factors. Expressed only in flowers.                                                                                                                  | 21.7   | 398.67  | 0.054 | < 1e-07  | < 1e-07  |
| 6407 | 7 | F2-3 vs. S2-3 | 249732_at  | AT5G24420 | Encodes a cytosolic 6-phosphogluconolactonase (PGL) thought to be involved in the oxidative pentose-phosphate pathway (OPPP). Bifunctional inhibitor/lipid-transfer protein/seed storage 2S albumin superfamily protein;(source:Araport11)                                                                                                                                                                                                                                                 | 10.1   | 195.99  | 0.052 | < 1e-07  | < 1e-07  |
| 6408 | 7 | F2-3 vs. S2-3 | 265058_s_a | AT1G52030 | Encodes a nitrile-specifier protein NSP4. NSP4 is one out of five (At3g16400/NSP1, At2g33070/NSP2, At3g16390/NSP3, At3g16410/NSP4 and At5g48180/NSP5) A. thaliana epithiospecifier protein (ESP) homologues that promote simple nitrile, but not epithionitrile or thiocyanate formation. The mRNA is cell-to-cell mobile.                                                                                                                                                                 | 127.46 | 2710.8  | 0.047 | < 1e-07  | < 1e-07  |
| 6409 | 7 | F2-3 vs. S2-3 | 252282_at  | AT3G49360 | Cellulase (glycosyl hydrolase family 5) protein;(source:Araport11)                                                                                                                                                                                                                                                                                                                                                                                                                         | 101.6  | 2524.14 | 0.04  | < 1e-07  | < 1e-07  |
| 6410 | 7 | F2-3 vs. S2-3 | 266123_at  | AT2G45180 |                                                                                                                                                                                                                                                                                                                                                                                                                                                                                            | 21.95  | 665.55  | 0.033 | < 1e-07  | < 1e-07  |
| 6411 | 7 | F2-3 vs. S2-3 | 259381_s_a | AT3G16410 |                                                                                                                                                                                                                                                                                                                                                                                                                                                                                            | 18.81  | 764.71  | 0.025 | < 1e-07  | < 1e-07  |
| 6412 | 7 | F2-3 vs. S2-3 | 257629_at  | AT3G26140 |                                                                                                                                                                                                                                                                                                                                                                                                                                                                                            | 36.12  | 1562.86 | 0.023 | < 1e-07  | < 1e-07  |
