# Supplementary material for: Whether Gametophytes Are Reduced or Unreduced in Angiosperms Might Be Determined Metabolically
Source: MDPI journal article supplement (doi:10.3390/genes11121449), 2020-12-02
Supplement: s1 [file s1]

**Table S8.** Enriched gene ontology terms (EGOs): +, genes upregulated in first taxon of each comparison; -, genes upregulated in second taxon of each comparison. GO terms are partitioned by groups and subgroups. L, *B. lignifera*; M, *B. microphylla*; F, *B. x formosa*; S, *B. stricta*; Stages: 1, megasporocyte (MMC); 2, meiocyte; 3, early gametophyte; 4, mature gametophyte.

| Test | Line no. | Comparison | up or down | GO group    | Go subgroup   | EGO term                                                      | GO no.     | GO type | Number of genes | p value  | FDR      |
|------|----------|------------|------------|-------------|---------------|---------------------------------------------------------------|------------|---------|-----------------|----------|----------|
| 1    | 1        | L1 vs. M1  | +          | Development | Cell division | nucleobase metabolic process                                  | GO:0009112 | P       | 29              | 1.69E-03 | 4.92E-02 |
| 1    | 2        | L1 vs. M1  | +          | Development | Cell division | SCF ubiquitin ligase complex                                  | GO:0019005 | C       | 49              | 3.72E-04 | 9.65E-03 |
| 1    | 3        | L1 vs. M1  | +          | Development | Development   | cytosol                                                       | GO:0005829 | C       | 2304            | 6.20E-05 | 2.35E-03 |
| 1    | 4        | L1 vs. M1  | +          | Development | Development   | extracellular space                                           | GO:0005615 | C       | 63              | 1.19E-03 | 2.55E-02 |
| 1    | 5        | L1 vs. M1  | +          | Development | Development   | lytic vacuole                                                 | GO:0000323 | C       | 37              | 1.36E-05 | 7.06E-04 |
| 1    | 6        | L1 vs. M1  | +          | Development | Development   | membrane                                                      | GO:0016020 | C       | 3472            | 1.13E-03 | 2.47E-02 |
| 1    | 7        | L1 vs. M1  | +          | Development | Development   | microbody                                                     | GO:0042579 | C       | 201             | 3.64E-08 | 3.99E-06 |
| 1    | 8        | L1 vs. M1  | +          | Development | Development   | plant-type vacuole                                            | GO:0000325 | C       | 107             | 1.04E-04 | 3.65E-03 |
| 1    | 9        | L1 vs. M1  | +          | Development | Development   | plasma membrane                                               | GO:0005886 | C       | 2248            | 2.62E-03 | 4.45E-02 |
| 1    | 10       | L1 vs. M1  | +          | Development | Development   | vacuole                                                       | GO:0005773 | C       | 736             | 9.05E-05 | 3.30E-03 |
| 1    | 11       | L1 vs. M1  | +          | Metabolism  | Bioenergetics | carbohydrate metabolic process                                | GO:0005975 | P       | 593             | 1.16E-03 | 3.60E-02 |
| 1    | 12       | L1 vs. M1  | +          | Metabolism  | Bioenergetics | cellular carbohydrate catabolic process                       | GO:0044275 | P       | 34              | 4.39E-06 | 4.12E-04 |
| 1    | 13       | L1 vs. M1  | +          | Metabolism  | Bioenergetics | cellular carbohydrate metabolic process                       | GO:0044262 | P       | 262             | 2.69E-04 | 1.14E-02 |
| 1    | 14       | L1 vs. M1  | +          | Metabolism  | Bioenergetics | disaccharide metabolic process                                | GO:0005984 | P       | 50              | 6.28E-04 | 2.34E-02 |
| 1    | 15       | L1 vs. M1  | +          | Metabolism  | Bioenergetics | fatty acid beta-oxidation                                     | GO:0006635 | P       | 26              | 4.04E-05 | 2.52E-03 |
| 1    | 16       | L1 vs. M1  | +          | Metabolism  | Bioenergetics | fatty acid catabolic process                                  | GO:0009062 | P       | 27              | 1.52E-05 | 1.10E-03 |
| 1    | 17       | L1 vs. M1  | +          | Metabolism  | Bioenergetics | fatty acid oxidation                                          | GO:0019395 | P       | 28              | 3.88E-04 | 1.57E-02 |
| 1    | 18       | L1 vs. M1  | +          | Metabolism  | Bioenergetics | lipid oxidation                                               | GO:0034440 | P       | 36              | 1.73E-03 | 4.97E-02 |
| 1    | 19       | L1 vs. M1  | +          | Metabolism  | Bioenergetics | oligosaccharide metabolic process                             | GO:0009311 | P       | 57              | 7.96E-04 | 2.74E-02 |
| 1    | 20       | L1 vs. M1  | +          | Metabolism  | Bioenergetics | oxidoreductase activity, acting on CH-OH group of donors      | GO:0016614 | F       | 141             | 2.04E-04 | 2.97E-02 |
|      |          |            |            |             |               | oxidoreductase activity, acting on the CH-OH group of donors, |            |         |                 |          |          |
| 1    | 21       | L1 vs. M1  | +          | Metabolism  | Bioenergetics | NAD or NADP as acceptor                                       | GO:0016616 | F       | 124             | 2.98E-05 | 6.66E-03 |
| 1    | 22       | L1 vs. M1  | +          | Metabolism  | Bioenergetics | proton-transporting V-type ATPase complex                     | GO:0033176 | C       | 16              | 2.90E-03 | 4.85E-02 |
| 1    | 23       | L1 vs. M1  | +          | Metabolism  | Catabolism    | alpha-amino acid catabolic process                            | GO:1901606 | P       | 64              | 5.67E-08 | 1.43E-05 |
| 1    | 24       | L1 vs. M1  | +          | Metabolism  | Catabolism    | branched-chain amino acid catabolic process                   | GO:0009083 | P       | 20              | 7.33E-04 | 2.57E-02 |
| 1    | 25       | L1 vs. M1  | +          | Metabolism  | Catabolism    | carboxylic acid catabolic process                             | GO:0046395 | P       | 117             | 7.44E-13 | 5.89E-10 |
| 1    | 26       | L1 vs. M1  | +          | Metabolism  | Catabolism    | catabolic process                                             | GO:0009056 | P       | 935             | 2.22E-16 | 6.15E-13 |
| 1    | 27       | L1 vs. M1  | +          | Metabolism  | Catabolism    | cellular amino acid catabolic process                         | GO:0009063 | P       | 72              | 2.14E-08 | 6.59E-06 |
| 1    | 28       | L1 vs. M1  | +          | Metabolism  | Catabolism    | cellular catabolic process                                    | GO:0044248 | P       | 785             | 0.00E+00 | 0.00E+00 |
| 1    | 29       | L1 vs. M1  | +          | Metabolism  | Catabolism    | cellular lipid catabolic process                              | GO:0044242 | P       | 64              | 3.57E-06 | 3.54E-04 |
| 1    | 30       | L1 vs. M1  | +          | Metabolism  | Catabolism    | cellular macromolecule catabolic process                      | GO:0044265 | P       | 467             | 4.23E-06 | 4.11E-04 |
| 1    | 31       | L1 vs. M1  | +          | Metabolism  | Catabolism    | cellular protein catabolic process                            | GO:0044257 | P       | 369             | 1.74E-06 | 2.05E-04 |
| 1    | 32       | L1 vs. M1  | +          | Metabolism  | Catabolism    | extrinsic component of membrane                               | GO:0019898 | C       | 50              | 2.59E-03 | 4.48E-02 |
| 1    | 33       | L1 vs. M1  | +          | Metabolism  | Catabolism    | lipid catabolic process                                       | GO:0016042 | P       | 70              | 2.35E-05 | 1.52E-03 |
| 1    | 34       | L1 vs. M1  | +          | Metabolism  | Catabolism    | lysosome                                                      | GO:0005764 | C       | 34              | 1.36E-04 | 4.46E-03 |
| 1    | 35       | L1 vs. M1  | +          | Metabolism  | Catabolism    | macromolecule catabolic process                               | GO:0009057 | P       | 556             | 1.97E-06 | 2.23E-04 |
| 1    | 36       | L1 vs. M1  | +          | Metabolism  | Catabolism    | modification-dependent protein catabolic process              | GO:0019941 | P       | 312             | 1.23E-03 | 3.79E-02 |
| 1    | 37       | L1 vs. M1  | +          | Metabolism  | Catabolism    | monocarboxylic acid catabolic process                         | GO:0072329 | P       | 44              | 4.40E-06 | 4.07E-04 |
| 1    | 38       | L1 vs. M1  | +          | Metabolism  | Catabolism    | organic acid catabolic process                                | GO:0016054 | P       | 117             | 7.44E-13 | 6.87E-10 |
| 1    | 39       | L1 vs. M1  | +          | Metabolism  | Catabolism    | organic substance catabolic process                           | GO:1901575 | P       | 861             | 6.44E-15 | 1.19E-11 |
| 1    | 40       | L1 vs. M1  | +          | Metabolism  | Catabolism    | organonitrogen compound catabolic process                     | GO:1901565 | P       | 524             | 5.46E-11 | 3.03E-08 |
| 1    | 41       | L1 vs. M1  | +          | Metabolism  | Catabolism    | peroxisome                                                    | GO:0005777 | C       | 201             | 3.64E-08 | 3.59E-06 |
| 1    | 42       | L1 vs. M1  | +          | Metabolism  | Catabolism    | peroxisome organization                                       | GO:0007031 | P       | 25              | 5.04E-04 | 1.98E-02 |
| 1    | 43       | L1 vs. M1  | +          | Metabolism  | Catabolism    | proteasomal protein catabolic process                         | GO:0010498 | P       | 171             | 1.75E-03 | 5.00E-02 |
| 1    | 44       | L1 vs. M1  | +          | Metabolism  | Catabolism    | protein catabolic process                                     | GO:0030163 | P       | 380             | 1.73E-06 | 2.08E-04 |
| 1    | 45       | L1 vs. M1  | +          | Metabolism  | Catabolism    | protein ubiquitination                                        | GO:0016567 | P       | 362             | 1.15E-05 | 8.58E-04 |
| 1    | 46       | L1 vs. M1  | +          | Metabolism  | Catabolism    | proteolysis                                                   | GO:0006508 | P       | 500             | 9.80E-06 | 7.55E-04 |
| 1    | 47       | L1 vs. M1  | +          | Metabolism  | Catabolism    | proteolysis involved in cellular protein catabolic process    | GO:0051603 | P       | 361             | 4.58E-06 | 4.16E-04 |
|      |          |            |            |             |               | SCF-dependent proteasomal ubiquitin-dependent protein         |            |         |                 |          |          |
| 1    | 48       | L1 vs. M1  | +          | Metabolism  | Catabolism    | catabolic process                                             | GO:0031146 | P       | 46              | 9.88E-05 | 5.26E-03 |
| 1    | 49       | L1 vs. M1  | +          | Metabolism  | Catabolism    | small molecule catabolic process                              | GO:0044282 | P       | 168             | 2.54E-14 | 3.52E-11 |
| 1    | 50       | L1 vs. M1  | +          | Metabolism  | Catabolism    | ubiquitin-dependent protein catabolic process                 | GO:0006511 | P       | 307             | 6.38E-04 | 2.36E-02 |
| 1    | 51       | L1 vs. M1  | +          | Metabolism  | Catabolism    | ubiquitin-like protein transferase activity                   | GO:0019787 | F       | 253             | 2.81E-05 | 7.43E-03 |
| 1    | 52       | L1 vs. M1  | +          | Metabolism  | Catabolism    | ubiquitin-protein transferase activity                        | GO:0004842 | F       | 249             | 1.42E-05 | 4.58E-03 |
| 1    | 53       | L1 vs. M1  | +          | Metabolism  | Metabolism    | alcohol metabolic process                                     | GO:0006066 | P       | 77              | 1.76E-03 | 4.98E-02 |
| 1    | 54       | L1 vs. M1  | +          | Metabolism  | Metabolism    | alpha-amino acid metabolic process                            | GO:1901605 | P       | 206             | 1.03E-06 | 1.32E-04 |
| 1    | 55       | L1 vs. M1  | +          | Metabolism  | Metabolism    | amine metabolic process                                       | GO:0009308 | P       | 67              | 1.54E-03 | 4.56E-02 |
| 1    | 56       | L1 vs. M1  | +          | Metabolism  | Metabolism    | carboxylic acid metabolic process                             | GO:0019752 | P       | 642             | 6.03E-08 | 1.45E-05 |
| 1    | 57       | L1 vs. M1  | +          | Metabolism  | Metabolism    | catalytic activity                                            | GO:0003824 | F       | 4992            | 1.79E-05 | 5.21E-03 |

|   |     |           |   |                        |                      |                                                              |            |   |      |          |          |
|---|-----|-----------|---|------------------------|----------------------|--------------------------------------------------------------|------------|---|------|----------|----------|
| 1 | 58  | L1 vs. M1 | + | Metabolism             | Metabolism           | catalytic activity, acting on a protein                      | GO:0140096 | F | 1414 | 1.33E-05 | 4.84E-03 |
| 1 | 59  | L1 vs. M1 | + | Metabolism             | Metabolism           | cellular amino acid metabolic process                        | GO:0006520 | P | 278  | 3.21E-07 | 5.56E-05 |
| 1 | 60  | L1 vs. M1 | + | Metabolism             | Metabolism           | cellular ketone metabolic process                            | GO:0042180 | P | 41   | 1.46E-04 | 7.10E-03 |
| 1 | 61  | L1 vs. M1 | + | Metabolism             | Metabolism           | cellular protein modification process                        | GO:0006464 | P | 1414 | 2.00E-04 | 8.85E-03 |
| 1 | 62  | L1 vs. M1 | + | Metabolism             | Metabolism           | dicarboxylic acid metabolic process                          | GO:0043648 | P | 66   | 1.10E-03 | 3.58E-02 |
| 1 | 63  | L1 vs. M1 | + | Metabolism             | Metabolism           | galactose metabolic process                                  | GO:0006012 | P | 18   | 1.50E-03 | 4.48E-02 |
| 1 | 64  | L1 vs. M1 | + | Metabolism             | Metabolism           | glutamate metabolic process                                  | GO:0006536 | P | 21   | 1.61E-03 | 4.73E-02 |
| 1 | 65  | L1 vs. M1 | + | Metabolism             | Metabolism           | glutamine family amino acid metabolic process                | GO:0009064 | P | 45   | 1.39E-03 | 4.25E-02 |
| 1 | 66  | L1 vs. M1 | + | Metabolism             | Metabolism           | lipid modification                                           | GO:0030258 | P | 69   | 9.49E-06 | 7.63E-04 |
| 1 | 67  | L1 vs. M1 | + | Metabolism             | Metabolism           | organic acid metabolic process                               | GO:0006082 | P | 706  | 9.67E-08 | 2.06E-05 |
| 1 | 68  | L1 vs. M1 | + | Metabolism             | Metabolism           | organic hydroxy compound metabolic process                   | GO:1901615 | P | 190  | 5.66E-05 | 3.34E-03 |
| 1 | 69  | L1 vs. M1 | + | Metabolism             | Metabolism           | organonitrogen compound metabolic process                    | GO:1901564 | P | 2816 | 3.62E-05 | 2.28E-03 |
| 1 | 70  | L1 vs. M1 | + | Metabolism             | Metabolism           | oxoacid metabolic process                                    | GO:0043436 | P | 703  | 1.97E-07 | 3.89E-05 |
| 1 | 71  | L1 vs. M1 | + | Metabolism             | Metabolism           | phosphate-containing compound metabolic process              | GO:0006796 | P | 1147 | 1.76E-03 | 5.01E-02 |
| 1 | 72  | L1 vs. M1 | + | Metabolism             | Metabolism           | phosphatidylinositol metabolic process                       | GO:0046488 | P | 54   | 5.57E-04 | 2.11E-02 |
| 1 | 73  | L1 vs. M1 | + | Metabolism             | Metabolism           | phosphoric ester hydrolase activity                          | GO:0042578 | F | 238  | 7.65E-07 | 4.45E-04 |
| 1 | 74  | L1 vs. M1 | + | Metabolism             | Metabolism           | phosphorus metabolic process                                 | GO:0006793 | P | 1182 | 1.15E-03 | 3.60E-02 |
| 1 | 75  | L1 vs. M1 | + | Metabolism             | Metabolism           | pigment biosynthetic process                                 | GO:0046148 | P | 78   | 5.20E-06 | 4.44E-04 |
| 1 | 76  | L1 vs. M1 | + | Metabolism             | Metabolism           | pigment metabolic process                                    | GO:0042440 | P | 93   | 9.23E-06 | 7.53E-04 |
| 1 | 77  | L1 vs. M1 | + | Metabolism             | Metabolism           | protein binding                                              | GO:0005515 | F | 3306 | 2.89E-05 | 7.00E-03 |
| 1 | 78  | L1 vs. M1 | + | Metabolism             | Metabolism           | small molecule biosynthetic process                          | GO:0044283 | P | 449  | 2.60E-04 | 1.12E-02 |
| 1 | 79  | L1 vs. M1 | + | Metabolism             | Metabolism           | small molecule metabolic process                             | GO:0044281 | P | 1035 | 3.26E-08 | 9.52E-06 |
| 1 | 80  | L1 vs. M1 | + | Metabolism             | Photosynthesis       | chloroplast envelope                                         | GO:0009941 | C | 474  | 1.84E-04 | 5.50E-03 |
| 1 | 81  | L1 vs. M1 | + | Metabolism             | Photosynthesis       | chloroplast stroma                                           | GO:0009570 | C | 548  | 3.65E-05 | 1.72E-03 |
| 1 | 82  | L1 vs. M1 | + | Metabolism             | Photosynthesis       | plastid                                                      | GO:0009536 | C | 3328 | 2.43E-03 | 4.36E-02 |
| 1 | 83  | L1 vs. M1 | + | Metabolism             | Photosynthesis       | plastid envelope                                             | GO:0009526 | C | 490  | 2.95E-04 | 8.56E-03 |
| 1 | 84  | L1 vs. M1 | + | Metabolism             | Photosynthesis       | plastid stroma                                               | GO:0009532 | C | 557  | 1.74E-04 | 5.37E-03 |
| 1 | 85  | L1 vs. M1 | + | Metabolism             | Transporters         | active ion transmembrane transporter activity                | GO:0022853 | F | 146  | 2.49E-04 | 3.45E-02 |
| 1 | 86  | L1 vs. M1 | + | Metabolism             | Transporters         | establishment of protein localization to peroxisome          | GO:0072663 | P | 10   | 8.41E-04 | 2.86E-02 |
| 1 | 87  | L1 vs. M1 | + | Metabolism             | Transporters         | protein localization to peroxisome                           | GO:0072662 | P | 10   | 8.41E-04 | 2.84E-02 |
| 1 | 88  | L1 vs. M1 | + | Metabolism             | Transporters         | protein targeting to peroxisome                              | GO:0006625 | P | 10   | 8.41E-04 | 2.88E-02 |
| 1 | 89  | L1 vs. M1 | + | Metabolism             | Transporters         | transporter activity                                         | GO:0005215 | F | 816  | 1.95E-04 | 2.99E-02 |
| 1 | 90  | L1 vs. M1 | + | Metabolism             | Transporters         | water channel activity                                       | GO:0015250 | F | 23   | 1.68E-04 | 2.88E-02 |
| 1 | 91  | L1 vs. M1 | + | Metabolism             | Transporters         | water transmembrane transporter activity                     | GO:0005372 | F | 23   | 1.68E-04 | 3.06E-02 |
| 1 | 92  | L1 vs. M1 | + | Regulation             | Protein modification | protein modification by small protein conjugation            | GO:0032446 | P | 380  | 4.31E-06 | 4.11E-04 |
| 1 | 93  | L1 vs. M1 | + | Regulation             | Protein modification | protein modification by small protein conjugation or removal | GO:0070647 | P | 432  | 5.28E-06 | 4.43E-04 |
| 1 | 94  | L1 vs. M1 | + | Regulation             | Protein modification | protein modification process                                 | GO:0036211 | P | 1414 | 2.00E-04 | 8.92E-03 |
| 1 | 95  | L1 vs. M1 | + | Signaling and response | Signaling            | cellular response to abiotic stimulus                        | GO:0071214 | P | 127  | 6.45E-04 | 2.34E-02 |
| 1 | 96  | L1 vs. M1 | + | Signaling and response | Signaling            | cellular response to environmental stimulus                  | GO:0104004 | P | 127  | 6.45E-04 | 2.35E-02 |
| 1 | 97  | L1 vs. M1 | + | Signaling and response | Signaling            | cellular response to external stimulus                       | GO:0071496 | P | 151  | 1.08E-04 | 5.72E-03 |
| 1 | 98  | L1 vs. M1 | + | Signaling and response | Signaling            | cellular response to extracellular stimulus                  | GO:0031668 | P | 146  | 1.20E-04 | 6.16E-03 |
| 1 | 99  | L1 vs. M1 | + | Signaling and response | Signaling            | cellular response to lipid                                   | GO:0071396 | P | 156  | 9.87E-04 | 3.27E-02 |
| 1 | 100 | L1 vs. M1 | + | Signaling and response | Signaling            | cellular response to nitrogen levels                         | GO:0043562 | P | 27   | 4.80E-04 | 1.91E-02 |
| 1 | 101 | L1 vs. M1 | + | Signaling and response | Signaling            | circadian rhythm                                             | GO:0007623 | P | 79   | 4.88E-06 | 4.36E-04 |
| 1 | 102 | L1 vs. M1 | + | Signaling and response | Signaling            | dephosphorylation                                            | GO:0016311 | P | 121  | 3.52E-06 | 3.54E-04 |
| 1 | 103 | L1 vs. M1 | + | Signaling and response | Signaling            | phosphatase activity                                         | GO:0016791 | F | 202  | 1.13E-08 | 1.10E-05 |
| 1 | 104 | L1 vs. M1 | + | Signaling and response | Signaling            | phosphoprotein phosphatase activity                          | GO:0004721 | F | 110  | 3.12E-08 | 2.27E-05 |
| 1 | 105 | L1 vs. M1 | + | Signaling and response | Signaling            | protein dephosphorylation                                    | GO:0006470 | P | 81   | 1.57E-05 | 1.13E-03 |
| 1 | 106 | L1 vs. M1 | + | Signaling and response | Signaling            | protein serine/threonine phosphatase activity                | GO:0004722 | F | 74   | 9.67E-06 | 4.01E-03 |
| 1 | 107 | L1 vs. M1 | + | Signaling and response | Signaling            | regulation of circadian rhythm                               | GO:0042752 | P | 37   | 1.42E-04 | 6.99E-03 |
| 1 | 108 | L1 vs. M1 | + | Signaling and response | Signaling            | response to abiotic stimulus                                 | GO:0009628 | P | 1362 | 3.30E-06 | 3.39E-04 |
| 1 | 109 | L1 vs. M1 | + | Signaling and response | Signaling            | response to acid chemical                                    | GO:0001101 | P | 267  | 5.39E-04 | 2.09E-02 |
| 1 | 110 | L1 vs. M1 | + | Signaling and response | Signaling            | response to chemical                                         | GO:0042221 | P | 1717 | 6.56E-06 | 5.43E-04 |
| 1 | 111 | L1 vs. M1 | + | Signaling and response | Signaling            | response to endogenous stimulus                              | GO:0009719 | P | 804  | 1.31E-04 | 6.61E-03 |
| 1 | 112 | L1 vs. M1 | + | Signaling and response | Signaling            | response to extracellular stimulus                           | GO:0009991 | P | 177  | 1.04E-05 | 7.87E-04 |
| 1 | 113 | L1 vs. M1 | + | Signaling and response | Signaling            | response to hormone                                          | GO:0009725 | P | 787  | 7.30E-05 | 4.09E-03 |
| 1 | 114 | L1 vs. M1 | + | Signaling and response | Signaling            | response to inorganic substance                              | GO:0010035 | P | 631  | 1.31E-05 | 9.71E-04 |
| 1 | 115 | L1 vs. M1 | + | Signaling and response | Signaling            | response to light intensity                                  | GO:0009642 | P | 102  | 1.87E-04 | 8.50E-03 |
| 1 | 116 | L1 vs. M1 | + | Signaling and response | Signaling            | response to light stimulus                                   | GO:0009416 | P | 451  | 2.35E-05 | 1.53E-03 |
| 1 | 117 | L1 vs. M1 | + | Signaling and response | Signaling            | response to lipid                                            | GO:0033993 | P | 433  | 2.34E-07 | 4.19E-05 |
| 1 | 118 | L1 vs. M1 | + | Signaling and response | Signaling            | response to nutrient levels                                  | GO:0031667 | P | 147  | 1.84E-04 | 8.44E-03 |
| 1 | 119 | L1 vs. M1 | + | Signaling and response | Signaling            | response to organic substance                                | GO:0010033 | P | 1069 | 2.05E-04 | 9.01E-03 |
| 1 | 120 | L1 vs. M1 | + | Signaling and response | Signaling            | response to oxygen-containing compound                       | GO:1901700 | P | 956  | 3.60E-07 | 6.04E-05 |
| 1 | 121 | L1 vs. M1 | + | Signaling and response | Signaling            | response to stimulus                                         | GO:0050896 | P | 3374 | 1.42E-03 | 4.30E-02 |

|   |     |           |   |                        |               |                                                         |            |   |      |          |          |
|---|-----|-----------|---|------------------------|---------------|---------------------------------------------------------|------------|---|------|----------|----------|
| 1 | 122 | L1 vs. M1 | + | Signaling and response | Signaling     | response to water                                       | GO:0009415 | P | 246  | 1.35E-04 | 6.75E-03 |
| 1 | 123 | L1 vs. M1 | + | Signaling and response | Signaling     | rhythmic process                                        | GO:0048511 | P | 79   | 4.88E-06 | 4.29E-04 |
| 1 | 124 | L1 vs. M1 | + | Signaling and response | Stress        | cellular monovalent inorganic cation homeostasis        | GO:0030004 | P | 30   | 1.55E-04 | 7.35E-03 |
| 1 | 125 | L1 vs. M1 | + | Signaling and response | Stress        | hyperosmotic response                                   | GO:0006972 | P | 47   | 6.86E-04 | 2.44E-02 |
| 1 | 126 | L1 vs. M1 | + | Signaling and response | Stress        | monovalent inorganic cation homeostasis                 | GO:0055067 | P | 50   | 1.83E-04 | 8.43E-03 |
| 1 | 127 | L1 vs. M1 | + | Signaling and response | Stress        | potassium ion homeostasis                               | GO:0055075 | P | 15   | 6.53E-04 | 2.34E-02 |
| 1 | 128 | L1 vs. M1 | + | Signaling and response | Stress        | regulation of abscisic acid-activated signaling pathway | GO:0009787 | P | 80   | 2.70E-04 | 1.13E-02 |
| 1 | 129 | L1 vs. M1 | + | Signaling and response | Stress        | regulation of cellular pH                               | GO:0030641 | P | 21   | 5.47E-04 | 2.10E-02 |
| 1 | 130 | L1 vs. M1 | + | Signaling and response | Stress        | regulation of cellular response to alcohol              | GO:1905957 | P | 80   | 2.70E-04 | 1.13E-02 |
| 1 | 131 | L1 vs. M1 | + | Signaling and response | Stress        | regulation of intracellular pH                          | GO:0051453 | P | 21   | 5.47E-04 | 2.09E-02 |
| 1 | 132 | L1 vs. M1 | + | Signaling and response | Stress        | regulation of reactive oxygen species metabolic process | GO:2000377 | P | 39   | 9.78E-04 | 3.29E-02 |
| 1 | 133 | L1 vs. M1 | + | Signaling and response | Stress        | regulation of response to alcohol                       | GO:1901419 | P | 80   | 2.70E-04 | 1.12E-02 |
| 1 | 134 | L1 vs. M1 | + | Signaling and response | Stress        | regulation of stomatal closure                          | GO:0090333 | P | 17   | 1.72E-03 | 4.96E-02 |
| 1 | 135 | L1 vs. M1 | + | Signaling and response | Stress        | regulation of stomatal movement                         | GO:0010119 | P | 57   | 6.10E-05 | 3.49E-03 |
| 1 | 136 | L1 vs. M1 | + | Signaling and response | Stress        | response to abscisic acid                               | GO:0009737 | P | 328  | 4.73E-07 | 7.09E-05 |
| 1 | 137 | L1 vs. M1 | + | Signaling and response | Stress        | response to absence of light                            | GO:0009646 | P | 26   | 2.12E-05 | 1.45E-03 |
| 1 | 138 | L1 vs. M1 | + | Signaling and response | Stress        | response to alcohol                                     | GO:0097305 | P | 331  | 6.99E-07 | 9.68E-05 |
| 1 | 139 | L1 vs. M1 | + | Signaling and response | Stress        | response to osmotic stress                              | GO:0006970 | P | 356  | 1.80E-04 | 8.40E-03 |
| 1 | 140 | L1 vs. M1 | + | Signaling and response | Stress        | response to radiation                                   | GO:0009314 | P | 471  | 2.85E-04 | 1.17E-02 |
| 1 | 141 | L1 vs. M1 | + | Signaling and response | Stress        | response to salt stress                                 | GO:0009651 | P | 298  | 9.91E-04 | 3.27E-02 |
| 1 | 142 | L1 vs. M1 | + | Signaling and response | Stress        | response to water deprivation                           | GO:0009414 | P | 242  | 1.38E-04 | 6.81E-03 |
| 1 | 143 | L1 vs. M1 | + | Signaling and response | Stress        | vitamin biosynthetic process                            | GO:0009110 | P | 43   | 2.65E-04 | 1.13E-02 |
| 1 | 144 | L1 vs. M1 | + | Signaling and response | Stress        | vitamin metabolic process                               | GO:0006766 | P | 52   | 1.15E-03 | 3.62E-02 |
| 1 | 145 | L1 vs. M1 | - | Development            | Cell division | cell cycle                                              | GO:0007049 | P | 292  | 2.77E-11 | 1.71E-08 |
| 1 | 146 | L1 vs. M1 | - | Development            | Cell division | cell cycle G1/S phase transition                        | GO:0044843 | P | 7    | 5.85E-05 | 3.38E-03 |
| 1 | 147 | L1 vs. M1 | - | Development            | Cell division | cell cycle phase transition                             | GO:0044770 | P | 28   | 4.45E-05 | 2.68E-03 |
| 1 | 148 | L1 vs. M1 | - | Development            | Cell division | cell cycle process                                      | GO:0022402 | P | 268  | 8.02E-10 | 3.70E-07 |
| 1 | 149 | L1 vs. M1 | - | Development            | Cell division | chromosome                                              | GO:0005694 | C | 289  | 7.42E-04 | 1.88E-02 |
| 1 | 150 | L1 vs. M1 | - | Development            | Cell division | chromosome organization involved in meiotic cell cycle  | GO:0070192 | P | 30   | 4.38E-04 | 1.76E-02 |
| 1 | 151 | L1 vs. M1 | - | Development            | Cell division | chromosome segregation                                  | GO:0007059 | P | 67   | 9.71E-06 | 7.58E-04 |
| 1 | 152 | L1 vs. M1 | - | Development            | Cell division | condensed chromosome                                    | GO:0000793 | C | 39   | 3.32E-05 | 1.64E-03 |
| 1 | 153 | L1 vs. M1 | - | Development            | Cell division | condensed nuclear chromosome                            | GO:0000794 | C | 26   | 9.00E-04 | 2.11E-02 |
| 1 | 154 | L1 vs. M1 | - | Development            | Cell division | condensin complex                                       | GO:0000796 | C | 7    | 2.05E-03 | 3.82E-02 |
| 1 | 155 | L1 vs. M1 | - | Development            | Cell division | cyclin-dependent protein kinase holoenzyme complex      | GO:0000307 | C | 36   | 1.91E-03 | 3.63E-02 |
| 1 | 156 | L1 vs. M1 | - | Development            | Cell division | DNA biosynthetic process                                | GO:0071897 | P | 17   | 6.08E-04 | 2.29E-02 |
| 1 | 157 | L1 vs. M1 | - | Development            | Cell division | DNA packaging complex                                   | GO:0044815 | C | 19   | 1.02E-03 | 2.30E-02 |
| 1 | 158 | L1 vs. M1 | - | Development            | Cell division | DNA polymerase complex                                  | GO:0042575 | C | 15   | 1.01E-03 | 2.32E-02 |
| 1 | 159 | L1 vs. M1 | - | Development            | Cell division | DNA recombination                                       | GO:0006310 | P | 84   | 8.26E-07 | 1.09E-04 |
| 1 | 160 | L1 vs. M1 | - | Development            | Cell division | DNA replication                                         | GO:0006260 | P | 82   | 7.19E-08 | 1.66E-05 |
| 1 | 161 | L1 vs. M1 | - | Development            | Cell division | DNA-dependent DNA replication                           | GO:0006261 | P | 73   | 2.24E-07 | 4.14E-05 |
| 1 | 162 | L1 vs. M1 | - | Development            | Cell division | double-strand break repair                              | GO:0006302 | P | 79   | 1.57E-06 | 1.98E-04 |
| 1 | 163 | L1 vs. M1 | - | Development            | Cell division | G1/S transition of mitotic cell cycle                   | GO:0000082 | P | 6    | 1.53E-04 | 7.33E-03 |
| 1 | 164 | L1 vs. M1 | - | Development            | Cell division | homologous chromosome pairing at meiosis                | GO:0007129 | P | 17   | 1.33E-03 | 4.07E-02 |
| 1 | 165 | L1 vs. M1 | - | Development            | Cell division | homologous chromosome segregation                       | GO:0045143 | P | 20   | 1.04E-03 | 3.40E-02 |
| 1 | 166 | L1 vs. M1 | - | Development            | Cell division | homologous recombination                                | GO:0035825 | P | 27   | 1.12E-03 | 3.54E-02 |
| 1 | 167 | L1 vs. M1 | - | Development            | Cell division | meiosis I                                               | GO:0007127 | P | 36   | 1.98E-04 | 8.94E-03 |
| 1 | 168 | L1 vs. M1 | - | Development            | Cell division | meiosis I cell cycle process                            | GO:0061982 | P | 40   | 6.10E-04 | 2.28E-02 |
| 1 | 169 | L1 vs. M1 | - | Development            | Cell division | meiotic cell cycle                                      | GO:0051321 | P | 99   | 2.07E-06 | 2.29E-04 |
| 1 | 170 | L1 vs. M1 | - | Development            | Cell division | meiotic cell cycle process                              | GO:1903046 | P | 88   | 1.73E-05 | 1.21E-03 |
| 1 | 171 | L1 vs. M1 | - | Development            | Cell division | meiotic chromosome segregation                          | GO:0045132 | P | 33   | 7.90E-04 | 2.75E-02 |
| 1 | 172 | L1 vs. M1 | - | Development            | Cell division | meiotic nuclear division                                | GO:0140013 | P | 54   | 4.94E-05 | 2.94E-03 |
| 1 | 173 | L1 vs. M1 | - | Development            | Cell division | microtubule motor activity                              | GO:0003777 | F | 38   | 7.26E-06 | 3.52E-03 |
| 1 | 174 | L1 vs. M1 | - | Development            | Cell division | mitotic cell cycle                                      | GO:0000278 | P | 160  | 8.08E-10 | 3.44E-07 |
| 1 | 175 | L1 vs. M1 | - | Development            | Cell division | mitotic cell cycle phase transition                     | GO:0044772 | P | 27   | 9.76E-05 | 5.25E-03 |
| 1 | 176 | L1 vs. M1 | - | Development            | Cell division | mitotic cell cycle process                              | GO:1903047 | P | 130  | 1.58E-09 | 5.84E-07 |
| 1 | 177 | L1 vs. M1 | - | Development            | Cell division | nuclear chromosome segregation                          | GO:0098813 | P | 60   | 9.56E-06 | 7.57E-04 |
| 1 | 178 | L1 vs. M1 | - | Development            | Cell division | nuclear division                                        | GO:0000280 | P | 89   | 4.32E-07 | 6.65E-05 |
| 1 | 179 | L1 vs. M1 | - | Development            | Cell division | nuclear DNA replication                                 | GO:0033260 | P | 13   | 6.53E-04 | 2.35E-02 |
| 1 | 180 | L1 vs. M1 | - | Development            | Cell division | nuclear replication fork                                | GO:0043596 | C | 18   | 4.39E-05 | 1.80E-03 |
| 1 | 181 | L1 vs. M1 | - | Development            | Cell division | nucleic acid metabolic process                          | GO:0090304 | P | 1011 | 5.66E-07 | 8.04E-05 |
| 1 | 182 | L1 vs. M1 | - | Development            | Cell division | nucleobase-containing compound metabolic process        | GO:0006139 | P | 1292 | 9.50E-05 | 5.16E-03 |
| 1 | 183 | L1 vs. M1 | - | Development            | Cell division | reciprocal homologous recombination                     | GO:0140527 | P | 27   | 1.12E-03 | 3.58E-02 |
| 1 | 184 | L1 vs. M1 | - | Development            | Cell division | reciprocal meiotic recombination                        | GO:0007131 | P | 27   | 1.12E-03 | 3.56E-02 |
| 1 | 185 | L1 vs. M1 | - | Development            | Cell division | recombinational repair                                  | GO:0000725 | P | 55   | 1.58E-03 | 4.67E-02 |



|   |     |           |   |             |                      |                                                                |            |   |      |          |          |
|---|-----|-----------|---|-------------|----------------------|----------------------------------------------------------------|------------|---|------|----------|----------|
| 1 | 186 | L1 vs. M1 | - | Development | Cell division        | regulation of cell cycle                                       | GO:0051726 | P | 142  | 1.17E-03 | 3.63E-02 |
| 1 | 187 | L1 vs. M1 | - | Development | Cell division        | replication fork                                               | GO:0005657 | C | 31   | 3.27E-04 | 8.95E-03 |
| 1 | 188 | L1 vs. M1 | - | Development | Cell division        | replisome                                                      | GO:0030894 | C | 16   | 4.37E-05 | 1.87E-03 |
| 1 | 189 | L1 vs. M1 | - | Development | Cell division        | RNA metabolic process                                          | GO:0016070 | P | 764  | 2.33E-04 | 1.01E-02 |
| 1 | 190 | L1 vs. M1 | - | Development | Development          | anchored component of membrane                                 | GO:0031225 | C | 171  | 3.04E-03 | 4.99E-02 |
| 1 | 191 | L1 vs. M1 | - | Development | Development          | anchored component of plasma membrane                          | GO:0046658 | C | 96   | 8.93E-04 | 2.15E-02 |
| 1 | 192 | L1 vs. M1 | - | Development | Development          | cellular component biogenesis                                  | GO:0044085 | P | 829  | 2.14E-05 | 1.44E-03 |
| 1 | 193 | L1 vs. M1 | - | Development | Development          | cellular component organization or biogenesis                  | GO:0071840 | P | 1745 | 1.15E-04 | 5.94E-03 |
| 1 | 194 | L1 vs. M1 | - | Development | Development          | chromosome organization                                        | GO:0051276 | P | 301  | 1.61E-04 | 7.58E-03 |
| 1 | 195 | L1 vs. M1 | - | Development | Development          | intracellular non-membrane-bounded organelle                   | GO:0043232 | C | 1113 | 1.43E-14 | 7.06E-12 |
| 1 | 196 | L1 vs. M1 | - | Development | Development          | intracellular organelle lumen                                  | GO:0070013 | C | 830  | 1.35E-06 | 1.02E-04 |
| 1 | 197 | L1 vs. M1 | - | Development | Development          | membrane-enclosed lumen                                        | GO:0031974 | C | 830  | 1.35E-06 | 9.49E-05 |
| 1 | 198 | L1 vs. M1 | - | Development | Development          | microtubule                                                    | GO:0005874 | C | 88   | 1.61E-03 | 3.18E-02 |
| 1 | 199 | L1 vs. M1 | - | Development | Development          | microtubule-based movement                                     | GO:0007018 | P | 39   | 2.08E-05 | 1.44E-03 |
| 1 | 200 | L1 vs. M1 | - | Development | Development          | microtubule-based process                                      | GO:0007017 | P | 149  | 7.91E-04 | 2.74E-02 |
| 1 | 201 | L1 vs. M1 | - | Development | Development          | movement of cell or subcellular component                      | GO:0006928 | P | 52   | 4.34E-05 | 2.64E-03 |
| 1 | 202 | L1 vs. M1 | - | Development | Development          | non-membrane-bounded organelle                                 | GO:0043228 | C | 1113 | 1.43E-14 | 4.71E-12 |
| 1 | 203 | L1 vs. M1 | - | Development | Development          | nuclear lumen                                                  | GO:0031981 | C | 726  | 1.81E-06 | 1.11E-04 |
| 1 | 204 | L1 vs. M1 | - | Development | Development          | nuclear replisome                                              | GO:0043601 | C | 16   | 4.37E-05 | 1.96E-03 |
| 1 | 205 | L1 vs. M1 | - | Development | Development          | nucleus organization                                           | GO:0006997 | P | 29   | 6.94E-04 | 2.45E-02 |
| 1 | 206 | L1 vs. M1 | - | Development | Development          | organelle assembly                                             | GO:0070925 | P | 132  | 2.27E-05 | 1.50E-03 |
| 1 | 207 | L1 vs. M1 | - | Development | Development          | organelle fission                                              | GO:0048285 | P | 117  | 1.79E-06 | 2.07E-04 |
| 1 | 208 | L1 vs. M1 | - | Development | Development          | organelle lumen                                                | GO:0043233 | C | 830  | 1.35E-06 | 8.86E-05 |
| 1 | 209 | L1 vs. M1 | - | Development | Development          | organelle organization                                         | GO:0006996 | P | 1043 | 5.26E-04 | 2.05E-02 |
| 1 | 210 | L1 vs. M1 | - | Development | Development          | structural molecule activity                                   | GO:0005198 | F | 308  | 4.85E-10 | 7.05E-07 |
| 1 | 211 | L1 vs. M1 | - | Metabolism  | Catabolism           | protein-containing complex                                     | GO:0032991 | C | 1910 | 1.71E-04 | 5.43E-03 |
| 1 | 212 | L1 vs. M1 | - | Metabolism  | Catabolism           | RNA phosphodiester bond hydrolysis, endonucleolytic            | GO:0090502 | P | 13   | 1.66E-03 | 4.83E-02 |
| 1 | 213 | L1 vs. M1 | - | Metabolism  | Metabolism           | amide biosynthetic process                                     | GO:0043604 | P | 408  | 7.41E-08 | 1.64E-05 |
| 1 | 214 | L1 vs. M1 | - | Metabolism  | Metabolism           | cellular amide metabolic process                               | GO:0043603 | P | 493  | 3.21E-06 | 3.36E-04 |
| 1 | 215 | L1 vs. M1 | - | Metabolism  | Metabolism           | cellular macromolecule biosynthetic process                    | GO:0034645 | P | 819  | 4.18E-08 | 1.10E-05 |
| 1 | 216 | L1 vs. M1 | - | Metabolism  | Metabolism           | cellular nitrogen compound biosynthetic process                | GO:0044271 | P | 813  | 1.45E-03 | 4.37E-02 |
| 1 | 217 | L1 vs. M1 | - | Metabolism  | Metabolism           | cellular nitrogen compound metabolic process                   | GO:0034641 | P | 1813 | 2.97E-06 | 3.17E-04 |
| 1 | 218 | L1 vs. M1 | - | Metabolism  | Metabolism           | cellular protein-containing complex assembly                   | GO:0034622 | P | 306  | 4.25E-05 | 2.61E-03 |
| 1 | 219 | L1 vs. M1 | - | Metabolism  | Metabolism           | DNA metabolic process                                          | GO:0006259 | P | 270  | 1.25E-04 | 6.33E-03 |
| 1 | 220 | L1 vs. M1 | - | Metabolism  | Metabolism           | macromolecule biosynthetic process                             | GO:0009059 | P | 858  | 1.25E-07 | 2.57E-05 |
| 1 | 221 | L1 vs. M1 | - | Metabolism  | Metabolism           | microtubule binding                                            | GO:0008017 | F | 96   | 3.72E-05 | 7.71E-03 |
| 1 | 222 | L1 vs. M1 | - | Metabolism  | Metabolism           | motor activity                                                 | GO:0003774 | F | 49   | 4.07E-05 | 7.89E-03 |
| 1 | 223 | L1 vs. M1 | - | Metabolism  | Metabolism           | peptide metabolic process                                      | GO:0006518 | P | 408  | 9.44E-09 | 3.27E-06 |
| 1 | 224 | L1 vs. M1 | - | Metabolism  | Metabolism           | transferase complex, transferring phosphorus-containing groups | GO:0061695 | C | 136  | 1.74E-03 | 3.37E-02 |
| 1 | 225 | L1 vs. M1 | - | Metabolism  | Metabolism           | tubulin binding                                                | GO:0015631 | F | 103  | 1.74E-04 | 2.81E-02 |
| 1 | 226 | L1 vs. M1 | - | Metabolism  | Photosynthesis       | photosystem II reaction center                                 | GO:0009539 | C | 8    | 3.05E-04 | 8.59E-03 |
| 1 | 227 | L1 vs. M1 | - | Metabolism  | Photosynthesis       | plastid large ribosomal subunit                                | GO:0000311 | C | 12   | 1.24E-03 | 2.60E-02 |
| 1 | 228 | L1 vs. M1 | - | Metabolism  | Photosynthesis       | plastid ribosome                                               | GO:0009547 | C | 22   | 1.06E-05 | 6.17E-04 |
| 1 | 229 | L1 vs. M1 | - | Metabolism  | Transporters         | sulfate assimilation                                           | GO:0000103 | P | 16   | 1.46E-04 | 7.04E-03 |
| 1 | 230 | L1 vs. M1 | - | Regulation  | Protein modification | protein-containing complex assembly                            | GO:0065003 | P | 347  | 9.83E-04 | 3.28E-02 |
| 1 | 231 | L1 vs. M1 | - | Regulation  | Protein modification | protein-containing complex subunit organization                | GO:0043933 | P | 395  | 2.31E-04 | 1.01E-02 |
| 1 | 232 | L1 vs. M1 | - | Regulation  | Transcription        | DNA conformation change                                        | GO:0071103 | P | 86   | 7.46E-05 | 4.14E-03 |
| 1 | 233 | L1 vs. M1 | - | Regulation  | Transcription        | gene expression                                                | GO:0010467 | P | 1013 | 3.65E-08 | 1.01E-05 |
| 1 | 234 | L1 vs. M1 | - | Regulation  | Transcription        | nucleolus                                                      | GO:0005730 | C | 344  | 1.23E-09 | 2.02E-07 |
| 1 | 235 | L1 vs. M1 | - | Regulation  | Transcription        | nucleosome organization                                        | GO:0034728 | P | 36   | 1.11E-03 | 3.58E-02 |
| 1 | 236 | L1 vs. M1 | - | Regulation  | Transcription        | protein-DNA complex                                            | GO:0032993 | C | 41   | 1.55E-03 | 3.12E-02 |
| 1 | 237 | L1 vs. M1 | - | Regulation  | Transcription        | protein-DNA complex assembly                                   | GO:0065004 | P | 49   | 4.86E-04 | 1.92E-02 |
| 1 | 238 | L1 vs. M1 | - | Regulation  | Transcription        | protein-DNA complex subunit organization                       | GO:0071824 | P | 59   | 5.83E-05 | 3.40E-03 |
| 1 | 239 | L1 vs. M1 | - | Regulation  | Transcription        | RNA modification                                               | GO:0009451 | P | 151  | 2.81E-06 | 3.05E-04 |
| 1 | 240 | L1 vs. M1 | - | Regulation  | Translation          | 90S preribosome                                                | GO:0030686 | C | 17   | 1.34E-05 | 7.35E-04 |
| 1 | 241 | L1 vs. M1 | - | Regulation  | Translation          | cleavage involved in rRNA processing                           | GO:0000469 | P | 14   | 8.92E-05 | 4.89E-03 |
| 1 | 242 | L1 vs. M1 | - | Regulation  | Translation          | cytosolic large ribosomal subunit                              | GO:0022625 | C | 107  | 1.98E-09 | 2.44E-07 |
| 1 | 243 | L1 vs. M1 | - | Regulation  | Translation          | cytosolic ribosome                                             | GO:0022626 | C | 241  | 2.51E-07 | 2.06E-05 |
| 1 | 244 | L1 vs. M1 | - | Regulation  | Translation          | cytosolic small ribosomal subunit                              | GO:0022627 | C | 78   | 2.46E-03 | 4.33E-02 |
| 1 | 245 | L1 vs. M1 | - | Regulation  | Translation          | endonucleolytic cleavage involved in rRNA processing           | GO:0000478 | P | 7    | 1.48E-03 | 4.43E-02 |
| 1 | 246 | L1 vs. M1 | - | Regulation  | Translation          | large ribosomal subunit                                        | GO:0015934 | C | 135  | 2.09E-11 | 4.13E-09 |
| 1 | 247 | L1 vs. M1 | - | Regulation  | Translation          | maturation of SSU-rRNA                                         | GO:0030490 | P | 37   | 1.72E-05 | 1.22E-03 |

|   |     |           |   |                        |               |                                                                                          |            |   |      |          |          |
|---|-----|-----------|---|------------------------|---------------|------------------------------------------------------------------------------------------|------------|---|------|----------|----------|
| 1 | 248 | L1 vs. M1 | - | Regulation             | Translation   | maturation of SSU-rRNA from tricistronic rRNA transcript (SSU-rRNA, 5.8S rRNA, LSU-rRNA) | GO:0000462 | P | 24   | 3.38E-04 | 1.38E-02 |
| 1 | 249 | L1 vs. M1 | - | Regulation             | Translation   | ncRNA metabolic process                                                                  | GO:0034660 | P | 281  | 3.33E-05 | 2.12E-03 |
| 1 | 250 | L1 vs. M1 | - | Regulation             | Translation   | ncRNA processing                                                                         | GO:0034470 | P | 235  | 5.03E-06 | 4.35E-04 |
| 1 | 251 | L1 vs. M1 | - | Regulation             | Translation   | organellar ribosome                                                                      | GO:0000313 | C | 47   | 1.22E-04 | 4.16E-03 |
| 1 | 252 | L1 vs. M1 | - | Regulation             | Translation   | peptide biosynthetic process                                                             | GO:0043043 | P | 364  | 1.24E-09 | 4.90E-07 |
| 1 | 253 | L1 vs. M1 | - | Regulation             | Translation   | preribosome                                                                              | GO:0030684 | C | 60   | 1.42E-07 | 1.28E-05 |
| 1 | 254 | L1 vs. M1 | - | Regulation             | Translation   | ribonucleoprotein complex                                                                | GO:1990904 | C | 459  | 6.33E-15 | 6.24E-12 |
| 1 | 255 | L1 vs. M1 | - | Regulation             | Translation   | ribonucleoprotein complex assembly                                                       | GO:0022618 | P | 124  | 3.82E-07 | 6.23E-05 |
| 1 | 256 | L1 vs. M1 | - | Regulation             | Translation   | ribonucleoprotein complex biogenesis                                                     | GO:0022613 | P | 307  | 6.69E-12 | 4.64E-09 |
| 1 | 257 | L1 vs. M1 | - | Regulation             | Translation   | ribonucleoprotein complex subunit organization                                           | GO:0071826 | P | 127  | 4.13E-07 | 6.53E-05 |
| 1 | 258 | L1 vs. M1 | - | Regulation             | Translation   | ribosomal large subunit assembly                                                         | GO:0000027 | P | 36   | 2.21E-05 | 1.48E-03 |
| 1 | 259 | L1 vs. M1 | - | Regulation             | Translation   | ribosomal large subunit biogenesis                                                       | GO:0042273 | P | 79   | 8.13E-07 | 1.10E-04 |
| 1 | 260 | L1 vs. M1 | - | Regulation             | Translation   | ribosomal small subunit assembly                                                         | GO:0000028 | P | 30   | 1.09E-04 | 5.70E-03 |
| 1 | 261 | L1 vs. M1 | - | Regulation             | Translation   | ribosomal small subunit biogenesis                                                       | GO:0042274 | P | 67   | 5.44E-07 | 7.94E-05 |
| 1 | 262 | L1 vs. M1 | - | Regulation             | Translation   | ribosomal subunit                                                                        | GO:0044391 | C | 238  | 1.65E-13 | 4.06E-11 |
| 1 | 263 | L1 vs. M1 | - | Regulation             | Translation   | ribosome                                                                                 | GO:0005840 | C | 303  | 1.48E-09 | 2.09E-07 |
| 1 | 264 | L1 vs. M1 | - | Regulation             | Translation   | ribosome assembly                                                                        | GO:0042255 | P | 71   | 1.48E-08 | 4.84E-06 |
| 1 | 265 | L1 vs. M1 | - | Regulation             | Translation   | ribosome biogenesis                                                                      | GO:0042254 | P | 253  | 6.36E-13 | 7.05E-10 |
| 1 | 266 | L1 vs. M1 | - | Regulation             | Translation   | RNA phosphodiester bond hydrolysis                                                       | GO:0090501 | P | 26   | 6.60E-05 | 3.73E-03 |
| 1 | 267 | L1 vs. M1 | - | Regulation             | Translation   | RNA processing                                                                           | GO:0006396 | P | 495  | 6.44E-04 | 2.36E-02 |
| 1 | 268 | L1 vs. M1 | - | Regulation             | Translation   | rRNA metabolic process                                                                   | GO:0016072 | P | 170  | 1.68E-06 | 2.07E-04 |
| 1 | 269 | L1 vs. M1 | - | Regulation             | Translation   | rRNA processing                                                                          | GO:0006364 | P | 162  | 2.15E-07 | 4.11E-05 |
| 1 | 270 | L1 vs. M1 | - | Regulation             | Translation   | small nucleolar ribonucleoprotein complex                                                | GO:0005732 | C | 17   | 1.49E-03 | 3.06E-02 |
| 1 | 271 | L1 vs. M1 | - | Regulation             | Translation   | small ribosomal subunit                                                                  | GO:0015935 | C | 103  | 3.34E-04 | 8.89E-03 |
| 1 | 272 | L1 vs. M1 | - | Regulation             | Translation   | small-subunit processome                                                                 | GO:0032040 | C | 37   | 4.85E-05 | 1.91E-03 |
| 1 | 273 | L1 vs. M1 | - | Regulation             | Translation   | snoRNA binding                                                                           | GO:0030515 | F | 18   | 3.02E-04 | 3.99E-02 |
| 1 | 274 | L1 vs. M1 | - | Regulation             | Translation   | structural constituent of ribosome                                                       | GO:0003735 | F | 224  | 3.19E-12 | 9.26E-09 |
| 1 | 275 | L1 vs. M1 | - | Regulation             | Translation   | translation                                                                              | GO:0006412 | P | 360  | 2.53E-10 | 1.28E-07 |
| 1 | 276 | L1 vs. M1 | - | Signaling and response | Signaling     | protein kinase complex                                                                   | GO:1902911 | C | 50   | 2.31E-03 | 4.21E-02 |
| 1 | 277 | L1 vs. M1 | - | Signaling and response | Signaling     | serine/threonine protein kinase complex                                                  | GO:1902554 | C | 46   | 8.20E-04 | 2.02E-02 |
| 1 | 278 | L1 vs. M1 | - | Signaling and response | Stress        | cellular response to DNA damage stimulus                                                 | GO:0006974 | P | 221  | 1.01E-03 | 3.30E-02 |
| 2 | 279 | L2 vs. M2 | + | Development            | Cell division | nucleic acid metabolic process                                                           | GO:0090304 | P | 1011 | 1.85E-05 | 1.03E-02 |
| 2 | 280 | L2 vs. M2 | + | Development            | Cell division | nucleobase-containing compound metabolic process                                         | GO:0006139 | P | 1292 | 6.54E-05 | 2.01E-02 |
| 2 | 281 | L2 vs. M2 | + | Development            | Cell division | nucleoside-triphosphatase activity                                                       | GO:0017111 | F | 496  | 1.01E-08 | 2.95E-05 |
| 2 | 282 | L2 vs. M2 | + | Development            | Cell division | preprophase band                                                                         | GO:0009574 | C | 13   | 7.70E-04 | 3.16E-02 |
| 2 | 283 | L2 vs. M2 | + | Development            | Cell division | spindle                                                                                  | GO:0005819 | C | 50   | 5.91E-04 | 2.53E-02 |
| 2 | 284 | L2 vs. M2 | + | Development            | Development   | cellular component organization                                                          | GO:0016043 | P | 1494 | 3.69E-06 | 1.02E-02 |
| 2 | 285 | L2 vs. M2 | + | Development            | Development   | cellular component organization or biogenesis                                            | GO:0071840 | P | 1745 | 4.66E-06 | 6.46E-03 |
| 2 | 286 | L2 vs. M2 | + | Development            | Development   | cytoskeletal protein binding                                                             | GO:0008092 | F | 180  | 2.29E-08 | 1.66E-05 |
| 2 | 287 | L2 vs. M2 | + | Development            | Development   | cytoskeleton                                                                             | GO:0005856 | C | 192  | 4.69E-08 | 7.71E-06 |
| 2 | 288 | L2 vs. M2 | + | Development            | Development   | cytoskeleton organization                                                                | GO:0007010 | P | 189  | 4.29E-05 | 1.49E-02 |
| 2 | 289 | L2 vs. M2 | + | Development            | Development   | cytosol                                                                                  | GO:0005829 | C | 2304 | 2.13E-09 | 6.99E-07 |
| 2 | 290 | L2 vs. M2 | + | Development            | Development   | envelope                                                                                 | GO:0031975 | C | 740  | 1.06E-03 | 4.17E-02 |
| 2 | 291 | L2 vs. M2 | + | Development            | Development   | intracellular non-membrane-bounded organelle                                             | GO:0043232 | C | 1113 | 2.49E-08 | 6.13E-06 |
| 2 | 292 | L2 vs. M2 | + | Development            | Development   | intracellular organelle lumen                                                            | GO:0070013 | C | 830  | 1.43E-04 | 8.29E-03 |
| 2 | 293 | L2 vs. M2 | + | Development            | Development   | membrane-enclosed lumen                                                                  | GO:0031974 | C | 830  | 1.43E-04 | 7.83E-03 |
| 2 | 294 | L2 vs. M2 | + | Development            | Development   | microtubule                                                                              | GO:0005874 | C | 88   | 3.19E-05 | 2.10E-03 |
| 2 | 295 | L2 vs. M2 | + | Development            | Development   | microtubule cytoskeleton                                                                 | GO:0015630 | C | 139  | 7.37E-07 | 7.27E-05 |
| 2 | 296 | L2 vs. M2 | + | Development            | Development   | microtubule-based movement                                                               | GO:0007018 | P | 39   | 1.51E-04 | 2.61E-02 |
| 2 | 297 | L2 vs. M2 | + | Development            | Development   | microtubule-based process                                                                | GO:0007017 | P | 149  | 2.70E-05 | 1.15E-02 |
| 2 | 298 | L2 vs. M2 | + | Development            | Development   | movement of cell or subcellular component                                                | GO:0006928 | P | 52   | 3.06E-04 | 4.47E-02 |
| 2 | 299 | L2 vs. M2 | + | Development            | Development   | non-membrane-bounded organelle                                                           | GO:0043228 | C | 1113 | 2.49E-08 | 4.91E-06 |
| 2 | 300 | L2 vs. M2 | + | Development            | Development   | nuclear lumen                                                                            | GO:0031981 | C | 726  | 1.08E-04 | 6.65E-03 |
| 2 | 301 | L2 vs. M2 | + | Development            | Development   | nucleus                                                                                  | GO:0005634 | C | 5373 | 3.03E-04 | 1.42E-02 |
| 2 | 302 | L2 vs. M2 | + | Development            | Development   | organelle envelope                                                                       | GO:0031967 | C | 740  | 1.06E-03 | 4.01E-02 |
| 2 | 303 | L2 vs. M2 | + | Development            | Development   | organelle lumen                                                                          | GO:0043233 | C | 830  | 1.43E-04 | 7.42E-03 |
| 2 | 304 | L2 vs. M2 | + | Development            | Development   | organelle organization                                                                   | GO:0006996 | P | 1043 | 8.39E-06 | 6.64E-03 |
| 2 | 305 | L2 vs. M2 | + | Development            | Development   | polymeric cytoskeletal fiber                                                             | GO:0099513 | C | 94   | 1.37E-05 | 1.12E-03 |
| 2 | 306 | L2 vs. M2 | + | Metabolism             | Bioenergetics | ATPase activity                                                                          | GO:0016887 | F | 346  | 5.01E-07 | 2.08E-04 |
| 2 | 307 | L2 vs. M2 | + | Metabolism             | Bioenergetics | carbohydrate catabolic process                                                           | GO:0016052 | P | 154  | 9.66E-05 | 2.55E-02 |
| 2 | 308 | L2 vs. M2 | + | Metabolism             | Bioenergetics | carbohydrate metabolic process                                                           | GO:0005975 | P | 593  | 6.45E-06 | 7.15E-03 |
| 2 | 309 | L2 vs. M2 | + | Metabolism             | Bioenergetics | cellular carbohydrate metabolic process                                                  | GO:0044262 | P | 262  | 1.08E-04 | 2.60E-02 |
| 2 | 310 | L2 vs. M2 | + | Metabolism             | Bioenergetics | polysaccharide metabolic process                                                         | GO:0005976 | P | 275  | 2.19E-04 | 3.46E-02 |

|   |     |           |   |             |                |                                                                   |            |   |      |          |          |
|---|-----|-----------|---|-------------|----------------|-------------------------------------------------------------------|------------|---|------|----------|----------|
| 2 | 311 | L2 vs. M2 | + | Metabolism  | Bioenergetics  | primary metabolic process                                         | GO:0044238 | P | 4375 | 4.30E-06 | 7.93E-03 |
| 2 | 312 | L2 vs. M2 | + | Metabolism  | Catabolism     | catabolic process                                                 | GO:0009056 | P | 935  | 8.28E-06 | 7.64E-03 |
| 2 | 313 | L2 vs. M2 | + | Metabolism  | Catabolism     | cellular catabolic process                                        | GO:0044248 | P | 785  | 3.29E-04 | 4.67E-02 |
| 2 | 314 | L2 vs. M2 | + | Metabolism  | Catabolism     | organic substance catabolic process                               | GO:1901575 | P | 861  | 3.54E-05 | 1.31E-02 |
| 2 | 315 | L2 vs. M2 | + | Metabolism  | Catabolism     | protein-containing complex                                        | GO:0032991 | C | 1910 | 1.86E-04 | 9.15E-03 |
| 2 | 316 | L2 vs. M2 | + | Metabolism  | Metabolism     | binding                                                           | GO:0005488 | F | 5829 | 1.27E-04 | 3.36E-02 |
| 2 | 317 | L2 vs. M2 | + | Metabolism  | Metabolism     | cellular aromatic compound metabolic process                      | GO:0006725 | P | 1558 | 2.50E-05 | 1.16E-02 |
| 2 | 318 | L2 vs. M2 | + | Metabolism  | Metabolism     | cellular macromolecule metabolic process                          | GO:0044260 | P | 2636 | 2.77E-04 | 4.15E-02 |
| 2 | 319 | L2 vs. M2 | + | Metabolism  | Metabolism     | cellular nitrogen compound metabolic process                      | GO:0034641 | P | 1813 | 1.51E-04 | 2.69E-02 |
| 2 | 320 | L2 vs. M2 | + | Metabolism  | Metabolism     | heterocycle metabolic process                                     | GO:0046483 | P | 1486 | 1.66E-05 | 1.15E-02 |
| 2 | 321 | L2 vs. M2 | + | Metabolism  | Metabolism     | hydrolase activity                                                | GO:0016787 | F | 1781 | 1.58E-05 | 4.58E-03 |
| 2 | 322 | L2 vs. M2 | + | Metabolism  | Metabolism     | hydrolase activity, acting on acid anhydrides                     | GO:0016817 | F | 535  | 3.00E-08 | 1.75E-05 |
|   |     |           |   |             |                | hydrolase activity, acting on acid anhydrides, in phosphorus-     |            |   |      |          |          |
|   |     |           |   |             |                | containing anhydrides                                             | GO:0016818 | F | 530  | 1.70E-08 | 2.48E-05 |
| 2 | 323 | L2 vs. M2 | + | Metabolism  | Metabolism     | macromolecule metabolic process                                   | GO:0043170 | P | 3269 | 2.30E-06 | 1.28E-02 |
| 2 | 324 | L2 vs. M2 | + | Metabolism  | Metabolism     | metabolic process                                                 | GO:0008152 | P | 5274 | 9.31E-05 | 2.58E-02 |
| 2 | 325 | L2 vs. M2 | + | Metabolism  | Metabolism     | microtubule binding                                               | GO:0008017 | F | 96   | 2.33E-06 | 7.53E-04 |
| 2 | 326 | L2 vs. M2 | + | Metabolism  | Metabolism     | nitrogen compound metabolic process                               | GO:0006807 | P | 3724 | 2.23E-04 | 3.43E-02 |
| 2 | 327 | L2 vs. M2 | + | Metabolism  | Metabolism     | organic cyclic compound metabolic process                         | GO:1901360 | P | 1623 | 6.33E-05 | 2.06E-02 |
| 2 | 328 | L2 vs. M2 | + | Metabolism  | Metabolism     | organic substance metabolic process                               | GO:0071704 | P | 4781 | 1.76E-05 | 1.08E-02 |
| 2 | 329 | L2 vs. M2 | + | Metabolism  | Metabolism     | protein binding                                                   | GO:0005515 | F | 3306 | 4.56E-08 | 2.21E-05 |
| 2 | 330 | L2 vs. M2 | + | Metabolism  | Metabolism     | pyrophosphatase activity                                          | GO:0016462 | F | 527  | 1.96E-08 | 1.90E-05 |
| 2 | 331 | L2 vs. M2 | + | Metabolism  | Metabolism     | supramolecular complex                                            | GO:0099080 | C | 157  | 2.47E-05 | 1.74E-03 |
| 2 | 332 | L2 vs. M2 | + | Metabolism  | Metabolism     | supramolecular fiber                                              | GO:0099512 | C | 94   | 1.37E-05 | 1.04E-03 |
| 2 | 333 | L2 vs. M2 | + | Metabolism  | Metabolism     | supramolecular polymer                                            | GO:0099081 | C | 94   | 1.37E-05 | 1.23E-03 |
| 2 | 334 | L2 vs. M2 | + | Metabolism  | Metabolism     | tubulin binding                                                   | GO:0015631 | F | 103  | 2.12E-06 | 7.70E-04 |
| 2 | 335 | L2 vs. M2 | + | Metabolism  | Metabolism     | chlorophyll metabolic process                                     | GO:0015994 | P | 45   | 3.40E-04 | 4.71E-02 |
| 2 | 336 | L2 vs. M2 | + | Metabolism  | Photosynthesis | chloroplast envelope                                              | GO:0009941 | C | 474  | 3.08E-07 | 3.80E-05 |
| 2 | 337 | L2 vs. M2 | + | Metabolism  | Photosynthesis | chloroplast stroma                                                | GO:0009570 | C | 548  | 2.29E-11 | 2.25E-08 |
| 2 | 338 | L2 vs. M2 | + | Metabolism  | Photosynthesis | plastid                                                           | GO:0009536 | C | 3328 | 1.07E-03 | 3.75E-02 |
| 2 | 339 | L2 vs. M2 | + | Metabolism  | Photosynthesis | plastid envelope                                                  | GO:0009526 | C | 490  | 1.80E-07 | 2.54E-05 |
| 2 | 340 | L2 vs. M2 | + | Metabolism  | Photosynthesis | plastid stroma                                                    | GO:0009532 | C | 557  | 7.76E-11 | 3.83E-08 |
| 2 | 341 | L2 vs. M2 | + | Metabolism  | Transporters   | kinesin complex                                                   | GO:0005871 | C | 19   | 4.02E-04 | 1.80E-02 |
| 2 | 342 | L2 vs. M2 | + | Regulation  | Transcription  | gene expression                                                   | GO:0010467 | P | 1013 | 1.26E-04 | 2.58E-02 |
| 2 | 343 | L2 vs. M2 | + | Regulation  | Transcription  | RNA binding                                                       | GO:0003723 | F | 1050 | 1.69E-04 | 4.10E-02 |
| 2 | 344 | L2 vs. M2 | + | Regulation  | Translation    | mRNA metabolic process                                            | GO:0016071 | P | 266  | 2.11E-04 | 3.45E-02 |
| 2 | 345 | L2 vs. M2 | + | Regulation  | Translation    | RNA splicing                                                      | GO:0008380 | P | 180  | 1.06E-04 | 2.68E-02 |
| 2 | 346 | L2 vs. M2 | + | Regulation  | Translation    | spliceosomal complex                                              | GO:0005681 | C | 100  | 1.06E-03 | 3.87E-02 |
| 2 | 347 | L2 vs. M2 | + | Regulation  | Translation    | spliceosomal complex                                              | GO:0005681 | C | 100  | 1.06E-03 | 3.87E-02 |
| 2 | 348 | L2 vs. M2 | - | Metabolism  | Metabolism     | glucosinolate biosynthetic process                                | GO:0019761 | P | 23   | 1.41E-04 | 2.69E-02 |
| 2 | 349 | L2 vs. M2 | - | Metabolism  | Metabolism     | glucosinolate metabolic process                                   | GO:0019760 | P | 67   | 1.16E-04 | 2.58E-02 |
| 2 | 350 | L2 vs. M2 | - | Metabolism  | Metabolism     | glycosinolate biosynthetic process                                | GO:0019758 | P | 23   | 1.41E-04 | 2.60E-02 |
| 2 | 351 | L2 vs. M2 | - | Metabolism  | Metabolism     | glycosinolate metabolic process                                   | GO:0019757 | P | 67   | 1.16E-04 | 2.48E-02 |
| 2 | 352 | L2 vs. M2 | - | Metabolism  | Metabolism     | glycosyl compound biosynthetic process                            | GO:1901659 | P | 40   | 8.76E-05 | 2.56E-02 |
| 2 | 353 | L2 vs. M2 | - | Metabolism  | Metabolism     | glycosyl compound metabolic process                               | GO:1901657 | P | 115  | 1.91E-04 | 3.20E-02 |
| 2 | 354 | L2 vs. M2 | - | Metabolism  | Metabolism     | S-glycoside biosynthetic process                                  | GO:0016144 | P | 23   | 1.41E-04 | 2.78E-02 |
| 2 | 355 | L2 vs. M2 | - | Metabolism  | Metabolism     | S-glycoside metabolic process                                     | GO:0016143 | P | 67   | 1.16E-04 | 2.69E-02 |
| 2 | 356 | L2 vs. M2 | - | Metabolism  | Metabolism     | sulfur compound metabolic process                                 | GO:0006790 | P | 246  | 2.47E-05 | 1.25E-02 |
| 2 | 357 | L2 vs. M2 | - | Metabolism  | Transporters   | sulfate assimilation                                              | GO:0000103 | P | 16   | 3.05E-05 | 1.21E-02 |
| 3 | 358 | L3 vs. M3 | + | Regulation  | Translation    | ribosomal subunit                                                 | GO:0044391 | C | 238  | 4.18E-05 | 4.12E-02 |
| 4 | 359 | L4 vs. M4 | + | Development | Cell division  | syncytium formation                                               | GO:0006949 | P | 9    | 4.31E-04 | 4.16E-02 |
| 4 | 360 | L4 vs. M4 | + | Development | Development    | actin cytoskeleton organization                                   | GO:0030036 | P | 52   | 3.73E-04 | 3.81E-02 |
| 4 | 361 | L4 vs. M4 | + | Development | Development    | anatomical structure formation involved in morphogenesis          | GO:0048646 | P | 100  | 1.81E-04 | 2.15E-02 |
| 4 | 362 | L4 vs. M4 | + | Development | Development    | anchored component of membrane                                    | GO:0031225 | C | 137  | 7.63E-05 | 1.74E-02 |
| 4 | 363 | L4 vs. M4 | + | Development | Development    | cellular component assembly involved in morphogenesis             | GO:0010927 | P | 31   | 3.69E-04 | 3.85E-02 |
| 4 | 364 | L4 vs. M4 | + | Development | Development    | cellular component morphogenesis                                  | GO:0032989 | P | 31   | 3.69E-04 | 3.93E-02 |
| 4 | 365 | L4 vs. M4 | + | Development | Development    | external encapsulating structure organization                     | GO:0045229 | P | 176  | 1.09E-04 | 1.40E-02 |
| 4 | 366 | L4 vs. M4 | + | Development | Development    | structural constituent of cell wall                               | GO:0005199 | F | 20   | 1.43E-05 | 2.87E-03 |
| 4 | 367 | L4 vs. M4 | + | Development | Development    | structural molecule activity                                      | GO:0005198 | F | 245  | 4.96E-06 | 1.08E-03 |
|   |     |           |   |             |                |                                                                   |            |   |      |          |          |
| 4 | 368 | L4 vs. M4 | + | Metabolism  | Bioenergetics  | oxidoreductase activity, oxidizing metal ions, oxygen as acceptor | GO:0016724 | F | 6    | 9.79E-05 | 1.50E-02 |
| 4 | 369 | L4 vs. M4 | + | Metabolism  | Metabolism     | ferroxidase activity                                              | GO:0004322 | F | 6    | 9.79E-05 | 1.60E-02 |
| 4 | 370 | L4 vs. M4 | + | Metabolism  | Metabolism     | galactosyltransferase activity                                    | GO:0008378 | F | 22   | 3.30E-04 | 3.59E-02 |
| 4 | 371 | L4 vs. M4 | + | Metabolism  | Metabolism     | sporopollenin biosynthetic process                                | GO:0080110 | P | 5    | 2.62E-04 | 3.04E-02 |
| 4 | 372 | L4 vs. M4 | + | Metabolism  | Photosynthesis | chloroplast thylakoid                                             | GO:0009534 | C | 256  | 4.06E-05 | 1.24E-02 |

|   |     |           |   |                        |                |                                                               |            |   |      |          |          |
|---|-----|-----------|---|------------------------|----------------|---------------------------------------------------------------|------------|---|------|----------|----------|
| 4 | 373 | L4 vs. M4 | + | Metabolism             | Photosynthesis | chloroplast thylakoid membrane                                | GO:0009535 | C | 207  | 2.15E-04 | 2.18E-02 |
| 4 | 374 | L4 vs. M4 | + | Metabolism             | Photosynthesis | photosynthetic membrane                                       | GO:0034357 | C | 225  | 1.78E-04 | 2.33E-02 |
| 4 | 375 | L4 vs. M4 | + | Metabolism             | Photosynthesis | plastid thylakoid                                             | GO:0031976 | C | 258  | 2.96E-05 | 1.35E-02 |
| 4 | 376 | L4 vs. M4 | + | Metabolism             | Photosynthesis | plastid thylakoid membrane                                    | GO:0055035 | C | 210  | 1.13E-04 | 1.73E-02 |
| 4 | 377 | L4 vs. M4 | + | Metabolism             | Photosynthesis | thylakoid                                                     | GO:0009579 | C | 306  | 2.49E-04 | 2.28E-02 |
| 4 | 378 | L4 vs. M4 | + | Metabolism             | Photosynthesis | thylakoid membrane                                            | GO:0042651 | C | 221  | 2.01E-04 | 2.30E-02 |
| 4 | 379 | L4 vs. M4 | + | Metabolism             | Transporters   | Golgi vesicle transport                                       | GO:0048193 | P | 77   | 2.61E-05 | 6.35E-03 |
| 4 | 380 | L4 vs. M4 | - | Development            | Cell division  | nucleobase-containing compound metabolic process              | GO:0006139 | P | 939  | 5.58E-06 | 1.59E-03 |
| 4 | 381 | L4 vs. M4 | - | Development            | Cell division  | nucleoside phosphate binding                                  | GO:1901265 | F | 475  | 3.49E-07 | 1.30E-04 |
| 4 | 382 | L4 vs. M4 | - | Development            | Cell division  | nucleoside-triphosphatase activity                            | GO:0017111 | F | 340  | 3.16E-08 | 2.75E-05 |
| 4 | 383 | L4 vs. M4 | - | Development            | Cell division  | nucleotide binding                                            | GO:0000166 | F | 475  | 3.49E-07 | 1.52E-04 |
| 4 | 384 | L4 vs. M4 | - | Development            | Development    | nucleic acid phosphodiester bond hydrolysis                   | GO:0090305 | P | 39   | 4.28E-04 | 4.21E-02 |
| 4 | 385 | L4 vs. M4 | - | Metabolism             | Bioenergetics  | ATPase activity                                               | GO:0016887 | F | 243  | 1.03E-08 | 1.35E-05 |
| 4 | 386 | L4 vs. M4 | - | Metabolism             | Bioenergetics  | carbohydrate derivative binding                               | GO:0097367 | F | 363  | 8.95E-05 | 1.56E-02 |
| 4 | 387 | L4 vs. M4 | - | Metabolism             | Bioenergetics  | primary metabolic process                                     | GO:0044238 | P | 3260 | 8.07E-05 | 1.15E-02 |
| 4 | 388 | L4 vs. M4 | - | Metabolism             | Bioenergetics  | starch biosynthetic process                                   | GO:0019252 | P | 22   | 5.17E-04 | 4.48E-02 |
| 4 | 389 | L4 vs. M4 | - | Metabolism             | Catabolism     | monocarboxylic acid catabolic process                         | GO:0072329 | P | 35   | 7.69E-05 | 1.16E-02 |
| 4 | 390 | L4 vs. M4 | - | Metabolism             | Metabolism     | anion binding                                                 | GO:0043168 | F | 587  | 3.14E-06 | 7.45E-04 |
| 4 | 391 | L4 vs. M4 | - | Metabolism             | Metabolism     | ATP binding                                                   | GO:0005524 | F | 211  | 3.32E-04 | 3.47E-02 |
| 4 | 392 | L4 vs. M4 | - | Metabolism             | Metabolism     | carboxylic acid metabolic process                             | GO:0019752 | P | 506  | 1.04E-06 | 6.64E-04 |
| 4 | 393 | L4 vs. M4 | - | Metabolism             | Metabolism     | catalytic activity                                            | GO:0003824 | F | 3746 | 2.45E-06 | 6.40E-04 |
| 4 | 394 | L4 vs. M4 | - | Metabolism             | Metabolism     | cellular amino acid metabolic process                         | GO:0006520 | P | 215  | 4.95E-05 | 9.37E-03 |
| 4 | 395 | L4 vs. M4 | - | Metabolism             | Metabolism     | cellular aromatic compound metabolic process                  | GO:0006725 | P | 1153 | 8.18E-06 | 2.09E-03 |
| 4 | 396 | L4 vs. M4 | - | Metabolism             | Metabolism     | cellular metabolic process                                    | GO:0044237 | P | 3499 | 5.14E-04 | 4.53E-02 |
| 4 | 397 | L4 vs. M4 | - | Metabolism             | Metabolism     | cellular nitrogen compound metabolic process                  | GO:0034641 | P | 1340 | 4.99E-04 | 4.55E-02 |
| 4 | 398 | L4 vs. M4 | - | Metabolism             | Metabolism     | glucosyltransferase activity                                  | GO:0046527 | F | 98   | 1.01E-04 | 1.47E-02 |
| 4 | 399 | L4 vs. M4 | - | Metabolism             | Metabolism     | heterocycle metabolic process                                 | GO:0046483 | P | 1083 | 2.44E-06 | 1.04E-03 |
| 4 | 400 | L4 vs. M4 | - | Metabolism             | Metabolism     | hydrolase activity, acting on acid anhydrides                 | GO:0016817 | F | 365  | 4.81E-07 | 1.57E-04 |
|   |     |           |   |                        |                | hydrolase activity, acting on acid anhydrides, in phosphorus- |            |   |      |          |          |
|   |     |           |   |                        |                | containing anhydrides                                         | GO:0016818 | F | 361  | 3.47E-07 | 2.26E-04 |
| 4 | 401 | L4 vs. M4 | - | Metabolism             | Metabolism     | ion binding                                                   | GO:0043167 | F | 1284 | 4.82E-04 | 4.66E-02 |
| 4 | 402 | L4 vs. M4 | - | Metabolism             | Metabolism     | lipid modification                                            | GO:0030258 | P | 51   | 3.55E-04 | 3.95E-02 |
| 4 | 403 | L4 vs. M4 | - | Metabolism             | Metabolism     | metabolic process                                             | GO:0008152 | P | 3955 | 3.43E-04 | 3.90E-02 |
| 4 | 404 | L4 vs. M4 | - | Metabolism             | Metabolism     | monocarboxylic acid metabolic process                         | GO:0032787 | P | 257  | 5.40E-05 | 9.86E-03 |
| 4 | 405 | L4 vs. M4 | - | Metabolism             | Metabolism     | nitrogen compound metabolic process                           | GO:0006807 | P | 2721 | 3.00E-05 | 6.97E-03 |
| 4 | 406 | L4 vs. M4 | - | Metabolism             | Metabolism     | organic acid metabolic process                                | GO:0006082 | P | 555  | 8.42E-07 | 8.61E-04 |
| 4 | 407 | L4 vs. M4 | - | Metabolism             | Metabolism     | organic cyclic compound metabolic process                     | GO:1901360 | P | 1194 | 4.42E-06 | 1.51E-03 |
| 4 | 408 | L4 vs. M4 | - | Metabolism             | Metabolism     | organic substance metabolic process                           | GO:0071704 | P | 3566 | 6.75E-05 | 1.11E-02 |
| 4 | 409 | L4 vs. M4 | - | Metabolism             | Metabolism     | oxoacid metabolic process                                     | GO:0043436 | P | 554  | 1.09E-06 | 6.18E-04 |
| 4 | 410 | L4 vs. M4 | - | Metabolism             | Metabolism     | phosphorus metabolic process                                  | GO:0006793 | P | 857  | 4.63E-04 | 4.38E-02 |
| 4 | 411 | L4 vs. M4 | - | Metabolism             | Metabolism     | purine nucleotide binding                                     | GO:0017076 | F | 333  | 2.79E-04 | 3.16E-02 |
| 4 | 412 | L4 vs. M4 | - | Metabolism             | Metabolism     | purine ribonucleoside triphosphate binding                    | GO:0035639 | F | 275  | 1.06E-04 | 1.46E-02 |
| 4 | 413 | L4 vs. M4 | - | Metabolism             | Metabolism     | purine ribonucleotide binding                                 | GO:0032555 | F | 326  | 2.12E-04 | 2.51E-02 |
| 4 | 414 | L4 vs. M4 | - | Metabolism             | Metabolism     | pyrophosphatase activity                                      | GO:0016462 | F | 361  | 3.47E-07 | 1.81E-04 |
| 4 | 415 | L4 vs. M4 | - | Metabolism             | Metabolism     | small molecule binding                                        | GO:0036094 | F | 579  | 9.71E-09 | 2.53E-05 |
| 4 | 416 | L4 vs. M4 | - | Metabolism             | Metabolism     | small molecule metabolic process                              | GO:0044281 | P | 806  | 3.48E-06 | 1.27E-03 |
| 4 | 417 | L4 vs. M4 | - | Metabolism             | Metabolism     | transferase activity                                          | GO:0016740 | F | 1478 | 5.01E-07 | 1.45E-04 |
| 4 | 418 | L4 vs. M4 | - | Metabolism             | Metabolism     | UDP-glucosyltransferase activity                              | GO:0035251 | F | 75   | 2.28E-05 | 4.24E-03 |
| 4 | 419 | L4 vs. M4 | - | Metabolism             | Metabolism     | vitamin binding                                               | GO:0019842 | F | 70   | 4.69E-04 | 4.71E-02 |
| 4 | 420 | L4 vs. M4 | - | Metabolism             | Metabolism     |                                                               |            |   |      |          |          |
|   |     |           |   |                        |                |                                                               |            |   |      |          |          |
| 4 | 421 | L4 vs. M4 | - | Metabolism             | Transporters   | ATPase-coupled xenobiotic transmembrane transporter activity  | GO:0008559 | F | 10   | 5.29E-04 | 4.93E-02 |
| 4 | 422 | L4 vs. M4 | - | Metabolism             | Transporters   | transmembrane transport                                       | GO:0055085 | P | 408  | 7.55E-05 | 1.17E-02 |
| 4 | 423 | L4 vs. M4 | - | Metabolism             | Transporters   | zinc ion transmembrane transport                              | GO:0071577 | P | 12   | 3.82E-04 | 3.84E-02 |
| 4 | 424 | L4 vs. M4 | - | Regulation             | Translation    | 90S preribosome                                               | GO:0030686 | C | 12   | 1.08E-04 | 1.97E-02 |
| 4 | 425 | L4 vs. M4 | - | Regulation             | Translation    | ncRNA metabolic process                                       | GO:0034660 | P | 221  | 7.86E-05 | 1.15E-02 |
| 4 | 426 | L4 vs. M4 | - | Regulation             | Translation    | ncRNA processing                                              | GO:0034470 | P | 185  | 4.93E-04 | 4.58E-02 |
| 4 | 427 | L4 vs. M4 | - | Regulation             | Translation    | preribosome                                                   | GO:0030684 | C | 47   | 1.28E-06 | 1.17E-03 |
| 4 | 428 | L4 vs. M4 | - | Regulation             | Translation    | ribonucleotide binding                                        | GO:0032553 | F | 346  | 1.19E-04 | 1.56E-02 |
| 4 | 429 | L4 vs. M4 | - | Regulation             | Translation    | small-subunit processome                                      | GO:0032040 | C | 26   | 4.05E-04 | 3.36E-02 |
| 4 | 430 | L4 vs. M4 | - | Regulation             | Translation    | snoRNA binding                                                | GO:0030515 | F | 16   | 1.93E-04 | 2.40E-02 |
| 4 | 431 | L4 vs. M4 | - | Regulation             | Translation    | tRNA metabolic process                                        | GO:0006399 | P | 81   | 1.75E-04 | 2.13E-02 |
| 4 | 432 | L4 vs. M4 | - | Signaling and response | Signaling      | auxin polar transport                                         | GO:0009926 | P | 35   | 5.54E-04 | 4.72E-02 |
| 4 | 433 | L4 vs. M4 | - | Signaling and response | Signaling      | cellular response to chemical stimulus                        | GO:0070887 | P | 486  | 1.17E-04 | 1.47E-02 |
| 4 | 434 | L4 vs. M4 | - | Signaling and response | Signaling      | cellular response to oxygen levels                            | GO:0071453 | P | 105  | 6.70E-05 | 1.14E-02 |



|   |     |           |   |                        |               |                                                        |            |   |      |          |          |
|---|-----|-----------|---|------------------------|---------------|--------------------------------------------------------|------------|---|------|----------|----------|
| 4 | 435 | L4 vs. M4 | - | Signaling and response | Signaling     | cellular response to stimulus                          | GO:0051716 | P | 1048 | 8.46E-07 | 7.21E-04 |
| 4 | 436 | L4 vs. M4 | - | Signaling and response | Signaling     | protein autophosphorylation                            | GO:0046777 | P | 87   | 5.34E-06 | 1.61E-03 |
| 4 | 437 | L4 vs. M4 | - | Signaling and response | Signaling     | response to cadmium ion                                | GO:0046686 | P | 183  | 3.99E-05 | 8.51E-03 |
| 4 | 438 | L4 vs. M4 | - | Signaling and response | Signaling     | response to chemical                                   | GO:0042221 | P | 1279 | 2.19E-09 | 1.12E-05 |
| 4 | 439 | L4 vs. M4 | - | Signaling and response | Signaling     | response to chitin                                     | GO:0010200 | P | 58   | 3.26E-06 | 1.28E-03 |
| 4 | 440 | L4 vs. M4 | - | Signaling and response | Signaling     | response to inorganic substance                        | GO:0010035 | P | 501  | 3.26E-07 | 4.17E-04 |
| 4 | 441 | L4 vs. M4 | - | Signaling and response | Signaling     | response to metal ion                                  | GO:0010038 | P | 247  | 5.01E-04 | 4.50E-02 |
| 4 | 442 | L4 vs. M4 | - | Signaling and response | Signaling     | response to nitrate                                    | GO:0010167 | P | 11   | 3.64E-04 | 3.96E-02 |
| 4 | 443 | L4 vs. M4 | - | Signaling and response | Signaling     | response to nitrogen compound                          | GO:1901698 | P | 138  | 8.88E-05 | 1.23E-02 |
| 4 | 444 | L4 vs. M4 | - | Signaling and response | Signaling     | response to organic cyclic compound                    | GO:0014070 | P | 140  | 3.69E-05 | 8.19E-03 |
| 4 | 445 | L4 vs. M4 | - | Signaling and response | Signaling     | response to organic substance                          | GO:0010033 | P | 779  | 2.23E-06 | 1.04E-03 |
| 4 | 446 | L4 vs. M4 | - | Signaling and response | Signaling     | response to organonitrogen compound                    | GO:0010243 | P | 113  | 7.00E-05 | 1.12E-02 |
| 4 | 447 | L4 vs. M4 | - | Signaling and response | Signaling     | response to oxygen levels                              | GO:0070482 | P | 123  | 1.07E-04 | 1.40E-02 |
| 4 | 448 | L4 vs. M4 | - | Signaling and response | Signaling     | response to oxygen-containing compound                 | GO:1901700 | P | 737  | 1.63E-07 | 4.17E-04 |
| 4 | 449 | L4 vs. M4 | - | Signaling and response | Signaling     | response to salicylic acid                             | GO:0009751 | P | 64   | 7.87E-06 | 2.12E-03 |
| 4 | 450 | L4 vs. M4 | - | Signaling and response | Signaling     | response to stimulus                                   | GO:0050896 | P | 2496 | 8.73E-07 | 6.38E-04 |
| 4 | 451 | L4 vs. M4 | - | Signaling and response | Stress        | cellular response to decreased oxygen levels           | GO:0036294 | P | 104  | 4.14E-05 | 8.14E-03 |
| 4 | 452 | L4 vs. M4 | - | Signaling and response | Stress        | cellular response to hypoxia                           | GO:0071456 | P | 104  | 4.14E-05 | 8.47E-03 |
| 4 | 453 | L4 vs. M4 | - | Signaling and response | Stress        | cellular response to stress                            | GO:0033554 | P | 498  | 4.60E-06 | 1.47E-03 |
| 4 | 454 | L4 vs. M4 | - | Signaling and response | Stress        | response to decreased oxygen levels                    | GO:0036293 | P | 121  | 6.66E-05 | 1.17E-02 |
| 4 | 455 | L4 vs. M4 | - | Signaling and response | Stress        | response to hypoxia                                    | GO:0001666 | P | 119  | 9.93E-05 | 1.34E-02 |
| 4 | 456 | L4 vs. M4 | - | Signaling and response | Stress        | response to stress                                     | GO:0006950 | P | 1454 | 1.68E-07 | 2.87E-04 |
| 4 | 457 | L4 vs. M4 | - | Signaling and response | Stress        | response to wounding                                   | GO:0009611 | P | 121  | 1.84E-06 | 9.42E-04 |
| 5 | 458 | F2 vs. L2 | + | Development            | Cell division | nucleobase-containing small molecule metabolic process | GO:0055086 | P | 246  | 4.15E-04 | 5.44E-03 |
| 5 | 459 | F2 vs. L2 | + | Development            | Cell division | nucleotide-sugar biosynthetic process                  | GO:0009226 | P | 29   | 6.10E-05 | 1.13E-03 |
| 5 | 460 | F2 vs. L2 | + | Development            | Cell division | nucleotide-sugar metabolic process                     | GO:0009225 | P | 33   | 9.62E-05 | 1.69E-03 |
| 5 | 461 | F2 vs. L2 | + | Development            | Cell division | pollen germination                                     | GO:0009846 | P | 37   | 3.22E-04 | 4.53E-03 |
| 5 | 462 | F2 vs. L2 | + | Development            | Cell division | pollen tube development                                | GO:0048868 | P | 97   | 3.35E-09 | 2.08E-07 |
| 5 | 463 | F2 vs. L2 | + | Development            | Cell division | pollen tube growth                                     | GO:0009860 | P | 74   | 1.09E-08 | 5.80E-07 |
| 5 | 464 | F2 vs. L2 | + | Development            | Cell division | pollination                                            | GO:0009856 | P | 148  | 1.88E-07 | 7.97E-06 |
| 5 | 465 | F2 vs. L2 | + | Development            | Cell division | syncytium formation                                    | GO:0006949 | P | 10   | 3.88E-05 | 7.66E-04 |
| 5 | 466 | F2 vs. L2 | + | Development            | Development   | actin cytoskeleton                                     | GO:0015629 | C | 36   | 1.26E-03 | 8.98E-03 |
| 5 | 467 | F2 vs. L2 | + | Development            | Development   | actin filament                                         | GO:0005884 | C | 8    | 7.84E-04 | 5.82E-03 |
| 5 | 468 | F2 vs. L2 | + | Development            | Development   | apical part of cell                                    | GO:0045177 | C | 15   | 1.43E-03 | 1.01E-02 |
| 5 | 469 | F2 vs. L2 | + | Development            | Development   | apical plasma membrane                                 | GO:0016324 | C | 13   | 3.19E-04 | 2.61E-03 |
| 5 | 470 | F2 vs. L2 | + | Development            | Development   | apoplast                                               | GO:0048046 | C | 166  | 0.00E+00 | 0.00E+00 |
| 5 | 471 | F2 vs. L2 | + | Development            | Development   | bounding membrane of organelle                         | GO:0098588 | C | 577  | 4.26E-04 | 3.34E-03 |
| 5 | 472 | F2 vs. L2 | + | Development            | Development   | cell development                                       | GO:0048468 | P | 173  | 3.22E-04 | 4.53E-03 |
| 5 | 473 | F2 vs. L2 | + | Development            | Development   | cell growth                                            | GO:0016049 | P | 230  | 1.88E-05 | 4.31E-04 |
| 5 | 474 | F2 vs. L2 | + | Development            | Development   | cell morphogenesis                                     | GO:0000902 | P | 215  | 3.02E-03 | 2.86E-02 |
| 5 | 475 | F2 vs. L2 | + | Development            | Development   | cell morphogenesis involved in differentiation         | GO:0000904 | P | 127  | 4.47E-04 | 5.80E-03 |
| 5 | 476 | F2 vs. L2 | + | Development            | Development   | cell periphery                                         | GO:0071944 | C | 2265 | 1.14E-07 | 1.90E-06 |
| 5 | 477 | F2 vs. L2 | + | Development            | Development   | cell pole                                              | GO:0060187 | C | 11   | 2.72E-03 | 1.64E-02 |
| 5 | 478 | F2 vs. L2 | + | Development            | Development   | cell projection                                        | GO:0042995 | C | 63   | 1.33E-08 | 2.62E-07 |
| 5 | 479 | F2 vs. L2 | + | Development            | Development   | cell tip                                               | GO:0051286 | C | 11   | 2.72E-03 | 1.63E-02 |
| 5 | 480 | F2 vs. L2 | + | Development            | Development   | cell tip growth                                        | GO:0009932 | P | 85   | 2.85E-08 | 1.43E-06 |
| 5 | 481 | F2 vs. L2 | + | Development            | Development   | cell wall                                              | GO:0005618 | C | 347  | 1.71E-03 | 1.16E-02 |
| 5 | 482 | F2 vs. L2 | + | Development            | Development   | cell wall biogenesis                                   | GO:0042546 | P | 128  | 3.93E-04 | 5.23E-03 |
| 5 | 483 | F2 vs. L2 | + | Development            | Development   | cell wall modification                                 | GO:0042545 | P | 97   | 2.45E-05 | 5.31E-04 |
| 5 | 484 | F2 vs. L2 | + | Development            | Development   | cell wall organization                                 | GO:0071555 | P | 152  | 4.30E-08 | 2.05E-06 |
| 5 | 485 | F2 vs. L2 | + | Development            | Development   | cell wall organization or biogenesis                   | GO:0071554 | P | 285  | 2.36E-09 | 1.54E-07 |
| 5 | 486 | F2 vs. L2 | + | Development            | Development   | cell wall pectin metabolic process                     | GO:0052546 | P | 15   | 2.83E-03 | 2.77E-02 |
| 5 | 487 | F2 vs. L2 | + | Development            | Development   | cytosol                                                | GO:0005829 | C | 2040 | 6.39E-03 | 3.30E-02 |
| 5 | 488 | F2 vs. L2 | + | Development            | Development   | developmental cell growth                              | GO:0048588 | P | 108  | 5.86E-09 | 3.49E-07 |
| 5 | 489 | F2 vs. L2 | + | Development            | Development   | developmental growth                                   | GO:0048589 | P | 228  | 2.95E-06 | 8.59E-05 |
| 5 | 490 | F2 vs. L2 | + | Development            | Development   | developmental growth involved in morphogenesis         | GO:0060560 | P | 195  | 1.24E-06 | 4.01E-05 |
| 5 | 491 | F2 vs. L2 | + | Development            | Development   | endomembrane system                                    | GO:0012505 | C | 1266 | 4.04E-06 | 5.41E-05 |
| 5 | 492 | F2 vs. L2 | + | Development            | Development   | envelope                                               | GO:0031975 | C | 655  | 4.31E-08 | 8.16E-07 |
| 5 | 493 | F2 vs. L2 | + | Development            | Development   | external encapsulating structure                       | GO:0030312 | C | 349  | 9.89E-04 | 7.12E-03 |
| 5 | 494 | F2 vs. L2 | + | Development            | Development   | external encapsulating structure organization          | GO:0045229 | P | 178  | 2.69E-08 | 1.36E-06 |
| 5 | 495 | F2 vs. L2 | + | Development            | Development   | extracellular region                                   | GO:0005576 | C | 1230 | 1.11E-16 | 5.36E-15 |
| 5 | 496 | F2 vs. L2 | + | Development            | Development   | Golgi apparatus subcompartment                         | GO:0098791 | C | 268  | 9.20E-06 | 1.17E-04 |
| 5 | 497 | F2 vs. L2 | + | Development            | Development   | Golgi trans cisterna                                   | GO:0000138 | C | 55   | 1.54E-04 | 1.35E-03 |
| 5 | 498 | F2 vs. L2 | + | Development            | Development   | growing cell tip                                       | GO:0035838 | C | 9    | 4.13E-03 | 2.30E-02 |



|   |     |           |   |             |               |                                                                                  |            |   |      |          |          |
|---|-----|-----------|---|-------------|---------------|----------------------------------------------------------------------------------|------------|---|------|----------|----------|
| 5 | 499 | F2 vs. L2 | + | Development | Development   | growth                                                                           | GO:0040007 | P | 266  | 2.11E-05 | 4.73E-04 |
| 5 | 500 | F2 vs. L2 | + | Development | Development   | integral component of plasma membrane                                            | GO:0005887 | C | 67   | 1.93E-03 | 1.28E-02 |
| 5 | 501 | F2 vs. L2 | + | Development | Development   | intracellular vesicle                                                            | GO:0097708 | C | 411  | 8.82E-05 | 8.51E-04 |
| 5 | 502 | F2 vs. L2 | + | Development | Development   | membrane                                                                         | GO:0016020 | C | 3042 | 8.95E-13 | 2.98E-11 |
| 5 | 503 | F2 vs. L2 | + | Development | Development   | membrane protein complex                                                         | GO:0098796 | C | 352  | 8.75E-03 | 4.24E-02 |
| 5 | 504 | F2 vs. L2 | + | Development | Development   | microbody                                                                        | GO:0042579 | C | 182  | 7.53E-05 | 7.65E-04 |
| 5 | 505 | F2 vs. L2 | + | Development | Development   | multi-multicellular organism process                                             | GO:0044706 | P | 148  | 1.88E-07 | 8.03E-06 |
| 5 | 506 | F2 vs. L2 | + | Development | Development   | organelle envelope                                                               | GO:0031967 | C | 655  | 4.31E-08 | 8.00E-07 |
| 5 | 507 | F2 vs. L2 | + | Development | Development   | organelle membrane                                                               | GO:0031090 | C | 880  | 5.64E-04 | 4.32E-03 |
| 5 | 508 | F2 vs. L2 | + | Development | Development   | organelle subcompartment                                                         | GO:0031984 | C | 701  | 1.27E-14 | 4.52E-13 |
| 5 | 509 | F2 vs. L2 | + | Development | Development   | plant-type cell wall biogenesis                                                  | GO:0009832 | P | 81   | 4.40E-04 | 5.73E-03 |
| 5 | 510 | F2 vs. L2 | + | Development | Development   | plant-type cell wall loosening                                                   | GO:0009828 | P | 23   | 6.12E-04 | 7.69E-03 |
| 5 | 511 | F2 vs. L2 | + | Development | Development   | plant-type cell wall modification                                                | GO:0009827 | P | 41   | 2.51E-04 | 3.74E-03 |
| 5 | 512 | F2 vs. L2 | + | Development | Development   | plant-type cell wall organization                                                | GO:0009664 | P | 87   | 8.36E-06 | 2.09E-04 |
| 5 | 513 | F2 vs. L2 | + | Development | Development   | plant-type cell wall organization or biogenesis                                  | GO:0071669 | P | 145  | 1.56E-07 | 6.78E-06 |
| 5 | 514 | F2 vs. L2 | + | Development | Development   | plant-type primary cell wall biogenesis                                          | GO:0009833 | P | 19   | 2.28E-05 | 5.03E-04 |
| 5 | 515 | F2 vs. L2 | + | Development | Development   | plant-type vacuole                                                               | GO:0000325 | C | 100  | 6.60E-04 | 4.94E-03 |
| 5 | 516 | F2 vs. L2 | + | Development | Development   | plant-type vacuole membrane                                                      | GO:0009705 | C | 66   | 3.91E-03 | 2.20E-02 |
| 5 | 517 | F2 vs. L2 | + | Development | Development   | plasma membrane                                                                  | GO:0005886 | C | 1987 | 2.37E-06 | 3.31E-05 |
| 5 | 518 | F2 vs. L2 | + | Development | Development   | plasma membrane bounded cell projection                                          | GO:0120025 | C | 56   | 2.08E-11 | 6.29E-10 |
| 5 | 519 | F2 vs. L2 | + | Development | Development   | pollen tube                                                                      | GO:0090406 | C | 48   | 4.91E-11 | 1.39E-09 |
| 5 | 520 | F2 vs. L2 | + | Development | Development   | pollen tube tip                                                                  | GO:0090404 | C | 9    | 4.13E-03 | 2.31E-02 |
| 5 | 521 | F2 vs. L2 | + | Development | Development   | stromule                                                                         | GO:0010319 | C | 28   | 1.62E-09 | 4.23E-08 |
| 5 | 522 | F2 vs. L2 | + | Development | Development   | unidimensional cell growth                                                       | GO:0009826 | P | 167  | 9.35E-06 | 2.33E-04 |
| 5 | 523 | F2 vs. L2 | + | Development | Development   | vacuolar membrane                                                                | GO:0005774 | C | 372  | 7.34E-06 | 9.58E-05 |
| 5 | 524 | F2 vs. L2 | + | Development | Development   | vacuole                                                                          | GO:0005773 | C | 669  | 8.51E-13 | 2.93E-11 |
| 5 | 525 | F2 vs. L2 | + | Metabolism  | Bioenergetics | (1->3)-beta-D-glucan binding (NAD+) activity                                     | GO:0004029 | F | 9    | 9.97E-04 | 2.38E-02 |
| 5 | 526 | F2 vs. L2 | + | Metabolism  | Bioenergetics | aerobic respiration                                                              | GO:0009060 | P | 54   | 7.15E-06 | 1.81E-04 |
| 5 | 527 | F2 vs. L2 | + | Metabolism  | Bioenergetics | alcohol dehydrogenase (NADP+) activity                                           | GO:0008106 | F | 7    | 6.41E-04 | 1.78E-02 |
| 5 | 528 | F2 vs. L2 | + | Metabolism  | Bioenergetics | aldehyde dehydrogenase [NAD(P)+] activity                                        | GO:0004030 | F | 9    | 9.97E-04 | 2.40E-02 |
| 5 | 529 | F2 vs. L2 | + | Metabolism  | Bioenergetics | aldo-keto reductase (NADP) activity                                              | GO:0004033 | F | 8    | 9.87E-04 | 2.40E-02 |
| 5 | 530 | F2 vs. L2 | + | Metabolism  | Bioenergetics | ATP metabolic process                                                            | GO:0046034 | P | 90   | 2.49E-04 | 3.71E-03 |
| 5 | 531 | F2 vs. L2 | + | Metabolism  | Bioenergetics | ATPase activity, coupled to transmembrane movement of ions, rotational mechanism | GO:0044769 | F | 19   | 3.26E-04 | 9.84E-03 |
| 5 | 532 | F2 vs. L2 | + | Metabolism  | Bioenergetics | carbohydrate biosynthetic process                                                | GO:0016051 | P | 177  | 9.63E-11 | 8.58E-09 |
| 5 | 533 | F2 vs. L2 | + | Metabolism  | Bioenergetics | carbohydrate catabolic process                                                   | GO:0016052 | P | 146  | 1.73E-04 | 2.68E-03 |
| 5 | 534 | F2 vs. L2 | + | Metabolism  | Bioenergetics | carbohydrate derivative metabolic process                                        | GO:1901135 | P | 438  | 1.16E-05 | 2.79E-04 |
| 5 | 535 | F2 vs. L2 | + | Metabolism  | Bioenergetics | carbohydrate metabolic process                                                   | GO:0005975 | P | 524  | 5.11E-13 | 6.07E-11 |
| 5 | 536 | F2 vs. L2 | + | Metabolism  | Bioenergetics | cellular carbohydrate biosynthetic process                                       | GO:0034637 | P | 121  | 5.54E-06 | 1.48E-04 |
| 5 | 537 | F2 vs. L2 | + | Metabolism  | Bioenergetics | cellular carbohydrate metabolic process                                          | GO:0044262 | P | 229  | 7.85E-06 | 1.97E-04 |
| 5 | 538 | F2 vs. L2 | + | Metabolism  | Bioenergetics | cellular polysaccharide biosynthetic process                                     | GO:0033692 | P | 101  | 1.14E-04 | 1.94E-03 |
| 5 | 539 | F2 vs. L2 | + | Metabolism  | Bioenergetics | cellular polysaccharide metabolic process                                        | GO:0044264 | P | 160  | 1.06E-03 | 1.21E-02 |
| 5 | 540 | F2 vs. L2 | + | Metabolism  | Bioenergetics | cellular respiration                                                             | GO:0045333 | P | 82   | 1.27E-05 | 3.00E-04 |
| 5 | 541 | F2 vs. L2 | + | Metabolism  | Bioenergetics | electron transfer activity                                                       | GO:0009055 | F | 84   | 4.47E-05 | 1.99E-03 |
| 5 | 542 | F2 vs. L2 | + | Metabolism  | Bioenergetics | electron transport chain                                                         | GO:0022900 | P | 73   | 9.58E-06 | 2.37E-04 |
| 5 | 543 | F2 vs. L2 | + | Metabolism  | Bioenergetics | energy derivation by oxidation of organic compounds                              | GO:0015980 | P | 95   | 3.64E-05 | 7.38E-04 |
| 5 | 544 | F2 vs. L2 | + | Metabolism  | Bioenergetics | fatty acid biosynthetic process                                                  | GO:0006633 | P | 88   | 1.52E-05 | 3.52E-04 |
| 5 | 545 | F2 vs. L2 | + | Metabolism  | Bioenergetics | fatty acid metabolic process                                                     | GO:0006631 | P | 145  | 1.03E-06 | 3.63E-05 |
| 5 | 546 | F2 vs. L2 | + | Metabolism  | Bioenergetics | generation of precursor metabolites and energy                                   | GO:0006091 | P | 249  | 1.11E-14 | 1.92E-12 |
| 5 | 547 | F2 vs. L2 | + | Metabolism  | Bioenergetics | gluconeogenesis                                                                  | GO:0006094 | P | 19   | 1.69E-04 | 2.64E-03 |
| 5 | 548 | F2 vs. L2 | + | Metabolism  | Bioenergetics | glucose 6-phosphate metabolic process                                            | GO:0051156 | P | 30   | 3.08E-04 | 4.37E-03 |
| 5 | 549 | F2 vs. L2 | + | Metabolism  | Bioenergetics | glucose metabolic process                                                        | GO:0006006 | P | 30   | 3.16E-03 | 2.96E-02 |
| 5 | 550 | F2 vs. L2 | + | Metabolism  | Bioenergetics | hexose biosynthetic process                                                      | GO:0019319 | P | 22   | 8.29E-05 | 1.48E-03 |
| 5 | 551 | F2 vs. L2 | + | Metabolism  | Bioenergetics | mitochondrial envelope                                                           | GO:0005740 | C | 184  | 7.64E-03 | 3.82E-02 |
| 5 | 552 | F2 vs. L2 | + | Metabolism  | Bioenergetics | mitochondrial respirasome                                                        | GO:0005746 | C | 69   | 7.87E-03 | 3.91E-02 |
| 5 | 553 | F2 vs. L2 | + | Metabolism  | Bioenergetics | monosaccharide biosynthetic process                                              | GO:0046364 | P | 33   | 5.65E-05 | 1.07E-03 |
| 5 | 554 | F2 vs. L2 | + | Metabolism  | Bioenergetics | NAD binding                                                                      | GO:0051287 | F | 58   | 8.39E-04 | 2.17E-02 |
| 5 | 555 | F2 vs. L2 | + | Metabolism  | Bioenergetics | NAD(P)H dehydrogenase complex (plastoquinone)                                    | GO:0010598 | C | 7    | 1.92E-03 | 1.27E-02 |
| 5 | 556 | F2 vs. L2 | + | Metabolism  | Bioenergetics | NAD(P)H dehydrogenase complex assembly                                           | GO:0010275 | P | 7    | 3.18E-03 | 2.98E-02 |
| 5 | 557 | F2 vs. L2 | + | Metabolism  | Bioenergetics | NADH dehydrogenase complex (plastoquinone) assembly                              | GO:0010258 | P | 4    | 4.35E-03 | 3.88E-02 |
| 5 | 558 | F2 vs. L2 | + | Metabolism  | Bioenergetics | NADP metabolic process                                                           | GO:0006739 | P | 34   | 2.37E-05 | 5.16E-04 |
| 5 | 559 | F2 vs. L2 | + | Metabolism  | Bioenergetics | NADPH regeneration                                                               | GO:0006740 | P | 29   | 1.12E-04 | 1.90E-03 |
| 5 | 560 | F2 vs. L2 | + | Metabolism  | Bioenergetics | oxidoreductase activity                                                          | GO:0016491 | F | 758  | 0.00E+00 | 0.00E+00 |
| 5 | 561 | F2 vs. L2 | + | Metabolism  | Bioenergetics | oxidoreductase activity, acting on a sulfur group of donors                      | GO:0016667 | F | 58   | 1.49E-04 | 5.13E-03 |

|   |     |           |   |            |               |                                                                                                       |            |   |     |          |          |
|---|-----|-----------|---|------------|---------------|-------------------------------------------------------------------------------------------------------|------------|---|-----|----------|----------|
| 5 | 562 | F2 vs. L2 | + | Metabolism | Bioenergetics | oxidoreductase activity, acting on CH-OH group of donors                                              | GO:0016614 | F | 120 | 4.55E-05 | 2.00E-03 |
| 5 | 563 | F2 vs. L2 | + | Metabolism | Bioenergetics | oxidoreductase activity, acting on NAD(P)H                                                            | GO:0016651 | F | 70  | 1.24E-06 | 1.05E-04 |
| 5 | 564 | F2 vs. L2 | + | Metabolism | Bioenergetics | oxidoreductase activity, acting on NAD(P)H, quinone or similar compound as acceptor                   | GO:0016655 | F | 28  | 7.12E-04 | 1.96E-02 |
| 5 | 565 | F2 vs. L2 | + | Metabolism | Bioenergetics | oxidoreductase activity, acting on other nitrogenous compounds as donors                              | GO:0016661 | F | 4   | 2.28E-03 | 4.39E-02 |
| 5 | 566 | F2 vs. L2 | + | Metabolism | Bioenergetics | oxidoreductase activity, acting on paired donors, with incorporation or reduction of molecular oxygen | GO:0016705 | F | 182 | 9.25E-04 | 2.31E-02 |
| 5 | 567 | F2 vs. L2 | + | Metabolism | Bioenergetics | oxidoreductase activity, acting on single donors with incorporation of molecular oxygen               | GO:0016701 | F | 21  | 3.55E-05 | 1.64E-03 |
| 5 | 568 | F2 vs. L2 | + | Metabolism | Bioenergetics | oxidoreductase activity, acting on the aldehyde or oxo group of donors                                | GO:0016903 | F | 39  | 5.76E-05 | 2.45E-03 |
| 5 | 569 | F2 vs. L2 | + | Metabolism | Bioenergetics | oxidoreductase activity, acting on the aldehyde or oxo group of donors, NAD or NADP as acceptor       | GO:0016620 | F | 30  | 1.17E-04 | 4.32E-03 |
| 5 | 570 | F2 vs. L2 | + | Metabolism | Bioenergetics | oxidoreductase activity, acting on the CH-OH group of donors, NAD or NADP as acceptor                 | GO:0016616 | F | 106 | 1.75E-05 | 9.72E-04 |
| 5 | 571 | F2 vs. L2 | + | Metabolism | Bioenergetics | oxidoreductase complex                                                                                | GO:1990204 | C | 100 | 2.65E-06 | 3.60E-05 |
| 5 | 572 | F2 vs. L2 | + | Metabolism | Bioenergetics | pentose-phosphate shunt                                                                               | GO:0006098 | P | 27  | 5.91E-05 | 1.10E-03 |
| 5 | 573 | F2 vs. L2 | + | Metabolism | Bioenergetics | photorespiration                                                                                      | GO:0009853 | P | 29  | 2.28E-03 | 2.31E-02 |
| 5 | 574 | F2 vs. L2 | + | Metabolism | Bioenergetics | polysaccharide biosynthetic process                                                                   | GO:0000271 | P | 120 | 3.32E-05 | 6.84E-04 |
| 5 | 575 | F2 vs. L2 | + | Metabolism | Bioenergetics | polysaccharide metabolic process                                                                      | GO:0005976 | P | 243 | 3.80E-07 | 1.49E-05 |
| 5 | 576 | F2 vs. L2 | + | Metabolism | Bioenergetics | proton transmembrane transport                                                                        | GO:1902600 | P | 59  | 4.60E-07 | 1.78E-05 |
| 5 | 577 | F2 vs. L2 | + | Metabolism | Bioenergetics | proton-transporting ATPase activity, rotational mechanism                                             | GO:0046961 | F | 19  | 3.26E-04 | 9.95E-03 |
| 5 | 578 | F2 vs. L2 | + | Metabolism | Bioenergetics | proton-transporting two-sector ATPase complex                                                         | GO:0016469 | C | 41  | 3.91E-05 | 4.20E-04 |
| 5 | 579 | F2 vs. L2 | + | Metabolism | Bioenergetics | proton-transporting two-sector ATPase complex, catalytic domain                                       | GO:0033178 | C | 17  | 3.79E-03 | 2.15E-02 |
| 5 | 580 | F2 vs. L2 | + | Metabolism | Bioenergetics | proton-transporting two-sector ATPase complex, proton-transporting domain                             | GO:0033177 | C | 17  | 4.28E-03 | 2.37E-02 |
| 5 | 581 | F2 vs. L2 | + | Metabolism | Bioenergetics | proton-transporting V-type ATPase complex                                                             | GO:0033176 | C | 18  | 3.45E-04 | 2.80E-03 |
| 5 | 582 | F2 vs. L2 | + | Metabolism | Bioenergetics | proton-transporting V-type ATPase, V1 domain                                                          | GO:0033180 | C | 5   | 9.31E-03 | 4.43E-02 |
| 5 | 583 | F2 vs. L2 | + | Metabolism | Bioenergetics | pyrophosphate hydrolysis-driven proton transmembrane transporter activity                             | GO:0009678 | F | 34  | 3.43E-05 | 1.64E-03 |
| 5 | 584 | F2 vs. L2 | + | Metabolism | Bioenergetics | pyruvate metabolic process                                                                            | GO:0006090 | P | 58  | 1.43E-03 | 1.58E-02 |
| 5 | 585 | F2 vs. L2 | + | Metabolism | Bioenergetics | reductive pentose-phosphate cycle                                                                     | GO:0019253 | P | 14  | 6.92E-06 | 1.77E-04 |
| 5 | 586 | F2 vs. L2 | + | Metabolism | Bioenergetics | regulation of carbohydrate metabolic process                                                          | GO:0006109 | P | 46  | 4.80E-03 | 4.21E-02 |
| 5 | 587 | F2 vs. L2 | + | Metabolism | Bioenergetics | respirasome                                                                                           | GO:0070469 | C | 72  | 1.91E-03 | 1.28E-02 |
| 5 | 588 | F2 vs. L2 | + | Metabolism | Bioenergetics | respiratory chain complex                                                                             | GO:0098803 | C | 68  | 6.27E-03 | 3.26E-02 |
| 5 | 589 | F2 vs. L2 | + | Metabolism | Bioenergetics | tricarboxylic acid cycle                                                                              | GO:0006099 | P | 31  | 5.85E-05 | 1.09E-03 |
| 5 | 590 | F2 vs. L2 | + | Metabolism | Bioenergetics | unsaturated fatty acid biosynthetic process                                                           | GO:0006636 | P | 18  | 1.46E-04 | 2.37E-03 |
| 5 | 591 | F2 vs. L2 | + | Metabolism | Bioenergetics | unsaturated fatty acid metabolic process                                                              | GO:0033559 | P | 19  | 6.53E-05 | 1.20E-03 |
| 5 | 592 | F2 vs. L2 | + | Metabolism | Catabolism    | alpha-amino acid catabolic process                                                                    | GO:1901606 | P | 62  | 3.14E-06 | 9.07E-05 |
| 5 | 593 | F2 vs. L2 | + | Metabolism | Catabolism    | aromatic amino acid family catabolic process                                                          | GO:0009074 | P | 12  | 3.63E-04 | 4.89E-03 |
| 5 | 594 | F2 vs. L2 | + | Metabolism | Catabolism    | carboxylic acid catabolic process                                                                     | GO:0046395 | P | 107 | 1.05E-06 | 3.65E-05 |
| 5 | 595 | F2 vs. L2 | + | Metabolism | Catabolism    | catabolic process                                                                                     | GO:0009056 | P | 803 | 2.65E-03 | 2.62E-02 |
| 5 | 596 | F2 vs. L2 | + | Metabolism | Catabolism    | cellular amino acid catabolic process                                                                 | GO:0009063 | P | 65  | 1.36E-05 | 3.20E-04 |
| 5 | 597 | F2 vs. L2 | + | Metabolism | Catabolism    | cellular metabolic compound salvage                                                                   | GO:0043094 | P | 48  | 9.43E-04 | 1.09E-02 |
| 5 | 598 | F2 vs. L2 | + | Metabolism | Catabolism    | erythrose 4-phosphate/phosphoenolpyruvate family amino acid catabolic process                         | GO:1902222 | P | 9   | 4.15E-04 | 5.42E-03 |
| 5 | 599 | F2 vs. L2 | + | Metabolism | Catabolism    | glycine catabolic process                                                                             | GO:0006546 | P | 8   | 1.16E-04 | 1.95E-03 |
| 5 | 600 | F2 vs. L2 | + | Metabolism | Catabolism    | L-phenylalanine catabolic process                                                                     | GO:0006559 | P | 9   | 4.15E-04 | 5.43E-03 |
| 5 | 601 | F2 vs. L2 | + | Metabolism | Catabolism    | monocarboxylic acid catabolic process                                                                 | GO:0072329 | P | 43  | 3.62E-03 | 3.33E-02 |
| 5 | 602 | F2 vs. L2 | + | Metabolism | Catabolism    | organic acid catabolic process                                                                        | GO:0016054 | P | 107 | 1.05E-06 | 3.68E-05 |
| 5 | 603 | F2 vs. L2 | + | Metabolism | Catabolism    | organic hydroxy compound catabolic process                                                            | GO:1901616 | P | 31  | 2.36E-03 | 2.38E-02 |
| 5 | 604 | F2 vs. L2 | + | Metabolism | Catabolism    | pectin catabolic process                                                                              | GO:0045490 | P | 55  | 6.53E-04 | 8.16E-03 |
| 5 | 605 | F2 vs. L2 | + | Metabolism | Catabolism    | peroxisome                                                                                            | GO:0005777 | C | 182 | 7.53E-05 | 7.57E-04 |
| 5 | 606 | F2 vs. L2 | + | Metabolism | Catabolism    | phenol-containing compound catabolic process                                                          | GO:0019336 | P | 6   | 4.66E-03 | 4.11E-02 |
| 5 | 607 | F2 vs. L2 | + | Metabolism | Catabolism    | serine family amino acid catabolic process                                                            | GO:0009071 | P | 15  | 8.56E-04 | 1.02E-02 |
| 5 | 608 | F2 vs. L2 | + | Metabolism | Catabolism    | small molecule catabolic process                                                                      | GO:0044282 | P | 157 | 9.59E-07 | 3.47E-05 |
| 5 | 609 | F2 vs. L2 | + | Metabolism | Metabolism    | actin filament bundle assembly                                                                        | GO:0051017 | P | 15  | 1.77E-03 | 1.86E-02 |
| 5 | 610 | F2 vs. L2 | + | Metabolism | Metabolism    | actin filament bundle organization                                                                    | GO:0061572 | P | 15  | 1.77E-03 | 1.86E-02 |
| 5 | 611 | F2 vs. L2 | + | Metabolism | Metabolism    | alcohol metabolic process                                                                             | GO:0006066 | P | 63  | 4.65E-04 | 5.99E-03 |
| 5 | 612 | F2 vs. L2 | + | Metabolism | Metabolism    | alpha-amino acid biosynthetic process                                                                 | GO:1901607 | P | 117 | 1.49E-04 | 2.40E-03 |
| 5 | 613 | F2 vs. L2 | + | Metabolism | Metabolism    | alpha-amino acid metabolic process                                                                    | GO:1901605 | P | 184 | 1.53E-10 | 1.34E-08 |
| 5 | 614 | F2 vs. L2 | + | Metabolism | Metabolism    | aminoglycan metabolic process                                                                         | GO:0006022 | P | 10  | 5.32E-03 | 4.58E-02 |

|   |     |           |   |            |            |                                                                               |            |   |      |          |          |
|---|-----|-----------|---|------------|------------|-------------------------------------------------------------------------------|------------|---|------|----------|----------|
| 5 | 615 | F2 vs. L2 | + | Metabolism | Metabolism | ammonia assimilation cycle                                                    | GO:0019676 | P | 4    | 3.97E-03 | 3.61E-02 |
| 5 | 616 | F2 vs. L2 | + | Metabolism | Metabolism | anion binding                                                                 | GO:0043168 | F | 701  | 1.91E-03 | 3.90E-02 |
| 5 | 617 | F2 vs. L2 | + | Metabolism | Metabolism | anthocyanin-containing compound biosynthetic process                          | GO:0009718 | P | 10   | 5.38E-03 | 4.62E-02 |
| 5 | 618 | F2 vs. L2 | + | Metabolism | Metabolism | beta-glucan biosynthetic process                                              | GO:0051274 | P | 41   | 5.98E-03 | 4.99E-02 |
| 5 | 619 | F2 vs. L2 | + | Metabolism | Metabolism | biosynthetic process                                                          | GO:0009058 | P | 1567 | 3.57E-03 | 3.30E-02 |
| 5 | 620 | F2 vs. L2 | + | Metabolism | Metabolism | carbon utilization                                                            | GO:0015976 | P | 7    | 3.95E-03 | 3.60E-02 |
| 5 | 621 | F2 vs. L2 | + | Metabolism | Metabolism | carbon-carbon lyase activity                                                  | GO:0016830 | F | 71   | 3.46E-05 | 1.62E-03 |
| 5 | 622 | F2 vs. L2 | + | Metabolism | Metabolism | carbon-oxygen lyase activity                                                  | GO:0016835 | F | 89   | 1.94E-03 | 3.91E-02 |
| 5 | 623 | F2 vs. L2 | + | Metabolism | Metabolism | carboxylic acid biosynthetic process                                          | GO:0046394 | P | 283  | 1.82E-11 | 1.65E-09 |
| 5 | 624 | F2 vs. L2 | + | Metabolism | Metabolism | carboxylic acid metabolic process                                             | GO:0019752 | P | 568  | 0.00E+00 | 0.00E+00 |
| 5 | 625 | F2 vs. L2 | + | Metabolism | Metabolism | carboxylic ester hydrolase activity                                           | GO:0052689 | F | 106  | 1.38E-03 | 3.02E-02 |
| 5 | 626 | F2 vs. L2 | + | Metabolism | Metabolism | catalytic activity                                                            | GO:0003824 | F | 4291 | 2.01E-10 | 4.56E-08 |
| 5 | 627 | F2 vs. L2 | + | Metabolism | Metabolism | cation binding                                                                | GO:0043169 | F | 877  | 1.19E-06 | 1.05E-04 |
| 5 | 628 | F2 vs. L2 | + | Metabolism | Metabolism | cellular aldehyde metabolic process                                           | GO:0006081 | P | 36   | 5.02E-03 | 4.37E-02 |
| 5 | 629 | F2 vs. L2 | + | Metabolism | Metabolism | cellular amino acid biosynthetic process                                      | GO:0008652 | P | 129  | 3.29E-05 | 6.83E-04 |
| 5 | 630 | F2 vs. L2 | + | Metabolism | Metabolism | cellular amino acid metabolic process                                         | GO:0006520 | P | 241  | 1.50E-07 | 6.58E-06 |
| 5 | 631 | F2 vs. L2 | + | Metabolism | Metabolism | cellular lipid metabolic process                                              | GO:0044255 | P | 396  | 2.34E-08 | 1.19E-06 |
| 5 | 632 | F2 vs. L2 | + | Metabolism | Metabolism | cellular modified amino acid metabolic process                                | GO:0006575 | P | 51   | 5.39E-03 | 4.62E-02 |
| 5 | 633 | F2 vs. L2 | + | Metabolism | Metabolism | cellulose biosynthetic process                                                | GO:0030244 | P | 32   | 1.57E-03 | 1.70E-02 |
| 5 | 634 | F2 vs. L2 | + | Metabolism | Metabolism | cellulose metabolic process                                                   | GO:0030243 | P | 33   | 4.64E-03 | 4.11E-02 |
| 5 | 635 | F2 vs. L2 | + | Metabolism | Metabolism | cellulose synthase (UDP-forming) activity                                     | GO:0016760 | F | 17   | 9.68E-05 | 3.76E-03 |
| 5 | 636 | F2 vs. L2 | + | Metabolism | Metabolism | cellulose synthase activity                                                   | GO:0016759 | F | 20   | 4.07E-06 | 2.84E-04 |
| 5 | 637 | F2 vs. L2 | + | Metabolism | Metabolism | ceramide biosynthetic process                                                 | GO:0046513 | P | 6    | 5.23E-03 | 4.54E-02 |
| 5 | 638 | F2 vs. L2 | + | Metabolism | Metabolism | copper ion binding                                                            | GO:0005507 | F | 123  | 7.49E-08 | 1.02E-05 |
| 5 | 639 | F2 vs. L2 | + | Metabolism | Metabolism | coumarin metabolic process                                                    | GO:0009804 | P | 6    | 3.56E-03 | 3.30E-02 |
| 5 | 640 | F2 vs. L2 | + | Metabolism | Metabolism | dicarboxylic acid metabolic process                                           | GO:0043648 | P | 62   | 2.21E-04 | 3.34E-03 |
| 5 | 641 | F2 vs. L2 | + | Metabolism | Metabolism | dioxygenase activity                                                          | GO:0051213 | F | 61   | 2.56E-03 | 4.80E-02 |
| 5 | 642 | F2 vs. L2 | + | Metabolism | Metabolism | enzyme inhibitor activity                                                     | GO:0004857 | F | 77   | 8.89E-04 | 2.24E-02 |
| 5 | 643 | F2 vs. L2 | + | Metabolism | Metabolism | erythrose 4-phosphate/phosphoenolpyruvate family amino acid metabolic process | GO:1902221 | P | 14   | 6.76E-04 | 8.38E-03 |
| 5 | 644 | F2 vs. L2 | + | Metabolism | Metabolism | establishment of localization                                                 | GO:0051234 | P | 1241 | 6.05E-06 | 1.61E-04 |
| 5 | 645 | F2 vs. L2 | + | Metabolism | Metabolism | FMN binding                                                                   | GO:0010181 | F | 20   | 1.09E-03 | 2.58E-02 |
| 5 | 646 | F2 vs. L2 | + | Metabolism | Metabolism | galacturonan metabolic process                                                | GO:0010393 | P | 89   | 2.66E-06 | 7.87E-05 |
| 5 | 647 | F2 vs. L2 | + | Metabolism | Metabolism | glucan biosynthetic process                                                   | GO:0009250 | P | 74   | 2.56E-03 | 2.55E-02 |
| 5 | 648 | F2 vs. L2 | + | Metabolism | Metabolism | glucan metabolic process                                                      | GO:0044042 | P | 123  | 4.98E-03 | 4.34E-02 |
| 5 | 649 | F2 vs. L2 | + | Metabolism | Metabolism | glucosinolate biosynthetic process                                            | GO:0019761 | P | 23   | 1.01E-06 | 3.59E-05 |
| 5 | 650 | F2 vs. L2 | + | Metabolism | Metabolism | glucosinolate metabolic process                                               | GO:0019760 | P | 60   | 1.50E-06 | 4.73E-05 |
| 5 | 651 | F2 vs. L2 | + | Metabolism | Metabolism | glucosyltransferase activity                                                  | GO:0046527 | F | 108  | 1.82E-05 | 9.88E-04 |
| 5 | 652 | F2 vs. L2 | + | Metabolism | Metabolism | glutamine metabolic process                                                   | GO:0006541 | P | 9    | 9.57E-04 | 1.10E-02 |
| 5 | 653 | F2 vs. L2 | + | Metabolism | Metabolism | glycine cleavage complex                                                      | GO:0005960 | C | 5    | 1.89E-03 | 1.27E-02 |
| 5 | 654 | F2 vs. L2 | + | Metabolism | Metabolism | glycine decarboxylation via glycine cleavage system                           | GO:0019464 | P | 7    | 3.45E-04 | 4.71E-03 |
| 5 | 655 | F2 vs. L2 | + | Metabolism | Metabolism | glycine metabolic process                                                     | GO:0006544 | P | 15   | 5.73E-05 | 1.08E-03 |
| 5 | 656 | F2 vs. L2 | + | Metabolism | Metabolism | glucosinolate biosynthetic process                                            | GO:0019758 | P | 23   | 1.01E-06 | 3.57E-05 |
| 5 | 657 | F2 vs. L2 | + | Metabolism | Metabolism | glucosinolate metabolic process                                               | GO:0019757 | P | 60   | 1.50E-06 | 4.70E-05 |
| 5 | 658 | F2 vs. L2 | + | Metabolism | Metabolism | glycosyl compound biosynthetic process                                        | GO:1901659 | P | 37   | 4.94E-06 | 1.33E-04 |
| 5 | 659 | F2 vs. L2 | + | Metabolism | Metabolism | glycosyl compound metabolic process                                           | GO:1901657 | P | 104  | 2.52E-04 | 3.72E-03 |
| 5 | 660 | F2 vs. L2 | + | Metabolism | Metabolism | heme binding                                                                  | GO:0020037 | F | 168  | 1.89E-04 | 6.33E-03 |
| 5 | 661 | F2 vs. L2 | + | Metabolism | Metabolism | hydrolase activity, hydrolyzing O-glycosyl compounds                          | GO:0004553 | F | 182  | 3.11E-04 | 9.62E-03 |
| 5 | 662 | F2 vs. L2 | + | Metabolism | Metabolism | hydro-lyase activity                                                          | GO:0016836 | F | 50   | 7.35E-04 | 1.96E-02 |
| 5 | 663 | F2 vs. L2 | + | Metabolism | Metabolism | indole-containing compound metabolic process                                  | GO:0042430 | P | 35   | 5.59E-04 | 7.09E-03 |
| 5 | 664 | F2 vs. L2 | + | Metabolism | Metabolism | ion binding                                                                   | GO:0043167 | F | 1483 | 2.50E-06 | 1.94E-04 |
| 5 | 665 | F2 vs. L2 | + | Metabolism | Metabolism | iron ion binding                                                              | GO:0005506 | F | 148  | 1.31E-03 | 2.93E-02 |
| 5 | 666 | F2 vs. L2 | + | Metabolism | Metabolism | lignin biosynthetic process                                                   | GO:0009809 | P | 26   | 5.86E-03 | 4.92E-02 |
| 5 | 667 | F2 vs. L2 | + | Metabolism | Metabolism | lignin metabolic process                                                      | GO:0009808 | P | 35   | 3.11E-03 | 2.92E-02 |
| 5 | 668 | F2 vs. L2 | + | Metabolism | Metabolism | lipid biosynthetic process                                                    | GO:0008610 | P | 291  | 1.95E-05 | 4.44E-04 |
| 5 | 669 | F2 vs. L2 | + | Metabolism | Metabolism | lipid metabolic process                                                       | GO:0006629 | P | 464  | 3.35E-07 | 1.33E-05 |
| 5 | 670 | F2 vs. L2 | + | Metabolism | Metabolism | localization                                                                  | GO:0051179 | P | 1320 | 6.31E-06 | 1.66E-04 |
| 5 | 671 | F2 vs. L2 | + | Metabolism | Metabolism | L-phenylalanine metabolic process                                             | GO:0006558 | P | 14   | 6.76E-04 | 8.40E-03 |
| 5 | 672 | F2 vs. L2 | + | Metabolism | Metabolism | L-serine metabolic process                                                    | GO:0006563 | P | 21   | 2.50E-03 | 2.50E-02 |
| 5 | 673 | F2 vs. L2 | + | Metabolism | Metabolism | lyase activity                                                                | GO:0016829 | F | 194  | 2.42E-07 | 2.63E-05 |
| 5 | 674 | F2 vs. L2 | + | Metabolism | Metabolism | metal ion binding                                                             | GO:0046872 | F | 862  | 3.54E-06 | 2.60E-04 |
| 5 | 675 | F2 vs. L2 | + | Metabolism | Metabolism | methionine adenosyltransferase activity                                       | GO:0004478 | F | 4    | 2.54E-03 | 4.80E-02 |
| 5 | 676 | F2 vs. L2 | + | Metabolism | Metabolism | monocarboxylic acid biosynthetic process                                      | GO:0072330 | P | 130  | 3.81E-07 | 1.49E-05 |
| 5 | 677 | F2 vs. L2 | + | Metabolism | Metabolism | monocarboxylic acid metabolic process                                         | GO:0032787 | P | 290  | 4.18E-13 | 5.32E-11 |

|   |     |           |   |            |                |                                                                             |            |   |      |          |          |
|---|-----|-----------|---|------------|----------------|-----------------------------------------------------------------------------|------------|---|------|----------|----------|
| 5 | 678 | F2 vs. L2 | + | Metabolism | Metabolism     | monosaccharide metabolic process                                            | GO:0005996 | P | 84   | 2.64E-04 | 3.86E-03 |
| 5 | 679 | F2 vs. L2 | + | Metabolism | Metabolism     | nitrate assimilation                                                        | GO:0042128 | P | 9    | 2.96E-04 | 4.26E-03 |
| 5 | 680 | F2 vs. L2 | + | Metabolism | Metabolism     | nitrate metabolic process                                                   | GO:0042126 | P | 9    | 2.96E-04 | 4.25E-03 |
| 5 | 681 | F2 vs. L2 | + | Metabolism | Metabolism     | nitrogen cycle metabolic process                                            | GO:0071941 | P | 11   | 6.19E-04 | 7.75E-03 |
| 5 | 682 | F2 vs. L2 | + | Metabolism | Metabolism     | oligopeptide binding                                                        | GO:1900750 | F | 13   | 1.21E-04 | 4.27E-03 |
| 5 | 683 | F2 vs. L2 | + | Metabolism | Metabolism     | organic acid biosynthetic process                                           | GO:0016053 | P | 283  | 1.82E-11 | 1.68E-09 |
| 5 | 684 | F2 vs. L2 | + | Metabolism | Metabolism     | organic acid metabolic process                                              | GO:0006082 | P | 624  | 0.00E+00 | 0.00E+00 |
| 5 | 685 | F2 vs. L2 | + | Metabolism | Metabolism     | organic hydroxy compound biosynthetic process                               | GO:1901617 | P | 89   | 8.87E-04 | 1.04E-02 |
| 5 | 686 | F2 vs. L2 | + | Metabolism | Metabolism     | organic hydroxy compound metabolic process                                  | GO:1901615 | P | 166  | 2.00E-05 | 4.52E-04 |
| 5 | 687 | F2 vs. L2 | + | Metabolism | Metabolism     | organophosphate metabolic process                                           | GO:0019637 | P | 364  | 5.73E-05 | 1.07E-03 |
| 5 | 688 | F2 vs. L2 | + | Metabolism | Metabolism     | oxidation-reduction process                                                 | GO:0055114 | P | 442  | 0.00E+00 | 0.00E+00 |
| 5 | 689 | F2 vs. L2 | + | Metabolism | Metabolism     | oxoacid metabolic process                                                   | GO:0043436 | P | 623  | 0.00E+00 | 0.00E+00 |
| 5 | 690 | F2 vs. L2 | + | Metabolism | Metabolism     | oxylipin biosynthetic process                                               | GO:0031408 | P | 11   | 2.52E-05 | 5.39E-04 |
| 5 | 691 | F2 vs. L2 | + | Metabolism | Metabolism     | oxylipin metabolic process                                                  | GO:0031407 | P | 13   | 1.05E-04 | 1.82E-03 |
| 5 | 692 | F2 vs. L2 | + | Metabolism | Metabolism     | pectin metabolic process                                                    | GO:0045488 | P | 88   | 1.10E-06 | 3.76E-05 |
| 5 | 693 | F2 vs. L2 | + | Metabolism | Metabolism     | pectinesterase activity                                                     | GO:0030599 | F | 40   | 2.62E-03 | 4.89E-02 |
| 5 | 694 | F2 vs. L2 | + | Metabolism | Metabolism     | pectinesterase inhibitor activity                                           | GO:0046910 | F | 33   | 5.44E-04 | 1.57E-02 |
| 5 | 695 | F2 vs. L2 | + | Metabolism | Metabolism     | phenylpropanoid biosynthetic process                                        | GO:0009699 | P | 54   | 6.62E-04 | 8.25E-03 |
| 5 | 696 | F2 vs. L2 | + | Metabolism | Metabolism     | phenylpropanoid metabolic process                                           | GO:0009698 | P | 67   | 1.67E-04 | 2.62E-03 |
| 5 | 697 | F2 vs. L2 | + | Metabolism | Metabolism     | phosphorus metabolic process                                                | GO:0006793 | P | 1017 | 2.90E-03 | 2.84E-02 |
| 5 | 698 | F2 vs. L2 | + | Metabolism | Metabolism     | pigment metabolic process                                                   | GO:0042440 | P | 77   | 4.02E-03 | 3.65E-02 |
| 5 | 699 | F2 vs. L2 | + | Metabolism | Metabolism     | polyol metabolic process                                                    | GO:0019751 | P | 32   | 1.82E-03 | 1.90E-02 |
| 5 | 700 | F2 vs. L2 | + | Metabolism | Metabolism     | purine nucleoside triphosphate biosynthetic process                         | GO:0009145 | P | 29   | 2.13E-03 | 2.18E-02 |
| 5 | 701 | F2 vs. L2 | + | Metabolism | Metabolism     | purine nucleoside triphosphate metabolic process                            | GO:0009144 | P | 32   | 3.92E-03 | 3.58E-02 |
| 5 | 702 | F2 vs. L2 | + | Metabolism | Metabolism     | purine nucleotide metabolic process                                         | GO:0006163 | P | 139  | 2.04E-03 | 2.11E-02 |
| 5 | 703 | F2 vs. L2 | + | Metabolism | Metabolism     | purine ribonucleoside triphosphate biosynthetic process                     | GO:0009206 | P | 28   | 4.64E-03 | 4.10E-02 |
| 5 | 704 | F2 vs. L2 | + | Metabolism | Metabolism     | purine ribonucleoside triphosphate metabolic process                        | GO:0009205 | P | 28   | 4.64E-03 | 4.10E-02 |
| 5 | 705 | F2 vs. L2 | + | Metabolism | Metabolism     | purine ribonucleotide metabolic process                                     | GO:0009150 | P | 129  | 7.43E-04 | 9.04E-03 |
| 5 | 706 | F2 vs. L2 | + | Metabolism | Metabolism     | pyridoxal phosphate binding                                                 | GO:0030170 | F | 65   | 1.99E-04 | 6.54E-03 |
| 5 | 707 | F2 vs. L2 | + | Metabolism | Metabolism     | S-adenosylmethionine biosynthetic process                                   | GO:0006556 | P | 4    | 2.54E-03 | 2.54E-02 |
| 5 | 708 | F2 vs. L2 | + | Metabolism | Metabolism     | S-adenosylmethionine metabolic process                                      | GO:0046500 | P | 8    | 2.22E-04 | 3.35E-03 |
| 5 | 709 | F2 vs. L2 | + | Metabolism | Metabolism     | secondary metabolic process                                                 | GO:0019748 | P | 163  | 1.82E-10 | 1.54E-08 |
| 5 | 710 | F2 vs. L2 | + | Metabolism | Metabolism     | secondary metabolite biosynthetic process                                   | GO:0044550 | P | 87   | 1.60E-08 | 8.21E-07 |
| 5 | 711 | F2 vs. L2 | + | Metabolism | Metabolism     | serine family amino acid biosynthetic process                               | GO:0009070 | P | 29   | 3.54E-04 | 4.78E-03 |
| 5 | 712 | F2 vs. L2 | + | Metabolism | Metabolism     | serine family amino acid metabolic process                                  | GO:0009069 | P | 42   | 6.02E-07 | 2.29E-05 |
| 5 | 713 | F2 vs. L2 | + | Metabolism | Metabolism     | S-glycoside biosynthetic process                                            | GO:0016144 | P | 23   | 1.01E-06 | 3.62E-05 |
| 5 | 714 | F2 vs. L2 | + | Metabolism | Metabolism     | S-glycoside metabolic process                                               | GO:0016143 | P | 60   | 1.50E-06 | 4.76E-05 |
| 5 | 715 | F2 vs. L2 | + | Metabolism | Metabolism     | small molecule binding                                                      | GO:0036094 | F | 689  | 2.06E-03 | 4.02E-02 |
| 5 | 716 | F2 vs. L2 | + | Metabolism | Metabolism     | small molecule biosynthetic process                                         | GO:0044283 | P | 391  | 4.44E-16 | 1.13E-13 |
| 5 | 717 | F2 vs. L2 | + | Metabolism | Metabolism     | small molecule metabolic process                                            | GO:0044281 | P | 918  | 0.00E+00 | 0.00E+00 |
| 5 | 718 | F2 vs. L2 | + | Metabolism | Metabolism     | sphingolipid biosynthetic process                                           | GO:0030148 | P | 17   | 4.14E-04 | 5.46E-03 |
| 5 | 719 | F2 vs. L2 | + | Metabolism | Metabolism     | sphingolipid metabolic process                                              | GO:0006665 | P | 24   | 1.39E-04 | 2.29E-03 |
| 5 | 720 | F2 vs. L2 | + | Metabolism | Metabolism     | sulfur amino acid metabolic process                                         | GO:0000096 | P | 36   | 1.89E-04 | 2.91E-03 |
| 5 | 721 | F2 vs. L2 | + | Metabolism | Metabolism     | sulfur compound binding                                                     | GO:1901681 | F | 22   | 3.77E-05 | 1.71E-03 |
| 5 | 722 | F2 vs. L2 | + | Metabolism | Metabolism     | sulfur compound biosynthetic process                                        | GO:0044272 | P | 94   | 3.68E-13 | 4.81E-11 |
| 5 | 723 | F2 vs. L2 | + | Metabolism | Metabolism     | sulfur compound metabolic process                                           | GO:0006790 | P | 212  | 1.67E-15 | 3.56E-13 |
| 5 | 724 | F2 vs. L2 | + | Metabolism | Metabolism     | tetrapyrrole binding                                                        | GO:0046906 | F | 188  | 9.75E-05 | 3.73E-03 |
| 5 | 725 | F2 vs. L2 | + | Metabolism | Metabolism     | transferase activity, transferring alkyl or aryl (other than methyl) groups | GO:0016765 | F | 73   | 7.66E-06 | 5.08E-04 |
| 5 | 726 | F2 vs. L2 | + | Metabolism | Metabolism     | UDP-glucosyltransferase activity                                            | GO:0035251 | F | 84   | 2.99E-05 | 1.48E-03 |
| 5 | 727 | F2 vs. L2 | + | Metabolism | Metabolism     | UDP-glycosyltransferase activity                                            | GO:0008194 | F | 153  | 1.31E-06 | 1.08E-04 |
| 5 | 728 | F2 vs. L2 | + | Metabolism | Metabolism     | UDP-rhamnose biosynthetic process                                           | GO:0010253 | P | 4    | 2.20E-03 | 2.23E-02 |
| 5 | 729 | F2 vs. L2 | + | Metabolism | Metabolism     | UDP-rhamnose metabolic process                                              | GO:0033478 | P | 4    | 2.20E-03 | 2.24E-02 |
| 5 | 730 | F2 vs. L2 | + | Metabolism | Metabolism     | vitamin B6 binding                                                          | GO:0070279 | F | 65   | 1.99E-04 | 6.62E-03 |
| 5 | 731 | F2 vs. L2 | + | Metabolism | Metabolism     | vitamin binding                                                             | GO:0019842 | F | 81   | 3.80E-04 | 1.14E-02 |
| 5 | 732 | F2 vs. L2 | + | Metabolism | Photosynthesis | carbon fixation                                                             | GO:0015977 | P | 15   | 6.38E-06 | 1.66E-04 |
| 5 | 733 | F2 vs. L2 | + | Metabolism | Photosynthesis | chloroplast                                                                 | GO:0009507 | C | 2575 | 5.08E-10 | 1.36E-08 |
| 5 | 734 | F2 vs. L2 | + | Metabolism | Photosynthesis | chloroplast envelope                                                        | GO:0009941 | C | 418  | 5.62E-11 | 1.55E-09 |
| 5 | 735 | F2 vs. L2 | + | Metabolism | Photosynthesis | chloroplast stroma                                                          | GO:0009570 | C | 474  | 0.00E+00 | 0.00E+00 |
| 5 | 736 | F2 vs. L2 | + | Metabolism | Photosynthesis | chloroplast thylakoid                                                       | GO:0009534 | C | 282  | 0.00E+00 | 0.00E+00 |
| 5 | 737 | F2 vs. L2 | + | Metabolism | Photosynthesis | chloroplast thylakoid lumen                                                 | GO:0009543 | C | 32   | 6.16E-03 | 3.23E-02 |
| 5 | 738 | F2 vs. L2 | + | Metabolism | Photosynthesis | chloroplast thylakoid membrane                                              | GO:0009535 | C | 227  | 4.44E-16 | 1.95E-14 |
| 5 | 739 | F2 vs. L2 | + | Metabolism | Photosynthesis | fructose 1,6-bisphosphate metabolic process                                 | GO:0030388 | P | 11   | 3.41E-04 | 4.67E-03 |
| 5 | 740 | F2 vs. L2 | + | Metabolism | Photosynthesis | fructose-bisphosphate aldolase activity                                     | GO:0004332 | F | 8    | 1.57E-03 | 3.36E-02 |



|   |     |           |   |            |                |                                                                   |            |   |      |          |          |
|---|-----|-----------|---|------------|----------------|-------------------------------------------------------------------|------------|---|------|----------|----------|
| 5 | 741 | F2 vs. L2 | + | Metabolism | Photosynthesis | oxidative photosynthetic carbon pathway                           | GO:0009854 | P | 5    | 2.09E-03 | 2.15E-02 |
| 5 | 742 | F2 vs. L2 | + | Metabolism | Photosynthesis | photosynthesis                                                    | GO:0015979 | P | 130  | 4.70E-13 | 5.84E-11 |
| 5 | 743 | F2 vs. L2 | + | Metabolism | Photosynthesis | photosynthesis, dark reaction                                     | GO:0019685 | P | 14   | 6.92E-06 | 1.76E-04 |
| 5 | 744 | F2 vs. L2 | + | Metabolism | Photosynthesis | photosynthesis, light harvesting                                  | GO:0009765 | P | 29   | 6.71E-04 | 8.35E-03 |
| 5 | 745 | F2 vs. L2 | + | Metabolism | Photosynthesis | photosynthesis, light reaction                                    | GO:0019684 | P | 87   | 3.83E-09 | 2.35E-07 |
| 5 | 746 | F2 vs. L2 | + | Metabolism | Photosynthesis | photosynthetic electron transport chain                           | GO:0009767 | P | 30   | 2.49E-05 | 5.36E-04 |
| 5 | 747 | F2 vs. L2 | + | Metabolism | Photosynthesis | photosynthetic electron transport in photosystem I                | GO:0009773 | P | 12   | 3.60E-04 | 4.85E-03 |
| 5 | 748 | F2 vs. L2 | + | Metabolism | Photosynthesis | photosynthetic membrane                                           | GO:0034357 | C | 244  | 1.11E-16 | 6.30E-15 |
| 5 | 749 | F2 vs. L2 | + | Metabolism | Photosynthesis | photosystem II repair                                             | GO:0010206 | P | 12   | 1.84E-03 | 1.92E-02 |
| 5 | 750 | F2 vs. L2 | + | Metabolism | Photosynthesis | plastid                                                           | GO:0009536 | C | 2853 | 1.13E-08 | 2.42E-07 |
| 5 | 751 | F2 vs. L2 | + | Metabolism | Photosynthesis | plastid envelope                                                  | GO:0009526 | C | 436  | 3.53E-11 | 1.03E-09 |
| 5 | 752 | F2 vs. L2 | + | Metabolism | Photosynthesis | plastid stroma                                                    | GO:0009532 | C | 480  | 1.11E-16 | 6.70E-15 |
| 5 | 753 | F2 vs. L2 | + | Metabolism | Photosynthesis | plastid thylakoid                                                 | GO:0031976 | C | 282  | 0.00E+00 | 0.00E+00 |
| 5 | 754 | F2 vs. L2 | + | Metabolism | Photosynthesis | plastid thylakoid lumen                                           | GO:0031978 | C | 32   | 6.16E-03 | 3.21E-02 |
| 5 | 755 | F2 vs. L2 | + | Metabolism | Photosynthesis | plastid thylakoid membrane                                        | GO:0055035 | C | 228  | 4.44E-16 | 1.86E-14 |
| 5 | 756 | F2 vs. L2 | + | Metabolism | Photosynthesis | plastid translation                                               | GO:0032544 | P | 10   | 3.45E-03 | 3.21E-02 |
| 5 | 757 | F2 vs. L2 | + | Metabolism | Photosynthesis | plastoglobule                                                     | GO:0010287 | C | 48   | 1.12E-04 | 1.03E-03 |
| 5 | 758 | F2 vs. L2 | + | Metabolism | Photosynthesis | regulation of photosynthesis                                      | GO:0010109 | P | 24   | 1.07E-03 | 1.21E-02 |
| 5 | 759 | F2 vs. L2 | + | Metabolism | Photosynthesis | thylakoid                                                         | GO:0009579 | C | 337  | 0.00E+00 | 0.00E+00 |
| 5 | 760 | F2 vs. L2 | + | Metabolism | Photosynthesis | thylakoid lumen                                                   | GO:0031977 | C | 43   | 8.14E-05 | 8.01E-04 |
| 5 | 761 | F2 vs. L2 | + | Metabolism | Photosynthesis | thylakoid membrane                                                | GO:0042651 | C | 241  | 1.11E-16 | 5.10E-15 |
| 5 | 762 | F2 vs. L2 | + | Metabolism | Transporters   | active ion transmembrane transporter activity                     | GO:0022853 | F | 128  | 5.35E-09 | 9.70E-07 |
| 5 | 763 | F2 vs. L2 | + | Metabolism | Transporters   | active transmembrane transporter activity                         | GO:0022804 | F | 281  | 1.80E-13 | 8.16E-11 |
| 5 | 764 | F2 vs. L2 | + | Metabolism | Transporters   | amino acid transmembrane transporter activity                     | GO:0015171 | F | 49   | 1.99E-03 | 3.96E-02 |
| 5 | 765 | F2 vs. L2 | + | Metabolism | Transporters   | anion transmembrane transport                                     | GO:0098656 | P | 68   | 1.47E-03 | 1.62E-02 |
| 5 | 766 | F2 vs. L2 | + | Metabolism | Transporters   | anion transmembrane transporter activity                          | GO:0008509 | F | 193  | 3.63E-06 | 2.60E-04 |
| 5 | 767 | F2 vs. L2 | + | Metabolism | Transporters   | anion transport                                                   | GO:0006820 | P | 155  | 9.79E-06 | 2.41E-04 |
| 5 | 768 | F2 vs. L2 | + | Metabolism | Transporters   | antiporter activity                                               | GO:0015297 | F | 115  | 2.42E-09 | 5.06E-07 |
| 5 | 769 | F2 vs. L2 | + | Metabolism | Transporters   | ATPase-coupled cation transmembrane transporter activity          | GO:0019829 | F | 43   | 1.73E-07 | 2.14E-05 |
| 5 | 770 | F2 vs. L2 | + | Metabolism | Transporters   | ATPase-coupled ion transmembrane transporter activity             | GO:0042625 | F | 52   | 1.85E-06 | 1.48E-04 |
| 5 | 771 | F2 vs. L2 | + | Metabolism | Transporters   | ATPase-coupled transmembrane transporter activity                 | GO:0042626 | F | 122  | 2.44E-04 | 7.71E-03 |
| 5 | 772 | F2 vs. L2 | + | Metabolism | Transporters   | calcium ion transmembrane transport                               | GO:0070588 | P | 25   | 4.98E-03 | 4.35E-02 |
| 5 | 773 | F2 vs. L2 | + | Metabolism | Transporters   | carbohydrate transmembrane transport                              | GO:0034219 | P | 15   | 5.57E-03 | 4.71E-02 |
| 5 | 774 | F2 vs. L2 | + | Metabolism | Transporters   | carbohydrate transmembrane transporter activity                   | GO:0015144 | F | 57   | 8.91E-06 | 5.63E-04 |
| 5 | 775 | F2 vs. L2 | + | Metabolism | Transporters   | carbohydrate transport                                            | GO:0008643 | P | 39   | 1.03E-04 | 1.78E-03 |
| 5 | 776 | F2 vs. L2 | + | Metabolism | Transporters   | carboxylic acid transmembrane transporter activity                | GO:0046943 | F | 80   | 9.38E-04 | 2.32E-02 |
| 5 | 777 | F2 vs. L2 | + | Metabolism | Transporters   | cation transmembrane transport                                    | GO:0098655 | P | 133  | 5.70E-08 | 2.65E-06 |
| 5 | 778 | F2 vs. L2 | + | Metabolism | Transporters   | cation transmembrane transporter activity                         | GO:0008324 | F | 228  | 4.12E-09 | 8.01E-07 |
| 5 | 779 | F2 vs. L2 | + | Metabolism | Transporters   | cation transport                                                  | GO:0006812 | P | 214  | 8.38E-08 | 3.83E-06 |
| 5 | 780 | F2 vs. L2 | + | Metabolism | Transporters   | cytoplasmic vesicle                                               | GO:0031410 | C | 409  | 1.27E-04 | 1.16E-03 |
| 5 | 781 | F2 vs. L2 | + | Metabolism | Transporters   | endosome                                                          | GO:0005768 | C | 243  | 2.69E-03 | 1.64E-02 |
| 5 | 782 | F2 vs. L2 | + | Metabolism | Transporters   | inorganic anion transmembrane transport                           | GO:0098661 | P | 13   | 2.08E-03 | 2.14E-02 |
| 5 | 783 | F2 vs. L2 | + | Metabolism | Transporters   | inorganic anion transmembrane transporter activity                | GO:0015103 | F | 59   | 7.90E-06 | 5.12E-04 |
| 5 | 784 | F2 vs. L2 | + | Metabolism | Transporters   | inorganic anion transport                                         | GO:0015698 | P | 51   | 2.80E-06 | 8.18E-05 |
| 5 | 785 | F2 vs. L2 | + | Metabolism | Transporters   | inorganic cation transmembrane transport                          | GO:0098662 | P | 128  | 4.25E-08 | 2.05E-06 |
| 5 | 786 | F2 vs. L2 | + | Metabolism | Transporters   | inorganic cation transmembrane transporter activity               | GO:0022890 | F | 206  | 6.65E-09 | 1.13E-06 |
| 5 | 787 | F2 vs. L2 | + | Metabolism | Transporters   | inorganic ion transmembrane transport                             | GO:0098660 | P | 140  | 9.72E-10 | 7.13E-08 |
| 5 | 788 | F2 vs. L2 | + | Metabolism | Transporters   | inorganic molecular entity transmembrane transporter activity     | GO:0015318 | F | 364  | 5.44E-15 | 3.70E-12 |
| 5 | 789 | F2 vs. L2 | + | Metabolism | Transporters   | ion transmembrane transport                                       | GO:0034220 | P | 197  | 4.72E-10 | 3.89E-08 |
| 5 | 790 | F2 vs. L2 | + | Metabolism | Transporters   | ion transmembrane transporter activity                            | GO:0015075 | F | 398  | 1.25E-11 | 4.27E-09 |
|   |     |           |   |            |                | ion transmembrane transporter activity, phosphorylative mechanism | GO:0015662 | F | 32   | 7.98E-04 | 2.09E-02 |
| 5 | 791 | F2 vs. L2 | + | Metabolism | Transporters   | ion transport                                                     | GO:0006811 | P | 355  | 9.22E-12 | 9.14E-10 |
| 5 | 792 | F2 vs. L2 | + | Metabolism | Transporters   | metal ion transmembrane transporter activity                      | GO:0046873 | F | 118  | 1.38E-03 | 3.00E-02 |
|   |     |           |   |            |                |                                                                   |            |   |      |          |          |
| 5 | 794 | F2 vs. L2 | + | Metabolism | Transporters   | monovalent inorganic cation transmembrane transporter activity    | GO:0015077 | F | 124  | 3.69E-07 | 3.72E-05 |
| 5 | 795 | F2 vs. L2 | + | Metabolism | Transporters   | monovalent inorganic cation transport                             | GO:0015672 | P | 93   | 2.52E-07 | 1.03E-05 |
| 5 | 796 | F2 vs. L2 | + | Metabolism | Transporters   | neutral amino acid transmembrane transporter activity             | GO:0015175 | F | 12   | 6.40E-04 | 1.80E-02 |
| 5 | 797 | F2 vs. L2 | + | Metabolism | Transporters   | organic acid transmembrane transporter activity                   | GO:0005342 | F | 80   | 9.38E-04 | 2.30E-02 |
| 5 | 798 | F2 vs. L2 | + | Metabolism | Transporters   | organic anion transmembrane transporter activity                  | GO:0008514 | F | 130  | 1.53E-03 | 3.31E-02 |
| 5 | 799 | F2 vs. L2 | + | Metabolism | Transporters   | phosphate ion transmembrane transport                             | GO:0035435 | P | 10   | 4.33E-03 | 3.87E-02 |
| 5 | 800 | F2 vs. L2 | + | Metabolism | Transporters   | phosphate ion transport                                           | GO:0006817 | P | 20   | 8.72E-04 | 1.03E-02 |
| 5 | 801 | F2 vs. L2 | + | Metabolism | Transporters   | primary active transmembrane transporter activity                 | GO:0015399 | F | 136  | 1.75E-04 | 5.94E-03 |
| 5 | 802 | F2 vs. L2 | + | Metabolism | Transporters   | proton transmembrane transporter activity                         | GO:0015078 | F | 95   | 3.04E-08 | 4.60E-06 |

|   |     |           |   |                        |                      |                                                              |            |   |      |          |          |
|---|-----|-----------|---|------------------------|----------------------|--------------------------------------------------------------|------------|---|------|----------|----------|
| 5 | 803 | F2 vs. L2 | + | Metabolism             | Transporters         | secondary active transmembrane transporter activity          | GO:0015291 | F | 143  | 5.48E-11 | 1.35E-08 |
| 5 | 804 | F2 vs. L2 | + | Metabolism             | Transporters         | secretory vesicle                                            | GO:0099503 | C | 100  | 9.31E-04 | 6.75E-03 |
| 5 | 805 | F2 vs. L2 | + | Metabolism             | Transporters         | sugar transmembrane transporter activity                     | GO:0051119 | F | 24   | 6.46E-05 | 2.58E-03 |
| 5 | 806 | F2 vs. L2 | + | Metabolism             | Transporters         | trans-Golgi network                                          | GO:0005802 | C | 185  | 8.82E-08 | 1.52E-06 |
| 5 | 807 | F2 vs. L2 | + | Metabolism             | Transporters         | transition metal ion transmembrane transporter activity      | GO:0046915 | F | 38   | 2.00E-03 | 3.94E-02 |
| 5 | 808 | F2 vs. L2 | + | Metabolism             | Transporters         | transmembrane transport                                      | GO:0055085 | P | 487  | 4.23E-14 | 6.47E-12 |
| 5 | 809 | F2 vs. L2 | + | Metabolism             | Transporters         | transmembrane transporter activity                           | GO:0022857 | F | 689  | 0.00E+00 | 0.00E+00 |
| 5 | 810 | F2 vs. L2 | + | Metabolism             | Transporters         | transport                                                    | GO:0006810 | P | 1219 | 6.91E-06 | 1.78E-04 |
| 5 | 811 | F2 vs. L2 | + | Metabolism             | Transporters         | transporter activity                                         | GO:0005215 | F | 712  | 0.00E+00 | 0.00E+00 |
| 5 | 812 | F2 vs. L2 | + | Metabolism             | Transporters         | vesicle                                                      | GO:0031982 | C | 442  | 2.26E-05 | 2.56E-04 |
| 5 | 813 | F2 vs. L2 | + | Metabolism             | Transporters         | water channel activity                                       | GO:0015250 | F | 22   | 1.27E-03 | 2.86E-02 |
| 5 | 814 | F2 vs. L2 | + | Metabolism             | Transporters         | water transmembrane transporter activity                     | GO:0005372 | F | 22   | 1.27E-03 | 2.88E-02 |
| 5 | 815 | F2 vs. L2 | + | Metabolism             | Transporters         | xenobiotic transmembrane transporter activity                | GO:0042910 | F | 41   | 2.84E-04 | 8.88E-03 |
| 5 | 816 | F2 vs. L2 | + | Regulation             | Protein modification | Golgi apparatus                                              | GO:0005794 | C | 668  | 4.41E-09 | 1.04E-07 |
| 5 | 817 | F2 vs. L2 | + | Regulation             | Protein modification | modified amino acid binding                                  | GO:0072341 | F | 13   | 1.21E-04 | 4.39E-03 |
| 5 | 818 | F2 vs. L2 | + | Regulation             | Regulation           | regulation of cell morphogenesis involved in differentiation | GO:0010769 | P | 28   | 5.18E-07 | 1.99E-05 |
| 5 | 819 | F2 vs. L2 | + | Regulation             | Regulation           | regulation of pollen tube growth                             | GO:0080092 | P | 25   | 1.84E-07 | 7.94E-06 |
| 5 | 820 | F2 vs. L2 | + | Regulation             | Regulation           | regulation of secondary metabolite biosynthetic process      | GO:1900376 | P | 18   | 2.17E-03 | 2.22E-02 |
| 5 | 821 | F2 vs. L2 | + | Regulation             | Regulation           | regulation of small molecule metabolic process               | GO:0062012 | P | 61   | 1.46E-03 | 1.61E-02 |
| 5 | 822 | F2 vs. L2 | + | Regulation             | Regulation           | regulation of unidimensional cell growth                     | GO:0051510 | P | 46   | 1.61E-03 | 1.72E-02 |
| 5 | 823 | F2 vs. L2 | + | Regulation             | Translation          | poly(U) RNA binding                                          | GO:0008266 | F | 19   | 2.10E-03 | 4.07E-02 |
| 5 | 824 | F2 vs. L2 | + | Signaling and response | Signaling            | 1-phosphatidylinositol-4-phosphate 5-kinase activity         | GO:0016308 | F | 5    | 1.67E-03 | 3.52E-02 |
| 5 | 825 | F2 vs. L2 | + | Signaling and response | Signaling            | calcium ion binding                                          | GO:0005509 | F | 136  | 1.30E-05 | 7.55E-04 |
| 5 | 826 | F2 vs. L2 | + | Signaling and response | Signaling            | cellular response to blue light                              | GO:0071483 | P | 19   | 3.53E-03 | 3.28E-02 |
| 5 | 827 | F2 vs. L2 | + | Signaling and response | Signaling            | cellular response to chemical stimulus                       | GO:0070887 | P | 601  | 8.91E-04 | 1.04E-02 |
| 5 | 828 | F2 vs. L2 | + | Signaling and response | Signaling            | cellular response to extracellular stimulus                  | GO:0031668 | P | 113  | 1.68E-03 | 1.79E-02 |
| 5 | 829 | F2 vs. L2 | + | Signaling and response | Signaling            | cellular response to oxygen levels                           | GO:0071453 | P | 129  | 1.73E-03 | 1.83E-02 |
| 5 | 830 | F2 vs. L2 | + | Signaling and response | Signaling            | disulfide oxidoreductase activity                            | GO:0015036 | F | 36   | 2.11E-04 | 6.74E-03 |
| 5 | 831 | F2 vs. L2 | + | Signaling and response | Signaling            | jasmonic acid biosynthetic process                           | GO:0009695 | P | 17   | 9.54E-05 | 1.68E-03 |
| 5 | 832 | F2 vs. L2 | + | Signaling and response | Signaling            | jasmonic acid metabolic process                              | GO:0009694 | P | 32   | 1.21E-04 | 2.02E-03 |
| 5 | 833 | F2 vs. L2 | + | Signaling and response | Signaling            | multi-organism process                                       | GO:0051704 | P | 254  | 5.65E-04 | 7.15E-03 |
| 5 | 834 | F2 vs. L2 | + | Signaling and response | Signaling            | regulation of jasmonic acid mediated signaling pathway       | GO:2000022 | P | 27   | 2.97E-04 | 4.24E-03 |
| 5 | 835 | F2 vs. L2 | + | Signaling and response | Signaling            | response to abiotic stimulus                                 | GO:0009628 | P | 1213 | 4.93E-08 | 2.31E-06 |
| 5 | 836 | F2 vs. L2 | + | Signaling and response | Signaling            | response to acid chemical                                    | GO:0001101 | P | 230  | 3.52E-08 | 1.74E-06 |
| 5 | 837 | F2 vs. L2 | + | Signaling and response | Signaling            | response to bacterium                                        | GO:0009617 | P | 303  | 1.08E-09 | 7.60E-08 |
| 5 | 838 | F2 vs. L2 | + | Signaling and response | Signaling            | response to biotic stimulus                                  | GO:0009607 | P | 619  | 8.44E-09 | 4.61E-07 |
| 5 | 839 | F2 vs. L2 | + | Signaling and response | Signaling            | response to cadmium ion                                      | GO:0046686 | P | 224  | 1.13E-06 | 3.81E-05 |
| 5 | 840 | F2 vs. L2 | + | Signaling and response | Signaling            | response to chemical                                         | GO:0042221 | P | 1528 | 0.00E+00 | 0.00E+00 |
| 5 | 841 | F2 vs. L2 | + | Signaling and response | Signaling            | response to chitin                                           | GO:0010200 | P | 73   | 3.25E-06 | 9.21E-05 |
| 5 | 842 | F2 vs. L2 | + | Signaling and response | Signaling            | response to endogenous stimulus                              | GO:0009719 | P | 701  | 7.49E-06 | 1.89E-04 |
| 5 | 843 | F2 vs. L2 | + | Signaling and response | Signaling            | response to external biotic stimulus                         | GO:0043207 | P | 618  | 8.02E-09 | 4.56E-07 |
| 5 | 844 | F2 vs. L2 | + | Signaling and response | Signaling            | response to external stimulus                                | GO:0009605 | P | 845  | 4.98E-10 | 4.04E-08 |
| 5 | 845 | F2 vs. L2 | + | Signaling and response | Signaling            | response to extracellular stimulus                           | GO:0009991 | P | 141  | 2.11E-04 | 3.22E-03 |
| 5 | 846 | F2 vs. L2 | + | Signaling and response | Signaling            | response to hormone                                          | GO:0009725 | P | 684  | 3.24E-06 | 9.23E-05 |
| 5 | 847 | F2 vs. L2 | + | Signaling and response | Signaling            | response to inorganic substance                              | GO:0010035 | P | 564  | 1.02E-13 | 1.40E-11 |
| 5 | 848 | F2 vs. L2 | + | Signaling and response | Signaling            | response to jasmonic acid                                    | GO:0009753 | P | 104  | 6.09E-10 | 4.79E-08 |
| 5 | 849 | F2 vs. L2 | + | Signaling and response | Signaling            | response to karrikin                                         | GO:0080167 | P | 89   | 3.70E-05 | 7.42E-04 |
| 5 | 850 | F2 vs. L2 | + | Signaling and response | Signaling            | response to light intensity                                  | GO:0009642 | P | 80   | 4.07E-03 | 3.68E-02 |
| 5 | 851 | F2 vs. L2 | + | Signaling and response | Signaling            | response to light stimulus                                   | GO:0009416 | P | 403  | 1.49E-04 | 2.40E-03 |
| 5 | 852 | F2 vs. L2 | + | Signaling and response | Signaling            | response to lipid                                            | GO:0033993 | P | 395  | 1.51E-03 | 1.64E-02 |
| 5 | 853 | F2 vs. L2 | + | Signaling and response | Signaling            | response to metal ion                                        | GO:0010038 | P | 290  | 3.23E-07 | 1.29E-05 |
| 5 | 854 | F2 vs. L2 | + | Signaling and response | Signaling            | response to nitrogen compound                                | GO:1901698 | P | 163  | 4.03E-03 | 3.66E-02 |
| 5 | 855 | F2 vs. L2 | + | Signaling and response | Signaling            | response to nutrient levels                                  | GO:0031667 | P | 119  | 3.60E-03 | 3.32E-02 |
| 5 | 856 | F2 vs. L2 | + | Signaling and response | Signaling            | response to organic substance                                | GO:0010033 | P | 953  | 1.01E-08 | 5.41E-07 |
| 5 | 857 | F2 vs. L2 | + | Signaling and response | Signaling            | response to oxygen levels                                    | GO:0070482 | P | 149  | 2.42E-03 | 2.43E-02 |
| 5 | 858 | F2 vs. L2 | + | Signaling and response | Signaling            | response to oxygen-containing compound                       | GO:1901700 | P | 874  | 1.60E-14 | 2.67E-12 |
| 5 | 859 | F2 vs. L2 | + | Signaling and response | Signaling            | response to salicylic acid                                   | GO:0009751 | P | 78   | 1.40E-05 | 3.26E-04 |
| 5 | 860 | F2 vs. L2 | + | Signaling and response | Signaling            | response to stimulus                                         | GO:0050896 | P | 2983 | 9.11E-10 | 6.77E-08 |
| 5 | 861 | F2 vs. L2 | + | Signaling and response | Signaling            | response to temperature stimulus                             | GO:0009266 | P | 369  | 1.92E-04 | 2.94E-03 |
| 5 | 862 | F2 vs. L2 | + | Signaling and response | Signaling            | response to water                                            | GO:0009415 | P | 213  | 2.72E-09 | 1.71E-07 |
| 5 | 863 | F2 vs. L2 | + | Signaling and response | Stress               | anion homeostasis                                            | GO:0055081 | P | 29   | 1.25E-04 | 2.09E-03 |
| 5 | 864 | F2 vs. L2 | + | Signaling and response | Stress               | antioxidant activity                                         | GO:0016209 | F | 70   | 6.23E-05 | 2.53E-03 |
| 5 | 865 | F2 vs. L2 | + | Signaling and response | Stress               | cation homeostasis                                           | GO:0055080 | P | 127  | 9.77E-05 | 1.71E-03 |
| 5 | 866 | F2 vs. L2 | + | Signaling and response | Stress               | cellular detoxification                                      | GO:1900748 | P | 23   | 2.34E-04 | 3.50E-03 |

|   |     |           |   |                        |               |                                              |            |   |      |          |          |
|---|-----|-----------|---|------------------------|---------------|----------------------------------------------|------------|---|------|----------|----------|
| 5 | 867 | F2 vs. L2 | + | Signaling and response | Stress        | cellular homeostasis                         | GO:0019725 | P | 159  | 8.00E-04 | 9.64E-03 |
| 5 | 868 | F2 vs. L2 | + | Signaling and response | Stress        | cellular oxidant detoxification              | GO:0098869 | P | 15   | 6.37E-06 | 1.67E-04 |
| 5 | 869 | F2 vs. L2 | + | Signaling and response | Stress        | cellular response to decreased oxygen levels | GO:0036294 | P | 128  | 1.38E-03 | 1.54E-02 |
| 5 | 870 | F2 vs. L2 | + | Signaling and response | Stress        | cellular response to hypoxia                 | GO:0071456 | P | 126  | 2.16E-03 | 2.21E-02 |
| 5 | 871 | F2 vs. L2 | + | Signaling and response | Stress        | cellular response to light intensity         | GO:0071484 | P | 8    | 2.56E-03 | 2.55E-02 |
| 5 | 872 | F2 vs. L2 | + | Signaling and response | Stress        | cellular response to oxidative stress        | GO:0034599 | P | 41   | 3.02E-03 | 2.86E-02 |
| 5 | 873 | F2 vs. L2 | + | Signaling and response | Stress        | cellular response to oxygen radical          | GO:0071450 | P | 7    | 5.52E-03 | 4.69E-02 |
| 5 | 874 | F2 vs. L2 | + | Signaling and response | Stress        | cellular response to phosphate starvation    | GO:0016036 | P | 49   | 4.27E-03 | 3.83E-02 |
| 5 | 875 | F2 vs. L2 | + | Signaling and response | Stress        | cellular response to superoxide              | GO:0071451 | P | 7    | 5.52E-03 | 4.70E-02 |
| 5 | 876 | F2 vs. L2 | + | Signaling and response | Stress        | cellular response to toxic substance         | GO:0097237 | P | 24   | 7.94E-05 | 1.43E-03 |
| 5 | 877 | F2 vs. L2 | + | Signaling and response | Stress        | chemical homeostasis                         | GO:0048878 | P | 219  | 2.07E-06 | 6.32E-05 |
| 5 | 878 | F2 vs. L2 | + | Signaling and response | Stress        | defense response                             | GO:0006952 | P | 529  | 6.38E-06 | 1.66E-04 |
| 5 | 879 | F2 vs. L2 | + | Signaling and response | Stress        | defense response to bacterium                | GO:0042742 | P | 249  | 6.33E-09 | 3.72E-07 |
| 5 | 880 | F2 vs. L2 | + | Signaling and response | Stress        | defense response to Gram-negative bacterium  | GO:0050829 | P | 15   | 3.02E-03 | 2.86E-02 |
| 5 | 881 | F2 vs. L2 | + | Signaling and response | Stress        | defense response to other organism           | GO:0098542 | P | 451  | 3.84E-05 | 7.60E-04 |
| 5 | 882 | F2 vs. L2 | + | Signaling and response | Stress        | detoxification                               | GO:0098754 | P | 49   | 1.40E-08 | 7.32E-07 |
| 5 | 883 | F2 vs. L2 | + | Signaling and response | Stress        | flavonoid biosynthetic process               | GO:0009813 | P | 32   | 1.10E-04 | 1.88E-03 |
| 5 | 884 | F2 vs. L2 | + | Signaling and response | Stress        | flavonoid metabolic process                  | GO:0009812 | P | 38   | 3.26E-04 | 4.56E-03 |
| 5 | 885 | F2 vs. L2 | + | Signaling and response | Stress        | glutathione binding                          | GO:0043295 | F | 13   | 1.21E-04 | 4.33E-03 |
| 5 | 886 | F2 vs. L2 | + | Signaling and response | Stress        | glutathione metabolic process                | GO:0006749 | P | 21   | 7.81E-04 | 9.46E-03 |
| 5 | 887 | F2 vs. L2 | + | Signaling and response | Stress        | glutathione transferase activity             | GO:0004364 | F | 25   | 2.42E-05 | 1.24E-03 |
| 5 | 888 | F2 vs. L2 | + | Signaling and response | Stress        | homeostatic process                          | GO:0042592 | P | 287  | 4.21E-05 | 8.26E-04 |
| 5 | 889 | F2 vs. L2 | + | Signaling and response | Stress        | hydrogen peroxide catabolic process          | GO:0042744 | P | 15   | 2.92E-03 | 2.79E-02 |
| 5 | 890 | F2 vs. L2 | + | Signaling and response | Stress        | hydrogen peroxide metabolic process          | GO:0042743 | P | 21   | 1.16E-04 | 1.96E-03 |
| 5 | 891 | F2 vs. L2 | + | Signaling and response | Stress        | hydrogen peroxide transmembrane transport    | GO:0080170 | P | 5    | 1.37E-03 | 1.53E-02 |
| 5 | 892 | F2 vs. L2 | + | Signaling and response | Stress        | inorganic ion homeostasis                    | GO:0098771 | P | 137  | 2.35E-05 | 5.14E-04 |
| 5 | 893 | F2 vs. L2 | + | Signaling and response | Stress        | interspecies interaction between organisms   | GO:0044419 | P | 630  | 8.16E-09 | 4.55E-07 |
| 5 | 894 | F2 vs. L2 | + | Signaling and response | Stress        | ion homeostasis                              | GO:0050801 | P | 157  | 9.01E-07 | 3.30E-05 |
| 5 | 895 | F2 vs. L2 | + | Signaling and response | Stress        | monovalent inorganic cation homeostasis      | GO:0055067 | P | 41   | 6.97E-05 | 1.26E-03 |
| 5 | 896 | F2 vs. L2 | + | Signaling and response | Stress        | protein repair                               | GO:0030091 | P | 19   | 1.07E-04 | 1.84E-03 |
| 5 | 897 | F2 vs. L2 | + | Signaling and response | Stress        | reactive nitrogen species metabolic process  | GO:2001057 | P | 11   | 4.76E-03 | 4.18E-02 |
| 5 | 898 | F2 vs. L2 | + | Signaling and response | Stress        | reactive oxygen species metabolic process    | GO:0072593 | P | 44   | 2.71E-06 | 7.97E-05 |
| 5 | 899 | F2 vs. L2 | + | Signaling and response | Stress        | regulation of pH                             | GO:0006885 | P | 30   | 5.57E-04 | 7.07E-03 |
| 5 | 900 | F2 vs. L2 | + | Signaling and response | Stress        | regulation of stomatal movement              | GO:0010119 | P | 52   | 4.86E-03 | 4.25E-02 |
| 5 | 901 | F2 vs. L2 | + | Signaling and response | Stress        | removal of superoxide radicals               | GO:0019430 | P | 7    | 5.52E-03 | 4.68E-02 |
| 5 | 902 | F2 vs. L2 | + | Signaling and response | Stress        | response to abscisic acid                    | GO:0009737 | P | 289  | 7.86E-05 | 1.42E-03 |
| 5 | 903 | F2 vs. L2 | + | Signaling and response | Stress        | response to alcohol                          | GO:0097305 | P | 292  | 1.88E-04 | 2.90E-03 |
| 5 | 904 | F2 vs. L2 | + | Signaling and response | Stress        | response to cold                             | GO:0009409 | P | 254  | 9.55E-09 | 5.16E-07 |
| 5 | 905 | F2 vs. L2 | + | Signaling and response | Stress        | response to decreased oxygen levels          | GO:0036293 | P | 148  | 1.99E-03 | 2.06E-02 |
| 5 | 906 | F2 vs. L2 | + | Signaling and response | Stress        | response to desiccation                      | GO:0009269 | P | 16   | 1.63E-03 | 1.74E-02 |
| 5 | 907 | F2 vs. L2 | + | Signaling and response | Stress        | response to fungus                           | GO:0009620 | P | 192  | 2.60E-03 | 2.58E-02 |
| 5 | 908 | F2 vs. L2 | + | Signaling and response | Stress        | response to high light intensity             | GO:0009644 | P | 39   | 3.96E-04 | 5.24E-03 |
| 5 | 909 | F2 vs. L2 | + | Signaling and response | Stress        | response to hypoxia                          | GO:0001666 | P | 146  | 2.99E-03 | 2.85E-02 |
| 5 | 910 | F2 vs. L2 | + | Signaling and response | Stress        | response to insect                           | GO:0009625 | P | 20   | 1.49E-03 | 1.63E-02 |
| 5 | 911 | F2 vs. L2 | + | Signaling and response | Stress        | response to osmotic stress                   | GO:0006970 | P | 307  | 4.25E-03 | 3.81E-02 |
| 5 | 912 | F2 vs. L2 | + | Signaling and response | Stress        | response to other organism                   | GO:0051707 | P | 618  | 8.02E-09 | 4.52E-07 |
| 5 | 913 | F2 vs. L2 | + | Signaling and response | Stress        | response to oxidative stress                 | GO:0006979 | P | 255  | 4.82E-06 | 1.30E-04 |
| 5 | 914 | F2 vs. L2 | + | Signaling and response | Stress        | response to oxygen radical                   | GO:0000305 | P | 9    | 5.46E-03 | 4.66E-02 |
| 5 | 915 | F2 vs. L2 | + | Signaling and response | Stress        | response to ozone                            | GO:0010193 | P | 23   | 9.43E-04 | 1.09E-02 |
| 5 | 916 | F2 vs. L2 | + | Signaling and response | Stress        | response to radiation                        | GO:0009314 | P | 419  | 1.30E-03 | 1.46E-02 |
| 5 | 917 | F2 vs. L2 | + | Signaling and response | Stress        | response to reactive oxygen species          | GO:0000302 | P | 95   | 3.91E-04 | 5.22E-03 |
| 5 | 918 | F2 vs. L2 | + | Signaling and response | Stress        | response to stress                           | GO:0006950 | P | 1724 | 2.11E-06 | 6.34E-05 |
| 5 | 919 | F2 vs. L2 | + | Signaling and response | Stress        | response to superoxide                       | GO:0000303 | P | 9    | 5.46E-03 | 4.66E-02 |
| 5 | 920 | F2 vs. L2 | + | Signaling and response | Stress        | response to toxic substance                  | GO:0009636 | P | 60   | 6.78E-09 | 3.90E-07 |
| 5 | 921 | F2 vs. L2 | + | Signaling and response | Stress        | response to UV-B                             | GO:0010224 | P | 48   | 1.59E-03 | 1.71E-02 |
| 5 | 922 | F2 vs. L2 | + | Signaling and response | Stress        | response to water deprivation                | GO:0009414 | P | 209  | 2.57E-09 | 1.66E-07 |
| 5 | 923 | F2 vs. L2 | + | Signaling and response | Stress        | response to wounding                         | GO:0009611 | P | 137  | 2.12E-14 | 3.34E-12 |
| 5 | 924 | F2 vs. L2 | + | Signaling and response | Stress        | superoxide metabolic process                 | GO:0006801 | P | 7    | 5.52E-03 | 4.71E-02 |
| 5 | 925 | F2 vs. L2 | + | Signaling and response | Stress        | toxin catabolic process                      | GO:0009407 | P | 20   | 1.38E-04 | 2.28E-03 |
| 5 | 926 | F2 vs. L2 | + | Signaling and response | Stress        | toxin metabolic process                      | GO:0009404 | P | 30   | 3.22E-06 | 9.23E-05 |
| 5 | 927 | F2 vs. L2 | - | Development            | Cell division | alpha DNA polymerase:primase complex         | GO:0005658 | C | 4    | 2.57E-03 | 1.59E-02 |
| 5 | 928 | F2 vs. L2 | - | Development            | Cell division | ATP-dependent microtubule motor activity     | GO:1990939 | F | 10   | 1.71E-03 | 3.57E-02 |
| 5 | 929 | F2 vs. L2 | - | Development            | Cell division | base-excision repair                         | GO:0006284 | P | 17   | 3.71E-04 | 4.96E-03 |
| 5 | 930 | F2 vs. L2 | - | Development            | Cell division | bub1-bub3 complex                            | GO:1990298 | C | 3    | 6.91E-03 | 3.53E-02 |



|   |     |           |   |             |               |                                                                     |            |   |     |          |          |
|---|-----|-----------|---|-------------|---------------|---------------------------------------------------------------------|------------|---|-----|----------|----------|
| 5 | 931 | F2 vs. L2 | - | Development | Cell division | Cajal body                                                          | GO:0015030 | C | 12  | 7.43E-03 | 3.76E-02 |
| 5 | 932 | F2 vs. L2 | - | Development | Cell division | cell cycle                                                          | GO:0007049 | P | 250 | 1.05E-14 | 1.88E-12 |
| 5 | 933 | F2 vs. L2 | - | Development | Cell division | cell cycle checkpoint                                               | GO:0000075 | P | 24  | 4.39E-05 | 8.48E-04 |
| 5 | 934 | F2 vs. L2 | - | Development | Cell division | cell cycle DNA replication                                          | GO:0044786 | P | 19  | 1.50E-03 | 1.64E-02 |
| 5 | 935 | F2 vs. L2 | - | Development | Cell division | cell cycle DNA replication initiation                               | GO:1902292 | P | 4   | 1.11E-03 | 1.25E-02 |
| 5 | 936 | F2 vs. L2 | - | Development | Cell division | cell cycle phase transition                                         | GO:0044770 | P | 30  | 2.10E-06 | 6.36E-05 |
| 5 | 937 | F2 vs. L2 | - | Development | Cell division | cell cycle process                                                  | GO:0022402 | P | 227 | 1.11E-15 | 2.58E-13 |
| 5 | 938 | F2 vs. L2 | - | Development | Cell division | chromatin assembly                                                  | GO:0031497 | P | 42  | 1.10E-04 | 1.88E-03 |
| 5 | 939 | F2 vs. L2 | - | Development | Cell division | chromosome                                                          | GO:0005694 | C | 265 | 2.00E-15 | 7.42E-14 |
| 5 | 940 | F2 vs. L2 | - | Development | Cell division | chromosome passenger complex                                        | GO:0032133 | C | 3   | 9.27E-03 | 4.43E-02 |
| 5 | 941 | F2 vs. L2 | - | Development | Cell division | chromosome segregation                                              | GO:0007059 | P | 57  | 1.64E-04 | 2.58E-03 |
| 5 | 942 | F2 vs. L2 | - | Development | Cell division | chromosome, centromeric region                                      | GO:0000775 | C | 27  | 7.64E-06 | 9.83E-05 |
| 5 | 943 | F2 vs. L2 | - | Development | Cell division | condensed chromosome                                                | GO:0000793 | C | 35  | 1.37E-04 | 1.23E-03 |
| 5 | 944 | F2 vs. L2 | - | Development | Cell division | condensed chromosome kinetochore                                    | GO:0000777 | C | 6   | 8.54E-03 | 4.20E-02 |
| 5 | 945 | F2 vs. L2 | - | Development | Cell division | condensed chromosome, centromeric region                            | GO:0000779 | C | 14  | 4.44E-03 | 2.42E-02 |
| 5 | 946 | F2 vs. L2 | - | Development | Cell division | condensed nuclear chromosome                                        | GO:0000794 | C | 22  | 2.88E-03 | 1.71E-02 |
| 5 | 947 | F2 vs. L2 | - | Development | Cell division | condensed nuclear chromosome, centromeric region                    | GO:0000780 | C | 10  | 7.50E-03 | 3.77E-02 |
| 5 | 948 | F2 vs. L2 | - | Development | Cell division | cyclin-dependent protein kinase holoenzyme complex                  | GO:0000307 | C | 33  | 5.25E-05 | 5.50E-04 |
| 5 | 949 | F2 vs. L2 | - | Development | Cell division | cyclin-dependent protein serine/threonine kinase regulator activity | GO:0016538 | F | 23  | 9.81E-06 | 5.93E-04 |
| 5 | 950 | F2 vs. L2 | - | Development | Cell division | cytokinesis by cell plate formation                                 | GO:0000911 | P | 42  | 2.94E-07 | 1.18E-05 |
| 5 | 951 | F2 vs. L2 | - | Development | Cell division | delta DNA polymerase complex                                        | GO:0043625 | C | 4   | 9.15E-03 | 4.39E-02 |
| 5 | 952 | F2 vs. L2 | - | Development | Cell division | DNA biosynthetic process                                            | GO:0071897 | P | 17  | 1.11E-05 | 2.69E-04 |
| 5 | 953 | F2 vs. L2 | - | Development | Cell division | DNA duplex unwinding                                                | GO:0032508 | P | 22  | 7.78E-04 | 9.44E-03 |
| 5 | 954 | F2 vs. L2 | - | Development | Cell division | DNA helicase activity                                               | GO:0003678 | F | 35  | 1.24E-05 | 7.31E-04 |
| 5 | 955 | F2 vs. L2 | - | Development | Cell division | DNA helicase complex                                                | GO:0033202 | C | 9   | 1.46E-03 | 1.02E-02 |
| 5 | 956 | F2 vs. L2 | - | Development | Cell division | DNA integrity checkpoint                                            | GO:0031570 | P | 11  | 4.59E-04 | 5.95E-03 |
| 5 | 957 | F2 vs. L2 | - | Development | Cell division | DNA packaging                                                       | GO:0006323 | P | 53  | 2.39E-03 | 2.40E-02 |
| 5 | 958 | F2 vs. L2 | - | Development | Cell division | DNA polymerase complex                                              | GO:0042575 | C | 13  | 6.38E-05 | 6.62E-04 |
| 5 | 959 | F2 vs. L2 | - | Development | Cell division | DNA recombination                                                   | GO:0006310 | P | 73  | 2.63E-06 | 7.82E-05 |
| 5 | 960 | F2 vs. L2 | - | Development | Cell division | DNA repair                                                          | GO:0006281 | P | 172 | 6.22E-15 | 1.19E-12 |
| 5 | 961 | F2 vs. L2 | - | Development | Cell division | DNA replication                                                     | GO:0006260 | P | 69  | 5.70E-14 | 8.24E-12 |
| 5 | 962 | F2 vs. L2 | - | Development | Cell division | DNA replication checkpoint                                          | GO:0000076 | P | 8   | 2.00E-03 | 2.07E-02 |
| 5 | 963 | F2 vs. L2 | - | Development | Cell division | DNA replication factor A complex                                    | GO:0005662 | C | 8   | 6.45E-04 | 4.90E-03 |
| 5 | 964 | F2 vs. L2 | - | Development | Cell division | DNA replication factor C complex                                    | GO:0005663 | C | 7   | 8.27E-03 | 4.09E-02 |
| 5 | 965 | F2 vs. L2 | - | Development | Cell division | DNA replication initiation                                          | GO:0006270 | P | 14  | 5.97E-07 | 2.28E-05 |
| 5 | 966 | F2 vs. L2 | - | Development | Cell division | DNA replication origin binding                                      | GO:0003688 | F | 12  | 7.61E-06 | 5.17E-04 |
| 5 | 967 | F2 vs. L2 | - | Development | Cell division | DNA strand elongation                                               | GO:0022616 | P | 11  | 1.21E-06 | 3.99E-05 |
| 5 | 968 | F2 vs. L2 | - | Development | Cell division | DNA strand elongation involved in DNA replication                   | GO:0006271 | P | 11  | 1.21E-06 | 4.01E-05 |
| 5 | 969 | F2 vs. L2 | - | Development | Cell division | DNA unwinding involved in DNA replication                           | GO:0006268 | P | 13  | 2.58E-04 | 3.80E-03 |
| 5 | 970 | F2 vs. L2 | - | Development | Cell division | DNA-(apurinic or apyrimidinic site) endonuclease activity           | GO:0003906 | F | 7   | 5.74E-04 | 1.64E-02 |
| 5 | 971 | F2 vs. L2 | - | Development | Cell division | DNA-dependent DNA replication                                       | GO:0006261 | P | 60  | 4.71E-13 | 5.72E-11 |
| 5 | 972 | F2 vs. L2 | - | Development | Cell division | DNA-directed DNA polymerase activity                                | GO:0003887 | F | 12  | 2.49E-03 | 4.73E-02 |
| 5 | 973 | F2 vs. L2 | - | Development | Cell division | double-strand break repair                                          | GO:0006302 | P | 70  | 1.12E-06 | 3.82E-05 |
| 5 | 974 | F2 vs. L2 | - | Development | Cell division | double-strand break repair via break-induced replication            | GO:0000727 | P | 7   | 1.60E-03 | 1.71E-02 |
| 5 | 975 | F2 vs. L2 | - | Development | Cell division | double-strand break repair via homologous recombination             | GO:0000724 | P | 48  | 4.30E-05 | 8.33E-04 |
| 5 | 976 | F2 vs. L2 | - | Development | Cell division | endonuclease activity                                               | GO:0004519 | F | 49  | 1.13E-03 | 2.65E-02 |
| 5 | 977 | F2 vs. L2 | - | Development | Cell division | G1/S transition of mitotic cell cycle                               | GO:0000082 | P | 7   | 4.71E-03 | 4.15E-02 |
| 5 | 978 | F2 vs. L2 | - | Development | Cell division | kinetochore                                                         | GO:0000776 | C | 15  | 6.72E-05 | 6.90E-04 |
| 5 | 979 | F2 vs. L2 | - | Development | Cell division | MCM complex                                                         | GO:0042555 | C | 6   | 4.04E-04 | 3.25E-03 |
| 5 | 980 | F2 vs. L2 | - | Development | Cell division | meiotic cell cycle                                                  | GO:0051321 | P | 83  | 2.28E-04 | 3.42E-03 |
| 5 | 981 | F2 vs. L2 | - | Development | Cell division | meiotic cell cycle process                                          | GO:1903046 | P | 74  | 1.22E-03 | 1.36E-02 |
| 5 | 982 | F2 vs. L2 | - | Development | Cell division | meiotic nuclear division                                            | GO:0140013 | P | 49  | 3.79E-03 | 3.47E-02 |
| 5 | 983 | F2 vs. L2 | - | Development | Cell division | microtubule cytoskeleton organization involved in mitosis           | GO:1902850 | P | 14  | 3.93E-05 | 7.72E-04 |
| 5 | 984 | F2 vs. L2 | - | Development | Cell division | microtubule motor activity                                          | GO:0003777 | F | 34  | 2.47E-05 | 1.24E-03 |
| 5 | 985 | F2 vs. L2 | - | Development | Cell division | mismatch repair                                                     | GO:0006298 | P | 12  | 2.33E-03 | 2.36E-02 |
| 5 | 986 | F2 vs. L2 | - | Development | Cell division | mitotic cell cycle                                                  | GO:0000278 | P | 146 | 1.03E-07 | 4.60E-06 |
| 5 | 987 | F2 vs. L2 | - | Development | Cell division | mitotic cell cycle checkpoint                                       | GO:0007093 | P | 19  | 3.98E-04 | 5.26E-03 |
| 5 | 988 | F2 vs. L2 | - | Development | Cell division | mitotic cell cycle phase transition                                 | GO:0044772 | P | 29  | 1.08E-06 | 3.73E-05 |
| 5 | 989 | F2 vs. L2 | - | Development | Cell division | mitotic cell cycle process                                          | GO:1903047 | P | 121 | 5.41E-09 | 3.25E-07 |
| 5 | 990 | F2 vs. L2 | - | Development | Cell division | mitotic checkpoint complex                                          | GO:0033597 | C | 4   | 1.57E-03 | 1.08E-02 |
| 5 | 991 | F2 vs. L2 | - | Development | Cell division | mitotic DNA integrity checkpoint                                    | GO:0044774 | P | 6   | 2.94E-03 | 2.81E-02 |
| 5 | 992 | F2 vs. L2 | - | Development | Cell division | mitotic DNA replication                                             | GO:1902969 | P | 6   | 1.81E-03 | 1.89E-02 |
| 5 | 993 | F2 vs. L2 | - | Development | Cell division | mitotic DNA replication initiation                                  | GO:1902975 | P | 4   | 1.11E-03 | 1.26E-02 |



|   |      |           |   |             |               |                                                                                 |            |   |      |          |          |
|---|------|-----------|---|-------------|---------------|---------------------------------------------------------------------------------|------------|---|------|----------|----------|
| 5 | 994  | F2 vs. L2 | - | Development | Cell division | mitotic G2/M transition checkpoint                                              | GO:0044818 | P | 5    | 5.24E-03 | 4.54E-02 |
| 5 | 995  | F2 vs. L2 | - | Development | Cell division | mitotic nuclear division                                                        | GO:0140014 | P | 35   | 2.59E-04 | 3.81E-03 |
| 5 | 996  | F2 vs. L2 | - | Development | Cell division | mitotic spindle                                                                 | GO:0072686 | C | 7    | 2.67E-03 | 1.64E-02 |
| 5 | 997  | F2 vs. L2 | - | Development | Cell division | mitotic spindle assembly checkpoint                                             | GO:0007094 | P | 9    | 2.92E-03 | 2.85E-02 |
| 5 | 998  | F2 vs. L2 | - | Development | Cell division | mitotic spindle checkpoint                                                      | GO:0071174 | P | 9    | 2.92E-03 | 2.82E-02 |
| 5 | 999  | F2 vs. L2 | - | Development | Cell division | mitotic spindle organization                                                    | GO:0007052 | P | 12   | 3.27E-04 | 4.56E-03 |
| 5 | 1000 | F2 vs. L2 | - | Development | Cell division | negative regulation of cell cycle                                               | GO:0045786 | P | 38   | 2.11E-05 | 4.74E-04 |
| 5 | 1001 | F2 vs. L2 | - | Development | Cell division | negative regulation of cell cycle G2/M phase transition                         | GO:1902750 | P | 5    | 5.24E-03 | 4.53E-02 |
| 5 | 1002 | F2 vs. L2 | - | Development | Cell division | negative regulation of cell cycle phase transition                              | GO:1901988 | P | 15   | 2.28E-05 | 4.99E-04 |
| 5 | 1003 | F2 vs. L2 | - | Development | Cell division | negative regulation of cell cycle process                                       | GO:0010948 | P | 26   | 6.58E-05 | 1.20E-03 |
| 5 | 1004 | F2 vs. L2 | - | Development | Cell division | negative regulation of chromosome organization                                  | GO:2001251 | P | 11   | 3.02E-04 | 4.31E-03 |
| 5 | 1005 | F2 vs. L2 | - | Development | Cell division | negative regulation of chromosome segregation                                   | GO:0051985 | P | 9    | 2.92E-03 | 2.84E-02 |
| 5 | 1006 | F2 vs. L2 | - | Development | Cell division | negative regulation of chromosome separation                                    | GO:1905819 | P | 9    | 2.92E-03 | 2.79E-02 |
| 5 | 1007 | F2 vs. L2 | - | Development | Cell division | negative regulation of G2/M transition of mitotic cell cycle                    | GO:0010972 | P | 5    | 5.24E-03 | 4.53E-02 |
|   |      |           |   |             |               |                                                                                 |            |   |      |          |          |
| 5 | 1008 | F2 vs. L2 | - | Development | Cell division | negative regulation of metaphase/anaphase transition of cell cycle              | GO:1902100 | P | 9    | 2.92E-03 | 2.81E-02 |
| 5 | 1009 | F2 vs. L2 | - | Development | Cell division | negative regulation of mitotic cell cycle                                       | GO:0045930 | P | 25   | 8.02E-04 | 9.64E-03 |
| 5 | 1010 | F2 vs. L2 | - | Development | Cell division | negative regulation of mitotic cell cycle phase transition                      | GO:1901991 | P | 15   | 2.28E-05 | 5.01E-04 |
| 5 | 1011 | F2 vs. L2 | - | Development | Cell division | negative regulation of mitotic metaphase/anaphase transition                    | GO:0045841 | P | 9    | 2.92E-03 | 2.80E-02 |
| 5 | 1012 | F2 vs. L2 | - | Development | Cell division | negative regulation of mitotic sister chromatid segregation                     | GO:0033048 | P | 9    | 2.92E-03 | 2.83E-02 |
| 5 | 1013 | F2 vs. L2 | - | Development | Cell division | negative regulation of mitotic sister chromatid separation                      | GO:2000816 | P | 9    | 2.92E-03 | 2.84E-02 |
| 5 | 1014 | F2 vs. L2 | - | Development | Cell division | negative regulation of nuclear division                                         | GO:0051784 | P | 16   | 2.05E-03 | 2.12E-02 |
| 5 | 1015 | F2 vs. L2 | - | Development | Cell division | negative regulation of sister chromatid segregation                             | GO:0033046 | P | 9    | 2.92E-03 | 2.82E-02 |
| 5 | 1016 | F2 vs. L2 | - | Development | Cell division | nuclear cell cycle DNA replication initiation                                   | GO:1902315 | P | 4    | 1.11E-03 | 1.25E-02 |
| 5 | 1017 | F2 vs. L2 | - | Development | Cell division | nuclear chromosome segregation                                                  | GO:0098813 | P | 50   | 3.53E-04 | 4.78E-03 |
| 5 | 1018 | F2 vs. L2 | - | Development | Cell division | nuclear division                                                                | GO:0000280 | P | 78   | 1.34E-06 | 4.29E-05 |
| 5 | 1019 | F2 vs. L2 | - | Development | Cell division | nuclear DNA replication                                                         | GO:0033260 | P | 9    | 1.62E-04 | 2.57E-03 |
| 5 | 1020 | F2 vs. L2 | - | Development | Cell division | nuclear origin of replication recognition complex                               | GO:0005664 | C | 4    | 4.35E-03 | 2.40E-02 |
| 5 | 1021 | F2 vs. L2 | - | Development | Cell division | nuclear replication fork                                                        | GO:0043596 | C | 18   | 1.99E-07 | 3.15E-06 |
| 5 | 1022 | F2 vs. L2 | - | Development | Cell division | nuclease activity                                                               | GO:0004518 | F | 90   | 2.06E-04 | 6.68E-03 |
| 5 | 1023 | F2 vs. L2 | - | Development | Cell division | nucleic acid metabolic process                                                  | GO:0090304 | P | 866  | 0.00E+00 | 0.00E+00 |
| 5 | 1024 | F2 vs. L2 | - | Development | Cell division | nucleobase-containing compound metabolic process                                | GO:0006139 | P | 1111 | 0.00E+00 | 0.00E+00 |
| 5 | 1025 | F2 vs. L2 | - | Development | Cell division | nucleosome assembly                                                             | GO:0006334 | P | 26   | 1.21E-03 | 1.36E-02 |
| 5 | 1026 | F2 vs. L2 | - | Development | Cell division | nucleotide-excision repair                                                      | GO:0006289 | P | 29   | 2.98E-05 | 6.29E-04 |
| 5 | 1027 | F2 vs. L2 | - | Development | Cell division | origin recognition complex                                                      | GO:0000808 | C | 4    | 4.35E-03 | 2.38E-02 |
| 5 | 1028 | F2 vs. L2 | - | Development | Cell division | preprophase band                                                                | GO:0009574 | C | 10   | 2.06E-03 | 1.33E-02 |
| 5 | 1029 | F2 vs. L2 | - | Development | Cell division | preprophase band assembly                                                       | GO:0000913 | P | 6    | 4.76E-03 | 4.17E-02 |
| 5 | 1030 | F2 vs. L2 | - | Development | Cell division | pre-replicative complex assembly                                                | GO:0036388 | P | 5    | 1.40E-03 | 1.55E-02 |
|   |      |           |   |             |               |                                                                                 |            |   |      |          |          |
| 5 | 1031 | F2 vs. L2 | - | Development | Cell division | pre-replicative complex assembly involved in cell cycle DNA replication         | GO:1902299 | P | 5    | 1.40E-03 | 1.56E-02 |
|   |      |           |   |             |               |                                                                                 |            |   |      |          |          |
| 5 | 1032 | F2 vs. L2 | - | Development | Cell division | pre-replicative complex assembly involved in nuclear cell cycle DNA replication | GO:0006267 | P | 5    | 1.40E-03 | 1.56E-02 |
| 5 | 1033 | F2 vs. L2 | - | Development | Cell division | recombinational repair                                                          | GO:0000725 | P | 51   | 3.39E-05 | 6.91E-04 |
| 5 | 1034 | F2 vs. L2 | - | Development | Cell division | regulation of cell cycle                                                        | GO:0051726 | P | 134  | 2.51E-13 | 3.36E-11 |
| 5 | 1035 | F2 vs. L2 | - | Development | Cell division | regulation of cell cycle G2/M phase transition                                  | GO:1902749 | P | 18   | 3.46E-04 | 4.70E-03 |
| 5 | 1036 | F2 vs. L2 | - | Development | Cell division | regulation of cell cycle phase transition                                       | GO:1901987 | P | 35   | 1.01E-07 | 4.55E-06 |
| 5 | 1037 | F2 vs. L2 | - | Development | Cell division | regulation of cell cycle process                                                | GO:0010564 | P | 75   | 1.67E-10 | 1.44E-08 |
| 5 | 1038 | F2 vs. L2 | - | Development | Cell division | regulation of cell division                                                     | GO:0051302 | P | 35   | 1.04E-05 | 2.56E-04 |
| 5 | 1039 | F2 vs. L2 | - | Development | Cell division | regulation of cell population proliferation                                     | GO:0042127 | P | 42   | 1.57E-03 | 1.70E-02 |
| 5 | 1040 | F2 vs. L2 | - | Development | Cell division | regulation of chromatin organization                                            | GO:1902275 | P | 35   | 9.33E-04 | 1.09E-02 |
| 5 | 1041 | F2 vs. L2 | - | Development | Cell division | regulation of chromosome organization                                           | GO:0033044 | P | 39   | 1.61E-06 | 5.00E-05 |
| 5 | 1042 | F2 vs. L2 | - | Development | Cell division | regulation of chromosome segregation                                            | GO:0051983 | P | 16   | 4.84E-04 | 6.21E-03 |
| 5 | 1043 | F2 vs. L2 | - | Development | Cell division | regulation of chromosome separation                                             | GO:1905818 | P | 15   | 3.34E-04 | 4.59E-03 |
| 5 | 1044 | F2 vs. L2 | - | Development | Cell division | regulation of cyclin-dependent protein kinase activity                          | GO:1904029 | P | 22   | 6.81E-04 | 8.39E-03 |
| 5 | 1045 | F2 vs. L2 | - | Development | Cell division | regulation of DNA metabolic process                                             | GO:0051052 | P | 44   | 3.95E-04 | 5.24E-03 |
| 5 | 1046 | F2 vs. L2 | - | Development | Cell division | regulation of DNA replication                                                   | GO:0006275 | P | 31   | 2.72E-04 | 3.97E-03 |
| 5 | 1047 | F2 vs. L2 | - | Development | Cell division | regulation of DNA-dependent DNA replication                                     | GO:0090329 | P | 25   | 3.30E-03 | 3.07E-02 |
| 5 | 1048 | F2 vs. L2 | - | Development | Cell division | regulation of G2/M transition of mitotic cell cycle                             | GO:0010389 | P | 18   | 3.46E-04 | 4.69E-03 |
| 5 | 1049 | F2 vs. L2 | - | Development | Cell division | regulation of metaphase/anaphase transition of cell cycle                       | GO:1902099 | P | 15   | 3.34E-04 | 4.61E-03 |
| 5 | 1050 | F2 vs. L2 | - | Development | Cell division | regulation of mitotic cell cycle                                                | GO:0007346 | P | 50   | 4.40E-06 | 1.22E-04 |
| 5 | 1051 | F2 vs. L2 | - | Development | Cell division | regulation of mitotic cell cycle phase transition                               | GO:1901990 | P | 34   | 2.05E-07 | 8.48E-06 |
| 5 | 1052 | F2 vs. L2 | - | Development | Cell division | regulation of mitotic metaphase/anaphase transition                             | GO:0030071 | P | 15   | 3.34E-04 | 4.62E-03 |
| 5 | 1053 | F2 vs. L2 | - | Development | Cell division | regulation of mitotic nuclear division                                          | GO:0007088 | P | 18   | 5.65E-03 | 4.75E-02 |
| 5 | 1054 | F2 vs. L2 | - | Development | Cell division | regulation of mitotic sister chromatid segregation                              | GO:0033047 | P | 9    | 2.92E-03 | 2.83E-02 |

|   |      |           |   |             |               |                                                   |            |   |      |          |          |
|---|------|-----------|---|-------------|---------------|---------------------------------------------------|------------|---|------|----------|----------|
| 5 | 1055 | F2 vs. L2 | - | Development | Cell division | regulation of mitotic sister chromatid separation | GO:0010965 | P | 15   | 3.34E-04 | 4.63E-03 |
| 5 | 1056 | F2 vs. L2 | - | Development | Cell division | regulation of nuclear division                    | GO:0051783 | P | 29   | 3.24E-04 | 4.54E-03 |
| 5 | 1057 | F2 vs. L2 | - | Development | Cell division | regulation of sister chromatid segregation        | GO:0033045 | P | 16   | 4.84E-04 | 6.20E-03 |
| 5 | 1058 | F2 vs. L2 | - | Development | Cell division | replication fork                                  | GO:0005657 | C | 28   | 3.93E-09 | 9.48E-08 |
| 5 | 1059 | F2 vs. L2 | - | Development | Cell division | replisome                                         | GO:0030894 | C | 17   | 5.50E-08 | 9.83E-07 |
| 5 | 1060 | F2 vs. L2 | - | Development | Cell division | RNA metabolic process                             | GO:0016070 | P | 666  | 0.00E+00 | 0.00E+00 |
| 5 | 1061 | F2 vs. L2 | - | Development | Cell division | single-stranded DNA binding                       | GO:0003697 | F | 41   | 3.45E-06 | 2.60E-04 |
| 5 | 1062 | F2 vs. L2 | - | Development | Cell division | sister chromatid segregation                      | GO:0000819 | P | 35   | 8.64E-04 | 1.03E-02 |
| 5 | 1063 | F2 vs. L2 | - | Development | Cell division | site of double-strand break                       | GO:0035861 | C | 6    | 1.08E-02 | 4.96E-02 |
| 5 | 1064 | F2 vs. L2 | - | Development | Cell division | spindle                                           | GO:0005819 | C | 43   | 3.52E-09 | 8.70E-08 |
| 5 | 1065 | F2 vs. L2 | - | Development | Cell division | spindle assembly                                  | GO:0051225 | P | 21   | 3.68E-05 | 7.40E-04 |
| 5 | 1066 | F2 vs. L2 | - | Development | Cell division | spindle assembly checkpoint                       | GO:0071173 | P | 9    | 2.92E-03 | 2.81E-02 |
| 5 | 1067 | F2 vs. L2 | - | Development | Cell division | spindle checkpoint                                | GO:0031577 | P | 9    | 2.92E-03 | 2.80E-02 |
| 5 | 1068 | F2 vs. L2 | - | Development | Cell division | spindle microtubule                               | GO:0005876 | C | 13   | 1.76E-05 | 2.07E-04 |
| 5 | 1069 | F2 vs. L2 | - | Development | Cell division | spindle midzone                                   | GO:0051233 | C | 4    | 2.10E-03 | 1.35E-02 |
| 5 | 1070 | F2 vs. L2 | - | Development | Cell division | spindle organization                              | GO:0007051 | P | 31   | 1.24E-06 | 3.99E-05 |
| 5 | 1071 | F2 vs. L2 | - | Development | Cell division | telomere maintenance                              | GO:0000723 | P | 16   | 1.46E-04 | 2.38E-03 |
| 5 | 1072 | F2 vs. L2 | - | Development | Cell division | telomere organization                             | GO:0032200 | P | 16   | 1.46E-04 | 2.37E-03 |
| 5 | 1073 | F2 vs. L2 | - | Development | Cell division | telomeric DNA binding                             | GO:0042162 | F | 14   | 1.92E-03 | 3.89E-02 |
| 5 | 1074 | F2 vs. L2 | - | Development | Development   | anatomical structure homeostasis                  | GO:0060249 | P | 18   | 1.40E-04 | 2.31E-03 |
| 5 | 1075 | F2 vs. L2 | - | Development | Development   | cellular component assembly                       | GO:0022607 | P | 475  | 1.15E-06 | 3.86E-05 |
| 5 | 1076 | F2 vs. L2 | - | Development | Development   | cellular component biogenesis                     | GO:0044085 | P | 733  | 2.06E-06 | 6.34E-05 |
| 5 | 1077 | F2 vs. L2 | - | Development | Development   | cellular component organization                   | GO:0016043 | P | 1327 | 7.43E-05 | 1.34E-03 |
| 5 | 1078 | F2 vs. L2 | - | Development | Development   | cellular component organization or biogenesis     | GO:0071840 | P | 1540 | 4.58E-06 | 1.26E-04 |
| 5 | 1079 | F2 vs. L2 | - | Development | Development   | chromatin                                         | GO:0000785 | C | 167  | 8.29E-05 | 8.08E-04 |
| 5 | 1080 | F2 vs. L2 | - | Development | Development   | chromatin assembly or disassembly                 | GO:0006333 | P | 48   | 1.08E-05 | 2.63E-04 |
| 5 | 1081 | F2 vs. L2 | - | Development | Development   | chromatin organization                            | GO:0006325 | P | 183  | 1.61E-14 | 2.61E-12 |
| 5 | 1082 | F2 vs. L2 | - | Development | Development   | chromocenter                                      | GO:0010369 | C | 6    | 9.38E-03 | 4.44E-02 |
| 5 | 1083 | F2 vs. L2 | - | Development | Development   | chromosomal region                                | GO:0098687 | C | 35   | 9.86E-09 | 2.16E-07 |
| 5 | 1084 | F2 vs. L2 | - | Development | Development   | chromosome organization                           | GO:0051276 | P | 275  | 0.00E+00 | 0.00E+00 |
| 5 | 1085 | F2 vs. L2 | - | Development | Development   | chromosome, telomeric region                      | GO:0000781 | C | 7    | 6.48E-04 | 4.88E-03 |
| 5 | 1086 | F2 vs. L2 | - | Development | Development   | cytoskeleton                                      | GO:0005856 | C | 177  | 1.97E-03 | 1.29E-02 |
| 5 | 1087 | F2 vs. L2 | - | Development | Development   | embryo development                                | GO:0009790 | P | 311  | 4.76E-06 | 1.29E-04 |
| 5 | 1088 | F2 vs. L2 | - | Development | Development   | embryo development ending in seed dormancy        | GO:0009793 | P | 304  | 6.65E-06 | 1.72E-04 |
| 5 | 1089 | F2 vs. L2 | - | Development | Development   | fruit development                                 | GO:0010154 | P | 428  | 3.66E-04 | 4.91E-03 |
| 5 | 1090 | F2 vs. L2 | - | Development | Development   | Golgi cis cisterna                                | GO:0000137 | C | 26   | 9.62E-03 | 4.51E-02 |
| 5 | 1091 | F2 vs. L2 | - | Development | Development   | heterochromatin                                   | GO:0000792 | C | 8    | 5.54E-03 | 2.94E-02 |
| 5 | 1092 | F2 vs. L2 | - | Development | Development   | heterochromatin organization                      | GO:0070828 | P | 22   | 9.58E-04 | 1.10E-02 |
| 5 | 1093 | F2 vs. L2 | - | Development | Development   | intracellular non-membrane-bounded organelle      | GO:0043232 | C | 974  | 0.00E+00 | 0.00E+00 |
| 5 | 1094 | F2 vs. L2 | - | Development | Development   | intracellular organelle lumen                     | GO:0070013 | C | 749  | 0.00E+00 | 0.00E+00 |
| 5 | 1095 | F2 vs. L2 | - | Development | Development   | kinetochore microtubule                           | GO:0005828 | C | 4    | 4.51E-03 | 2.43E-02 |
| 5 | 1096 | F2 vs. L2 | - | Development | Development   | leaf vascular tissue pattern formation            | GO:0010305 | P | 20   | 3.03E-03 | 2.86E-02 |
| 5 | 1097 | F2 vs. L2 | - | Development | Development   | membrane-enclosed lumen                           | GO:0031974 | C | 749  | 0.00E+00 | 0.00E+00 |
| 5 | 1098 | F2 vs. L2 | - | Development | Development   | meristem development                              | GO:0048507 | P | 113  | 1.28E-04 | 2.13E-03 |
| 5 | 1099 | F2 vs. L2 | - | Development | Development   | microtubule                                       | GO:0005874 | C | 87   | 3.21E-07 | 5.00E-06 |
| 5 | 1100 | F2 vs. L2 | - | Development | Development   | microtubule associated complex                    | GO:0005875 | C | 44   | 1.59E-07 | 2.56E-06 |
| 5 | 1101 | F2 vs. L2 | - | Development | Development   | microtubule cytoskeleton                          | GO:0015630 | C | 130  | 5.79E-09 | 1.33E-07 |
| 5 | 1102 | F2 vs. L2 | - | Development | Development   | microtubule cytoskeleton organization             | GO:0000226 | P | 97   | 1.54E-04 | 2.46E-03 |
| 5 | 1103 | F2 vs. L2 | - | Development | Development   | microtubule-based movement                        | GO:0007018 | P | 35   | 2.18E-05 | 4.87E-04 |
| 5 | 1104 | F2 vs. L2 | - | Development | Development   | microtubule-based process                         | GO:0007017 | P | 128  | 7.87E-08 | 3.63E-06 |
| 5 | 1105 | F2 vs. L2 | - | Development | Development   | movement of cell or subcellular component         | GO:0006928 | P | 48   | 5.44E-04 | 6.93E-03 |
| 5 | 1106 | F2 vs. L2 | - | Development | Development   | non-membrane-bounded organelle                    | GO:0043228 | C | 974  | 0.00E+00 | 0.00E+00 |
| 5 | 1107 | F2 vs. L2 | - | Development | Development   | nuclear body                                      | GO:0016604 | C | 73   | 3.86E-05 | 4.19E-04 |
| 5 | 1108 | F2 vs. L2 | - | Development | Development   | nuclear chromatin                                 | GO:0000790 | C | 135  | 4.51E-03 | 2.44E-02 |
| 5 | 1109 | F2 vs. L2 | - | Development | Development   | nuclear chromosome                                | GO:0000228 | C | 180  | 7.67E-09 | 1.72E-07 |
| 5 | 1110 | F2 vs. L2 | - | Development | Development   | nuclear chromosome, telomeric region              | GO:0000784 | C | 5    | 9.57E-03 | 4.51E-02 |
| 5 | 1111 | F2 vs. L2 | - | Development | Development   | nuclear envelope                                  | GO:0005635 | C | 57   | 3.04E-04 | 2.51E-03 |
| 5 | 1112 | F2 vs. L2 | - | Development | Development   | nuclear lumen                                     | GO:0031981 | C | 659  | 0.00E+00 | 0.00E+00 |
| 5 | 1113 | F2 vs. L2 | - | Development | Development   | nuclear pore                                      | GO:0005643 | C | 27   | 3.49E-03 | 2.01E-02 |
| 5 | 1114 | F2 vs. L2 | - | Development | Development   | nuclear pore outer ring                           | GO:0031080 | C | 6    | 1.05E-02 | 4.86E-02 |
| 5 | 1115 | F2 vs. L2 | - | Development | Development   | nuclear replisome                                 | GO:0043601 | C | 17   | 5.50E-08 | 1.00E-06 |
| 5 | 1116 | F2 vs. L2 | - | Development | Development   | nucleic acid phosphodiester bond hydrolysis       | GO:0090305 | P | 41   | 4.74E-06 | 1.29E-04 |
| 5 | 1117 | F2 vs. L2 | - | Development | Development   | nucleoplasm                                       | GO:0005654 | C | 247  | 1.11E-16 | 7.14E-15 |
| 5 | 1118 | F2 vs. L2 | - | Development | Development   | nucleus                                           | GO:0005634 | C | 4575 | 0.00E+00 | 0.00E+00 |

|   |      |           |   |             |               |                                                                   |            |   |      |          |          |
|---|------|-----------|---|-------------|---------------|-------------------------------------------------------------------|------------|---|------|----------|----------|
| 5 | 1119 | F2 vs. L2 | - | Development | Development   | organelle assembly                                                | GO:0070925 | P | 105  | 6.62E-10 | 5.13E-08 |
| 5 | 1120 | F2 vs. L2 | - | Development | Development   | organelle fission                                                 | GO:0048285 | P | 105  | 1.23E-06 | 4.02E-05 |
| 5 | 1121 | F2 vs. L2 | - | Development | Development   | organelle lumen                                                   | GO:0043233 | C | 749  | 0.00E+00 | 0.00E+00 |
| 5 | 1122 | F2 vs. L2 | - | Development | Development   | organelle organization                                            | GO:0006996 | P | 920  | 9.63E-12 | 9.37E-10 |
| 5 | 1123 | F2 vs. L2 | - | Development | Development   | pattern specification process                                     | GO:0007389 | P | 108  | 1.75E-03 | 1.86E-02 |
| 5 | 1124 | F2 vs. L2 | - | Development | Development   | phragmoplast                                                      | GO:0009524 | C | 40   | 2.43E-06 | 3.35E-05 |
| 5 | 1125 | F2 vs. L2 | - | Development | Development   | plant epidermis morphogenesis                                     | GO:0090626 | P | 53   | 3.09E-03 | 2.91E-02 |
| 5 | 1126 | F2 vs. L2 | - | Development | Development   | polymeric cytoskeletal fiber                                      | GO:0099513 | C | 95   | 8.93E-05 | 8.45E-04 |
| 5 | 1127 | F2 vs. L2 | - | Development | Development   | post-embryonic development                                        | GO:0009791 | P | 835  | 3.01E-03 | 2.86E-02 |
| 5 | 1128 | F2 vs. L2 | - | Development | Development   | post-embryonic plant morphogenesis                                | GO:0090698 | P | 98   | 5.33E-03 | 4.58E-02 |
| 5 | 1129 | F2 vs. L2 | - | Development | Development   | process utilizing autophagic mechanism                            | GO:0061919 | P | 28   | 3.63E-03 | 3.34E-02 |
| 5 | 1130 | F2 vs. L2 | - | Development | Development   | regionalization                                                   | GO:0003002 | P | 92   | 9.71E-04 | 1.11E-02 |
| 5 | 1131 | F2 vs. L2 | - | Development | Development   | reproductive structure development                                | GO:0048608 | P | 692  | 8.73E-04 | 1.03E-02 |
| 5 | 1132 | F2 vs. L2 | - | Development | Development   | reproductive system development                                   | GO:0061458 | P | 692  | 8.73E-04 | 1.03E-02 |
| 5 | 1133 | F2 vs. L2 | - | Development | Development   | seed development                                                  | GO:0048316 | P | 413  | 2.64E-04 | 3.87E-03 |
| 5 | 1134 | F2 vs. L2 | - | Development | Development   | structural molecule activity                                      | GO:0005198 | F | 267  | 1.95E-08 | 3.12E-06 |
| 5 | 1135 | F2 vs. L2 | - | Development | Development   | system development                                                | GO:0048731 | P | 1021 | 4.57E-03 | 4.05E-02 |
| 5 | 1136 | F2 vs. L2 | - | Development | Development   | tissue development                                                | GO:0009888 | P | 321  | 1.77E-03 | 1.86E-02 |
| 5 | 1137 | F2 vs. L2 | - | Metabolism  | Bioenergetics | ATPase activity                                                   | GO:0016887 | F | 318  | 1.78E-03 | 3.71E-02 |
| 5 | 1138 | F2 vs. L2 | - | Metabolism  | Bioenergetics | ATPase complex                                                    | GO:1904949 | C | 22   | 4.33E-05 | 4.59E-04 |
| 5 | 1139 | F2 vs. L2 | - | Metabolism  | Bioenergetics | DNA-dependent ATPase activity                                     | GO:0008094 | F | 66   | 1.15E-07 | 1.49E-05 |
| 5 | 1140 | F2 vs. L2 | - | Metabolism  | Bioenergetics | primary metabolic process                                         | GO:0044238 | P | 3754 | 1.06E-04 | 1.83E-03 |
| 5 | 1141 | F2 vs. L2 | - | Metabolism  | Catabolism    | autophagy                                                         | GO:0006914 | P | 28   | 3.63E-03 | 3.34E-02 |
| 5 | 1142 | F2 vs. L2 | - | Metabolism  | Catabolism    | cellular macromolecule catabolic process                          | GO:0044265 | P | 377  | 1.76E-03 | 1.86E-02 |
| 5 | 1143 | F2 vs. L2 | - | Metabolism  | Catabolism    | cellular protein catabolic process                                | GO:0044257 | P | 295  | 1.50E-03 | 1.64E-02 |
| 5 | 1144 | F2 vs. L2 | - | Metabolism  | Catabolism    | Cul4-RING E3 ubiquitin ligase complex                             | GO:0080008 | C | 87   | 1.87E-04 | 1.60E-03 |
| 5 | 1145 | F2 vs. L2 | - | Metabolism  | Catabolism    | cullin-RING ubiquitin ligase complex                              | GO:0031461 | C | 142  | 7.26E-07 | 1.11E-05 |
| 5 | 1146 | F2 vs. L2 | - | Metabolism  | Catabolism    | endopeptidase complex                                             | GO:1905369 | C | 49   | 4.36E-04 | 3.39E-03 |
| 5 | 1147 | F2 vs. L2 | - | Metabolism  | Catabolism    | exodeoxyribonuclease activity                                     | GO:0004529 | F | 10   | 7.14E-04 | 1.92E-02 |
| 5 | 1148 | F2 vs. L2 | - | Metabolism  | Catabolism    | exodeoxyribonuclease activity, producing 5'-phosphomonoesters     | GO:0016895 | F | 10   | 7.14E-04 | 1.94E-02 |
| 5 | 1149 | F2 vs. L2 | - | Metabolism  | Catabolism    | exonuclease activity                                              | GO:0004527 | F | 42   | 4.27E-04 | 1.25E-02 |
| 5 | 1150 | F2 vs. L2 | - | Metabolism  | Catabolism    | exoribonuclease complex                                           | GO:1905354 | C | 9    | 8.61E-03 | 4.20E-02 |
| 5 | 1151 | F2 vs. L2 | - | Metabolism  | Catabolism    | exosome (RNase complex)                                           | GO:0000178 | C | 9    | 8.61E-03 | 4.22E-02 |
| 5 | 1152 | F2 vs. L2 | - | Metabolism  | Catabolism    | modification-dependent macromolecule catabolic process            | GO:0043632 | P | 252  | 2.49E-05 | 5.36E-04 |
| 5 | 1153 | F2 vs. L2 | - | Metabolism  | Catabolism    | modification-dependent protein catabolic process                  | GO:0019941 | P | 248  | 4.45E-05 | 8.57E-04 |
| 5 | 1154 | F2 vs. L2 | - | Metabolism  | Catabolism    | peptidase complex                                                 | GO:1905368 | C | 58   | 2.55E-05 | 2.83E-04 |
| 5 | 1155 | F2 vs. L2 | - | Metabolism  | Catabolism    | phagophore assembly site                                          | GO:0000407 | C | 7    | 6.05E-03 | 3.19E-02 |
| 5 | 1156 | F2 vs. L2 | - | Metabolism  | Catabolism    | proteasomal protein catabolic process                             | GO:0010498 | P | 139  | 5.72E-05 | 1.08E-03 |
| 5 | 1157 | F2 vs. L2 | - | Metabolism  | Catabolism    | proteasome complex                                                | GO:0000502 | C | 45   | 2.79E-03 | 1.66E-02 |
| 5 | 1158 | F2 vs. L2 | - | Metabolism  | Catabolism    | proteasome core complex                                           | GO:0005839 | C | 20   | 1.00E-02 | 4.66E-02 |
| 5 | 1159 | F2 vs. L2 | - | Metabolism  | Catabolism    | proteasome-mediated ubiquitin-dependent protein catabolic process | GO:0043161 | P | 132  | 1.97E-04 | 3.02E-03 |
| 5 | 1160 | F2 vs. L2 | - | Metabolism  | Catabolism    | protein catabolic process                                         | GO:0030163 | P | 307  | 4.31E-03 | 3.86E-02 |
| 5 | 1161 | F2 vs. L2 | - | Metabolism  | Catabolism    | protein-containing complex                                        | GO:0032991 | C | 1661 | 0.00E+00 | 0.00E+00 |
| 5 | 1162 | F2 vs. L2 | - | Metabolism  | Catabolism    | proteolysis                                                       | GO:0006508 | P | 414  | 3.82E-03 | 3.49E-02 |
| 5 | 1163 | F2 vs. L2 | - | Metabolism  | Catabolism    | proteolysis involved in cellular protein catabolic process        | GO:0051603 | P | 286  | 7.87E-04 | 9.50E-03 |
| 5 | 1164 | F2 vs. L2 | - | Metabolism  | Catabolism    | RNA phosphodiester bond hydrolysis, endonucleolytic               | GO:0090502 | P | 13   | 1.88E-03 | 1.96E-02 |
| 5 | 1165 | F2 vs. L2 | - | Metabolism  | Catabolism    | ubiquitin ligase complex                                          | GO:0000151 | C | 174  | 1.14E-06 | 1.65E-05 |
| 5 | 1166 | F2 vs. L2 | - | Metabolism  | Catabolism    | ubiquitin-dependent protein catabolic process                     | GO:0006511 | P | 244  | 2.03E-05 | 4.58E-04 |
| 5 | 1167 | F2 vs. L2 | - | Metabolism  | Metabolism    | acetyltransferase complex                                         | GO:1902493 | C | 24   | 3.10E-03 | 1.81E-02 |
| 5 | 1168 | F2 vs. L2 | - | Metabolism  | Metabolism    | amide biosynthetic process                                        | GO:0043604 | P | 344  | 7.52E-07 | 2.81E-05 |
| 5 | 1169 | F2 vs. L2 | - | Metabolism  | Metabolism    | binding                                                           | GO:0005488 | F | 5021 | 6.00E-04 | 1.70E-02 |
| 5 | 1170 | F2 vs. L2 | - | Metabolism  | Metabolism    | catalytic activity, acting on DNA                                 | GO:0140097 | F | 102  | 4.88E-11 | 1.33E-08 |
| 5 | 1171 | F2 vs. L2 | - | Metabolism  | Metabolism    | catalytic complex                                                 | GO:1902494 | C | 638  | 8.88E-16 | 3.43E-14 |
| 5 | 1172 | F2 vs. L2 | - | Metabolism  | Metabolism    | cellular amide metabolic process                                  | GO:0043603 | P | 419  | 4.60E-04 | 5.95E-03 |
| 5 | 1173 | F2 vs. L2 | - | Metabolism  | Metabolism    | cellular aromatic compound metabolic process                      | GO:0006725 | P | 1339 | 1.33E-15 | 2.97E-13 |
| 5 | 1174 | F2 vs. L2 | - | Metabolism  | Metabolism    | cellular macromolecule biosynthetic process                       | GO:0034645 | P | 688  | 7.37E-14 | 1.04E-11 |
| 5 | 1175 | F2 vs. L2 | - | Metabolism  | Metabolism    | cellular macromolecule metabolic process                          | GO:0044260 | P | 2207 | 0.00E+00 | 0.00E+00 |
| 5 | 1176 | F2 vs. L2 | - | Metabolism  | Metabolism    | cellular nitrogen compound biosynthetic process                   | GO:0044271 | P | 691  | 3.29E-04 | 4.57E-03 |
| 5 | 1177 | F2 vs. L2 | - | Metabolism  | Metabolism    | cellular nitrogen compound metabolic process                      | GO:0034641 | P | 1546 | 0.00E+00 | 0.00E+00 |
| 5 | 1178 | F2 vs. L2 | - | Metabolism  | Metabolism    | cellular protein metabolic process                                | GO:0044267 | P | 1675 | 2.06E-10 | 1.72E-08 |
| 5 | 1179 | F2 vs. L2 | - | Metabolism  | Metabolism    | cellular protein modification process                             | GO:0006464 | P | 1182 | 4.33E-06 | 1.21E-04 |
| 5 | 1180 | F2 vs. L2 | - | Metabolism  | Metabolism    | cellular protein-containing complex assembly                      | GO:0034622 | P | 279  | 4.29E-05 | 8.37E-04 |



|   |      |           |   |            |                      |                                                                         |            |   |      |          |          |
|---|------|-----------|---|------------|----------------------|-------------------------------------------------------------------------|------------|---|------|----------|----------|
| 5 | 1181 | F2 vs. L2 | - | Metabolism | Metabolism           | chromatin binding                                                       | GO:0003682 | F | 81   | 1.10E-04 | 4.15E-03 |
| 5 | 1182 | F2 vs. L2 | - | Metabolism | Metabolism           | deoxyribonuclease activity                                              | GO:0004536 | F | 19   | 3.12E-05 | 1.52E-03 |
| 5 | 1183 | F2 vs. L2 | - | Metabolism | Metabolism           | DNA binding                                                             | GO:0003677 | F | 712  | 2.72E-07 | 2.85E-05 |
| 5 | 1184 | F2 vs. L2 | - | Metabolism | Metabolism           | DNA metabolic process                                                   | GO:0006259 | P | 220  | 0.00E+00 | 0.00E+00 |
| 5 | 1185 | F2 vs. L2 | - | Metabolism | Metabolism           | DNA secondary structure binding                                         | GO:0000217 | F | 22   | 7.81E-05 | 3.08E-03 |
| 5 | 1186 | F2 vs. L2 | - | Metabolism | Metabolism           | heterocycle metabolic process                                           | GO:0046483 | P | 1270 | 0.00E+00 | 0.00E+00 |
| 5 | 1187 | F2 vs. L2 | - | Metabolism | Metabolism           | heterocyclic compound binding                                           | GO:1901363 | F | 2372 | 2.26E-05 | 1.18E-03 |
| 5 | 1188 | F2 vs. L2 | - | Metabolism | Metabolism           | macromolecule biosynthetic process                                      | GO:0009059 | P | 722  | 1.19E-11 | 1.14E-09 |
| 5 | 1189 | F2 vs. L2 | - | Metabolism | Metabolism           | macromolecule metabolic process                                         | GO:0043170 | P | 2776 | 0.00E+00 | 0.00E+00 |
| 5 | 1190 | F2 vs. L2 | - | Metabolism | Metabolism           | microtubule binding                                                     | GO:0008017 | F | 83   | 4.16E-07 | 3.90E-05 |
| 5 | 1191 | F2 vs. L2 | - | Metabolism | Metabolism           | motor activity                                                          | GO:0003774 | F | 44   | 1.18E-03 | 2.72E-02 |
| 5 | 1192 | F2 vs. L2 | - | Metabolism | Metabolism           | nitrogen compound metabolic process                                     | GO:0006807 | P | 3160 | 3.56E-12 | 3.97E-10 |
| 5 | 1193 | F2 vs. L2 | - | Metabolism | Metabolism           | nucleic acid binding                                                    | GO:0003676 | F | 1637 | 4.95E-14 | 2.69E-11 |
| 5 | 1194 | F2 vs. L2 | - | Metabolism | Metabolism           | organic cyclic compound binding                                         | GO:0097159 | F | 2384 | 1.40E-05 | 7.93E-04 |
| 5 | 1195 | F2 vs. L2 | - | Metabolism | Metabolism           | organic cyclic compound metabolic process                               | GO:1901360 | P | 1398 | 8.55E-15 | 1.58E-12 |
| 5 | 1196 | F2 vs. L2 | - | Metabolism | Metabolism           | peptide metabolic process                                               | GO:0006518 | P | 340  | 6.33E-07 | 2.39E-05 |
| 5 | 1197 | F2 vs. L2 | - | Metabolism | Metabolism           | protein binding                                                         | GO:0005515 | F | 2895 | 1.10E-04 | 4.11E-03 |
| 5 | 1198 | F2 vs. L2 | - | Metabolism | Metabolism           | protein metabolic process                                               | GO:0019538 | P | 1763 | 1.40E-09 | 9.58E-08 |
| 5 | 1199 | F2 vs. L2 | - | Metabolism | Metabolism           | Sm-like protein family complex                                          | GO:0120114 | C | 44   | 1.28E-08 | 2.57E-07 |
| 5 | 1200 | F2 vs. L2 | - | Metabolism | Metabolism           | supramolecular complex                                                  | GO:0099080 | C | 146  | 7.88E-07 | 1.19E-05 |
| 5 | 1201 | F2 vs. L2 | - | Metabolism | Metabolism           | supramolecular fiber                                                    | GO:0099512 | C | 95   | 8.93E-05 | 8.37E-04 |
| 5 | 1202 | F2 vs. L2 | - | Metabolism | Metabolism           | supramolecular polymer                                                  | GO:0099081 | C | 95   | 8.93E-05 | 8.53E-04 |
| 5 | 1203 | F2 vs. L2 | - | Metabolism | Metabolism           | transferase complex                                                     | GO:1990234 | C | 369  | 1.11E-16 | 5.64E-15 |
|   |      |           |   |            |                      |                                                                         |            |   |      |          |          |
| 5 | 1204 | F2 vs. L2 | - | Metabolism | Metabolism           | transferase complex, transferring phosphorus-containing groups          | GO:0061695 | C | 115  | 7.51E-12 | 2.42E-10 |
| 5 | 1205 | F2 vs. L2 | - | Metabolism | Metabolism           | tubulin binding                                                         | GO:0015631 | F | 87   | 1.80E-07 | 2.13E-05 |
| 5 | 1206 | F2 vs. L2 | - | Metabolism | Transporters         | kinesin complex                                                         | GO:0005871 | C | 22   | 8.02E-05 | 7.98E-04 |
| 5 | 1207 | F2 vs. L2 | - | Metabolism | Transporters         | nuclear export                                                          | GO:0051168 | P | 39   | 7.32E-04 | 8.93E-03 |
| 5 | 1208 | F2 vs. L2 | - | Metabolism | Transporters         | nuclear microtubule                                                     | GO:0005880 | C | 5    | 6.93E-03 | 3.52E-02 |
| 5 | 1209 | F2 vs. L2 | - | Metabolism | Transporters         | nuclear transport                                                       | GO:0051169 | P | 64   | 8.66E-05 | 1.54E-03 |
| 5 | 1210 | F2 vs. L2 | - | Metabolism | Transporters         | nucleic acid transport                                                  | GO:0050657 | P | 41   | 7.24E-04 | 8.84E-03 |
| 5 | 1211 | F2 vs. L2 | - | Metabolism | Transporters         | nucleocytoplasmic transport                                             | GO:0006913 | P | 64   | 8.66E-05 | 1.53E-03 |
| 5 | 1212 | F2 vs. L2 | - | Metabolism | Transporters         | protein export from nucleus                                             | GO:0006611 | P | 33   | 9.46E-04 | 1.09E-02 |
| 5 | 1213 | F2 vs. L2 | - | Metabolism | Transporters         | RNA transport                                                           | GO:0050658 | P | 41   | 7.24E-04 | 8.86E-03 |
| 5 | 1214 | F2 vs. L2 | - | Regulation | Protein modification | lipoprotein metabolic process                                           | GO:0042157 | P | 36   | 4.04E-03 | 3.66E-02 |
| 5 | 1215 | F2 vs. L2 | - | Regulation | Protein modification | methylation                                                             | GO:0032259 | P | 110  | 3.31E-05 | 6.85E-04 |
| 5 | 1216 | F2 vs. L2 | - | Regulation | Protein modification | protein alkylation                                                      | GO:0008213 | P | 45   | 2.82E-04 | 4.07E-03 |
| 5 | 1217 | F2 vs. L2 | - | Regulation | Protein modification | protein dealkylation                                                    | GO:0008214 | P | 8    | 1.70E-03 | 1.80E-02 |
| 5 | 1218 | F2 vs. L2 | - | Regulation | Protein modification | protein heterodimerization activity                                     | GO:0046982 | F | 68   | 5.84E-05 | 2.45E-03 |
| 5 | 1219 | F2 vs. L2 | - | Regulation | Protein modification | protein methylation                                                     | GO:0006479 | P | 45   | 2.82E-04 | 4.09E-03 |
| 5 | 1220 | F2 vs. L2 | - | Regulation | Protein modification | regulation of protein metabolic process                                 | GO:0051246 | P | 186  | 1.22E-04 | 2.04E-03 |
| 5 | 1221 | F2 vs. L2 | - | Regulation | Protein modification | peptidyl-amino acid modification                                        | GO:0018193 | P | 190  | 4.15E-03 | 3.73E-02 |
| 5 | 1222 | F2 vs. L2 | - | Regulation | Protein modification | peptidyl-lysine modification                                            | GO:0018205 | P | 68   | 8.17E-04 | 9.81E-03 |
| 5 | 1223 | F2 vs. L2 | - | Regulation | Protein modification | positive regulation of protein modification process                     | GO:0031401 | P | 31   | 1.35E-04 | 2.24E-03 |
| 5 | 1224 | F2 vs. L2 | - | Regulation | Protein modification | protein modification by small protein conjugation or removal            | GO:0070647 | P | 351  | 8.82E-04 | 1.04E-02 |
| 5 | 1225 | F2 vs. L2 | - | Regulation | Protein modification | protein modification process                                            | GO:0036211 | P | 1182 | 4.33E-06 | 1.21E-04 |
| 5 | 1226 | F2 vs. L2 | - | Regulation | Protein modification | protein-containing complex assembly                                     | GO:0065003 | P | 317  | 2.17E-04 | 3.30E-03 |
| 5 | 1227 | F2 vs. L2 | - | Regulation | Protein modification | protein-containing complex localization                                 | GO:0031503 | P | 39   | 9.77E-04 | 1.12E-02 |
| 5 | 1228 | F2 vs. L2 | - | Regulation | Protein modification | protein-containing complex subunit organization                         | GO:0043933 | P | 356  | 9.25E-04 | 1.08E-02 |
| 5 | 1229 | F2 vs. L2 | - | Regulation | Protein modification | regulation of protein modification process                              | GO:0031399 | P | 94   | 3.66E-05 | 7.39E-04 |
| 5 | 1230 | F2 vs. L2 | - | Regulation | Regulation           | negative regulation of biological process                               | GO:0048519 | P | 600  | 2.05E-06 | 6.35E-05 |
| 5 | 1231 | F2 vs. L2 | - | Regulation | Regulation           | negative regulation of biosynthetic process                             | GO:0009890 | P | 178  | 1.49E-05 | 3.46E-04 |
| 5 | 1232 | F2 vs. L2 | - | Regulation | Regulation           | negative regulation of cellular biosynthetic process                    | GO:0031327 | P | 174  | 1.23E-05 | 2.93E-04 |
|   |      |           |   |            |                      |                                                                         |            |   |      |          |          |
| 5 | 1233 | F2 vs. L2 | - | Regulation | Regulation           | negative regulation of cellular macromolecule biosynthetic process      | GO:2000113 | P | 164  | 4.69E-06 | 1.29E-04 |
| 5 | 1234 | F2 vs. L2 | - | Regulation | Regulation           | negative regulation of cellular metabolic process                       | GO:0031324 | P | 233  | 3.40E-05 | 6.92E-04 |
| 5 | 1235 | F2 vs. L2 | - | Regulation | Regulation           | negative regulation of cellular process                                 | GO:0048523 | P | 395  | 2.62E-05 | 5.57E-04 |
| 5 | 1236 | F2 vs. L2 | - | Regulation | Regulation           | negative regulation of macromolecule biosynthetic process               | GO:0010558 | P | 165  | 3.42E-06 | 9.63E-05 |
| 5 | 1237 | F2 vs. L2 | - | Regulation | Regulation           | negative regulation of macromolecule metabolic process                  | GO:0010605 | P | 305  | 3.67E-12 | 4.01E-10 |
| 5 | 1238 | F2 vs. L2 | - | Regulation | Regulation           | negative regulation of metabolic process                                | GO:0009892 | P | 336  | 5.81E-10 | 4.64E-08 |
| 5 | 1239 | F2 vs. L2 | - | Regulation | Regulation           | negative regulation of nitrogen compound metabolic process              | GO:0051172 | P | 200  | 2.63E-07 | 1.06E-05 |
|   |      |           |   |            |                      |                                                                         |            |   |      |          |          |
| 5 | 1240 | F2 vs. L2 | - | Regulation | Regulation           | negative regulation of nucleobase-containing compound metabolic process | GO:0045934 | P | 155  | 7.87E-07 | 2.93E-05 |
| 5 | 1241 | F2 vs. L2 | - | Regulation | Regulation           | positive regulation of macromolecule metabolic process                  | GO:0010604 | P | 351  | 3.31E-03 | 3.08E-02 |



|   |      |           |   |            |               |                                                                          |            |   |      |          |          |
|---|------|-----------|---|------------|---------------|--------------------------------------------------------------------------|------------|---|------|----------|----------|
| 5 | 1242 | F2 vs. L2 | - | Regulation | Regulation    | regulation of biological process                                         | GO:0050789 | P | 2539 | 3.12E-04 | 4.40E-03 |
| 5 | 1243 | F2 vs. L2 | - | Regulation | Regulation    | regulation of biosynthetic process                                       | GO:0009889 | P | 1100 | 3.39E-04 | 4.65E-03 |
| 5 | 1244 | F2 vs. L2 | - | Regulation | Regulation    | regulation of cell shape                                                 | GO:0008360 | P | 12   | 5.73E-03 | 4.82E-02 |
| 5 | 1245 | F2 vs. L2 | - | Regulation | Regulation    | regulation of cellular biosynthetic process                              | GO:0031326 | P | 1079 | 1.07E-04 | 1.84E-03 |
| 5 | 1246 | F2 vs. L2 | - | Regulation | Regulation    | regulation of cellular macromolecule biosynthetic process                | GO:2000112 | P | 1021 | 8.21E-07 | 3.03E-05 |
| 5 | 1247 | F2 vs. L2 | - | Regulation | Regulation    | regulation of cellular metabolic process                                 | GO:0031323 | P | 1344 | 2.20E-05 | 4.89E-04 |
| 5 | 1248 | F2 vs. L2 | - | Regulation | Regulation    | regulation of cellular process                                           | GO:0050794 | P | 2218 | 1.38E-03 | 1.54E-02 |
| 5 | 1249 | F2 vs. L2 | - | Regulation | Regulation    | regulation of cellular protein metabolic process                         | GO:0032268 | P | 175  | 1.46E-04 | 2.38E-03 |
| 5 | 1250 | F2 vs. L2 | - | Regulation | Regulation    | regulation of macromolecule biosynthetic process                         | GO:0010556 | P | 1029 | 9.28E-07 | 3.38E-05 |
| 5 | 1251 | F2 vs. L2 | - | Regulation | Regulation    | regulation of macromolecule metabolic process                            | GO:0060255 | P | 1366 | 6.17E-12 | 6.60E-10 |
| 5 | 1252 | F2 vs. L2 | - | Regulation | Regulation    | regulation of meristem structural organization                           | GO:0009934 | P | 17   | 2.77E-04 | 4.02E-03 |
| 5 | 1253 | F2 vs. L2 | - | Regulation | Regulation    | regulation of metabolic process                                          | GO:0019222 | P | 1523 | 2.10E-07 | 8.64E-06 |
| 5 | 1254 | F2 vs. L2 | - | Regulation | Regulation    | regulation of nitrogen compound metabolic process                        | GO:0051171 | P | 1202 | 1.41E-07 | 6.24E-06 |
| 5 | 1255 | F2 vs. L2 | - | Regulation | Regulation    | regulation of nucleobase-containing compound metabolic process           | GO:0019219 | P | 1021 | 2.08E-06 | 6.34E-05 |
| 5 | 1256 | F2 vs. L2 | - | Regulation | Regulation    | regulation of organelle organization                                     | GO:0033043 | P | 109  | 1.20E-05 | 2.87E-04 |
| 5 | 1257 | F2 vs. L2 | - | Regulation | Regulation    | regulation of primary metabolic process                                  | GO:0080090 | P | 1251 | 2.59E-06 | 7.73E-05 |
| 5 | 1258 | F2 vs. L2 | - | Regulation | Regulation    | regulation of transferase activity                                       | GO:0051338 | P | 51   | 6.51E-05 | 1.20E-03 |
| 5 | 1259 | F2 vs. L2 | - | Regulation | Transcription | ATP-dependent chromatin remodeling                                       | GO:0043044 | P | 14   | 1.92E-03 | 1.99E-02 |
| 5 | 1260 | F2 vs. L2 | - | Regulation | Transcription | chromatin organization involved in negative regulation of transcription  | GO:0097549 | P | 38   | 3.32E-05 | 6.81E-04 |
| 5 | 1261 | F2 vs. L2 | - | Regulation | Transcription | chromatin organization involved in regulation of transcription           | GO:0034401 | P | 39   | 6.04E-05 | 1.12E-03 |
| 5 | 1262 | F2 vs. L2 | - | Regulation | Transcription | chromatin remodeling                                                     | GO:0006338 | P | 49   | 2.57E-05 | 5.49E-04 |
| 5 | 1263 | F2 vs. L2 | - | Regulation | Transcription | chromatin silencing                                                      | GO:0006342 | P | 23   | 2.18E-04 | 3.31E-03 |
| 5 | 1264 | F2 vs. L2 | - | Regulation | Transcription | covalent chromatin modification                                          | GO:0016569 | P | 88   | 4.52E-09 | 2.75E-07 |
| 5 | 1265 | F2 vs. L2 | - | Regulation | Transcription | demethylation                                                            | GO:0070988 | P | 16   | 1.59E-03 | 1.71E-02 |
| 5 | 1266 | F2 vs. L2 | - | Regulation | Transcription | DNA conformation change                                                  | GO:0071103 | P | 82   | 6.28E-06 | 1.66E-04 |
| 5 | 1267 | F2 vs. L2 | - | Regulation | Transcription | DNA geometric change                                                     | GO:0032392 | P | 23   | 4.14E-04 | 5.45E-03 |
| 5 | 1268 | F2 vs. L2 | - | Regulation | Transcription | DNA-binding transcription activator activity, RNA polymerase II-specific | GO:0001228 | F | 13   | 1.99E-03 | 3.97E-02 |
| 5 | 1269 | F2 vs. L2 | - | Regulation | Transcription | DNA-directed RNA polymerase complex                                      | GO:0000428 | C | 60   | 1.46E-05 | 1.78E-04 |
| 5 | 1270 | F2 vs. L2 | - | Regulation | Transcription | dsRNA processing                                                         | GO:0031050 | P | 38   | 2.03E-07 | 8.57E-06 |
| 5 | 1271 | F2 vs. L2 | - | Regulation | Transcription | gene expression                                                          | GO:0010467 | P | 870  | 0.00E+00 | 0.00E+00 |
| 5 | 1272 | F2 vs. L2 | - | Regulation | Transcription | gene silencing                                                           | GO:0016458 | P | 91   | 1.00E-09 | 7.25E-08 |
| 5 | 1273 | F2 vs. L2 | - | Regulation | Transcription | gene silencing by miRNA                                                  | GO:0035195 | P | 23   | 4.75E-04 | 6.11E-03 |
| 5 | 1274 | F2 vs. L2 | - | Regulation | Transcription | gene silencing by RNA                                                    | GO:0031047 | P | 62   | 4.81E-08 | 2.28E-06 |
| 5 | 1275 | F2 vs. L2 | - | Regulation | Transcription | helicase activity                                                        | GO:0004386 | F | 83   | 5.82E-07 | 5.27E-05 |
| 5 | 1276 | F2 vs. L2 | - | Regulation | Transcription | histone binding                                                          | GO:0042393 | F | 49   | 3.83E-07 | 3.72E-05 |
| 5 | 1277 | F2 vs. L2 | - | Regulation | Transcription | histone deacetylase complex                                              | GO:0000118 | C | 15   | 8.90E-03 | 4.29E-02 |
| 5 | 1278 | F2 vs. L2 | - | Regulation | Transcription | histone demethylation                                                    | GO:0016577 | P | 7    | 3.27E-03 | 3.06E-02 |
| 5 | 1279 | F2 vs. L2 | - | Regulation | Transcription | histone lysine demethylation                                             | GO:0070076 | P | 7    | 3.27E-03 | 3.06E-02 |
| 5 | 1280 | F2 vs. L2 | - | Regulation | Transcription | histone lysine methylation                                               | GO:0034968 | P | 27   | 9.84E-04 | 1.13E-02 |
| 5 | 1281 | F2 vs. L2 | - | Regulation | Transcription | histone methylation                                                      | GO:0016571 | P | 34   | 9.97E-05 | 1.74E-03 |
| 5 | 1282 | F2 vs. L2 | - | Regulation | Transcription | histone methyltransferase activity                                       | GO:0042054 | F | 24   | 7.53E-04 | 1.99E-02 |
| 5 | 1283 | F2 vs. L2 | - | Regulation | Transcription | histone modification                                                     | GO:0016570 | P | 85   | 8.17E-09 | 4.51E-07 |
| 5 | 1284 | F2 vs. L2 | - | Regulation | Transcription | Ino80 complex                                                            | GO:0031011 | C | 9    | 1.46E-03 | 1.02E-02 |
| 5 | 1285 | F2 vs. L2 | - | Regulation | Transcription | INO80-type complex                                                       | GO:0097346 | C | 10   | 2.29E-03 | 1.46E-02 |
| 5 | 1286 | F2 vs. L2 | - | Regulation | Transcription | macromolecule deacylation                                                | GO:0098732 | P | 12   | 5.58E-03 | 4.71E-02 |
| 5 | 1287 | F2 vs. L2 | - | Regulation | Transcription | macromolecule methylation                                                | GO:0043414 | P | 86   | 6.54E-09 | 3.81E-07 |
| 5 | 1288 | F2 vs. L2 | - | Regulation | Transcription | macromolecule modification                                               | GO:0043412 | P | 1339 | 6.87E-12 | 6.93E-10 |
| 5 | 1289 | F2 vs. L2 | - | Regulation | Transcription | mediator complex                                                         | GO:0016592 | C | 30   | 7.91E-04 | 5.83E-03 |
| 5 | 1290 | F2 vs. L2 | - | Regulation | Transcription | methylated histone binding                                               | GO:0035064 | F | 10   | 8.82E-04 | 2.24E-02 |
| 5 | 1291 | F2 vs. L2 | - | Regulation | Transcription | methylation-dependent protein binding                                    | GO:0140034 | F | 10   | 8.82E-04 | 2.26E-02 |
| 5 | 1292 | F2 vs. L2 | - | Regulation | Transcription | methyltransferase complex                                                | GO:0034708 | C | 17   | 6.84E-03 | 3.51E-02 |
| 5 | 1293 | F2 vs. L2 | - | Regulation | Transcription | minor groove of adenine-thymine-rich DNA binding                         | GO:0003680 | F | 17   | 1.46E-04 | 5.10E-03 |
| 5 | 1294 | F2 vs. L2 | - | Regulation | Transcription | mRNA processing                                                          | GO:0006397 | P | 163  | 4.55E-15 | 9.02E-13 |
| 5 | 1295 | F2 vs. L2 | - | Regulation | Transcription | negative regulation of gene expression                                   | GO:0010629 | P | 252  | 7.63E-10 | 5.83E-08 |
| 5 | 1296 | F2 vs. L2 | - | Regulation | Transcription | negative regulation of gene expression, epigenetic                       | GO:0045814 | P | 26   | 4.97E-05 | 9.54E-04 |
| 5 | 1297 | F2 vs. L2 | - | Regulation | Transcription | negative regulation of nucleic acid-templated transcription              | GO:1903507 | P | 132  | 3.78E-05 | 7.51E-04 |
| 5 | 1298 | F2 vs. L2 | - | Regulation | Transcription | negative regulation of RNA biosynthetic process                          | GO:1902679 | P | 132  | 3.78E-05 | 7.54E-04 |
| 5 | 1299 | F2 vs. L2 | - | Regulation | Transcription | negative regulation of transcription, DNA-templated                      | GO:0045892 | P | 131  | 5.19E-05 | 9.89E-04 |
| 5 | 1300 | F2 vs. L2 | - | Regulation | Transcription | nuclear DNA-directed RNA polymerase complex                              | GO:0055029 | C | 52   | 1.08E-06 | 1.58E-05 |
| 5 | 1301 | F2 vs. L2 | - | Regulation | Transcription | nuclear speck                                                            | GO:0016607 | C | 46   | 1.49E-04 | 1.32E-03 |
| 5 | 1302 | F2 vs. L2 | - | Regulation | Transcription | nucleic acid-templated transcription                                     | GO:0097659 | P | 114  | 1.63E-04 | 2.58E-03 |

|   |      |           |   |            |               |                                                                                          |            |   |      |          |          |
|---|------|-----------|---|------------|---------------|------------------------------------------------------------------------------------------|------------|---|------|----------|----------|
| 5 | 1303 | F2 vs. L2 | - | Regulation | Transcription | nucleolus                                                                                | GO:0005730 | C | 298  | 1.11E-16 | 5.95E-15 |
| 5 | 1304 | F2 vs. L2 | - | Regulation | Transcription | nucleosome organization                                                                  | GO:0034728 | P | 33   | 7.09E-04 | 8.72E-03 |
| 5 | 1305 | F2 vs. L2 | - | Regulation | Transcription | peptidyl-lysine methylation                                                              | GO:0018022 | P | 32   | 2.75E-03 | 2.71E-02 |
| 5 | 1306 | F2 vs. L2 | - | Regulation | Transcription | positive regulation of chromatin organization                                            | GO:1905269 | P | 10   | 4.56E-03 | 4.05E-02 |
| 5 | 1307 | F2 vs. L2 | - | Regulation | Transcription | positive regulation of chromosome organization                                           | GO:2001252 | P | 12   | 2.61E-03 | 2.58E-02 |
| 5 | 1308 | F2 vs. L2 | - | Regulation | Transcription | positive regulation of RNA interference                                                  | GO:1900370 | P | 4    | 5.87E-03 | 4.91E-02 |
| 5 | 1309 | F2 vs. L2 | - | Regulation | Transcription | post-transcriptional gene silencing by RNA                                               | GO:0035194 | P | 45   | 1.18E-06 | 3.94E-05 |
| 5 | 1310 | F2 vs. L2 | - | Regulation | Transcription | production of siRNA involved in RNA interference                                         | GO:0030422 | P | 23   | 9.81E-05 | 1.72E-03 |
| 5 | 1311 | F2 vs. L2 | - | Regulation | Transcription | production of small RNA involved in gene silencing by RNA                                | GO:0070918 | P | 38   | 2.03E-07 | 8.51E-06 |
| 5 | 1312 | F2 vs. L2 | - | Regulation | Transcription | protein acetylation                                                                      | GO:0006473 | P | 29   | 3.05E-04 | 4.35E-03 |
| 5 | 1313 | F2 vs. L2 | - | Regulation | Transcription | protein acetyltransferase complex                                                        | GO:0031248 | C | 24   | 3.10E-03 | 1.80E-02 |
| 5 | 1314 | F2 vs. L2 | - | Regulation | Transcription | protein acylation                                                                        | GO:0043543 | P | 42   | 1.02E-03 | 1.16E-02 |
| 5 | 1315 | F2 vs. L2 | - | Regulation | Transcription | protein deacylation                                                                      | GO:0035601 | P | 12   | 5.58E-03 | 4.71E-02 |
| 5 | 1316 | F2 vs. L2 | - | Regulation | Transcription | protein demethylation                                                                    | GO:0006482 | P | 8    | 1.70E-03 | 1.80E-02 |
| 5 | 1317 | F2 vs. L2 | - | Regulation | Transcription | protein-DNA complex                                                                      | GO:0032993 | C | 37   | 1.42E-06 | 2.01E-05 |
| 5 | 1318 | F2 vs. L2 | - | Regulation | Transcription | protein-DNA complex assembly                                                             | GO:0065004 | P | 43   | 5.06E-05 | 9.66E-04 |
| 5 | 1319 | F2 vs. L2 | - | Regulation | Transcription | protein-DNA complex subunit organization                                                 | GO:0071824 | P | 51   | 2.99E-05 | 6.27E-04 |
| 5 | 1320 | F2 vs. L2 | - | Regulation | Transcription | regulation of gene expression                                                            | GO:0010468 | P | 1194 | 1.07E-09 | 7.66E-08 |
| 5 | 1321 | F2 vs. L2 | - | Regulation | Transcription | regulation of gene expression, epigenetic                                                | GO:0040029 | P | 51   | 1.26E-05 | 2.98E-04 |
| 5 | 1322 | F2 vs. L2 | - | Regulation | Transcription | regulation of gene silencing                                                             | GO:0060968 | P | 33   | 1.82E-04 | 2.82E-03 |
| 5 | 1323 | F2 vs. L2 | - | Regulation | Transcription | regulation of gene silencing by RNA                                                      | GO:0060966 | P | 11   | 5.66E-04 | 7.14E-03 |
| 5 | 1324 | F2 vs. L2 | - | Regulation | Transcription | regulation of nucleic acid-templated transcription                                       | GO:1903506 | P | 930  | 3.11E-05 | 6.48E-04 |
| 5 | 1325 | F2 vs. L2 | - | Regulation | Transcription | regulation of RNA biosynthetic process                                                   | GO:2001141 | P | 932  | 4.29E-05 | 8.34E-04 |
| 5 | 1326 | F2 vs. L2 | - | Regulation | Transcription | regulation of RNA interference                                                           | GO:1900368 | P | 5    | 2.59E-03 | 2.57E-02 |
| 5 | 1327 | F2 vs. L2 | - | Regulation | Transcription | regulation of transcription by RNA polymerase II                                         | GO:0006357 | P | 220  | 5.42E-04 | 6.92E-03 |
| 5 | 1328 | F2 vs. L2 | - | Regulation | Transcription | regulation of transcription, DNA-templated                                               | GO:0006355 | P | 930  | 3.11E-05 | 6.51E-04 |
| 5 | 1329 | F2 vs. L2 | - | Regulation | Transcription | RNA 3'-end processing                                                                    | GO:0031123 | P | 34   | 5.39E-05 | 1.02E-03 |
| 5 | 1330 | F2 vs. L2 | - | Regulation | Transcription | RNA binding                                                                              | GO:0003723 | F | 895  | 1.91E-07 | 2.16E-05 |
| 5 | 1331 | F2 vs. L2 | - | Regulation | Transcription | RNA biosynthetic process                                                                 | GO:0032774 | P | 116  | 6.90E-05 | 1.26E-03 |
| 5 | 1332 | F2 vs. L2 | - | Regulation | Transcription | RNA methylation                                                                          | GO:0001510 | P | 35   | 1.95E-05 | 4.46E-04 |
| 5 | 1333 | F2 vs. L2 | - | Regulation | Transcription | RNA modification                                                                         | GO:0009451 | P | 144  | 4.91E-14 | 7.29E-12 |
| 5 | 1334 | F2 vs. L2 | - | Regulation | Transcription | RNA polymerase complex                                                                   | GO:0030880 | C | 63   | 2.13E-05 | 2.45E-04 |
| 5 | 1335 | F2 vs. L2 | - | Regulation | Transcription | RNA polymerase II CTD heptapeptide repeat phosphatase activity                           | GO:0008420 | F | 5    | 2.33E-03 | 4.46E-02 |
| 5 | 1336 | F2 vs. L2 | - | Regulation | Transcription | RNA polymerase II, core complex                                                          | GO:0005665 | C | 11   | 3.60E-03 | 2.07E-02 |
| 5 | 1337 | F2 vs. L2 | - | Regulation | Transcription | RNA polymerase II, holoenzyme                                                            | GO:0016591 | C | 35   | 2.61E-04 | 2.17E-03 |
| 5 | 1338 | F2 vs. L2 | - | Regulation | Transcription | RNA polymerase IV complex                                                                | GO:0000418 | C | 6    | 2.93E-03 | 1.72E-02 |
| 5 | 1339 | F2 vs. L2 | - | Regulation | Transcription | RNA polymerase V complex                                                                 | GO:0000419 | C | 10   | 1.09E-04 | 1.01E-03 |
| 5 | 1340 | F2 vs. L2 | - | Regulation | Transcription | SWI/SNF superfamily-type complex                                                         | GO:0070603 | C | 18   | 4.45E-04 | 3.43E-03 |
| 5 | 1341 | F2 vs. L2 | - | Regulation | Transcription | THO complex                                                                              | GO:0000347 | C | 10   | 1.28E-03 | 9.10E-03 |
| 5 | 1342 | F2 vs. L2 | - | Regulation | Transcription | transcription coregulator activity                                                       | GO:0003712 | F | 79   | 5.08E-08 | 7.27E-06 |
| 5 | 1343 | F2 vs. L2 | - | Regulation | Transcription | transcription corepressor activity                                                       | GO:0003714 | F | 12   | 1.34E-03 | 2.97E-02 |
| 5 | 1344 | F2 vs. L2 | - | Regulation | Transcription | transcription regulator complex                                                          | GO:0005667 | C | 59   | 2.00E-03 | 1.31E-02 |
| 5 | 1345 | F2 vs. L2 | - | Regulation | Transcription | transcription, DNA-templated                                                             | GO:0006351 | P | 114  | 1.63E-04 | 2.57E-03 |
| 5 | 1346 | F2 vs. L2 | - | Regulation | Translation   | 90S preribosome                                                                          | GO:0030686 | C | 15   | 2.69E-03 | 1.64E-02 |
| 5 | 1347 | F2 vs. L2 | - | Regulation | Translation   | box C/D snoRNP complex                                                                   | GO:0031428 | C | 8    | 2.54E-03 | 1.60E-02 |
| 5 | 1348 | F2 vs. L2 | - | Regulation | Translation   | catalytic activity, acting on a tRNA                                                     | GO:0140101 | F | 70   | 9.24E-06 | 5.71E-04 |
| 5 | 1349 | F2 vs. L2 | - | Regulation | Translation   | catalytic activity, acting on RNA                                                        | GO:0140098 | F | 227  | 2.95E-12 | 1.15E-09 |
| 5 | 1350 | F2 vs. L2 | - | Regulation | Translation   | catalytic step 2 spliceosome                                                             | GO:0071013 | C | 32   | 1.95E-05 | 2.26E-04 |
| 5 | 1351 | F2 vs. L2 | - | Regulation | Translation   | cytoplasmic exosome (RNase complex)                                                      | GO:0000177 | C | 6    | 1.00E-02 | 4.67E-02 |
| 5 | 1352 | F2 vs. L2 | - | Regulation | Translation   | cytosolic large ribosomal subunit                                                        | GO:0022625 | C | 92   | 1.28E-07 | 2.10E-06 |
| 5 | 1353 | F2 vs. L2 | - | Regulation | Translation   | cytosolic ribosome                                                                       | GO:0022626 | C | 212  | 2.28E-05 | 2.56E-04 |
| 5 | 1354 | F2 vs. L2 | - | Regulation | Translation   | cytosolic small ribosomal subunit                                                        | GO:0022627 | C | 73   | 5.52E-06 | 7.30E-05 |
| 5 | 1355 | F2 vs. L2 | - | Regulation | Translation   | establishment of RNA localization                                                        | GO:0051236 | P | 41   | 7.24E-04 | 8.88E-03 |
| 5 | 1356 | F2 vs. L2 | - | Regulation | Translation   | large ribosomal subunit                                                                  | GO:0015934 | C | 111  | 2.96E-09 | 7.52E-08 |
| 5 | 1357 | F2 vs. L2 | - | Regulation | Translation   | maturation of 5.8S rRNA                                                                  | GO:0000460 | P | 16   | 2.79E-03 | 2.74E-02 |
| 5 | 1358 | F2 vs. L2 | - | Regulation | Translation   | maturation of LSU-rRNA                                                                   | GO:0000470 | P | 30   | 2.52E-04 | 3.73E-03 |
| 5 | 1359 | F2 vs. L2 | - | Regulation | Translation   | maturation of SSU-rRNA                                                                   | GO:0030490 | P | 34   | 2.89E-05 | 6.12E-04 |
| 5 | 1360 | F2 vs. L2 | - | Regulation | Translation   | maturation of SSU-rRNA from tricistronic rRNA transcript (SSU-rRNA, 5.8S rRNA, LSU-rRNA) | GO:0000462 | P | 23   | 1.72E-04 | 2.68E-03 |
| 5 | 1361 | F2 vs. L2 | - | Regulation | Translation   | mitochondrial large ribosomal subunit                                                    | GO:0005762 | C | 13   | 4.09E-04 | 3.26E-03 |
| 5 | 1362 | F2 vs. L2 | - | Regulation | Translation   | mitochondrial ribosome                                                                   | GO:0005761 | C | 22   | 1.39E-04 | 1.24E-03 |
| 5 | 1363 | F2 vs. L2 | - | Regulation | Translation   | mRNA cis splicing, via spliceosome                                                       | GO:0045292 | P | 25   | 8.34E-04 | 9.99E-03 |
| 5 | 1364 | F2 vs. L2 | - | Regulation | Translation   | mRNA cleavage factor complex                                                             | GO:0005849 | C | 8    | 1.59E-03 | 1.09E-02 |

|   |      |           |   |            |             |                                                                                      |            |   |     |          |          |
|---|------|-----------|---|------------|-------------|--------------------------------------------------------------------------------------|------------|---|-----|----------|----------|
| 5 | 1365 | F2 vs. L2 | - | Regulation | Translation | mRNA export from nucleus                                                             | GO:0006406 | P | 20  | 8.67E-04 | 1.03E-02 |
| 5 | 1366 | F2 vs. L2 | - | Regulation | Translation | mRNA metabolic process                                                               | GO:0016071 | P | 224 | 2.22E-15 | 4.57E-13 |
| 5 | 1367 | F2 vs. L2 | - | Regulation | Translation | mRNA splicing, via spliceosome                                                       | GO:0000398 | P | 117 | 2.88E-12 | 3.28E-10 |
| 5 | 1368 | F2 vs. L2 | - | Regulation | Translation | mRNA transport                                                                       | GO:0051028 | P | 21  | 3.08E-04 | 4.36E-03 |
| 5 | 1369 | F2 vs. L2 | - | Regulation | Translation | mRNA-containing ribonucleoprotein complex export from nucleus                        | GO:0071427 | P | 20  | 8.67E-04 | 1.03E-02 |
| 5 | 1370 | F2 vs. L2 | - | Regulation | Translation | ncRNA 3'-end processing                                                              | GO:0043628 | P | 18  | 5.73E-04 | 7.22E-03 |
| 5 | 1371 | F2 vs. L2 | - | Regulation | Translation | ncRNA metabolic process                                                              | GO:0034660 | P | 244 | 0.00E+00 | 0.00E+00 |
| 5 | 1372 | F2 vs. L2 | - | Regulation | Translation | ncRNA processing                                                                     | GO:0034470 | P | 202 | 1.11E-16 | 2.97E-14 |
| 5 | 1373 | F2 vs. L2 | - | Regulation | Translation | negative regulation of RNA metabolic process                                         | GO:0051253 | P | 139 | 1.13E-05 | 2.72E-04 |
| 5 | 1374 | F2 vs. L2 | - | Regulation | Translation | nuclear mRNA surveillance                                                            | GO:0071028 | P | 6   | 5.56E-03 | 4.71E-02 |
| 5 | 1375 | F2 vs. L2 | - | Regulation | Translation | organellar large ribosomal subunit                                                   | GO:0000315 | C | 19  | 4.85E-03 | 2.60E-02 |
| 5 | 1376 | F2 vs. L2 | - | Regulation | Translation | organellar ribosome                                                                  | GO:0000313 | C | 34  | 2.48E-04 | 2.10E-03 |
| 5 | 1377 | F2 vs. L2 | - | Regulation | Translation | peptide biosynthetic process                                                         | GO:0043043 | P | 306 | 2.61E-09 | 1.66E-07 |
| 5 | 1378 | F2 vs. L2 | - | Regulation | Translation | posttranscriptional gene silencing                                                   | GO:0016441 | P | 50  | 1.13E-06 | 3.82E-05 |
| 5 | 1379 | F2 vs. L2 | - | Regulation | Translation | posttranscriptional regulation of gene expression                                    | GO:0010608 | P | 121 | 3.14E-06 | 9.03E-05 |
| 5 | 1380 | F2 vs. L2 | - | Regulation | Translation | precatalytic spliceosome                                                             | GO:0071011 | C | 18  | 1.78E-04 | 1.53E-03 |
| 5 | 1381 | F2 vs. L2 | - | Regulation | Translation | preribosome                                                                          | GO:0030684 | C | 51  | 1.08E-07 | 1.84E-06 |
| 5 | 1382 | F2 vs. L2 | - | Regulation | Translation | preribosome, large subunit precursor                                                 | GO:0030687 | C | 16  | 2.52E-04 | 2.11E-03 |
| 5 | 1383 | F2 vs. L2 | - | Regulation | Translation | prespliceosome                                                                       | GO:0071010 | C | 14  | 2.56E-03 | 1.60E-02 |
| 5 | 1384 | F2 vs. L2 | - | Regulation | Translation | primary miRNA processing                                                             | GO:0031053 | P | 9   | 4.40E-03 | 3.92E-02 |
| 5 | 1385 | F2 vs. L2 | - | Regulation | Translation | production of miRNAs involved in gene silencing by miRNA                             | GO:0035196 | P | 17  | 8.57E-05 | 1.53E-03 |
| 5 | 1386 | F2 vs. L2 | - | Regulation | Translation | regulation of RNA metabolic process                                                  | GO:0051252 | P | 995 | 1.41E-05 | 3.28E-04 |
| 5 | 1387 | F2 vs. L2 | - | Regulation | Translation | regulation of RNA splicing                                                           | GO:0043484 | P | 40  | 2.53E-03 | 2.53E-02 |
| 5 | 1388 | F2 vs. L2 | - | Regulation | Translation | ribonucleoprotein complex                                                            | GO:190904  | C | 392 | 0.00E+00 | 0.00E+00 |
| 5 | 1389 | F2 vs. L2 | - | Regulation | Translation | ribonucleoprotein complex assembly                                                   | GO:0022618 | P | 104 | 1.79E-09 | 1.20E-07 |
| 5 | 1390 | F2 vs. L2 | - | Regulation | Translation | ribonucleoprotein complex biogenesis                                                 | GO:0022613 | P | 256 | 6.66E-16 | 1.62E-13 |
| 5 | 1391 | F2 vs. L2 | - | Regulation | Translation | ribonucleoprotein complex export from nucleus                                        | GO:0071426 | P | 32  | 1.55E-03 | 1.68E-02 |
| 5 | 1392 | F2 vs. L2 | - | Regulation | Translation | ribonucleoprotein complex localization                                               | GO:0071166 | P | 32  | 1.55E-03 | 1.68E-02 |
| 5 | 1393 | F2 vs. L2 | - | Regulation | Translation | ribonucleoprotein complex subunit organization                                       | GO:0071826 | P | 106 | 1.96E-09 | 1.29E-07 |
| 5 | 1394 | F2 vs. L2 | - | Regulation | Translation | ribosomal large subunit assembly                                                     | GO:0000027 | P | 30  | 1.54E-03 | 1.67E-02 |
| 5 | 1395 | F2 vs. L2 | - | Regulation | Translation | ribosomal large subunit biogenesis                                                   | GO:0042273 | P | 73  | 1.49E-08 | 7.72E-07 |
| 5 | 1396 | F2 vs. L2 | - | Regulation | Translation | ribosomal small subunit biogenesis                                                   | GO:0042274 | P | 58  | 1.47E-06 | 4.67E-05 |
| 5 | 1397 | F2 vs. L2 | - | Regulation | Translation | ribosomal subunit                                                                    | GO:0044391 | C | 204 | 5.55E-16 | 2.23E-14 |
| 5 | 1398 | F2 vs. L2 | - | Regulation | Translation | ribosome                                                                             | GO:0005840 | C | 259 | 8.42E-08 | 1.48E-06 |
| 5 | 1399 | F2 vs. L2 | - | Regulation | translation | ribosome assembly                                                                    | GO:0042255 | P | 58  | 2.28E-04 | 3.43E-03 |
| 5 | 1400 | F2 vs. L2 | - | Regulation | Translation | ribosome biogenesis                                                                  | GO:0042254 | P | 208 | 1.70E-11 | 1.59E-09 |
| 5 | 1401 | F2 vs. L2 | - | Regulation | Translation | RNA cap binding                                                                      | GO:0000339 | F | 8   | 3.91E-04 | 1.16E-02 |
| 5 | 1402 | F2 vs. L2 | - | Regulation | Translation | RNA export from nucleus                                                              | GO:0006405 | P | 38  | 1.17E-03 | 1.32E-02 |
| 5 | 1403 | F2 vs. L2 | - | Regulation | Translation | RNA helicase activity                                                                | GO:0003724 | F | 51  | 1.25E-03 | 2.85E-02 |
| 5 | 1404 | F2 vs. L2 | - | Regulation | Translation | RNA interference                                                                     | GO:0016246 | P | 24  | 1.62E-04 | 2.58E-03 |
| 5 | 1405 | F2 vs. L2 | - | Regulation | Translation | RNA localization                                                                     | GO:0006403 | P | 43  | 2.92E-04 | 4.22E-03 |
| 5 | 1406 | F2 vs. L2 | - | Regulation | Translation | RNA methyltransferase activity                                                       | GO:0008173 | F | 36  | 2.12E-05 | 1.13E-03 |
| 5 | 1407 | F2 vs. L2 | - | Regulation | Translation | RNA phosphodiester bond hydrolysis                                                   | GO:0090501 | P | 22  | 1.11E-05 | 2.70E-04 |
| 5 | 1408 | F2 vs. L2 | - | Regulation | Translation | RNA processing                                                                       | GO:0006396 | P | 428 | 0.00E+00 | 0.00E+00 |
| 5 | 1409 | F2 vs. L2 | - | Regulation | Translation | RNA splicing                                                                         | GO:0008380 | P | 154 | 6.82E-13 | 7.93E-11 |
| 5 | 1410 | F2 vs. L2 | - | Regulation | Translation | RNA splicing, via transesterification reactions                                      | GO:0000375 | P | 128 | 6.19E-12 | 6.37E-10 |
| 5 | 1411 | F2 vs. L2 | - | Regulation | Translation | RNA splicing, via transesterification reactions with bulged adenosine as nucleophile | GO:0000377 | P | 128 | 6.19E-12 | 6.50E-10 |
| 5 | 1412 | F2 vs. L2 | - | Regulation | Translation | rRNA binding                                                                         | GO:0019843 | F | 37  | 1.16E-03 | 2.69E-02 |
| 5 | 1413 | F2 vs. L2 | - | Regulation | Translation | rRNA metabolic process                                                               | GO:0016072 | P | 139 | 3.71E-08 | 1.82E-06 |
| 5 | 1414 | F2 vs. L2 | - | Regulation | Translation | rRNA methylation                                                                     | GO:0031167 | P | 12  | 5.92E-03 | 4.95E-02 |
| 5 | 1415 | F2 vs. L2 | - | Regulation | Translation | rRNA modification                                                                    | GO:0000154 | P | 17  | 2.78E-03 | 2.73E-02 |
| 5 | 1416 | F2 vs. L2 | - | Regulation | Translation | rRNA processing                                                                      | GO:0006364 | P | 134 | 9.55E-08 | 4.33E-06 |
| 5 | 1417 | F2 vs. L2 | - | Regulation | Translation | small nuclear ribonucleoprotein complex                                              | GO:0030532 | C | 39  | 1.19E-08 | 2.44E-07 |
| 5 | 1418 | F2 vs. L2 | - | Regulation | Translation | small nucleolar ribonucleoprotein complex                                            | GO:0005732 | C | 17  | 4.17E-04 | 3.30E-03 |
| 5 | 1419 | F2 vs. L2 | - | Regulation | Translation | small ribosomal subunit                                                              | GO:0015935 | C | 93  | 2.45E-08 | 4.73E-07 |
| 5 | 1420 | F2 vs. L2 | - | Regulation | Translation | small-subunit processome                                                             | GO:0032040 | C | 27  | 3.83E-05 | 4.20E-04 |
| 5 | 1421 | F2 vs. L2 | - | Regulation | Translation | snRNA metabolic process                                                              | GO:0016073 | P | 11  | 2.36E-03 | 2.38E-02 |
| 5 | 1422 | F2 vs. L2 | - | Regulation | Translation | snRNA processing                                                                     | GO:0016180 | P | 9   | 5.08E-03 | 4.41E-02 |
| 5 | 1423 | F2 vs. L2 | - | Regulation | Translation | spliceosomal complex                                                                 | GO:0005681 | C | 88  | 1.01E-11 | 3.15E-10 |
| 5 | 1424 | F2 vs. L2 | - | Regulation | Translation | spliceosomal snRNP assembly                                                          | GO:0000387 | P | 15  | 1.74E-04 | 2.70E-03 |
| 5 | 1425 | F2 vs. L2 | - | Regulation | Translation | spliceosomal snRNP complex                                                           | GO:0097525 | C | 39  | 1.19E-08 | 2.50E-07 |
| 5 | 1426 | F2 vs. L2 | - | Regulation | Translation | spliceosomal tri-snRNP complex                                                       | GO:0097526 | C | 20  | 8.75E-07 | 1.30E-05 |

|   |      |           |   |                        |               |                                                                         |            |   |      |          |          |
|---|------|-----------|---|------------------------|---------------|-------------------------------------------------------------------------|------------|---|------|----------|----------|
| 5 | 1427 | F2 vs. L2 | - | Regulation             | Translation   | structural constituent of ribosome                                      | GO:0003735 | F | 195  | 1.41E-11 | 4.27E-09 |
| 5 | 1428 | F2 vs. L2 | - | Regulation             | Translation   | translation                                                             | GO:0006412 | P | 304  | 1.18E-09 | 8.23E-08 |
| 5 | 1429 | F2 vs. L2 | - | Regulation             | Translation   | tRNA metabolic process                                                  | GO:0006399 | P | 91   | 8.52E-10 | 6.42E-08 |
| 5 | 1430 | F2 vs. L2 | - | Regulation             | Translation   | tRNA modification                                                       | GO:0006400 | P | 47   | 3.91E-08 | 1.90E-06 |
| 5 | 1431 | F2 vs. L2 | - | Regulation             | Translation   | tRNA processing                                                         | GO:0008033 | P | 56   | 1.62E-09 | 1.10E-07 |
| 5 | 1432 | F2 vs. L2 | - | Regulation             | Translation   | U1 snRNP                                                                | GO:0005685 | C | 16   | 8.50E-04 | 6.22E-03 |
| 5 | 1433 | F2 vs. L2 | - | Regulation             | Translation   | U12-type spliceosomal complex                                           | GO:0005689 | C | 14   | 3.72E-03 | 2.12E-02 |
| 5 | 1434 | F2 vs. L2 | - | Regulation             | Translation   | U2 snRNP                                                                | GO:0005686 | C | 17   | 1.77E-04 | 1.54E-03 |
| 5 | 1435 | F2 vs. L2 | - | Regulation             | Translation   | U2-type prespliceosome                                                  | GO:0071004 | C | 14   | 2.56E-03 | 1.59E-02 |
| 5 | 1436 | F2 vs. L2 | - | Regulation             | Translation   | U2-type spliceosomal complex                                            | GO:0005684 | C | 35   | 1.53E-05 | 1.83E-04 |
| 5 | 1437 | F2 vs. L2 | - | Regulation             | Translation   | U4 snRNP                                                                | GO:0005687 | C | 8    | 4.92E-03 | 2.62E-02 |
| 5 | 1438 | F2 vs. L2 | - | Regulation             | Translation   | U4/U6 x U5 tri-snRNP complex                                            | GO:0046540 | C | 16   | 9.97E-06 | 1.25E-04 |
| 5 | 1439 | F2 vs. L2 | - | Regulation             | translation   | U5 snRNP                                                                | GO:0005682 | C | 11   | 2.18E-03 | 1.39E-02 |
| 5 | 1440 | F2 vs. L2 | - | Signaling and response | Signaling     | cellular response to brassinosteroid stimulus                           | GO:0071367 | P | 35   | 5.45E-03 | 4.66E-02 |
| 5 | 1441 | F2 vs. L2 | - | Signaling and response | Signaling     | kinase regulator activity                                               | GO:0019207 | F | 40   | 6.04E-05 | 2.49E-03 |
| 5 | 1442 | F2 vs. L2 | - | Signaling and response | Signaling     | negative regulation of long-day photoperiodism, flowering               | GO:0048579 | P | 5    | 4.09E-03 | 3.69E-02 |
| 5 | 1443 | F2 vs. L2 | - | Signaling and response | Signaling     | protein kinase complex                                                  | GO:1902911 | C | 42   | 1.04E-05 | 1.29E-04 |
| 5 | 1444 | F2 vs. L2 | - | Signaling and response | Signaling     | protein kinase regulator activity                                       | GO:0019887 | F | 39   | 4.74E-05 | 2.05E-03 |
|   |      |           |   |                        |               | regulation of cyclin-dependent protein serine/threonine kinase activity | GO:0000079 | P | 22   | 6.81E-04 | 8.41E-03 |
| 5 | 1445 | F2 vs. L2 | - | Signaling and response | Signaling     | regulation of kinase activity                                           | GO:0043549 | P | 39   | 1.44E-04 | 2.35E-03 |
| 5 | 1446 | F2 vs. L2 | - | Signaling and response | Signaling     | regulation of protein kinase activity                                   | GO:0045859 | P | 37   | 1.52E-04 | 2.43E-03 |
| 5 | 1447 | F2 vs. L2 | - | Signaling and response | Signaling     | regulation of protein phosphorylation                                   | GO:0001932 | P | 45   | 2.38E-03 | 2.39E-02 |
| 5 | 1448 | F2 vs. L2 | - | Signaling and response | Signaling     | regulation of protein serine/threonine kinase activity                  | GO:0071900 | P | 31   | 8.72E-04 | 1.03E-02 |
| 5 | 1449 | F2 vs. L2 | - | Signaling and response | Signaling     | response to brassinosteroid                                             | GO:0009741 | P | 53   | 4.10E-03 | 3.69E-02 |
| 5 | 1450 | F2 vs. L2 | - | Signaling and response | Signaling     | serine/threonine protein kinase complex                                 | GO:1902554 | C | 40   | 1.53E-05 | 1.84E-04 |
| 5 | 1451 | F2 vs. L2 | - | Signaling and response | Stress        | cellular response to DNA damage stimulus                                | GO:0006974 | P | 190  | 0.00E+00 | 0.00E+00 |
| 5 | 1452 | F2 vs. L2 | - | Signaling and response | Stress        | damaged DNA binding                                                     | GO:0003684 | F | 26   | 1.89E-03 | 3.89E-02 |
| 5 | 1453 | F2 vs. L2 | - | Signaling and response | Stress        | site of DNA damage                                                      | GO:0090734 | C | 6    | 1.08E-02 | 4.98E-02 |
| 5 | 1454 | F2 vs. L2 | - | Signaling and response | Stress        | nucleobase-containing small molecule metabolic process                  | GO:0055086 | P | 264  | 2.09E-06 | 5.34E-05 |
| 6 | 1455 | F3 vs. L3 | + | Development            | Cell division | nucleoside diphosphate metabolic process                                | GO:0009132 | P | 55   | 5.30E-03 | 4.14E-02 |
| 6 | 1456 | F3 vs. L3 | + | Development            | Cell division | nucleoside phosphate binding                                            | GO:1901265 | F | 636  | 4.54E-05 | 1.70E-03 |
| 6 | 1457 | F3 vs. L3 | + | Development            | Cell division | nucleoside phosphate metabolic process                                  | GO:0006753 | P | 197  | 5.39E-03 | 4.20E-02 |
| 6 | 1458 | F3 vs. L3 | + | Development            | Cell division | nucleotide binding                                                      | GO:0000166 | F | 636  | 4.54E-05 | 1.72E-03 |
| 6 | 1459 | F3 vs. L3 | + | Development            | Cell division | nucleotide-sugar biosynthetic process                                   | GO:0009226 | P | 32   | 5.55E-07 | 1.65E-05 |
| 6 | 1460 | F3 vs. L3 | + | Development            | Cell division | nucleotide-sugar metabolic process                                      | GO:0009225 | P | 36   | 8.25E-08 | 3.07E-06 |
| 6 | 1461 | F3 vs. L3 | + | Development            | Cell division | pollen germination                                                      | GO:0009846 | P | 40   | 3.03E-05 | 5.40E-04 |
| 6 | 1462 | F3 vs. L3 | + | Development            | Cell division | pollen tube development                                                 | GO:0048868 | P | 111  | 3.79E-13 | 4.37E-11 |
| 6 | 1463 | F3 vs. L3 | + | Development            | Cell division | pollen tube growth                                                      | GO:0009860 | P | 81   | 6.83E-13 | 7.42E-11 |
| 6 | 1464 | F3 vs. L3 | + | Development            | Cell division | pollen tube guidance                                                    | GO:0010183 | P | 23   | 6.43E-04 | 7.49E-03 |
| 6 | 1465 | F3 vs. L3 | + | Development            | Cell division | pollination                                                             | GO:0009856 | P | 166  | 5.68E-10 | 3.35E-08 |
| 6 | 1466 | F3 vs. L3 | + | Development            | Cell division | ribonucleotide metabolic process                                        | GO:0009259 | P | 156  | 4.21E-03 | 3.44E-02 |
| 6 | 1467 | F3 vs. L3 | + | Development            | Cell division | ribose phosphate metabolic process                                      | GO:0019693 | P | 163  | 5.42E-03 | 4.22E-02 |
| 6 | 1468 | F3 vs. L3 | + | Development            | Cell division | syncytium formation                                                     | GO:0006949 | P | 11   | 7.34E-05 | 1.18E-03 |
| 6 | 1469 | F3 vs. L3 | + | Development            | Development   | actin cytoskeleton                                                      | GO:0015629 | C | 38   | 8.43E-04 | 5.82E-03 |
| 6 | 1470 | F3 vs. L3 | + | Development            | Development   | actin cytoskeleton organization                                         | GO:0030036 | P | 63   | 9.83E-04 | 1.06E-02 |
| 6 | 1471 | F3 vs. L3 | + | Development            | Development   | apical part of cell                                                     | GO:0045177 | C | 16   | 4.25E-04 | 3.39E-03 |
| 6 | 1472 | F3 vs. L3 | + | Development            | Development   | apical plasma membrane                                                  | GO:0016324 | C | 15   | 6.81E-04 | 5.02E-03 |
| 6 | 1473 | F3 vs. L3 | + | Development            | Development   | apoplast                                                                | GO:0048046 | C | 190  | 0.00E+00 | 0.00E+00 |
| 6 | 1474 | F3 vs. L3 | + | Development            | Development   | bounding membrane of organelle                                          | GO:0098588 | C | 618  | 9.22E-08 | 1.40E-06 |
| 6 | 1475 | F3 vs. L3 | + | Development            | Development   | cell development                                                        | GO:0048468 | P | 192  | 7.68E-07 | 2.13E-05 |
| 6 | 1476 | F3 vs. L3 | + | Development            | Development   | cell differentiation                                                    | GO:0030154 | P | 337  | 8.47E-04 | 9.31E-03 |
| 6 | 1477 | F3 vs. L3 | + | Development            | Development   | cell growth                                                             | GO:0016049 | P | 246  | 1.15E-06 | 3.05E-05 |
| 6 | 1478 | F3 vs. L3 | + | Development            | Development   | cell junction                                                           | GO:0030054 | C | 610  | 3.07E-03 | 1.79E-02 |
| 6 | 1479 | F3 vs. L3 | + | Development            | Development   | cell morphogenesis                                                      | GO:0000902 | P | 227  | 1.88E-04 | 2.68E-03 |
| 6 | 1480 | F3 vs. L3 | + | Development            | Development   | cell morphogenesis involved in differentiation                          | GO:0000904 | P | 136  | 7.90E-07 | 2.16E-05 |
| 6 | 1481 | F3 vs. L3 | + | Development            | Development   | cell periphery                                                          | GO:0071944 | C | 2511 | 4.70E-14 | 1.69E-12 |
| 6 | 1482 | F3 vs. L3 | + | Development            | Development   | cell pole                                                               | GO:0060187 | C | 14   | 7.27E-04 | 5.28E-03 |
| 6 | 1483 | F3 vs. L3 | + | Development            | Development   | cell projection                                                         | GO:0042995 | C | 73   | 1.67E-10 | 4.17E-09 |
| 6 | 1484 | F3 vs. L3 | + | Development            | Development   | cell tip                                                                | GO:0051286 | C | 14   | 7.27E-04 | 5.24E-03 |
| 6 | 1485 | F3 vs. L3 | + | Development            | Development   | cell tip growth                                                         | GO:0009932 | P | 94   | 8.65E-12 | 7.99E-10 |
| 6 | 1486 | F3 vs. L3 | + | Development            | Development   | cell wall                                                               | GO:0005618 | C | 368  | 2.26E-06 | 2.90E-05 |
| 6 | 1487 | F3 vs. L3 | + | Development            | Development   | cell wall biogenesis                                                    | GO:0042546 | P | 156  | 3.31E-05 | 5.81E-04 |
| 6 | 1488 | F3 vs. L3 | + | Development            | Development   | cell wall modification                                                  | GO:0042545 | P | 121  | 2.75E-05 | 4.95E-04 |
| 6 | 1489 | F3 vs. L3 | + | Development            | Development   |                                                                         |            |   |      |          |          |



|   |      |           |   |             |               |                                                             |            |   |      |          |          |
|---|------|-----------|---|-------------|---------------|-------------------------------------------------------------|------------|---|------|----------|----------|
| 6 | 1490 | F3 vs. L3 | + | Development | Development   | cell wall organization                                      | GO:0071555 | P | 184  | 7.87E-07 | 2.16E-05 |
| 6 | 1491 | F3 vs. L3 | + | Development | Development   | cell wall organization or biogenesis                        | GO:0071554 | P | 333  | 3.93E-10 | 2.39E-08 |
| 6 | 1492 | F3 vs. L3 | + | Development | Development   | cell wall pectin metabolic process                          | GO:0052546 | P | 16   | 2.04E-04 | 2.87E-03 |
| 6 | 1493 | F3 vs. L3 | + | Development | Development   | cell-cell junction                                          | GO:0005911 | C | 610  | 3.07E-03 | 1.82E-02 |
| 6 | 1494 | F3 vs. L3 | + | Development | Development   | cellular developmental process                              | GO:0048869 | P | 390  | 2.83E-03 | 2.53E-02 |
| 6 | 1495 | F3 vs. L3 | + | Development | Development   | cytoplasm                                                   | GO:0005737 | C | 8209 | 5.27E-06 | 6.18E-05 |
| 6 | 1496 | F3 vs. L3 | + | Development | Development   | cytosol                                                     | GO:0005829 | C | 2250 | 9.96E-10 | 2.02E-08 |
| 6 | 1497 | F3 vs. L3 | + | Development | Development   | developmental cell growth                                   | GO:0048588 | P | 120  | 1.30E-12 | 1.36E-10 |
| 6 | 1498 | F3 vs. L3 | + | Development | Development   | developmental growth                                        | GO:0048589 | P | 247  | 8.62E-09 | 4.16E-07 |
| 6 | 1499 | F3 vs. L3 | + | Development | Development   | developmental growth involved in morphogenesis              | GO:0060560 | P | 211  | 9.10E-09 | 4.35E-07 |
| 6 | 1500 | F3 vs. L3 | + | Development | Development   | endomembrane system                                         | GO:0012505 | C | 1470 | 2.12E-09 | 4.05E-08 |
| 6 | 1501 | F3 vs. L3 | + | Development | Development   | envelope                                                    | GO:0031975 | C | 697  | 1.11E-10 | 2.99E-09 |
| 6 | 1502 | F3 vs. L3 | + | Development | Development   | external encapsulating structure                            | GO:0030312 | C | 370  | 1.03E-06 | 1.41E-05 |
| 6 | 1503 | F3 vs. L3 | + | Development | Development   | external encapsulating structure organization               | GO:0045229 | P | 213  | 1.44E-07 | 5.08E-06 |
| 6 | 1504 | F3 vs. L3 | + | Development | Development   | extracellular region                                        | GO:0005576 | C | 1453 | 0.00E+00 | 0.00E+00 |
| 6 | 1505 | F3 vs. L3 | + | Development | Development   | extracellular space                                         | GO:0005615 | C | 69   | 5.03E-04 | 3.83E-03 |
| 6 | 1506 | F3 vs. L3 | + | Development | Development   | Golgi apparatus subcompartment                              | GO:0098791 | C | 308  | 7.13E-08 | 1.10E-06 |
| 6 | 1507 | F3 vs. L3 | + | Development | Development   | Golgi cisterna                                              | GO:0031985 | C | 136  | 4.80E-04 | 3.68E-03 |
| 6 | 1508 | F3 vs. L3 | + | Development | Development   | Golgi stack                                                 | GO:0005795 | C | 143  | 5.45E-04 | 4.11E-03 |
| 6 | 1509 | F3 vs. L3 | + | Development | Development   | Golgi trans cisterna                                        | GO:0000138 | C | 62   | 1.41E-04 | 1.26E-03 |
| 6 | 1510 | F3 vs. L3 | + | Development | Development   | growing cell tip                                            | GO:0035838 | C | 11   | 4.32E-04 | 3.39E-03 |
| 6 | 1511 | F3 vs. L3 | + | Development | Development   | growth                                                      | GO:0040007 | P | 285  | 2.89E-07 | 9.36E-06 |
| 6 | 1512 | F3 vs. L3 | + | Development | Development   | hemicellulose metabolic process                             | GO:0010410 | P | 66   | 4.88E-03 | 3.87E-02 |
| 6 | 1513 | F3 vs. L3 | + | Development | Development   | intracellular vesicle                                       | GO:0097708 | C | 490  | 1.07E-08 | 1.85E-07 |
| 6 | 1514 | F3 vs. L3 | + | Development | Development   | lytic vacuole                                               | GO:0000323 | C | 39   | 8.72E-04 | 5.89E-03 |
| 6 | 1515 | F3 vs. L3 | + | Development | Development   | membrane                                                    | GO:0016020 | C | 3430 | 0.00E+00 | 0.00E+00 |
| 6 | 1516 | F3 vs. L3 | + | Development | Development   | microbody                                                   | GO:0042579 | C | 203  | 3.01E-05 | 3.02E-04 |
| 6 | 1517 | F3 vs. L3 | + | Development | Development   | multi-multicellular organism process                        | GO:0044706 | P | 166  | 5.68E-10 | 3.38E-08 |
| 6 | 1518 | F3 vs. L3 | + | Development | Development   | myosin complex                                              | GO:0016459 | C | 4    | 9.13E-03 | 4.68E-02 |
| 6 | 1519 | F3 vs. L3 | + | Development | Development   | organelle envelope                                          | GO:0031967 | C | 697  | 1.11E-10 | 2.91E-09 |
| 6 | 1520 | F3 vs. L3 | + | Development | Development   | organelle membrane                                          | GO:0031090 | C | 959  | 2.73E-06 | 3.41E-05 |
| 6 | 1521 | F3 vs. L3 | + | Development | Development   | organelle subcompartment                                    | GO:0031984 | C | 809  | 5.70E-13 | 1.98E-11 |
| 6 | 1522 | F3 vs. L3 | + | Development | Development   | plant-type cell wall biogenesis                             | GO:0009832 | P | 104  | 5.67E-05 | 9.32E-04 |
| 6 | 1523 | F3 vs. L3 | + | Development | Development   | plant-type cell wall loosening                              | GO:0009828 | P | 26   | 2.07E-03 | 1.98E-02 |
| 6 | 1524 | F3 vs. L3 | + | Development | Development   | plant-type cell wall modification                           | GO:0009827 | P | 47   | 1.64E-04 | 2.39E-03 |
| 6 | 1525 | F3 vs. L3 | + | Development | Development   | plant-type cell wall organization                           | GO:0009664 | P | 101  | 5.12E-06 | 1.18E-04 |
| 6 | 1526 | F3 vs. L3 | + | Development | Development   | plant-type cell wall organization or biogenesis             | GO:0071669 | P | 176  | 1.66E-08 | 7.26E-07 |
| 6 | 1527 | F3 vs. L3 | + | Development | Development   | plant-type primary cell wall biogenesis                     | GO:0009833 | P | 24   | 1.12E-04 | 1.71E-03 |
| 6 | 1528 | F3 vs. L3 | + | Development | Development   | plant-type secondary cell wall biogenesis                   | GO:0009834 | P | 38   | 3.28E-03 | 2.82E-02 |
| 6 | 1529 | F3 vs. L3 | + | Development | Development   | plant-type vacuole                                          | GO:0000325 | C | 104  | 2.07E-06 | 2.68E-05 |
| 6 | 1530 | F3 vs. L3 | + | Development | Development   | plant-type vacuole membrane                                 | GO:0009705 | C | 71   | 2.04E-03 | 1.26E-02 |
| 6 | 1531 | F3 vs. L3 | + | Development | Development   | plasma membrane                                             | GO:0005886 | C | 2215 | 3.56E-11 | 1.02E-09 |
| 6 | 1532 | F3 vs. L3 | + | Development | Development   | plasma membrane bounded cell projection                     | GO:0120025 | C | 63   | 4.30E-14 | 1.61E-12 |
| 6 | 1533 | F3 vs. L3 | + | Development | Development   | plasma membrane region                                      | GO:0098590 | C | 31   | 8.56E-03 | 4.50E-02 |
| 6 | 1534 | F3 vs. L3 | + | Development | Development   | pollen tube                                                 | GO:0090406 | C | 55   | 6.37E-13 | 2.14E-11 |
| 6 | 1535 | F3 vs. L3 | + | Development | Development   | pollen tube tip                                             | GO:0090404 | C | 11   | 4.32E-04 | 3.41E-03 |
| 6 | 1536 | F3 vs. L3 | + | Development | Development   | secretion                                                   | GO:0046903 | P | 52   | 1.50E-04 | 2.19E-03 |
| 6 | 1537 | F3 vs. L3 | + | Development | Development   | secretion by cell                                           | GO:0032940 | P | 47   | 1.17E-03 | 1.23E-02 |
| 6 | 1538 | F3 vs. L3 | + | Development | Development   | site of polarized growth                                    | GO:0030427 | C | 13   | 8.75E-03 | 4.57E-02 |
| 6 | 1539 | F3 vs. L3 | + | Development | Development   | stamen filament development                                 | GO:0080086 | P | 7    | 2.46E-04 | 3.31E-03 |
| 6 | 1540 | F3 vs. L3 | + | Development | Development   | stromule                                                    | GO:0010319 | C | 32   | 2.79E-09 | 5.21E-08 |
| 6 | 1541 | F3 vs. L3 | + | Development | Development   | symplast                                                    | GO:0055044 | C | 610  | 3.07E-03 | 1.81E-02 |
| 6 | 1542 | F3 vs. L3 | + | Development | Development   | unidimensional cell growth                                  | GO:0009826 | P | 176  | 3.07E-07 | 9.89E-06 |
| 6 | 1543 | F3 vs. L3 | + | Development | Development   | vacuolar membrane                                           | GO:0005774 | C | 389  | 1.31E-09 | 2.60E-08 |
| 6 | 1544 | F3 vs. L3 | + | Development | Development   | vacuole                                                     | GO:0005773 | C | 737  | 0.00E+00 | 0.00E+00 |
| 6 | 1545 | F3 vs. L3 | + | Metabolism  | Bioenergetics | (1->3)-beta-D-glucan binding (NAD+) activity                | GO:0004029 | F | 10   | 1.01E-03 | 2.22E-02 |
| 6 | 1546 | F3 vs. L3 | + | Metabolism  | Bioenergetics | ADP metabolic process                                       | GO:0046031 | P | 43   | 3.14E-03 | 2.75E-02 |
| 6 | 1547 | F3 vs. L3 | + | Metabolism  | Bioenergetics | aerobic respiration                                         | GO:0009060 | P | 64   | 1.73E-05 | 3.23E-04 |
| 6 | 1548 | F3 vs. L3 | + | Metabolism  | Bioenergetics | aldehyde dehydrogenase [NAD(P)+] activity                   | GO:0004030 | F | 10   | 1.01E-03 | 2.23E-02 |
| 6 | 1549 | F3 vs. L3 | + | Metabolism  | Bioenergetics | aldo-keto reductase (NADP) activity                         | GO:0004033 | F | 9    | 2.85E-03 | 4.88E-02 |
| 6 | 1550 | F3 vs. L3 | + | Metabolism  | Bioenergetics | ATP metabolic process                                       | GO:0046034 | P | 95   | 5.61E-04 | 6.72E-03 |
| 6 | 1551 | F3 vs. L3 | + | Metabolism  | Bioenergetics | ATPase activity, coupled to transmembrane movement of ions, | GO:0044769 | F | 19   | 1.01E-03 | 2.19E-02 |
| 6 | 1552 | F3 vs. L3 | + | Metabolism  | Bioenergetics | rotational mechanism                                        | GO:0016051 | P | 219  | 1.17E-13 | 1.55E-11 |
|   |      |           |   |             |               | carbohydrate biosynthetic process                           |            |   |      |          |          |

|   |      |           |   |            |               |                                                                                                       |            |   |     |          |          |
|---|------|-----------|---|------------|---------------|-------------------------------------------------------------------------------------------------------|------------|---|-----|----------|----------|
| 6 | 1553 | F3 vs. L3 | + | Metabolism | Bioenergetics | carbohydrate catabolic process                                                                        | GO:0016052 | P | 167 | 1.29E-08 | 6.13E-07 |
| 6 | 1554 | F3 vs. L3 | + | Metabolism | Bioenergetics | carbohydrate derivative biosynthetic process                                                          | GO:1901137 | P | 305 | 1.32E-03 | 1.36E-02 |
| 6 | 1555 | F3 vs. L3 | + | Metabolism | Bioenergetics | carbohydrate derivative metabolic process                                                             | GO:1901135 | P | 493 | 1.57E-07 | 5.47E-06 |
| 6 | 1556 | F3 vs. L3 | + | Metabolism | Bioenergetics | carbohydrate metabolic process                                                                        | GO:0005975 | P | 626 | 0.00E+00 | 0.00E+00 |
| 6 | 1557 | F3 vs. L3 | + | Metabolism | Bioenergetics | cellular carbohydrate biosynthetic process                                                            | GO:0034637 | P | 152 | 9.91E-07 | 2.64E-05 |
| 6 | 1558 | F3 vs. L3 | + | Metabolism | Bioenergetics | cellular carbohydrate catabolic process                                                               | GO:0044275 | P | 37  | 4.26E-03 | 3.47E-02 |
| 6 | 1559 | F3 vs. L3 | + | Metabolism | Bioenergetics | cellular carbohydrate metabolic process                                                               | GO:0044262 | P | 273 | 4.45E-11 | 3.33E-09 |
| 6 | 1560 | F3 vs. L3 | + | Metabolism | Bioenergetics | cellular polysaccharide biosynthetic process                                                          | GO:0033692 | P | 124 | 3.74E-06 | 8.82E-05 |
| 6 | 1561 | F3 vs. L3 | + | Metabolism | Bioenergetics | cellular polysaccharide metabolic process                                                             | GO:0044264 | P | 184 | 1.21E-07 | 4.36E-06 |
| 6 | 1562 | F3 vs. L3 | + | Metabolism | Bioenergetics | cellular respiration                                                                                  | GO:0045333 | P | 95  | 8.36E-05 | 1.33E-03 |
| 6 | 1563 | F3 vs. L3 | + | Metabolism | Bioenergetics | CoA-ligase activity                                                                                   | GO:0016405 | F | 24  | 6.07E-05 | 2.13E-03 |
| 6 | 1564 | F3 vs. L3 | + | Metabolism | Bioenergetics | decanoate-CoA ligase activity                                                                         | GO:0102391 | F | 8   | 1.46E-03 | 2.90E-02 |
| 6 | 1565 | F3 vs. L3 | + | Metabolism | Bioenergetics | disaccharide metabolic process                                                                        | GO:0005984 | P | 57  | 4.52E-03 | 3.62E-02 |
| 6 | 1566 | F3 vs. L3 | + | Metabolism | Bioenergetics | electron transport chain                                                                              | GO:0022900 | P | 81  | 3.21E-03 | 2.78E-02 |
| 6 | 1567 | F3 vs. L3 | + | Metabolism | Bioenergetics | energy derivation by oxidation of organic compounds                                                   | GO:0015980 | P | 106 | 1.04E-04 | 1.61E-03 |
| 6 | 1568 | F3 vs. L3 | + | Metabolism | Bioenergetics | fatty acid biosynthetic process                                                                       | GO:0006633 | P | 93  | 9.40E-05 | 1.48E-03 |
| 6 | 1569 | F3 vs. L3 | + | Metabolism | Bioenergetics | fatty acid derivative metabolic process                                                               | GO:1901568 | P | 30  | 3.42E-03 | 2.93E-02 |
| 6 | 1570 | F3 vs. L3 | + | Metabolism | Bioenergetics | fatty acid ligase activity                                                                            | GO:0015645 | F | 13  | 5.18E-04 | 1.30E-02 |
| 6 | 1571 | F3 vs. L3 | + | Metabolism | Bioenergetics | fatty acid metabolic process                                                                          | GO:0006631 | P | 158 | 6.83E-08 | 2.59E-06 |
| 6 | 1572 | F3 vs. L3 | + | Metabolism | Bioenergetics | generation of precursor metabolites and energy                                                        | GO:0006091 | P | 267 | 1.59E-12 | 1.63E-10 |
| 6 | 1573 | F3 vs. L3 | + | Metabolism | Bioenergetics | gluconeogenesis                                                                                       | GO:0006094 | P | 21  | 1.02E-04 | 1.58E-03 |
| 6 | 1574 | F3 vs. L3 | + | Metabolism | Bioenergetics | glucose 6-phosphate metabolic process                                                                 | GO:0051156 | P | 34  | 2.01E-05 | 3.69E-04 |
| 6 | 1575 | F3 vs. L3 | + | Metabolism | Bioenergetics | glucose metabolic process                                                                             | GO:0006006 | P | 35  | 6.18E-04 | 7.29E-03 |
| 6 | 1576 | F3 vs. L3 | + | Metabolism | Bioenergetics | hexose biosynthetic process                                                                           | GO:0019319 | P | 23  | 4.39E-05 | 7.46E-04 |
| 6 | 1577 | F3 vs. L3 | + | Metabolism | Bioenergetics | hexose metabolic process                                                                              | GO:0019318 | P | 71  | 4.76E-03 | 3.78E-02 |
| 6 | 1578 | F3 vs. L3 | + | Metabolism | Bioenergetics | isocitrate metabolic process                                                                          | GO:0006102 | P | 11  | 3.40E-03 | 2.91E-02 |
| 6 | 1579 | F3 vs. L3 | + | Metabolism | Bioenergetics | lipid oxidation                                                                                       | GO:0034440 | P | 35  | 2.45E-03 | 2.26E-02 |
| 6 | 1580 | F3 vs. L3 | + | Metabolism | Bioenergetics | long-chain fatty acid metabolic process                                                               | GO:0001676 | P | 10  | 1.92E-03 | 1.85E-02 |
| 6 | 1581 | F3 vs. L3 | + | Metabolism | Bioenergetics | long-chain fatty acid-CoA ligase activity                                                             | GO:0004467 | F | 9   | 1.80E-03 | 3.39E-02 |
| 6 | 1582 | F3 vs. L3 | + | Metabolism | Bioenergetics | malate metabolic process                                                                              | GO:0006108 | P | 13  | 1.89E-03 | 1.83E-02 |
| 6 | 1583 | F3 vs. L3 | + | Metabolism | Bioenergetics | medium-chain fatty acid-CoA ligase activity                                                           | GO:0031956 | F | 12  | 1.51E-03 | 2.95E-02 |
| 6 | 1584 | F3 vs. L3 | + | Metabolism | Bioenergetics | monosaccharide biosynthetic process                                                                   | GO:0046364 | P | 34  | 5.20E-07 | 1.58E-05 |
| 6 | 1585 | F3 vs. L3 | + | Metabolism | Bioenergetics | NAD binding                                                                                           | GO:0051287 | F | 57  | 1.69E-05 | 7.38E-04 |
| 6 | 1586 | F3 vs. L3 | + | Metabolism | Bioenergetics | NAD(P)H dehydrogenase complex (plastoquinone)                                                         | GO:0010598 | C | 8   | 8.55E-04 | 5.82E-03 |
| 6 | 1587 | F3 vs. L3 | + | Metabolism | Bioenergetics | NAD(P)H dehydrogenase complex assembly                                                                | GO:0010275 | P | 6   | 5.68E-03 | 4.40E-02 |
| 6 | 1588 | F3 vs. L3 | + | Metabolism | Bioenergetics | NADP metabolic process                                                                                | GO:0006739 | P | 38  | 1.17E-05 | 2.25E-04 |
| 6 | 1589 | F3 vs. L3 | + | Metabolism | Bioenergetics | NADPH regeneration                                                                                    | GO:0006740 | P | 30  | 3.69E-05 | 6.39E-04 |
| 6 | 1590 | F3 vs. L3 | + | Metabolism | Bioenergetics | oligosaccharide metabolic process                                                                     | GO:0009311 | P | 65  | 4.19E-03 | 3.43E-02 |
| 6 | 1591 | F3 vs. L3 | + | Metabolism | Bioenergetics | oxidoreductase activity                                                                               | GO:0016491 | F | 891 | 0.00E+00 | 0.00E+00 |
| 6 | 1592 | F3 vs. L3 | + | Metabolism | Bioenergetics | oxidoreductase activity, acting on a sulfur group of donors                                           | GO:0016667 | F | 83  | 5.02E-05 | 1.80E-03 |
| 6 | 1593 | F3 vs. L3 | + | Metabolism | Bioenergetics | oxidoreductase activity, acting on CH-OH group of donors                                              | GO:0016614 | F | 132 | 2.47E-07 | 2.22E-05 |
| 6 | 1594 | F3 vs. L3 | + | Metabolism | Bioenergetics | oxidoreductase activity, acting on NAD(P)H                                                            | GO:0016651 | F | 77  | 8.27E-06 | 4.17E-04 |
| 6 | 1595 | F3 vs. L3 | + | Metabolism | Bioenergetics | oxidoreductase activity, acting on NAD(P)H, quinone or similar compound as acceptor                   | GO:0016655 | F | 30  | 1.96E-03 | 3.61E-02 |
| 6 | 1596 | F3 vs. L3 | + | Metabolism | Bioenergetics | oxidoreductase activity, acting on other nitrogenous compounds as donors                              | GO:0016661 | F | 4   | 2.52E-03 | 4.45E-02 |
| 6 | 1597 | F3 vs. L3 | + | Metabolism | Bioenergetics | oxidoreductase activity, acting on paired donors, with incorporation or reduction of molecular oxygen | GO:0016705 | F | 211 | 2.10E-04 | 5.93E-03 |
| 6 | 1598 | F3 vs. L3 | + | Metabolism | Bioenergetics | oxidoreductase activity, acting on single donors with incorporation of molecular oxygen               | GO:0016701 | F | 32  | 6.45E-04 | 1.52E-02 |
| 6 | 1599 | F3 vs. L3 | + | Metabolism | Bioenergetics | oxidoreductase activity, acting on the aldehyde or oxo group of donors                                | GO:0016903 | F | 45  | 1.07E-04 | 3.31E-03 |
| 6 | 1600 | F3 vs. L3 | + | Metabolism | Bioenergetics | oxidoreductase activity, acting on the aldehyde or oxo group of donors, NAD or NADP as acceptor       | GO:0016620 | F | 32  | 9.56E-05 | 3.06E-03 |
| 6 | 1601 | F3 vs. L3 | + | Metabolism | Bioenergetics | oxidoreductase activity, acting on the CH-NH2 group of donors                                         | GO:0016638 | F | 23  | 2.56E-03 | 4.50E-02 |
| 6 | 1602 | F3 vs. L3 | + | Metabolism | Bioenergetics | oxidoreductase activity, acting on the CH-OH group of donors, NAD or NADP as acceptor                 | GO:0016616 | F | 116 | 1.15E-06 | 7.02E-05 |
| 6 | 1603 | F3 vs. L3 | + | Metabolism | Bioenergetics | oxidoreductase complex                                                                                | GO:1990204 | C | 107 | 1.35E-04 | 1.22E-03 |
| 6 | 1604 | F3 vs. L3 | + | Metabolism | Bioenergetics | pentose-phosphate shunt                                                                               | GO:0006098 | P | 28  | 4.91E-06 | 1.13E-04 |
| 6 | 1605 | F3 vs. L3 | + | Metabolism | Bioenergetics | photorespiration                                                                                      | GO:0009853 | P | 30  | 5.20E-03 | 4.08E-02 |
| 6 | 1606 | F3 vs. L3 | + | Metabolism | Bioenergetics | polysaccharide biosynthetic process                                                                   | GO:0000271 | P | 150 | 1.52E-07 | 5.32E-06 |
| 6 | 1607 | F3 vs. L3 | + | Metabolism | Bioenergetics | polysaccharide metabolic process                                                                      | GO:0005976 | P | 287 | 1.96E-13 | 2.52E-11 |
| 6 | 1608 | F3 vs. L3 | + | Metabolism | Bioenergetics | proton transmembrane transport                                                                        | GO:1902600 | P | 62  | 1.11E-05 | 2.17E-04 |

|   |      |           |   |            |               |                                                             |            |   |     |          |          |
|---|------|-----------|---|------------|---------------|-------------------------------------------------------------|------------|---|-----|----------|----------|
| 6 | 1609 | F3 vs. L3 | + | Metabolism | Bioenergetics | proton-exporting ATPase activity, phosphorylative mechanism | GO:0008553 | F | 15  | 2.28E-04 | 6.31E-03 |
| 6 | 1610 | F3 vs. L3 | + | Metabolism | Bioenergetics | proton-transporting ATPase activity, rotational mechanism   | GO:0046961 | F | 19  | 1.01E-03 | 2.20E-02 |
| 6 | 1611 | F3 vs. L3 | + | Metabolism | Bioenergetics | proton-transporting two-sector ATPase complex               | GO:0016469 | C | 41  | 8.51E-04 | 5.83E-03 |
| 6 | 1612 | F3 vs. L3 | + | Metabolism | Bioenergetics | proton-transporting V-type ATPase complex                   | GO:0033176 | C | 18  | 2.58E-03 | 1.57E-02 |
|   |      |           |   |            |               | pyrophosphate hydrolysis-driven proton transmembrane        |            |   |     |          |          |
| 6 | 1613 | F3 vs. L3 | + | Metabolism | Bioenergetics | transporter activity                                        | GO:0009678 | F | 34  | 2.41E-06 | 1.44E-04 |
| 6 | 1614 | F3 vs. L3 | + | Metabolism | Bioenergetics | pyruvate metabolic process                                  | GO:0006090 | P | 63  | 3.05E-04 | 3.98E-03 |
| 6 | 1615 | F3 vs. L3 | + | Metabolism | Bioenergetics | reductive pentose-phosphate cycle                           | GO:0019253 | P | 14  | 8.82E-06 | 1.82E-04 |
| 6 | 1616 | F3 vs. L3 | + | Metabolism | Bioenergetics | sucrose metabolic process                                   | GO:0005985 | P | 40  | 2.42E-03 | 2.25E-02 |
| 6 | 1617 | F3 vs. L3 | + | Metabolism | Bioenergetics | tricarboxylic acid cycle                                    | GO:0006099 | P | 34  | 2.29E-06 | 5.83E-05 |
| 6 | 1618 | F3 vs. L3 | + | Metabolism | Bioenergetics | tricarboxylic acid metabolic process                        | GO:0072350 | P | 16  | 8.35E-04 | 9.22E-03 |
| 6 | 1619 | F3 vs. L3 | + | Metabolism | Bioenergetics | unsaturated fatty acid biosynthetic process                 | GO:0006636 | P | 16  | 1.20E-03 | 1.26E-02 |
| 6 | 1620 | F3 vs. L3 | + | Metabolism | Bioenergetics | unsaturated fatty acid metabolic process                    | GO:0033559 | P | 17  | 6.42E-04 | 7.54E-03 |
| 6 | 1621 | F3 vs. L3 | + | Metabolism | Catabolism    | alcohol catabolic process                                   | GO:0046164 | P | 23  | 2.52E-04 | 3.35E-03 |
| 6 | 1622 | F3 vs. L3 | + | Metabolism | Catabolism    | alpha-amino acid catabolic process                          | GO:1901606 | P | 66  | 1.77E-11 | 1.56E-09 |
| 6 | 1623 | F3 vs. L3 | + | Metabolism | Catabolism    | aminopeptidase activity                                     | GO:0004177 | F | 16  | 1.02E-03 | 2.19E-02 |
| 6 | 1624 | F3 vs. L3 | + | Metabolism | Catabolism    | aromatic amino acid family catabolic process                | GO:0009074 | P | 16  | 6.21E-07 | 1.80E-05 |
| 6 | 1625 | F3 vs. L3 | + | Metabolism | Catabolism    | aromatic compound catabolic process                         | GO:0019439 | P | 123 | 5.28E-03 | 4.14E-02 |
| 6 | 1626 | F3 vs. L3 | + | Metabolism | Catabolism    | carboxylic acid catabolic process                           | GO:0046395 | P | 115 | 2.07E-13 | 2.55E-11 |
| 6 | 1627 | F3 vs. L3 | + | Metabolism | Catabolism    | catabolic process                                           | GO:0009056 | P | 905 | 2.30E-10 | 1.43E-08 |
| 6 | 1628 | F3 vs. L3 | + | Metabolism | Catabolism    | cell wall macromolecule catabolic process                   | GO:0016998 | P | 18  | 9.30E-04 | 1.01E-02 |
| 6 | 1629 | F3 vs. L3 | + | Metabolism | Catabolism    | cellular amino acid catabolic process                       | GO:0009063 | P | 72  | 5.26E-10 | 3.17E-08 |
| 6 | 1630 | F3 vs. L3 | + | Metabolism | Catabolism    | cellular catabolic process                                  | GO:0044248 | P | 738 | 3.34E-06 | 7.94E-05 |
| 6 | 1631 | F3 vs. L3 | + | Metabolism | Catabolism    | cellular lipid catabolic process                            | GO:0044242 | P | 65  | 7.36E-04 | 8.33E-03 |
| 6 | 1632 | F3 vs. L3 | + | Metabolism | Catabolism    | cellular metabolic compound salvage                         | GO:0043094 | P | 54  | 9.92E-05 | 1.55E-03 |
| 6 | 1633 | F3 vs. L3 | + | Metabolism | Catabolism    | dicarboxylic acid catabolic process                         | GO:0043649 | P | 7   | 3.43E-03 | 2.93E-02 |
|   |      |           |   |            |               | erythrose 4-phosphate/phosphoenolpyruvate family amino acid |            |   |     |          |          |
| 6 | 1634 | F3 vs. L3 | + | Metabolism | Catabolism    | catabolic process                                           | GO:1902222 | P | 10  | 9.06E-06 | 1.85E-04 |
| 6 | 1635 | F3 vs. L3 | + | Metabolism | Catabolism    | glutamine family amino acid catabolic process               | GO:0009065 | P | 10  | 6.21E-03 | 4.70E-02 |
| 6 | 1636 | F3 vs. L3 | + | Metabolism | Catabolism    | glycine catabolic process                                   | GO:0006546 | P | 8   | 5.65E-05 | 9.32E-04 |
| 6 | 1637 | F3 vs. L3 | + | Metabolism | Catabolism    | lipid catabolic process                                     | GO:0016042 | P | 69  | 1.41E-03 | 1.44E-02 |
| 6 | 1638 | F3 vs. L3 | + | Metabolism | Catabolism    | L-phenylalanine catabolic process                           | GO:0006559 | P | 10  | 9.06E-06 | 1.86E-04 |
| 6 | 1639 | F3 vs. L3 | + | Metabolism | Catabolism    | lysosome                                                    | GO:0005764 | C | 35  | 3.91E-04 | 3.22E-03 |
| 6 | 1640 | F3 vs. L3 | + | Metabolism | Catabolism    | monocarboxylic acid catabolic process                       | GO:0072329 | P | 45  | 9.35E-07 | 2.52E-05 |
| 6 | 1641 | F3 vs. L3 | + | Metabolism | Catabolism    | organic acid catabolic process                              | GO:0016054 | P | 115 | 2.07E-13 | 2.61E-11 |
| 6 | 1642 | F3 vs. L3 | + | Metabolism | Catabolism    | organic cyclic compound catabolic process                   | GO:1901361 | P | 131 | 3.59E-03 | 3.01E-02 |
| 6 | 1643 | F3 vs. L3 | + | Metabolism | Catabolism    | organic hydroxy compound catabolic process                  | GO:1901616 | P | 30  | 3.50E-07 | 1.10E-05 |
| 6 | 1644 | F3 vs. L3 | + | Metabolism | Catabolism    | organic substance catabolic process                         | GO:1901575 | P | 839 | 6.03E-09 | 2.96E-07 |
| 6 | 1645 | F3 vs. L3 | + | Metabolism | Catabolism    | pectin catabolic process                                    | GO:0045490 | P | 66  | 9.57E-05 | 1.50E-03 |
| 6 | 1646 | F3 vs. L3 | + | Metabolism | Catabolism    | peroxidase activity                                         | GO:0004601 | F | 62  | 9.99E-05 | 3.16E-03 |
| 6 | 1647 | F3 vs. L3 | + | Metabolism | Catabolism    | peroxisome                                                  | GO:0005777 | C | 203 | 3.01E-05 | 2.99E-04 |
| 6 | 1648 | F3 vs. L3 | + | Metabolism | Catabolism    | phenol-containing compound catabolic process                | GO:0019336 | P | 6   | 2.06E-04 | 2.89E-03 |
| 6 | 1649 | F3 vs. L3 | + | Metabolism | Catabolism    | polyol catabolic process                                    | GO:0046174 | P | 20  | 2.76E-03 | 2.48E-02 |
| 6 | 1650 | F3 vs. L3 | + | Metabolism | Catabolism    | polysaccharide catabolic process                            | GO:0000272 | P | 96  | 1.13E-05 | 2.18E-04 |
| 6 | 1651 | F3 vs. L3 | + | Metabolism | Catabolism    | serine family amino acid catabolic process                  | GO:0009071 | P | 14  | 8.33E-04 | 9.21E-03 |
| 6 | 1652 | F3 vs. L3 | + | Metabolism | Catabolism    | small molecule catabolic process                            | GO:0044282 | P | 168 | 2.55E-15 | 5.06E-13 |
| 6 | 1653 | F3 vs. L3 | + | Metabolism | Catabolism    | tyrosine catabolic process                                  | GO:0006572 | P | 5   | 1.01E-03 | 1.08E-02 |
| 6 | 1654 | F3 vs. L3 | + | Metabolism | Metabolism    | acid-thiol ligase activity                                  | GO:0016878 | F | 28  | 1.45E-05 | 6.72E-04 |
| 6 | 1655 | F3 vs. L3 | + | Metabolism | Metabolism    | actin binding                                               | GO:0003779 | F | 68  | 7.04E-05 | 2.44E-03 |
| 6 | 1656 | F3 vs. L3 | + | Metabolism | Metabolism    | actin filament binding                                      | GO:0051015 | F | 45  | 1.88E-05 | 7.85E-04 |
| 6 | 1657 | F3 vs. L3 | + | Metabolism | Metabolism    | actin filament-based process                                | GO:0030029 | P | 68  | 2.32E-04 | 3.16E-03 |
| 6 | 1658 | F3 vs. L3 | + | Metabolism | Metabolism    | alcohol metabolic process                                   | GO:0006066 | P | 82  | 5.52E-05 | 9.14E-04 |
| 6 | 1659 | F3 vs. L3 | + | Metabolism | Metabolism    | alpha-amino acid biosynthetic process                       | GO:1901607 | P | 122 | 2.94E-08 | 1.20E-06 |
| 6 | 1660 | F3 vs. L3 | + | Metabolism | Metabolism    | alpha-amino acid metabolic process                          | GO:1901605 | P | 195 | 0.00E+00 | 0.00E+00 |
| 6 | 1661 | F3 vs. L3 | + | Metabolism | Metabolism    | amine biosynthetic process                                  | GO:0009309 | P | 24  | 2.46E-03 | 2.26E-02 |
| 6 | 1662 | F3 vs. L3 | + | Metabolism | Metabolism    | amine metabolic process                                     | GO:0009308 | P | 60  | 2.43E-03 | 2.25E-02 |
| 6 | 1663 | F3 vs. L3 | + | Metabolism | Metabolism    | aminoglycan biosynthetic process                            | GO:0006023 | P | 4   | 5.91E-03 | 4.52E-02 |
| 6 | 1664 | F3 vs. L3 | + | Metabolism | Metabolism    | ammonia assimilation cycle                                  | GO:0019676 | P | 6   | 2.32E-03 | 2.17E-02 |
| 6 | 1665 | F3 vs. L3 | + | Metabolism | Metabolism    | anchoring junction                                          | GO:0070161 | C | 610 | 3.07E-03 | 1.80E-02 |
| 6 | 1666 | F3 vs. L3 | + | Metabolism | Metabolism    | anion binding                                               | GO:0043168 | F | 788 | 1.10E-07 | 1.05E-05 |
| 6 | 1667 | F3 vs. L3 | + | Metabolism | Metabolism    | anthocyanin-containing compound metabolic process           | GO:0046283 | P | 12  | 1.85E-03 | 1.81E-02 |
| 6 | 1668 | F3 vs. L3 | + | Metabolism | Metabolism    | aromatic amino acid family metabolic process                | GO:0009072 | P | 51  | 7.92E-06 | 1.69E-04 |
| 6 | 1669 | F3 vs. L3 | + | Metabolism | Metabolism    | aspartate family amino acid metabolic process               | GO:0009066 | P | 46  | 1.91E-04 | 2.70E-03 |
| 6 | 1670 | F3 vs. L3 | + | Metabolism | Metabolism    | benzene-containing compound metabolic process               | GO:0042537 | P | 38  | 2.17E-04 | 2.97E-03 |

|   |      |           |   |            |            |                                                                               |            |   |      |          |          |
|---|------|-----------|---|------------|------------|-------------------------------------------------------------------------------|------------|---|------|----------|----------|
| 6 | 1671 | F3 vs. L3 | + | Metabolism | Metabolism | beta-glucan biosynthetic process                                              | GO:0051274 | P | 51   | 3.28E-04 | 4.25E-03 |
| 6 | 1672 | F3 vs. L3 | + | Metabolism | Metabolism | beta-glucan metabolic process                                                 | GO:0051273 | P | 54   | 1.13E-03 | 1.20E-02 |
| 6 | 1673 | F3 vs. L3 | + | Metabolism | Metabolism | biosynthetic process                                                          | GO:0009058 | P | 1799 | 5.31E-07 | 1.60E-05 |
| 6 | 1674 | F3 vs. L3 | + | Metabolism | Metabolism | camalexin biosynthetic process                                                | GO:0010120 | P | 7    | 2.31E-03 | 2.15E-02 |
| 6 | 1675 | F3 vs. L3 | + | Metabolism | Metabolism | camalexin metabolic process                                                   | GO:0052317 | P | 7    | 2.31E-03 | 2.16E-02 |
| 6 | 1676 | F3 vs. L3 | + | Metabolism | Metabolism | carbon utilization                                                            | GO:0015976 | P | 8    | 1.86E-04 | 2.65E-03 |
| 6 | 1677 | F3 vs. L3 | + | Metabolism | Metabolism | carbon-carbon lyase activity                                                  | GO:0016830 | F | 74   | 5.53E-08 | 6.36E-06 |
| 6 | 1678 | F3 vs. L3 | + | Metabolism | Metabolism | carbon-oxygen lyase activity                                                  | GO:0016835 | F | 97   | 8.79E-07 | 6.16E-05 |
| 6 | 1679 | F3 vs. L3 | + | Metabolism | Metabolism | carboxylic acid biosynthetic process                                          | GO:0046394 | P | 313  | 3.66E-15 | 6.77E-13 |
| 6 | 1680 | F3 vs. L3 | + | Metabolism | Metabolism | carboxylic acid metabolic process                                             | GO:0019752 | P | 636  | 0.00E+00 | 0.00E+00 |
| 6 | 1681 | F3 vs. L3 | + | Metabolism | Metabolism | carboxy-lyase activity                                                        | GO:0016831 | F | 42   | 1.45E-04 | 4.29E-03 |
| 6 | 1682 | F3 vs. L3 | + | Metabolism | Metabolism | catalytic activity                                                            | GO:0003824 | F | 5038 | 0.00E+00 | 0.00E+00 |
| 6 | 1683 | F3 vs. L3 | + | Metabolism | Metabolism | cation binding                                                                | GO:0043169 | F | 973  | 9.55E-15 | 3.43E-12 |
| 6 | 1684 | F3 vs. L3 | + | Metabolism | Metabolism | cell wall macromolecule biosynthetic process                                  | GO:0044038 | P | 53   | 4.61E-03 | 3.67E-02 |
| 6 | 1685 | F3 vs. L3 | + | Metabolism | Metabolism | cell wall macromolecule metabolic process                                     | GO:0044036 | P | 107  | 6.79E-04 | 7.82E-03 |
| 6 | 1686 | F3 vs. L3 | + | Metabolism | Metabolism | cell wall polysaccharide biosynthetic process                                 | GO:0070592 | P | 50   | 5.01E-03 | 3.96E-02 |
| 6 | 1687 | F3 vs. L3 | + | Metabolism | Metabolism | cell wall polysaccharide metabolic process                                    | GO:0010383 | P | 87   | 5.71E-04 | 6.81E-03 |
| 6 | 1688 | F3 vs. L3 | + | Metabolism | Metabolism | cellular amine metabolic process                                              | GO:0044106 | P | 37   | 1.40E-04 | 2.06E-03 |
| 6 | 1689 | F3 vs. L3 | + | Metabolism | Metabolism | cellular amino acid biosynthetic process                                      | GO:0008652 | P | 135  | 2.52E-09 | 1.30E-07 |
| 6 | 1690 | F3 vs. L3 | + | Metabolism | Metabolism | cellular amino acid metabolic process                                         | GO:0006520 | P | 265  | 4.44E-16 | 1.12E-13 |
| 6 | 1691 | F3 vs. L3 | + | Metabolism | Metabolism | cellular biogenic amine biosynthetic process                                  | GO:0042401 | P | 24   | 2.46E-03 | 2.26E-02 |
| 6 | 1692 | F3 vs. L3 | + | Metabolism | Metabolism | cellular biogenic amine metabolic process                                     | GO:0006576 | P | 37   | 1.40E-04 | 2.07E-03 |
| 6 | 1693 | F3 vs. L3 | + | Metabolism | Metabolism | cellular biosynthetic process                                                 | GO:0044249 | P | 1644 | 4.39E-04 | 5.42E-03 |
| 6 | 1694 | F3 vs. L3 | + | Metabolism | Metabolism | cellular component macromolecule biosynthetic process                         | GO:0070589 | P | 53   | 4.61E-03 | 3.68E-02 |
| 6 | 1695 | F3 vs. L3 | + | Metabolism | Metabolism | cellular glucan metabolic process                                             | GO:0006073 | P | 136  | 4.44E-05 | 7.52E-04 |
| 6 | 1696 | F3 vs. L3 | + | Metabolism | Metabolism | cellular lipid metabolic process                                              | GO:0044255 | P | 446  | 4.77E-13 | 5.29E-11 |
| 6 | 1697 | F3 vs. L3 | + | Metabolism | Metabolism | cellular modified amino acid metabolic process                                | GO:0006575 | P | 60   | 1.09E-04 | 1.67E-03 |
| 6 | 1698 | F3 vs. L3 | + | Metabolism | Metabolism | cellulose biosynthetic process                                                | GO:0030244 | P | 39   | 1.46E-04 | 2.15E-03 |
| 6 | 1699 | F3 vs. L3 | + | Metabolism | Metabolism | cellulose metabolic process                                                   | GO:0030243 | P | 42   | 6.95E-04 | 7.98E-03 |
| 6 | 1700 | F3 vs. L3 | + | Metabolism | Metabolism | cellulose synthase (UDP-forming) activity                                     | GO:0016760 | F | 22   | 1.01E-04 | 3.16E-03 |
| 6 | 1701 | F3 vs. L3 | + | Metabolism | Metabolism | cellulose synthase activity                                                   | GO:0016759 | F | 28   | 3.24E-05 | 1.28E-03 |
| 6 | 1702 | F3 vs. L3 | + | Metabolism | Metabolism | cellulose synthase complex                                                    | GO:0010330 | C | 4    | 4.62E-03 | 2.65E-02 |
| 6 | 1703 | F3 vs. L3 | + | Metabolism | Metabolism | copper ion binding                                                            | GO:0005507 | F | 133  | 8.05E-10 | 1.45E-07 |
| 6 | 1704 | F3 vs. L3 | + | Metabolism | Metabolism | coumarin biosynthetic process                                                 | GO:0009805 | P | 4    | 2.22E-03 | 2.08E-02 |
| 6 | 1705 | F3 vs. L3 | + | Metabolism | Metabolism | coumarin metabolic process                                                    | GO:0009804 | P | 5    | 5.39E-04 | 6.48E-03 |
| 6 | 1706 | F3 vs. L3 | + | Metabolism | Metabolism | cysteine metabolic process                                                    | GO:0006534 | P | 18   | 4.89E-03 | 3.87E-02 |
| 6 | 1707 | F3 vs. L3 | + | Metabolism | Metabolism | dicarboxylic acid metabolic process                                           | GO:0043648 | P | 63   | 5.47E-07 | 1.63E-05 |
| 6 | 1708 | F3 vs. L3 | + | Metabolism | Metabolism | endocytosis                                                                   | GO:0006897 | P | 51   | 4.29E-03 | 3.49E-02 |
| 6 | 1709 | F3 vs. L3 | + | Metabolism | Metabolism | erythrose 4-phosphate/phosphoenolpyruvate family amino acid metabolic process | GO:1902221 | P | 19   | 1.90E-05 | 3.50E-04 |
| 6 | 1710 | F3 vs. L3 | + | Metabolism | Metabolism | establishment of localization                                                 | GO:0051234 | P | 1403 | 1.84E-11 | 1.52E-09 |
| 6 | 1711 | F3 vs. L3 | + | Metabolism | Metabolism | exocytosis                                                                    | GO:0006887 | P | 37   | 5.16E-03 | 4.07E-02 |
| 6 | 1712 | F3 vs. L3 | + | Metabolism | Metabolism | flavin adenine dinucleotide binding                                           | GO:0050660 | F | 96   | 2.35E-04 | 6.37E-03 |
| 6 | 1713 | F3 vs. L3 | + | Metabolism | Metabolism | FMN binding                                                                   | GO:0010181 | F | 23   | 6.68E-04 | 1.56E-02 |
| 6 | 1714 | F3 vs. L3 | + | Metabolism | Metabolism | galactolipid metabolic process                                                | GO:0019374 | P | 12   | 6.51E-03 | 4.91E-02 |
| 6 | 1715 | F3 vs. L3 | + | Metabolism | Metabolism | galacturonan metabolic process                                                | GO:0010393 | P | 110  | 1.69E-09 | 9.10E-08 |
| 6 | 1716 | F3 vs. L3 | + | Metabolism | Metabolism | galacturonate metabolic process                                               | GO:0019586 | P | 3    | 5.84E-03 | 4.49E-02 |
| 6 | 1717 | F3 vs. L3 | + | Metabolism | Metabolism | glucan biosynthetic process                                                   | GO:0009250 | P | 86   | 6.95E-04 | 7.99E-03 |
| 6 | 1718 | F3 vs. L3 | + | Metabolism | Metabolism | glucan metabolic process                                                      | GO:0044042 | P | 143  | 2.83E-05 | 5.08E-04 |
| 6 | 1719 | F3 vs. L3 | + | Metabolism | Metabolism | glucosinolate biosynthetic process                                            | GO:0019761 | P | 29   | 7.95E-06 | 1.68E-04 |
| 6 | 1720 | F3 vs. L3 | + | Metabolism | Metabolism | glucosinolate metabolic process                                               | GO:0019760 | P | 68   | 6.27E-05 | 1.02E-03 |
| 6 | 1721 | F3 vs. L3 | + | Metabolism | Metabolism | glucosyltransferase activity                                                  | GO:0046527 | F | 131  | 7.63E-07 | 5.49E-05 |
| 6 | 1722 | F3 vs. L3 | + | Metabolism | Metabolism | glutamate metabolic process                                                   | GO:0006536 | P | 19   | 3.34E-04 | 4.32E-03 |
| 6 | 1723 | F3 vs. L3 | + | Metabolism | Metabolism | glutamine family amino acid metabolic process                                 | GO:0009064 | P | 42   | 6.56E-05 | 1.06E-03 |
| 6 | 1724 | F3 vs. L3 | + | Metabolism | Metabolism | glutamine metabolic process                                                   | GO:0006541 | P | 14   | 1.03E-03 | 1.11E-02 |
| 6 | 1725 | F3 vs. L3 | + | Metabolism | Metabolism | glycerolipid metabolic process                                                | GO:0046486 | P | 121  | 1.79E-03 | 1.77E-02 |
| 6 | 1726 | F3 vs. L3 | + | Metabolism | Metabolism | glycerophospholipid metabolic process                                         | GO:0006650 | P | 104  | 3.55E-03 | 2.99E-02 |
| 6 | 1727 | F3 vs. L3 | + | Metabolism | Metabolism | glycine biosynthetic process                                                  | GO:0006545 | P | 9    | 6.01E-03 | 4.58E-02 |
| 6 | 1728 | F3 vs. L3 | + | Metabolism | Metabolism | glycine cleavage complex                                                      | GO:0005960 | C | 5    | 1.58E-03 | 1.02E-02 |
| 6 | 1729 | F3 vs. L3 | + | Metabolism | Metabolism | glycine decarboxylation via glycine cleavage system                           | GO:0019464 | P | 7    | 1.79E-04 | 2.57E-03 |
| 6 | 1730 | F3 vs. L3 | + | Metabolism | Metabolism | glycine metabolic process                                                     | GO:0006544 | P | 16   | 4.57E-06 | 1.06E-04 |
| 6 | 1731 | F3 vs. L3 | + | Metabolism | Metabolism | glycosaminoglycan biosynthetic process                                        | GO:0006024 | P | 4    | 5.91E-03 | 4.52E-02 |
| 6 | 1732 | F3 vs. L3 | + | Metabolism | Metabolism | glycosaminoglycan metabolic process                                           | GO:0030203 | P | 4    | 5.91E-03 | 4.53E-02 |
| 6 | 1733 | F3 vs. L3 | + | Metabolism | Metabolism | glucosinolate biosynthetic process                                            | GO:0019758 | P | 29   | 7.95E-06 | 1.68E-04 |



|   |      |           |   |            |            |                                                      |            |   |      |          |          |
|---|------|-----------|---|------------|------------|------------------------------------------------------|------------|---|------|----------|----------|
| 6 | 1734 | F3 vs. L3 | + | Metabolism | Metabolism | glycosinolate metabolic process                      | GO:0019757 | P | 68   | 6.27E-05 | 1.02E-03 |
| 6 | 1735 | F3 vs. L3 | + | Metabolism | Metabolism | glycosyl compound biosynthetic process               | GO:1901659 | P | 47   | 6.39E-05 | 1.04E-03 |
| 6 | 1736 | F3 vs. L3 | + | Metabolism | Metabolism | glycosyl compound metabolic process                  | GO:1901657 | P | 118  | 3.44E-04 | 4.41E-03 |
| 6 | 1737 | F3 vs. L3 | + | Metabolism | Metabolism | heme binding                                         | GO:0020037 | F | 196  | 8.48E-06 | 4.21E-04 |
| 6 | 1738 | F3 vs. L3 | + | Metabolism | Metabolism | hydrocarbon biosynthetic process                     | GO:0120251 | P | 35   | 2.90E-03 | 2.58E-02 |
| 6 | 1739 | F3 vs. L3 | + | Metabolism | Metabolism | hydrolase activity                                   | GO:0016787 | F | 1794 | 1.05E-05 | 5.06E-04 |
| 6 | 1740 | F3 vs. L3 | + | Metabolism | Metabolism | hydrolase activity, acting on glycosyl bonds         | GO:0016798 | F | 297  | 1.77E-04 | 5.10E-03 |
| 6 | 1741 | F3 vs. L3 | + | Metabolism | Metabolism | hydrolase activity, hydrolyzing O-glycosyl compounds | GO:0004553 | F | 232  | 4.03E-07 | 3.22E-05 |
| 6 | 1742 | F3 vs. L3 | + | Metabolism | Metabolism | hydro-lyase activity                                 | GO:0016836 | F | 64   | 2.45E-05 | 9.77E-04 |
| 6 | 1743 | F3 vs. L3 | + | Metabolism | Metabolism | indole phytoalexin biosynthetic process              | GO:0009700 | P | 9    | 1.78E-03 | 1.77E-02 |
| 6 | 1744 | F3 vs. L3 | + | Metabolism | Metabolism | indole-containing compound biosynthetic process      | GO:0042435 | P | 31   | 3.78E-03 | 3.15E-02 |
| 6 | 1745 | F3 vs. L3 | + | Metabolism | Metabolism | indole-containing compound metabolic process         | GO:0042430 | P | 49   | 1.84E-04 | 2.63E-03 |
| 6 | 1746 | F3 vs. L3 | + | Metabolism | Metabolism | inorganic diphosphatase activity                     | GO:0004427 | F | 10   | 9.28E-04 | 2.10E-02 |
| 6 | 1747 | F3 vs. L3 | + | Metabolism | Metabolism | inositol phosphate metabolic process                 | GO:0043647 | P | 23   | 3.50E-03 | 2.97E-02 |
| 6 | 1748 | F3 vs. L3 | + | Metabolism | Metabolism | ion binding                                          | GO:0043167 | F | 1653 | 7.77E-16 | 3.73E-13 |
| 6 | 1749 | F3 vs. L3 | + | Metabolism | Metabolism | iron ion binding                                     | GO:0005506 | F | 178  | 1.87E-04 | 5.33E-03 |
| 6 | 1750 | F3 vs. L3 | + | Metabolism | Metabolism | leucine biosynthetic process                         | GO:0009098 | P | 12   | 1.93E-03 | 1.86E-02 |
| 6 | 1751 | F3 vs. L3 | + | Metabolism | Metabolism | ligase activity, forming carbon-sulfur bonds         | GO:0016877 | F | 38   | 1.13E-03 | 2.32E-02 |
| 6 | 1752 | F3 vs. L3 | + | Metabolism | Metabolism | lignin biosynthetic process                          | GO:0009809 | P | 29   | 1.91E-05 | 3.51E-04 |
| 6 | 1753 | F3 vs. L3 | + | Metabolism | Metabolism | lignin metabolic process                             | GO:0009808 | P | 39   | 5.83E-06 | 1.31E-04 |
| 6 | 1754 | F3 vs. L3 | + | Metabolism | Metabolism | lipid biosynthetic process                           | GO:0008610 | P | 328  | 5.45E-07 | 1.63E-05 |
| 6 | 1755 | F3 vs. L3 | + | Metabolism | Metabolism | lipid localization                                   | GO:0010876 | P | 80   | 1.86E-03 | 1.82E-02 |
| 6 | 1756 | F3 vs. L3 | + | Metabolism | Metabolism | lipid metabolic process                              | GO:0006629 | P | 536  | 1.03E-11 | 9.38E-10 |
| 6 | 1757 | F3 vs. L3 | + | Metabolism | Metabolism | lipid modification                                   | GO:0030258 | P | 74   | 1.29E-05 | 2.47E-04 |
| 6 | 1758 | F3 vs. L3 | + | Metabolism | Metabolism | localization                                         | GO:0051179 | P | 1509 | 9.51E-11 | 6.43E-09 |
| 6 | 1759 | F3 vs. L3 | + | Metabolism | Metabolism | L-phenylalanine metabolic process                    | GO:0006558 | P | 19   | 1.90E-05 | 3.52E-04 |
| 6 | 1760 | F3 vs. L3 | + | Metabolism | Metabolism | L-serine metabolic process                           | GO:0006563 | P | 19   | 4.89E-04 | 6.01E-03 |
| 6 | 1761 | F3 vs. L3 | + | Metabolism | Metabolism | lyase activity                                       | GO:0016829 | F | 209  | 2.72E-14 | 7.83E-12 |
| 6 | 1762 | F3 vs. L3 | + | Metabolism | Metabolism | magnesium ion binding                                | GO:0000287 | F | 69   | 1.71E-04 | 4.96E-03 |
| 6 | 1763 | F3 vs. L3 | + | Metabolism | Metabolism | membrane lipid metabolic process                     | GO:0006643 | P | 67   | 4.23E-03 | 3.46E-02 |
| 6 | 1764 | F3 vs. L3 | + | Metabolism | Metabolism | metabolic process                                    | GO:0008152 | P | 5278 | 1.73E-03 | 1.74E-02 |
| 6 | 1765 | F3 vs. L3 | + | Metabolism | Metabolism | metal ion binding                                    | GO:0046872 | F | 956  | 3.35E-14 | 8.77E-12 |
| 6 | 1766 | F3 vs. L3 | + | Metabolism | Metabolism | methionine adenosyltransferase activity              | GO:0004478 | F | 4    | 1.50E-03 | 2.96E-02 |
| 6 | 1767 | F3 vs. L3 | + | Metabolism | Metabolism | methionine metabolic process                         | GO:0006555 | P | 19   | 1.48E-03 | 1.51E-02 |
| 6 | 1768 | F3 vs. L3 | + | Metabolism | Metabolism | monocarboxylic acid biosynthetic process             | GO:0072330 | P | 148  | 2.35E-06 | 5.95E-05 |
| 6 | 1769 | F3 vs. L3 | + | Metabolism | Metabolism | monocarboxylic acid metabolic process                | GO:0032787 | P | 325  | 9.77E-15 | 1.55E-12 |
| 6 | 1770 | F3 vs. L3 | + | Metabolism | Metabolism | monooxygenase activity                               | GO:0004497 | F | 135  | 1.69E-03 | 3.27E-02 |
| 6 | 1771 | F3 vs. L3 | + | Metabolism | Metabolism | monosaccharide metabolic process                     | GO:0005996 | P | 94   | 1.38E-05 | 2.64E-04 |
| 6 | 1772 | F3 vs. L3 | + | Metabolism | Metabolism | nitrate assimilation                                 | GO:0042128 | P | 11   | 2.08E-04 | 2.91E-03 |
| 6 | 1773 | F3 vs. L3 | + | Metabolism | Metabolism | nitrate metabolic process                            | GO:0042126 | P | 11   | 2.08E-04 | 2.90E-03 |
| 6 | 1774 | F3 vs. L3 | + | Metabolism | Metabolism | nitrogen cycle metabolic process                     | GO:0071941 | P | 14   | 8.05E-05 | 1.29E-03 |
| 6 | 1775 | F3 vs. L3 | + | Metabolism | Metabolism | olefinic compound metabolic process                  | GO:0120254 | P | 36   | 2.46E-03 | 2.26E-02 |
| 6 | 1776 | F3 vs. L3 | + | Metabolism | Metabolism | oligopeptide binding                                 | GO:1900750 | F | 11   | 4.76E-05 | 1.73E-03 |
| 6 | 1777 | F3 vs. L3 | + | Metabolism | Metabolism | organic acid biosynthetic process                    | GO:0016053 | P | 313  | 3.66E-15 | 7.00E-13 |
| 6 | 1778 | F3 vs. L3 | + | Metabolism | Metabolism | organic acid metabolic process                       | GO:0006082 | P | 700  | 0.00E+00 | 0.00E+00 |
| 6 | 1779 | F3 vs. L3 | + | Metabolism | Metabolism | organic cyclic compound biosynthetic process         | GO:1901362 | P | 573  | 5.29E-03 | 4.14E-02 |
| 6 | 1780 | F3 vs. L3 | + | Metabolism | Metabolism | organic hydroxy compound biosynthetic process        | GO:1901617 | P | 112  | 1.69E-04 | 2.45E-03 |
| 6 | 1781 | F3 vs. L3 | + | Metabolism | Metabolism | organic hydroxy compound metabolic process           | GO:1901615 | P | 195  | 3.84E-08 | 1.53E-06 |
| 6 | 1782 | F3 vs. L3 | + | Metabolism | Metabolism | organic substance biosynthetic process               | GO:1901576 | P | 1716 | 2.46E-05 | 4.47E-04 |
| 6 | 1783 | F3 vs. L3 | + | Metabolism | Metabolism | organophosphate metabolic process                    | GO:0019637 | P | 398  | 2.85E-08 | 1.18E-06 |
| 6 | 1784 | F3 vs. L3 | + | Metabolism | Metabolism | oxidation-reduction process                          | GO:0055114 | P | 492  | 0.00E+00 | 0.00E+00 |
| 6 | 1785 | F3 vs. L3 | + | Metabolism | Metabolism | oxoacid metabolic process                            | GO:0043436 | P | 698  | 0.00E+00 | 0.00E+00 |
| 6 | 1786 | F3 vs. L3 | + | Metabolism | Metabolism | oxylipin biosynthetic process                        | GO:0031408 | P | 12   | 8.46E-05 | 1.34E-03 |
| 6 | 1787 | F3 vs. L3 | + | Metabolism | Metabolism | oxylipin metabolic process                           | GO:0031407 | P | 14   | 1.28E-04 | 1.93E-03 |
| 6 | 1788 | F3 vs. L3 | + | Metabolism | Metabolism | pectate lyase activity                               | GO:0030570 | F | 16   | 8.75E-04 | 2.00E-02 |
| 6 | 1789 | F3 vs. L3 | + | Metabolism | Metabolism | pectin biosynthetic process                          | GO:0045489 | P | 37   | 2.53E-04 | 3.36E-03 |
| 6 | 1790 | F3 vs. L3 | + | Metabolism | Metabolism | pectin metabolic process                             | GO:0045488 | P | 109  | 7.09E-10 | 4.05E-08 |
| 6 | 1791 | F3 vs. L3 | + | Metabolism | Metabolism | pectinesterase activity                              | GO:0030599 | F | 57   | 2.26E-03 | 4.06E-02 |
| 6 | 1792 | F3 vs. L3 | + | Metabolism | Metabolism | phenylpropanoid biosynthetic process                 | GO:0009699 | P | 56   | 6.99E-06 | 1.54E-04 |
| 6 | 1793 | F3 vs. L3 | + | Metabolism | Metabolism | phenylpropanoid metabolic process                    | GO:0009698 | P | 73   | 6.52E-07 | 1.86E-05 |
| 6 | 1794 | F3 vs. L3 | + | Metabolism | Metabolism | phosphate-containing compound metabolic process      | GO:0006796 | P | 1144 | 9.12E-06 | 1.86E-04 |
| 6 | 1795 | F3 vs. L3 | + | Metabolism | Metabolism | phospholipid metabolic process                       | GO:0006644 | P | 144  | 1.59E-03 | 1.61E-02 |
| 6 | 1796 | F3 vs. L3 | + | Metabolism | Metabolism | phosphorus metabolic process                         | GO:0006793 | P | 1176 | 2.09E-07 | 6.98E-06 |
| 6 | 1797 | F3 vs. L3 | + | Metabolism | Metabolism | pigment metabolic process                            | GO:0042440 | P | 89   | 2.04E-03 | 1.96E-02 |

|   |      |           |   |            |                |                                                                             |            |   |      |          |          |
|---|------|-----------|---|------------|----------------|-----------------------------------------------------------------------------|------------|---|------|----------|----------|
| 6 | 1798 | F3 vs. L3 | + | Metabolism | Metabolism     | polygalacturonase activity                                                  | GO:0004650 | F | 35   | 2.69E-03 | 4.66E-02 |
| 6 | 1799 | F3 vs. L3 | + | Metabolism | Metabolism     | polyol metabolic process                                                    | GO:0019751 | P | 41   | 1.09E-04 | 1.67E-03 |
| 6 | 1800 | F3 vs. L3 | + | Metabolism | Metabolism     | proton export across plasma membrane                                        | GO:0120029 | P | 8    | 2.75E-03 | 2.47E-02 |
| 6 | 1801 | F3 vs. L3 | + | Metabolism | Metabolism     | purine nucleoside diphosphate metabolic process                             | GO:0009135 | P | 43   | 3.14E-03 | 2.74E-02 |
| 6 | 1802 | F3 vs. L3 | + | Metabolism | Metabolism     | purine nucleotide metabolic process                                         | GO:0006163 | P | 144  | 1.76E-03 | 1.76E-02 |
| 6 | 1803 | F3 vs. L3 | + | Metabolism | Metabolism     | purine ribonucleoside diphosphate metabolic process                         | GO:0009179 | P | 43   | 3.14E-03 | 2.75E-02 |
| 6 | 1804 | F3 vs. L3 | + | Metabolism | Metabolism     | purine ribonucleotide metabolic process                                     | GO:0009150 | P | 136  | 6.18E-04 | 7.28E-03 |
| 6 | 1805 | F3 vs. L3 | + | Metabolism | Metabolism     | purine-containing compound metabolic process                                | GO:0072521 | P | 163  | 2.86E-03 | 2.55E-02 |
| 6 | 1806 | F3 vs. L3 | + | Metabolism | Metabolism     | pyridoxal phosphate binding                                                 | GO:0030170 | F | 71   | 6.90E-08 | 7.35E-06 |
| 6 | 1807 | F3 vs. L3 | + | Metabolism | Metabolism     | quercetin 7-O-glucosyltransferase activity                                  | GO:0080044 | F | 33   | 5.39E-04 | 1.32E-02 |
| 6 | 1808 | F3 vs. L3 | + | Metabolism | Metabolism     | racemase and epimerase activity                                             | GO:0016854 | F | 33   | 1.17E-03 | 2.38E-02 |
| 6 | 1809 | F3 vs. L3 | + | Metabolism | Metabolism     | S-adenosylmethionine biosynthetic process                                   | GO:0006556 | P | 4    | 1.50E-03 | 1.53E-02 |
| 6 | 1810 | F3 vs. L3 | + | Metabolism | Metabolism     | S-adenosylmethionine metabolic process                                      | GO:0046500 | P | 8    | 1.35E-04 | 2.02E-03 |
| 6 | 1811 | F3 vs. L3 | + | Metabolism | Metabolism     | secondary alcohol metabolic process                                         | GO:1902652 | P | 11   | 3.40E-03 | 2.91E-02 |
| 6 | 1812 | F3 vs. L3 | + | Metabolism | Metabolism     | secondary metabolic process                                                 | GO:0019748 | P | 185  | 4.38E-11 | 3.33E-09 |
| 6 | 1813 | F3 vs. L3 | + | Metabolism | Metabolism     | secondary metabolite biosynthetic process                                   | GO:0044550 | P | 97   | 1.31E-10 | 8.64E-09 |
| 6 | 1814 | F3 vs. L3 | + | Metabolism | Metabolism     | serine family amino acid biosynthetic process                               | GO:0009070 | P | 31   | 8.80E-06 | 1.82E-04 |
| 6 | 1815 | F3 vs. L3 | + | Metabolism | Metabolism     | serine family amino acid metabolic process                                  | GO:0009069 | P | 44   | 1.52E-08 | 6.78E-07 |
| 6 | 1816 | F3 vs. L3 | + | Metabolism | Metabolism     | S-glycoside biosynthetic process                                            | GO:0016144 | P | 29   | 7.95E-06 | 1.69E-04 |
| 6 | 1817 | F3 vs. L3 | + | Metabolism | Metabolism     | S-glycoside metabolic process                                               | GO:0016143 | P | 68   | 6.27E-05 | 1.03E-03 |
| 6 | 1818 | F3 vs. L3 | + | Metabolism | Metabolism     | small molecule binding                                                      | GO:0036094 | F | 785  | 1.56E-07 | 1.45E-05 |
| 6 | 1819 | F3 vs. L3 | + | Metabolism | Metabolism     | small molecule biosynthetic process                                         | GO:0044283 | P | 436  | 0.00E+00 | 0.00E+00 |
| 6 | 1820 | F3 vs. L3 | + | Metabolism | Metabolism     | small molecule metabolic process                                            | GO:0044281 | P | 1034 | 0.00E+00 | 0.00E+00 |
| 6 | 1821 | F3 vs. L3 | + | Metabolism | Metabolism     | sphingolipid metabolic process                                              | GO:0006665 | P | 28   | 7.37E-04 | 8.32E-03 |
| 6 | 1822 | F3 vs. L3 | + | Metabolism | Metabolism     | sulfur amino acid biosynthetic process                                      | GO:0000097 | P | 26   | 3.90E-04 | 4.90E-03 |
| 6 | 1823 | F3 vs. L3 | + | Metabolism | Metabolism     | sulfur amino acid metabolic process                                         | GO:0000096 | P | 39   | 9.94E-06 | 1.99E-04 |
| 6 | 1824 | F3 vs. L3 | + | Metabolism | Metabolism     | sulfur compound binding                                                     | GO:1901681 | F | 26   | 7.94E-06 | 4.08E-04 |
| 6 | 1825 | F3 vs. L3 | + | Metabolism | Metabolism     | sulfur compound biosynthetic process                                        | GO:0044272 | P | 104  | 1.67E-15 | 3.42E-13 |
| 6 | 1826 | F3 vs. L3 | + | Metabolism | Metabolism     | sulfur compound metabolic process                                           | GO:0006790 | P | 238  | 0.00E+00 | 0.00E+00 |
| 6 | 1827 | F3 vs. L3 | + | Metabolism | Metabolism     | terpenoid metabolic process                                                 | GO:0006721 | P | 90   | 6.48E-03 | 4.89E-02 |
| 6 | 1828 | F3 vs. L3 | + | Metabolism | Metabolism     | tetrapyrrole binding                                                        | GO:0046906 | F | 221  | 1.47E-05 | 6.59E-04 |
| 6 | 1829 | F3 vs. L3 | + | Metabolism | Metabolism     | transaminase activity                                                       | GO:0008483 | F | 39   | 2.22E-03 | 4.02E-02 |
| 6 | 1830 | F3 vs. L3 | + | Metabolism | Metabolism     | transferase activity                                                        | GO:0016740 | F | 1999 | 5.64E-05 | 2.00E-03 |
| 6 | 1831 | F3 vs. L3 | + | Metabolism | Metabolism     | transferase activity, transferring alkyl or aryl (other than methyl) groups | GO:0016765 | F | 85   | 1.50E-05 | 6.63E-04 |
| 6 | 1832 | F3 vs. L3 | + | Metabolism | Metabolism     | transferase activity, transferring glycosyl groups                          | GO:0016757 | F | 367  | 1.85E-05 | 7.96E-04 |
| 6 | 1833 | F3 vs. L3 | + | Metabolism | Metabolism     | transferase activity, transferring hexosyl groups                           | GO:0016758 | F | 235  | 1.46E-05 | 6.69E-04 |
| 6 | 1834 | F3 vs. L3 | + | Metabolism | Metabolism     | transferase activity, transferring nitrogenous groups                       | GO:0016769 | F | 40   | 1.10E-03 | 2.32E-02 |
| 6 | 1835 | F3 vs. L3 | + | Metabolism | Metabolism     | transition metal ion binding                                                | GO:0046914 | F | 701  | 8.95E-07 | 6.13E-05 |
| 6 | 1836 | F3 vs. L3 | + | Metabolism | Metabolism     | UDP-glucosyltransferase activity                                            | GO:0035251 | F | 102  | 1.11E-06 | 7.07E-05 |
| 6 | 1837 | F3 vs. L3 | + | Metabolism | Metabolism     | UDP-glucuronate biosynthetic process                                        | GO:0006065 | P | 4    | 5.91E-03 | 4.53E-02 |
| 6 | 1838 | F3 vs. L3 | + | Metabolism | Metabolism     | UDP-glucuronate metabolic process                                           | GO:0046398 | P | 5    | 3.16E-03 | 2.75E-02 |
| 6 | 1839 | F3 vs. L3 | + | Metabolism | Metabolism     | UDP-glycosyltransferase activity                                            | GO:0008194 | F | 188  | 9.72E-09 | 1.33E-06 |
| 6 | 1840 | F3 vs. L3 | + | Metabolism | Metabolism     | UDP-L-arabinose metabolic process                                           | GO:0033356 | P | 9    | 1.29E-03 | 1.33E-02 |
| 6 | 1841 | F3 vs. L3 | + | Metabolism | Metabolism     | UDP-rhamnose biosynthetic process                                           | GO:0010253 | P | 4    | 3.92E-03 | 3.24E-02 |
| 6 | 1842 | F3 vs. L3 | + | Metabolism | Metabolism     | UDP-rhamnose metabolic process                                              | GO:0033478 | P | 4    | 3.92E-03 | 3.25E-02 |
| 6 | 1843 | F3 vs. L3 | + | Metabolism | Metabolism     | uronic acid metabolic process                                               | GO:0006063 | P | 3    | 5.84E-03 | 4.49E-02 |
| 6 | 1844 | F3 vs. L3 | + | Metabolism | Metabolism     | vitamin B6 binding                                                          | GO:0070279 | F | 71   | 6.90E-08 | 7.63E-06 |
| 6 | 1845 | F3 vs. L3 | + | Metabolism | Metabolism     | vitamin binding                                                             | GO:0019842 | F | 94   | 4.01E-07 | 3.30E-05 |
| 6 | 1846 | F3 vs. L3 | + | Metabolism | Photosynthesis | carbon fixation                                                             | GO:0015977 | P | 15   | 9.51E-06 | 1.92E-04 |
| 6 | 1847 | F3 vs. L3 | + | Metabolism | Photosynthesis | chloroplast                                                                 | GO:0009507 | C | 3000 | 3.33E-16 | 1.62E-14 |
| 6 | 1848 | F3 vs. L3 | + | Metabolism | Photosynthesis | chloroplast avoidance movement                                              | GO:0009903 | P | 17   | 6.56E-03 | 4.94E-02 |
| 6 | 1849 | F3 vs. L3 | + | Metabolism | Photosynthesis | chloroplast envelope                                                        | GO:0009941 | C | 442  | 1.89E-15 | 7.98E-14 |
| 6 | 1850 | F3 vs. L3 | + | Metabolism | Photosynthesis | chloroplast localization                                                    | GO:0019750 | P | 21   | 4.42E-03 | 3.55E-02 |
| 6 | 1851 | F3 vs. L3 | + | Metabolism | Photosynthesis | chloroplast relocation                                                      | GO:0009902 | P | 20   | 1.15E-03 | 1.21E-02 |
| 6 | 1852 | F3 vs. L3 | + | Metabolism | Photosynthesis | chloroplast stroma                                                          | GO:0009570 | C | 538  | 0.00E+00 | 0.00E+00 |
| 6 | 1853 | F3 vs. L3 | + | Metabolism | Photosynthesis | chloroplast thylakoid                                                       | GO:0009534 | C | 318  | 8.33E-12 | 2.46E-10 |
| 6 | 1854 | F3 vs. L3 | + | Metabolism | Photosynthesis | chloroplast thylakoid membrane                                              | GO:0009535 | C | 259  | 8.47E-10 | 1.75E-08 |
| 6 | 1855 | F3 vs. L3 | + | Metabolism | Photosynthesis | establishment of plastid localization                                       | GO:0051667 | P | 20   | 1.15E-03 | 1.22E-02 |
| 6 | 1856 | F3 vs. L3 | + | Metabolism | Photosynthesis | fructose 1,6-bisphosphate metabolic process                                 | GO:0030388 | P | 11   | 1.22E-03 | 1.27E-02 |
| 6 | 1857 | F3 vs. L3 | + | Metabolism | Photosynthesis | fructose-bisphosphate aldolase activity                                     | GO:0004332 | F | 7    | 6.19E-04 | 1.47E-02 |
| 6 | 1858 | F3 vs. L3 | + | Metabolism | Photosynthesis | photosynthesis                                                              | GO:0015979 | P | 136  | 8.52E-10 | 4.77E-08 |
| 6 | 1859 | F3 vs. L3 | + | Metabolism | Photosynthesis | photosynthesis, dark reaction                                               | GO:0019685 | P | 15   | 3.39E-06 | 8.03E-05 |
| 6 | 1860 | F3 vs. L3 | + | Metabolism | Photosynthesis | photosynthesis, light reaction                                              | GO:0019684 | P | 89   | 1.44E-05 | 2.75E-04 |

|   |      |           |   |            |                |                                                                |            |   |      |          |          |
|---|------|-----------|---|------------|----------------|----------------------------------------------------------------|------------|---|------|----------|----------|
| 6 | 1861 | F3 vs. L3 | + | Metabolism | Photosynthesis | photosynthetic membrane                                        | GO:0034357 | C | 283  | 2.38E-10 | 5.65E-09 |
| 6 | 1862 | F3 vs. L3 | + | Metabolism | Photosynthesis | plastid                                                        | GO:0009536 | C | 3297 | 2.22E-16 | 1.27E-14 |
| 6 | 1863 | F3 vs. L3 | + | Metabolism | Photosynthesis | plastid envelope                                               | GO:0009526 | C | 460  | 8.88E-16 | 3.93E-14 |
| 6 | 1864 | F3 vs. L3 | + | Metabolism | Photosynthesis | plastid localization                                           | GO:0051644 | P | 21   | 4.42E-03 | 3.55E-02 |
| 6 | 1865 | F3 vs. L3 | + | Metabolism | Photosynthesis | plastid stroma                                                 | GO:0009532 | C | 545  | 0.00E+00 | 0.00E+00 |
| 6 | 1866 | F3 vs. L3 | + | Metabolism | Photosynthesis | plastid thylakoid                                              | GO:0031976 | C | 320  | 4.18E-12 | 1.31E-10 |
| 6 | 1867 | F3 vs. L3 | + | Metabolism | Photosynthesis | plastid thylakoid membrane                                     | GO:0055035 | C | 262  | 4.55E-10 | 9.84E-09 |
| 6 | 1868 | F3 vs. L3 | + | Metabolism | Photosynthesis | plastoglobule                                                  | GO:0010287 | C | 60   | 1.17E-03 | 7.72E-03 |
| 6 | 1869 | F3 vs. L3 | + | Metabolism | Photosynthesis | thylakoid                                                      | GO:0009579 | C | 389  | 6.00E-15 | 2.43E-13 |
| 6 | 1870 | F3 vs. L3 | + | Metabolism | Photosynthesis | thylakoid lumen                                                | GO:0031977 | C | 47   | 7.63E-04 | 5.38E-03 |
| 6 | 1871 | F3 vs. L3 | + | Metabolism | Photosynthesis | thylakoid membrane                                             | GO:0042651 | C | 280  | 1.22E-10 | 3.12E-09 |
| 6 | 1872 | F3 vs. L3 | + | Metabolism | Transporters   | active ion transmembrane transporter activity                  | GO:0022853 | F | 149  | 1.45E-10 | 2.78E-08 |
| 6 | 1873 | F3 vs. L3 | + | Metabolism | Transporters   | active transmembrane transporter activity                      | GO:0022804 | F | 316  | 1.67E-14 | 5.32E-12 |
| 6 | 1874 | F3 vs. L3 | + | Metabolism | Transporters   | amino acid transmembrane transport                             | GO:0003333 | P | 21   | 3.87E-03 | 3.22E-02 |
| 6 | 1875 | F3 vs. L3 | + | Metabolism | Transporters   | amino acid transmembrane transporter activity                  | GO:0015171 | F | 59   | 2.59E-04 | 6.97E-03 |
| 6 | 1876 | F3 vs. L3 | + | Metabolism | Transporters   | amino acid transport                                           | GO:0006865 | P | 37   | 5.77E-03 | 4.46E-02 |
| 6 | 1877 | F3 vs. L3 | + | Metabolism | Transporters   | anion transmembrane transport                                  | GO:0098656 | P | 73   | 5.30E-04 | 6.40E-03 |
| 6 | 1878 | F3 vs. L3 | + | Metabolism | Transporters   | anion transmembrane transporter activity                       | GO:0008509 | F | 235  | 4.04E-07 | 3.14E-05 |
| 6 | 1879 | F3 vs. L3 | + | Metabolism | Transporters   | anion transport                                                | GO:0006820 | P | 171  | 2.92E-08 | 1.20E-06 |
| 6 | 1880 | F3 vs. L3 | + | Metabolism | Transporters   | antiporter activity                                            | GO:0015297 | F | 135  | 5.07E-08 | 6.08E-06 |
| 6 | 1881 | F3 vs. L3 | + | Metabolism | Transporters   | ATPase-coupled cation transmembrane transporter activity       | GO:0019829 | F | 47   | 3.17E-07 | 2.76E-05 |
| 6 | 1882 | F3 vs. L3 | + | Metabolism | Transporters   | ATPase-coupled ion transmembrane transporter activity          | GO:0042625 | F | 53   | 3.17E-07 | 2.69E-05 |
| 6 | 1883 | F3 vs. L3 | + | Metabolism | Transporters   | ATPase-coupled transmembrane transporter activity              | GO:0042626 | F | 124  | 5.46E-07 | 4.03E-05 |
| 6 | 1884 | F3 vs. L3 | + | Metabolism | Transporters   | calcium ion transmembrane transport                            | GO:0070588 | P | 26   | 1.89E-03 | 1.83E-02 |
| 6 | 1885 | F3 vs. L3 | + | Metabolism | Transporters   | carbohydrate transmembrane transporter activity                | GO:0015144 | F | 65   | 6.06E-04 | 1.48E-02 |
| 6 | 1886 | F3 vs. L3 | + | Metabolism | Transporters   | carbohydrate transport                                         | GO:0008643 | P | 40   | 3.02E-03 | 2.66E-02 |
| 6 | 1887 | F3 vs. L3 | + | Metabolism | Transporters   | carboxylic acid transmembrane transport                        | GO:1905039 | P | 40   | 4.13E-03 | 3.39E-02 |
| 6 | 1888 | F3 vs. L3 | + | Metabolism | Transporters   | carboxylic acid transmembrane transporter activity             | GO:0046943 | F | 93   | 7.32E-05 | 2.51E-03 |
| 6 | 1889 | F3 vs. L3 | + | Metabolism | Transporters   | carboxylic acid transport                                      | GO:0046942 | P | 78   | 4.32E-03 | 3.50E-02 |
| 6 | 1890 | F3 vs. L3 | + | Metabolism | Transporters   | cation transmembrane transport                                 | GO:0098655 | P | 148  | 6.87E-07 | 1.93E-05 |
| 6 | 1891 | F3 vs. L3 | + | Metabolism | Transporters   | cation transmembrane transporter activity                      | GO:0008324 | F | 270  | 2.17E-08 | 2.72E-06 |
| 6 | 1892 | F3 vs. L3 | + | Metabolism | Transporters   | cation transport                                               | GO:0006812 | P | 252  | 4.37E-07 | 1.35E-05 |
| 6 | 1893 | F3 vs. L3 | + | Metabolism | Transporters   | chemotaxis                                                     | GO:0006935 | P | 23   | 6.43E-04 | 7.47E-03 |
| 6 | 1894 | F3 vs. L3 | + | Metabolism | Transporters   | cytoplasmic vesicle                                            | GO:0031410 | C | 488  | 1.75E-08 | 2.99E-07 |
| 6 | 1895 | F3 vs. L3 | + | Metabolism | Transporters   | dicarboxylic acid transport                                    | GO:0006835 | P | 17   | 5.78E-03 | 4.46E-02 |
| 6 | 1896 | F3 vs. L3 | + | Metabolism | Transporters   | endosome                                                       | GO:0005768 | C | 293  | 1.85E-05 | 2.03E-04 |
| 6 | 1897 | F3 vs. L3 | + | Metabolism | Transporters   | export across plasma membrane                                  | GO:0140115 | P | 11   | 1.76E-03 | 1.76E-02 |
| 6 | 1898 | F3 vs. L3 | + | Metabolism | Transporters   | export from cell                                               | GO:0140352 | P | 61   | 1.11E-05 | 2.16E-04 |
| 6 | 1899 | F3 vs. L3 | + | Metabolism | Transporters   | fluid transport                                                | GO:0042044 | P | 22   | 6.06E-03 | 4.60E-02 |
| 6 | 1900 | F3 vs. L3 | + | Metabolism | Transporters   | inorganic anion transmembrane transporter activity             | GO:0015103 | F | 76   | 2.21E-05 | 8.96E-04 |
| 6 | 1901 | F3 vs. L3 | + | Metabolism | Transporters   | inorganic anion transport                                      | GO:0015698 | P | 57   | 1.23E-06 | 3.22E-05 |
| 6 | 1902 | F3 vs. L3 | + | Metabolism | Transporters   | inorganic cation transmembrane transport                       | GO:0098662 | P | 144  | 6.47E-07 | 1.87E-05 |
| 6 | 1903 | F3 vs. L3 | + | Metabolism | Transporters   | inorganic cation transmembrane transporter activity            | GO:0022890 | F | 247  | 2.15E-08 | 2.81E-06 |
| 6 | 1904 | F3 vs. L3 | + | Metabolism | Transporters   | inorganic ion transmembrane transport                          | GO:0098660 | P | 159  | 3.13E-08 | 1.26E-06 |
| 6 | 1905 | F3 vs. L3 | + | Metabolism | Transporters   | inorganic molecular entity transmembrane transporter activity  | GO:0015318 | F | 434  | 3.33E-16 | 1.92E-13 |
| 6 | 1906 | F3 vs. L3 | + | Metabolism | Transporters   | ion transmembrane transport                                    | GO:0034220 | P | 219  | 6.66E-10 | 3.85E-08 |
| 6 | 1907 | F3 vs. L3 | + | Metabolism | Transporters   | ion transmembrane transporter activity                         | GO:0015075 | F | 472  | 1.84E-13 | 4.42E-11 |
|   |      |           |   |            |                | ion transmembrane transporter activity, phosphorylative        |            |   |      |          |          |
| 6 | 1908 | F3 vs. L3 | + | Metabolism | Transporters   | mechanism                                                      | GO:0015662 | F | 34   | 7.56E-06 | 3.95E-04 |
| 6 | 1909 | F3 vs. L3 | + | Metabolism | Transporters   | ion transport                                                  | GO:0006811 | P | 410  | 2.16E-13 | 2.60E-11 |
| 6 | 1910 | F3 vs. L3 | + | Metabolism | Transporters   | locomotion                                                     | GO:0040011 | P | 25   | 1.27E-03 | 1.32E-02 |
| 6 | 1911 | F3 vs. L3 | + | Metabolism | Transporters   | metal ion transmembrane transporter activity                   | GO:0046873 | F | 147  | 6.99E-04 | 1.62E-02 |
| 6 | 1912 | F3 vs. L3 | + | Metabolism | Transporters   | metal ion transport                                            | GO:0030001 | P | 154  | 2.92E-03 | 2.60E-02 |
|   |      |           |   |            |                |                                                                |            |   |      |          |          |
| 6 | 1913 | F3 vs. L3 | + | Metabolism | Transporters   | monovalent inorganic cation transmembrane transporter activity | GO:0015077 | F | 144  | 7.29E-08 | 7.49E-06 |
| 6 | 1914 | F3 vs. L3 | + | Metabolism | Transporters   | monovalent inorganic cation transport                          | GO:0015672 | P | 107  | 1.70E-06 | 4.37E-05 |
| 6 | 1915 | F3 vs. L3 | + | Metabolism | Transporters   | negative regulation of transport                               | GO:0051051 | P | 4    | 3.70E-03 | 3.09E-02 |
| 6 | 1916 | F3 vs. L3 | + | Metabolism | Transporters   | neutral amino acid transmembrane transporter activity          | GO:0015175 | F | 12   | 6.10E-04 | 1.47E-02 |
| 6 | 1917 | F3 vs. L3 | + | Metabolism | Transporters   | neutral amino acid transport                                   | GO:0015804 | P | 7    | 5.10E-03 | 4.02E-02 |
| 6 | 1918 | F3 vs. L3 | + | Metabolism | Transporters   | nitrate transmembrane transporter activity                     | GO:0015112 | F | 16   | 2.11E-04 | 5.88E-03 |
| 6 | 1919 | F3 vs. L3 | + | Metabolism | Transporters   | nitrate transport                                              | GO:0015706 | P | 20   | 1.81E-04 | 2.59E-03 |
| 6 | 1920 | F3 vs. L3 | + | Metabolism | Transporters   | organic acid transmembrane transport                           | GO:1903825 | P | 41   | 3.21E-03 | 2.78E-02 |
| 6 | 1921 | F3 vs. L3 | + | Metabolism | Transporters   | organic acid transmembrane transporter activity                | GO:0005342 | F | 93   | 7.32E-05 | 2.48E-03 |
| 6 | 1922 | F3 vs. L3 | + | Metabolism | Transporters   | organic acid transport                                         | GO:0015849 | P | 79   | 3.53E-03 | 2.98E-02 |

|   |      |           |   |                        |                      |                                                              |            |   |      |          |          |
|---|------|-----------|---|------------------------|----------------------|--------------------------------------------------------------|------------|---|------|----------|----------|
| 6 | 1923 | F3 vs. L3 | + | Metabolism             | Transporters         | organic anion transmembrane transporter activity             | GO:0008514 | F | 149  | 4.32E-04 | 1.11E-02 |
| 6 | 1924 | F3 vs. L3 | + | Metabolism             | Transporters         | organic anion transport                                      | GO:0015711 | P | 109  | 3.37E-04 | 4.34E-03 |
| 6 | 1925 | F3 vs. L3 | + | Metabolism             | Transporters         | organic substance transport                                  | GO:0071702 | P | 635  | 5.93E-03 | 4.53E-02 |
| 6 | 1926 | F3 vs. L3 | + | Metabolism             | Transporters         | plasmodesma                                                  | GO:0009506 | C | 610  | 3.07E-03 | 1.83E-02 |
| 6 | 1927 | F3 vs. L3 | + | Metabolism             | Transporters         | positive chemotaxis                                          | GO:0050918 | P | 23   | 6.43E-04 | 7.51E-03 |
| 6 | 1928 | F3 vs. L3 | + | Metabolism             | Transporters         | primary active transmembrane transporter activity            | GO:0015399 | F | 139  | 9.92E-07 | 6.49E-05 |
| 6 | 1929 | F3 vs. L3 | + | Metabolism             | Transporters         | proton transmembrane transporter activity                    | GO:0015078 | F | 113  | 3.41E-09 | 5.78E-07 |
| 6 | 1930 | F3 vs. L3 | + | Metabolism             | Transporters         | regulation of ion transmembrane transporter activity         | GO:0032412 | P | 7    | 3.58E-03 | 3.01E-02 |
| 6 | 1931 | F3 vs. L3 | + | Metabolism             | Transporters         | regulation of transmembrane transporter activity             | GO:0022898 | P | 7    | 3.58E-03 | 3.02E-02 |
| 6 | 1932 | F3 vs. L3 | + | Metabolism             | Transporters         | regulation of transporter activity                           | GO:0032409 | P | 7    | 3.58E-03 | 3.01E-02 |
| 6 | 1933 | F3 vs. L3 | + | Metabolism             | Transporters         | secondary active transmembrane transporter activity          | GO:0015291 | F | 174  | 6.30E-09 | 9.53E-07 |
| 6 | 1934 | F3 vs. L3 | + | Metabolism             | Transporters         | secretory vesicle                                            | GO:0099503 | C | 114  | 2.12E-05 | 2.27E-04 |
| 6 | 1935 | F3 vs. L3 | + | Metabolism             | Transporters         | sulfate assimilation                                         | GO:0000103 | P | 18   | 2.91E-03 | 2.59E-02 |
| 6 | 1936 | F3 vs. L3 | + | Metabolism             | Transporters         | trans-Golgi network                                          | GO:0005802 | C | 221  | 9.04E-09 | 1.63E-07 |
| 6 | 1937 | F3 vs. L3 | + | Metabolism             | Transporters         | transmembrane transport                                      | GO:0055085 | P | 546  | 1.17E-14 | 1.79E-12 |
| 6 | 1938 | F3 vs. L3 | + | Metabolism             | Transporters         | transmembrane transporter activity                           | GO:0022857 | F | 794  | 0.00E+00 | 0.00E+00 |
| 6 | 1939 | F3 vs. L3 | + | Metabolism             | Transporters         | transport                                                    | GO:0006810 | P | 1380 | 6.36E-11 | 4.52E-09 |
| 6 | 1940 | F3 vs. L3 | + | Metabolism             | Transporters         | transporter activity                                         | GO:0005215 | F | 818  | 0.00E+00 | 0.00E+00 |
| 6 | 1941 | F3 vs. L3 | + | Metabolism             | Transporters         | vesicle                                                      | GO:0031982 | C | 529  | 1.70E-09 | 3.32E-08 |
| 6 | 1942 | F3 vs. L3 | + | Metabolism             | Transporters         | water channel activity                                       | GO:0015250 | F | 22   | 4.92E-04 | 1.24E-02 |
| 6 | 1943 | F3 vs. L3 | + | Metabolism             | Transporters         | water transmembrane transporter activity                     | GO:0005372 | F | 22   | 4.92E-04 | 1.25E-02 |
| 6 | 1944 | F3 vs. L3 | + | Metabolism             | Transporters         | water transport                                              | GO:0006833 | P | 22   | 6.06E-03 | 4.61E-02 |
| 6 | 1945 | F3 vs. L3 | + | Metabolism             | Transporters         | xenobiotic transmembrane transporter activity                | GO:0042910 | F | 45   | 2.32E-04 | 6.35E-03 |
| 6 | 1946 | F3 vs. L3 | + | Regulation             | Protein modification | endoplasmic reticulum                                        | GO:0005783 | C | 668  | 9.02E-03 | 4.65E-02 |
| 6 | 1947 | F3 vs. L3 | + | Regulation             | Protein modification | Golgi apparatus                                              | GO:0005794 | C | 769  | 7.46E-12 | 2.27E-10 |
| 6 | 1948 | F3 vs. L3 | + | Regulation             | Protein modification | modified amino acid binding                                  | GO:0072341 | F | 15   | 9.88E-04 | 2.20E-02 |
| 6 | 1949 | F3 vs. L3 | + | Regulation             | Regulation           | regulation of biological quality                             | GO:0065008 | P | 609  | 2.33E-04 | 3.15E-03 |
| 6 | 1950 | F3 vs. L3 | + | Regulation             | Regulation           | regulation of cell morphogenesis involved in differentiation | GO:0010769 | P | 32   | 7.19E-07 | 2.01E-05 |
| 6 | 1951 | F3 vs. L3 | + | Regulation             | Regulation           | regulation of cellular ketone metabolic process              | GO:0010565 | P | 60   | 4.19E-03 | 3.43E-02 |
| 6 | 1952 | F3 vs. L3 | + | Regulation             | Regulation           | regulation of pollen tube growth                             | GO:0080092 | P | 29   | 9.63E-08 | 3.51E-06 |
| 6 | 1953 | F3 vs. L3 | + | Regulation             | Regulation           | regulation of small molecule metabolic process               | GO:0062012 | P | 76   | 6.43E-04 | 7.53E-03 |
| 6 | 1954 | F3 vs. L3 | + | Regulation             | Regulation           | regulation of unidimensional cell growth                     | GO:0051510 | P | 50   | 4.31E-04 | 5.33E-03 |
| 6 | 1955 | F3 vs. L3 | + | Regulation             | Translation          | poly(U) RNA binding                                          | GO:0008266 | F | 19   | 1.28E-03 | 2.57E-02 |
| 6 | 1956 | F3 vs. L3 | + | Signaling and response | Signaling            | auxin efflux                                                 | GO:0010315 | P | 14   | 9.12E-04 | 9.97E-03 |
| 6 | 1957 | F3 vs. L3 | + | Signaling and response | Signaling            | calcium ion binding                                          | GO:0005509 | F | 158  | 9.44E-09 | 1.36E-06 |
| 6 | 1958 | F3 vs. L3 | + | Signaling and response | Signaling            | cellular response to abiotic stimulus                        | GO:0071214 | P | 121  | 3.21E-03 | 2.78E-02 |
| 6 | 1959 | F3 vs. L3 | + | Signaling and response | Signaling            | cellular response to blue light                              | GO:0071483 | P | 18   | 1.82E-03 | 1.79E-02 |
| 6 | 1960 | F3 vs. L3 | + | Signaling and response | Signaling            | cellular response to chemical stimulus                       | GO:0070887 | P | 659  | 2.18E-03 | 2.06E-02 |
| 6 | 1961 | F3 vs. L3 | + | Signaling and response | Signaling            | cellular response to environmental stimulus                  | GO:0104004 | P | 121  | 3.21E-03 | 2.78E-02 |
| 6 | 1962 | F3 vs. L3 | + | Signaling and response | Signaling            | cellular response to external stimulus                       | GO:0071496 | P | 136  | 1.15E-04 | 1.75E-03 |
| 6 | 1963 | F3 vs. L3 | + | Signaling and response | Signaling            | cellular response to extracellular stimulus                  | GO:0031668 | P | 130  | 1.15E-05 | 2.21E-04 |
| 6 | 1964 | F3 vs. L3 | + | Signaling and response | Signaling            | cellular response to jasmonic acid stimulus                  | GO:0071395 | P | 52   | 1.60E-03 | 1.62E-02 |
| 6 | 1965 | F3 vs. L3 | + | Signaling and response | Signaling            | cellular response to light stimulus                          | GO:0071482 | P | 68   | 2.33E-03 | 2.17E-02 |
| 6 | 1966 | F3 vs. L3 | + | Signaling and response | Signaling            | cellular response to nutrient levels                         | GO:0031669 | P | 103  | 4.23E-04 | 5.25E-03 |
| 6 | 1967 | F3 vs. L3 | + | Signaling and response | Signaling            | cellular response to oxygen levels                           | GO:0071453 | P | 134  | 3.03E-03 | 2.66E-02 |
| 6 | 1968 | F3 vs. L3 | + | Signaling and response | Signaling            | cellular response to oxygen-containing compound              | GO:1901701 | P | 326  | 9.51E-04 | 1.03E-02 |
| 6 | 1969 | F3 vs. L3 | + | Signaling and response | Signaling            | cellular response to salicylic acid stimulus                 | GO:0071446 | P | 36   | 3.92E-04 | 4.90E-03 |
| 6 | 1970 | F3 vs. L3 | + | Signaling and response | Signaling            | cellular response to water stimulus                          | GO:0071462 | P | 27   | 3.05E-03 | 2.68E-02 |
| 6 | 1971 | F3 vs. L3 | + | Signaling and response | Signaling            | cobalt ion binding                                           | GO:0050897 | F | 44   | 2.05E-03 | 3.76E-02 |
| 6 | 1972 | F3 vs. L3 | + | Signaling and response | Signaling            | dephosphorylation                                            | GO:0016311 | P | 133  | 2.41E-03 | 2.24E-02 |
| 6 | 1973 | F3 vs. L3 | + | Signaling and response | Signaling            | disulfide oxidoreductase activity                            | GO:0015036 | F | 53   | 2.77E-04 | 7.32E-03 |
| 6 | 1974 | F3 vs. L3 | + | Signaling and response | Signaling            | jasmonic acid biosynthetic process                           | GO:0009695 | P | 17   | 2.95E-04 | 3.87E-03 |
| 6 | 1975 | F3 vs. L3 | + | Signaling and response | Signaling            | jasmonic acid mediated signaling pathway                     | GO:0009867 | P | 49   | 4.12E-03 | 3.39E-02 |
| 6 | 1976 | F3 vs. L3 | + | Signaling and response | Signaling            | jasmonic acid metabolic process                              | GO:0009694 | P | 34   | 5.63E-03 | 4.37E-02 |
| 6 | 1977 | F3 vs. L3 | + | Signaling and response | Signaling            | multi-organism process                                       | GO:0051704 | P | 298  | 9.13E-06 | 1.85E-04 |
| 6 | 1978 | F3 vs. L3 | + | Signaling and response | Signaling            | phospholipase activity                                       | GO:0004620 | F | 34   | 1.80E-03 | 3.41E-02 |
| 6 | 1979 | F3 vs. L3 | + | Signaling and response | Signaling            | regulation of auxin metabolic process                        | GO:0090354 | P | 14   | 7.15E-04 | 8.13E-03 |
| 6 | 1980 | F3 vs. L3 | + | Signaling and response | Signaling            | regulation of jasmonic acid mediated signaling pathway       | GO:2000022 | P | 27   | 1.99E-04 | 2.81E-03 |
| 6 | 1981 | F3 vs. L3 | + | Signaling and response | Signaling            | regulation of root development                               | GO:2000280 | P | 29   | 1.86E-03 | 1.82E-02 |
| 6 | 1982 | F3 vs. L3 | + | Signaling and response | Signaling            | response to abiotic stimulus                                 | GO:0009628 | P | 1375 | 8.92E-13 | 9.51E-11 |
| 6 | 1983 | F3 vs. L3 | + | Signaling and response | Signaling            | response to acid chemical                                    | GO:0001101 | P | 278  | 6.43E-10 | 3.75E-08 |
| 6 | 1984 | F3 vs. L3 | + | Signaling and response | Signaling            | response to bacterium                                        | GO:0009617 | P | 319  | 2.33E-09 | 1.22E-07 |
| 6 | 1985 | F3 vs. L3 | + | Signaling and response | Signaling            | response to biotic stimulus                                  | GO:0009607 | P | 683  | 1.79E-11 | 1.55E-09 |
| 6 | 1986 | F3 vs. L3 | + | Signaling and response | Signaling            | response to cadmium ion                                      | GO:0046686 | P | 237  | 8.89E-14 | 1.26E-11 |



|   |      |           |   |                        |           |                                              |            |   |      |          |          |
|---|------|-----------|---|------------------------|-----------|----------------------------------------------|------------|---|------|----------|----------|
| 6 | 1987 | F3 vs. L3 | + | Signaling and response | Signaling | response to chemical                         | GO:0042221 | P | 1685 | 0.00E+00 | 0.00E+00 |
| 6 | 1988 | F3 vs. L3 | + | Signaling and response | Signaling | response to chitin                           | GO:0010200 | P | 81   | 5.82E-06 | 1.32E-04 |
| 6 | 1989 | F3 vs. L3 | + | Signaling and response | Signaling | response to endogenous stimulus              | GO:0009719 | P | 802  | 2.66E-07 | 8.66E-06 |
| 6 | 1990 | F3 vs. L3 | + | Signaling and response | Signaling | response to external biotic stimulus         | GO:0043207 | P | 682  | 1.82E-11 | 1.55E-09 |
| 6 | 1991 | F3 vs. L3 | + | Signaling and response | Signaling | response to external stimulus                | GO:0009605 | P | 940  | 3.33E-16 | 8.79E-14 |
| 6 | 1992 | F3 vs. L3 | + | Signaling and response | Signaling | response to extracellular stimulus           | GO:0009991 | P | 165  | 3.28E-06 | 7.87E-05 |
| 6 | 1993 | F3 vs. L3 | + | Signaling and response | Signaling | response to hormone                          | GO:0009725 | P | 785  | 1.63E-07 | 5.65E-06 |
| 6 | 1994 | F3 vs. L3 | + | Signaling and response | Signaling | response to inorganic substance              | GO:0010035 | P | 633  | 0.00E+00 | 0.00E+00 |
| 6 | 1995 | F3 vs. L3 | + | Signaling and response | Signaling | response to jasmonic acid                    | GO:0009753 | P | 123  | 6.34E-11 | 4.57E-09 |
| 6 | 1996 | F3 vs. L3 | + | Signaling and response | Signaling | response to karrikin                         | GO:0080167 | P | 96   | 1.32E-08 | 6.21E-07 |
| 6 | 1997 | F3 vs. L3 | + | Signaling and response | Signaling | response to light intensity                  | GO:0009642 | P | 103  | 4.18E-04 | 5.21E-03 |
| 6 | 1998 | F3 vs. L3 | + | Signaling and response | Signaling | response to light stimulus                   | GO:0009416 | P | 473  | 4.36E-06 | 1.02E-04 |
| 6 | 1999 | F3 vs. L3 | + | Signaling and response | Signaling | response to lipid                            | GO:0033993 | P | 438  | 1.09E-05 | 2.15E-04 |
| 6 | 2000 | F3 vs. L3 | + | Signaling and response | Signaling | response to metal ion                        | GO:0010038 | P | 306  | 3.93E-13 | 4.45E-11 |
| 6 | 2001 | F3 vs. L3 | + | Signaling and response | Signaling | response to nitrate                          | GO:0010167 | P | 18   | 1.62E-03 | 1.64E-02 |
| 6 | 2002 | F3 vs. L3 | + | Signaling and response | Signaling | response to nitrogen compound                | GO:1901698 | P | 184  | 6.11E-04 | 7.22E-03 |
| 6 | 2003 | F3 vs. L3 | + | Signaling and response | Signaling | response to nutrient levels                  | GO:0031667 | P | 137  | 1.15E-04 | 1.76E-03 |
| 6 | 2004 | F3 vs. L3 | + | Signaling and response | Signaling | response to organic substance                | GO:0010033 | P | 1068 | 1.18E-10 | 7.89E-09 |
| 6 | 2005 | F3 vs. L3 | + | Signaling and response | Signaling | response to oxygen levels                    | GO:0070482 | P | 156  | 5.80E-03 | 4.47E-02 |
| 6 | 2006 | F3 vs. L3 | + | Signaling and response | Signaling | response to oxygen-containing compound       | GO:1901700 | P | 990  | 0.00E+00 | 0.00E+00 |
| 6 | 2007 | F3 vs. L3 | + | Signaling and response | Signaling | response to salicylic acid                   | GO:0009751 | P | 91   | 3.30E-06 | 7.89E-05 |
| 6 | 2008 | F3 vs. L3 | + | Signaling and response | Signaling | response to stimulus                         | GO:0050896 | P | 3365 | 1.33E-15 | 2.84E-13 |
| 6 | 2009 | F3 vs. L3 | + | Signaling and response | Signaling | response to temperature stimulus             | GO:0009266 | P | 410  | 4.04E-06 | 9.48E-05 |
| 6 | 2010 | F3 vs. L3 | + | Signaling and response | Signaling | response to UV                               | GO:0009411 | P | 84   | 1.05E-03 | 1.12E-02 |
| 6 | 2011 | F3 vs. L3 | + | Signaling and response | Signaling | response to water                            | GO:0009415 | P | 259  | 1.55E-10 | 1.01E-08 |
| 6 | 2012 | F3 vs. L3 | + | Signaling and response | Signaling | salicylic acid mediated signaling pathway    | GO:0009863 | P | 29   | 5.69E-04 | 6.79E-03 |
| 6 | 2013 | F3 vs. L3 | + | Signaling and response | Signaling | taxis                                        | GO:0042330 | P | 23   | 6.43E-04 | 7.52E-03 |
| 6 | 2014 | F3 vs. L3 | + | Signaling and response | Stress    | aging                                        | GO:0007568 | P | 84   | 8.57E-04 | 9.41E-03 |
| 6 | 2015 | F3 vs. L3 | + | Signaling and response | Stress    | anion homeostasis                            | GO:0055081 | P | 31   | 7.61E-04 | 8.51E-03 |
| 6 | 2016 | F3 vs. L3 | + | Signaling and response | Stress    | antioxidant activity                         | GO:0016209 | F | 82   | 9.66E-07 | 6.46E-05 |
| 6 | 2017 | F3 vs. L3 | + | Signaling and response | Stress    | auxin homeostasis                            | GO:0010252 | P | 26   | 3.18E-03 | 2.77E-02 |
| 6 | 2018 | F3 vs. L3 | + | Signaling and response | Stress    | cation homeostasis                           | GO:0055080 | P | 147  | 4.20E-05 | 7.20E-04 |
| 6 | 2019 | F3 vs. L3 | + | Signaling and response | Stress    | cell redox homeostasis                       | GO:0045454 | P | 54   | 1.07E-03 | 1.14E-02 |
| 6 | 2020 | F3 vs. L3 | + | Signaling and response | Stress    | cellular detoxification                      | GO:1990748 | P | 27   | 2.87E-04 | 3.78E-03 |
| 6 | 2021 | F3 vs. L3 | + | Signaling and response | Stress    | cellular homeostasis                         | GO:0019725 | P | 181  | 3.80E-04 | 4.79E-03 |
| 6 | 2022 | F3 vs. L3 | + | Signaling and response | Stress    | cellular oxidant detoxification              | GO:0098869 | P | 17   | 2.41E-06 | 6.08E-05 |
| 6 | 2023 | F3 vs. L3 | + | Signaling and response | Stress    | cellular response to chemical stress         | GO:0062197 | P | 76   | 4.62E-03 | 3.68E-02 |
| 6 | 2024 | F3 vs. L3 | + | Signaling and response | Stress    | cellular response to decreased oxygen levels | GO:0036294 | P | 133  | 2.87E-03 | 2.56E-02 |
| 6 | 2025 | F3 vs. L3 | + | Signaling and response | Stress    | cellular response to hypoxia                 | GO:0071456 | P | 132  | 4.32E-03 | 3.50E-02 |
| 6 | 2026 | F3 vs. L3 | + | Signaling and response | Stress    | cellular response to oxidative stress        | GO:0034599 | P | 47   | 3.70E-04 | 4.69E-03 |
| 6 | 2027 | F3 vs. L3 | + | Signaling and response | Stress    | cellular response to oxygen radical          | GO:0071450 | P | 8    | 2.13E-03 | 2.02E-02 |
| 6 | 2028 | F3 vs. L3 | + | Signaling and response | Stress    | cellular response to phosphate starvation    | GO:0016036 | P | 50   | 9.57E-04 | 1.03E-02 |
| 6 | 2029 | F3 vs. L3 | + | Signaling and response | Stress    | cellular response to reactive oxygen species | GO:0034614 | P | 23   | 3.70E-03 | 3.10E-02 |
| 6 | 2030 | F3 vs. L3 | + | Signaling and response | Stress    | cellular response to starvation              | GO:0009267 | P | 94   | 8.98E-04 | 9.84E-03 |
| 6 | 2031 | F3 vs. L3 | + | Signaling and response | Stress    | cellular response to superoxide              | GO:0071451 | P | 8    | 2.13E-03 | 2.03E-02 |
| 6 | 2032 | F3 vs. L3 | + | Signaling and response | Stress    | cellular response to toxic substance         | GO:0097237 | P | 28   | 1.03E-04 | 1.61E-03 |
| 6 | 2033 | F3 vs. L3 | + | Signaling and response | Stress    | cellular response to water deprivation       | GO:0042631 | P | 26   | 3.30E-03 | 2.83E-02 |
| 6 | 2034 | F3 vs. L3 | + | Signaling and response | Stress    | chemical homeostasis                         | GO:0048878 | P | 260  | 8.18E-07 | 2.22E-05 |
| 6 | 2035 | F3 vs. L3 | + | Signaling and response | Stress    | defense response                             | GO:0006952 | P | 565  | 7.95E-10 | 4.50E-08 |
| 6 | 2036 | F3 vs. L3 | + | Signaling and response | Stress    | defense response to bacterium                | GO:0042742 | P | 259  | 6.85E-08 | 2.58E-06 |
| 6 | 2037 | F3 vs. L3 | + | Signaling and response | Stress    | defense response to fungus                   | GO:0050832 | P | 149  | 2.66E-03 | 2.41E-02 |
| 6 | 2038 | F3 vs. L3 | + | Signaling and response | Stress    | defense response to insect                   | GO:0002213 | P | 16   | 1.54E-03 | 1.57E-02 |
| 6 | 2039 | F3 vs. L3 | + | Signaling and response | Stress    | defense response to other organism           | GO:0098542 | P | 489  | 5.17E-08 | 2.00E-06 |
| 6 | 2040 | F3 vs. L3 | + | Signaling and response | Stress    | defense response, incompatible interaction   | GO:0009814 | P | 115  | 2.14E-04 | 2.96E-03 |
| 6 | 2041 | F3 vs. L3 | + | Signaling and response | Stress    | detoxification                               | GO:0098754 | P | 60   | 1.48E-08 | 6.66E-07 |
| 6 | 2042 | F3 vs. L3 | + | Signaling and response | Stress    | flavonoid biosynthetic process               | GO:0009813 | P | 33   | 1.65E-05 | 3.10E-04 |
| 6 | 2043 | F3 vs. L3 | + | Signaling and response | Stress    | flavonoid metabolic process                  | GO:0009812 | P | 37   | 4.62E-06 | 1.07E-04 |
| 6 | 2044 | F3 vs. L3 | + | Signaling and response | Stress    | glutathione binding                          | GO:0043295 | F | 11   | 4.76E-05 | 1.75E-03 |
| 6 | 2045 | F3 vs. L3 | + | Signaling and response | Stress    | glutathione metabolic process                | GO:0006749 | P | 27   | 7.97E-05 | 1.28E-03 |
| 6 | 2046 | F3 vs. L3 | + | Signaling and response | Stress    | glutathione transferase activity             | GO:0004364 | F | 31   | 1.14E-04 | 3.42E-03 |
| 6 | 2047 | F3 vs. L3 | + | Signaling and response | Stress    | homeostatic process                          | GO:0042592 | P | 342  | 2.68E-06 | 6.67E-05 |
| 6 | 2048 | F3 vs. L3 | + | Signaling and response | Stress    | hydrogen peroxide catabolic process          | GO:0042744 | P | 17   | 1.30E-04 | 1.96E-03 |
| 6 | 2049 | F3 vs. L3 | + | Signaling and response | Stress    | hydrogen peroxide metabolic process          | GO:0042743 | P | 24   | 1.17E-04 | 1.78E-03 |
| 6 | 2050 | F3 vs. L3 | + | Signaling and response | Stress    | hydrogen peroxide transmembrane transport    | GO:0080170 | P | 5    | 1.87E-03 | 1.83E-02 |

|   |      |           |   |                        |               |                                                                     |            |   |      |          |          |
|---|------|-----------|---|------------------------|---------------|---------------------------------------------------------------------|------------|---|------|----------|----------|
| 6 | 2051 | F3 vs. L3 | + | Signaling and response | Stress        | immune system process                                               | GO:0002376 | P | 214  | 4.44E-03 | 3.55E-02 |
| 6 | 2052 | F3 vs. L3 | + | Signaling and response | Stress        | indole phytoalexin metabolic process                                | GO:0046217 | P | 9    | 1.78E-03 | 1.77E-02 |
| 6 | 2053 | F3 vs. L3 | + | Signaling and response | Stress        | inorganic ion homeostasis                                           | GO:0098771 | P | 157  | 1.65E-05 | 3.10E-04 |
| 6 | 2054 | F3 vs. L3 | + | Signaling and response | Stress        | interspecies interaction between organisms                          | GO:0044419 | P | 696  | 4.87E-11 | 3.60E-09 |
| 6 | 2055 | F3 vs. L3 | + | Signaling and response | Stress        | ion homeostasis                                                     | GO:0050801 | P | 184  | 1.06E-06 | 2.80E-05 |
| 6 | 2056 | F3 vs. L3 | + | Signaling and response | Stress        | monovalent inorganic cation homeostasis                             | GO:0055067 | P | 50   | 2.54E-05 | 4.60E-04 |
| 6 | 2057 | F3 vs. L3 | + | Signaling and response | Stress        | oxidoreductase activity, acting on peroxide as acceptor             | GO:0016684 | F | 64   | 8.48E-05 | 2.77E-03 |
| 6 | 2058 | F3 vs. L3 | + | Signaling and response | Stress        | phytoalexin biosynthetic process                                    | GO:0052315 | P | 9    | 1.78E-03 | 1.78E-02 |
| 6 | 2059 | F3 vs. L3 | + | Signaling and response | Stress        | phytoalexin metabolic process                                       | GO:0052314 | P | 9    | 1.78E-03 | 1.77E-02 |
| 6 | 2060 | F3 vs. L3 | + | Signaling and response | Stress        | reactive nitrogen species metabolic process                         | GO:2001057 | P | 12   | 2.26E-03 | 2.12E-02 |
| 6 | 2061 | F3 vs. L3 | + | Signaling and response | Stress        | reactive oxygen species metabolic process                           | GO:0072593 | P | 49   | 4.43E-07 | 1.35E-05 |
| 6 | 2062 | F3 vs. L3 | + | Signaling and response | Stress        | regulation of pH                                                    | GO:0006885 | P | 35   | 9.07E-05 | 1.43E-03 |
| 6 | 2063 | F3 vs. L3 | + | Signaling and response | Stress        | regulation of stomatal movement                                     | GO:0010119 | P | 68   | 1.83E-03 | 1.80E-02 |
| 6 | 2064 | F3 vs. L3 | + | Signaling and response | Stress        | removal of superoxide radicals                                      | GO:0019430 | P | 8    | 2.13E-03 | 2.02E-02 |
| 6 | 2065 | F3 vs. L3 | + | Signaling and response | Stress        | response to abscisic acid                                           | GO:0009737 | P | 317  | 1.86E-08 | 7.98E-07 |
| 6 | 2066 | F3 vs. L3 | + | Signaling and response | Stress        | response to alcohol                                                 | GO:0097305 | P | 321  | 9.62E-08 | 3.53E-06 |
| 6 | 2067 | F3 vs. L3 | + | Signaling and response | Stress        | response to cold                                                    | GO:0009409 | P | 294  | 3.70E-09 | 1.86E-07 |
| 6 | 2068 | F3 vs. L3 | + | Signaling and response | Stress        | response to decreased oxygen levels                                 | GO:0036293 | P | 155  | 5.55E-03 | 4.31E-02 |
| 6 | 2069 | F3 vs. L3 | + | Signaling and response | Stress        | response to desiccation                                             | GO:0009269 | P | 19   | 1.17E-03 | 1.23E-02 |
| 6 | 2070 | F3 vs. L3 | + | Signaling and response | Stress        | response to fungus                                                  | GO:0009620 | P | 210  | 3.50E-05 | 6.09E-04 |
| 6 | 2071 | F3 vs. L3 | + | Signaling and response | Stress        | response to herbivore                                               | GO:0080027 | P | 8    | 1.22E-03 | 1.27E-02 |
| 6 | 2072 | F3 vs. L3 | + | Signaling and response | Stress        | response to high light intensity                                    | GO:0009644 | P | 48   | 2.41E-04 | 3.24E-03 |
| 6 | 2073 | F3 vs. L3 | + | Signaling and response | Stress        | response to osmotic stress                                          | GO:0006970 | P | 351  | 4.02E-05 | 6.95E-04 |
| 6 | 2074 | F3 vs. L3 | + | Signaling and response | Stress        | response to other organism                                          | GO:0051707 | P | 682  | 1.82E-11 | 1.52E-09 |
| 6 | 2075 | F3 vs. L3 | + | Signaling and response | Stress        | response to oxidative stress                                        | GO:0006979 | P | 294  | 2.58E-09 | 1.32E-07 |
| 6 | 2076 | F3 vs. L3 | + | Signaling and response | Stress        | response to oxygen radical                                          | GO:0000305 | P | 9    | 2.44E-03 | 2.26E-02 |
| 6 | 2077 | F3 vs. L3 | + | Signaling and response | Stress        | response to ozone                                                   | GO:0010193 | P | 24   | 2.32E-04 | 3.16E-03 |
| 6 | 2078 | F3 vs. L3 | + | Signaling and response | Stress        | response to radiation                                               | GO:0009314 | P | 486  | 4.66E-05 | 7.85E-04 |
| 6 | 2079 | F3 vs. L3 | + | Signaling and response | Stress        | response to reactive oxygen species                                 | GO:0000302 | P | 105  | 2.13E-04 | 2.96E-03 |
| 6 | 2080 | F3 vs. L3 | + | Signaling and response | Stress        | response to salt stress                                             | GO:0009651 | P | 294  | 2.09E-04 | 2.91E-03 |
| 6 | 2081 | F3 vs. L3 | + | Signaling and response | Stress        | response to starvation                                              | GO:0042594 | P | 117  | 2.90E-04 | 3.80E-03 |
| 6 | 2082 | F3 vs. L3 | + | Signaling and response | Stress        | response to stress                                                  | GO:0006950 | P | 1928 | 4.30E-12 | 4.11E-10 |
| 6 | 2083 | F3 vs. L3 | + | Signaling and response | Stress        | response to superoxide                                              | GO:0000303 | P | 9    | 2.44E-03 | 2.25E-02 |
| 6 | 2084 | F3 vs. L3 | + | Signaling and response | Stress        | response to toxic substance                                         | GO:0009636 | P | 73   | 1.86E-09 | 9.92E-08 |
| 6 | 2085 | F3 vs. L3 | + | Signaling and response | Stress        | response to UV-B                                                    | GO:0010224 | P | 51   | 5.40E-04 | 6.48E-03 |
| 6 | 2086 | F3 vs. L3 | + | Signaling and response | Stress        | response to water deprivation                                       | GO:0009414 | P | 253  | 2.25E-10 | 1.42E-08 |
| 6 | 2087 | F3 vs. L3 | + | Signaling and response | Stress        | response to wounding                                                | GO:0009611 | P | 158  | 0.00E+00 | 0.00E+00 |
| 6 | 2088 | F3 vs. L3 | + | Signaling and response | Stress        | superoxide metabolic process                                        | GO:0006801 | P | 8    | 2.13E-03 | 2.03E-02 |
| 6 | 2089 | F3 vs. L3 | + | Signaling and response | Stress        | toxin biosynthetic process                                          | GO:0009403 | P | 9    | 1.78E-03 | 1.78E-02 |
| 6 | 2090 | F3 vs. L3 | + | Signaling and response | Stress        | toxin catabolic process                                             | GO:0009407 | P | 25   | 3.24E-04 | 4.21E-03 |
| 6 | 2091 | F3 vs. L3 | + | Signaling and response | Stress        | toxin metabolic process                                             | GO:0009404 | P | 34   | 2.76E-06 | 6.83E-05 |
| 6 | 2092 | F3 vs. L3 | - | Development            | Cell division | anaphase-promoting complex                                          | GO:0005680 | C | 14   | 5.52E-03 | 3.07E-02 |
| 6 | 2093 | F3 vs. L3 | - | Development            | Cell division | anaphase-promoting complex-dependent catabolic process              | GO:0031145 | P | 11   | 5.39E-03 | 4.20E-02 |
| 6 | 2094 | F3 vs. L3 | - | Development            | Cell division | Cajal body                                                          | GO:0015030 | C | 13   | 1.60E-03 | 1.02E-02 |
| 6 | 2095 | F3 vs. L3 | - | Development            | Cell division | cell cycle                                                          | GO:0007049 | P | 294  | 6.77E-15 | 1.10E-12 |
| 6 | 2096 | F3 vs. L3 | - | Development            | Cell division | cell cycle checkpoint                                               | GO:0000075 | P | 26   | 5.59E-06 | 1.28E-04 |
| 6 | 2097 | F3 vs. L3 | - | Development            | Cell division | cell cycle phase transition                                         | GO:0044770 | P | 31   | 1.18E-06 | 3.11E-05 |
| 6 | 2098 | F3 vs. L3 | - | Development            | Cell division | cell cycle process                                                  | GO:0022402 | P | 270  | 1.22E-15 | 2.71E-13 |
| 6 | 2099 | F3 vs. L3 | - | Development            | Cell division | chromatin assembly                                                  | GO:0031497 | P | 53   | 1.87E-05 | 3.48E-04 |
| 6 | 2100 | F3 vs. L3 | - | Development            | Cell division | chromosome                                                          | GO:0005694 | C | 293  | 1.06E-10 | 2.94E-09 |
| 6 | 2101 | F3 vs. L3 | - | Development            | Cell division | chromosome organization involved in meiotic cell cycle              | GO:0070192 | P | 30   | 2.65E-03 | 2.41E-02 |
| 6 | 2102 | F3 vs. L3 | - | Development            | Cell division | chromosome segregation                                              | GO:0007059 | P | 63   | 5.02E-05 | 8.40E-04 |
| 6 | 2103 | F3 vs. L3 | - | Development            | Cell division | chromosome, centromeric region                                      | GO:0000775 | C | 28   | 4.12E-05 | 3.97E-04 |
| 6 | 2104 | F3 vs. L3 | - | Development            | Cell division | condensed chromosome                                                | GO:0000793 | C | 41   | 1.65E-03 | 1.04E-02 |
| 6 | 2105 | F3 vs. L3 | - | Development            | Cell division | condensed nuclear chromosome, centromeric region                    | GO:0000780 | C | 10   | 7.64E-03 | 4.08E-02 |
| 6 | 2106 | F3 vs. L3 | - | Development            | Cell division | cyclin-dependent protein kinase holoenzyme complex                  | GO:0000307 | C | 37   | 1.35E-04 | 1.23E-03 |
| 6 | 2107 | F3 vs. L3 | - | Development            | Cell division | cyclin-dependent protein serine/threonine kinase regulator activity | GO:0016538 | F | 32   | 1.12E-05 | 5.28E-04 |
| 6 | 2108 | F3 vs. L3 | - | Development            | Cell division | cytokinesis by cell plate formation                                 | GO:0000911 | P | 51   | 6.76E-07 | 1.91E-05 |
| 6 | 2109 | F3 vs. L3 | - | Development            | Cell division | DNA biosynthetic process                                            | GO:0071897 | P | 18   | 4.20E-05 | 7.19E-04 |
| 6 | 2110 | F3 vs. L3 | - | Development            | Cell division | DNA damage checkpoint                                               | GO:0000077 | P | 8    | 5.86E-04 | 6.96E-03 |
| 6 | 2111 | F3 vs. L3 | - | Development            | Cell division | DNA integrity checkpoint                                            | GO:0031570 | P | 15   | 6.92E-05 | 1.11E-03 |
| 6 | 2112 | F3 vs. L3 | - | Development            | Cell division | DNA packaging                                                       | GO:0006323 | P | 63   | 5.09E-04 | 6.18E-03 |
| 6 | 2113 | F3 vs. L3 | - | Development            | Cell division | DNA polymerase complex                                              | GO:0042575 | C | 13   | 3.57E-03 | 2.05E-02 |



|   |      |           |   |             |               |                                                            |            |   |      |          |          |
|---|------|-----------|---|-------------|---------------|------------------------------------------------------------|------------|---|------|----------|----------|
| 6 | 2114 | F3 vs. L3 | - | Development | Cell division | DNA recombination                                          | GO:0006310 | P | 85   | 2.33E-07 | 7.66E-06 |
| 6 | 2115 | F3 vs. L3 | - | Development | Cell division | DNA repair                                                 | GO:0006281 | P | 189  | 7.06E-14 | 1.03E-11 |
| 6 | 2116 | F3 vs. L3 | - | Development | Cell division | DNA replication                                            | GO:0006260 | P | 78   | 7.34E-11 | 5.02E-09 |
| 6 | 2117 | F3 vs. L3 | - | Development | Cell division | DNA replication factor A complex                           | GO:0005662 | C | 8    | 6.33E-03 | 3.46E-02 |
| 6 | 2118 | F3 vs. L3 | - | Development | Cell division | DNA replication factor C complex                           | GO:0005663 | C | 5    | 9.64E-03 | 4.89E-02 |
| 6 | 2119 | F3 vs. L3 | - | Development | Cell division | DNA replication initiation                                 | GO:0006270 | P | 16   | 9.53E-05 | 1.50E-03 |
| 6 | 2120 | F3 vs. L3 | - | Development | Cell division | DNA replication origin binding                             | GO:0003688 | F | 13   | 2.67E-04 | 7.11E-03 |
| 6 | 2121 | F3 vs. L3 | - | Development | Cell division | DNA strand elongation                                      | GO:0022616 | P | 13   | 5.46E-05 | 9.06E-04 |
| 6 | 2122 | F3 vs. L3 | - | Development | Cell division | DNA strand elongation involved in DNA replication          | GO:0006271 | P | 13   | 5.46E-05 | 9.09E-04 |
| 6 | 2123 | F3 vs. L3 | - | Development | Cell division | DNA unwinding involved in DNA replication                  | GO:0006268 | P | 12   | 1.36E-03 | 1.40E-02 |
| 6 | 2124 | F3 vs. L3 | - | Development | Cell division | DNA-dependent DNA replication                              | GO:0006261 | P | 68   | 1.69E-10 | 1.09E-08 |
| 6 | 2125 | F3 vs. L3 | - | Development | Cell division | double-strand break repair                                 | GO:0006302 | P | 76   | 1.27E-07 | 4.53E-06 |
| 6 | 2126 | F3 vs. L3 | - | Development | Cell division | double-strand break repair via homologous recombination    | GO:0000724 | P | 53   | 7.01E-06 | 1.54E-04 |
| 6 | 2127 | F3 vs. L3 | - | Development | Cell division | homologous chromosome pairing at meiosis                   | GO:0007129 | P | 20   | 2.71E-03 | 2.44E-02 |
| 6 | 2128 | F3 vs. L3 | - | Development | Cell division | homologous chromosome segregation                          | GO:0045143 | P | 21   | 2.81E-03 | 2.52E-02 |
| 6 | 2129 | F3 vs. L3 | - | Development | Cell division | homologous recombination                                   | GO:0035825 | P | 25   | 7.61E-04 | 8.52E-03 |
| 6 | 2130 | F3 vs. L3 | - | Development | Cell division | kinetochore                                                | GO:0000776 | C | 13   | 3.42E-04 | 2.89E-03 |
| 6 | 2131 | F3 vs. L3 | - | Development | Cell division | meiosis I                                                  | GO:0007127 | P | 33   | 1.04E-04 | 1.61E-03 |
| 6 | 2132 | F3 vs. L3 | - | Development | Cell division | meiosis I cell cycle process                               | GO:0061982 | P | 36   | 1.09E-05 | 2.14E-04 |
| 6 | 2133 | F3 vs. L3 | - | Development | Cell division | meiotic cell cycle                                         | GO:0051321 | P | 92   | 6.43E-06 | 1.43E-04 |
| 6 | 2134 | F3 vs. L3 | - | Development | Cell division | meiotic cell cycle process                                 | GO:1903046 | P | 83   | 4.15E-05 | 7.14E-04 |
| 6 | 2135 | F3 vs. L3 | - | Development | Cell division | meiotic chromosome segregation                             | GO:0045132 | P | 31   | 1.40E-04 | 2.06E-03 |
| 6 | 2136 | F3 vs. L3 | - | Development | Cell division | meiotic nuclear division                                   | GO:0140013 | P | 53   | 1.54E-05 | 2.92E-04 |
| 6 | 2137 | F3 vs. L3 | - | Development | Cell division | microtubule cytoskeleton organization involved in mitosis  | GO:1902850 | P | 22   | 1.39E-04 | 2.07E-03 |
| 6 | 2138 | F3 vs. L3 | - | Development | Cell division | mismatch repair                                            | GO:0006298 | P | 13   | 7.02E-04 | 8.03E-03 |
| 6 | 2139 | F3 vs. L3 | - | Development | Cell division | mitotic cell cycle                                         | GO:0000278 | P | 163  | 3.38E-07 | 1.07E-05 |
| 6 | 2140 | F3 vs. L3 | - | Development | Cell division | mitotic cell cycle checkpoint                              | GO:0007093 | P | 19   | 1.75E-04 | 2.52E-03 |
| 6 | 2141 | F3 vs. L3 | - | Development | Cell division | mitotic cell cycle phase transition                        | GO:0044772 | P | 30   | 5.89E-07 | 1.73E-05 |
| 6 | 2142 | F3 vs. L3 | - | Development | Cell division | mitotic cell cycle process                                 | GO:1903047 | P | 139  | 2.60E-08 | 1.09E-06 |
| 6 | 2143 | F3 vs. L3 | - | Development | Cell division | mitotic DNA integrity checkpoint                           | GO:0044774 | P | 8    | 1.78E-03 | 1.78E-02 |
| 6 | 2144 | F3 vs. L3 | - | Development | Cell division | mitotic nuclear division                                   | GO:0140014 | P | 40   | 7.09E-04 | 8.10E-03 |
| 6 | 2145 | F3 vs. L3 | - | Development | Cell division | mitotic spindle                                            | GO:0072686 | C | 14   | 4.03E-04 | 3.30E-03 |
| 6 | 2146 | F3 vs. L3 | - | Development | Cell division | mitotic spindle assembly                                   | GO:0090307 | P | 7    | 7.73E-04 | 8.62E-03 |
| 6 | 2147 | F3 vs. L3 | - | Development | Cell division | mitotic spindle organization                               | GO:0007052 | P | 19   | 1.81E-03 | 1.78E-02 |
| 6 | 2148 | F3 vs. L3 | - | Development | Cell division | negative regulation of cell cycle                          | GO:0045786 | P | 45   | 1.59E-05 | 3.01E-04 |
| 6 | 2149 | F3 vs. L3 | - | Development | Cell division | negative regulation of cell cycle phase transition         | GO:1901988 | P | 13   | 3.55E-04 | 4.52E-03 |
| 6 | 2150 | F3 vs. L3 | - | Development | Cell division | negative regulation of cell cycle process                  | GO:0010948 | P | 25   | 1.39E-03 | 1.42E-02 |
| 6 | 2151 | F3 vs. L3 | - | Development | Cell division | negative regulation of chromosome organization             | GO:2001251 | P | 9    | 1.87E-03 | 1.82E-02 |
| 6 | 2152 | F3 vs. L3 | - | Development | Cell division | negative regulation of mitotic cell cycle                  | GO:0045930 | P | 25   | 1.62E-04 | 2.35E-03 |
| 6 | 2153 | F3 vs. L3 | - | Development | Cell division | negative regulation of mitotic cell cycle phase transition | GO:1901991 | P | 13   | 3.55E-04 | 4.53E-03 |
| 6 | 2154 | F3 vs. L3 | - | Development | Cell division | nuclear chromosome segregation                             | GO:0098813 | P | 56   | 1.57E-04 | 2.30E-03 |
| 6 | 2155 | F3 vs. L3 | - | Development | Cell division | nuclear division                                           | GO:0000280 | P | 90   | 1.45E-08 | 6.61E-07 |
| 6 | 2156 | F3 vs. L3 | - | Development | Cell division | nuclear DNA replication                                    | GO:0033260 | P | 10   | 8.04E-04 | 8.95E-03 |
| 6 | 2157 | F3 vs. L3 | - | Development | Cell division | nuclear origin of replication recognition complex          | GO:0005664 | C | 4    | 4.82E-03 | 2.73E-02 |
| 6 | 2158 | F3 vs. L3 | - | Development | Cell division | nuclear replication fork                                   | GO:0043596 | C | 20   | 6.50E-05 | 5.96E-04 |
| 6 | 2159 | F3 vs. L3 | - | Development | Cell division | nuclease activity                                          | GO:0004518 | F | 122  | 1.76E-03 | 3.38E-02 |
| 6 | 2160 | F3 vs. L3 | - | Development | Cell division | nucleic acid metabolic process                             | GO:0090304 | P | 1012 | 0.00E+00 | 0.00E+00 |
| 6 | 2161 | F3 vs. L3 | - | Development | Cell division | nucleobase-containing compound metabolic process           | GO:0006139 | P | 1273 | 0.00E+00 | 0.00E+00 |
| 6 | 2162 | F3 vs. L3 | - | Development | Cell division | nucleosome assembly                                        | GO:0006334 | P | 33   | 9.54E-04 | 1.03E-02 |
| 6 | 2163 | F3 vs. L3 | - | Development | Cell division | origin recognition complex                                 | GO:0000808 | C | 4    | 4.82E-03 | 2.71E-02 |
| 6 | 2164 | F3 vs. L3 | - | Development | Cell division | positive regulation of cell cycle                          | GO:0045787 | P | 29   | 4.73E-03 | 3.76E-02 |
| 6 | 2165 | F3 vs. L3 | - | Development | Cell division | preprophase band                                           | GO:0009574 | C | 14   | 1.19E-03 | 7.74E-03 |
| 6 | 2166 | F3 vs. L3 | - | Development | Cell division | preprophase band assembly                                  | GO:0000913 | P | 6    | 4.08E-03 | 3.36E-02 |
| 6 | 2167 | F3 vs. L3 | - | Development | Cell division | reciprocal homologous recombination                        | GO:0140527 | P | 25   | 7.61E-04 | 8.55E-03 |
| 6 | 2168 | F3 vs. L3 | - | Development | Cell division | reciprocal meiotic recombination                           | GO:0007131 | P | 25   | 7.61E-04 | 8.54E-03 |
| 6 | 2169 | F3 vs. L3 | - | Development | Cell division | recombinational repair                                     | GO:0000725 | P | 56   | 1.02E-05 | 2.03E-04 |
| 6 | 2170 | F3 vs. L3 | - | Development | Cell division | regulation of cell cycle                                   | GO:0051726 | P | 146  | 9.48E-14 | 1.31E-11 |
| 6 | 2171 | F3 vs. L3 | - | Development | Cell division | regulation of cell cycle G2/M phase transition             | GO:1902749 | P | 16   | 1.11E-03 | 1.18E-02 |
| 6 | 2172 | F3 vs. L3 | - | Development | Cell division | regulation of cell cycle phase transition                  | GO:1901987 | P | 33   | 6.52E-07 | 1.85E-05 |
| 6 | 2173 | F3 vs. L3 | - | Development | Cell division | regulation of cell cycle process                           | GO:0010564 | P | 73   | 1.41E-09 | 7.68E-08 |
| 6 | 2174 | F3 vs. L3 | - | Development | Cell division | regulation of cell division                                | GO:0051302 | P | 42   | 1.46E-04 | 2.15E-03 |
| 6 | 2175 | F3 vs. L3 | - | Development | Cell division | regulation of chromatin organization                       | GO:1902275 | P | 43   | 4.32E-03 | 3.51E-02 |
| 6 | 2176 | F3 vs. L3 | - | Development | Cell division | regulation of chromosome organization                      | GO:0033044 | P | 40   | 6.83E-06 | 1.51E-04 |
| 6 | 2177 | F3 vs. L3 | - | Development | Cell division | regulation of chromosome segregation                       | GO:0051983 | P | 16   | 2.15E-04 | 2.96E-03 |

|   |      |           |   |             |               |                                                           |            |   |      |          |          |
|---|------|-----------|---|-------------|---------------|-----------------------------------------------------------|------------|---|------|----------|----------|
| 6 | 2178 | F3 vs. L3 | - | Development | Cell division | regulation of chromosome separation                       | GO:1905818 | P | 15   | 5.08E-04 | 6.18E-03 |
| 6 | 2179 | F3 vs. L3 | - | Development | Cell division | regulation of cyclin-dependent protein kinase activity    | GO:1904029 | P | 32   | 4.07E-03 | 3.36E-02 |
| 6 | 2180 | F3 vs. L3 | - | Development | Cell division | regulation of DNA metabolic process                       | GO:0051052 | P | 53   | 3.02E-06 | 7.42E-05 |
| 6 | 2181 | F3 vs. L3 | - | Development | Cell division | regulation of DNA replication                             | GO:0006275 | P | 34   | 5.30E-04 | 6.39E-03 |
| 6 | 2182 | F3 vs. L3 | - | Development | Cell division | regulation of DNA-dependent DNA replication               | GO:0090329 | P | 28   | 3.84E-03 | 3.19E-02 |
| 6 | 2183 | F3 vs. L3 | - | Development | Cell division | regulation of G2/M transition of mitotic cell cycle       | GO:0010389 | P | 15   | 1.26E-03 | 1.31E-02 |
| 6 | 2184 | F3 vs. L3 | - | Development | Cell division | regulation of helicase activity                           | GO:0051095 | P | 6    | 3.00E-03 | 2.65E-02 |
| 6 | 2185 | F3 vs. L3 | - | Development | Cell division | regulation of metaphase/anaphase transition of cell cycle | GO:1902099 | P | 15   | 5.08E-04 | 6.19E-03 |
| 6 | 2186 | F3 vs. L3 | - | Development | Cell division | regulation of mitotic cell cycle                          | GO:0007346 | P | 52   | 6.19E-07 | 1.81E-05 |
| 6 | 2187 | F3 vs. L3 | - | Development | Cell division | regulation of mitotic cell cycle phase transition         | GO:1901990 | P | 31   | 1.50E-06 | 3.87E-05 |
| 6 | 2188 | F3 vs. L3 | - | Development | Cell division | regulation of mitotic metaphase/anaphase transition       | GO:0030071 | P | 15   | 5.08E-04 | 6.21E-03 |
| 6 | 2189 | F3 vs. L3 | - | Development | Cell division | regulation of mitotic nuclear division                    | GO:0007088 | P | 18   | 3.24E-03 | 2.80E-02 |
| 6 | 2190 | F3 vs. L3 | - | Development | Cell division | regulation of mitotic sister chromatid separation         | GO:0010965 | P | 15   | 5.08E-04 | 6.22E-03 |
| 6 | 2191 | F3 vs. L3 | - | Development | Cell division | regulation of mitotic spindle organization                | GO:0060236 | P | 5    | 4.36E-03 | 3.52E-02 |
| 6 | 2192 | F3 vs. L3 | - | Development | Cell division | regulation of nuclear division                            | GO:0051783 | P | 28   | 5.95E-04 | 7.05E-03 |
| 6 | 2193 | F3 vs. L3 | - | Development | Cell division | regulation of sister chromatid segregation                | GO:0033045 | P | 16   | 2.15E-04 | 2.95E-03 |
| 6 | 2194 | F3 vs. L3 | - | Development | Cell division | regulation of spindle organization                        | GO:0090224 | P | 5    | 4.36E-03 | 3.52E-02 |
| 6 | 2195 | F3 vs. L3 | - | Development | Cell division | replication fork                                          | GO:0005657 | C | 32   | 4.67E-08 | 7.58E-07 |
| 6 | 2196 | F3 vs. L3 | - | Development | Cell division | replisome                                                 | GO:0030894 | C | 17   | 5.33E-05 | 4.94E-04 |
| 6 | 2197 | F3 vs. L3 | - | Development | Cell division | RNA metabolic process                                     | GO:0016070 | P | 774  | 0.00E+00 | 0.00E+00 |
| 6 | 2198 | F3 vs. L3 | - | Development | Cell division | single-stranded DNA binding                               | GO:0003697 | F | 52   | 1.12E-06 | 7.00E-05 |
| 6 | 2199 | F3 vs. L3 | - | Development | Cell division | site of double-strand break                               | GO:0035861 | C | 6    | 6.66E-03 | 3.60E-02 |
| 6 | 2200 | F3 vs. L3 | - | Development | Cell division | spindle                                                   | GO:0005819 | C | 51   | 5.14E-10 | 1.09E-08 |
| 6 | 2201 | F3 vs. L3 | - | Development | Cell division | spindle assembly                                          | GO:0051225 | P | 24   | 8.63E-06 | 1.79E-04 |
| 6 | 2202 | F3 vs. L3 | - | Development | Cell division | spindle microtubule                                       | GO:0005876 | C | 13   | 5.57E-04 | 4.17E-03 |
| 6 | 2203 | F3 vs. L3 | - | Development | Cell division | spindle organization                                      | GO:0007051 | P | 37   | 6.84E-06 | 1.51E-04 |
| 6 | 2204 | F3 vs. L3 | - | Development | Cell division | telomere maintenance                                      | GO:0000723 | P | 20   | 2.49E-03 | 2.28E-02 |
| 6 | 2205 | F3 vs. L3 | - | Development | Cell division | telomere organization                                     | GO:0032200 | P | 20   | 2.49E-03 | 2.28E-02 |
| 6 | 2206 | F3 vs. L3 | - | Development | Development   | anatomical structure homeostasis                          | GO:0060249 | P | 23   | 1.36E-03 | 1.40E-02 |
| 6 | 2207 | F3 vs. L3 | - | Development | Development   | cellular component assembly                               | GO:0022607 | P | 536  | 2.25E-08 | 9.52E-07 |
| 6 | 2208 | F3 vs. L3 | - | Development | Development   | cellular component biogenesis                             | GO:0044085 | P | 840  | 9.43E-07 | 2.53E-05 |
| 6 | 2209 | F3 vs. L3 | - | Development | Development   | cellular component organization                           | GO:0016043 | P | 1497 | 1.67E-03 | 1.68E-02 |
| 6 | 2210 | F3 vs. L3 | - | Development | Development   | cellular component organization or biogenesis             | GO:0071840 | P | 1752 | 3.21E-04 | 4.17E-03 |
| 6 | 2211 | F3 vs. L3 | - | Development | Development   | chromatin                                                 | GO:0000785 | C | 182  | 6.16E-03 | 3.41E-02 |
| 6 | 2212 | F3 vs. L3 | - | Development | Development   | chromatin assembly or disassembly                         | GO:0006333 | P | 61   | 1.08E-05 | 2.14E-04 |
| 6 | 2213 | F3 vs. L3 | - | Development | Development   | chromatin organization                                    | GO:0006325 | P | 210  | 3.29E-12 | 3.20E-10 |
| 6 | 2214 | F3 vs. L3 | - | Development | Development   | chromosomal region                                        | GO:0098687 | C | 37   | 1.72E-07 | 2.58E-06 |
| 6 | 2215 | F3 vs. L3 | - | Development | Development   | chromosome organization                                   | GO:0051276 | P | 307  | 0.00E+00 | 0.00E+00 |
| 6 | 2216 | F3 vs. L3 | - | Development | Development   | chromosome, telomeric region                              | GO:0000781 | C | 8    | 3.02E-03 | 1.81E-02 |
| 6 | 2217 | F3 vs. L3 | - | Development | Development   | cortical cytoskeleton organization                        | GO:0030865 | P | 43   | 5.25E-04 | 6.36E-03 |
| 6 | 2218 | F3 vs. L3 | - | Development | Development   | cytoplasmic microtubule                                   | GO:0005881 | C | 30   | 9.45E-03 | 4.81E-02 |
| 6 | 2219 | F3 vs. L3 | - | Development | Development   | cytoskeleton                                              | GO:0005856 | C | 195  | 2.18E-03 | 1.33E-02 |
| 6 | 2220 | F3 vs. L3 | - | Development | Development   | embryo development                                        | GO:0009790 | P | 348  | 4.51E-04 | 5.55E-03 |
| 6 | 2221 | F3 vs. L3 | - | Development | Development   | embryo development ending in seed dormancy                | GO:0009793 | P | 332  | 3.50E-04 | 4.48E-03 |
| 6 | 2222 | F3 vs. L3 | - | Development | Development   | heterochromatin                                           | GO:0000792 | C | 9    | 7.71E-03 | 4.10E-02 |
| 6 | 2223 | F3 vs. L3 | - | Development | Development   | heterochromatin assembly                                  | GO:0031507 | P | 19   | 1.02E-03 | 1.10E-02 |
| 6 | 2224 | F3 vs. L3 | - | Development | Development   | heterochromatin organization                              | GO:0070828 | P | 23   | 2.41E-04 | 3.25E-03 |
| 6 | 2225 | F3 vs. L3 | - | Development | Development   | intracellular non-membrane-bounded organelle              | GO:0043232 | C | 1100 | 0.00E+00 | 0.00E+00 |
| 6 | 2226 | F3 vs. L3 | - | Development | Development   | intracellular organelle lumen                             | GO:0070013 | C | 849  | 0.00E+00 | 0.00E+00 |
| 6 | 2227 | F3 vs. L3 | - | Development | Development   | kinetochore microtubule                                   | GO:0005828 | C | 4    | 3.30E-03 | 1.91E-02 |
| 6 | 2228 | F3 vs. L3 | - | Development | Development   | maintenance of floral organ identity                      | GO:0048497 | P | 8    | 2.93E-03 | 2.59E-02 |
| 6 | 2229 | F3 vs. L3 | - | Development | Development   | maintenance of plant organ identity                       | GO:0090700 | P | 8    | 2.93E-03 | 2.60E-02 |
| 6 | 2230 | F3 vs. L3 | - | Development | Development   | membrane-enclosed lumen                                   | GO:0031974 | C | 849  | 0.00E+00 | 0.00E+00 |
| 6 | 2231 | F3 vs. L3 | - | Development | Development   | meristem development                                      | GO:0048507 | P | 132  | 2.16E-03 | 2.04E-02 |
| 6 | 2232 | F3 vs. L3 | - | Development | Development   | microtubule                                               | GO:0005874 | C | 96   | 5.02E-06 | 6.03E-05 |
| 6 | 2233 | F3 vs. L3 | - | Development | Development   | microtubule associated complex                            | GO:0005875 | C | 47   | 1.89E-05 | 2.04E-04 |
| 6 | 2234 | F3 vs. L3 | - | Development | Development   | microtubule cytoskeleton                                  | GO:0015630 | C | 143  | 1.78E-08 | 2.99E-07 |
| 6 | 2235 | F3 vs. L3 | - | Development | Development   | microtubule cytoskeleton organization                     | GO:0000226 | P | 110  | 8.52E-06 | 1.78E-04 |
| 6 | 2236 | F3 vs. L3 | - | Development | Development   | microtubule-based process                                 | GO:0007017 | P | 148  | 1.98E-07 | 6.64E-06 |
| 6 | 2237 | F3 vs. L3 | - | Development | Development   | non-membrane-bounded organelle                            | GO:0043228 | C | 1100 | 0.00E+00 | 0.00E+00 |
| 6 | 2238 | F3 vs. L3 | - | Development | Development   | nuclear body                                              | GO:0016604 | C | 71   | 2.83E-05 | 2.90E-04 |
| 6 | 2239 | F3 vs. L3 | - | Development | Development   | nuclear chromosome                                        | GO:0000228 | C | 192  | 2.43E-06 | 3.07E-05 |
| 6 | 2240 | F3 vs. L3 | - | Development | Development   | nuclear envelope                                          | GO:0005635 | C | 64   | 2.02E-03 | 1.25E-02 |
| 6 | 2241 | F3 vs. L3 | - | Development | Development   | nuclear lumen                                             | GO:0031981 | C | 741  | 0.00E+00 | 0.00E+00 |



|   |      |           |   |             |               |                                                                   |            |   |      |          |          |
|---|------|-----------|---|-------------|---------------|-------------------------------------------------------------------|------------|---|------|----------|----------|
| 6 | 2242 | F3 vs. L3 | - | Development | Development   | nuclear pore                                                      | GO:0005643 | C | 28   | 1.60E-03 | 1.02E-02 |
| 6 | 2243 | F3 vs. L3 | - | Development | Development   | nuclear pore outer ring                                           | GO:0031080 | C | 5    | 8.88E-03 | 4.60E-02 |
| 6 | 2244 | F3 vs. L3 | - | Development | Development   | nuclear replisome                                                 | GO:0043601 | C | 17   | 5.33E-05 | 4.99E-04 |
| 6 | 2245 | F3 vs. L3 | - | Development | Development   | nucleoplasm                                                       | GO:0005654 | C | 277  | 1.79E-14 | 6.96E-13 |
| 6 | 2246 | F3 vs. L3 | - | Development | Development   | nucleus                                                           | GO:0005634 | C | 5394 | 0.00E+00 | 0.00E+00 |
| 6 | 2247 | F3 vs. L3 | - | Development | Development   | organelle assembly                                                | GO:0070925 | P | 119  | 3.13E-08 | 1.26E-06 |
| 6 | 2248 | F3 vs. L3 | - | Development | Development   | organelle fission                                                 | GO:0048285 | P | 118  | 3.19E-07 | 1.02E-05 |
| 6 | 2249 | F3 vs. L3 | - | Development | Development   | organelle lumen                                                   | GO:0043233 | C | 849  | 0.00E+00 | 0.00E+00 |
| 6 | 2250 | F3 vs. L3 | - | Development | Development   | organelle organization                                            | GO:0006996 | P | 1028 | 1.33E-08 | 6.18E-07 |
| 6 | 2251 | F3 vs. L3 | - | Development | Development   | phragmoplast                                                      | GO:0009524 | C | 45   | 2.17E-05 | 2.27E-04 |
| 6 | 2252 | F3 vs. L3 | - | Development | Development   | phyllotactic patterning                                           | GO:0060771 | P | 4    | 5.07E-03 | 4.00E-02 |
| 6 | 2253 | F3 vs. L3 | - | Development | Development   | polymeric cytoskeletal fiber                                      | GO:0099513 | C | 104  | 1.93E-04 | 1.67E-03 |
| 6 | 2254 | F3 vs. L3 | - | Development | Development   | radial pattern formation                                          | GO:0009956 | P | 16   | 2.68E-03 | 2.43E-02 |
| 6 | 2255 | F3 vs. L3 | - | Development | Development   | structural constituent of nuclear pore                            | GO:0017056 | F | 14   | 8.06E-05 | 2.70E-03 |
| 6 | 2256 | F3 vs. L3 | - | Development | Development   | structural molecule activity                                      | GO:0005198 | F | 273  | 4.61E-09 | 7.37E-07 |
| 6 | 2257 | F3 vs. L3 | - | Metabolism  | Bioenergetics | DNA-dependent ATPase activity                                     | GO:0008094 | F | 63   | 3.16E-06 | 1.85E-04 |
| 6 | 2258 | F3 vs. L3 | - | Metabolism  | Bioenergetics | positive regulation of ATPase activity                            | GO:0032781 | P | 10   | 5.17E-03 | 4.07E-02 |
| 6 | 2259 | F3 vs. L3 | - | Metabolism  | Bioenergetics | regulation of ATPase activity                                     | GO:0043462 | P | 13   | 1.17E-03 | 1.23E-02 |
| 6 | 2260 | F3 vs. L3 | - | Metabolism  | Catabolism    | Cul4-RING E3 ubiquitin ligase complex                             | GO:0080008 | C | 95   | 2.83E-05 | 2.93E-04 |
| 6 | 2261 | F3 vs. L3 | - | Metabolism  | Catabolism    | cullin-RING ubiquitin ligase complex                              | GO:0031461 | C | 163  | 6.52E-08 | 1.02E-06 |
| 6 | 2262 | F3 vs. L3 | - | Metabolism  | Catabolism    | endopeptidase complex                                             | GO:1905369 | C | 44   | 9.77E-03 | 4.93E-02 |
| 6 | 2263 | F3 vs. L3 | - | Metabolism  | Catabolism    | modification-dependent macromolecule catabolic process            | GO:0043632 | P | 292  | 2.12E-04 | 2.94E-03 |
| 6 | 2264 | F3 vs. L3 | - | Metabolism  | Catabolism    | modification-dependent protein catabolic process                  | GO:0019941 | P | 286  | 2.36E-04 | 3.19E-03 |
| 6 | 2265 | F3 vs. L3 | - | Metabolism  | Catabolism    | peptidase complex                                                 | GO:1905368 | C | 55   | 4.36E-04 | 3.39E-03 |
| 6 | 2266 | F3 vs. L3 | - | Metabolism  | Catabolism    | proteasomal protein catabolic process                             | GO:0010498 | P | 160  | 2.54E-03 | 2.32E-02 |
|   |      |           |   |             |               | proteasome-mediated ubiquitin-dependent protein catabolic process | GO:0043161 | P | 153  | 3.73E-03 | 3.11E-02 |
| 6 | 2267 | F3 vs. L3 | - | Metabolism  | Catabolism    | protein-containing complex                                        | GO:0032991 | C | 1865 | 0.00E+00 | 0.00E+00 |
| 6 | 2268 | F3 vs. L3 | - | Metabolism  | Catabolism    | ubiquitin ligase complex                                          | GO:0000151 | C | 200  | 5.96E-08 | 9.51E-07 |
| 6 | 2269 | F3 vs. L3 | - | Metabolism  | Catabolism    | ubiquitin-dependent protein catabolic process                     | GO:0006511 | P | 283  | 2.15E-04 | 2.96E-03 |
| 6 | 2270 | F3 vs. L3 | - | Metabolism  | Metabolism    | acetyltransferase complex                                         | GO:1902493 | C | 30   | 4.16E-04 | 3.37E-03 |
| 6 | 2271 | F3 vs. L3 | - | Metabolism  | Metabolism    | amide biosynthetic process                                        | GO:0043604 | P | 370  | 7.02E-06 | 1.53E-04 |
| 6 | 2272 | F3 vs. L3 | - | Metabolism  | Metabolism    | catalytic activity, acting on DNA                                 | GO:0140097 | F | 116  | 1.01E-07 | 9.98E-06 |
| 6 | 2273 | F3 vs. L3 | - | Metabolism  | Metabolism    | catalytic complex                                                 | GO:1902494 | C | 732  | 3.33E-16 | 1.71E-14 |
| 6 | 2274 | F3 vs. L3 | - | Metabolism  | Metabolism    | cellular aromatic compound metabolic process                      | GO:0006725 | P | 1545 | 1.38E-08 | 6.37E-07 |
| 6 | 2275 | F3 vs. L3 | - | Metabolism  | Metabolism    | cellular macromolecule biosynthetic process                       | GO:0034645 | P | 784  | 1.91E-10 | 1.21E-08 |
| 6 | 2276 | F3 vs. L3 | - | Metabolism  | Metabolism    | cellular macromolecule metabolic process                          | GO:0044260 | P | 2574 | 5.12E-11 | 3.73E-09 |
| 6 | 2277 | F3 vs. L3 | - | Metabolism  | Metabolism    | cellular nitrogen compound biosynthetic process                   | GO:0044271 | P | 777  | 5.45E-03 | 4.24E-02 |
| 6 | 2278 | F3 vs. L3 | - | Metabolism  | Metabolism    | cellular nitrogen compound metabolic process                      | GO:0034641 | P | 1758 | 7.77E-16 | 1.79E-13 |
| 6 | 2279 | F3 vs. L3 | - | Metabolism  | Metabolism    | cellular protein metabolic process                                | GO:0044267 | P | 1954 | 6.48E-07 | 1.86E-05 |
| 6 | 2280 | F3 vs. L3 | - | Metabolism  | Metabolism    | cellular protein modification process                             | GO:0006464 | P | 1413 | 7.19E-04 | 8.15E-03 |
| 6 | 2281 | F3 vs. L3 | - | Metabolism  | Metabolism    | cellular protein-containing complex assembly                      | GO:0034622 | P | 307  | 7.23E-07 | 2.01E-05 |
| 6 | 2282 | F3 vs. L3 | - | Metabolism  | Metabolism    | chromatin binding                                                 | GO:0003682 | F | 108  | 1.10E-03 | 2.31E-02 |
| 6 | 2283 | F3 vs. L3 | - | Metabolism  | Metabolism    | DNA binding                                                       | GO:0003677 | F | 848  | 1.18E-10 | 2.41E-08 |
| 6 | 2284 | F3 vs. L3 | - | Metabolism  | Metabolism    | DNA metabolic process                                             | GO:0006259 | P | 260  | 0.00E+00 | 0.00E+00 |
| 6 | 2285 | F3 vs. L3 | - | Metabolism  | Metabolism    | DNA secondary structure binding                                   | GO:0000217 | F | 25   | 1.89E-05 | 7.78E-04 |
| 6 | 2286 | F3 vs. L3 | - | Metabolism  | Metabolism    | double-stranded DNA binding                                       | GO:0003690 | F | 420  | 5.35E-04 | 1.33E-02 |
| 6 | 2287 | F3 vs. L3 | - | Metabolism  | Metabolism    | heterocycle metabolic process                                     | GO:0046483 | P | 1462 | 1.68E-12 | 1.69E-10 |
| 6 | 2288 | F3 vs. L3 | - | Metabolism  | Metabolism    | heterocyclic compound binding                                     | GO:1901363 | F | 2711 | 1.83E-03 | 3.39E-02 |
| 6 | 2289 | F3 vs. L3 | - | Metabolism  | Metabolism    | lysine N-methyltransferase activity                               | GO:0016278 | F | 26   | 2.41E-03 | 4.29E-02 |
| 6 | 2290 | F3 vs. L3 | - | Metabolism  | Metabolism    | macromolecule biosynthetic process                                | GO:0009059 | P | 824  | 3.90E-08 | 1.54E-06 |
| 6 | 2291 | F3 vs. L3 | - | Metabolism  | Metabolism    | macromolecule metabolic process                                   | GO:0043170 | P | 3227 | 6.66E-16 | 1.61E-13 |
| 6 | 2292 | F3 vs. L3 | - | Metabolism  | Metabolism    | methyltransferase activity                                        | GO:0008168 | F | 149  | 1.63E-03 | 3.18E-02 |
| 6 | 2293 | F3 vs. L3 | - | Metabolism  | Metabolism    | microtubule binding                                               | GO:0008017 | F | 95   | 1.10E-04 | 3.32E-03 |
| 6 | 2294 | F3 vs. L3 | - | Metabolism  | Metabolism    | microtubule polymerization or depolymerization                    | GO:0031109 | P | 12   | 3.25E-03 | 2.80E-02 |
| 6 | 2295 | F3 vs. L3 | - | Metabolism  | Metabolism    | nitrogen compound metabolic process                               | GO:0006807 | P | 3646 | 5.41E-06 | 1.24E-04 |
| 6 | 2296 | F3 vs. L3 | - | Metabolism  | Metabolism    | N-methyltransferase activity                                      | GO:0008170 | F | 54   | 1.57E-04 | 4.61E-03 |
| 6 | 2297 | F3 vs. L3 | - | Metabolism  | Metabolism    | nucleic acid binding                                              | GO:0003676 | F | 1881 | 8.10E-15 | 3.33E-12 |
| 6 | 2298 | F3 vs. L3 | - | Metabolism  | Metabolism    | organic cyclic compound binding                                   | GO:0097159 | F | 2724 | 1.45E-03 | 2.89E-02 |
| 6 | 2299 | F3 vs. L3 | - | Metabolism  | Metabolism    | organic cyclic compound metabolic process                         | GO:1901360 | P | 1608 | 3.92E-07 | 1.21E-05 |
| 6 | 2300 | F3 vs. L3 | - | Metabolism  | Metabolism    | peptide metabolic process                                         | GO:0006518 | P | 365  | 7.26E-06 | 1.57E-04 |
| 6 | 2301 | F3 vs. L3 | - | Metabolism  | Metabolism    | protein metabolic process                                         | GO:0019538 | P | 2049 | 6.16E-06 | 1.38E-04 |
| 6 | 2302 | F3 vs. L3 | - | Metabolism  | Metabolism    | pseudouridine synthesis                                           | GO:0001522 | P | 15   | 4.96E-04 | 6.08E-03 |
| 6 | 2303 | F3 vs. L3 | - | Metabolism  | Metabolism    | S-adenosylmethionine-dependent methyltransferase activity         | GO:0008757 | F | 118  | 2.61E-03 | 4.56E-02 |
| 6 | 2304 | F3 vs. L3 | - | Metabolism  | Metabolism    |                                                                   |            |   |      |          |          |

|   |      |           |   |            |                      |                                                                         |            |   |      |          |          |
|---|------|-----------|---|------------|----------------------|-------------------------------------------------------------------------|------------|---|------|----------|----------|
| 6 | 2305 | F3 vs. L3 | - | Metabolism | Metabolism           | Sm-like protein family complex                                          | GO:0120114 | C | 59   | 3.25E-10 | 7.19E-09 |
| 6 | 2306 | F3 vs. L3 | - | Metabolism | Metabolism           | supramolecular complex                                                  | GO:0099080 | C | 168  | 4.60E-06 | 5.60E-05 |
| 6 | 2307 | F3 vs. L3 | - | Metabolism | Metabolism           | supramolecular fiber                                                    | GO:0099512 | C | 104  | 1.93E-04 | 1.66E-03 |
| 6 | 2308 | F3 vs. L3 | - | Metabolism | Metabolism           | supramolecular polymer                                                  | GO:0099081 | C | 104  | 1.93E-04 | 1.69E-03 |
| 6 | 2309 | F3 vs. L3 | - | Metabolism | Metabolism           | transferase activity, transferring one-carbon groups                    | GO:0016741 | F | 161  | 1.81E-03 | 3.38E-02 |
| 6 | 2310 | F3 vs. L3 | - | Metabolism | Metabolism           | transferase complex                                                     | GO:1990234 | C | 437  | 0.00E+00 | 0.00E+00 |
|   |      |           |   |            |                      |                                                                         |            |   |      |          |          |
| 6 | 2311 | F3 vs. L3 | - | Metabolism | Metabolism           | transferase complex, transferring phosphorus-containing groups          | GO:0061695 | C | 140  | 1.46E-12 | 4.75E-11 |
| 6 | 2312 | F3 vs. L3 | - | Metabolism | Metabolism           | tubulin binding                                                         | GO:0015631 | F | 101  | 3.64E-05 | 1.41E-03 |
| 6 | 2313 | F3 vs. L3 | - | Metabolism | Transporters         | kinesin complex                                                         | GO:0005871 | C | 22   | 8.18E-03 | 4.32E-02 |
| 6 | 2314 | F3 vs. L3 | - | Metabolism | Transporters         | nuclear export                                                          | GO:0051168 | P | 39   | 2.74E-03 | 2.47E-02 |
| 6 | 2315 | F3 vs. L3 | - | Metabolism | Transporters         | nuclear microtubule                                                     | GO:0005880 | C | 9    | 6.03E-04 | 4.48E-03 |
| 6 | 2316 | F3 vs. L3 | - | Metabolism | Transporters         | nuclear transport                                                       | GO:0051169 | P | 66   | 2.02E-03 | 1.94E-02 |
| 6 | 2317 | F3 vs. L3 | - | Metabolism | Transporters         | nucleic acid transport                                                  | GO:0050657 | P | 41   | 1.11E-03 | 1.18E-02 |
| 6 | 2318 | F3 vs. L3 | - | Metabolism | Transporters         | nucleocytoplasmic transport                                             | GO:0006913 | P | 66   | 2.02E-03 | 1.94E-02 |
| 6 | 2319 | F3 vs. L3 | - | Metabolism | Transporters         | RNA transport                                                           | GO:0050658 | P | 41   | 1.11E-03 | 1.18E-02 |
| 6 | 2320 | F3 vs. L3 | - | Regulation | Protein modification | internal peptidyl-lysine acetylation                                    | GO:0018393 | P | 25   | 3.47E-03 | 2.94E-02 |
| 6 | 2321 | F3 vs. L3 | - | Regulation | Protein modification | internal protein amino acid acetylation                                 | GO:0006475 | P | 25   | 3.47E-03 | 2.95E-02 |
| 6 | 2322 | F3 vs. L3 | - | Regulation | Protein modification | methylation                                                             | GO:0032259 | P | 136  | 2.11E-07 | 7.00E-06 |
| 6 | 2323 | F3 vs. L3 | - | Regulation | Protein modification | oligosaccharyltransferase complex                                       | GO:0008250 | C | 9    | 4.95E-03 | 2.77E-02 |
| 6 | 2324 | F3 vs. L3 | - | Regulation | Protein modification | peptidyl-lysine acetylation                                             | GO:0018394 | P | 25   | 3.47E-03 | 2.95E-02 |
| 6 | 2325 | F3 vs. L3 | - | Regulation | Protein modification | protein alkylation                                                      | GO:0008213 | P | 52   | 7.37E-06 | 1.58E-04 |
| 6 | 2326 | F3 vs. L3 | - | Regulation | Protein modification | protein heterodimerization activity                                     | GO:0046982 | F | 79   | 3.23E-06 | 1.82E-04 |
| 6 | 2327 | F3 vs. L3 | - | Regulation | Protein modification | protein methylation                                                     | GO:0006479 | P | 52   | 7.37E-06 | 1.59E-04 |
| 6 | 2328 | F3 vs. L3 | - | Regulation | Protein modification | protein methyltransferase activity                                      | GO:0008276 | F | 45   | 8.81E-05 | 2.85E-03 |
| 6 | 2329 | F3 vs. L3 | - | Regulation | Protein modification | protein-lysine N-methyltransferase activity                             | GO:0016279 | F | 26   | 2.41E-03 | 4.31E-02 |
| 6 | 2330 | F3 vs. L3 | - | Regulation | Protein modification | regulation of protein metabolic process                                 | GO:0051246 | P | 237  | 8.27E-05 | 1.32E-03 |
| 6 | 2331 | F3 vs. L3 | - | Regulation | Protein modification | peptidyl-amino acid modification                                        | GO:0018193 | P | 231  | 2.19E-03 | 2.06E-02 |
| 6 | 2332 | F3 vs. L3 | - | Regulation | Protein modification | peptidyl-lysine modification                                            | GO:0018205 | P | 80   | 7.84E-07 | 2.16E-05 |
| 6 | 2333 | F3 vs. L3 | - | Regulation | Protein modification | positive regulation of protein modification process                     | GO:0031401 | P | 38   | 8.36E-04 | 9.22E-03 |
| 6 | 2334 | F3 vs. L3 | - | Regulation | Protein modification | protein modification by small protein conjugation or removal            | GO:0070647 | P | 420  | 1.38E-03 | 1.42E-02 |
| 6 | 2335 | F3 vs. L3 | - | Regulation | Protein modification | protein modification process                                            | GO:0036211 | P | 1413 | 7.19E-04 | 8.16E-03 |
| 6 | 2336 | F3 vs. L3 | - | Regulation | Protein modification | protein-containing complex assembly                                     | GO:0065003 | P | 344  | 5.97E-06 | 1.34E-04 |
| 6 | 2337 | F3 vs. L3 | - | Regulation | Protein modification | protein-containing complex localization                                 | GO:0031503 | P | 37   | 4.38E-03 | 3.53E-02 |
| 6 | 2338 | F3 vs. L3 | - | Regulation | Protein modification | protein-containing complex subunit organization                         | GO:0043933 | P | 393  | 3.48E-05 | 6.07E-04 |
| 6 | 2339 | F3 vs. L3 | - | Regulation | Protein modification | regulation of protein modification process                              | GO:0031399 | P | 117  | 1.72E-04 | 2.49E-03 |
| 6 | 2340 | F3 vs. L3 | - | Regulation | Regulation           | negative regulation of biological process                               | GO:0048519 | P | 701  | 7.16E-08 | 2.68E-06 |
| 6 | 2341 | F3 vs. L3 | - | Regulation | Regulation           | negative regulation of biosynthetic process                             | GO:0009890 | P | 218  | 4.99E-05 | 8.39E-04 |
| 6 | 2342 | F3 vs. L3 | - | Regulation | Regulation           | negative regulation of cellular biosynthetic process                    | GO:0031327 | P | 214  | 3.47E-05 | 6.06E-04 |
|   |      |           |   |            |                      |                                                                         |            |   |      |          |          |
| 6 | 2343 | F3 vs. L3 | - | Regulation | Regulation           | negative regulation of cellular macromolecule biosynthetic process      | GO:2000113 | P | 200  | 7.54E-06 | 1.61E-04 |
| 6 | 2344 | F3 vs. L3 | - | Regulation | Regulation           | negative regulation of cellular metabolic process                       | GO:0031324 | P | 287  | 9.84E-06 | 1.98E-04 |
| 6 | 2345 | F3 vs. L3 | - | Regulation | Regulation           | negative regulation of cellular process                                 | GO:0048523 | P | 463  | 3.16E-07 | 1.01E-05 |
| 6 | 2346 | F3 vs. L3 | - | Regulation | Regulation           | negative regulation of DNA metabolic process                            | GO:0051053 | P | 17   | 7.38E-04 | 8.31E-03 |
| 6 | 2347 | F3 vs. L3 | - | Regulation | Regulation           | negative regulation of macromolecule biosynthetic process               | GO:0010558 | P | 202  | 1.04E-05 | 2.07E-04 |
| 6 | 2348 | F3 vs. L3 | - | Regulation | Regulation           | negative regulation of macromolecule metabolic process                  | GO:0010605 | P | 372  | 8.64E-12 | 8.12E-10 |
| 6 | 2349 | F3 vs. L3 | - | Regulation | Regulation           | negative regulation of metabolic process                                | GO:0009892 | P | 406  | 1.23E-09 | 6.81E-08 |
| 6 | 2350 | F3 vs. L3 | - | Regulation | Regulation           | negative regulation of nitrogen compound metabolic process              | GO:0051172 | P | 253  | 2.15E-07 | 7.08E-06 |
|   |      |           |   |            |                      |                                                                         |            |   |      |          |          |
| 6 | 2351 | F3 vs. L3 | - | Regulation | Regulation           | negative regulation of nucleobase-containing compound metabolic process | GO:0045934 | P | 178  | 1.85E-07 | 6.34E-06 |
| 6 | 2352 | F3 vs. L3 | - | Regulation | Regulation           | positive regulation of macromolecule metabolic process                  | GO:0010604 | P | 396  | 3.72E-04 | 4.70E-03 |
| 6 | 2353 | F3 vs. L3 | - | Regulation | Regulation           | regulation of biological process                                        | GO:0050789 | P | 2947 | 1.94E-04 | 2.74E-03 |
| 6 | 2354 | F3 vs. L3 | - | Regulation | Regulation           | regulation of biosynthetic process                                      | GO:0009889 | P | 1270 | 8.61E-06 | 1.79E-04 |
| 6 | 2355 | F3 vs. L3 | - | Regulation | Regulation           | regulation of cellular biosynthetic process                             | GO:0031326 | P | 1244 | 2.96E-06 | 7.29E-05 |
| 6 | 2356 | F3 vs. L3 | - | Regulation | Regulation           | regulation of cellular macromolecule biosynthetic process               | GO:2000112 | P | 1173 | 1.85E-08 | 8.00E-07 |
| 6 | 2357 | F3 vs. L3 | - | Regulation | Regulation           | regulation of cellular metabolic process                                | GO:0031323 | P | 1546 | 8.35E-07 | 2.26E-05 |
| 6 | 2358 | F3 vs. L3 | - | Regulation | Regulation           | regulation of cellular process                                          | GO:0050794 | P | 2562 | 8.30E-04 | 9.21E-03 |
| 6 | 2359 | F3 vs. L3 | - | Regulation | Regulation           | regulation of cellular protein metabolic process                        | GO:0032268 | P | 225  | 2.98E-04 | 3.89E-03 |
| 6 | 2360 | F3 vs. L3 | - | Regulation | Regulation           | regulation of macromolecule biosynthetic process                        | GO:0010556 | P | 1181 | 1.57E-08 | 6.98E-07 |
| 6 | 2361 | F3 vs. L3 | - | Regulation | Regulation           | regulation of macromolecule metabolic process                           | GO:0060255 | P | 1560 | 6.66E-15 | 1.12E-12 |
| 6 | 2362 | F3 vs. L3 | - | Regulation | Regulation           | regulation of meristem structural organization                          | GO:0009934 | P | 17   | 3.53E-03 | 2.98E-02 |
| 6 | 2363 | F3 vs. L3 | - | Regulation | Regulation           | regulation of metabolic process                                         | GO:0019222 | P | 1745 | 1.30E-09 | 7.14E-08 |
| 6 | 2364 | F3 vs. L3 | - | Regulation | Regulation           | regulation of nitrogen compound metabolic process                       | GO:0051171 | P | 1393 | 2.18E-09 | 1.15E-07 |

|   |      |           |   |            |               |                                                                  |            |   |      |          |          |
|---|------|-----------|---|------------|---------------|------------------------------------------------------------------|------------|---|------|----------|----------|
| 6 | 2365 | F3 vs. L3 | - | Regulation | Regulation    | regulation of nucleobase-containing compound metabolic process   | GO:0019219 | P | 1160 | 2.35E-08 | 9.86E-07 |
| 6 | 2366 | F3 vs. L3 | - | Regulation | Regulation    | regulation of organelle organization                             | GO:0033043 | P | 116  | 5.31E-05 | 8.86E-04 |
| 6 | 2367 | F3 vs. L3 | - | Regulation | Regulation    | regulation of primary metabolic process                          | GO:0080090 | P | 1444 | 3.94E-08 | 1.54E-06 |
| 6 | 2368 | F3 vs. L3 | - | Regulation | Regulation    | regulation of transferase activity                               | GO:0051338 | P | 61   | 3.07E-05 | 5.46E-04 |
|   |      |           |   |            |               | chromatin organization involved in negative regulation of        |            |   |      |          |          |
| 6 | 2369 | F3 vs. L3 | - | Regulation | Transcription | transcription                                                    | GO:0097549 | P | 44   | 1.93E-07 | 6.57E-06 |
| 6 | 2370 | F3 vs. L3 | - | Regulation | Transcription | chromatin organization involved in regulation of transcription   | GO:0034401 | P | 44   | 1.93E-07 | 6.53E-06 |
| 6 | 2371 | F3 vs. L3 | - | Regulation | Transcription | chromatin remodeling                                             | GO:0006338 | P | 51   | 4.23E-04 | 5.24E-03 |
| 6 | 2372 | F3 vs. L3 | - | Regulation | Transcription | chromatin silencing                                              | GO:0006342 | P | 27   | 7.10E-06 | 1.54E-04 |
| 6 | 2373 | F3 vs. L3 | - | Regulation | Transcription | core mediator complex                                            | GO:0070847 | C | 7    | 4.67E-03 | 2.66E-02 |
| 6 | 2374 | F3 vs. L3 | - | Regulation | Transcription | covalent chromatin modification                                  | GO:0016569 | P | 101  | 9.52E-08 | 3.52E-06 |
| 6 | 2375 | F3 vs. L3 | - | Regulation | Transcription | DNA conformation change                                          | GO:0071103 | P | 90   | 3.12E-05 | 5.52E-04 |
| 6 | 2376 | F3 vs. L3 | - | Regulation | Transcription | DNA modification                                                 | GO:0006304 | P | 30   | 2.69E-03 | 2.43E-02 |
| 6 | 2377 | F3 vs. L3 | - | Regulation | Transcription | DNA-binding transcription activator activity                     | GO:0001216 | F | 23   | 7.36E-04 | 1.69E-02 |
|   |      |           |   |            |               | DNA-binding transcription activator activity, RNA polymerase II- |            |   |      |          |          |
| 6 | 2378 | F3 vs. L3 | - | Regulation | Transcription | specific                                                         | GO:0001228 | F | 19   | 3.77E-04 | 9.76E-03 |
| 6 | 2379 | F3 vs. L3 | - | Regulation | Transcription | DNA-directed RNA polymerase complex                              | GO:0000428 | C | 77   | 1.24E-06 | 1.68E-05 |
| 6 | 2380 | F3 vs. L3 | - | Regulation | Transcription | dsRNA processing                                                 | GO:0031050 | P | 43   | 6.25E-08 | 2.40E-06 |
| 6 | 2381 | F3 vs. L3 | - | Regulation | Transcription | gene expression                                                  | GO:0010467 | P | 987  | 0.00E+00 | 0.00E+00 |
| 6 | 2382 | F3 vs. L3 | - | Regulation | Transcription | gene silencing                                                   | GO:0016458 | P | 112  | 3.25E-11 | 2.53E-09 |
| 6 | 2383 | F3 vs. L3 | - | Regulation | Transcription | gene silencing by miRNA                                          | GO:0035195 | P | 26   | 3.08E-03 | 2.70E-02 |
| 6 | 2384 | F3 vs. L3 | - | Regulation | Transcription | gene silencing by RNA                                            | GO:0031047 | P | 75   | 3.92E-08 | 1.54E-06 |
| 6 | 2385 | F3 vs. L3 | - | Regulation | Transcription | gene silencing by RNA-directed DNA methylation                   | GO:0080188 | P | 13   | 1.88E-03 | 1.83E-02 |
| 6 | 2386 | F3 vs. L3 | - | Regulation | Transcription | heterochromatin assembly by small RNA                            | GO:0031048 | P | 9    | 1.32E-03 | 1.36E-02 |
| 6 | 2387 | F3 vs. L3 | - | Regulation | Transcription | histone acetylation                                              | GO:0016573 | P | 25   | 3.47E-03 | 2.96E-02 |
| 6 | 2388 | F3 vs. L3 | - | Regulation | Transcription | histone acetyltransferase complex                                | GO:0000123 | C | 23   | 2.70E-03 | 1.63E-02 |
| 6 | 2389 | F3 vs. L3 | - | Regulation | Transcription | histone binding                                                  | GO:0042393 | F | 62   | 4.11E-05 | 1.58E-03 |
| 6 | 2390 | F3 vs. L3 | - | Regulation | Transcription | histone lysine methylation                                       | GO:0034968 | P | 29   | 1.31E-04 | 1.96E-03 |
| 6 | 2391 | F3 vs. L3 | - | Regulation | Transcription | histone methylation                                              | GO:0016571 | P | 36   | 2.72E-05 | 4.91E-04 |
| 6 | 2392 | F3 vs. L3 | - | Regulation | Transcription | histone methyltransferase activity                               | GO:0042054 | F | 25   | 1.09E-04 | 3.33E-03 |
| 6 | 2393 | F3 vs. L3 | - | Regulation | Transcription | histone modification                                             | GO:0016570 | P | 97   | 1.16E-07 | 4.20E-06 |
| 6 | 2394 | F3 vs. L3 | - | Regulation | Transcription | histone-lysine N-methyltransferase activity                      | GO:0018024 | F | 18   | 2.10E-03 | 3.83E-02 |
| 6 | 2395 | F3 vs. L3 | - | Regulation | Transcription | macromolecule methylation                                        | GO:0043414 | P | 107  | 3.81E-10 | 2.35E-08 |
| 6 | 2396 | F3 vs. L3 | - | Regulation | Transcription | macromolecule modification                                       | GO:0043412 | P | 1596 | 1.44E-08 | 6.58E-07 |
| 6 | 2397 | F3 vs. L3 | - | Regulation | Transcription | maintenance of DNA repeat elements                               | GO:0043570 | P | 6    | 2.10E-03 | 2.00E-02 |
| 6 | 2398 | F3 vs. L3 | - | Regulation | Transcription | mediator complex                                                 | GO:0016592 | C | 33   | 1.15E-03 | 7.67E-03 |
| 6 | 2399 | F3 vs. L3 | - | Regulation | Transcription | methylated histone binding                                       | GO:0035064 | F | 15   | 1.11E-03 | 2.29E-02 |
| 6 | 2400 | F3 vs. L3 | - | Regulation | Transcription | methylation-dependent protein binding                            | GO:0140034 | F | 15   | 1.11E-03 | 2.31E-02 |
| 6 | 2401 | F3 vs. L3 | - | Regulation | Transcription | methyltransferase complex                                        | GO:0034708 | C | 22   | 1.27E-03 | 8.23E-03 |
| 6 | 2402 | F3 vs. L3 | - | Regulation | Transcription | minor groove of adenine-thymine-rich DNA binding                 | GO:0003680 | F | 18   | 8.46E-05 | 2.80E-03 |
| 6 | 2403 | F3 vs. L3 | - | Regulation | Transcription | mRNA polyadenylation                                             | GO:0006378 | P | 16   | 4.38E-03 | 3.53E-02 |
| 6 | 2404 | F3 vs. L3 | - | Regulation | Transcription | mRNA processing                                                  | GO:0006397 | P | 191  | 2.32E-13 | 2.74E-11 |
| 6 | 2405 | F3 vs. L3 | - | Regulation | Transcription | negative regulation of gene expression                           | GO:0010629 | P | 302  | 4.88E-09 | 2.41E-07 |
| 6 | 2406 | F3 vs. L3 | - | Regulation | Transcription | negative regulation of gene expression, epigenetic               | GO:0045814 | P | 28   | 3.26E-06 | 7.86E-05 |
| 6 | 2407 | F3 vs. L3 | - | Regulation | Transcription | negative regulation of nucleic acid-templated transcription      | GO:1903507 | P | 154  | 3.21E-05 | 5.64E-04 |
| 6 | 2408 | F3 vs. L3 | - | Regulation | Transcription | negative regulation of RNA biosynthetic process                  | GO:1902679 | P | 154  | 3.21E-05 | 5.66E-04 |
| 6 | 2409 | F3 vs. L3 | - | Regulation | Transcription | negative regulation of transcription, DNA-templated              | GO:0045892 | P | 152  | 2.24E-05 | 4.08E-04 |
| 6 | 2410 | F3 vs. L3 | - | Regulation | Transcription | nuclear DNA-directed RNA polymerase complex                      | GO:0055029 | C | 70   | 3.02E-07 | 4.33E-06 |
| 6 | 2411 | F3 vs. L3 | - | Regulation | Transcription | nuclear speck                                                    | GO:0016607 | C | 44   | 3.85E-04 | 3.20E-03 |
| 6 | 2412 | F3 vs. L3 | - | Regulation | Transcription | nucleic acid-templated transcription                             | GO:0097659 | P | 143  | 2.50E-04 | 3.34E-03 |
| 6 | 2413 | F3 vs. L3 | - | Regulation | Transcription | nucleolus                                                        | GO:0005730 | C | 339  | 2.22E-16 | 1.20E-14 |
| 6 | 2414 | F3 vs. L3 | - | Regulation | Transcription | nucleosome organization                                          | GO:0034728 | P | 44   | 1.94E-03 | 1.86E-02 |
| 6 | 2415 | F3 vs. L3 | - | Regulation | Transcription | peptidyl-lysine methylation                                      | GO:0018022 | P | 36   | 4.59E-05 | 7.75E-04 |
| 6 | 2416 | F3 vs. L3 | - | Regulation | Transcription | post-transcriptional gene silencing by RNA                       | GO:0035194 | P | 55   | 3.11E-06 | 7.60E-05 |
| 6 | 2417 | F3 vs. L3 | - | Regulation | Transcription | pre-transcriptional gene silencing by RNA                        | GO:0140458 | P | 13   | 1.88E-03 | 1.84E-02 |
| 6 | 2418 | F3 vs. L3 | - | Regulation | Transcription | production of siRNA involved in RNA interference                 | GO:0030422 | P | 29   | 4.24E-05 | 7.24E-04 |
| 6 | 2419 | F3 vs. L3 | - | Regulation | Transcription | production of small RNA involved in gene silencing by RNA        | GO:0070918 | P | 43   | 6.25E-08 | 2.39E-06 |
| 6 | 2420 | F3 vs. L3 | - | Regulation | Transcription | production of ta-siRNAs involved in RNA interference             | GO:0010267 | P | 14   | 6.04E-03 | 4.60E-02 |
| 6 | 2421 | F3 vs. L3 | - | Regulation | Transcription | protein acetylation                                              | GO:0006473 | P | 33   | 2.87E-04 | 3.78E-03 |
| 6 | 2422 | F3 vs. L3 | - | Regulation | Transcription | protein acetyltransferase complex                                | GO:0031248 | C | 30   | 4.16E-04 | 3.35E-03 |
| 6 | 2423 | F3 vs. L3 | - | Regulation | Transcription | protein acylation                                                | GO:0043543 | P | 50   | 2.82E-04 | 3.72E-03 |
| 6 | 2424 | F3 vs. L3 | - | Regulation | Transcription | protein-DNA complex                                              | GO:0032993 | C | 40   | 3.99E-05 | 3.88E-04 |
| 6 | 2425 | F3 vs. L3 | - | Regulation | Transcription | protein-DNA complex assembly                                     | GO:0065004 | P | 50   | 8.24E-06 | 1.73E-04 |

|   |      |           |   |            |               |                                                                                          |            |   |      |          |          |
|---|------|-----------|---|------------|---------------|------------------------------------------------------------------------------------------|------------|---|------|----------|----------|
| 6 | 2426 | F3 vs. L3 | - | Regulation | Transcription | protein-DNA complex subunit organization                                                 | GO:0071824 | P | 62   | 1.79E-05 | 3.35E-04 |
| 6 | 2427 | F3 vs. L3 | - | Regulation | Transcription | regulation of gene expression                                                            | GO:0010468 | P | 1356 | 3.23E-11 | 2.56E-09 |
| 6 | 2428 | F3 vs. L3 | - | Regulation | Transcription | regulation of gene expression, epigenetic                                                | GO:0040029 | P | 52   | 2.63E-06 | 6.55E-05 |
| 6 | 2429 | F3 vs. L3 | - | Regulation | Transcription | regulation of gene silencing                                                             | GO:0060968 | P | 34   | 2.53E-03 | 2.31E-02 |
| 6 | 2430 | F3 vs. L3 | - | Regulation | Transcription | regulation of nucleic acid-templated transcription                                       | GO:1903506 | P | 1060 | 3.76E-07 | 1.17E-05 |
| 6 | 2431 | F3 vs. L3 | - | Regulation | Transcription | regulation of RNA biosynthetic process                                                   | GO:2001141 | P | 1061 | 4.43E-07 | 1.36E-05 |
| 6 | 2432 | F3 vs. L3 | - | Regulation | Transcription | regulation of transcription by RNA polymerase II                                         | GO:0006357 | P | 237  | 2.10E-03 | 2.00E-02 |
| 6 | 2433 | F3 vs. L3 | - | Regulation | Transcription | regulation of transcription, DNA-templated                                               | GO:0006355 | P | 1060 | 3.76E-07 | 1.18E-05 |
| 6 | 2434 | F3 vs. L3 | - | Regulation | Transcription | RNA 3'-end processing                                                                    | GO:0031123 | P | 44   | 2.46E-06 | 6.18E-05 |
| 6 | 2435 | F3 vs. L3 | - | Regulation | Transcription | RNA binding                                                                              | GO:0003723 | F | 1000 | 1.88E-05 | 7.95E-04 |
| 6 | 2436 | F3 vs. L3 | - | Regulation | Transcription | RNA biosynthetic process                                                                 | GO:0032774 | P | 145  | 1.31E-04 | 1.96E-03 |
| 6 | 2437 | F3 vs. L3 | - | Regulation | Transcription | RNA methylation                                                                          | GO:0001510 | P | 41   | 3.19E-06 | 7.72E-05 |
| 6 | 2438 | F3 vs. L3 | - | Regulation | Transcription | RNA modification                                                                         | GO:0009451 | P | 163  | 6.33E-15 | 1.10E-12 |
| 6 | 2439 | F3 vs. L3 | - | Regulation | Transcription | RNA polymerase complex                                                                   | GO:0030880 | C | 80   | 4.52E-07 | 6.37E-06 |
| 6 | 2440 | F3 vs. L3 | - | Regulation | Transcription | RNA polymerase II, core complex                                                          | GO:0005665 | C | 13   | 6.28E-03 | 3.45E-02 |
| 6 | 2441 | F3 vs. L3 | - | Regulation | Transcription | RNA polymerase II, holoenzyme                                                            | GO:0016591 | C | 42   | 8.26E-04 | 5.74E-03 |
| 6 | 2442 | F3 vs. L3 | - | Regulation | Transcription | RNA polymerase III complex                                                               | GO:0005666 | C | 18   | 7.41E-03 | 3.98E-02 |
| 6 | 2443 | F3 vs. L3 | - | Regulation | Transcription | RNA polymerase IV complex                                                                | GO:0000418 | C | 10   | 8.78E-03 | 4.57E-02 |
| 6 | 2444 | F3 vs. L3 | - | Regulation | Transcription | RNA polymerase V complex                                                                 | GO:0000419 | C | 16   | 1.28E-05 | 1.42E-04 |
| 6 | 2445 | F3 vs. L3 | - | Regulation | Transcription | siRNA binding                                                                            | GO:0035197 | F | 4    | 1.04E-03 | 2.22E-02 |
| 6 | 2446 | F3 vs. L3 | - | Regulation | Transcription | THO complex                                                                              | GO:0000347 | C | 11   | 3.75E-04 | 3.14E-03 |
| 6 | 2447 | F3 vs. L3 | - | Regulation | Transcription | transcription coregulator activity                                                       | GO:0003712 | F | 81   | 7.53E-06 | 4.01E-04 |
| 6 | 2448 | F3 vs. L3 | - | Regulation | Transcription | transcription regulator complex                                                          | GO:0005667 | C | 73   | 1.07E-03 | 7.18E-03 |
| 6 | 2449 | F3 vs. L3 | - | Regulation | Transcription | transcription, DNA-templated                                                             | GO:0006351 | P | 143  | 2.50E-04 | 3.34E-03 |
| 6 | 2450 | F3 vs. L3 | - | Regulation | Translation   | box C/D snoRNP complex                                                                   | GO:0031428 | C | 10   | 1.90E-03 | 1.18E-02 |
| 6 | 2451 | F3 vs. L3 | - | Regulation | Translation   | catalytic activity, acting on RNA                                                        | GO:0140098 | F | 278  | 4.90E-07 | 3.71E-05 |
| 6 | 2452 | F3 vs. L3 | - | Regulation | Translation   | catalytic step 2 spliceosome                                                             | GO:0071013 | C | 39   | 6.22E-06 | 7.12E-05 |
| 6 | 2453 | F3 vs. L3 | - | Regulation | Translation   | cytosolic large ribosomal subunit                                                        | GO:0022625 | C | 94   | 2.58E-08 | 4.25E-07 |
| 6 | 2454 | F3 vs. L3 | - | Regulation | Translation   | cytosolic ribosome                                                                       | GO:0022626 | C | 214  | 2.84E-05 | 2.88E-04 |
| 6 | 2455 | F3 vs. L3 | - | Regulation | Translation   | cytosolic small ribosomal subunit                                                        | GO:0022627 | C | 68   | 2.94E-06 | 3.62E-05 |
| 6 | 2456 | F3 vs. L3 | - | Regulation | Translation   | double-stranded RNA binding                                                              | GO:0003725 | F | 15   | 2.83E-03 | 4.88E-02 |
| 6 | 2457 | F3 vs. L3 | - | Regulation | Translation   | establishment of RNA localization                                                        | GO:0051236 | P | 41   | 1.11E-03 | 1.18E-02 |
| 6 | 2458 | F3 vs. L3 | - | Regulation | Translation   | large ribosomal subunit                                                                  | GO:0015934 | C | 128  | 2.08E-10 | 5.07E-09 |
| 6 | 2459 | F3 vs. L3 | - | Regulation | Translation   | maturation of LSU-rRNA                                                                   | GO:0000470 | P | 32   | 9.36E-04 | 1.02E-02 |
| 6 | 2460 | F3 vs. L3 | - | Regulation | Translation   | maturation of SSU-rRNA                                                                   | GO:0030490 | P | 38   | 2.99E-05 | 5.35E-04 |
| 6 | 2461 | F3 vs. L3 | - | Regulation | Translation   | maturation of SSU-rRNA from tricistronic rRNA transcript (SSU-rRNA, 5.8S rRNA, LSU-rRNA) | GO:0000462 | P | 26   | 3.77E-04 | 4.76E-03 |
| 6 | 2462 | F3 vs. L3 | - | Regulation | Translation   | mitochondrial large ribosomal subunit                                                    | GO:0005762 | C | 19   | 1.18E-03 | 7.78E-03 |
| 6 | 2463 | F3 vs. L3 | - | Regulation | Translation   | mitochondrial ribosome                                                                   | GO:0005761 | C | 28   | 7.99E-04 | 5.59E-03 |
| 6 | 2464 | F3 vs. L3 | - | Regulation | Translation   | mRNA 3'-end processing                                                                   | GO:0031124 | P | 20   | 2.59E-03 | 2.36E-02 |
| 6 | 2465 | F3 vs. L3 | - | Regulation | Translation   | mRNA cleavage factor complex                                                             | GO:0005849 | C | 11   | 4.69E-04 | 3.62E-03 |
| 6 | 2466 | F3 vs. L3 | - | Regulation | Translation   | mRNA export from nucleus                                                                 | GO:0006406 | P | 20   | 6.46E-04 | 7.48E-03 |
| 6 | 2467 | F3 vs. L3 | - | Regulation | Translation   | mRNA metabolic process                                                                   | GO:0016071 | P | 263  | 1.51E-11 | 1.35E-09 |
| 6 | 2468 | F3 vs. L3 | - | Regulation | Translation   | mRNA splicing, via spliceosome                                                           | GO:0000398 | P | 138  | 3.96E-11 | 3.05E-09 |
| 6 | 2469 | F3 vs. L3 | - | Regulation | Translation   | mRNA transport                                                                           | GO:0051028 | P | 21   | 2.27E-04 | 3.11E-03 |
| 6 | 2470 | F3 vs. L3 | - | Regulation | Translation   | mRNA-containing ribonucleoprotein complex export from nucleus                            | GO:0071427 | P | 20   | 6.46E-04 | 7.49E-03 |
| 6 | 2471 | F3 vs. L3 | - | Regulation | Translation   | ncRNA 3'-end processing                                                                  | GO:0043628 | P | 21   | 6.56E-04 | 7.58E-03 |
| 6 | 2472 | F3 vs. L3 | - | Regulation | Translation   | ncRNA metabolic process                                                                  | GO:0034660 | P | 290  | 2.53E-12 | 2.50E-10 |
| 6 | 2473 | F3 vs. L3 | - | Regulation | Translation   | ncRNA processing                                                                         | GO:0034470 | P | 245  | 1.17E-13 | 1.58E-11 |
| 6 | 2474 | F3 vs. L3 | - | Regulation | Translation   | negative regulation of RNA metabolic process                                             | GO:0051253 | P | 161  | 1.11E-05 | 2.16E-04 |
| 6 | 2475 | F3 vs. L3 | - | Regulation | Translation   | organellar large ribosomal subunit                                                       | GO:0000315 | C | 30   | 1.67E-03 | 1.05E-02 |
| 6 | 2476 | F3 vs. L3 | - | Regulation | Translation   | organellar ribosome                                                                      | GO:0000313 | C | 46   | 7.07E-04 | 5.18E-03 |
| 6 | 2477 | F3 vs. L3 | - | Regulation | Translation   | peptide biosynthetic process                                                             | GO:0043043 | P | 322  | 7.47E-09 | 3.63E-07 |
| 6 | 2478 | F3 vs. L3 | - | Regulation | Translation   | posttranscriptional gene silencing                                                       | GO:0016441 | P | 60   | 3.15E-06 | 7.66E-05 |
| 6 | 2479 | F3 vs. L3 | - | Regulation | Translation   | posttranscriptional regulation of gene expression                                        | GO:0010608 | P | 152  | 2.17E-05 | 3.98E-04 |
| 6 | 2480 | F3 vs. L3 | - | Regulation | Translation   | precatalytic spliceosome                                                                 | GO:0071011 | C | 24   | 1.27E-06 | 1.69E-05 |
| 6 | 2481 | F3 vs. L3 | - | Regulation | Translation   | preribosome                                                                              | GO:0030684 | C | 62   | 6.06E-06 | 7.02E-05 |
| 6 | 2482 | F3 vs. L3 | - | Regulation | Translation   | prespliceosome                                                                           | GO:0071010 | C | 17   | 7.39E-04 | 5.29E-03 |
| 6 | 2483 | F3 vs. L3 | - | Regulation | Translation   | production of miRNAs involved in gene silencing by miRNA                                 | GO:0035196 | P | 19   | 9.23E-04 | 1.01E-02 |
| 6 | 2484 | F3 vs. L3 | - | Regulation | Translation   | regulation of RNA metabolic process                                                      | GO:0051252 | P | 1129 | 5.77E-07 | 1.70E-05 |
| 6 | 2485 | F3 vs. L3 | - | Regulation | Translation   | regulatory RNA binding                                                                   | GO:0061980 | F | 6    | 2.91E-04 | 7.60E-03 |
| 6 | 2486 | F3 vs. L3 | - | Regulation | Translation   | ribonucleoprotein complex                                                                | GO:1990904 | C | 443  | 0.00E+00 | 0.00E+00 |
| 6 | 2487 | F3 vs. L3 | - | Regulation | Translation   | ribonucleoprotein complex assembly                                                       | GO:0022618 | P | 121  | 1.57E-08 | 6.93E-07 |



|   |      |           |   |                        |             |                                                                |            |   |     |          |          |
|---|------|-----------|---|------------------------|-------------|----------------------------------------------------------------|------------|---|-----|----------|----------|
| 6 | 2488 | F3 vs. L3 | - | Regulation             | Translation | ribonucleoprotein complex biogenesis                           | GO:0022613 | P | 295 | 1.69E-14 | 2.53E-12 |
| 6 | 2489 | F3 vs. L3 | - | Regulation             | Translation | ribonucleoprotein complex subunit organization                 | GO:0071826 | P | 124 | 2.18E-08 | 9.30E-07 |
| 6 | 2490 | F3 vs. L3 | - | Regulation             | Translation | ribosomal large subunit assembly                               | GO:0000027 | P | 34  | 7.13E-04 | 8.14E-03 |
| 6 | 2491 | F3 vs. L3 | - | Regulation             | Translation | ribosomal large subunit biogenesis                             | GO:0042273 | P | 76  | 1.78E-07 | 6.12E-06 |
| 6 | 2492 | F3 vs. L3 | - | Regulation             | Translation | ribosomal small subunit biogenesis                             | GO:0042274 | P | 62  | 5.71E-06 | 1.30E-04 |
| 6 | 2493 | F3 vs. L3 | - | Regulation             | Translation | ribosomal subunit                                              | GO:0044391 | C | 214 | 3.33E-16 | 1.54E-14 |
| 6 | 2494 | F3 vs. L3 | - | Regulation             | Translation | ribosome                                                       | GO:0005840 | C | 274 | 2.00E-07 | 2.95E-06 |
| 6 | 2495 | F3 vs. L3 | - | Regulation             | translation | ribosome assembly                                              | GO:0042255 | P | 65  | 3.91E-04 | 4.90E-03 |
| 6 | 2496 | F3 vs. L3 | - | Regulation             | Translation | ribosome biogenesis                                            | GO:0042254 | P | 239 | 6.79E-11 | 4.70E-09 |
| 6 | 2497 | F3 vs. L3 | - | Regulation             | Translation | RNA cap binding                                                | GO:0000339 | F | 7   | 1.26E-03 | 2.55E-02 |
| 6 | 2498 | F3 vs. L3 | - | Regulation             | Translation | RNA export from nucleus                                        | GO:0006405 | P | 37  | 1.92E-03 | 1.85E-02 |
| 6 | 2499 | F3 vs. L3 | - | Regulation             | Translation | RNA interference                                               | GO:0016246 | P | 31  | 2.55E-04 | 3.38E-03 |
| 6 | 2500 | F3 vs. L3 | - | Regulation             | Translation | RNA localization                                               | GO:0006403 | P | 47  | 3.59E-04 | 4.57E-03 |
| 6 | 2501 | F3 vs. L3 | - | Regulation             | Translation | RNA methyltransferase activity                                 | GO:0008173 | F | 41  | 5.14E-06 | 2.85E-04 |
| 6 | 2502 | F3 vs. L3 | - | Regulation             | Translation | RNA polyadenylation                                            | GO:0043631 | P | 16  | 4.38E-03 | 3.52E-02 |
| 6 | 2503 | F3 vs. L3 | - | Regulation             | Translation | RNA processing                                                 | GO:0006396 | P | 494 | 0.00E+00 | 0.00E+00 |
| 6 | 2504 | F3 vs. L3 | - | Regulation             | Translation | RNA splicing                                                   | GO:0008380 | P | 174 | 6.60E-11 | 4.63E-09 |
| 6 | 2505 | F3 vs. L3 | - | Regulation             | Translation | RNA splicing, via transesterification reactions                | GO:0000375 | P | 150 | 2.10E-11 | 1.69E-09 |
|   |      |           |   |                        |             | RNA splicing, via transesterification reactions with bulged    |            |   |     |          |          |
| 6 | 2506 | F3 vs. L3 | - | Regulation             | Translation | adenosine as nucleophile                                       | GO:0000377 | P | 150 | 2.10E-11 | 1.71E-09 |
| 6 | 2507 | F3 vs. L3 | - | Regulation             | Translation | rRNA base methylation                                          | GO:0070475 | P | 11  | 8.07E-04 | 8.96E-03 |
| 6 | 2508 | F3 vs. L3 | - | Regulation             | Translation | rRNA metabolic process                                         | GO:0016072 | P | 176 | 1.27E-06 | 3.29E-05 |
| 6 | 2509 | F3 vs. L3 | - | Regulation             | Translation | rRNA methylation                                               | GO:0031167 | P | 15  | 4.20E-04 | 5.23E-03 |
| 6 | 2510 | F3 vs. L3 | - | Regulation             | Translation | rRNA modification                                              | GO:0000154 | P | 24  | 5.74E-05 | 9.41E-04 |
| 6 | 2511 | F3 vs. L3 | - | Regulation             | Translation | rRNA processing                                                | GO:0006364 | P | 168 | 1.24E-06 | 3.23E-05 |
| 6 | 2512 | F3 vs. L3 | - | Regulation             | Translation | small nuclear ribonucleoprotein complex                        | GO:0030532 | C | 54  | 3.23E-10 | 7.30E-09 |
| 6 | 2513 | F3 vs. L3 | - | Regulation             | Translation | small nucleolar ribonucleoprotein complex                      | GO:0005732 | C | 21  | 1.31E-06 | 1.72E-05 |
| 6 | 2514 | F3 vs. L3 | - | Regulation             | Translation | small ribosomal subunit                                        | GO:0015935 | C | 86  | 2.48E-07 | 3.60E-06 |
| 6 | 2515 | F3 vs. L3 | - | Regulation             | Translation | small-subunit processome                                       | GO:0032040 | C | 37  | 4.65E-05 | 4.40E-04 |
| 6 | 2516 | F3 vs. L3 | - | Regulation             | Translation | snoRNA binding                                                 | GO:0030515 | F | 20  | 6.18E-04 | 1.48E-02 |
| 6 | 2517 | F3 vs. L3 | - | Regulation             | Translation | snRNA metabolic process                                        | GO:0016073 | P | 17  | 6.16E-03 | 4.67E-02 |
| 6 | 2518 | F3 vs. L3 | - | Regulation             | Translation | spliceosomal complex                                           | GO:0005681 | C | 100 | 3.38E-09 | 6.20E-08 |
| 6 | 2519 | F3 vs. L3 | - | Regulation             | Translation | spliceosomal snRNP assembly                                    | GO:0000387 | P | 18  | 3.37E-04 | 4.34E-03 |
| 6 | 2520 | F3 vs. L3 | - | Regulation             | Translation | spliceosomal snRNP complex                                     | GO:0097525 | C | 54  | 3.23E-10 | 7.47E-09 |
| 6 | 2521 | F3 vs. L3 | - | Regulation             | Translation | spliceosomal tri-snRNP complex                                 | GO:0097526 | C | 32  | 9.33E-09 | 1.65E-07 |
| 6 | 2522 | F3 vs. L3 | - | Regulation             | Translation | structural constituent of ribosome                             | GO:0003735 | F | 200 | 1.82E-12 | 4.02E-10 |
| 6 | 2523 | F3 vs. L3 | - | Regulation             | Translation | translation                                                    | GO:0006412 | P | 317 | 2.72E-09 | 1.38E-07 |
| 6 | 2524 | F3 vs. L3 | - | Regulation             | Translation | tRNA metabolic process                                         | GO:0006399 | P | 104 | 9.67E-06 | 1.95E-04 |
| 6 | 2525 | F3 vs. L3 | - | Regulation             | Translation | tRNA methylation                                               | GO:0030488 | P | 21  | 5.81E-04 | 6.92E-03 |
| 6 | 2526 | F3 vs. L3 | - | Regulation             | Translation | tRNA methyltransferase activity                                | GO:0008175 | F | 19  | 1.79E-03 | 3.40E-02 |
| 6 | 2527 | F3 vs. L3 | - | Regulation             | Translation | tRNA modification                                              | GO:0006400 | P | 53  | 1.32E-07 | 4.70E-06 |
| 6 | 2528 | F3 vs. L3 | - | Regulation             | Translation | tRNA processing                                                | GO:0008033 | P | 62  | 4.44E-09 | 2.22E-07 |
| 6 | 2529 | F3 vs. L3 | - | Regulation             | Translation | U1 snRNP                                                       | GO:0005685 | C | 21  | 9.18E-06 | 1.04E-04 |
| 6 | 2530 | F3 vs. L3 | - | Regulation             | Translation | U12-type spliceosomal complex                                  | GO:0005689 | C | 17  | 3.39E-04 | 2.90E-03 |
| 6 | 2531 | F3 vs. L3 | - | Regulation             | Translation | U2 snRNP                                                       | GO:0005686 | C | 21  | 5.10E-06 | 6.05E-05 |
| 6 | 2532 | F3 vs. L3 | - | Regulation             | Translation | U2-type prespliceosome                                         | GO:0071004 | C | 17  | 7.39E-04 | 5.25E-03 |
| 6 | 2533 | F3 vs. L3 | - | Regulation             | Translation | U2-type spliceosomal complex                                   | GO:0005684 | C | 38  | 1.42E-04 | 1.26E-03 |
| 6 | 2534 | F3 vs. L3 | - | Regulation             | Translation | U4 snRNP                                                       | GO:0005687 | C | 11  | 4.59E-05 | 4.38E-04 |
| 6 | 2535 | F3 vs. L3 | - | Regulation             | Translation | U4/U6 x U5 tri-snRNP complex                                   | GO:0046540 | C | 24  | 9.48E-07 | 1.32E-05 |
| 6 | 2536 | F3 vs. L3 | - | Regulation             | Translation | U5 snRNP                                                       | GO:0005682 | C | 15  | 2.14E-05 | 2.27E-04 |
| 6 | 2537 | F3 vs. L3 | - | Signaling and response | Signaling   | kinase regulator activity                                      | GO:0019207 | F | 55  | 3.20E-06 | 1.84E-04 |
| 6 | 2538 | F3 vs. L3 | - | Signaling and response | Signaling   | protein kinase complex                                         | GO:1902911 | C | 51  | 1.28E-05 | 1.43E-04 |
| 6 | 2539 | F3 vs. L3 | - | Signaling and response | Signaling   | protein kinase regulator activity                              | GO:0019887 | F | 53  | 7.42E-06 | 4.03E-04 |
|   |      |           |   |                        |             | regulation of cyclin-dependent protein serine/threonine kinase |            |   |     |          |          |
| 6 | 2540 | F3 vs. L3 | - | Signaling and response | Signaling   | activity                                                       | GO:0000079 | P | 32  | 4.07E-03 | 3.36E-02 |
| 6 | 2541 | F3 vs. L3 | - | Signaling and response | Signaling   | regulation of kinase activity                                  | GO:0043549 | P | 52  | 1.18E-04 | 1.79E-03 |
| 6 | 2542 | F3 vs. L3 | - | Signaling and response | Signaling   | regulation of long-day photoperiodism, flowering               | GO:0048586 | P | 17  | 6.35E-03 | 4.80E-02 |
| 6 | 2543 | F3 vs. L3 | - | Signaling and response | Signaling   | regulation of phosphorylation                                  | GO:0042325 | P | 68  | 3.97E-03 | 3.29E-02 |
| 6 | 2544 | F3 vs. L3 | - | Signaling and response | Signaling   | regulation of protein kinase activity                          | GO:0045859 | P | 51  | 1.39E-04 | 2.07E-03 |
| 6 | 2545 | F3 vs. L3 | - | Signaling and response | Signaling   | regulation of protein phosphorylation                          | GO:0001932 | P | 61  | 1.22E-03 | 1.27E-02 |
| 6 | 2546 | F3 vs. L3 | - | Signaling and response | Signaling   | response to ionizing radiation                                 | GO:0010212 | P | 15  | 3.01E-03 | 2.65E-02 |
| 6 | 2547 | F3 vs. L3 | - | Signaling and response | Signaling   | serine/threonine protein kinase complex                        | GO:1902554 | C | 47  | 3.86E-05 | 3.79E-04 |
| 6 | 2548 | F3 vs. L3 | - | Signaling and response | Stress      | cellular response to DNA damage stimulus                       | GO:0006974 | P | 209 | 4.88E-15 | 8.73E-13 |
| 6 | 2549 | F3 vs. L3 | - | Signaling and response | Stress      | damaged DNA binding                                            | GO:0003684 | F | 29  | 9.43E-04 | 2.12E-02 |

|   |      |           |   |                        |               |                                                        |            |   |      |          |          |
|---|------|-----------|---|------------------------|---------------|--------------------------------------------------------|------------|---|------|----------|----------|
| 6 | 2550 | F3 vs. L3 | - | Signaling and response | Stress        | site of DNA damage                                     | GO:0090734 | C | 6    | 6.66E-03 | 3.62E-02 |
| 7 | 2551 | F2 vs. M2 | + | Development            | Cell division | nucleobase-containing small molecule metabolic process | GO:0055086 | P | 237  | 3.93E-04 | 6.47E-03 |
| 7 | 2552 | F2 vs. M2 | + | Development            | Cell division | nucleotide-sugar biosynthetic process                  | GO:0009226 | P | 30   | 3.53E-05 | 8.56E-04 |
| 7 | 2553 | F2 vs. M2 | + | Development            | Cell division | nucleotide-sugar metabolic process                     | GO:0009225 | P | 34   | 5.85E-05 | 1.29E-03 |
| 7 | 2554 | F2 vs. M2 | + | Development            | Cell division | pollen tube development                                | GO:0048868 | P | 96   | 9.07E-07 | 4.00E-05 |
| 7 | 2555 | F2 vs. M2 | + | Development            | Cell division | pollen tube growth                                     | GO:0009860 | P | 74   | 2.33E-06 | 8.83E-05 |
| 7 | 2556 | F2 vs. M2 | + | Development            | Cell division | pollen tube guidance                                   | GO:0010183 | P | 15   | 5.29E-03 | 4.54E-02 |
| 7 | 2557 | F2 vs. M2 | + | Development            | Cell division | pollination                                            | GO:0009856 | P | 142  | 1.49E-04 | 2.75E-03 |
| 7 | 2558 | F2 vs. M2 | + | Development            | Cell division | syncytium formation                                    | GO:0006949 | P | 12   | 5.63E-04 | 8.46E-03 |
| 7 | 2559 | F2 vs. M2 | + | Development            | Development   | actin cytoskeleton                                     | GO:0015629 | C | 33   | 1.80E-04 | 1.58E-03 |
| 7 | 2560 | F2 vs. M2 | + | Development            | Development   | actin cytoskeleton organization                        | GO:0030036 | P | 58   | 1.06E-03 | 1.33E-02 |
| 7 | 2561 | F2 vs. M2 | + | Development            | Development   | actin filament                                         | GO:0005884 | C | 5    | 1.89E-03 | 1.32E-02 |
| 7 | 2562 | F2 vs. M2 | + | Development            | Development   | apoplast                                               | GO:0048046 | C | 169  | 0.00E+00 | 0.00E+00 |
| 7 | 2563 | F2 vs. M2 | + | Development            | Development   | bounding membrane of organelle                         | GO:0098588 | C | 553  | 6.45E-06 | 7.38E-05 |
| 7 | 2564 | F2 vs. M2 | + | Development            | Development   | cell development                                       | GO:0048468 | P | 164  | 2.70E-04 | 4.60E-03 |
| 7 | 2565 | F2 vs. M2 | + | Development            | Development   | cell growth                                            | GO:0016049 | P | 216  | 4.15E-06 | 1.40E-04 |
| 7 | 2566 | F2 vs. M2 | + | Development            | Development   | cell morphogenesis                                     | GO:0000902 | P | 204  | 5.14E-03 | 4.45E-02 |
| 7 | 2567 | F2 vs. M2 | + | Development            | Development   | cell morphogenesis involved in differentiation         | GO:0000904 | P | 118  | 1.32E-03 | 1.62E-02 |
| 7 | 2568 | F2 vs. M2 | + | Development            | Development   | cell periphery                                         | GO:0071944 | C | 2123 | 2.51E-11 | 6.82E-10 |
| 7 | 2569 | F2 vs. M2 | + | Development            | Development   | cell pole                                              | GO:0060187 | C | 9    | 5.74E-03 | 3.32E-02 |
| 7 | 2570 | F2 vs. M2 | + | Development            | Development   | cell projection                                        | GO:0042995 | C | 55   | 4.18E-07 | 6.10E-06 |
| 7 | 2571 | F2 vs. M2 | + | Development            | Development   | cell tip                                               | GO:0051286 | C | 9    | 5.74E-03 | 3.30E-02 |
| 7 | 2572 | F2 vs. M2 | + | Development            | Development   | cell tip growth                                        | GO:0009932 | P | 86   | 1.28E-06 | 5.38E-05 |
| 7 | 2573 | F2 vs. M2 | + | Development            | Development   | cell wall                                              | GO:0005618 | C | 325  | 6.82E-05 | 6.61E-04 |
| 7 | 2574 | F2 vs. M2 | + | Development            | Development   | cell wall biogenesis                                   | GO:0042546 | P | 124  | 3.35E-04 | 5.60E-03 |
| 7 | 2575 | F2 vs. M2 | + | Development            | Development   | cell wall modification                                 | GO:0042545 | P | 98   | 5.12E-03 | 4.45E-02 |
| 7 | 2576 | F2 vs. M2 | + | Development            | Development   | cell wall organization                                 | GO:0071555 | P | 149  | 9.13E-06 | 2.74E-04 |
| 7 | 2577 | F2 vs. M2 | + | Development            | Development   | cell wall organization or biogenesis                   | GO:0071554 | P | 270  | 3.11E-08 | 2.21E-06 |
| 7 | 2578 | F2 vs. M2 | + | Development            | Development   | cell wall pectin metabolic process                     | GO:0052546 | P | 17   | 3.13E-04 | 5.28E-03 |
| 7 | 2579 | F2 vs. M2 | + | Development            | Development   | cytoplasm                                              | GO:0005737 | C | 6876 | 5.41E-04 | 4.32E-03 |
| 7 | 2580 | F2 vs. M2 | + | Development            | Development   | cytosol                                                | GO:0005829 | C | 1972 | 1.30E-06 | 1.65E-05 |
| 7 | 2581 | F2 vs. M2 | + | Development            | Development   | developmental cell growth                              | GO:0048588 | P | 101  | 7.33E-08 | 4.40E-06 |
| 7 | 2582 | F2 vs. M2 | + | Development            | Development   | developmental growth                                   | GO:0048589 | P | 220  | 1.25E-05 | 3.54E-04 |
| 7 | 2583 | F2 vs. M2 | + | Development            | Development   | developmental growth involved in morphogenesis         | GO:0060560 | P | 189  | 5.98E-06 | 1.94E-04 |
| 7 | 2584 | F2 vs. M2 | + | Development            | Development   | endomembrane system                                    | GO:0012505 | C | 1212 | 5.41E-06 | 6.43E-05 |
| 7 | 2585 | F2 vs. M2 | + | Development            | Development   | envelope                                               | GO:0031975 | C | 639  | 9.63E-13 | 2.86E-11 |
| 7 | 2586 | F2 vs. M2 | + | Development            | Development   | external encapsulating structure                       | GO:0030312 | C | 327  | 3.85E-05 | 3.93E-04 |
| 7 | 2587 | F2 vs. M2 | + | Development            | Development   | external encapsulating structure organization          | GO:0045229 | P | 173  | 3.49E-06 | 1.23E-04 |
| 7 | 2588 | F2 vs. M2 | + | Development            | Development   | extracellular region                                   | GO:0005576 | C | 1209 | 2.55E-15 | 8.98E-14 |
| 7 | 2589 | F2 vs. M2 | + | Development            | Development   | extracellular space                                    | GO:0005615 | C | 48   | 7.46E-04 | 5.81E-03 |
| 7 | 2590 | F2 vs. M2 | + | Development            | Development   | Golgi apparatus subcompartment                         | GO:0098791 | C | 252  | 3.41E-09 | 7.03E-08 |
| 7 | 2591 | F2 vs. M2 | + | Development            | Development   | Golgi cisterna                                         | GO:0031985 | C | 111  | 1.85E-03 | 1.30E-02 |
| 7 | 2592 | F2 vs. M2 | + | Development            | Development   | Golgi stack                                            | GO:0005795 | C | 117  | 1.92E-03 | 1.33E-02 |
| 7 | 2593 | F2 vs. M2 | + | Development            | Development   | Golgi trans cisterna                                   | GO:0000138 | C | 55   | 4.37E-04 | 3.61E-03 |
| 7 | 2594 | F2 vs. M2 | + | Development            | Development   | growing cell tip                                       | GO:0035838 | C | 6    | 5.51E-03 | 3.25E-02 |
| 7 | 2595 | F2 vs. M2 | + | Development            | Development   | growth                                                 | GO:0040007 | P | 251  | 8.99E-06 | 2.71E-04 |
| 7 | 2596 | F2 vs. M2 | + | Development            | Development   | intracellular vesicle                                  | GO:0097708 | C | 397  | 1.70E-07 | 2.70E-06 |
| 7 | 2597 | F2 vs. M2 | + | Development            | Development   | membrane                                               | GO:0016020 | C | 2909 | 1.11E-16 | 4.39E-15 |
| 7 | 2598 | F2 vs. M2 | + | Development            | Development   | microbody                                              | GO:0042579 | C | 162  | 1.12E-06 | 1.48E-05 |
| 7 | 2599 | F2 vs. M2 | + | Development            | Development   | multi-multicellular organism process                   | GO:0044706 | P | 142  | 1.49E-04 | 2.76E-03 |
| 7 | 2600 | F2 vs. M2 | + | Development            | Development   | organelle envelope                                     | GO:0031967 | C | 639  | 9.63E-13 | 2.77E-11 |
| 7 | 2601 | F2 vs. M2 | + | Development            | Development   | organelle membrane                                     | GO:0031090 | C | 843  | 1.64E-04 | 1.48E-03 |
| 7 | 2602 | F2 vs. M2 | + | Development            | Development   | organelle subcompartment                               | GO:0031984 | C | 693  | 0.00E+00 | 0.00E+00 |
| 7 | 2603 | F2 vs. M2 | + | Development            | Development   | plant-type cell wall biogenesis                        | GO:0009832 | P | 78   | 2.69E-04 | 4.61E-03 |
| 7 | 2604 | F2 vs. M2 | + | Development            | Development   | plant-type cell wall modification                      | GO:0009827 | P | 37   | 3.00E-03 | 3.02E-02 |
| 7 | 2605 | F2 vs. M2 | + | Development            | Development   | plant-type cell wall organization                      | GO:0009664 | P | 80   | 1.10E-05 | 3.15E-04 |
| 7 | 2606 | F2 vs. M2 | + | Development            | Development   | plant-type cell wall organization or biogenesis        | GO:0071669 | P | 137  | 2.59E-07 | 1.30E-05 |
| 7 | 2607 | F2 vs. M2 | + | Development            | Development   | plant-type primary cell wall biogenesis                | GO:0009833 | P | 18   | 8.10E-04 | 1.13E-02 |
| 7 | 2608 | F2 vs. M2 | + | Development            | Development   | plant-type vacuole                                     | GO:0000325 | C | 96   | 9.70E-08 | 1.64E-06 |
| 7 | 2609 | F2 vs. M2 | + | Development            | Development   | plant-type vacuole membrane                            | GO:0009705 | C | 66   | 2.75E-05 | 2.87E-04 |
| 7 | 2610 | F2 vs. M2 | + | Development            | Development   | plasma membrane                                        | GO:0005886 | C | 1864 | 2.93E-09 | 6.32E-08 |
| 7 | 2611 | F2 vs. M2 | + | Development            | Development   | plasma membrane bounded cell projection                | GO:0120025 | C | 49   | 4.19E-09 | 8.47E-08 |
| 7 | 2612 | F2 vs. M2 | + | Development            | Development   | pollen tube                                            | GO:0090406 | C | 41   | 3.14E-08 | 6.09E-07 |
| 7 | 2613 | F2 vs. M2 | + | Development            | Development   | pollen tube tip                                        | GO:0090404 | C | 6    | 5.51E-03 | 3.27E-02 |

|   |      |           |   |             |               |                                                                                                                               |            |   |     |          |          |
|---|------|-----------|---|-------------|---------------|-------------------------------------------------------------------------------------------------------------------------------|------------|---|-----|----------|----------|
| 7 | 2614 | F2 vs. M2 | + | Development | Development   | root epidermal cell differentiation                                                                                           | GO:0010053 | P | 68  | 4.35E-03 | 3.95E-02 |
| 7 | 2615 | F2 vs. M2 | + | Development | Development   | root hair elongation                                                                                                          | GO:0048767 | P | 32  | 3.16E-03 | 3.14E-02 |
| 7 | 2616 | F2 vs. M2 | + | Development | Development   | stromule                                                                                                                      | GO:0010319 | C | 32  | 1.46E-10 | 3.76E-09 |
| 7 | 2617 | F2 vs. M2 | + | Development | Development   | unidimensional cell growth                                                                                                    | GO:0009826 | P | 165 | 1.18E-04 | 2.32E-03 |
| 7 | 2618 | F2 vs. M2 | + | Development | Development   | vacuolar membrane                                                                                                             | GO:0005774 | C | 355 | 4.18E-07 | 6.02E-06 |
| 7 | 2619 | F2 vs. M2 | + | Development | Development   | vacuole                                                                                                                       | GO:0005773 | C | 657 | 4.54E-13 | 1.44E-11 |
| 7 | 2620 | F2 vs. M2 | + | Metabolism  | Bioenergetics | (1->3)-beta-D-glucan binding (NAD+) activity                                                                                  | GO:0004029 | F | 10  | 1.26E-03 | 3.13E-02 |
| 7 | 2621 | F2 vs. M2 | + | Metabolism  | Bioenergetics | aerobic respiration                                                                                                           | GO:0009060 | P | 54  | 3.97E-05 | 9.55E-04 |
| 7 | 2622 | F2 vs. M2 | + | Metabolism  | Bioenergetics | aldehyde dehydrogenase [NAD(P)+] activity                                                                                     | GO:0004030 | F | 10  | 1.26E-03 | 3.16E-02 |
| 7 | 2623 | F2 vs. M2 | + | Metabolism  | Bioenergetics | ATPase activity, coupled to transmembrane movement of ions, rotational mechanism                                              | GO:0044769 | F | 19  | 1.65E-03 | 3.74E-02 |
| 7 | 2624 | F2 vs. M2 | + | Metabolism  | Bioenergetics | carbohydrate biosynthetic process                                                                                             | GO:0016051 | P | 177 | 1.25E-12 | 2.79E-10 |
| 7 | 2625 | F2 vs. M2 | + | Metabolism  | Bioenergetics | carbohydrate catabolic process                                                                                                | GO:0016052 | P | 142 | 1.03E-06 | 4.43E-05 |
| 7 | 2626 | F2 vs. M2 | + | Metabolism  | Bioenergetics | carbohydrate derivative metabolic process                                                                                     | GO:1901135 | P | 425 | 8.60E-05 | 1.80E-03 |
| 7 | 2627 | F2 vs. M2 | + | Metabolism  | Bioenergetics | carbohydrate metabolic process                                                                                                | GO:0005975 | P | 514 | 0.00E+00 | 0.00E+00 |
| 7 | 2628 | F2 vs. M2 | + | Metabolism  | Bioenergetics | cellular carbohydrate biosynthetic process                                                                                    | GO:0034637 | P | 123 | 2.60E-07 | 1.30E-05 |
| 7 | 2629 | F2 vs. M2 | + | Metabolism  | Bioenergetics | cellular carbohydrate catabolic process                                                                                       | GO:0044275 | P | 33  | 3.15E-03 | 3.14E-02 |
| 7 | 2630 | F2 vs. M2 | + | Metabolism  | Bioenergetics | cellular carbohydrate metabolic process                                                                                       | GO:0044262 | P | 226 | 1.35E-10 | 2.06E-08 |
| 7 | 2631 | F2 vs. M2 | + | Metabolism  | Bioenergetics | cellular polysaccharide biosynthetic process                                                                                  | GO:0033692 | P | 103 | 2.56E-06 | 9.21E-05 |
| 7 | 2632 | F2 vs. M2 | + | Metabolism  | Bioenergetics | cellular polysaccharide metabolic process                                                                                     | GO:0044264 | P | 160 | 3.87E-07 | 1.88E-05 |
| 7 | 2633 | F2 vs. M2 | + | Metabolism  | Bioenergetics | cellular respiration                                                                                                          | GO:0045333 | P | 80  | 1.24E-04 | 2.41E-03 |
| 7 | 2634 | F2 vs. M2 | + | Metabolism  | Bioenergetics | CoA-ligase activity                                                                                                           | GO:0016405 | F | 16  | 1.82E-04 | 7.58E-03 |
| 7 | 2635 | F2 vs. M2 | + | Metabolism  | Bioenergetics | electron transport chain                                                                                                      | GO:0022900 | P | 77  | 1.36E-04 | 2.60E-03 |
| 7 | 2636 | F2 vs. M2 | + | Metabolism  | Bioenergetics | energy derivation by oxidation of organic compounds                                                                           | GO:0015980 | P | 89  | 1.70E-04 | 3.12E-03 |
| 7 | 2637 | F2 vs. M2 | + | Metabolism  | Bioenergetics | fatty acid metabolic process                                                                                                  | GO:0006631 | P | 130 | 7.79E-05 | 1.66E-03 |
| 7 | 2638 | F2 vs. M2 | + | Metabolism  | Bioenergetics | generation of precursor metabolites and energy                                                                                | GO:0006091 | P | 235 | 2.22E-16 | 9.88E-14 |
| 7 | 2639 | F2 vs. M2 | + | Metabolism  | Bioenergetics | gluconeogenesis                                                                                                               | GO:0006094 | P | 19  | 6.50E-06 | 2.06E-04 |
| 7 | 2640 | F2 vs. M2 | + | Metabolism  | Bioenergetics | glucose 6-phosphate metabolic process                                                                                         | GO:0051156 | P | 28  | 2.62E-04 | 4.53E-03 |
| 7 | 2641 | F2 vs. M2 | + | Metabolism  | Bioenergetics | glucose metabolic process                                                                                                     | GO:0006006 | P | 31  | 9.59E-05 | 1.90E-03 |
| 7 | 2642 | F2 vs. M2 | + | Metabolism  | Bioenergetics | glyceraldehyde-3-phosphate dehydrogenase (NAD+) (non-phosphorylating) activity                                                | GO:0043878 | F | 7   | 2.35E-03 | 4.88E-02 |
| 7 | 2643 | F2 vs. M2 | + | Metabolism  | Bioenergetics | hexose biosynthetic process                                                                                                   | GO:0019319 | P | 20  | 2.55E-06 | 9.33E-05 |
| 7 | 2644 | F2 vs. M2 | + | Metabolism  | Bioenergetics | hexose metabolic process                                                                                                      | GO:0019318 | P | 57  | 1.81E-04 | 3.28E-03 |
| 7 | 2645 | F2 vs. M2 | + | Metabolism  | Bioenergetics | isocitrate metabolic process                                                                                                  | GO:0006102 | P | 10  | 1.04E-03 | 1.32E-02 |
| 7 | 2646 | F2 vs. M2 | + | Metabolism  | Bioenergetics | malate metabolic process                                                                                                      | GO:0006108 | P | 9   | 4.77E-03 | 4.27E-02 |
| 7 | 2647 | F2 vs. M2 | + | Metabolism  | Bioenergetics | monosaccharide biosynthetic process                                                                                           | GO:0046364 | P | 33  | 3.16E-06 | 1.13E-04 |
| 7 | 2648 | F2 vs. M2 | + | Metabolism  | Bioenergetics | NAD binding                                                                                                                   | GO:0051287 | F | 52  | 2.65E-04 | 9.66E-03 |
| 7 | 2649 | F2 vs. M2 | + | Metabolism  | Bioenergetics | NAD(P)H dehydrogenase complex (plastoquinone)                                                                                 | GO:0010598 | C | 8   | 1.17E-03 | 8.61E-03 |
| 7 | 2650 | F2 vs. M2 | + | Metabolism  | Bioenergetics | NAD(P)H dehydrogenase complex assembly                                                                                        | GO:0010275 | P | 6   | 3.80E-03 | 3.55E-02 |
| 7 | 2651 | F2 vs. M2 | + | Metabolism  | Bioenergetics | NADP metabolic process                                                                                                        | GO:0006739 | P | 32  | 4.03E-06 | 1.40E-04 |
| 7 | 2652 | F2 vs. M2 | + | Metabolism  | Bioenergetics | NADPH regeneration                                                                                                            | GO:0006740 | P | 24  | 5.39E-05 | 1.21E-03 |
| 7 | 2653 | F2 vs. M2 | + | Metabolism  | Bioenergetics | oxidoreductase activity                                                                                                       | GO:0016491 | F | 739 | 0.00E+00 | 0.00E+00 |
| 7 | 2654 | F2 vs. M2 | + | Metabolism  | Bioenergetics | oxidoreductase activity, acting on a sulfur group of donors                                                                   | GO:0016667 | F | 56  | 1.30E-04 | 5.48E-03 |
| 7 | 2655 | F2 vs. M2 | + | Metabolism  | Bioenergetics | oxidoreductase activity, acting on CH-OH group of donors                                                                      | GO:0016614 | F | 114 | 2.34E-04 | 9.02E-03 |
| 7 | 2656 | F2 vs. M2 | + | Metabolism  | Bioenergetics | oxidoreductase activity, acting on NAD(P)H                                                                                    | GO:0016651 | F | 66  | 1.14E-05 | 8.34E-04 |
| 7 | 2657 | F2 vs. M2 | + | Metabolism  | Bioenergetics | oxidoreductase activity, acting on single donors with incorporation of molecular oxygen                                       | GO:0016701 | F | 25  | 1.06E-05 | 8.18E-04 |
| 7 | 2658 | F2 vs. M2 | + | Metabolism  | Bioenergetics | oxidoreductase activity, acting on single donors with incorporation of molecular oxygen, incorporation of two atoms of oxygen | GO:0016702 | F | 17  | 1.16E-03 | 2.99E-02 |
| 7 | 2659 | F2 vs. M2 | + | Metabolism  | Bioenergetics | oxidoreductase activity, acting on the aldehyde or oxo group of donors                                                        | GO:0016903 | F | 38  | 1.65E-06 | 1.65E-04 |
| 7 | 2660 | F2 vs. M2 | + | Metabolism  | Bioenergetics | oxidoreductase activity, acting on the aldehyde or oxo group of donors, NAD or NADP as acceptor                               | GO:0016620 | F | 28  | 1.46E-06 | 1.52E-04 |
| 7 | 2661 | F2 vs. M2 | + | Metabolism  | Bioenergetics | oxidoreductase activity, acting on the CH-OH group of donors, NAD or NADP as acceptor                                         | GO:0016616 | F | 102 | 1.02E-04 | 4.68E-03 |
| 7 | 2662 | F2 vs. M2 | + | Metabolism  | Bioenergetics | oxidoreductase complex                                                                                                        | GO:1990204 | C | 94  | 2.55E-05 | 2.69E-04 |
| 7 | 2663 | F2 vs. M2 | + | Metabolism  | Bioenergetics | pentose-phosphate shunt                                                                                                       | GO:0006098 | P | 23  | 5.20E-05 | 1.18E-03 |
| 7 | 2664 | F2 vs. M2 | + | Metabolism  | Bioenergetics | photorespiration                                                                                                              | GO:0009853 | P | 25  | 5.45E-04 | 8.25E-03 |
| 7 | 2665 | F2 vs. M2 | + | Metabolism  | Bioenergetics | polysaccharide biosynthetic process                                                                                           | GO:0000271 | P | 119 | 1.51E-06 | 6.04E-05 |
| 7 | 2666 | F2 vs. M2 | + | Metabolism  | Bioenergetics | polysaccharide metabolic process                                                                                              | GO:0005976 | P | 240 | 1.77E-10 | 2.62E-08 |
| 7 | 2667 | F2 vs. M2 | + | Metabolism  | Bioenergetics | proton transmembrane transport                                                                                                | GO:1902600 | P | 62  | 3.92E-04 | 6.48E-03 |
| 7 | 2668 | F2 vs. M2 | + | Metabolism  | Bioenergetics | proton-transporting ATPase activity, rotational mechanism                                                                     | GO:0046961 | F | 19  | 1.65E-03 | 3.77E-02 |
| 7 | 2669 | F2 vs. M2 | + | Metabolism  | Bioenergetics | proton-transporting two-sector ATPase complex                                                                                 | GO:0016469 | C | 43  | 3.39E-03 | 2.18E-02 |

|   |      |           |   |            |               |                                                                               |            |   |      |          |          |
|---|------|-----------|---|------------|---------------|-------------------------------------------------------------------------------|------------|---|------|----------|----------|
| 7 | 2670 | F2 vs. M2 | + | Metabolism | Bioenergetics | proton-transporting two-sector ATPase complex, catalytic domain               | GO:0033178 | C | 16   | 6.14E-03 | 3.45E-02 |
| 7 | 2671 | F2 vs. M2 | + | Metabolism | Bioenergetics | proton-transporting V-type ATPase complex                                     | GO:0033176 | C | 17   | 2.58E-04 | 2.21E-03 |
|   |      |           |   |            |               | pyrophosphate hydrolysis-driven proton transmembrane transporter activity     | GO:0009678 | F | 33   | 7.28E-05 | 3.78E-03 |
| 7 | 2672 | F2 vs. M2 | + | Metabolism | Bioenergetics | pyruvate metabolic process                                                    | GO:0006090 | P | 53   | 3.29E-03 | 3.23E-02 |
| 7 | 2673 | F2 vs. M2 | + | Metabolism | Bioenergetics | reductive pentose-phosphate cycle                                             | GO:0019253 | P | 14   | 7.15E-07 | 3.26E-05 |
| 7 | 2674 | F2 vs. M2 | + | Metabolism | Bioenergetics | sucrose metabolic process                                                     | GO:0005985 | P | 29   | 1.99E-03 | 2.23E-02 |
| 7 | 2675 | F2 vs. M2 | + | Metabolism | Bioenergetics | tricarboxylic acid cycle                                                      | GO:0006099 | P | 29   | 2.02E-05 | 5.36E-04 |
| 7 | 2676 | F2 vs. M2 | + | Metabolism | Bioenergetics | tricarboxylic acid metabolic process                                          | GO:0072350 | P | 15   | 2.02E-04 | 3.61E-03 |
| 7 | 2677 | F2 vs. M2 | + | Metabolism | Bioenergetics | unsaturated fatty acid metabolic process                                      | GO:0033559 | P | 18   | 4.99E-03 | 4.39E-02 |
| 7 | 2678 | F2 vs. M2 | + | Metabolism | Bioenergetics | vacuolar proton-transporting V-type ATPase complex                            | GO:0016471 | C | 7    | 4.26E-03 | 2.64E-02 |
| 7 | 2679 | F2 vs. M2 | + | Metabolism | Catabolism    | alcohol catabolic process                                                     | GO:0046164 | P | 26   | 2.62E-04 | 4.54E-03 |
| 7 | 2680 | F2 vs. M2 | + | Metabolism | Catabolism    | alpha-amino acid catabolic process                                            | GO:1901606 | P | 56   | 1.58E-07 | 8.43E-06 |
| 7 | 2681 | F2 vs. M2 | + | Metabolism | Catabolism    | aromatic amino acid family catabolic process                                  | GO:0009074 | P | 13   | 1.48E-03 | 1.78E-02 |
| 7 | 2682 | F2 vs. M2 | + | Metabolism | Catabolism    | carboxylic acid catabolic process                                             | GO:0046395 | P | 98   | 2.90E-08 | 2.15E-06 |
| 7 | 2683 | F2 vs. M2 | + | Metabolism | Catabolism    | catabolic process                                                             | GO:0009056 | P | 781  | 8.23E-06 | 2.52E-04 |
| 7 | 2684 | F2 vs. M2 | + | Metabolism | Catabolism    | cell wall macromolecule catabolic process                                     | GO:0016998 | P | 17   | 3.48E-03 | 3.35E-02 |
| 7 | 2685 | F2 vs. M2 | + | Metabolism | Catabolism    | cellular amino acid catabolic process                                         | GO:0009063 | P | 61   | 6.56E-06 | 2.07E-04 |
| 7 | 2686 | F2 vs. M2 | + | Metabolism | Catabolism    | cellular catabolic process                                                    | GO:0044248 | P | 636  | 4.18E-03 | 3.83E-02 |
| 7 | 2687 | F2 vs. M2 | + | Metabolism | Catabolism    | cellular lipid catabolic process                                              | GO:0044242 | P | 52   | 2.74E-03 | 2.81E-02 |
| 7 | 2688 | F2 vs. M2 | + | Metabolism | Catabolism    | cellular metabolic compound salvage                                           | GO:0043094 | P | 47   | 7.68E-04 | 1.08E-02 |
| 7 | 2689 | F2 vs. M2 | + | Metabolism | Catabolism    | erythrose 4-phosphate/phosphoenolpyruvate family amino acid catabolic process | GO:1902222 | P | 6    | 6.81E-04 | 9.90E-03 |
| 7 | 2690 | F2 vs. M2 | + | Metabolism | Catabolism    | glycine catabolic process                                                     | GO:0006546 | P | 6    | 1.01E-03 | 1.30E-02 |
| 7 | 2691 | F2 vs. M2 | + | Metabolism | Catabolism    | L-phenylalanine catabolic process                                             | GO:0006559 | P | 6    | 6.81E-04 | 9.93E-03 |
| 7 | 2692 | F2 vs. M2 | + | Metabolism | Catabolism    | monocarboxylic acid catabolic process                                         | GO:0072329 | P | 36   | 8.47E-04 | 1.15E-02 |
| 7 | 2693 | F2 vs. M2 | + | Metabolism | Catabolism    | organic acid catabolic process                                                | GO:0016054 | P | 98   | 2.90E-08 | 2.18E-06 |
| 7 | 2694 | F2 vs. M2 | + | Metabolism | Catabolism    | organic hydroxy compound catabolic process                                    | GO:1901616 | P | 31   | 7.96E-06 | 2.47E-04 |
| 7 | 2695 | F2 vs. M2 | + | Metabolism | Catabolism    | organic substance catabolic process                                           | GO:1901575 | P | 719  | 1.46E-04 | 2.74E-03 |
| 7 | 2696 | F2 vs. M2 | + | Metabolism | Catabolism    | organophosphate catabolic process                                             | GO:0046434 | P | 33   | 5.57E-03 | 4.73E-02 |
| 7 | 2697 | F2 vs. M2 | + | Metabolism | Catabolism    | pectin catabolic process                                                      | GO:0045490 | P | 56   | 7.14E-04 | 1.02E-02 |
| 7 | 2698 | F2 vs. M2 | + | Metabolism | Catabolism    | peroxidase activity                                                           | GO:0004601 | F | 56   | 6.39E-04 | 1.94E-02 |
| 7 | 2699 | F2 vs. M2 | + | Metabolism | Catabolism    | peroxisome                                                                    | GO:0005777 | C | 162  | 1.12E-06 | 1.46E-05 |
| 7 | 2700 | F2 vs. M2 | + | Metabolism | Catabolism    | phenol-containing compound catabolic process                                  | GO:0019336 | P | 5    | 5.06E-03 | 4.41E-02 |
| 7 | 2701 | F2 vs. M2 | + | Metabolism | Catabolism    | polyol catabolic process                                                      | GO:0046174 | P | 21   | 1.27E-03 | 1.57E-02 |
| 7 | 2702 | F2 vs. M2 | + | Metabolism | Catabolism    | polysaccharide catabolic process                                              | GO:0000272 | P | 81   | 1.24E-04 | 2.41E-03 |
| 7 | 2703 | F2 vs. M2 | + | Metabolism | Catabolism    | serine family amino acid catabolic process                                    | GO:0009071 | P | 10   | 2.81E-04 | 4.78E-03 |
| 7 | 2704 | F2 vs. M2 | + | Metabolism | Catabolism    | small molecule catabolic process                                              | GO:0044282 | P | 151  | 7.22E-09 | 6.76E-07 |
| 7 | 2705 | F2 vs. M2 | + | Metabolism | Metabolism    | acid-ammonia (or amide) ligase activity                                       | GO:0016880 | F | 8    | 2.01E-03 | 4.37E-02 |
| 7 | 2706 | F2 vs. M2 | + | Metabolism | Metabolism    | acid-thiol ligase activity                                                    | GO:0016878 | F | 19   | 4.51E-04 | 1.56E-02 |
| 7 | 2707 | F2 vs. M2 | + | Metabolism | Metabolism    | actin binding                                                                 | GO:0003779 | F | 62   | 8.42E-05 | 4.14E-03 |
| 7 | 2708 | F2 vs. M2 | + | Metabolism | Metabolism    | actin filament binding                                                        | GO:0051015 | F | 41   | 5.68E-06 | 4.80E-04 |
| 7 | 2709 | F2 vs. M2 | + | Metabolism | Metabolism    | actin filament bundle assembly                                                | GO:0051017 | P | 12   | 4.20E-03 | 3.82E-02 |
| 7 | 2710 | F2 vs. M2 | + | Metabolism | Metabolism    | actin filament bundle organization                                            | GO:0061572 | P | 12   | 4.20E-03 | 3.83E-02 |
| 7 | 2711 | F2 vs. M2 | + | Metabolism | Metabolism    | actin filament depolymerization                                               | GO:0030042 | P | 8    | 5.82E-03 | 4.89E-02 |
| 7 | 2712 | F2 vs. M2 | + | Metabolism | Metabolism    | actin filament organization                                                   | GO:0007015 | P | 50   | 3.99E-03 | 3.68E-02 |
| 7 | 2713 | F2 vs. M2 | + | Metabolism | Metabolism    | actin filament-based process                                                  | GO:0030029 | P | 62   | 2.07E-03 | 2.29E-02 |
| 7 | 2714 | F2 vs. M2 | + | Metabolism | Metabolism    | alcohol metabolic process                                                     | GO:0006066 | P | 78   | 4.47E-05 | 1.05E-03 |
| 7 | 2715 | F2 vs. M2 | + | Metabolism | Metabolism    | alpha-amino acid biosynthetic process                                         | GO:1901607 | P | 114  | 4.23E-04 | 6.86E-03 |
| 7 | 2716 | F2 vs. M2 | + | Metabolism | Metabolism    | alpha-amino acid metabolic process                                            | GO:1901605 | P | 175  | 3.03E-10 | 4.26E-08 |
| 7 | 2717 | F2 vs. M2 | + | Metabolism | Metabolism    | aminoglycan biosynthetic process                                              | GO:0006023 | P | 4    | 3.68E-03 | 3.46E-02 |
| 7 | 2718 | F2 vs. M2 | + | Metabolism | Metabolism    | ammonia assimilation cycle                                                    | GO:0019676 | P | 6    | 1.41E-03 | 1.71E-02 |
| 7 | 2719 | F2 vs. M2 | + | Metabolism | Metabolism    | anion binding                                                                 | GO:0043168 | F | 677  | 5.84E-05 | 3.22E-03 |
| 7 | 2720 | F2 vs. M2 | + | Metabolism | Metabolism    | aromatic amino acid family metabolic process                                  | GO:0009072 | P | 47   | 3.57E-03 | 3.42E-02 |
| 7 | 2721 | F2 vs. M2 | + | Metabolism | Metabolism    | benzene-containing compound metabolic process                                 | GO:0042537 | P | 25   | 2.36E-03 | 2.52E-02 |
| 7 | 2722 | F2 vs. M2 | + | Metabolism | Metabolism    | beta-glucan biosynthetic process                                              | GO:0051274 | P | 39   | 2.28E-04 | 4.03E-03 |
| 7 | 2723 | F2 vs. M2 | + | Metabolism | Metabolism    | beta-glucan metabolic process                                                 | GO:0051273 | P | 42   | 8.97E-04 | 1.21E-02 |
| 7 | 2724 | F2 vs. M2 | + | Metabolism | Metabolism    | biosynthetic process                                                          | GO:0009058 | P | 1591 | 1.15E-03 | 1.43E-02 |
| 7 | 2725 | F2 vs. M2 | + | Metabolism | Metabolism    | carbon utilization                                                            | GO:0015976 | P | 8    | 5.09E-04 | 7.76E-03 |
| 7 | 2726 | F2 vs. M2 | + | Metabolism | Metabolism    | carbon-carbon lyase activity                                                  | GO:0016830 | F | 65   | 8.46E-05 | 4.08E-03 |
| 7 | 2727 | F2 vs. M2 | + | Metabolism | Metabolism    | carbon-oxygen lyase activity                                                  | GO:0016835 | F | 90   | 1.79E-03 | 4.00E-02 |
| 7 | 2728 | F2 vs. M2 | + | Metabolism | Metabolism    | carboxylic acid biosynthetic process                                          | GO:0046394 | P | 278  | 6.36E-08 | 3.90E-06 |
| 7 | 2729 | F2 vs. M2 | + | Metabolism | Metabolism    | carboxylic acid metabolic process                                             | GO:0019752 | P | 526  | 0.00E+00 | 0.00E+00 |
| 7 | 2730 | F2 vs. M2 | + | Metabolism | Metabolism    |                                                                               |            |   |      |          |          |



|                                                                               |      |           |   |            |            |                                                       |            |   |      |          |          |
|-------------------------------------------------------------------------------|------|-----------|---|------------|------------|-------------------------------------------------------|------------|---|------|----------|----------|
| 7                                                                             | 2731 | F2 vs. M2 | + | Metabolism | Metabolism | carboxy-lyase activity                                | GO:0016831 | F | 35   | 1.68E-03 | 3.78E-02 |
| 7                                                                             | 2732 | F2 vs. M2 | + | Metabolism | Metabolism | catalytic activity                                    | GO:0003824 | F | 4128 | 6.32E-14 | 2.84E-11 |
| 7                                                                             | 2733 | F2 vs. M2 | + | Metabolism | Metabolism | cation binding                                        | GO:0043169 | F | 826  | 2.61E-07 | 3.36E-05 |
| 7                                                                             | 2734 | F2 vs. M2 | + | Metabolism | Metabolism | cell wall macromolecule biosynthetic process          | GO:0044038 | P | 43   | 1.70E-03 | 1.98E-02 |
| 7                                                                             | 2735 | F2 vs. M2 | + | Metabolism | Metabolism | cell wall macromolecule metabolic process             | GO:0044036 | P | 93   | 1.28E-03 | 1.58E-02 |
| 7                                                                             | 2736 | F2 vs. M2 | + | Metabolism | Metabolism | cell wall polysaccharide biosynthetic process         | GO:0070592 | P | 40   | 4.79E-03 | 4.28E-02 |
| 7                                                                             | 2737 | F2 vs. M2 | + | Metabolism | Metabolism | cell wall polysaccharide metabolic process            | GO:0010383 | P | 76   | 3.33E-03 | 3.26E-02 |
| 7                                                                             | 2738 | F2 vs. M2 | + | Metabolism | Metabolism | cellular amino acid biosynthetic process              | GO:0008652 | P | 126  | 5.72E-05 | 1.28E-03 |
| 7                                                                             | 2739 | F2 vs. M2 | + | Metabolism | Metabolism | cellular amino acid metabolic process                 | GO:0006520 | P | 230  | 8.87E-09 | 8.02E-07 |
| 7                                                                             | 2740 | F2 vs. M2 | + | Metabolism | Metabolism | cellular component macromolecule biosynthetic process | GO:0070589 | P | 43   | 1.70E-03 | 1.98E-02 |
| 7                                                                             | 2741 | F2 vs. M2 | + | Metabolism | Metabolism | cellular glucan metabolic process                     | GO:0006073 | P | 122  | 1.52E-04 | 2.79E-03 |
| 7                                                                             | 2742 | F2 vs. M2 | + | Metabolism | Metabolism | cellular lipid metabolic process                      | GO:0044255 | P | 368  | 2.19E-07 | 1.11E-05 |
| 7                                                                             | 2743 | F2 vs. M2 | + | Metabolism | Metabolism | cellulose biosynthetic process                        | GO:0030244 | P | 30   | 2.05E-04 | 3.64E-03 |
| 7                                                                             | 2744 | F2 vs. M2 | + | Metabolism | Metabolism | cellulose metabolic process                           | GO:0030243 | P | 33   | 1.04E-03 | 1.32E-02 |
| 7                                                                             | 2745 | F2 vs. M2 | + | Metabolism | Metabolism | cellulose synthase (UDP-forming) activity             | GO:0016760 | F | 18   | 6.69E-04 | 1.98E-02 |
| 7                                                                             | 2746 | F2 vs. M2 | + | Metabolism | Metabolism | cellulose synthase activity                           | GO:0016759 | F | 23   | 5.55E-04 | 1.81E-02 |
| 7                                                                             | 2747 | F2 vs. M2 | + | Metabolism | Metabolism | copper ion binding                                    | GO:0005507 | F | 116  | 9.47E-10 | 2.33E-07 |
| 7                                                                             | 2748 | F2 vs. M2 | + | Metabolism | Metabolism | dicarboxylic acid metabolic process                   | GO:0043648 | P | 53   | 1.44E-05 | 3.93E-04 |
| 7                                                                             | 2749 | F2 vs. M2 | + | Metabolism | Metabolism | dioxygenase activity                                  | GO:0051213 | F | 58   | 2.03E-03 | 4.39E-02 |
| 7                                                                             | 2750 | F2 vs. M2 | + | Metabolism | Metabolism | enzyme inhibitor activity                             | GO:0004857 | F | 86   | 8.85E-05 | 4.20E-03 |
| erythrose 4-phosphate/phosphoenolpyruvate family amino acid metabolic process |      |           |   |            |            |                                                       | GO:1902221 | P | 15   | 3.69E-03 | 3.46E-02 |
| 7                                                                             | 2751 | F2 vs. M2 | + | Metabolism | Metabolism | establishment of localization                         | GO:0051234 | P | 1189 | 3.21E-08 | 2.26E-06 |
| 7                                                                             | 2752 | F2 vs. M2 | + | Metabolism | Metabolism | galacturonan metabolic process                        | GO:0010393 | P | 89   | 1.00E-06 | 4.39E-05 |
| 7                                                                             | 2753 | F2 vs. M2 | + | Metabolism | Metabolism | glucan biosynthetic process                           | GO:0009250 | P | 74   | 2.55E-04 | 4.46E-03 |
| 7                                                                             | 2754 | F2 vs. M2 | + | Metabolism | Metabolism | glucan metabolic process                              | GO:0044042 | P | 126  | 1.36E-04 | 2.59E-03 |
| 7                                                                             | 2755 | F2 vs. M2 | + | Metabolism | Metabolism | glucosinolate biosynthetic process                    | GO:0019761 | P | 20   | 8.24E-04 | 1.13E-02 |
| 7                                                                             | 2756 | F2 vs. M2 | + | Metabolism | Metabolism | glucosyltransferase activity                          | GO:0046527 | F | 110  | 8.40E-04 | 2.34E-02 |
| 7                                                                             | 2757 | F2 vs. M2 | + | Metabolism | Metabolism | glutamine biosynthetic process                        | GO:0006542 | P | 5    | 3.24E-03 | 3.19E-02 |
| 7                                                                             | 2758 | F2 vs. M2 | + | Metabolism | Metabolism | glutamine family amino acid metabolic process         | GO:0009064 | P | 40   | 2.96E-03 | 2.99E-02 |
| 7                                                                             | 2759 | F2 vs. M2 | + | Metabolism | Metabolism | glutamine metabolic process                           | GO:0006541 | P | 13   | 9.49E-05 | 1.89E-03 |
| 7                                                                             | 2760 | F2 vs. M2 | + | Metabolism | Metabolism | glycerolipid metabolic process                        | GO:0046486 | P | 94   | 4.70E-03 | 4.22E-02 |
| 7                                                                             | 2761 | F2 vs. M2 | + | Metabolism | Metabolism | glycine decarboxylation via glycine cleavage system   | GO:0019464 | P | 5    | 2.28E-03 | 2.47E-02 |
| 7                                                                             | 2762 | F2 vs. M2 | + | Metabolism | Metabolism | glycine metabolic process                             | GO:0006544 | P | 11   | 5.87E-05 | 1.29E-03 |
| 7                                                                             | 2763 | F2 vs. M2 | + | Metabolism | Metabolism | glycosaminoglycan biosynthetic process                | GO:0006024 | P | 4    | 3.68E-03 | 3.47E-02 |
| 7                                                                             | 2764 | F2 vs. M2 | + | Metabolism | Metabolism | glycosaminoglycan metabolic process                   | GO:0030203 | P | 4    | 3.68E-03 | 3.48E-02 |
| 7                                                                             | 2765 | F2 vs. M2 | + | Metabolism | Metabolism | glycosinolate biosynthetic process                    | GO:0019758 | P | 20   | 8.24E-04 | 1.12E-02 |
| 7                                                                             | 2766 | F2 vs. M2 | + | Metabolism | Metabolism | glycosyl compound biosynthetic process                | GO:1901659 | P | 33   | 2.18E-03 | 2.37E-02 |
| 7                                                                             | 2767 | F2 vs. M2 | + | Metabolism | Metabolism | hydrocarbon metabolic process                         | GO:0120252 | P | 37   | 1.81E-03 | 2.07E-02 |
| 7                                                                             | 2768 | F2 vs. M2 | + | Metabolism | Metabolism | hydrolase activity                                    | GO:0016787 | F | 1476 | 2.40E-03 | 4.86E-02 |
| 7                                                                             | 2769 | F2 vs. M2 | + | Metabolism | Metabolism | hydrolase activity, hydrolyzing O-glycosyl compounds  | GO:0004553 | F | 184  | 1.26E-04 | 5.39E-03 |
| 7                                                                             | 2770 | F2 vs. M2 | + | Metabolism | Metabolism | hydro-lyase activity                                  | GO:0016836 | F | 54   | 9.92E-04 | 2.63E-02 |
| 7                                                                             | 2771 | F2 vs. M2 | + | Metabolism | Metabolism | indole-containing compound metabolic process          | GO:0042430 | P | 39   | 2.83E-03 | 2.89E-02 |
| 7                                                                             | 2772 | F2 vs. M2 | + | Metabolism | Metabolism | inositol biosynthetic process                         | GO:0006021 | P | 4    | 4.93E-03 | 4.37E-02 |
| 7                                                                             | 2773 | F2 vs. M2 | + | Metabolism | Metabolism | inositol metabolic process                            | GO:0006020 | P | 11   | 2.85E-03 | 2.91E-02 |
| intramolecular oxidoreductase activity, interconverting aldoses and ketoses   |      |           |   |            |            |                                                       | GO:0016861 | F | 14   | 1.61E-03 | 3.74E-02 |
| 7                                                                             | 2775 | F2 vs. M2 | + | Metabolism | Metabolism | ion binding                                           | GO:0043167 | F | 1401 | 1.61E-08 | 2.72E-06 |
| 7                                                                             | 2776 | F2 vs. M2 | + | Metabolism | Metabolism | leucine metabolic process                             | GO:0006551 | P | 17   | 8.91E-04 | 1.20E-02 |
| 7                                                                             | 2777 | F2 vs. M2 | + | Metabolism | Metabolism | lignin biosynthetic process                           | GO:0009809 | P | 27   | 5.88E-06 | 1.91E-04 |
| 7                                                                             | 2778 | F2 vs. M2 | + | Metabolism | Metabolism | lignin metabolic process                              | GO:0009808 | P | 33   | 1.31E-06 | 5.44E-05 |
| 7                                                                             | 2779 | F2 vs. M2 | + | Metabolism | Metabolism | lipid biosynthetic process                            | GO:0008610 | P | 275  | 2.23E-03 | 2.42E-02 |
| 7                                                                             | 2780 | F2 vs. M2 | + | Metabolism | Metabolism | lipid metabolic process                               | GO:0006629 | P | 433  | 1.00E-06 | 4.35E-05 |
| 7                                                                             | 2781 | F2 vs. M2 | + | Metabolism | Metabolism | lipid modification                                    | GO:0030258 | P | 59   | 4.89E-04 | 7.63E-03 |
| 7                                                                             | 2782 | F2 vs. M2 | + | Metabolism | Metabolism | localization                                          | GO:0051179 | P | 1277 | 2.17E-07 | 1.12E-05 |
| 7                                                                             | 2783 | F2 vs. M2 | + | Metabolism | Metabolism | L-phenylalanine metabolic process                     | GO:0006558 | P | 15   | 3.69E-03 | 3.47E-02 |
| 7                                                                             | 2784 | F2 vs. M2 | + | Metabolism | Metabolism | lyase activity                                        | GO:0016829 | F | 191  | 2.54E-07 | 3.43E-05 |
| 7                                                                             | 2785 | F2 vs. M2 | + | Metabolism | Metabolism | metal ion binding                                     | GO:0046872 | F | 811  | 1.16E-06 | 1.25E-04 |
| 7                                                                             | 2786 | F2 vs. M2 | + | Metabolism | Metabolism | methionine adenosyltransferase activity               | GO:0004478 | F | 4    | 2.16E-03 | 4.52E-02 |
| 7                                                                             | 2787 | F2 vs. M2 | + | Metabolism | Metabolism | monocarboxylic acid biosynthetic process              | GO:0072330 | P | 129  | 2.67E-03 | 2.78E-02 |
| 7                                                                             | 2788 | F2 vs. M2 | + | Metabolism | Metabolism | monocarboxylic acid metabolic process                 | GO:0032787 | P | 260  | 3.07E-09 | 3.34E-07 |
| 7                                                                             | 2789 | F2 vs. M2 | + | Metabolism | Metabolism | monosaccharide metabolic process                      | GO:0005996 | P | 79   | 1.80E-06 | 6.95E-05 |
| 7                                                                             | 2790 | F2 vs. M2 | + | Metabolism | Metabolism | nitrate assimilation                                  | GO:0042128 | P | 10   | 9.22E-05 | 1.88E-03 |
| 7                                                                             | 2791 | F2 vs. M2 | + | Metabolism | Metabolism | nitrate metabolic process                             | GO:0042126 | P | 10   | 9.22E-05 | 1.88E-03 |
| 7                                                                             | 2792 | F2 vs. M2 | + | Metabolism | Metabolism |                                                       |            |   |      |          |          |

|   |      |           |   |            |                |                                                   |            |   |      |          |          |
|---|------|-----------|---|------------|----------------|---------------------------------------------------|------------|---|------|----------|----------|
| 7 | 2793 | F2 vs. M2 | + | Metabolism | Metabolism     | nitrogen cycle metabolic process                  | GO:0071941 | P | 11   | 1.38E-04 | 2.61E-03 |
| 7 | 2794 | F2 vs. M2 | + | Metabolism | Metabolism     | nitrogen utilization                              | GO:0019740 | P | 6    | 1.41E-03 | 1.71E-02 |
| 7 | 2795 | F2 vs. M2 | + | Metabolism | Metabolism     | olefinic compound metabolic process               | GO:0120254 | P | 31   | 2.03E-03 | 2.26E-02 |
| 7 | 2796 | F2 vs. M2 | + | Metabolism | Metabolism     | organic acid biosynthetic process                 | GO:0016053 | P | 278  | 6.36E-08 | 3.95E-06 |
| 7 | 2797 | F2 vs. M2 | + | Metabolism | Metabolism     | organic acid metabolic process                    | GO:0006082 | P | 574  | 0.00E+00 | 0.00E+00 |
| 7 | 2798 | F2 vs. M2 | + | Metabolism | Metabolism     | organic hydroxy compound biosynthetic process     | GO:1901617 | P | 97   | 1.04E-03 | 1.32E-02 |
| 7 | 2799 | F2 vs. M2 | + | Metabolism | Metabolism     | organic hydroxy compound metabolic process        | GO:1901615 | P | 164  | 5.08E-07 | 2.38E-05 |
| 7 | 2800 | F2 vs. M2 | + | Metabolism | Metabolism     | organophosphate metabolic process                 | GO:0019637 | P | 335  | 1.39E-05 | 3.88E-04 |
| 7 | 2801 | F2 vs. M2 | + | Metabolism | Metabolism     | oxidation-reduction process                       | GO:0055114 | P | 420  | 0.00E+00 | 0.00E+00 |
| 7 | 2802 | F2 vs. M2 | + | Metabolism | Metabolism     | oxoacid metabolic process                         | GO:0043436 | P | 573  | 0.00E+00 | 0.00E+00 |
| 7 | 2803 | F2 vs. M2 | + | Metabolism | Metabolism     | pectin metabolic process                          | GO:0045488 | P | 88   | 4.43E-07 | 2.13E-05 |
| 7 | 2804 | F2 vs. M2 | + | Metabolism | Metabolism     | pectinesterase activity                           | GO:0030599 | F | 44   | 2.54E-03 | 4.97E-02 |
| 7 | 2805 | F2 vs. M2 | + | Metabolism | Metabolism     | pectinesterase inhibitor activity                 | GO:0046910 | F | 36   | 5.05E-04 | 1.71E-02 |
| 7 | 2806 | F2 vs. M2 | + | Metabolism | Metabolism     | phenylpropanoid biosynthetic process              | GO:0009699 | P | 52   | 4.41E-05 | 1.04E-03 |
| 7 | 2807 | F2 vs. M2 | + | Metabolism | Metabolism     | phenylpropanoid metabolic process                 | GO:0009698 | P | 65   | 9.44E-06 | 2.80E-04 |
| 7 | 2808 | F2 vs. M2 | + | Metabolism | Metabolism     | phospholipid metabolic process                    | GO:0006644 | P | 112  | 4.86E-03 | 4.33E-02 |
| 7 | 2809 | F2 vs. M2 | + | Metabolism | Metabolism     | phosphoric ester hydrolase activity               | GO:0042578 | F | 191  | 7.84E-05 | 4.00E-03 |
| 7 | 2810 | F2 vs. M2 | + | Metabolism | Metabolism     | phosphorus metabolic process                      | GO:0006793 | P | 969  | 7.68E-04 | 1.08E-02 |
| 7 | 2811 | F2 vs. M2 | + | Metabolism | Metabolism     | pigment biosynthetic process                      | GO:0046148 | P | 74   | 2.06E-03 | 2.29E-02 |
| 7 | 2812 | F2 vs. M2 | + | Metabolism | Metabolism     | pigment metabolic process                         | GO:0042440 | P | 89   | 1.13E-03 | 1.41E-02 |
| 7 | 2813 | F2 vs. M2 | + | Metabolism | Metabolism     | polyol metabolic process                          | GO:0019751 | P | 36   | 1.35E-04 | 2.60E-03 |
| 7 | 2814 | F2 vs. M2 | + | Metabolism | Metabolism     | poly-pyrimidine tract binding                     | GO:0008187 | F | 22   | 2.04E-03 | 4.31E-02 |
| 7 | 2815 | F2 vs. M2 | + | Metabolism | Metabolism     | purine nucleotide metabolic process               | GO:0006163 | P | 134  | 3.87E-03 | 3.60E-02 |
| 7 | 2816 | F2 vs. M2 | + | Metabolism | Metabolism     | purine ribonucleotide metabolic process           | GO:0009150 | P | 126  | 3.16E-03 | 3.14E-02 |
| 7 | 2817 | F2 vs. M2 | + | Metabolism | Metabolism     | purine-containing compound metabolic process      | GO:0072521 | P | 146  | 5.97E-03 | 4.98E-02 |
| 7 | 2818 | F2 vs. M2 | + | Metabolism | Metabolism     | pyridoxal phosphate binding                       | GO:0030170 | F | 62   | 5.50E-04 | 1.81E-02 |
| 7 | 2819 | F2 vs. M2 | + | Metabolism | Metabolism     | S-adenosylmethionine biosynthetic process         | GO:0006556 | P | 4    | 2.16E-03 | 2.35E-02 |
| 7 | 2820 | F2 vs. M2 | + | Metabolism | Metabolism     | S-adenosylmethionine metabolic process            | GO:0046500 | P | 7    | 9.28E-05 | 1.86E-03 |
| 7 | 2821 | F2 vs. M2 | + | Metabolism | Metabolism     | secondary alcohol metabolic process               | GO:1902652 | P | 10   | 1.04E-03 | 1.32E-02 |
| 7 | 2822 | F2 vs. M2 | + | Metabolism | Metabolism     | secondary metabolic process                       | GO:0019748 | P | 152  | 9.12E-08 | 5.18E-06 |
| 7 | 2823 | F2 vs. M2 | + | Metabolism | Metabolism     | secondary metabolite biosynthetic process         | GO:0044550 | P | 83   | 4.75E-08 | 3.13E-06 |
| 7 | 2824 | F2 vs. M2 | + | Metabolism | Metabolism     | serine family amino acid biosynthetic process     | GO:0009070 | P | 25   | 4.58E-03 | 4.12E-02 |
| 7 | 2825 | F2 vs. M2 | + | Metabolism | Metabolism     | serine family amino acid metabolic process        | GO:0009069 | P | 36   | 3.39E-05 | 8.34E-04 |
| 7 | 2826 | F2 vs. M2 | + | Metabolism | Metabolism     | S-glycoside biosynthetic process                  | GO:0016144 | P | 20   | 8.24E-04 | 1.13E-02 |
| 7 | 2827 | F2 vs. M2 | + | Metabolism | Metabolism     | sigma factor activity                             | GO:0016987 | F | 6    | 2.49E-03 | 4.99E-02 |
| 7 | 2828 | F2 vs. M2 | + | Metabolism | Metabolism     | small molecule binding                            | GO:0036094 | F | 670  | 3.09E-04 | 1.08E-02 |
| 7 | 2829 | F2 vs. M2 | + | Metabolism | Metabolism     | small molecule biosynthetic process               | GO:0044283 | P | 387  | 5.35E-12 | 1.02E-09 |
| 7 | 2830 | F2 vs. M2 | + | Metabolism | Metabolism     | small molecule metabolic process                  | GO:0044281 | P | 866  | 0.00E+00 | 0.00E+00 |
| 7 | 2831 | F2 vs. M2 | + | Metabolism | Metabolism     | spermidine biosynthetic process                   | GO:0008295 | P | 3    | 5.01E-03 | 4.40E-02 |
| 7 | 2832 | F2 vs. M2 | + | Metabolism | Metabolism     | sulfur amino acid metabolic process               | GO:0000096 | P | 34   | 7.85E-04 | 1.10E-02 |
| 7 | 2833 | F2 vs. M2 | + | Metabolism | Metabolism     | sulfur compound biosynthetic process              | GO:0044272 | P | 86   | 6.84E-10 | 8.49E-08 |
| 7 | 2834 | F2 vs. M2 | + | Metabolism | Metabolism     | sulfur compound metabolic process                 | GO:0006790 | P | 191  | 5.05E-10 | 6.74E-08 |
| 7 | 2835 | F2 vs. M2 | + | Metabolism | Metabolism     | tetrapyrrole binding                              | GO:0046906 | F | 186  | 1.22E-03 | 3.07E-02 |
| 7 | 2836 | F2 vs. M2 | + | Metabolism | Metabolism     | transferase activity, transferring hexosyl groups | GO:0016758 | F | 187  | 2.43E-03 | 4.90E-02 |
| 7 | 2837 | F2 vs. M2 | + | Metabolism | Metabolism     | UDP-glucosyltransferase activity                  | GO:0035251 | F | 79   | 2.94E-04 | 1.06E-02 |
| 7 | 2838 | F2 vs. M2 | + | Metabolism | Metabolism     | UDP-glucuronate biosynthetic process              | GO:0006065 | P | 4    | 3.68E-03 | 3.48E-02 |
| 7 | 2839 | F2 vs. M2 | + | Metabolism | Metabolism     | UDP-glucuronate metabolic process                 | GO:0046398 | P | 4    | 3.68E-03 | 3.46E-02 |
| 7 | 2840 | F2 vs. M2 | + | Metabolism | Metabolism     | UDP-glycosyltransferase activity                  | GO:0008194 | F | 141  | 1.05E-04 | 4.74E-03 |
| 7 | 2841 | F2 vs. M2 | + | Metabolism | Metabolism     | UDP-rhamnose biosynthetic process                 | GO:0010253 | P | 4    | 2.72E-03 | 2.82E-02 |
| 7 | 2842 | F2 vs. M2 | + | Metabolism | Metabolism     | UDP-rhamnose metabolic process                    | GO:0033478 | P | 4    | 2.72E-03 | 2.82E-02 |
| 7 | 2843 | F2 vs. M2 | + | Metabolism | Metabolism     | vitamin B6 binding                                | GO:0070279 | F | 62   | 5.50E-04 | 1.83E-02 |
| 7 | 2844 | F2 vs. M2 | + | Metabolism | Photosynthesis | carbon fixation                                   | GO:0015977 | P | 15   | 3.42E-07 | 1.69E-05 |
| 7 | 2845 | F2 vs. M2 | + | Metabolism | Photosynthesis | chlorophyll metabolic process                     | GO:0015994 | P | 42   | 2.66E-03 | 2.78E-02 |
| 7 | 2846 | F2 vs. M2 | + | Metabolism | Photosynthesis | chloroplast                                       | GO:0009507 | C | 2503 | 0.00E+00 | 0.00E+00 |
| 7 | 2847 | F2 vs. M2 | + | Metabolism | Photosynthesis | chloroplast envelope                              | GO:0009941 | C | 415  | 0.00E+00 | 0.00E+00 |
| 7 | 2848 | F2 vs. M2 | + | Metabolism | Photosynthesis | chloroplast stroma                                | GO:0009570 | C | 469  | 0.00E+00 | 0.00E+00 |
| 7 | 2849 | F2 vs. M2 | + | Metabolism | Photosynthesis | chloroplast thylakoid                             | GO:0009534 | C | 288  | 0.00E+00 | 0.00E+00 |
| 7 | 2850 | F2 vs. M2 | + | Metabolism | Photosynthesis | chloroplast thylakoid lumen                       | GO:0009543 | C | 29   | 1.07E-03 | 8.08E-03 |
| 7 | 2851 | F2 vs. M2 | + | Metabolism | Photosynthesis | chloroplast thylakoid membrane                    | GO:0009535 | C | 238  | 0.00E+00 | 0.00E+00 |
| 7 | 2852 | F2 vs. M2 | + | Metabolism | Photosynthesis | chloroplast thylakoid membrane protein complex    | GO:0098807 | C | 20   | 3.29E-03 | 2.14E-02 |
| 7 | 2853 | F2 vs. M2 | + | Metabolism | Photosynthesis | fructose 1,6-bisphosphate metabolic process       | GO:0030388 | P | 9    | 3.47E-04 | 5.76E-03 |
| 7 | 2854 | F2 vs. M2 | + | Metabolism | Photosynthesis | fructose-bisphosphate aldolase activity           | GO:0004332 | F | 6    | 2.03E-03 | 4.36E-02 |
| 7 | 2855 | F2 vs. M2 | + | Metabolism | Photosynthesis | negative regulation of photosynthesis             | GO:1905156 | P | 12   | 3.34E-03 | 3.25E-02 |
| 7 | 2856 | F2 vs. M2 | + | Metabolism | Photosynthesis | oxidative photosynthetic carbon pathway           | GO:0009854 | P | 4    | 2.86E-03 | 2.91E-02 |

|   |      |           |   |            |                |                                                                |            |   |      |          |          |
|---|------|-----------|---|------------|----------------|----------------------------------------------------------------|------------|---|------|----------|----------|
| 7 | 2857 | F2 vs. M2 | + | Metabolism | Photosynthesis | photosynthesis                                                 | GO:0015979 | P | 132  | 1.11E-16 | 5.93E-14 |
| 7 | 2858 | F2 vs. M2 | + | Metabolism | Photosynthesis | photosynthesis, dark reaction                                  | GO:0019685 | P | 15   | 5.91E-07 | 2.72E-05 |
| 7 | 2859 | F2 vs. M2 | + | Metabolism | Photosynthesis | photosynthesis, light harvesting                               | GO:0009765 | P | 28   | 4.50E-05 | 1.04E-03 |
| 7 | 2860 | F2 vs. M2 | + | Metabolism | Photosynthesis | photosynthesis, light harvesting in photosystem I              | GO:0009768 | P | 16   | 3.57E-03 | 3.42E-02 |
| 7 | 2861 | F2 vs. M2 | + | Metabolism | Photosynthesis | photosynthesis, light reaction                                 | GO:0019684 | P | 87   | 1.31E-12 | 2.79E-10 |
| 7 | 2862 | F2 vs. M2 | + | Metabolism | Photosynthesis | photosynthetic electron transport chain                        | GO:0009767 | P | 33   | 1.49E-04 | 2.75E-03 |
| 7 | 2863 | F2 vs. M2 | + | Metabolism | Photosynthesis | photosynthetic electron transport in photosystem I             | GO:0009773 | P | 13   | 1.73E-03 | 2.00E-02 |
| 7 | 2864 | F2 vs. M2 | + | Metabolism | Photosynthesis | photosynthetic membrane                                        | GO:0034357 | C | 257  | 0.00E+00 | 0.00E+00 |
| 7 | 2865 | F2 vs. M2 | + | Metabolism | Photosynthesis | photosystem                                                    | GO:0009521 | C | 41   | 5.62E-03 | 3.30E-02 |
| 7 | 2866 | F2 vs. M2 | + | Metabolism | Photosynthesis | photosystem II                                                 | GO:0009523 | C | 27   | 5.68E-03 | 3.31E-02 |
| 7 | 2867 | F2 vs. M2 | + | Metabolism | Photosynthesis | photosystem II assembly                                        | GO:0010207 | P | 20   | 1.64E-03 | 1.93E-02 |
| 7 | 2868 | F2 vs. M2 | + | Metabolism | Photosynthesis | photosystem II oxygen evolving complex                         | GO:0009654 | C | 12   | 3.63E-03 | 2.31E-02 |
| 7 | 2869 | F2 vs. M2 | + | Metabolism | Photosynthesis | photosystem II repair                                          | GO:0010206 | P | 10   | 1.82E-03 | 2.07E-02 |
| 7 | 2870 | F2 vs. M2 | + | Metabolism | Photosynthesis | plastid                                                        | GO:0009536 | C | 2778 | 9.99E-16 | 3.65E-14 |
| 7 | 2871 | F2 vs. M2 | + | Metabolism | Photosynthesis | plastid envelope                                               | GO:0009526 | C | 433  | 0.00E+00 | 0.00E+00 |
| 7 | 2872 | F2 vs. M2 | + | Metabolism | Photosynthesis | plastid stroma                                                 | GO:0009532 | C | 473  | 0.00E+00 | 0.00E+00 |
| 7 | 2873 | F2 vs. M2 | + | Metabolism | Photosynthesis | plastid thylakoid                                              | GO:0031976 | C | 290  | 0.00E+00 | 0.00E+00 |
| 7 | 2874 | F2 vs. M2 | + | Metabolism | Photosynthesis | plastid thylakoid lumen                                        | GO:0031978 | C | 29   | 1.07E-03 | 8.01E-03 |
| 7 | 2875 | F2 vs. M2 | + | Metabolism | Photosynthesis | plastid thylakoid membrane                                     | GO:0055035 | C | 241  | 0.00E+00 | 0.00E+00 |
| 7 | 2876 | F2 vs. M2 | + | Metabolism | Photosynthesis | plastid translation                                            | GO:0032544 | P | 17   | 3.57E-03 | 3.41E-02 |
| 7 | 2877 | F2 vs. M2 | + | Metabolism | Photosynthesis | plastoglobule                                                  | GO:0010287 | C | 51   | 5.27E-07 | 7.37E-06 |
| 7 | 2878 | F2 vs. M2 | + | Metabolism | Photosynthesis | regulation of generation of precursor metabolites and energy   | GO:0043467 | P | 22   | 3.88E-03 | 3.60E-02 |
| 7 | 2879 | F2 vs. M2 | + | Metabolism | Photosynthesis | regulation of photosynthesis                                   | GO:0010109 | P | 27   | 1.75E-05 | 4.69E-04 |
| 7 | 2880 | F2 vs. M2 | + | Metabolism | Photosynthesis | regulation of photosynthesis, light reaction                   | GO:0042548 | P | 17   | 1.10E-03 | 1.38E-02 |
| 7 | 2881 | F2 vs. M2 | + | Metabolism | Photosynthesis | thylakoid                                                      | GO:0009579 | C | 349  | 0.00E+00 | 0.00E+00 |
| 7 | 2882 | F2 vs. M2 | + | Metabolism | Photosynthesis | thylakoid lumen                                                | GO:0031977 | C | 39   | 5.56E-06 | 6.52E-05 |
| 7 | 2883 | F2 vs. M2 | + | Metabolism | Photosynthesis | thylakoid membrane                                             | GO:0042651 | C | 255  | 0.00E+00 | 0.00E+00 |
| 7 | 2884 | F2 vs. M2 | + | Metabolism | Photosynthesis | thylakoid membrane organization                                | GO:0010027 | P | 26   | 4.93E-03 | 4.37E-02 |
| 7 | 2885 | F2 vs. M2 | + | Metabolism | Transporters   | active ion transmembrane transporter activity                  | GO:0022853 | F | 114  | 1.01E-12 | 3.91E-10 |
| 7 | 2886 | F2 vs. M2 | + | Metabolism | Transporters   | active transmembrane transporter activity                      | GO:0022804 | F | 267  | 3.96E-14 | 2.68E-11 |
| 7 | 2887 | F2 vs. M2 | + | Metabolism | Transporters   | amino acid transmembrane transport                             | GO:0003333 | P | 18   | 8.97E-04 | 1.21E-02 |
| 7 | 2888 | F2 vs. M2 | + | Metabolism | Transporters   | anion transmembrane transport                                  | GO:0098656 | P | 65   | 1.61E-03 | 1.91E-02 |
| 7 | 2889 | F2 vs. M2 | + | Metabolism | Transporters   | anion transmembrane transporter activity                       | GO:0008509 | F | 197  | 1.13E-05 | 8.51E-04 |
| 7 | 2890 | F2 vs. M2 | + | Metabolism | Transporters   | anion transport                                                | GO:0006820 | P | 158  | 1.84E-04 | 3.32E-03 |
| 7 | 2891 | F2 vs. M2 | + | Metabolism | Transporters   | anion:anion antiporter activity                                | GO:0015301 | F | 19   | 2.64E-05 | 1.66E-03 |
| 7 | 2892 | F2 vs. M2 | + | Metabolism | Transporters   | antiporter activity                                            | GO:0015297 | F | 102  | 9.81E-10 | 2.21E-07 |
| 7 | 2893 | F2 vs. M2 | + | Metabolism | Transporters   | ATPase-coupled cation transmembrane transporter activity       | GO:0019829 | F | 40   | 4.00E-05 | 2.35E-03 |
| 7 | 2894 | F2 vs. M2 | + | Metabolism | Transporters   | ATPase-coupled ion transmembrane transporter activity          | GO:0042625 | F | 48   | 2.85E-05 | 1.75E-03 |
| 7 | 2895 | F2 vs. M2 | + | Metabolism | Transporters   | ATPase-coupled transmembrane transporter activity              | GO:0042626 | F | 111  | 4.28E-05 | 2.46E-03 |
| 7 | 2896 | F2 vs. M2 | + | Metabolism | Transporters   | C4-dicarboxylate transmembrane transporter activity            | GO:0015556 | F | 6    | 6.36E-04 | 1.95E-02 |
| 7 | 2897 | F2 vs. M2 | + | Metabolism | Transporters   | calcium ion transmembrane transport                            | GO:0070588 | P | 20   | 2.10E-03 | 2.31E-02 |
| 7 | 2898 | F2 vs. M2 | + | Metabolism | Transporters   | carbohydrate transmembrane transporter activity                | GO:0015144 | F | 66   | 3.45E-05 | 2.07E-03 |
| 7 | 2899 | F2 vs. M2 | + | Metabolism | Transporters   | carbohydrate transport                                         | GO:0008643 | P | 43   | 3.29E-03 | 3.23E-02 |
| 7 | 2900 | F2 vs. M2 | + | Metabolism | Transporters   | carboxylic acid transmembrane transport                        | GO:1905039 | P | 36   | 5.40E-03 | 4.60E-02 |
| 7 | 2901 | F2 vs. M2 | + | Metabolism | Transporters   | carboxylic acid transmembrane transporter activity             | GO:0046943 | F | 80   | 2.35E-03 | 4.84E-02 |
| 7 | 2902 | F2 vs. M2 | + | Metabolism | Transporters   | cation transmembrane transport                                 | GO:0098655 | P | 132  | 1.42E-05 | 3.92E-04 |
| 7 | 2903 | F2 vs. M2 | + | Metabolism | Transporters   | cation transmembrane transporter activity                      | GO:0008324 | F | 221  | 2.81E-09 | 5.83E-07 |
| 7 | 2904 | F2 vs. M2 | + | Metabolism | Transporters   | cation transport                                               | GO:0006812 | P | 205  | 1.09E-05 | 3.15E-04 |
| 7 | 2905 | F2 vs. M2 | + | Metabolism | Transporters   | chemotaxis                                                     | GO:0006935 | P | 15   | 5.29E-03 | 4.53E-02 |
| 7 | 2906 | F2 vs. M2 | + | Metabolism | Transporters   | cytoplasmic vesicle                                            | GO:0031410 | C | 395  | 2.73E-07 | 4.19E-06 |
| 7 | 2907 | F2 vs. M2 | + | Metabolism | Transporters   | dicarboxylic acid transport                                    | GO:0006835 | P | 13   | 6.82E-04 | 9.89E-03 |
| 7 | 2908 | F2 vs. M2 | + | Metabolism | Transporters   | endosome                                                       | GO:0005768 | C | 234  | 4.45E-05 | 4.50E-04 |
| 7 | 2909 | F2 vs. M2 | + | Metabolism | Transporters   | inorganic anion transmembrane transporter activity             | GO:0015103 | F | 62   | 6.05E-05 | 3.27E-03 |
| 7 | 2910 | F2 vs. M2 | + | Metabolism | Transporters   | inorganic cation transmembrane transport                       | GO:0098662 | P | 126  | 1.28E-05 | 3.63E-04 |
| 7 | 2911 | F2 vs. M2 | + | Metabolism | Transporters   | inorganic cation transmembrane transporter activity            | GO:0022890 | F | 197  | 1.08E-08 | 1.94E-06 |
| 7 | 2912 | F2 vs. M2 | + | Metabolism | Transporters   | inorganic ion transmembrane transport                          | GO:0098660 | P | 139  | 2.11E-06 | 8.09E-05 |
| 7 | 2913 | F2 vs. M2 | + | Metabolism | Transporters   | inorganic molecular entity transmembrane transporter activity  | GO:0015318 | F | 356  | 5.07E-14 | 2.74E-11 |
| 7 | 2914 | F2 vs. M2 | + | Metabolism | Transporters   | ion transmembrane transport                                    | GO:0034220 | P | 190  | 5.03E-08 | 3.27E-06 |
| 7 | 2915 | F2 vs. M2 | + | Metabolism | Transporters   | ion transmembrane transporter activity                         | GO:0015075 | F | 396  | 1.70E-11 | 5.09E-09 |
| 7 | 2916 | F2 vs. M2 | + | Metabolism | Transporters   | ion transport                                                  | GO:0006811 | P | 348  | 1.28E-08 | 1.07E-06 |
| 7 | 2917 | F2 vs. M2 | + | Metabolism | Transporters   | malate transmembrane transporter activity                      | GO:0015140 | F | 6    | 6.36E-04 | 1.97E-02 |
| 7 | 2918 | F2 vs. M2 | + | Metabolism | Transporters   | monovalent inorganic cation transmembrane transporter activity | GO:0015077 | F | 118  | 5.77E-08 | 8.65E-06 |
| 7 | 2919 | F2 vs. M2 | + | Metabolism | Transporters   | monovalent inorganic cation transport                          | GO:0015672 | P | 91   | 3.27E-05 | 8.08E-04 |

|   |      |           |   |                        |                      |                                                              |            |   |      |          |          |
|---|------|-----------|---|------------------------|----------------------|--------------------------------------------------------------|------------|---|------|----------|----------|
| 7 | 2920 | F2 vs. M2 | + | Metabolism             | Transporters         | neutral amino acid transmembrane transporter activity        | GO:0015175 | F | 11   | 6.17E-04 | 1.96E-02 |
| 7 | 2921 | F2 vs. M2 | + | Metabolism             | Transporters         | one-carbon compound transport                                | GO:0019755 | P | 6    | 2.11E-03 | 2.31E-02 |
| 7 | 2922 | F2 vs. M2 | + | Metabolism             | Transporters         | organic acid transmembrane transporter activity              | GO:0005342 | F | 80   | 2.35E-03 | 4.80E-02 |
| 7 | 2923 | F2 vs. M2 | + | Metabolism             | Transporters         | organic anion transport                                      | GO:0015711 | P | 102  | 1.81E-03 | 2.07E-02 |
| 7 | 2924 | F2 vs. M2 | + | Metabolism             | Transporters         | positive chemotaxis                                          | GO:0050918 | P | 15   | 5.29E-03 | 4.55E-02 |
| 7 | 2925 | F2 vs. M2 | + | Metabolism             | Transporters         | primary active transmembrane transporter activity            | GO:0015399 | F | 128  | 2.09E-04 | 8.43E-03 |
| 7 | 2926 | F2 vs. M2 | + | Metabolism             | Transporters         | proton transmembrane transporter activity                    | GO:0015078 | F | 92   | 2.65E-08 | 4.21E-06 |
| 7 | 2927 | F2 vs. M2 | + | Metabolism             | Transporters         | secondary active transmembrane transporter activity          | GO:0015291 | F | 137  | 8.22E-12 | 2.78E-09 |
| 7 | 2928 | F2 vs. M2 | + | Metabolism             | Transporters         | secretory vesicle                                            | GO:0099503 | C | 98   | 4.88E-04 | 3.96E-03 |
| 7 | 2929 | F2 vs. M2 | + | Metabolism             | Transporters         | solute:anion antiporter activity                             | GO:0140323 | F | 19   | 2.64E-05 | 1.70E-03 |
| 7 | 2930 | F2 vs. M2 | + | Metabolism             | Transporters         | solute:proton symporter activity                             | GO:0015295 | F | 16   | 1.18E-03 | 3.00E-02 |
| 7 | 2931 | F2 vs. M2 | + | Metabolism             | Transporters         | trans-Golgi network                                          | GO:0005802 | C | 178  | 1.18E-09 | 2.66E-08 |
| 7 | 2932 | F2 vs. M2 | + | Metabolism             | Transporters         | transmembrane transport                                      | GO:0055085 | P | 473  | 5.13E-14 | 1.61E-11 |
| 7 | 2933 | F2 vs. M2 | + | Metabolism             | Transporters         | transmembrane transporter activity                           | GO:0022857 | F | 665  | 0.00E+00 | 0.00E+00 |
| 7 | 2934 | F2 vs. M2 | + | Metabolism             | Transporters         | transport                                                    | GO:0006810 | P | 1165 | 4.35E-08 | 2.90E-06 |
| 7 | 2935 | F2 vs. M2 | + | Metabolism             | Transporters         | transporter activity                                         | GO:0005215 | F | 688  | 0.00E+00 | 0.00E+00 |
| 7 | 2936 | F2 vs. M2 | + | Metabolism             | Transporters         | urea transmembrane transporter activity                      | GO:0015204 | F | 5    | 1.31E-03 | 3.15E-02 |
| 7 | 2937 | F2 vs. M2 | + | Metabolism             | Transporters         | urea transport                                               | GO:0015840 | P | 4    | 5.93E-03 | 4.95E-02 |
| 7 | 2938 | F2 vs. M2 | + | Metabolism             | Transporters         | vesicle                                                      | GO:0031982 | C | 421  | 5.59E-08 | 1.00E-06 |
| 7 | 2939 | F2 vs. M2 | + | Metabolism             | Transporters         | water channel activity                                       | GO:0015250 | F | 20   | 1.12E-04 | 4.89E-03 |
| 7 | 2940 | F2 vs. M2 | + | Metabolism             | Transporters         | water transmembrane transporter activity                     | GO:0005372 | F | 20   | 1.12E-04 | 4.97E-03 |
| 7 | 2941 | F2 vs. M2 | + | Metabolism             | Transporters         | xenobiotic transmembrane transporter activity                | GO:0042910 | F | 40   | 6.63E-04 | 1.99E-02 |
| 7 | 2942 | F2 vs. M2 | + | Regulation             | Protein modification | Golgi apparatus                                              | GO:0005794 | C | 634  | 1.55E-10 | 3.86E-09 |
| 7 | 2943 | F2 vs. M2 | + | Regulation             | Protein modification | Golgi membrane                                               | GO:0000139 | C | 59   | 4.49E-03 | 2.75E-02 |
| 7 | 2944 | F2 vs. M2 | + | Regulation             | Protein modification | protein disulfide oxidoreductase activity                    | GO:0015035 | F | 30   | 7.24E-04 | 2.10E-02 |
| 7 | 2945 | F2 vs. M2 | + | Regulation             | Regulation           | regulation of biological quality                             | GO:0065008 | P | 499  | 2.59E-03 | 2.73E-02 |
| 7 | 2946 | F2 vs. M2 | + | Regulation             | Regulation           | regulation of cell morphogenesis involved in differentiation | GO:0010769 | P | 26   | 8.31E-05 | 1.76E-03 |
| 7 | 2947 | F2 vs. M2 | + | Regulation             | Regulation           | regulation of pollen tube growth                             | GO:0080092 | P | 23   | 4.11E-06 | 1.40E-04 |
| 7 | 2948 | F2 vs. M2 | + | Regulation             | Translation          | poly(U) RNA binding                                          | GO:0008266 | F | 20   | 4.58E-04 | 1.57E-02 |
| 7 | 2949 | F2 vs. M2 | + | Signaling and response | Signaling            | acid phosphatase activity                                    | GO:0003993 | F | 23   | 7.55E-04 | 2.15E-02 |
| 7 | 2950 | F2 vs. M2 | + | Signaling and response | Signaling            | calcium ion binding                                          | GO:0005509 | F | 134  | 1.02E-06 | 1.15E-04 |
| 7 | 2951 | F2 vs. M2 | + | Signaling and response | Signaling            | cellular response to abiotic stimulus                        | GO:0071214 | P | 98   | 1.34E-03 | 1.63E-02 |
| 7 | 2952 | F2 vs. M2 | + | Signaling and response | Signaling            | cellular response to acid chemical                           | GO:0071229 | P | 24   | 4.57E-03 | 4.12E-02 |
| 7 | 2953 | F2 vs. M2 | + | Signaling and response | Signaling            | cellular response to chemical stimulus                       | GO:0070887 | P | 537  | 2.73E-03 | 2.81E-02 |
| 7 | 2954 | F2 vs. M2 | + | Signaling and response | Signaling            | cellular response to cold                                    | GO:0070417 | P | 17   | 2.61E-03 | 2.74E-02 |
| 7 | 2955 | F2 vs. M2 | + | Signaling and response | Signaling            | cellular response to environmental stimulus                  | GO:0104004 | P | 98   | 1.34E-03 | 1.63E-02 |
| 7 | 2956 | F2 vs. M2 | + | Signaling and response | Signaling            | cellular response to external stimulus                       | GO:0071496 | P | 125  | 2.70E-04 | 4.62E-03 |
| 7 | 2957 | F2 vs. M2 | + | Signaling and response | Signaling            | cellular response to extracellular stimulus                  | GO:0031668 | P | 120  | 5.95E-05 | 1.30E-03 |
| 7 | 2958 | F2 vs. M2 | + | Signaling and response | Signaling            | cellular response to light stimulus                          | GO:0071482 | P | 53   | 4.18E-03 | 3.82E-02 |
| 7 | 2959 | F2 vs. M2 | + | Signaling and response | Signaling            | cellular response to oxygen levels                           | GO:0071453 | P | 116  | 3.41E-03 | 3.32E-02 |
| 7 | 2960 | F2 vs. M2 | + | Signaling and response | Signaling            | cellular response to water stimulus                          | GO:0071462 | P | 21   | 4.93E-04 | 7.63E-03 |
| 7 | 2961 | F2 vs. M2 | + | Signaling and response | Signaling            | dephosphorylation                                            | GO:0016311 | P | 104  | 7.71E-05 | 1.65E-03 |
| 7 | 2962 | F2 vs. M2 | + | Signaling and response | Signaling            | disulfide oxidoreductase activity                            | GO:0015036 | F | 39   | 8.09E-06 | 6.43E-04 |
| 7 | 2963 | F2 vs. M2 | + | Signaling and response | Signaling            | phosphatase activity                                         | GO:0016791 | F | 165  | 2.54E-04 | 9.41E-03 |
| 7 | 2964 | F2 vs. M2 | + | Signaling and response | Signaling            | phosphatidylinositol dephosphorylation                       | GO:0046856 | P | 12   | 4.93E-03 | 4.38E-02 |
| 7 | 2965 | F2 vs. M2 | + | Signaling and response | Signaling            | phospholipase C activity                                     | GO:0004629 | F | 4    | 1.41E-03 | 3.38E-02 |
| 7 | 2966 | F2 vs. M2 | + | Signaling and response | Signaling            | phospholipid dephosphorylation                               | GO:0046839 | P | 12   | 4.93E-03 | 4.38E-02 |
| 7 | 2967 | F2 vs. M2 | + | Signaling and response | Signaling            | regulation of jasmonic acid mediated signaling pathway       | GO:2000022 | P | 24   | 2.31E-03 | 2.48E-02 |
| 7 | 2968 | F2 vs. M2 | + | Signaling and response | Signaling            | response to abiotic stimulus                                 | GO:0009628 | P | 1185 | 3.31E-13 | 8.41E-11 |
| 7 | 2969 | F2 vs. M2 | + | Signaling and response | Signaling            | response to acid chemical                                    | GO:0001101 | P | 237  | 7.64E-08 | 4.53E-06 |
| 7 | 2970 | F2 vs. M2 | + | Signaling and response | Signaling            | response to bacterium                                        | GO:0009617 | P | 278  | 2.04E-07 | 1.07E-05 |
| 7 | 2971 | F2 vs. M2 | + | Signaling and response | Signaling            | response to biotic stimulus                                  | GO:0009607 | P | 578  | 6.67E-09 | 6.59E-07 |
| 7 | 2972 | F2 vs. M2 | + | Signaling and response | Signaling            | response to cadmium ion                                      | GO:0046686 | P | 221  | 1.22E-09 | 1.42E-07 |
| 7 | 2973 | F2 vs. M2 | + | Signaling and response | Signaling            | response to chemical                                         | GO:0042221 | P | 1442 | 6.99E-15 | 2.67E-12 |
| 7 | 2974 | F2 vs. M2 | + | Signaling and response | Signaling            | response to chitin                                           | GO:0010200 | P | 67   | 1.08E-05 | 3.12E-04 |
| 7 | 2975 | F2 vs. M2 | + | Signaling and response | Signaling            | response to endogenous stimulus                              | GO:0009719 | P | 656  | 4.91E-04 | 7.63E-03 |
| 7 | 2976 | F2 vs. M2 | + | Signaling and response | Signaling            | response to external biotic stimulus                         | GO:0043207 | P | 577  | 6.75E-09 | 6.55E-07 |
| 7 | 2977 | F2 vs. M2 | + | Signaling and response | Signaling            | response to external stimulus                                | GO:0009605 | P | 801  | 4.42E-12 | 8.74E-10 |
| 7 | 2978 | F2 vs. M2 | + | Signaling and response | Signaling            | response to extracellular stimulus                           | GO:0009991 | P | 144  | 1.29E-06 | 5.37E-05 |
| 7 | 2979 | F2 vs. M2 | + | Signaling and response | Signaling            | response to hormone                                          | GO:0009725 | P | 651  | 4.41E-04 | 7.07E-03 |
| 7 | 2980 | F2 vs. M2 | + | Signaling and response | Signaling            | response to inorganic substance                              | GO:0010035 | P | 569  | 1.55E-15 | 6.38E-13 |
| 7 | 2981 | F2 vs. M2 | + | Signaling and response | Signaling            | response to jasmonic acid                                    | GO:0009753 | P | 109  | 1.40E-05 | 3.90E-04 |
| 7 | 2982 | F2 vs. M2 | + | Signaling and response | Signaling            | response to karrikin                                         | GO:0080167 | P | 78   | 3.06E-05 | 7.74E-04 |
| 7 | 2983 | F2 vs. M2 | + | Signaling and response | Signaling            | response to light intensity                                  | GO:0009642 | P | 87   | 8.88E-05 | 1.84E-03 |



|   |      |           |   |                        |           |                                                         |            |   |      |          |          |
|---|------|-----------|---|------------------------|-----------|---------------------------------------------------------|------------|---|------|----------|----------|
| 7 | 2984 | F2 vs. M2 | + | Signaling and response | Signaling | response to light stimulus                              | GO:0009416 | P | 399  | 6.94E-08 | 4.21E-06 |
| 7 | 2985 | F2 vs. M2 | + | Signaling and response | Signaling | response to lipid                                       | GO:0033993 | P | 381  | 9.02E-04 | 1.21E-02 |
| 7 | 2986 | F2 vs. M2 | + | Signaling and response | Signaling | response to metal ion                                   | GO:0010038 | P | 283  | 1.05E-08 | 9.07E-07 |
| 7 | 2987 | F2 vs. M2 | + | Signaling and response | Signaling | response to nitrogen compound                           | GO:1901698 | P | 148  | 7.25E-04 | 1.04E-02 |
| 7 | 2988 | F2 vs. M2 | + | Signaling and response | Signaling | response to nutrient levels                             | GO:0031667 | P | 123  | 1.86E-04 | 3.34E-03 |
| 7 | 2989 | F2 vs. M2 | + | Signaling and response | Signaling | response to organic substance                           | GO:0010033 | P | 897  | 2.55E-06 | 9.27E-05 |
| 7 | 2990 | F2 vs. M2 | + | Signaling and response | Signaling | response to oxygen levels                               | GO:0070482 | P | 133  | 3.87E-03 | 3.60E-02 |
| 7 | 2991 | F2 vs. M2 | + | Signaling and response | Signaling | response to oxygen-containing compound                  | GO:1901700 | P | 839  | 5.11E-14 | 1.70E-11 |
| 7 | 2992 | F2 vs. M2 | + | Signaling and response | Signaling | response to stimulus                                    | GO:0050896 | P | 2826 | 8.32E-12 | 1.43E-09 |
| 7 | 2993 | F2 vs. M2 | + | Signaling and response | Signaling | response to temperature stimulus                        | GO:0009266 | P | 374  | 1.32E-07 | 7.28E-06 |
| 7 | 2994 | F2 vs. M2 | + | Signaling and response | Signaling | response to water                                       | GO:0009415 | P | 225  | 5.12E-08 | 3.25E-06 |
| 7 | 2995 | F2 vs. M2 | + | Signaling and response | Signaling | stomatal movement                                       | GO:0010118 | P | 33   | 4.38E-03 | 3.97E-02 |
| 7 | 2996 | F2 vs. M2 | + | Signaling and response | Signaling | taxis                                                   | GO:0042330 | P | 15   | 5.29E-03 | 4.56E-02 |
| 7 | 2997 | F2 vs. M2 | + | Signaling and response | Stress    | anion homeostasis                                       | GO:0055081 | P | 30   | 6.38E-04 | 9.35E-03 |
| 7 | 2998 | F2 vs. M2 | + | Signaling and response | Stress    | antioxidant activity                                    | GO:0016209 | F | 70   | 3.03E-06 | 2.82E-04 |
| 7 | 2999 | F2 vs. M2 | + | Signaling and response | Stress    | catalase activity                                       | GO:0004096 | F | 5    | 2.50E-03 | 4.96E-02 |
| 7 | 3000 | F2 vs. M2 | + | Signaling and response | Stress    | cation homeostasis                                      | GO:0055080 | P | 112  | 2.26E-05 | 5.91E-04 |
| 7 | 3001 | F2 vs. M2 | + | Signaling and response | Stress    | cell redox homeostasis                                  | GO:0045454 | P | 44   | 2.82E-03 | 2.88E-02 |
| 7 | 3002 | F2 vs. M2 | + | Signaling and response | Stress    | cellular cation homeostasis                             | GO:0030003 | P | 76   | 5.29E-04 | 8.04E-03 |
| 7 | 3003 | F2 vs. M2 | + | Signaling and response | Stress    | cellular chemical homeostasis                           | GO:0055082 | P | 95   | 1.58E-03 | 1.88E-02 |
| 7 | 3004 | F2 vs. M2 | + | Signaling and response | Stress    | cellular homeostasis                                    | GO:0019725 | P | 143  | 9.26E-05 | 1.87E-03 |
| 7 | 3005 | F2 vs. M2 | + | Signaling and response | Stress    | cellular ion homeostasis                                | GO:0006873 | P | 80   | 3.09E-04 | 5.23E-03 |
| 7 | 3006 | F2 vs. M2 | + | Signaling and response | Stress    | cellular monovalent inorganic cation homeostasis        | GO:0030004 | P | 22   | 5.31E-03 | 4.54E-02 |
| 7 | 3007 | F2 vs. M2 | + | Signaling and response | Stress    | cellular oxidant detoxification                         | GO:0098869 | P | 16   | 2.52E-04 | 4.43E-03 |
| 7 | 3008 | F2 vs. M2 | + | Signaling and response | Stress    | cellular response to decreased oxygen levels            | GO:0036294 | P | 115  | 2.73E-03 | 2.81E-02 |
| 7 | 3009 | F2 vs. M2 | + | Signaling and response | Stress    | cellular response to high light intensity               | GO:0071486 | P | 5    | 3.23E-03 | 3.18E-02 |
| 7 | 3010 | F2 vs. M2 | + | Signaling and response | Stress    | cellular response to hypoxia                            | GO:0071456 | P | 113  | 4.30E-03 | 3.91E-02 |
| 7 | 3011 | F2 vs. M2 | + | Signaling and response | Stress    | cellular response to light intensity                    | GO:0071484 | P | 7    | 2.05E-03 | 2.27E-02 |
| 7 | 3012 | F2 vs. M2 | + | Signaling and response | Stress    | cellular response to oxidative stress                   | GO:0034599 | P | 39   | 1.62E-03 | 1.92E-02 |
| 7 | 3013 | F2 vs. M2 | + | Signaling and response | Stress    | cellular response to oxygen radical                     | GO:0071450 | P | 7    | 5.06E-03 | 4.42E-02 |
| 7 | 3014 | F2 vs. M2 | + | Signaling and response | Stress    | cellular response to phosphate starvation               | GO:0016036 | P | 43   | 2.65E-04 | 4.57E-03 |
| 7 | 3015 | F2 vs. M2 | + | Signaling and response | Stress    | cellular response to superoxide                         | GO:0071451 | P | 7    | 5.06E-03 | 4.43E-02 |
| 7 | 3016 | F2 vs. M2 | + | Signaling and response | Stress    | cellular response to toxic substance                    | GO:0097237 | P | 24   | 3.68E-03 | 3.49E-02 |
| 7 | 3017 | F2 vs. M2 | + | Signaling and response | Stress    | cellular response to water deprivation                  | GO:0042631 | P | 21   | 4.93E-04 | 7.66E-03 |
| 7 | 3018 | F2 vs. M2 | + | Signaling and response | Stress    | chemical homeostasis                                    | GO:0048878 | P | 206  | 5.81E-07 | 2.70E-05 |
| 7 | 3019 | F2 vs. M2 | + | Signaling and response | Stress    | defense response                                        | GO:0006952 | P | 485  | 1.49E-06 | 6.03E-05 |
| 7 | 3020 | F2 vs. M2 | + | Signaling and response | Stress    | defense response to bacterium                           | GO:0042742 | P | 227  | 7.94E-07 | 3.56E-05 |
| 7 | 3021 | F2 vs. M2 | + | Signaling and response | Stress    | defense response to fungus, incompatible interaction    | GO:0009817 | P | 19   | 2.29E-03 | 2.47E-02 |
| 7 | 3022 | F2 vs. M2 | + | Signaling and response | Stress    | defense response to Gram-negative bacterium             | GO:0050829 | P | 13   | 2.31E-03 | 2.48E-02 |
| 7 | 3023 | F2 vs. M2 | + | Signaling and response | Stress    | defense response to other organism                      | GO:0098542 | P | 415  | 2.39E-06 | 8.87E-05 |
| 7 | 3024 | F2 vs. M2 | + | Signaling and response | Stress    | defense response, incompatible interaction              | GO:0009814 | P | 93   | 2.51E-03 | 2.66E-02 |
| 7 | 3025 | F2 vs. M2 | + | Signaling and response | Stress    | detoxification                                          | GO:0098754 | P | 47   | 5.12E-05 | 1.17E-03 |
| 7 | 3026 | F2 vs. M2 | + | Signaling and response | Stress    | divalent inorganic anion homeostasis                    | GO:0072505 | P | 13   | 2.04E-03 | 2.26E-02 |
| 7 | 3027 | F2 vs. M2 | + | Signaling and response | Stress    | flavonoid biosynthetic process                          | GO:0009813 | P | 33   | 3.01E-03 | 3.03E-02 |
| 7 | 3028 | F2 vs. M2 | + | Signaling and response | Stress    | flavonoid metabolic process                             | GO:0009812 | P | 37   | 4.88E-03 | 4.35E-02 |
| 7 | 3029 | F2 vs. M2 | + | Signaling and response | Stress    | glutathione metabolic process                           | GO:0006749 | P | 21   | 1.28E-03 | 1.58E-02 |
| 7 | 3030 | F2 vs. M2 | + | Signaling and response | Stress    | homeostatic process                                     | GO:0042592 | P | 269  | 3.44E-06 | 1.22E-04 |
| 7 | 3031 | F2 vs. M2 | + | Signaling and response | Stress    | hydrogen peroxide catabolic process                     | GO:0042744 | P | 16   | 3.20E-05 | 7.94E-04 |
| 7 | 3032 | F2 vs. M2 | + | Signaling and response | Stress    | hydrogen peroxide metabolic process                     | GO:0042743 | P | 21   | 4.42E-06 | 1.48E-04 |
| 7 | 3033 | F2 vs. M2 | + | Signaling and response | Stress    | hydrogen peroxide transmembrane transport               | GO:0080170 | P | 4    | 4.02E-03 | 3.70E-02 |
| 7 | 3034 | F2 vs. M2 | + | Signaling and response | Stress    | inorganic ion homeostasis                               | GO:0098771 | P | 122  | 1.49E-06 | 6.06E-05 |
| 7 | 3035 | F2 vs. M2 | + | Signaling and response | Stress    | interspecies interaction between organisms              | GO:0044419 | P | 591  | 5.38E-09 | 5.63E-07 |
| 7 | 3036 | F2 vs. M2 | + | Signaling and response | Stress    | ion homeostasis                                         | GO:0050801 | P | 145  | 2.02E-07 | 1.07E-05 |
| 7 | 3037 | F2 vs. M2 | + | Signaling and response | Stress    | metal ion homeostasis                                   | GO:0055065 | P | 88   | 3.80E-03 | 3.55E-02 |
| 7 | 3038 | F2 vs. M2 | + | Signaling and response | Stress    | monovalent inorganic anion homeostasis                  | GO:0055083 | P | 13   | 3.47E-03 | 3.35E-02 |
| 7 | 3039 | F2 vs. M2 | + | Signaling and response | Stress    | monovalent inorganic cation homeostasis                 | GO:0055067 | P | 38   | 8.16E-05 | 1.74E-03 |
| 7 | 3040 | F2 vs. M2 | + | Signaling and response | Stress    | oxidoreductase activity, acting on peroxide as acceptor | GO:0016684 | F | 60   | 2.41E-04 | 9.15E-03 |
| 7 | 3041 | F2 vs. M2 | + | Signaling and response | Stress    | phosphate ion homeostasis                               | GO:0055062 | P | 12   | 2.72E-03 | 2.81E-02 |
| 7 | 3042 | F2 vs. M2 | + | Signaling and response | Stress    | protein repair                                          | GO:0030091 | P | 17   | 3.62E-03 | 3.45E-02 |
| 7 | 3043 | F2 vs. M2 | + | Signaling and response | Stress    | reactive nitrogen species metabolic process             | GO:2001057 | P | 13   | 1.93E-03 | 2.17E-02 |
| 7 | 3044 | F2 vs. M2 | + | Signaling and response | Stress    | reactive oxygen species metabolic process               | GO:0072593 | P | 44   | 2.93E-08 | 2.11E-06 |
| 7 | 3045 | F2 vs. M2 | + | Signaling and response | Stress    | regulation of pH                                        | GO:0006885 | P | 26   | 8.17E-04 | 1.13E-02 |
| 7 | 3046 | F2 vs. M2 | + | Signaling and response | Stress    | regulation of stomatal movement                         | GO:0010119 | P | 59   | 5.57E-04 | 8.40E-03 |
| 7 | 3047 | F2 vs. M2 | + | Signaling and response | Stress    | removal of superoxide radicals                          | GO:0019430 | P | 7    | 5.06E-03 | 4.42E-02 |

|   |      |           |   |                        |               |                                                                     |            |   |      |          |          |
|---|------|-----------|---|------------------------|---------------|---------------------------------------------------------------------|------------|---|------|----------|----------|
| 7 | 3048 | F2 vs. M2 | + | Signaling and response | Stress        | response to abscisic acid                                           | GO:0009737 | P | 282  | 5.75E-05 | 1.27E-03 |
| 7 | 3049 | F2 vs. M2 | + | Signaling and response | Stress        | response to alcohol                                                 | GO:0097305 | P | 286  | 8.38E-05 | 1.77E-03 |
| 7 | 3050 | F2 vs. M2 | + | Signaling and response | Stress        | response to cold                                                    | GO:0009409 | P | 269  | 6.20E-10 | 8.06E-08 |
| 7 | 3051 | F2 vs. M2 | + | Signaling and response | Stress        | response to decreased oxygen levels                                 | GO:0036293 | P | 132  | 3.16E-03 | 3.14E-02 |
| 7 | 3052 | F2 vs. M2 | + | Signaling and response | Stress        | response to desiccation                                             | GO:0009269 | P | 16   | 3.47E-03 | 3.35E-02 |
| 7 | 3053 | F2 vs. M2 | + | Signaling and response | Stress        | response to fungus                                                  | GO:0009620 | P | 178  | 9.01E-05 | 1.86E-03 |
| 7 | 3054 | F2 vs. M2 | + | Signaling and response | Stress        | response to high light intensity                                    | GO:0009644 | P | 44   | 5.61E-06 | 1.84E-04 |
| 7 | 3055 | F2 vs. M2 | + | Signaling and response | Stress        | response to osmotic stress                                          | GO:0006970 | P | 293  | 8.07E-04 | 1.13E-02 |
| 7 | 3056 | F2 vs. M2 | + | Signaling and response | Stress        | response to other organism                                          | GO:0051707 | P | 577  | 6.75E-09 | 6.44E-07 |
| 7 | 3057 | F2 vs. M2 | + | Signaling and response | Stress        | response to oxidative stress                                        | GO:0006979 | P | 253  | 2.91E-08 | 2.13E-06 |
| 7 | 3058 | F2 vs. M2 | + | Signaling and response | Stress        | response to oxygen radical                                          | GO:0000305 | P | 9    | 3.62E-03 | 3.44E-02 |
| 7 | 3059 | F2 vs. M2 | + | Signaling and response | Stress        | response to ozone                                                   | GO:0010193 | P | 23   | 2.55E-03 | 2.70E-02 |
| 7 | 3060 | F2 vs. M2 | + | Signaling and response | Stress        | response to radiation                                               | GO:0009314 | P | 418  | 1.60E-06 | 6.37E-05 |
| 7 | 3061 | F2 vs. M2 | + | Signaling and response | Stress        | response to reactive oxygen species                                 | GO:0000302 | P | 95   | 8.52E-05 | 1.79E-03 |
| 7 | 3062 | F2 vs. M2 | + | Signaling and response | Stress        | response to salt stress                                             | GO:0009651 | P | 249  | 3.46E-03 | 3.35E-02 |
| 7 | 3063 | F2 vs. M2 | + | Signaling and response | Stress        | response to starvation                                              | GO:0042594 | P | 104  | 1.36E-03 | 1.66E-02 |
| 7 | 3064 | F2 vs. M2 | + | Signaling and response | Stress        | response to stress                                                  | GO:0006950 | P | 1638 | 3.46E-09 | 3.69E-07 |
| 7 | 3065 | F2 vs. M2 | + | Signaling and response | Stress        | response to superoxide                                              | GO:0000303 | P | 9    | 3.62E-03 | 3.44E-02 |
| 7 | 3066 | F2 vs. M2 | + | Signaling and response | Stress        | response to toxic substance                                         | GO:0009636 | P | 58   | 8.16E-06 | 2.52E-04 |
| 7 | 3067 | F2 vs. M2 | + | Signaling and response | Stress        | response to water deprivation                                       | GO:0009414 | P | 220  | 5.52E-08 | 3.47E-06 |
| 7 | 3068 | F2 vs. M2 | + | Signaling and response | Stress        | response to wounding                                                | GO:0009611 | P | 137  | 2.46E-08 | 1.90E-06 |
| 7 | 3069 | F2 vs. M2 | + | Signaling and response | Stress        | superoxide metabolic process                                        | GO:0006801 | P | 7    | 5.06E-03 | 4.44E-02 |
| 7 | 3070 | F2 vs. M2 | + | Signaling and response | Stress        | toxin metabolic process                                             | GO:0009404 | P | 30   | 8.65E-04 | 1.17E-02 |
| 7 | 3071 | F2 vs. M2 | + | Signaling and response | Stress        | trivalent inorganic anion homeostasis                               | GO:0072506 | P | 12   | 2.72E-03 | 2.81E-02 |
| 7 | 3072 | F2 vs. M2 | - | Development            | Cell division | alpha DNA polymerase:primase complex                                | GO:0005658 | C | 4    | 8.35E-03 | 4.56E-02 |
| 7 | 3073 | F2 vs. M2 | - | Development            | Cell division | ATP-dependent microtubule motor activity                            | GO:1990939 | F | 8    | 5.66E-04 | 1.82E-02 |
| 7 | 3074 | F2 vs. M2 | - | Development            | Cell division | base-excision repair                                                | GO:0006284 | P | 17   | 1.41E-03 | 1.71E-02 |
| 7 | 3075 | F2 vs. M2 | - | Development            | Cell division | Cajal body                                                          | GO:0015030 | C | 10   | 6.90E-03 | 3.85E-02 |
| 7 | 3076 | F2 vs. M2 | - | Development            | Cell division | cell cycle                                                          | GO:0007049 | P | 250  | 6.29E-12 | 1.16E-09 |
| 7 | 3077 | F2 vs. M2 | - | Development            | Cell division | cell cycle checkpoint                                               | GO:0000075 | P | 25   | 1.43E-04 | 2.70E-03 |
| 7 | 3078 | F2 vs. M2 | - | Development            | Cell division | cell cycle G1/S phase transition                                    | GO:0044843 | P | 7    | 1.62E-03 | 1.92E-02 |
| 7 | 3079 | F2 vs. M2 | - | Development            | Cell division | cell cycle phase transition                                         | GO:0044770 | P | 32   | 7.63E-09 | 7.02E-07 |
| 7 | 3080 | F2 vs. M2 | - | Development            | Cell division | cell cycle process                                                  | GO:0022402 | P | 229  | 1.40E-12 | 2.87E-10 |
| 7 | 3081 | F2 vs. M2 | - | Development            | Cell division | chromatin assembly                                                  | GO:0031497 | P | 34   | 4.71E-03 | 4.22E-02 |
| 7 | 3082 | F2 vs. M2 | - | Development            | Cell division | chromosome                                                          | GO:0005694 | C | 237  | 8.93E-12 | 2.49E-10 |
| 7 | 3083 | F2 vs. M2 | - | Development            | Cell division | chromosome organization involved in meiotic cell cycle              | GO:0070192 | P | 25   | 8.19E-04 | 1.13E-02 |
| 7 | 3084 | F2 vs. M2 | - | Development            | Cell division | chromosome segregation                                              | GO:0007059 | P | 53   | 2.74E-05 | 6.99E-04 |
| 7 | 3085 | F2 vs. M2 | - | Development            | Cell division | chromosome, centromeric region                                      | GO:0000775 | C | 21   | 1.47E-04 | 1.34E-03 |
| 7 | 3086 | F2 vs. M2 | - | Development            | Cell division | condensed chromosome                                                | GO:0000793 | C | 32   | 5.62E-07 | 7.63E-06 |
| 7 | 3087 | F2 vs. M2 | - | Development            | Cell division | condensed chromosome kinetochore                                    | GO:0000777 | C | 5    | 3.03E-03 | 2.00E-02 |
| 7 | 3088 | F2 vs. M2 | - | Development            | Cell division | condensed chromosome, centromeric region                            | GO:0000779 | C | 11   | 6.54E-04 | 5.14E-03 |
| 7 | 3089 | F2 vs. M2 | - | Development            | Cell division | condensed nuclear chromosome                                        | GO:0000794 | C | 21   | 8.27E-07 | 1.11E-05 |
| 7 | 3090 | F2 vs. M2 | - | Development            | Cell division | condensed nuclear chromosome kinetochore                            | GO:0000778 | C | 3    | 8.56E-03 | 4.65E-02 |
| 7 | 3091 | F2 vs. M2 | - | Development            | Cell division | condensed nuclear chromosome, centromeric region                    | GO:0000780 | C | 8    | 3.32E-03 | 2.14E-02 |
| 7 | 3092 | F2 vs. M2 | - | Development            | Cell division | cyclin-dependent protein kinase holoenzyme complex                  | GO:0000307 | C | 34   | 5.89E-08 | 1.04E-06 |
| 7 | 3093 | F2 vs. M2 | - | Development            | Cell division | cyclin-dependent protein serine/threonine kinase regulator activity | GO:0016538 | F | 30   | 7.68E-06 | 6.29E-04 |
| 7 | 3094 | F2 vs. M2 | - | Development            | Cell division | cytokinesis by cell plate formation                                 | GO:0000911 | P | 38   | 3.10E-03 | 3.10E-02 |
| 7 | 3095 | F2 vs. M2 | - | Development            | Cell division | DNA biosynthetic process                                            | GO:0071897 | P | 13   | 4.62E-06 | 1.52E-04 |
| 7 | 3096 | F2 vs. M2 | - | Development            | Cell division | DNA polymerase complex                                              | GO:0042575 | C | 11   | 4.18E-04 | 3.51E-03 |
| 7 | 3097 | F2 vs. M2 | - | Development            | Cell division | DNA recombination                                                   | GO:0006310 | P | 69   | 1.43E-05 | 3.90E-04 |
| 7 | 3098 | F2 vs. M2 | - | Development            | Cell division | DNA repair                                                          | GO:0006281 | P | 159  | 1.40E-11 | 2.34E-09 |
| 7 | 3099 | F2 vs. M2 | - | Development            | Cell division | DNA repair complex                                                  | GO:1990391 | C | 12   | 8.28E-03 | 4.55E-02 |
| 7 | 3100 | F2 vs. M2 | - | Development            | Cell division | DNA replication                                                     | GO:0006260 | P | 71   | 3.05E-10 | 4.17E-08 |
| 7 | 3101 | F2 vs. M2 | - | Development            | Cell division | DNA replication factor A complex                                    | GO:0005662 | C | 5    | 4.65E-04 | 3.81E-03 |
| 7 | 3102 | F2 vs. M2 | - | Development            | Cell division | DNA replication initiation                                          | GO:0006270 | P | 14   | 8.75E-06 | 2.65E-04 |
| 7 | 3103 | F2 vs. M2 | - | Development            | Cell division | DNA replication origin binding                                      | GO:0003688 | F | 12   | 2.62E-05 | 1.72E-03 |
| 7 | 3104 | F2 vs. M2 | - | Development            | Cell division | DNA strand elongation                                               | GO:0022616 | P | 11   | 3.18E-05 | 7.93E-04 |
| 7 | 3105 | F2 vs. M2 | - | Development            | Cell division | DNA strand elongation involved in DNA replication                   | GO:0006271 | P | 11   | 3.18E-05 | 7.96E-04 |
| 7 | 3106 | F2 vs. M2 | - | Development            | Cell division | DNA unwinding involved in DNA replication                           | GO:0006268 | P | 8    | 9.57E-04 | 1.27E-02 |
| 7 | 3107 | F2 vs. M2 | - | Development            | Cell division | DNA-dependent DNA replication                                       | GO:0006261 | P | 62   | 1.35E-10 | 2.12E-08 |
| 7 | 3108 | F2 vs. M2 | - | Development            | Cell division | double-strand break repair                                          | GO:0006302 | P | 60   | 1.62E-06 | 6.35E-05 |
| 7 | 3109 | F2 vs. M2 | - | Development            | Cell division | double-strand break repair via break-induced replication            | GO:0000727 | P | 7    | 3.88E-03 | 3.60E-02 |
| 7 | 3110 | F2 vs. M2 | - | Development            | Cell division | double-strand break repair via homologous recombination             | GO:0000724 | P | 40   | 4.21E-04 | 6.87E-03 |



|   |      |           |   |             |               |                                                                    |            |   |      |          |          |
|---|------|-----------|---|-------------|---------------|--------------------------------------------------------------------|------------|---|------|----------|----------|
| 7 | 3111 | F2 vs. M2 | - | Development | Cell division | endonuclease activity                                              | GO:0004519 | F | 52   | 5.19E-06 | 4.52E-04 |
| 7 | 3112 | F2 vs. M2 | - | Development | Cell division | G1/S transition of mitotic cell cycle                              | GO:0000082 | P | 6    | 1.71E-03 | 1.99E-02 |
| 7 | 3113 | F2 vs. M2 | - | Development | Cell division | kinetochore                                                        | GO:0000776 | C | 12   | 4.91E-04 | 3.95E-03 |
| 7 | 3114 | F2 vs. M2 | - | Development | Cell division | MCM complex                                                        | GO:0042555 | C | 6    | 9.02E-03 | 4.84E-02 |
| 7 | 3115 | F2 vs. M2 | - | Development | Cell division | meiotic cell cycle                                                 | GO:0051321 | P | 82   | 6.36E-05 | 1.38E-03 |
| 7 | 3116 | F2 vs. M2 | - | Development | Cell division | meiotic cell cycle process                                         | GO:1903046 | P | 74   | 1.39E-03 | 1.69E-02 |
| 7 | 3117 | F2 vs. M2 | - | Development | Cell division | meiotic chromosome segregation                                     | GO:0045132 | P | 26   | 5.71E-03 | 4.81E-02 |
| 7 | 3118 | F2 vs. M2 | - | Development | Cell division | microtubule cytoskeleton organization involved in mitosis          | GO:1902850 | P | 14   | 2.63E-03 | 2.76E-02 |
| 7 | 3119 | F2 vs. M2 | - | Development | Cell division | mismatch repair                                                    | GO:0006298 | P | 11   | 4.49E-04 | 7.13E-03 |
| 7 | 3120 | F2 vs. M2 | - | Development | Cell division | mitotic cell cycle                                                 | GO:0000278 | P | 141  | 2.35E-08 | 1.87E-06 |
| 7 | 3121 | F2 vs. M2 | - | Development | Cell division | mitotic cell cycle checkpoint                                      | GO:0007093 | P | 18   | 2.23E-03 | 2.42E-02 |
| 7 | 3122 | F2 vs. M2 | - | Development | Cell division | mitotic cell cycle phase transition                                | GO:0044772 | P | 31   | 8.87E-09 | 7.89E-07 |
| 7 | 3123 | F2 vs. M2 | - | Development | Cell division | mitotic cell cycle process                                         | GO:1903047 | P | 116  | 6.42E-10 | 8.16E-08 |
| 7 | 3124 | F2 vs. M2 | - | Development | Cell division | mitotic checkpoint complex                                         | GO:0033597 | C | 4    | 4.84E-03 | 2.93E-02 |
| 7 | 3125 | F2 vs. M2 | - | Development | Cell division | mitotic DNA replication                                            | GO:1902969 | P | 6    | 3.44E-04 | 5.74E-03 |
| 7 | 3126 | F2 vs. M2 | - | Development | Cell division | mitotic nuclear division                                           | GO:0140014 | P | 34   | 1.78E-03 | 2.04E-02 |
| 7 | 3127 | F2 vs. M2 | - | Development | Cell division | mitotic spindle assembly checkpoint                                | GO:0007094 | P | 8    | 9.85E-04 | 1.31E-02 |
| 7 | 3128 | F2 vs. M2 | - | Development | Cell division | mitotic spindle checkpoint                                         | GO:0071174 | P | 8    | 9.85E-04 | 1.29E-02 |
| 7 | 3129 | F2 vs. M2 | - | Development | Cell division | negative regulation of cell cycle                                  | GO:0045786 | P | 44   | 3.42E-05 | 8.38E-04 |
| 7 | 3130 | F2 vs. M2 | - | Development | Cell division | negative regulation of cell cycle phase transition                 | GO:1901988 | P | 14   | 8.19E-04 | 1.13E-02 |
| 7 | 3131 | F2 vs. M2 | - | Development | Cell division | negative regulation of cell cycle process                          | GO:0010948 | P | 26   | 4.23E-04 | 6.85E-03 |
| 7 | 3132 | F2 vs. M2 | - | Development | Cell division | negative regulation of chromosome organization                     | GO:2001251 | P | 10   | 1.82E-04 | 3.29E-03 |
| 7 | 3133 | F2 vs. M2 | - | Development | Cell division | negative regulation of chromosome segregation                      | GO:0051985 | P | 8    | 9.85E-04 | 1.30E-02 |
| 7 | 3134 | F2 vs. M2 | - | Development | Cell division | negative regulation of chromosome separation                       | GO:1905819 | P | 8    | 9.85E-04 | 1.27E-02 |
| 7 | 3135 | F2 vs. M2 | - | Development | Cell division | negative regulation of metaphase/anaphase transition of cell cycle | GO:1902100 | P | 8    | 9.85E-04 | 1.28E-02 |
| 7 | 3136 | F2 vs. M2 | - | Development | Cell division | negative regulation of mitotic cell cycle                          | GO:0045930 | P | 24   | 1.04E-03 | 1.32E-02 |
| 7 | 3137 | F2 vs. M2 | - | Development | Cell division | negative regulation of mitotic cell cycle phase transition         | GO:1901991 | P | 14   | 8.19E-04 | 1.13E-02 |
| 7 | 3138 | F2 vs. M2 | - | Development | Cell division | negative regulation of mitotic metaphase/anaphase transition       | GO:0045841 | P | 8    | 9.85E-04 | 1.28E-02 |
| 7 | 3139 | F2 vs. M2 | - | Development | Cell division | negative regulation of mitotic nuclear division                    | GO:0045839 | P | 12   | 5.78E-03 | 4.86E-02 |
| 7 | 3140 | F2 vs. M2 | - | Development | Cell division | negative regulation of mitotic sister chromatid segregation        | GO:0033048 | P | 8    | 9.85E-04 | 1.30E-02 |
| 7 | 3141 | F2 vs. M2 | - | Development | Cell division | negative regulation of mitotic sister chromatid separation         | GO:2000816 | P | 8    | 9.85E-04 | 1.30E-02 |
| 7 | 3142 | F2 vs. M2 | - | Development | Cell division | negative regulation of nuclear division                            | GO:0051784 | P | 16   | 5.78E-04 | 8.64E-03 |
| 7 | 3143 | F2 vs. M2 | - | Development | Cell division | negative regulation of reproductive process                        | GO:2000242 | P | 33   | 6.28E-04 | 9.23E-03 |
| 7 | 3144 | F2 vs. M2 | - | Development | Cell division | negative regulation of sister chromatid segregation                | GO:0033046 | P | 8    | 9.85E-04 | 1.29E-02 |
| 7 | 3145 | F2 vs. M2 | - | Development | Cell division | nuclear chromosome segregation                                     | GO:0098813 | P | 47   | 1.60E-04 | 2.94E-03 |
| 7 | 3146 | F2 vs. M2 | - | Development | Cell division | nuclear division                                                   | GO:0000280 | P | 77   | 1.01E-05 | 2.95E-04 |
| 7 | 3147 | F2 vs. M2 | - | Development | Cell division | nuclear DNA replication                                            | GO:0033260 | P | 11   | 8.57E-04 | 1.16E-02 |
| 7 | 3148 | F2 vs. M2 | - | Development | Cell division | nuclear origin of replication recognition complex                  | GO:0005664 | C | 4    | 6.03E-03 | 3.43E-02 |
| 7 | 3149 | F2 vs. M2 | - | Development | Cell division | nuclear replication fork                                           | GO:0043596 | C | 18   | 5.38E-07 | 7.41E-06 |
| 7 | 3150 | F2 vs. M2 | - | Development | Cell division | nuclease activity                                                  | GO:0004518 | F | 98   | 8.79E-07 | 1.03E-04 |
| 7 | 3151 | F2 vs. M2 | - | Development | Cell division | nucleic acid metabolic process                                     | GO:0090304 | P | 854  | 0.00E+00 | 0.00E+00 |
| 7 | 3152 | F2 vs. M2 | - | Development | Cell division | nucleobase-containing compound metabolic process                   | GO:0006139 | P | 1089 | 7.33E-15 | 2.61E-12 |
| 7 | 3153 | F2 vs. M2 | - | Development | Cell division | nucleotide-excision repair                                         | GO:0006289 | P | 29   | 1.95E-04 | 3.49E-03 |
| 7 | 3154 | F2 vs. M2 | - | Development | Cell division | origin recognition complex                                         | GO:0000808 | C | 4    | 6.03E-03 | 3.41E-02 |
| 7 | 3155 | F2 vs. M2 | - | Development | Cell division | recombinational repair                                             | GO:0000725 | P | 44   | 4.12E-04 | 6.74E-03 |
| 7 | 3156 | F2 vs. M2 | - | Development | Cell division | regulation of cell cycle                                           | GO:0051726 | P | 139  | 2.08E-11 | 3.36E-09 |
| 7 | 3157 | F2 vs. M2 | - | Development | Cell division | regulation of cell cycle G2/M phase transition                     | GO:1902749 | P | 16   | 6.60E-04 | 9.65E-03 |
| 7 | 3158 | F2 vs. M2 | - | Development | Cell division | regulation of cell cycle phase transition                          | GO:1901987 | P | 31   | 5.10E-08 | 3.28E-06 |
| 7 | 3159 | F2 vs. M2 | - | Development | Cell division | regulation of cell cycle process                                   | GO:0010564 | P | 71   | 1.11E-08 | 9.37E-07 |
| 7 | 3160 | F2 vs. M2 | - | Development | Cell division | regulation of cell division                                        | GO:0051302 | P | 44   | 3.87E-06 | 1.36E-04 |
| 7 | 3161 | F2 vs. M2 | - | Development | Cell division | regulation of chromosome organization                              | GO:0033044 | P | 36   | 9.76E-06 | 2.88E-04 |
| 7 | 3162 | F2 vs. M2 | - | Development | Cell division | regulation of chromosome segregation                               | GO:0051983 | P | 15   | 8.86E-05 | 1.85E-03 |
| 7 | 3163 | F2 vs. M2 | - | Development | Cell division | regulation of chromosome separation                                | GO:1905818 | P | 14   | 4.47E-05 | 1.03E-03 |
| 7 | 3164 | F2 vs. M2 | - | Development | Cell division | regulation of cyclin-dependent protein kinase activity             | GO:1904029 | P | 35   | 4.42E-04 | 7.04E-03 |
| 7 | 3165 | F2 vs. M2 | - | Development | Cell division | regulation of DNA metabolic process                                | GO:0051052 | P | 41   | 1.05E-03 | 1.33E-02 |
| 7 | 3166 | F2 vs. M2 | - | Development | Cell division | regulation of DNA replication                                      | GO:0006275 | P | 32   | 2.52E-03 | 2.67E-02 |
| 7 | 3167 | F2 vs. M2 | - | Development | Cell division | regulation of G2/M transition of mitotic cell cycle                | GO:0010389 | P | 15   | 5.00E-04 | 7.71E-03 |
| 7 | 3168 | F2 vs. M2 | - | Development | Cell division | regulation of metaphase/anaphase transition of cell cycle          | GO:1902099 | P | 14   | 4.47E-05 | 1.04E-03 |
| 7 | 3169 | F2 vs. M2 | - | Development | Cell division | regulation of mitotic cell cycle                                   | GO:0007346 | P | 46   | 9.38E-08 | 5.27E-06 |
| 7 | 3170 | F2 vs. M2 | - | Development | Cell division | regulation of mitotic cell cycle phase transition                  | GO:1901990 | P | 30   | 3.54E-08 | 2.39E-06 |
| 7 | 3171 | F2 vs. M2 | - | Development | Cell division | regulation of mitotic metaphase/anaphase transition                | GO:0030071 | P | 14   | 4.47E-05 | 1.04E-03 |
| 7 | 3172 | F2 vs. M2 | - | Development | Cell division | regulation of mitotic nuclear division                             | GO:0007088 | P | 16   | 7.41E-04 | 1.05E-02 |
| 7 | 3173 | F2 vs. M2 | - | Development | Cell division | regulation of mitotic sister chromatid segregation                 | GO:0033047 | P | 8    | 9.85E-04 | 1.30E-02 |

|   |      |           |   |             |               |                                                             |            |   |      |          |          |
|---|------|-----------|---|-------------|---------------|-------------------------------------------------------------|------------|---|------|----------|----------|
| 7 | 3174 | F2 vs. M2 | - | Development | Cell division | regulation of mitotic sister chromatid separation           | GO:0010965 | P | 14   | 4.47E-05 | 1.05E-03 |
| 7 | 3175 | F2 vs. M2 | - | Development | Cell division | regulation of nuclear division                              | GO:0051783 | P | 27   | 4.18E-05 | 9.95E-04 |
| 7 | 3176 | F2 vs. M2 | - | Development | Cell division | regulation of sister chromatid segregation                  | GO:0033045 | P | 15   | 8.86E-05 | 1.84E-03 |
| 7 | 3177 | F2 vs. M2 | - | Development | Cell division | replication fork                                            | GO:0005657 | C | 26   | 1.16E-07 | 1.94E-06 |
| 7 | 3178 | F2 vs. M2 | - | Development | Cell division | replisome                                                   | GO:0030894 | C | 14   | 1.36E-07 | 2.19E-06 |
| 7 | 3179 | F2 vs. M2 | - | Development | Cell division | RNA metabolic process                                       | GO:0016070 | P | 657  | 0.00E+00 | 0.00E+00 |
| 7 | 3180 | F2 vs. M2 | - | Development | Cell division | SCF ubiquitin ligase complex                                | GO:0019005 | C | 39   | 6.35E-04 | 5.03E-03 |
| 7 | 3181 | F2 vs. M2 | - | Development | Cell division | single-stranded DNA binding                                 | GO:0003697 | F | 40   | 7.71E-07 | 9.46E-05 |
| 7 | 3182 | F2 vs. M2 | - | Development | Cell division | sister chromatid cohesion                                   | GO:0007062 | P | 20   | 5.47E-03 | 4.65E-02 |
| 7 | 3183 | F2 vs. M2 | - | Development | Cell division | sister chromatid segregation                                | GO:0000819 | P | 30   | 1.64E-03 | 1.93E-02 |
| 7 | 3184 | F2 vs. M2 | - | Development | Cell division | spindle                                                     | GO:0005819 | C | 44   | 5.10E-07 | 7.23E-06 |
| 7 | 3185 | F2 vs. M2 | - | Development | Cell division | spindle assembly                                            | GO:0051225 | P | 23   | 5.40E-04 | 8.18E-03 |
| 7 | 3186 | F2 vs. M2 | - | Development | Cell division | spindle assembly checkpoint                                 | GO:0071173 | P | 8    | 9.85E-04 | 1.29E-02 |
| 7 | 3187 | F2 vs. M2 | - | Development | Cell division | spindle checkpoint                                          | GO:0031577 | P | 8    | 9.85E-04 | 1.28E-02 |
| 7 | 3188 | F2 vs. M2 | - | Development | Cell division | spindle microtubule                                         | GO:0005876 | C | 12   | 7.62E-05 | 7.24E-04 |
| 7 | 3189 | F2 vs. M2 | - | Development | Cell division | spindle organization                                        | GO:0007051 | P | 31   | 4.36E-04 | 7.01E-03 |
| 7 | 3190 | F2 vs. M2 | - | Development | Cell division | telomere maintenance                                        | GO:0000723 | P | 13   | 4.44E-03 | 4.02E-02 |
| 7 | 3191 | F2 vs. M2 | - | Development | Cell division | telomere maintenance via telomerase                         | GO:0007004 | P | 4    | 1.89E-03 | 2.14E-02 |
| 7 | 3192 | F2 vs. M2 | - | Development | Cell division | telomere maintenance via telomere lengthening               | GO:0010833 | P | 4    | 1.89E-03 | 2.14E-02 |
| 7 | 3193 | F2 vs. M2 | - | Development | Cell division | telomere organization                                       | GO:0032200 | P | 13   | 4.44E-03 | 4.01E-02 |
| 7 | 3194 | F2 vs. M2 | - | Development | Development   | anatomical structure homeostasis                            | GO:0060249 | P | 14   | 2.75E-03 | 2.82E-02 |
| 7 | 3195 | F2 vs. M2 | - | Development | Development   | anther wall tapetum development                             | GO:0048658 | P | 6    | 1.38E-04 | 2.61E-03 |
| 7 | 3196 | F2 vs. M2 | - | Development | Development   | cellular component assembly                                 | GO:0022607 | P | 450  | 3.33E-03 | 3.26E-02 |
| 7 | 3197 | F2 vs. M2 | - | Development | Development   | chromatin                                                   | GO:0000785 | C | 146  | 7.47E-04 | 5.77E-03 |
| 7 | 3198 | F2 vs. M2 | - | Development | Development   | chromatin assembly or disassembly                           | GO:0006333 | P | 40   | 3.53E-03 | 3.38E-02 |
| 7 | 3199 | F2 vs. M2 | - | Development | Development   | chromatin organization                                      | GO:0006325 | P | 168  | 1.33E-07 | 7.23E-06 |
| 7 | 3200 | F2 vs. M2 | - | Development | Development   | chromosomal region                                          | GO:0098687 | C | 31   | 9.53E-06 | 1.05E-04 |
| 7 | 3201 | F2 vs. M2 | - | Development | Development   | chromosome organization                                     | GO:0051276 | P | 249  | 1.12E-13 | 3.31E-11 |
| 7 | 3202 | F2 vs. M2 | - | Development | Development   | cortical cytoskeleton organization                          | GO:0030865 | P | 40   | 1.75E-03 | 2.01E-02 |
| 7 | 3203 | F2 vs. M2 | - | Development | Development   | intracellular non-membrane-bounded organelle                | GO:0043232 | C | 948  | 0.00E+00 | 0.00E+00 |
| 7 | 3204 | F2 vs. M2 | - | Development | Development   | intracellular organelle lumen                               | GO:0070013 | C | 719  | 0.00E+00 | 0.00E+00 |
| 7 | 3205 | F2 vs. M2 | - | Development | Development   | kinetochore microtubule                                     | GO:0005828 | C | 3    | 4.49E-03 | 2.73E-02 |
| 7 | 3206 | F2 vs. M2 | - | Development | Development   | membrane-enclosed lumen                                     | GO:0031974 | C | 719  | 0.00E+00 | 0.00E+00 |
| 7 | 3207 | F2 vs. M2 | - | Development | Development   | microtubule                                                 | GO:0005874 | C | 75   | 9.43E-04 | 7.23E-03 |
| 7 | 3208 | F2 vs. M2 | - | Development | Development   | microtubule associated complex                              | GO:0005875 | C | 37   | 6.66E-05 | 6.53E-04 |
| 7 | 3209 | F2 vs. M2 | - | Development | Development   | microtubule cytoskeleton                                    | GO:0015630 | C | 117  | 1.34E-05 | 1.47E-04 |
| 7 | 3210 | F2 vs. M2 | - | Development | Development   | microtubule cytoskeleton organization                       | GO:0000226 | P | 99   | 1.74E-03 | 2.01E-02 |
| 7 | 3211 | F2 vs. M2 | - | Development | Development   | microtubule-based process                                   | GO:0007017 | P | 127  | 9.23E-05 | 1.87E-03 |
| 7 | 3212 | F2 vs. M2 | - | Development | Development   | non-membrane-bounded organelle                              | GO:0043228 | C | 948  | 0.00E+00 | 0.00E+00 |
| 7 | 3213 | F2 vs. M2 | - | Development | Development   | nuclear body                                                | GO:0016604 | C | 67   | 1.28E-03 | 9.08E-03 |
| 7 | 3214 | F2 vs. M2 | - | Development | Development   | nuclear chromatin                                           | GO:0000790 | C | 115  | 3.80E-03 | 2.39E-02 |
| 7 | 3215 | F2 vs. M2 | - | Development | Development   | nuclear chromosome                                          | GO:0000228 | C | 162  | 5.68E-10 | 1.35E-08 |
| 7 | 3216 | F2 vs. M2 | - | Development | Development   | nuclear lumen                                               | GO:0031981 | C | 626  | 0.00E+00 | 0.00E+00 |
| 7 | 3217 | F2 vs. M2 | - | Development | Development   | nuclear pore                                                | GO:0005643 | C | 22   | 2.41E-03 | 1.63E-02 |
| 7 | 3218 | F2 vs. M2 | - | Development | Development   | nuclear replisome                                           | GO:0043601 | C | 14   | 1.36E-07 | 2.22E-06 |
| 7 | 3219 | F2 vs. M2 | - | Development | Development   | nucleic acid phosphodiester bond hydrolysis                 | GO:0090305 | P | 42   | 1.07E-03 | 1.35E-02 |
| 7 | 3220 | F2 vs. M2 | - | Development | Development   | nucleoplasm                                                 | GO:0005654 | C | 230  | 9.27E-10 | 2.15E-08 |
| 7 | 3221 | F2 vs. M2 | - | Development | Development   | nucleus                                                     | GO:0005634 | C | 4325 | 5.03E-13 | 1.54E-11 |
| 7 | 3222 | F2 vs. M2 | - | Development | Development   | organelle assembly                                          | GO:0070925 | P | 112  | 2.65E-05 | 6.87E-04 |
| 7 | 3223 | F2 vs. M2 | - | Development | Development   | organelle fission                                           | GO:0048285 | P | 102  | 4.28E-06 | 1.44E-04 |
| 7 | 3224 | F2 vs. M2 | - | Development | Development   | organelle lumen                                             | GO:0043233 | C | 719  | 0.00E+00 | 0.00E+00 |
| 7 | 3225 | F2 vs. M2 | - | Development | Development   | organelle organization                                      | GO:0006996 | P | 895  | 5.74E-05 | 1.28E-03 |
| 7 | 3226 | F2 vs. M2 | - | Development | Development   | phragmoplast                                                | GO:0009524 | C | 36   | 1.24E-03 | 8.94E-03 |
| 7 | 3227 | F2 vs. M2 | - | Development | Development   | reproductive shoot system development                       | GO:0090567 | P | 198  | 5.69E-03 | 4.80E-02 |
| 7 | 3228 | F2 vs. M2 | - | Development | Development   | shoot system development                                    | GO:0048367 | P | 376  | 3.45E-03 | 3.35E-02 |
| 7 | 3229 | F2 vs. M2 | - | Development | Development   | stomatal complex development                                | GO:0010374 | P | 27   | 5.91E-03 | 4.94E-02 |
| 7 | 3230 | F2 vs. M2 | - | Development | Development   | structural constituent of nuclear pore                      | GO:0017056 | F | 11   | 7.44E-04 | 2.14E-02 |
| 7 | 3231 | F2 vs. M2 | - | Development | Development   | structural molecule activity                                | GO:0005198 | F | 267  | 2.14E-05 | 1.48E-03 |
| 7 | 3232 | F2 vs. M2 | - | Metabolism  | Bioenergetics | ATP-dependent microtubule motor activity, plus-end-directed | GO:0008574 | F | 7    | 2.04E-03 | 4.33E-02 |
| 7 | 3233 | F2 vs. M2 | - | Metabolism  | Bioenergetics | DNA-dependent ATPase activity                               | GO:0008094 | F | 58   | 3.06E-04 | 1.09E-02 |
| 7 | 3234 | F2 vs. M2 | - | Metabolism  | Bioenergetics | positive regulation of ATPase activity                      | GO:0032781 | P | 10   | 3.20E-03 | 3.17E-02 |
| 7 | 3235 | F2 vs. M2 | - | Metabolism  | Bioenergetics | regulation of ATPase activity                               | GO:0043462 | P | 12   | 3.18E-03 | 3.15E-02 |
| 7 | 3236 | F2 vs. M2 | - | Metabolism  | Catabolism    | cellular protein catabolic process                          | GO:0044257 | P | 288  | 5.48E-03 | 4.66E-02 |
| 7 | 3237 | F2 vs. M2 | - | Metabolism  | Catabolism    | Cul4-RING E3 ubiquitin ligase complex                       | GO:0080008 | C | 80   | 2.53E-05 | 2.70E-04 |



|   |      |           |   |            |            |                                                                                   |            |   |      |          |          |
|---|------|-----------|---|------------|------------|-----------------------------------------------------------------------------------|------------|---|------|----------|----------|
| 7 | 3238 | F2 vs. M2 | - | Metabolism | Catabolism | cullin-RING ubiquitin ligase complex                                              | GO:0031461 | C | 133  | 3.36E-09 | 7.10E-08 |
| 7 | 3239 | F2 vs. M2 | - | Metabolism | Catabolism | endoribonuclease activity                                                         | GO:0004521 | F | 40   | 2.23E-04 | 8.72E-03 |
| 7 | 3240 | F2 vs. M2 | - | Metabolism | Catabolism | exonuclease activity                                                              | GO:0004527 | F | 45   | 1.94E-03 | 4.30E-02 |
| 7 | 3241 | F2 vs. M2 | - | Metabolism | Catabolism | modification-dependent macromolecule catabolic process                            | GO:0043632 | P | 255  | 7.88E-06 | 2.46E-04 |
| 7 | 3242 | F2 vs. M2 | - | Metabolism | Catabolism | modification-dependent protein catabolic process                                  | GO:0019941 | P | 249  | 1.64E-05 | 4.43E-04 |
| 7 | 3243 | F2 vs. M2 | - | Metabolism | Catabolism | peptidase complex                                                                 | GO:1905368 | C | 61   | 1.14E-03 | 8.49E-03 |
| 7 | 3244 | F2 vs. M2 | - | Metabolism | Catabolism | positive regulation of catabolic process                                          | GO:0009896 | P | 38   | 1.77E-03 | 2.04E-02 |
| 7 | 3245 | F2 vs. M2 | - | Metabolism | Catabolism | positive regulation of cellular catabolic process                                 | GO:0031331 | P | 37   | 1.13E-03 | 1.41E-02 |
| 7 | 3246 | F2 vs. M2 | - | Metabolism | Catabolism | positive regulation of cellular protein catabolic process                         | GO:1903364 | P | 21   | 2.87E-03 | 2.91E-02 |
| 7 | 3247 | F2 vs. M2 | - | Metabolism | Catabolism | positive regulation of proteasomal protein catabolic process                      | GO:1901800 | P | 19   | 2.10E-03 | 2.30E-02 |
|   |      |           |   |            |            | positive regulation of proteasomal ubiquitin-dependent protein catabolic process  | GO:0032436 | P | 19   | 2.10E-03 | 2.31E-02 |
| 7 | 3248 | F2 vs. M2 | - | Metabolism | Catabolism | positive regulation of protein catabolic process                                  | GO:0045732 | P | 22   | 5.13E-03 | 4.45E-02 |
| 7 | 3249 | F2 vs. M2 | - | Metabolism | Catabolism | positive regulation of proteolysis                                                | GO:0045862 | P | 22   | 2.08E-03 | 2.29E-02 |
|   |      |           |   |            |            | positive regulation of proteolysis involved in cellular protein catabolic process | GO:1903052 | P | 21   | 2.87E-03 | 2.91E-02 |
|   |      |           |   |            |            | positive regulation of ubiquitin-dependent protein catabolic process              | GO:2000060 | P | 20   | 1.64E-03 | 1.93E-02 |
| 7 | 3252 | F2 vs. M2 | - | Metabolism | Catabolism | proteasomal protein catabolic process                                             | GO:0010498 | P | 132  | 8.02E-04 | 1.12E-02 |
| 7 | 3253 | F2 vs. M2 | - | Metabolism | Catabolism | proteasome-mediated ubiquitin-dependent protein catabolic process                 | GO:0043161 | P | 124  | 4.34E-04 | 6.99E-03 |
| 7 | 3254 | F2 vs. M2 | - | Metabolism | Catabolism | protein-containing complex                                                        | GO:0032991 | C | 1615 | 0.00E+00 | 0.00E+00 |
| 7 | 3255 | F2 vs. M2 | - | Metabolism | Catabolism | proteolysis involved in cellular protein catabolic process                        | GO:0051603 | P | 282  | 1.71E-03 | 1.98E-02 |
| 7 | 3256 | F2 vs. M2 | - | Metabolism | Catabolism | regulation of catabolic process                                                   | GO:0009894 | P | 66   | 3.90E-03 | 3.61E-02 |
| 7 | 3257 | F2 vs. M2 | - | Metabolism | Catabolism | regulation of cellular protein catabolic process                                  | GO:1903362 | P | 24   | 6.91E-04 | 9.97E-03 |
| 7 | 3258 | F2 vs. M2 | - | Metabolism | Catabolism | regulation of proteasomal protein catabolic process                               | GO:0061136 | P | 22   | 4.84E-04 | 7.57E-03 |
| 7 | 3259 | F2 vs. M2 | - | Metabolism | Catabolism | regulation of proteasomal ubiquitin-dependent protein catabolic process           | GO:0032434 | P | 21   | 9.47E-04 | 1.27E-02 |
| 7 | 3260 | F2 vs. M2 | - | Metabolism | Catabolism | regulation of protein catabolic process                                           | GO:0042176 | P | 32   | 3.63E-04 | 6.01E-03 |
| 7 | 3261 | F2 vs. M2 | - | Metabolism | Catabolism | regulation of proteolysis                                                         | GO:0030162 | P | 30   | 2.97E-03 | 2.99E-02 |
|   |      |           |   |            |            | regulation of proteolysis involved in cellular protein catabolic process          | GO:1903050 | P | 24   | 6.91E-04 | 9.94E-03 |
| 7 | 3263 | F2 vs. M2 | - | Metabolism | Catabolism | regulation of ubiquitin-dependent protein catabolic process                       | GO:2000058 | P | 22   | 7.39E-04 | 1.05E-02 |
| 7 | 3264 | F2 vs. M2 | - | Metabolism | Catabolism | ubiquitin ligase complex                                                          | GO:0000151 | C | 167  | 3.16E-10 | 7.70E-09 |
| 7 | 3265 | F2 vs. M2 | - | Metabolism | Catabolism | ubiquitin-dependent protein catabolic process                                     | GO:0006511 | P | 244  | 2.09E-05 | 5.51E-04 |
| 7 | 3266 | F2 vs. M2 | - | Metabolism | Catabolism | amide biosynthetic process                                                        | GO:0043604 | P | 351  | 4.82E-04 | 7.57E-03 |
| 7 | 3267 | F2 vs. M2 | - | Metabolism | Metabolism | carboxy-terminal domain protein kinase complex                                    | GO:0032806 | C | 8    | 5.82E-03 | 3.33E-02 |
| 7 | 3268 | F2 vs. M2 | - | Metabolism | Metabolism | catalytic activity, acting on DNA                                                 | GO:0140097 | F | 93   | 4.78E-06 | 4.30E-04 |
| 7 | 3269 | F2 vs. M2 | - | Metabolism | Metabolism | catalytic complex                                                                 | GO:1902494 | C | 638  | 5.55E-16 | 2.11E-14 |
| 7 | 3270 | F2 vs. M2 | - | Metabolism | Metabolism | cellular aromatic compound metabolic process                                      | GO:0006725 | P | 1319 | 2.26E-06 | 8.61E-05 |
| 7 | 3271 | F2 vs. M2 | - | Metabolism | Metabolism | cellular macromolecule biosynthetic process                                       | GO:0034645 | P | 715  | 2.36E-08 | 1.85E-06 |
| 7 | 3272 | F2 vs. M2 | - | Metabolism | Metabolism | cellular macromolecule metabolic process                                          | GO:0044260 | P | 2173 | 1.90E-10 | 2.74E-08 |
| 7 | 3273 | F2 vs. M2 | - | Metabolism | Metabolism | cellular nitrogen compound metabolic process                                      | GO:0034641 | P | 1541 | 7.83E-12 | 1.39E-09 |
| 7 | 3274 | F2 vs. M2 | - | Metabolism | Metabolism | cellular protein metabolic process                                                | GO:0044267 | P | 1636 | 8.25E-08 | 4.79E-06 |
| 7 | 3275 | F2 vs. M2 | - | Metabolism | Metabolism | cellular protein modification process                                             | GO:0006464 | P | 1146 | 2.68E-05 | 6.88E-04 |
| 7 | 3276 | F2 vs. M2 | - | Metabolism | Metabolism | deoxyribonuclease activity                                                        | GO:0004536 | F | 16   | 7.07E-04 | 2.08E-02 |
| 7 | 3277 | F2 vs. M2 | - | Metabolism | Metabolism | DNA binding                                                                       | GO:0003677 | F | 698  | 1.48E-07 | 2.11E-05 |
| 7 | 3278 | F2 vs. M2 | - | Metabolism | Metabolism | DNA metabolic process                                                             | GO:0006259 | P | 216  | 2.07E-13 | 5.53E-11 |
| 7 | 3279 | F2 vs. M2 | - | Metabolism | Metabolism | DNA secondary structure binding                                                   | GO:0000217 | F | 23   | 2.52E-04 | 9.47E-03 |
| 7 | 3280 | F2 vs. M2 | - | Metabolism | Metabolism | endoribonuclease activity, producing 5'-phosphomonoesters                         | GO:0016891 | F | 25   | 1.96E-03 | 4.31E-02 |
| 7 | 3281 | F2 vs. M2 | - | Metabolism | Metabolism | heterocycle metabolic process                                                     | GO:0046483 | P | 1256 | 2.51E-09 | 2.85E-07 |
| 7 | 3282 | F2 vs. M2 | - | Metabolism | Metabolism | heterocyclic compound binding                                                     | GO:1901363 | F | 2317 | 1.30E-03 | 3.17E-02 |
| 7 | 3283 | F2 vs. M2 | - | Metabolism | Metabolism | macromolecule biosynthetic process                                                | GO:0009059 | P | 745  | 7.73E-07 | 3.50E-05 |
| 7 | 3284 | F2 vs. M2 | - | Metabolism | Metabolism | macromolecule metabolic process                                                   | GO:0043170 | P | 2713 | 1.75E-13 | 4.90E-11 |
| 7 | 3285 | F2 vs. M2 | - | Metabolism | Metabolism | microtubule binding                                                               | GO:0008017 | F | 80   | 1.00E-04 | 4.66E-03 |
| 7 | 3286 | F2 vs. M2 | - | Metabolism | Metabolism | nitrogen compound metabolic process                                               | GO:0006807 | P | 3081 | 1.21E-06 | 5.12E-05 |
| 7 | 3287 | F2 vs. M2 | - | Metabolism | Metabolism | N-methyltransferase activity                                                      | GO:0008170 | F | 40   | 7.96E-05 | 3.98E-03 |
| 7 | 3288 | F2 vs. M2 | - | Metabolism | Metabolism | nucleic acid binding                                                              | GO:0003676 | F | 1619 | 3.41E-10 | 9.22E-08 |
| 7 | 3289 | F2 vs. M2 | - | Metabolism | Metabolism | organic cyclic compound binding                                                   | GO:0097159 | F | 2331 | 1.02E-03 | 2.67E-02 |
| 7 | 3290 | F2 vs. M2 | - | Metabolism | Metabolism | organic cyclic compound metabolic process                                         | GO:1901360 | P | 1368 | 6.56E-06 | 2.06E-04 |
| 7 | 3291 | F2 vs. M2 | - | Metabolism | Metabolism | peptide metabolic process                                                         | GO:0006518 | P | 348  | 2.59E-04 | 4.51E-03 |
| 7 | 3292 | F2 vs. M2 | - | Metabolism | Metabolism | protein metabolic process                                                         | GO:0019538 | P | 1715 | 1.60E-06 | 6.32E-05 |
| 7 | 3293 | F2 vs. M2 | - | Metabolism | Metabolism | pseudouridine synthesis                                                           | GO:0001522 | P | 14   | 3.44E-03 | 3.34E-02 |
| 7 | 3294 | F2 vs. M2 | - | Metabolism | Metabolism | Sm-like protein family complex                                                    | GO:0120114 | C | 51   | 3.61E-08 | 6.86E-07 |
| 7 | 3295 | F2 vs. M2 | - | Metabolism | Metabolism |                                                                                   |            |   |      |          |          |

|   |      |           |   |            |                      |                                                                          |            |   |      |          |          |
|---|------|-----------|---|------------|----------------------|--------------------------------------------------------------------------|------------|---|------|----------|----------|
| 7 | 3296 | F2 vs. M2 | - | Metabolism | Metabolism           | supramolecular complex                                                   | GO:0099080 | C | 135  | 1.13E-04 | 1.06E-03 |
| 7 | 3297 | F2 vs. M2 | - | Metabolism | Metabolism           | transferase complex                                                      | GO:1990234 | C | 376  | 0.00E+00 | 0.00E+00 |
| 7 | 3298 | F2 vs. M2 | - | Metabolism | Metabolism           | transferase complex, transferring phosphorus-containing groups           | GO:0061695 | C | 126  | 1.28E-13 | 4.33E-12 |
| 7 | 3299 | F2 vs. M2 | - | Metabolism | Metabolism           | tubulin binding                                                          | GO:0015631 | F | 83   | 1.85E-04 | 7.57E-03 |
| 7 | 3300 | F2 vs. M2 | - | Metabolism | Transporters         | nuclear export                                                           | GO:0051168 | P | 31   | 2.36E-03 | 2.52E-02 |
| 7 | 3301 | F2 vs. M2 | - | Metabolism | Transporters         | nuclear microtubule                                                      | GO:0005880 | C | 6    | 4.28E-03 | 2.64E-02 |
| 7 | 3302 | F2 vs. M2 | - | Metabolism | Transporters         | nuclear transport                                                        | GO:0051169 | P | 56   | 4.18E-03 | 3.84E-02 |
| 7 | 3303 | F2 vs. M2 | - | Metabolism | Transporters         | nucleic acid transport                                                   | GO:0050657 | P | 33   | 5.03E-04 | 7.69E-03 |
| 7 | 3304 | F2 vs. M2 | - | Metabolism | Transporters         | nucleocytoplasmic transport                                              | GO:0006913 | P | 56   | 4.18E-03 | 3.83E-02 |
| 7 | 3305 | F2 vs. M2 | - | Metabolism | Transporters         | protein export from nucleus                                              | GO:0006611 | P | 27   | 5.59E-03 | 4.74E-02 |
| 7 | 3306 | F2 vs. M2 | - | Metabolism | Transporters         | RNA transport                                                            | GO:0050658 | P | 33   | 5.03E-04 | 7.71E-03 |
| 7 | 3307 | F2 vs. M2 | - | Regulation | Protein modification | methylation                                                              | GO:0032259 | P | 108  | 7.68E-05 | 1.65E-03 |
| 7 | 3308 | F2 vs. M2 | - | Regulation | Protein modification | protein alkylation                                                       | GO:0008213 | P | 41   | 5.33E-05 | 1.20E-03 |
| 7 | 3309 | F2 vs. M2 | - | Regulation | Protein modification | protein heterodimerization activity                                      | GO:0046982 | F | 69   | 5.04E-05 | 2.84E-03 |
| 7 | 3310 | F2 vs. M2 | - | Regulation | Protein modification | protein methylation                                                      | GO:0006479 | P | 41   | 5.33E-05 | 1.21E-03 |
| 7 | 3311 | F2 vs. M2 | - | Regulation | Protein modification | protein methyltransferase activity                                       | GO:0008276 | F | 35   | 7.70E-04 | 2.17E-02 |
| 7 | 3312 | F2 vs. M2 | - | Regulation | Protein modification | regulation of protein metabolic process                                  | GO:0051246 | P | 208  | 3.53E-05 | 8.54E-04 |
| 7 | 3313 | F2 vs. M2 | - | Regulation | Protein modification | peptidyl-lysine modification                                             | GO:0018205 | P | 67   | 2.08E-04 | 3.69E-03 |
| 7 | 3314 | F2 vs. M2 | - | Regulation | Protein modification | protein modification by small protein conjugation or removal             | GO:0070647 | P | 330  | 8.10E-04 | 1.13E-02 |
| 7 | 3315 | F2 vs. M2 | - | Regulation | Protein modification | protein modification by small protein removal                            | GO:0070646 | P | 41   | 2.03E-03 | 2.27E-02 |
| 7 | 3316 | F2 vs. M2 | - | Regulation | Protein modification | protein modification process                                             | GO:0036211 | P | 1146 | 2.68E-05 | 6.92E-04 |
| 7 | 3317 | F2 vs. M2 | - | Regulation | Protein modification | protein-containing complex localization                                  | GO:0031503 | P | 32   | 2.71E-03 | 2.82E-02 |
| 7 | 3318 | F2 vs. M2 | - | Regulation | Protein modification | regulation of protein modification process                               | GO:0031399 | P | 105  | 2.18E-03 | 2.37E-02 |
| 7 | 3319 | F2 vs. M2 | - | Regulation | Regulation           | biological regulation                                                    | GO:0065007 | P | 2712 | 5.32E-03 | 4.54E-02 |
| 7 | 3320 | F2 vs. M2 | - | Regulation | Regulation           | negative regulation of biological process                                | GO:0048519 | P | 588  | 1.13E-05 | 3.21E-04 |
| 7 | 3321 | F2 vs. M2 | - | Regulation | Regulation           | negative regulation of cellular process                                  | GO:0048523 | P | 379  | 9.57E-04 | 1.28E-02 |
| 7 | 3322 | F2 vs. M2 | - | Regulation | Regulation           | negative regulation of macromolecule metabolic process                   | GO:0010605 | P | 312  | 8.68E-07 | 3.86E-05 |
| 7 | 3323 | F2 vs. M2 | - | Regulation | Regulation           | negative regulation of metabolic process                                 | GO:0009892 | P | 347  | 1.01E-04 | 1.98E-03 |
| 7 | 3324 | F2 vs. M2 | - | Regulation | Regulation           | positive regulation of biological process                                | GO:0048518 | P | 594  | 2.35E-04 | 4.14E-03 |
| 7 | 3325 | F2 vs. M2 | - | Regulation | Regulation           | positive regulation of cellular metabolic process                        | GO:0031325 | P | 343  | 1.57E-03 | 1.87E-02 |
| 7 | 3326 | F2 vs. M2 | - | Regulation | Regulation           | positive regulation of cellular process                                  | GO:0048522 | P | 477  | 5.70E-04 | 8.54E-03 |
| 7 | 3327 | F2 vs. M2 | - | Regulation | Regulation           | positive regulation of cellular protein metabolic process                | GO:0032270 | P | 71   | 6.12E-04 | 9.05E-03 |
| 7 | 3328 | F2 vs. M2 | - | Regulation | Regulation           | positive regulation of macromolecule metabolic process                   | GO:0010604 | P | 328  | 7.59E-05 | 1.64E-03 |
| 7 | 3329 | F2 vs. M2 | - | Regulation | Regulation           | positive regulation of metabolic process                                 | GO:0009893 | P | 366  | 1.28E-03 | 1.58E-02 |
| 7 | 3330 | F2 vs. M2 | - | Regulation | Regulation           | positive regulation of nitrogen compound metabolic process               | GO:0051173 | P | 314  | 9.68E-05 | 1.91E-03 |
| 7 | 3331 | F2 vs. M2 | - | Regulation | Regulation           | positive regulation of protein metabolic process                         | GO:0051247 | P | 73   | 5.98E-04 | 8.88E-03 |
| 7 | 3332 | F2 vs. M2 | - | Regulation | Regulation           | regulation of biological process                                         | GO:0050789 | P | 2437 | 3.33E-04 | 5.60E-03 |
| 7 | 3333 | F2 vs. M2 | - | Regulation | Regulation           | regulation of biosynthetic process                                       | GO:0009889 | P | 1032 | 9.36E-05 | 1.87E-03 |
| 7 | 3334 | F2 vs. M2 | - | Regulation | Regulation           | regulation of cellular biosynthetic process                              | GO:0031326 | P | 1011 | 3.47E-05 | 8.44E-04 |
| 7 | 3335 | F2 vs. M2 | - | Regulation | Regulation           | regulation of cellular macromolecule biosynthetic process                | GO:2000112 | P | 953  | 4.72E-07 | 2.25E-05 |
| 7 | 3336 | F2 vs. M2 | - | Regulation | Regulation           | regulation of cellular metabolic process                                 | GO:0031323 | P | 1272 | 4.53E-06 | 1.50E-04 |
| 7 | 3337 | F2 vs. M2 | - | Regulation | Regulation           | regulation of cellular process                                           | GO:0050794 | P | 2110 | 1.67E-03 | 1.95E-02 |
| 7 | 3338 | F2 vs. M2 | - | Regulation | Regulation           | regulation of cellular protein metabolic process                         | GO:0032268 | P | 198  | 9.06E-05 | 1.86E-03 |
| 7 | 3339 | F2 vs. M2 | - | Regulation | Regulation           | regulation of macromolecule biosynthetic process                         | GO:0010556 | P | 961  | 4.97E-07 | 2.35E-05 |
| 7 | 3340 | F2 vs. M2 | - | Regulation | Regulation           | regulation of macromolecule metabolic process                            | GO:0060255 | P | 1299 | 5.89E-13 | 1.37E-10 |
| 7 | 3341 | F2 vs. M2 | - | Regulation | Regulation           | regulation of meristem structural organization                           | GO:0009934 | P | 17   | 1.26E-03 | 1.57E-02 |
| 7 | 3342 | F2 vs. M2 | - | Regulation | Regulation           | regulation of metabolic process                                          | GO:0019222 | P | 1449 | 9.58E-08 | 5.32E-06 |
| 7 | 3343 | F2 vs. M2 | - | Regulation | Regulation           | regulation of nitrogen compound metabolic process                        | GO:0051171 | P | 1144 | 1.92E-08 | 1.56E-06 |
| 7 | 3344 | F2 vs. M2 | - | Regulation | Regulation           | regulation of nucleobase-containing compound metabolic process           | GO:0019219 | P | 943  | 3.52E-07 | 1.72E-05 |
| 7 | 3345 | F2 vs. M2 | - | Regulation | Regulation           | regulation of organelle organization                                     | GO:0033043 | P | 115  | 4.36E-05 | 1.03E-03 |
| 7 | 3346 | F2 vs. M2 | - | Regulation | Regulation           | regulation of primary metabolic process                                  | GO:0080090 | P | 1190 | 2.18E-07 | 1.12E-05 |
| 7 | 3347 | F2 vs. M2 | - | Regulation | Regulation           | regulation of transferase activity                                       | GO:0051338 | P | 52   | 1.47E-04 | 2.75E-03 |
| 7 | 3348 | F2 vs. M2 | - | Regulation | Transcription        | chromatin organization involved in negative regulation of transcription  | GO:0097549 | P | 33   | 1.82E-03 | 2.07E-02 |
| 7 | 3349 | F2 vs. M2 | - | Regulation | Transcription        | chromatin organization involved in regulation of transcription           | GO:0034401 | P | 34   | 2.54E-03 | 2.69E-02 |
| 7 | 3350 | F2 vs. M2 | - | Regulation | Transcription        | chromatin silencing                                                      | GO:0006342 | P | 22   | 1.00E-03 | 1.29E-02 |
| 7 | 3351 | F2 vs. M2 | - | Regulation | Transcription        | covalent chromatin modification                                          | GO:0016569 | P | 84   | 9.85E-06 | 2.89E-04 |
| 7 | 3352 | F2 vs. M2 | - | Regulation | Transcription        | DNA conformation change                                                  | GO:0071103 | P | 67   | 1.02E-03 | 1.31E-02 |
| 7 | 3353 | F2 vs. M2 | - | Regulation | Transcription        | DNA-binding transcription activator activity                             | GO:0001216 | F | 15   | 1.16E-03 | 3.02E-02 |
| 7 | 3354 | F2 vs. M2 | - | Regulation | Transcription        | DNA-binding transcription activator activity, RNA polymerase II-specific | GO:0001228 | F | 11   | 8.62E-04 | 2.38E-02 |
| 7 | 3355 | F2 vs. M2 | - | Regulation | Transcription        | DNA-directed RNA polymerase complex                                      | GO:0000428 | C | 65   | 1.41E-06 | 1.76E-05 |

|   |      |           |   |            |               |                                                                                           |            |   |      |          |          |
|---|------|-----------|---|------------|---------------|-------------------------------------------------------------------------------------------|------------|---|------|----------|----------|
| 7 | 3356 | F2 vs. M2 | - | Regulation | Transcription | dsRNA processing                                                                          | GO:0031050 | P | 34   | 2.36E-06 | 8.87E-05 |
| 7 | 3357 | F2 vs. M2 | - | Regulation | Transcription | gene expression                                                                           | GO:0010467 | P | 870  | 0.00E+00 | 0.00E+00 |
| 7 | 3358 | F2 vs. M2 | - | Regulation | Transcription | gene silencing                                                                            | GO:0016458 | P | 93   | 1.71E-08 | 1.40E-06 |
| 7 | 3359 | F2 vs. M2 | - | Regulation | Transcription | gene silencing by miRNA                                                                   | GO:0035195 | P | 21   | 3.10E-03 | 3.10E-02 |
| 7 | 3360 | F2 vs. M2 | - | Regulation | Transcription | gene silencing by RNA                                                                     | GO:0031047 | P | 62   | 2.54E-06 | 9.34E-05 |
| 7 | 3361 | F2 vs. M2 | - | Regulation | Transcription | histone binding                                                                           | GO:0042393 | F | 44   | 9.89E-04 | 2.64E-02 |
| 7 | 3362 | F2 vs. M2 | - | Regulation | Transcription | histone lysine methylation                                                                | GO:0034968 | P | 24   | 4.10E-04 | 6.74E-03 |
| 7 | 3363 | F2 vs. M2 | - | Regulation | Transcription | histone methylation                                                                       | GO:0016571 | P | 31   | 2.74E-05 | 6.97E-04 |
| 7 | 3364 | F2 vs. M2 | - | Regulation | Transcription | histone methyltransferase activity                                                        | GO:0042054 | F | 22   | 2.11E-04 | 8.38E-03 |
| 7 | 3365 | F2 vs. M2 | - | Regulation | Transcription | histone modification                                                                      | GO:0016570 | P | 81   | 1.41E-05 | 3.90E-04 |
| 7 | 3366 | F2 vs. M2 | - | Regulation | Transcription | macromolecule methylation                                                                 | GO:0043414 | P | 85   | 1.45E-06 | 5.96E-05 |
| 7 | 3367 | F2 vs. M2 | - | Regulation | Transcription | macromolecule modification                                                                | GO:0043412 | P | 1302 | 2.78E-09 | 3.09E-07 |
| 7 | 3368 | F2 vs. M2 | - | Regulation | Transcription | minor groove of adenine-thymine-rich DNA binding                                          | GO:0003680 | F | 18   | 9.22E-04 | 2.49E-02 |
| 7 | 3369 | F2 vs. M2 | - | Regulation | Transcription | mRNA processing                                                                           | GO:0006397 | P | 154  | 6.24E-09 | 6.28E-07 |
| 7 | 3370 | F2 vs. M2 | - | Regulation | Transcription | negative regulation of gene expression                                                    | GO:0010629 | P | 255  | 8.74E-06 | 2.67E-04 |
| 7 | 3371 | F2 vs. M2 | - | Regulation | Transcription | negative regulation of gene expression, epigenetic                                        | GO:0045814 | P | 25   | 1.79E-04 | 3.26E-03 |
| 7 | 3372 | F2 vs. M2 | - | Regulation | Transcription | nuclear DNA-directed RNA polymerase complex                                               | GO:0055029 | C | 60   | 1.80E-07 | 2.81E-06 |
| 7 | 3373 | F2 vs. M2 | - | Regulation | Transcription | nucleic acid-templated transcription                                                      | GO:0097659 | P | 127  | 7.31E-04 | 1.04E-02 |
| 7 | 3374 | F2 vs. M2 | - | Regulation | Transcription | nucleolus                                                                                 | GO:0005730 | C | 296  | 9.63E-11 | 2.54E-09 |
| 7 | 3375 | F2 vs. M2 | - | Regulation | Transcription | peptidyl-lysine methylation                                                               | GO:0018022 | P | 29   | 1.54E-03 | 1.84E-02 |
| 7 | 3376 | F2 vs. M2 | - | Regulation | Transcription | post-transcriptional gene silencing by RNA                                                | GO:0035194 | P | 43   | 9.33E-06 | 2.78E-04 |
| 7 | 3377 | F2 vs. M2 | - | Regulation | Transcription | production of siRNA involved in RNA interference                                          | GO:0030422 | P | 21   | 5.86E-04 | 8.73E-03 |
| 7 | 3378 | F2 vs. M2 | - | Regulation | Transcription | production of small RNA involved in gene silencing by RNA                                 | GO:0070918 | P | 34   | 2.36E-06 | 8.81E-05 |
| 7 | 3379 | F2 vs. M2 | - | Regulation | Transcription | protein acylation                                                                         | GO:0043543 | P | 39   | 1.69E-03 | 1.98E-02 |
| 7 | 3380 | F2 vs. M2 | - | Regulation | Transcription | protein-DNA complex                                                                       | GO:0032993 | C | 32   | 2.73E-06 | 3.33E-05 |
| 7 | 3381 | F2 vs. M2 | - | Regulation | Transcription | protein-DNA complex assembly                                                              | GO:0065004 | P | 37   | 3.22E-04 | 5.42E-03 |
| 7 | 3382 | F2 vs. M2 | - | Regulation | Transcription | protein-DNA complex subunit organization                                                  | GO:0071824 | P | 46   | 4.80E-04 | 7.58E-03 |
| 7 | 3383 | F2 vs. M2 | - | Regulation | Transcription | regulation of DNA-templated transcription, elongation                                     | GO:0032784 | P | 18   | 3.47E-03 | 3.35E-02 |
| 7 | 3384 | F2 vs. M2 | - | Regulation | Transcription | regulation of gene expression                                                             | GO:0010468 | P | 1122 | 8.12E-10 | 9.63E-08 |
| 7 | 3385 | F2 vs. M2 | - | Regulation | Transcription | regulation of gene expression, epigenetic                                                 | GO:0040029 | P | 43   | 5.89E-05 | 1.29E-03 |
| 7 | 3386 | F2 vs. M2 | - | Regulation | Transcription | regulation of nucleic acid-templated transcription                                        | GO:1903506 | P | 853  | 4.05E-06 | 1.39E-04 |
| 7 | 3387 | F2 vs. M2 | - | Regulation | Transcription | regulation of RNA biosynthetic process                                                    | GO:2001141 | P | 855  | 5.99E-06 | 1.93E-04 |
| 7 | 3388 | F2 vs. M2 | - | Regulation | Transcription | regulation of transcription, DNA-templated                                                | GO:0006355 | P | 853  | 4.05E-06 | 1.39E-04 |
| 7 | 3389 | F2 vs. M2 | - | Regulation | Transcription | RNA 3'-end processing                                                                     | GO:0031123 | P | 40   | 6.84E-04 | 9.89E-03 |
| 7 | 3390 | F2 vs. M2 | - | Regulation | Transcription | RNA biosynthetic process                                                                  | GO:0032774 | P | 130  | 6.22E-04 | 9.17E-03 |
| 7 | 3391 | F2 vs. M2 | - | Regulation | Transcription | RNA methylation                                                                           | GO:0001510 | P | 33   | 6.00E-04 | 8.90E-03 |
| 7 | 3392 | F2 vs. M2 | - | Regulation | Transcription | RNA modification                                                                          | GO:0009451 | P | 140  | 7.32E-10 | 8.88E-08 |
| 7 | 3393 | F2 vs. M2 | - | Regulation | Transcription | RNA polymerase complex                                                                    | GO:0030880 | C | 68   | 2.36E-06 | 2.91E-05 |
| 7 | 3394 | F2 vs. M2 | - | Regulation | Transcription | RNA polymerase II, core complex                                                           | GO:0005665 | C | 13   | 1.95E-03 | 1.34E-02 |
| 7 | 3395 | F2 vs. M2 | - | Regulation | Transcription | RNA polymerase II, holoenzyme                                                             | GO:0016591 | C | 37   | 6.88E-05 | 6.60E-04 |
| 7 | 3396 | F2 vs. M2 | - | Regulation | Transcription | RNA polymerase III complex                                                                | GO:0005666 | C | 16   | 3.80E-03 | 2.38E-02 |
| 7 | 3397 | F2 vs. M2 | - | Regulation | Transcription | RNA polymerase IV complex                                                                 | GO:0000418 | C | 9    | 1.21E-03 | 8.84E-03 |
| 7 | 3398 | F2 vs. M2 | - | Regulation | Transcription | RNA polymerase V complex                                                                  | GO:0000419 | C | 14   | 4.35E-04 | 3.62E-03 |
| 7 | 3399 | F2 vs. M2 | - | Regulation | Transcription | siRNA binding                                                                             | GO:0035197 | F | 4    | 8.75E-04 | 2.39E-02 |
| 7 | 3400 | F2 vs. M2 | - | Regulation | Transcription | THO complex                                                                               | GO:0000347 | C | 10   | 2.60E-03 | 1.75E-02 |
| 7 | 3401 | F2 vs. M2 | - | Regulation | Transcription | transcription coregulator activity                                                        | GO:0003712 | F | 64   | 1.44E-03 | 3.38E-02 |
| 7 | 3402 | F2 vs. M2 | - | Regulation | Transcription | transcription factor TFIIF holo complex                                                   | GO:0005675 | C | 7    | 8.83E-03 | 4.76E-02 |
| 7 | 3403 | F2 vs. M2 | - | Regulation | Transcription | transcription, DNA-templated                                                              | GO:0006351 | P | 127  | 7.31E-04 | 1.04E-02 |
| 7 | 3404 | F2 vs. M2 | - | Regulation | Translation   | 90S preribosome                                                                           | GO:0030686 | C | 18   | 1.97E-03 | 1.35E-02 |
| 7 | 3405 | F2 vs. M2 | - | Regulation | Translation   | catalytic activity, acting on RNA                                                         | GO:0140098 | F | 223  | 1.92E-06 | 1.85E-04 |
| 7 | 3406 | F2 vs. M2 | - | Regulation | Translation   | catalytic step 2 spliceosome                                                              | GO:0071013 | C | 34   | 5.00E-05 | 4.94E-04 |
| 7 | 3407 | F2 vs. M2 | - | Regulation | Translation   | cleavage involved in rRNA processing                                                      | GO:0000469 | P | 13   | 2.37E-03 | 2.52E-02 |
| 7 | 3408 | F2 vs. M2 | - | Regulation | Translation   | cytosolic large ribosomal subunit                                                         | GO:0022625 | C | 93   | 1.22E-06 | 1.57E-05 |
| 7 | 3409 | F2 vs. M2 | - | Regulation | Translation   | cytosolic ribosome                                                                        | GO:0022626 | C | 214  | 2.46E-04 | 2.12E-03 |
| 7 | 3410 | F2 vs. M2 | - | Regulation | Translation   | cytosolic small ribosomal subunit                                                         | GO:0022627 | C | 68   | 6.35E-06 | 7.36E-05 |
| 7 | 3411 | F2 vs. M2 | - | Regulation | Translation   | establishment of RNA localization                                                         | GO:0051236 | P | 33   | 5.03E-04 | 7.74E-03 |
| 7 | 3412 | F2 vs. M2 | - | Regulation | Translation   | large ribosomal subunit                                                                   | GO:0015934 | C | 118  | 8.02E-08 | 1.38E-06 |
| 7 | 3413 | F2 vs. M2 | - | Regulation | Translation   | Lsm1-7-Pat1 complex                                                                       | GO:1990726 | C | 7    | 8.04E-03 | 4.47E-02 |
| 7 | 3414 | F2 vs. M2 | - | Regulation | Translation   | maturation of 5.8S rRNA from tricistronic rRNA transcript (SSU-rRNA, 5.8S rRNA, LSU-rRNA) | GO:0000466 | P | 10   | 2.62E-03 | 2.75E-02 |
| 7 | 3415 | F2 vs. M2 | - | Regulation | Translation   | maturation of SSU-rRNA                                                                    | GO:0030490 | P | 32   | 4.13E-05 | 9.88E-04 |
| 7 | 3416 | F2 vs. M2 | - | Regulation | Translation   | maturation of SSU-rRNA from tricistronic rRNA transcript (SSU-rRNA, 5.8S rRNA, LSU-rRNA)  | GO:0000462 | P | 21   | 1.83E-03 | 2.07E-02 |
| 7 | 3417 | F2 vs. M2 | - | Regulation | Translation   | mitochondrial large ribosomal subunit                                                     | GO:0005762 | C | 16   | 1.02E-03 | 7.76E-03 |

|   |      |           |   |            |             |                                                               |            |   |     |          |          |
|---|------|-----------|---|------------|-------------|---------------------------------------------------------------|------------|---|-----|----------|----------|
| 7 | 3418 | F2 vs. M2 | - | Regulation | Translation | mitochondrial ribosome                                        | GO:0005761 | C | 25  | 2.28E-04 | 1.99E-03 |
| 7 | 3419 | F2 vs. M2 | - | Regulation | Translation | mRNA export from nucleus                                      | GO:0006406 | P | 18  | 4.96E-03 | 4.37E-02 |
| 7 | 3420 | F2 vs. M2 | - | Regulation | Translation | mRNA metabolic process                                        | GO:0016071 | P | 224 | 1.03E-08 | 9.03E-07 |
| 7 | 3421 | F2 vs. M2 | - | Regulation | Translation | mRNA modification                                             | GO:0016556 | P | 23  | 5.90E-03 | 4.94E-02 |
| 7 | 3422 | F2 vs. M2 | - | Regulation | Translation | mRNA splicing, via spliceosome                                | GO:0000398 | P | 114 | 2.81E-08 | 2.14E-06 |
| 7 | 3423 | F2 vs. M2 | - | Regulation | Translation | mRNA transport                                                | GO:0051028 | P | 19  | 1.91E-03 | 2.15E-02 |
|   |      |           |   |            |             |                                                               |            |   |     |          |          |
| 7 | 3424 | F2 vs. M2 | - | Regulation | Translation | mRNA-containing ribonucleoprotein complex export from nucleus | GO:0071427 | P | 18  | 4.96E-03 | 4.38E-02 |
| 7 | 3425 | F2 vs. M2 | - | Regulation | Translation | ncRNA 3'-end processing                                       | GO:0043628 | P | 21  | 4.22E-04 | 6.87E-03 |
| 7 | 3426 | F2 vs. M2 | - | Regulation | Translation | ncRNA metabolic process                                       | GO:0034660 | P | 247 | 8.39E-08 | 4.82E-06 |
| 7 | 3427 | F2 vs. M2 | - | Regulation | Translation | ncRNA processing                                              | GO:0034470 | P | 211 | 7.72E-08 | 4.53E-06 |
| 7 | 3428 | F2 vs. M2 | - | Regulation | Translation | organellar large ribosomal subunit                            | GO:0000315 | C | 23  | 2.78E-03 | 1.86E-02 |
| 7 | 3429 | F2 vs. M2 | - | Regulation | Translation | organellar ribosome                                           | GO:0000313 | C | 39  | 1.27E-03 | 9.07E-03 |
| 7 | 3430 | F2 vs. M2 | - | Regulation | Translation | peptide biosynthetic process                                  | GO:0043043 | P | 311 | 6.09E-06 | 1.95E-04 |
| 7 | 3431 | F2 vs. M2 | - | Regulation | Translation | pICln-Sm protein complex                                      | GO:0034715 | C | 5   | 3.64E-03 | 2.30E-02 |
| 7 | 3432 | F2 vs. M2 | - | Regulation | Translation | posttranscriptional gene silencing                            | GO:0016441 | P | 48  | 1.30E-05 | 3.66E-04 |
| 7 | 3433 | F2 vs. M2 | - | Regulation | Translation | posttranscriptional regulation of gene expression             | GO:0010608 | P | 131 | 2.56E-04 | 4.46E-03 |
| 7 | 3434 | F2 vs. M2 | - | Regulation | Translation | precatalytic spliceosome                                      | GO:0071011 | C | 22  | 1.25E-04 | 1.16E-03 |
| 7 | 3435 | F2 vs. M2 | - | Regulation | Translation | preribosome                                                   | GO:0030684 | C | 54  | 9.19E-06 | 1.03E-04 |
| 7 | 3436 | F2 vs. M2 | - | Regulation | Translation | preribosome, large subunit precursor                          | GO:0030687 | C | 15  | 2.87E-03 | 1.90E-02 |
| 7 | 3437 | F2 vs. M2 | - | Regulation | Translation | prespliceosome                                                | GO:0071010 | C | 12  | 5.17E-03 | 3.11E-02 |
| 7 | 3438 | F2 vs. M2 | - | Regulation | Translation | production of miRNAs involved in gene silencing by miRNA      | GO:0035196 | P | 14  | 1.75E-03 | 2.02E-02 |
| 7 | 3439 | F2 vs. M2 | - | Regulation | Translation | regulation of RNA metabolic process                           | GO:0051252 | P | 919 | 1.66E-06 | 6.48E-05 |
| 7 | 3440 | F2 vs. M2 | - | Regulation | Translation | regulation of RNA splicing                                    | GO:0043484 | P | 38  | 5.09E-03 | 4.43E-02 |
| 7 | 3441 | F2 vs. M2 | - | Regulation | Translation | regulatory RNA binding                                        | GO:0061980 | F | 7   | 1.61E-03 | 3.72E-02 |
| 7 | 3442 | F2 vs. M2 | - | Regulation | Translation | ribonuclease activity                                         | GO:0004540 | F | 65  | 6.25E-04 | 1.96E-02 |
| 7 | 3443 | F2 vs. M2 | - | Regulation | Translation | ribonucleoprotein complex                                     | GO:1990904 | C | 399 | 0.00E+00 | 0.00E+00 |
| 7 | 3444 | F2 vs. M2 | - | Regulation | Translation | ribonucleoprotein complex assembly                            | GO:0022618 | P | 104 | 2.65E-05 | 6.89E-04 |
| 7 | 3445 | F2 vs. M2 | - | Regulation | Translation | ribonucleoprotein complex biogenesis                          | GO:0022613 | P | 265 | 5.68E-09 | 5.83E-07 |
| 7 | 3446 | F2 vs. M2 | - | Regulation | Translation | ribonucleoprotein complex export from nucleus                 | GO:0071426 | P | 27  | 5.59E-03 | 4.73E-02 |
| 7 | 3447 | F2 vs. M2 | - | Regulation | Translation | ribonucleoprotein complex localization                        | GO:0071166 | P | 27  | 5.59E-03 | 4.72E-02 |
| 7 | 3448 | F2 vs. M2 | - | Regulation | Translation | ribonucleoprotein complex subunit organization                | GO:0071826 | P | 107 | 1.57E-05 | 4.26E-04 |
| 7 | 3449 | F2 vs. M2 | - | Regulation | Translation | ribosomal large subunit biogenesis                            | GO:0042273 | P | 74  | 1.54E-03 | 1.84E-02 |
| 7 | 3450 | F2 vs. M2 | - | Regulation | Translation | ribosomal small subunit biogenesis                            | GO:0042274 | P | 59  | 1.45E-04 | 2.73E-03 |
| 7 | 3451 | F2 vs. M2 | - | Regulation | Translation | ribosomal subunit                                             | GO:0044391 | C | 207 | 1.78E-13 | 5.83E-12 |
| 7 | 3452 | F2 vs. M2 | - | Regulation | Translation | ribosome                                                      | GO:0005840 | C | 268 | 7.26E-06 | 8.21E-05 |
| 7 | 3453 | F2 vs. M2 | - | Regulation | Translation | ribosome biogenesis                                           | GO:0042254 | P | 221 | 1.08E-06 | 4.59E-05 |
| 7 | 3454 | F2 vs. M2 | - | Regulation | Translation | RNA cap binding                                               | GO:0000339 | F | 6   | 1.43E-03 | 3.39E-02 |
| 7 | 3455 | F2 vs. M2 | - | Regulation | Translation | RNA export from nucleus                                       | GO:0006405 | P | 31  | 2.36E-03 | 2.52E-02 |
| 7 | 3456 | F2 vs. M2 | - | Regulation | Translation | RNA interference                                              | GO:0016246 | P | 23  | 4.01E-03 | 3.69E-02 |
| 7 | 3457 | F2 vs. M2 | - | Regulation | Translation | RNA localization                                              | GO:0006403 | P | 37  | 1.23E-04 | 2.40E-03 |
| 7 | 3458 | F2 vs. M2 | - | Regulation | Translation | RNA methyltransferase activity                                | GO:0008173 | F | 31  | 2.54E-03 | 5.00E-02 |
| 7 | 3459 | F2 vs. M2 | - | Regulation | Translation | RNA phosphodiester bond hydrolysis                            | GO:0090501 | P | 25  | 4.57E-05 | 1.05E-03 |
| 7 | 3460 | F2 vs. M2 | - | Regulation | Translation | RNA processing                                                | GO:0006396 | P | 418 | 1.11E-16 | 5.39E-14 |
| 7 | 3461 | F2 vs. M2 | - | Regulation | Translation | RNA splicing                                                  | GO:0008380 | P | 147 | 1.35E-07 | 7.29E-06 |
| 7 | 3462 | F2 vs. M2 | - | Regulation | Translation | RNA splicing, via transesterification reactions               | GO:0000375 | P | 122 | 3.50E-08 | 2.39E-06 |
|   |      |           |   |            |             |                                                               |            |   |     |          |          |
| 7 | 3463 | F2 vs. M2 | - | Regulation | Translation | adenosine as nucleophile                                      | GO:0000377 | P | 122 | 3.50E-08 | 2.42E-06 |
| 7 | 3464 | F2 vs. M2 | - | Regulation | Translation | rRNA metabolic process                                        | GO:0016072 | P | 148 | 1.25E-04 | 2.41E-03 |
| 7 | 3465 | F2 vs. M2 | - | Regulation | Translation | rRNA processing                                               | GO:0006364 | P | 142 | 1.30E-04 | 2.50E-03 |
| 7 | 3466 | F2 vs. M2 | - | Regulation | Translation | small nuclear ribonucleoprotein complex                       | GO:0030532 | C | 45  | 4.83E-08 | 8.83E-07 |
| 7 | 3467 | F2 vs. M2 | - | Regulation | Translation | small nucleolar ribonucleoprotein complex                     | GO:0005732 | C | 19  | 1.40E-04 | 1.29E-03 |
| 7 | 3468 | F2 vs. M2 | - | Regulation | Translation | small ribosomal subunit                                       | GO:0015935 | C | 89  | 3.33E-07 | 4.94E-06 |
| 7 | 3469 | F2 vs. M2 | - | Regulation | Translation | small-subunit processome                                      | GO:0032040 | C | 30  | 1.23E-03 | 8.94E-03 |
| 7 | 3470 | F2 vs. M2 | - | Regulation | Translation | snoRNA binding                                                | GO:0030515 | F | 16  | 1.27E-03 | 3.11E-02 |
| 7 | 3471 | F2 vs. M2 | - | Regulation | Translation | spliceosomal complex                                          | GO:0005681 | C | 80  | 3.42E-06 | 4.12E-05 |
| 7 | 3472 | F2 vs. M2 | - | Regulation | Translation | spliceosomal snRNP assembly                                   | GO:0000387 | P | 17  | 1.43E-03 | 1.72E-02 |
| 7 | 3473 | F2 vs. M2 | - | Regulation | Translation | spliceosomal snRNP complex                                    | GO:0097525 | C | 45  | 4.83E-08 | 9.00E-07 |
| 7 | 3474 | F2 vs. M2 | - | Regulation | Translation | spliceosomal tri-snRNP complex                                | GO:0097526 | C | 28  | 2.97E-07 | 4.47E-06 |
| 7 | 3475 | F2 vs. M2 | - | Regulation | Translation | structural constituent of ribosome                            | GO:0003735 | F | 200 | 4.56E-09 | 8.80E-07 |
| 7 | 3476 | F2 vs. M2 | - | Regulation | Translation | translation                                                   | GO:0006412 | P | 310 | 3.89E-06 | 1.36E-04 |
| 7 | 3477 | F2 vs. M2 | - | Regulation | Translation | tRNA metabolic process                                        | GO:0006399 | P | 89  | 9.23E-05 | 1.87E-03 |
| 7 | 3478 | F2 vs. M2 | - | Regulation | Translation | tRNA modification                                             | GO:0006400 | P | 46  | 1.00E-03 | 1.29E-02 |
| 7 | 3479 | F2 vs. M2 | - | Regulation | Translation | tRNA processing                                               | GO:0008033 | P | 56  | 3.09E-05 | 7.78E-04 |



|   |      |           |   |                        |               |                                                                           |            |   |      |          |          |
|---|------|-----------|---|------------------------|---------------|---------------------------------------------------------------------------|------------|---|------|----------|----------|
| 7 | 3480 | F2 vs. M2 | - | Regulation             | Translation   | U1 snRNP                                                                  | GO:0005685 | C | 17   | 4.94E-05 | 4.94E-04 |
| 7 | 3481 | F2 vs. M2 | - | Regulation             | Translation   | U12-type spliceosomal complex                                             | GO:0005689 | C | 16   | 2.77E-04 | 2.35E-03 |
| 7 | 3482 | F2 vs. M2 | - | Regulation             | Translation   | U2 snRNP                                                                  | GO:0005686 | C | 21   | 1.69E-04 | 1.50E-03 |
| 7 | 3483 | F2 vs. M2 | - | Regulation             | Translation   | U2-type prespliceosome                                                    | GO:0071004 | C | 12   | 5.17E-03 | 3.09E-02 |
| 7 | 3484 | F2 vs. M2 | - | Regulation             | Translation   | U2-type spliceosomal complex                                              | GO:0005684 | C | 30   | 3.08E-03 | 2.02E-02 |
| 7 | 3485 | F2 vs. M2 | - | Regulation             | Translation   | U4 snRNP                                                                  | GO:0005687 | C | 10   | 1.68E-04 | 1.51E-03 |
| 7 | 3486 | F2 vs. M2 | - | Regulation             | Translation   | U4/U6 x U5 tri-snRNP complex                                              | GO:0046540 | C | 20   | 2.46E-05 | 2.66E-04 |
| 7 | 3487 | F2 vs. M2 | - | Regulation             | translation   | U5 snRNP                                                                  | GO:0005682 | C | 13   | 3.26E-05 | 3.37E-04 |
| 7 | 3488 | F2 vs. M2 | - | Regulation             | Translation   | U6 snRNP                                                                  | GO:0005688 | C | 9    | 8.05E-03 | 4.45E-02 |
| 7 | 3489 | F2 vs. M2 | - | Signaling and response | Signaling     | kinase regulator activity                                                 | GO:0019207 | F | 50   | 2.35E-05 | 1.59E-03 |
| 7 | 3490 | F2 vs. M2 | - | Signaling and response | Signaling     | protein kinase complex                                                    | GO:1902911 | C | 49   | 1.03E-08 | 2.04E-07 |
| 7 | 3491 | F2 vs. M2 | - | Signaling and response | Signaling     | protein kinase regulator activity                                         | GO:0019887 | F | 49   | 1.35E-05 | 9.63E-04 |
|   |      |           |   |                        |               | regulation of cyclin-dependent protein serine/threonine kinase activity   | GO:0000079 | P | 35   | 4.42E-04 | 7.06E-03 |
| 7 | 3492 | F2 vs. M2 | - | Signaling and response | Signaling     | regulation of kinase activity                                             | GO:0043549 | P | 45   | 2.23E-05 | 5.86E-04 |
| 7 | 3493 | F2 vs. M2 | - | Signaling and response | Signaling     | regulation of phosphorylation                                             | GO:0042325 | P | 64   | 2.57E-03 | 2.71E-02 |
| 7 | 3494 | F2 vs. M2 | - | Signaling and response | Signaling     | regulation of protein kinase activity                                     | GO:0045859 | P | 44   | 1.98E-05 | 5.28E-04 |
| 7 | 3495 | F2 vs. M2 | - | Signaling and response | Signaling     | regulation of protein phosphorylation                                     | GO:0001932 | P | 57   | 4.80E-04 | 7.56E-03 |
| 7 | 3496 | F2 vs. M2 | - | Signaling and response | Signaling     | regulation of protein serine/threonine kinase activity                    | GO:0071900 | P | 39   | 4.63E-04 | 7.34E-03 |
| 7 | 3497 | F2 vs. M2 | - | Signaling and response | Signaling     | serine/threonine protein kinase complex                                   | GO:1902554 | C | 44   | 1.94E-09 | 4.29E-08 |
| 7 | 3498 | F2 vs. M2 | - | Signaling and response | Signaling     | cellular response to DNA damage stimulus                                  | GO:0006974 | P | 180  | 4.63E-13 | 1.12E-10 |
| 7 | 3499 | F2 vs. M2 | - | Signaling and response | Stress        | interaction with host                                                     | GO:0051701 | P | 18   | 3.06E-03 | 3.07E-02 |
| 7 | 3500 | F2 vs. M2 | - | Signaling and response | Stress        | modulation by symbiont of host process                                    | GO:0044003 | P | 9    | 5.19E-03 | 4.48E-02 |
| 7 | 3501 | F2 vs. M2 | - | Signaling and response | Stress        | modulation of process of other organism                                   | GO:0035821 | P | 9    | 5.19E-03 | 4.48E-02 |
| 7 | 3502 | F2 vs. M2 | - | Signaling and response | Stress        | modulation of process of other organism involved in symbiotic interaction | GO:0051817 | P | 9    | 5.19E-03 | 4.49E-02 |
| 7 | 3503 | F2 vs. M2 | - | Signaling and response | Stress        | RNA-dependent DNA biosynthetic process                                    | GO:0006278 | P | 4    | 1.89E-03 | 2.13E-02 |
| 7 | 3504 | F2 vs. M2 | - | Signaling and response | Stress        | nucleobase-containing small molecule metabolic process                    | GO:0055086 | P | 279  | 9.21E-05 | 1.56E-03 |
| 8 | 3505 | F3 vs. M3 | + | Development            | Cell division | nucleotide-sugar biosynthetic process                                     | GO:0009226 | P | 39   | 3.50E-04 | 4.83E-03 |
| 8 | 3506 | F3 vs. M3 | + | Development            | Cell division | nucleotide-sugar metabolic process                                        | GO:0009225 | P | 45   | 3.65E-04 | 4.99E-03 |
| 8 | 3507 | F3 vs. M3 | + | Development            | Cell division | pollen germination                                                        | GO:0009846 | P | 41   | 3.02E-03 | 2.75E-02 |
| 8 | 3508 | F3 vs. M3 | + | Development            | Cell division | pollen tube development                                                   | GO:0048868 | P | 118  | 3.55E-10 | 2.41E-08 |
| 8 | 3509 | F3 vs. M3 | + | Development            | Cell division | pollen tube growth                                                        | GO:0009860 | P | 93   | 5.30E-11 | 4.27E-09 |
| 8 | 3510 | F3 vs. M3 | + | Development            | Cell division | pollination                                                               | GO:0009856 | P | 163  | 3.62E-08 | 1.58E-06 |
| 8 | 3511 | F3 vs. M3 | + | Development            | Cell division | ribonucleotide metabolic process                                          | GO:0009259 | P | 160  | 5.06E-03 | 4.21E-02 |
| 8 | 3512 | F3 vs. M3 | + | Development            | Cell division | ribose phosphate metabolic process                                        | GO:0019693 | P | 165  | 5.48E-03 | 4.44E-02 |
| 8 | 3513 | F3 vs. M3 | + | Development            | Cell division | syncytium formation                                                       | GO:0006949 | P | 12   | 2.50E-06 | 6.74E-05 |
| 8 | 3514 | F3 vs. M3 | + | Development            | Development   | actin cytoskeleton                                                        | GO:0015629 | C | 40   | 4.42E-04 | 3.88E-03 |
| 8 | 3515 | F3 vs. M3 | + | Development            | Development   | actin cytoskeleton organization                                           | GO:0030036 | P | 68   | 2.23E-04 | 3.31E-03 |
| 8 | 3516 | F3 vs. M3 | + | Development            | Development   | anatomical structure morphogenesis                                        | GO:0009653 | P | 557  | 1.63E-04 | 2.52E-03 |
| 8 | 3517 | F3 vs. M3 | + | Development            | Development   | apical part of cell                                                       | GO:0045177 | C | 17   | 1.72E-04 | 1.63E-03 |
| 8 | 3518 | F3 vs. M3 | + | Development            | Development   | apical plasma membrane                                                    | GO:0016324 | C | 15   | 4.47E-05 | 4.67E-04 |
| 8 | 3519 | F3 vs. M3 | + | Development            | Development   | apoplast                                                                  | GO:0048046 | C | 184  | 0.00E+00 | 0.00E+00 |
| 8 | 3520 | F3 vs. M3 | + | Development            | Development   | bounding membrane of organelle                                            | GO:0098588 | C | 625  | 8.00E-09 | 1.59E-07 |
| 8 | 3521 | F3 vs. M3 | + | Development            | Development   | cell development                                                          | GO:0048468 | P | 207  | 5.73E-06 | 1.38E-04 |
| 8 | 3522 | F3 vs. M3 | + | Development            | Development   | cell growth                                                               | GO:0016049 | P | 255  | 5.31E-11 | 4.22E-09 |
| 8 | 3523 | F3 vs. M3 | + | Development            | Development   | cell junction                                                             | GO:0030054 | C | 654  | 7.73E-03 | 4.36E-02 |
| 8 | 3524 | F3 vs. M3 | + | Development            | Development   | cell morphogenesis                                                        | GO:0000902 | P | 241  | 9.52E-08 | 3.78E-06 |
| 8 | 3525 | F3 vs. M3 | + | Development            | Development   | cell morphogenesis involved in differentiation                            | GO:0000904 | P | 154  | 7.53E-07 | 2.30E-05 |
| 8 | 3526 | F3 vs. M3 | + | Development            | Development   | cell periphery                                                            | GO:0071944 | C | 2517 | 3.33E-16 | 1.14E-14 |
| 8 | 3527 | F3 vs. M3 | + | Development            | Development   | cell pole                                                                 | GO:0060187 | C | 15   | 7.55E-04 | 6.19E-03 |
| 8 | 3528 | F3 vs. M3 | + | Development            | Development   | cell projection                                                           | GO:0042995 | C | 70   | 8.99E-10 | 1.98E-08 |
| 8 | 3529 | F3 vs. M3 | + | Development            | Development   | cell tip                                                                  | GO:0051286 | C | 15   | 7.55E-04 | 6.14E-03 |
| 8 | 3530 | F3 vs. M3 | + | Development            | Development   | cell tip growth                                                           | GO:0009932 | P | 110  | 3.95E-12 | 4.22E-10 |
| 8 | 3531 | F3 vs. M3 | + | Development            | Development   | cell wall                                                                 | GO:0005618 | C | 384  | 1.52E-05 | 1.71E-04 |
| 8 | 3532 | F3 vs. M3 | + | Development            | Development   | cell wall biogenesis                                                      | GO:0042546 | P | 155  | 5.08E-04 | 6.61E-03 |
| 8 | 3533 | F3 vs. M3 | + | Development            | Development   | cell wall modification                                                    | GO:0042545 | P | 110  | 1.59E-05 | 3.36E-04 |
| 8 | 3534 | F3 vs. M3 | + | Development            | Development   | cell wall organization                                                    | GO:0071555 | P | 176  | 2.42E-07 | 8.38E-06 |
| 8 | 3535 | F3 vs. M3 | + | Development            | Development   | cell wall organization or biogenesis                                      | GO:0071554 | P | 323  | 1.16E-08 | 5.51E-07 |
| 8 | 3536 | F3 vs. M3 | + | Development            | Development   | cell wall pectin metabolic process                                        | GO:0052546 | P | 19   | 3.73E-04 | 5.07E-03 |
| 8 | 3537 | F3 vs. M3 | + | Development            | Development   | cell-cell junction                                                        | GO:0005911 | C | 654  | 7.73E-03 | 4.43E-02 |
| 8 | 3538 | F3 vs. M3 | + | Development            | Development   | cellular process                                                          | GO:0009987 | P | 7297 | 2.51E-03 | 2.43E-02 |
| 8 | 3539 | F3 vs. M3 | + | Development            | Development   | cytoplasm                                                                 | GO:0005737 | C | 8318 | 5.13E-07 | 7.60E-06 |
| 8 | 3540 | F3 vs. M3 | + | Development            | Development   | cytosol                                                                   | GO:0005829 | C | 2260 | 2.43E-13 | 7.10E-12 |
| 8 | 3541 | F3 vs. M3 | + | Development            | Development   |                                                                           |            |   |      |          |          |

|   |      |           |   |             |               |                                                                                  |            |   |      |          |          |
|---|------|-----------|---|-------------|---------------|----------------------------------------------------------------------------------|------------|---|------|----------|----------|
| 8 | 3542 | F3 vs. M3 | + | Development | Development   | developmental cell growth                                                        | GO:0048588 | P | 130  | 8.98E-12 | 8.32E-10 |
| 8 | 3543 | F3 vs. M3 | + | Development | Development   | developmental growth                                                             | GO:0048589 | P | 250  | 8.80E-13 | 1.29E-10 |
| 8 | 3544 | F3 vs. M3 | + | Development | Development   | developmental growth involved in morphogenesis                                   | GO:0060560 | P | 218  | 1.04E-12 | 1.38E-10 |
| 8 | 3545 | F3 vs. M3 | + | Development | Development   | endomembrane system                                                              | GO:0012505 | C | 1484 | 1.22E-08 | 2.28E-07 |
| 8 | 3546 | F3 vs. M3 | + | Development | Development   | envelope                                                                         | GO:0031975 | C | 727  | 0.00E+00 | 0.00E+00 |
| 8 | 3547 | F3 vs. M3 | + | Development | Development   | external encapsulating structure                                                 | GO:0030312 | C | 386  | 8.19E-06 | 9.45E-05 |
| 8 | 3548 | F3 vs. M3 | + | Development | Development   | external encapsulating structure organization                                    | GO:0045229 | P | 210  | 3.12E-07 | 1.05E-05 |
| 8 | 3549 | F3 vs. M3 | + | Development | Development   | extracellular region                                                             | GO:0005576 | C | 1456 | 9.22E-11 | 2.29E-09 |
| 8 | 3550 | F3 vs. M3 | + | Development | Development   | Golgi apparatus subcompartment                                                   | GO:0098791 | C | 299  | 9.12E-09 | 1.74E-07 |
| 8 | 3551 | F3 vs. M3 | + | Development | Development   | Golgi cisterna                                                                   | GO:0031985 | C | 127  | 2.14E-03 | 1.48E-02 |
| 8 | 3552 | F3 vs. M3 | + | Development | Development   | Golgi stack                                                                      | GO:0005795 | C | 132  | 1.42E-03 | 1.04E-02 |
| 8 | 3553 | F3 vs. M3 | + | Development | Development   | Golgi trans cisterna                                                             | GO:0000138 | C | 59   | 3.51E-04 | 3.14E-03 |
| 8 | 3554 | F3 vs. M3 | + | Development | Development   | growing cell tip                                                                 | GO:0035838 | C | 11   | 1.55E-03 | 1.13E-02 |
| 8 | 3555 | F3 vs. M3 | + | Development | Development   | growth                                                                           | GO:0040007 | P | 290  | 1.17E-11 | 1.03E-09 |
| 8 | 3556 | F3 vs. M3 | + | Development | Development   | intracellular vesicle                                                            | GO:0097708 | C | 487  | 1.09E-07 | 1.80E-06 |
| 8 | 3557 | F3 vs. M3 | + | Development | Development   | membrane                                                                         | GO:0016020 | C | 3440 | 0.00E+00 | 0.00E+00 |
| 8 | 3558 | F3 vs. M3 | + | Development | Development   | membrane protein complex                                                         | GO:0098796 | C | 402  | 7.14E-04 | 5.90E-03 |
| 8 | 3559 | F3 vs. M3 | + | Development | Development   | microbody                                                                        | GO:0042579 | C | 204  | 1.73E-06 | 2.23E-05 |
| 8 | 3560 | F3 vs. M3 | + | Development | Development   | multi-multicellular organism process                                             | GO:0044706 | P | 163  | 3.62E-08 | 1.59E-06 |
| 8 | 3561 | F3 vs. M3 | + | Development | Development   | organelle envelope                                                               | GO:0031967 | C | 727  | 0.00E+00 | 0.00E+00 |
| 8 | 3562 | F3 vs. M3 | + | Development | Development   | organelle inner membrane                                                         | GO:0019866 | C | 204  | 3.36E-03 | 2.12E-02 |
| 8 | 3563 | F3 vs. M3 | + | Development | Development   | organelle membrane                                                               | GO:0031090 | C | 967  | 1.44E-07 | 2.30E-06 |
| 8 | 3564 | F3 vs. M3 | + | Development | Development   | organelle subcompartment                                                         | GO:0031984 | C | 797  | 0.00E+00 | 0.00E+00 |
| 8 | 3565 | F3 vs. M3 | + | Development | Development   | plant-type cell wall biogenesis                                                  | GO:0009832 | P | 100  | 2.84E-04 | 4.07E-03 |
| 8 | 3566 | F3 vs. M3 | + | Development | Development   | plant-type cell wall loosening                                                   | GO:0009828 | P | 24   | 4.24E-05 | 7.98E-04 |
| 8 | 3567 | F3 vs. M3 | + | Development | Development   | plant-type cell wall modification                                                | GO:0009827 | P | 45   | 5.37E-06 | 1.31E-04 |
| 8 | 3568 | F3 vs. M3 | + | Development | Development   | plant-type cell wall organization                                                | GO:0009664 | P | 100  | 1.17E-06 | 3.46E-05 |
| 8 | 3569 | F3 vs. M3 | + | Development | Development   | plant-type cell wall organization or biogenesis                                  | GO:0071669 | P | 174  | 9.18E-08 | 3.67E-06 |
| 8 | 3570 | F3 vs. M3 | + | Development | Development   | plant-type primary cell wall biogenesis                                          | GO:0009833 | P | 21   | 3.11E-04 | 4.35E-03 |
| 8 | 3571 | F3 vs. M3 | + | Development | Development   | plant-type vacuole                                                               | GO:0000325 | C | 108  | 1.67E-05 | 1.84E-04 |
| 8 | 3572 | F3 vs. M3 | + | Development | Development   | plant-type vacuole membrane                                                      | GO:0009705 | C | 75   | 7.90E-04 | 6.37E-03 |
| 8 | 3573 | F3 vs. M3 | + | Development | Development   | plasma membrane                                                                  | GO:0005886 | C | 2208 | 4.39E-14 | 1.40E-12 |
| 8 | 3574 | F3 vs. M3 | + | Development | Development   | plasma membrane bounded cell projection                                          | GO:0120025 | C | 62   | 7.35E-13 | 2.08E-11 |
| 8 | 3575 | F3 vs. M3 | + | Development | Development   | plasma membrane region                                                           | GO:0098590 | C | 33   | 3.95E-03 | 2.46E-02 |
| 8 | 3576 | F3 vs. M3 | + | Development | Development   | pollen tube                                                                      | GO:0090406 | C | 52   | 4.90E-11 | 1.28E-09 |
| 8 | 3577 | F3 vs. M3 | + | Development | Development   | pollen tube tip                                                                  | GO:0090404 | C | 11   | 1.55E-03 | 1.13E-02 |
| 8 | 3578 | F3 vs. M3 | + | Development | Development   | root hair                                                                        | GO:0035618 | C | 11   | 2.00E-03 | 1.41E-02 |
| 8 | 3579 | F3 vs. M3 | + | Development | Development   | root hair elongation                                                             | GO:0048767 | P | 44   | 5.17E-03 | 4.28E-02 |
| 8 | 3580 | F3 vs. M3 | + | Development | Development   | stromule                                                                         | GO:0010319 | C | 30   | 1.01E-10 | 2.45E-09 |
| 8 | 3581 | F3 vs. M3 | + | Development | Development   | structural constituent of cytoskeleton                                           | GO:0005200 | F | 23   | 1.39E-03 | 2.98E-02 |
| 8 | 3582 | F3 vs. M3 | + | Development | Development   | symplast                                                                         | GO:0055044 | C | 654  | 7.73E-03 | 4.41E-02 |
| 8 | 3583 | F3 vs. M3 | + | Development | Development   | unidimensional cell growth                                                       | GO:0009826 | P | 190  | 2.37E-11 | 2.02E-09 |
| 8 | 3584 | F3 vs. M3 | + | Development | Development   | vacuolar membrane                                                                | GO:0005774 | C | 394  | 7.11E-10 | 1.60E-08 |
| 8 | 3585 | F3 vs. M3 | + | Development | Development   | vacuole                                                                          | GO:0005773 | C | 726  | 2.22E-16 | 7.87E-15 |
| 8 | 3586 | F3 vs. M3 | + | Metabolism  | Bioenergetics | acetyl-CoA biosynthetic process                                                  | GO:0006085 | P | 14   | 5.76E-03 | 4.61E-02 |
| 8 | 3587 | F3 vs. M3 | + | Metabolism  | Bioenergetics | acyl-CoA biosynthetic process                                                    | GO:0071616 | P | 18   | 3.37E-03 | 3.05E-02 |
| 8 | 3588 | F3 vs. M3 | + | Metabolism  | Bioenergetics | aerobic respiration                                                              | GO:0009060 | P | 62   | 4.68E-06 | 1.17E-04 |
| 8 | 3589 | F3 vs. M3 | + | Metabolism  | Bioenergetics | ATP metabolic process                                                            | GO:0046034 | P | 96   | 3.78E-04 | 5.10E-03 |
| 8 | 3590 | F3 vs. M3 | + | Metabolism  | Bioenergetics | ATP synthesis coupled electron transport                                         | GO:0042773 | P | 30   | 1.68E-03 | 1.77E-02 |
| 8 | 3591 | F3 vs. M3 | + | Metabolism  | Bioenergetics | ATPase activity, coupled to transmembrane movement of ions, rotational mechanism | GO:0044769 | F | 20   | 9.93E-04 | 2.27E-02 |
| 8 | 3592 | F3 vs. M3 | + | Metabolism  | Bioenergetics | carbohydrate biosynthetic process                                                | GO:0016051 | P | 212  | 4.46E-12 | 4.42E-10 |
| 8 | 3593 | F3 vs. M3 | + | Metabolism  | Bioenergetics | carbohydrate catabolic process                                                   | GO:0016052 | P | 158  | 6.97E-08 | 2.89E-06 |
| 8 | 3594 | F3 vs. M3 | + | Metabolism  | Bioenergetics | carbohydrate derivative biosynthetic process                                     | GO:1901137 | P | 319  | 1.16E-03 | 1.31E-02 |
| 8 | 3595 | F3 vs. M3 | + | Metabolism  | Bioenergetics | carbohydrate derivative metabolic process                                        | GO:1901135 | P | 524  | 6.01E-06 | 1.42E-04 |
| 8 | 3596 | F3 vs. M3 | + | Metabolism  | Bioenergetics | carbohydrate metabolic process                                                   | GO:0005975 | P | 623  | 0.00E+00 | 0.00E+00 |
| 8 | 3597 | F3 vs. M3 | + | Metabolism  | Bioenergetics | cellular carbohydrate biosynthetic process                                       | GO:0034637 | P | 150  | 1.19E-05 | 2.58E-04 |
| 8 | 3598 | F3 vs. M3 | + | Metabolism  | Bioenergetics | cellular carbohydrate catabolic process                                          | GO:0044275 | P | 36   | 3.62E-03 | 3.24E-02 |
| 8 | 3599 | F3 vs. M3 | + | Metabolism  | Bioenergetics | cellular carbohydrate metabolic process                                          | GO:0044262 | P | 263  | 5.89E-09 | 3.06E-07 |
| 8 | 3600 | F3 vs. M3 | + | Metabolism  | Bioenergetics | cellular polysaccharide biosynthetic process                                     | GO:0033692 | P | 124  | 7.64E-05 | 1.33E-03 |
| 8 | 3601 | F3 vs. M3 | + | Metabolism  | Bioenergetics | cellular polysaccharide metabolic process                                        | GO:0044264 | P | 181  | 1.54E-05 | 3.27E-04 |
| 8 | 3602 | F3 vs. M3 | + | Metabolism  | Bioenergetics | cellular respiration                                                             | GO:0045333 | P | 90   | 3.20E-07 | 1.07E-05 |
| 8 | 3603 | F3 vs. M3 | + | Metabolism  | Bioenergetics | CoA-ligase activity                                                              | GO:0016405 | F | 23   | 7.26E-05 | 2.90E-03 |
| 8 | 3604 | F3 vs. M3 | + | Metabolism  | Bioenergetics | electron transfer activity                                                       | GO:0009055 | F | 100  | 1.56E-03 | 3.30E-02 |

|   |      |           |   |            |               |                                                                     |            |   |     |          |          |
|---|------|-----------|---|------------|---------------|---------------------------------------------------------------------|------------|---|-----|----------|----------|
| 8 | 3605 | F3 vs. M3 | + | Metabolism | Bioenergetics | electron transport chain                                            | GO:0022900 | P | 84  | 1.83E-06 | 5.15E-05 |
| 8 | 3606 | F3 vs. M3 | + | Metabolism | Bioenergetics | energy derivation by oxidation of organic compounds                 | GO:0015980 | P | 101 | 5.99E-06 | 1.43E-04 |
| 8 | 3607 | F3 vs. M3 | + | Metabolism | Bioenergetics | fatty acid biosynthetic process                                     | GO:0006633 | P | 98  | 1.08E-04 | 1.81E-03 |
| 8 | 3608 | F3 vs. M3 | + | Metabolism | Bioenergetics | fatty acid derivative biosynthetic process                          | GO:1901570 | P | 22  | 5.65E-03 | 4.53E-02 |
| 8 | 3609 | F3 vs. M3 | + | Metabolism | Bioenergetics | fatty acid derivative metabolic process                             | GO:1901568 | P | 30  | 2.44E-03 | 2.39E-02 |
| 8 | 3610 | F3 vs. M3 | + | Metabolism | Bioenergetics | fatty acid ligase activity                                          | GO:0015645 | F | 13  | 8.52E-04 | 2.06E-02 |
| 8 | 3611 | F3 vs. M3 | + | Metabolism | Bioenergetics | fatty acid metabolic process                                        | GO:0006631 | P | 168 | 1.06E-07 | 4.19E-06 |
| 8 | 3612 | F3 vs. M3 | + | Metabolism | Bioenergetics | generation of precursor metabolites and energy                      | GO:0006091 | P | 275 | 5.00E-15 | 1.16E-12 |
| 8 | 3613 | F3 vs. M3 | + | Metabolism | Bioenergetics | gluconeogenesis                                                     | GO:0006094 | P | 21  | 7.02E-06 | 1.63E-04 |
| 8 | 3614 | F3 vs. M3 | + | Metabolism | Bioenergetics | glucose 6-phosphate metabolic process                               | GO:0051156 | P | 38  | 8.51E-04 | 1.01E-02 |
| 8 | 3615 | F3 vs. M3 | + | Metabolism | Bioenergetics | glucose metabolic process                                           | GO:0006006 | P | 35  | 2.24E-04 | 3.32E-03 |
| 8 | 3616 | F3 vs. M3 | + | Metabolism | Bioenergetics | hexose biosynthetic process                                         | GO:0019319 | P | 23  | 5.37E-06 | 1.31E-04 |
| 8 | 3617 | F3 vs. M3 | + | Metabolism | Bioenergetics | hexose metabolic process                                            | GO:0019318 | P | 73  | 2.60E-04 | 3.81E-03 |
| 8 | 3618 | F3 vs. M3 | + | Metabolism | Bioenergetics | isocitrate metabolic process                                        | GO:0006102 | P | 11  | 2.47E-03 | 2.41E-02 |
| 8 | 3619 | F3 vs. M3 | + | Metabolism | Bioenergetics | medium-chain fatty acid-CoA ligase activity                         | GO:0031956 | F | 12  | 2.44E-03 | 4.71E-02 |
| 8 | 3620 | F3 vs. M3 | + | Metabolism | Bioenergetics | mitochondrial envelope                                              | GO:0005740 | C | 205 | 8.52E-04 | 6.76E-03 |
| 8 | 3621 | F3 vs. M3 | + | Metabolism | Bioenergetics | mitochondrial inner membrane                                        | GO:0005743 | C | 163 | 2.48E-03 | 1.67E-02 |
| 8 | 3622 | F3 vs. M3 | + | Metabolism | Bioenergetics | mitochondrial membrane                                              | GO:0031966 | C | 192 | 7.82E-03 | 4.36E-02 |
| 8 | 3623 | F3 vs. M3 | + | Metabolism | Bioenergetics | mitochondrial respirasome                                           | GO:0005746 | C | 75  | 1.38E-04 | 1.32E-03 |
| 8 | 3624 | F3 vs. M3 | + | Metabolism | Bioenergetics | monosaccharide biosynthetic process                                 | GO:0046364 | P | 37  | 7.94E-08 | 3.22E-06 |
| 8 | 3625 | F3 vs. M3 | + | Metabolism | Bioenergetics | NAD binding                                                         | GO:0051287 | F | 61  | 4.01E-05 | 1.83E-03 |
| 8 | 3626 | F3 vs. M3 | + | Metabolism | Bioenergetics | NAD(P)H dehydrogenase complex assembly                              | GO:0010275 | P | 6   | 1.87E-03 | 1.92E-02 |
| 8 | 3627 | F3 vs. M3 | + | Metabolism | Bioenergetics | NADH dehydrogenase complex                                          | GO:0030964 | C | 47  | 2.44E-03 | 1.67E-02 |
| 8 | 3628 | F3 vs. M3 | + | Metabolism | Bioenergetics | NADP metabolic process                                              | GO:0006739 | P | 39  | 5.63E-05 | 1.01E-03 |
| 8 | 3629 | F3 vs. M3 | + | Metabolism | Bioenergetics | NADPH regeneration                                                  | GO:0006740 | P | 32  | 2.93E-04 | 4.17E-03 |
| 8 | 3630 | F3 vs. M3 | + | Metabolism | Bioenergetics | oxidoreductase activity                                             | GO:0016491 | F | 910 | 0.00E+00 | 0.00E+00 |
| 8 | 3631 | F3 vs. M3 | + | Metabolism | Bioenergetics | oxidoreductase activity, acting on a sulfur group of donors         | GO:0016667 | F | 70  | 4.81E-05 | 2.10E-03 |
| 8 | 3632 | F3 vs. M3 | + | Metabolism | Bioenergetics | oxidoreductase activity, acting on CH-OH group of donors            | GO:0016614 | F | 142 | 4.26E-07 | 3.96E-05 |
| 8 | 3633 | F3 vs. M3 | + | Metabolism | Bioenergetics | oxidoreductase activity, acting on NAD(P)H                          | GO:0016651 | F | 78  | 1.06E-05 | 6.36E-04 |
|   |      |           |   |            |               | oxidoreductase activity, acting on single donors with incorporation |            |   |     |          |          |
| 8 | 3634 | F3 vs. M3 | + | Metabolism | Bioenergetics | of molecular oxygen                                                 | GO:0016701 | F | 28  | 1.78E-04 | 6.04E-03 |
|   |      |           |   |            |               | oxidoreductase activity, acting on the aldehyde or oxo group of     |            |   |     |          |          |
| 8 | 3635 | F3 vs. M3 | + | Metabolism | Bioenergetics | donors                                                              | GO:0016903 | F | 49  | 3.71E-05 | 1.78E-03 |
|   |      |           |   |            |               | oxidoreductase activity, acting on the aldehyde or oxo group of     |            |   |     |          |          |
| 8 | 3636 | F3 vs. M3 | + | Metabolism | Bioenergetics | donors, NAD or NADP as acceptor                                     | GO:0016620 | F | 32  | 3.97E-05 | 1.84E-03 |
|   |      |           |   |            |               | oxidoreductase activity, acting on the CH-OH group of donors,       |            |   |     |          |          |
| 8 | 3637 | F3 vs. M3 | + | Metabolism | Bioenergetics | NAD or NADP as acceptor                                             | GO:0016616 | F | 122 | 1.45E-06 | 1.13E-04 |
| 8 | 3638 | F3 vs. M3 | + | Metabolism | Bioenergetics | oxidoreductase complex                                              | GO:1990204 | C | 115 | 4.62E-09 | 9.56E-08 |
| 8 | 3639 | F3 vs. M3 | + | Metabolism | Bioenergetics | pentose-phosphate shunt                                             | GO:0006098 | P | 30  | 1.05E-04 | 1.75E-03 |
| 8 | 3640 | F3 vs. M3 | + | Metabolism | Bioenergetics | photorespiration                                                    | GO:0009853 | P | 33  | 3.64E-05 | 6.96E-04 |
| 8 | 3641 | F3 vs. M3 | + | Metabolism | Bioenergetics | polysaccharide biosynthetic process                                 | GO:0000271 | P | 145 | 1.42E-05 | 3.06E-04 |
| 8 | 3642 | F3 vs. M3 | + | Metabolism | Bioenergetics | polysaccharide metabolic process                                    | GO:0005976 | P | 274 | 1.41E-10 | 1.03E-08 |
| 8 | 3643 | F3 vs. M3 | + | Metabolism | Bioenergetics | proton transmembrane transport                                      | GO:1902600 | P | 67  | 1.31E-04 | 2.09E-03 |
| 8 | 3644 | F3 vs. M3 | + | Metabolism | Bioenergetics | proton-exporting ATPase activity, phosphorylative mechanism         | GO:0008553 | F | 17  | 2.58E-03 | 4.88E-02 |
| 8 | 3645 | F3 vs. M3 | + | Metabolism | Bioenergetics | proton-transporting ATPase activity, rotational mechanism           | GO:0046961 | F | 20  | 9.93E-04 | 2.28E-02 |
| 8 | 3646 | F3 vs. M3 | + | Metabolism | Bioenergetics | proton-transporting two-sector ATPase complex                       | GO:0016469 | C | 47  | 7.97E-04 | 6.38E-03 |
| 8 | 3647 | F3 vs. M3 | + | Metabolism | Bioenergetics | proton-transporting V-type ATPase complex                           | GO:0033176 | C | 19  | 1.19E-04 | 1.16E-03 |
|   |      |           |   |            |               | pyrophosphate hydrolysis-driven proton transmembrane                |            |   |     |          |          |
| 8 | 3648 | F3 vs. M3 | + | Metabolism | Bioenergetics | transporter activity                                                | GO:0009678 | F | 36  | 1.20E-05 | 6.93E-04 |
| 8 | 3649 | F3 vs. M3 | + | Metabolism | Bioenergetics | pyruvate metabolic process                                          | GO:0006090 | P | 65  | 2.25E-03 | 2.25E-02 |
| 8 | 3650 | F3 vs. M3 | + | Metabolism | Bioenergetics | reductive pentose-phosphate cycle                                   | GO:0019253 | P | 14  | 4.54E-06 | 1.14E-04 |
| 8 | 3651 | F3 vs. M3 | + | Metabolism | Bioenergetics | respirasome                                                         | GO:0070469 | C | 78  | 3.09E-05 | 3.27E-04 |
| 8 | 3652 | F3 vs. M3 | + | Metabolism | Bioenergetics | respiratory chain complex                                           | GO:0098803 | C | 74  | 8.82E-05 | 8.93E-04 |
| 8 | 3653 | F3 vs. M3 | + | Metabolism | Bioenergetics | respiratory chain complex I                                         | GO:0045271 | C | 46  | 2.75E-03 | 1.80E-02 |
| 8 | 3654 | F3 vs. M3 | + | Metabolism | Bioenergetics | respiratory electron transport chain                                | GO:0022904 | P | 37  | 2.20E-04 | 3.27E-03 |
| 8 | 3655 | F3 vs. M3 | + | Metabolism | Bioenergetics | sucrose metabolic process                                           | GO:0005985 | P | 37  | 3.04E-04 | 4.28E-03 |
| 8 | 3656 | F3 vs. M3 | + | Metabolism | Bioenergetics | sugar-phosphatase activity                                          | GO:0050308 | F | 12  | 2.35E-03 | 4.59E-02 |
| 8 | 3657 | F3 vs. M3 | + | Metabolism | Bioenergetics | tricarboxylic acid cycle                                            | GO:0006099 | P | 34  | 8.04E-05 | 1.39E-03 |
| 8 | 3658 | F3 vs. M3 | + | Metabolism | Bioenergetics | tricarboxylic acid metabolic process                                | GO:0072350 | P | 17  | 5.99E-04 | 7.70E-03 |
| 8 | 3659 | F3 vs. M3 | + | Metabolism | Bioenergetics | vacuolar proton-transporting V-type ATPase complex                  | GO:0016471 | C | 8   | 9.32E-04 | 7.17E-03 |
| 8 | 3660 | F3 vs. M3 | + | Metabolism | Catabolism    | alcohol catabolic process                                           | GO:0046164 | P | 27  | 1.19E-04 | 1.93E-03 |
| 8 | 3661 | F3 vs. M3 | + | Metabolism | Catabolism    | alpha-amino acid catabolic process                                  | GO:1901606 | P | 71  | 1.92E-10 | 1.38E-08 |
| 8 | 3662 | F3 vs. M3 | + | Metabolism | Catabolism    | aromatic amino acid family catabolic process                        | GO:0009074 | P | 18  | 5.31E-05 | 9.65E-04 |
| 8 | 3663 | F3 vs. M3 | + | Metabolism | Catabolism    | carbonate dehydratase activity                                      | GO:0004089 | F | 13  | 8.15E-04 | 1.99E-02 |

|   |      |           |   |            |            |                                                                               |            |   |      |          |          |
|---|------|-----------|---|------------|------------|-------------------------------------------------------------------------------|------------|---|------|----------|----------|
| 8 | 3664 | F3 vs. M3 | + | Metabolism | Catabolism | carboxylic acid catabolic process                                             | GO:0046395 | P | 129  | 1.04E-11 | 9.32E-10 |
| 8 | 3665 | F3 vs. M3 | + | Metabolism | Catabolism | catabolic process                                                             | GO:0009056 | P | 942  | 3.70E-09 | 2.03E-07 |
| 8 | 3666 | F3 vs. M3 | + | Metabolism | Catabolism | cell wall macromolecule catabolic process                                     | GO:0016998 | P | 18   | 1.54E-03 | 1.65E-02 |
| 8 | 3667 | F3 vs. M3 | + | Metabolism | Catabolism | cellular amino acid catabolic process                                         | GO:0009063 | P | 78   | 2.44E-08 | 1.10E-06 |
| 8 | 3668 | F3 vs. M3 | + | Metabolism | Catabolism | cellular catabolic process                                                    | GO:0044248 | P | 775  | 2.70E-05 | 5.43E-04 |
| 8 | 3669 | F3 vs. M3 | + | Metabolism | Catabolism | cellular lipid catabolic process                                              | GO:0044242 | P | 69   | 9.37E-04 | 1.09E-02 |
| 8 | 3670 | F3 vs. M3 | + | Metabolism | Catabolism | cellular metabolic compound salvage                                           | GO:0043094 | P | 57   | 2.45E-06 | 6.70E-05 |
| 8 | 3671 | F3 vs. M3 | + | Metabolism | Catabolism | erythrose 4-phosphate/phosphoenolpyruvate family amino acid catabolic process | GO:1902222 | P | 11   | 1.53E-04 | 2.39E-03 |
| 8 | 3672 | F3 vs. M3 | + | Metabolism | Catabolism | glycine catabolic process                                                     | GO:0006546 | P | 7    | 6.40E-04 | 8.04E-03 |
| 8 | 3673 | F3 vs. M3 | + | Metabolism | Catabolism | lipid catabolic process                                                       | GO:0016042 | P | 74   | 1.23E-03 | 1.35E-02 |
| 8 | 3674 | F3 vs. M3 | + | Metabolism | Catabolism | L-phenylalanine catabolic process                                             | GO:0006559 | P | 11   | 1.53E-04 | 2.39E-03 |
| 8 | 3675 | F3 vs. M3 | + | Metabolism | Catabolism | monocarboxylic acid catabolic process                                         | GO:0072329 | P | 49   | 2.75E-05 | 5.49E-04 |
| 8 | 3676 | F3 vs. M3 | + | Metabolism | Catabolism | organic acid catabolic process                                                | GO:0006054 | P | 129  | 1.04E-11 | 9.47E-10 |
| 8 | 3677 | F3 vs. M3 | + | Metabolism | Catabolism | organic hydroxy compound catabolic process                                    | GO:1901616 | P | 35   | 1.37E-06 | 3.96E-05 |
| 8 | 3678 | F3 vs. M3 | + | Metabolism | Catabolism | organic substance catabolic process                                           | GO:1901575 | P | 867  | 1.55E-07 | 5.82E-06 |
| 8 | 3679 | F3 vs. M3 | + | Metabolism | Catabolism | pectin catabolic process                                                      | GO:0045490 | P | 61   | 6.90E-05 | 1.22E-03 |
| 8 | 3680 | F3 vs. M3 | + | Metabolism | Catabolism | peroxisome                                                                    | GO:0005777 | C | 204  | 1.73E-06 | 2.20E-05 |
| 8 | 3681 | F3 vs. M3 | + | Metabolism | Catabolism | phenol-containing compound catabolic process                                  | GO:0019336 | P | 6    | 4.46E-03 | 3.78E-02 |
| 8 | 3682 | F3 vs. M3 | + | Metabolism | Catabolism | polyol catabolic process                                                      | GO:0046174 | P | 20   | 6.05E-04 | 7.74E-03 |
| 8 | 3683 | F3 vs. M3 | + | Metabolism | Catabolism | polysaccharide catabolic process                                              | GO:0000272 | P | 90   | 1.76E-05 | 3.64E-04 |
| 8 | 3684 | F3 vs. M3 | + | Metabolism | Catabolism | serine family amino acid catabolic process                                    | GO:0009071 | P | 13   | 9.42E-05 | 1.59E-03 |
| 8 | 3685 | F3 vs. M3 | + | Metabolism | Catabolism | small molecule catabolic process                                              | GO:0044282 | P | 188  | 3.62E-12 | 3.94E-10 |
| 8 | 3686 | F3 vs. M3 | + | Metabolism | Metabolism | acid-ammonia (or amide) ligase activity                                       | GO:0016880 | F | 8    | 6.21E-04 | 1.62E-02 |
| 8 | 3687 | F3 vs. M3 | + | Metabolism | Metabolism | acid-thiol ligase activity                                                    | GO:0016878 | F | 27   | 9.51E-05 | 3.70E-03 |
| 8 | 3688 | F3 vs. M3 | + | Metabolism | Metabolism | actin binding                                                                 | GO:0003779 | F | 76   | 3.76E-05 | 1.77E-03 |
| 8 | 3689 | F3 vs. M3 | + | Metabolism | Metabolism | actin filament binding                                                        | GO:0051015 | F | 50   | 2.30E-05 | 1.22E-03 |
| 8 | 3690 | F3 vs. M3 | + | Metabolism | Metabolism | actin filament bundle assembly                                                | GO:0051017 | P | 12   | 2.42E-03 | 2.38E-02 |
| 8 | 3691 | F3 vs. M3 | + | Metabolism | Metabolism | actin filament bundle organization                                            | GO:0061572 | P | 12   | 2.42E-03 | 2.38E-02 |
| 8 | 3692 | F3 vs. M3 | + | Metabolism | Metabolism | actin filament depolymerization                                               | GO:0030042 | P | 9    | 5.45E-03 | 4.44E-02 |
| 8 | 3693 | F3 vs. M3 | + | Metabolism | Metabolism | actin filament organization                                                   | GO:0007015 | P | 60   | 9.05E-04 | 1.06E-02 |
| 8 | 3694 | F3 vs. M3 | + | Metabolism | Metabolism | actin filament-based process                                                  | GO:0030029 | P | 74   | 1.07E-03 | 1.23E-02 |
| 8 | 3695 | F3 vs. M3 | + | Metabolism | Metabolism | alcohol metabolic process                                                     | GO:0006066 | P | 86   | 1.03E-05 | 2.26E-04 |
| 8 | 3696 | F3 vs. M3 | + | Metabolism | Metabolism | alpha-amino acid biosynthetic process                                         | GO:1901607 | P | 119  | 4.92E-06 | 1.21E-04 |
| 8 | 3697 | F3 vs. M3 | + | Metabolism | Metabolism | alpha-amino acid metabolic process                                            | GO:1901605 | P | 197  | 4.76E-14 | 9.45E-12 |
| 8 | 3698 | F3 vs. M3 | + | Metabolism | Metabolism | amine biosynthetic process                                                    | GO:0009309 | P | 26   | 1.47E-03 | 1.59E-02 |
| 8 | 3699 | F3 vs. M3 | + | Metabolism | Metabolism | amine metabolic process                                                       | GO:0009308 | P | 67   | 6.64E-04 | 8.32E-03 |
| 8 | 3700 | F3 vs. M3 | + | Metabolism | Metabolism | aminoglycan biosynthetic process                                              | GO:0006023 | P | 4    | 5.31E-03 | 4.35E-02 |
| 8 | 3701 | F3 vs. M3 | + | Metabolism | Metabolism | ammonia assimilation cycle                                                    | GO:0019676 | P | 6    | 7.38E-04 | 9.03E-03 |
| 8 | 3702 | F3 vs. M3 | + | Metabolism | Metabolism | ammonia ligase activity                                                       | GO:0016211 | F | 8    | 6.21E-04 | 1.64E-02 |
| 8 | 3703 | F3 vs. M3 | + | Metabolism | Metabolism | anchoring junction                                                            | GO:0070161 | C | 654  | 7.73E-03 | 4.38E-02 |
| 8 | 3704 | F3 vs. M3 | + | Metabolism | Metabolism | anion binding                                                                 | GO:0043168 | F | 820  | 1.09E-05 | 6.41E-04 |
| 8 | 3705 | F3 vs. M3 | + | Metabolism | Metabolism | aromatic amino acid family metabolic process                                  | GO:0009072 | P | 56   | 1.18E-04 | 1.92E-03 |
| 8 | 3706 | F3 vs. M3 | + | Metabolism | Metabolism | aspartate family amino acid metabolic process                                 | GO:0009066 | P | 41   | 1.98E-03 | 2.00E-02 |
| 8 | 3707 | F3 vs. M3 | + | Metabolism | Metabolism | benzene-containing compound metabolic process                                 | GO:0042537 | P | 43   | 9.76E-04 | 1.13E-02 |
| 8 | 3708 | F3 vs. M3 | + | Metabolism | Metabolism | beta-galactosidase activity                                                   | GO:0004565 | F | 13   | 9.88E-04 | 2.29E-02 |
| 8 | 3709 | F3 vs. M3 | + | Metabolism | Metabolism | beta-glucan biosynthetic process                                              | GO:0051274 | P | 46   | 1.16E-03 | 1.31E-02 |
| 8 | 3710 | F3 vs. M3 | + | Metabolism | Metabolism | beta-glucan metabolic process                                                 | GO:0051273 | P | 50   | 2.64E-03 | 2.51E-02 |
| 8 | 3711 | F3 vs. M3 | + | Metabolism | Metabolism | biosynthetic process                                                          | GO:0009058 | P | 1855 | 1.92E-07 | 6.88E-06 |
| 8 | 3712 | F3 vs. M3 | + | Metabolism | Metabolism | branched-chain amino acid biosynthetic process                                | GO:0009082 | P | 18   | 1.80E-03 | 1.85E-02 |
| 8 | 3713 | F3 vs. M3 | + | Metabolism | Metabolism | carbon utilization                                                            | GO:0015976 | P | 8    | 4.37E-05 | 8.19E-04 |
| 8 | 3714 | F3 vs. M3 | + | Metabolism | Metabolism | carbon-carbon lyase activity                                                  | GO:0016830 | F | 76   | 1.62E-06 | 1.20E-04 |
| 8 | 3715 | F3 vs. M3 | + | Metabolism | Metabolism | carbon-oxygen lyase activity                                                  | GO:0016835 | F | 99   | 1.65E-04 | 5.64E-03 |
| 8 | 3716 | F3 vs. M3 | + | Metabolism | Metabolism | carboxylic acid biosynthetic process                                          | GO:0046394 | P | 323  | 4.08E-13 | 7.09E-11 |
| 8 | 3717 | F3 vs. M3 | + | Metabolism | Metabolism | carboxylic acid metabolic process                                             | GO:0019752 | P | 652  | 0.00E+00 | 0.00E+00 |
| 8 | 3718 | F3 vs. M3 | + | Metabolism | Metabolism | carboxy-lyase activity                                                        | GO:0016831 | F | 43   | 1.55E-04 | 5.49E-03 |
| 8 | 3719 | F3 vs. M3 | + | Metabolism | Metabolism | catalytic activity                                                            | GO:0003824 | F | 5104 | 0.00E+00 | 0.00E+00 |
| 8 | 3720 | F3 vs. M3 | + | Metabolism | Metabolism | cation binding                                                                | GO:0043169 | F | 1013 | 2.69E-09 | 4.29E-07 |
| 8 | 3721 | F3 vs. M3 | + | Metabolism | Metabolism | cell wall macromolecule metabolic process                                     | GO:0044036 | P | 109  | 1.95E-03 | 1.98E-02 |
| 8 | 3722 | F3 vs. M3 | + | Metabolism | Metabolism | cell wall polysaccharide metabolic process                                    | GO:0010383 | P | 89   | 2.77E-03 | 2.62E-02 |
| 8 | 3723 | F3 vs. M3 | + | Metabolism | Metabolism | cellular amine metabolic process                                              | GO:0044106 | P | 42   | 1.10E-04 | 1.83E-03 |
| 8 | 3724 | F3 vs. M3 | + | Metabolism | Metabolism | cellular amino acid biosynthetic process                                      | GO:0008652 | P | 134  | 3.58E-07 | 1.17E-05 |
| 8 | 3725 | F3 vs. M3 | + | Metabolism | Metabolism | cellular amino acid metabolic process                                         | GO:0006520 | P | 266  | 1.30E-12 | 1.64E-10 |
| 8 | 3726 | F3 vs. M3 | + | Metabolism | Metabolism | cellular biogenic amine biosynthetic process                                  | GO:0042401 | P | 26   | 1.47E-03 | 1.58E-02 |



|   |      |           |   |            |            |                                                                               |            |   |      |          |          |
|---|------|-----------|---|------------|------------|-------------------------------------------------------------------------------|------------|---|------|----------|----------|
| 8 | 3727 | F3 vs. M3 | + | Metabolism | Metabolism | cellular biogenic amine metabolic process                                     | GO:0006576 | P | 42   | 1.10E-04 | 1.83E-03 |
| 8 | 3728 | F3 vs. M3 | + | Metabolism | Metabolism | cellular biosynthetic process                                                 | GO:0044249 | P | 1701 | 6.90E-05 | 1.22E-03 |
| 8 | 3729 | F3 vs. M3 | + | Metabolism | Metabolism | cellular glucan metabolic process                                             | GO:0006073 | P | 137  | 8.78E-04 | 1.03E-02 |
| 8 | 3730 | F3 vs. M3 | + | Metabolism | Metabolism | cellular ketone metabolic process                                             | GO:0042180 | P | 47   | 3.73E-03 | 3.28E-02 |
| 8 | 3731 | F3 vs. M3 | + | Metabolism | Metabolism | cellular lipid metabolic process                                              | GO:0044255 | P | 461  | 7.85E-13 | 1.21E-10 |
| 8 | 3732 | F3 vs. M3 | + | Metabolism | Metabolism | cellulose biosynthetic process                                                | GO:0030244 | P | 36   | 3.57E-04 | 4.90E-03 |
| 8 | 3733 | F3 vs. M3 | + | Metabolism | Metabolism | cellulose metabolic process                                                   | GO:0030243 | P | 40   | 1.10E-03 | 1.25E-02 |
| 8 | 3734 | F3 vs. M3 | + | Metabolism | Metabolism | cellulose synthase (UDP-forming) activity                                     | GO:0016760 | F | 20   | 3.36E-04 | 1.02E-02 |
| 8 | 3735 | F3 vs. M3 | + | Metabolism | Metabolism | cellulose synthase activity                                                   | GO:0016759 | F | 29   | 3.83E-04 | 1.14E-02 |
| 8 | 3736 | F3 vs. M3 | + | Metabolism | Metabolism | cinnamic acid metabolic process                                               | GO:0009803 | P | 4    | 4.75E-03 | 3.99E-02 |
| 8 | 3737 | F3 vs. M3 | + | Metabolism | Metabolism | copper ion binding                                                            | GO:0005507 | F | 138  | 7.88E-11 | 1.89E-08 |
| 8 | 3738 | F3 vs. M3 | + | Metabolism | Metabolism | coumarin biosynthetic process                                                 | GO:0009805 | P | 4    | 2.47E-03 | 2.41E-02 |
| 8 | 3739 | F3 vs. M3 | + | Metabolism | Metabolism | coumarin metabolic process                                                    | GO:0009804 | P | 6    | 4.58E-04 | 6.07E-03 |
| 8 | 3740 | F3 vs. M3 | + | Metabolism | Metabolism | dicarboxylic acid metabolic process                                           | GO:0043648 | P | 68   | 1.98E-06 | 5.49E-05 |
| 8 | 3741 | F3 vs. M3 | + | Metabolism | Metabolism | erythrose 4-phosphate/phosphoenolpyruvate family amino acid metabolic process | GO:1902221 | P | 20   | 1.78E-04 | 2.72E-03 |
| 8 | 3742 | F3 vs. M3 | + | Metabolism | Metabolism | establishment of localization                                                 | GO:0051234 | P | 1410 | 1.92E-09 | 1.12E-07 |
| 8 | 3743 | F3 vs. M3 | + | Metabolism | Metabolism | galactosidase activity                                                        | GO:0015925 | F | 18   | 2.09E-03 | 4.21E-02 |
| 8 | 3744 | F3 vs. M3 | + | Metabolism | Metabolism | galacturonan metabolic process                                                | GO:0010393 | P | 103  | 9.37E-09 | 4.57E-07 |
| 8 | 3745 | F3 vs. M3 | + | Metabolism | Metabolism | glucan biosynthetic process                                                   | GO:0009250 | P | 85   | 2.18E-03 | 2.18E-02 |
| 8 | 3746 | F3 vs. M3 | + | Metabolism | Metabolism | glucan metabolic process                                                      | GO:0044042 | P | 143  | 5.76E-04 | 7.43E-03 |
| 8 | 3747 | F3 vs. M3 | + | Metabolism | Metabolism | glucosinolate biosynthetic process                                            | GO:0019761 | P | 31   | 4.67E-04 | 6.17E-03 |
| 8 | 3748 | F3 vs. M3 | + | Metabolism | Metabolism | glucosyltransferase activity                                                  | GO:0046527 | F | 134  | 1.42E-04 | 5.24E-03 |
| 8 | 3749 | F3 vs. M3 | + | Metabolism | Metabolism | glutamate metabolic process                                                   | GO:0006536 | P | 23   | 1.57E-03 | 1.67E-02 |
| 8 | 3750 | F3 vs. M3 | + | Metabolism | Metabolism | glutamine family amino acid metabolic process                                 | GO:0009064 | P | 46   | 2.04E-04 | 3.06E-03 |
| 8 | 3751 | F3 vs. M3 | + | Metabolism | Metabolism | glutamine metabolic process                                                   | GO:0006541 | P | 15   | 4.53E-04 | 6.02E-03 |
| 8 | 3752 | F3 vs. M3 | + | Metabolism | Metabolism | glycerolipid metabolic process                                                | GO:0046486 | P | 120  | 2.47E-04 | 3.65E-03 |
| 8 | 3753 | F3 vs. M3 | + | Metabolism | Metabolism | glycerophospholipid metabolic process                                         | GO:0006650 | P | 100  | 1.26E-04 | 2.02E-03 |
| 8 | 3754 | F3 vs. M3 | + | Metabolism | Metabolism | glycine cleavage complex                                                      | GO:0005960 | C | 5    | 7.07E-03 | 4.15E-02 |
| 8 | 3755 | F3 vs. M3 | + | Metabolism | Metabolism | glycine decarboxylation via glycine cleavage system                           | GO:0019464 | P | 6    | 2.33E-03 | 2.31E-02 |
| 8 | 3756 | F3 vs. M3 | + | Metabolism | Metabolism | glycine metabolic process                                                     | GO:0006544 | P | 15   | 1.93E-05 | 3.98E-04 |
| 8 | 3757 | F3 vs. M3 | + | Metabolism | Metabolism | glycosaminoglycan biosynthetic process                                        | GO:0006024 | P | 4    | 5.31E-03 | 4.35E-02 |
| 8 | 3758 | F3 vs. M3 | + | Metabolism | Metabolism | glycosaminoglycan metabolic process                                           | GO:0030203 | P | 4    | 5.31E-03 | 4.37E-02 |
| 8 | 3759 | F3 vs. M3 | + | Metabolism | Metabolism | glucosinolate biosynthetic process                                            | GO:0019758 | P | 31   | 4.67E-04 | 6.15E-03 |
| 8 | 3760 | F3 vs. M3 | + | Metabolism | Metabolism | glycosyl compound biosynthetic process                                        | GO:1901659 | P | 48   | 7.39E-04 | 9.03E-03 |
| 8 | 3761 | F3 vs. M3 | + | Metabolism | Metabolism | hydrolase activity                                                            | GO:0016787 | F | 1809 | 1.64E-04 | 5.69E-03 |
| 8 | 3762 | F3 vs. M3 | + | Metabolism | Metabolism | hydrolase activity, hydrolyzing O-glycosyl compounds                          | GO:0004553 | F | 233  | 1.31E-04 | 4.90E-03 |
| 8 | 3763 | F3 vs. M3 | + | Metabolism | Metabolism | hydro-lyase activity                                                          | GO:0016836 | F | 61   | 9.40E-04 | 2.22E-02 |
| 8 | 3764 | F3 vs. M3 | + | Metabolism | Metabolism | indole-containing compound metabolic process                                  | GO:0042430 | P | 47   | 1.34E-03 | 1.46E-02 |
| 8 | 3765 | F3 vs. M3 | + | Metabolism | Metabolism | inorganic diphosphatase activity                                              | GO:0004427 | F | 10   | 2.12E-04 | 6.93E-03 |
| 8 | 3766 | F3 vs. M3 | + | Metabolism | Metabolism | ion binding                                                                   | GO:0043167 | F | 1724 | 7.58E-11 | 1.98E-08 |
| 8 | 3767 | F3 vs. M3 | + | Metabolism | Metabolism | leucine biosynthetic process                                                  | GO:0009098 | P | 12   | 3.72E-03 | 3.28E-02 |
| 8 | 3768 | F3 vs. M3 | + | Metabolism | Metabolism | leucine metabolic process                                                     | GO:0006551 | P | 19   | 7.93E-04 | 9.52E-03 |
| 8 | 3769 | F3 vs. M3 | + | Metabolism | Metabolism | lignin biosynthetic process                                                   | GO:0009809 | P | 30   | 4.54E-06 | 1.14E-04 |
| 8 | 3770 | F3 vs. M3 | + | Metabolism | Metabolism | lignin metabolic process                                                      | GO:0009808 | P | 38   | 5.19E-07 | 1.66E-05 |
| 8 | 3771 | F3 vs. M3 | + | Metabolism | Metabolism | lipid biosynthetic process                                                    | GO:0008610 | P | 339  | 6.79E-06 | 1.58E-04 |
| 8 | 3772 | F3 vs. M3 | + | Metabolism | Metabolism | lipid metabolic process                                                       | GO:0006629 | P | 548  | 4.11E-12 | 4.15E-10 |
| 8 | 3773 | F3 vs. M3 | + | Metabolism | Metabolism | lipid modification                                                            | GO:0030258 | P | 77   | 6.57E-06 | 1.55E-04 |
| 8 | 3774 | F3 vs. M3 | + | Metabolism | Metabolism | localization                                                                  | GO:0051179 | P | 1507 | 3.20E-08 | 1.42E-06 |
| 8 | 3775 | F3 vs. M3 | + | Metabolism | Metabolism | L-phenylalanine metabolic process                                             | GO:0006558 | P | 20   | 1.78E-04 | 2.73E-03 |
| 8 | 3776 | F3 vs. M3 | + | Metabolism | Metabolism | lyase activity                                                                | GO:0016829 | F | 214  | 2.00E-10 | 3.83E-08 |
| 8 | 3777 | F3 vs. M3 | + | Metabolism | Metabolism | membrane lipid biosynthetic process                                           | GO:0046467 | P | 57   | 5.49E-03 | 4.43E-02 |
| 8 | 3778 | F3 vs. M3 | + | Metabolism | Metabolism | membrane lipid metabolic process                                              | GO:0006643 | P | 67   | 6.68E-04 | 8.34E-03 |
| 8 | 3779 | F3 vs. M3 | + | Metabolism | Metabolism | metabolic process                                                             | GO:0008152 | P | 5391 | 1.93E-04 | 2.94E-03 |
| 8 | 3780 | F3 vs. M3 | + | Metabolism | Metabolism | metal ion binding                                                             | GO:0046872 | F | 994  | 6.56E-09 | 8.57E-07 |
| 8 | 3781 | F3 vs. M3 | + | Metabolism | Metabolism | methionine adenosyltransferase activity                                       | GO:0004478 | F | 4    | 1.66E-03 | 3.49E-02 |
| 8 | 3782 | F3 vs. M3 | + | Metabolism | Metabolism | methionine metabolic process                                                  | GO:0006555 | P | 16   | 4.25E-03 | 3.61E-02 |
| 8 | 3783 | F3 vs. M3 | + | Metabolism | Metabolism | monocarboxylic acid biosynthetic process                                      | GO:0072330 | P | 156  | 8.51E-06 | 1.93E-04 |
| 8 | 3784 | F3 vs. M3 | + | Metabolism | Metabolism | monocarboxylic acid metabolic process                                         | GO:0032787 | P | 335  | 4.19E-13 | 7.05E-11 |
| 8 | 3785 | F3 vs. M3 | + | Metabolism | Metabolism | monosaccharide metabolic process                                              | GO:0005996 | P | 102  | 5.45E-07 | 1.72E-05 |
| 8 | 3786 | F3 vs. M3 | + | Metabolism | Metabolism | nitrate assimilation                                                          | GO:0042128 | P | 10   | 1.22E-03 | 1.36E-02 |
| 8 | 3787 | F3 vs. M3 | + | Metabolism | Metabolism | nitrate metabolic process                                                     | GO:0042126 | P | 10   | 1.22E-03 | 1.36E-02 |
| 8 | 3788 | F3 vs. M3 | + | Metabolism | Metabolism | nitrogen cycle metabolic process                                              | GO:0071941 | P | 13   | 4.03E-04 | 5.42E-03 |
| 8 | 3789 | F3 vs. M3 | + | Metabolism | Metabolism | nitrogen utilization                                                          | GO:0019740 | P | 6    | 7.38E-04 | 9.05E-03 |

|   |      |           |   |            |            |                                                        |            |   |      |          |          |
|---|------|-----------|---|------------|------------|--------------------------------------------------------|------------|---|------|----------|----------|
| 8 | 3790 | F3 vs. M3 | + | Metabolism | Metabolism | olefinic compound metabolic process                    | GO:0120254 | P | 40   | 4.98E-04 | 6.50E-03 |
| 8 | 3791 | F3 vs. M3 | + | Metabolism | Metabolism | organic acid biosynthetic process                      | GO:0016053 | P | 323  | 4.08E-13 | 7.32E-11 |
| 8 | 3792 | F3 vs. M3 | + | Metabolism | Metabolism | organic acid metabolic process                         | GO:0006082 | P | 724  | 0.00E+00 | 0.00E+00 |
| 8 | 3793 | F3 vs. M3 | + | Metabolism | Metabolism | organic cyclic compound biosynthetic process           | GO:1901362 | P | 591  | 4.17E-03 | 3.56E-02 |
| 8 | 3794 | F3 vs. M3 | + | Metabolism | Metabolism | organic hydroxy compound biosynthetic process          | GO:1901617 | P | 118  | 4.64E-05 | 8.63E-04 |
| 8 | 3795 | F3 vs. M3 | + | Metabolism | Metabolism | organic hydroxy compound metabolic process             | GO:1901615 | P | 207  | 2.31E-08 | 1.06E-06 |
| 8 | 3796 | F3 vs. M3 | + | Metabolism | Metabolism | organic substance biosynthetic process                 | GO:1901576 | P | 1771 | 4.35E-06 | 1.10E-04 |
| 8 | 3797 | F3 vs. M3 | + | Metabolism | Metabolism | organophosphate metabolic process                      | GO:0019637 | P | 404  | 1.21E-07 | 4.72E-06 |
| 8 | 3798 | F3 vs. M3 | + | Metabolism | Metabolism | oxaloacetate decarboxylase activity                    | GO:0008948 | F | 7    | 2.65E-03 | 4.97E-02 |
| 8 | 3799 | F3 vs. M3 | + | Metabolism | Metabolism | oxidation-reduction process                            | GO:0055114 | P | 500  | 0.00E+00 | 0.00E+00 |
| 8 | 3800 | F3 vs. M3 | + | Metabolism | Metabolism | oxoacid metabolic process                              | GO:0043436 | P | 721  | 0.00E+00 | 0.00E+00 |
| 8 | 3801 | F3 vs. M3 | + | Metabolism | Metabolism | oxylipin biosynthetic process                          | GO:0031408 | P | 13   | 1.95E-03 | 1.98E-02 |
| 8 | 3802 | F3 vs. M3 | + | Metabolism | Metabolism | oxylipin metabolic process                             | GO:0031407 | P | 15   | 2.49E-03 | 2.42E-02 |
| 8 | 3803 | F3 vs. M3 | + | Metabolism | Metabolism | pectin biosynthetic process                            | GO:0045489 | P | 34   | 3.89E-03 | 3.36E-02 |
| 8 | 3804 | F3 vs. M3 | + | Metabolism | Metabolism | pectin metabolic process                               | GO:0045488 | P | 102  | 4.18E-09 | 2.25E-07 |
| 8 | 3805 | F3 vs. M3 | + | Metabolism | Metabolism | pectinesterase activity                                | GO:0030599 | F | 50   | 6.16E-04 | 1.64E-02 |
| 8 | 3806 | F3 vs. M3 | + | Metabolism | Metabolism | pectinesterase inhibitor activity                      | GO:0046910 | F | 39   | 1.83E-03 | 3.81E-02 |
| 8 | 3807 | F3 vs. M3 | + | Metabolism | Metabolism | phenylpropanoid biosynthetic process                   | GO:0009699 | P | 55   | 1.68E-07 | 6.22E-06 |
| 8 | 3808 | F3 vs. M3 | + | Metabolism | Metabolism | phenylpropanoid metabolic process                      | GO:0009698 | P | 70   | 4.53E-09 | 2.42E-07 |
| 8 | 3809 | F3 vs. M3 | + | Metabolism | Metabolism | phosphate-containing compound metabolic process        | GO:0006796 | P | 1149 | 5.09E-05 | 9.36E-04 |
| 8 | 3810 | F3 vs. M3 | + | Metabolism | Metabolism | phosphatidylinositol bisphosphate phosphatase activity | GO:0034593 | F | 17   | 2.36E-03 | 4.59E-02 |
| 8 | 3811 | F3 vs. M3 | + | Metabolism | Metabolism | phosphatidylinositol metabolic process                 | GO:0046488 | P | 58   | 1.68E-03 | 1.76E-02 |
| 8 | 3812 | F3 vs. M3 | + | Metabolism | Metabolism | phospholipid metabolic process                         | GO:0006644 | P | 144  | 1.95E-04 | 2.95E-03 |
| 8 | 3813 | F3 vs. M3 | + | Metabolism | Metabolism | phosphoric ester hydrolase activity                    | GO:0042578 | F | 251  | 1.28E-04 | 4.83E-03 |
| 8 | 3814 | F3 vs. M3 | + | Metabolism | Metabolism | phosphorus metabolic process                           | GO:0006793 | P | 1188 | 3.08E-06 | 8.06E-05 |
| 8 | 3815 | F3 vs. M3 | + | Metabolism | Metabolism | pigment biosynthetic process                           | GO:0046148 | P | 83   | 1.94E-04 | 2.95E-03 |
| 8 | 3816 | F3 vs. M3 | + | Metabolism | Metabolism | pigment metabolic process                              | GO:0042440 | P | 97   | 1.75E-05 | 3.65E-04 |
| 8 | 3817 | F3 vs. M3 | + | Metabolism | Metabolism | polyamine biosynthetic process                         | GO:0006596 | P | 12   | 2.04E-03 | 2.06E-02 |
| 8 | 3818 | F3 vs. M3 | + | Metabolism | Metabolism | polyamine metabolic process                            | GO:0006595 | P | 20   | 1.86E-03 | 1.91E-02 |
| 8 | 3819 | F3 vs. M3 | + | Metabolism | Metabolism | polyol metabolic process                               | GO:0019751 | P | 41   | 1.81E-04 | 2.77E-03 |
| 8 | 3820 | F3 vs. M3 | + | Metabolism | Metabolism | porphyrin-containing compound metabolic process        | GO:0006778 | P | 56   | 2.39E-03 | 2.35E-02 |
| 8 | 3821 | F3 vs. M3 | + | Metabolism | Metabolism | purine nucleotide metabolic process                    | GO:0006163 | P | 154  | 8.84E-04 | 1.04E-02 |
| 8 | 3822 | F3 vs. M3 | + | Metabolism | Metabolism | purine ribonucleotide metabolic process                | GO:0009150 | P | 143  | 4.45E-04 | 5.92E-03 |
| 8 | 3823 | F3 vs. M3 | + | Metabolism | Metabolism | purine-containing compound biosynthetic process        | GO:0072522 | P | 87   | 5.63E-03 | 4.53E-02 |
| 8 | 3824 | F3 vs. M3 | + | Metabolism | Metabolism | purine-containing compound metabolic process           | GO:0072521 | P | 170  | 1.05E-03 | 1.20E-02 |
| 8 | 3825 | F3 vs. M3 | + | Metabolism | Metabolism | pyridoxal phosphate binding                            | GO:0030170 | F | 68   | 6.43E-04 | 1.62E-02 |
| 8 | 3826 | F3 vs. M3 | + | Metabolism | Metabolism | quercetin 7-O-glucosyltransferase activity             | GO:0080044 | F | 35   | 2.57E-03 | 4.90E-02 |
| 8 | 3827 | F3 vs. M3 | + | Metabolism | Metabolism | racemase and epimerase activity                        | GO:0016854 | F | 39   | 2.03E-03 | 4.14E-02 |
| 8 | 3828 | F3 vs. M3 | + | Metabolism | Metabolism | S-adenosylmethionine biosynthetic process              | GO:0006556 | P | 4    | 1.66E-03 | 1.75E-02 |
| 8 | 3829 | F3 vs. M3 | + | Metabolism | Metabolism | S-adenosylmethionine metabolic process                 | GO:0046500 | P | 9    | 1.23E-04 | 1.99E-03 |
| 8 | 3830 | F3 vs. M3 | + | Metabolism | Metabolism | secondary alcohol metabolic process                    | GO:1902652 | P | 11   | 2.47E-03 | 2.41E-02 |
| 8 | 3831 | F3 vs. M3 | + | Metabolism | Metabolism | secondary metabolic process                            | GO:0019748 | P | 194  | 4.04E-10 | 2.71E-08 |
| 8 | 3832 | F3 vs. M3 | + | Metabolism | Metabolism | secondary metabolite biosynthetic process              | GO:0044550 | P | 98   | 6.99E-12 | 6.58E-10 |
| 8 | 3833 | F3 vs. M3 | + | Metabolism | Metabolism | serine family amino acid biosynthetic process          | GO:0009070 | P | 29   | 1.47E-03 | 1.58E-02 |
| 8 | 3834 | F3 vs. M3 | + | Metabolism | Metabolism | serine family amino acid metabolic process             | GO:0009069 | P | 41   | 5.71E-06 | 1.38E-04 |
| 8 | 3835 | F3 vs. M3 | + | Metabolism | Metabolism | S-glycoside biosynthetic process                       | GO:0016144 | P | 31   | 4.67E-04 | 6.18E-03 |
| 8 | 3836 | F3 vs. M3 | + | Metabolism | Metabolism | sigma factor activity                                  | GO:0016987 | F | 6    | 1.01E-03 | 2.28E-02 |
| 8 | 3837 | F3 vs. M3 | + | Metabolism | Metabolism | small molecule binding                                 | GO:0036094 | F | 819  | 4.36E-04 | 1.23E-02 |
| 8 | 3838 | F3 vs. M3 | + | Metabolism | Metabolism | small molecule biosynthetic process                    | GO:0044283 | P | 448  | 0.00E+00 | 0.00E+00 |
| 8 | 3839 | F3 vs. M3 | + | Metabolism | Metabolism | small molecule metabolic process                       | GO:0044281 | P | 1071 | 0.00E+00 | 0.00E+00 |
| 8 | 3840 | F3 vs. M3 | + | Metabolism | Metabolism | spermidine biosynthetic process                        | GO:0008295 | P | 4    | 5.63E-03 | 4.52E-02 |
| 8 | 3841 | F3 vs. M3 | + | Metabolism | Metabolism | sphingolipid metabolic process                         | GO:0006665 | P | 30   | 2.90E-03 | 2.68E-02 |
| 8 | 3842 | F3 vs. M3 | + | Metabolism | Metabolism | sulfur amino acid biosynthetic process                 | GO:0000097 | P | 25   | 3.61E-03 | 3.24E-02 |
| 8 | 3843 | F3 vs. M3 | + | Metabolism | Metabolism | sulfur amino acid metabolic process                    | GO:0000096 | P | 37   | 3.78E-04 | 5.10E-03 |
| 8 | 3844 | F3 vs. M3 | + | Metabolism | Metabolism | sulfur compound biosynthetic process                   | GO:0044272 | P | 105  | 8.45E-13 | 1.27E-10 |
| 8 | 3845 | F3 vs. M3 | + | Metabolism | Metabolism | sulfur compound metabolic process                      | GO:0006790 | P | 248  | 3.16E-12 | 3.51E-10 |
| 8 | 3846 | F3 vs. M3 | + | Metabolism | Metabolism | tetrapyrrole metabolic process                         | GO:0033013 | P | 58   | 2.76E-03 | 2.61E-02 |
| 8 | 3847 | F3 vs. M3 | + | Metabolism | Metabolism | thioester biosynthetic process                         | GO:0035384 | P | 18   | 3.37E-03 | 3.05E-02 |
| 8 | 3848 | F3 vs. M3 | + | Metabolism | Metabolism | transferase activity                                   | GO:0016740 | F | 2040 | 4.26E-04 | 1.24E-02 |
| 8 | 3849 | F3 vs. M3 | + | Metabolism | Metabolism | transferase activity, transferring hexosyl groups      | GO:0016758 | F | 244  | 2.56E-04 | 8.28E-03 |
| 8 | 3850 | F3 vs. M3 | + | Metabolism | Metabolism | UDP-glucosyltransferase activity                       | GO:0035251 | F | 101  | 8.78E-05 | 3.46E-03 |
| 8 | 3851 | F3 vs. M3 | + | Metabolism | Metabolism | UDP-glucuronate biosynthetic process                   | GO:0006065 | P | 4    | 5.31E-03 | 4.36E-02 |
| 8 | 3852 | F3 vs. M3 | + | Metabolism | Metabolism | UDP-glucuronate metabolic process                      | GO:0046398 | P | 5    | 3.87E-03 | 3.35E-02 |
| 8 | 3853 | F3 vs. M3 | + | Metabolism | Metabolism | UDP-glycosyltransferase activity                       | GO:0008194 | F | 189  | 2.18E-06 | 1.57E-04 |

|   |      |           |   |            |                |                                                          |            |   |      |          |          |
|---|------|-----------|---|------------|----------------|----------------------------------------------------------|------------|---|------|----------|----------|
| 8 | 3854 | F3 vs. M3 | + | Metabolism | Metabolism     | UDP-rhamnose biosynthetic process                        | GO:0010253 | P | 4    | 3.40E-03 | 3.07E-02 |
| 8 | 3855 | F3 vs. M3 | + | Metabolism | Metabolism     | UDP-rhamnose metabolic process                           | GO:0033478 | P | 4    | 3.40E-03 | 3.07E-02 |
| 8 | 3856 | F3 vs. M3 | + | Metabolism | Metabolism     | vitamin B6 binding                                       | GO:0070279 | F | 68   | 6.43E-04 | 1.64E-02 |
| 8 | 3857 | F3 vs. M3 | + | Metabolism | Metabolism     | vitamin binding                                          | GO:0019842 | F | 84   | 1.19E-03 | 2.61E-02 |
| 8 | 3858 | F3 vs. M3 | + | Metabolism | Metabolism     | wax biosynthetic process                                 | GO:0010025 | P | 20   | 3.75E-03 | 3.28E-02 |
| 8 | 3859 | F3 vs. M3 | + | Metabolism | Metabolism     | wax metabolic process                                    | GO:0010166 | P | 20   | 3.75E-03 | 3.27E-02 |
| 8 | 3860 | F3 vs. M3 | + | Metabolism | Photosynthesis | carbon fixation                                          | GO:0015977 | P | 15   | 3.14E-06 | 8.19E-05 |
| 8 | 3861 | F3 vs. M3 | + | Metabolism | Photosynthesis | chlorophyll metabolic process                            | GO:0015994 | P | 47   | 1.17E-03 | 1.32E-02 |
| 8 | 3862 | F3 vs. M3 | + | Metabolism | Photosynthesis | chloroplast                                              | GO:0009507 | C | 3011 | 0.00E+00 | 0.00E+00 |
| 8 | 3863 | F3 vs. M3 | + | Metabolism | Photosynthesis | chloroplast envelope                                     | GO:0009941 | C | 463  | 0.00E+00 | 0.00E+00 |
| 8 | 3864 | F3 vs. M3 | + | Metabolism | Photosynthesis | chloroplast stroma                                       | GO:0009570 | C | 532  | 0.00E+00 | 0.00E+00 |
| 8 | 3865 | F3 vs. M3 | + | Metabolism | Photosynthesis | chloroplast thylakoid                                    | GO:0009534 | C | 319  | 0.00E+00 | 0.00E+00 |
| 8 | 3866 | F3 vs. M3 | + | Metabolism | Photosynthesis | chloroplast thylakoid lumen                              | GO:0009543 | C | 37   | 1.61E-03 | 1.15E-02 |
| 8 | 3867 | F3 vs. M3 | + | Metabolism | Photosynthesis | chloroplast thylakoid membrane                           | GO:0009535 | C | 256  | 0.00E+00 | 0.00E+00 |
| 8 | 3868 | F3 vs. M3 | + | Metabolism | Photosynthesis | fructose 1,6-bisphosphate metabolic process              | GO:0030388 | P | 11   | 1.12E-04 | 1.85E-03 |
| 8 | 3869 | F3 vs. M3 | + | Metabolism | Photosynthesis | fructose-bisphosphate aldolase activity                  | GO:0004332 | F | 7    | 5.70E-04 | 1.54E-02 |
| 8 | 3870 | F3 vs. M3 | + | Metabolism | Photosynthesis | photosynthesis                                           | GO:0015979 | P | 146  | 3.28E-13 | 6.08E-11 |
| 8 | 3871 | F3 vs. M3 | + | Metabolism | Photosynthesis | photosynthesis, dark reaction                            | GO:0019685 | P | 15   | 1.60E-06 | 4.57E-05 |
| 8 | 3872 | F3 vs. M3 | + | Metabolism | Photosynthesis | photosynthesis, light harvesting                         | GO:0009765 | P | 32   | 1.45E-04 | 2.28E-03 |
| 8 | 3873 | F3 vs. M3 | + | Metabolism | Photosynthesis | photosynthesis, light reaction                           | GO:0019684 | P | 97   | 6.71E-09 | 3.36E-07 |
| 8 | 3874 | F3 vs. M3 | + | Metabolism | Photosynthesis | photosynthetic electron transport chain                  | GO:0009767 | P | 38   | 7.96E-04 | 9.53E-03 |
| 8 | 3875 | F3 vs. M3 | + | Metabolism | Photosynthesis | photosynthetic membrane                                  | GO:0034357 | C | 280  | 0.00E+00 | 0.00E+00 |
| 8 | 3876 | F3 vs. M3 | + | Metabolism | Photosynthesis | photosystem II                                           | GO:0009523 | C | 31   | 8.74E-03 | 4.79E-02 |
| 8 | 3877 | F3 vs. M3 | + | Metabolism | Photosynthesis | plastid                                                  | GO:0009536 | C | 3312 | 0.00E+00 | 0.00E+00 |
| 8 | 3878 | F3 vs. M3 | + | Metabolism | Photosynthesis | plastid envelope                                         | GO:0009526 | C | 479  | 0.00E+00 | 0.00E+00 |
| 8 | 3879 | F3 vs. M3 | + | Metabolism | Photosynthesis | plastid stroma                                           | GO:0009532 | C | 540  | 0.00E+00 | 0.00E+00 |
| 8 | 3880 | F3 vs. M3 | + | Metabolism | Photosynthesis | plastid thylakoid                                        | GO:0031976 | C | 321  | 0.00E+00 | 0.00E+00 |
| 8 | 3881 | F3 vs. M3 | + | Metabolism | Photosynthesis | plastid thylakoid lumen                                  | GO:0031978 | C | 37   | 1.61E-03 | 1.14E-02 |
| 8 | 3882 | F3 vs. M3 | + | Metabolism | Photosynthesis | plastid thylakoid membrane                               | GO:0055035 | C | 259  | 0.00E+00 | 0.00E+00 |
| 8 | 3883 | F3 vs. M3 | + | Metabolism | Photosynthesis | plastoglobule                                            | GO:0010287 | C | 56   | 2.49E-07 | 3.74E-06 |
| 8 | 3884 | F3 vs. M3 | + | Metabolism | Photosynthesis | protein import into chloroplast thylakoid membrane       | GO:0045038 | P | 5    | 2.86E-03 | 2.67E-02 |
| 8 | 3885 | F3 vs. M3 | + | Metabolism | Photosynthesis | regulation of photosynthesis                             | GO:0010109 | P | 32   | 2.68E-04 | 3.90E-03 |
| 8 | 3886 | F3 vs. M3 | + | Metabolism | Photosynthesis | thylakoid                                                | GO:0009579 | C | 392  | 0.00E+00 | 0.00E+00 |
| 8 | 3887 | F3 vs. M3 | + | Metabolism | Photosynthesis | thylakoid lumen                                          | GO:0031977 | C | 50   | 6.47E-06 | 7.64E-05 |
| 8 | 3888 | F3 vs. M3 | + | Metabolism | Photosynthesis | thylakoid membrane                                       | GO:0042651 | C | 277  | 0.00E+00 | 0.00E+00 |
| 8 | 3889 | F3 vs. M3 | + | Metabolism | Transporters   | acidic amino acid transport                              | GO:0015800 | P | 7    | 5.36E-03 | 4.37E-02 |
| 8 | 3890 | F3 vs. M3 | + | Metabolism | Transporters   | active ion transmembrane transporter activity            | GO:0022853 | F | 151  | 4.56E-14 | 1.64E-11 |
| 8 | 3891 | F3 vs. M3 | + | Metabolism | Transporters   | active transmembrane transporter activity                | GO:0022804 | F | 324  | 0.00E+00 | 0.00E+00 |
| 8 | 3892 | F3 vs. M3 | + | Metabolism | Transporters   | anion transmembrane transport                            | GO:0098656 | P | 74   | 1.13E-04 | 1.85E-03 |
| 8 | 3893 | F3 vs. M3 | + | Metabolism | Transporters   | anion transmembrane transporter activity                 | GO:0008509 | F | 232  | 1.89E-07 | 2.09E-05 |
| 8 | 3894 | F3 vs. M3 | + | Metabolism | Transporters   | anion transport                                          | GO:0006820 | P | 181  | 3.07E-05 | 5.99E-04 |
| 8 | 3895 | F3 vs. M3 | + | Metabolism | Transporters   | anion:anion antiporter activity                          | GO:0015301 | F | 23   | 7.88E-07 | 6.66E-05 |
| 8 | 3896 | F3 vs. M3 | + | Metabolism | Transporters   | antiporter activity                                      | GO:0015297 | F | 127  | 1.01E-10 | 2.08E-08 |
| 8 | 3897 | F3 vs. M3 | + | Metabolism | Transporters   | ATPase-coupled cation transmembrane transporter activity | GO:0019829 | F | 50   | 1.12E-06 | 8.98E-05 |
| 8 | 3898 | F3 vs. M3 | + | Metabolism | Transporters   | ATPase-coupled ion transmembrane transporter activity    | GO:0042625 | F | 62   | 3.11E-06 | 2.18E-04 |
| 8 | 3899 | F3 vs. M3 | + | Metabolism | Transporters   | ATPase-coupled transmembrane transporter activity        | GO:0042626 | F | 141  | 6.17E-06 | 4.13E-04 |
| 8 | 3900 | F3 vs. M3 | + | Metabolism | Transporters   | C4-dicarboxylate transmembrane transporter activity      | GO:0015556 | F | 8    | 9.76E-04 | 2.28E-02 |
| 8 | 3901 | F3 vs. M3 | + | Metabolism | Transporters   | C4-dicarboxylate transport                               | GO:0015740 | P | 10   | 5.47E-03 | 4.44E-02 |
| 8 | 3902 | F3 vs. M3 | + | Metabolism | Transporters   | calcium ion transmembrane transport                      | GO:0070588 | P | 26   | 2.89E-03 | 2.69E-02 |
| 8 | 3903 | F3 vs. M3 | + | Metabolism | Transporters   | carbohydrate derivative transport                        | GO:1901264 | P | 39   | 2.00E-03 | 2.02E-02 |
| 8 | 3904 | F3 vs. M3 | + | Metabolism | Transporters   | carbohydrate transmembrane transporter activity          | GO:0015144 | F | 65   | 1.25E-04 | 4.80E-03 |
| 8 | 3905 | F3 vs. M3 | + | Metabolism | Transporters   | carboxylic acid transmembrane transport                  | GO:1905039 | P | 39   | 1.63E-03 | 1.73E-02 |
| 8 | 3906 | F3 vs. M3 | + | Metabolism | Transporters   | carboxylic acid transmembrane transporter activity       | GO:0046943 | F | 91   | 2.66E-04 | 8.50E-03 |
| 8 | 3907 | F3 vs. M3 | + | Metabolism | Transporters   | cation transmembrane transport                           | GO:0098655 | P | 144  | 4.96E-07 | 1.59E-05 |
| 8 | 3908 | F3 vs. M3 | + | Metabolism | Transporters   | cation transmembrane transporter activity                | GO:0008324 | F | 270  | 9.93E-11 | 2.20E-08 |
| 8 | 3909 | F3 vs. M3 | + | Metabolism | Transporters   | cation transport                                         | GO:0006812 | P | 249  | 8.24E-06 | 1.87E-04 |
| 8 | 3910 | F3 vs. M3 | + | Metabolism | Transporters   | cytoplasmic vesicle                                      | GO:0031410 | C | 486  | 1.60E-07 | 2.52E-06 |
| 8 | 3911 | F3 vs. M3 | + | Metabolism | Transporters   | dicarboxylic acid transport                              | GO:0006835 | P | 16   | 1.42E-03 | 1.55E-02 |
| 8 | 3912 | F3 vs. M3 | + | Metabolism | Transporters   | endosome                                                 | GO:0005768 | C | 289  | 2.81E-05 | 3.00E-04 |
| 8 | 3913 | F3 vs. M3 | + | Metabolism | Transporters   | export from cell                                         | GO:0140352 | P | 62   | 1.96E-03 | 1.98E-02 |
| 8 | 3914 | F3 vs. M3 | + | Metabolism | Transporters   | fluid transport                                          | GO:0042044 | P | 19   | 9.88E-06 | 2.19E-04 |
| 8 | 3915 | F3 vs. M3 | + | Metabolism | Transporters   | inorganic anion transmembrane transporter activity       | GO:0015103 | F | 77   | 2.69E-04 | 8.39E-03 |
| 8 | 3916 | F3 vs. M3 | + | Metabolism | Transporters   | inorganic anion transport                                | GO:0015698 | P | 64   | 2.36E-03 | 2.33E-02 |
| 8 | 3917 | F3 vs. M3 | + | Metabolism | Transporters   | inorganic cation transmembrane transport                 | GO:0098662 | P | 140  | 7.40E-07 | 2.28E-05 |

|   |      |           |   |                        |                      |                                                                |            |   |      |          |          |
|---|------|-----------|---|------------------------|----------------------|----------------------------------------------------------------|------------|---|------|----------|----------|
| 8 | 3918 | F3 vs. M3 | + | Metabolism             | Transporters         | inorganic cation transmembrane transporter activity            | GO:0022890 | F | 243  | 2.76E-10 | 4.96E-08 |
| 8 | 3919 | F3 vs. M3 | + | Metabolism             | Transporters         | inorganic ion transmembrane transport                          | GO:0098660 | P | 157  | 4.23E-08 | 1.84E-06 |
| 8 | 3920 | F3 vs. M3 | + | Metabolism             | Transporters         | inorganic molecular entity transmembrane transporter activity  | GO:0015318 | F | 430  | 2.22E-16 | 1.06E-13 |
| 8 | 3921 | F3 vs. M3 | + | Metabolism             | Transporters         | ion transmembrane transport                                    | GO:0034220 | P | 216  | 2.93E-10 | 2.01E-08 |
| 8 | 3922 | F3 vs. M3 | + | Metabolism             | Transporters         | ion transmembrane transporter activity                         | GO:0015075 | F | 475  | 4.30E-14 | 1.76E-11 |
|   |      |           |   |                        |                      | ion transmembrane transporter activity, phosphorylative        |            |   |      |          |          |
| 8 | 3923 | F3 vs. M3 | + | Metabolism             | Transporters         | mechanism                                                      | GO:0015662 | F | 42   | 3.94E-04 | 1.15E-02 |
| 8 | 3924 | F3 vs. M3 | + | Metabolism             | Transporters         | ion transport                                                  | GO:0006811 | P | 416  | 3.99E-09 | 2.17E-07 |
| 8 | 3925 | F3 vs. M3 | + | Metabolism             | Transporters         | malate transmembrane transport                                 | GO:0071423 | P | 4    | 4.49E-03 | 3.79E-02 |
| 8 | 3926 | F3 vs. M3 | + | Metabolism             | Transporters         | malate transmembrane transporter activity                      | GO:0015140 | F | 7    | 2.92E-04 | 8.92E-03 |
| 8 | 3927 | F3 vs. M3 | + | Metabolism             | Transporters         | metal ion transmembrane transporter activity                   | GO:0046873 | F | 142  | 1.47E-04 | 5.34E-03 |
|   |      |           |   |                        |                      |                                                                |            |   |      |          |          |
| 8 | 3928 | F3 vs. M3 | + | Metabolism             | Transporters         | monovalent inorganic cation transmembrane transporter activity | GO:0015077 | F | 138  | 4.25E-09 | 6.11E-07 |
| 8 | 3929 | F3 vs. M3 | + | Metabolism             | Transporters         | monovalent inorganic cation transport                          | GO:0015672 | P | 101  | 1.55E-06 | 4.46E-05 |
| 8 | 3930 | F3 vs. M3 | + | Metabolism             | Transporters         | neutral amino acid transmembrane transporter activity          | GO:0015175 | F | 13   | 1.19E-03 | 2.62E-02 |
| 8 | 3931 | F3 vs. M3 | + | Metabolism             | Transporters         | one-carbon compound transport                                  | GO:0019755 | P | 7    | 4.10E-04 | 5.50E-03 |
| 8 | 3932 | F3 vs. M3 | + | Metabolism             | Transporters         | organic acid transmembrane transport                           | GO:1903825 | P | 41   | 2.91E-03 | 2.68E-02 |
| 8 | 3933 | F3 vs. M3 | + | Metabolism             | Transporters         | organic acid transmembrane transporter activity                | GO:0005342 | F | 91   | 2.66E-04 | 8.40E-03 |
| 8 | 3934 | F3 vs. M3 | + | Metabolism             | Transporters         | organic anion transmembrane transporter activity               | GO:0008514 | F | 146  | 5.26E-05 | 2.26E-03 |
| 8 | 3935 | F3 vs. M3 | + | Metabolism             | Transporters         | organic anion transport                                        | GO:0015711 | P | 110  | 2.99E-04 | 4.21E-03 |
| 8 | 3936 | F3 vs. M3 | + | Metabolism             | Transporters         | organic substance transport                                    | GO:0071702 | P | 653  | 2.01E-03 | 2.03E-02 |
| 8 | 3937 | F3 vs. M3 | + | Metabolism             | Transporters         | oxaloacetate transport                                         | GO:0015729 | P | 4    | 4.49E-03 | 3.79E-02 |
| 8 | 3938 | F3 vs. M3 | + | Metabolism             | Transporters         | plasmodesma                                                    | GO:0009506 | C | 654  | 7.73E-03 | 4.46E-02 |
| 8 | 3939 | F3 vs. M3 | + | Metabolism             | Transporters         | primary active transmembrane transporter activity              | GO:0015399 | F | 155  | 1.61E-06 | 1.22E-04 |
| 8 | 3940 | F3 vs. M3 | + | Metabolism             | Transporters         | proton transmembrane transporter activity                      | GO:0015078 | F | 108  | 4.99E-09 | 6.82E-07 |
| 8 | 3941 | F3 vs. M3 | + | Metabolism             | Transporters         | regulation of ion transmembrane transporter activity           | GO:0032412 | P | 8    | 3.70E-03 | 3.27E-02 |
| 8 | 3942 | F3 vs. M3 | + | Metabolism             | Transporters         | regulation of transmembrane transporter activity               | GO:0022898 | P | 8    | 3.70E-03 | 3.28E-02 |
| 8 | 3943 | F3 vs. M3 | + | Metabolism             | Transporters         | secondary active transmembrane transporter activity            | GO:0015291 | F | 166  | 6.32E-13 | 2.02E-10 |
| 8 | 3944 | F3 vs. M3 | + | Metabolism             | Transporters         | secretory vesicle                                              | GO:0099503 | C | 118  | 1.00E-03 | 7.67E-03 |
| 8 | 3945 | F3 vs. M3 | + | Metabolism             | Transporters         | solute:anion antiporter activity                               | GO:0140323 | F | 23   | 7.88E-07 | 6.86E-05 |
| 8 | 3946 | F3 vs. M3 | + | Metabolism             | Transporters         | solute:cation symporter activity                               | GO:0015294 | F | 21   | 4.31E-04 | 1.24E-02 |
| 8 | 3947 | F3 vs. M3 | + | Metabolism             | Transporters         | solute:proton symporter activity                               | GO:0015295 | F | 18   | 4.32E-04 | 1.23E-02 |
| 8 | 3948 | F3 vs. M3 | + | Metabolism             | Transporters         | sulfate transmembrane transporter activity                     | GO:0015116 | F | 13   | 1.15E-03 | 2.57E-02 |
| 8 | 3949 | F3 vs. M3 | + | Metabolism             | Transporters         | symporter activity                                             | GO:0015293 | F | 22   | 1.11E-03 | 2.50E-02 |
| 8 | 3950 | F3 vs. M3 | + | Metabolism             | Transporters         | trans-Golgi network                                            | GO:0005802 | C | 217  | 3.56E-10 | 8.21E-09 |
| 8 | 3951 | F3 vs. M3 | + | Metabolism             | Transporters         | transmembrane transport                                        | GO:0055085 | P | 541  | 1.11E-16 | 3.25E-14 |
| 8 | 3952 | F3 vs. M3 | + | Metabolism             | Transporters         | transmembrane transporter activity                             | GO:0022857 | F | 799  | 0.00E+00 | 0.00E+00 |
| 8 | 3953 | F3 vs. M3 | + | Metabolism             | Transporters         | transport                                                      | GO:0006810 | P | 1386 | 1.29E-09 | 7.77E-08 |
| 8 | 3954 | F3 vs. M3 | + | Metabolism             | Transporters         | transporter activity                                           | GO:0005215 | F | 827  | 0.00E+00 | 0.00E+00 |
| 8 | 3955 | F3 vs. M3 | + | Metabolism             | Transporters         | urea transmembrane transporter activity                        | GO:0015204 | F | 6    | 1.64E-04 | 5.75E-03 |
| 8 | 3956 | F3 vs. M3 | + | Metabolism             | Transporters         | urea transport                                                 | GO:0015840 | P | 5    | 7.43E-04 | 9.05E-03 |
| 8 | 3957 | F3 vs. M3 | + | Metabolism             | Transporters         | vesicle                                                        | GO:0031982 | C | 527  | 2.19E-08 | 3.88E-07 |
| 8 | 3958 | F3 vs. M3 | + | Metabolism             | Transporters         | water channel activity                                         | GO:0015250 | F | 22   | 6.58E-06 | 4.21E-04 |
| 8 | 3959 | F3 vs. M3 | + | Metabolism             | Transporters         | water transmembrane transporter activity                       | GO:0005372 | F | 22   | 6.58E-06 | 4.30E-04 |
| 8 | 3960 | F3 vs. M3 | + | Metabolism             | Transporters         | water transport                                                | GO:0006833 | P | 19   | 9.88E-06 | 2.20E-04 |
| 8 | 3961 | F3 vs. M3 | + | Metabolism             | Transporters         | xenobiotic transmembrane transporter activity                  | GO:0042910 | F | 47   | 1.48E-04 | 5.31E-03 |
| 8 | 3962 | F3 vs. M3 | + | Regulation             | Protein modification | Golgi apparatus                                                | GO:0005794 | C | 771  | 1.91E-11 | 5.12E-10 |
| 8 | 3963 | F3 vs. M3 | + | Regulation             | Protein modification | peptidyl-serine modification                                   | GO:0018209 | P | 71   | 3.28E-03 | 2.98E-02 |
| 8 | 3964 | F3 vs. M3 | + | Regulation             | Protein modification | protein disulfide oxidoreductase activity                      | GO:0015035 | F | 33   | 1.48E-03 | 3.15E-02 |
| 8 | 3965 | F3 vs. M3 | + | Regulation             | Regulation           | regulation of biological quality                               | GO:0065008 | P | 607  | 1.19E-03 | 1.34E-02 |
| 8 | 3966 | F3 vs. M3 | + | Regulation             | Regulation           | regulation of cell growth                                      | GO:0001558 | P | 81   | 2.56E-03 | 2.45E-02 |
| 8 | 3967 | F3 vs. M3 | + | Regulation             | Regulation           | regulation of cell morphogenesis involved in differentiation   | GO:0010769 | P | 33   | 2.91E-07 | 9.91E-06 |
| 8 | 3968 | F3 vs. M3 | + | Regulation             | Regulation           | regulation of cellular ketone metabolic process                | GO:0010565 | P | 57   | 4.05E-03 | 3.49E-02 |
| 8 | 3969 | F3 vs. M3 | + | Regulation             | Regulation           | regulation of pollen tube growth                               | GO:0080092 | P | 30   | 8.10E-08 | 3.26E-06 |
| 8 | 3970 | F3 vs. M3 | + | Regulation             | Regulation           | regulation of small molecule metabolic process                 | GO:0062012 | P | 71   | 5.18E-03 | 4.28E-02 |
| 8 | 3971 | F3 vs. M3 | + | Regulation             | Regulation           | regulation of unidimensional cell growth                       | GO:0051510 | P | 55   | 8.42E-05 | 1.44E-03 |
| 8 | 3972 | F3 vs. M3 | + | Regulation             | Translation          | poly(U) RNA binding                                            | GO:0008266 | F | 18   | 8.78E-04 | 2.10E-02 |
| 8 | 3973 | F3 vs. M3 | + | Signaling and response | Signaling            | 1-phosphatidylinositol-4-phosphate 5-kinase activity           | GO:0016308 | F | 6    | 2.07E-04 | 6.83E-03 |
| 8 | 3974 | F3 vs. M3 | + | Signaling and response | Signaling            | calcium ion binding                                            | GO:0005509 | F | 158  | 3.31E-11 | 9.51E-09 |
| 8 | 3975 | F3 vs. M3 | + | Signaling and response | Signaling            | cellular response to abiotic stimulus                          | GO:0071214 | P | 128  | 1.35E-04 | 2.13E-03 |
| 8 | 3976 | F3 vs. M3 | + | Signaling and response | Signaling            | cellular response to blue light                                | GO:0071483 | P | 20   | 3.00E-03 | 2.75E-02 |
| 8 | 3977 | F3 vs. M3 | + | Signaling and response | Signaling            | cellular response to chemical stimulus                         | GO:0070887 | P | 655  | 3.58E-04 | 4.91E-03 |
| 8 | 3978 | F3 vs. M3 | + | Signaling and response | Signaling            | cellular response to environmental stimulus                    | GO:0104004 | P | 128  | 1.35E-04 | 2.14E-03 |
| 8 | 3979 | F3 vs. M3 | + | Signaling and response | Signaling            | cellular response to external stimulus                         | GO:0071496 | P | 134  | 2.51E-03 | 2.43E-02 |



|   |      |           |   |                        |           |                                                        |            |   |      |          |          |
|---|------|-----------|---|------------------------|-----------|--------------------------------------------------------|------------|---|------|----------|----------|
| 8 | 3980 | F3 vs. M3 | + | Signaling and response | Signaling | cellular response to extracellular stimulus            | GO:0031668 | P | 129  | 3.74E-04 | 5.07E-03 |
| 8 | 3981 | F3 vs. M3 | + | Signaling and response | Signaling | cellular response to light stimulus                    | GO:0071482 | P | 74   | 7.89E-04 | 9.49E-03 |
| 8 | 3982 | F3 vs. M3 | + | Signaling and response | Signaling | cellular response to radiation                         | GO:0071478 | P | 79   | 1.53E-03 | 1.64E-02 |
| 8 | 3983 | F3 vs. M3 | + | Signaling and response | Signaling | cellular response to water stimulus                    | GO:0071462 | P | 23   | 7.22E-04 | 8.89E-03 |
| 8 | 3984 | F3 vs. M3 | + | Signaling and response | Signaling | dephosphorylation                                      | GO:0016311 | P | 134  | 1.71E-03 | 1.79E-02 |
| 8 | 3985 | F3 vs. M3 | + | Signaling and response | Signaling | disulfide oxidoreductase activity                      | GO:0015036 | F | 44   | 4.52E-05 | 2.00E-03 |
| 8 | 3986 | F3 vs. M3 | + | Signaling and response | Signaling | intracellular signal transduction                      | GO:0035556 | P | 229  | 7.71E-04 | 9.29E-03 |
| 8 | 3987 | F3 vs. M3 | + | Signaling and response | Signaling | jasmonic acid biosynthetic process                     | GO:0009695 | P | 21   | 5.34E-03 | 4.36E-02 |
| 8 | 3988 | F3 vs. M3 | + | Signaling and response | Signaling | multi-organism process                                 | GO:0051704 | P | 286  | 3.50E-04 | 4.83E-03 |
| 8 | 3989 | F3 vs. M3 | + | Signaling and response | Signaling | oxidative phosphorylation                              | GO:0006119 | P | 33   | 6.15E-04 | 7.80E-03 |
| 8 | 3990 | F3 vs. M3 | + | Signaling and response | Signaling | peptidyl-serine phosphorylation                        | GO:0018105 | P | 70   | 3.50E-03 | 3.15E-02 |
| 8 | 3991 | F3 vs. M3 | + | Signaling and response | Signaling | phosphatase activity                                   | GO:0016791 | F | 217  | 5.10E-04 | 1.41E-02 |
| 8 | 3992 | F3 vs. M3 | + | Signaling and response | Signaling | phosphatidylinositol dephosphorylation                 | GO:0046856 | P | 19   | 6.08E-04 | 7.76E-03 |
| 8 | 3993 | F3 vs. M3 | + | Signaling and response | Signaling | phosphatidylinositol phosphate kinase activity         | GO:0016307 | F | 11   | 1.23E-03 | 2.67E-02 |
| 8 | 3994 | F3 vs. M3 | + | Signaling and response | Signaling | phosphatidylinositol phosphate phosphatase activity    | GO:0052866 | F | 21   | 1.89E-03 | 3.88E-02 |
| 8 | 3995 | F3 vs. M3 | + | Signaling and response | Signaling | phosphatidylinositol phospholipase C activity          | GO:0004435 | F | 4    | 2.27E-03 | 4.49E-02 |
| 8 | 3996 | F3 vs. M3 | + | Signaling and response | Signaling | phospholipase activity                                 | GO:0004620 | F | 26   | 8.03E-04 | 1.97E-02 |
| 8 | 3997 | F3 vs. M3 | + | Signaling and response | Signaling | phospholipase C activity                               | GO:0004629 | F | 5    | 8.82E-04 | 2.10E-02 |
| 8 | 3998 | F3 vs. M3 | + | Signaling and response | Signaling | phospholipid dephosphorylation                         | GO:0046839 | P | 19   | 6.08E-04 | 7.75E-03 |
| 8 | 3999 | F3 vs. M3 | + | Signaling and response | Signaling | regulation of auxin metabolic process                  | GO:0090354 | P | 12   | 1.68E-03 | 1.77E-02 |
| 8 | 4000 | F3 vs. M3 | + | Signaling and response | Signaling | regulation of gibberellin biosynthetic process         | GO:0010371 | P | 7    | 2.81E-03 | 2.64E-02 |
| 8 | 4001 | F3 vs. M3 | + | Signaling and response | Signaling | regulation of jasmonic acid mediated signaling pathway | GO:2000022 | P | 27   | 2.86E-03 | 2.67E-02 |
| 8 | 4002 | F3 vs. M3 | + | Signaling and response | Signaling | response to abiotic stimulus                           | GO:0009628 | P | 1391 | 1.37E-14 | 2.81E-12 |
| 8 | 4003 | F3 vs. M3 | + | Signaling and response | Signaling | response to acid chemical                              | GO:0001101 | P | 263  | 1.46E-09 | 8.70E-08 |
| 8 | 4004 | F3 vs. M3 | + | Signaling and response | Signaling | response to bacterium                                  | GO:0009617 | P | 332  | 4.73E-09 | 2.50E-07 |
| 8 | 4005 | F3 vs. M3 | + | Signaling and response | Signaling | response to biotic stimulus                            | GO:0009607 | P | 693  | 1.51E-12 | 1.86E-10 |
| 8 | 4006 | F3 vs. M3 | + | Signaling and response | Signaling | response to cadmium ion                                | GO:0046686 | P | 234  | 9.12E-11 | 6.94E-09 |
| 8 | 4007 | F3 vs. M3 | + | Signaling and response | Signaling | response to chemical                                   | GO:0042221 | P | 1678 | 0.00E+00 | 0.00E+00 |
| 8 | 4008 | F3 vs. M3 | + | Signaling and response | Signaling | response to chitin                                     | GO:0010200 | P | 89   | 2.29E-05 | 4.67E-04 |
| 8 | 4009 | F3 vs. M3 | + | Signaling and response | Signaling | response to endogenous stimulus                        | GO:0009719 | P | 767  | 7.71E-07 | 2.34E-05 |
| 8 | 4010 | F3 vs. M3 | + | Signaling and response | Signaling | response to external biotic stimulus                   | GO:0043207 | P | 692  | 1.61E-12 | 1.95E-10 |
| 8 | 4011 | F3 vs. M3 | + | Signaling and response | Signaling | response to external stimulus                          | GO:0009605 | P | 949  | 1.11E-15 | 2.80E-13 |
| 8 | 4012 | F3 vs. M3 | + | Signaling and response | Signaling | response to extracellular stimulus                     | GO:0009991 | P | 164  | 9.50E-06 | 2.13E-04 |
| 8 | 4013 | F3 vs. M3 | + | Signaling and response | Signaling | response to hormone                                    | GO:0009725 | P | 746  | 3.83E-07 | 1.25E-05 |
| 8 | 4014 | F3 vs. M3 | + | Signaling and response | Signaling | response to inorganic substance                        | GO:0010035 | P | 615  | 0.00E+00 | 0.00E+00 |
| 8 | 4015 | F3 vs. M3 | + | Signaling and response | Signaling | response to jasmonic acid                              | GO:0009753 | P | 121  | 1.19E-05 | 2.58E-04 |
| 8 | 4016 | F3 vs. M3 | + | Signaling and response | Signaling | response to karrikin                                   | GO:0080167 | P | 97   | 1.81E-07 | 6.61E-06 |
| 8 | 4017 | F3 vs. M3 | + | Signaling and response | Signaling | response to light intensity                            | GO:0009642 | P | 102  | 6.88E-07 | 2.13E-05 |
| 8 | 4018 | F3 vs. M3 | + | Signaling and response | Signaling | response to light stimulus                             | GO:0009416 | P | 479  | 6.34E-09 | 3.23E-07 |
| 8 | 4019 | F3 vs. M3 | + | Signaling and response | Signaling | response to lipid                                      | GO:0033993 | P | 418  | 4.43E-05 | 8.26E-04 |
| 8 | 4020 | F3 vs. M3 | + | Signaling and response | Signaling | response to metal ion                                  | GO:0010038 | P | 304  | 8.97E-10 | 5.54E-08 |
| 8 | 4021 | F3 vs. M3 | + | Signaling and response | Signaling | response to nitrogen compound                          | GO:1901698 | P | 188  | 1.09E-03 | 1.25E-02 |
| 8 | 4022 | F3 vs. M3 | + | Signaling and response | Signaling | response to nutrient levels                            | GO:0031667 | P | 139  | 7.00E-04 | 8.70E-03 |
| 8 | 4023 | F3 vs. M3 | + | Signaling and response | Signaling | response to organic substance                          | GO:0010033 | P | 1042 | 7.51E-10 | 4.69E-08 |
| 8 | 4024 | F3 vs. M3 | + | Signaling and response | Signaling | response to organonitrogen compound                    | GO:0010243 | P | 157  | 4.15E-03 | 3.55E-02 |
| 8 | 4025 | F3 vs. M3 | + | Signaling and response | Signaling | response to oxygen-containing compound                 | GO:1901700 | P | 969  | 3.33E-16 | 8.81E-14 |
| 8 | 4026 | F3 vs. M3 | + | Signaling and response | Signaling | response to salicylic acid                             | GO:0009751 | P | 88   | 7.62E-04 | 9.20E-03 |
| 8 | 4027 | F3 vs. M3 | + | Signaling and response | Signaling | response to stimulus                                   | GO:0050896 | P | 3388 | 3.44E-15 | 8.31E-13 |
| 8 | 4028 | F3 vs. M3 | + | Signaling and response | Signaling | response to temperature stimulus                       | GO:0009266 | P | 403  | 9.73E-09 | 4.70E-07 |
| 8 | 4029 | F3 vs. M3 | + | Signaling and response | Signaling | response to UV                                         | GO:0009411 | P | 87   | 3.98E-03 | 3.44E-02 |
| 8 | 4030 | F3 vs. M3 | + | Signaling and response | Signaling | response to UV-A                                       | GO:0070141 | P | 4    | 4.84E-03 | 4.03E-02 |
| 8 | 4031 | F3 vs. M3 | + | Signaling and response | Signaling | response to water                                      | GO:0009415 | P | 244  | 9.82E-10 | 5.99E-08 |
| 8 | 4032 | F3 vs. M3 | + | Signaling and response | Signaling | stomatal movement                                      | GO:0010118 | P | 37   | 4.14E-05 | 7.88E-04 |
| 8 | 4033 | F3 vs. M3 | + | Signaling and response | Stress    | anion homeostasis                                      | GO:0055081 | P | 31   | 2.61E-03 | 2.50E-02 |
| 8 | 4034 | F3 vs. M3 | + | Signaling and response | Stress    | antioxidant activity                                   | GO:0016209 | F | 82   | 7.93E-04 | 1.97E-02 |
| 8 | 4035 | F3 vs. M3 | + | Signaling and response | Stress    | auxin homeostasis                                      | GO:0010252 | P | 25   | 4.76E-03 | 3.99E-02 |
| 8 | 4036 | F3 vs. M3 | + | Signaling and response | Stress    | cation homeostasis                                     | GO:0055080 | P | 144  | 5.82E-06 | 1.39E-04 |
| 8 | 4037 | F3 vs. M3 | + | Signaling and response | Stress    | cell redox homeostasis                                 | GO:0045454 | P | 51   | 1.90E-03 | 1.94E-02 |
| 8 | 4038 | F3 vs. M3 | + | Signaling and response | Stress    | cellular cation homeostasis                            | GO:0030003 | P | 96   | 3.27E-04 | 4.57E-03 |
| 8 | 4039 | F3 vs. M3 | + | Signaling and response | Stress    | cellular chemical homeostasis                          | GO:0055082 | P | 119  | 3.29E-03 | 2.99E-02 |
| 8 | 4040 | F3 vs. M3 | + | Signaling and response | Stress    | cellular homeostasis                                   | GO:0019725 | P | 174  | 1.10E-04 | 1.83E-03 |
| 8 | 4041 | F3 vs. M3 | + | Signaling and response | Stress    | cellular ion homeostasis                               | GO:0006873 | P | 101  | 3.33E-04 | 4.64E-03 |
| 8 | 4042 | F3 vs. M3 | + | Signaling and response | Stress    | cellular monovalent inorganic cation homeostasis       | GO:0030004 | P | 27   | 1.44E-03 | 1.56E-02 |
| 8 | 4043 | F3 vs. M3 | + | Signaling and response | Stress    | cellular oxidant detoxification                        | GO:0098869 | P | 16   | 3.71E-03 | 3.28E-02 |

|   |      |           |   |                        |               |                                             |            |   |      |          |          |
|---|------|-----------|---|------------------------|---------------|---------------------------------------------|------------|---|------|----------|----------|
| 8 | 4044 | F3 vs. M3 | + | Signaling and response | Stress        | cellular response to chemical stress        | GO:0062197 | P | 75   | 1.09E-03 | 1.24E-02 |
| 8 | 4045 | F3 vs. M3 | + | Signaling and response | Stress        | cellular response to high light intensity   | GO:0071486 | P | 6    | 2.90E-03 | 2.68E-02 |
| 8 | 4046 | F3 vs. M3 | + | Signaling and response | Stress        | cellular response to light intensity        | GO:0071484 | P | 11   | 1.28E-03 | 1.40E-02 |
| 8 | 4047 | F3 vs. M3 | + | Signaling and response | Stress        | cellular response to oxidative stress       | GO:0034599 | P | 45   | 3.48E-04 | 4.82E-03 |
| 8 | 4048 | F3 vs. M3 | + | Signaling and response | Stress        | cellular response to phosphate starvation   | GO:0016036 | P | 47   | 2.59E-03 | 2.47E-02 |
| 8 | 4049 | F3 vs. M3 | + | Signaling and response | Stress        | cellular response to UV-A                   | GO:0071492 | P | 4    | 4.84E-03 | 4.04E-02 |
| 8 | 4050 | F3 vs. M3 | + | Signaling and response | Stress        | cellular response to water deprivation      | GO:0042631 | P | 23   | 7.22E-04 | 8.91E-03 |
| 8 | 4051 | F3 vs. M3 | + | Signaling and response | Stress        | chemical homeostasis                        | GO:0048878 | P | 255  | 1.35E-07 | 5.20E-06 |
| 8 | 4052 | F3 vs. M3 | + | Signaling and response | Stress        | defense response                            | GO:0006952 | P | 584  | 9.17E-09 | 4.51E-07 |
| 8 | 4053 | F3 vs. M3 | + | Signaling and response | Stress        | defense response to bacterium               | GO:0042742 | P | 268  | 2.35E-08 | 1.07E-06 |
| 8 | 4054 | F3 vs. M3 | + | Signaling and response | Stress        | defense response to Gram-negative bacterium | GO:0050829 | P | 14   | 3.10E-04 | 4.34E-03 |
| 8 | 4055 | F3 vs. M3 | + | Signaling and response | Stress        | defense response to other organism          | GO:0098542 | P | 508  | 6.70E-08 | 2.80E-06 |
| 8 | 4056 | F3 vs. M3 | + | Signaling and response | Stress        | defense response, incompatible interaction  | GO:0009814 | P | 127  | 1.46E-03 | 1.58E-02 |
| 8 | 4057 | F3 vs. M3 | + | Signaling and response | Stress        | detoxification                              | GO:0098754 | P | 62   | 2.71E-04 | 3.94E-03 |
| 8 | 4058 | F3 vs. M3 | + | Signaling and response | Stress        | flavonoid biosynthetic process              | GO:0009813 | P | 36   | 1.64E-04 | 2.54E-03 |
| 8 | 4059 | F3 vs. M3 | + | Signaling and response | Stress        | flavonoid metabolic process                 | GO:0009812 | P | 40   | 7.44E-05 | 1.30E-03 |
| 8 | 4060 | F3 vs. M3 | + | Signaling and response | Stress        | glutathione metabolic process               | GO:0006749 | P | 27   | 5.56E-03 | 4.48E-02 |
| 8 | 4061 | F3 vs. M3 | + | Signaling and response | Stress        | homeostatic process                         | GO:0042592 | P | 333  | 2.54E-06 | 6.81E-05 |
| 8 | 4062 | F3 vs. M3 | + | Signaling and response | Stress        | hydrogen peroxide catabolic process         | GO:0042744 | P | 17   | 1.11E-05 | 2.41E-04 |
| 8 | 4063 | F3 vs. M3 | + | Signaling and response | Stress        | hydrogen peroxide metabolic process         | GO:0042743 | P | 24   | 2.59E-07 | 8.92E-06 |
| 8 | 4064 | F3 vs. M3 | + | Signaling and response | Stress        | hydrogen peroxide transmembrane transport   | GO:0080170 | P | 5    | 2.53E-03 | 2.44E-02 |
| 8 | 4065 | F3 vs. M3 | + | Signaling and response | Stress        | inorganic ion homeostasis                   | GO:0098771 | P | 153  | 6.18E-07 | 1.93E-05 |
| 8 | 4066 | F3 vs. M3 | + | Signaling and response | Stress        | interspecies interaction between organisms  | GO:0044419 | P | 706  | 9.44E-13 | 1.35E-10 |
| 8 | 4067 | F3 vs. M3 | + | Signaling and response | Stress        | ion homeostasis                             | GO:0050801 | P | 179  | 1.74E-07 | 6.39E-06 |
| 8 | 4068 | F3 vs. M3 | + | Signaling and response | Stress        | metal ion homeostasis                       | GO:0055065 | P | 113  | 2.27E-03 | 2.25E-02 |
| 8 | 4069 | F3 vs. M3 | + | Signaling and response | Stress        | monovalent inorganic cation homeostasis     | GO:0055067 | P | 46   | 1.46E-05 | 3.13E-04 |
| 8 | 4070 | F3 vs. M3 | + | Signaling and response | Stress        | reactive oxygen species metabolic process   | GO:0072593 | P | 49   | 6.63E-09 | 3.35E-07 |
| 8 | 4071 | F3 vs. M3 | + | Signaling and response | Stress        | regulation of anion channel activity        | GO:0010359 | P | 5    | 3.84E-03 | 3.34E-02 |
| 8 | 4072 | F3 vs. M3 | + | Signaling and response | Stress        | regulation of cellular pH                   | GO:0030641 | P | 23   | 3.74E-03 | 3.29E-02 |
| 8 | 4073 | F3 vs. M3 | + | Signaling and response | Stress        | regulation of intracellular pH              | GO:0051453 | P | 23   | 3.74E-03 | 3.28E-02 |
| 8 | 4074 | F3 vs. M3 | + | Signaling and response | Stress        | regulation of pH                            | GO:0006885 | P | 35   | 5.14E-05 | 9.43E-04 |
| 8 | 4075 | F3 vs. M3 | + | Signaling and response | Stress        | regulation of stomatal movement             | GO:0010119 | P | 64   | 7.47E-06 | 1.73E-04 |
| 8 | 4076 | F3 vs. M3 | + | Signaling and response | Stress        | response to abscisic acid                   | GO:0009737 | P | 319  | 2.54E-06 | 6.79E-05 |
| 8 | 4077 | F3 vs. M3 | + | Signaling and response | Stress        | response to alcohol                         | GO:0097305 | P | 322  | 8.04E-06 | 1.84E-04 |
| 8 | 4078 | F3 vs. M3 | + | Signaling and response | Stress        | response to cold                            | GO:0009409 | P | 282  | 4.46E-10 | 2.95E-08 |
| 8 | 4079 | F3 vs. M3 | + | Signaling and response | Stress        | response to fungus                          | GO:0009620 | P | 209  | 4.22E-05 | 8.00E-04 |
| 8 | 4080 | F3 vs. M3 | + | Signaling and response | Stress        | response to heat                            | GO:0009408 | P | 143  | 2.90E-03 | 2.68E-02 |
| 8 | 4081 | F3 vs. M3 | + | Signaling and response | Stress        | response to high light intensity            | GO:0009644 | P | 47   | 5.60E-06 | 1.36E-04 |
| 8 | 4082 | F3 vs. M3 | + | Signaling and response | Stress        | response to nematode                        | GO:0009624 | P | 58   | 9.51E-04 | 1.11E-02 |
| 8 | 4083 | F3 vs. M3 | + | Signaling and response | Stress        | response to osmotic stress                  | GO:0006970 | P | 350  | 8.39E-05 | 1.45E-03 |
| 8 | 4084 | F3 vs. M3 | + | Signaling and response | Stress        | response to other organism                  | GO:0051707 | P | 692  | 1.61E-12 | 1.91E-10 |
| 8 | 4085 | F3 vs. M3 | + | Signaling and response | Stress        | response to oxidative stress                | GO:0006979 | P | 290  | 7.79E-08 | 3.18E-06 |
| 8 | 4086 | F3 vs. M3 | + | Signaling and response | Stress        | response to ozone                           | GO:0010193 | P | 27   | 9.86E-04 | 1.14E-02 |
| 8 | 4087 | F3 vs. M3 | + | Signaling and response | Stress        | response to radiation                       | GO:0009314 | P | 497  | 1.82E-07 | 6.62E-06 |
| 8 | 4088 | F3 vs. M3 | + | Signaling and response | Stress        | response to reactive oxygen species         | GO:0000302 | P | 102  | 2.38E-06 | 6.55E-05 |
| 8 | 4089 | F3 vs. M3 | + | Signaling and response | Stress        | response to salt stress                     | GO:0009651 | P | 298  | 2.92E-04 | 4.16E-03 |
| 8 | 4090 | F3 vs. M3 | + | Signaling and response | Stress        | response to starvation                      | GO:0042594 | P | 120  | 5.95E-03 | 4.74E-02 |
| 8 | 4091 | F3 vs. M3 | + | Signaling and response | Stress        | response to stress                          | GO:0006950 | P | 1950 | 9.45E-11 | 7.00E-09 |
| 8 | 4092 | F3 vs. M3 | + | Signaling and response | Stress        | response to toxic substance                 | GO:0009636 | P | 77   | 1.16E-04 | 1.90E-03 |
| 8 | 4093 | F3 vs. M3 | + | Signaling and response | Stress        | response to water deprivation               | GO:0009414 | P | 239  | 1.63E-09 | 9.62E-08 |
| 8 | 4094 | F3 vs. M3 | + | Signaling and response | Stress        | response to wounding                        | GO:0009611 | P | 154  | 5.18E-14 | 9.93E-12 |
| 8 | 4095 | F3 vs. M3 | + | Signaling and response | Stress        | toxin metabolic process                     | GO:0009404 | P | 37   | 6.09E-04 | 7.75E-03 |
| 8 | 4096 | F3 vs. M3 | + | Signaling and response | Stress        | vitamin metabolic process                   | GO:0006766 | P | 46   | 3.61E-03 | 3.24E-02 |
| 8 | 4097 | F3 vs. M3 | + | Signaling and response | Stress        | water-soluble vitamin metabolic process     | GO:0006767 | P | 38   | 3.67E-03 | 3.27E-02 |
| 8 | 4098 | F3 vs. M3 | - | Development            | Cell division | alpha DNA polymerase:primase complex        | GO:0005658 | C | 4    | 7.75E-03 | 4.34E-02 |
| 8 | 4099 | F3 vs. M3 | - | Development            | Cell division | ATP-dependent microtubule motor activity    | GO:1990939 | F | 12   | 5.69E-04 | 1.56E-02 |
| 8 | 4100 | F3 vs. M3 | - | Development            | Cell division | Cajal body                                  | GO:0015030 | C | 10   | 9.01E-03 | 4.81E-02 |
| 8 | 4101 | F3 vs. M3 | - | Development            | Cell division | cell cycle                                  | GO:0007049 | P | 303  | 0.00E+00 | 0.00E+00 |
| 8 | 4102 | F3 vs. M3 | - | Development            | Cell division | cell cycle arrest                           | GO:0007050 | P | 5    | 5.49E-03 | 4.43E-02 |
| 8 | 4103 | F3 vs. M3 | - | Development            | Cell division | cell cycle checkpoint                       | GO:0000075 | P | 29   | 3.75E-05 | 7.15E-04 |
| 8 | 4104 | F3 vs. M3 | - | Development            | Cell division | cell cycle DNA replication                  | GO:0044786 | P | 25   | 5.21E-03 | 4.30E-02 |
| 8 | 4105 | F3 vs. M3 | - | Development            | Cell division | cell cycle G1/S phase transition            | GO:0044843 | P | 8    | 1.08E-03 | 1.24E-02 |
| 8 | 4106 | F3 vs. M3 | - | Development            | Cell division | cell cycle phase transition                 | GO:0044770 | P | 36   | 5.83E-10 | 3.72E-08 |
| 8 | 4107 | F3 vs. M3 | - | Development            | Cell division | cell cycle process                          | GO:0022402 | P | 278  | 0.00E+00 | 0.00E+00 |

|   |      |           |   |             |               |                                                                     |            |   |     |          |          |
|---|------|-----------|---|-------------|---------------|---------------------------------------------------------------------|------------|---|-----|----------|----------|
| 8 | 4108 | F3 vs. M3 | - | Development | Cell division | chiasma assembly                                                    | GO:0051026 | P | 9   | 1.89E-03 | 1.93E-02 |
| 8 | 4109 | F3 vs. M3 | - | Development | Cell division | chromatin assembly                                                  | GO:0031497 | P | 54  | 5.23E-05 | 9.55E-04 |
| 8 | 4110 | F3 vs. M3 | - | Development | Cell division | chromosome                                                          | GO:0005694 | C | 319 | 8.73E-14 | 2.71E-12 |
| 8 | 4111 | F3 vs. M3 | - | Development | Cell division | chromosome organization involved in meiotic cell cycle              | GO:0070192 | P | 31  | 2.82E-05 | 5.60E-04 |
| 8 | 4112 | F3 vs. M3 | - | Development | Cell division | chromosome segregation                                              | GO:0007059 | P | 67  | 4.52E-08 | 1.93E-06 |
| 8 | 4113 | F3 vs. M3 | - | Development | Cell division | chromosome, centromeric region                                      | GO:0000775 | C | 26  | 1.03E-04 | 1.03E-03 |
| 8 | 4114 | F3 vs. M3 | - | Development | Cell division | condensed chromosome                                                | GO:0000793 | C | 37  | 4.67E-09 | 9.46E-08 |
| 8 | 4115 | F3 vs. M3 | - | Development | Cell division | condensed chromosome, centromeric region                            | GO:0000779 | C | 12  | 1.23E-03 | 9.25E-03 |
| 8 | 4116 | F3 vs. M3 | - | Development | Cell division | condensed nuclear chromosome                                        | GO:0000794 | C | 25  | 1.14E-07 | 1.86E-06 |
| 8 | 4117 | F3 vs. M3 | - | Development | Cell division | condensed nuclear chromosome, centromeric region                    | GO:0000780 | C | 9   | 4.86E-03 | 2.97E-02 |
| 8 | 4118 | F3 vs. M3 | - | Development | Cell division | condensin complex                                                   | GO:0000796 | C | 8   | 2.03E-03 | 1.41E-02 |
| 8 | 4119 | F3 vs. M3 | - | Development | Cell division | cyclin binding                                                      | GO:0030332 | F | 8   | 6.61E-05 | 2.68E-03 |
| 8 | 4120 | F3 vs. M3 | - | Development | Cell division | cyclin-dependent protein kinase holoenzyme complex                  | GO:0000307 | C | 39  | 1.39E-08 | 2.55E-07 |
|   |      |           |   |             |               |                                                                     |            |   |     |          |          |
| 8 | 4121 | F3 vs. M3 | - | Development | Cell division | cyclin-dependent protein serine/threonine kinase regulator activity | GO:0016538 | F | 35  | 2.09E-07 | 2.22E-05 |
| 8 | 4122 | F3 vs. M3 | - | Development | Cell division | cytokinesis by cell plate formation                                 | GO:0000911 | P | 46  | 1.15E-06 | 3.42E-05 |
| 8 | 4123 | F3 vs. M3 | - | Development | Cell division | DNA biosynthetic process                                            | GO:0071897 | P | 15  | 3.38E-06 | 8.76E-05 |
| 8 | 4124 | F3 vs. M3 | - | Development | Cell division | DNA damage checkpoint                                               | GO:0000077 | P | 10  | 3.85E-03 | 3.34E-02 |
| 8 | 4125 | F3 vs. M3 | - | Development | Cell division | DNA duplex unwinding                                                | GO:0032508 | P | 20  | 4.80E-03 | 4.02E-02 |
| 8 | 4126 | F3 vs. M3 | - | Development | Cell division | DNA integrity checkpoint                                            | GO:0031570 | P | 17  | 2.64E-04 | 3.86E-03 |
| 8 | 4127 | F3 vs. M3 | - | Development | Cell division | DNA packaging                                                       | GO:0006323 | P | 67  | 1.72E-05 | 3.59E-04 |
| 8 | 4128 | F3 vs. M3 | - | Development | Cell division | DNA polymerase complex                                              | GO:0042575 | C | 13  | 2.59E-04 | 2.38E-03 |
| 8 | 4129 | F3 vs. M3 | - | Development | Cell division | DNA recombination                                                   | GO:0006310 | P | 94  | 2.19E-10 | 1.56E-08 |
| 8 | 4130 | F3 vs. M3 | - | Development | Cell division | DNA repair                                                          | GO:0006281 | P | 202 | 1.14E-12 | 1.47E-10 |
| 8 | 4131 | F3 vs. M3 | - | Development | Cell division | DNA repair complex                                                  | GO:1990391 | C | 14  | 2.40E-03 | 1.65E-02 |
| 8 | 4132 | F3 vs. M3 | - | Development | Cell division | DNA replication                                                     | GO:0006260 | P | 76  | 6.31E-13 | 1.00E-10 |
| 8 | 4133 | F3 vs. M3 | - | Development | Cell division | DNA replication factor A complex                                    | GO:0005662 | C | 7   | 1.24E-03 | 9.22E-03 |
| 8 | 4134 | F3 vs. M3 | - | Development | Cell division | DNA replication initiation                                          | GO:0006270 | P | 20  | 3.12E-05 | 6.06E-04 |
| 8 | 4135 | F3 vs. M3 | - | Development | Cell division | DNA replication origin binding                                      | GO:0003688 | F | 17  | 2.00E-04 | 6.69E-03 |
| 8 | 4136 | F3 vs. M3 | - | Development | Cell division | DNA strand elongation                                               | GO:0022616 | P | 13  | 5.24E-04 | 6.78E-03 |
| 8 | 4137 | F3 vs. M3 | - | Development | Cell division | DNA strand elongation involved in DNA replication                   | GO:0006271 | P | 13  | 5.24E-04 | 6.80E-03 |
| 8 | 4138 | F3 vs. M3 | - | Development | Cell division | DNA unwinding involved in DNA replication                           | GO:0006268 | P | 10  | 2.82E-03 | 2.65E-02 |
| 8 | 4139 | F3 vs. M3 | - | Development | Cell division | DNA-dependent DNA replication                                       | GO:0006261 | P | 69  | 6.64E-12 | 6.36E-10 |
| 8 | 4140 | F3 vs. M3 | - | Development | Cell division | double-strand break repair                                          | GO:0006302 | P | 82  | 1.34E-11 | 1.16E-09 |
| 8 | 4141 | F3 vs. M3 | - | Development | Cell division | double-strand break repair via homologous recombination             | GO:0000724 | P | 58  | 1.28E-06 | 3.73E-05 |
| 8 | 4142 | F3 vs. M3 | - | Development | Cell division | endonuclease activity                                               | GO:0004519 | F | 74  | 2.47E-05 | 1.25E-03 |
| 8 | 4143 | F3 vs. M3 | - | Development | Cell division | G1/S transition of mitotic cell cycle                               | GO:0000082 | P | 7   | 7.04E-04 | 8.73E-03 |
| 8 | 4144 | F3 vs. M3 | - | Development | Cell division | homologous chromosome pairing at meiosis                            | GO:0007129 | P | 20  | 7.57E-04 | 9.16E-03 |
| 8 | 4145 | F3 vs. M3 | - | Development | Cell division | homologous chromosome segregation                                   | GO:0045143 | P | 22  | 3.70E-04 | 5.04E-03 |
| 8 | 4146 | F3 vs. M3 | - | Development | Cell division | homologous recombination                                            | GO:0035825 | P | 31  | 2.96E-05 | 5.83E-04 |
| 8 | 4147 | F3 vs. M3 | - | Development | Cell division | kinetochore                                                         | GO:0000776 | C | 13  | 6.55E-04 | 5.46E-03 |
| 8 | 4148 | F3 vs. M3 | - | Development | Cell division | male meiotic nuclear division                                       | GO:0007140 | P | 16  | 1.37E-03 | 1.50E-02 |
| 8 | 4149 | F3 vs. M3 | - | Development | Cell division | meiosis I                                                           | GO:0007127 | P | 40  | 3.99E-06 | 1.02E-04 |
| 8 | 4150 | F3 vs. M3 | - | Development | Cell division | meiosis I cell cycle process                                        | GO:0061982 | P | 43  | 3.52E-07 | 1.16E-05 |
| 8 | 4151 | F3 vs. M3 | - | Development | Cell division | meiotic cell cycle                                                  | GO:0051321 | P | 102 | 2.33E-10 | 1.64E-08 |
| 8 | 4152 | F3 vs. M3 | - | Development | Cell division | meiotic cell cycle process                                          | GO:1903046 | P | 93  | 1.13E-08 | 5.39E-07 |
| 8 | 4153 | F3 vs. M3 | - | Development | Cell division | meiotic chromosome segregation                                      | GO:0045132 | P | 33  | 3.60E-05 | 6.93E-04 |
| 8 | 4154 | F3 vs. M3 | - | Development | Cell division | meiotic DNA double-strand break formation                           | GO:0042138 | P | 6   | 1.78E-03 | 1.84E-02 |
| 8 | 4155 | F3 vs. M3 | - | Development | Cell division | meiotic mismatch repair                                             | GO:0000710 | P | 4   | 5.33E-03 | 4.36E-02 |
| 8 | 4156 | F3 vs. M3 | - | Development | Cell division | meiotic nuclear division                                            | GO:0140013 | P | 59  | 2.35E-07 | 8.20E-06 |
| 8 | 4157 | F3 vs. M3 | - | Development | Cell division | microtubule cytoskeleton organization involved in mitosis           | GO:1902850 | P | 20  | 2.64E-03 | 2.51E-02 |
| 8 | 4158 | F3 vs. M3 | - | Development | Cell division | microtubule motor activity                                          | GO:0003777 | F | 39  | 5.97E-05 | 2.45E-03 |
| 8 | 4159 | F3 vs. M3 | - | Development | Cell division | mismatch repair                                                     | GO:0006298 | P | 14  | 1.43E-04 | 2.24E-03 |
| 8 | 4160 | F3 vs. M3 | - | Development | Cell division | mismatch repair complex                                             | GO:0032300 | C | 7   | 5.98E-03 | 3.58E-02 |
| 8 | 4161 | F3 vs. M3 | - | Development | Cell division | mitotic cell cycle                                                  | GO:0000278 | P | 171 | 7.31E-10 | 4.61E-08 |
| 8 | 4162 | F3 vs. M3 | - | Development | Cell division | mitotic cell cycle checkpoint                                       | GO:0007093 | P | 23  | 9.60E-04 | 1.11E-02 |
| 8 | 4163 | F3 vs. M3 | - | Development | Cell division | mitotic cell cycle phase transition                                 | GO:0044772 | P | 35  | 4.51E-10 | 2.95E-08 |
| 8 | 4164 | F3 vs. M3 | - | Development | Cell division | mitotic cell cycle process                                          | GO:1903047 | P | 146 | 1.02E-12 | 1.39E-10 |
| 8 | 4165 | F3 vs. M3 | - | Development | Cell division | mitotic DNA replication                                             | GO:1902969 | P | 7   | 2.81E-03 | 2.65E-02 |
| 8 | 4166 | F3 vs. M3 | - | Development | Cell division | mitotic nuclear division                                            | GO:0140014 | P | 44  | 6.64E-06 | 1.56E-04 |
| 8 | 4167 | F3 vs. M3 | - | Development | Cell division | mitotic sister chromatid segregation                                | GO:0000070 | P | 30  | 7.57E-04 | 9.18E-03 |
| 8 | 4168 | F3 vs. M3 | - | Development | Cell division | mitotic spindle                                                     | GO:0072686 | C | 13  | 4.76E-04 | 4.10E-03 |
| 8 | 4169 | F3 vs. M3 | - | Development | Cell division | mitotic spindle assembly                                            | GO:0090307 | P | 7   | 4.02E-03 | 3.47E-02 |
| 8 | 4170 | F3 vs. M3 | - | Development | Cell division | negative regulation of cell cycle                                   | GO:0045786 | P | 52  | 2.82E-07 | 9.66E-06 |



|   |      |           |   |             |               |                                                            |            |   |      |          |          |
|---|------|-----------|---|-------------|---------------|------------------------------------------------------------|------------|---|------|----------|----------|
| 8 | 4171 | F3 vs. M3 | - | Development | Cell division | negative regulation of cell cycle phase transition         | GO:1901988 | P | 16   | 2.96E-04 | 4.18E-03 |
| 8 | 4172 | F3 vs. M3 | - | Development | Cell division | negative regulation of cell cycle process                  | GO:0010948 | P | 34   | 4.40E-05 | 8.22E-04 |
| 8 | 4173 | F3 vs. M3 | - | Development | Cell division | negative regulation of chromosome organization             | GO:2001251 | P | 10   | 4.65E-03 | 3.91E-02 |
| 8 | 4174 | F3 vs. M3 | - | Development | Cell division | negative regulation of mitotic cell cycle                  | GO:0045930 | P | 33   | 2.54E-04 | 3.74E-03 |
| 8 | 4175 | F3 vs. M3 | - | Development | Cell division | negative regulation of mitotic cell cycle phase transition | GO:1901991 | P | 16   | 2.96E-04 | 4.19E-03 |
| 8 | 4176 | F3 vs. M3 | - | Development | Cell division | negative regulation of nuclear division                    | GO:0051784 | P | 19   | 1.20E-03 | 1.35E-02 |
| 8 | 4177 | F3 vs. M3 | - | Development | Cell division | negative regulation of reproductive process                | GO:2000242 | P | 47   | 8.53E-04 | 1.01E-02 |
| 8 | 4178 | F3 vs. M3 | - | Development | Cell division | nuclear chromosome segregation                             | GO:0098813 | P | 61   | 1.60E-07 | 5.95E-06 |
| 8 | 4179 | F3 vs. M3 | - | Development | Cell division | nuclear division                                           | GO:0000280 | P | 100  | 6.05E-12 | 5.89E-10 |
| 8 | 4180 | F3 vs. M3 | - | Development | Cell division | nuclear DNA replication                                    | GO:0033260 | P | 12   | 6.28E-04 | 7.91E-03 |
| 8 | 4181 | F3 vs. M3 | - | Development | Cell division | nuclear origin of replication recognition complex          | GO:0005664 | C | 5    | 8.95E-03 | 4.85E-02 |
| 8 | 4182 | F3 vs. M3 | - | Development | Cell division | nuclear replication fork                                   | GO:0043596 | C | 17   | 2.67E-06 | 3.36E-05 |
| 8 | 4183 | F3 vs. M3 | - | Development | Cell division | nuclease activity                                          | GO:0004518 | F | 125  | 4.08E-05 | 1.83E-03 |
| 8 | 4184 | F3 vs. M3 | - | Development | Cell division | nucleic acid metabolic process                             | GO:0090304 | P | 1036 | 0.00E+00 | 0.00E+00 |
| 8 | 4185 | F3 vs. M3 | - | Development | Cell division | nucleobase-containing compound metabolic process           | GO:0006139 | P | 1315 | 0.00E+00 | 0.00E+00 |
| 8 | 4186 | F3 vs. M3 | - | Development | Cell division | nucleosome assembly                                        | GO:0006334 | P | 32   | 2.34E-03 | 2.31E-02 |
| 8 | 4187 | F3 vs. M3 | - | Development | Cell division | nucleotide-excision repair                                 | GO:0006289 | P | 33   | 5.46E-03 | 4.44E-02 |
| 8 | 4188 | F3 vs. M3 | - | Development | Cell division | nucleotidyltransferase activity                            | GO:0016779 | F | 93   | 7.45E-04 | 1.86E-02 |
| 8 | 4189 | F3 vs. M3 | - | Development | Cell division | origin recognition complex                                 | GO:0000808 | C | 5    | 8.95E-03 | 4.83E-02 |
| 8 | 4190 | F3 vs. M3 | - | Development | Cell division | positive regulation of cell cycle                          | GO:0045787 | P | 26   | 2.80E-03 | 2.65E-02 |
| 8 | 4191 | F3 vs. M3 | - | Development | Cell division | preprophase band                                           | GO:0009574 | C | 14   | 2.85E-03 | 1.85E-02 |
| 8 | 4192 | F3 vs. M3 | - | Development | Cell division | preprophase band assembly                                  | GO:0000913 | P | 5    | 5.11E-03 | 4.24E-02 |
| 8 | 4193 | F3 vs. M3 | - | Development | Cell division | reciprocal homologous recombination                        | GO:0140527 | P | 31   | 2.96E-05 | 5.87E-04 |
| 8 | 4194 | F3 vs. M3 | - | Development | Cell division | reciprocal meiotic recombination                           | GO:0007131 | P | 31   | 2.96E-05 | 5.85E-04 |
| 8 | 4195 | F3 vs. M3 | - | Development | Cell division | recombinational repair                                     | GO:0000725 | P | 64   | 1.99E-06 | 5.50E-05 |
| 8 | 4196 | F3 vs. M3 | - | Development | Cell division | regulation of cell cycle                                   | GO:0051726 | P | 160  | 1.11E-16 | 3.08E-14 |
| 8 | 4197 | F3 vs. M3 | - | Development | Cell division | regulation of cell cycle G2/M phase transition             | GO:1902749 | P | 20   | 3.44E-05 | 6.63E-04 |
| 8 | 4198 | F3 vs. M3 | - | Development | Cell division | regulation of cell cycle phase transition                  | GO:1901987 | P | 35   | 5.52E-08 | 2.32E-06 |
| 8 | 4199 | F3 vs. M3 | - | Development | Cell division | regulation of cell cycle process                           | GO:0010564 | P | 85   | 9.68E-13 | 1.34E-10 |
| 8 | 4200 | F3 vs. M3 | - | Development | Cell division | regulation of cell division                                | GO:0051302 | P | 39   | 2.76E-04 | 4.01E-03 |
| 8 | 4201 | F3 vs. M3 | - | Development | Cell division | regulation of chromatin organization                       | GO:1902275 | P | 52   | 3.78E-03 | 3.29E-02 |
| 8 | 4202 | F3 vs. M3 | - | Development | Cell division | regulation of chromosome organization                      | GO:0033044 | P | 51   | 3.45E-06 | 8.92E-05 |
| 8 | 4203 | F3 vs. M3 | - | Development | Cell division | regulation of chromosome segregation                       | GO:0051983 | P | 14   | 4.71E-04 | 6.18E-03 |
| 8 | 4204 | F3 vs. M3 | - | Development | Cell division | regulation of chromosome separation                        | GO:1905818 | P | 13   | 1.22E-03 | 1.35E-02 |
| 8 | 4205 | F3 vs. M3 | - | Development | Cell division | regulation of cyclin-dependent protein kinase activity     | GO:1904029 | P | 36   | 2.45E-05 | 4.97E-04 |
| 8 | 4206 | F3 vs. M3 | - | Development | Cell division | regulation of DNA endoreduplication                        | GO:0032875 | P | 26   | 1.02E-03 | 1.18E-02 |
| 8 | 4207 | F3 vs. M3 | - | Development | Cell division | regulation of DNA metabolic process                        | GO:0051052 | P | 50   | 3.02E-05 | 5.93E-04 |
| 8 | 4208 | F3 vs. M3 | - | Development | Cell division | regulation of DNA replication                              | GO:0006275 | P | 38   | 1.90E-06 | 5.32E-05 |
| 8 | 4209 | F3 vs. M3 | - | Development | Cell division | regulation of DNA-dependent DNA replication                | GO:0090329 | P | 32   | 8.40E-05 | 1.44E-03 |
| 8 | 4210 | F3 vs. M3 | - | Development | Cell division | regulation of G2/M transition of mitotic cell cycle        | GO:0010389 | P | 19   | 5.96E-05 | 1.07E-03 |
| 8 | 4211 | F3 vs. M3 | - | Development | Cell division | regulation of meiotic cell cycle                           | GO:0051445 | P | 12   | 1.68E-04 | 2.59E-03 |
| 8 | 4212 | F3 vs. M3 | - | Development | Cell division | regulation of meiotic nuclear division                     | GO:0040020 | P | 9    | 1.27E-03 | 1.39E-02 |
| 8 | 4213 | F3 vs. M3 | - | Development | Cell division | regulation of metaphase/anaphase transition of cell cycle  | GO:1902099 | P | 13   | 1.22E-03 | 1.35E-02 |
| 8 | 4214 | F3 vs. M3 | - | Development | Cell division | regulation of mitotic cell cycle                           | GO:0007346 | P | 58   | 1.89E-07 | 6.82E-06 |
| 8 | 4215 | F3 vs. M3 | - | Development | Cell division | regulation of mitotic cell cycle phase transition          | GO:1901990 | P | 33   | 2.06E-07 | 7.33E-06 |
| 8 | 4216 | F3 vs. M3 | - | Development | Cell division | regulation of mitotic metaphase/anaphase transition        | GO:0030071 | P | 13   | 1.22E-03 | 1.36E-02 |
| 8 | 4217 | F3 vs. M3 | - | Development | Cell division | regulation of mitotic nuclear division                     | GO:0007088 | P | 19   | 3.75E-03 | 3.28E-02 |
| 8 | 4218 | F3 vs. M3 | - | Development | Cell division | regulation of mitotic sister chromatid separation          | GO:0010965 | P | 13   | 1.22E-03 | 1.36E-02 |
| 8 | 4219 | F3 vs. M3 | - | Development | Cell division | regulation of mitotic spindle organization                 | GO:0060236 | P | 5    | 2.53E-03 | 2.44E-02 |
| 8 | 4220 | F3 vs. M3 | - | Development | Cell division | regulation of nuclear division                             | GO:0051783 | P | 29   | 1.96E-05 | 4.03E-04 |
| 8 | 4221 | F3 vs. M3 | - | Development | Cell division | regulation of sister chromatid segregation                 | GO:0033045 | P | 14   | 4.71E-04 | 6.17E-03 |
| 8 | 4222 | F3 vs. M3 | - | Development | Cell division | regulation of spindle organization                         | GO:0090224 | P | 5    | 2.53E-03 | 2.44E-02 |
| 8 | 4223 | F3 vs. M3 | - | Development | Cell division | replication fork                                           | GO:0005657 | C | 29   | 1.63E-07 | 2.49E-06 |
| 8 | 4224 | F3 vs. M3 | - | Development | Cell division | replisome                                                  | GO:0030894 | C | 14   | 6.04E-07 | 8.44E-06 |
| 8 | 4225 | F3 vs. M3 | - | Development | Cell division | RNA metabolic process                                      | GO:0016070 | P | 781  | 0.00E+00 | 0.00E+00 |
| 8 | 4226 | F3 vs. M3 | - | Development | Cell division | SCF ubiquitin ligase complex                               | GO:0019005 | C | 49   | 6.39E-03 | 3.77E-02 |
| 8 | 4227 | F3 vs. M3 | - | Development | Cell division | single-stranded DNA binding                                | GO:0003697 | F | 50   | 1.70E-07 | 1.95E-05 |
| 8 | 4228 | F3 vs. M3 | - | Development | Cell division | sister chromatid cohesion                                  | GO:0007062 | P | 25   | 2.87E-03 | 2.68E-02 |
| 8 | 4229 | F3 vs. M3 | - | Development | Cell division | sister chromatid segregation                               | GO:0000819 | P | 38   | 8.87E-05 | 1.51E-03 |
| 8 | 4230 | F3 vs. M3 | - | Development | Cell division | spindle                                                    | GO:0005819 | C | 47   | 5.14E-08 | 8.64E-07 |
| 8 | 4231 | F3 vs. M3 | - | Development | Cell division | spindle assembly                                           | GO:0051225 | P | 27   | 7.27E-05 | 1.28E-03 |
| 8 | 4232 | F3 vs. M3 | - | Development | Cell division | spindle microtubule                                        | GO:0005876 | C | 13   | 5.15E-04 | 4.37E-03 |
| 8 | 4233 | F3 vs. M3 | - | Development | Cell division | spindle organization                                       | GO:0007051 | P | 40   | 2.52E-05 | 5.09E-04 |
| 8 | 4234 | F3 vs. M3 | - | Development | Cell division | telomere maintenance                                       | GO:0000723 | P | 20   | 2.00E-04 | 3.02E-03 |



|   |      |           |   |             |               |                                                             |            |   |      |          |          |
|---|------|-----------|---|-------------|---------------|-------------------------------------------------------------|------------|---|------|----------|----------|
| 8 | 4235 | F3 vs. M3 | - | Development | Cell division | telomere maintenance via telomerase                         | GO:0007004 | P | 6    | 8.54E-04 | 1.01E-02 |
| 8 | 4236 | F3 vs. M3 | - | Development | Cell division | telomere maintenance via telomere lengthening               | GO:0010833 | P | 6    | 8.54E-04 | 1.01E-02 |
| 8 | 4237 | F3 vs. M3 | - | Development | Cell division | telomere organization                                       | GO:0032200 | P | 20   | 2.00E-04 | 3.01E-03 |
| 8 | 4238 | F3 vs. M3 | - | Development | Development   | anatomical structure homeostasis                            | GO:0060249 | P | 22   | 1.23E-04 | 1.99E-03 |
| 8 | 4239 | F3 vs. M3 | - | Development | Development   | anther wall tapetum development                             | GO:0048658 | P | 10   | 1.21E-03 | 1.35E-02 |
| 8 | 4240 | F3 vs. M3 | - | Development | Development   | cellular component assembly                                 | GO:0022607 | P | 535  | 3.25E-05 | 6.29E-04 |
| 8 | 4241 | F3 vs. M3 | - | Development | Development   | cellular component biogenesis                               | GO:0044085 | P | 852  | 6.48E-05 | 1.15E-03 |
| 8 | 4242 | F3 vs. M3 | - | Development | Development   | cellular component organization                             | GO:0016043 | P | 1531 | 4.08E-03 | 3.51E-02 |
| 8 | 4243 | F3 vs. M3 | - | Development | Development   | cellular component organization or biogenesis               | GO:0071840 | P | 1796 | 2.95E-04 | 4.19E-03 |
| 8 | 4244 | F3 vs. M3 | - | Development | Development   | chromatin                                                   | GO:0000785 | C | 203  | 2.40E-04 | 2.23E-03 |
| 8 | 4245 | F3 vs. M3 | - | Development | Development   | chromatin assembly or disassembly                           | GO:0006333 | P | 61   | 1.10E-04 | 1.83E-03 |
| 8 | 4246 | F3 vs. M3 | - | Development | Development   | chromatin organization                                      | GO:0006325 | P | 215  | 2.86E-10 | 1.99E-08 |
| 8 | 4247 | F3 vs. M3 | - | Development | Development   | chromocenter                                                | GO:0010369 | C | 9    | 8.83E-03 | 4.81E-02 |
| 8 | 4248 | F3 vs. M3 | - | Development | Development   | chromosomal region                                          | GO:0098687 | C | 39   | 5.77E-07 | 8.29E-06 |
| 8 | 4249 | F3 vs. M3 | - | Development | Development   | chromosome organization                                     | GO:0051276 | P | 315  | 0.00E+00 | 0.00E+00 |
| 8 | 4250 | F3 vs. M3 | - | Development | Development   | chromosome, telomeric region                                | GO:0000781 | C | 12   | 4.65E-03 | 2.87E-02 |
| 8 | 4251 | F3 vs. M3 | - | Development | Development   | intracellular non-membrane-bounded organelle                | GO:0043232 | C | 1125 | 0.00E+00 | 0.00E+00 |
| 8 | 4252 | F3 vs. M3 | - | Development | Development   | intracellular organelle lumen                               | GO:0070013 | C | 871  | 0.00E+00 | 0.00E+00 |
| 8 | 4253 | F3 vs. M3 | - | Development | Development   | kinetochore microtubule                                     | GO:0005828 | C | 5    | 7.93E-03 | 4.40E-02 |
| 8 | 4254 | F3 vs. M3 | - | Development | Development   | membrane-enclosed lumen                                     | GO:0031974 | C | 871  | 0.00E+00 | 0.00E+00 |
| 8 | 4255 | F3 vs. M3 | - | Development | Development   | microtubule                                                 | GO:0005874 | C | 94   | 1.14E-04 | 1.12E-03 |
| 8 | 4256 | F3 vs. M3 | - | Development | Development   | microtubule associated complex                              | GO:0005875 | C | 47   | 1.63E-07 | 2.53E-06 |
| 8 | 4257 | F3 vs. M3 | - | Development | Development   | microtubule cytoskeleton                                    | GO:0015630 | C | 136  | 6.89E-07 | 9.50E-06 |
| 8 | 4258 | F3 vs. M3 | - | Development | Development   | microtubule cytoskeleton organization                       | GO:0000226 | P | 110  | 6.00E-04 | 7.69E-03 |
| 8 | 4259 | F3 vs. M3 | - | Development | Development   | microtubule-based movement                                  | GO:0007018 | P | 39   | 5.97E-05 | 1.07E-03 |
| 8 | 4260 | F3 vs. M3 | - | Development | Development   | microtubule-based process                                   | GO:0007017 | P | 148  | 1.41E-07 | 5.39E-06 |
| 8 | 4261 | F3 vs. M3 | - | Development | Development   | non-membrane-bounded organelle                              | GO:0043228 | C | 1125 | 0.00E+00 | 0.00E+00 |
| 8 | 4262 | F3 vs. M3 | - | Development | Development   | nuclear body                                                | GO:0016604 | C | 68   | 1.05E-03 | 7.97E-03 |
| 8 | 4263 | F3 vs. M3 | - | Development | Development   | nuclear chromatin                                           | GO:0000790 | C | 154  | 8.86E-04 | 6.87E-03 |
| 8 | 4264 | F3 vs. M3 | - | Development | Development   | nuclear chromosome                                          | GO:0000228 | C | 210  | 5.47E-11 | 1.39E-09 |
| 8 | 4265 | F3 vs. M3 | - | Development | Development   | nuclear lumen                                               | GO:0031981 | C | 771  | 0.00E+00 | 0.00E+00 |
| 8 | 4266 | F3 vs. M3 | - | Development | Development   | nuclear replisome                                           | GO:0043601 | C | 14   | 6.04E-07 | 8.56E-06 |
| 8 | 4267 | F3 vs. M3 | - | Development | Development   | nucleic acid phosphodiester bond hydrolysis                 | GO:0090305 | P | 55   | 4.24E-05 | 8.00E-04 |
| 8 | 4268 | F3 vs. M3 | - | Development | Development   | nucleoplasm                                                 | GO:0005654 | C | 275  | 2.61E-09 | 5.62E-08 |
| 8 | 4269 | F3 vs. M3 | - | Development | Development   | nucleus                                                     | GO:0005634 | C | 5493 | 0.00E+00 | 0.00E+00 |
| 8 | 4270 | F3 vs. M3 | - | Development | Development   | organelle assembly                                          | GO:0070925 | P | 124  | 5.26E-05 | 9.58E-04 |
| 8 | 4271 | F3 vs. M3 | - | Development | Development   | organelle fission                                           | GO:0048285 | P | 130  | 7.12E-11 | 5.49E-09 |
| 8 | 4272 | F3 vs. M3 | - | Development | Development   | organelle lumen                                             | GO:0043233 | C | 871  | 0.00E+00 | 0.00E+00 |
| 8 | 4273 | F3 vs. M3 | - | Development | Development   | organelle organization                                      | GO:0006996 | P | 1061 | 2.08E-07 | 7.35E-06 |
| 8 | 4274 | F3 vs. M3 | - | Development | Development   | phragmoplast                                                | GO:0009524 | C | 44   | 3.24E-06 | 4.01E-05 |
| 8 | 4275 | F3 vs. M3 | - | Development | Development   | polymeric cytoskeletal fiber                                | GO:0099513 | C | 102  | 2.55E-03 | 1.69E-02 |
| 8 | 4276 | F3 vs. M3 | - | Metabolism  | Bioenergetics | ADP binding                                                 | GO:0043531 | F | 73   | 5.70E-04 | 1.53E-02 |
| 8 | 4277 | F3 vs. M3 | - | Metabolism  | Bioenergetics | ATP-dependent microtubule motor activity, plus-end-directed | GO:0008574 | F | 11   | 1.88E-03 | 3.88E-02 |
| 8 | 4278 | F3 vs. M3 | - | Metabolism  | Bioenergetics | DNA-dependent ATPase activity                               | GO:0008094 | F | 71   | 1.91E-05 | 1.06E-03 |
| 8 | 4279 | F3 vs. M3 | - | Metabolism  | Bioenergetics | positive regulation of ATPase activity                      | GO:0032781 | P | 9    | 2.33E-03 | 2.31E-02 |
| 8 | 4280 | F3 vs. M3 | - | Metabolism  | Catabolism    | Cul4-RING E3 ubiquitin ligase complex                       | GO:0080008 | C | 87   | 6.16E-03 | 3.66E-02 |
| 8 | 4281 | F3 vs. M3 | - | Metabolism  | Catabolism    | cullin-RING ubiquitin ligase complex                        | GO:0031461 | C | 155  | 6.13E-06 | 7.33E-05 |
| 8 | 4282 | F3 vs. M3 | - | Metabolism  | Catabolism    | endoribonuclease activity                                   | GO:0004521 | F | 47   | 1.26E-03 | 2.73E-02 |
| 8 | 4283 | F3 vs. M3 | - | Metabolism  | Catabolism    | modification-dependent macromolecule catabolic process      | GO:0043632 | P | 307  | 9.67E-04 | 1.12E-02 |
| 8 | 4284 | F3 vs. M3 | - | Metabolism  | Catabolism    | modification-dependent protein catabolic process            | GO:0019941 | P | 300  | 1.75E-03 | 1.82E-02 |
| 8 | 4285 | F3 vs. M3 | - | Metabolism  | Catabolism    | peptidase complex                                           | GO:1905368 | C | 66   | 6.01E-04 | 5.05E-03 |
| 8 | 4286 | F3 vs. M3 | - | Metabolism  | Catabolism    | protein-containing complex                                  | GO:0032991 | C | 1909 | 0.00E+00 | 0.00E+00 |
| 8 | 4287 | F3 vs. M3 | - | Metabolism  | Catabolism    | RNA phosphodiester bond hydrolysis, endonucleolytic         | GO:0090502 | P | 17   | 5.28E-03 | 4.35E-02 |
| 8 | 4288 | F3 vs. M3 | - | Metabolism  | Catabolism    | ubiquitin ligase complex                                    | GO:0000151 | C | 203  | 3.63E-06 | 4.45E-05 |
| 8 | 4289 | F3 vs. M3 | - | Metabolism  | Catabolism    | ubiquitin-dependent protein catabolic process               | GO:0006511 | P | 296  | 2.17E-03 | 2.18E-02 |
| 8 | 4290 | F3 vs. M3 | - | Metabolism  | Metabolism    | catalytic activity, acting on DNA                           | GO:0140097 | F | 113  | 5.41E-07 | 4.86E-05 |
| 8 | 4291 | F3 vs. M3 | - | Metabolism  | Metabolism    | catalytic complex                                           | GO:1902494 | C | 755  | 1.53E-10 | 3.61E-09 |
| 8 | 4292 | F3 vs. M3 | - | Metabolism  | Metabolism    | cellular aromatic compound metabolic process                | GO:0006725 | P | 1592 | 4.98E-08 | 2.11E-06 |
| 8 | 4293 | F3 vs. M3 | - | Metabolism  | Metabolism    | cellular macromolecule biosynthetic process                 | GO:0034645 | P | 813  | 4.78E-07 | 1.54E-05 |
| 8 | 4294 | F3 vs. M3 | - | Metabolism  | Metabolism    | cellular macromolecule metabolic process                    | GO:0044260 | P | 2641 | 7.45E-08 | 3.06E-06 |
| 8 | 4295 | F3 vs. M3 | - | Metabolism  | Metabolism    | cellular nitrogen compound metabolic process                | GO:0034641 | P | 1834 | 4.09E-12 | 4.28E-10 |
| 8 | 4296 | F3 vs. M3 | - | Metabolism  | Metabolism    | cellular protein metabolic process                          | GO:0044267 | P | 1999 | 2.09E-04 | 3.13E-03 |
| 8 | 4297 | F3 vs. M3 | - | Metabolism  | Metabolism    | cellular protein modification process                       | GO:0006464 | P | 1439 | 1.59E-03 | 1.68E-02 |
| 8 | 4298 | F3 vs. M3 | - | Metabolism  | Metabolism    | cellular protein-containing complex assembly                | GO:0034622 | P | 308  | 4.27E-04 | 5.70E-03 |

|   |      |           |   |            |                      |                                                                         |            |   |      |          |          |
|---|------|-----------|---|------------|----------------------|-------------------------------------------------------------------------|------------|---|------|----------|----------|
| 8 | 4299 | F3 vs. M3 | - | Metabolism | Metabolism           | chromatin binding                                                       | GO:0003682 | F | 116  | 4.62E-04 | 1.29E-02 |
| 8 | 4300 | F3 vs. M3 | - | Metabolism | Metabolism           | deoxyribonuclease activity                                              | GO:0004536 | F | 25   | 2.88E-04 | 8.91E-03 |
| 8 | 4301 | F3 vs. M3 | - | Metabolism | Metabolism           | DNA binding                                                             | GO:0003677 | F | 893  | 4.20E-09 | 6.35E-07 |
| 8 | 4302 | F3 vs. M3 | - | Metabolism | Metabolism           | DNA metabolic process                                                   | GO:0006259 | P | 276  | 0.00E+00 | 0.00E+00 |
| 8 | 4303 | F3 vs. M3 | - | Metabolism | Metabolism           | DNA secondary structure binding                                         | GO:0000217 | F | 27   | 8.97E-06 | 5.60E-04 |
| 8 | 4304 | F3 vs. M3 | - | Metabolism | Metabolism           | double-stranded DNA binding                                             | GO:0003690 | F | 452  | 2.04E-03 | 4.14E-02 |
| 8 | 4305 | F3 vs. M3 | - | Metabolism | Metabolism           | heterocycle metabolic process                                           | GO:0046483 | P | 1511 | 2.68E-12 | 3.04E-10 |
| 8 | 4306 | F3 vs. M3 | - | Metabolism | Metabolism           | lysine N-methyltransferase activity                                     | GO:0016278 | F | 29   | 2.38E-05 | 1.22E-03 |
| 8 | 4307 | F3 vs. M3 | - | Metabolism | Metabolism           | macromolecule biosynthetic process                                      | GO:0009059 | P | 851  | 3.03E-05 | 5.93E-04 |
| 8 | 4308 | F3 vs. M3 | - | Metabolism | Metabolism           | macromolecule metabolic process                                         | GO:0043170 | P | 3292 | 1.78E-12 | 2.06E-10 |
| 8 | 4309 | F3 vs. M3 | - | Metabolism | Metabolism           | microtubule binding                                                     | GO:0008017 | F | 97   | 7.68E-08 | 9.60E-06 |
| 8 | 4310 | F3 vs. M3 | - | Metabolism | Metabolism           | microtubule depolymerization                                            | GO:0007019 | P | 4    | 2.25E-03 | 2.25E-02 |
| 8 | 4311 | F3 vs. M3 | - | Metabolism | Metabolism           | nitrogen compound metabolic process                                     | GO:0006807 | P | 3759 | 1.33E-04 | 2.12E-03 |
| 8 | 4312 | F3 vs. M3 | - | Metabolism | Metabolism           | N-methyltransferase activity                                            | GO:0008170 | F | 50   | 2.89E-05 | 1.41E-03 |
| 8 | 4313 | F3 vs. M3 | - | Metabolism | Metabolism           | nucleic acid binding                                                    | GO:0003676 | F | 1952 | 9.37E-10 | 1.58E-07 |
| 8 | 4314 | F3 vs. M3 | - | Metabolism | Metabolism           | organic cyclic compound binding                                         | GO:0097159 | F | 2827 | 2.33E-03 | 4.59E-02 |
| 8 | 4315 | F3 vs. M3 | - | Metabolism | Metabolism           | organic cyclic compound metabolic process                               | GO:1901360 | P | 1659 | 3.30E-07 | 1.10E-05 |
| 8 | 4316 | F3 vs. M3 | - | Metabolism | Metabolism           | protein metabolic process                                               | GO:0019538 | P | 2100 | 1.29E-03 | 1.42E-02 |
| 8 | 4317 | F3 vs. M3 | - | Metabolism | Metabolism           | pseudouridine synthesis                                                 | GO:0001522 | P | 16   | 1.73E-03 | 1.80E-02 |
| 8 | 4318 | F3 vs. M3 | - | Metabolism | Metabolism           | Sm-like protein family complex                                          | GO:0120114 | C | 52   | 1.76E-08 | 3.18E-07 |
| 8 | 4319 | F3 vs. M3 | - | Metabolism | Metabolism           | supramolecular complex                                                  | GO:0099080 | C | 165  | 4.06E-04 | 3.60E-03 |
| 8 | 4320 | F3 vs. M3 | - | Metabolism | Metabolism           | supramolecular fiber                                                    | GO:0099512 | C | 102  | 2.55E-03 | 1.68E-02 |
| 8 | 4321 | F3 vs. M3 | - | Metabolism | Metabolism           | supramolecular polymer                                                  | GO:0099081 | C | 102  | 2.55E-03 | 1.70E-02 |
| 8 | 4322 | F3 vs. M3 | - | Metabolism | Metabolism           | transferase complex                                                     | GO:1990234 | C | 439  | 1.11E-16 | 4.08E-15 |
| 8 | 4323 | F3 vs. M3 | - | Metabolism | Metabolism           | transferase complex, transferring phosphorus-containing groups          | GO:0061695 | C | 143  | 3.55E-15 | 1.17E-13 |
| 8 | 4324 | F3 vs. M3 | - | Metabolism | Metabolism           | tubulin binding                                                         | GO:0015631 | F | 102  | 4.10E-07 | 3.93E-05 |
| 8 | 4325 | F3 vs. M3 | - | Metabolism | Transporters         | kinesin complex                                                         | GO:0005871 | C | 21   | 5.01E-04 | 4.28E-03 |
| 8 | 4326 | F3 vs. M3 | - | Metabolism | Transporters         | nuclear export                                                          | GO:0051168 | P | 45   | 1.52E-03 | 1.63E-02 |
| 8 | 4327 | F3 vs. M3 | - | Metabolism | Transporters         | nuclear microtubule                                                     | GO:0005880 | C | 9    | 3.15E-03 | 2.01E-02 |
| 8 | 4328 | F3 vs. M3 | - | Metabolism | Transporters         | nucleic acid transport                                                  | GO:0050657 | P | 47   | 2.82E-04 | 4.06E-03 |
| 8 | 4329 | F3 vs. M3 | - | Metabolism | Transporters         | protein export from nucleus                                             | GO:0006611 | P | 39   | 2.57E-03 | 2.46E-02 |
| 8 | 4330 | F3 vs. M3 | - | Metabolism | Transporters         | RNA transport                                                           | GO:0050658 | P | 47   | 2.82E-04 | 4.07E-03 |
| 8 | 4331 | F3 vs. M3 | - | Regulation | Protein modification | methylation                                                             | GO:0032259 | P | 139  | 7.40E-05 | 1.30E-03 |
| 8 | 4332 | F3 vs. M3 | - | Regulation | Protein modification | protein alkylation                                                      | GO:0008213 | P | 54   | 2.49E-06 | 6.75E-05 |
| 8 | 4333 | F3 vs. M3 | - | Regulation | Protein modification | protein deubiquitination                                                | GO:0016579 | P | 39   | 2.54E-03 | 2.44E-02 |
| 8 | 4334 | F3 vs. M3 | - | Regulation | Protein modification | protein heterodimerization activity                                     | GO:0046982 | F | 86   | 3.89E-07 | 3.86E-05 |
| 8 | 4335 | F3 vs. M3 | - | Regulation | Protein modification | protein methylation                                                     | GO:0006479 | P | 54   | 2.49E-06 | 6.78E-05 |
| 8 | 4336 | F3 vs. M3 | - | Regulation | Protein modification | protein methyltransferase activity                                      | GO:0008276 | F | 46   | 2.87E-05 | 1.42E-03 |
| 8 | 4337 | F3 vs. M3 | - | Regulation | Protein modification | protein-lysine N-methyltransferase activity                             | GO:0016279 | F | 29   | 2.38E-05 | 1.25E-03 |
| 8 | 4338 | F3 vs. M3 | - | Regulation | Protein modification | regulation of protein metabolic process                                 | GO:0051246 | P | 256  | 1.12E-04 | 1.84E-03 |
| 8 | 4339 | F3 vs. M3 | - | Regulation | Protein modification | peptidyl-amino acid modification                                        | GO:0018193 | P | 239  | 5.49E-03 | 4.44E-02 |
| 8 | 4340 | F3 vs. M3 | - | Regulation | Protein modification | peptidyl-lysine modification                                            | GO:0018205 | P | 86   | 2.99E-07 | 1.01E-05 |
| 8 | 4341 | F3 vs. M3 | - | Regulation | Protein modification | positive regulation of protein modification process                     | GO:0031401 | P | 45   | 3.83E-03 | 3.34E-02 |
| 8 | 4342 | F3 vs. M3 | - | Regulation | Protein modification | protein modification by small protein conjugation or removal            | GO:0070647 | P | 434  | 4.12E-03 | 3.53E-02 |
| 8 | 4343 | F3 vs. M3 | - | Regulation | Protein modification | protein modification by small protein removal                           | GO:0070646 | P | 53   | 5.02E-04 | 6.54E-03 |
| 8 | 4344 | F3 vs. M3 | - | Regulation | Protein modification | protein modification process                                            | GO:0036211 | P | 1439 | 1.59E-03 | 1.69E-02 |
| 8 | 4345 | F3 vs. M3 | - | Regulation | Protein modification | protein-containing complex assembly                                     | GO:0065003 | P | 346  | 3.54E-03 | 3.18E-02 |
| 8 | 4346 | F3 vs. M3 | - | Regulation | Protein modification | protein-containing complex localization                                 | GO:0031503 | P | 43   | 6.92E-04 | 8.62E-03 |
| 8 | 4347 | F3 vs. M3 | - | Regulation | Protein modification | protein-containing complex subunit organization                         | GO:0043933 | P | 399  | 6.18E-03 | 4.92E-02 |
| 8 | 4348 | F3 vs. M3 | - | Regulation | Protein modification | regulation of protein modification process                              | GO:0031399 | P | 128  | 1.30E-04 | 2.09E-03 |
| 8 | 4349 | F3 vs. M3 | - | Regulation | Regulation           | negative regulation of biological process                               | GO:0048519 | P | 692  | 1.33E-05 | 2.86E-04 |
| 8 | 4350 | F3 vs. M3 | - | Regulation | Regulation           | negative regulation of cellular macromolecule biosynthetic process      | GO:2000113 | P | 203  | 2.93E-03 | 2.69E-02 |
| 8 | 4351 | F3 vs. M3 | - | Regulation | Regulation           | negative regulation of cellular process                                 | GO:0048523 | P | 457  | 2.86E-03 | 2.67E-02 |
| 8 | 4352 | F3 vs. M3 | - | Regulation | Regulation           | negative regulation of macromolecule biosynthetic process               | GO:0010558 | P | 205  | 2.99E-03 | 2.74E-02 |
| 8 | 4353 | F3 vs. M3 | - | Regulation | Regulation           | negative regulation of macromolecule metabolic process                  | GO:0010605 | P | 372  | 2.96E-08 | 1.33E-06 |
| 8 | 4354 | F3 vs. M3 | - | Regulation | Regulation           | negative regulation of metabolic process                                | GO:0009892 | P | 408  | 4.79E-06 | 1.18E-04 |
| 8 | 4355 | F3 vs. M3 | - | Regulation | Regulation           | negative regulation of nitrogen compound metabolic process              | GO:0051172 | P | 249  | 6.24E-04 | 7.88E-03 |
| 8 | 4356 | F3 vs. M3 | - | Regulation | Regulation           | negative regulation of nucleobase-containing compound metabolic process | GO:0045934 | P | 187  | 2.48E-04 | 3.66E-03 |
| 8 | 4357 | F3 vs. M3 | - | Regulation | Regulation           | positive regulation of biological process                               | GO:0048518 | P | 744  | 3.45E-04 | 4.80E-03 |
| 8 | 4358 | F3 vs. M3 | - | Regulation | Regulation           | positive regulation of cellular metabolic process                       | GO:0031325 | P | 447  | 2.89E-03 | 2.68E-02 |
| 8 | 4359 | F3 vs. M3 | - | Regulation | Regulation           | positive regulation of cellular process                                 | GO:0048522 | P | 602  | 1.47E-03 | 1.59E-02 |

|   |      |           |   |            |               |                                                                         |            |   |      |          |          |
|---|------|-----------|---|------------|---------------|-------------------------------------------------------------------------|------------|---|------|----------|----------|
| 8 | 4360 | F3 vs. M3 | - | Regulation | Regulation    | positive regulation of macromolecule biosynthetic process               | GO:0010557 | P | 311  | 2.94E-03 | 2.70E-02 |
| 8 | 4361 | F3 vs. M3 | - | Regulation | Regulation    | positive regulation of macromolecule metabolic process                  | GO:0010604 | P | 432  | 5.35E-05 | 9.67E-04 |
| 8 | 4362 | F3 vs. M3 | - | Regulation | Regulation    | positive regulation of metabolic process                                | GO:0009893 | P | 480  | 1.68E-03 | 1.76E-02 |
| 8 | 4363 | F3 vs. M3 | - | Regulation | Regulation    | positive regulation of nitrogen compound metabolic process              | GO:0051173 | P | 420  | 8.30E-04 | 9.89E-03 |
|   |      |           |   |            |               | positive regulation of nucleobase-containing compound metabolic process |            |   |      |          |          |
| 8 | 4364 | F3 vs. M3 | - | Regulation | Regulation    | process                                                                 | GO:0045935 | P | 306  | 3.68E-03 | 3.27E-02 |
| 8 | 4365 | F3 vs. M3 | - | Regulation | Regulation    | regulation of biological process                                        | GO:0050789 | P | 3004 | 2.63E-03 | 2.50E-02 |
| 8 | 4366 | F3 vs. M3 | - | Regulation | Regulation    | regulation of biosynthetic process                                      | GO:0009889 | P | 1332 | 2.66E-06 | 7.07E-05 |
| 8 | 4367 | F3 vs. M3 | - | Regulation | Regulation    | regulation of cellular biosynthetic process                             | GO:0031326 | P | 1303 | 1.26E-06 | 3.70E-05 |
| 8 | 4368 | F3 vs. M3 | - | Regulation | Regulation    | regulation of cellular macromolecule biosynthetic process               | GO:2000112 | P | 1228 | 5.95E-09 | 3.06E-07 |
| 8 | 4369 | F3 vs. M3 | - | Regulation | Regulation    | regulation of cellular metabolic process                                | GO:0031323 | P | 1626 | 3.89E-07 | 1.26E-05 |
| 8 | 4370 | F3 vs. M3 | - | Regulation | Regulation    | regulation of cellular protein metabolic process                        | GO:0032268 | P | 243  | 2.84E-04 | 4.07E-03 |
| 8 | 4371 | F3 vs. M3 | - | Regulation | Regulation    | regulation of cutin biosynthetic process                                | GO:1901957 | P | 5    | 1.69E-03 | 1.76E-02 |
| 8 | 4372 | F3 vs. M3 | - | Regulation | Regulation    | regulation of flower development                                        | GO:0009909 | P | 103  | 5.83E-03 | 4.65E-02 |
| 8 | 4373 | F3 vs. M3 | - | Regulation | Regulation    | regulation of macromolecule biosynthetic process                        | GO:0010556 | P | 1238 | 5.40E-09 | 2.83E-07 |
| 8 | 4374 | F3 vs. M3 | - | Regulation | Regulation    | regulation of macromolecule metabolic process                           | GO:0060255 | P | 1650 | 6.77E-15 | 1.50E-12 |
| 8 | 4375 | F3 vs. M3 | - | Regulation | Regulation    | regulation of meristem structural organization                          | GO:0009934 | P | 14   | 2.26E-03 | 2.25E-02 |
| 8 | 4376 | F3 vs. M3 | - | Regulation | Regulation    | regulation of metabolic process                                         | GO:0019222 | P | 1836 | 3.04E-09 | 1.69E-07 |
| 8 | 4377 | F3 vs. M3 | - | Regulation | Regulation    | regulation of multicellular organismal development                      | GO:2000026 | P | 234  | 4.56E-03 | 3.84E-02 |
| 8 | 4378 | F3 vs. M3 | - | Regulation | Regulation    | regulation of nitrogen compound metabolic process                       | GO:0051171 | P | 1470 | 2.03E-09 | 1.18E-07 |
|   |      |           |   |            |               |                                                                         |            |   |      |          |          |
| 8 | 4379 | F3 vs. M3 | - | Regulation | Regulation    | regulation of nucleobase-containing compound metabolic process          | GO:0019219 | P | 1217 | 9.03E-09 | 4.48E-07 |
| 8 | 4380 | F3 vs. M3 | - | Regulation | Regulation    | regulation of organelle organization                                    | GO:0033043 | P | 136  | 2.68E-06 | 7.04E-05 |
| 8 | 4381 | F3 vs. M3 | - | Regulation | Regulation    | regulation of phosphate metabolic process                               | GO:0019220 | P | 98   | 3.72E-03 | 3.28E-02 |
| 8 | 4382 | F3 vs. M3 | - | Regulation | Regulation    | regulation of phosphorus metabolic process                              | GO:0051174 | P | 99   | 5.11E-03 | 4.24E-02 |
| 8 | 4383 | F3 vs. M3 | - | Regulation | Regulation    | regulation of post-embryonic development                                | GO:0048580 | P | 223  | 2.45E-03 | 2.39E-02 |
| 8 | 4384 | F3 vs. M3 | - | Regulation | Regulation    | regulation of primary metabolic process                                 | GO:0080090 | P | 1524 | 1.22E-08 | 5.74E-07 |
| 8 | 4385 | F3 vs. M3 | - | Regulation | Regulation    | regulation of transferase activity                                      | GO:0051338 | P | 69   | 3.81E-06 | 9.80E-05 |
| 8 | 4386 | F3 vs. M3 | - | Regulation | Transcription | 5'-3' RNA polymerase activity                                           | GO:0034062 | F | 33   | 6.42E-04 | 1.66E-02 |
|   |      |           |   |            |               | chromatin organization involved in negative regulation of transcription |            |   |      |          |          |
| 8 | 4387 | F3 vs. M3 | - | Regulation | Transcription | transcription                                                           | GO:0097549 | P | 49   | 9.97E-06 | 2.21E-04 |
| 8 | 4388 | F3 vs. M3 | - | Regulation | Transcription | chromatin organization involved in regulation of transcription          | GO:0034401 | P | 49   | 9.97E-06 | 2.20E-04 |
| 8 | 4389 | F3 vs. M3 | - | Regulation | Transcription | chromatin remodeling                                                    | GO:0006338 | P | 54   | 1.22E-03 | 1.36E-02 |
| 8 | 4390 | F3 vs. M3 | - | Regulation | Transcription | chromatin silencing                                                     | GO:0006342 | P | 30   | 5.83E-05 | 1.05E-03 |
| 8 | 4391 | F3 vs. M3 | - | Regulation | Transcription | covalent chromatin modification                                         | GO:0016569 | P | 100  | 5.99E-06 | 1.42E-04 |
| 8 | 4392 | F3 vs. M3 | - | Regulation | Transcription | DNA conformation change                                                 | GO:0071103 | P | 95   | 8.77E-07 | 2.62E-05 |
| 8 | 4393 | F3 vs. M3 | - | Regulation | Transcription | DNA geometric change                                                    | GO:0032392 | P | 21   | 5.48E-03 | 4.44E-02 |
| 8 | 4394 | F3 vs. M3 | - | Regulation | Transcription | DNA-directed RNA polymerase complex                                     | GO:0000428 | C | 78   | 6.96E-06 | 8.13E-05 |
| 8 | 4395 | F3 vs. M3 | - | Regulation | Transcription | dsRNA processing                                                        | GO:0031050 | P | 37   | 8.34E-07 | 2.52E-05 |
| 8 | 4396 | F3 vs. M3 | - | Regulation | Transcription | gene expression                                                         | GO:0010467 | P | 1013 | 0.00E+00 | 0.00E+00 |
| 8 | 4397 | F3 vs. M3 | - | Regulation | Transcription | gene silencing                                                          | GO:0016458 | P | 112  | 6.91E-11 | 5.40E-09 |
| 8 | 4398 | F3 vs. M3 | - | Regulation | Transcription | gene silencing by miRNA                                                 | GO:0035195 | P | 22   | 1.81E-03 | 1.86E-02 |
| 8 | 4399 | F3 vs. M3 | - | Regulation | Transcription | gene silencing by RNA                                                   | GO:0031047 | P | 72   | 4.28E-08 | 1.84E-06 |
| 8 | 4400 | F3 vs. M3 | - | Regulation | Transcription | gene silencing by RNA-directed DNA methylation                          | GO:0080188 | P | 18   | 1.73E-03 | 1.80E-02 |
| 8 | 4401 | F3 vs. M3 | - | Regulation | Transcription | H4 histone acetyltransferase complex                                    | GO:1902562 | C | 11   | 7.54E-03 | 4.38E-02 |
| 8 | 4402 | F3 vs. M3 | - | Regulation | Transcription | histone binding                                                         | GO:0042393 | F | 70   | 5.45E-05 | 2.30E-03 |
| 8 | 4403 | F3 vs. M3 | - | Regulation | Transcription | histone H3-K27 methylation                                              | GO:0070734 | P | 7    | 3.05E-03 | 2.79E-02 |
| 8 | 4404 | F3 vs. M3 | - | Regulation | Transcription | histone lysine methylation                                              | GO:0034968 | P | 32   | 7.82E-05 | 1.36E-03 |
| 8 | 4405 | F3 vs. M3 | - | Regulation | Transcription | histone methylation                                                     | GO:0016571 | P | 40   | 7.54E-06 | 1.74E-04 |
| 8 | 4406 | F3 vs. M3 | - | Regulation | Transcription | histone methyltransferase activity                                      | GO:0042054 | F | 27   | 5.59E-06 | 3.83E-04 |
| 8 | 4407 | F3 vs. M3 | - | Regulation | Transcription | histone methyltransferase activity (H3-K36 specific)                    | GO:0046975 | F | 4    | 2.56E-03 | 4.91E-02 |
| 8 | 4408 | F3 vs. M3 | - | Regulation | Transcription | histone modification                                                    | GO:0016570 | P | 97   | 1.05E-05 | 2.29E-04 |
| 8 | 4409 | F3 vs. M3 | - | Regulation | Transcription | histone-lysine N-methyltransferase activity                             | GO:0018024 | F | 20   | 2.25E-05 | 1.22E-03 |
| 8 | 4410 | F3 vs. M3 | - | Regulation | Transcription | macromolecule methylation                                               | GO:0043414 | P | 108  | 5.46E-07 | 1.71E-05 |
| 8 | 4411 | F3 vs. M3 | - | Regulation | Transcription | macromolecule modification                                              | GO:0043412 | P | 1617 | 5.29E-07 | 1.68E-05 |
| 8 | 4412 | F3 vs. M3 | - | Regulation | Transcription | maintenance of DNA repeat elements                                      | GO:0043570 | P | 6    | 3.07E-03 | 2.80E-02 |
| 8 | 4413 | F3 vs. M3 | - | Regulation | Transcription | minor groove of adenine-thymine-rich DNA binding                        | GO:0003680 | F | 20   | 1.60E-05 | 9.03E-04 |
| 8 | 4414 | F3 vs. M3 | - | Regulation | Transcription | mRNA processing                                                         | GO:0006397 | P | 185  | 6.00E-13 | 9.79E-11 |
| 8 | 4415 | F3 vs. M3 | - | Regulation | Transcription | negative regulation of gene expression                                  | GO:0010629 | P | 308  | 4.01E-06 | 1.02E-04 |
| 8 | 4416 | F3 vs. M3 | - | Regulation | Transcription | negative regulation of gene expression, epigenetic                      | GO:0045814 | P | 34   | 1.49E-05 | 3.16E-04 |
| 8 | 4417 | F3 vs. M3 | - | Regulation | Transcription | negative regulation of nucleic acid-templated transcription             | GO:1903507 | P | 164  | 4.23E-03 | 3.60E-02 |
| 8 | 4418 | F3 vs. M3 | - | Regulation | Transcription | negative regulation of RNA biosynthetic process                         | GO:1902679 | P | 164  | 4.23E-03 | 3.60E-02 |
| 8 | 4419 | F3 vs. M3 | - | Regulation | Transcription | negative regulation of transcription, DNA-templated                     | GO:0045892 | P | 162  | 4.13E-03 | 3.53E-02 |
| 8 | 4420 | F3 vs. M3 | - | Regulation | Transcription | nuclear DNA-directed RNA polymerase complex                             | GO:0055029 | C | 69   | 5.43E-07 | 7.93E-06 |

|   |      |           |   |            |               |                                                                                          |            |   |      |          |          |
|---|------|-----------|---|------------|---------------|------------------------------------------------------------------------------------------|------------|---|------|----------|----------|
| 8 | 4421 | F3 vs. M3 | - | Regulation | Transcription | nuclear speck                                                                            | GO:0016607 | C | 41   | 4.96E-03 | 3.02E-02 |
| 8 | 4422 | F3 vs. M3 | - | Regulation | Transcription | nucleic acid-templated transcription                                                     | GO:0097659 | P | 148  | 9.23E-05 | 1.56E-03 |
| 8 | 4423 | F3 vs. M3 | - | Regulation | Transcription | nucleolus                                                                                | GO:0005730 | C | 354  | 1.31E-11 | 3.60E-10 |
| 8 | 4424 | F3 vs. M3 | - | Regulation | Transcription | nucleosome organization                                                                  | GO:0034728 | P | 43   | 8.21E-04 | 9.80E-03 |
| 8 | 4425 | F3 vs. M3 | - | Regulation | Transcription | peptidyl-lysine methylation                                                              | GO:0018022 | P | 40   | 1.62E-05 | 3.42E-04 |
| 8 | 4426 | F3 vs. M3 | - | Regulation | Transcription | positive regulation of chromosome organization                                           | GO:2001252 | P | 21   | 1.78E-03 | 1.84E-02 |
| 8 | 4427 | F3 vs. M3 | - | Regulation | Transcription | post-transcriptional gene silencing by RNA                                               | GO:0035194 | P | 48   | 8.79E-06 | 1.98E-04 |
| 8 | 4428 | F3 vs. M3 | - | Regulation | Transcription | pre-transcriptional gene silencing by RNA                                                | GO:0140458 | P | 18   | 1.73E-03 | 1.80E-02 |
| 8 | 4429 | F3 vs. M3 | - | Regulation | Transcription | production of siRNA involved in RNA interference                                         | GO:0030422 | P | 26   | 2.14E-04 | 3.20E-03 |
| 8 | 4430 | F3 vs. M3 | - | Regulation | Transcription | production of small RNA involved in gene silencing by RNA                                | GO:0070918 | P | 37   | 8.34E-07 | 2.50E-05 |
| 8 | 4431 | F3 vs. M3 | - | Regulation | Transcription | production of ta-siRNAs involved in RNA interference                                     | GO:0010267 | P | 12   | 4.12E-03 | 3.53E-02 |
| 8 | 4432 | F3 vs. M3 | - | Regulation | Transcription | protein acetylation                                                                      | GO:0006473 | P | 32   | 5.82E-03 | 4.65E-02 |
| 8 | 4433 | F3 vs. M3 | - | Regulation | Transcription | protein acylation                                                                        | GO:0043543 | P | 52   | 4.17E-04 | 5.58E-03 |
| 8 | 4434 | F3 vs. M3 | - | Regulation | Transcription | protein-DNA complex                                                                      | GO:0032993 | C | 40   | 1.58E-05 | 1.76E-04 |
| 8 | 4435 | F3 vs. M3 | - | Regulation | Transcription | protein-DNA complex assembly                                                             | GO:0065004 | P | 57   | 1.92E-06 | 5.36E-05 |
| 8 | 4436 | F3 vs. M3 | - | Regulation | Transcription | protein-DNA complex subunit organization                                                 | GO:0071824 | P | 69   | 7.42E-07 | 2.28E-05 |
| 8 | 4437 | F3 vs. M3 | - | Regulation | Transcription | regulation of gene expression                                                            | GO:0010468 | P | 1417 | 9.45E-11 | 7.09E-09 |
| 8 | 4438 | F3 vs. M3 | - | Regulation | Transcription | regulation of gene expression, epigenetic                                                | GO:0040029 | P | 62   | 2.14E-05 | 4.39E-04 |
| 8 | 4439 | F3 vs. M3 | - | Regulation | Transcription | regulation of gene silencing                                                             | GO:0060968 | P | 38   | 5.00E-03 | 4.17E-02 |
| 8 | 4440 | F3 vs. M3 | - | Regulation | Transcription | regulation of nucleic acid-templated transcription                                       | GO:1903506 | P | 1111 | 1.50E-07 | 5.65E-06 |
| 8 | 4441 | F3 vs. M3 | - | Regulation | Transcription | regulation of RNA biosynthetic process                                                   | GO:2001141 | P | 1113 | 2.33E-07 | 8.19E-06 |
| 8 | 4442 | F3 vs. M3 | - | Regulation | Transcription | regulation of transcription, DNA-templated                                               | GO:0006355 | P | 1111 | 1.50E-07 | 5.69E-06 |
| 8 | 4443 | F3 vs. M3 | - | Regulation | Transcription | RNA 3'-end processing                                                                    | GO:0031123 | P | 43   | 8.24E-06 | 1.88E-04 |
| 8 | 4444 | F3 vs. M3 | - | Regulation | Transcription | RNA biosynthetic process                                                                 | GO:0032774 | P | 151  | 5.02E-05 | 9.26E-04 |
| 8 | 4445 | F3 vs. M3 | - | Regulation | Transcription | RNA modification                                                                         | GO:0009451 | P | 156  | 2.58E-11 | 2.17E-09 |
| 8 | 4446 | F3 vs. M3 | - | Regulation | Transcription | RNA polymerase activity                                                                  | GO:0097747 | F | 33   | 6.42E-04 | 1.65E-02 |
| 8 | 4447 | F3 vs. M3 | - | Regulation | Transcription | RNA polymerase complex                                                                   | GO:0030880 | C | 81   | 1.40E-06 | 1.85E-05 |
| 8 | 4448 | F3 vs. M3 | - | Regulation | Transcription | RNA polymerase I complex                                                                 | GO:0005736 | C | 10   | 9.03E-03 | 4.79E-02 |
| 8 | 4449 | F3 vs. M3 | - | Regulation | Transcription | RNA polymerase II, core complex                                                          | GO:0005665 | C | 14   | 3.06E-03 | 1.97E-02 |
| 8 | 4450 | F3 vs. M3 | - | Regulation | Transcription | RNA polymerase II, holoenzyme                                                            | GO:0016591 | C | 46   | 2.23E-04 | 2.09E-03 |
| 8 | 4451 | F3 vs. M3 | - | Regulation | Transcription | RNA polymerase III complex                                                               | GO:0005666 | C | 16   | 1.35E-03 | 9.98E-03 |
| 8 | 4452 | F3 vs. M3 | - | Regulation | Transcription | RNA polymerase V complex                                                                 | GO:0000419 | C | 15   | 5.18E-03 | 3.11E-02 |
| 8 | 4453 | F3 vs. M3 | - | Regulation | Transcription | THO complex                                                                              | GO:0000347 | C | 11   | 7.10E-03 | 4.14E-02 |
| 8 | 4454 | F3 vs. M3 | - | Regulation | Transcription | transcription coregulator activity                                                       | GO:0003712 | F | 85   | 3.49E-04 | 1.05E-02 |
| 8 | 4455 | F3 vs. M3 | - | Regulation | Transcription | transcription, DNA-templated                                                             | GO:0006351 | P | 148  | 9.23E-05 | 1.56E-03 |
| 8 | 4456 | F3 vs. M3 | - | Regulation | Translation   | 90S preribosome                                                                          | GO:0030686 | C | 19   | 3.41E-03 | 2.14E-02 |
| 8 | 4457 | F3 vs. M3 | - | Regulation | Translation   | catalytic activity, acting on RNA                                                        | GO:0140098 | F | 259  | 9.60E-06 | 5.87E-04 |
| 8 | 4458 | F3 vs. M3 | - | Regulation | Translation   | catalytic step 2 spliceosome                                                             | GO:0071013 | C | 38   | 5.35E-05 | 5.52E-04 |
| 8 | 4459 | F3 vs. M3 | - | Regulation | Translation   | cytosolic large ribosomal subunit                                                        | GO:0022625 | C | 96   | 5.08E-03 | 3.08E-02 |
| 8 | 4460 | F3 vs. M3 | - | Regulation | Translation   | cytosolic small ribosomal subunit                                                        | GO:0022627 | C | 71   | 4.13E-03 | 2.56E-02 |
| 8 | 4461 | F3 vs. M3 | - | Regulation | Translation   | establishment of RNA localization                                                        | GO:0051236 | P | 47   | 2.82E-04 | 4.08E-03 |
| 8 | 4462 | F3 vs. M3 | - | Regulation | Translation   | large ribosomal subunit                                                                  | GO:0015934 | C | 119  | 8.65E-04 | 6.81E-03 |
| 8 | 4463 | F3 vs. M3 | - | Regulation | Translation   | maturation of 5.8S rRNA                                                                  | GO:0000460 | P | 21   | 2.84E-03 | 2.66E-02 |
| 8 | 4464 | F3 vs. M3 | - | Regulation | Translation   | maturation of SSU-rRNA                                                                   | GO:0030490 | P | 41   | 8.59E-05 | 1.47E-03 |
| 8 | 4465 | F3 vs. M3 | - | Regulation | Translation   | maturation of SSU-rRNA from tricistronic rRNA transcript (SSU-rRNA, 5.8S rRNA, LSU-rRNA) | GO:0000462 | P | 26   | 7.27E-04 | 8.93E-03 |
| 8 | 4466 | F3 vs. M3 | - | Regulation | Translation   | mRNA 3'-end processing                                                                   | GO:0031124 | P | 18   | 2.89E-03 | 2.69E-02 |
| 8 | 4467 | F3 vs. M3 | - | Regulation | Translation   | mRNA cis splicing, via spliceosome                                                       | GO:0045292 | P | 28   | 4.75E-03 | 3.99E-02 |
| 8 | 4468 | F3 vs. M3 | - | Regulation | Translation   | mRNA export from nucleus                                                                 | GO:0006406 | P | 23   | 3.63E-03 | 3.23E-02 |
| 8 | 4469 | F3 vs. M3 | - | Regulation | Translation   | mRNA metabolic process                                                                   | GO:0016071 | P | 270  | 2.75E-11 | 2.28E-09 |
| 8 | 4470 | F3 vs. M3 | - | Regulation | Translation   | mRNA splicing, via spliceosome                                                           | GO:0000398 | P | 133  | 2.69E-09 | 1.54E-07 |
| 8 | 4471 | F3 vs. M3 | - | Regulation | Translation   | mRNA transport                                                                           | GO:0051028 | P | 24   | 1.57E-03 | 1.67E-02 |
| 8 | 4472 | F3 vs. M3 | - | Regulation | Translation   | mRNA-containing ribonucleoprotein complex export from nucleus                            | GO:0071427 | P | 23   | 3.63E-03 | 3.24E-02 |
| 8 | 4473 | F3 vs. M3 | - | Regulation | Translation   | ncRNA 3'-end processing                                                                  | GO:0043628 | P | 21   | 8.38E-04 | 9.97E-03 |
| 8 | 4474 | F3 vs. M3 | - | Regulation | Translation   | ncRNA metabolic process                                                                  | GO:0034660 | P | 290  | 4.85E-10 | 3.13E-08 |
| 8 | 4475 | F3 vs. M3 | - | Regulation | Translation   | ncRNA processing                                                                         | GO:0034470 | P | 244  | 4.95E-11 | 4.04E-09 |
| 8 | 4476 | F3 vs. M3 | - | Regulation | Translation   | negative regulation of RNA metabolic process                                             | GO:0051253 | P | 172  | 1.93E-03 | 1.96E-02 |
| 8 | 4477 | F3 vs. M3 | - | Regulation | Translation   | organellar ribosome                                                                      | GO:0000313 | C | 40   | 1.56E-03 | 1.12E-02 |
| 8 | 4478 | F3 vs. M3 | - | Regulation | Translation   | pICln-Sm protein complex                                                                 | GO:0034715 | C | 5    | 8.06E-03 | 4.44E-02 |
| 8 | 4479 | F3 vs. M3 | - | Regulation | Translation   | posttranscriptional gene silencing                                                       | GO:0016441 | P | 55   | 2.74E-05 | 5.50E-04 |
| 8 | 4480 | F3 vs. M3 | - | Regulation | Translation   | posttranscriptional regulation of gene expression                                        | GO:0010608 | P | 150  | 1.55E-04 | 2.41E-03 |
| 8 | 4481 | F3 vs. M3 | - | Regulation | Translation   | precatalytic spliceosome                                                                 | GO:0071011 | C | 21   | 3.11E-04 | 2.80E-03 |
| 8 | 4482 | F3 vs. M3 | - | Regulation | Translation   | preribosome                                                                              | GO:0030684 | C | 65   | 7.32E-07 | 9.95E-06 |



|   |      |           |   |                        |               |                                                                |            |   |      |          |          |
|---|------|-----------|---|------------------------|---------------|----------------------------------------------------------------|------------|---|------|----------|----------|
| 8 | 4483 | F3 vs. M3 | - | Regulation             | Translation   | preribosome, large subunit precursor                           | GO:0030687 | C | 15   | 3.25E-03 | 2.07E-02 |
| 8 | 4484 | F3 vs. M3 | - | Regulation             | Translation   | prespliceosome                                                 | GO:0071010 | C | 14   | 2.48E-03 | 1.69E-02 |
| 8 | 4485 | F3 vs. M3 | - | Regulation             | Translation   | production of miRNAs involved in gene silencing by miRNA       | GO:0035196 | P | 14   | 1.30E-04 | 2.09E-03 |
| 8 | 4486 | F3 vs. M3 | - | Regulation             | Translation   | regulation of RNA metabolic process                            | GO:0051252 | P | 1185 | 1.31E-07 | 5.08E-06 |
| 8 | 4487 | F3 vs. M3 | - | Regulation             | Translation   | ribonucleoprotein complex                                      | GO:1990904 | C | 440  | 1.43E-13 | 4.29E-12 |
| 8 | 4488 | F3 vs. M3 | - | Regulation             | Translation   | ribonucleoprotein complex assembly                             | GO:0022618 | P | 116  | 1.81E-06 | 5.14E-05 |
| 8 | 4489 | F3 vs. M3 | - | Regulation             | Translation   | ribonucleoprotein complex biogenesis                           | GO:0022613 | P | 300  | 4.10E-12 | 4.22E-10 |
| 8 | 4490 | F3 vs. M3 | - | Regulation             | Translation   | ribonucleoprotein complex export from nucleus                  | GO:0071426 | P | 37   | 1.15E-03 | 1.31E-02 |
| 8 | 4491 | F3 vs. M3 | - | Regulation             | Translation   | ribonucleoprotein complex localization                         | GO:0071166 | P | 37   | 1.15E-03 | 1.31E-02 |
| 8 | 4492 | F3 vs. M3 | - | Regulation             | Translation   | ribonucleoprotein complex subunit organization                 | GO:0071826 | P | 119  | 1.27E-06 | 3.72E-05 |
| 8 | 4493 | F3 vs. M3 | - | Regulation             | Translation   | ribosomal large subunit biogenesis                             | GO:0042273 | P | 76   | 1.31E-03 | 1.44E-02 |
| 8 | 4494 | F3 vs. M3 | - | Regulation             | Translation   | ribosomal small subunit biogenesis                             | GO:0042274 | P | 66   | 1.52E-04 | 2.38E-03 |
| 8 | 4495 | F3 vs. M3 | - | Regulation             | Translation   | ribosomal subunit                                              | GO:0044391 | C | 214  | 1.61E-06 | 2.11E-05 |
| 8 | 4496 | F3 vs. M3 | - | Regulation             | Translation   | ribosome biogenesis                                            | GO:0042254 | P | 245  | 1.88E-08 | 8.69E-07 |
| 8 | 4497 | F3 vs. M3 | - | Regulation             | Translation   | RNA export from nucleus                                        | GO:0006405 | P | 43   | 7.09E-04 | 8.77E-03 |
| 8 | 4498 | F3 vs. M3 | - | Regulation             | Translation   | RNA interference                                               | GO:0016246 | P | 27   | 6.67E-04 | 8.34E-03 |
| 8 | 4499 | F3 vs. M3 | - | Regulation             | Translation   | RNA localization                                               | GO:0006403 | P | 53   | 4.97E-05 | 9.20E-04 |
| 8 | 4500 | F3 vs. M3 | - | Regulation             | Translation   | RNA phosphodiester bond hydrolysis                             | GO:0090501 | P | 32   | 1.63E-05 | 3.41E-04 |
| 8 | 4501 | F3 vs. M3 | - | Regulation             | Translation   | RNA processing                                                 | GO:0006396 | P | 497  | 0.00E+00 | 0.00E+00 |
| 8 | 4502 | F3 vs. M3 | - | Regulation             | Translation   | RNA splicing                                                   | GO:0008380 | P | 177  | 1.72E-08 | 8.03E-07 |
| 8 | 4503 | F3 vs. M3 | - | Regulation             | Translation   | RNA splicing, via transesterification reactions                | GO:0000375 | P | 145  | 2.78E-09 | 1.56E-07 |
|   |      |           |   |                        |               | RNA splicing, via transesterification reactions with bulged    |            |   |      |          |          |
| 8 | 4504 | F3 vs. M3 | - | Regulation             | Translation   | adenosine as nucleophile                                       | GO:0000377 | P | 145  | 2.78E-09 | 1.57E-07 |
| 8 | 4505 | F3 vs. M3 | - | Regulation             | Translation   | rRNA metabolic process                                         | GO:0016072 | P | 177  | 3.84E-06 | 9.82E-05 |
| 8 | 4506 | F3 vs. M3 | - | Regulation             | Translation   | rRNA modification                                              | GO:0000154 | P | 21   | 2.16E-03 | 2.17E-02 |
| 8 | 4507 | F3 vs. M3 | - | Regulation             | Translation   | rRNA processing                                                | GO:0006364 | P | 170  | 1.69E-06 | 4.80E-05 |
| 8 | 4508 | F3 vs. M3 | - | Regulation             | Translation   | small nuclear ribonucleoprotein complex                        | GO:0030532 | C | 46   | 2.81E-08 | 4.80E-07 |
| 8 | 4509 | F3 vs. M3 | - | Regulation             | Translation   | small nucleolar ribonucleoprotein complex                      | GO:0005732 | C | 20   | 2.32E-05 | 2.50E-04 |
| 8 | 4510 | F3 vs. M3 | - | Regulation             | Translation   | small ribosomal subunit                                        | GO:0015935 | C | 95   | 4.67E-04 | 4.07E-03 |
| 8 | 4511 | F3 vs. M3 | - | Regulation             | Translation   | small-subunit processome                                       | GO:0032040 | C | 39   | 2.67E-04 | 2.43E-03 |
| 8 | 4512 | F3 vs. M3 | - | Regulation             | Translation   | snoRNA binding                                                 | GO:0030515 | F | 20   | 2.17E-03 | 4.33E-02 |
| 8 | 4513 | F3 vs. M3 | - | Regulation             | Translation   | spliceosomal complex                                           | GO:0005681 | C | 93   | 3.86E-06 | 4.67E-05 |
| 8 | 4514 | F3 vs. M3 | - | Regulation             | Translation   | spliceosomal snRNP assembly                                    | GO:0000387 | P | 18   | 7.56E-04 | 9.18E-03 |
| 8 | 4515 | F3 vs. M3 | - | Regulation             | Translation   | spliceosomal snRNP complex                                     | GO:0097525 | C | 46   | 2.81E-08 | 4.88E-07 |
| 8 | 4516 | F3 vs. M3 | - | Regulation             | Translation   | spliceosomal tri-snRNP complex                                 | GO:0097526 | C | 27   | 8.50E-07 | 1.14E-05 |
| 8 | 4517 | F3 vs. M3 | - | Regulation             | Translation   | structural constituent of ribosome                             | GO:0003735 | F | 212  | 5.87E-05 | 2.44E-03 |
| 8 | 4518 | F3 vs. M3 | - | Regulation             | Translation   | translation                                                    | GO:0006412 | P | 339  | 4.36E-03 | 3.70E-02 |
| 8 | 4519 | F3 vs. M3 | - | Regulation             | Translation   | tRNA metabolic process                                         | GO:0006399 | P | 103  | 1.37E-04 | 2.16E-03 |
| 8 | 4520 | F3 vs. M3 | - | Regulation             | Translation   | tRNA modification                                              | GO:0006400 | P | 47   | 6.24E-04 | 7.89E-03 |
| 8 | 4521 | F3 vs. M3 | - | Regulation             | Translation   | tRNA processing                                                | GO:0008033 | P | 61   | 2.66E-06 | 7.04E-05 |
| 8 | 4522 | F3 vs. M3 | - | Regulation             | Translation   | U1 snRNP                                                       | GO:0005685 | C | 18   | 7.04E-05 | 7.20E-04 |
| 8 | 4523 | F3 vs. M3 | - | Regulation             | Translation   | U2 snRNP                                                       | GO:0005686 | C | 21   | 1.35E-05 | 1.54E-04 |
| 8 | 4524 | F3 vs. M3 | - | Regulation             | Translation   | U2-type spliceosome                                            | GO:0071004 | C | 14   | 2.48E-03 | 1.67E-02 |
| 8 | 4525 | F3 vs. M3 | - | Regulation             | Translation   | U2-type spliceosomal complex                                   | GO:0005684 | C | 39   | 8.86E-04 | 6.92E-03 |
| 8 | 4526 | F3 vs. M3 | - | Regulation             | Translation   | U4 snRNP                                                       | GO:0005687 | C | 10   | 1.69E-04 | 1.61E-03 |
| 8 | 4527 | F3 vs. M3 | - | Regulation             | Translation   | U4/U6 x U5 tri-snRNP complex                                   | GO:0046540 | C | 19   | 2.04E-05 | 2.22E-04 |
| 8 | 4528 | F3 vs. M3 | - | Regulation             | translation   | U5 snRNP                                                       | GO:0005682 | C | 14   | 9.94E-05 | 9.96E-04 |
| 8 | 4529 | F3 vs. M3 | - | Regulation             | Translation   | U6 snRNP                                                       | GO:0005688 | C | 7    | 8.95E-03 | 4.80E-02 |
| 8 | 4530 | F3 vs. M3 | - | Signaling and response | Signaling     | kinase regulator activity                                      | GO:0019207 | F | 58   | 3.12E-07 | 3.21E-05 |
| 8 | 4531 | F3 vs. M3 | - | Signaling and response | Signaling     | protein kinase complex                                         | GO:1902911 | C | 54   | 8.85E-09 | 1.72E-07 |
| 8 | 4532 | F3 vs. M3 | - | Signaling and response | Signaling     | protein kinase regulator activity                              | GO:0019887 | F | 57   | 1.29E-07 | 1.55E-05 |
|   |      |           |   |                        |               | regulation of cyclin-dependent protein serine/threonine kinase |            |   |      |          |          |
| 8 | 4533 | F3 vs. M3 | - | Signaling and response | Signaling     | activity                                                       | GO:0000079 | P | 36   | 2.45E-05 | 4.99E-04 |
| 8 | 4534 | F3 vs. M3 | - | Signaling and response | Signaling     | regulation of kinase activity                                  | GO:0043549 | P | 58   | 8.93E-06 | 2.01E-04 |
| 8 | 4535 | F3 vs. M3 | - | Signaling and response | Signaling     | regulation of phosphorylation                                  | GO:0042325 | P | 73   | 3.66E-04 | 5.00E-03 |
| 8 | 4536 | F3 vs. M3 | - | Signaling and response | Signaling     | regulation of protein kinase activity                          | GO:0045859 | P | 56   | 4.72E-06 | 1.17E-04 |
| 8 | 4537 | F3 vs. M3 | - | Signaling and response | Signaling     | regulation of protein phosphorylation                          | GO:0001932 | P | 65   | 7.71E-05 | 1.34E-03 |
| 8 | 4538 | F3 vs. M3 | - | Signaling and response | Signaling     | regulation of protein serine/threonine kinase activity         | GO:0071900 | P | 47   | 5.60E-04 | 7.23E-03 |
| 8 | 4539 | F3 vs. M3 | - | Signaling and response | Signaling     | serine/threonine protein kinase complex                        | GO:1902554 | C | 50   | 3.73E-09 | 7.88E-08 |
| 8 | 4540 | F3 vs. M3 | - | Signaling and response | Stress        | cellular response to DNA damage stimulus                       | GO:0006974 | P | 219  | 8.99E-15 | 1.92E-12 |
| 8 | 4541 | F3 vs. M3 | - | Signaling and response | Stress        | RNA-dependent DNA biosynthetic process                         | GO:0006278 | P | 6    | 8.54E-04 | 1.01E-02 |
| 9 | 4542 | L3 vs. S3 | + | Metabolism             | Bioenergetics | oxidoreductase activity, acting on CH-OH group of donors       | GO:0016614 | F | 142  | 2.21E-04 | 2.58E-02 |
|   |      |           |   |                        |               | oxidoreductase activity, acting on the CH-OH group of donors,  |            |   |      |          |          |
| 9 | 4543 | L3 vs. S3 | + | Metabolism             | Bioenergetics | NAD or NADP as acceptor                                        | GO:0016616 | F | 123  | 2.81E-04 | 2.93E-02 |

|   |      |           |   |             |                |                                                    |            |   |      |          |          |
|---|------|-----------|---|-------------|----------------|----------------------------------------------------|------------|---|------|----------|----------|
| 9 | 4544 | L3 vs. S3 | + | Metabolism  | Catabolism     | ubiquitin ligase complex                           | GO:0000151 | C | 205  | 1.98E-04 | 5.62E-03 |
| 9 | 4545 | L3 vs. S3 | + | Metabolism  | Metabolism     | catalytic activity                                 | GO:0003824 | F | 5316 | 4.13E-04 | 4.14E-02 |
| 9 | 4546 | L3 vs. S3 | + | Metabolism  | Metabolism     | glycoprotein metabolic process                     | GO:0009100 | P | 99   | 3.58E-04 | 3.88E-02 |
| 9 | 4547 | L3 vs. S3 | + | Metabolism  | Metabolism     | transferase activity                               | GO:0016740 | F | 2129 | 2.71E-04 | 2.92E-02 |
| 9 | 4548 | L3 vs. S3 | + | Metabolism  | Metabolism     | transferase activity, transferring glycosyl groups | GO:0016757 | F | 397  | 1.34E-04 | 1.63E-02 |
| 9 | 4549 | L3 vs. S3 | + | Metabolism  | Metabolism     | UDP-glycosyltransferase activity                   | GO:0008194 | F | 193  | 8.22E-05 | 1.20E-02 |
| 9 | 4550 | L3 vs. S3 | + | Metabolism  | Photosynthesis | chlorophyll binding                                | GO:0016168 | F | 21   | 6.38E-06 | 1.16E-03 |
| 9 | 4551 | L3 vs. S3 | + | Metabolism  | Photosynthesis | plastoglobule                                      | GO:0010287 | C | 54   | 7.95E-05 | 2.64E-03 |
| 9 | 4552 | L3 vs. S3 | - | Development | Cell division  | cell cycle                                         | GO:0007049 | P | 292  | 3.70E-04 | 3.93E-02 |
| 9 | 4553 | L3 vs. S3 | - | Development | Cell division  | cell cycle process                                 | GO:0022402 | P | 266  | 1.22E-04 | 1.43E-02 |
| 9 | 4554 | L3 vs. S3 | - | Development | Cell division  | microtubule motor activity                         | GO:0003777 | F | 38   | 1.02E-06 | 2.98E-04 |
| 9 | 4555 | L3 vs. S3 | - | Development | Cell division  | spindle                                            | GO:0005819 | C | 48   | 4.97E-04 | 1.24E-02 |
| 9 | 4556 | L3 vs. S3 | - | Development | Development    | cell junction                                      | GO:0030054 | C | 652  | 3.88E-10 | 2.97E-08 |
| 9 | 4557 | L3 vs. S3 | - | Development | Development    | cell periphery                                     | GO:0071944 | C | 2649 | 1.37E-03 | 2.79E-02 |
| 9 | 4558 | L3 vs. S3 | - | Development | Development    | cell wall                                          | GO:0005618 | C | 390  | 2.09E-05 | 8.32E-04 |
| 9 | 4559 | L3 vs. S3 | - | Development | Development    | cell-cell junction                                 | GO:0005911 | C | 652  | 3.88E-10 | 3.86E-08 |
| 9 | 4560 | L3 vs. S3 | - | Development | Development    | cellular component biogenesis                      | GO:0044085 | P | 878  | 1.87E-04 | 2.15E-02 |
| 9 | 4561 | L3 vs. S3 | - | Development | Development    | cellular component organization                    | GO:0016043 | P | 1571 | 5.35E-06 | 8.69E-04 |
| 9 | 4562 | L3 vs. S3 | - | Development | Development    | cellular component organization or biogenesis      | GO:0071840 | P | 1843 | 6.41E-07 | 1.86E-04 |
| 9 | 4563 | L3 vs. S3 | - | Development | Development    | cellular localization                              | GO:0051641 | P | 647  | 1.10E-04 | 1.35E-02 |
| 9 | 4564 | L3 vs. S3 | - | Development | Development    | cortical cytoskeleton                              | GO:0030863 | C | 27   | 6.03E-04 | 1.37E-02 |
| 9 | 4565 | L3 vs. S3 | - | Development | Development    | cortical microtubule                               | GO:0055028 | C | 22   | 6.18E-04 | 1.37E-02 |
| 9 | 4566 | L3 vs. S3 | - | Development | Development    | cortical microtubule cytoskeleton                  | GO:0030981 | C | 25   | 1.07E-03 | 2.31E-02 |
| 9 | 4567 | L3 vs. S3 | - | Development | Development    | cytoskeletal protein binding                       | GO:0008092 | F | 174  | 1.14E-06 | 3.01E-04 |
| 9 | 4568 | L3 vs. S3 | - | Development | Development    | cytoskeleton                                       | GO:0005856 | C | 192  | 1.06E-04 | 3.40E-03 |
| 9 | 4569 | L3 vs. S3 | - | Development | Development    | cytosol                                            | GO:0005829 | C | 2312 | 1.29E-07 | 7.55E-06 |
| 9 | 4570 | L3 vs. S3 | - | Development | Development    | external encapsulating structure                   | GO:0030312 | C | 392  | 1.02E-05 | 4.25E-04 |
| 9 | 4571 | L3 vs. S3 | - | Development | Development    | intracellular non-membrane-bounded organelle       | GO:0043232 | C | 1125 | 0.00E+00 | 0.00E+00 |
| 9 | 4572 | L3 vs. S3 | - | Development | Development    | intracellular organelle lumen                      | GO:0070013 | C | 862  | 1.40E-07 | 7.73E-06 |
| 9 | 4573 | L3 vs. S3 | - | Development | Development    | membrane-enclosed lumen                            | GO:0031974 | C | 862  | 1.40E-07 | 7.32E-06 |
| 9 | 4574 | L3 vs. S3 | - | Development | Development    | microtubule                                        | GO:0005874 | C | 89   | 6.74E-05 | 2.31E-03 |
| 9 | 4575 | L3 vs. S3 | - | Development | Development    | microtubule cytoskeleton                           | GO:0015630 | C | 137  | 4.89E-06 | 2.12E-04 |
| 9 | 4576 | L3 vs. S3 | - | Development | Development    | microtubule-based movement                         | GO:0007018 | P | 38   | 1.02E-06 | 2.26E-04 |
| 9 | 4577 | L3 vs. S3 | - | Development | Development    | microtubule-based process                          | GO:0007017 | P | 140  | 6.43E-08 | 2.73E-05 |
| 9 | 4578 | L3 vs. S3 | - | Development | Development    | movement of cell or subcellular component          | GO:0006928 | P | 55   | 5.17E-06 | 8.65E-04 |
| 9 | 4579 | L3 vs. S3 | - | Development | Development    | non-membrane-bounded organelle                     | GO:0043228 | C | 1125 | 0.00E+00 | 0.00E+00 |
| 9 | 4580 | L3 vs. S3 | - | Development | Development    | nuclear lumen                                      | GO:0031981 | C | 755  | 9.32E-07 | 4.22E-05 |
| 9 | 4581 | L3 vs. S3 | - | Development | Development    | nucleus                                            | GO:0005634 | C | 5886 | 3.44E-04 | 9.02E-03 |
| 9 | 4582 | L3 vs. S3 | - | Development | Development    | organelle assembly                                 | GO:0070925 | P | 131  | 4.29E-09 | 3.39E-06 |
| 9 | 4583 | L3 vs. S3 | - | Development | Development    | organelle lumen                                    | GO:0043233 | C | 862  | 1.40E-07 | 6.95E-06 |
| 9 | 4584 | L3 vs. S3 | - | Development | Development    | organelle membrane                                 | GO:0031090 | C | 1001 | 4.23E-04 | 1.08E-02 |
| 9 | 4585 | L3 vs. S3 | - | Development | Development    | organelle organization                             | GO:0006996 | P | 1093 | 1.59E-06 | 3.14E-04 |
| 9 | 4586 | L3 vs. S3 | - | Development | Development    | plant-type cell wall organization                  | GO:0009664 | P | 113  | 3.10E-04 | 3.43E-02 |
| 9 | 4587 | L3 vs. S3 | - | Development | Development    | polymeric cytoskeletal fiber                       | GO:0099513 | C | 97   | 5.30E-04 | 1.26E-02 |
| 9 | 4588 | L3 vs. S3 | - | Development | Development    | structural constituent of cell wall                | GO:0005199 | F | 23   | 1.85E-06 | 3.85E-04 |
| 9 | 4589 | L3 vs. S3 | - | Development | Development    | structural molecule activity                       | GO:0005198 | F | 327  | 0.00E+00 | 0.00E+00 |
| 9 | 4590 | L3 vs. S3 | - | Development | Development    | sympplast                                          | GO:0055044 | C | 652  | 3.88E-10 | 3.51E-08 |
| 9 | 4591 | L3 vs. S3 | - | Development | Development    | vacuole                                            | GO:0005773 | C | 747  | 4.99E-05 | 1.91E-03 |
| 9 | 4592 | L3 vs. S3 | - | Metabolism  | Bioenergetics  | inner mitochondrial membrane protein complex       | GO:0098800 | C | 116  | 2.59E-03 | 4.69E-02 |
| 9 | 4593 | L3 vs. S3 | - | Metabolism  | Bioenergetics  | mitochondrial protein complex                      | GO:0098798 | C | 171  | 2.54E-04 | 7.03E-03 |
| 9 | 4594 | L3 vs. S3 | - | Metabolism  | Bioenergetics  | mitochondrial respirasome                          | GO:0005746 | C | 79   | 2.80E-04 | 7.55E-03 |
| 9 | 4595 | L3 vs. S3 | - | Metabolism  | Bioenergetics  | mitochondrial respiratory chain complex III        | GO:0005750 | C | 17   | 2.42E-03 | 4.55E-02 |
| 9 | 4596 | L3 vs. S3 | - | Metabolism  | Bioenergetics  | oxidoreductase complex                             | GO:1990204 | C | 115  | 5.93E-05 | 2.11E-03 |
| 9 | 4597 | L3 vs. S3 | - | Metabolism  | Bioenergetics  | respirasome                                        | GO:0070469 | C | 82   | 1.08E-03 | 2.29E-02 |
| 9 | 4598 | L3 vs. S3 | - | Metabolism  | Bioenergetics  | respiratory chain complex                          | GO:0098803 | C | 77   | 1.21E-03 | 2.52E-02 |
| 9 | 4599 | L3 vs. S3 | - | Metabolism  | Bioenergetics  | respiratory chain complex III                      | GO:0045275 | C | 17   | 2.42E-03 | 4.47E-02 |
| 9 | 4600 | L3 vs. S3 | - | Metabolism  | Catabolism     | protein-containing complex                         | GO:0032991 | C | 1958 | 3.04E-07 | 1.44E-05 |
| 9 | 4601 | L3 vs. S3 | - | Metabolism  | Catabolism     | ubiquitin conjugating enzyme activity              | GO:0061631 | F | 28   | 9.92E-05 | 1.37E-02 |
| 9 | 4602 | L3 vs. S3 | - | Metabolism  | Catabolism     | ubiquitin-like protein conjugating enzyme activity | GO:0061650 | F | 29   | 7.80E-05 | 1.20E-02 |
| 9 | 4603 | L3 vs. S3 | - | Metabolism  | Metabolism     | amide biosynthetic process                         | GO:0043604 | P | 409  | 0.00E+00 | 0.00E+00 |
| 9 | 4604 | L3 vs. S3 | - | Metabolism  | Metabolism     | anchoring junction                                 | GO:0070161 | C | 652  | 3.88E-10 | 3.22E-08 |
| 9 | 4605 | L3 vs. S3 | - | Metabolism  | Metabolism     | binding                                            | GO:0005488 | F | 6149 | 6.96E-05 | 1.13E-02 |
| 9 | 4606 | L3 vs. S3 | - | Metabolism  | Metabolism     | cellular amide metabolic process                   | GO:0043603 | P | 498  | 6.44E-15 | 7.12E-12 |
| 9 | 4607 | L3 vs. S3 | - | Metabolism  | Metabolism     | cellular macromolecule biosynthetic process        | GO:0034645 | P | 848  | 1.79E-08 | 1.10E-05 |

|   |      |           |   |            |                      |                                                                |            |   |      |          |          |
|---|------|-----------|---|------------|----------------------|----------------------------------------------------------------|------------|---|------|----------|----------|
| 9 | 4608 | L3 vs. S3 | - | Metabolism | Metabolism           | cellular nitrogen compound biosynthetic process                | GO:0044271 | P | 830  | 5.88E-08 | 2.71E-05 |
| 9 | 4609 | L3 vs. S3 | - | Metabolism | Metabolism           | cellular nitrogen compound metabolic process                   | GO:0034641 | P | 1858 | 2.10E-04 | 2.37E-02 |
| 9 | 4610 | L3 vs. S3 | - | Metabolism | Metabolism           | cellular protein-containing complex assembly                   | GO:0034622 | P | 322  | 2.12E-05 | 2.86E-03 |
| 9 | 4611 | L3 vs. S3 | - | Metabolism | Metabolism           | heterocyclic compound binding                                  | GO:1901363 | F | 2939 | 1.23E-04 | 1.55E-02 |
| 9 | 4612 | L3 vs. S3 | - | Metabolism | Metabolism           | macromolecule biosynthetic process                             | GO:0009059 | P | 891  | 5.71E-08 | 2.87E-05 |
| 9 | 4613 | L3 vs. S3 | - | Metabolism | Metabolism           | microtubule binding                                            | GO:0008017 | F | 90   | 3.90E-10 | 2.84E-07 |
| 9 | 4614 | L3 vs. S3 | - | Metabolism | Metabolism           | motor activity                                                 | GO:0003774 | F | 52   | 1.79E-06 | 4.02E-04 |
| 9 | 4615 | L3 vs. S3 | - | Metabolism | Metabolism           | nucleic acid binding                                           | GO:0003676 | F | 2034 | 1.94E-07 | 6.28E-05 |
| 9 | 4616 | L3 vs. S3 | - | Metabolism | Metabolism           | organic cyclic compound binding                                | GO:0097159 | F | 2956 | 1.06E-04 | 1.40E-02 |
| 9 | 4617 | L3 vs. S3 | - | Metabolism | Metabolism           | organonitrogen compound biosynthetic process                   | GO:1901566 | P | 930  | 7.26E-06 | 1.11E-03 |
| 9 | 4618 | L3 vs. S3 | - | Metabolism | Metabolism           | peptide metabolic process                                      | GO:0006518 | P | 411  | 0.00E+00 | 0.00E+00 |
| 9 | 4619 | L3 vs. S3 | - | Metabolism | Metabolism           | protein binding                                                | GO:0005515 | F | 3492 | 2.55E-05 | 4.36E-03 |
| 9 | 4620 | L3 vs. S3 | - | Metabolism | Metabolism           | supramolecular fiber                                           | GO:0099512 | C | 97   | 5.30E-04 | 1.23E-02 |
| 9 | 4621 | L3 vs. S3 | - | Metabolism | Metabolism           | supramolecular polymer                                         | GO:0099081 | C | 97   | 5.30E-04 | 1.29E-02 |
| 9 | 4622 | L3 vs. S3 | - | Metabolism | Metabolism           | tubulin binding                                                | GO:0015631 | F | 94   | 1.16E-09 | 6.75E-07 |
| 9 | 4623 | L3 vs. S3 | - | Metabolism | Photosynthesis       | plastid ribosome                                               | GO:0009547 | C | 20   | 2.27E-03 | 4.35E-02 |
| 9 | 4624 | L3 vs. S3 | - | Metabolism | Transporters         | plasmodesma                                                    | GO:0009506 | C | 652  | 3.88E-10 | 4.29E-08 |
| 9 | 4625 | L3 vs. S3 | - | Metabolism | Transporters         | vesicle                                                        | GO:0031982 | C | 535  | 2.09E-03 | 4.08E-02 |
| 9 | 4626 | L3 vs. S3 | - | Regulation | Protein modification | protein dimerization activity                                  | GO:0046983 | F | 341  | 2.61E-06 | 5.07E-04 |
| 9 | 4627 | L3 vs. S3 | - | Regulation | Regulation           | biological regulation                                          | GO:0065007 | P | 3580 | 4.62E-04 | 4.73E-02 |
| 9 | 4628 | L3 vs. S3 | - | Regulation | Regulation           | molecular function regulator                                   | GO:0098772 | F | 1336 | 1.47E-10 | 1.42E-07 |
| 9 | 4629 | L3 vs. S3 | - | Regulation | Regulation           | regulation of biological process                               | GO:0050789 | P | 3217 | 5.95E-05 | 7.47E-03 |
| 9 | 4630 | L3 vs. S3 | - | Regulation | Regulation           | regulation of biosynthetic process                             | GO:0009889 | P | 1426 | 1.25E-05 | 1.77E-03 |
| 9 | 4631 | L3 vs. S3 | - | Regulation | Regulation           | regulation of cellular biosynthetic process                    | GO:0031326 | P | 1398 | 4.44E-06 | 7.66E-04 |
| 9 | 4632 | L3 vs. S3 | - | Regulation | Regulation           | regulation of cellular macromolecule biosynthetic process      | GO:2000112 | P | 1318 | 6.74E-06 | 1.06E-03 |
| 9 | 4633 | L3 vs. S3 | - | Regulation | Regulation           | regulation of cellular metabolic process                       | GO:0031323 | P | 1726 | 3.53E-06 | 6.50E-04 |
| 9 | 4634 | L3 vs. S3 | - | Regulation | Regulation           | regulation of cellular process                                 | GO:0050794 | P | 2791 | 9.57E-06 | 1.39E-03 |
| 9 | 4635 | L3 vs. S3 | - | Regulation | Regulation           | regulation of macromolecule biosynthetic process               | GO:0010556 | P | 1328 | 8.64E-06 | 1.29E-03 |
| 9 | 4636 | L3 vs. S3 | - | Regulation | Regulation           | regulation of macromolecule metabolic process                  | GO:0060255 | P | 1773 | 4.26E-06 | 7.59E-04 |
| 9 | 4637 | L3 vs. S3 | - | Regulation | Regulation           | regulation of metabolic process                                | GO:0019222 | P | 1954 | 3.16E-05 | 4.15E-03 |
| 9 | 4638 | L3 vs. S3 | - | Regulation | Regulation           | regulation of nitrogen compound metabolic process              | GO:0051171 | P | 1572 | 9.50E-07 | 2.39E-04 |
| 9 | 4639 | L3 vs. S3 | - | Regulation | Regulation           | regulation of nucleobase-containing compound metabolic process | GO:0019219 | P | 1315 | 1.20E-06 | 2.55E-04 |
| 9 | 4640 | L3 vs. S3 | - | Regulation | Regulation           | regulation of primary metabolic process                        | GO:0080090 | P | 1622 | 1.26E-06 | 2.57E-04 |
| 9 | 4641 | L3 vs. S3 | - | Regulation | Transcription        | DNA-binding transcription factor activity                      | GO:0003700 | F | 934  | 1.22E-07 | 4.44E-05 |
| 9 | 4642 | L3 vs. S3 | - | Regulation | Transcription        | gene expression                                                | GO:0010467 | P | 1063 | 7.97E-08 | 3.15E-05 |
| 9 | 4643 | L3 vs. S3 | - | Regulation | Transcription        | nucleolus                                                      | GO:0005730 | C | 348  | 1.15E-07 | 7.14E-06 |
| 9 | 4644 | L3 vs. S3 | - | Regulation | Transcription        | regulation of gene expression                                  | GO:0010468 | P | 1537 | 1.67E-05 | 2.31E-03 |
| 9 | 4645 | L3 vs. S3 | - | Regulation | Transcription        | regulation of nucleic acid-templated transcription             | GO:1903506 | P | 1209 | 9.56E-07 | 2.20E-04 |
| 9 | 4646 | L3 vs. S3 | - | Regulation | Transcription        | regulation of RNA biosynthetic process                         | GO:2001141 | P | 1210 | 7.91E-07 | 2.19E-04 |
| 9 | 4647 | L3 vs. S3 | - | Regulation | Transcription        | regulation of transcription, DNA-templated                     | GO:0006355 | P | 1209 | 9.56E-07 | 2.30E-04 |
| 9 | 4648 | L3 vs. S3 | - | Regulation | Transcription        | RNA binding                                                    | GO:0003723 | F | 1062 | 1.16E-06 | 2.82E-04 |
| 9 | 4649 | L3 vs. S3 | - | Regulation | Transcription        | transcription regulator activity                               | GO:0140110 | F | 1012 | 2.01E-08 | 8.38E-06 |
| 9 | 4650 | L3 vs. S3 | - | Regulation | Translation          | 90S preribosome                                                | GO:0030686 | C | 20   | 1.21E-04 | 3.76E-03 |
| 9 | 4651 | L3 vs. S3 | - | Regulation | Translation          | cytosolic large ribosomal subunit                              | GO:0022625 | C | 103  | 0.00E+00 | 0.00E+00 |
| 9 | 4652 | L3 vs. S3 | - | Regulation | Translation          | cytosolic ribosome                                             | GO:0022626 | C | 230  | 0.00E+00 | 0.00E+00 |
| 9 | 4653 | L3 vs. S3 | - | Regulation | Translation          | cytosolic small ribosomal subunit                              | GO:0022627 | C | 72   | 1.56E-09 | 1.11E-07 |
| 9 | 4654 | L3 vs. S3 | - | Regulation | Translation          | large ribosomal subunit                                        | GO:0015934 | C | 135  | 0.00E+00 | 0.00E+00 |
| 9 | 4655 | L3 vs. S3 | - | Regulation | Translation          | maturation of SSU-rRNA                                         | GO:0030490 | P | 36   | 1.10E-04 | 1.32E-02 |
| 9 | 4656 | L3 vs. S3 | - | Regulation | Translation          | mRNA binding                                                   | GO:0003729 | F | 714  | 1.58E-08 | 7.68E-06 |
| 9 | 4657 | L3 vs. S3 | - | Regulation | Translation          | organellar ribosome                                            | GO:0000313 | C | 47   | 1.91E-04 | 5.60E-03 |
| 9 | 4658 | L3 vs. S3 | - | Regulation | Translation          | peptide biosynthetic process                                   | GO:0043043 | P | 366  | 0.00E+00 | 0.00E+00 |
| 9 | 4659 | L3 vs. S3 | - | Regulation | Translation          | preribosome                                                    | GO:0030684 | C | 63   | 1.25E-04 | 3.78E-03 |
| 9 | 4660 | L3 vs. S3 | - | Regulation | Translation          | regulation of RNA metabolic process                            | GO:0051252 | P | 1285 | 2.34E-06 | 4.45E-04 |
| 9 | 4661 | L3 vs. S3 | - | Regulation | Translation          | ribonucleoprotein complex                                      | GO:1990904 | C | 467  | 0.00E+00 | 0.00E+00 |
| 9 | 4662 | L3 vs. S3 | - | Regulation | Translation          | ribonucleoprotein complex assembly                             | GO:0022618 | P | 124  | 2.00E-07 | 6.91E-05 |
| 9 | 4663 | L3 vs. S3 | - | Regulation | Translation          | ribonucleoprotein complex biogenesis                           | GO:0022613 | P | 325  | 8.05E-08 | 2.96E-05 |
| 9 | 4664 | L3 vs. S3 | - | Regulation | Translation          | ribonucleoprotein complex subunit organization                 | GO:0071826 | P | 127  | 2.78E-07 | 9.02E-05 |
| 9 | 4665 | L3 vs. S3 | - | Regulation | Translation          | ribosomal large subunit assembly                               | GO:0000027 | P | 35   | 4.24E-05 | 5.45E-03 |
| 9 | 4666 | L3 vs. S3 | - | Regulation | Translation          | ribosomal large subunit biogenesis                             | GO:0042273 | P | 86   | 8.27E-07 | 2.18E-04 |
| 9 | 4667 | L3 vs. S3 | - | Regulation | Translation          | ribosomal small subunit assembly                               | GO:0000028 | P | 27   | 4.56E-07 | 1.40E-04 |
| 9 | 4668 | L3 vs. S3 | - | Regulation | Translation          | ribosomal small subunit biogenesis                             | GO:0042274 | P | 66   | 5.75E-09 | 3.97E-06 |
| 9 | 4669 | L3 vs. S3 | - | Regulation | Translation          | ribosomal subunit                                              | GO:0044391 | C | 230  | 0.00E+00 | 0.00E+00 |
| 9 | 4670 | L3 vs. S3 | - | Regulation | Translation          | ribosome                                                       | GO:0005840 | C | 293  | 0.00E+00 | 0.00E+00 |

|    |      |           |   |                        |                      |                                                               |            |   |      |          |          |
|----|------|-----------|---|------------------------|----------------------|---------------------------------------------------------------|------------|---|------|----------|----------|
| 9  | 4671 | L3 vs. S3 | - | Regulation             | translation          | ribosome assembly                                             | GO:0042255 | P | 68   | 5.03E-10 | 4.64E-07 |
| 9  | 4672 | L3 vs. S3 | - | Regulation             | Translation          | ribosome biogenesis                                           | GO:0042254 | P | 268  | 2.13E-08 | 1.18E-05 |
| 9  | 4673 | L3 vs. S3 | - | Regulation             | Translation          | rRNA binding                                                  | GO:0019843 | F | 48   | 2.53E-04 | 2.83E-02 |
| 9  | 4674 | L3 vs. S3 | - | Regulation             | Translation          | small ribosomal subunit                                       | GO:0015935 | C | 95   | 1.07E-08 | 7.09E-07 |
| 9  | 4675 | L3 vs. S3 | - | Regulation             | Translation          | small-subunit processome                                      | GO:0032040 | C | 33   | 1.61E-03 | 3.20E-02 |
| 9  | 4676 | L3 vs. S3 | - | Regulation             | Translation          | structural constituent of ribosome                            | GO:0003735 | F | 233  | 0.00E+00 | 0.00E+00 |
| 9  | 4677 | L3 vs. S3 | - | Regulation             | Translation          | translation                                                   | GO:0006412 | P | 361  | 0.00E+00 | 0.00E+00 |
| 9  | 4678 | L3 vs. S3 | - | Signaling and response | Stress               | regulation of anion channel activity                          | GO:0010359 | P | 6    | 4.59E-04 | 4.78E-02 |
| 10 | 4679 | M3 vs. S3 | + | Development            | Development          | extracellular space                                           | GO:0005615 | C | 76   | 2.26E-03 | 3.82E-02 |
| 10 | 4680 | M3 vs. S3 | + | Development            | Development          | lytic vacuole                                                 | GO:0000323 | C | 38   | 2.70E-03 | 4.40E-02 |
| 10 | 4681 | M3 vs. S3 | + | Metabolism             | Bioenergetics        | oxidoreductase activity, acting on CH-OH group of donors      | GO:0016614 | F | 144  | 1.93E-05 | 2.96E-03 |
|    |      |           |   |                        |                      | oxidoreductase activity, acting on the CH-OH group of donors, |            |   |      |          |          |
|    |      |           |   |                        |                      | NAD or NADP as acceptor                                       | GO:0016616 | F | 123  | 8.13E-06 | 1.39E-03 |
| 10 | 4682 | M3 vs. S3 | + | Metabolism             | Bioenergetics        | peptidase activity                                            | GO:0008233 | F | 326  | 3.05E-04 | 2.78E-02 |
| 10 | 4683 | M3 vs. S3 | + | Metabolism             | Catabolism           | ubiquitin ligase complex                                      | GO:0000151 | C | 208  | 4.31E-04 | 9.76E-03 |
| 10 | 4684 | M3 vs. S3 | + | Metabolism             | Metabolism           | capsule organization                                          | GO:0045230 | P | 6    | 2.42E-04 | 2.25E-02 |
| 10 | 4685 | M3 vs. S3 | + | Metabolism             | Metabolism           | capsule polysaccharide biosynthetic process                   | GO:0045227 | P | 6    | 2.42E-04 | 2.22E-02 |
| 10 | 4686 | M3 vs. S3 | + | Metabolism             | Metabolism           | cellular protein modification process                         | GO:0003824 | F | 5364 | 2.94E-09 | 2.14E-06 |
| 10 | 4687 | M3 vs. S3 | + | Metabolism             | Metabolism           | extracellular polysaccharide biosynthetic process             | GO:0006464 | P | 1604 | 3.96E-04 | 3.08E-02 |
| 10 | 4688 | M3 vs. S3 | + | Metabolism             | Metabolism           | extracellular polysaccharide metabolic process                | GO:0045226 | P | 6    | 2.42E-04 | 2.18E-02 |
| 10 | 4689 | M3 vs. S3 | + | Metabolism             | Metabolism           | glucosyltransferase activity                                  | GO:0046379 | P | 6    | 2.42E-04 | 2.15E-02 |
| 10 | 4690 | M3 vs. S3 | + | Metabolism             | Metabolism           | methy-CpG binding                                             | GO:0046527 | F | 136  | 5.09E-05 | 6.45E-03 |
| 10 | 4691 | M3 vs. S3 | + | Metabolism             | Metabolism           | quercetin 3-O-glucosyltransferase activity                    | GO:0008327 | F | 12   | 4.71E-04 | 4.15E-02 |
| 10 | 4692 | M3 vs. S3 | + | Metabolism             | Metabolism           | quercetin 7-O-glucosyltransferase activity                    | GO:0080043 | F | 47   | 1.91E-07 | 6.19E-05 |
| 10 | 4693 | M3 vs. S3 | + | Metabolism             | Metabolism           | transferase activity                                          | GO:0080044 | F | 40   | 3.32E-06 | 6.45E-04 |
| 10 | 4694 | M3 vs. S3 | + | Metabolism             | Metabolism           | transferase activity, transferring glycosyl groups            | GO:0016740 | F | 2203 | 7.56E-06 | 1.38E-03 |
| 10 | 4695 | M3 vs. S3 | + | Metabolism             | Metabolism           | transferase activity, transferring hexosyl groups             | GO:0016757 | F | 407  | 5.21E-05 | 6.32E-03 |
| 10 | 4696 | M3 vs. S3 | + | Metabolism             | Metabolism           | UDP-arabinose 4-epimerase activity                            | GO:0016758 | F | 252  | 2.39E-04 | 2.32E-02 |
| 10 | 4697 | M3 vs. S3 | + | Metabolism             | Metabolism           | UDP-glucose 4-epimerase activity                              | GO:0050373 | F | 6    | 2.42E-04 | 2.27E-02 |
| 10 | 4698 | M3 vs. S3 | + | Metabolism             | Metabolism           | UDP-glucosyltransferase activity                              | GO:0003978 | F | 9    | 2.37E-04 | 2.38E-02 |
| 10 | 4699 | M3 vs. S3 | + | Metabolism             | Metabolism           | UDP-glycosyltransferase activity                              | GO:0035251 | F | 108  | 1.74E-05 | 2.82E-03 |
| 10 | 4700 | M3 vs. S3 | + | Metabolism             | Metabolism           | UDP-L-arabinose biosynthetic process                          | GO:0008194 | F | 207  | 9.21E-07 | 2.06E-04 |
| 10 | 4701 | M3 vs. S3 | + | Metabolism             | Metabolism           | UDP-L-arabinose metabolic process                             | GO:0033358 | P | 6    | 2.42E-04 | 2.29E-02 |
| 10 | 4702 | M3 vs. S3 | + | Metabolism             | Transporters         | amino acid transmembrane transport                            | GO:0033356 | P | 11   | 2.61E-05 | 3.95E-03 |
| 10 | 4703 | M3 vs. S3 | + | Metabolism             | Transporters         | amino acid transmembrane transporter activity                 | GO:0003333 | P | 17   | 5.47E-04 | 4.14E-02 |
| 10 | 4704 | M3 vs. S3 | + | Metabolism             | Transporters         | amino acid transport                                          | GO:0015171 | F | 54   | 1.15E-04 | 1.28E-02 |
| 10 | 4705 | M3 vs. S3 | + | Regulation             | Protein modification | protein modification process                                  | GO:0006865 | P | 35   | 9.66E-07 | 2.35E-04 |
| 10 | 4706 | M3 vs. S3 | + | Regulation             | Transcription        | macromolecule modification                                    | GO:0036211 | P | 1604 | 3.96E-04 | 3.12E-02 |
| 10 | 4707 | M3 vs. S3 | + | Development            | Cell division        | syncytium formation                                           | GO:0043412 | P | 1810 | 7.80E-05 | 8.73E-03 |
| 10 | 4708 | M3 vs. S3 | - | Development            | Development          | cell junction                                                 | GO:0006949 | P | 15   | 6.32E-04 | 4.66E-02 |
| 10 | 4709 | M3 vs. S3 | - | Development            | Development          | cell-cell junction                                            | GO:0030054 | C | 671  | 5.49E-06 | 1.89E-04 |
| 10 | 4710 | M3 vs. S3 | - | Development            | Development          | cellular component assembly                                   | GO:0005911 | C | 671  | 5.49E-06 | 2.10E-04 |
| 10 | 4711 | M3 vs. S3 | - | Development            | Development          | cellular component biogenesis                                 | GO:0022607 | P | 547  | 2.65E-05 | 3.90E-03 |
| 10 | 4712 | M3 vs. S3 | - | Development            | Development          | cellular component organization                               | GO:0044085 | P | 875  | 3.63E-05 | 4.96E-03 |
| 10 | 4713 | M3 vs. S3 | - | Development            | Development          | cellular component organization or biogenesis                 | GO:0016043 | P | 1568 | 1.57E-06 | 3.52E-04 |
| 10 | 4714 | M3 vs. S3 | - | Development            | Development          | cortical cytoskeleton                                         | GO:0071840 | P | 1842 | 8.29E-07 | 2.11E-04 |
| 10 | 4715 | M3 vs. S3 | - | Development            | Development          | cortical microtubule                                          | GO:0030863 | C | 29   | 5.50E-04 | 1.19E-02 |
| 10 | 4716 | M3 vs. S3 | - | Development            | Development          | cortical microtubule cytoskeleton                             | GO:0055028 | C | 26   | 1.79E-03 | 3.23E-02 |
| 10 | 4717 | M3 vs. S3 | - | Development            | Development          | cytoplasmic microtubule                                       | GO:0030981 | C | 27   | 7.65E-04 | 1.52E-02 |
| 10 | 4718 | M3 vs. S3 | - | Development            | Development          | cytoskeletal protein binding                                  | GO:0005881 | C | 30   | 1.67E-03 | 3.09E-02 |
| 10 | 4719 | M3 vs. S3 | - | Development            | Development          | cytoskeleton                                                  | GO:0008092 | F | 180  | 5.57E-05 | 6.49E-03 |
| 10 | 4720 | M3 vs. S3 | - | Development            | Development          | cytoskeleton organization                                     | GO:0005856 | C | 193  | 5.08E-06 | 2.11E-04 |
| 10 | 4721 | M3 vs. S3 | - | Development            | Development          | cytosol                                                       | GO:0007010 | P | 185  | 1.49E-04 | 1.52E-02 |
| 10 | 4722 | M3 vs. S3 | - | Development            | Development          | envelope                                                      | GO:0005829 | C | 2340 | 1.24E-09 | 1.03E-07 |
| 10 | 4723 | M3 vs. S3 | - | Development            | Development          | floral organ development                                      | GO:0031975 | C | 754  | 3.37E-04 | 8.38E-03 |
| 10 | 4724 | M3 vs. S3 | - | Development            | Development          | floral whorl development                                      | GO:0048437 | P | 179  | 3.89E-04 | 3.11E-02 |
| 10 | 4725 | M3 vs. S3 | - | Development            | Development          | gynoecium development                                         | GO:0048438 | P | 143  | 7.78E-05 | 8.88E-03 |
| 10 | 4726 | M3 vs. S3 | - | Development            | Development          | inflorescence development                                     | GO:0048467 | P | 67   | 7.01E-04 | 4.96E-02 |
| 10 | 4727 | M3 vs. S3 | - | Development            | Development          | intracellular non-membrane-bounded organelle                  | GO:0010229 | P | 24   | 4.31E-06 | 8.94E-04 |
| 10 | 4728 | M3 vs. S3 | - | Development            | Development          | intracellular organelle lumen                                 | GO:0043232 | C | 1137 | 0.00E+00 | 0.00E+00 |
| 10 | 4729 | M3 vs. S3 | - | Development            | Development          | leaf morphogenesis                                            | GO:0070013 | C | 870  | 1.36E-07 | 8.48E-06 |
| 10 | 4730 | M3 vs. S3 | - | Development            | Development          | membrane protein complex                                      | GO:0009965 | P | 73   | 1.55E-05 | 2.55E-03 |
| 10 | 4731 | M3 vs. S3 | - | Development            | Development          | membrane-enclosed lumen                                       | GO:0098796 | C | 410  | 2.18E-03 | 3.74E-02 |
| 10 | 4732 | M3 vs. S3 | - | Development            | Development          |                                                               | GO:0031974 | C | 870  | 1.36E-07 | 7.99E-06 |



|    |      |           |   |             |                      |                                                             |            |   |      |          |          |
|----|------|-----------|---|-------------|----------------------|-------------------------------------------------------------|------------|---|------|----------|----------|
| 10 | 4734 | M3 vs. S3 | - | Development | Development          | microbody membrane                                          | GO:0031903 | C | 19   | 2.11E-03 | 3.69E-02 |
| 10 | 4735 | M3 vs. S3 | - | Development | Development          | microtubule                                                 | GO:0005874 | C | 88   | 4.75E-06 | 2.06E-04 |
| 10 | 4736 | M3 vs. S3 | - | Development | Development          | microtubule cytoskeleton                                    | GO:0015630 | C | 135  | 3.30E-06 | 1.49E-04 |
| 10 | 4737 | M3 vs. S3 | - | Development | Development          | microtubule cytoskeleton organization                       | GO:0000226 | P | 103  | 5.01E-05 | 6.22E-03 |
| 10 | 4738 | M3 vs. S3 | - | Development | Development          | microtubule-based process                                   | GO:0007017 | P | 139  | 1.20E-06 | 2.79E-04 |
| 10 | 4739 | M3 vs. S3 | - | Development | Development          | non-membrane-bounded organelle                              | GO:0043228 | C | 1137 | 0.00E+00 | 0.00E+00 |
| 10 | 4740 | M3 vs. S3 | - | Development | Development          | nuclear lumen                                               | GO:0031981 | C | 756  | 6.50E-07 | 3.24E-05 |
| 10 | 4741 | M3 vs. S3 | - | Development | Development          | nucleus                                                     | GO:0005634 | C | 5861 | 6.31E-06 | 2.10E-04 |
| 10 | 4742 | M3 vs. S3 | - | Development | Development          | organelle assembly                                          | GO:0070925 | P | 132  | 1.67E-08 | 6.67E-06 |
| 10 | 4743 | M3 vs. S3 | - | Development | Development          | organelle envelope                                          | GO:0031967 | C | 754  | 3.37E-04 | 8.17E-03 |
| 10 | 4744 | M3 vs. S3 | - | Development | Development          | organelle lumen                                             | GO:0043233 | C | 870  | 1.36E-07 | 7.54E-06 |
| 10 | 4745 | M3 vs. S3 | - | Development | Development          | organelle organization                                      | GO:0006996 | P | 1092 | 1.75E-07 | 5.16E-05 |
| 10 | 4746 | M3 vs. S3 | - | Development | Development          | plant-type cell wall organization                           | GO:0009664 | P | 119  | 3.54E-04 | 2.92E-02 |
| 10 | 4747 | M3 vs. S3 | - | Development | Development          | polymeric cytoskeletal fiber                                | GO:0099513 | C | 97   | 1.61E-04 | 4.44E-03 |
| 10 | 4748 | M3 vs. S3 | - | Development | Development          | regionalization                                             | GO:0003002 | P | 123  | 4.31E-04 | 3.31E-02 |
| 10 | 4749 | M3 vs. S3 | - | Development | Development          | reproductive shoot system development                       | GO:0090567 | P | 276  | 2.42E-04 | 2.12E-02 |
| 10 | 4750 | M3 vs. S3 | - | Development | Development          | shoot system morphogenesis                                  | GO:0010016 | P | 122  | 3.13E-05 | 4.38E-03 |
| 10 | 4751 | M3 vs. S3 | - | Development | Development          | specification of symmetry                                   | GO:0009799 | P | 7    | 3.40E-04 | 2.84E-02 |
| 10 | 4752 | M3 vs. S3 | - | Development | Development          | structural constituent of cell wall                         | GO:0005199 | F | 21   | 2.74E-05 | 3.62E-03 |
| 10 | 4753 | M3 vs. S3 | - | Development | Development          | structural molecule activity                                | GO:0005198 | F | 326  | 0.00E+00 | 0.00E+00 |
| 10 | 4754 | M3 vs. S3 | - | Development | Development          | symplast                                                    | GO:0055044 | C | 671  | 5.49E-06 | 2.03E-04 |
| 10 | 4755 | M3 vs. S3 | - | Metabolism  | Bioenergetics        | ATP synthesis coupled electron transport                    | GO:0042773 | P | 36   | 6.95E-04 | 4.98E-02 |
| 10 | 4756 | M3 vs. S3 | - | Metabolism  | Bioenergetics        | inner mitochondrial membrane protein complex                | GO:0098800 | C | 128  | 3.10E-04 | 7.92E-03 |
| 10 | 4757 | M3 vs. S3 | - | Metabolism  | Bioenergetics        | mitochondrial ATP synthesis coupled electron transport      | GO:0042775 | P | 31   | 3.59E-04 | 2.91E-02 |
| 10 | 4758 | M3 vs. S3 | - | Metabolism  | Bioenergetics        | mitochondrial electron transport, ubiquinol to cytochrome c | GO:0006122 | P | 13   | 2.19E-04 | 2.15E-02 |
| 10 | 4759 | M3 vs. S3 | - | Metabolism  | Bioenergetics        | mitochondrial envelope                                      | GO:0005740 | C | 230  | 6.34E-04 | 1.32E-02 |
| 10 | 4760 | M3 vs. S3 | - | Metabolism  | Bioenergetics        | mitochondrial protein complex                               | GO:0098798 | C | 186  | 1.96E-05 | 6.30E-04 |
| 10 | 4761 | M3 vs. S3 | - | Metabolism  | Bioenergetics        | mitochondrial respirasome                                   | GO:0005746 | C | 84   | 3.39E-08 | 2.25E-06 |
| 10 | 4762 | M3 vs. S3 | - | Metabolism  | Bioenergetics        | mitochondrial respiratory chain complex I                   | GO:0005747 | C | 51   | 1.63E-04 | 4.27E-03 |
| 10 | 4763 | M3 vs. S3 | - | Metabolism  | Bioenergetics        | mitochondrial respiratory chain complex III                 | GO:0005750 | C | 18   | 1.40E-04 | 4.23E-03 |
| 10 | 4764 | M3 vs. S3 | - | Metabolism  | Bioenergetics        | NADH dehydrogenase complex                                  | GO:0030964 | C | 54   | 4.71E-04 | 1.04E-02 |
| 10 | 4765 | M3 vs. S3 | - | Metabolism  | Bioenergetics        | oxidoreductase complex                                      | GO:1990204 | C | 117  | 7.43E-09 | 5.69E-07 |
| 10 | 4766 | M3 vs. S3 | - | Metabolism  | Bioenergetics        | respirasome                                                 | GO:0070469 | C | 87   | 3.59E-07 | 1.88E-05 |
| 10 | 4767 | M3 vs. S3 | - | Metabolism  | Bioenergetics        | respiratory chain complex                                   | GO:0098803 | C | 84   | 1.08E-06 | 5.11E-05 |
| 10 | 4768 | M3 vs. S3 | - | Metabolism  | Bioenergetics        | respiratory chain complex I                                 | GO:0045271 | C | 53   | 9.80E-04 | 1.88E-02 |
| 10 | 4769 | M3 vs. S3 | - | Metabolism  | Bioenergetics        | respiratory chain complex III                               | GO:0045275 | C | 18   | 1.40E-04 | 4.11E-03 |
| 10 | 4770 | M3 vs. S3 | - | Metabolism  | Bioenergetics        | respiratory electron transport chain                        | GO:0022904 | P | 43   | 2.31E-04 | 2.22E-02 |
| 10 | 4771 | M3 vs. S3 | - | Metabolism  | Catabolism           | peroxisomal membrane                                        | GO:0005778 | C | 19   | 2.11E-03 | 3.76E-02 |
| 10 | 4772 | M3 vs. S3 | - | Metabolism  | Catabolism           | protein-containing complex                                  | GO:0032991 | C | 1943 | 1.13E-08 | 8.04E-07 |
| 10 | 4773 | M3 vs. S3 | - | Metabolism  | Catabolism           | ubiquitin conjugating enzyme activity                       | GO:0061631 | F | 32   | 4.15E-07 | 1.10E-04 |
| 10 | 4774 | M3 vs. S3 | - | Metabolism  | Catabolism           | ubiquitin-like protein conjugating enzyme activity          | GO:0061650 | F | 33   | 3.41E-07 | 9.92E-05 |
| 10 | 4775 | M3 vs. S3 | - | Metabolism  | Metabolism           | amide biosynthetic process                                  | GO:0043604 | P | 411  | 0.00E+00 | 0.00E+00 |
| 10 | 4776 | M3 vs. S3 | - | Metabolism  | Metabolism           | anchoring junction                                          | GO:0070161 | C | 671  | 5.49E-06 | 1.95E-04 |
| 10 | 4777 | M3 vs. S3 | - | Metabolism  | Metabolism           | cellular amide metabolic process                            | GO:0043603 | P | 497  | 1.32E-14 | 1.48E-11 |
| 10 | 4778 | M3 vs. S3 | - | Metabolism  | Metabolism           | cellular macromolecule biosynthetic process                 | GO:0034645 | P | 860  | 8.87E-10 | 6.20E-07 |
| 10 | 4779 | M3 vs. S3 | - | Metabolism  | Metabolism           | cellular nitrogen compound biosynthetic process             | GO:0044271 | P | 838  | 5.03E-09 | 2.56E-06 |
| 10 | 4780 | M3 vs. S3 | - | Metabolism  | Metabolism           | cellular protein-containing complex assembly                | GO:0034622 | P | 317  | 8.65E-08 | 3.02E-05 |
| 10 | 4781 | M3 vs. S3 | - | Metabolism  | Metabolism           | macromolecule biosynthetic process                          | GO:0009059 | P | 903  | 2.48E-09 | 1.54E-06 |
| 10 | 4782 | M3 vs. S3 | - | Metabolism  | Metabolism           | microtubule binding                                         | GO:0008017 | F | 95   | 1.61E-04 | 1.74E-02 |
| 10 | 4783 | M3 vs. S3 | - | Metabolism  | Metabolism           | motor activity                                              | GO:0003774 | F | 51   | 2.04E-04 | 2.12E-02 |
| 10 | 4784 | M3 vs. S3 | - | Metabolism  | Metabolism           | nucleic acid binding                                        | GO:0003676 | F | 2066 | 1.55E-08 | 9.03E-06 |
| 10 | 4785 | M3 vs. S3 | - | Metabolism  | Metabolism           | organonitrogen compound biosynthetic process                | GO:1901566 | P | 940  | 7.35E-07 | 1.96E-04 |
| 10 | 4786 | M3 vs. S3 | - | Metabolism  | Metabolism           | peptide metabolic process                                   | GO:0006518 | P | 405  | 0.00E+00 | 0.00E+00 |
| 10 | 4787 | M3 vs. S3 | - | Metabolism  | Metabolism           | phosphatidylinositol metabolic process                      | GO:0046488 | P | 61   | 6.75E-04 | 4.91E-02 |
| 10 | 4788 | M3 vs. S3 | - | Metabolism  | Metabolism           | protein binding                                             | GO:0005515 | F | 3536 | 2.15E-05 | 3.14E-03 |
| 10 | 4789 | M3 vs. S3 | - | Metabolism  | Metabolism           | Sm-like protein family complex                              | GO:0120114 | C | 52   | 2.44E-03 | 4.05E-02 |
| 10 | 4790 | M3 vs. S3 | - | Metabolism  | Metabolism           | supramolecular complex                                      | GO:0099080 | C | 163  | 7.45E-04 | 1.51E-02 |
| 10 | 4791 | M3 vs. S3 | - | Metabolism  | Metabolism           | supramolecular fiber                                        | GO:0099512 | C | 97   | 1.61E-04 | 4.32E-03 |
| 10 | 4792 | M3 vs. S3 | - | Metabolism  | Metabolism           | supramolecular polymer                                      | GO:0099081 | C | 97   | 1.61E-04 | 4.57E-03 |
| 10 | 4793 | M3 vs. S3 | - | Metabolism  | Metabolism           | tubulin binding                                             | GO:0015631 | F | 102  | 2.46E-05 | 3.41E-03 |
| 10 | 4794 | M3 vs. S3 | - | Metabolism  | Transporters         | plasmodesma                                                 | GO:0009506 | C | 671  | 5.49E-06 | 2.19E-04 |
| 10 | 4795 | M3 vs. S3 | - | Metabolism  | Transporters         | vesicle                                                     | GO:0031982 | C | 533  | 9.26E-04 | 1.81E-02 |
| 10 | 4796 | M3 vs. S3 | - | Metabolism  | Transporters         | vesicle-mediated transport                                  | GO:0016192 | P | 316  | 1.15E-04 | 1.23E-02 |
| 10 | 4797 | M3 vs. S3 | - | Regulation  | Protein modification | protein-containing complex assembly                         | GO:0065003 | P | 357  | 1.74E-05 | 2.78E-03 |

|    |      |           |   |             |                      |                                                                |            |   |      |          |          |
|----|------|-----------|---|-------------|----------------------|----------------------------------------------------------------|------------|---|------|----------|----------|
| 10 | 4798 | M3 vs. S3 | - | Regulation  | Protein modification | protein-containing complex subunit organization                | GO:0043933 | P | 409  | 1.23E-04 | 1.30E-02 |
| 10 | 4799 | M3 vs. S3 | - | Regulation  | Regulation           | biological regulation                                          | GO:0065007 | P | 3590 | 5.89E-04 | 4.39E-02 |
| 10 | 4800 | M3 vs. S3 | - | Regulation  | Regulation           | molecular function regulator                                   | GO:0098772 | F | 1343 | 8.94E-08 | 3.72E-05 |
| 10 | 4801 | M3 vs. S3 | - | Regulation  | Regulation           | regulation of biological process                               | GO:0050789 | P | 3230 | 7.31E-05 | 8.52E-03 |
| 10 | 4802 | M3 vs. S3 | - | Regulation  | Regulation           | regulation of biosynthetic process                             | GO:0009889 | P | 1436 | 1.44E-04 | 1.50E-02 |
| 10 | 4803 | M3 vs. S3 | - | Regulation  | Regulation           | regulation of cellular biosynthetic process                    | GO:0031326 | P | 1408 | 4.74E-05 | 6.17E-03 |
| 10 | 4804 | M3 vs. S3 | - | Regulation  | Regulation           | regulation of cellular macromolecule biosynthetic process      | GO:2000112 | P | 1329 | 5.98E-05 | 7.12E-03 |
| 10 | 4805 | M3 vs. S3 | - | Regulation  | Regulation           | regulation of cellular metabolic process                       | GO:0031323 | P | 1750 | 5.05E-05 | 6.14E-03 |
| 10 | 4806 | M3 vs. S3 | - | Regulation  | Regulation           | regulation of cellular process                                 | GO:0050794 | P | 2800 | 8.49E-06 | 1.48E-03 |
| 10 | 4807 | M3 vs. S3 | - | Regulation  | Regulation           | regulation of macromolecule biosynthetic process               | GO:0010556 | P | 1338 | 8.23E-05 | 9.03E-03 |
| 10 | 4808 | M3 vs. S3 | - | Regulation  | Regulation           | regulation of macromolecule metabolic process                  | GO:0060255 | P | 1781 | 3.89E-05 | 5.18E-03 |
| 10 | 4809 | M3 vs. S3 | - | Regulation  | Regulation           | regulation of metabolic process                                | GO:0019222 | P | 1975 | 2.45E-04 | 2.11E-02 |
| 10 | 4810 | M3 vs. S3 | - | Regulation  | Regulation           | regulation of nitrogen compound metabolic process              | GO:0051171 | P | 1586 | 2.53E-06 | 5.45E-04 |
|    |      |           |   |             |                      |                                                                |            |   |      |          |          |
| 10 | 4811 | M3 vs. S3 | - | Regulation  | Regulation           | regulation of nucleobase-containing compound metabolic process | GO:0019219 | P | 1332 | 7.69E-06 | 1.39E-03 |
| 10 | 4812 | M3 vs. S3 | - | Regulation  | Regulation           | regulation of primary metabolic process                        | GO:0080090 | P | 1640 | 1.75E-05 | 2.72E-03 |
| 10 | 4813 | M3 vs. S3 | - | Regulation  | Transcription        | DNA-binding transcription factor activity                      | GO:0003700 | F | 933  | 1.43E-06 | 2.98E-04 |
| 10 | 4814 | M3 vs. S3 | - | Regulation  | Transcription        | gene expression                                                | GO:0010467 | P | 1063 | 4.89E-10 | 3.91E-07 |
| 10 | 4815 | M3 vs. S3 | - | Regulation  | Transcription        | nucleolus                                                      | GO:0005730 | C | 336  | 9.80E-10 | 8.88E-08 |
| 10 | 4816 | M3 vs. S3 | - | Regulation  | Transcription        | regulation of gene expression                                  | GO:0010468 | P | 1551 | 2.96E-05 | 4.24E-03 |
| 10 | 4817 | M3 vs. S3 | - | Regulation  | Transcription        | regulation of nucleic acid-templated transcription             | GO:1903506 | P | 1211 | 4.76E-06 | 9.18E-04 |
| 10 | 4818 | M3 vs. S3 | - | Regulation  | Transcription        | regulation of RNA biosynthetic process                         | GO:2001141 | P | 1213 | 4.94E-06 | 9.22E-04 |
| 10 | 4819 | M3 vs. S3 | - | Regulation  | Transcription        | regulation of transcription, DNA-templated                     | GO:0006355 | P | 1211 | 4.76E-06 | 9.51E-04 |
| 10 | 4820 | M3 vs. S3 | - | Regulation  | Transcription        | RNA binding                                                    | GO:0003723 | F | 1094 | 1.93E-08 | 9.37E-06 |
| 10 | 4821 | M3 vs. S3 | - | Regulation  | Transcription        | transcription regulator activity                               | GO:0140110 | F | 1016 | 9.50E-08 | 3.46E-05 |
| 10 | 4822 | M3 vs. S3 | - | Regulation  | Translation          | cytoplasmic translation                                        | GO:0002181 | P | 55   | 1.69E-04 | 1.69E-02 |
| 10 | 4823 | M3 vs. S3 | - | Regulation  | Translation          | cytosolic large ribosomal subunit                              | GO:0022625 | C | 103  | 0.00E+00 | 0.00E+00 |
| 10 | 4824 | M3 vs. S3 | - | Regulation  | Translation          | cytosolic ribosome                                             | GO:0022626 | C | 233  | 0.00E+00 | 0.00E+00 |
| 10 | 4825 | M3 vs. S3 | - | Regulation  | Translation          | cytosolic small ribosomal subunit                              | GO:0022627 | C | 76   | 5.91E-12 | 6.54E-10 |
| 10 | 4826 | M3 vs. S3 | - | Regulation  | Translation          | large ribosomal subunit                                        | GO:0015934 | C | 134  | 0.00E+00 | 0.00E+00 |
| 10 | 4827 | M3 vs. S3 | - | Regulation  | Translation          | maturation of SSU-rRNA                                         | GO:0030490 | P | 40   | 3.39E-04 | 2.87E-02 |
| 10 | 4828 | M3 vs. S3 | - | Regulation  | Translation          | mRNA binding                                                   | GO:0003729 | F | 732  | 3.07E-12 | 2.98E-09 |
| 10 | 4829 | M3 vs. S3 | - | Regulation  | Translation          | peptide biosynthetic process                                   | GO:0043043 | P | 363  | 0.00E+00 | 0.00E+00 |
| 10 | 4830 | M3 vs. S3 | - | Regulation  | Translation          | precatalytic spliceosome                                       | GO:0071011 | C | 21   | 1.00E-03 | 1.89E-02 |
| 10 | 4831 | M3 vs. S3 | - | Regulation  | Translation          | regulation of RNA metabolic process                            | GO:0051252 | P | 1293 | 1.04E-05 | 1.76E-03 |
| 10 | 4832 | M3 vs. S3 | - | Regulation  | Translation          | ribonucleoprotein complex                                      | GO:1990904 | C | 465  | 0.00E+00 | 0.00E+00 |
| 10 | 4833 | M3 vs. S3 | - | Regulation  | Translation          | ribonucleoprotein complex assembly                             | GO:0022618 | P | 122  | 9.96E-08 | 3.28E-05 |
| 10 | 4834 | M3 vs. S3 | - | Regulation  | Translation          | ribonucleoprotein complex biogenesis                           | GO:0022613 | P | 314  | 7.71E-08 | 2.88E-05 |
| 10 | 4835 | M3 vs. S3 | - | Regulation  | Translation          | ribonucleoprotein complex subunit organization                 | GO:0071826 | P | 125  | 2.41E-07 | 6.74E-05 |
| 10 | 4836 | M3 vs. S3 | - | Regulation  | Translation          | ribosomal large subunit assembly                               | GO:0000027 | P | 35   | 4.95E-05 | 6.30E-03 |
| 10 | 4837 | M3 vs. S3 | - | Regulation  | Translation          | ribosomal large subunit biogenesis                             | GO:0042273 | P | 84   | 6.33E-09 | 2.95E-06 |
| 10 | 4838 | M3 vs. S3 | - | Regulation  | Translation          | ribosomal small subunit assembly                               | GO:0000028 | P | 28   | 1.74E-07 | 5.42E-05 |
| 10 | 4839 | M3 vs. S3 | - | Regulation  | Translation          | ribosomal small subunit biogenesis                             | GO:0042274 | P | 65   | 2.75E-09 | 1.54E-06 |
| 10 | 4840 | M3 vs. S3 | - | Regulation  | Translation          | ribosomal subunit                                              | GO:0044391 | C | 235  | 0.00E+00 | 0.00E+00 |
| 10 | 4841 | M3 vs. S3 | - | Regulation  | Translation          | ribosome                                                       | GO:0005840 | C | 297  | 0.00E+00 | 0.00E+00 |
| 10 | 4842 | M3 vs. S3 | - | Regulation  | Translation          | ribosome assembly                                              | GO:0042255 | P | 68   | 8.16E-11 | 7.61E-08 |
| 10 | 4843 | M3 vs. S3 | - | Regulation  | Translation          | ribosome biogenesis                                            | GO:0042254 | P | 260  | 1.53E-08 | 6.57E-06 |
| 10 | 4844 | M3 vs. S3 | - | Regulation  | Translation          | rRNA binding                                                   | GO:0019843 | F | 51   | 5.40E-07 | 1.31E-04 |
| 10 | 4845 | M3 vs. S3 | - | Regulation  | Translation          | small nuclear ribonucleoprotein complex                        | GO:0030532 | C | 47   | 3.98E-04 | 9.23E-03 |
| 10 | 4846 | M3 vs. S3 | - | Regulation  | Translation          | small ribosomal subunit                                        | GO:0015935 | C | 101  | 1.05E-11 | 1.05E-09 |
| 10 | 4847 | M3 vs. S3 | - | Regulation  | Translation          | spliceosomal snRNP complex                                     | GO:0097525 | C | 47   | 3.98E-04 | 9.45E-03 |
| 10 | 4848 | M3 vs. S3 | - | Regulation  | Translation          | structural constituent of ribosome                             | GO:0003735 | F | 237  | 0.00E+00 | 0.00E+00 |
| 10 | 4849 | M3 vs. S3 | - | Regulation  | Translation          | translation                                                    | GO:0006412 | P | 359  | 0.00E+00 | 0.00E+00 |
| 10 | 4850 | M3 vs. S3 | - | Regulation  | Translation          | U1 snRNP                                                       | GO:0005685 | C | 17   | 5.63E-04 | 1.19E-02 |
| 11 | 4851 | F3 vs. S3 | + | Development | Cell division        | nucleobase-containing small molecule metabolic process         | GO:0055086 | P | 268  | 1.42E-07 | 5.12E-06 |
| 11 | 4852 | F3 vs. S3 | + | Development | Cell division        | nucleoside bisphosphate metabolic process                      | GO:0033865 | P | 50   | 2.43E-03 | 2.39E-02 |
| 11 | 4853 | F3 vs. S3 | + | Development | Cell division        | nucleoside phosphate binding                                   | GO:1901265 | F | 699  | 2.82E-04 | 6.24E-03 |
| 11 | 4854 | F3 vs. S3 | + | Development | Cell division        | nucleoside phosphate metabolic process                         | GO:0006753 | P | 201  | 7.66E-04 | 9.36E-03 |
| 11 | 4855 | F3 vs. S3 | + | Development | Cell division        | nucleotide binding                                             | GO:0000166 | F | 699  | 2.82E-04 | 6.29E-03 |
| 11 | 4856 | F3 vs. S3 | + | Development | Cell division        | nucleotide metabolic process                                   | GO:0009117 | P | 194  | 1.24E-03 | 1.41E-02 |
| 11 | 4857 | F3 vs. S3 | + | Development | Cell division        | nucleotide-sugar biosynthetic process                          | GO:0009226 | P | 34   | 1.69E-06 | 4.84E-05 |
| 11 | 4858 | F3 vs. S3 | + | Development | Cell division        | nucleotide-sugar metabolic process                             | GO:0009225 | P | 42   | 2.24E-06 | 6.20E-05 |
| 11 | 4859 | F3 vs. S3 | + | Development | Cell division        | pollen germination                                             | GO:0009846 | P | 40   | 1.49E-05 | 3.14E-04 |
| 11 | 4860 | F3 vs. S3 | + | Development | Cell division        | pollen tube development                                        | GO:0048868 | P | 121  | 4.67E-09 | 2.30E-07 |

|    |      |           |   |             |               |                                                 |            |   |      |          |          |
|----|------|-----------|---|-------------|---------------|-------------------------------------------------|------------|---|------|----------|----------|
| 11 | 4861 | F3 vs. S3 | + | Development | Cell division | pollen tube growth                              | GO:0009860 | P | 94   | 4.79E-09 | 2.32E-07 |
| 11 | 4862 | F3 vs. S3 | + | Development | Cell division | pollination                                     | GO:0009856 | P | 171  | 6.09E-10 | 3.52E-08 |
| 11 | 4863 | F3 vs. S3 | + | Development | Cell division | ribonucleoside bisphosphate metabolic process   | GO:0033875 | P | 50   | 2.43E-03 | 2.39E-02 |
| 11 | 4864 | F3 vs. S3 | + | Development | Cell division | ribonucleotide metabolic process                | GO:0009259 | P | 156  | 5.13E-04 | 6.67E-03 |
| 11 | 4865 | F3 vs. S3 | + | Development | Cell division | ribose phosphate metabolic process              | GO:0019693 | P | 162  | 4.50E-04 | 6.02E-03 |
| 11 | 4866 | F3 vs. S3 | + | Development | Development   | actin cytoskeleton                              | GO:0015629 | C | 42   | 5.37E-03 | 3.01E-02 |
| 11 | 4867 | F3 vs. S3 | + | Development | Development   | actin filament                                  | GO:0005884 | C | 9    | 6.86E-03 | 3.58E-02 |
| 11 | 4868 | F3 vs. S3 | + | Development | Development   | apical part of cell                             | GO:0045177 | C | 19   | 5.73E-04 | 4.27E-03 |
| 11 | 4869 | F3 vs. S3 | + | Development | Development   | apical plasma membrane                          | GO:0016324 | C | 17   | 1.54E-04 | 1.34E-03 |
| 11 | 4870 | F3 vs. S3 | + | Development | Development   | apoplast                                        | GO:0048046 | C | 196  | 4.44E-16 | 1.63E-14 |
| 11 | 4871 | F3 vs. S3 | + | Development | Development   | bounding membrane of organelle                  | GO:0098588 | C | 645  | 5.76E-03 | 3.19E-02 |
| 11 | 4872 | F3 vs. S3 | + | Development | Development   | cell development                                | GO:0048468 | P | 217  | 8.66E-04 | 1.05E-02 |
| 11 | 4873 | F3 vs. S3 | + | Development | Development   | cell growth                                     | GO:0016049 | P | 272  | 1.97E-05 | 3.92E-04 |
| 11 | 4874 | F3 vs. S3 | + | Development | Development   | cell morphogenesis                              | GO:0000902 | P | 252  | 4.42E-03 | 3.82E-02 |
| 11 | 4875 | F3 vs. S3 | + | Development | Development   | cell morphogenesis involved in differentiation  | GO:0000904 | P | 151  | 1.51E-03 | 1.63E-02 |
| 11 | 4876 | F3 vs. S3 | + | Development | Development   | cell periphery                                  | GO:0071944 | C | 2636 | 5.11E-08 | 9.21E-07 |
| 11 | 4877 | F3 vs. S3 | + | Development | Development   | cell pole                                       | GO:0060187 | C | 16   | 3.68E-03 | 2.23E-02 |
| 11 | 4878 | F3 vs. S3 | + | Development | Development   | cell projection                                 | GO:0042995 | C | 77   | 2.77E-08 | 5.49E-07 |
| 11 | 4879 | F3 vs. S3 | + | Development | Development   | cell surface                                    | GO:0009986 | C | 14   | 5.87E-03 | 3.23E-02 |
| 11 | 4880 | F3 vs. S3 | + | Development | Development   | cell tip                                        | GO:0051286 | C | 16   | 3.68E-03 | 2.21E-02 |
| 11 | 4881 | F3 vs. S3 | + | Development | Development   | cell tip growth                                 | GO:0009932 | P | 110  | 1.43E-07 | 5.11E-06 |
| 11 | 4882 | F3 vs. S3 | + | Development | Development   | cell wall                                       | GO:0005618 | C | 387  | 6.65E-03 | 3.53E-02 |
| 11 | 4883 | F3 vs. S3 | + | Development | Development   | cell wall biogenesis                            | GO:0042546 | P | 165  | 1.52E-06 | 4.42E-05 |
| 11 | 4884 | F3 vs. S3 | + | Development | Development   | cell wall modification                          | GO:0042545 | P | 125  | 1.73E-05 | 3.54E-04 |
| 11 | 4885 | F3 vs. S3 | + | Development | Development   | cell wall organization                          | GO:0071555 | P | 202  | 2.04E-04 | 3.04E-03 |
| 11 | 4886 | F3 vs. S3 | + | Development | Development   | cell wall organization or biogenesis            | GO:0071554 | P | 361  | 4.70E-09 | 2.29E-07 |
| 11 | 4887 | F3 vs. S3 | + | Development | Development   | cell wall pectin metabolic process              | GO:0052546 | P | 17   | 5.96E-03 | 4.85E-02 |
| 11 | 4888 | F3 vs. S3 | + | Development | Development   | cytoplasm                                       | GO:0005737 | C | 8718 | 3.75E-05 | 4.09E-04 |
| 11 | 4889 | F3 vs. S3 | + | Development | Development   | developmental cell growth                       | GO:0048588 | P | 135  | 3.57E-08 | 1.41E-06 |
| 11 | 4890 | F3 vs. S3 | + | Development | Development   | developmental growth                            | GO:0048589 | P | 273  | 1.88E-05 | 3.81E-04 |
| 11 | 4891 | F3 vs. S3 | + | Development | Development   | developmental growth involved in morphogenesis  | GO:0060560 | P | 238  | 3.18E-06 | 8.35E-05 |
| 11 | 4892 | F3 vs. S3 | + | Development | Development   | endomembrane system                             | GO:0012505 | C | 1530 | 1.50E-05 | 1.71E-04 |
| 11 | 4893 | F3 vs. S3 | + | Development | Development   | envelope                                        | GO:0031975 | C | 743  | 8.09E-05 | 7.71E-04 |
| 11 | 4894 | F3 vs. S3 | + | Development | Development   | external encapsulating structure                | GO:0030312 | C | 389  | 6.37E-03 | 3.43E-02 |
| 11 | 4895 | F3 vs. S3 | + | Development | Development   | external encapsulating structure organization   | GO:0045229 | P | 235  | 9.17E-06 | 2.12E-04 |
| 11 | 4896 | F3 vs. S3 | + | Development | Development   | extracellular matrix                            | GO:0031012 | C | 14   | 6.08E-03 | 3.33E-02 |
| 11 | 4897 | F3 vs. S3 | + | Development | Development   | extracellular region                            | GO:0005576 | C | 1547 | 7.77E-16 | 2.66E-14 |
| 11 | 4898 | F3 vs. S3 | + | Development | Development   | extracellular space                             | GO:0005615 | C | 74   | 1.36E-04 | 1.23E-03 |
| 11 | 4899 | F3 vs. S3 | + | Development | Development   | Golgi apparatus subcompartment                  | GO:0098791 | C | 312  | 1.41E-05 | 1.65E-04 |
| 11 | 4900 | F3 vs. S3 | + | Development | Development   | Golgi cisterna                                  | GO:0031985 | C | 132  | 8.71E-03 | 4.36E-02 |
| 11 | 4901 | F3 vs. S3 | + | Development | Development   | Golgi medial cisterna                           | GO:0005797 | C | 45   | 8.99E-03 | 4.46E-02 |
| 11 | 4902 | F3 vs. S3 | + | Development | Development   | Golgi trans cisterna                            | GO:0000138 | C | 58   | 2.16E-03 | 1.36E-02 |
| 11 | 4903 | F3 vs. S3 | + | Development | Development   | growing cell tip                                | GO:0035838 | C | 12   | 4.21E-03 | 2.45E-02 |
| 11 | 4904 | F3 vs. S3 | + | Development | Development   | growth                                          | GO:0040007 | P | 310  | 1.04E-04 | 1.67E-03 |
| 11 | 4905 | F3 vs. S3 | + | Development | Development   | hemicellulose metabolic process                 | GO:0010410 | P | 74   | 7.74E-06 | 1.83E-04 |
| 11 | 4906 | F3 vs. S3 | + | Development | Development   | integral component of membrane                  | GO:0016021 | C | 294  | 3.06E-04 | 2.37E-03 |
| 11 | 4907 | F3 vs. S3 | + | Development | Development   | integral component of plasma membrane           | GO:0005887 | C | 76   | 3.67E-05 | 4.05E-04 |
| 11 | 4908 | F3 vs. S3 | + | Development | Development   | intracellular vesicle                           | GO:0097708 | C | 503  | 1.15E-03 | 8.08E-03 |
| 11 | 4909 | F3 vs. S3 | + | Development | Development   | lytic vacuole                                   | GO:0000323 | C | 35   | 2.58E-05 | 2.91E-04 |
| 11 | 4910 | F3 vs. S3 | + | Development | Development   | membrane                                        | GO:0016020 | C | 3581 | 2.56E-11 | 6.19E-10 |
| 11 | 4911 | F3 vs. S3 | + | Development | Development   | microbody                                       | GO:0042579 | C | 215  | 2.93E-06 | 3.92E-05 |
| 11 | 4912 | F3 vs. S3 | + | Development | Development   | monolayer-surrounded lipid storage body         | GO:0012511 | C | 10   | 9.54E-03 | 4.68E-02 |
| 11 | 4913 | F3 vs. S3 | + | Development | Development   | multi-multicellular organism process            | GO:0044706 | P | 171  | 6.09E-10 | 3.56E-08 |
| 11 | 4914 | F3 vs. S3 | + | Development | Development   | organelle envelope                              | GO:0031967 | C | 743  | 8.09E-05 | 7.64E-04 |
| 11 | 4915 | F3 vs. S3 | + | Development | Development   | organelle subcompartment                        | GO:0031984 | C | 811  | 1.29E-11 | 3.21E-10 |
| 11 | 4916 | F3 vs. S3 | + | Development | Development   | plant-type cell wall biogenesis                 | GO:0009832 | P | 107  | 2.71E-03 | 2.60E-02 |
| 11 | 4917 | F3 vs. S3 | + | Development | Development   | plant-type cell wall organization or biogenesis | GO:0071669 | P | 190  | 3.30E-03 | 3.00E-02 |
| 11 | 4918 | F3 vs. S3 | + | Development | Development   | plant-type primary cell wall biogenesis         | GO:0009833 | P | 18   | 6.06E-03 | 4.92E-02 |
| 11 | 4919 | F3 vs. S3 | + | Development | Development   | plant-type vacuole                              | GO:0000325 | C | 112  | 5.65E-06 | 6.93E-05 |
| 11 | 4920 | F3 vs. S3 | + | Development | Development   | plant-type vacuole membrane                     | GO:0009705 | C | 80   | 4.50E-03 | 2.58E-02 |
| 11 | 4921 | F3 vs. S3 | + | Development | Development   | plasma membrane                                 | GO:0005886 | C | 2318 | 1.34E-06 | 1.95E-05 |
| 11 | 4922 | F3 vs. S3 | + | Development | Development   | plasma membrane bounded cell projection         | GO:0120025 | C | 66   | 8.68E-12 | 2.33E-10 |
| 11 | 4923 | F3 vs. S3 | + | Development | Development   | plasma membrane region                          | GO:0098590 | C | 38   | 4.08E-03 | 2.41E-02 |
| 11 | 4924 | F3 vs. S3 | + | Development | Development   | pollen tube                                     | GO:0090406 | C | 55   | 1.54E-10 | 3.40E-09 |

|    |      |           |   |             |               |                                                                                                                                                                                             |            |   |     |          |          |
|----|------|-----------|---|-------------|---------------|---------------------------------------------------------------------------------------------------------------------------------------------------------------------------------------------|------------|---|-----|----------|----------|
| 11 | 4925 | F3 vs. S3 | + | Development | Development   | pollen tube tip                                                                                                                                                                             | GO:0090404 | C | 12  | 4.21E-03 | 2.46E-02 |
| 11 | 4926 | F3 vs. S3 | + | Development | Development   | secretion                                                                                                                                                                                   | GO:0046903 | P | 53  | 3.15E-03 | 2.88E-02 |
| 11 | 4927 | F3 vs. S3 | + | Development | Development   | stromule                                                                                                                                                                                    | GO:0010319 | C | 34  | 3.93E-09 | 8.12E-08 |
| 11 | 4928 | F3 vs. S3 | + | Development | Development   | unidimensional cell growth                                                                                                                                                                  | GO:0009826 | P | 203 | 1.40E-05 | 2.97E-04 |
| 11 | 4929 | F3 vs. S3 | + | Development | Development   | vacuolar membrane                                                                                                                                                                           | GO:0005774 | C | 405 | 4.76E-04 | 3.64E-03 |
| 11 | 4930 | F3 vs. S3 | + | Development | Development   | vacuole                                                                                                                                                                                     | GO:0005773 | C | 757 | 4.19E-08 | 7.99E-07 |
| 11 | 4931 | F3 vs. S3 | + | Metabolism  | Bioenergetics | (1->3)-beta-D-glucan binding (NAD+) activity                                                                                                                                                | GO:0004029 | F | 9   | 7.44E-05 | 2.03E-03 |
| 11 | 4932 | F3 vs. S3 | + | Metabolism  | Bioenergetics | acyl-CoA metabolic process                                                                                                                                                                  | GO:0006637 | P | 36  | 1.62E-03 | 1.73E-02 |
| 11 | 4933 | F3 vs. S3 | + | Metabolism  | Bioenergetics | aerobic respiration                                                                                                                                                                         | GO:0009060 | P | 66  | 1.50E-03 | 1.63E-02 |
| 11 | 4934 | F3 vs. S3 | + | Metabolism  | Bioenergetics | alcohol dehydrogenase (NADP+) activity                                                                                                                                                      | GO:0008106 | F | 10  | 4.40E-04 | 9.11E-03 |
| 11 | 4935 | F3 vs. S3 | + | Metabolism  | Bioenergetics | aldehyde dehydrogenase [NAD(P)+] activity                                                                                                                                                   | GO:0004030 | F | 9   | 7.44E-05 | 2.05E-03 |
| 11 | 4936 | F3 vs. S3 | + | Metabolism  | Bioenergetics | alditol:NADP+ 1-oxidoreductase activity                                                                                                                                                     | GO:0004032 | F | 6   | 1.73E-03 | 2.86E-02 |
| 11 | 4937 | F3 vs. S3 | + | Metabolism  | Bioenergetics | aldo-keto reductase (NADP) activity                                                                                                                                                         | GO:0004033 | F | 11  | 2.29E-04 | 5.27E-03 |
|    |      |           |   |             |               | ATPase activity, coupled to transmembrane movement of ions, rotational mechanism                                                                                                            | GO:0044769 | F | 21  | 1.77E-04 | 4.42E-03 |
| 11 | 4938 | F3 vs. S3 | + | Metabolism  | Bioenergetics | carbohydrate biosynthetic process                                                                                                                                                           | GO:0016051 | P | 214 | 5.36E-12 | 4.49E-10 |
| 11 | 4939 | F3 vs. S3 | + | Metabolism  | Bioenergetics | carbohydrate catabolic process                                                                                                                                                              | GO:0016052 | P | 166 | 1.56E-10 | 1.03E-08 |
| 11 | 4940 | F3 vs. S3 | + | Metabolism  | Bioenergetics | carbohydrate derivative biosynthetic process                                                                                                                                                | GO:1901137 | P | 311 | 1.60E-05 | 3.28E-04 |
| 11 | 4941 | F3 vs. S3 | + | Metabolism  | Bioenergetics | carbohydrate derivative metabolic process                                                                                                                                                   | GO:1901135 | P | 506 | 1.61E-10 | 1.05E-08 |
| 11 | 4942 | F3 vs. S3 | + | Metabolism  | Bioenergetics | carbohydrate metabolic process                                                                                                                                                              | GO:0005975 | P | 640 | 0.00E+00 | 0.00E+00 |
| 11 | 4943 | F3 vs. S3 | + | Metabolism  | Bioenergetics | carbohydrate phosphatase activity                                                                                                                                                           | GO:0019203 | F | 20  | 1.13E-03 | 2.04E-02 |
| 11 | 4944 | F3 vs. S3 | + | Metabolism  | Bioenergetics | cellular carbohydrate biosynthetic process                                                                                                                                                  | GO:0034637 | P | 147 | 8.61E-07 | 2.71E-05 |
| 11 | 4945 | F3 vs. S3 | + | Metabolism  | Bioenergetics | cellular carbohydrate catabolic process                                                                                                                                                     | GO:0044275 | P | 34  | 4.53E-03 | 3.88E-02 |
| 11 | 4946 | F3 vs. S3 | + | Metabolism  | Bioenergetics | cellular carbohydrate metabolic process                                                                                                                                                     | GO:0044262 | P | 270 | 1.06E-11 | 8.60E-10 |
| 11 | 4947 | F3 vs. S3 | + | Metabolism  | Bioenergetics | cellular polysaccharide biosynthetic process                                                                                                                                                | GO:0033692 | P | 122 | 4.07E-05 | 7.38E-04 |
| 11 | 4948 | F3 vs. S3 | + | Metabolism  | Bioenergetics | cellular polysaccharide metabolic process                                                                                                                                                   | GO:0044264 | P | 188 | 8.98E-07 | 2.81E-05 |
| 11 | 4949 | F3 vs. S3 | + | Metabolism  | Bioenergetics | CoA-ligase activity                                                                                                                                                                         | GO:0016405 | F | 21  | 3.81E-05 | 1.15E-03 |
| 11 | 4950 | F3 vs. S3 | + | Metabolism  | Bioenergetics | disaccharide metabolic process                                                                                                                                                              | GO:0005984 | P | 54  | 2.15E-04 | 3.20E-03 |
| 11 | 4951 | F3 vs. S3 | + | Metabolism  | Bioenergetics | fatty acid biosynthetic process                                                                                                                                                             | GO:0006633 | P | 103 | 5.75E-03 | 4.73E-02 |
| 11 | 4952 | F3 vs. S3 | + | Metabolism  | Bioenergetics | fatty acid derivative metabolic process                                                                                                                                                     | GO:1901568 | P | 32  | 2.49E-03 | 2.43E-02 |
| 11 | 4953 | F3 vs. S3 | + | Metabolism  | Bioenergetics | fatty acid ligase activity                                                                                                                                                                  | GO:0015645 | F | 10  | 1.13E-03 | 2.05E-02 |
| 11 | 4954 | F3 vs. S3 | + | Metabolism  | Bioenergetics | fatty acid metabolic process                                                                                                                                                                | GO:0006631 | P | 166 | 6.58E-07 | 2.11E-05 |
| 11 | 4955 | F3 vs. S3 | + | Metabolism  | Bioenergetics | generation of precursor metabolites and energy                                                                                                                                              | GO:0006091 | P | 266 | 2.70E-09 | 1.39E-07 |
| 11 | 4956 | F3 vs. S3 | + | Metabolism  | Bioenergetics | gluconeogenesis                                                                                                                                                                             | GO:0006094 | P | 20  | 4.39E-04 | 5.89E-03 |
| 11 | 4957 | F3 vs. S3 | + | Metabolism  | Bioenergetics | glucose 6-phosphate metabolic process                                                                                                                                                       | GO:0051156 | P | 35  | 1.20E-03 | 1.37E-02 |
| 11 | 4958 | F3 vs. S3 | + | Metabolism  | Bioenergetics | glucose metabolic process                                                                                                                                                                   | GO:0006006 | P | 34  | 5.16E-03 | 4.33E-02 |
|    |      |           |   |             |               | glyceraldehyde-3-phosphate dehydrogenase (NAD+) (non-phosphorylating) activity                                                                                                              | GO:0043878 | F | 6   | 6.17E-04 | 1.20E-02 |
| 11 | 4960 | F3 vs. S3 | + | Metabolism  | Bioenergetics | hexose biosynthetic process                                                                                                                                                                 | GO:0019319 | P | 22  | 2.07E-04 | 3.08E-03 |
| 11 | 4961 | F3 vs. S3 | + | Metabolism  | Bioenergetics | hexose metabolic process                                                                                                                                                                    | GO:0019318 | P | 68  | 2.19E-05 | 4.28E-04 |
| 11 | 4962 | F3 vs. S3 | + | Metabolism  | Bioenergetics | isocitrate dehydrogenase (NAD+) activity                                                                                                                                                    | GO:0004449 | F | 5   | 1.32E-03 | 2.31E-02 |
| 11 | 4963 | F3 vs. S3 | + | Metabolism  | Bioenergetics | isocitrate dehydrogenase activity                                                                                                                                                           | GO:0004448 | F | 7   | 1.81E-04 | 4.44E-03 |
| 11 | 4964 | F3 vs. S3 | + | Metabolism  | Bioenergetics | isocitrate metabolic process                                                                                                                                                                | GO:0006102 | P | 10  | 8.70E-05 | 1.43E-03 |
| 11 | 4965 | F3 vs. S3 | + | Metabolism  | Bioenergetics | lipid oxidation                                                                                                                                                                             | GO:0034440 | P | 38  | 2.18E-03 | 2.21E-02 |
| 11 | 4966 | F3 vs. S3 | + | Metabolism  | Bioenergetics | medium-chain fatty acid-CoA ligase activity                                                                                                                                                 | GO:0031956 | F | 9   | 2.18E-03 | 3.46E-02 |
| 11 | 4967 | F3 vs. S3 | + | Metabolism  | Bioenergetics | monosaccharide biosynthetic process                                                                                                                                                         | GO:0046364 | P | 37  | 2.51E-04 | 3.64E-03 |
| 11 | 4968 | F3 vs. S3 | + | Metabolism  | Bioenergetics | NAD binding                                                                                                                                                                                 | GO:0051287 | F | 60  | 1.72E-05 | 5.81E-04 |
| 11 | 4969 | F3 vs. S3 | + | Metabolism  | Bioenergetics | NAD(P)H dehydrogenase complex (plastoquinone)                                                                                                                                               | GO:0010598 | C | 9   | 1.33E-03 | 8.88E-03 |
| 11 | 4970 | F3 vs. S3 | + | Metabolism  | Bioenergetics | NADP binding                                                                                                                                                                                | GO:0050661 | F | 50  | 2.15E-04 | 5.07E-03 |
| 11 | 4971 | F3 vs. S3 | + | Metabolism  | Bioenergetics | NADP metabolic process                                                                                                                                                                      | GO:0006739 | P | 38  | 2.65E-05 | 5.04E-04 |
| 11 | 4972 | F3 vs. S3 | + | Metabolism  | Bioenergetics | NADPH regeneration                                                                                                                                                                          | GO:0006740 | P | 31  | 3.28E-04 | 4.68E-03 |
| 11 | 4973 | F3 vs. S3 | + | Metabolism  | Bioenergetics | oligosaccharide metabolic process                                                                                                                                                           | GO:0009311 | P | 60  | 3.46E-04 | 4.82E-03 |
| 11 | 4974 | F3 vs. S3 | + | Metabolism  | Bioenergetics | oxidoreductase activity                                                                                                                                                                     | GO:0016491 | F | 925 | 0.00E+00 | 0.00E+00 |
| 11 | 4975 | F3 vs. S3 | + | Metabolism  | Bioenergetics | oxidoreductase activity, acting on CH-OH group of donors                                                                                                                                    | GO:0016614 | F | 144 | 4.33E-15 | 8.97E-13 |
| 11 | 4976 | F3 vs. S3 | + | Metabolism  | Bioenergetics | oxidoreductase activity, acting on NAD(P)H                                                                                                                                                  | GO:0016651 | F | 80  | 1.19E-04 | 3.07E-03 |
|    |      |           |   |             |               | oxidoreductase activity, acting on paired donors, with incorporation or reduction of molecular oxygen                                                                                       | GO:0016705 | F | 217 | 6.06E-05 | 1.72E-03 |
|    |      |           |   |             |               | oxidoreductase activity, acting on paired donors, with incorporation or reduction of molecular oxygen, reduced flavin or flavoprotein as one donor, and incorporation of one atom of oxygen | GO:0016712 | F | 4   | 1.19E-03 | 2.11E-02 |
| 11 | 4977 | F3 vs. S3 | + | Metabolism  | Bioenergetics |                                                                                                                                                                                             |            |   |     |          |          |
| 11 | 4978 | F3 vs. S3 | + | Metabolism  | Bioenergetics |                                                                                                                                                                                             |            |   |     |          |          |
| 11 | 4979 | F3 vs. S3 | + | Metabolism  | Bioenergetics |                                                                                                                                                                                             |            |   |     |          |          |



|    |      |           |   |            |               |                                                                                                                                                                                          |            |   |     |          |          |
|----|------|-----------|---|------------|---------------|------------------------------------------------------------------------------------------------------------------------------------------------------------------------------------------|------------|---|-----|----------|----------|
| 11 | 4980 | F3 vs. S3 | + | Metabolism | Bioenergetics | oxidoreductase activity, acting on paired donors, with incorporation or reduction of molecular oxygen, reduced iron-sulfur protein as one donor, and incorporation of one atom of oxygen | GO:0016713 | F | 7   | 6.35E-04 | 1.22E-02 |
| 11 | 4981 | F3 vs. S3 | + | Metabolism | Bioenergetics | oxidoreductase activity, acting on single donors with incorporation of molecular oxygen                                                                                                  | GO:0016701 | F | 30  | 1.88E-04 | 4.58E-03 |
| 11 | 4982 | F3 vs. S3 | + | Metabolism | Bioenergetics | oxidoreductase activity, acting on the aldehyde or oxo group of donors                                                                                                                   | GO:0016903 | F | 46  | 8.26E-07 | 3.68E-05 |
| 11 | 4983 | F3 vs. S3 | + | Metabolism | Bioenergetics | oxidoreductase activity, acting on the aldehyde or oxo group of donors, NAD or NADP as acceptor                                                                                          | GO:0016620 | F | 32  | 2.03E-07 | 1.13E-05 |
| 11 | 4984 | F3 vs. S3 | + | Metabolism | Bioenergetics | oxidoreductase activity, acting on the CH-CH group of donors                                                                                                                             | GO:0016627 | F | 57  | 3.17E-03 | 4.84E-02 |
| 11 | 4985 | F3 vs. S3 | + | Metabolism | Bioenergetics | oxidoreductase activity, acting on the CH-OH group of donors, NAD or NADP as acceptor                                                                                                    | GO:0016616 | F | 124 | 4.22E-15 | 9.41E-13 |
| 11 | 4986 | F3 vs. S3 | + | Metabolism | Bioenergetics | pentose-phosphate shunt                                                                                                                                                                  | GO:0006098 | P | 30  | 1.51E-04 | 2.31E-03 |
| 11 | 4987 | F3 vs. S3 | + | Metabolism | Bioenergetics | pentose-phosphate shunt, non-oxidative branch                                                                                                                                            | GO:0009052 | P | 5   | 3.01E-03 | 2.79E-02 |
| 11 | 4988 | F3 vs. S3 | + | Metabolism | Bioenergetics | polysaccharide biosynthetic process                                                                                                                                                      | GO:0000271 | P | 148 | 1.52E-06 | 4.43E-05 |
| 11 | 4989 | F3 vs. S3 | + | Metabolism | Bioenergetics | polysaccharide metabolic process                                                                                                                                                         | GO:0005976 | P | 296 | 1.78E-13 | 1.88E-11 |
| 11 | 4990 | F3 vs. S3 | + | Metabolism | Bioenergetics | proton transmembrane transport                                                                                                                                                           | GO:1902600 | P | 60  | 5.23E-07 | 1.72E-05 |
| 11 | 4991 | F3 vs. S3 | + | Metabolism | Bioenergetics | proton-exporting ATPase activity, phosphorylative mechanism                                                                                                                              | GO:0008553 | F | 13  | 3.77E-05 | 1.15E-03 |
| 11 | 4992 | F3 vs. S3 | + | Metabolism | Bioenergetics | proton-transporting ATPase activity, rotational mechanism                                                                                                                                | GO:0046961 | F | 21  | 1.77E-04 | 4.46E-03 |
| 11 | 4993 | F3 vs. S3 | + | Metabolism | Bioenergetics | proton-transporting two-sector ATPase complex                                                                                                                                            | GO:0016469 | C | 42  | 1.87E-03 | 1.20E-02 |
| 11 | 4994 | F3 vs. S3 | + | Metabolism | Bioenergetics | proton-transporting V-type ATPase complex                                                                                                                                                | GO:0033176 | C | 19  | 8.98E-03 | 4.48E-02 |
| 11 | 4995 | F3 vs. S3 | + | Metabolism | Bioenergetics | pyrophosphate hydrolysis-driven proton transmembrane transporter activity                                                                                                                | GO:0009678 | F | 34  | 1.12E-07 | 6.52E-06 |
| 11 | 4996 | F3 vs. S3 | + | Metabolism | Bioenergetics | pyruvate metabolic process                                                                                                                                                               | GO:0006090 | P | 57  | 1.35E-03 | 1.50E-02 |
| 11 | 4997 | F3 vs. S3 | + | Metabolism | Bioenergetics | reductive pentose-phosphate cycle                                                                                                                                                        | GO:0019253 | P | 14  | 3.08E-06 | 8.14E-05 |
| 11 | 4998 | F3 vs. S3 | + | Metabolism | Bioenergetics | sucrose metabolic process                                                                                                                                                                | GO:0005985 | P | 41  | 6.12E-05 | 1.07E-03 |
| 11 | 4999 | F3 vs. S3 | + | Metabolism | Bioenergetics | tricarboxylic acid cycle                                                                                                                                                                 | GO:0006099 | P | 36  | 3.08E-05 | 5.68E-04 |
| 11 | 5000 | F3 vs. S3 | + | Metabolism | Bioenergetics | tricarboxylic acid metabolic process                                                                                                                                                     | GO:0072350 | P | 14  | 2.12E-05 | 4.19E-04 |
| 11 | 5001 | F3 vs. S3 | + | Metabolism | Bioenergetics | very long-chain fatty acid metabolic process                                                                                                                                             | GO:0000038 | P | 32  | 1.41E-03 | 1.55E-02 |
| 11 | 5002 | F3 vs. S3 | + | Metabolism | Catabolism    | alpha-amino acid catabolic process                                                                                                                                                       | GO:1901606 | P | 69  | 2.61E-09 | 1.36E-07 |
| 11 | 5003 | F3 vs. S3 | + | Metabolism | Catabolism    | aminopeptidase activity                                                                                                                                                                  | GO:0004177 | F | 18  | 3.27E-03 | 4.97E-02 |
| 11 | 5004 | F3 vs. S3 | + | Metabolism | Catabolism    | aromatic amino acid family catabolic process                                                                                                                                             | GO:0009074 | P | 18  | 3.64E-04 | 4.99E-03 |
| 11 | 5005 | F3 vs. S3 | + | Metabolism | Catabolism    | carboxylic acid catabolic process                                                                                                                                                        | GO:0046395 | P | 124 | 3.29E-10 | 2.03E-08 |
| 11 | 5006 | F3 vs. S3 | + | Metabolism | Catabolism    | catabolic process                                                                                                                                                                        | GO:0009056 | P | 956 | 3.55E-10 | 2.16E-08 |
| 11 | 5007 | F3 vs. S3 | + | Metabolism | Catabolism    | cellular amino acid catabolic process                                                                                                                                                    | GO:0009063 | P | 76  | 9.30E-08 | 3.48E-06 |
| 11 | 5008 | F3 vs. S3 | + | Metabolism | Catabolism    | cellular catabolic process                                                                                                                                                               | GO:0044248 | P | 791 | 1.35E-05 | 2.94E-04 |
| 11 | 5009 | F3 vs. S3 | + | Metabolism | Catabolism    | cysteine-type endopeptidase activity                                                                                                                                                     | GO:0004197 | F | 55  | 1.77E-03 | 2.91E-02 |
| 11 | 5010 | F3 vs. S3 | + | Metabolism | Catabolism    | dicarboxylic acid catabolic process                                                                                                                                                      | GO:0043649 | P | 11  | 1.16E-03 | 1.34E-02 |
| 11 | 5011 | F3 vs. S3 | + | Metabolism | Catabolism    | lipid catabolic process                                                                                                                                                                  | GO:0016042 | P | 76  | 4.46E-03 | 3.84E-02 |
| 11 | 5012 | F3 vs. S3 | + | Metabolism | Catabolism    | lysosome                                                                                                                                                                                 | GO:0005764 | C | 31  | 9.63E-06 | 1.15E-04 |
| 11 | 5013 | F3 vs. S3 | + | Metabolism | Catabolism    | monocarboxylic acid catabolic process                                                                                                                                                    | GO:0072329 | P | 48  | 1.70E-04 | 2.59E-03 |
| 11 | 5014 | F3 vs. S3 | + | Metabolism | Catabolism    | organic acid catabolic process                                                                                                                                                           | GO:0016054 | P | 124 | 3.29E-10 | 2.05E-08 |
| 11 | 5015 | F3 vs. S3 | + | Metabolism | Catabolism    | organic cyclic compound catabolic process                                                                                                                                                | GO:1901361 | P | 135 | 4.92E-03 | 4.16E-02 |
| 11 | 5016 | F3 vs. S3 | + | Metabolism | Catabolism    | organic hydroxy compound catabolic process                                                                                                                                               | GO:1901616 | P | 29  | 5.44E-03 | 4.52E-02 |
| 11 | 5017 | F3 vs. S3 | + | Metabolism | Catabolism    | organic substance catabolic process                                                                                                                                                      | GO:1901575 | P | 874 | 2.42E-08 | 1.02E-06 |
| 11 | 5018 | F3 vs. S3 | + | Metabolism | Catabolism    | pectin catabolic process                                                                                                                                                                 | GO:0045490 | P | 70  | 1.76E-06 | 4.96E-05 |
| 11 | 5019 | F3 vs. S3 | + | Metabolism | Catabolism    | peroxisome                                                                                                                                                                               | GO:0005777 | C | 215 | 2.93E-06 | 3.87E-05 |
| 11 | 5020 | F3 vs. S3 | + | Metabolism | Catabolism    | polysaccharide catabolic process                                                                                                                                                         | GO:0000272 | P | 101 | 2.57E-08 | 1.05E-06 |
| 11 | 5021 | F3 vs. S3 | + | Metabolism | Catabolism    | PSII associated light-harvesting complex II catabolic process                                                                                                                            | GO:0010304 | P | 5   | 1.70E-03 | 1.80E-02 |
| 11 | 5022 | F3 vs. S3 | + | Metabolism | Catabolism    | small molecule catabolic process                                                                                                                                                         | GO:0044282 | P | 176 | 1.67E-11 | 1.28E-09 |
| 11 | 5023 | F3 vs. S3 | + | Metabolism | Catabolism    | tyrosine catabolic process                                                                                                                                                               | GO:0006572 | P | 5   | 4.53E-03 | 3.87E-02 |
| 11 | 5024 | F3 vs. S3 | + | Metabolism | Metabolism    | acid-thiol ligase activity                                                                                                                                                               | GO:0016878 | F | 25  | 4.61E-06 | 1.61E-04 |
| 11 | 5025 | F3 vs. S3 | + | Metabolism | Metabolism    | acylglycerol lipase activity                                                                                                                                                             | GO:0047372 | F | 11  | 1.13E-03 | 2.06E-02 |
| 11 | 5026 | F3 vs. S3 | + | Metabolism | Metabolism    | alcohol biosynthetic process                                                                                                                                                             | GO:0046165 | P | 37  | 2.41E-03 | 2.38E-02 |
| 11 | 5027 | F3 vs. S3 | + | Metabolism | Metabolism    | alcohol metabolic process                                                                                                                                                                | GO:0006066 | P | 79  | 3.03E-05 | 5.61E-04 |
| 11 | 5028 | F3 vs. S3 | + | Metabolism | Metabolism    | aldehyde-lyase activity                                                                                                                                                                  | GO:0016832 | F | 17  | 5.42E-04 | 1.08E-02 |
| 11 | 5029 | F3 vs. S3 | + | Metabolism | Metabolism    | alkane 1-monoxygenase activity                                                                                                                                                           | GO:0018685 | F | 6   | 8.00E-04 | 1.48E-02 |
| 11 | 5030 | F3 vs. S3 | + | Metabolism | Metabolism    | alpha-amino acid biosynthetic process                                                                                                                                                    | GO:1901607 | P | 124 | 1.42E-07 | 5.13E-06 |
| 11 | 5031 | F3 vs. S3 | + | Metabolism | Metabolism    | alpha-amino acid metabolic process                                                                                                                                                       | GO:1901605 | P | 197 | 2.33E-15 | 2.97E-13 |
| 11 | 5032 | F3 vs. S3 | + | Metabolism | Metabolism    | amine biosynthetic process                                                                                                                                                               | GO:0009309 | P | 27  | 1.03E-03 | 1.21E-02 |
| 11 | 5033 | F3 vs. S3 | + | Metabolism | Metabolism    | amine metabolic process                                                                                                                                                                  | GO:0009308 | P | 69  | 3.23E-04 | 4.64E-03 |
| 11 | 5034 | F3 vs. S3 | + | Metabolism | Metabolism    | anion binding                                                                                                                                                                            | GO:0043168 | F | 867 | 2.62E-06 | 1.03E-04 |
| 11 | 5035 | F3 vs. S3 | + | Metabolism | Metabolism    | anthocyanin-containing compound biosynthetic process                                                                                                                                     | GO:0009718 | P | 11  | 2.15E-03 | 2.18E-02 |

|    |      |           |   |            |            |                                                                               |            |   |      |          |          |
|----|------|-----------|---|------------|------------|-------------------------------------------------------------------------------|------------|---|------|----------|----------|
| 11 | 5036 | F3 vs. S3 | + | Metabolism | Metabolism | aromatase activity                                                            | GO:0070330 | F | 4    | 1.19E-03 | 2.12E-02 |
| 11 | 5037 | F3 vs. S3 | + | Metabolism | Metabolism | aromatic amino acid family metabolic process                                  | GO:0009072 | P | 63   | 4.62E-04 | 6.13E-03 |
| 11 | 5038 | F3 vs. S3 | + | Metabolism | Metabolism | aromatic compound biosynthetic process                                        | GO:0019438 | P | 533  | 3.91E-03 | 3.47E-02 |
| 11 | 5039 | F3 vs. S3 | + | Metabolism | Metabolism | aspartate family amino acid metabolic process                                 | GO:0009066 | P | 41   | 1.53E-03 | 1.65E-02 |
| 11 | 5040 | F3 vs. S3 | + | Metabolism | Metabolism | capsule organization                                                          | GO:0045230 | P | 6    | 3.32E-04 | 4.72E-03 |
| 11 | 5041 | F3 vs. S3 | + | Metabolism | Metabolism | capsule polysaccharide biosynthetic process                                   | GO:0045227 | P | 6    | 3.32E-04 | 4.71E-03 |
| 11 | 5042 | F3 vs. S3 | + | Metabolism | Metabolism | carbon utilization                                                            | GO:0015976 | P | 8    | 1.10E-03 | 1.29E-02 |
| 11 | 5043 | F3 vs. S3 | + | Metabolism | Metabolism | carbon-carbon lyase activity                                                  | GO:0016830 | F | 75   | 7.57E-10 | 6.10E-08 |
| 11 | 5044 | F3 vs. S3 | + | Metabolism | Metabolism | carbon-oxygen lyase activity                                                  | GO:0016835 | F | 108  | 1.80E-04 | 4.46E-03 |
| 11 | 5045 | F3 vs. S3 | + | Metabolism | Metabolism | carboxylic acid biosynthetic process                                          | GO:0046394 | P | 336  | 1.40E-11 | 1.09E-09 |
| 11 | 5046 | F3 vs. S3 | + | Metabolism | Metabolism | carboxylic acid metabolic process                                             | GO:0019752 | P | 651  | 0.00E+00 | 0.00E+00 |
| 11 | 5047 | F3 vs. S3 | + | Metabolism | Metabolism | carboxylic ester hydrolase activity                                           | GO:0052689 | F | 136  | 4.88E-07 | 2.40E-05 |
| 11 | 5048 | F3 vs. S3 | + | Metabolism | Metabolism | carboxy-lyase activity                                                        | GO:0016831 | F | 40   | 4.27E-06 | 1.53E-04 |
| 11 | 5049 | F3 vs. S3 | + | Metabolism | Metabolism | catalytic activity                                                            | GO:0003824 | F | 5213 | 0.00E+00 | 0.00E+00 |
| 11 | 5050 | F3 vs. S3 | + | Metabolism | Metabolism | cation binding                                                                | GO:0043169 | F | 1019 | 1.32E-12 | 1.74E-10 |
| 11 | 5051 | F3 vs. S3 | + | Metabolism | Metabolism | cell wall macromolecule biosynthetic process                                  | GO:0044038 | P | 56   | 2.24E-03 | 2.25E-02 |
| 11 | 5052 | F3 vs. S3 | + | Metabolism | Metabolism | cell wall macromolecule metabolic process                                     | GO:0044036 | P | 118  | 2.17E-06 | 6.02E-05 |
| 11 | 5053 | F3 vs. S3 | + | Metabolism | Metabolism | cell wall polysaccharide biosynthetic process                                 | GO:0070592 | P | 53   | 3.69E-03 | 3.29E-02 |
| 11 | 5054 | F3 vs. S3 | + | Metabolism | Metabolism | cell wall polysaccharide metabolic process                                    | GO:0010383 | P | 97   | 1.12E-05 | 2.47E-04 |
| 11 | 5055 | F3 vs. S3 | + | Metabolism | Metabolism | cellular aldehyde metabolic process                                           | GO:0006081 | P | 37   | 3.96E-04 | 5.39E-03 |
| 11 | 5056 | F3 vs. S3 | + | Metabolism | Metabolism | cellular amine metabolic process                                              | GO:0044106 | P | 42   | 8.72E-05 | 1.43E-03 |
| 11 | 5057 | F3 vs. S3 | + | Metabolism | Metabolism | cellular amino acid biosynthetic process                                      | GO:0008652 | P | 139  | 3.71E-08 | 1.44E-06 |
| 11 | 5058 | F3 vs. S3 | + | Metabolism | Metabolism | cellular amino acid metabolic process                                         | GO:0006520 | P | 269  | 5.14E-13 | 4.89E-11 |
| 11 | 5059 | F3 vs. S3 | + | Metabolism | Metabolism | cellular biogenic amine biosynthetic process                                  | GO:0042401 | P | 27   | 1.03E-03 | 1.21E-02 |
| 11 | 5060 | F3 vs. S3 | + | Metabolism | Metabolism | cellular biogenic amine metabolic process                                     | GO:0006576 | P | 42   | 8.72E-05 | 1.43E-03 |
| 11 | 5061 | F3 vs. S3 | + | Metabolism | Metabolism | cellular component macromolecule biosynthetic process                         | GO:0070589 | P | 56   | 2.24E-03 | 2.25E-02 |
| 11 | 5062 | F3 vs. S3 | + | Metabolism | Metabolism | cellular glucan metabolic process                                             | GO:0006073 | P | 142  | 4.35E-03 | 3.76E-02 |
| 11 | 5063 | F3 vs. S3 | + | Metabolism | Metabolism | cellular lipid metabolic process                                              | GO:0044255 | P | 463  | 2.41E-09 | 1.27E-07 |
| 11 | 5064 | F3 vs. S3 | + | Metabolism | Metabolism | cellular modified amino acid metabolic process                                | GO:0006575 | P | 61   | 2.16E-04 | 3.20E-03 |
| 11 | 5065 | F3 vs. S3 | + | Metabolism | Metabolism | cellulose synthase (UDP-forming) activity                                     | GO:0016760 | F | 18   | 2.14E-03 | 3.42E-02 |
| 11 | 5066 | F3 vs. S3 | + | Metabolism | Metabolism | copper ion binding                                                            | GO:0005507 | F | 146  | 4.21E-05 | 1.26E-03 |
| 11 | 5067 | F3 vs. S3 | + | Metabolism | Metabolism | dicarboxylic acid metabolic process                                           | GO:0043648 | P | 63   | 1.59E-06 | 4.57E-05 |
| 11 | 5068 | F3 vs. S3 | + | Metabolism | Metabolism | erythrose 4-phosphate/phosphoenolpyruvate family amino acid metabolic process | GO:1902221 | P | 21   | 2.51E-03 | 2.43E-02 |
| 11 | 5069 | F3 vs. S3 | + | Metabolism | Metabolism | establishment of localization                                                 | GO:0051234 | P | 1508 | 1.79E-06 | 5.02E-05 |
| 11 | 5070 | F3 vs. S3 | + | Metabolism | Metabolism | extracellular polysaccharide biosynthetic process                             | GO:0045226 | P | 6    | 3.32E-04 | 4.70E-03 |
| 11 | 5071 | F3 vs. S3 | + | Metabolism | Metabolism | extracellular polysaccharide metabolic process                                | GO:0046379 | P | 6    | 3.32E-04 | 4.68E-03 |
| 11 | 5072 | F3 vs. S3 | + | Metabolism | Metabolism | flavin adenine dinucleotide binding                                           | GO:0050660 | F | 106  | 1.64E-03 | 2.77E-02 |
| 11 | 5073 | F3 vs. S3 | + | Metabolism | Metabolism | flavonol 3-O-glucosyltransferase activity                                     | GO:0047893 | F | 8    | 1.53E-03 | 2.59E-02 |
| 11 | 5074 | F3 vs. S3 | + | Metabolism | Metabolism | galactose metabolic process                                                   | GO:0006012 | P | 22   | 1.49E-03 | 1.62E-02 |
| 11 | 5075 | F3 vs. S3 | + | Metabolism | Metabolism | galacturonan metabolic process                                                | GO:0010393 | P | 115  | 8.85E-09 | 4.07E-07 |
| 11 | 5076 | F3 vs. S3 | + | Metabolism | Metabolism | glucan metabolic process                                                      | GO:0044042 | P | 149  | 9.73E-04 | 1.16E-02 |
| 11 | 5077 | F3 vs. S3 | + | Metabolism | Metabolism | glucosinolate biosynthetic process                                            | GO:0019761 | P | 29   | 5.67E-06 | 1.40E-04 |
| 11 | 5078 | F3 vs. S3 | + | Metabolism | Metabolism | glucosyltransferase activity                                                  | GO:0046527 | F | 143  | 4.01E-14 | 7.75E-12 |
| 11 | 5079 | F3 vs. S3 | + | Metabolism | Metabolism | glutamate metabolic process                                                   | GO:0006536 | P | 21   | 4.09E-04 | 5.54E-03 |
| 11 | 5080 | F3 vs. S3 | + | Metabolism | Metabolism | glutamine family amino acid biosynthetic process                              | GO:0009084 | P | 24   | 2.05E-03 | 2.09E-02 |
| 11 | 5081 | F3 vs. S3 | + | Metabolism | Metabolism | glutamine family amino acid metabolic process                                 | GO:0009064 | P | 45   | 1.12E-06 | 3.40E-05 |
| 11 | 5082 | F3 vs. S3 | + | Metabolism | Metabolism | glutamine metabolic process                                                   | GO:0006541 | P | 13   | 6.74E-04 | 8.46E-03 |
| 11 | 5083 | F3 vs. S3 | + | Metabolism | Metabolism | glycine biosynthetic process                                                  | GO:0006545 | P | 9    | 4.32E-03 | 3.75E-02 |
| 11 | 5084 | F3 vs. S3 | + | Metabolism | Metabolism | glycine metabolic process                                                     | GO:0006544 | P | 15   | 6.75E-04 | 8.45E-03 |
| 11 | 5085 | F3 vs. S3 | + | Metabolism | Metabolism | glycosinolate biosynthetic process                                            | GO:0019758 | P | 29   | 5.67E-06 | 1.39E-04 |
| 11 | 5086 | F3 vs. S3 | + | Metabolism | Metabolism | glycosyl compound biosynthetic process                                        | GO:1901659 | P | 47   | 9.64E-05 | 1.56E-03 |
| 11 | 5087 | F3 vs. S3 | + | Metabolism | Metabolism | glycosyl compound metabolic process                                           | GO:1901657 | P | 126  | 1.38E-03 | 1.53E-02 |
| 11 | 5088 | F3 vs. S3 | + | Metabolism | Metabolism | heme binding                                                                  | GO:0020037 | F | 196  | 1.80E-05 | 5.99E-04 |
| 11 | 5089 | F3 vs. S3 | + | Metabolism | Metabolism | hydrogen sulfide metabolic process                                            | GO:0070813 | P | 7    | 4.90E-03 | 4.15E-02 |
| 11 | 5090 | F3 vs. S3 | + | Metabolism | Metabolism | hydrolase activity                                                            | GO:0016787 | F | 1856 | 2.38E-09 | 1.77E-07 |
| 11 | 5091 | F3 vs. S3 | + | Metabolism | Metabolism | hydrolase activity, acting on ester bonds                                     | GO:0016788 | F | 617  | 2.34E-06 | 9.57E-05 |
| 11 | 5092 | F3 vs. S3 | + | Metabolism | Metabolism | hydrolase activity, acting on glycosyl bonds                                  | GO:0016798 | F | 307  | 8.29E-05 | 2.23E-03 |
| 11 | 5093 | F3 vs. S3 | + | Metabolism | Metabolism | hydrolase activity, hydrolyzing O-glycosyl compounds                          | GO:0004553 | F | 250  | 2.24E-07 | 1.20E-05 |
| 11 | 5094 | F3 vs. S3 | + | Metabolism | Metabolism | hydro-lyase activity                                                          | GO:0016836 | F | 61   | 2.00E-04 | 4.84E-03 |
| 11 | 5095 | F3 vs. S3 | + | Metabolism | Metabolism | indole-containing compound metabolic process                                  | GO:0042430 | P | 48   | 1.54E-03 | 1.65E-02 |
| 11 | 5096 | F3 vs. S3 | + | Metabolism | Metabolism | intramolecular oxidoreductase activity                                        | GO:0016860 | F | 43   | 6.62E-04 | 1.26E-02 |
| 11 | 5097 | F3 vs. S3 | + | Metabolism | Metabolism | intramolecular oxidoreductase activity, interconverting aldoses and ketoses   | GO:0016861 | F | 15   | 4.47E-04 | 9.20E-03 |

|    |      |           |   |            |            |                                                              |            |   |      |          |          |
|----|------|-----------|---|------------|------------|--------------------------------------------------------------|------------|---|------|----------|----------|
| 11 | 5098 | F3 vs. S3 | + | Metabolism | Metabolism | ion binding                                                  | GO:0043167 | F | 1775 | 1.44E-13 | 2.46E-11 |
| 11 | 5099 | F3 vs. S3 | + | Metabolism | Metabolism | iron ion binding                                             | GO:0005506 | F | 174  | 2.11E-04 | 5.02E-03 |
| 11 | 5100 | F3 vs. S3 | + | Metabolism | Metabolism | isoprenoid biosynthetic process                              | GO:0008299 | P | 101  | 1.67E-03 | 1.77E-02 |
| 11 | 5101 | F3 vs. S3 | + | Metabolism | Metabolism | isoprenoid metabolic process                                 | GO:0006720 | P | 122  | 2.36E-03 | 2.35E-02 |
| 11 | 5102 | F3 vs. S3 | + | Metabolism | Metabolism | leucine biosynthetic process                                 | GO:0009098 | P | 10   | 2.03E-03 | 2.09E-02 |
| 11 | 5103 | F3 vs. S3 | + | Metabolism | Metabolism | leucine metabolic process                                    | GO:0006551 | P | 17   | 5.23E-04 | 6.77E-03 |
| 11 | 5104 | F3 vs. S3 | + | Metabolism | Metabolism | ligase activity                                              | GO:0016874 | F | 141  | 3.12E-05 | 9.64E-04 |
| 11 | 5105 | F3 vs. S3 | + | Metabolism | Metabolism | ligase activity, forming carbon-sulfur bonds                 | GO:0016877 | F | 33   | 8.27E-05 | 2.24E-03 |
| 11 | 5106 | F3 vs. S3 | + | Metabolism | Metabolism | lignin biosynthetic process                                  | GO:0009809 | P | 31   | 7.26E-05 | 1.24E-03 |
| 11 | 5107 | F3 vs. S3 | + | Metabolism | Metabolism | lignin metabolic process                                     | GO:0009808 | P | 40   | 3.18E-06 | 8.36E-05 |
| 11 | 5108 | F3 vs. S3 | + | Metabolism | Metabolism | lipase activity                                              | GO:0016298 | F | 67   | 1.90E-03 | 3.08E-02 |
| 11 | 5109 | F3 vs. S3 | + | Metabolism | Metabolism | lipid biosynthetic process                                   | GO:0008610 | P | 349  | 7.37E-05 | 1.26E-03 |
| 11 | 5110 | F3 vs. S3 | + | Metabolism | Metabolism | lipid metabolic process                                      | GO:0006629 | P | 551  | 6.82E-09 | 3.16E-07 |
| 11 | 5111 | F3 vs. S3 | + | Metabolism | Metabolism | lipid modification                                           | GO:0030258 | P | 68   | 4.70E-04 | 6.23E-03 |
| 11 | 5112 | F3 vs. S3 | + | Metabolism | Metabolism | lipid storage                                                | GO:0019915 | P | 15   | 5.76E-03 | 4.74E-02 |
| 11 | 5113 | F3 vs. S3 | + | Metabolism | Metabolism | localization                                                 | GO:0051179 | P | 1616 | 1.91E-05 | 3.86E-04 |
| 11 | 5114 | F3 vs. S3 | + | Metabolism | Metabolism | L-phenylalanine metabolic process                            | GO:0006558 | P | 21   | 2.51E-03 | 2.43E-02 |
| 11 | 5115 | F3 vs. S3 | + | Metabolism | Metabolism | L-serine metabolic process                                   | GO:0006563 | P | 20   | 2.37E-03 | 2.35E-02 |
| 11 | 5116 | F3 vs. S3 | + | Metabolism | Metabolism | lyase activity                                               | GO:0016829 | F | 229  | 2.12E-12 | 2.67E-10 |
| 11 | 5117 | F3 vs. S3 | + | Metabolism | Metabolism | magnesium ion binding                                        | GO:0000287 | F | 82   | 2.69E-04 | 6.05E-03 |
| 11 | 5118 | F3 vs. S3 | + | Metabolism | Metabolism | manganese ion binding                                        | GO:0030145 | F | 35   | 4.14E-04 | 8.69E-03 |
| 11 | 5119 | F3 vs. S3 | + | Metabolism | Metabolism | metabolic process                                            | GO:0008152 | P | 5491 | 1.29E-05 | 2.82E-04 |
| 11 | 5120 | F3 vs. S3 | + | Metabolism | Metabolism | metal ion binding                                            | GO:0046872 | F | 1001 | 6.97E-12 | 6.74E-10 |
| 11 | 5121 | F3 vs. S3 | + | Metabolism | Metabolism | monocarboxylic acid biosynthetic process                     | GO:0072330 | P | 164  | 2.39E-05 | 4.60E-04 |
| 11 | 5122 | F3 vs. S3 | + | Metabolism | Metabolism | monocarboxylic acid metabolic process                        | GO:0032787 | P | 334  | 1.13E-12 | 1.04E-10 |
| 11 | 5123 | F3 vs. S3 | + | Metabolism | Metabolism | monooxygenase activity                                       | GO:0004497 | F | 130  | 1.65E-03 | 2.76E-02 |
| 11 | 5124 | F3 vs. S3 | + | Metabolism | Metabolism | monosaccharide metabolic process                             | GO:0005996 | P | 94   | 2.85E-07 | 9.82E-06 |
| 11 | 5125 | F3 vs. S3 | + | Metabolism | Metabolism | monovalent cation:proton antiporter activity                 | GO:0005451 | F | 35   | 1.50E-04 | 3.83E-03 |
| 11 | 5126 | F3 vs. S3 | + | Metabolism | Metabolism | oligopeptide binding                                         | GO:1900750 | F | 14   | 2.00E-03 | 3.20E-02 |
| 11 | 5127 | F3 vs. S3 | + | Metabolism | Metabolism | organic acid biosynthetic process                            | GO:0016053 | P | 336  | 1.40E-11 | 1.11E-09 |
| 11 | 5128 | F3 vs. S3 | + | Metabolism | Metabolism | organic acid metabolic process                               | GO:0006082 | P | 725  | 0.00E+00 | 0.00E+00 |
| 11 | 5129 | F3 vs. S3 | + | Metabolism | Metabolism | organic cyclic compound biosynthetic process                 | GO:1901362 | P | 598  | 1.72E-03 | 1.80E-02 |
| 11 | 5130 | F3 vs. S3 | + | Metabolism | Metabolism | organic hydroxy compound biosynthetic process                | GO:1901617 | P | 112  | 4.09E-04 | 5.55E-03 |
| 11 | 5131 | F3 vs. S3 | + | Metabolism | Metabolism | organic hydroxy compound metabolic process                   | GO:1901615 | P | 195  | 5.17E-06 | 1.30E-04 |
| 11 | 5132 | F3 vs. S3 | + | Metabolism | Metabolism | organophosphate biosynthetic process                         | GO:0090407 | P | 233  | 5.25E-03 | 4.37E-02 |
| 11 | 5133 | F3 vs. S3 | + | Metabolism | Metabolism | organophosphate metabolic process                            | GO:0019637 | P | 400  | 2.08E-07 | 7.26E-06 |
| 11 | 5134 | F3 vs. S3 | + | Metabolism | Metabolism | oxidation-reduction process                                  | GO:0055114 | P | 526  | 1.24E-14 | 1.52E-12 |
| 11 | 5135 | F3 vs. S3 | + | Metabolism | Metabolism | oxoacid metabolic process                                    | GO:0043436 | P | 723  | 0.00E+00 | 0.00E+00 |
| 11 | 5136 | F3 vs. S3 | + | Metabolism | Metabolism | pectin biosynthetic process                                  | GO:0045489 | P | 36   | 6.49E-04 | 8.26E-03 |
| 11 | 5137 | F3 vs. S3 | + | Metabolism | Metabolism | pectin metabolic process                                     | GO:0045488 | P | 114  | 3.26E-09 | 1.63E-07 |
| 11 | 5138 | F3 vs. S3 | + | Metabolism | Metabolism | pectinesterase activity                                      | GO:0030599 | F | 53   | 2.46E-07 | 1.30E-05 |
| 11 | 5139 | F3 vs. S3 | + | Metabolism | Metabolism | pectinesterase inhibitor activity                            | GO:0046910 | F | 41   | 1.70E-06 | 7.15E-05 |
| 11 | 5140 | F3 vs. S3 | + | Metabolism | Metabolism | pentose metabolic process                                    | GO:0019321 | P | 13   | 1.31E-03 | 1.47E-02 |
| 11 | 5141 | F3 vs. S3 | + | Metabolism | Metabolism | phenylpropanoid biosynthetic process                         | GO:0009699 | P | 63   | 4.19E-05 | 7.56E-04 |
| 11 | 5142 | F3 vs. S3 | + | Metabolism | Metabolism | phenylpropanoid metabolic process                            | GO:0009698 | P | 76   | 1.36E-06 | 4.05E-05 |
| 11 | 5143 | F3 vs. S3 | + | Metabolism | Metabolism | phosphate-containing compound metabolic process              | GO:0006796 | P | 1169 | 3.40E-08 | 1.35E-06 |
| 11 | 5144 | F3 vs. S3 | + | Metabolism | Metabolism | phosphoric ester hydrolase activity                          | GO:0042578 | F | 252  | 2.28E-05 | 7.42E-04 |
| 11 | 5145 | F3 vs. S3 | + | Metabolism | Metabolism | phosphorus metabolic process                                 | GO:0006793 | P | 1205 | 3.55E-10 | 2.14E-08 |
| 11 | 5146 | F3 vs. S3 | + | Metabolism | Metabolism | pigment biosynthetic process                                 | GO:0046148 | P | 82   | 1.45E-03 | 1.59E-02 |
| 11 | 5147 | F3 vs. S3 | + | Metabolism | Metabolism | pigment metabolic process                                    | GO:0042440 | P | 99   | 2.32E-04 | 3.39E-03 |
| 11 | 5148 | F3 vs. S3 | + | Metabolism | Metabolism | polyamine biosynthetic process                               | GO:0006596 | P | 11   | 3.87E-03 | 3.43E-02 |
| 11 | 5149 | F3 vs. S3 | + | Metabolism | Metabolism | polygalacturonate 4-alpha-galacturonosyltransferase activity | GO:0047262 | F | 17   | 1.44E-03 | 2.48E-02 |
| 11 | 5150 | F3 vs. S3 | + | Metabolism | Metabolism | poly-pyrimidine tract binding                                | GO:0008187 | F | 25   | 7.05E-05 | 1.98E-03 |
| 11 | 5151 | F3 vs. S3 | + | Metabolism | Metabolism | primary alcohol metabolic process                            | GO:0034308 | P | 7    | 4.77E-03 | 4.06E-02 |
| 11 | 5152 | F3 vs. S3 | + | Metabolism | Metabolism | proton export across plasma membrane                         | GO:0120029 | P | 8    | 2.68E-05 | 5.08E-04 |
| 11 | 5153 | F3 vs. S3 | + | Metabolism | Metabolism | purine nucleoside bisphosphate metabolic process             | GO:0034032 | P | 50   | 2.43E-03 | 2.40E-02 |
| 11 | 5154 | F3 vs. S3 | + | Metabolism | Metabolism | purine nucleotide metabolic process                          | GO:0006163 | P | 149  | 1.21E-04 | 1.92E-03 |
| 11 | 5155 | F3 vs. S3 | + | Metabolism | Metabolism | purine ribonucleotide metabolic process                      | GO:0009150 | P | 139  | 1.92E-04 | 2.90E-03 |
| 11 | 5156 | F3 vs. S3 | + | Metabolism | Metabolism | purine-containing compound metabolic process                 | GO:0072521 | P | 160  | 7.73E-05 | 1.30E-03 |
| 11 | 5157 | F3 vs. S3 | + | Metabolism | Metabolism | pyridoxal phosphate binding                                  | GO:0030170 | F | 70   | 1.03E-06 | 4.39E-05 |
| 11 | 5158 | F3 vs. S3 | + | Metabolism | Metabolism | quercetin 3-O-glucosyltransferase activity                   | GO:0080043 | F | 46   | 7.82E-10 | 6.13E-08 |
| 11 | 5159 | F3 vs. S3 | + | Metabolism | Metabolism | quercetin 7-O-glucosyltransferase activity                   | GO:0080044 | F | 41   | 1.98E-09 | 1.51E-07 |
| 11 | 5160 | F3 vs. S3 | + | Metabolism | Metabolism | secondary alcohol metabolic process                          | GO:1902652 | P | 10   | 8.70E-05 | 1.43E-03 |
| 11 | 5161 | F3 vs. S3 | + | Metabolism | Metabolism | secondary metabolic process                                  | GO:0019748 | P | 197  | 1.43E-09 | 7.79E-08 |

|    |      |           |   |            |                |                                                                                                                      |            |   |      |          |          |
|----|------|-----------|---|------------|----------------|----------------------------------------------------------------------------------------------------------------------|------------|---|------|----------|----------|
| 11 | 5162 | F3 vs. S3 | + | Metabolism | Metabolism     | secondary metabolite biosynthetic process                                                                            | GO:0044550 | P | 105  | 1.12E-09 | 6.16E-08 |
| 11 | 5163 | F3 vs. S3 | + | Metabolism | Metabolism     | serine family amino acid biosynthetic process                                                                        | GO:0009070 | P | 30   | 1.75E-05 | 3.57E-04 |
| 11 | 5164 | F3 vs. S3 | + | Metabolism | Metabolism     | serine family amino acid metabolic process                                                                           | GO:0009069 | P | 40   | 1.04E-06 | 3.20E-05 |
| 11 | 5165 | F3 vs. S3 | + | Metabolism | Metabolism     | S-glycoside biosynthetic process                                                                                     | GO:0016144 | P | 29   | 5.67E-06 | 1.41E-04 |
| 11 | 5166 | F3 vs. S3 | + | Metabolism | Metabolism     | small molecule binding                                                                                               | GO:0036094 | F | 850  | 4.24E-06 | 1.54E-04 |
| 11 | 5167 | F3 vs. S3 | + | Metabolism | Metabolism     | small molecule biosynthetic process                                                                                  | GO:0044283 | P | 458  | 0.00E+00 | 0.00E+00 |
| 11 | 5168 | F3 vs. S3 | + | Metabolism | Metabolism     | small molecule metabolic process                                                                                     | GO:0044281 | P | 1055 | 0.00E+00 | 0.00E+00 |
| 11 | 5169 | F3 vs. S3 | + | Metabolism | Metabolism     | sulfur amino acid metabolic process                                                                                  | GO:0000096 | P | 35   | 2.39E-04 | 3.48E-03 |
| 11 | 5170 | F3 vs. S3 | + | Metabolism | Metabolism     | sulfur compound biosynthetic process                                                                                 | GO:0044272 | P | 104  | 2.92E-13 | 2.98E-11 |
| 11 | 5171 | F3 vs. S3 | + | Metabolism | Metabolism     | sulfur compound metabolic process                                                                                    | GO:0006790 | P | 244  | 1.61E-12 | 1.41E-10 |
| 11 | 5172 | F3 vs. S3 | + | Metabolism | Metabolism     | terpenoid metabolic process                                                                                          | GO:0006721 | P | 101  | 3.99E-03 | 3.53E-02 |
| 11 | 5173 | F3 vs. S3 | + | Metabolism | Metabolism     | tetrapyrrole binding                                                                                                 | GO:0046906 | F | 219  | 1.50E-07 | 8.55E-06 |
| 11 | 5174 | F3 vs. S3 | + | Metabolism | Metabolism     | tetrapyrrole metabolic process                                                                                       | GO:0033013 | P | 59   | 4.11E-03 | 3.60E-02 |
| 11 | 5175 | F3 vs. S3 | + | Metabolism | Metabolism     | thioester metabolic process                                                                                          | GO:0035383 | P | 36   | 1.62E-03 | 1.73E-02 |
| 11 | 5176 | F3 vs. S3 | + | Metabolism | Metabolism     | transaminase activity                                                                                                | GO:0008483 | F | 39   | 1.26E-03 | 2.22E-02 |
| 11 | 5177 | F3 vs. S3 | + | Metabolism | Metabolism     | transferase activity                                                                                                 | GO:0016740 | F | 2083 | 3.41E-12 | 3.80E-10 |
| 11 | 5178 | F3 vs. S3 | + | Metabolism | Metabolism     | transferase activity, transferring acyl groups                                                                       | GO:0016746 | F | 248  | 8.77E-05 | 2.33E-03 |
|    |      |           |   |            |                | transferase activity, transferring acyl groups other than amino-acyl groups                                          |            |   |      |          |          |
| 11 | 5179 | F3 vs. S3 | + | Metabolism | Metabolism     | transferase activity, transferring acyl groups, acyl groups                                                          | GO:0016747 | F | 221  | 1.65E-03 | 2.77E-02 |
|    |      |           |   |            |                | converted into alkyl on transfer                                                                                     |            |   |      |          |          |
| 11 | 5180 | F3 vs. S3 | + | Metabolism | Metabolism     | transferase activity, transferring alkyl or aryl (other than methyl) groups                                          | GO:0046912 | F | 15   | 1.75E-03 | 2.89E-02 |
|    |      |           |   |            |                |                                                                                                                      |            |   |      |          |          |
| 11 | 5181 | F3 vs. S3 | + | Metabolism | Metabolism     | transferase activity, transferring glycosyl groups                                                                   | GO:0016765 | F | 88   | 1.74E-06 | 7.23E-05 |
| 11 | 5182 | F3 vs. S3 | + | Metabolism | Metabolism     | transferase activity, transferring hexosyl groups                                                                    | GO:0016757 | F | 389  | 1.27E-11 | 1.18E-09 |
| 11 | 5183 | F3 vs. S3 | + | Metabolism | Metabolism     | transferase activity, transferring nitrogenous groups                                                                | GO:0016758 | F | 247  | 3.37E-12 | 3.91E-10 |
| 11 | 5184 | F3 vs. S3 | + | Metabolism | Metabolism     | transition metal ion binding                                                                                         | GO:0016769 | F | 40   | 7.17E-04 | 1.35E-02 |
| 11 | 5185 | F3 vs. S3 | + | Metabolism | Metabolism     | tyrosine metabolic process                                                                                           | GO:0046914 | F | 740  | 4.92E-07 | 2.38E-05 |
| 11 | 5186 | F3 vs. S3 | + | Metabolism | Metabolism     | UDP-arabinose 4-epimerase activity                                                                                   | GO:0006570 | P | 11   | 1.71E-03 | 1.80E-02 |
| 11 | 5187 | F3 vs. S3 | + | Metabolism | Metabolism     | UDP-glucose 4-epimerase activity                                                                                     | GO:0050373 | F | 6    | 3.32E-04 | 7.14E-03 |
| 11 | 5188 | F3 vs. S3 | + | Metabolism | Metabolism     | UDP-glucosyltransferase activity                                                                                     | GO:0003978 | F | 9    | 1.12E-04 | 2.94E-03 |
| 11 | 5189 | F3 vs. S3 | + | Metabolism | Metabolism     | UDP-glycosyltransferase activity                                                                                     | GO:0035251 | F | 105  | 4.13E-13 | 6.66E-11 |
| 11 | 5190 | F3 vs. S3 | + | Metabolism | Metabolism     | UDP-L-arabinose biosynthetic process                                                                                 | GO:0008194 | F | 190  | 3.33E-16 | 9.66E-14 |
| 11 | 5191 | F3 vs. S3 | + | Metabolism | Metabolism     | UDP-L-arabinose metabolic process                                                                                    | GO:0033358 | P | 6    | 3.32E-04 | 4.73E-03 |
| 11 | 5192 | F3 vs. S3 | + | Metabolism | Metabolism     | vitamin B6 binding                                                                                                   | GO:0033356 | P | 11   | 9.62E-06 | 2.18E-04 |
| 11 | 5193 | F3 vs. S3 | + | Metabolism | Metabolism     | vitamin binding                                                                                                      | GO:0070279 | F | 70   | 1.03E-06 | 4.45E-05 |
| 11 | 5194 | F3 vs. S3 | + | Metabolism | Metabolism     | xyloglucan metabolic process                                                                                         | GO:0019842 | F | 90   | 3.06E-05 | 9.64E-04 |
| 11 | 5195 | F3 vs. S3 | + | Metabolism | Metabolism     | xyloglucan:xyloglucosyl transferase activity                                                                         | GO:0010411 | P | 43   | 1.11E-03 | 1.29E-02 |
| 11 | 5196 | F3 vs. S3 | + | Metabolism | Metabolism     | carbon fixation                                                                                                      | GO:0016762 | F | 25   | 3.09E-03 | 4.77E-02 |
| 11 | 5197 | F3 vs. S3 | + | Metabolism | Photosynthesis | chlorophyll binding                                                                                                  | GO:0015977 | P | 15   | 1.56E-06 | 4.52E-05 |
| 11 | 5198 | F3 vs. S3 | + | Metabolism | Photosynthesis | chlorophyll metabolic process                                                                                        | GO:0016168 | F | 21   | 1.54E-05 | 5.27E-04 |
| 11 | 5199 | F3 vs. S3 | + | Metabolism | Photosynthesis | chloroplast                                                                                                          | GO:0015994 | P | 48   | 2.37E-03 | 2.35E-02 |
| 11 | 5200 | F3 vs. S3 | + | Metabolism | Photosynthesis | chloroplast envelope                                                                                                 | GO:0009507 | C | 3158 | 0.00E+00 | 0.00E+00 |
| 11 | 5201 | F3 vs. S3 | + | Metabolism | Photosynthesis | chloroplast stroma                                                                                                   | GO:0009941 | C | 470  | 4.38E-13 | 1.24E-11 |
| 11 | 5202 | F3 vs. S3 | + | Metabolism | Photosynthesis | chloroplast thylakoid                                                                                                | GO:0009570 | C | 537  | 0.00E+00 | 0.00E+00 |
| 11 | 5203 | F3 vs. S3 | + | Metabolism | Photosynthesis | chloroplast thylakoid membrane                                                                                       | GO:0009534 | C | 313  | 0.00E+00 | 0.00E+00 |
| 11 | 5204 | F3 vs. S3 | + | Metabolism | Photosynthesis | electron transporter, transferring electrons within the cyclic electron transport pathway of photosynthesis activity | GO:0009535 | C | 252  | 0.00E+00 | 0.00E+00 |
|    |      |           |   |            |                |                                                                                                                      |            |   |      |          |          |
| 11 | 5205 | F3 vs. S3 | + | Metabolism | Photosynthesis | energy quenching                                                                                                     | GO:0045156 | F | 8    | 5.33E-04 | 1.07E-02 |
| 11 | 5206 | F3 vs. S3 | + | Metabolism | Photosynthesis | fructose 1,6-bisphosphate metabolic process                                                                          | GO:1990066 | P | 11   | 5.78E-03 | 4.74E-02 |
| 11 | 5207 | F3 vs. S3 | + | Metabolism | Photosynthesis | fructose-bisphosphate aldolase activity                                                                              | GO:0030388 | P | 12   | 1.46E-04 | 2.27E-03 |
| 11 | 5208 | F3 vs. S3 | + | Metabolism | Photosynthesis | negative regulation of photosynthesis                                                                                | GO:0004332 | F | 8    | 7.44E-04 | 1.39E-02 |
| 11 | 5209 | F3 vs. S3 | + | Metabolism | Photosynthesis | oxidative photosynthetic carbon pathway                                                                              | GO:1905156 | P | 12   | 5.92E-03 | 4.83E-02 |
| 11 | 5210 | F3 vs. S3 | + | Metabolism | Photosynthesis | photosynthesis                                                                                                       | GO:0009854 | P | 5    | 3.56E-04 | 4.92E-03 |
| 11 | 5211 | F3 vs. S3 | + | Metabolism | Photosynthesis | photosynthesis, dark reaction                                                                                        | GO:0015979 | P | 141  | 1.57E-12 | 1.40E-10 |
| 11 | 5212 | F3 vs. S3 | + | Metabolism | Photosynthesis | photosynthesis, light harvesting                                                                                     | GO:0019685 | P | 15   | 1.30E-06 | 3.89E-05 |
| 11 | 5213 | F3 vs. S3 | + | Metabolism | Photosynthesis | photosynthesis, light harvesting in photosystem I                                                                    | GO:0009765 | P | 32   | 4.89E-04 | 6.45E-03 |
| 11 | 5214 | F3 vs. S3 | + | Metabolism | Photosynthesis | photosynthesis, light reaction                                                                                       | GO:0009768 | P | 18   | 1.29E-03 | 1.47E-02 |
| 11 | 5215 | F3 vs. S3 | + | Metabolism | Photosynthesis | photosynthetic electron transport chain                                                                              | GO:0019684 | P | 92   | 8.91E-09 | 4.06E-07 |
| 11 | 5216 | F3 vs. S3 | + | Metabolism | Photosynthesis | photosynthetic membrane                                                                                              | GO:0009767 | P | 33   | 3.56E-04 | 4.91E-03 |
| 11 | 5217 | F3 vs. S3 | + | Metabolism | Photosynthesis | photosystem                                                                                                          | GO:0034357 | C | 278  | 1.11E-16 | 4.24E-15 |
| 11 | 5218 | F3 vs. S3 | + | Metabolism | Photosynthesis | photosystem II                                                                                                       | GO:0009521 | C | 42   | 4.31E-04 | 3.31E-03 |
| 11 | 5219 | F3 vs. S3 | + | Metabolism | Photosynthesis | plastid                                                                                                              | GO:0009523 | C | 29   | 6.25E-04 | 4.63E-03 |
| 11 | 5220 | F3 vs. S3 | + | Metabolism | Photosynthesis | plastid envelope                                                                                                     | GO:0009536 | C | 3456 | 3.22E-14 | 1.03E-12 |
| 11 | 5221 | F3 vs. S3 | + | Metabolism | Photosynthesis |                                                                                                                      | GO:0009526 | C | 490  | 5.47E-14 | 1.70E-12 |



|    |      |           |   |            |                |                                                                   |            |   |     |          |          |
|----|------|-----------|---|------------|----------------|-------------------------------------------------------------------|------------|---|-----|----------|----------|
| 11 | 5222 | F3 vs. S3 | + | Metabolism | Photosynthesis | plastid membrane organization                                     | GO:0009668 | P | 36  | 3.92E-03 | 3.47E-02 |
| 11 | 5223 | F3 vs. S3 | + | Metabolism | Photosynthesis | plastid stroma                                                    | GO:0009532 | C | 545 | 0.00E+00 | 0.00E+00 |
| 11 | 5224 | F3 vs. S3 | + | Metabolism | Photosynthesis | plastid thylakoid                                                 | GO:0031976 | C | 315 | 0.00E+00 | 0.00E+00 |
| 11 | 5225 | F3 vs. S3 | + | Metabolism | Photosynthesis | plastid thylakoid membrane                                        | GO:0055035 | C | 255 | 0.00E+00 | 0.00E+00 |
| 11 | 5226 | F3 vs. S3 | + | Metabolism | Photosynthesis | plastoglobule                                                     | GO:0010287 | C | 55  | 1.05E-10 | 2.41E-09 |
| 11 | 5227 | F3 vs. S3 | + | Metabolism | Photosynthesis | regulation of photosynthesis                                      | GO:0010109 | P | 32  | 7.46E-05 | 1.26E-03 |
| 11 | 5228 | F3 vs. S3 | + | Metabolism | Photosynthesis | regulation of photosynthesis, light reaction                      | GO:0042548 | P | 17  | 1.33E-03 | 1.49E-02 |
| 11 | 5229 | F3 vs. S3 | + | Metabolism | Photosynthesis | terpenoid biosynthetic process                                    | GO:0016114 | P | 82  | 3.40E-03 | 3.07E-02 |
| 11 | 5230 | F3 vs. S3 | + | Metabolism | Photosynthesis | thylakoid                                                         | GO:0009579 | C | 383 | 0.00E+00 | 0.00E+00 |
| 11 | 5231 | F3 vs. S3 | + | Metabolism | Photosynthesis | thylakoid lumen                                                   | GO:0031977 | C | 44  | 5.07E-05 | 5.35E-04 |
| 11 | 5232 | F3 vs. S3 | + | Metabolism | Photosynthesis | thylakoid membrane                                                | GO:0042651 | C | 275 | 0.00E+00 | 0.00E+00 |
| 11 | 5233 | F3 vs. S3 | + | Metabolism | Photosynthesis | thylakoid membrane organization                                   | GO:0010027 | P | 34  | 4.32E-03 | 3.75E-02 |
| 11 | 5234 | F3 vs. S3 | + | Metabolism | Transporters   | active ion transmembrane transporter activity                     | GO:0022853 | F | 160 | 5.49E-13 | 7.58E-11 |
| 11 | 5235 | F3 vs. S3 | + | Metabolism | Transporters   | active transmembrane transporter activity                         | GO:0022804 | F | 350 | 0.00E+00 | 0.00E+00 |
| 11 | 5236 | F3 vs. S3 | + | Metabolism | Transporters   | amino acid transmembrane transport                                | GO:0003333 | P | 19  | 4.43E-05 | 7.97E-04 |
| 11 | 5237 | F3 vs. S3 | + | Metabolism | Transporters   | amino acid transmembrane transporter activity                     | GO:0015171 | F | 62  | 3.57E-07 | 1.79E-05 |
| 11 | 5238 | F3 vs. S3 | + | Metabolism | Transporters   | amino acid transport                                              | GO:0006865 | P | 37  | 5.04E-06 | 1.27E-04 |
| 11 | 5239 | F3 vs. S3 | + | Metabolism | Transporters   | anion transmembrane transporter activity                          | GO:0008509 | F | 255 | 5.56E-08 | 3.43E-06 |
| 11 | 5240 | F3 vs. S3 | + | Metabolism | Transporters   | anion transport                                                   | GO:0006820 | P | 193 | 1.15E-05 | 2.53E-04 |
| 11 | 5241 | F3 vs. S3 | + | Metabolism | Transporters   | antiporter activity                                               | GO:0015297 | F | 144 | 1.07E-10 | 9.36E-09 |
| 11 | 5242 | F3 vs. S3 | + | Metabolism | Transporters   | ATPase-coupled cation transmembrane transporter activity          | GO:0019829 | F | 46  | 6.70E-07 | 3.09E-05 |
| 11 | 5243 | F3 vs. S3 | + | Metabolism | Transporters   | ATPase-coupled ion transmembrane transporter activity             | GO:0042625 | F | 58  | 3.69E-06 | 1.39E-04 |
| 11 | 5244 | F3 vs. S3 | + | Metabolism | Transporters   | ATPase-coupled transmembrane transporter activity                 | GO:0042626 | F | 140 | 2.86E-07 | 1.46E-05 |
| 11 | 5245 | F3 vs. S3 | + | Metabolism | Transporters   | calcium ion transmembrane transport                               | GO:0070588 | P | 24  | 2.04E-03 | 2.09E-02 |
| 11 | 5246 | F3 vs. S3 | + | Metabolism | Transporters   | calcium ion transport                                             | GO:0006816 | P | 41  | 4.44E-03 | 3.83E-02 |
| 11 | 5247 | F3 vs. S3 | + | Metabolism | Transporters   | carbohydrate transmembrane transport                              | GO:0034219 | P | 25  | 2.93E-03 | 2.73E-02 |
| 11 | 5248 | F3 vs. S3 | + | Metabolism | Transporters   | carbohydrate transmembrane transporter activity                   | GO:0015144 | F | 79  | 7.88E-08 | 4.66E-06 |
| 11 | 5249 | F3 vs. S3 | + | Metabolism | Transporters   | carbohydrate transport                                            | GO:0008643 | P | 51  | 1.50E-04 | 2.31E-03 |
| 11 | 5250 | F3 vs. S3 | + | Metabolism | Transporters   | carboxylic acid transmembrane transport                           | GO:1905039 | P | 40  | 4.24E-03 | 3.69E-02 |
| 11 | 5251 | F3 vs. S3 | + | Metabolism | Transporters   | carboxylic acid transmembrane transporter activity                | GO:0046943 | F | 99  | 1.20E-08 | 8.48E-07 |
| 11 | 5252 | F3 vs. S3 | + | Metabolism | Transporters   | carboxylic acid transport                                         | GO:0046942 | P | 82  | 3.00E-05 | 5.57E-04 |
| 11 | 5253 | F3 vs. S3 | + | Metabolism | Transporters   | cation transmembrane transport                                    | GO:0098655 | P | 149 | 5.05E-10 | 2.98E-08 |
| 11 | 5254 | F3 vs. S3 | + | Metabolism | Transporters   | cation transmembrane transporter activity                         | GO:0008324 | F | 289 | 4.60E-13 | 7.01E-11 |
| 11 | 5255 | F3 vs. S3 | + | Metabolism | Transporters   | cation transport                                                  | GO:0006812 | P | 254 | 1.22E-11 | 9.78E-10 |
| 11 | 5256 | F3 vs. S3 | + | Metabolism | Transporters   | cation:cation antiporter activity                                 | GO:0015491 | F | 41  | 5.72E-05 | 1.66E-03 |
| 11 | 5257 | F3 vs. S3 | + | Metabolism | Transporters   | cytoplasmic vesicle                                               | GO:0031410 | C | 501 | 1.73E-03 | 1.12E-02 |
| 11 | 5258 | F3 vs. S3 | + | Metabolism | Transporters   | disaccharide transport                                            | GO:0015766 | P | 19  | 2.50E-03 | 2.43E-02 |
| 11 | 5259 | F3 vs. S3 | + | Metabolism | Transporters   | divalent inorganic cation transmembrane transporter activity      | GO:0072509 | F | 61  | 1.81E-03 | 2.95E-02 |
| 11 | 5260 | F3 vs. S3 | + | Metabolism | Transporters   | divalent inorganic cation transport                               | GO:0072511 | P | 78  | 6.74E-04 | 8.48E-03 |
| 11 | 5261 | F3 vs. S3 | + | Metabolism | Transporters   | divalent metal ion transport                                      | GO:0070838 | P | 76  | 7.85E-04 | 9.57E-03 |
| 11 | 5262 | F3 vs. S3 | + | Metabolism | Transporters   | endosome                                                          | GO:0005768 | C | 287 | 1.63E-03 | 1.07E-02 |
| 11 | 5263 | F3 vs. S3 | + | Metabolism | Transporters   | export across plasma membrane                                     | GO:0140115 | P | 12  | 2.21E-05 | 4.30E-04 |
| 11 | 5264 | F3 vs. S3 | + | Metabolism | Transporters   | export from cell                                                  | GO:0140352 | P | 64  | 8.46E-06 | 1.98E-04 |
| 11 | 5265 | F3 vs. S3 | + | Metabolism | Transporters   | inorganic anion transport                                         | GO:0015698 | P | 70  | 3.34E-03 | 3.03E-02 |
| 11 | 5266 | F3 vs. S3 | + | Metabolism | Transporters   | inorganic cation transmembrane transport                          | GO:0098662 | P | 143 | 1.96E-10 | 1.27E-08 |
| 11 | 5267 | F3 vs. S3 | + | Metabolism | Transporters   | inorganic cation transmembrane transporter activity               | GO:0022890 | F | 261 | 4.46E-12 | 4.62E-10 |
| 11 | 5268 | F3 vs. S3 | + | Metabolism | Transporters   | inorganic ion transmembrane transport                             | GO:0098660 | P | 160 | 4.09E-10 | 2.44E-08 |
| 11 | 5269 | F3 vs. S3 | + | Metabolism | Transporters   | inorganic molecular entity transmembrane transporter activity     | GO:0015318 | F | 472 | 0.00E+00 | 0.00E+00 |
| 11 | 5270 | F3 vs. S3 | + | Metabolism | Transporters   | ion transmembrane transport                                       | GO:0034220 | P | 221 | 1.23E-10 | 8.33E-09 |
| 11 | 5271 | F3 vs. S3 | + | Metabolism | Transporters   | ion transmembrane transporter activity                            | GO:0015075 | F | 512 | 8.88E-16 | 2.34E-13 |
|    |      |           |   |            |                | ion transmembrane transporter activity, phosphorylative mechanism | GO:0015662 | F | 35  | 1.39E-03 | 2.41E-02 |
| 11 | 5272 | F3 vs. S3 | + | Metabolism | Transporters   | ion transport                                                     | GO:0006811 | P | 430 | 2.95E-14 | 3.31E-12 |
| 11 | 5273 | F3 vs. S3 | + | Metabolism | Transporters   | L-alpha-amino acid transmembrane transport                        | GO:1902475 | P | 5   | 5.24E-03 | 4.38E-02 |
| 11 | 5274 | F3 vs. S3 | + | Metabolism | Transporters   | L-amino acid transmembrane transporter activity                   | GO:0015179 | F | 17  | 3.06E-03 | 4.74E-02 |
| 11 | 5275 | F3 vs. S3 | + | Metabolism | Transporters   | metal ion transmembrane transporter activity                      | GO:0046873 | F | 157 | 4.30E-06 | 1.52E-04 |
| 11 | 5276 | F3 vs. S3 | + | Metabolism | Transporters   | metal ion transport                                               | GO:0030001 | P | 158 | 5.12E-05 | 9.08E-04 |
| 11 | 5277 | F3 vs. S3 | + | Metabolism | Transporters   | monosaccharide transmembrane transport                            | GO:0015749 | P | 14  | 5.88E-03 | 4.80E-02 |
| 11 | 5278 | F3 vs. S3 | + | Metabolism | Transporters   |                                                                   |            |   |     |          |          |
| 11 | 5279 | F3 vs. S3 | + | Metabolism | Transporters   | monovalent inorganic cation transmembrane transporter activity    | GO:0015077 | F | 148 | 3.09E-12 | 3.74E-10 |
| 11 | 5280 | F3 vs. S3 | + | Metabolism | Transporters   | monovalent inorganic cation transport                             | GO:0015672 | P | 104 | 2.52E-11 | 1.81E-09 |
| 11 | 5281 | F3 vs. S3 | + | Metabolism | Transporters   | neutral amino acid transmembrane transporter activity             | GO:0015175 | F | 15  | 1.48E-04 | 3.81E-03 |
| 11 | 5282 | F3 vs. S3 | + | Metabolism | Transporters   | neutral amino acid transport                                      | GO:0015804 | P | 9   | 2.64E-03 | 2.54E-02 |
| 11 | 5283 | F3 vs. S3 | + | Metabolism | Transporters   | organic acid transmembrane transporter activity                   | GO:0005342 | F | 99  | 1.20E-08 | 8.27E-07 |

|    |      |           |   |                        |                      |                                                              |            |   |      |          |          |
|----|------|-----------|---|------------------------|----------------------|--------------------------------------------------------------|------------|---|------|----------|----------|
| 11 | 5284 | F3 vs. S3 | + | Metabolism             | Transporters         | organic acid transport                                       | GO:0015849 | P | 84   | 5.88E-05 | 1.03E-03 |
| 11 | 5285 | F3 vs. S3 | + | Metabolism             | Transporters         | organic anion transmembrane transporter activity             | GO:0008514 | F | 160  | 2.74E-07 | 1.42E-05 |
| 11 | 5286 | F3 vs. S3 | + | Metabolism             | Transporters         | organic anion transport                                      | GO:0015711 | P | 119  | 1.00E-04 | 1.62E-03 |
| 11 | 5287 | F3 vs. S3 | + | Metabolism             | Transporters         | primary active transmembrane transporter activity            | GO:0015399 | F | 159  | 2.85E-06 | 1.10E-04 |
| 11 | 5288 | F3 vs. S3 | + | Metabolism             | Transporters         | proton transmembrane transporter activity                    | GO:0015078 | F | 116  | 5.78E-12 | 5.78E-10 |
| 11 | 5289 | F3 vs. S3 | + | Metabolism             | Transporters         | secondary active transmembrane transporter activity          | GO:0015291 | F | 189  | 1.11E-13 | 2.02E-11 |
| 11 | 5290 | F3 vs. S3 | + | Metabolism             | Transporters         | solute:cation antiporter activity                            | GO:0015298 | F | 43   | 2.21E-04 | 5.12E-03 |
| 11 | 5291 | F3 vs. S3 | + | Metabolism             | Transporters         | solute:cation symporter activity                             | GO:0015294 | F | 25   | 4.00E-04 | 8.53E-03 |
| 11 | 5292 | F3 vs. S3 | + | Metabolism             | Transporters         | solute:proton antiporter activity                            | GO:0015299 | F | 36   | 2.55E-04 | 5.77E-03 |
| 11 | 5293 | F3 vs. S3 | + | Metabolism             | Transporters         | solute:proton symporter activity                             | GO:0015295 | F | 22   | 2.16E-04 | 5.05E-03 |
| 11 | 5294 | F3 vs. S3 | + | Metabolism             | Transporters         | sucrose transmembrane transporter activity                   | GO:0008515 | F | 17   | 2.68E-03 | 4.18E-02 |
| 11 | 5295 | F3 vs. S3 | + | Metabolism             | Transporters         | sucrose transport                                            | GO:0015770 | P | 19   | 2.50E-03 | 2.43E-02 |
| 11 | 5296 | F3 vs. S3 | + | Metabolism             | Transporters         | sugar transmembrane transporter activity                     | GO:0051119 | F | 34   | 6.92E-04 | 1.31E-02 |
| 11 | 5297 | F3 vs. S3 | + | Metabolism             | Transporters         | symporter activity                                           | GO:0015293 | F | 25   | 4.00E-04 | 8.47E-03 |
| 11 | 5298 | F3 vs. S3 | + | Metabolism             | Transporters         | trans-Golgi network                                          | GO:0005802 | C | 219  | 5.55E-06 | 6.88E-05 |
| 11 | 5299 | F3 vs. S3 | + | Metabolism             | Transporters         | transition metal ion transport                               | GO:0000041 | P | 51   | 4.15E-03 | 3.63E-02 |
| 11 | 5300 | F3 vs. S3 | + | Metabolism             | Transporters         | transmembrane transport                                      | GO:0055085 | P | 574  | 0.00E+00 | 0.00E+00 |
| 11 | 5301 | F3 vs. S3 | + | Metabolism             | Transporters         | transmembrane transporter activity                           | GO:0022857 | F | 852  | 0.00E+00 | 0.00E+00 |
| 11 | 5302 | F3 vs. S3 | + | Metabolism             | Transporters         | transport                                                    | GO:0006810 | P | 1482 | 2.53E-06 | 6.82E-05 |
| 11 | 5303 | F3 vs. S3 | + | Metabolism             | Transporters         | transporter activity                                         | GO:0005215 | F | 880  | 0.00E+00 | 0.00E+00 |
| 11 | 5304 | F3 vs. S3 | + | Metabolism             | Transporters         | vesicle                                                      | GO:0031982 | C | 544  | 7.87E-04 | 5.74E-03 |
| 11 | 5305 | F3 vs. S3 | + | Metabolism             | Transporters         | xenobiotic transmembrane transporter activity                | GO:0042910 | F | 47   | 2.51E-06 | 1.01E-04 |
| 11 | 5306 | F3 vs. S3 | + | Regulation             | Protein modification | Golgi apparatus                                              | GO:0005794 | C | 812  | 1.15E-08 | 2.32E-07 |
| 11 | 5307 | F3 vs. S3 | + | Regulation             | Regulation           | regulation of biological quality                             | GO:0065008 | P | 632  | 2.50E-03 | 2.44E-02 |
| 11 | 5308 | F3 vs. S3 | + | Regulation             | Regulation           | regulation of cell morphogenesis involved in differentiation | GO:0010769 | P | 32   | 1.19E-07 | 4.37E-06 |
| 11 | 5309 | F3 vs. S3 | + | Regulation             | Regulation           | regulation of pollen tube growth                             | GO:0080092 | P | 29   | 4.86E-08 | 1.85E-06 |
| 11 | 5310 | F3 vs. S3 | + | Regulation             | Regulation           | regulation of unidimensional cell growth                     | GO:0051510 | P | 57   | 1.52E-03 | 1.64E-02 |
| 11 | 5311 | F3 vs. S3 | + | Regulation             | Translation          | poly(U) RNA binding                                          | GO:0008266 | F | 22   | 7.14E-05 | 1.99E-03 |
| 11 | 5312 | F3 vs. S3 | + | Signaling and response | Signaling            | calcium ion binding                                          | GO:0005509 | F | 155  | 6.60E-06 | 2.28E-04 |
| 11 | 5313 | F3 vs. S3 | + | Signaling and response | Signaling            | cellular response to external stimulus                       | GO:0071496 | P | 144  | 3.24E-04 | 4.63E-03 |
| 11 | 5314 | F3 vs. S3 | + | Signaling and response | Signaling            | cellular response to extracellular stimulus                  | GO:0031668 | P | 139  | 8.16E-05 | 1.36E-03 |
| 11 | 5315 | F3 vs. S3 | + | Signaling and response | Signaling            | cellular response to nutrient levels                         | GO:0031669 | P | 111  | 1.27E-04 | 2.00E-03 |
| 11 | 5316 | F3 vs. S3 | + | Signaling and response | Signaling            | dephosphorylation                                            | GO:0016311 | P | 128  | 1.13E-04 | 1.80E-03 |
| 11 | 5317 | F3 vs. S3 | + | Signaling and response | Signaling            | jasmonic acid biosynthetic process                           | GO:0009695 | P | 22   | 1.49E-03 | 1.62E-02 |
| 11 | 5318 | F3 vs. S3 | + | Signaling and response | Signaling            | multi-organism process                                       | GO:0051704 | P | 294  | 1.10E-04 | 1.75E-03 |
| 11 | 5319 | F3 vs. S3 | + | Signaling and response | Signaling            | phosphatase activity                                         | GO:0016791 | F | 207  | 2.61E-06 | 1.04E-04 |
| 11 | 5320 | F3 vs. S3 | + | Signaling and response | Signaling            | protein dephosphorylation                                    | GO:0006470 | P | 81   | 9.38E-04 | 1.12E-02 |
| 11 | 5321 | F3 vs. S3 | + | Signaling and response | Signaling            | protein serine/threonine phosphatase activity                | GO:0004722 | F | 73   | 2.25E-03 | 3.54E-02 |
| 11 | 5322 | F3 vs. S3 | + | Signaling and response | Signaling            | response to abiotic stimulus                                 | GO:0009628 | P | 1424 | 1.53E-10 | 1.02E-08 |
| 11 | 5323 | F3 vs. S3 | + | Signaling and response | Signaling            | response to acid chemical                                    | GO:0001101 | P | 276  | 1.50E-04 | 2.31E-03 |
| 11 | 5324 | F3 vs. S3 | + | Signaling and response | Signaling            | response to bacterium                                        | GO:0009617 | P | 335  | 4.21E-07 | 1.40E-05 |
| 11 | 5325 | F3 vs. S3 | + | Signaling and response | Signaling            | response to biotic stimulus                                  | GO:0009607 | P | 733  | 9.67E-09 | 4.31E-07 |
| 11 | 5326 | F3 vs. S3 | + | Signaling and response | Signaling            | response to cadmium ion                                      | GO:0046686 | P | 241  | 5.86E-09 | 2.74E-07 |
| 11 | 5327 | F3 vs. S3 | + | Signaling and response | Signaling            | response to chemical                                         | GO:0042221 | P | 1750 | 4.61E-13 | 4.45E-11 |
| 11 | 5328 | F3 vs. S3 | + | Signaling and response | Signaling            | response to chitin                                           | GO:0010200 | P | 93   | 1.09E-06 | 3.34E-05 |
| 11 | 5329 | F3 vs. S3 | + | Signaling and response | Signaling            | response to endogenous stimulus                              | GO:0009719 | P | 803  | 1.84E-03 | 1.93E-02 |
| 11 | 5330 | F3 vs. S3 | + | Signaling and response | Signaling            | response to external biotic stimulus                         | GO:0043207 | P | 732  | 1.14E-08 | 4.99E-07 |
| 11 | 5331 | F3 vs. S3 | + | Signaling and response | Signaling            | response to external stimulus                                | GO:0009605 | P | 1004 | 3.26E-11 | 2.31E-09 |
| 11 | 5332 | F3 vs. S3 | + | Signaling and response | Signaling            | response to extracellular stimulus                           | GO:0009991 | P | 178  | 2.81E-05 | 5.27E-04 |
| 11 | 5333 | F3 vs. S3 | + | Signaling and response | Signaling            | response to hormone                                          | GO:0009725 | P | 782  | 1.87E-03 | 1.94E-02 |
| 11 | 5334 | F3 vs. S3 | + | Signaling and response | Signaling            | response to inorganic substance                              | GO:0010035 | P | 644  | 1.00E-11 | 8.27E-10 |
| 11 | 5335 | F3 vs. S3 | + | Signaling and response | Signaling            | response to jasmonic acid                                    | GO:0009753 | P | 115  | 1.24E-05 | 2.72E-04 |
| 11 | 5336 | F3 vs. S3 | + | Signaling and response | Signaling            | response to karrikin                                         | GO:0080167 | P | 99   | 2.09E-06 | 5.85E-05 |
| 11 | 5337 | F3 vs. S3 | + | Signaling and response | Signaling            | response to light intensity                                  | GO:0009642 | P | 101  | 1.35E-03 | 1.50E-02 |
| 11 | 5338 | F3 vs. S3 | + | Signaling and response | Signaling            | response to light stimulus                                   | GO:0009416 | P | 491  | 1.29E-06 | 3.88E-05 |
| 11 | 5339 | F3 vs. S3 | + | Signaling and response | Signaling            | response to lipid                                            | GO:0033993 | P | 440  | 5.61E-03 | 4.65E-02 |
| 11 | 5340 | F3 vs. S3 | + | Signaling and response | Signaling            | response to metal ion                                        | GO:0010038 | P | 318  | 2.48E-08 | 1.03E-06 |
| 11 | 5341 | F3 vs. S3 | + | Signaling and response | Signaling            | response to nitrogen compound                                | GO:1901698 | P | 193  | 2.20E-04 | 3.25E-03 |
| 11 | 5342 | F3 vs. S3 | + | Signaling and response | Signaling            | response to nutrient levels                                  | GO:0031667 | P | 149  | 6.09E-05 | 1.06E-03 |
| 11 | 5343 | F3 vs. S3 | + | Signaling and response | Signaling            | response to organic substance                                | GO:0010033 | P | 1087 | 1.82E-05 | 3.69E-04 |
| 11 | 5344 | F3 vs. S3 | + | Signaling and response | Signaling            | response to organonitrogen compound                          | GO:0010243 | P | 162  | 5.09E-04 | 6.65E-03 |
| 11 | 5345 | F3 vs. S3 | + | Signaling and response | Signaling            | response to oxygen-containing compound                       | GO:1901700 | P | 1021 | 2.00E-10 | 1.27E-08 |
| 11 | 5346 | F3 vs. S3 | + | Signaling and response | Signaling            | response to stimulus                                         | GO:0050896 | P | 3525 | 4.14E-09 | 2.06E-07 |
| 11 | 5347 | F3 vs. S3 | + | Signaling and response | Signaling            | response to temperature stimulus                             | GO:0009266 | P | 411  | 3.35E-08 | 1.34E-06 |

|    |      |           |   |                        |               |                                             |            |   |      |          |          |
|----|------|-----------|---|------------------------|---------------|---------------------------------------------|------------|---|------|----------|----------|
| 11 | 5348 | F3 vs. S3 | + | Signaling and response | Signaling     | response to water                           | GO:0009415 | P | 259  | 7.17E-05 | 1.23E-03 |
| 11 | 5349 | F3 vs. S3 | + | Signaling and response | Stress        | aging                                       | GO:0007568 | P | 92   | 7.02E-04 | 8.69E-03 |
| 11 | 5350 | F3 vs. S3 | + | Signaling and response | Stress        | cation homeostasis                          | GO:0055080 | P | 151  | 4.68E-05 | 8.34E-04 |
| 11 | 5351 | F3 vs. S3 | + | Signaling and response | Stress        | cellular cation homeostasis                 | GO:0030003 | P | 107  | 5.00E-03 | 4.20E-02 |
| 11 | 5352 | F3 vs. S3 | + | Signaling and response | Stress        | cellular detoxification                     | GO:1990748 | P | 30   | 3.12E-03 | 2.86E-02 |
| 11 | 5353 | F3 vs. S3 | + | Signaling and response | Stress        | cellular homeostasis                        | GO:0019725 | P | 186  | 6.02E-03 | 4.90E-02 |
| 11 | 5354 | F3 vs. S3 | + | Signaling and response | Stress        | cellular ion homeostasis                    | GO:0006873 | P | 112  | 3.37E-03 | 3.04E-02 |
| 11 | 5355 | F3 vs. S3 | + | Signaling and response | Stress        | cellular oxidant detoxification             | GO:0098869 | P | 19   | 3.47E-03 | 3.12E-02 |
| 11 | 5356 | F3 vs. S3 | + | Signaling and response | Stress        | cellular response to phosphate starvation   | GO:0016036 | P | 55   | 1.19E-03 | 1.36E-02 |
| 11 | 5357 | F3 vs. S3 | + | Signaling and response | Stress        | cellular response to starvation             | GO:0009267 | P | 101  | 6.89E-04 | 8.57E-03 |
| 11 | 5358 | F3 vs. S3 | + | Signaling and response | Stress        | cellular response to toxic substance        | GO:0097237 | P | 31   | 2.81E-03 | 2.64E-02 |
| 11 | 5359 | F3 vs. S3 | + | Signaling and response | Stress        | chemical homeostasis                        | GO:0048878 | P | 265  | 3.90E-06 | 1.00E-04 |
| 11 | 5360 | F3 vs. S3 | + | Signaling and response | Stress        | defense response                            | GO:0006952 | P | 611  | 5.63E-06 | 1.40E-04 |
| 11 | 5361 | F3 vs. S3 | + | Signaling and response | Stress        | defense response to bacterium               | GO:0042742 | P | 276  | 9.72E-07 | 3.01E-05 |
| 11 | 5362 | F3 vs. S3 | + | Signaling and response | Stress        | defense response to Gram-negative bacterium | GO:0050829 | P | 18   | 3.08E-03 | 2.84E-02 |
| 11 | 5363 | F3 vs. S3 | + | Signaling and response | Stress        | defense response to other organism          | GO:0098542 | P | 527  | 9.47E-06 | 2.16E-04 |
| 11 | 5364 | F3 vs. S3 | + | Signaling and response | Stress        | detoxification                              | GO:0098754 | P | 65   | 1.20E-07 | 4.38E-06 |
| 11 | 5365 | F3 vs. S3 | + | Signaling and response | Stress        | flavonoid biosynthetic process              | GO:0009813 | P | 32   | 7.91E-05 | 1.32E-03 |
| 11 | 5366 | F3 vs. S3 | + | Signaling and response | Stress        | flavonoid metabolic process                 | GO:0009812 | P | 36   | 1.61E-04 | 2.46E-03 |
| 11 | 5367 | F3 vs. S3 | + | Signaling and response | Stress        | glutathione binding                         | GO:0043295 | F | 14   | 2.00E-03 | 3.22E-02 |
| 11 | 5368 | F3 vs. S3 | + | Signaling and response | Stress        | glutathione metabolic process               | GO:0006749 | P | 28   | 1.22E-03 | 1.39E-02 |
| 11 | 5369 | F3 vs. S3 | + | Signaling and response | Stress        | glutathione transferase activity            | GO:0004364 | F | 35   | 3.31E-04 | 7.17E-03 |
| 11 | 5370 | F3 vs. S3 | + | Signaling and response | Stress        | homeostatic process                         | GO:0042592 | P | 344  | 5.21E-05 | 9.22E-04 |
| 11 | 5371 | F3 vs. S3 | + | Signaling and response | Stress        | inorganic ion homeostasis                   | GO:0098771 | P | 165  | 1.93E-05 | 3.88E-04 |
| 11 | 5372 | F3 vs. S3 | + | Signaling and response | Stress        | interspecies interaction between organisms  | GO:0044419 | P | 745  | 2.06E-08 | 8.77E-07 |
| 11 | 5373 | F3 vs. S3 | + | Signaling and response | Stress        | ion homeostasis                             | GO:0050801 | P | 189  | 9.37E-06 | 2.15E-04 |
| 11 | 5374 | F3 vs. S3 | + | Signaling and response | Stress        | monovalent inorganic cation homeostasis     | GO:0055067 | P | 51   | 4.80E-04 | 6.35E-03 |
| 11 | 5375 | F3 vs. S3 | + | Signaling and response | Stress        | nonphotochemical quenching                  | GO:0010196 | P | 11   | 5.78E-03 | 4.73E-02 |
| 11 | 5376 | F3 vs. S3 | + | Signaling and response | Stress        | reactive oxygen species metabolic process   | GO:0072593 | P | 50   | 1.04E-04 | 1.67E-03 |
| 11 | 5377 | F3 vs. S3 | + | Signaling and response | Stress        | regulation of pH                            | GO:0006885 | P | 35   | 6.01E-06 | 1.46E-04 |
| 11 | 5378 | F3 vs. S3 | + | Signaling and response | Stress        | regulation of stomatal movement             | GO:0010119 | P | 63   | 2.97E-03 | 2.76E-02 |
| 11 | 5379 | F3 vs. S3 | + | Signaling and response | Stress        | response to abscisic acid                   | GO:0009737 | P | 324  | 2.41E-05 | 4.61E-04 |
| 11 | 5380 | F3 vs. S3 | + | Signaling and response | Stress        | response to alcohol                         | GO:0097305 | P | 328  | 7.71E-05 | 1.29E-03 |
| 11 | 5381 | F3 vs. S3 | + | Signaling and response | Stress        | response to cold                            | GO:0009409 | P | 298  | 2.49E-08 | 1.03E-06 |
| 11 | 5382 | F3 vs. S3 | + | Signaling and response | Stress        | response to desiccation                     | GO:0009269 | P | 16   | 1.33E-03 | 1.49E-02 |
| 11 | 5383 | F3 vs. S3 | + | Signaling and response | Stress        | response to heat                            | GO:0009408 | P | 131  | 2.74E-05 | 5.18E-04 |
| 11 | 5384 | F3 vs. S3 | + | Signaling and response | Stress        | response to high light intensity            | GO:0009644 | P | 46   | 6.14E-04 | 7.84E-03 |
| 11 | 5385 | F3 vs. S3 | + | Signaling and response | Stress        | response to nematode                        | GO:0009624 | P | 65   | 5.76E-03 | 4.73E-02 |
| 11 | 5386 | F3 vs. S3 | + | Signaling and response | Stress        | response to osmotic stress                  | GO:0006970 | P | 365  | 2.61E-03 | 2.52E-02 |
| 11 | 5387 | F3 vs. S3 | + | Signaling and response | Stress        | response to other organism                  | GO:0051707 | P | 732  | 1.14E-08 | 4.95E-07 |
| 11 | 5388 | F3 vs. S3 | + | Signaling and response | Stress        | response to oxidative stress                | GO:0006979 | P | 319  | 2.29E-05 | 4.41E-04 |
| 11 | 5389 | F3 vs. S3 | + | Signaling and response | Stress        | response to radiation                       | GO:0009314 | P | 506  | 6.49E-06 | 1.57E-04 |
| 11 | 5390 | F3 vs. S3 | + | Signaling and response | Stress        | response to reactive oxygen species         | GO:0000302 | P | 112  | 3.77E-03 | 3.36E-02 |
| 11 | 5391 | F3 vs. S3 | + | Signaling and response | Stress        | response to starvation                      | GO:0042594 | P | 129  | 6.52E-04 | 8.27E-03 |
| 11 | 5392 | F3 vs. S3 | + | Signaling and response | Stress        | response to stress                          | GO:0006950 | P | 2009 | 1.32E-06 | 3.94E-05 |
| 11 | 5393 | F3 vs. S3 | + | Signaling and response | Stress        | response to toxic substance                 | GO:0009636 | P | 81   | 5.51E-09 | 2.62E-07 |
| 11 | 5394 | F3 vs. S3 | + | Signaling and response | Stress        | response to water deprivation               | GO:0009414 | P | 252  | 1.00E-04 | 1.62E-03 |
| 11 | 5395 | F3 vs. S3 | + | Signaling and response | Stress        | response to wounding                        | GO:0009611 | P | 156  | 1.36E-08 | 5.81E-07 |
| 11 | 5396 | F3 vs. S3 | + | Signaling and response | Stress        | toxin catabolic process                     | GO:0009407 | P | 26   | 1.50E-04 | 2.31E-03 |
| 11 | 5397 | F3 vs. S3 | + | Signaling and response | Stress        | toxin metabolic process                     | GO:0009404 | P | 36   | 1.36E-05 | 2.92E-04 |
| 11 | 5398 | F3 vs. S3 | + | Signaling and response | Stress        | transition metal ion homeostasis            | GO:0055076 | P | 65   | 4.64E-03 | 3.96E-02 |
| 11 | 5399 | F3 vs. S3 | + | Signaling and response | Stress        | vitamin biosynthetic process                | GO:0009110 | P | 41   | 4.11E-03 | 3.60E-02 |
| 11 | 5400 | F3 vs. S3 | + | Signaling and response | Stress        | vitamin metabolic process                   | GO:0006766 | P | 48   | 1.15E-03 | 1.33E-02 |
| 11 | 5401 | F3 vs. S3 | + | Signaling and response | Stress        | water-soluble vitamin metabolic process     | GO:0006767 | P | 40   | 2.03E-03 | 2.09E-02 |
| 11 | 5402 | F3 vs. S3 | - | Development            | Cell division | asymmetric cell division                    | GO:0008356 | P | 16   | 1.29E-03 | 1.46E-02 |
| 11 | 5403 | F3 vs. S3 | - | Development            | Cell division | ATP-dependent microtubule motor activity    | GO:1990939 | F | 15   | 3.08E-05 | 9.60E-04 |
| 11 | 5404 | F3 vs. S3 | - | Development            | Cell division | base-excision repair                        | GO:0006284 | P | 15   | 4.15E-04 | 5.60E-03 |
| 11 | 5405 | F3 vs. S3 | - | Development            | Cell division | cell cycle                                  | GO:0007049 | P | 287  | 0.00E+00 | 0.00E+00 |
| 11 | 5406 | F3 vs. S3 | - | Development            | Cell division | cell cycle checkpoint                       | GO:0000075 | P | 24   | 6.21E-05 | 1.08E-03 |
| 11 | 5407 | F3 vs. S3 | - | Development            | Cell division | cell cycle DNA replication                  | GO:0044786 | P | 24   | 8.49E-04 | 1.03E-02 |
| 11 | 5408 | F3 vs. S3 | - | Development            | Cell division | cell cycle phase transition                 | GO:0044770 | P | 32   | 2.43E-06 | 6.59E-05 |
| 11 | 5409 | F3 vs. S3 | - | Development            | Cell division | cell cycle process                          | GO:0022402 | P | 264  | 0.00E+00 | 0.00E+00 |
| 11 | 5410 | F3 vs. S3 | - | Development            | Cell division | cell division                               | GO:0051301 | P | 148  | 7.19E-04 | 8.85E-03 |
| 11 | 5411 | F3 vs. S3 | - | Development            | Cell division | chromatin assembly                          | GO:0031497 | P | 49   | 5.38E-06 | 1.35E-04 |



|    |      |           |   |             |               |                                                                     |            |   |     |          |          |
|----|------|-----------|---|-------------|---------------|---------------------------------------------------------------------|------------|---|-----|----------|----------|
| 11 | 5412 | F3 vs. S3 | - | Development | Cell division | chromosome                                                          | GO:0005694 | C | 312 | 1.05E-13 | 3.05E-12 |
| 11 | 5413 | F3 vs. S3 | - | Development | Cell division | chromosome organization involved in meiotic cell cycle              | GO:0070192 | P | 26  | 1.30E-03 | 1.47E-02 |
| 11 | 5414 | F3 vs. S3 | - | Development | Cell division | chromosome segregation                                              | GO:0007059 | P | 61  | 1.27E-06 | 3.84E-05 |
| 11 | 5415 | F3 vs. S3 | - | Development | Cell division | chromosome separation                                               | GO:0051304 | P | 10  | 5.17E-04 | 6.71E-03 |
| 11 | 5416 | F3 vs. S3 | - | Development | Cell division | chromosome, centromeric region                                      | GO:0000775 | C | 24  | 3.78E-05 | 4.08E-04 |
| 11 | 5417 | F3 vs. S3 | - | Development | Cell division | condensed chromosome                                                | GO:0000793 | C | 38  | 7.55E-05 | 7.34E-04 |
| 11 | 5418 | F3 vs. S3 | - | Development | Cell division | condensed nuclear chromosome                                        | GO:0000794 | C | 24  | 2.40E-04 | 2.00E-03 |
| 11 | 5419 | F3 vs. S3 | - | Development | Cell division | condensin complex                                                   | GO:0000796 | C | 7   | 2.71E-03 | 1.66E-02 |
| 11 | 5420 | F3 vs. S3 | - | Development | Cell division | cyclin-dependent protein kinase holoenzyme complex                  | GO:0000307 | C | 40  | 8.69E-06 | 1.05E-04 |
|    |      |           |   |             |               |                                                                     |            |   |     |          |          |
| 11 | 5421 | F3 vs. S3 | - | Development | Cell division | cyclin-dependent protein serine/threonine kinase regulator activity | GO:0016538 | F | 34  | 2.11E-07 | 1.16E-05 |
| 11 | 5422 | F3 vs. S3 | - | Development | Cell division | cytokinesis by cell plate formation                                 | GO:0000911 | P | 48  | 3.31E-06 | 8.63E-05 |
| 11 | 5423 | F3 vs. S3 | - | Development | Cell division | DNA helicase activity                                               | GO:0003678 | F | 33  | 4.32E-04 | 9.02E-03 |
| 11 | 5424 | F3 vs. S3 | - | Development | Cell division | DNA integrity checkpoint                                            | GO:0031570 | P | 15  | 4.94E-04 | 6.49E-03 |
| 11 | 5425 | F3 vs. S3 | - | Development | Cell division | DNA packaging                                                       | GO:0006323 | P | 59  | 4.21E-06 | 1.08E-04 |
| 11 | 5426 | F3 vs. S3 | - | Development | Cell division | DNA packaging complex                                               | GO:0044815 | C | 18  | 2.02E-04 | 1.70E-03 |
| 11 | 5427 | F3 vs. S3 | - | Development | Cell division | DNA recombination                                                   | GO:0006310 | P | 84  | 4.74E-07 | 1.56E-05 |
| 11 | 5428 | F3 vs. S3 | - | Development | Cell division | DNA repair                                                          | GO:0006281 | P | 191 | 2.41E-12 | 2.05E-10 |
| 11 | 5429 | F3 vs. S3 | - | Development | Cell division | DNA replication                                                     | GO:0006260 | P | 76  | 2.05E-07 | 7.20E-06 |
| 11 | 5430 | F3 vs. S3 | - | Development | Cell division | DNA replication checkpoint                                          | GO:0000076 | P | 11  | 4.31E-03 | 3.75E-02 |
| 11 | 5431 | F3 vs. S3 | - | Development | Cell division | DNA replication initiation                                          | GO:0006270 | P | 16  | 5.60E-05 | 9.88E-04 |
| 11 | 5432 | F3 vs. S3 | - | Development | Cell division | DNA replication origin binding                                      | GO:0003688 | F | 13  | 2.31E-04 | 5.28E-03 |
| 11 | 5433 | F3 vs. S3 | - | Development | Cell division | DNA-dependent DNA replication                                       | GO:0006261 | P | 67  | 1.83E-07 | 6.47E-06 |
| 11 | 5434 | F3 vs. S3 | - | Development | Cell division | double-strand break repair                                          | GO:0006302 | P | 76  | 1.75E-06 | 4.95E-05 |
| 11 | 5435 | F3 vs. S3 | - | Development | Cell division | double-strand break repair via homologous recombination             | GO:0000724 | P | 52  | 7.09E-05 | 1.22E-03 |
| 11 | 5436 | F3 vs. S3 | - | Development | Cell division | homologous recombination                                            | GO:0035825 | P | 29  | 2.71E-04 | 3.90E-03 |
| 11 | 5437 | F3 vs. S3 | - | Development | Cell division | kinetochore                                                         | GO:0000776 | C | 14  | 5.29E-04 | 4.01E-03 |
| 11 | 5438 | F3 vs. S3 | - | Development | Cell division | male meiotic nuclear division                                       | GO:0007140 | P | 13  | 6.53E-04 | 8.27E-03 |
| 11 | 5439 | F3 vs. S3 | - | Development | Cell division | meiosis I                                                           | GO:0007127 | P | 38  | 7.38E-05 | 1.25E-03 |
| 11 | 5440 | F3 vs. S3 | - | Development | Cell division | meiosis I cell cycle process                                        | GO:0061982 | P | 41  | 1.09E-05 | 2.42E-04 |
| 11 | 5441 | F3 vs. S3 | - | Development | Cell division | meiotic cell cycle                                                  | GO:0051321 | P | 90  | 1.05E-09 | 5.83E-08 |
| 11 | 5442 | F3 vs. S3 | - | Development | Cell division | meiotic cell cycle process                                          | GO:1903046 | P | 80  | 3.05E-08 | 1.23E-06 |
| 11 | 5443 | F3 vs. S3 | - | Development | Cell division | meiotic chromosome segregation                                      | GO:0045132 | P | 29  | 5.91E-04 | 7.62E-03 |
| 11 | 5444 | F3 vs. S3 | - | Development | Cell division | meiotic chromosome separation                                       | GO:0051307 | P | 8   | 1.86E-03 | 1.94E-02 |
| 11 | 5445 | F3 vs. S3 | - | Development | Cell division | meiotic nuclear division                                            | GO:0140013 | P | 52  | 3.60E-07 | 1.22E-05 |
| 11 | 5446 | F3 vs. S3 | - | Development | Cell division | microtubule cytoskeleton organization involved in mitosis           | GO:1902850 | P | 20  | 5.93E-05 | 1.04E-03 |
| 11 | 5447 | F3 vs. S3 | - | Development | Cell division | microtubule motor activity                                          | GO:0003777 | F | 45  | 4.06E-06 | 1.49E-04 |
| 11 | 5448 | F3 vs. S3 | - | Development | Cell division | mitotic cell cycle                                                  | GO:0000278 | P | 160 | 1.75E-11 | 1.33E-09 |
| 11 | 5449 | F3 vs. S3 | - | Development | Cell division | mitotic cell cycle checkpoint                                       | GO:0007093 | P | 17  | 1.11E-03 | 1.29E-02 |
| 11 | 5450 | F3 vs. S3 | - | Development | Cell division | mitotic cell cycle phase transition                                 | GO:0044772 | P | 32  | 2.43E-06 | 6.62E-05 |
| 11 | 5451 | F3 vs. S3 | - | Development | Cell division | mitotic cell cycle process                                          | GO:1903047 | P | 132 | 1.20E-10 | 8.18E-09 |
| 11 | 5452 | F3 vs. S3 | - | Development | Cell division | mitotic nuclear division                                            | GO:0140014 | P | 39  | 7.92E-06 | 1.87E-04 |
| 11 | 5453 | F3 vs. S3 | - | Development | Cell division | mitotic spindle                                                     | GO:0072686 | C | 13  | 5.08E-06 | 6.38E-05 |
| 11 | 5454 | F3 vs. S3 | - | Development | Cell division | mitotic spindle assembly                                            | GO:0090307 | P | 7   | 4.11E-04 | 5.55E-03 |
| 11 | 5455 | F3 vs. S3 | - | Development | Cell division | mitotic spindle assembly checkpoint                                 | GO:0007094 | P | 6   | 2.79E-03 | 2.67E-02 |
| 11 | 5456 | F3 vs. S3 | - | Development | Cell division | mitotic spindle checkpoint                                          | GO:0071174 | P | 6   | 2.79E-03 | 2.65E-02 |
| 11 | 5457 | F3 vs. S3 | - | Development | Cell division | mitotic spindle organization                                        | GO:0007052 | P | 17  | 7.48E-05 | 1.26E-03 |
| 11 | 5458 | F3 vs. S3 | - | Development | Cell division | negative regulation of cell cycle                                   | GO:0045786 | P | 49  | 1.53E-05 | 3.20E-04 |
| 11 | 5459 | F3 vs. S3 | - | Development | Cell division | negative regulation of cell cycle phase transition                  | GO:1901988 | P | 13  | 1.40E-03 | 1.54E-02 |
| 11 | 5460 | F3 vs. S3 | - | Development | Cell division | negative regulation of cell cycle process                           | GO:0010948 | P | 30  | 1.32E-03 | 1.49E-02 |
| 11 | 5461 | F3 vs. S3 | - | Development | Cell division | negative regulation of chromosome organization                      | GO:2001251 | P | 7   | 2.77E-03 | 2.65E-02 |
| 11 | 5462 | F3 vs. S3 | - | Development | Cell division | negative regulation of chromosome segregation                       | GO:0051985 | P | 6   | 2.79E-03 | 2.66E-02 |
| 11 | 5463 | F3 vs. S3 | - | Development | Cell division | negative regulation of chromosome separation                        | GO:1905819 | P | 6   | 2.79E-03 | 2.62E-02 |
|    |      |           |   |             |               |                                                                     |            |   |     |          |          |
| 11 | 5464 | F3 vs. S3 | - | Development | Cell division | negative regulation of metaphase/anaphase transition of cell cycle  | GO:1902100 | P | 6   | 2.79E-03 | 2.64E-02 |
| 11 | 5465 | F3 vs. S3 | - | Development | Cell division | negative regulation of mitotic cell cycle                           | GO:0045930 | P | 27  | 3.59E-03 | 3.21E-02 |
| 11 | 5466 | F3 vs. S3 | - | Development | Cell division | negative regulation of mitotic cell cycle phase transition          | GO:1901991 | P | 13  | 1.40E-03 | 1.54E-02 |
| 11 | 5467 | F3 vs. S3 | - | Development | Cell division | negative regulation of mitotic metaphase/anaphase transition        | GO:0045841 | P | 6   | 2.79E-03 | 2.63E-02 |
| 11 | 5468 | F3 vs. S3 | - | Development | Cell division | negative regulation of mitotic sister chromatid segregation         | GO:0033048 | P | 6   | 2.79E-03 | 2.66E-02 |
| 11 | 5469 | F3 vs. S3 | - | Development | Cell division | negative regulation of mitotic sister chromatid separation          | GO:2000816 | P | 6   | 2.79E-03 | 2.66E-02 |
| 11 | 5470 | F3 vs. S3 | - | Development | Cell division | negative regulation of sister chromatid segregation                 | GO:0033046 | P | 6   | 2.79E-03 | 2.65E-02 |
| 11 | 5471 | F3 vs. S3 | - | Development | Cell division | nuclear chromosome segregation                                      | GO:0098813 | P | 55  | 5.81E-06 | 1.42E-04 |
| 11 | 5472 | F3 vs. S3 | - | Development | Cell division | nuclear division                                                    | GO:0000280 | P | 88  | 2.25E-12 | 1.95E-10 |
| 11 | 5473 | F3 vs. S3 | - | Development | Cell division | nuclear DNA replication                                             | GO:0033260 | P | 13  | 3.33E-04 | 4.67E-03 |



|    |      |           |   |             |               |                                                           |            |   |      |          |          |
|----|------|-----------|---|-------------|---------------|-----------------------------------------------------------|------------|---|------|----------|----------|
| 11 | 5474 | F3 vs. S3 | - | Development | Cell division | nuclear replication fork                                  | GO:0043596 | C | 17   | 1.64E-04 | 1.42E-03 |
| 11 | 5475 | F3 vs. S3 | - | Development | Cell division | nucleic acid metabolic process                            | GO:0090304 | P | 1040 | 0.00E+00 | 0.00E+00 |
| 11 | 5476 | F3 vs. S3 | - | Development | Cell division | nucleobase-containing compound metabolic process          | GO:0006139 | P | 1305 | 7.85E-14 | 8.47E-12 |
| 11 | 5477 | F3 vs. S3 | - | Development | Cell division | nucleosome assembly                                       | GO:0006334 | P | 31   | 9.82E-06 | 2.21E-04 |
| 11 | 5478 | F3 vs. S3 | - | Development | Cell division | preprophase band                                          | GO:0009574 | C | 14   | 1.09E-03 | 7.83E-03 |
| 11 | 5479 | F3 vs. S3 | - | Development | Cell division | reciprocal homologous recombination                       | GO:0140527 | P | 29   | 2.71E-04 | 3.92E-03 |
| 11 | 5480 | F3 vs. S3 | - | Development | Cell division | reciprocal meiotic recombination                          | GO:0007131 | P | 29   | 2.71E-04 | 3.91E-03 |
| 11 | 5481 | F3 vs. S3 | - | Development | Cell division | recombinational repair                                    | GO:0000725 | P | 56   | 2.45E-04 | 3.56E-03 |
| 11 | 5482 | F3 vs. S3 | - | Development | Cell division | regulation of cell cycle                                  | GO:0051726 | P | 160  | 5.00E-15 | 6.23E-13 |
| 11 | 5483 | F3 vs. S3 | - | Development | Cell division | regulation of cell cycle phase transition                 | GO:1901987 | P | 36   | 4.17E-05 | 7.54E-04 |
| 11 | 5484 | F3 vs. S3 | - | Development | Cell division | regulation of cell cycle process                          | GO:0010564 | P | 82   | 3.03E-08 | 1.23E-06 |
| 11 | 5485 | F3 vs. S3 | - | Development | Cell division | regulation of cell division                               | GO:0051302 | P | 41   | 1.37E-04 | 2.14E-03 |
| 11 | 5486 | F3 vs. S3 | - | Development | Cell division | regulation of cell population proliferation               | GO:0042127 | P | 42   | 1.42E-03 | 1.55E-02 |
| 11 | 5487 | F3 vs. S3 | - | Development | Cell division | regulation of chromatin organization                      | GO:1902275 | P | 41   | 1.56E-03 | 1.67E-02 |
| 11 | 5488 | F3 vs. S3 | - | Development | Cell division | regulation of chromosome organization                     | GO:0033044 | P | 46   | 7.60E-06 | 1.81E-04 |
| 11 | 5489 | F3 vs. S3 | - | Development | Cell division | regulation of chromosome segregation                      | GO:0051983 | P | 17   | 7.06E-04 | 8.72E-03 |
| 11 | 5490 | F3 vs. S3 | - | Development | Cell division | regulation of chromosome separation                       | GO:1905818 | P | 16   | 1.38E-03 | 1.53E-02 |
| 11 | 5491 | F3 vs. S3 | - | Development | Cell division | regulation of cyclin-dependent protein kinase activity    | GO:1904029 | P | 38   | 1.56E-05 | 3.24E-04 |
| 11 | 5492 | F3 vs. S3 | - | Development | Cell division | regulation of DNA metabolic process                       | GO:0051052 | P | 56   | 3.03E-07 | 1.04E-05 |
| 11 | 5493 | F3 vs. S3 | - | Development | Cell division | regulation of DNA recombination                           | GO:0000018 | P | 18   | 1.88E-03 | 1.95E-02 |
| 11 | 5494 | F3 vs. S3 | - | Development | Cell division | regulation of double-strand break repair                  | GO:2000779 | P | 6    | 3.10E-03 | 2.85E-02 |
| 11 | 5495 | F3 vs. S3 | - | Development | Cell division | regulation of meiotic cell cycle                          | GO:0051445 | P | 12   | 8.26E-04 | 1.00E-02 |
| 11 | 5496 | F3 vs. S3 | - | Development | Cell division | regulation of metaphase/anaphase transition of cell cycle | GO:1902099 | P | 16   | 1.38E-03 | 1.53E-02 |
| 11 | 5497 | F3 vs. S3 | - | Development | Cell division | regulation of mitotic cell cycle                          | GO:0007346 | P | 56   | 9.66E-06 | 2.18E-04 |
| 11 | 5498 | F3 vs. S3 | - | Development | Cell division | regulation of mitotic cell cycle phase transition         | GO:1901990 | P | 34   | 1.58E-04 | 2.42E-03 |
| 11 | 5499 | F3 vs. S3 | - | Development | Cell division | regulation of mitotic metaphase/anaphase transition       | GO:0030071 | P | 16   | 1.38E-03 | 1.53E-02 |
| 11 | 5500 | F3 vs. S3 | - | Development | Cell division | regulation of mitotic sister chromatid segregation        | GO:0033047 | P | 7    | 6.54E-04 | 8.26E-03 |
| 11 | 5501 | F3 vs. S3 | - | Development | Cell division | regulation of mitotic sister chromatid separation         | GO:0010965 | P | 16   | 1.38E-03 | 1.54E-02 |
| 11 | 5502 | F3 vs. S3 | - | Development | Cell division | regulation of mitotic spindle organization                | GO:0060236 | P | 5    | 3.33E-03 | 3.03E-02 |
| 11 | 5503 | F3 vs. S3 | - | Development | Cell division | regulation of nuclear division                            | GO:0051783 | P | 33   | 1.01E-03 | 1.20E-02 |
| 11 | 5504 | F3 vs. S3 | - | Development | Cell division | regulation of sister chromatid segregation                | GO:0033045 | P | 17   | 7.06E-04 | 8.70E-03 |
| 11 | 5505 | F3 vs. S3 | - | Development | Cell division | regulation of spindle organization                        | GO:0090224 | P | 5    | 3.33E-03 | 3.02E-02 |
| 11 | 5506 | F3 vs. S3 | - | Development | Cell division | replication fork                                          | GO:0005657 | C | 28   | 3.25E-06 | 4.25E-05 |
| 11 | 5507 | F3 vs. S3 | - | Development | Cell division | replisome                                                 | GO:0030894 | C | 14   | 1.28E-03 | 8.68E-03 |
| 11 | 5508 | F3 vs. S3 | - | Development | Cell division | resolution of meiotic recombination intermediates         | GO:0000712 | P | 7    | 3.44E-03 | 3.10E-02 |
| 11 | 5509 | F3 vs. S3 | - | Development | Cell division | RNA metabolic process                                     | GO:0016070 | P | 803  | 0.00E+00 | 0.00E+00 |
| 11 | 5510 | F3 vs. S3 | - | Development | Cell division | single-stranded DNA binding                               | GO:0003697 | F | 57   | 2.07E-05 | 6.83E-04 |
| 11 | 5511 | F3 vs. S3 | - | Development | Cell division | sister chromatid segregation                              | GO:0000819 | P | 36   | 5.00E-04 | 6.55E-03 |
| 11 | 5512 | F3 vs. S3 | - | Development | Cell division | spindle                                                   | GO:0005819 | C | 54   | 2.21E-12 | 6.09E-11 |
| 11 | 5513 | F3 vs. S3 | - | Development | Cell division | spindle assembly                                          | GO:0051225 | P | 28   | 7.91E-07 | 2.52E-05 |
| 11 | 5514 | F3 vs. S3 | - | Development | Cell division | spindle assembly checkpoint                               | GO:0071173 | P | 6    | 2.79E-03 | 2.64E-02 |
| 11 | 5515 | F3 vs. S3 | - | Development | Cell division | spindle checkpoint                                        | GO:0031577 | P | 6    | 2.79E-03 | 2.63E-02 |
| 11 | 5516 | F3 vs. S3 | - | Development | Cell division | spindle microtubule                                       | GO:0005876 | C | 15   | 1.39E-04 | 1.24E-03 |
| 11 | 5517 | F3 vs. S3 | - | Development | Cell division | spindle organization                                      | GO:0007051 | P | 39   | 3.77E-08 | 1.46E-06 |
| 11 | 5518 | F3 vs. S3 | - | Development | Cell division | spindle pole                                              | GO:0000922 | C | 5    | 2.32E-03 | 1.44E-02 |
| 11 | 5519 | F3 vs. S3 | - | Development | Development   | adaxial/abaxial pattern specification                     | GO:0009955 | P | 32   | 7.25E-04 | 8.89E-03 |
| 11 | 5520 | F3 vs. S3 | - | Development | Development   | carpel development                                        | GO:0048440 | P | 59   | 1.21E-04 | 1.92E-03 |
| 11 | 5521 | F3 vs. S3 | - | Development | Development   | cell fate commitment                                      | GO:0045165 | P | 40   | 2.44E-03 | 2.39E-02 |
| 11 | 5522 | F3 vs. S3 | - | Development | Development   | cell plate assembly                                       | GO:0000919 | P | 9    | 4.74E-03 | 4.03E-02 |
| 11 | 5523 | F3 vs. S3 | - | Development | Development   | cellular component assembly                               | GO:0022607 | P | 566  | 1.53E-12 | 1.39E-10 |
| 11 | 5524 | F3 vs. S3 | - | Development | Development   | cellular component biogenesis                             | GO:0044085 | P | 893  | 2.14E-09 | 1.14E-07 |
| 11 | 5525 | F3 vs. S3 | - | Development | Development   | cellular component organization                           | GO:0016043 | P | 1586 | 1.11E-08 | 4.89E-07 |
| 11 | 5526 | F3 vs. S3 | - | Development | Development   | cellular component organization or biogenesis             | GO:0071840 | P | 1856 | 2.13E-09 | 1.15E-07 |
| 11 | 5527 | F3 vs. S3 | - | Development | Development   | cellular localization                                     | GO:0051641 | P | 641  | 2.26E-03 | 2.27E-02 |
| 11 | 5528 | F3 vs. S3 | - | Development | Development   | chromatin                                                 | GO:0000785 | C | 202  | 6.31E-05 | 6.38E-04 |
| 11 | 5529 | F3 vs. S3 | - | Development | Development   | chromatin assembly or disassembly                         | GO:0006333 | P | 56   | 3.47E-07 | 1.18E-05 |
| 11 | 5530 | F3 vs. S3 | - | Development | Development   | chromatin organization                                    | GO:0006325 | P | 211  | 3.26E-13 | 3.26E-11 |
| 11 | 5531 | F3 vs. S3 | - | Development | Development   | chromosomal region                                        | GO:0098687 | C | 33   | 2.56E-06 | 3.53E-05 |
| 11 | 5532 | F3 vs. S3 | - | Development | Development   | chromosome organization                                   | GO:0051276 | P | 303  | 0.00E+00 | 0.00E+00 |
| 11 | 5533 | F3 vs. S3 | - | Development | Development   | cortical cytoskeleton                                     | GO:0030863 | C | 32   | 1.90E-04 | 1.63E-03 |
| 11 | 5534 | F3 vs. S3 | - | Development | Development   | cortical cytoskeleton organization                        | GO:0030865 | P | 44   | 6.83E-05 | 1.18E-03 |
| 11 | 5535 | F3 vs. S3 | - | Development | Development   | cortical microtubule                                      | GO:0055028 | C | 30   | 1.53E-04 | 1.34E-03 |
| 11 | 5536 | F3 vs. S3 | - | Development | Development   | cortical microtubule cytoskeleton                         | GO:0030981 | C | 31   | 6.23E-05 | 6.37E-04 |
| 11 | 5537 | F3 vs. S3 | - | Development | Development   | cortical microtubule organization                         | GO:0043622 | P | 32   | 2.35E-03 | 2.35E-02 |

|    |      |           |   |             |             |                                                                    |            |   |       |          |          |
|----|------|-----------|---|-------------|-------------|--------------------------------------------------------------------|------------|---|-------|----------|----------|
| 11 | 5538 | F3 vs. S3 | - | Development | Development | cytoplasmic microtubule                                            | GO:0005881 | C | 36    | 7.13E-05 | 7.07E-04 |
| 11 | 5539 | F3 vs. S3 | - | Development | Development | cytoplasmic microtubule organization                               | GO:0031122 | P | 40    | 8.50E-04 | 1.03E-02 |
| 11 | 5540 | F3 vs. S3 | - | Development | Development | cytoskeletal protein binding                                       | GO:0008092 | F | 206   | 6.11E-04 | 1.20E-02 |
| 11 | 5541 | F3 vs. S3 | - | Development | Development | cytoskeleton                                                       | GO:0005856 | C | 206   | 3.89E-07 | 6.04E-06 |
| 11 | 5542 | F3 vs. S3 | - | Development | Development | determination of bilateral symmetry                                | GO:0009855 | P | 6     | 3.64E-03 | 3.25E-02 |
| 11 | 5543 | F3 vs. S3 | - | Development | Development | embryo development                                                 | GO:0009790 | P | 349   | 7.49E-04 | 9.18E-03 |
| 11 | 5544 | F3 vs. S3 | - | Development | Development | embryo development ending in seed dormancy                         | GO:0009793 | P | 335   | 6.10E-04 | 7.83E-03 |
| 11 | 5545 | F3 vs. S3 | - | Development | Development | equatorial microtubule organizing center                           | GO:0000923 | C | 4     | 8.56E-03 | 4.33E-02 |
| 11 | 5546 | F3 vs. S3 | - | Development | Development | floral organ development                                           | GO:0048437 | P | 178   | 1.28E-04 | 2.01E-03 |
| 11 | 5547 | F3 vs. S3 | - | Development | Development | floral whorl development                                           | GO:0048438 | P | 142   | 3.83E-05 | 6.99E-04 |
| 11 | 5548 | F3 vs. S3 | - | Development | Development | flower development                                                 | GO:0009908 | P | 262   | 6.60E-05 | 1.14E-03 |
| 11 | 5549 | F3 vs. S3 | - | Development | Development | gamma-tubulin complex                                              | GO:0000930 | C | 7     | 2.22E-03 | 1.39E-02 |
| 11 | 5550 | F3 vs. S3 | - | Development | Development | GPI anchor metabolic process                                       | GO:0006505 | P | 19    | 5.22E-03 | 4.37E-02 |
| 11 | 5551 | F3 vs. S3 | - | Development | Development | guard cell differentiation                                         | GO:0010052 | P | 11    | 4.96E-03 | 4.19E-02 |
| 11 | 5552 | F3 vs. S3 | - | Development | Development | gynoecium development                                              | GO:0048467 | P | 68    | 2.77E-05 | 5.22E-04 |
| 11 | 5553 | F3 vs. S3 | - | Development | Development | host cell                                                          | GO:0043657 | C | 88    | 2.84E-04 | 2.33E-03 |
| 11 | 5554 | F3 vs. S3 | - | Development | Development | host cell nucleus                                                  | GO:0042025 | C | 88    | 2.84E-04 | 2.29E-03 |
| 11 | 5555 | F3 vs. S3 | - | Development | Development | host cell part                                                     | GO:0033643 | C | 88    | 2.84E-04 | 2.22E-03 |
| 11 | 5556 | F3 vs. S3 | - | Development | Development | host cellular component                                            | GO:0018995 | C | 88    | 2.84E-04 | 2.35E-03 |
| 11 | 5557 | F3 vs. S3 | - | Development | Development | host intracellular membrane-bounded organelle                      | GO:0033648 | C | 88    | 2.84E-04 | 2.27E-03 |
| 11 | 5558 | F3 vs. S3 | - | Development | Development | host intracellular organelle                                       | GO:0033647 | C | 88    | 2.84E-04 | 2.25E-03 |
| 11 | 5559 | F3 vs. S3 | - | Development | Development | host intracellular part                                            | GO:0033646 | C | 88    | 2.84E-04 | 2.24E-03 |
| 11 | 5560 | F3 vs. S3 | - | Development | Development | host intracellular region                                          | GO:0043656 | C | 88    | 2.84E-04 | 2.31E-03 |
| 11 | 5561 | F3 vs. S3 | - | Development | Development | intracellular membrane-bounded organelle                           | GO:0043231 | C | 10668 | 3.75E-03 | 2.24E-02 |
| 11 | 5562 | F3 vs. S3 | - | Development | Development | intracellular non-membrane-bounded organelle                       | GO:0043232 | C | 1145  | 0.00E+00 | 0.00E+00 |
| 11 | 5563 | F3 vs. S3 | - | Development | Development | intracellular organelle                                            | GO:0043229 | C | 10881 | 1.12E-03 | 7.94E-03 |
| 11 | 5564 | F3 vs. S3 | - | Development | Development | intracellular organelle lumen                                      | GO:0070013 | C | 868   | 0.00E+00 | 0.00E+00 |
| 11 | 5565 | F3 vs. S3 | - | Development | Development | kinetochore microtubule                                            | GO:0005828 | C | 5     | 2.33E-03 | 1.44E-02 |
| 11 | 5566 | F3 vs. S3 | - | Development | Development | leaf morphogenesis                                                 | GO:0009965 | P | 69    | 4.98E-03 | 4.20E-02 |
| 11 | 5567 | F3 vs. S3 | - | Development | Development | membrane-bounded organelle                                         | GO:0043227 | C | 10757 | 6.48E-03 | 3.47E-02 |
| 11 | 5568 | F3 vs. S3 | - | Development | Development | membrane-enclosed lumen                                            | GO:0031974 | C | 868   | 0.00E+00 | 0.00E+00 |
| 11 | 5569 | F3 vs. S3 | - | Development | Development | meristem development                                               | GO:0048507 | P | 137   | 4.92E-04 | 6.48E-03 |
| 11 | 5570 | F3 vs. S3 | - | Development | Development | microtubule                                                        | GO:0005874 | C | 102   | 1.31E-10 | 2.95E-09 |
| 11 | 5571 | F3 vs. S3 | - | Development | Development | microtubule associated complex                                     | GO:0005875 | C | 52    | 4.80E-08 | 8.98E-07 |
| 11 | 5572 | F3 vs. S3 | - | Development | Development | microtubule cytoskeleton                                           | GO:0015630 | C | 148   | 5.77E-15 | 1.91E-13 |
| 11 | 5573 | F3 vs. S3 | - | Development | Development | microtubule cytoskeleton organization                              | GO:0000226 | P | 113   | 6.22E-08 | 2.36E-06 |
| 11 | 5574 | F3 vs. S3 | - | Development | Development | microtubule nucleation                                             | GO:0007020 | P | 9     | 2.03E-03 | 2.09E-02 |
|    |      |           |   |             |             | microtubule nucleation by interphase microtubule organizing center | GO:0051415 | P | 6     | 1.03E-03 | 1.21E-02 |
| 11 | 5575 | F3 vs. S3 | - | Development | Development | microtubule nucleation by microtubule organizing center            | GO:0051418 | P | 6     | 1.03E-03 | 1.21E-02 |
| 11 | 5576 | F3 vs. S3 | - | Development | Development | microtubule organizing center                                      | GO:0005815 | C | 15    | 4.08E-03 | 2.40E-02 |
| 11 | 5577 | F3 vs. S3 | - | Development | Development | microtubule polymerization                                         | GO:0046785 | P | 12    | 7.66E-05 | 1.29E-03 |
| 11 | 5578 | F3 vs. S3 | - | Development | Development | microtubule-based movement                                         | GO:0007018 | P | 46    | 4.90E-06 | 1.25E-04 |
| 11 | 5579 | F3 vs. S3 | - | Development | Development | microtubule-based process                                          | GO:0007017 | P | 158   | 2.54E-13 | 2.64E-11 |
| 11 | 5580 | F3 vs. S3 | - | Development | Development | movement of cell or subcellular component                          | GO:0006928 | P | 65    | 2.09E-03 | 2.12E-02 |
| 11 | 5581 | F3 vs. S3 | - | Development | Development | non-membrane-bounded organelle                                     | GO:0043228 | C | 1145  | 0.00E+00 | 0.00E+00 |
| 11 | 5582 | F3 vs. S3 | - | Development | Development | nuclear body                                                       | GO:0016604 | C | 81    | 7.37E-05 | 7.23E-04 |
| 11 | 5583 | F3 vs. S3 | - | Development | Development | nuclear chromatin                                                  | GO:0000790 | C | 157   | 6.27E-03 | 3.40E-02 |
| 11 | 5584 | F3 vs. S3 | - | Development | Development | nuclear chromosome                                                 | GO:0000228 | C | 209   | 1.82E-07 | 2.96E-06 |
| 11 | 5585 | F3 vs. S3 | - | Development | Development | nuclear envelope                                                   | GO:0005635 | C | 67    | 2.15E-03 | 1.36E-02 |
| 11 | 5586 | F3 vs. S3 | - | Development | Development | nuclear lumen                                                      | GO:0031981 | C | 761   | 0.00E+00 | 0.00E+00 |
|    |      |           |   |             |             | nuclear outer membrane-endoplasmic reticulum membrane              |            |   |       |          |          |
| 11 | 5587 | F3 vs. S3 | - | Development | Development | network                                                            | GO:0042175 | C | 200   | 9.74E-03 | 4.76E-02 |
| 11 | 5588 | F3 vs. S3 | - | Development | Development | nuclear pore                                                       | GO:0005643 | C | 31    | 3.26E-03 | 1.99E-02 |
| 11 | 5589 | F3 vs. S3 | - | Development | Development | nuclear replisome                                                  | GO:0043601 | C | 14    | 1.28E-03 | 8.74E-03 |
| 11 | 5590 | F3 vs. S3 | - | Development | Development | nucleic acid phosphodiester bond hydrolysis                        | GO:0090305 | P | 52    | 6.29E-04 | 8.02E-03 |
| 11 | 5591 | F3 vs. S3 | - | Development | Development | nucleoplasm                                                        | GO:0005654 | C | 286   | 6.57E-14 | 1.98E-12 |
| 11 | 5592 | F3 vs. S3 | - | Development | Development | nucleus                                                            | GO:0005634 | C | 5749  | 0.00E+00 | 0.00E+00 |
| 11 | 5593 | F3 vs. S3 | - | Development | Development | organelle                                                          | GO:0043226 | C | 10889 | 1.24E-03 | 8.53E-03 |
| 11 | 5594 | F3 vs. S3 | - | Development | Development | organelle assembly                                                 | GO:0070925 | P | 136   | 0.00E+00 | 0.00E+00 |
| 11 | 5595 | F3 vs. S3 | - | Development | Development | organelle fission                                                  | GO:0048285 | P | 118   | 1.87E-11 | 1.38E-09 |
| 11 | 5596 | F3 vs. S3 | - | Development | Development | organelle lumen                                                    | GO:0043233 | C | 868   | 0.00E+00 | 0.00E+00 |
| 11 | 5597 | F3 vs. S3 | - | Development | Development | organelle organization                                             | GO:0006996 | P | 1094  | 0.00E+00 | 0.00E+00 |
| 11 | 5598 | F3 vs. S3 | - | Development | Development | pattern specification process                                      | GO:0007389 | P | 132   | 9.84E-06 | 2.21E-04 |
| 11 | 5599 | F3 vs. S3 | - | Development | Development |                                                                    |            |   |       |          |          |

|    |      |           |   |             |               |                                                             |            |   |      |          |          |
|----|------|-----------|---|-------------|---------------|-------------------------------------------------------------|------------|---|------|----------|----------|
| 11 | 5600 | F3 vs. S3 | - | Development | Development   | phragmoplast                                                | GO:0009524 | C | 47   | 2.73E-06 | 3.72E-05 |
| 11 | 5601 | F3 vs. S3 | - | Development | Development   | phyllome development                                        | GO:0048827 | P | 355  | 4.52E-03 | 3.88E-02 |
| 11 | 5602 | F3 vs. S3 | - | Development | Development   | plant epidermis morphogenesis                               | GO:0090626 | P | 55   | 1.80E-03 | 1.89E-02 |
| 11 | 5603 | F3 vs. S3 | - | Development | Development   | plant ovule development                                     | GO:0048481 | P | 46   | 1.98E-04 | 2.97E-03 |
| 11 | 5604 | F3 vs. S3 | - | Development | Development   | plant-type ovary development                                | GO:0035670 | P | 46   | 1.98E-04 | 2.98E-03 |
| 11 | 5605 | F3 vs. S3 | - | Development | Development   | polymeric cytoskeletal fiber                                | GO:0099513 | C | 111  | 7.00E-08 | 1.22E-06 |
| 11 | 5606 | F3 vs. S3 | - | Development | Development   | post-embryonic development                                  | GO:0009791 | P | 974  | 4.62E-03 | 3.94E-02 |
| 11 | 5607 | F3 vs. S3 | - | Development | Development   | radial pattern formation                                    | GO:0009956 | P | 16   | 1.18E-03 | 1.35E-02 |
| 11 | 5608 | F3 vs. S3 | - | Development | Development   | regionalization                                             | GO:0003002 | P | 109  | 9.55E-07 | 2.97E-05 |
| 11 | 5609 | F3 vs. S3 | - | Development | Development   | reproductive shoot system development                       | GO:0090567 | P | 275  | 2.58E-05 | 4.93E-04 |
| 11 | 5610 | F3 vs. S3 | - | Development | Development   | reproductive structure development                          | GO:0048608 | P | 790  | 2.25E-03 | 2.26E-02 |
| 11 | 5611 | F3 vs. S3 | - | Development | Development   | reproductive system development                             | GO:0061458 | P | 791  | 2.41E-03 | 2.38E-02 |
| 11 | 5612 | F3 vs. S3 | - | Development | Development   | shoot system development                                    | GO:0048367 | P | 498  | 1.33E-04 | 2.08E-03 |
| 11 | 5613 | F3 vs. S3 | - | Development | Development   | shoot system morphogenesis                                  | GO:0010016 | P | 120  | 1.46E-03 | 1.59E-02 |
| 11 | 5614 | F3 vs. S3 | - | Development | Development   | specification of symmetry                                   | GO:0009799 | P | 7    | 3.17E-03 | 2.90E-02 |
| 11 | 5615 | F3 vs. S3 | - | Development | Development   | stomatal complex development                                | GO:0010374 | P | 37   | 1.52E-03 | 1.64E-02 |
| 11 | 5616 | F3 vs. S3 | - | Development | Development   | stomatal complex morphogenesis                              | GO:0010103 | P | 19   | 1.65E-03 | 1.75E-02 |
| 11 | 5617 | F3 vs. S3 | - | Development | Development   | structural constituent of cell wall                         | GO:0005199 | F | 21   | 2.44E-05 | 7.85E-04 |
| 11 | 5618 | F3 vs. S3 | - | Development | Development   | structural molecule activity                                | GO:0005198 | F | 319  | 0.00E+00 | 0.00E+00 |
| 11 | 5619 | F3 vs. S3 | - | Development | Development   | tissue development                                          | GO:0009888 | P | 387  | 5.06E-03 | 4.25E-02 |
| 11 | 5620 | F3 vs. S3 | - | Metabolism  | Bioenergetics | ATP-dependent microtubule motor activity, plus-end-directed | GO:0008574 | F | 14   | 9.78E-05 | 2.58E-03 |
| 11 | 5621 | F3 vs. S3 | - | Metabolism  | Bioenergetics | DNA-dependent ATPase activity                               | GO:0008094 | F | 67   | 4.54E-05 | 1.34E-03 |
| 11 | 5622 | F3 vs. S3 | - | Metabolism  | Bioenergetics | inner mitochondrial membrane protein complex                | GO:0098800 | C | 108  | 1.44E-03 | 9.47E-03 |
| 11 | 5623 | F3 vs. S3 | - | Metabolism  | Bioenergetics | mitochondrial protein complex                               | GO:0098798 | C | 158  | 2.21E-06 | 3.09E-05 |
| 11 | 5624 | F3 vs. S3 | - | Metabolism  | Bioenergetics | mitochondrial respirasome                                   | GO:0005746 | C | 73   | 1.36E-03 | 8.97E-03 |
| 11 | 5625 | F3 vs. S3 | - | Metabolism  | Bioenergetics | mitochondrial respiratory chain complex I                   | GO:0005747 | C | 44   | 6.57E-03 | 3.50E-02 |
| 11 | 5626 | F3 vs. S3 | - | Metabolism  | Bioenergetics | mitochondrion organization                                  | GO:0007005 | P | 123  | 1.30E-03 | 1.47E-02 |
| 11 | 5627 | F3 vs. S3 | - | Metabolism  | Bioenergetics | respirasome                                                 | GO:0070469 | C | 76   | 8.61E-03 | 4.34E-02 |
| 11 | 5628 | F3 vs. S3 | - | Metabolism  | Bioenergetics | respiratory chain complex                                   | GO:0098803 | C | 73   | 4.29E-03 | 2.48E-02 |
| 11 | 5629 | F3 vs. S3 | - | Metabolism  | Catabolism    | modification-dependent macromolecule catabolic process      | GO:0043632 | P | 314  | 4.88E-03 | 4.14E-02 |
| 11 | 5630 | F3 vs. S3 | - | Metabolism  | Catabolism    | peptidase complex                                           | GO:1905368 | C | 60   | 1.02E-02 | 4.95E-02 |
| 11 | 5631 | F3 vs. S3 | - | Metabolism  | Catabolism    | protein-containing complex                                  | GO:0032991 | C | 1905 | 0.00E+00 | 0.00E+00 |
| 11 | 5632 | F3 vs. S3 | - | Metabolism  | Catabolism    | ubiquitin conjugating enzyme activity                       | GO:0061631 | F | 30   | 3.09E-04 | 6.74E-03 |
| 11 | 5633 | F3 vs. S3 | - | Metabolism  | Catabolism    | ubiquitin-like protein conjugating enzyme activity          | GO:0061650 | F | 31   | 3.07E-04 | 6.74E-03 |
| 11 | 5634 | F3 vs. S3 | - | Metabolism  | Metabolism    | acetyltransferase complex                                   | GO:1902493 | C | 32   | 7.11E-03 | 3.69E-02 |
| 11 | 5635 | F3 vs. S3 | - | Metabolism  | Metabolism    | amide biosynthetic process                                  | GO:0043604 | P | 415  | 0.00E+00 | 0.00E+00 |
| 11 | 5636 | F3 vs. S3 | - | Metabolism  | Metabolism    | binding                                                     | GO:0005488 | F | 6104 | 7.55E-04 | 1.40E-02 |
| 11 | 5637 | F3 vs. S3 | - | Metabolism  | Metabolism    | catalytic activity, acting on DNA                           | GO:0140097 | F | 110  | 3.19E-06 | 1.22E-04 |
| 11 | 5638 | F3 vs. S3 | - | Metabolism  | Metabolism    | catalytic complex                                           | GO:1902494 | C | 721  | 6.40E-11 | 1.51E-09 |
| 11 | 5639 | F3 vs. S3 | - | Metabolism  | Metabolism    | cellular amide metabolic process                            | GO:0043603 | P | 504  | 5.97E-14 | 6.57E-12 |
| 11 | 5640 | F3 vs. S3 | - | Metabolism  | Metabolism    | cellular aromatic compound metabolic process                | GO:0006725 | P | 1594 | 2.22E-04 | 3.28E-03 |
| 11 | 5641 | F3 vs. S3 | - | Metabolism  | Metabolism    | cellular macromolecule biosynthetic process                 | GO:0034645 | P | 846  | 0.00E+00 | 0.00E+00 |
| 11 | 5642 | F3 vs. S3 | - | Metabolism  | Metabolism    | cellular macromolecule metabolic process                    | GO:0044260 | P | 2704 | 9.54E-09 | 4.32E-07 |
| 11 | 5643 | F3 vs. S3 | - | Metabolism  | Metabolism    | cellular nitrogen compound biosynthetic process             | GO:0044271 | P | 836  | 9.51E-10 | 5.39E-08 |
| 11 | 5644 | F3 vs. S3 | - | Metabolism  | Metabolism    | cellular nitrogen compound metabolic process                | GO:0034641 | P | 1844 | 0.00E+00 | 0.00E+00 |
| 11 | 5645 | F3 vs. S3 | - | Metabolism  | Metabolism    | cellular protein localization                               | GO:0034613 | P | 450  | 3.19E-03 | 2.92E-02 |
| 11 | 5646 | F3 vs. S3 | - | Metabolism  | Metabolism    | cellular protein metabolic process                          | GO:0044267 | P | 2073 | 1.99E-05 | 3.94E-04 |
| 11 | 5647 | F3 vs. S3 | - | Metabolism  | Metabolism    | cellular protein-containing complex assembly                | GO:0034622 | P | 333  | 1.59E-14 | 1.89E-12 |
| 11 | 5648 | F3 vs. S3 | - | Metabolism  | Metabolism    | chromatin binding                                           | GO:0003682 | F | 107  | 2.07E-04 | 4.96E-03 |
| 11 | 5649 | F3 vs. S3 | - | Metabolism  | Metabolism    | DNA binding                                                 | GO:0003677 | F | 905  | 1.22E-15 | 2.95E-13 |
| 11 | 5650 | F3 vs. S3 | - | Metabolism  | Metabolism    | DNA metabolic process                                       | GO:0006259 | P | 256  | 1.11E-15 | 1.48E-13 |
| 11 | 5651 | F3 vs. S3 | - | Metabolism  | Metabolism    | DNA N-glycosylase activity                                  | GO:0019104 | F | 10   | 3.31E-03 | 4.99E-02 |
| 11 | 5652 | F3 vs. S3 | - | Metabolism  | Metabolism    | DNA secondary structure binding                             | GO:0000217 | F | 24   | 3.11E-03 | 4.78E-02 |
| 11 | 5653 | F3 vs. S3 | - | Metabolism  | Metabolism    | double-stranded DNA binding                                 | GO:0003690 | F | 465  | 1.01E-06 | 4.43E-05 |
| 11 | 5654 | F3 vs. S3 | - | Metabolism  | Metabolism    | GPI anchor biosynthetic process                             | GO:0006506 | P | 19   | 5.22E-03 | 4.37E-02 |
| 11 | 5655 | F3 vs. S3 | - | Metabolism  | Metabolism    | heterocycle metabolic process                               | GO:0046483 | P | 1498 | 2.16E-07 | 7.48E-06 |
| 11 | 5656 | F3 vs. S3 | - | Metabolism  | Metabolism    | heterocyclic compound binding                               | GO:1901363 | F | 2891 | 2.41E-08 | 1.59E-06 |
| 11 | 5657 | F3 vs. S3 | - | Metabolism  | Metabolism    | macromolecule biosynthetic process                          | GO:0009059 | P | 888  | 0.00E+00 | 0.00E+00 |
| 11 | 5658 | F3 vs. S3 | - | Metabolism  | Metabolism    | macromolecule metabolic process                             | GO:0043170 | P | 3386 | 3.20E-10 | 2.01E-08 |
| 11 | 5659 | F3 vs. S3 | - | Metabolism  | Metabolism    | microtubule binding                                         | GO:0008017 | F | 109  | 2.19E-10 | 1.87E-08 |
| 11 | 5660 | F3 vs. S3 | - | Metabolism  | Metabolism    | microtubule minus-end binding                               | GO:0051011 | F | 8    | 2.52E-03 | 3.94E-02 |
| 11 | 5661 | F3 vs. S3 | - | Metabolism  | Metabolism    | microtubule polymerization or depolymerization              | GO:0031109 | P | 15   | 2.13E-05 | 4.20E-04 |
| 11 | 5662 | F3 vs. S3 | - | Metabolism  | Metabolism    | motor activity                                              | GO:0003774 | F | 60   | 8.13E-04 | 1.49E-02 |
| 11 | 5663 | F3 vs. S3 | - | Metabolism  | Metabolism    | nitrogen compound metabolic process                         | GO:0006807 | P | 3812 | 2.45E-03 | 2.39E-02 |



|    |      |           |   |            |                      |                                                                         |            |   |      |          |          |
|----|------|-----------|---|------------|----------------------|-------------------------------------------------------------------------|------------|---|------|----------|----------|
| 11 | 5664 | F3 vs. S3 | - | Metabolism | Metabolism           | nucleic acid binding                                                    | GO:0003676 | F | 2011 | 0.00E+00 | 0.00E+00 |
| 11 | 5665 | F3 vs. S3 | - | Metabolism | Metabolism           | organic cyclic compound binding                                         | GO:0097159 | F | 2911 | 1.59E-08 | 1.07E-06 |
| 11 | 5666 | F3 vs. S3 | - | Metabolism | Metabolism           | organic cyclic compound metabolic process                               | GO:1901360 | P | 1653 | 3.51E-04 | 4.87E-03 |
| 11 | 5667 | F3 vs. S3 | - | Metabolism | Metabolism           | peptide metabolic process                                               | GO:0006518 | P | 410  | 0.00E+00 | 0.00E+00 |
| 11 | 5668 | F3 vs. S3 | - | Metabolism | Metabolism           | protein binding                                                         | GO:0005515 | F | 3507 | 4.95E-05 | 1.45E-03 |
| 11 | 5669 | F3 vs. S3 | - | Metabolism | Metabolism           | protein metabolic process                                               | GO:0019538 | P | 2159 | 2.27E-04 | 3.33E-03 |
| 11 | 5670 | F3 vs. S3 | - | Metabolism | Metabolism           | pseudouridine synthesis                                                 | GO:0001522 | P | 18   | 1.85E-03 | 1.94E-02 |
| 11 | 5671 | F3 vs. S3 | - | Metabolism | Metabolism           | Sm-like protein family complex                                          | GO:0120114 | C | 59   | 2.89E-10 | 6.24E-09 |
| 11 | 5672 | F3 vs. S3 | - | Metabolism | Metabolism           | supramolecular complex                                                  | GO:0099080 | C | 169  | 1.65E-07 | 2.72E-06 |
| 11 | 5673 | F3 vs. S3 | - | Metabolism | Metabolism           | supramolecular fiber                                                    | GO:0099512 | C | 111  | 7.00E-08 | 1.20E-06 |
| 11 | 5674 | F3 vs. S3 | - | Metabolism | Metabolism           | supramolecular polymer                                                  | GO:0099081 | C | 111  | 7.00E-08 | 1.24E-06 |
| 11 | 5675 | F3 vs. S3 | - | Metabolism | Metabolism           | transferase complex                                                     | GO:1990234 | C | 423  | 1.78E-06 | 2.53E-05 |
|    |      |           |   |            |                      |                                                                         |            |   |      |          |          |
| 11 | 5676 | F3 vs. S3 | - | Metabolism | Metabolism           | transferase complex, transferring phosphorus-containing groups          | GO:0061695 | C | 136  | 4.18E-08 | 8.14E-07 |
| 11 | 5677 | F3 vs. S3 | - | Metabolism | Metabolism           | tubulin binding                                                         | GO:0015631 | F | 117  | 8.55E-11 | 7.75E-09 |
| 11 | 5678 | F3 vs. S3 | - | Metabolism | Photosynthesis       | plastid ribosome                                                        | GO:0009547 | C | 18   | 7.13E-05 | 7.14E-04 |
| 11 | 5679 | F3 vs. S3 | - | Metabolism | Photosynthesis       | plastid small ribosomal subunit                                         | GO:0000312 | C | 10   | 1.86E-03 | 1.20E-02 |
| 11 | 5680 | F3 vs. S3 | - | Metabolism | Transporters         | cellular macromolecule localization                                     | GO:0070727 | P | 475  | 2.21E-03 | 2.23E-02 |
| 11 | 5681 | F3 vs. S3 | - | Metabolism | Transporters         | kinesin complex                                                         | GO:0005871 | C | 25   | 5.87E-05 | 6.07E-04 |
| 11 | 5682 | F3 vs. S3 | - | Metabolism | Transporters         | nuclear export                                                          | GO:0051168 | P | 46   | 8.94E-04 | 1.07E-02 |
| 11 | 5683 | F3 vs. S3 | - | Metabolism | Transporters         | nuclear microtubule                                                     | GO:0005880 | C | 8    | 8.35E-03 | 4.27E-02 |
| 11 | 5684 | F3 vs. S3 | - | Metabolism | Transporters         | nuclear transport                                                       | GO:0051169 | P | 78   | 8.87E-04 | 1.07E-02 |
| 11 | 5685 | F3 vs. S3 | - | Metabolism | Transporters         | nucleic acid transport                                                  | GO:0050657 | P | 48   | 3.37E-04 | 4.71E-03 |
| 11 | 5686 | F3 vs. S3 | - | Metabolism | Transporters         | nucleocytoplasmic transport                                             | GO:0006913 | P | 78   | 8.87E-04 | 1.07E-02 |
| 11 | 5687 | F3 vs. S3 | - | Metabolism | Transporters         | protein export from nucleus                                             | GO:0006611 | P | 42   | 2.50E-03 | 2.43E-02 |
| 11 | 5688 | F3 vs. S3 | - | Metabolism | Transporters         | protein localization                                                    | GO:0008104 | P | 501  | 2.04E-03 | 2.09E-02 |
| 11 | 5689 | F3 vs. S3 | - | Metabolism | Transporters         | protein localization to organelle                                       | GO:0033365 | P | 217  | 1.13E-03 | 1.31E-02 |
| 11 | 5690 | F3 vs. S3 | - | Metabolism | Transporters         | RNA transport                                                           | GO:0050658 | P | 48   | 3.37E-04 | 4.72E-03 |
| 11 | 5691 | F3 vs. S3 | - | Regulation | Protein modification | methylation                                                             | GO:0032259 | P | 141  | 1.21E-04 | 1.92E-03 |
| 11 | 5692 | F3 vs. S3 | - | Regulation | Protein modification | positive regulation of histone H3-K27 methylation                       | GO:0061087 | P | 6    | 5.56E-03 | 4.61E-02 |
| 11 | 5693 | F3 vs. S3 | - | Regulation | Protein modification | positive regulation of kinase activity                                  | GO:0033674 | P | 13   | 1.14E-03 | 1.31E-02 |
| 11 | 5694 | F3 vs. S3 | - | Regulation | Protein modification | prefoldin complex                                                       | GO:0016272 | C | 7    | 8.29E-03 | 4.26E-02 |
| 11 | 5695 | F3 vs. S3 | - | Regulation | Protein modification | protein alkylation                                                      | GO:0008213 | P | 58   | 3.72E-04 | 5.08E-03 |
| 11 | 5696 | F3 vs. S3 | - | Regulation | Protein modification | protein dimerization activity                                           | GO:0046983 | F | 357  | 4.72E-04 | 9.50E-03 |
| 11 | 5697 | F3 vs. S3 | - | Regulation | Protein modification | protein heterodimerization activity                                     | GO:0046982 | F | 79   | 3.70E-06 | 1.37E-04 |
| 11 | 5698 | F3 vs. S3 | - | Regulation | Protein modification | protein methylation                                                     | GO:0006479 | P | 58   | 3.72E-04 | 5.09E-03 |
| 11 | 5699 | F3 vs. S3 | - | Regulation | Protein modification | regulation of catalytic activity                                        | GO:0050790 | P | 181  | 1.84E-04 | 2.80E-03 |
| 11 | 5700 | F3 vs. S3 | - | Regulation | Protein modification | regulation of histone methylation                                       | GO:0031060 | P | 21   | 5.75E-03 | 4.74E-02 |
| 11 | 5701 | F3 vs. S3 | - | Regulation | Protein modification | regulation of protein metabolic process                                 | GO:0051246 | P | 252  | 7.52E-06 | 1.80E-04 |
| 11 | 5702 | F3 vs. S3 | - | Regulation | Protein modification | peptidyl-lysine modification                                            | GO:0018205 | P | 84   | 6.81E-04 | 8.50E-03 |
| 11 | 5703 | F3 vs. S3 | - | Regulation | Protein modification | positive regulation of protein modification process                     | GO:0031401 | P | 38   | 4.60E-04 | 6.13E-03 |
| 11 | 5704 | F3 vs. S3 | - | Regulation | Protein modification | protein-containing complex assembly                                     | GO:0065003 | P | 372  | 1.76E-11 | 1.31E-09 |
| 11 | 5705 | F3 vs. S3 | - | Regulation | Protein modification | protein-containing complex localization                                 | GO:0031503 | P | 48   | 6.11E-04 | 7.83E-03 |
| 11 | 5706 | F3 vs. S3 | - | Regulation | Protein modification | protein-containing complex subunit organization                         | GO:0043933 | P | 419  | 3.86E-11 | 2.67E-09 |
| 11 | 5707 | F3 vs. S3 | - | Regulation | Protein modification | regulation of protein modification process                              | GO:0031399 | P | 123  | 5.96E-07 | 1.93E-05 |
| 11 | 5708 | F3 vs. S3 | - | Regulation | Regulation           | biological regulation                                                   | GO:0065007 | P | 3498 | 1.05E-05 | 2.36E-04 |
| 11 | 5709 | F3 vs. S3 | - | Regulation | Regulation           | molecular function regulator                                            | GO:0098772 | F | 1291 | 5.50E-10 | 4.56E-08 |
| 11 | 5710 | F3 vs. S3 | - | Regulation | Regulation           | negative regulation of biological process                               | GO:0048519 | P | 712  | 3.90E-07 | 1.31E-05 |
| 11 | 5711 | F3 vs. S3 | - | Regulation | Regulation           | negative regulation of biosynthetic process                             | GO:0009890 | P | 222  | 3.16E-05 | 5.81E-04 |
| 11 | 5712 | F3 vs. S3 | - | Regulation | Regulation           | negative regulation of cellular biosynthetic process                    | GO:0031327 | P | 216  | 1.47E-05 | 3.10E-04 |
|    |      |           |   |            |                      |                                                                         |            |   |      |          |          |
| 11 | 5713 | F3 vs. S3 | - | Regulation | Regulation           | negative regulation of cellular macromolecule biosynthetic process      | GO:2000113 | P | 203  | 7.93E-06 | 1.86E-04 |
| 11 | 5714 | F3 vs. S3 | - | Regulation | Regulation           | negative regulation of cellular metabolic process                       | GO:0031324 | P | 290  | 8.77E-06 | 2.04E-04 |
| 11 | 5715 | F3 vs. S3 | - | Regulation | Regulation           | negative regulation of cellular process                                 | GO:0048523 | P | 473  | 6.57E-07 | 2.12E-05 |
| 11 | 5716 | F3 vs. S3 | - | Regulation | Regulation           | negative regulation of DNA metabolic process                            | GO:0051053 | P | 14   | 3.79E-03 | 3.36E-02 |
| 11 | 5717 | F3 vs. S3 | - | Regulation | Regulation           | negative regulation of macromolecule biosynthetic process               | GO:0010558 | P | 205  | 6.89E-06 | 1.66E-04 |
| 11 | 5718 | F3 vs. S3 | - | Regulation | Regulation           | negative regulation of macromolecule metabolic process                  | GO:0010605 | P | 370  | 6.87E-10 | 3.93E-08 |
| 11 | 5719 | F3 vs. S3 | - | Regulation | Regulation           | negative regulation of metabolic process                                | GO:0009892 | P | 406  | 1.16E-08 | 4.99E-07 |
| 11 | 5720 | F3 vs. S3 | - | Regulation | Regulation           | negative regulation of nitrogen compound metabolic process              | GO:0051172 | P | 254  | 1.71E-06 | 4.86E-05 |
|    |      |           |   |            |                      |                                                                         |            |   |      |          |          |
| 11 | 5721 | F3 vs. S3 | - | Regulation | Regulation           | negative regulation of nucleobase-containing compound metabolic process | GO:0045934 | P | 185  | 1.49E-06 | 4.38E-05 |
| 11 | 5722 | F3 vs. S3 | - | Regulation | Regulation           | positive regulation of biological process                               | GO:0048518 | P | 787  | 6.66E-04 | 8.39E-03 |
| 11 | 5723 | F3 vs. S3 | - | Regulation | Regulation           | positive regulation of biosynthetic process                             | GO:0009891 | P | 363  | 2.01E-03 | 2.07E-02 |
| 11 | 5724 | F3 vs. S3 | - | Regulation | Regulation           | positive regulation of cellular biosynthetic process                    | GO:0031328 | P | 354  | 2.05E-03 | 2.09E-02 |



|    |      |           |   |            |               |                                                                          |            |   |      |          |          |
|----|------|-----------|---|------------|---------------|--------------------------------------------------------------------------|------------|---|------|----------|----------|
| 11 | 5725 | F3 vs. S3 | - | Regulation | Regulation    | positive regulation of cellular metabolic process                        | GO:0031325 | P | 472  | 1.23E-04 | 1.94E-03 |
| 11 | 5726 | F3 vs. S3 | - | Regulation | Regulation    | positive regulation of cellular process                                  | GO:0048522 | P | 636  | 4.40E-04 | 5.89E-03 |
| 11 | 5727 | F3 vs. S3 | - | Regulation | Regulation    | positive regulation of macromolecule biosynthetic process                | GO:0010557 | P | 328  | 2.24E-04 | 3.30E-03 |
| 11 | 5728 | F3 vs. S3 | - | Regulation | Regulation    | positive regulation of macromolecule metabolic process                   | GO:0010604 | P | 449  | 5.87E-06 | 1.43E-04 |
| 11 | 5729 | F3 vs. S3 | - | Regulation | Regulation    | positive regulation of metabolic process                                 | GO:0009893 | P | 508  | 8.29E-05 | 1.38E-03 |
| 11 | 5730 | F3 vs. S3 | - | Regulation | Regulation    | positive regulation of nitrogen compound metabolic process               | GO:0051173 | P | 430  | 9.13E-05 | 1.48E-03 |
| 11 | 5731 | F3 vs. S3 | - | Regulation | Regulation    | positive regulation of nucleobase-containing compound metabolic process  | GO:0045935 | P | 323  | 4.34E-04 | 5.84E-03 |
| 11 | 5732 | F3 vs. S3 | - | Regulation | Regulation    | regulation of biological process                                         | GO:0050789 | P | 3145 | 5.62E-09 | 2.65E-07 |
| 11 | 5733 | F3 vs. S3 | - | Regulation | Regulation    | regulation of biosynthetic process                                       | GO:0009889 | P | 1395 | 4.21E-13 | 4.14E-11 |
| 11 | 5734 | F3 vs. S3 | - | Regulation | Regulation    | regulation of cellular biosynthetic process                              | GO:0031326 | P | 1375 | 2.09E-14 | 2.39E-12 |
| 11 | 5735 | F3 vs. S3 | - | Regulation | Regulation    | regulation of cellular component organization                            | GO:0051128 | P | 255  | 2.72E-03 | 2.61E-02 |
| 11 | 5736 | F3 vs. S3 | - | Regulation | Regulation    | regulation of cellular macromolecule biosynthetic process                | GO:2000112 | P | 1297 | 1.11E-16 | 1.68E-14 |
| 11 | 5737 | F3 vs. S3 | - | Regulation | Regulation    | regulation of cellular metabolic process                                 | GO:0031323 | P | 1709 | 1.33E-15 | 1.74E-13 |
| 11 | 5738 | F3 vs. S3 | - | Regulation | Regulation    | regulation of cellular process                                           | GO:0050794 | P | 2736 | 2.14E-09 | 1.13E-07 |
| 11 | 5739 | F3 vs. S3 | - | Regulation | Regulation    | regulation of cellular protein metabolic process                         | GO:0032268 | P | 239  | 2.16E-05 | 4.24E-04 |
| 11 | 5740 | F3 vs. S3 | - | Regulation | Regulation    | regulation of flower development                                         | GO:0009909 | P | 118  | 1.46E-04 | 2.27E-03 |
| 11 | 5741 | F3 vs. S3 | - | Regulation | Regulation    | regulation of macromolecule biosynthetic process                         | GO:0010556 | P | 1301 | 0.00E+00 | 0.00E+00 |
| 11 | 5742 | F3 vs. S3 | - | Regulation | Regulation    | regulation of macromolecule metabolic process                            | GO:0060255 | P | 1731 | 0.00E+00 | 0.00E+00 |
| 11 | 5743 | F3 vs. S3 | - | Regulation | Regulation    | regulation of metabolic process                                          | GO:0019222 | P | 1925 | 1.11E-16 | 1.89E-14 |
| 11 | 5744 | F3 vs. S3 | - | Regulation | Regulation    | regulation of microtubule cytoskeleton organization                      | GO:0070507 | P | 15   | 3.51E-03 | 3.14E-02 |
| 11 | 5745 | F3 vs. S3 | - | Regulation | Regulation    | regulation of microtubule-based process                                  | GO:0032886 | P | 15   | 3.51E-03 | 3.15E-02 |
| 11 | 5746 | F3 vs. S3 | - | Regulation | Regulation    | regulation of molecular function                                         | GO:0065009 | P | 214  | 6.98E-04 | 8.66E-03 |
| 11 | 5747 | F3 vs. S3 | - | Regulation | Regulation    | regulation of multicellular organismal development                       | GO:2000026 | P | 248  | 3.20E-03 | 2.92E-02 |
| 11 | 5748 | F3 vs. S3 | - | Regulation | Regulation    | regulation of nitrogen compound metabolic process                        | GO:0051171 | P | 1542 | 0.00E+00 | 0.00E+00 |
| 11 | 5749 | F3 vs. S3 | - | Regulation | Regulation    | regulation of nucleobase-containing compound metabolic process           | GO:0019219 | P | 1289 | 0.00E+00 | 0.00E+00 |
| 11 | 5750 | F3 vs. S3 | - | Regulation | Regulation    | regulation of organelle organization                                     | GO:0033043 | P | 136  | 1.41E-06 | 4.15E-05 |
| 11 | 5751 | F3 vs. S3 | - | Regulation | Regulation    | regulation of phosphate metabolic process                                | GO:0019220 | P | 101  | 7.68E-06 | 1.82E-04 |
| 11 | 5752 | F3 vs. S3 | - | Regulation | Regulation    | regulation of phosphorus metabolic process                               | GO:0051174 | P | 102  | 1.36E-05 | 2.96E-04 |
| 11 | 5753 | F3 vs. S3 | - | Regulation | Regulation    | regulation of primary metabolic process                                  | GO:0080090 | P | 1595 | 0.00E+00 | 0.00E+00 |
| 11 | 5754 | F3 vs. S3 | - | Regulation | Regulation    | regulation of shoot system development                                   | GO:0048831 | P | 125  | 5.97E-04 | 7.67E-03 |
| 11 | 5755 | F3 vs. S3 | - | Regulation | Regulation    | regulation of transferase activity                                       | GO:0051338 | P | 64   | 4.62E-07 | 1.53E-05 |
| 11 | 5756 | F3 vs. S3 | - | Regulation | Transcription | ATP-dependent chromatin remodeling                                       | GO:0043044 | P | 18   | 2.23E-03 | 2.25E-02 |
| 11 | 5757 | F3 vs. S3 | - | Regulation | Transcription | chromatin organization involved in negative regulation of transcription  | GO:0097549 | P | 46   | 4.93E-06 | 1.25E-04 |
| 11 | 5758 | F3 vs. S3 | - | Regulation | Transcription | chromatin organization involved in regulation of transcription           | GO:0034401 | P | 47   | 2.29E-06 | 6.31E-05 |
| 11 | 5759 | F3 vs. S3 | - | Regulation | Transcription | chromatin remodeling                                                     | GO:0006338 | P | 54   | 8.56E-05 | 1.42E-03 |
| 11 | 5760 | F3 vs. S3 | - | Regulation | Transcription | chromatin silencing                                                      | GO:0006342 | P | 29   | 2.32E-06 | 6.36E-05 |
| 11 | 5761 | F3 vs. S3 | - | Regulation | Transcription | covalent chromatin modification                                          | GO:0016569 | P | 98   | 8.74E-05 | 1.43E-03 |
| 11 | 5762 | F3 vs. S3 | - | Regulation | Transcription | DNA conformation change                                                  | GO:0071103 | P | 86   | 8.01E-07 | 2.54E-05 |
| 11 | 5763 | F3 vs. S3 | - | Regulation | Transcription | DNA-binding transcription activator activity, RNA polymerase II-specific | GO:0001228 | F | 21   | 1.43E-03 | 2.47E-02 |
| 11 | 5764 | F3 vs. S3 | - | Regulation | Transcription | DNA-binding transcription factor activity                                | GO:0003700 | F | 888  | 3.30E-08 | 2.12E-06 |
| 11 | 5765 | F3 vs. S3 | - | Regulation | Transcription | DNA-binding transcription factor activity, RNA polymerase II-specific    | GO:0000981 | F | 176  | 6.28E-04 | 1.22E-02 |
| 11 | 5766 | F3 vs. S3 | - | Regulation | Transcription | DNA-directed RNA polymerase complex                                      | GO:0000428 | C | 74   | 7.81E-04 | 5.74E-03 |
| 11 | 5767 | F3 vs. S3 | - | Regulation | Transcription | dsRNA processing                                                         | GO:0031050 | P | 42   | 3.05E-03 | 2.82E-02 |
| 11 | 5768 | F3 vs. S3 | - | Regulation | Transcription | gene expression                                                          | GO:0010467 | P | 1051 | 0.00E+00 | 0.00E+00 |
| 11 | 5769 | F3 vs. S3 | - | Regulation | Transcription | gene silencing                                                           | GO:0016458 | P | 113  | 3.63E-08 | 1.43E-06 |
| 11 | 5770 | F3 vs. S3 | - | Regulation | Transcription | gene silencing by RNA                                                    | GO:0031047 | P | 78   | 1.42E-05 | 3.01E-04 |
| 11 | 5771 | F3 vs. S3 | - | Regulation | Transcription | gene silencing by RNA-directed DNA methylation                           | GO:0080188 | P | 18   | 2.95E-03 | 2.74E-02 |
| 11 | 5772 | F3 vs. S3 | - | Regulation | Transcription | H4 histone acetyltransferase complex                                     | GO:1902562 | C | 11   | 6.23E-03 | 3.40E-02 |
| 11 | 5773 | F3 vs. S3 | - | Regulation | Transcription | H4/H2A histone acetyltransferase complex                                 | GO:0043189 | C | 10   | 6.68E-03 | 3.52E-02 |
| 11 | 5774 | F3 vs. S3 | - | Regulation | Transcription | histone binding                                                          | GO:0042393 | F | 68   | 2.98E-05 | 9.50E-04 |
| 11 | 5775 | F3 vs. S3 | - | Regulation | Transcription | histone methylation                                                      | GO:0016571 | P | 41   | 2.31E-03 | 2.31E-02 |
| 11 | 5776 | F3 vs. S3 | - | Regulation | Transcription | histone modification                                                     | GO:0016570 | P | 94   | 1.85E-04 | 2.80E-03 |
| 11 | 5777 | F3 vs. S3 | - | Regulation | Transcription | macromolecule methylation                                                | GO:0043414 | P | 110  | 2.97E-06 | 7.90E-05 |
| 11 | 5778 | F3 vs. S3 | - | Regulation | Transcription | mediator complex                                                         | GO:0016592 | C | 26   | 1.19E-03 | 8.24E-03 |
| 11 | 5779 | F3 vs. S3 | - | Regulation | Transcription | mRNA processing                                                          | GO:0006397 | P | 193  | 1.54E-07 | 5.47E-06 |
| 11 | 5780 | F3 vs. S3 | - | Regulation | Transcription | negative regulation of gene expression                                   | GO:0010629 | P | 304  | 4.21E-08 | 1.62E-06 |
| 11 | 5781 | F3 vs. S3 | - | Regulation | Transcription | negative regulation of gene expression, epigenetic                       | GO:0045814 | P | 33   | 8.99E-06 | 2.08E-04 |
| 11 | 5782 | F3 vs. S3 | - | Regulation | Transcription | negative regulation of nucleic acid-templated transcription              | GO:1903507 | P | 163  | 1.97E-05 | 3.93E-04 |
| 11 | 5783 | F3 vs. S3 | - | Regulation | Transcription | negative regulation of RNA biosynthetic process                          | GO:1902679 | P | 163  | 1.97E-05 | 3.95E-04 |

|    |      |           |   |            |               |                                                                                                                                                     |            |   |      |          |          |
|----|------|-----------|---|------------|---------------|-----------------------------------------------------------------------------------------------------------------------------------------------------|------------|---|------|----------|----------|
| 11 | 5784 | F3 vs. S3 | - | Regulation | Transcription | negative regulation of transcription, DNA-templated                                                                                                 | GO:0045892 | P | 161  | 2.27E-05 | 4.40E-04 |
| 11 | 5785 | F3 vs. S3 | - | Regulation | Transcription | NuA4 histone acetyltransferase complex                                                                                                              | GO:0035267 | C | 10   | 6.68E-03 | 3.51E-02 |
| 11 | 5786 | F3 vs. S3 | - | Regulation | Transcription | nuclear DNA-directed RNA polymerase complex                                                                                                         | GO:0055029 | C | 66   | 8.12E-05 | 7.60E-04 |
| 11 | 5787 | F3 vs. S3 | - | Regulation | Transcription | nuclear speck                                                                                                                                       | GO:0016607 | C | 46   | 1.09E-03 | 7.79E-03 |
| 11 | 5788 | F3 vs. S3 | - | Regulation | Transcription | nucleic acid-templated transcription                                                                                                                | GO:0097659 | P | 151  | 1.36E-05 | 2.95E-04 |
| 11 | 5789 | F3 vs. S3 | - | Regulation | Transcription | nucleolus                                                                                                                                           | GO:0005730 | C | 338  | 0.00E+00 | 0.00E+00 |
| 11 | 5790 | F3 vs. S3 | - | Regulation | Transcription | nucleosome organization                                                                                                                             | GO:0034728 | P | 41   | 3.46E-06 | 8.98E-05 |
| 11 | 5791 | F3 vs. S3 | - | Regulation | Transcription | positive regulation of chromatin organization                                                                                                       | GO:1905269 | P | 16   | 3.06E-03 | 2.82E-02 |
| 11 | 5792 | F3 vs. S3 | - | Regulation | Transcription | positive regulation of chromosome organization                                                                                                      | GO:2001252 | P | 18   | 5.71E-04 | 7.38E-03 |
| 11 | 5793 | F3 vs. S3 | - | Regulation | Transcription | positive regulation of gene expression                                                                                                              | GO:0010628 | P | 346  | 3.53E-04 | 4.88E-03 |
| 11 | 5794 | F3 vs. S3 | - | Regulation | Transcription | positive regulation of histone methylation                                                                                                          | GO:0031062 | P | 13   | 1.93E-03 | 2.00E-02 |
| 11 | 5795 | F3 vs. S3 | - | Regulation | Transcription | positive regulation of histone modification                                                                                                         | GO:0031058 | P | 15   | 2.01E-03 | 2.07E-02 |
| 11 | 5796 | F3 vs. S3 | - | Regulation | Transcription | positive regulation of nucleic acid-templated transcription                                                                                         | GO:1903508 | P | 292  | 1.11E-03 | 1.29E-02 |
| 11 | 5797 | F3 vs. S3 | - | Regulation | Transcription | positive regulation of RNA biosynthetic process                                                                                                     | GO:1902680 | P | 292  | 1.11E-03 | 1.29E-02 |
| 11 | 5798 | F3 vs. S3 | - | Regulation | Transcription | positive regulation of transcription by RNA polymerase II                                                                                           | GO:0045944 | P | 108  | 1.02E-03 | 1.22E-02 |
| 11 | 5799 | F3 vs. S3 | - | Regulation | Transcription | positive regulation of transcription, DNA-templated                                                                                                 | GO:0045893 | P | 290  | 9.08E-04 | 1.09E-02 |
| 11 | 5800 | F3 vs. S3 | - | Regulation | Transcription | post-transcriptional gene silencing by RNA                                                                                                          | GO:0035194 | P | 54   | 6.82E-04 | 8.50E-03 |
| 11 | 5801 | F3 vs. S3 | - | Regulation | Transcription | pre-transcriptional gene silencing by RNA                                                                                                           | GO:0140458 | P | 18   | 2.95E-03 | 2.75E-02 |
| 11 | 5802 | F3 vs. S3 | - | Regulation | Transcription | production of small RNA involved in gene silencing by RNA                                                                                           | GO:0070918 | P | 42   | 3.05E-03 | 2.82E-02 |
| 11 | 5803 | F3 vs. S3 | - | Regulation | Transcription | protein acetyltransferase complex                                                                                                                   | GO:0031248 | C | 32   | 7.11E-03 | 3.67E-02 |
| 11 | 5804 | F3 vs. S3 | - | Regulation | Transcription | protein-DNA complex                                                                                                                                 | GO:0032993 | C | 35   | 4.83E-05 | 5.15E-04 |
| 11 | 5805 | F3 vs. S3 | - | Regulation | Transcription | protein-DNA complex assembly                                                                                                                        | GO:0065004 | P | 54   | 7.62E-08 | 2.87E-06 |
| 11 | 5806 | F3 vs. S3 | - | Regulation | Transcription | protein-DNA complex subunit organization                                                                                                            | GO:0071824 | P | 64   | 2.48E-08 | 1.04E-06 |
| 11 | 5807 | F3 vs. S3 | - | Regulation | Transcription | regulation of DNA methylation                                                                                                                       | GO:0044030 | P | 12   | 1.64E-03 | 1.74E-02 |
| 11 | 5808 | F3 vs. S3 | - | Regulation | Transcription | regulation of gene expression                                                                                                                       | GO:0010468 | P | 1499 | 0.00E+00 | 0.00E+00 |
| 11 | 5809 | F3 vs. S3 | - | Regulation | Transcription | regulation of gene expression, epigenetic                                                                                                           | GO:0040029 | P | 57   | 2.95E-06 | 7.91E-05 |
| 11 | 5810 | F3 vs. S3 | - | Regulation | Transcription | regulation of gene silencing                                                                                                                        | GO:0060968 | P | 36   | 4.10E-03 | 3.60E-02 |
| 11 | 5811 | F3 vs. S3 | - | Regulation | Transcription | regulation of nucleic acid-templated transcription                                                                                                  | GO:1903506 | P | 1176 | 1.11E-16 | 1.60E-14 |
| 11 | 5812 | F3 vs. S3 | - | Regulation | Transcription | regulation of RNA biosynthetic process                                                                                                              | GO:2001141 | P | 1177 | 1.11E-16 | 1.83E-14 |
| 11 | 5813 | F3 vs. S3 | - | Regulation | Transcription | regulation of transcription by RNA polymerase II                                                                                                    | GO:0006357 | P | 272  | 3.49E-06 | 9.02E-05 |
| 11 | 5814 | F3 vs. S3 | - | Regulation | Transcription | regulation of transcription, DNA-templated                                                                                                          | GO:0006355 | P | 1176 | 1.11E-16 | 1.78E-14 |
| 11 | 5815 | F3 vs. S3 | - | Regulation | Transcription | regulatory region nucleic acid binding                                                                                                              | GO:0001067 | F | 385  | 4.54E-04 | 9.27E-03 |
| 11 | 5816 | F3 vs. S3 | - | Regulation | Transcription | RNA 3'-end processing                                                                                                                               | GO:0031123 | P | 48   | 2.31E-04 | 3.39E-03 |
| 11 | 5817 | F3 vs. S3 | - | Regulation | Transcription | RNA binding                                                                                                                                         | GO:0003723 | F | 1073 | 4.81E-13 | 6.98E-11 |
| 11 | 5818 | F3 vs. S3 | - | Regulation | Transcription | RNA biosynthetic process                                                                                                                            | GO:0032774 | P | 151  | 1.36E-05 | 2.93E-04 |
| 11 | 5819 | F3 vs. S3 | - | Regulation | Transcription | RNA modification                                                                                                                                    | GO:0009451 | P | 166  | 3.60E-05 | 6.59E-04 |
| 11 | 5820 | F3 vs. S3 | - | Regulation | Transcription | RNA polymerase complex                                                                                                                              | GO:0030880 | C | 78   | 1.16E-03 | 8.11E-03 |
| 11 | 5821 | F3 vs. S3 | - | Regulation | Transcription | RNA polymerase II, core complex                                                                                                                     | GO:0005665 | C | 14   | 5.67E-03 | 3.16E-02 |
| 11 | 5822 | F3 vs. S3 | - | Regulation | Transcription | RNA polymerase II, holoenzyme                                                                                                                       | GO:0016591 | C | 44   | 1.92E-03 | 1.22E-02 |
| 11 | 5823 | F3 vs. S3 | - | Regulation | Transcription | RNA polymerase V complex                                                                                                                            | GO:0000419 | C | 14   | 4.64E-03 | 2.64E-02 |
| 11 | 5824 | F3 vs. S3 | - | Regulation | Transcription | sequence-specific DNA binding                                                                                                                       | GO:0043565 | F | 573  | 5.49E-07 | 2.61E-05 |
| 11 | 5825 | F3 vs. S3 | - | Regulation | Transcription | sequence-specific double-stranded DNA binding                                                                                                       | GO:1990837 | F | 403  | 5.97E-05 | 1.71E-03 |
| 11 | 5826 | F3 vs. S3 | - | Regulation | Transcription | transcription by RNA polymerase II                                                                                                                  | GO:0006366 | P | 36   | 4.04E-03 | 3.55E-02 |
| 11 | 5827 | F3 vs. S3 | - | Regulation | Transcription | transcription coregulator activity                                                                                                                  | GO:0003712 | F | 82   | 6.77E-08 | 4.09E-06 |
| 11 | 5828 | F3 vs. S3 | - | Regulation | Transcription | transcription regulator activity                                                                                                                    | GO:0140110 | F | 973  | 3.58E-12 | 3.85E-10 |
| 11 | 5829 | F3 vs. S3 | - | Regulation | Transcription | transcription regulator complex                                                                                                                     | GO:0005667 | C | 68   | 5.45E-04 | 4.10E-03 |
|    |      |           |   |            |               |                                                                                                                                                     |            |   |      |          |          |
| 11 | 5830 | F3 vs. S3 | - | Regulation | Transcription | transcription regulatory region sequence-specific DNA binding                                                                                       | GO:0000976 | F | 385  | 4.54E-04 | 9.21E-03 |
| 11 | 5831 | F3 vs. S3 | - | Regulation | Transcription | transcription, DNA-templated                                                                                                                        | GO:0006351 | P | 151  | 1.36E-05 | 2.92E-04 |
| 11 | 5832 | F3 vs. S3 | - | Regulation | Translation   | 90S preribosome                                                                                                                                     | GO:0030686 | C | 20   | 1.71E-06 | 2.46E-05 |
| 11 | 5833 | F3 vs. S3 | - | Regulation | Translation   | catalytic step 2 spliceosome                                                                                                                        | GO:0071013 | C | 46   | 5.52E-05 | 5.77E-04 |
| 11 | 5834 | F3 vs. S3 | - | Regulation | Translation   | cleavage involved in rRNA processing                                                                                                                | GO:0000469 | P | 16   | 1.67E-03 | 1.77E-02 |
| 11 | 5835 | F3 vs. S3 | - | Regulation | Translation   | cytoplasmic translation                                                                                                                             | GO:0002181 | P | 59   | 2.27E-05 | 4.40E-04 |
| 11 | 5836 | F3 vs. S3 | - | Regulation | Translation   | cytosolic large ribosomal subunit                                                                                                                   | GO:0022625 | C | 108  | 0.00E+00 | 0.00E+00 |
| 11 | 5837 | F3 vs. S3 | - | Regulation | Translation   | cytosolic ribosome                                                                                                                                  | GO:0022626 | C | 240  | 0.00E+00 | 0.00E+00 |
| 11 | 5838 | F3 vs. S3 | - | Regulation | Translation   | cytosolic small ribosomal subunit                                                                                                                   | GO:0022627 | C | 80   | 4.44E-16 | 1.57E-14 |
|    |      |           |   |            |               |                                                                                                                                                     |            |   |      |          |          |
| 11 | 5839 | F3 vs. S3 | - | Regulation | Translation   | endonucleolytic cleavage in ITS1 to separate SSU-rRNA from 5.8S rRNA and LSU-rRNA from tricistronic rRNA transcript (SSU-rRNA, 5.8S rRNA, LSU-rRNA) | GO:0000447 | P | 4    | 1.89E-03 | 1.96E-02 |
| 11 | 5840 | F3 vs. S3 | - | Regulation | Translation   | establishment of RNA localization                                                                                                                   | GO:0051236 | P | 48   | 3.37E-04 | 4.73E-03 |
| 11 | 5841 | F3 vs. S3 | - | Regulation | Translation   | large ribosomal subunit                                                                                                                             | GO:0015934 | C | 137  | 0.00E+00 | 0.00E+00 |
| 11 | 5842 | F3 vs. S3 | - | Regulation | Translation   | large ribosomal subunit rRNA binding                                                                                                                | GO:0070180 | F | 11   | 6.06E-04 | 1.20E-02 |
| 11 | 5843 | F3 vs. S3 | - | Regulation | Translation   | maturation of LSU-rRNA                                                                                                                              | GO:0000470 | P | 32   | 5.10E-04 | 6.66E-03 |
| 11 | 5844 | F3 vs. S3 | - | Regulation | Translation   | maturation of SSU-rRNA                                                                                                                              | GO:0030490 | P | 38   | 1.00E-09 | 5.63E-08 |

|    |      |           |   |            |             |                                                                                          |            |   |      |          |          |
|----|------|-----------|---|------------|-------------|------------------------------------------------------------------------------------------|------------|---|------|----------|----------|
| 11 | 5845 | F3 vs. S3 | - | Regulation | Translation | maturation of SSU-rRNA from tricistronic rRNA transcript (SSU-rRNA, 5.8S rRNA, LSU-rRNA) | GO:0000462 | P | 26   | 1.39E-05 | 2.96E-04 |
| 11 | 5846 | F3 vs. S3 | - | Regulation | Translation | mitochondrial large ribosomal subunit                                                    | GO:0005762 | C | 17   | 1.00E-03 | 7.26E-03 |
| 11 | 5847 | F3 vs. S3 | - | Regulation | Translation | mitochondrial ribosome                                                                   | GO:0005761 | C | 27   | 1.27E-05 | 1.50E-04 |
| 11 | 5848 | F3 vs. S3 | - | Regulation | Translation | mitochondrial small ribosomal subunit                                                    | GO:0005763 | C | 10   | 3.91E-03 | 2.32E-02 |
| 11 | 5849 | F3 vs. S3 | - | Regulation | Translation | mRNA 3'-end processing                                                                   | GO:0031124 | P | 21   | 4.03E-03 | 3.55E-02 |
| 11 | 5850 | F3 vs. S3 | - | Regulation | Translation | mRNA binding                                                                             | GO:0003729 | F | 719  | 6.82E-07 | 3.09E-05 |
| 11 | 5851 | F3 vs. S3 | - | Regulation | Translation | mRNA cis splicing, via spliceosome                                                       | GO:0045292 | P | 28   | 2.40E-03 | 2.38E-02 |
| 11 | 5852 | F3 vs. S3 | - | Regulation | Translation | mRNA cleavage factor complex                                                             | GO:0005849 | C | 11   | 4.96E-03 | 2.80E-02 |
| 11 | 5853 | F3 vs. S3 | - | Regulation | Translation | mRNA export from nucleus                                                                 | GO:0006406 | P | 25   | 5.68E-03 | 4.69E-02 |
| 11 | 5854 | F3 vs. S3 | - | Regulation | Translation | mRNA metabolic process                                                                   | GO:0016071 | P | 280  | 1.15E-07 | 4.26E-06 |
| 11 | 5855 | F3 vs. S3 | - | Regulation | Translation | mRNA modification                                                                        | GO:0016556 | P | 31   | 6.04E-03 | 4.91E-02 |
| 11 | 5856 | F3 vs. S3 | - | Regulation | Translation | mRNA splicing, via spliceosome                                                           | GO:0000398 | P | 141  | 9.22E-06 | 2.12E-04 |
| 11 | 5857 | F3 vs. S3 | - | Regulation | Translation | mRNA transport                                                                           | GO:0051028 | P | 26   | 2.59E-03 | 2.50E-02 |
|    |      |           |   |            |             |                                                                                          |            |   |      |          |          |
| 11 | 5858 | F3 vs. S3 | - | Regulation | Translation | mRNA-containing ribonucleoprotein complex export from nucleus                            | GO:0071427 | P | 25   | 5.68E-03 | 4.70E-02 |
| 11 | 5859 | F3 vs. S3 | - | Regulation | Translation | ncRNA metabolic process                                                                  | GO:0034660 | P | 293  | 3.67E-11 | 2.58E-09 |
| 11 | 5860 | F3 vs. S3 | - | Regulation | Translation | ncRNA processing                                                                         | GO:0034470 | P | 251  | 2.45E-11 | 1.79E-09 |
| 11 | 5861 | F3 vs. S3 | - | Regulation | Translation | negative regulation of RNA metabolic process                                             | GO:0051253 | P | 171  | 2.87E-05 | 5.36E-04 |
| 11 | 5862 | F3 vs. S3 | - | Regulation | Translation | organellar large ribosomal subunit                                                       | GO:0000315 | C | 24   | 1.15E-04 | 1.05E-03 |
| 11 | 5863 | F3 vs. S3 | - | Regulation | Translation | organellar ribosome                                                                      | GO:0000313 | C | 42   | 4.97E-08 | 9.13E-07 |
| 11 | 5864 | F3 vs. S3 | - | Regulation | Translation | organellar small ribosomal subunit                                                       | GO:0000314 | C | 18   | 1.04E-04 | 9.61E-04 |
| 11 | 5865 | F3 vs. S3 | - | Regulation | Translation | peptide biosynthetic process                                                             | GO:0043043 | P | 365  | 0.00E+00 | 0.00E+00 |
| 11 | 5866 | F3 vs. S3 | - | Regulation | Translation | polysomal ribosome                                                                       | GO:0042788 | C | 3    | 8.37E-03 | 4.26E-02 |
| 11 | 5867 | F3 vs. S3 | - | Regulation | Translation | positive regulation of RNA metabolic process                                             | GO:0051254 | P | 310  | 1.10E-03 | 1.29E-02 |
| 11 | 5868 | F3 vs. S3 | - | Regulation | Translation | posttranscriptional gene silencing                                                       | GO:0016441 | P | 59   | 1.45E-03 | 1.59E-02 |
| 11 | 5869 | F3 vs. S3 | - | Regulation | Translation | posttranscriptional regulation of gene expression                                        | GO:0010608 | P | 157  | 4.43E-03 | 3.82E-02 |
| 11 | 5870 | F3 vs. S3 | - | Regulation | Translation | precatalytic spliceosome                                                                 | GO:0071011 | C | 26   | 9.50E-07 | 1.43E-05 |
| 11 | 5871 | F3 vs. S3 | - | Regulation | Translation | preribosome                                                                              | GO:0030684 | C | 65   | 1.50E-09 | 3.17E-08 |
| 11 | 5872 | F3 vs. S3 | - | Regulation | Translation | preribosome, large subunit precursor                                                     | GO:0030687 | C | 17   | 4.74E-03 | 2.69E-02 |
| 11 | 5873 | F3 vs. S3 | - | Regulation | Translation | prespliceosome                                                                           | GO:0071010 | C | 19   | 1.31E-03 | 8.82E-03 |
| 11 | 5874 | F3 vs. S3 | - | Regulation | Translation | regulation of RNA metabolic process                                                      | GO:0051252 | P | 1248 | 1.11E-16 | 1.64E-14 |
| 11 | 5875 | F3 vs. S3 | - | Regulation | Translation | regulation of RNA splicing                                                               | GO:0043484 | P | 43   | 9.45E-04 | 1.13E-02 |
| 11 | 5876 | F3 vs. S3 | - | Regulation | Translation | ribonucleoprotein complex                                                                | GO:1990904 | C | 469  | 0.00E+00 | 0.00E+00 |
| 11 | 5877 | F3 vs. S3 | - | Regulation | Translation | ribonucleoprotein complex assembly                                                       | GO:0022618 | P | 125  | 0.00E+00 | 0.00E+00 |
| 11 | 5878 | F3 vs. S3 | - | Regulation | Translation | ribonucleoprotein complex biogenesis                                                     | GO:0022613 | P | 315  | 0.00E+00 | 0.00E+00 |
| 11 | 5879 | F3 vs. S3 | - | Regulation | Translation | ribonucleoprotein complex export from nucleus                                            | GO:0071426 | P | 41   | 2.91E-03 | 2.72E-02 |
| 11 | 5880 | F3 vs. S3 | - | Regulation | Translation | ribonucleoprotein complex localization                                                   | GO:0071166 | P | 41   | 2.91E-03 | 2.72E-02 |
| 11 | 5881 | F3 vs. S3 | - | Regulation | Translation | ribonucleoprotein complex subunit organization                                           | GO:0071826 | P | 127  | 0.00E+00 | 0.00E+00 |
| 11 | 5882 | F3 vs. S3 | - | Regulation | Translation | ribosomal large subunit assembly                                                         | GO:0000027 | P | 35   | 9.56E-09 | 4.29E-07 |
| 11 | 5883 | F3 vs. S3 | - | Regulation | Translation | ribosomal large subunit biogenesis                                                       | GO:0042273 | P | 85   | 1.98E-14 | 2.31E-12 |
| 11 | 5884 | F3 vs. S3 | - | Regulation | Translation | ribosomal small subunit assembly                                                         | GO:0000028 | P | 30   | 3.16E-09 | 1.61E-07 |
| 11 | 5885 | F3 vs. S3 | - | Regulation | Translation | ribosomal small subunit biogenesis                                                       | GO:0042274 | P | 69   | 3.33E-16 | 4.56E-14 |
| 11 | 5886 | F3 vs. S3 | - | Regulation | Translation | ribosomal subunit                                                                        | GO:0044391 | C | 239  | 0.00E+00 | 0.00E+00 |
| 11 | 5887 | F3 vs. S3 | - | Regulation | Translation | ribosome                                                                                 | GO:0005840 | C | 300  | 0.00E+00 | 0.00E+00 |
| 11 | 5888 | F3 vs. S3 | - | Regulation | translation | ribosome assembly                                                                        | GO:0042255 | P | 70   | 1.11E-16 | 1.73E-14 |
| 11 | 5889 | F3 vs. S3 | - | Regulation | Translation | ribosome biogenesis                                                                      | GO:0042254 | P | 260  | 0.00E+00 | 0.00E+00 |
| 11 | 5890 | F3 vs. S3 | - | Regulation | Translation | RNA export from nucleus                                                                  | GO:0006405 | P | 45   | 1.04E-03 | 1.22E-02 |
| 11 | 5891 | F3 vs. S3 | - | Regulation | Translation | RNA localization                                                                         | GO:0006403 | P | 53   | 4.60E-05 | 8.22E-04 |
| 11 | 5892 | F3 vs. S3 | - | Regulation | Translation | RNA phosphodiester bond hydrolysis                                                       | GO:0090501 | P | 30   | 3.57E-04 | 4.91E-03 |
| 11 | 5893 | F3 vs. S3 | - | Regulation | Translation | RNA processing                                                                           | GO:0006396 | P | 510  | 2.22E-16 | 3.11E-14 |
| 11 | 5894 | F3 vs. S3 | - | Regulation | Translation | RNA splicing                                                                             | GO:0008380 | P | 179  | 2.96E-06 | 7.90E-05 |
| 11 | 5895 | F3 vs. S3 | - | Regulation | Translation | RNA splicing, via transesterification reactions                                          | GO:0000375 | P | 151  | 1.60E-05 | 3.29E-04 |
|    |      |           |   |            |             |                                                                                          |            |   |      |          |          |
| 11 | 5896 | F3 vs. S3 | - | Regulation | Translation | RNA splicing, via transesterification reactions with bulged adenosine as nucleophile     | GO:0000377 | P | 151  | 1.60E-05 | 3.31E-04 |
| 11 | 5897 | F3 vs. S3 | - | Regulation | Translation | rRNA binding                                                                             | GO:0019843 | F | 51   | 6.31E-07 | 2.95E-05 |
| 11 | 5898 | F3 vs. S3 | - | Regulation | Translation | rRNA metabolic process                                                                   | GO:0016072 | P | 174  | 4.86E-09 | 2.33E-07 |
| 11 | 5899 | F3 vs. S3 | - | Regulation | Translation | rRNA modification                                                                        | GO:0000154 | P | 21   | 4.47E-03 | 3.84E-02 |
| 11 | 5900 | F3 vs. S3 | - | Regulation | Translation | rRNA processing                                                                          | GO:0006364 | P | 168  | 3.22E-09 | 1.63E-07 |
| 11 | 5901 | F3 vs. S3 | - | Regulation | Translation | small nuclear ribonucleoprotein complex                                                  | GO:0030532 | C | 54   | 1.25E-11 | 3.18E-10 |
| 11 | 5902 | F3 vs. S3 | - | Regulation | Translation | small nucleolar ribonucleoprotein complex                                                | GO:0005732 | C | 20   | 1.91E-04 | 1.62E-03 |
| 11 | 5903 | F3 vs. S3 | - | Regulation | Translation | small ribosomal subunit                                                                  | GO:0015935 | C | 102  | 0.00E+00 | 0.00E+00 |
| 11 | 5904 | F3 vs. S3 | - | Regulation | Translation | small-subunit processome                                                                 | GO:0032040 | C | 39   | 1.27E-06 | 1.87E-05 |
| 11 | 5905 | F3 vs. S3 | - | Regulation | Translation | snoRNA binding                                                                           | GO:0030515 | F | 19   | 1.16E-03 | 2.07E-02 |

|    |      |           |   |                        |             |                                                                         |            |   |     |          |          |
|----|------|-----------|---|------------------------|-------------|-------------------------------------------------------------------------|------------|---|-----|----------|----------|
| 11 | 5906 | F3 vs. S3 | - | Regulation             | Translation | spliceosomal complex                                                    | GO:0005681 | C | 106 | 7.64E-08 | 1.28E-06 |
| 11 | 5907 | F3 vs. S3 | - | Regulation             | Translation | spliceosomal snRNP assembly                                             | GO:0000387 | P | 18  | 5.38E-03 | 4.48E-02 |
| 11 | 5908 | F3 vs. S3 | - | Regulation             | Translation | spliceosomal snRNP complex                                              | GO:0097525 | C | 54  | 1.25E-11 | 3.27E-10 |
| 11 | 5909 | F3 vs. S3 | - | Regulation             | Translation | spliceosomal tri-snRNP complex                                          | GO:0097526 | C | 31  | 3.10E-07 | 4.87E-06 |
| 11 | 5910 | F3 vs. S3 | - | Regulation             | Translation | structural constituent of ribosome                                      | GO:0003735 | F | 234 | 0.00E+00 | 0.00E+00 |
| 11 | 5911 | F3 vs. S3 | - | Regulation             | Translation | translation                                                             | GO:0006412 | P | 361 | 0.00E+00 | 0.00E+00 |
| 11 | 5912 | F3 vs. S3 | - | Regulation             | Translation | tRNA metabolic process                                                  | GO:0006399 | P | 104 | 3.36E-03 | 3.04E-02 |
| 11 | 5913 | F3 vs. S3 | - | Regulation             | Translation | tRNA modification                                                       | GO:0006400 | P | 53  | 4.96E-03 | 4.19E-02 |
| 11 | 5914 | F3 vs. S3 | - | Regulation             | Translation | tRNA processing                                                         | GO:0008033 | P | 66  | 1.59E-03 | 1.70E-02 |
| 11 | 5915 | F3 vs. S3 | - | Regulation             | Translation | U1 snRNP                                                                | GO:0005685 | C | 20  | 5.32E-07 | 8.12E-06 |
| 11 | 5916 | F3 vs. S3 | - | Regulation             | Translation | U12-type spliceosomal complex                                           | GO:0005689 | C | 16  | 9.10E-03 | 4.49E-02 |
| 11 | 5917 | F3 vs. S3 | - | Regulation             | Translation | U2 snRNP                                                                | GO:0005686 | C | 25  | 2.66E-07 | 4.26E-06 |
| 11 | 5918 | F3 vs. S3 | - | Regulation             | Translation | U2-type prespliceosome                                                  | GO:0071004 | C | 19  | 1.31E-03 | 8.76E-03 |
| 11 | 5919 | F3 vs. S3 | - | Regulation             | Translation | U2-type spliceosomal complex                                            | GO:0005684 | C | 41  | 7.97E-05 | 7.68E-04 |
| 11 | 5920 | F3 vs. S3 | - | Regulation             | Translation | U4 snRNP                                                                | GO:0005687 | C | 12  | 1.05E-04 | 9.68E-04 |
| 11 | 5921 | F3 vs. S3 | - | Regulation             | Translation | U4/U6 x U5 tri-snRNP complex                                            | GO:0046540 | C | 23  | 2.91E-05 | 3.24E-04 |
| 11 | 5922 | F3 vs. S3 | - | Regulation             | Translation | U5 snRNP                                                                | GO:0005682 | C | 16  | 1.47E-05 | 1.70E-04 |
| 11 | 5923 | F3 vs. S3 | - | Signaling and response | Signaling   | kinase regulator activity                                               | GO:0019207 | F | 58  | 1.09E-08 | 7.93E-07 |
| 11 | 5924 | F3 vs. S3 | - | Signaling and response | Signaling   | protein kinase complex                                                  | GO:1902911 | C | 55  | 4.72E-06 | 6.01E-05 |
| 11 | 5925 | F3 vs. S3 | - | Signaling and response | Signaling   | protein kinase regulator activity                                       | GO:0019887 | F | 55  | 4.04E-08 | 2.55E-06 |
|    |      |           |   |                        |             | regulation of cyclin-dependent protein serine/threonine kinase activity | GO:0000079 | P | 38  | 1.56E-05 | 3.26E-04 |
| 11 | 5926 | F3 vs. S3 | - | Signaling and response | Signaling   | regulation of kinase activity                                           | GO:0043549 | P | 54  | 1.13E-07 | 4.20E-06 |
| 11 | 5927 | F3 vs. S3 | - | Signaling and response | Signaling   | regulation of phosphatase activity                                      | GO:0010921 | P | 18  | 4.03E-03 | 3.55E-02 |
| 11 | 5928 | F3 vs. S3 | - | Signaling and response | Signaling   | regulation of phosphorylation                                           | GO:0042325 | P | 68  | 4.00E-05 | 7.28E-04 |
| 11 | 5929 | F3 vs. S3 | - | Signaling and response | Signaling   | regulation of protein kinase activity                                   | GO:0045859 | P | 52  | 5.62E-07 | 1.83E-05 |
| 11 | 5930 | F3 vs. S3 | - | Signaling and response | Signaling   | regulation of protein phosphorylation                                   | GO:0001932 | P | 61  | 4.51E-05 | 8.09E-04 |
| 11 | 5931 | F3 vs. S3 | - | Signaling and response | Signaling   | regulation of protein serine/threonine kinase activity                  | GO:0071900 | P | 45  | 2.98E-05 | 5.55E-04 |
| 11 | 5932 | F3 vs. S3 | - | Signaling and response | Signaling   | serine/threonine protein kinase complex                                 | GO:1902554 | C | 51  | 4.14E-06 | 5.33E-05 |
| 11 | 5933 | F3 vs. S3 | - | Signaling and response | Stress      | (1->3)-beta-D-glucan binding (NAD+) activity                            | GO:0001872 | F | 4   | 1.48E-03 | 2.52E-02 |
| 11 | 5934 | F3 vs. S3 | - | Signaling and response | Stress      | cellular response to DNA damage stimulus                                | GO:0006974 | P | 211 | 6.03E-13 | 5.64E-11 |
| 11 | 5935 | F3 vs. S3 | - | Signaling and response | Stress      | somatic cell DNA recombination                                          | GO:0016444 | P | 7   | 4.22E-03 | 3.68E-02 |
| 11 | 5936 | F3 vs. S3 | - | Signaling and response | Stress      |                                                                         |            |   |     |          |          |
