# Supplementary material for: Whether Gametophytes Are Reduced or Unreduced in Angiosperms Might Be Determined Metabolically
Source: MDPI journal article supplement (doi:10.3390/genes11121449), 2020-12-02
Supplement: s1 [file s1]

**Table S2.** Gene ontology (GO) groups and subgroups for all GO terms of differentially expressed genes identified by expression profiling and for GO terms identified by overrepresentation (OGO) and enrichment (EGO) analyses (see Table S1 for assignment rules used for partitioning).

| Line no. | GO no.     | GO group    | GO subgroup   | Type | GO description                                                      |
|----------|------------|-------------|---------------|------|---------------------------------------------------------------------|
| 1        | GO:0005658 | Development | Cell division | C    | alpha DNA polymerase:primase complex                                |
| 2        | GO:0005680 | Development | Cell division | C    | anaphase-promoting complex                                          |
| 3        | GO:0010997 | Development | Cell division | F    | anaphase-promoting complex binding                                  |
| 4        | GO:0031145 | Development | Cell division | P    | anaphase-promoting complex-dependent catabolic process              |
| 5        | GO:0009971 | Development | Cell division | P    | anastral spindle assembly involved in male meiosis                  |
| 6        | GO:0008356 | Development | Cell division | P    | asymmetric cell division                                            |
| 7        | GO:1990939 | Development | Cell division | F    | ATP-dependent microtubule motor activity                            |
| 8        | GO:0006284 | Development | Cell division | P    | base-excision repair                                                |
| 9        | GO:0097510 | Development | Cell division | P    | base-excision repair, AP site formation via deaminated base removal |
| 10       | GO:0090661 | Development | Cell division | C    | box H/ACA telomerase RNP complex                                    |
| 11       | GO:0070531 | Development | Cell division | C    | BRCA1-A complex                                                     |
| 12       | GO:0070552 | Development | Cell division | C    | BRISC complex                                                       |
| 13       | GO:1990298 | Development | Cell division | C    | bub1-bub3 complex                                                   |
| 14       | GO:0015030 | Development | Cell division | C    | Cajal body                                                          |
| 15       | GO:0007049 | Development | Cell division | P    | cell cycle                                                          |
| 16       | GO:0007050 | Development | Cell division | P    | cell cycle arrest                                                   |
| 17       | GO:0000075 | Development | Cell division | P    | cell cycle checkpoint                                               |
| 18       | GO:0044786 | Development | Cell division | P    | cell cycle DNA replication                                          |
| 19       | GO:1902292 | Development | Cell division | P    | cell cycle DNA replication initiation                               |
| 20       | GO:0044843 | Development | Cell division | P    | cell cycle G1/S phase transition                                    |
| 21       | GO:0044770 | Development | Cell division | P    | cell cycle phase transition                                         |
| 22       | GO:0022402 | Development | Cell division | P    | cell cycle process                                                  |
| 23       | GO:0051301 | Development | Cell division | P    | cell division                                                       |
| 24       | GO:0008283 | Development | Cell division | P    | cell population proliferation                                       |
| 25       | GO:0030896 | Development | Cell division | C    | checkpoint clamp complex                                            |
| 26       | GO:0051026 | Development | Cell division | P    | chiasma assembly                                                    |
| 27       | GO:0031497 | Development | Cell division | P    | chromatin assembly                                                  |
| 28       | GO:0005694 | Development | Cell division | C    | chromosome                                                          |
| 29       | GO:0030261 | Development | Cell division | P    | chromosome condensation                                             |
| 30       | GO:0070192 | Development | Cell division | P    | chromosome organization involved in meiotic cell cycle              |
| 31       | GO:0032133 | Development | Cell division | C    | chromosome passenger complex                                        |
| 32       | GO:0007059 | Development | Cell division | P    | chromosome segregation                                              |
| 33       | GO:0051304 | Development | Cell division | P    | chromosome separation                                               |
| 34       | GO:0000775 | Development | Cell division | C    | chromosome, centromeric region                                      |
| 35       | GO:0000243 | Development | Cell division | C    | commitment complex                                                  |
| 36       | GO:0000793 | Development | Cell division | C    | condensed chromosome                                                |
| 37       | GO:0000777 | Development | Cell division | C    | condensed chromosome kinetochore                                    |
| 38       | GO:0000779 | Development | Cell division | C    | condensed chromosome, centromeric region                            |
| 39       | GO:0000794 | Development | Cell division | C    | condensed nuclear chromosome                                        |
| 40       | GO:0000778 | Development | Cell division | C    | condensed nuclear chromosome kinetochore                            |
| 41       | GO:0000780 | Development | Cell division | C    | condensed nuclear chromosome, centromeric region                    |
| 42       | GO:0000796 | Development | Cell division | C    | condensin complex                                                   |
| 43       | GO:0030332 | Development | Cell division | F    | cyclin binding                                                      |
| 44       | GO:0000307 | Development | Cell division | C    | cyclin-dependent protein kinase holoenzyme complex                  |
| 45       | GO:0061575 | Development | Cell division | F    | cyclin-dependent protein serine/threonine kinase activator activity |
| 46       | GO:0004693 | Development | Cell division | F    | cyclin-dependent protein serine/threonine kinase activity           |
| 47       | GO:0016538 | Development | Cell division | F    | cyclin-dependent protein serine/threonine kinase regulator activity |
| 48       | GO:0000910 | Development | Cell division | P    | cytokinesis                                                         |
| 49       | GO:0000911 | Development | Cell division | P    | cytokinesis by cell plate formation                                 |
| 50       | GO:0061640 | Development | Cell division | P    | cytoskeleton-dependent cytokinesis                                  |
| 51       | GO:0043625 | Development | Cell division | C    | delta DNA polymerase complex                                        |
| 52       | GO:0071897 | Development | Cell division | P    | DNA biosynthetic process                                            |
| 53       | GO:0003689 | Development | Cell division | F    | DNA clamp loader activity                                           |
| 54       | GO:0000077 | Development | Cell division | P    | DNA damage checkpoint                                               |
| 55       | GO:0080111 | Development | Cell division | P    | DNA demethylation                                                   |
| 56       | GO:0032508 | Development | Cell division | P    | DNA duplex unwinding                                                |
| 57       | GO:0042023 | Development | Cell division | P    | DNA endoreduplication                                               |
| 58       | GO:0003678 | Development | Cell division | F    | DNA helicase activity                                               |
| 59       | GO:0033202 | Development | Cell division | C    | DNA helicase complex                                                |
| 60       | GO:0031570 | Development | Cell division | P    | DNA integrity checkpoint                                            |
| 61       | GO:0003910 | Development | Cell division | F    | DNA ligase (ATP) activity                                           |
| 62       | GO:0006266 | Development | Cell division | P    | DNA ligation                                                        |
| 63       | GO:0051103 | Development | Cell division | P    | DNA ligation involved in DNA repair                                 |
| 64       | GO:0009294 | Development | Cell division | P    | DNA mediated transformation                                         |
| 65       | GO:0006323 | Development | Cell division | P    | DNA packaging                                                       |
| 66       | GO:0044815 | Development | Cell division | C    | DNA packaging complex                                               |
| 67       | GO:0070182 | Development | Cell division | F    | DNA polymerase binding                                              |
| 68       | GO:0042575 | Development | Cell division | C    | DNA polymerase complex                                              |
| 69       | GO:0030337 | Development | Cell division | F    | DNA polymerase processivity factor activity                         |
| 70       | GO:0006310 | Development | Cell division | P    | DNA recombination                                                   |
| 71       | GO:0006281 | Development | Cell division | P    | DNA repair                                                          |
| 72       | GO:1990391 | Development | Cell division | C    | DNA repair complex                                                  |
| 73       | GO:0006260 | Development | Cell division | P    | DNA replication                                                     |

|     |            |             |               |   |                                                                         |
|-----|------------|-------------|---------------|---|-------------------------------------------------------------------------|
| 74  | GO:0000076 | Development | Cell division | P | DNA replication checkpoint                                              |
| 75  | GO:0005662 | Development | Cell division | C | DNA replication factor A complex                                        |
| 76  | GO:0005663 | Development | Cell division | C | DNA replication factor C complex                                        |
| 77  | GO:0006270 | Development | Cell division | P | DNA replication initiation                                              |
| 78  | GO:0003688 | Development | Cell division | F | DNA replication origin binding                                          |
| 79  | GO:0031261 | Development | Cell division | C | DNA replication preinitiation complex                                   |
| 80  | GO:0071163 | Development | Cell division | P | DNA replication preinitiation complex assembly                          |
| 81  | GO:0006336 | Development | Cell division | P | DNA replication-independent nucleosome assembly                         |
| 82  | GO:0022616 | Development | Cell division | P | DNA strand elongation                                                   |
| 83  | GO:0006271 | Development | Cell division | P | DNA strand elongation involved in DNA replication                       |
| 84  | GO:0003916 | Development | Cell division | F | DNA topoisomerase activity                                              |
| 85  | GO:0003918 | Development | Cell division | F | DNA topoisomerase type II (double strand cut, ATP-hydrolyzing) activity |
| 86  | GO:0009330 | Development | Cell division | C | DNA topoisomerase type II (double strand cut, ATP-hydrolyzing) complex  |
| 87  | GO:0006265 | Development | Cell division | P | DNA topological change                                                  |
| 88  | GO:0006268 | Development | Cell division | P | DNA unwinding involved in DNA replication                               |
| 89  | GO:0003906 | Development | Cell division | F | DNA-(apurinic or apyrimidinic site) endonuclease activity               |
| 90  | GO:0006261 | Development | Cell division | P | DNA-dependent DNA replication                                           |
| 91  | GO:0003887 | Development | Cell division | F | DNA-directed DNA polymerase activity                                    |
| 92  | GO:0006302 | Development | Cell division | P | double-strand break repair                                              |
| 93  | GO:0000727 | Development | Cell division | P | double-strand break repair via break-induced replication                |
| 94  | GO:0000724 | Development | Cell division | P | double-strand break repair via homologous recombination                 |
| 95  | GO:0006303 | Development | Cell division | P | double-strand break repair via nonhomologous end joining                |
| 96  | GO:0008309 | Development | Cell division | F | double-stranded DNA exodeoxyribonuclease activity                       |
| 97  | GO:0010385 | Development | Cell division | F | double-stranded methylated DNA binding                                  |
| 98  | GO:0004519 | Development | Cell division | F | endonuclease activity                                                   |
| 99  | GO:0001935 | Development | Cell division | P | endothelial cell proliferation                                          |
| 100 | GO:0010481 | Development | Cell division | P | epidermal cell division                                                 |
| 101 | GO:0070522 | Development | Cell division | C | ERCC4-ERCC1 complex                                                     |
| 102 | GO:0000132 | Development | Cell division | P | establishment of mitotic spindle orientation                            |
| 103 | GO:0007292 | Development | Cell division | P | female gamete generation                                                |
| 104 | GO:0007143 | Development | Cell division | P | female meiotic nuclear division                                         |
| 105 | GO:0000400 | Development | Cell division | F | four-way junction DNA binding                                           |
| 106 | GO:0000082 | Development | Cell division | P | G1/S transition of mitotic cell cycle                                   |
| 107 | GO:0000086 | Development | Cell division | P | G2/M transition of mitotic cell cycle                                   |
| 108 | GO:0007276 | Development | Cell division | P | gamete generation                                                       |
| 109 | GO:0048229 | Development | Cell division | P | gametophyte development                                                 |
| 110 | GO:0000811 | Development | Cell division | C | GIN5 complex                                                            |
| 111 | GO:0051880 | Development | Cell division | F | G-quadruplex DNA binding                                                |
| 112 | GO:0070652 | Development | Cell division | C | HAUS complex                                                            |
| 113 | GO:0000417 | Development | Cell division | C | HIR complex                                                             |
| 114 | GO:0045143 | Development | Cell division | P | homologous chromosome segregation                                       |
| 115 | GO:0035825 | Development | Cell division | P | homologous recombination                                                |
| 116 | GO:0036297 | Development | Cell division | P | interstrand cross-link repair                                           |
| 117 | GO:0000741 | Development | Cell division | P | karyogamy                                                               |
| 118 | GO:0000776 | Development | Cell division | C | kinetochore                                                             |
| 119 | GO:0006273 | Development | Cell division | P | lagging strand elongation                                               |
| 120 | GO:0006272 | Development | Cell division | P | leading strand elongation                                               |
| 121 | GO:0034090 | Development | Cell division | P | maintenance of meiotic sister chromatid cohesion                        |
| 122 | GO:0034088 | Development | Cell division | P | maintenance of mitotic sister chromatid cohesion                        |
| 123 | GO:0048232 | Development | Cell division | P | male gamete generation                                                  |
| 124 | GO:0007112 | Development | Cell division | P | male meiosis cytokinesis                                                |
| 125 | GO:0007140 | Development | Cell division | P | male meiotic nuclear division                                           |
| 126 | GO:0042555 | Development | Cell division | C | MCM complex                                                             |
| 127 | GO:0009561 | Development | Cell division | P | megagametogenesis                                                       |
| 128 | GO:0009554 | Development | Cell division | P | meGasporogenesis                                                        |
| 129 | GO:0007127 | Development | Cell division | P | meiosis I                                                               |
| 130 | GO:0061982 | Development | Cell division | P | meiosis I cell cycle process                                            |
| 131 | GO:0051321 | Development | Cell division | P | meiotic cell cycle                                                      |
| 132 | GO:1903046 | Development | Cell division | P | meiotic cell cycle process                                              |
| 133 | GO:0010032 | Development | Cell division | P | meiotic chromosome condensation                                         |
| 134 | GO:0045132 | Development | Cell division | P | meiotic chromosome segregation                                          |
| 135 | GO:0051307 | Development | Cell division | P | meiotic chromosome separation                                           |
| 136 | GO:0033206 | Development | Cell division | P | meiotic cytokinesis                                                     |
| 137 | GO:0042138 | Development | Cell division | P | meiotic DNA double-strand break formation                               |
| 138 | GO:0000706 | Development | Cell division | P | meiotic DNA double-strand break processing                              |
| 139 | GO:0000710 | Development | Cell division | P | meiotic mismatch repair                                                 |
| 140 | GO:0140013 | Development | Cell division | P | meiotic nuclear division                                                |
| 141 | GO:0051754 | Development | Cell division | P | meiotic sister chromatid cohesion, centromeric                          |
| 142 | GO:0055046 | Development | Cell division | P | microgametogenesis                                                      |
| 143 | GO:0010480 | Development | Cell division | P | microsporocyte differentiation                                          |
| 144 | GO:0009556 | Development | Cell division | P | microsporogenesis                                                       |
| 145 | GO:1902850 | Development | Cell division | P | microtubule cytoskeleton organization involved in mitosis               |
| 146 | GO:0003777 | Development | Cell division | F | microtubule motor activity                                              |
| 147 | GO:0008568 | Development | Cell division | F | microtubule-severing ATPase activity                                    |
| 148 | GO:0005872 | Development | Cell division | C | minus-end kinesin complex                                               |
| 149 | GO:0006298 | Development | Cell division | P | mismatch repair                                                         |
| 150 | GO:0032300 | Development | Cell division | C | mismatch repair complex                                                 |
| 151 | GO:0030983 | Development | Cell division | F | mismatched DNA binding                                                  |

|     |            |             |               |   |                                                                    |
|-----|------------|-------------|---------------|---|--------------------------------------------------------------------|
| 152 | GO:0000278 | Development | Cell division | P | mitotic cell cycle                                                 |
| 153 | GO:0007093 | Development | Cell division | P | mitotic cell cycle checkpoint                                      |
| 154 | GO:0044772 | Development | Cell division | P | mitotic cell cycle phase transition                                |
| 155 | GO:1903047 | Development | Cell division | P | mitotic cell cycle process                                         |
| 156 | GO:0033597 | Development | Cell division | C | mitotic checkpoint complex                                         |
| 157 | GO:0007076 | Development | Cell division | P | mitotic chromosome condensation                                    |
| 158 | GO:0000281 | Development | Cell division | P | mitotic cytokinesis                                                |
| 159 | GO:0044774 | Development | Cell division | P | mitotic DNA integrity checkpoint                                   |
| 160 | GO:1902969 | Development | Cell division | P | mitotic DNA replication                                            |
| 161 | GO:0033314 | Development | Cell division | P | mitotic DNA replication checkpoint                                 |
| 162 | GO:1902975 | Development | Cell division | P | mitotic DNA replication initiation                                 |
| 163 | GO:1902977 | Development | Cell division | P | mitotic DNA replication preinitiation complex assembly             |
| 164 | GO:0000080 | Development | Cell division | P | mitotic G1 phase                                                   |
| 165 | GO:0000085 | Development | Cell division | P | mitotic G2 phase                                                   |
| 166 | GO:0044818 | Development | Cell division | P | mitotic G2/M transition checkpoint                                 |
| 167 | GO:0140014 | Development | Cell division | P | mitotic nuclear division                                           |
| 168 | GO:0006312 | Development | Cell division | P | mitotic recombination                                              |
| 169 | GO:0000084 | Development | Cell division | P | mitotic S phase                                                    |
| 170 | GO:0000070 | Development | Cell division | P | mitotic sister chromatid segregation                               |
| 171 | GO:0072686 | Development | Cell division | C | mitotic spindle                                                    |
| 172 | GO:0090307 | Development | Cell division | P | mitotic spindle assembly                                           |
| 173 | GO:0007094 | Development | Cell division | P | mitotic spindle assembly checkpoint                                |
| 174 | GO:0071174 | Development | Cell division | P | mitotic spindle checkpoint                                         |
| 175 | GO:0007052 | Development | Cell division | P | mitotic spindle organization                                       |
| 176 | GO:0030870 | Development | Cell division | C | Mre11 complex                                                      |
| 177 | GO:0032504 | Development | Cell division | P | multicellular organism reproduction                                |
| 178 | GO:0032301 | Development | Cell division | C | MutSalpA complex                                                   |
| 179 | GO:0045786 | Development | Cell division | P | negative regulation of cell cycle                                  |
| 180 | GO:1902750 | Development | Cell division | P | negative regulation of cell cycle G2/M phase transition            |
| 181 | GO:1901988 | Development | Cell division | P | negative regulation of cell cycle phase transition                 |
| 182 | GO:0010948 | Development | Cell division | P | negative regulation of cell cycle process                          |
| 183 | GO:0051782 | Development | Cell division | P | negative regulation of cell division                               |
| 184 | GO:0008285 | Development | Cell division | P | negative regulation of cell population proliferation               |
| 185 | GO:2001251 | Development | Cell division | P | negative regulation of chromosome organization                     |
| 186 | GO:0051985 | Development | Cell division | P | negative regulation of chromosome segregation                      |
| 187 | GO:1905819 | Development | Cell division | P | negative regulation of chromosome separation                       |
| 188 | GO:0045910 | Development | Cell division | P | negative regulation of DNA recombination                           |
| 189 | GO:0010972 | Development | Cell division | P | negative regulation of G2/M transition of mitotic cell cycle       |
| 190 | GO:1902100 | Development | Cell division | P | negative regulation of metaphase/anaphase transition of cell cycle |
| 191 | GO:0045930 | Development | Cell division | P | negative regulation of mitotic cell cycle                          |
| 192 | GO:1901991 | Development | Cell division | P | negative regulation of mitotic cell cycle phase transition         |
| 193 | GO:0045841 | Development | Cell division | P | negative regulation of mitotic metaphase/anaphase transition       |
| 194 | GO:0045839 | Development | Cell division | P | negative regulation of mitotic nuclear division                    |
| 195 | GO:0033048 | Development | Cell division | P | negative regulation of mitotic sister chromatid segregation        |
| 196 | GO:2000816 | Development | Cell division | P | negative regulation of mitotic sister chromatid separation         |
| 197 | GO:0051784 | Development | Cell division | P | negative regulation of nuclear division                            |
| 198 | GO:0045128 | Development | Cell division | P | negative regulation of reciprocal meiotic recombination            |
| 199 | GO:2000242 | Development | Cell division | P | negative regulation of reproductive process                        |
| 200 | GO:0033046 | Development | Cell division | P | negative regulation of sister chromatid segregation                |
| 201 | GO:0010213 | Development | Cell division | P | non-photoreactive DNA repair                                       |
| 202 | GO:1902315 | Development | Cell division | P | nuclear cell cycle DNA replication initiation                      |
| 203 | GO:0098813 | Development | Cell division | P | nuclear chromosome segregation                                     |
| 204 | GO:0000280 | Development | Cell division | P | nuclear division                                                   |
| 205 | GO:0033260 | Development | Cell division | P | nuclear DNA replication                                            |
| 206 | GO:0031468 | Development | Cell division | P | nuclear envelope reassembly                                        |
| 207 | GO:0007097 | Development | Cell division | P | nuclear migration                                                  |
| 208 | GO:0031022 | Development | Cell division | P | nuclear migration along microfilament                              |
| 209 | GO:0005664 | Development | Cell division | C | nuclear origin of replication recognition complex                  |
| 210 | GO:0043596 | Development | Cell division | C | nuclear replication fork                                           |
| 211 | GO:0043224 | Development | Cell division | C | nuclear SCF ubiquitin ligase complex                               |
| 212 | GO:0004518 | Development | Cell division | F | nuclease activity                                                  |
| 213 | GO:0090304 | Development | Cell division | P | nucleic acid metabolic process                                     |
| 214 | GO:0009112 | Development | Cell division | P | nucleobase metabolic process                                       |
| 215 | GO:0006139 | Development | Cell division | P | nucleobase-containing compound metabolic process                   |
| 216 | GO:0055086 | Development | Cell division | P | nucleobase-containing small molecule metabolic process             |
| 217 | GO:0033865 | Development | Cell division | P | nucleoside bisphosphate metabolic process                          |
| 218 | GO:0009132 | Development | Cell division | P | nucleoside diphosphate metabolic process                           |
| 219 | GO:0006165 | Development | Cell division | P | nucleoside diphosphate phosphorylation                             |
| 220 | GO:0009116 | Development | Cell division | P | nucleoside metabolic process                                       |
| 221 | GO:1901265 | Development | Cell division | F | nucleoside phosphate binding                                       |
| 222 | GO:0006753 | Development | Cell division | P | nucleoside phosphate metabolic process                             |
| 223 | GO:0009142 | Development | Cell division | P | nucleoside triphosphate biosynthetic process                       |
| 224 | GO:0017110 | Development | Cell division | F | nucleoside-diphosphatase activity                                  |
| 225 | GO:0017111 | Development | Cell division | F | nucleoside-triphosphatase activity                                 |
| 226 | GO:0031492 | Development | Cell division | F | nucleosomal DNA binding                                            |
| 227 | GO:0000786 | Development | Cell division | C | nucleosome                                                         |
| 228 | GO:0006334 | Development | Cell division | P | nucleosome assembly                                                |
| 229 | GO:0031491 | Development | Cell division | F | nucleosome binding                                                 |

|     |            |             |               |   |                                                                                 |
|-----|------------|-------------|---------------|---|---------------------------------------------------------------------------------|
| 230 | GO:0016584 | Development | Cell division | P | nucleosome positioning                                                          |
| 231 | GO:0008252 | Development | Cell division | F | nucleotidase activity                                                           |
| 232 | GO:0000166 | Development | Cell division | F | nucleotide binding                                                              |
| 233 | GO:0009165 | Development | Cell division | P | nucleotide biosynthetic process                                                 |
| 234 | GO:0009117 | Development | Cell division | P | nucleotide metabolic process                                                    |
| 235 | GO:0006289 | Development | Cell division | P | nucleotide-excision repair                                                      |
| 236 | GO:0000110 | Development | Cell division | C | nucleotide-excision repair factor 1 complex                                     |
| 237 | GO:0000111 | Development | Cell division | C | nucleotide-excision repair factor 2 complex                                     |
| 238 | GO:0000717 | Development | Cell division | P | nucleotide-excision repair, DNA duplex unwinding                                |
| 239 | GO:0033683 | Development | Cell division | P | nucleotide-excision repair, DNA incision                                        |
| 240 | GO:0006296 | Development | Cell division | P | nucleotide-excision repair, DNA incision, 5'-to lesion                          |
| 241 | GO:0006294 | Development | Cell division | P | nucleotide-excision repair, preincision complex assembly                        |
| 242 | GO:0009226 | Development | Cell division | P | nucleotide-sugar biosynthetic process                                           |
| 243 | GO:0009225 | Development | Cell division | P | nucleotide-sugar metabolic process                                              |
| 244 | GO:0016779 | Development | Cell division | F | nucleotidyltransferase activity                                                 |
| 245 | GO:0000808 | Development | Cell division | C | origin recognition complex                                                      |
| 246 | GO:0032357 | Development | Cell division | F | oxidized purine DNA binding                                                     |
| 247 | GO:0043186 | Development | Cell division | C | P granule                                                                       |
| 248 | GO:0043626 | Development | Cell division | C | PCNA complex                                                                    |
| 249 | GO:0000914 | Development | Cell division | P | phragmoplast assembly                                                           |
| 250 | GO:0080175 | Development | Cell division | P | phragmoplast microtubule organization                                           |
| 251 | GO:0010197 | Development | Cell division | P | polar nucleus fusion                                                            |
| 252 | GO:0009846 | Development | Cell division | P | pollen germination                                                              |
| 253 | GO:0048235 | Development | Cell division | P | pollen sperm cell differentiation                                               |
| 254 | GO:0048868 | Development | Cell division | P | pollen tube development                                                         |
| 255 | GO:0009860 | Development | Cell division | P | pollen tube growth                                                              |
| 256 | GO:0010183 | Development | Cell division | P | pollen tube guidance                                                            |
| 257 | GO:0009856 | Development | Cell division | P | pollination                                                                     |
| 258 | GO:0045787 | Development | Cell division | P | positive regulation of cell cycle                                               |
| 259 | GO:0051781 | Development | Cell division | P | positive regulation of cell division                                            |
| 260 | GO:0008284 | Development | Cell division | P | positive regulation of cell population proliferation                            |
| 261 | GO:1901972 | Development | Cell division | P | positive regulation of DNA-5-methylcytosine glycosylase activity                |
| 262 | GO:1900087 | Development | Cell division | P | positive regulation of G1/S transition of mitotic cell cycle                    |
| 263 | GO:0045836 | Development | Cell division | P | positive regulation of meiotic nuclear division                                 |
| 264 | GO:0045931 | Development | Cell division | P | positive regulation of mitotic cell cycle                                       |
| 265 | GO:0045951 | Development | Cell division | P | positive regulation of mitotic recombination                                    |
| 266 | GO:1901969 | Development | Cell division | P | positive regulation of polynucleotide 3'-phosphatase activity                   |
| 267 | GO:0006301 | Development | Cell division | P | postreplication repair                                                          |
| 268 | GO:0006279 | Development | Cell division | P | premeiotic DNA replication                                                      |
| 269 | GO:0009574 | Development | Cell division | C | preprophase band                                                                |
| 270 | GO:0000913 | Development | Cell division | P | preprophase band assembly                                                       |
| 271 | GO:0036388 | Development | Cell division | P | pre-replicative complex assembly                                                |
| 272 | GO:1902299 | Development | Cell division | P | pre-replicative complex assembly involved in cell cycle DNA replication         |
| 273 | GO:0006267 | Development | Cell division | P | pre-replicative complex assembly involved in nuclear cell cycle DNA replication |
| 274 | GO:0006290 | Development | Cell division | P | pyrimidine dimer repair                                                         |
| 275 | GO:0140527 | Development | Cell division | F | reciprocal homologous recombination                                             |
| 276 | GO:0007131 | Development | Cell division | P | reciprocal meiotic recombination                                                |
| 277 | GO:0048544 | Development | Cell division | P | recognition of pollen                                                           |
| 278 | GO:0000725 | Development | Cell division | P | recombinational repair                                                          |
| 279 | GO:0051726 | Development | Cell division | P | regulation of cell cycle                                                        |
| 280 | GO:1902806 | Development | Cell division | P | regulation of cell cycle G1/S phase transition                                  |
| 281 | GO:1902749 | Development | Cell division | P | regulation of cell cycle G2/M phase transition                                  |
| 282 | GO:1901987 | Development | Cell division | P | regulation of cell cycle phase transition                                       |
| 283 | GO:0010564 | Development | Cell division | P | regulation of cell cycle process                                                |
| 284 | GO:0051302 | Development | Cell division | P | regulation of cell division                                                     |
| 285 | GO:0042127 | Development | Cell division | P | regulation of cell population proliferation                                     |
| 286 | GO:1902275 | Development | Cell division | P | regulation of chromatin organization                                            |
| 287 | GO:0033044 | Development | Cell division | P | regulation of chromosome organization                                           |
| 288 | GO:0051983 | Development | Cell division | P | regulation of chromosome segregation                                            |
| 289 | GO:1905818 | Development | Cell division | P | regulation of chromosome separation                                             |
| 290 | GO:1904029 | Development | Cell division | P | regulation of cyclin-dependent protein kinase activity                          |
| 291 | GO:0032465 | Development | Cell division | P | regulation of cytokinesis                                                       |
| 292 | GO:0032875 | Development | Cell division | P | regulation of DNA endoreduplication                                             |
| 293 | GO:0051052 | Development | Cell division | P | regulation of DNA metabolic process                                             |
| 294 | GO:0000018 | Development | Cell division | P | regulation of DNA recombination                                                 |
| 295 | GO:0006282 | Development | Cell division | P | regulation of DNA repair                                                        |
| 296 | GO:0006275 | Development | Cell division | P | regulation of DNA replication                                                   |
| 297 | GO:0090329 | Development | Cell division | P | regulation of DNA-dependent DNA replication                                     |
| 298 | GO:0030174 | Development | Cell division | P | regulation of DNA-dependent DNA replication initiation                          |
| 299 | GO:0080155 | Development | Cell division | P | regulation of double fertilization forming a zygote and endosperm               |
| 300 | GO:2000779 | Development | Cell division | P | regulation of double-strand break repair                                        |
| 301 | GO:0010569 | Development | Cell division | P | regulation of double-strand break repair via homologous recombination           |
| 302 | GO:0010389 | Development | Cell division | P | regulation of G2/M transition of mitotic cell cycle                             |
| 303 | GO:0051095 | Development | Cell division | P | regulation of helicase activity                                                 |
| 304 | GO:0051445 | Development | Cell division | P | regulation of meiotic cell cycle                                                |
| 305 | GO:0040020 | Development | Cell division | P | regulation of meiotic nuclear division                                          |
| 306 | GO:1902099 | Development | Cell division | P | regulation of metaphase/anaphase transition of cell cycle                       |
| 307 | GO:0007346 | Development | Cell division | P | regulation of mitotic cell cycle                                                |

|     |            |             |               |   |                                                              |
|-----|------------|-------------|---------------|---|--------------------------------------------------------------|
| 308 | GO:1901990 | Development | Cell division | P | regulation of mitotic cell cycle phase transition            |
| 309 | GO:0090266 | Development | Cell division | P | regulation of mitotic cell cycle spindle assembly checkpoint |
| 310 | GO:0030071 | Development | Cell division | P | regulation of mitotic metaphase/anaphase transition          |
| 311 | GO:0007088 | Development | Cell division | P | regulation of mitotic nuclear division                       |
| 312 | GO:0000019 | Development | Cell division | P | regulation of mitotic recombination                          |
| 313 | GO:0033047 | Development | Cell division | P | regulation of mitotic sister chromatid segregation           |
| 314 | GO:0010965 | Development | Cell division | P | regulation of mitotic sister chromatid separation            |
| 315 | GO:0060236 | Development | Cell division | P | regulation of mitotic spindle organization                   |
| 316 | GO:0051783 | Development | Cell division | P | regulation of nuclear division                               |
| 317 | GO:0033045 | Development | Cell division | P | regulation of sister chromatid segregation                   |
| 318 | GO:0090224 | Development | Cell division | P | regulation of spindle organization                           |
| 319 | GO:2000035 | Development | Cell division | P | regulation of stem cell division                             |
| 320 | GO:0032204 | Development | Cell division | P | regulation of telomere maintenance                           |
| 321 | GO:0005657 | Development | Cell division | C | replication fork                                             |
| 322 | GO:0048478 | Development | Cell division | P | replication fork protection                                  |
| 323 | GO:0031298 | Development | Cell division | C | replication fork protection complex                          |
| 324 | GO:0030894 | Development | Cell division | C | replisome                                                    |
| 325 | GO:0000003 | Development | Cell division | P | reproduction                                                 |
| 326 | GO:0022414 | Development | Cell division | P | reproductive process                                         |
| 327 | GO:0000712 | Development | Cell division | P | resolution of meiotic recombination intermediates            |
| 328 | GO:0043021 | Development | Cell division | F | ribonucleoprotein complex binding                            |
| 329 | GO:0032549 | Development | Cell division | F | ribonucleoside binding                                       |
| 330 | GO:0033875 | Development | Cell division | P | ribonucleoside bisphosphate metabolic process                |
| 331 | GO:0005971 | Development | Cell division | C | ribonucleoside-diphosphate reductase complex                 |
| 332 | GO:0009259 | Development | Cell division | P | ribonucleotide metabolic process                             |
| 333 | GO:0004749 | Development | Cell division | F | ribose phosphate diphosphokinase activity                    |
| 334 | GO:0002189 | Development | Cell division | C | ribose phosphate diphosphokinase complex                     |
| 335 | GO:0019693 | Development | Cell division | P | ribose phosphate metabolic process                           |
| 336 | GO:0004751 | Development | Cell division | F | ribose-5-phosphate isomerase activity                        |
| 337 | GO:0004750 | Development | Cell division | F | ribulose-phosphate 3-epimerase activity                      |
| 338 | GO:0016070 | Development | Cell division | P | RNA metabolic process                                        |
| 339 | GO:0019005 | Development | Cell division | C | SCF ubiquitin ligase complex                                 |
| 340 | GO:0019953 | Development | Cell division | P | sexual reproduction                                          |
| 341 | GO:0007338 | Development | Cell division | P | single fertilization                                         |
| 342 | GO:0000012 | Development | Cell division | P | single strand break repair                                   |
| 343 | GO:1990518 | Development | Cell division | F | single-stranded 3'-5' DNA helicase activity                  |
| 344 | GO:0003697 | Development | Cell division | F | single-stranded DNA binding                                  |
| 345 | GO:0000014 | Development | Cell division | F | single-stranded DNA endodeoxyribonuclease activity           |
| 346 | GO:0043047 | Development | Cell division | F | single-stranded telomeric DNA binding                        |
| 347 | GO:0007062 | Development | Cell division | P | sister chromatid cohesion                                    |
| 348 | GO:0000819 | Development | Cell division | P | sister chromatid segregation                                 |
| 349 | GO:0035861 | Development | Cell division | C | site of double-strand break                                  |
| 350 | GO:0032116 | Development | Cell division | C | SMC loading complex                                          |
| 351 | GO:0005819 | Development | Cell division | C | spindle                                                      |
| 352 | GO:0051225 | Development | Cell division | P | spindle assembly                                             |
| 353 | GO:0071173 | Development | Cell division | P | spindle assembly checkpoint                                  |
| 354 | GO:0031577 | Development | Cell division | P | spindle checkpoint                                           |
| 355 | GO:0005876 | Development | Cell division | C | spindle microtubule                                          |
| 356 | GO:0051233 | Development | Cell division | C | spindle midzone                                              |
| 357 | GO:0007051 | Development | Cell division | P | spindle organization                                         |
| 358 | GO:0000922 | Development | Cell division | C | spindle pole                                                 |
| 359 | GO:0031616 | Development | Cell division | C | spindle pole centrosome                                      |
| 360 | GO:0098973 | Development | Cell division | F | structural constituent of postsynaptic actin cytoskeleton    |
| 361 | GO:0098725 | Development | Cell division | P | symmetric cell division                                      |
| 362 | GO:0007129 | Development | Cell division | P | synapsis                                                     |
| 363 | GO:0007130 | Development | Cell division | P | synaptonemal complex assembly                                |
| 364 | GO:0006949 | Development | Cell division | P | syncytium formation                                          |
| 365 | GO:0010198 | Development | Cell division | P | synergid death                                               |
| 366 | GO:0043765 | Development | Cell division | F | T/G mismatch-specific endonuclease activity                  |
| 367 | GO:0005697 | Development | Cell division | C | telomerase holoenzyme complex                                |
| 368 | GO:0016233 | Development | Cell division | P | telomere capping                                             |
| 369 | GO:0000723 | Development | Cell division | P | telomere maintenance                                         |
| 370 | GO:0000722 | Development | Cell division | P | telomere maintenance via recombination                       |
| 371 | GO:0007004 | Development | Cell division | P | telomere maintenance via telomerase                          |
| 372 | GO:0010833 | Development | Cell division | P | telomere maintenance via telomere lengthening                |
| 373 | GO:0032200 | Development | Cell division | P | telomere organization                                        |
| 374 | GO:0042162 | Development | Cell division | F | telomeric DNA binding                                        |
| 375 | GO:0019079 | Development | Cell division | P | viral genome replication                                     |
| 376 | GO:0071942 | Development | Cell division | C | XPC complex                                                  |
| 377 | GO:0010158 | Development | Development   | P | abaxial cell fate specification                              |
| 378 | GO:0030479 | Development | Development   | C | actin cortical patch                                         |
| 379 | GO:0015629 | Development | Development   | C | actin cytoskeleton                                           |
| 380 | GO:0030036 | Development | Development   | P | actin cytoskeleton organization                              |
| 381 | GO:0005884 | Development | Development   | C | actin filament                                               |
| 382 | GO:0032432 | Development | Development   | C | actin filament bundle                                        |
| 383 | GO:0042643 | Development | Development   | C | actomyosin, actin portion                                    |
| 384 | GO:0009943 | Development | Development   | P | adaxial/abaxial axis specification                           |
| 385 | GO:0009955 | Development | Development   | P | adaxial/abaxial pattern specification                        |

|     |            |             |             |   |                                                                  |
|-----|------------|-------------|-------------|---|------------------------------------------------------------------|
| 386 | GO:0048830 | Development | Development | P | adventitious root development                                    |
| 387 | GO:0009501 | Development | Development | C | amyloplast                                                       |
| 388 | GO:0048856 | Development | Development | P | anatomical structure development                                 |
| 389 | GO:0048646 | Development | Development | P | anatomical structure formation involved in morphogenesis         |
| 390 | GO:0060249 | Development | Development | P | anatomical structure homeostasis                                 |
| 391 | GO:0009653 | Development | Development | P | anatomical structure morphogenesis                               |
| 392 | GO:0031225 | Development | Development | C | anchored component of membrane                                   |
| 393 | GO:0046658 | Development | Development | C | anchored component of plasma membrane                            |
| 394 | GO:0009887 | Development | Development | P | animal organ morphogenesis                                       |
| 395 | GO:0051211 | Development | Development | P | anisotropic cell growth                                          |
| 396 | GO:0009901 | Development | Development | P | anther dehiscence                                                |
| 397 | GO:0048653 | Development | Development | P | anther development                                               |
| 398 | GO:0048657 | Development | Development | P | anther wall tapetum cell differentiation                         |
| 399 | GO:0048658 | Development | Development | P | anther wall tapetum development                                  |
| 400 | GO:0045177 | Development | Development | C | apical part of cell                                              |
| 401 | GO:0016324 | Development | Development | C | apical plasma membrane                                           |
| 402 | GO:0048046 | Development | Development | C | apoplast                                                         |
| 403 | GO:0090506 | Development | Development | P | axillary shoot meristem initiation                               |
| 404 | GO:0009925 | Development | Development | C | basal plasma membrane                                            |
| 405 | GO:0098588 | Development | Development | C | bounding membrane of organelle                                   |
| 406 | GO:0090610 | Development | Development | P | bundle sheath cell fate specification                            |
| 407 | GO:0048440 | Development | Development | P | carpel development                                               |
| 408 | GO:0048226 | Development | Development | C | Casparian strip                                                  |
| 409 | GO:0005901 | Development | Development | C | caveola                                                          |
| 410 | GO:0005623 | Development | Development | C | cell                                                             |
| 411 | GO:0007155 | Development | Development | P | cell adhesion                                                    |
| 412 | GO:0005938 | Development | Development | C | cell cortex                                                      |
| 413 | GO:0048468 | Development | Development | P | cell development                                                 |
| 414 | GO:0030154 | Development | Development | P | cell differentiation                                             |
| 415 | GO:0045165 | Development | Development | P | cell fate commitment                                             |
| 416 | GO:0001709 | Development | Development | P | cell fate determination                                          |
| 417 | GO:0001708 | Development | Development | P | cell fate specification                                          |
| 418 | GO:0016049 | Development | Development | P | cell growth                                                      |
| 419 | GO:0030054 | Development | Development | C | cell junction                                                    |
| 420 | GO:0000902 | Development | Development | P | cell morphogenesis                                               |
| 421 | GO:0000904 | Development | Development | P | cell morphogenesis involved in differentiation                   |
| 422 | GO:0071944 | Development | Development | C | cell periphery                                                   |
| 423 | GO:0009504 | Development | Development | C | cell plate                                                       |
| 424 | GO:0000919 | Development | Development | P | cell plate assembly                                              |
| 425 | GO:0009920 | Development | Development | P | cell plate formation involved in plant-type cell wall biogenesis |
| 426 | GO:0060187 | Development | Development | C | cell pole                                                        |
| 427 | GO:0042995 | Development | Development | C | cell projection                                                  |
| 428 | GO:0009986 | Development | Development | C | cell surface                                                     |
| 429 | GO:0051286 | Development | Development | C | cell tip                                                         |
| 430 | GO:0009932 | Development | Development | P | cell tip growth                                                  |
| 431 | GO:0005618 | Development | Development | C | cell wall                                                        |
| 432 | GO:0042546 | Development | Development | P | cell wall biogenesis                                             |
| 433 | GO:0042545 | Development | Development | P | cell wall modification                                           |
| 434 | GO:0042547 | Development | Development | P | cell wall modification involved in multidimensional cell growth  |
| 435 | GO:0071555 | Development | Development | P | cell wall organization                                           |
| 436 | GO:0071554 | Development | Development | P | cell wall organization or biogenesis                             |
| 437 | GO:0052546 | Development | Development | P | cell wall pectin metabolic process                               |
| 438 | GO:0005911 | Development | Development | C | cell-cell junction                                               |
| 439 | GO:0007043 | Development | Development | P | cell-cell junction assembly                                      |
| 440 | GO:0110165 | Development | Development | C | cellular anatomical entity                                       |
| 441 | GO:0022607 | Development | Development | P | cellular component assembly                                      |
| 442 | GO:0010927 | Development | Development | P | cellular component assembly involved in morphogenesis            |
| 443 | GO:0044085 | Development | Development | P | cellular component biogenesis                                    |
| 444 | GO:0032989 | Development | Development | P | cellular component morphogenesis                                 |
| 445 | GO:0016043 | Development | Development | P | cellular component organization                                  |
| 446 | GO:0071840 | Development | Development | P | cellular component organization or biogenesis                    |
| 447 | GO:0048869 | Development | Development | P | cellular developmental process                                   |
| 448 | GO:0051641 | Development | Development | P | cellular localization                                            |
| 449 | GO:0009987 | Development | Development | P | cellular process                                                 |
| 450 | GO:0005575 | Development | Development | C | cellular_component                                               |
| 451 | GO:0042807 | Development | Development | C | central vacuole                                                  |
| 452 | GO:0098653 | Development | Development | P | centromere clustering                                            |
| 453 | GO:0034508 | Development | Development | P | centromere complex assembly                                      |
| 454 | GO:0005813 | Development | Development | C | centrosome                                                       |
| 455 | GO:0007098 | Development | Development | P | centrosome cycle                                                 |
| 456 | GO:0000785 | Development | Development | C | chromatin                                                        |
| 457 | GO:0006333 | Development | Development | P | chromatin assembly or disassembly                                |
| 458 | GO:0006325 | Development | Development | P | chromatin organization                                           |
| 459 | GO:0010369 | Development | Development | C | chromocenter                                                     |
| 460 | GO:0009661 | Development | Development | P | chromoplast organization                                         |
| 461 | GO:0098687 | Development | Development | C | chromosomal region                                               |
| 462 | GO:0051276 | Development | Development | P | chromosome organization                                          |
| 463 | GO:0000781 | Development | Development | C | chromosome, telomeric region                                     |

|     |            |             |             |   |                                                                   |
|-----|------------|-------------|-------------|---|-------------------------------------------------------------------|
| 464 | GO:0003013 | Development | Development | P | circulatory system process                                        |
| 465 | GO:0005801 | Development | Development | C | cis-Golgi network                                                 |
| 466 | GO:0048268 | Development | Development | P | clathrin coat assembly                                            |
| 467 | GO:0072318 | Development | Development | P | clathrin coat disassembly                                         |
| 468 | GO:0030132 | Development | Development | C | clathrin coat of coated pit                                       |
| 469 | GO:0030130 | Development | Development | C | clathrin coat of trans-Golgi network vesicle                      |
| 470 | GO:0032050 | Development | Development | F | clathrin heavy chain binding                                      |
| 471 | GO:0030125 | Development | Development | C | clathrin vesicle coat                                             |
| 472 | GO:0045334 | Development | Development | C | clathrin-coated endocytic vesicle                                 |
| 473 | GO:0005905 | Development | Development | C | clathrin-coated pit                                               |
| 474 | GO:0030136 | Development | Development | C | clathrin-coated vesicle                                           |
| 475 | GO:0072583 | Development | Development | P | clathrin-dependent endocytosis                                    |
| 476 | GO:0043674 | Development | Development | C | columella                                                         |
| 477 | GO:0030864 | Development | Development | C | cortical actin cytoskeleton                                       |
| 478 | GO:0030863 | Development | Development | C | cortical cytoskeleton                                             |
| 479 | GO:0030865 | Development | Development | P | cortical cytoskeleton organization                                |
| 480 | GO:0055028 | Development | Development | C | cortical microtubule                                              |
| 481 | GO:0030981 | Development | Development | C | cortical microtubule cytoskeleton                                 |
| 482 | GO:0043622 | Development | Development | P | cortical microtubule organization                                 |
| 483 | GO:0010005 | Development | Development | C | cortical microtubule, transverse to long axis                     |
| 484 | GO:0048825 | Development | Development | P | cotyledon development                                             |
| 485 | GO:0048826 | Development | Development | P | cotyledon morphogenesis                                           |
| 486 | GO:0010588 | Development | Development | P | cotyledon vascular tissue pattern formation                       |
| 487 | GO:0042335 | Development | Development | P | cuticle development                                               |
| 488 | GO:0005737 | Development | Development | C | cytoplasm                                                         |
| 489 | GO:0005881 | Development | Development | C | cytoplasmic microtubule                                           |
| 490 | GO:0031122 | Development | Development | P | cytoplasmic microtubule organization                              |
| 491 | GO:0009898 | Development | Development | C | cytoplasmic side of plasma membrane                               |
| 492 | GO:0008092 | Development | Development | F | cytoskeletal protein binding                                      |
| 493 | GO:0005856 | Development | Development | C | cytoskeleton                                                      |
| 494 | GO:0007010 | Development | Development | P | cytoskeleton organization                                         |
| 495 | GO:0005829 | Development | Development | C | cytosol                                                           |
| 496 | GO:0009855 | Development | Development | P | determination of bilateral symmetry                               |
| 497 | GO:0048588 | Development | Development | P | developmental cell growth                                         |
| 498 | GO:0048589 | Development | Development | P | developmental growth                                              |
| 499 | GO:0060560 | Development | Development | P | developmental growth involved in morphogenesis                    |
| 500 | GO:0032502 | Development | Development | P | developmental process                                             |
| 501 | GO:0003006 | Development | Development | P | developmental process involved in reproduction                    |
| 502 | GO:0080186 | Development | Development | P | developmental vegetative growth                                   |
| 503 | GO:0009567 | Development | Development | P | double fertilization forming a zygote and endosperm               |
| 504 | GO:0009790 | Development | Development | P | embryo development                                                |
| 505 | GO:0009793 | Development | Development | P | embryo development ending in seed dormancy                        |
| 506 | GO:0009558 | Development | Development | P | embryo sac cellularization                                        |
| 507 | GO:0009559 | Development | Development | P | embryo sac central cell differentiation                           |
| 508 | GO:0009553 | Development | Development | P | embryo sac development                                            |
| 509 | GO:0000578 | Development | Development | P | embryonic axis specification                                      |
| 510 | GO:0048598 | Development | Development | P | embryonic morphogenesis                                           |
| 511 | GO:0012505 | Development | Development | C | endomembrane system                                               |
| 512 | GO:0010256 | Development | Development | P | endomembrane system organization                                  |
| 513 | GO:0005788 | Development | Development | C | endoplasmic reticulum lumen                                       |
| 514 | GO:0016320 | Development | Development | P | endoplasmic reticulum membrane fusion                             |
| 515 | GO:0090158 | Development | Development | P | endoplasmic reticulum membrane organization                       |
| 516 | GO:0007029 | Development | Development | P | endoplasmic reticulum organization                                |
| 517 | GO:0044432 | Development | Development | C | endoplasmic reticulum part                                        |
| 518 | GO:0098827 | Development | Development | C | endoplasmic reticulum subcompartment                              |
| 519 | GO:0071782 | Development | Development | C | endoplasmic reticulum tubular network                             |
| 520 | GO:0071786 | Development | Development | P | endoplasmic reticulum tubular network organization                |
| 521 | GO:0005793 | Development | Development | C | endoplasmic reticulum-Golgi intermediate compartment              |
| 522 | GO:0061817 | Development | Development | P | endoplasmic reticulum-plasma membrane tethering                   |
| 523 | GO:0009960 | Development | Development | P | endosperm development                                             |
| 524 | GO:0031975 | Development | Development | C | envelope                                                          |
| 525 | GO:0009913 | Development | Development | P | epidermal cell differentiation                                    |
| 526 | GO:0009957 | Development | Development | P | epidermal cell fate specification                                 |
| 527 | GO:0000923 | Development | Development | C | equatorial microtubule organizing center                          |
| 528 | GO:0010168 | Development | Development | C | ER body                                                           |
| 529 | GO:0000815 | Development | Development | C | ESCRT III complex                                                 |
| 530 | GO:0007164 | Development | Development | P | establishment of tissue polarity                                  |
| 531 | GO:0007163 | Development | Development | P | establishment or maintenance of cell polarity                     |
| 532 | GO:0030951 | Development | Development | P | establishment or maintenance of microtubule cytoskeleton polarity |
| 533 | GO:0009513 | Development | Development | C | etioplast                                                         |
| 534 | GO:0034426 | Development | Development | C | etioplast membrane                                                |
| 535 | GO:0000145 | Development | Development | C | exocyst                                                           |
| 536 | GO:0030312 | Development | Development | C | external encapsulating structure                                  |
| 537 | GO:0045229 | Development | Development | P | external encapsulating structure organization                     |
| 538 | GO:0009897 | Development | Development | C | external side of plasma membrane                                  |
| 539 | GO:0070062 | Development | Development | C | extracellular exosome                                             |
| 540 | GO:0031012 | Development | Development | C | extracellular matrix                                              |
| 541 | GO:0030198 | Development | Development | P | extracellular matrix organization                                 |



|     |            |             |             |   |                                                                          |
|-----|------------|-------------|-------------|---|--------------------------------------------------------------------------|
| 542 | GO:0005576 | Development | Development | C | extracellular region                                                     |
| 543 | GO:0005615 | Development | Development | C | extracellular space                                                      |
| 544 | GO:0031234 | Development | Development | C | extrinsic component of cytoplasmic side of plasma membrane               |
| 545 | GO:0042406 | Development | Development | C | extrinsic component of endoplasmic reticulum membrane                    |
| 546 | GO:0010582 | Development | Development | P | floral meristem determinacy                                              |
| 547 | GO:0048437 | Development | Development | P | floral organ development                                                 |
| 548 | GO:0048449 | Development | Development | P | floral organ formation                                                   |
| 549 | GO:0048444 | Development | Development | P | floral organ morphogenesis                                               |
| 550 | GO:0048438 | Development | Development | P | floral whorl development                                                 |
| 551 | GO:0009908 | Development | Development | P | flower development                                                       |
| 552 | GO:0048041 | Development | Development | P | focal adhesion assembly                                                  |
| 553 | GO:0010154 | Development | Development | P | fruit development                                                        |
| 554 | GO:1990058 | Development | Development | P | fruit replum development                                                 |
| 555 | GO:0009835 | Development | Development | P | fruit ripening                                                           |
| 556 | GO:0080127 | Development | Development | P | fruit septum development                                                 |
| 557 | GO:0000930 | Development | Development | C | gamma-tubulin complex                                                    |
| 558 | GO:0033566 | Development | Development | P | gamma-tubulin complex localization                                       |
| 559 | GO:0008274 | Development | Development | C | gamma-tubulin ring complex                                               |
| 560 | GO:0000137 | Development | Development | C | Golgi cis cisterna                                                       |
| 561 | GO:0031985 | Development | Development | C | Golgi cisterna                                                           |
| 562 | GO:0005796 | Development | Development | C | Golgi lumen                                                              |
| 563 | GO:0005797 | Development | Development | C | Golgi medial cisterna                                                    |
| 564 | GO:0007030 | Development | Development | P | Golgi organization                                                       |
| 565 | GO:0005795 | Development | Development | C | Golgi stack                                                              |
| 566 | GO:0098791 | Development | Development | C | Golgi subcompartment                                                     |
| 567 | GO:0000138 | Development | Development | C | Golgi trans cisterna                                                     |
| 568 | GO:0030660 | Development | Development | C | Golgi-associated vesicle membrane                                        |
| 569 | GO:0006505 | Development | Development | P | GPI anchor metabolic process                                             |
| 570 | GO:0090391 | Development | Development | P | granum assembly                                                          |
| 571 | GO:0035838 | Development | Development | C | growing cell tip                                                         |
| 572 | GO:0040007 | Development | Development | P | growth                                                                   |
| 573 | GO:0010052 | Development | Development | P | guard cell differentiation                                               |
| 574 | GO:0010442 | Development | Development | P | guard cell morphogenesis                                                 |
| 575 | GO:0010444 | Development | Development | P | guard mother cell differentiation                                        |
| 576 | GO:0048467 | Development | Development | P | gynoecium development                                                    |
| 577 | GO:0010410 | Development | Development | P | hemicellulose metabolic process                                          |
| 578 | GO:0000792 | Development | Development | C | heterochromatin                                                          |
| 579 | GO:0031507 | Development | Development | P | heterochromatin assembly                                                 |
| 580 | GO:0070828 | Development | Development | P | heterochromatin organization                                             |
| 581 | GO:0043657 | Development | Development | C | host cell                                                                |
| 582 | GO:0042025 | Development | Development | C | host cell nucleus                                                        |
| 583 | GO:0033643 | Development | Development | C | host cell part                                                           |
| 584 | GO:0018995 | Development | Development | C | host cellular component                                                  |
| 585 | GO:0033648 | Development | Development | C | host intracellular membrane-bounded organelle                            |
| 586 | GO:0033647 | Development | Development | C | host intracellular organelle                                             |
| 587 | GO:0033646 | Development | Development | C | host intracellular part                                                  |
| 588 | GO:0043656 | Development | Development | C | host intracellular region                                                |
| 589 | GO:0048283 | Development | Development | P | indeterminate inflorescence morphogenesis                                |
| 590 | GO:0010229 | Development | Development | P | inflorescence development                                                |
| 591 | GO:0010450 | Development | Development | P | inflorescence meristem growth                                            |
| 592 | GO:0048281 | Development | Development | P | inflorescence morphogenesis                                              |
| 593 | GO:0071458 | Development | Development | C | integral component of cytoplasmic side of endoplasmic reticulum membrane |
| 594 | GO:0030176 | Development | Development | C | integral component of endoplasmic reticulum membrane                     |
| 595 | GO:0071556 | Development | Development | C | integral component of luminal side of endoplasmic reticulum membrane     |
| 596 | GO:0016021 | Development | Development | C | integral component of membrane                                           |
| 597 | GO:0005887 | Development | Development | C | integral component of plasma membrane                                    |
| 598 | GO:0080060 | Development | Development | P | integument development                                                   |
| 599 | GO:0031021 | Development | Development | C | interphase microtubule organizing center                                 |
| 600 | GO:0005622 | Development | Development | C | intracellular                                                            |
| 601 | GO:0043231 | Development | Development | C | intracellular membrane-bounded organelle                                 |
| 602 | GO:0043232 | Development | Development | C | intracellular non-membrane-bounded organelle                             |
| 603 | GO:0043229 | Development | Development | C | intracellular organelle                                                  |
| 604 | GO:0070013 | Development | Development | C | intracellular organelle lumen                                            |
| 605 | GO:0097708 | Development | Development | C | intracellular vesicle                                                    |
| 606 | GO:0070676 | Development | Development | P | intraluminal vesicle formation                                           |
| 607 | GO:0005828 | Development | Development | C | kinetochore microtubule                                                  |
| 608 | GO:0005770 | Development | Development | C | late endosome                                                            |
| 609 | GO:0031902 | Development | Development | C | late endosome membrane                                                   |
| 610 | GO:0016328 | Development | Development | C | lateral plasma membrane                                                  |
| 611 | GO:0048527 | Development | Development | P | lateral root development                                                 |
| 612 | GO:0010311 | Development | Development | P | lateral root formation                                                   |
| 613 | GO:0010102 | Development | Development | P | lateral root morphogenesis                                               |
| 614 | GO:0048366 | Development | Development | P | leaf development                                                         |
| 615 | GO:0010338 | Development | Development | P | leaf formation                                                           |
| 616 | GO:0009965 | Development | Development | P | leaf morphogenesis                                                       |
| 617 | GO:0060772 | Development | Development | P | leaf phyllotactic patterning                                             |
| 618 | GO:0010358 | Development | Development | P | leaf shaping                                                             |
| 619 | GO:0010305 | Development | Development | P | leaf vascular tissue pattern formation                                   |



|     |            |             |             |   |                                                                                           |
|-----|------------|-------------|-------------|---|-------------------------------------------------------------------------------------------|
| 620 | GO:0005811 | Development | Development | C | lipid droplet                                                                             |
| 621 | GO:0009942 | Development | Development | P | longitudinal axis specification                                                           |
| 622 | GO:0005765 | Development | Development | C | lysosomal membrane                                                                        |
| 623 | GO:0000323 | Development | Development | C | lytic vacuole                                                                             |
| 624 | GO:0000327 | Development | Development | C | lytic vacuole within protein storage vacuole                                              |
| 625 | GO:0010076 | Development | Development | P | maintenance of floral meristem identity                                                   |
| 626 | GO:0048497 | Development | Development | P | maintenance of floral organ identity                                                      |
| 627 | GO:0010077 | Development | Development | P | maintenance of inflorescence meristem identity                                            |
| 628 | GO:0010074 | Development | Development | P | maintenance of meristem identity                                                          |
| 629 | GO:0090700 | Development | Development | P | maintenance of plant organ identity                                                       |
| 630 | GO:0010078 | Development | Development | P | maintenance of root meristem identity                                                     |
| 631 | GO:0010492 | Development | Development | P | maintenance of shoot apical meristem identity                                             |
| 632 | GO:0080173 | Development | Development | P | male-female gamete recognition during double fertilization forming a zygote and endosperm |
| 633 | GO:0016020 | Development | Development | C | membrane                                                                                  |
| 634 | GO:0061025 | Development | Development | P | membrane fusion                                                                           |
| 635 | GO:0061024 | Development | Development | P | membrane organization                                                                     |
| 636 | GO:0098796 | Development | Development | C | membrane protein complex                                                                  |
| 637 | GO:0043227 | Development | Development | C | membrane-bounded organelle                                                                |
| 638 | GO:0031974 | Development | Development | C | membrane-enclosed lumen                                                                   |
| 639 | GO:0010022 | Development | Development | P | meristem determinacy                                                                      |
| 640 | GO:0048507 | Development | Development | P | meristem development                                                                      |
| 641 | GO:0035266 | Development | Development | P | meristem growth                                                                           |
| 642 | GO:0010014 | Development | Development | P | meristem initiation                                                                       |
| 643 | GO:0010073 | Development | Development | P | meristem maintenance                                                                      |
| 644 | GO:0009933 | Development | Development | P | meristem structural organization                                                          |
| 645 | GO:0042579 | Development | Development | C | microbody                                                                                 |
| 646 | GO:0031903 | Development | Development | C | microbody membrane                                                                        |
| 647 | GO:0005874 | Development | Development | C | microtubule                                                                               |
| 648 | GO:0005875 | Development | Development | C | microtubule associated complex                                                            |
| 649 | GO:0001578 | Development | Development | P | microtubule bundle formation                                                              |
| 650 | GO:0015630 | Development | Development | C | microtubule cytoskeleton                                                                  |
| 651 | GO:0000226 | Development | Development | P | microtubule cytoskeleton organization                                                     |
| 652 | GO:0007020 | Development | Development | P | microtubule nucleation                                                                    |
| 653 | GO:0051415 | Development | Development | P | microtubule nucleation by interphase microtubule organizing center                        |
| 654 | GO:0051418 | Development | Development | P | microtubule nucleation by microtubule organizing center                                   |
| 655 | GO:0005815 | Development | Development | C | microtubule organizing center                                                             |
| 656 | GO:0035371 | Development | Development | C | microtubule plus-end                                                                      |
| 657 | GO:0046785 | Development | Development | P | microtubule polymerization                                                                |
| 658 | GO:0007018 | Development | Development | P | microtubule-based movement                                                                |
| 659 | GO:0007017 | Development | Development | P | microtubule-based process                                                                 |
| 660 | GO:0012511 | Development | Development | C | monolayer-surrounded lipid storage body                                                   |
| 661 | GO:0042814 | Development | Development | P | monopolar cell growth                                                                     |
| 662 | GO:0006928 | Development | Development | P | movement of cell or subcellular component                                                 |
| 663 | GO:0080001 | Development | Development | P | mucilage extrusion from seed coat                                                         |
| 664 | GO:0007275 | Development | Development | P | multicellular organism development                                                        |
| 665 | GO:0035264 | Development | Development | P | multicellular organism growth                                                             |
| 666 | GO:0009825 | Development | Development | P | multidimensional cell growth                                                              |
| 667 | GO:0044706 | Development | Development | P | multi-multicellular organism process                                                      |
| 668 | GO:0005771 | Development | Development | C | multivesicular body                                                                       |
| 669 | GO:0016459 | Development | Development | C | myosin complex                                                                            |
| 670 | GO:0071836 | Development | Development | P | nectar secretion                                                                          |
| 671 | GO:0043228 | Development | Development | C | non-membrane-bounded organelle                                                            |
| 672 | GO:0016604 | Development | Development | C | nuclear body                                                                              |
| 673 | GO:0005846 | Development | Development | C | nuclear cap binding complex                                                               |
| 674 | GO:0000790 | Development | Development | C | nuclear chromatin                                                                         |
| 675 | GO:0000228 | Development | Development | C | nuclear chromosome                                                                        |
| 676 | GO:0000784 | Development | Development | C | nuclear chromosome, telomeric region                                                      |
| 677 | GO:0000799 | Development | Development | C | nuclear condensin complex                                                                 |
| 678 | GO:0010445 | Development | Development | C | nuclear dicing body                                                                       |
| 679 | GO:0005635 | Development | Development | C | nuclear envelope                                                                          |
| 680 | GO:0005719 | Development | Development | C | nuclear euchromatin                                                                       |
| 681 | GO:0000176 | Development | Development | C | nuclear exosome (RNase complex)                                                           |
| 682 | GO:0005652 | Development | Development | C | nuclear lamina                                                                            |
| 683 | GO:0031981 | Development | Development | C | nuclear lumen                                                                             |
| 684 | GO:0016363 | Development | Development | C | nuclear matrix                                                                            |
| 685 | GO:0031965 | Development | Development | C | nuclear membrane                                                                          |
| 686 | GO:0000818 | Development | Development | C | nuclear MIS12/MIND complex                                                                |
| 687 | GO:0005640 | Development | Development | C | nuclear outer membrane                                                                    |
| 688 | GO:0042175 | Development | Development | C | nuclear outer membrane-endoplasmic reticulum membrane network                             |
| 689 | GO:0034399 | Development | Development | C | nuclear periphery                                                                         |
| 690 | GO:0005643 | Development | Development | C | nuclear pore                                                                              |
| 691 | GO:0044611 | Development | Development | C | nuclear pore inner ring                                                                   |
| 692 | GO:0006999 | Development | Development | P | nuclear pore organization                                                                 |
| 693 | GO:0031080 | Development | Development | C | nuclear pore outer ring                                                                   |
| 694 | GO:0005656 | Development | Development | C | nuclear pre-replicative complex                                                           |
| 695 | GO:0043601 | Development | Development | C | nuclear replisome                                                                         |
| 696 | GO:0090305 | Development | Development | P | nucleic acid phosphodiester bond hydrolysis                                               |

|     |            |             |             |   |                                                                            |
|-----|------------|-------------|-------------|---|----------------------------------------------------------------------------|
| 697 | GO:0009295 | Development | Development | C | nucleoid                                                                   |
| 698 | GO:0007000 | Development | Development | P | nucleolus organization                                                     |
| 699 | GO:0005654 | Development | Development | C | nucleoplasm                                                                |
| 700 | GO:0005634 | Development | Development | C | nucleus                                                                    |
| 701 | GO:0006997 | Development | Development | P | nucleus organization                                                       |
| 702 | GO:0035265 | Development | Development | P | organ growth                                                               |
| 703 | GO:0043226 | Development | Development | C | organelle                                                                  |
| 704 | GO:0070925 | Development | Development | P | organelle assembly                                                         |
| 705 | GO:0031967 | Development | Development | C | organelle envelope                                                         |
| 706 | GO:0031970 | Development | Development | C | organelle envelope lumen                                                   |
| 707 | GO:0048285 | Development | Development | P | organelle fission                                                          |
| 708 | GO:0019866 | Development | Development | C | organelle inner membrane                                                   |
| 709 | GO:0051640 | Development | Development | P | organelle localization                                                     |
| 710 | GO:0043233 | Development | Development | C | organelle lumen                                                            |
| 711 | GO:0031090 | Development | Development | C | organelle membrane                                                         |
| 712 | GO:0006996 | Development | Development | P | organelle organization                                                     |
| 713 | GO:0031984 | Development | Development | C | organelle subcompartment                                                   |
| 714 | GO:0007389 | Development | Development | P | pattern specification process                                              |
| 715 | GO:0048471 | Development | Development | C | perinuclear region of cytoplasm                                            |
| 716 | GO:0048441 | Development | Development | P | petal development                                                          |
| 717 | GO:0080172 | Development | Development | P | petal epidermis patterning                                                 |
| 718 | GO:0048446 | Development | Development | P | petal morphogenesis                                                        |
| 719 | GO:0045335 | Development | Development | C | phagocytic vesicle                                                         |
| 720 | GO:0010088 | Development | Development | P | phloem development                                                         |
| 721 | GO:0090449 | Development | Development | P | phloem glucosinolate loading                                               |
| 722 | GO:0110126 | Development | Development | P | phloem loading                                                             |
| 723 | GO:0010087 | Development | Development | P | phloem or xylem histogenesis                                               |
| 724 | GO:0000719 | Development | Development | P | photoreactive repair                                                       |
| 725 | GO:0009524 | Development | Development | C | phragmoplast                                                               |
| 726 | GO:0048827 | Development | Development | P | phyllome development                                                       |
| 727 | GO:0060771 | Development | Development | P | phyllotactic patterning                                                    |
| 728 | GO:0090627 | Development | Development | P | plant epidermal cell differentiation                                       |
| 729 | GO:0090626 | Development | Development | P | plant epidermis morphogenesis                                              |
| 730 | GO:0099402 | Development | Development | P | plant organ development                                                    |
| 731 | GO:1905392 | Development | Development | P | plant organ morphogenesis                                                  |
| 732 | GO:0048481 | Development | Development | P | plant ovule development                                                    |
| 733 | GO:0009505 | Development | Development | C | plant-type cell wall                                                       |
| 734 | GO:0009832 | Development | Development | P | plant-type cell wall biogenesis                                            |
| 735 | GO:0009828 | Development | Development | P | plant-type cell wall loosening                                             |
| 736 | GO:0009827 | Development | Development | P | plant-type cell wall modification                                          |
| 737 | GO:0009831 | Development | Development | P | plant-type cell wall modification involved in multidimensional cell growth |
| 738 | GO:0009664 | Development | Development | P | plant-type cell wall organization                                          |
| 739 | GO:0071669 | Development | Development | P | plant-type cell wall organization or biogenesis                            |
| 740 | GO:0035670 | Development | Development | P | plant-type ovary development                                               |
| 741 | GO:0009833 | Development | Development | P | plant-type primary cell wall biogenesis                                    |
| 742 | GO:0009834 | Development | Development | P | plant-type secondary cell wall biogenesis                                  |
| 743 | GO:0000325 | Development | Development | C | plant-type vacuole                                                         |
| 744 | GO:0009705 | Development | Development | C | plant-type vacuole membrane                                                |
| 745 | GO:0005886 | Development | Development | C | plasma membrane                                                            |
| 746 | GO:0120025 | Development | Development | C | plasma membrane bounded cell projection                                    |
| 747 | GO:0007009 | Development | Development | P | plasma membrane organization                                               |
| 748 | GO:0098590 | Development | Development | C | plasma membrane region                                                     |
| 749 | GO:0009663 | Development | Development | P | plasmodesma organization                                                   |
| 750 | GO:0009511 | Development | Development | C | plasmodesmatal endoplasmic reticulum                                       |
| 751 | GO:0016605 | Development | Development | C | PML body                                                                   |
| 752 | GO:0043078 | Development | Development | C | polar nucleus                                                              |
| 753 | GO:0009944 | Development | Development | P | polarity specification of adaxial/abaxial axis                             |
| 754 | GO:0009555 | Development | Development | P | pollen development                                                         |
| 755 | GO:0010584 | Development | Development | P | pollen exine formation                                                     |
| 756 | GO:0010152 | Development | Development | P | pollen maturation                                                          |
| 757 | GO:0090406 | Development | Development | C | pollen tube                                                                |
| 758 | GO:0090404 | Development | Development | C | pollen tube tip                                                            |
| 759 | GO:0010208 | Development | Development | P | pollen wall assembly                                                       |
| 760 | GO:0099513 | Development | Development | C | polymeric cytoskeletal fiber                                               |
| 761 | GO:0009791 | Development | Development | P | post-embryonic development                                                 |
| 762 | GO:0090698 | Development | Development | P | post-embryonic plant morphogenesis                                         |
| 763 | GO:0048528 | Development | Development | P | post-embryonic root development                                            |
| 764 | GO:0009530 | Development | Development | C | primary cell wall                                                          |
| 765 | GO:0080022 | Development | Development | P | primary root development                                                   |
| 766 | GO:0010072 | Development | Development | P | primary shoot apical meristem specification                                |
| 767 | GO:0010067 | Development | Development | P | procambium histogenesis                                                    |
| 768 | GO:0061919 | Development | Development | P | process utilizing autophagic mechanism                                     |
| 769 | GO:0000326 | Development | Development | C | protein storage vacuole                                                    |
| 770 | GO:0032586 | Development | Development | C | protein storage vacuole membrane                                           |
| 771 | GO:1990019 | Development | Development | P | protein storage vacuole organization                                       |
| 772 | GO:0009946 | Development | Development | P | proximal/distal axis specification                                         |
| 773 | GO:1904961 | Development | Development | P | quiescent center organization                                              |
| 774 | GO:0010245 | Development | Development | P | radial microtubular system formation                                       |

|     |            |             |             |   |                                            |
|-----|------------|-------------|-------------|---|--------------------------------------------|
| 775 | GO:0009956 | Development | Development | P | radial pattern formation                   |
| 776 | GO:0055038 | Development | Development | C | recycling endosome membrane                |
| 777 | GO:0003002 | Development | Development | P | regionalization                            |
| 778 | GO:0090567 | Development | Development | P | reproductive shoot system development      |
| 779 | GO:0048608 | Development | Development | P | reproductive structure development         |
| 780 | GO:0061458 | Development | Development | P | reproductive system development            |
| 781 | GO:0048829 | Development | Development | P | root cap development                       |
| 782 | GO:0048364 | Development | Development | P | root development                           |
| 783 | GO:0010053 | Development | Development | P | root epidermal cell differentiation        |
| 784 | GO:0035618 | Development | Development | C | root hair                                  |
| 785 | GO:0080147 | Development | Development | P | root hair cell development                 |
| 786 | GO:0048768 | Development | Development | P | root hair cell tip growth                  |
| 787 | GO:0048767 | Development | Development | P | root hair elongation                       |
| 788 | GO:0048766 | Development | Development | P | root hair initiation                       |
| 789 | GO:0010449 | Development | Development | P | root meristem growth                       |
| 790 | GO:0010015 | Development | Development | P | root morphogenesis                         |
| 791 | GO:0090057 | Development | Development | P | root radial pattern formation              |
| 792 | GO:0031209 | Development | Development | C | SCAR complex                               |
| 793 | GO:0010223 | Development | Development | P | secondary shoot formation                  |
| 794 | GO:0080191 | Development | Development | P | secondary thickening                       |
| 795 | GO:0046903 | Development | Development | P | secretion                                  |
| 796 | GO:0032940 | Development | Development | P | secretion by cell                          |
| 797 | GO:0010214 | Development | Development | P | seed coat development                      |
| 798 | GO:0048316 | Development | Development | P | seed development                           |
| 799 | GO:0010162 | Development | Development | P | seed dormancy process                      |
| 800 | GO:0009845 | Development | Development | P | seed germination                           |
| 801 | GO:0080112 | Development | Development | P | seed growth                                |
| 802 | GO:0010431 | Development | Development | P | seed maturation                            |
| 803 | GO:0010344 | Development | Development | P | seed oilbody biogenesis                    |
| 804 | GO:0090351 | Development | Development | P | seedling development                       |
| 805 | GO:1902182 | Development | Development | P | shoot apical meristem development          |
| 806 | GO:0048367 | Development | Development | P | shoot system development                   |
| 807 | GO:0010016 | Development | Development | P | shoot system morphogenesis                 |
| 808 | GO:0048756 | Development | Development | P | sieve cell differentiation                 |
| 809 | GO:0060776 | Development | Development | P | simple leaf morphogenesis                  |
| 810 | GO:0030427 | Development | Development | C | site of polarized growth                   |
| 811 | GO:0009647 | Development | Development | P | skotomorphogenesis                         |
| 812 | GO:0035019 | Development | Development | P | somatic stem cell population maintenance   |
| 813 | GO:0010093 | Development | Development | P | specification of floral organ identity     |
| 814 | GO:0048833 | Development | Development | P | specification of floral organ number       |
| 815 | GO:0090708 | Development | Development | P | specification of plant organ axis polarity |
| 816 | GO:0090701 | Development | Development | P | specification of plant organ identity      |
| 817 | GO:0090706 | Development | Development | P | specification of plant organ position      |
| 818 | GO:0009799 | Development | Development | P | specification of symmetry                  |
| 819 | GO:0048443 | Development | Development | P | stamen development                         |
| 820 | GO:0080086 | Development | Development | P | stamen filament development                |
| 821 | GO:0010479 | Development | Development | P | stele development                          |
| 822 | GO:0019827 | Development | Development | P | stem cell population maintenance           |
| 823 | GO:0010222 | Development | Development | P | stem vascular tissue pattern formation     |
| 824 | GO:0048480 | Development | Development | P | stigma development                         |
| 825 | GO:0010374 | Development | Development | P | stomatal complex development               |
| 826 | GO:0010376 | Development | Development | P | stomatal complex formation                 |
| 827 | GO:0010103 | Development | Development | P | stomatal complex morphogenesis             |
| 828 | GO:0010375 | Development | Development | P | stomatal complex patterning                |
| 829 | GO:0010440 | Development | Development | P | stomatal lineage progression               |
| 830 | GO:1990069 | Development | Development | P | stomatal opening                           |
| 831 | GO:0080166 | Development | Development | P | stomium development                        |
| 832 | GO:0010319 | Development | Development | C | stromule                                   |
| 833 | GO:0005199 | Development | Development | F | structural constituent of cell wall        |
| 834 | GO:0030527 | Development | Development | F | structural constituent of chromatin        |
| 835 | GO:0005200 | Development | Development | F | structural constituent of cytoskeleton     |
| 836 | GO:0017056 | Development | Development | F | structural constituent of nuclear pore     |
| 837 | GO:0005198 | Development | Development | F | structural molecule activity               |
| 838 | GO:0010098 | Development | Development | P | suspensor development                      |
| 839 | GO:0055044 | Development | Development | C | sympplast                                  |
| 840 | GO:0048731 | Development | Development | P | system development                         |
| 841 | GO:0003008 | Development | Development | P | system process                             |
| 842 | GO:0009888 | Development | Development | P | tissue development                         |
| 843 | GO:0032588 | Development | Development | C | trans-Golgi network membrane               |
| 844 | GO:0010500 | Development | Development | P | transmitting tissue development            |
| 845 | GO:0010148 | Development | Development | P | transpiration                              |
| 846 | GO:0010091 | Development | Development | P | trichome branching                         |
| 847 | GO:0010026 | Development | Development | P | trichome differentiation                   |
| 848 | GO:0010090 | Development | Development | P | trichome morphogenesis                     |
| 849 | GO:1905499 | Development | Development | P | trichome papilla formation                 |
| 850 | GO:0048629 | Development | Development | P | trichome patterning                        |
| 851 | GO:0007021 | Development | Development | P | tubulin complex assembly                   |
| 852 | GO:0009826 | Development | Development | P | unidimensional cell growth                 |

|     |            |             |               |   |                                                                        |
|-----|------------|-------------|---------------|---|------------------------------------------------------------------------|
| 853 | GO:0005775 | Development | Development   | C | vacuolar lumen                                                         |
| 854 | GO:0005774 | Development | Development   | C | vacuolar membrane                                                      |
| 855 | GO:0005773 | Development | Development   | C | vacuole                                                                |
| 856 | GO:0003018 | Development | Development   | P | vascular process in circulatory system                                 |
| 857 | GO:0001944 | Development | Development   | P | vasculature development                                                |
| 858 | GO:0010228 | Development | Development   | P | vegetative to reproductive phase transition of meristem                |
| 859 | GO:0006900 | Development | Development   | P | vesicle budding from membrane                                          |
| 860 | GO:0048278 | Development | Development   | P | vesicle docking                                                        |
| 861 | GO:0006906 | Development | Development   | P | vesicle fusion                                                         |
| 862 | GO:0048280 | Development | Development   | P | vesicle fusion with Golgi apparatus                                    |
| 863 | GO:0012506 | Development | Development   | C | vesicle membrane                                                       |
| 864 | GO:0090522 | Development | Development   | P | vesicle tethering involved in exocytosis                               |
| 865 | GO:0019034 | Development | Development   | C | viral replication complex                                              |
| 866 | GO:0010051 | Development | Development   | P | xylem and phloem pattern formation                                     |
| 867 | GO:0035798 | Metabolism  | Bioenergetics | F | 2-alkenal reductase (NADP+) activity                                   |
| 868 | GO:0032440 | Metabolism  | Bioenergetics | F | 2-alkenal reductase [NAD(P)+] activity                                 |
| 869 | GO:0004316 | Metabolism  | Bioenergetics | F | 3-oxoacyl-[acyl-carrier-protein] reductase (NADPH) activity            |
| 870 | GO:0102339 | Metabolism  | Bioenergetics | F | 3-oxo-arachidoyl-CoA reductase activity                                |
| 871 | GO:0102336 | Metabolism  | Bioenergetics | F | 3-oxo-arachidoyl-CoA synthase activity                                 |
| 872 | GO:0102340 | Metabolism  | Bioenergetics | F | 3-oxo-behenoyl-CoA reductase activity                                  |
| 873 | GO:0102342 | Metabolism  | Bioenergetics | F | 3-oxo-cerotoyl-CoA reductase activity                                  |
| 874 | GO:0102337 | Metabolism  | Bioenergetics | F | 3-oxo-cerotoyl-CoA synthase activity                                   |
| 875 | GO:0102131 | Metabolism  | Bioenergetics | F | 3-oxo-glutaryl-[acp] methyl ester reductase activity                   |
| 876 | GO:0102338 | Metabolism  | Bioenergetics | F | 3-oxo-lignoceronoyl-CoA synthase activity                              |
| 877 | GO:0102341 | Metabolism  | Bioenergetics | F | 3-oxo-lignoceroyl-CoA reductase activity                               |
| 878 | GO:0102132 | Metabolism  | Bioenergetics | F | 3-oxo-pimeloyl-[acp] methyl ester reductase activity                   |
| 879 | GO:0003866 | Metabolism  | Bioenergetics | F | 3-phosphoshikimate 1-carboxyvinyltransferase activity                  |
| 880 | GO:0016207 | Metabolism  | Bioenergetics | F | 4-coumarate-CoA ligase activity                                        |
| 881 | GO:0003872 | Metabolism  | Bioenergetics | F | 6-phosphofructokinase activity                                         |
| 882 | GO:0003987 | Metabolism  | Bioenergetics | F | acetate-CoA ligase activity                                            |
| 883 | GO:0018454 | Metabolism  | Bioenergetics | F | acetoacetyl-CoA reductase activity                                     |
| 884 | GO:0010327 | Metabolism  | Bioenergetics | F | acetyl CoA:(Z)-3-hexen-1-ol acetyltransferase activity                 |
| 885 | GO:0006085 | Metabolism  | Bioenergetics | P | acetyl-CoA biosynthetic process                                        |
| 886 | GO:0019427 | Metabolism  | Bioenergetics | P | acetyl-CoA biosynthetic process from acetate                           |
| 887 | GO:0006086 | Metabolism  | Bioenergetics | P | acetyl-CoA biosynthetic process from pyruvate                          |
| 888 | GO:0003988 | Metabolism  | Bioenergetics | F | acetyl-CoA C-acyltransferase activity                                  |
| 889 | GO:0003989 | Metabolism  | Bioenergetics | F | acetyl-CoA carboxylase activity                                        |
| 890 | GO:0009317 | Metabolism  | Bioenergetics | C | acetyl-CoA carboxylase complex                                         |
| 891 | GO:0006084 | Metabolism  | Bioenergetics | P | acetyl-CoA metabolic process                                           |
| 892 | GO:0004042 | Metabolism  | Bioenergetics | F | acetyl-CoA:L-glutamate N-acetyltransferase activity                    |
| 893 | GO:0071616 | Metabolism  | Bioenergetics | P | acyl-CoA biosynthetic process                                          |
| 894 | GO:0003995 | Metabolism  | Bioenergetics | F | acyl-CoA dehydrogenase activity                                        |
| 895 | GO:0047617 | Metabolism  | Bioenergetics | F | acyl-CoA hydrolase activity                                            |
| 896 | GO:0003996 | Metabolism  | Bioenergetics | F | acyl-CoA ligase activity                                               |
| 897 | GO:0006637 | Metabolism  | Bioenergetics | P | acyl-CoA metabolic process                                             |
| 898 | GO:0003997 | Metabolism  | Bioenergetics | F | acyl-CoA oxidase activity                                              |
| 899 | GO:0043531 | Metabolism  | Bioenergetics | F | ADP binding                                                            |
| 900 | GO:0046031 | Metabolism  | Bioenergetics | P | ADP metabolic process                                                  |
| 901 | GO:0080042 | Metabolism  | Bioenergetics | F | ADP-glucose pyrophosphohydrolase activity                              |
| 902 | GO:0102502 | Metabolism  | Bioenergetics | F | ADP-glucose-starch glucosyltransferase activity                        |
| 903 | GO:0047631 | Metabolism  | Bioenergetics | F | ADP-ribose diphosphatase activity                                      |
| 904 | GO:0080041 | Metabolism  | Bioenergetics | F | ADP-ribose pyrophosphohydrolase activity                               |
| 905 | GO:0009060 | Metabolism  | Bioenergetics | P | aerobic respiration                                                    |
| 906 | GO:0004022 | Metabolism  | Bioenergetics | F | alcohol dehydrogenase (NAD+) activity                                  |
| 907 | GO:0008106 | Metabolism  | Bioenergetics | F | alcohol dehydrogenase (NADP+) activity                                 |
| 908 | GO:0004029 | Metabolism  | Bioenergetics | F | aldehyde dehydrogenase (NAD+) activity                                 |
| 909 | GO:0004030 | Metabolism  | Bioenergetics | F | aldehyde dehydrogenase [NAD(P)+] activity                              |
| 910 | GO:0004032 | Metabolism  | Bioenergetics | F | alditol:NADP+ 1-oxidoreductase activity                                |
| 911 | GO:0004033 | Metabolism  | Bioenergetics | F | aldo-keto reductase (NADP) activity                                    |
| 912 | GO:0004555 | Metabolism  | Bioenergetics | F | alpha,alpha-trehalase activity                                         |
| 913 | GO:0003825 | Metabolism  | Bioenergetics | F | alpha,alpha-trehalose-phosphate synthase (UDP-forming) activity        |
| 914 | GO:0004556 | Metabolism  | Bioenergetics | F | alpha-amylase activity                                                 |
| 915 | GO:0103025 | Metabolism  | Bioenergetics | F | alpha-amylase activity (releasing maltohexaose)                        |
| 916 | GO:0102966 | Metabolism  | Bioenergetics | F | arachidoyl-CoA:1-dodecanol O-acyltransferase activity                  |
| 917 | GO:0047681 | Metabolism  | Bioenergetics | F | aryl-alcohol dehydrogenase (NADP+) activity                            |
| 918 | GO:0006754 | Metabolism  | Bioenergetics | P | ATP biosynthetic process                                               |
| 919 | GO:0003878 | Metabolism  | Bioenergetics | F | ATP citrate synthase activity                                          |
| 920 | GO:0046034 | Metabolism  | Bioenergetics | P | ATP metabolic process                                                  |
| 921 | GO:0003879 | Metabolism  | Bioenergetics | F | ATP phosphoribosyltransferase activity                                 |
| 922 | GO:0042773 | Metabolism  | Bioenergetics | P | ATP synthesis coupled electron transport                               |
| 923 | GO:0015986 | Metabolism  | Bioenergetics | P | ATP synthesis coupled proton transport                                 |
| 924 | GO:0001671 | Metabolism  | Bioenergetics | F | ATPase activator activity                                              |
| 925 | GO:0016887 | Metabolism  | Bioenergetics | F | ATPase activity                                                        |
| 926 | GO:0042623 | Metabolism  | Bioenergetics | F | ATPase activity, coupled                                               |
|     |            |             |               |   | ATPase activity, coupled to transmembrane movement of ions, rotational |
| 927 | GO:0044769 | Metabolism  | Bioenergetics | F | mechanism                                                              |
| 928 | GO:0051117 | Metabolism  | Bioenergetics | F | ATPase binding                                                         |
| 929 | GO:1904949 | Metabolism  | Bioenergetics | C | ATPase complex                                                         |

|      |            |            |               |   |                                                              |
|------|------------|------------|---------------|---|--------------------------------------------------------------|
| 930  | GO:0008569 | Metabolism | Bioenergetics | F | ATP-dependent microtubule motor activity, minus-end-directed |
| 931  | GO:0008574 | Metabolism | Bioenergetics | F | ATP-dependent microtubule motor activity, plus-end-directed  |
| 932  | GO:0016161 | Metabolism | Bioenergetics | F | beta-amylase activity                                        |
| 933  | GO:0042409 | Metabolism | Bioenergetics | F | caffeoyl-CoA O-methyltransferase activity                    |
| 934  | GO:0030246 | Metabolism | Bioenergetics | F | carbohydrate binding                                         |
| 935  | GO:0016051 | Metabolism | Bioenergetics | P | carbohydrate biosynthetic process                            |
| 936  | GO:0016052 | Metabolism | Bioenergetics | P | carbohydrate catabolic process                               |
| 937  | GO:0097367 | Metabolism | Bioenergetics | F | carbohydrate derivative binding                              |
| 938  | GO:1901137 | Metabolism | Bioenergetics | P | carbohydrate derivative biosynthetic process                 |
| 939  | GO:1901135 | Metabolism | Bioenergetics | P | carbohydrate derivative metabolic process                    |
| 940  | GO:0019200 | Metabolism | Bioenergetics | F | carbohydrate kinase activity                                 |
| 941  | GO:0005975 | Metabolism | Bioenergetics | P | carbohydrate metabolic process                               |
| 942  | GO:0019203 | Metabolism | Bioenergetics | F | carbohydrate phosphatase activity                            |
| 943  | GO:0046835 | Metabolism | Bioenergetics | P | carbohydrate phosphorylation                                 |
| 944  | GO:0034637 | Metabolism | Bioenergetics | P | cellular carbohydrate biosynthetic process                   |
| 945  | GO:0044275 | Metabolism | Bioenergetics | P | cellular carbohydrate catabolic process                      |
| 946  | GO:0044262 | Metabolism | Bioenergetics | P | cellular carbohydrate metabolic process                      |
| 947  | GO:0033692 | Metabolism | Bioenergetics | P | cellular polysaccharide biosynthetic process                 |
| 948  | GO:0044264 | Metabolism | Bioenergetics | P | cellular polysaccharide metabolic process                    |
| 949  | GO:0045333 | Metabolism | Bioenergetics | P | cellular respiration                                         |
| 950  | GO:0004108 | Metabolism | Bioenergetics | F | citrate (Si)-synthase activity                               |
| 951  | GO:0009346 | Metabolism | Bioenergetics | C | citrate lyase complex                                        |
| 952  | GO:0006101 | Metabolism | Bioenergetics | P | citrate metabolic process                                    |
| 953  | GO:0016405 | Metabolism | Bioenergetics | F | CoA-ligase activity                                          |
| 954  | GO:0015937 | Metabolism | Bioenergetics | P | coenzyme A biosynthetic process                              |
| 955  | GO:0015936 | Metabolism | Bioenergetics | P | coenzyme A metabolic process                                 |
| 956  | GO:0050662 | Metabolism | Bioenergetics | F | coenzyme binding                                             |
| 957  | GO:0070069 | Metabolism | Bioenergetics | C | cytochrome complex                                           |
| 958  | GO:0017004 | Metabolism | Bioenergetics | P | cytochrome complex assembly                                  |
| 959  | GO:0004129 | Metabolism | Bioenergetics | F | cytochrome-c oxidase activity                                |
| 960  | GO:0006176 | Metabolism | Bioenergetics | P | dATP biosynthetic process from ADP                           |
| 961  | GO:0102391 | Metabolism | Bioenergetics | F | decanoate-CoA ligase activity                                |
| 962  | GO:0016720 | Metabolism | Bioenergetics | F | delta12-fatty acid dehydrogenase activity                    |
| 963  | GO:0102985 | Metabolism | Bioenergetics | F | Delta12-fatty-acid desaturase activity                       |
| 964  | GO:0017113 | Metabolism | Bioenergetics | F | dihydropyrimidine dehydrogenase (NADP+) activity             |
| 965  | GO:0046351 | Metabolism | Bioenergetics | P | disaccharide biosynthetic process                            |
| 966  | GO:0005984 | Metabolism | Bioenergetics | P | disaccharide metabolic process                               |
| 967  | GO:0008094 | Metabolism | Bioenergetics | F | DNA-dependent ATPase activity                                |
| 968  | GO:0009055 | Metabolism | Bioenergetics | F | electron transfer activity                                   |
| 969  | GO:0022900 | Metabolism | Bioenergetics | P | electron transport chain                                     |
| 970  | GO:0015990 | Metabolism | Bioenergetics | P | electron transport coupled proton transport                  |
| 971  | GO:0004174 | Metabolism | Bioenergetics | F | electron-transferring-flavoprotein dehydrogenase activity    |
| 972  | GO:0015980 | Metabolism | Bioenergetics | P | energy derivation by oxidation of organic compounds          |
| 973  | GO:0004300 | Metabolism | Bioenergetics | F | enoyl-CoA hydratase activity                                 |
| 974  | GO:0031314 | Metabolism | Bioenergetics | C | extrinsic component of mitochondrial inner membrane          |
| 975  | GO:0080132 | Metabolism | Bioenergetics | F | fatty acid alpha-hydroxylase activity                        |
| 976  | GO:0001561 | Metabolism | Bioenergetics | P | fatty acid alpha-oxidation                                   |
| 977  | GO:0006635 | Metabolism | Bioenergetics | P | fatty acid beta-oxidation                                    |
| 978  | GO:0033539 | Metabolism | Bioenergetics | P | fatty acid beta-oxidation using acyl-CoA dehydrogenase       |
| 979  | GO:0033540 | Metabolism | Bioenergetics | P | fatty acid beta-oxidation using acyl-CoA oxidase             |
| 980  | GO:0005504 | Metabolism | Bioenergetics | F | fatty acid binding                                           |
| 981  | GO:0006633 | Metabolism | Bioenergetics | P | fatty acid biosynthetic process                              |
| 982  | GO:0009062 | Metabolism | Bioenergetics | P | fatty acid catabolic process                                 |
| 983  | GO:1901570 | Metabolism | Bioenergetics | P | fatty acid derivative biosynthetic process                   |
| 984  | GO:1901568 | Metabolism | Bioenergetics | P | fatty acid derivative metabolic process                      |
| 985  | GO:0009922 | Metabolism | Bioenergetics | F | fatty acid elongase activity                                 |
| 986  | GO:0009923 | Metabolism | Bioenergetics | C | fatty acid elongase complex                                  |
| 987  | GO:0030497 | Metabolism | Bioenergetics | P | fatty acid elongation                                        |
| 988  | GO:0052722 | Metabolism | Bioenergetics | F | fatty acid in-chain hydroxylase activity                     |
| 989  | GO:0015645 | Metabolism | Bioenergetics | F | fatty acid ligase activity                                   |
| 990  | GO:0006631 | Metabolism | Bioenergetics | P | fatty acid metabolic process                                 |
| 991  | GO:0019395 | Metabolism | Bioenergetics | P | fatty acid oxidation                                         |
| 992  | GO:0046949 | Metabolism | Bioenergetics | P | fatty-acyl-CoA biosynthetic process                          |
| 993  | GO:0004321 | Metabolism | Bioenergetics | F | fatty-acyl-CoA synthase activity                             |
| 994  | GO:0008865 | Metabolism | Bioenergetics | F | fructokinase activity                                        |
| 995  | GO:1902334 | Metabolism | Bioenergetics | P | fructose export from vacuole to cytoplasm                    |
| 996  | GO:0006000 | Metabolism | Bioenergetics | P | fructose metabolic process                                   |
| 997  | GO:0006091 | Metabolism | Bioenergetics | P | generation of precursor metabolites and energy               |
| 998  | GO:0006094 | Metabolism | Bioenergetics | P | gluconeogenesis                                              |
| 999  | GO:0051156 | Metabolism | Bioenergetics | P | glucose 6-phosphate metabolic process                        |
| 1000 | GO:0006007 | Metabolism | Bioenergetics | P | glucose catabolic process                                    |
| 1001 | GO:0006006 | Metabolism | Bioenergetics | P | glucose metabolic process                                    |
| 1002 | GO:0008878 | Metabolism | Bioenergetics | F | glucose-1-phosphate adenylyltransferase activity             |
| 1003 | GO:0047938 | Metabolism | Bioenergetics | F | glucose-6-phosphate 1-epimerase activity                     |
| 1004 | GO:0004345 | Metabolism | Bioenergetics | F | glucose-6-phosphate dehydrogenase activity                   |
| 1005 | GO:0004352 | Metabolism | Bioenergetics | F | glutamate dehydrogenase (NAD+) activity                      |
| 1006 | GO:0004353 | Metabolism | Bioenergetics | F | glutamate dehydrogenase [NAD(P)+] activity                   |
| 1007 | GO:0016040 | Metabolism | Bioenergetics | F | glutamate synthase (NADH) activity                           |

|      |            |            |               |   |                                                                                 |
|------|------------|------------|---------------|---|---------------------------------------------------------------------------------|
| 1008 | GO:0043878 | Metabolism | Bioenergetics | F | glyceraldehyde-3-phosphate dehydrogenase (NAD+) (non-phosphorylating) activity  |
| 1009 | GO:0004365 | Metabolism | Bioenergetics | F | glyceraldehyde-3-phosphate dehydrogenase (NAD+) (phosphorylating) activity      |
| 1010 | GO:0008886 | Metabolism | Bioenergetics | F | glyceraldehyde-3-phosphate dehydrogenase (NADP+) (non-phosphorylating) activity |
| 1011 | GO:0047100 | Metabolism | Bioenergetics | F | glyceraldehyde-3-phosphate dehydrogenase (NADP+) (phosphorylating) activity     |
| 1012 | GO:0004373 | Metabolism | Bioenergetics | F | glycogen (starch) synthase activity                                             |
| 1013 | GO:0008891 | Metabolism | Bioenergetics | F | glycolate oxidase activity                                                      |
| 1014 | GO:0006096 | Metabolism | Bioenergetics | P | glycolytic process                                                              |
| 1015 | GO:0006097 | Metabolism | Bioenergetics | P | glyoxylate cycle                                                                |
| 1016 | GO:0030267 | Metabolism | Bioenergetics | F | glyoxylate reductase (NADP) activity                                            |
| 1017 | GO:0046861 | Metabolism | Bioenergetics | C | glyoxysomal membrane                                                            |
| 1018 | GO:0009514 | Metabolism | Bioenergetics | C | glyoxysome                                                                      |
| 1019 | GO:0010111 | Metabolism | Bioenergetics | P | glyoxysome organization                                                         |
| 1020 | GO:0030931 | Metabolism | Bioenergetics | C | heterotetrameric ADPG pyrophosphorylase complex                                 |
| 1021 | GO:0019319 | Metabolism | Bioenergetics | P | hexose biosynthetic process                                                     |
| 1022 | GO:0019318 | Metabolism | Bioenergetics | P | hexose metabolic process                                                        |
| 1023 | GO:0050505 | Metabolism | Bioenergetics | F | hydroquinone glucosyltransferase activity                                       |
| 1024 | GO:0052716 | Metabolism | Bioenergetics | F | hydroquinone:oxygen oxidoreductase activity                                     |
| 1025 | GO:0004419 | Metabolism | Bioenergetics | F | hydroxymethylglutaryl-CoA lyase activity                                        |
| 1026 | GO:0004420 | Metabolism | Bioenergetics | F | hydroxymethylglutaryl-CoA reductase (NADPH) activity                            |
| 1027 | GO:0042282 | Metabolism | Bioenergetics | F | hydroxymethylglutaryl-CoA reductase activity                                    |
| 1028 | GO:0098800 | Metabolism | Bioenergetics | C | inner mitochondrial membrane protein complex                                    |
| 1029 | GO:0031305 | Metabolism | Bioenergetics | C | integral component of mitochondrial inner membrane                              |
| 1030 | GO:0031307 | Metabolism | Bioenergetics | C | integral component of mitochondrial outer membrane                              |
| 1031 | GO:0048312 | Metabolism | Bioenergetics | P | intracellular distribution of mitochondria                                      |
| 1032 | GO:0031304 | Metabolism | Bioenergetics | C | intrinsic component of mitochondrial inner membrane                             |
| 1033 | GO:0004449 | Metabolism | Bioenergetics | F | isocitrate dehydrogenase (NAD+) activity                                        |
| 1034 | GO:0004450 | Metabolism | Bioenergetics | F | isocitrate dehydrogenase (NADP+) activity                                       |
| 1035 | GO:0004448 | Metabolism | Bioenergetics | F | isocitrate dehydrogenase activity                                               |
| 1036 | GO:0006102 | Metabolism | Bioenergetics | P | isocitrate metabolic process                                                    |
| 1037 | GO:0034440 | Metabolism | Bioenergetics | P | lipid oxidation                                                                 |
| 1038 | GO:0030060 | Metabolism | Bioenergetics | F | L-malate dehydrogenase activity                                                 |
| 1039 | GO:0001676 | Metabolism | Bioenergetics | P | long-chain fatty acid metabolic process                                         |
| 1040 | GO:0004467 | Metabolism | Bioenergetics | F | long-chain fatty acid-CoA ligase activity                                       |
| 1041 | GO:0052853 | Metabolism | Bioenergetics | F | long-chain-(S)-2-hydroxy-long-chain-acid oxidase activity                       |
| 1042 | GO:0047196 | Metabolism | Bioenergetics | F | long-chain-alcohol O-fatty-acyltransferase activity                             |
| 1043 | GO:0004471 | Metabolism | Bioenergetics | F | malate dehydrogenase (decarboxylating) (NAD+) activity                          |
| 1044 | GO:0004473 | Metabolism | Bioenergetics | F | malate dehydrogenase (decarboxylating) (NADP+) activity                         |
| 1045 | GO:0046554 | Metabolism | Bioenergetics | F | malate dehydrogenase (NADP+) activity                                           |
| 1046 | GO:0016615 | Metabolism | Bioenergetics | F | malate dehydrogenase activity                                                   |
| 1047 | GO:0006108 | Metabolism | Bioenergetics | P | malate metabolic process                                                        |
| 1048 | GO:0004470 | Metabolism | Bioenergetics | F | malic enzyme activity                                                           |
| 1049 | GO:0090409 | Metabolism | Bioenergetics | F | malonyl-CoA synthetase activity                                                 |
| 1050 | GO:0031956 | Metabolism | Bioenergetics | F | medium-chain fatty acid-CoA ligase activity                                     |
| 1051 | GO:0004485 | Metabolism | Bioenergetics | F | methylcrotonoyl-CoA carboxylase activity                                        |
| 1052 | GO:0004488 | Metabolism | Bioenergetics | F | methylenetetrahydrofolate dehydrogenase (NADP+) activity                        |
| 1053 | GO:0004489 | Metabolism | Bioenergetics | F | methylenetetrahydrofolate reductase (NAD(P)H) activity                          |
| 1054 | GO:0004490 | Metabolism | Bioenergetics | F | methylglutaconyl-CoA hydratase activity                                         |
| 1055 | GO:0005947 | Metabolism | Bioenergetics | C | mitochondrial alpha-ketoglutarate dehydrogenase complex                         |
| 1056 | GO:0042775 | Metabolism | Bioenergetics | P | mitochondrial ATP synthesis coupled electron transport                          |
| 1057 | GO:0042776 | Metabolism | Bioenergetics | P | mitochondrial ATP synthesis coupled proton transport                            |
| 1058 | GO:0006123 | Metabolism | Bioenergetics | P | mitochondrial electron transport, cytochrome c to oxygen                        |
| 1059 | GO:0006120 | Metabolism | Bioenergetics | P | mitochondrial electron transport, NADH to ubiquinone                            |
| 1060 | GO:0006121 | Metabolism | Bioenergetics | P | mitochondrial electron transport, succinate to ubiquinone                       |
| 1061 | GO:0006122 | Metabolism | Bioenergetics | P | mitochondrial electron transport, ubiquinol to cytochrome c                     |
| 1062 | GO:0005740 | Metabolism | Bioenergetics | C | mitochondrial envelope                                                          |
| 1063 | GO:0000266 | Metabolism | Bioenergetics | P | mitochondrial fission                                                           |
| 1064 | GO:0005743 | Metabolism | Bioenergetics | C | mitochondrial inner membrane                                                    |
| 1065 | GO:0005758 | Metabolism | Bioenergetics | C | mitochondrial intermembrane space                                               |
| 1066 | GO:0005759 | Metabolism | Bioenergetics | C | mitochondrial matrix                                                            |
| 1067 | GO:0031966 | Metabolism | Bioenergetics | C | mitochondrial membrane                                                          |
| 1068 | GO:0005741 | Metabolism | Bioenergetics | C | mitochondrial outer membrane                                                    |
| 1069 | GO:0005742 | Metabolism | Bioenergetics | C | mitochondrial outer membrane translocase complex                                |
| 1070 | GO:0017087 | Metabolism | Bioenergetics | C | mitochondrial processing peptidase complex                                      |
| 1071 | GO:0098798 | Metabolism | Bioenergetics | C | mitochondrial protein complex                                                   |
| 1072 | GO:0034982 | Metabolism | Bioenergetics | P | mitochondrial protein processing                                                |
| 1073 | GO:0005753 | Metabolism | Bioenergetics | C | mitochondrial proton-transporting ATP synthase complex                          |
| 1074 | GO:0033615 | Metabolism | Bioenergetics | P | mitochondrial proton-transporting ATP synthase complex assembly                 |
| 1075 | GO:0000275 | Metabolism | Bioenergetics | C | mitochondrial proton-transporting ATP synthase complex, catalytic core F(1)     |
| 1076 | GO:0000276 | Metabolism | Bioenergetics | C | mitochondrial proton-transporting ATP synthase complex, coupling factor F(o)    |
| 1077 | GO:0005754 | Metabolism | Bioenergetics | C | mitochondrial proton-transporting ATP synthase, catalytic core                  |
| 1078 | GO:0000274 | Metabolism | Bioenergetics | C | mitochondrial proton-transporting ATP synthase, stator stalk                    |
| 1079 | GO:0006850 | Metabolism | Bioenergetics | P | mitochondrial pyruvate transmembrane transport                                  |
| 1080 | GO:0005746 | Metabolism | Bioenergetics | C | mitochondrial respirasome                                                       |
| 1081 | GO:0005747 | Metabolism | Bioenergetics | C | mitochondrial respiratory chain complex I                                       |
| 1082 | GO:0032981 | Metabolism | Bioenergetics | P | mitochondrial respiratory chain complex I assembly                              |

|      |            |            |               |   |                                                                                                                                                                                             |
|------|------------|------------|---------------|---|---------------------------------------------------------------------------------------------------------------------------------------------------------------------------------------------|
|      |            |            |               |   | mitochondrial respiratory chain complex II, succinate dehydrogenase complex (ubiquinone)                                                                                                    |
| 1083 | GO:0005749 | Metabolism | Bioenergetics | C | mitochondrial respiratory chain complex III                                                                                                                                                 |
| 1084 | GO:0005750 | Metabolism | Bioenergetics | C | mitochondrial respiratory chain complex III assembly                                                                                                                                        |
| 1085 | GO:0034551 | Metabolism | Bioenergetics | P | mitochondrial respiratory chain complex III assembly                                                                                                                                        |
| 1086 | GO:0005751 | Metabolism | Bioenergetics | C | mitochondrial respiratory chain complex IV                                                                                                                                                  |
| 1087 | GO:0033617 | Metabolism | Bioenergetics | P | mitochondrial respiratory chain complex IV assembly                                                                                                                                         |
| 1088 | GO:0005739 | Metabolism | Bioenergetics | C | mitochondrion                                                                                                                                                                               |
| 1089 | GO:0007005 | Metabolism | Bioenergetics | P | mitochondrion organization                                                                                                                                                                  |
| 1090 | GO:0046364 | Metabolism | Bioenergetics | P | monosaccharide biosynthetic process                                                                                                                                                         |
| 1091 | GO:0051287 | Metabolism | Bioenergetics | F | NAD binding                                                                                                                                                                                 |
| 1092 | GO:0034356 | Metabolism | Bioenergetics | P | NAD biosynthesis via nicotinamide riboside salvage pathway                                                                                                                                  |
| 1093 | GO:0009435 | Metabolism | Bioenergetics | P | NAD biosynthetic process                                                                                                                                                                    |
| 1094 | GO:0008746 | Metabolism | Bioenergetics | F | NAD(P)+ transhydrogenase activity                                                                                                                                                           |
| 1095 | GO:0003955 | Metabolism | Bioenergetics | F | NAD(P)H dehydrogenase (quinone) activity                                                                                                                                                    |
| 1096 | GO:0010598 | Metabolism | Bioenergetics | C | NAD(P)H dehydrogenase complex (plastoquinone)                                                                                                                                               |
| 1097 | GO:0010275 | Metabolism | Bioenergetics | P | NAD(P)H dehydrogenase complex assembly                                                                                                                                                      |
| 1098 | GO:0016174 | Metabolism | Bioenergetics | F | NAD(P)H oxidase activity                                                                                                                                                                    |
| 1099 | GO:0003950 | Metabolism | Bioenergetics | F | NAD+ ADP-ribosyltransferase activity                                                                                                                                                        |
| 1100 | GO:0070403 | Metabolism | Bioenergetics | F | NAD+ binding                                                                                                                                                                                |
| 1101 | GO:0000210 | Metabolism | Bioenergetics | F | NAD+ diphosphatase activity                                                                                                                                                                 |
| 1102 | GO:0008137 | Metabolism | Bioenergetics | F | NADH dehydrogenase (ubiquinone) activity                                                                                                                                                    |
| 1103 | GO:0003954 | Metabolism | Bioenergetics | F | NADH dehydrogenase activity                                                                                                                                                                 |
| 1104 | GO:0030964 | Metabolism | Bioenergetics | C | NADH dehydrogenase complex                                                                                                                                                                  |
| 1105 | GO:0010258 | Metabolism | Bioenergetics | P | NADH dehydrogenase complex (plastoquinone) assembly                                                                                                                                         |
| 1106 | GO:0006734 | Metabolism | Bioenergetics | P | NADH metabolic process                                                                                                                                                                      |
| 1107 | GO:0006116 | Metabolism | Bioenergetics | P | NADH oxidation                                                                                                                                                                              |
| 1108 | GO:0035529 | Metabolism | Bioenergetics | F | NADH pyrophosphatase activity                                                                                                                                                               |
| 1109 | GO:0052856 | Metabolism | Bioenergetics | F | NADHX epimerase activity                                                                                                                                                                    |
| 1110 | GO:0050661 | Metabolism | Bioenergetics | F | NADP binding                                                                                                                                                                                |
| 1111 | GO:0006739 | Metabolism | Bioenergetics | P | NADP metabolic process                                                                                                                                                                      |
| 1112 | GO:0070401 | Metabolism | Bioenergetics | F | NADP+ binding                                                                                                                                                                               |
| 1113 | GO:0070402 | Metabolism | Bioenergetics | F | NADPH binding                                                                                                                                                                               |
| 1114 | GO:0003959 | Metabolism | Bioenergetics | F | NADPH dehydrogenase activity                                                                                                                                                                |
| 1115 | GO:0006740 | Metabolism | Bioenergetics | P | NADPH regeneration                                                                                                                                                                          |
| 1116 | GO:0003958 | Metabolism | Bioenergetics | F | NADPH-hemoprotein reductase activity                                                                                                                                                        |
| 1117 | GO:0052857 | Metabolism | Bioenergetics | F | NADPHX epimerase activity                                                                                                                                                                   |
| 1118 | GO:0031999 | Metabolism | Bioenergetics | P | negative regulation of fatty acid beta-oxidation                                                                                                                                            |
| 1119 | GO:0008942 | Metabolism | Bioenergetics | F | nitrite reductase [NAD(P)H] activity                                                                                                                                                        |
| 1120 | GO:0031588 | Metabolism | Bioenergetics | C | nucleotide-activated protein kinase complex                                                                                                                                                 |
| 1121 | GO:0009312 | Metabolism | Bioenergetics | P | oligosaccharide biosynthetic process                                                                                                                                                        |
| 1122 | GO:0009311 | Metabolism | Bioenergetics | P | oligosaccharide metabolic process                                                                                                                                                           |
| 1123 | GO:0042389 | Metabolism | Bioenergetics | F | omega-3 fatty acid desaturase activity                                                                                                                                                      |
| 1124 | GO:0045485 | Metabolism | Bioenergetics | F | omega-6 fatty acid desaturase activity                                                                                                                                                      |
| 1125 | GO:0050203 | Metabolism | Bioenergetics | F | oxalate-CoA ligase activity                                                                                                                                                                 |
| 1126 | GO:0016491 | Metabolism | Bioenergetics | F | oxidoreductase activity                                                                                                                                                                     |
| 1127 | GO:0016667 | Metabolism | Bioenergetics | F | oxidoreductase activity, acting on a sulfur group of donors                                                                                                                                 |
| 1128 | GO:0016671 | Metabolism | Bioenergetics | F | oxidoreductase activity, acting on a sulfur group of donors, disulfide as acceptor                                                                                                          |
| 1129 | GO:0016614 | Metabolism | Bioenergetics | F | oxidoreductase activity, acting on CH-OH group of donors                                                                                                                                    |
|      |            |            |               |   | oxidoreductase activity, acting on diphenols and related substances as donors, cytochrome as acceptor                                                                                       |
| 1130 | GO:0016681 | Metabolism | Bioenergetics | F | oxidoreductase activity, acting on diphenols and related substances as donors, oxygen as acceptor                                                                                           |
| 1131 | GO:0016682 | Metabolism | Bioenergetics | F | oxidoreductase activity, acting on iron-sulfur proteins as donors                                                                                                                           |
| 1132 | GO:0016730 | Metabolism | Bioenergetics | F | oxidoreductase activity, acting on NAD(P)H                                                                                                                                                  |
| 1133 | GO:0016651 | Metabolism | Bioenergetics | F | oxidoreductase activity, acting on NAD(P)H, oxygen as acceptor                                                                                                                              |
| 1134 | GO:0050664 | Metabolism | Bioenergetics | F | oxidoreductase activity, acting on NAD(P)H, quinone or similar compound as acceptor                                                                                                         |
| 1135 | GO:0016655 | Metabolism | Bioenergetics | F | oxidoreductase activity, acting on other nitrogenous compounds as donors                                                                                                                    |
| 1136 | GO:0016661 | Metabolism | Bioenergetics | F | oxidoreductase activity, acting on paired donors, with incorporation or reduction of molecular oxygen                                                                                       |
| 1137 | GO:0016705 | Metabolism | Bioenergetics | F | oxidoreductase activity, acting on paired donors, with incorporation or reduction of molecular oxygen, NAD(P)H as one donor, and incorporation of one atom of oxygen                        |
| 1138 | GO:0016709 | Metabolism | Bioenergetics | F | oxidoreductase activity, acting on paired donors, with incorporation or reduction of molecular oxygen, reduced flavin or flavoprotein as one donor, and incorporation of one atom of oxygen |
| 1139 | GO:0016712 | Metabolism | Bioenergetics | F | oxidoreductase activity, acting on paired donors, with incorporation or reduction of molecular oxygen, reduced iron-sulfur protein as one donor, and incorporation of one atom of oxygen    |
| 1140 | GO:0016713 | Metabolism | Bioenergetics | F | oxidoreductase activity, acting on paired donors, with oxidation of a pair of donors resulting in the reduction of molecular oxygen to two molecules of water                               |
| 1141 | GO:0016717 | Metabolism | Bioenergetics | F | oxidoreductase activity, acting on single donors with incorporation of molecular oxygen                                                                                                     |
| 1142 | GO:0016701 | Metabolism | Bioenergetics | F | oxidoreductase activity, acting on single donors with incorporation of molecular oxygen, incorporation of two atoms of oxygen                                                               |
| 1143 | GO:0016702 | Metabolism | Bioenergetics | F | oxidoreductase activity, acting on the aldehyde or oxo group of donors                                                                                                                      |
| 1144 | GO:0016903 | Metabolism | Bioenergetics | F | oxidoreductase activity, acting on the aldehyde or oxo group of donors, NAD or NADP as acceptor                                                                                             |
| 1145 | GO:0016620 | Metabolism | Bioenergetics | F |                                                                                                                                                                                             |



|      |            |            |               |   |                                                                                       |
|------|------------|------------|---------------|---|---------------------------------------------------------------------------------------|
| 1146 | GO:0016627 | Metabolism | Bioenergetics | F | oxidoreductase activity, acting on the CH-CH group of donors                          |
| 1147 | GO:0016638 | Metabolism | Bioenergetics | F | oxidoreductase activity, acting on the CH-NH2 group of donors                         |
| 1148 | GO:0016616 | Metabolism | Bioenergetics | F | oxidoreductase activity, acting on the CH-OH group of donors, NAD or NADP as acceptor |
| 1149 | GO:0016899 | Metabolism | Bioenergetics | F | oxidoreductase activity, acting on the CH-OH group of donors, oxygen as acceptor      |
| 1150 | GO:0016722 | Metabolism | Bioenergetics | F | oxidoreductase activity, oxidizing metal ions                                         |
| 1151 | GO:0016724 | Metabolism | Bioenergetics | F | oxidoreductase activity, oxidizing metal ions, oxygen as acceptor                     |
| 1152 | GO:1990204 | Metabolism | Bioenergetics | C | oxidoreductase complex                                                                |
| 1153 | GO:0045252 | Metabolism | Bioenergetics | C | oxoglutarate dehydrogenase complex                                                    |
| 1154 | GO:0001405 | Metabolism | Bioenergetics | C | PAM complex, Tim23 associated import motor                                            |
| 1155 | GO:0006098 | Metabolism | Bioenergetics | P | pentose-phosphate shunt                                                               |
| 1156 | GO:0009052 | Metabolism | Bioenergetics | P | pentose-phosphate shunt, non-oxidative branch                                         |
| 1157 | GO:0009051 | Metabolism | Bioenergetics | P | pentose-phosphate shunt, oxidative branch                                             |
| 1158 | GO:0000015 | Metabolism | Bioenergetics | C | phosphopyruvate hydratase complex                                                     |
| 1159 | GO:0009853 | Metabolism | Bioenergetics | P | photorespiration                                                                      |
| 1160 | GO:0048244 | Metabolism | Bioenergetics | F | phytanoyl-CoA dioxygenase activity                                                    |
| 1161 | GO:0045272 | Metabolism | Bioenergetics | C | plasma membrane respiratory chain complex I                                           |
| 1162 | GO:0000271 | Metabolism | Bioenergetics | P | polysaccharide biosynthetic process                                                   |
| 1163 | GO:0005976 | Metabolism | Bioenergetics | P | polysaccharide metabolic process                                                      |
| 1164 | GO:0032781 | Metabolism | Bioenergetics | P | positive regulation of ATPase activity                                                |
| 1165 | GO:0045723 | Metabolism | Bioenergetics | P | positive regulation of fatty acid biosynthetic process                                |
| 1166 | GO:0010636 | Metabolism | Bioenergetics | P | positive regulation of mitochondrial fusion                                           |
| 1167 | GO:1903862 | Metabolism | Bioenergetics | P | positive regulation of oxidative phosphorylation                                      |
| 1168 | GO:1903942 | Metabolism | Bioenergetics | P | positive regulation of respiratory gaseous exchange                                   |
| 1169 | GO:0044238 | Metabolism | Bioenergetics | P | primary metabolic process                                                             |
| 1170 | GO:1902600 | Metabolism | Bioenergetics | P | proton transmembrane transport                                                        |
| 1171 | GO:0008553 | Metabolism | Bioenergetics | F | proton-exporting ATPase activity, phosphorylative mechanism                           |
| 1172 | GO:0046933 | Metabolism | Bioenergetics | F | proton-transporting ATP synthase activity, rotational mechanism                       |
| 1173 | GO:0045259 | Metabolism | Bioenergetics | C | proton-transporting ATP synthase complex                                              |
| 1174 | GO:0043461 | Metabolism | Bioenergetics | P | proton-transporting ATP synthase complex assembly                                     |
| 1175 | GO:0045261 | Metabolism | Bioenergetics | C | proton-transporting ATP synthase complex, catalytic core F(1)                         |
| 1176 | GO:0045263 | Metabolism | Bioenergetics | C | proton-transporting ATP synthase complex, coupling factor F(o)                        |
| 1177 | GO:0046961 | Metabolism | Bioenergetics | F | proton-transporting ATPase activity, rotational mechanism                             |
| 1178 | GO:0016469 | Metabolism | Bioenergetics | C | proton-transporting two-sector ATPase complex                                         |
| 1179 | GO:0033178 | Metabolism | Bioenergetics | C | proton-transporting two-sector ATPase complex, catalytic domain                       |
| 1180 | GO:0033177 | Metabolism | Bioenergetics | C | proton-transporting two-sector ATPase complex, proton-transporting domain             |
| 1181 | GO:0033176 | Metabolism | Bioenergetics | C | proton-transporting V-type ATPase complex                                             |
| 1182 | GO:0070070 | Metabolism | Bioenergetics | P | proton-transporting V-type ATPase complex assembly                                    |
| 1183 | GO:0033179 | Metabolism | Bioenergetics | C | proton-transporting V-type ATPase, V0 domain                                          |
| 1184 | GO:0033180 | Metabolism | Bioenergetics | C | proton-transporting V-type ATPase, V1 domain                                          |
| 1185 | GO:0009678 | Metabolism | Bioenergetics | F | pyrophosphate hydrolysis-driven proton transmembrane transporter activity             |
| 1186 | GO:0010318 | Metabolism | Bioenergetics | C | pyrophosphate-dependent phosphofructokinase complex, beta-subunit complex             |
| 1187 | GO:0004739 | Metabolism | Bioenergetics | F | pyruvate dehydrogenase (acetyl-transferring) activity                                 |
| 1188 | GO:0045254 | Metabolism | Bioenergetics | C | pyruvate dehydrogenase complex                                                        |
| 1189 | GO:0009078 | Metabolism | Bioenergetics | P | pyruvate family amino acid metabolic process                                          |
| 1190 | GO:0004743 | Metabolism | Bioenergetics | F | pyruvate kinase activity                                                              |
| 1191 | GO:0006090 | Metabolism | Bioenergetics | P | pyruvate metabolic process                                                            |
| 1192 | GO:0019253 | Metabolism | Bioenergetics | P | reductive pentose-phosphate cycle                                                     |
| 1193 | GO:0043462 | Metabolism | Bioenergetics | P | regulation of ATPase activity                                                         |
| 1194 | GO:0043255 | Metabolism | Bioenergetics | P | regulation of carbohydrate biosynthetic process                                       |
| 1195 | GO:0006109 | Metabolism | Bioenergetics | P | regulation of carbohydrate metabolic process                                          |
| 1196 | GO:0043610 | Metabolism | Bioenergetics | P | regulation of carbohydrate utilization                                                |
| 1197 | GO:0043457 | Metabolism | Bioenergetics | P | regulation of cellular respiration                                                    |
| 1198 | GO:0031998 | Metabolism | Bioenergetics | P | regulation of fatty acid beta-oxidation                                               |
| 1199 | GO:0010821 | Metabolism | Bioenergetics | P | regulation of mitochondrion organization                                              |
| 1200 | GO:0080093 | Metabolism | Bioenergetics | P | regulation of photorespiration                                                        |
| 1201 | GO:0010581 | Metabolism | Bioenergetics | P | regulation of starch biosynthetic process                                             |
| 1202 | GO:0070469 | Metabolism | Bioenergetics | C | respirasome                                                                           |
| 1203 | GO:0098803 | Metabolism | Bioenergetics | C | respiratory chain complex                                                             |
| 1204 | GO:0045271 | Metabolism | Bioenergetics | C | respiratory chain complex I                                                           |
| 1205 | GO:0045273 | Metabolism | Bioenergetics | C | respiratory chain complex II                                                          |
| 1206 | GO:0045275 | Metabolism | Bioenergetics | C | respiratory chain complex III                                                         |
| 1207 | GO:0022904 | Metabolism | Bioenergetics | P | respiratory electron transport chain                                                  |
| 1208 | GO:0047131 | Metabolism | Bioenergetics | F | saccharopine dehydrogenase (NAD+, L-glutamate-forming) activity                       |
| 1209 | GO:0047130 | Metabolism | Bioenergetics | F | saccharopine dehydrogenase (NADP+, L-lysine-forming) activity                         |
| 1210 | GO:0001401 | Metabolism | Bioenergetics | C | SAM complex                                                                           |
| 1211 | GO:0033587 | Metabolism | Bioenergetics | P | shikimate biosynthetic process                                                        |
| 1212 | GO:0046459 | Metabolism | Bioenergetics | P | short-chain fatty acid metabolic process                                              |
| 1213 | GO:0102420 | Metabolism | Bioenergetics | F | sn-1-glycerol-3-phosphate C16:0-DCA-CoA acyl transferase activity                     |
| 1214 | GO:0102419 | Metabolism | Bioenergetics | F | sn-2-glycerol-3-phosphate omega-OH-C22:0-CoA acyl transferase activity                |
| 1215 | GO:2001070 | Metabolism | Bioenergetics | F | starch binding                                                                        |
| 1216 | GO:0019252 | Metabolism | Bioenergetics | P | starch biosynthetic process                                                           |
| 1217 | GO:0005983 | Metabolism | Bioenergetics | P | starch catabolic process                                                              |
| 1218 | GO:0043036 | Metabolism | Bioenergetics | C | starch grain                                                                          |
| 1219 | GO:0005982 | Metabolism | Bioenergetics | P | starch metabolic process                                                              |
| 1220 | GO:0009011 | Metabolism | Bioenergetics | F | starch synthase activity                                                              |

|      |            |            |               |   |                                                               |
|------|------------|------------|---------------|---|---------------------------------------------------------------|
| 1221 | GO:0102218 | Metabolism | Bioenergetics | F | starch, H2O dikinase activity                                 |
| 1222 | GO:0008177 | Metabolism | Bioenergetics | F | succinate dehydrogenase (ubiquinone) activity                 |
| 1223 | GO:0045281 | Metabolism | Bioenergetics | C | succinate dehydrogenase complex                               |
| 1224 | GO:0004775 | Metabolism | Bioenergetics | F | succinate-CoA ligase (ADP-forming) activity                   |
| 1225 | GO:0004777 | Metabolism | Bioenergetics | F | succinate-semialdehyde dehydrogenase (NAD+) activity          |
| 1226 | GO:0009013 | Metabolism | Bioenergetics | F | succinate-semialdehyde dehydrogenase [NAD(P)+] activity       |
| 1227 | GO:0006104 | Metabolism | Bioenergetics | P | succinyl-CoA metabolic process                                |
| 1228 | GO:0005986 | Metabolism | Bioenergetics | P | sucrose biosynthetic process                                  |
| 1229 | GO:0005987 | Metabolism | Bioenergetics | P | sucrose catabolic process                                     |
| 1230 | GO:0005985 | Metabolism | Bioenergetics | P | sucrose metabolic process                                     |
| 1231 | GO:0016157 | Metabolism | Bioenergetics | F | sucrose synthase activity                                     |
| 1232 | GO:0046524 | Metabolism | Bioenergetics | F | sucrose-phosphate synthase activity                           |
| 1233 | GO:0050308 | Metabolism | Bioenergetics | C | sugar-phosphatase activity                                    |
| 1234 | GO:0042721 | Metabolism | Bioenergetics | C | TIM22 mitochondrial import inner membrane insertion complex   |
| 1235 | GO:0005744 | Metabolism | Bioenergetics | C | TIM23 mitochondrial import inner membrane translocase complex |
| 1236 | GO:0019166 | Metabolism | Bioenergetics | F | trans-2-enoyl-CoA reductase (NADPH) activity                  |
| 1237 | GO:0005992 | Metabolism | Bioenergetics | P | trehalose biosynthetic process                                |
| 1238 | GO:0005993 | Metabolism | Bioenergetics | P | trehalose catabolic process                                   |
| 1239 | GO:0005991 | Metabolism | Bioenergetics | P | trehalose metabolic process                                   |
| 1240 | GO:0004805 | Metabolism | Bioenergetics | F | trehalose-phosphatase activity                                |
| 1241 | GO:0006099 | Metabolism | Bioenergetics | P | tricarboxylic acid cycle                                      |
| 1242 | GO:0045239 | Metabolism | Bioenergetics | C | tricarboxylic acid cycle enzyme complex                       |
| 1243 | GO:0072350 | Metabolism | Bioenergetics | P | tricarboxylic acid metabolic process                          |
| 1244 | GO:0035436 | Metabolism | Bioenergetics | P | triose phosphate transmembrane transport                      |
| 1245 | GO:0102721 | Metabolism | Bioenergetics | F | ubiquinol:oxygen oxidoreductase activity                      |
| 1246 | GO:0008121 | Metabolism | Bioenergetics | F | ubiquinol-cytochrome-c reductase activity                     |
| 1247 | GO:0048039 | Metabolism | Bioenergetics | F | ubiquinone binding                                            |
| 1248 | GO:0006744 | Metabolism | Bioenergetics | P | ubiquinone biosynthetic process                               |
| 1249 | GO:1901006 | Metabolism | Bioenergetics | P | ubiquinone-6 biosynthetic process                             |
| 1250 | GO:0006636 | Metabolism | Bioenergetics | P | unsaturated fatty acid biosynthetic process                   |
| 1251 | GO:0033559 | Metabolism | Bioenergetics | P | unsaturated fatty acid metabolic process                      |
| 1252 | GO:0016471 | Metabolism | Bioenergetics | C | vacuolar proton-transporting V-type ATPase complex            |
| 1253 | GO:0000220 | Metabolism | Bioenergetics | C | vacuolar proton-transporting V-type ATPase, V0 domain         |
| 1254 | GO:0000221 | Metabolism | Bioenergetics | C | vacuolar proton-transporting V-type ATPase, V1 domain         |
| 1255 | GO:0042761 | Metabolism | Bioenergetics | P | very long-chain fatty acid biosynthetic process               |
| 1256 | GO:0000038 | Metabolism | Bioenergetics | P | very long-chain fatty acid metabolic process                  |
| 1257 | GO:0102756 | Metabolism | Bioenergetics | F | very-long-chain 3-ketoacyl-CoA synthase activity              |
| 1258 | GO:0102758 | Metabolism | Bioenergetics | F | very-long-chain enoyl-CoA reductase activity                  |
| 1259 | GO:0052852 | Metabolism | Bioenergetics | F | very-long-chain-(S)-2-hydroxy-acid oxidase activity           |
| 1260 | GO:0061158 | Metabolism | Catabolism    | P | 3'-UTR-mediated mRNA destabilization                          |
| 1261 | GO:0009838 | Metabolism | Catabolism    | P | abscission                                                    |
| 1262 | GO:0006168 | Metabolism | Catabolism    | P | adenine salvage                                               |
| 1263 | GO:0006524 | Metabolism | Catabolism    | P | alanine catabolic process                                     |
| 1264 | GO:0046164 | Metabolism | Catabolism    | P | alcohol catabolic process                                     |
| 1265 | GO:0046185 | Metabolism | Catabolism    | P | aldehyde catabolic process                                    |
| 1266 | GO:0071771 | Metabolism | Catabolism    | F | aldehyde decarbonylase activity                               |
| 1267 | GO:0043447 | Metabolism | Catabolism    | P | alkane biosynthetic process                                   |
| 1268 | GO:0043448 | Metabolism | Catabolism    | P | alkane catabolic process                                      |
| 1269 | GO:1901606 | Metabolism | Catabolism    | P | alpha-amino acid catabolic process                            |
| 1270 | GO:0046556 | Metabolism | Catabolism    | F | alpha-L-arabinofuranosidase activity                          |
| 1271 | GO:0004177 | Metabolism | Catabolism    | F | aminopeptidase activity                                       |
| 1272 | GO:0031222 | Metabolism | Catabolism    | P | arabinan catabolic process                                    |
| 1273 | GO:0006527 | Metabolism | Catabolism    | P | arginine catabolic process                                    |
| 1274 | GO:0009074 | Metabolism | Catabolism    | P | aromatic amino acid family catabolic process                  |
| 1275 | GO:0019439 | Metabolism | Catabolism    | P | aromatic compound catabolic process                           |
| 1276 | GO:0005776 | Metabolism | Catabolism    | C | autophagosome                                                 |
| 1277 | GO:0000045 | Metabolism | Catabolism    | P | autophagosome assembly                                        |
| 1278 | GO:0000421 | Metabolism | Catabolism    | C | autophagosome membrane                                        |
| 1279 | GO:0006914 | Metabolism | Catabolism    | P | autophagy                                                     |
| 1280 | GO:0009083 | Metabolism | Catabolism    | P | branched-chain amino acid catabolic process                   |
| 1281 | GO:0004089 | Metabolism | Catabolism    | F | carbonate dehydratase activity                                |
| 1282 | GO:0046395 | Metabolism | Catabolism    | P | carboxylic acid catabolic process                             |
| 1283 | GO:0009056 | Metabolism | Catabolism    | P | catabolic process                                             |
| 1284 | GO:0008219 | Metabolism | Catabolism    | P | cell death                                                    |
| 1285 | GO:0016998 | Metabolism | Catabolism    | P | cell wall macromolecule catabolic process                     |
| 1286 | GO:0009063 | Metabolism | Catabolism    | P | cellular amino acid catabolic process                         |
| 1287 | GO:0044248 | Metabolism | Catabolism    | P | cellular catabolic process                                    |
| 1288 | GO:0044242 | Metabolism | Catabolism    | P | cellular lipid catabolic process                              |
| 1289 | GO:0044265 | Metabolism | Catabolism    | P | cellular macromolecule catabolic process                      |
| 1290 | GO:0043094 | Metabolism | Catabolism    | P | cellular metabolic compound salvage                           |
| 1291 | GO:0044257 | Metabolism | Catabolism    | P | cellular protein catabolic process                            |
| 1292 | GO:0030245 | Metabolism | Catabolism    | P | cellulose catabolic process                                   |
| 1293 | GO:0006032 | Metabolism | Catabolism    | P | chitin catabolic process                                      |
| 1294 | GO:0015996 | Metabolism | Catabolism    | P | chlorophyll catabolic process                                 |
| 1295 | GO:0030574 | Metabolism | Catabolism    | P | collagen catabolic process                                    |
| 1296 | GO:0031462 | Metabolism | Catabolism    | C | Cul2-RING ubiquitin ligase complex                            |
| 1297 | GO:0031463 | Metabolism | Catabolism    | C | Cul3-RING ubiquitin ligase complex                            |
| 1298 | GO:0031464 | Metabolism | Catabolism    | C | Cul4A-RING E3 ubiquitin ligase complex                        |

|      |            |            |            |   |                                                                               |
|------|------------|------------|------------|---|-------------------------------------------------------------------------------|
| 1299 | GO:0080008 | Metabolism | Catabolism | C | Cul4-RING E3 ubiquitin ligase complex                                         |
| 1300 | GO:0031467 | Metabolism | Catabolism | C | Cul7-RING ubiquitin ligase complex                                            |
| 1301 | GO:0031461 | Metabolism | Catabolism | C | cullin-RING ubiquitin ligase complex                                          |
| 1302 | GO:0009440 | Metabolism | Catabolism | P | cyanate catabolic process                                                     |
| 1303 | GO:0004197 | Metabolism | Catabolism | F | cysteine-type endopeptidase activity                                          |
| 1304 | GO:0006216 | Metabolism | Catabolism | P | cytidine catabolic process                                                    |
| 1305 | GO:0009264 | Metabolism | Catabolism | P | deoxyribonucleotide catabolic process                                         |
| 1306 | GO:0046177 | Metabolism | Catabolism | P | D-gluconate catabolic process                                                 |
| 1307 | GO:0043649 | Metabolism | Catabolism | P | dicarboxylic acid catabolic process                                           |
| 1308 | GO:0006308 | Metabolism | Catabolism | P | DNA catabolic process                                                         |
| 1309 | GO:0000737 | Metabolism | Catabolism | P | DNA catabolic process, endonucleolytic                                        |
| 1310 | GO:0030139 | Metabolism | Catabolism | C | endocytic vesicle                                                             |
| 1311 | GO:0004175 | Metabolism | Catabolism | F | endopeptidase activity                                                        |
| 1312 | GO:1905369 | Metabolism | Catabolism | C | endopeptidase complex                                                         |
| 1313 | GO:0004521 | Metabolism | Catabolism | F | endoribonuclease activity                                                     |
| 1314 | GO:1902222 | Metabolism | Catabolism | P | erythrose 4-phosphate/phosphoenolpyruvate family amino acid catabolic process |
| 1315 | GO:0004529 | Metabolism | Catabolism | F | exodeoxyribonuclease activity                                                 |
| 1316 | GO:0016895 | Metabolism | Catabolism | F | exodeoxyribonuclease activity, producing 5'-phosphomonoesters                 |
| 1317 | GO:0004527 | Metabolism | Catabolism | F | exonuclease activity                                                          |
| 1318 | GO:0043928 | Metabolism | Catabolism | P | exonucleolytic catabolism of deadenylated mRNA                                |
| 1319 | GO:1905354 | Metabolism | Catabolism | C | exoribonuclease complex                                                       |
| 1320 | GO:0008859 | Metabolism | Catabolism | F | exoribonuclease II activity                                                   |
| 1321 | GO:0000178 | Metabolism | Catabolism | C | exosome (RNase complex)                                                       |
| 1322 | GO:0019898 | Metabolism | Catabolism | C | extrinsic component of membrane                                               |
| 1323 | GO:0010227 | Metabolism | Catabolism | P | floral organ abscission                                                       |
| 1324 | GO:0080187 | Metabolism | Catabolism | P | floral organ senescence                                                       |
| 1325 | GO:0046294 | Metabolism | Catabolism | P | formaldehyde catabolic process                                                |
| 1326 | GO:0010047 | Metabolism | Catabolism | P | fruit dehiscence                                                              |
| 1327 | GO:0019388 | Metabolism | Catabolism | P | galactose catabolic process                                                   |
| 1328 | GO:0033499 | Metabolism | Catabolism | P | galactose catabolic process via UDP-galactose                                 |
| 1329 | GO:0009450 | Metabolism | Catabolism | P | gamma-aminobutyric acid catabolic process                                     |
| 1330 | GO:0034722 | Metabolism | Catabolism | F | gamma-glutamyl-peptidase activity                                             |
| 1331 | GO:0045487 | Metabolism | Catabolism | P | gibberellin catabolic process                                                 |
| 1332 | GO:0019762 | Metabolism | Catabolism | P | glucosinolate catabolic process                                               |
| 1333 | GO:0006538 | Metabolism | Catabolism | P | glutamate catabolic process                                                   |
| 1334 | GO:0009065 | Metabolism | Catabolism | P | glutamine family amino acid catabolic process                                 |
| 1335 | GO:0006751 | Metabolism | Catabolism | P | glutathione catabolic process                                                 |
| 1336 | GO:0019563 | Metabolism | Catabolism | P | glycerol catabolic process                                                    |
| 1337 | GO:0046168 | Metabolism | Catabolism | P | glycerol-3-phosphate catabolic process                                        |
| 1338 | GO:0006546 | Metabolism | Catabolism | P | glycine catabolic process                                                     |
| 1339 | GO:1902000 | Metabolism | Catabolism | P | homogentisate catabolic process                                               |
| 1340 | GO:0032264 | Metabolism | Catabolism | P | IMP salvage                                                                   |
| 1341 | GO:0042344 | Metabolism | Catabolism | P | indole glucosinolate catabolic process                                        |
| 1342 | GO:0019310 | Metabolism | Catabolism | P | inositol catabolic process                                                    |
| 1343 | GO:0005779 | Metabolism | Catabolism | C | integral component of peroxisomal membrane                                    |
| 1344 | GO:0042853 | Metabolism | Catabolism | P | L-alanine catabolic process                                                   |
| 1345 | GO:0060866 | Metabolism | Catabolism | P | leaf abscission                                                               |
| 1346 | GO:0010150 | Metabolism | Catabolism | P | leaf senescence                                                               |
| 1347 | GO:0006552 | Metabolism | Catabolism | P | leucine catabolic process                                                     |
| 1348 | GO:0046274 | Metabolism | Catabolism | P | lignin catabolic process                                                      |
| 1349 | GO:0016042 | Metabolism | Catabolism | P | lipid catabolic process                                                       |
| 1350 | GO:0019477 | Metabolism | Catabolism | P | L-lysine catabolic process                                                    |
| 1351 | GO:0033512 | Metabolism | Catabolism | P | L-lysine catabolic process to acetyl-CoA via saccharopine                     |
| 1352 | GO:0019509 | Metabolism | Catabolism | P | L-methionine salvage from methylthioadenosine                                 |
| 1353 | GO:0006559 | Metabolism | Catabolism | P | L-phenylalanine catabolic process                                             |
| 1354 | GO:0006565 | Metabolism | Catabolism | P | L-serine catabolic process                                                    |
| 1355 | GO:0005764 | Metabolism | Catabolism | C | lysosome                                                                      |
| 1356 | GO:0009057 | Metabolism | Catabolism | P | macromolecule catabolic process                                               |
| 1357 | GO:0090410 | Metabolism | Catabolism | P | malonate catabolic process                                                    |
| 1358 | GO:0000025 | Metabolism | Catabolism | P | maltose catabolic process                                                     |
| 1359 | GO:0033619 | Metabolism | Catabolism | P | membrane protein proteolysis                                                  |
| 1360 | GO:0004222 | Metabolism | Catabolism | F | metalloendopeptidase activity                                                 |
| 1361 | GO:1905202 | Metabolism | Catabolism | C | methylcrotonoyl-CoA carboxylase complex                                       |
| 1362 | GO:0043632 | Metabolism | Catabolism | P | modification-dependent macromolecule catabolic process                        |
| 1363 | GO:0019941 | Metabolism | Catabolism | P | modification-dependent protein catabolic process                              |
| 1364 | GO:0034053 | Metabolism | Catabolism | P | modulation by symbiont of host defense-related programmed cell death          |
| 1365 | GO:0072329 | Metabolism | Catabolism | P | monocarboxylic acid catabolic process                                         |
| 1366 | GO:0006402 | Metabolism | Catabolism | P | mRNA catabolic process                                                        |
| 1367 | GO:0061157 | Metabolism | Catabolism | P | mRNA destabilization                                                          |
| 1368 | GO:1903298 | Metabolism | Catabolism | P | negative regulation of hypoxia-induced intrinsic apoptotic signaling pathway  |
| 1369 | GO:1900056 | Metabolism | Catabolism | P | negative regulation of leaf senescence                                        |
| 1370 | GO:0043069 | Metabolism | Catabolism | P | negative regulation of programmed cell death                                  |
| 1371 | GO:0016054 | Metabolism | Catabolism | P | organic acid catabolic process                                                |
| 1372 | GO:1901361 | Metabolism | Catabolism | P | organic cyclic compound catabolic process                                     |
| 1373 | GO:1901616 | Metabolism | Catabolism | P | organic hydroxy compound catabolic process                                    |
| 1374 | GO:1901575 | Metabolism | Catabolism | P | organic substance catabolic process                                           |
| 1375 | GO:1901565 | Metabolism | Catabolism | P | organonitrogen compound catabolic process                                     |

|      |            |            |            |   |                                                                                                                                    |
|------|------------|------------|------------|---|------------------------------------------------------------------------------------------------------------------------------------|
| 1376 | GO:0046434 | Metabolism | Catabolism | P | organophosphate catabolic process                                                                                                  |
| 1377 | GO:0033611 | Metabolism | Catabolism | P | oxalate catabolic process                                                                                                          |
| 1378 | GO:0019822 | Metabolism | Catabolism | C | P4 peroxisome                                                                                                                      |
| 1379 | GO:0045490 | Metabolism | Catabolism | P | pectin catabolic process                                                                                                           |
| 1380 | GO:0019323 | Metabolism | Catabolism | P | pentose catabolic process                                                                                                          |
| 1381 | GO:0008233 | Metabolism | Catabolism | F | peptidase activity                                                                                                                 |
| 1382 | GO:1905368 | Metabolism | Catabolism | C | peptidase complex                                                                                                                  |
| 1383 | GO:0043171 | Metabolism | Catabolism | P | peptide catabolic process                                                                                                          |
| 1384 | GO:0004601 | Metabolism | Catabolism | F | peroxidase activity                                                                                                                |
| 1385 | GO:0005782 | Metabolism | Catabolism | C | peroxisomal matrix                                                                                                                 |
| 1386 | GO:0005778 | Metabolism | Catabolism | C | peroxisomal membrane                                                                                                               |
| 1387 | GO:0005777 | Metabolism | Catabolism | C | peroxisome                                                                                                                         |
| 1388 | GO:0016559 | Metabolism | Catabolism | P | peroxisome fission                                                                                                                 |
| 1389 | GO:0007031 | Metabolism | Catabolism | P | peroxisome organization                                                                                                            |
| 1390 | GO:0000407 | Metabolism | Catabolism | C | phagophore assembly site                                                                                                           |
| 1391 | GO:0019336 | Metabolism | Catabolism | P | phenol-containing compound catabolic process                                                                                       |
| 1392 | GO:0010124 | Metabolism | Catabolism | P | phenylacetate catabolic process                                                                                                    |
| 1393 | GO:0009395 | Metabolism | Catabolism | P | phospholipid catabolic process                                                                                                     |
| 1394 | GO:0090693 | Metabolism | Catabolism | P | plant organ senescence                                                                                                             |
| 1395 | GO:1990137 | Metabolism | Catabolism | F | plant seed peroxidase activity                                                                                                     |
| 1396 | GO:0006598 | Metabolism | Catabolism | P | polyamine catabolic process                                                                                                        |
| 1397 | GO:0046174 | Metabolism | Catabolism | P | polyol catabolic process                                                                                                           |
| 1398 | GO:0000272 | Metabolism | Catabolism | P | polysaccharide catabolic process                                                                                                   |
| 1399 | GO:0031593 | Metabolism | Catabolism | F | polyubiquitin modification-dependent protein binding                                                                               |
| 1400 | GO:0009896 | Metabolism | Catabolism | P | positive regulation of catabolic process                                                                                           |
| 1401 | GO:0043085 | Metabolism | Catabolism | P | positive regulation of catalytic activity                                                                                          |
| 1402 | GO:0031331 | Metabolism | Catabolism | P | positive regulation of cellular catabolic process                                                                                  |
| 1403 | GO:1903364 | Metabolism | Catabolism | P | positive regulation of cellular protein catabolic process                                                                          |
| 1404 | GO:1900064 | Metabolism | Catabolism | P | positive regulation of peroxisome organization                                                                                     |
| 1405 | GO:1901800 | Metabolism | Catabolism | P | positive regulation of proteasomal protein catabolic process                                                                       |
| 1406 | GO:0032436 | Metabolism | Catabolism | P | positive regulation of proteasomal ubiquitin-dependent protein catabolic process                                                   |
| 1407 | GO:0045732 | Metabolism | Catabolism | P | positive regulation of protein catabolic process                                                                                   |
| 1408 | GO:0045862 | Metabolism | Catabolism | P | positive regulation of proteolysis                                                                                                 |
| 1409 | GO:1903052 | Metabolism | Catabolism | P | positive regulation of proteolysis involved in cellular protein catabolic process                                                  |
| 1410 | GO:1904668 | Metabolism | Catabolism | P | positive regulation of ubiquitin protein ligase activity                                                                           |
| 1411 | GO:2000060 | Metabolism | Catabolism | P | positive regulation of ubiquitin-dependent protein catabolic process                                                               |
| 1412 | GO:0051443 | Metabolism | Catabolism | P | positive regulation of ubiquitin-protein transferase activity                                                                      |
| 1413 | GO:0012501 | Metabolism | Catabolism | P | programmed cell death                                                                                                              |
| 1414 | GO:0010623 | Metabolism | Catabolism | P | programmed cell death involved in cell development                                                                                 |
| 1415 | GO:0006562 | Metabolism | Catabolism | P | proline catabolic process                                                                                                          |
| 1416 | GO:0010133 | Metabolism | Catabolism | P | proline catabolic process to glutamate                                                                                             |
| 1417 | GO:0010498 | Metabolism | Catabolism | P | proteasomal protein catabolic process                                                                                              |
| 1418 | GO:0010499 | Metabolism | Catabolism | P | proteasomal ubiquitin-independent protein catabolic process                                                                        |
| 1419 | GO:0043248 | Metabolism | Catabolism | P | proteasome assembly                                                                                                                |
| 1420 | GO:0070628 | Metabolism | Catabolism | F | proteasome binding                                                                                                                 |
| 1421 | GO:0000502 | Metabolism | Catabolism | C | proteasome complex                                                                                                                 |
| 1422 | GO:0005839 | Metabolism | Catabolism | C | proteasome core complex                                                                                                            |
| 1423 | GO:0019773 | Metabolism | Catabolism | C | proteasome core complex, alpha-subunit complex                                                                                     |
| 1424 | GO:0008540 | Metabolism | Catabolism | C | proteasome regulatory particle, base subcomplex                                                                                    |
| 1425 | GO:0008541 | Metabolism | Catabolism | C | proteasome regulatory particle, lid subcomplex                                                                                     |
| 1426 | GO:0036402 | Metabolism | Catabolism | F | proteasome-activating ATPase activity                                                                                              |
| 1427 | GO:0043161 | Metabolism | Catabolism | P | proteasome-mediated ubiquitin-dependent protein catabolic process                                                                  |
| 1428 | GO:0051865 | Metabolism | Catabolism | P | protein autoubiquitination                                                                                                         |
| 1429 | GO:0030163 | Metabolism | Catabolism | P | protein catabolic process                                                                                                          |
| 1430 | GO:0031648 | Metabolism | Catabolism | P | protein destabilization                                                                                                            |
| 1431 | GO:0016558 | Metabolism | Catabolism | P | protein import into peroxisome matrix                                                                                              |
| 1432 | GO:0070936 | Metabolism | Catabolism | P | protein K48-linked ubiquitination                                                                                                  |
| 1433 | GO:0070534 | Metabolism | Catabolism | P | protein K63-linked ubiquitination                                                                                                  |
| 1434 | GO:0006513 | Metabolism | Catabolism | P | protein monoubiquitination                                                                                                         |
| 1435 | GO:0000209 | Metabolism | Catabolism | P | protein polyubiquitination                                                                                                         |
| 1436 | GO:0043328 | Metabolism | Catabolism | P | protein transport to vacuole involved in ubiquitin-dependent protein catabolic process via the multivesicular body sorting pathway |
| 1437 | GO:0016567 | Metabolism | Catabolism | P | protein ubiquitination                                                                                                             |
| 1438 | GO:0032991 | Metabolism | Catabolism | C | protein-containing complex                                                                                                         |
| 1439 | GO:0006508 | Metabolism | Catabolism | P | proteolysis                                                                                                                        |
| 1440 | GO:0051603 | Metabolism | Catabolism | P | proteolysis involved in cellular protein catabolic process                                                                         |
| 1441 | GO:0010304 | Metabolism | Catabolism | P | PSII associated light-harvesting complex II catabolic process                                                                      |
| 1442 | GO:0006166 | Metabolism | Catabolism | P | purine ribonucleoside salvage                                                                                                      |
| 1443 | GO:0019365 | Metabolism | Catabolism | P | pyridine nucleotide salvage                                                                                                        |
| 1444 | GO:0009080 | Metabolism | Catabolism | P | pyruvate family amino acid catabolic process                                                                                       |
| 1445 | GO:0034213 | Metabolism | Catabolism | P | quinolinate catabolic process                                                                                                      |
| 1446 | GO:0052692 | Metabolism | Catabolism | F | raffinose alpha-galactosidase activity                                                                                             |
| 1447 | GO:0009894 | Metabolism | Catabolism | P | regulation of catabolic process                                                                                                    |
| 1448 | GO:1903362 | Metabolism | Catabolism | P | regulation of cellular protein catabolic process                                                                                   |
| 1449 | GO:1900055 | Metabolism | Catabolism | P | regulation of leaf senescence                                                                                                      |
| 1450 | GO:0044375 | Metabolism | Catabolism | P | regulation of peroxisome size                                                                                                      |
| 1451 | GO:0043067 | Metabolism | Catabolism | P | regulation of programmed cell death                                                                                                |

|      |            |            |            |   |                                                                          |
|------|------------|------------|------------|---|--------------------------------------------------------------------------|
| 1452 | GO:0061136 | Metabolism | Catabolism | P | regulation of proteasomal protein catabolic process                      |
| 1453 | GO:0032434 | Metabolism | Catabolism | P | regulation of proteasomal ubiquitin-dependent protein catabolic process  |
| 1454 | GO:0042176 | Metabolism | Catabolism | P | regulation of protein catabolic process                                  |
| 1455 | GO:0030162 | Metabolism | Catabolism | P | regulation of proteolysis                                                |
| 1456 | GO:1903050 | Metabolism | Catabolism | P | regulation of proteolysis involved in cellular protein catabolic process |
| 1457 | GO:2000058 | Metabolism | Catabolism | P | regulation of ubiquitin-dependent protein catabolic process              |
| 1458 | GO:1990116 | Metabolism | Catabolism | P | ribosome-associated ubiquitin-dependent protein catabolic process        |
| 1459 | GO:0006401 | Metabolism | Catabolism | P | RNA catabolic process                                                    |
| 1460 | GO:0090502 | Metabolism | Catabolism | P | RNA phosphodiester bond hydrolysis, endonucleolytic                      |
| 1461 | GO:0016075 | Metabolism | Catabolism | P | rRNA catabolic process                                                   |
| 1462 | GO:0046244 | Metabolism | Catabolism | P | salicylic acid catabolic process                                         |
| 1463 | GO:0010265 | Metabolism | Catabolism | P | SCF complex assembly                                                     |
| 1464 | GO:0031146 | Metabolism | Catabolism | P | SCF-dependent proteasomal ubiquitin-dependent protein catabolic process  |
| 1465 | GO:0010282 | Metabolism | Catabolism | C | senescence-associated vacuole                                            |
| 1466 | GO:0009071 | Metabolism | Catabolism | P | serine family amino acid catabolic process                               |
| 1467 | GO:0004185 | Metabolism | Catabolism | F | serine-type carboxypeptidase activity                                    |
| 1468 | GO:0004252 | Metabolism | Catabolism | F | serine-type endopeptidase activity                                       |
| 1469 | GO:0044282 | Metabolism | Catabolism | P | small molecule catabolic process                                         |
| 1470 | GO:0046203 | Metabolism | Catabolism | P | spermidine catabolic process                                             |
| 1471 | GO:0046208 | Metabolism | Catabolism | P | spermine catabolic process                                               |
| 1472 | GO:0046521 | Metabolism | Catabolism | P | sphingoid catabolic process                                              |
| 1473 | GO:0030149 | Metabolism | Catabolism | P | sphingolipid catabolic process                                           |
| 1474 | GO:0036459 | Metabolism | Catabolism | F | thiol-dependent ubiquitinyl hydrolase activity                           |
| 1475 | GO:0006567 | Metabolism | Catabolism | P | threonine catabolic process                                              |
| 1476 | GO:0004298 | Metabolism | Catabolism | F | threonine-type endopeptidase activity                                    |
| 1477 | GO:0006210 | Metabolism | Catabolism | P | thymine catabolic process                                                |
| 1478 | GO:0006569 | Metabolism | Catabolism | P | tryptophan catabolic process                                             |
| 1479 | GO:0019441 | Metabolism | Catabolism | P | tryptophan catabolic process to kynurenine                               |
| 1480 | GO:0006572 | Metabolism | Catabolism | P | tyrosine catabolic process                                               |
| 1481 | GO:0004839 | Metabolism | Catabolism | F | ubiquitin activating enzyme activity                                     |
| 1482 | GO:0043130 | Metabolism | Catabolism | F | ubiquitin binding                                                        |
| 1483 | GO:0061631 | Metabolism | Catabolism | F | ubiquitin conjugating enzyme activity                                    |
| 1484 | GO:0031624 | Metabolism | Catabolism | F | ubiquitin conjugating enzyme binding                                     |
| 1485 | GO:0000151 | Metabolism | Catabolism | C | ubiquitin ligase complex                                                 |
| 1486 | GO:0061630 | Metabolism | Catabolism | F | ubiquitin protein ligase activity                                        |
| 1487 | GO:0031625 | Metabolism | Catabolism | F | ubiquitin protein ligase binding                                         |
| 1488 | GO:0010992 | Metabolism | Catabolism | P | ubiquitin recycling                                                      |
| 1489 | GO:0006511 | Metabolism | Catabolism | P | ubiquitin-dependent protein catabolic process                            |
| 1490 | GO:0032182 | Metabolism | Catabolism | F | ubiquitin-like protein binding                                           |
| 1491 | GO:0061650 | Metabolism | Catabolism | F | ubiquitin-like protein conjugating enzyme activity                       |
| 1492 | GO:0044389 | Metabolism | Catabolism | F | ubiquitin-like protein ligase binding                                    |
| 1493 | GO:0019787 | Metabolism | Catabolism | F | ubiquitin-like protein transferase activity                              |
| 1494 | GO:0097027 | Metabolism | Catabolism | F | ubiquitin-protein transferase activator activity                         |
| 1495 | GO:0004842 | Metabolism | Catabolism | F | ubiquitin-protein transferase activity                                   |
| 1496 | GO:1990381 | Metabolism | Catabolism | F | ubiquitin-specific protease binding                                      |
| 1497 | GO:0006212 | Metabolism | Catabolism | P | uracil catabolic process                                                 |
| 1498 | GO:0019628 | Metabolism | Catabolism | P | urate catabolic process                                                  |
| 1499 | GO:0030891 | Metabolism | Catabolism | C | VCB complex                                                              |
| 1500 | GO:0042178 | Metabolism | Catabolism | P | xenobiotic catabolic process                                             |
| 1501 | GO:0009044 | Metabolism | Catabolism | F | xylan 1,4-beta-xylosidase activity                                       |
| 1502 | GO:0045493 | Metabolism | Catabolism | P | xylan catabolic process                                                  |
| 1503 | GO:0047504 | Metabolism | Metabolism | F | (-)-menthol dehydrogenase activity                                       |
| 1504 | GO:0047501 | Metabolism | Metabolism | F | (+)-neomenthol dehydrogenase activity                                    |
| 1505 | GO:0097008 | Metabolism | Metabolism | F | (3E)-4,8-dimethyl-1,3,7-nonatriene synthase activity                     |
| 1506 | GO:0034768 | Metabolism | Metabolism | F | (E)-beta-ocimene synthase activity                                       |
| 1507 | GO:1902609 | Metabolism | Metabolism | P | (R)-2-hydroxy-alpha-linolenic acid biosynthetic process                  |
| 1508 | GO:0051990 | Metabolism | Metabolism | F | (R)-2-hydroxyglutarate dehydrogenase activity                            |
| 1509 | GO:0102165 | Metabolism | Metabolism | F | (Z)-3-hexen-1-ol acetyltransferase activity                              |
| 1510 | GO:0044571 | Metabolism | Metabolism | P | [2Fe-2S] cluster assembly                                                |
| 1511 | GO:0046509 | Metabolism | Metabolism | F | 1,2-diacylglycerol 3-beta-galactosyltransferase activity                 |
| 1512 | GO:0009257 | Metabolism | Metabolism | P | 10-formyltetrahydrofolate biosynthetic process                           |
| 1513 | GO:0016629 | Metabolism | Metabolism | F | 12-oxophytodienoate reductase activity                                   |
| 1514 | GO:0009979 | Metabolism | Metabolism | F | 16:0 monogalactosyldiacylglycerol desaturase activity                    |
| 1515 | GO:0003841 | Metabolism | Metabolism | F | 1-acylglycerol-3-phosphate O-acyltransferase activity                    |
| 1516 | GO:0009815 | Metabolism | Metabolism | F | 1-aminocyclopropane-1-carboxylate oxidase activity                       |
| 1517 | GO:0016847 | Metabolism | Metabolism | F | 1-aminocyclopropane-1-carboxylate synthase activity                      |
| 1518 | GO:0052865 | Metabolism | Metabolism | P | 1-deoxy-D-xylulose 5-phosphate biosynthetic process                      |
| 1519 | GO:0030604 | Metabolism | Metabolism | F | 1-deoxy-D-xylulose-5-phosphate reductoisomerase activity                 |
| 1520 | GO:0008661 | Metabolism | Metabolism | F | 1-deoxy-D-xylulose-5-phosphate synthase activity                         |
| 1521 | GO:0080179 | Metabolism | Metabolism | P | 1-methylguanosine metabolic process                                      |
| 1522 | GO:0005545 | Metabolism | Metabolism | F | 1-phosphatidylinositol binding                                           |
| 1523 | GO:0051537 | Metabolism | Metabolism | F | 2 iron, 2 sulfur cluster binding                                         |
| 1524 | GO:0046537 | Metabolism | Metabolism | F | 2,3-bisphosphoglycerate-independent phosphoglycerate mutase activity     |
| 1525 | GO:0047545 | Metabolism | Metabolism | F | 2-hydroxyglutarate dehydrogenase activity                                |
| 1526 | GO:0051997 | Metabolism | Metabolism | F | 2-oxo-4-hydroxy-4-carboxy-5-ureidoimidazoline decarboxylase activity     |
| 1527 | GO:0016706 | Metabolism | Metabolism | F | 2-oxoglutarate-dependent dioxygenase activity                            |
| 1528 | GO:0051538 | Metabolism | Metabolism | F | 3 iron, 4 sulfur cluster binding                                         |
| 1529 | GO:0008686 | Metabolism | Metabolism | F | 3,4-dihydroxy-2-butanone-4-phosphate synthase activity                   |

|      |            |            |            |   |                                                                                 |
|------|------------|------------|------------|---|---------------------------------------------------------------------------------|
| 1530 | GO:0008408 | Metabolism | Metabolism | F | 3'-5' exonuclease activity                                                      |
| 1531 | GO:0000175 | Metabolism | Metabolism | F | 3'-5'-exoribonuclease activity                                                  |
| 1532 | GO:0004028 | Metabolism | Metabolism | F | 3-chloroallyl aldehyde dehydrogenase activity                                   |
| 1533 | GO:0003849 | Metabolism | Metabolism | F | 3-deoxy-7-phosphoheptulonate synthase activity                                  |
| 1534 | GO:0008690 | Metabolism | Metabolism | F | 3-deoxy-manno-octulosonate cytidyltransferase activity                          |
| 1535 | GO:0003860 | Metabolism | Metabolism | F | 3-hydroxyisobutyryl-CoA hydrolase activity                                      |
| 1536 | GO:0003861 | Metabolism | Metabolism | F | 3-isopropylmalate dehydratase activity                                          |
| 1537 | GO:0003862 | Metabolism | Metabolism | F | 3-isopropylmalate dehydrogenase activity                                        |
| 1538 | GO:0003863 | Metabolism | Metabolism | F | 3-methyl-2-oxobutanoate dehydrogenase (2-methylpropanoyl-transferring) activity |
| 1539 | GO:0080102 | Metabolism | Metabolism | F | 3-methylthiopropyl glucosinolate S-oxygenase activity                           |
| 1540 | GO:0080066 | Metabolism | Metabolism | F | 3-methylthiopropyl-desulfoglucosinolate sulfotransferase activity               |
| 1541 | GO:0051539 | Metabolism | Metabolism | F | 4 iron, 4 sulfur cluster binding                                                |
| 1542 | GO:0097007 | Metabolism | Metabolism | F | 4,8,12-trimethyltrideca-1,3,7,11-tetraene synthase activity                     |
| 1543 | GO:0004134 | Metabolism | Metabolism | F | 4-alpha-glucanotransferase activity                                             |
| 1544 | GO:0046429 | Metabolism | Metabolism | F | 4-hydroxy-3-methylbut-2-en-1-yl diphosphate synthase activity                   |
| 1545 | GO:0047443 | Metabolism | Metabolism | F | 4-hydroxy-4-methyl-2-oxoglutarate aldolase activity                             |
| 1546 | GO:0008839 | Metabolism | Metabolism | F | 4-hydroxy-tetrahydrodipicolinate reductase                                      |
| 1547 | GO:0080067 | Metabolism | Metabolism | F | 4-methylthiobutyl-desulfoglucosinolate sulfotransferase activity                |
| 1548 | GO:0080103 | Metabolism | Metabolism | F | 4-methylthiopropyl glucosinolate S-oxygenase activity                           |
| 1549 | GO:0080081 | Metabolism | Metabolism | F | 4-methylumbelliferyl-beta-D-glucopyranoside beta-glucosidase activity           |
| 1550 | GO:0008409 | Metabolism | Metabolism | F | 5'-3' exonuclease activity                                                      |
| 1551 | GO:0017108 | Metabolism | Metabolism | F | 5'-flap endonuclease activity                                                   |
| 1552 | GO:0003871 | Metabolism | Metabolism | F | 5-methyltetrahydropteroyltriglutamate-homocysteine S-methyltransferase          |
| 1553 | GO:0080068 | Metabolism | Metabolism | F | 5-methylthiopentyl-desulfoglucosinolate sulfotransferase activity               |
| 1554 | GO:0080104 | Metabolism | Metabolism | F | 5-methylthiopropyl glucosinolate S-oxygenase activity                           |
| 1555 | GO:0008253 | Metabolism | Metabolism | F | 5'-nucleotidase activity                                                        |
| 1556 | GO:0006015 | Metabolism | Metabolism | P | 5-phosphoribose 1-diphosphate biosynthetic process                              |
| 1557 | GO:0102217 | Metabolism | Metabolism | F | 6-phosphoglucan, water dikinase activity                                        |
| 1558 | GO:0017057 | Metabolism | Metabolism | F | 6-phosphogluconolactonase activity                                              |
| 1559 | GO:0080069 | Metabolism | Metabolism | F | 7-methylthioheptyl-desulfoglucosinolate sulfotransferase activity               |
| 1560 | GO:0080106 | Metabolism | Metabolism | F | 7-methylthiopropyl glucosinolate S-oxygenase activity                           |
| 1561 | GO:0080070 | Metabolism | Metabolism | F | 8-methylthiooctyl-desulfoglucosinolate sulfotransferase activity                |
| 1562 | GO:0080107 | Metabolism | Metabolism | F | 8-methylthiopropyl glucosinolate S-oxygenase activity                           |
| 1563 | GO:0044715 | Metabolism | Metabolism | F | 8-oxo-dGDP phosphatase activity                                                 |
| 1564 | GO:0102490 | Metabolism | Metabolism | F | 8-oxo-dGTP phosphohydrolase activity                                            |
| 1565 | GO:0006083 | Metabolism | Metabolism | P | acetate metabolic process                                                       |
| 1566 | GO:0008126 | Metabolism | Metabolism | F | acetyltransferase activity                                                      |
| 1567 | GO:0008375 | Metabolism | Metabolism | F | acetylglucosaminyltransferase activity                                          |
| 1568 | GO:0017096 | Metabolism | Metabolism | F | acetylserotonin O-methyltransferase activity                                    |
| 1569 | GO:0016407 | Metabolism | Metabolism | F | acetyltransferase activity                                                      |
| 1570 | GO:1902493 | Metabolism | Metabolism | C | acetyltransferase complex                                                       |
| 1571 | GO:0016881 | Metabolism | Metabolism | F | acid-amino acid ligase activity                                                 |
| 1572 | GO:0016880 | Metabolism | Metabolism | F | acid-ammonia (or amide) ligase activity                                         |
| 1573 | GO:0016878 | Metabolism | Metabolism | F | acid-thiol ligase activity                                                      |
| 1574 | GO:0010309 | Metabolism | Metabolism | F | acireductone dioxygenase [iron(II)-requiring] activity                          |
| 1575 | GO:0003994 | Metabolism | Metabolism | F | aconitate hydratase activity                                                    |
| 1576 | GO:0003779 | Metabolism | Metabolism | F | actin binding                                                                   |
| 1577 | GO:0051015 | Metabolism | Metabolism | F | actin filament binding                                                          |
| 1578 | GO:0051017 | Metabolism | Metabolism | P | actin filament bundle assembly                                                  |
| 1579 | GO:0061572 | Metabolism | Metabolism | P | actin filament bundle organization                                              |
| 1580 | GO:0051693 | Metabolism | Metabolism | P | actin filament capping                                                          |
| 1581 | GO:0030042 | Metabolism | Metabolism | P | actin filament depolymerization                                                 |
| 1582 | GO:0051639 | Metabolism | Metabolism | P | actin filament network formation                                                |
| 1583 | GO:0007015 | Metabolism | Metabolism | P | actin filament organization                                                     |
| 1584 | GO:0030041 | Metabolism | Metabolism | P | actin filament polymerization                                                   |
| 1585 | GO:0030048 | Metabolism | Metabolism | P | actin filament-based movement                                                   |
| 1586 | GO:0030029 | Metabolism | Metabolism | P | actin filament-based process                                                    |
| 1587 | GO:0003785 | Metabolism | Metabolism | F | actin monomer binding                                                           |
| 1588 | GO:0045010 | Metabolism | Metabolism | P | actin nucleation                                                                |
| 1589 | GO:0008154 | Metabolism | Metabolism | P | actin polymerization or depolymerization                                        |
| 1590 | GO:0000035 | Metabolism | Metabolism | F | acyl binding                                                                    |
| 1591 | GO:0000036 | Metabolism | Metabolism | F | acyl carrier activity                                                           |
| 1592 | GO:0045300 | Metabolism | Metabolism | F | acyl-[acyl-carrier-protein] desaturase activity                                 |
| 1593 | GO:0016297 | Metabolism | Metabolism | F | acyl-[acyl-carrier-protein] hydrolase activity                                  |
| 1594 | GO:0047372 | Metabolism | Metabolism | F | acylglycerol lipase activity                                                    |
| 1595 | GO:0003999 | Metabolism | Metabolism | F | adenine phosphoribosyltransferase activity                                      |
| 1596 | GO:0004013 | Metabolism | Metabolism | F | adenosylhomocysteinase activity                                                 |
| 1597 | GO:0004014 | Metabolism | Metabolism | F | adenosylmethionine decarboxylase activity                                       |
| 1598 | GO:0008179 | Metabolism | Metabolism | F | adenylate cyclase binding                                                       |
| 1599 | GO:0004017 | Metabolism | Metabolism | F | adenylate kinase activity                                                       |
| 1600 | GO:0047627 | Metabolism | Metabolism | F | adenylylsulfatase activity                                                      |
| 1601 | GO:0004020 | Metabolism | Metabolism | F | adenylylsulfate kinase activity                                                 |
| 1602 | GO:0009973 | Metabolism | Metabolism | F | adenylyl-sulfate reductase activity                                             |
| 1603 | GO:0006522 | Metabolism | Metabolism | P | alanine metabolic process                                                       |
| 1604 | GO:0008453 | Metabolism | Metabolism | F | alanine-glyoxylate transaminase activity                                        |
| 1605 | GO:0046165 | Metabolism | Metabolism | P | alcohol biosynthetic process                                                    |
| 1606 | GO:0004024 | Metabolism | Metabolism | F | alcohol dehydrogenase activity, zinc-dependent                                  |

|      |            |            |            |   |                                                                                          |
|------|------------|------------|------------|---|------------------------------------------------------------------------------------------|
| 1607 | GO:0006066 | Metabolism | Metabolism | P | alcohol metabolic process                                                                |
| 1608 | GO:0004031 | Metabolism | Metabolism | F | aldehyde oxidase activity                                                                |
| 1609 | GO:1990465 | Metabolism | Metabolism | F | aldehyde oxygenase (deformylating) activity                                              |
| 1610 | GO:0016832 | Metabolism | Metabolism | F | aldehyde-lyase activity                                                                  |
| 1611 | GO:0004034 | Metabolism | Metabolism | F | aldose 1-epimerase activity                                                              |
| 1612 | GO:0052595 | Metabolism | Metabolism | F | aliphatic-amine oxidase activity                                                         |
| 1613 | GO:0009820 | Metabolism | Metabolism | P | alkaloid metabolic process                                                               |
| 1614 | GO:0018685 | Metabolism | Metabolism | F | alkane 1-monooxygenase activity                                                          |
| 1615 | GO:0003905 | Metabolism | Metabolism | F | alkylbase DNA N-glycosylase activity                                                     |
| 1616 | GO:0019428 | Metabolism | Metabolism | P | allantoin biosynthetic process                                                           |
| 1617 | GO:0009978 | Metabolism | Metabolism | F | allene oxide synthase activity                                                           |
| 1618 | GO:0046423 | Metabolism | Metabolism | F | allene-oxide cyclase activity                                                            |
| 1619 | GO:0052924 | Metabolism | Metabolism | F | all-trans-nonaprenyl-diphosphate synthase (geranylgeranyl-diphosphate specific) activity |
| 1620 | GO:0033201 | Metabolism | Metabolism | F | alpha-1,4-glucan synthase activity                                                       |
| 1621 | GO:1901607 | Metabolism | Metabolism | P | alpha-amino acid biosynthetic process                                                    |
| 1622 | GO:1901605 | Metabolism | Metabolism | P | alpha-amino acid metabolic process                                                       |
| 1623 | GO:0004557 | Metabolism | Metabolism | F | alpha-galactosidase activity                                                             |
| 1624 | GO:0003826 | Metabolism | Metabolism | F | alpha-ketoacid dehydrogenase activity                                                    |
| 1625 | GO:0043604 | Metabolism | Metabolism | P | amide biosynthetic process                                                               |
| 1626 | GO:0004044 | Metabolism | Metabolism | F | amidophosphoribosyltransferase activity                                                  |
| 1627 | GO:0009309 | Metabolism | Metabolism | P | amine biosynthetic process                                                               |
| 1628 | GO:0009308 | Metabolism | Metabolism | P | amine metabolic process                                                                  |
| 1629 | GO:0016843 | Metabolism | Metabolism | F | amine-lyase activity                                                                     |
| 1630 | GO:0016597 | Metabolism | Metabolism | F | amino acid binding                                                                       |
| 1631 | GO:0052594 | Metabolism | Metabolism | F | aminoacetone:oxygen oxidoreductase(deaminating) activity                                 |
| 1632 | GO:0004046 | Metabolism | Metabolism | F | aminoacylase activity                                                                    |
| 1633 | GO:0006023 | Metabolism | Metabolism | P | aminoglycan biosynthetic process                                                         |
| 1634 | GO:0006022 | Metabolism | Metabolism | P | aminoglycan metabolic process                                                            |
| 1635 | GO:0004047 | Metabolism | Metabolism | F | aminomethyltransferase activity                                                          |
| 1636 | GO:0009940 | Metabolism | Metabolism | F | amino-terminal vacuolar sorting propeptide binding                                       |
| 1637 | GO:0019676 | Metabolism | Metabolism | P | ammonia assimilation cycle                                                               |
| 1638 | GO:0016211 | Metabolism | Metabolism | C | ammonia ligase activity                                                                  |
| 1639 | GO:0016208 | Metabolism | Metabolism | F | AMP binding                                                                              |
| 1640 | GO:0003876 | Metabolism | Metabolism | F | AMP deaminase activity                                                                   |
| 1641 | GO:0046033 | Metabolism | Metabolism | P | AMP metabolic process                                                                    |
| 1642 | GO:0044209 | Metabolism | Metabolism | P | AMP salvage                                                                              |
| 1643 | GO:0047668 | Metabolism | Metabolism | F | amygdalin beta-glucosidase activity                                                      |
| 1644 | GO:2001066 | Metabolism | Metabolism | F | amylopectin binding                                                                      |
| 1645 | GO:0010021 | Metabolism | Metabolism | P | amylopectin biosynthetic process                                                         |
| 1646 | GO:0102229 | Metabolism | Metabolism | F | amylopectin maltohydrolase activity                                                      |
| 1647 | GO:0070161 | Metabolism | Metabolism | C | anchoring junction                                                                       |
| 1648 | GO:0043168 | Metabolism | Metabolism | F | anion binding                                                                            |
| 1649 | GO:0009718 | Metabolism | Metabolism | P | anthocyanin-containing compound biosynthetic process                                     |
| 1650 | GO:0046283 | Metabolism | Metabolism | P | anthocyanin-containing compound metabolic process                                        |
| 1651 | GO:0004048 | Metabolism | Metabolism | F | anthranilate phosphoribosyltransferase activity                                          |
| 1652 | GO:0004049 | Metabolism | Metabolism | F | anthranilate synthase activity                                                           |
| 1653 | GO:0005950 | Metabolism | Metabolism | C | anthranilate synthase complex                                                            |
| 1654 | GO:0042868 | Metabolism | Metabolism | P | antisense RNA metabolic process                                                          |
| 1655 | GO:0010405 | Metabolism | Metabolism | P | arabinogalactan protein metabolic process                                                |
| 1656 | GO:0019567 | Metabolism | Metabolism | P | arabinose biosynthetic process                                                           |
| 1657 | GO:0019146 | Metabolism | Metabolism | F | arabinose-5-phosphate isomerase activity                                                 |
| 1658 | GO:0006526 | Metabolism | Metabolism | P | arginine biosynthetic process                                                            |
| 1659 | GO:0008792 | Metabolism | Metabolism | F | arginine decarboxylase activity                                                          |
| 1660 | GO:0047769 | Metabolism | Metabolism | F | arogenate dehydratase activity                                                           |
| 1661 | GO:0070330 | Metabolism | Metabolism | F | aromatase activity                                                                       |
| 1662 | GO:0009073 | Metabolism | Metabolism | P | aromatic amino acid family biosynthetic process                                          |
| 1663 | GO:0009072 | Metabolism | Metabolism | P | aromatic amino acid family metabolic process                                             |
| 1664 | GO:0019438 | Metabolism | Metabolism | P | aromatic compound biosynthetic process                                                   |
| 1665 | GO:0004058 | Metabolism | Metabolism | F | aromatic-L-amino-acid decarboxylase activity                                             |
| 1666 | GO:0034314 | Metabolism | Metabolism | P | Arp2/3 complex-mediated actin nucleation                                                 |
| 1667 | GO:0005885 | Metabolism | Metabolism | C | Arp2/3 protein complex                                                                   |
| 1668 | GO:0004067 | Metabolism | Metabolism | F | asparaginase activity                                                                    |
| 1669 | GO:0009067 | Metabolism | Metabolism | P | aspartate family amino acid biosynthetic process                                         |
| 1670 | GO:0009066 | Metabolism | Metabolism | P | aspartate family amino acid metabolic process                                            |
| 1671 | GO:0004072 | Metabolism | Metabolism | F | aspartate kinase activity                                                                |
| 1672 | GO:0042500 | Metabolism | Metabolism | F | aspartic endopeptidase activity, intramembrane cleaving                                  |
| 1673 | GO:0004190 | Metabolism | Metabolism | F | aspartic-type endopeptidase activity                                                     |
| 1674 | GO:0045330 | Metabolism | Metabolism | F | aspartyl esterase activity                                                               |
| 1675 | GO:0005524 | Metabolism | Metabolism | F | ATP binding                                                                              |
| 1676 | GO:0004176 | Metabolism | Metabolism | F | ATP-dependent peptidase activity                                                         |
| 1677 | GO:0042537 | Metabolism | Metabolism | P | benzene-containing compound metabolic process                                            |
| 1678 | GO:0018874 | Metabolism | Metabolism | P | benzoate metabolic process                                                               |
| 1679 | GO:0052641 | Metabolism | Metabolism | F | benzoic acid glucosyltransferase activity                                                |
| 1680 | GO:0102996 | Metabolism | Metabolism | F | beta,beta digalactosyldiacylglycerol galactosyltransferase activity                      |
| 1681 | GO:0019483 | Metabolism | Metabolism | P | beta-alanine biosynthetic process                                                        |
| 1682 | GO:0033396 | Metabolism | Metabolism | P | beta-alanine biosynthetic process via 3-ureidopropionate                                 |
| 1683 | GO:0019482 | Metabolism | Metabolism | P | beta-alanine metabolic process                                                           |



|      |            |            |            |   |                                                                |
|------|------------|------------|------------|---|----------------------------------------------------------------|
| 1684 | GO:0008798 | Metabolism | Metabolism | F | beta-aspartyl-peptidase activity                               |
| 1685 | GO:0004564 | Metabolism | Metabolism | F | beta-fructofuranosidase activity                               |
| 1686 | GO:0004565 | Metabolism | Metabolism | F | beta-galactosidase activity                                    |
| 1687 | GO:0080083 | Metabolism | Metabolism | F | beta-gentiobiose beta-glucosidase activity                     |
| 1688 | GO:0051274 | Metabolism | Metabolism | P | beta-glucan biosynthetic process                               |
| 1689 | GO:0051273 | Metabolism | Metabolism | P | beta-glucan metabolic process                                  |
| 1690 | GO:0008422 | Metabolism | Metabolism | F | beta-glucosidase activity                                      |
| 1691 | GO:0008802 | Metabolism | Metabolism | F | betaine-aldehyde dehydrogenase activity                        |
| 1692 | GO:0102500 | Metabolism | Metabolism | F | beta-maltose 4-alpha-glucanotransferase activity               |
| 1693 | GO:0004567 | Metabolism | Metabolism | F | beta-mannosidase activity                                      |
| 1694 | GO:0048487 | Metabolism | Metabolism | F | beta-tubulin binding                                           |
| 1695 | GO:0003837 | Metabolism | Metabolism | F | beta-ureidopropionase activity                                 |
| 1696 | GO:0005488 | Metabolism | Metabolism | F | binding                                                        |
| 1697 | GO:0008150 | Metabolism | Metabolism | P | biological_process                                             |
| 1698 | GO:0009058 | Metabolism | Metabolism | P | biosynthetic process                                           |
| 1699 | GO:0009374 | Metabolism | Metabolism | F | biotin binding                                                 |
| 1700 | GO:0009082 | Metabolism | Metabolism | P | branched-chain amino acid biosynthetic process                 |
| 1701 | GO:0009081 | Metabolism | Metabolism | P | branched-chain amino acid metabolic process                    |
| 1702 | GO:0004084 | Metabolism | Metabolism | F | branched-chain-amino-acid transaminase activity                |
| 1703 | GO:0047763 | Metabolism | Metabolism | F | caffeate O-methyltransferase activity                          |
| 1704 | GO:0010120 | Metabolism | Metabolism | P | camalexin biosynthetic process                                 |
| 1705 | GO:0052317 | Metabolism | Metabolism | P | camalexin metabolic process                                    |
| 1706 | GO:0030552 | Metabolism | Metabolism | F | cAMP binding                                                   |
| 1707 | GO:0045230 | Metabolism | Metabolism | P | capsule organization                                           |
| 1708 | GO:0045227 | Metabolism | Metabolism | P | capsule polysaccharide biosynthetic process                    |
| 1709 | GO:0015976 | Metabolism | Metabolism | P | carbon utilization                                             |
| 1710 | GO:0016830 | Metabolism | Metabolism | F | carbon-carbon lyase activity                                   |
| 1711 | GO:0016835 | Metabolism | Metabolism | F | carbon-oxygen lyase activity                                   |
| 1712 | GO:0016846 | Metabolism | Metabolism | F | carbon-sulfur lyase activity                                   |
| 1713 | GO:0046394 | Metabolism | Metabolism | P | carboxylic acid biosynthetic process                           |
| 1714 | GO:0019752 | Metabolism | Metabolism | P | carboxylic acid metabolic process                              |
| 1715 | GO:0052689 | Metabolism | Metabolism | F | carboxylic ester hydrolase activity                            |
| 1716 | GO:0016831 | Metabolism | Metabolism | F | carboxy-lyase activity                                         |
| 1717 | GO:0004180 | Metabolism | Metabolism | F | carboxypeptidase activity                                      |
| 1718 | GO:0032806 | Metabolism | Metabolism | C | carboxy-terminal domain protein kinase complex                 |
| 1719 | GO:0010291 | Metabolism | Metabolism | F | carotene beta-ring hydroxylase activity                        |
| 1720 | GO:0016119 | Metabolism | Metabolism | P | carotene metabolic process                                     |
| 1721 | GO:0003824 | Metabolism | Metabolism | F | catalytic activity                                             |
| 1722 | GO:0140096 | Metabolism | Metabolism | F | catalytic activity, acting on a protein                        |
| 1723 | GO:0140097 | Metabolism | Metabolism | F | catalytic activity, acting on DNA                              |
| 1724 | GO:1902494 | Metabolism | Metabolism | C | catalytic complex                                              |
| 1725 | GO:0043169 | Metabolism | Metabolism | F | cation binding                                                 |
| 1726 | GO:0016024 | Metabolism | Metabolism | P | CDP-diacylglycerol biosynthetic process                        |
| 1727 | GO:0003881 | Metabolism | Metabolism | F | CDP-diacylglycerol-inositol 3-phosphatidyltransferase activity |
| 1728 | GO:0044038 | Metabolism | Metabolism | P | cell wall macromolecule biosynthetic process                   |
| 1729 | GO:0044036 | Metabolism | Metabolism | P | cell wall macromolecule metabolic process                      |
| 1730 | GO:0000032 | Metabolism | Metabolism | P | cell wall mannoprotein biosynthetic process                    |
| 1731 | GO:0052325 | Metabolism | Metabolism | P | cell wall pectin biosynthetic process                          |
| 1732 | GO:0070592 | Metabolism | Metabolism | P | cell wall polysaccharide biosynthetic process                  |
| 1733 | GO:0010383 | Metabolism | Metabolism | P | cell wall polysaccharide metabolic process                     |
| 1734 | GO:0080079 | Metabolism | Metabolism | F | cellobiose glucosidase activity                                |
| 1735 | GO:0006081 | Metabolism | Metabolism | P | cellular aldehyde metabolic process                            |
| 1736 | GO:0043603 | Metabolism | Metabolism | P | cellular amide metabolic process                               |
| 1737 | GO:0044106 | Metabolism | Metabolism | P | cellular amine metabolic process                               |
| 1738 | GO:0008652 | Metabolism | Metabolism | P | cellular amino acid biosynthetic process                       |
| 1739 | GO:0006520 | Metabolism | Metabolism | P | cellular amino acid metabolic process                          |
| 1740 | GO:0006725 | Metabolism | Metabolism | P | cellular aromatic compound metabolic process                   |
| 1741 | GO:0042401 | Metabolism | Metabolism | P | cellular biogenic amine biosynthetic process                   |
| 1742 | GO:0006576 | Metabolism | Metabolism | P | cellular biogenic amine metabolic process                      |
| 1743 | GO:0044249 | Metabolism | Metabolism | P | cellular biosynthetic process                                  |
| 1744 | GO:0070589 | Metabolism | Metabolism | P | cellular component macromolecule biosynthetic process          |
| 1745 | GO:0006073 | Metabolism | Metabolism | P | cellular glucan metabolic process                              |
| 1746 | GO:0042180 | Metabolism | Metabolism | P | cellular ketone metabolic process                              |
| 1747 | GO:0044255 | Metabolism | Metabolism | P | cellular lipid metabolic process                               |
| 1748 | GO:0034645 | Metabolism | Metabolism | P | cellular macromolecule biosynthetic process                    |
| 1749 | GO:0044260 | Metabolism | Metabolism | P | cellular macromolecule metabolic process                       |
| 1750 | GO:0044237 | Metabolism | Metabolism | P | cellular metabolic process                                     |
| 1751 | GO:0006575 | Metabolism | Metabolism | P | cellular modified amino acid metabolic process                 |
| 1752 | GO:0044271 | Metabolism | Metabolism | P | cellular nitrogen compound biosynthetic process                |
| 1753 | GO:0034641 | Metabolism | Metabolism | P | cellular nitrogen compound metabolic process                   |
| 1754 | GO:0034613 | Metabolism | Metabolism | P | cellular protein localization                                  |
| 1755 | GO:0044267 | Metabolism | Metabolism | P | cellular protein metabolic process                             |
| 1756 | GO:0006464 | Metabolism | Metabolism | P | cellular protein modification process                          |
| 1757 | GO:0034622 | Metabolism | Metabolism | P | cellular protein-containing complex assembly                   |
| 1758 | GO:0008810 | Metabolism | Metabolism | F | cellulase activity                                             |
| 1759 | GO:0030244 | Metabolism | Metabolism | P | cellulose biosynthetic process                                 |
| 1760 | GO:0030243 | Metabolism | Metabolism | P | cellulose metabolic process                                    |
| 1761 | GO:0010215 | Metabolism | Metabolism | P | cellulose microfibril organization                             |

|      |            |            |            |   |                                                                          |
|------|------------|------------|------------|---|--------------------------------------------------------------------------|
| 1762 | GO:0016760 | Metabolism | Metabolism | F | cellulose synthase (UDP-forming) activity                                |
| 1763 | GO:0016759 | Metabolism | Metabolism | F | cellulose synthase activity                                              |
| 1764 | GO:0010330 | Metabolism | Metabolism | C | cellulose synthase complex                                               |
| 1765 | GO:0034080 | Metabolism | Metabolism | P | CENP-A containing nucleosome assembly                                    |
| 1766 | GO:1902387 | Metabolism | Metabolism | F | ceramide 1-phosphate binding                                             |
| 1767 | GO:1902388 | Metabolism | Metabolism | F | ceramide 1-phosphate transfer activity                                   |
| 1768 | GO:0046513 | Metabolism | Metabolism | P | ceramide biosynthetic process                                            |
| 1769 | GO:0047493 | Metabolism | Metabolism | F | ceramide cholinephosphotransferase activity                              |
| 1770 | GO:0006672 | Metabolism | Metabolism | P | ceramide metabolic process                                               |
| 1771 | GO:0030553 | Metabolism | Metabolism | F | cGMP binding                                                             |
| 1772 | GO:0009715 | Metabolism | Metabolism | P | chalcone biosynthetic process                                            |
| 1773 | GO:0008061 | Metabolism | Metabolism | F | chitin binding                                                           |
| 1774 | GO:0004568 | Metabolism | Metabolism | F | chitinase activity                                                       |
| 1775 | GO:0042425 | Metabolism | Metabolism | P | choline biosynthetic process                                             |
| 1776 | GO:0004103 | Metabolism | Metabolism | F | choline kinase activity                                                  |
| 1777 | GO:0004105 | Metabolism | Metabolism | F | choline-phosphate cytidylyltransferase activity                          |
| 1778 | GO:0009423 | Metabolism | Metabolism | P | chorismate biosynthetic process                                          |
| 1779 | GO:0003682 | Metabolism | Metabolism | F | chromatin binding                                                        |
| 1780 | GO:0050412 | Metabolism | Metabolism | F | cinnamate beta-D-glucosyltransferase activity                            |
| 1781 | GO:0009800 | Metabolism | Metabolism | P | cinnamic acid biosynthetic process                                       |
| 1782 | GO:0009801 | Metabolism | Metabolism | P | cinnamic acid ester metabolic process                                    |
| 1783 | GO:0009803 | Metabolism | Metabolism | P | cinnamic acid metabolic process                                          |
| 1784 | GO:0045551 | Metabolism | Metabolism | F | cinnamyl-alcohol dehydrogenase activity                                  |
| 1785 | GO:0033961 | Metabolism | Metabolism | F | cis-stilbene-oxide hydrolase activity                                    |
| 1786 | GO:0033468 | Metabolism | Metabolism | P | CMP-keto-3-deoxy-D-manno-octulosonic acid biosynthetic process           |
| 1787 | GO:0009236 | Metabolism | Metabolism | P | cobalamin biosynthetic process                                           |
| 1788 | GO:0048037 | Metabolism | Metabolism | F | cofactor binding                                                         |
| 1789 | GO:0047782 | Metabolism | Metabolism | F | coniferin beta-glucosidase activity                                      |
| 1790 | GO:0050268 | Metabolism | Metabolism | F | coniferyl-alcohol dehydrogenase activity                                 |
| 1791 | GO:0050269 | Metabolism | Metabolism | F | coniferyl-aldehyde dehydrogenase activity                                |
| 1792 | GO:0016531 | Metabolism | Metabolism | F | copper chaperone activity                                                |
| 1793 | GO:0005507 | Metabolism | Metabolism | F | copper ion binding                                                       |
| 1794 | GO:0009805 | Metabolism | Metabolism | P | coumarin biosynthetic process                                            |
| 1795 | GO:0009804 | Metabolism | Metabolism | P | coumarin metabolic process                                               |
| 1796 | GO:0006241 | Metabolism | Metabolism | P | CTP biosynthetic process                                                 |
| 1797 | GO:0003883 | Metabolism | Metabolism | F | CTP synthase activity                                                    |
| 1798 | GO:0097602 | Metabolism | Metabolism | F | cullin family protein binding                                            |
| 1799 | GO:0006723 | Metabolism | Metabolism | P | cuticle hydrocarbon biosynthetic process                                 |
| 1800 | GO:0010143 | Metabolism | Metabolism | P | cutin biosynthetic process                                               |
| 1801 | GO:0008824 | Metabolism | Metabolism | F | cyanate hydratase activity                                               |
| 1802 | GO:0102580 | Metabolism | Metabolism | F | cyanidin 3-O-glucoside 2-O''-xylosyltransferase activity                 |
| 1803 | GO:1901038 | Metabolism | Metabolism | P | cyanidin 3-O-glucoside metabolic process                                 |
| 1804 | GO:0047793 | Metabolism | Metabolism | F | cycloeucalenol cycloisomerase activity                                   |
| 1805 | GO:0016018 | Metabolism | Metabolism | F | cyclosporin A binding                                                    |
| 1806 | GO:0004121 | Metabolism | Metabolism | F | cystathionine beta-lyase activity                                        |
| 1807 | GO:0004123 | Metabolism | Metabolism | F | cystathionine gamma-lyase activity                                       |
| 1808 | GO:0019344 | Metabolism | Metabolism | P | cysteine biosynthetic process                                            |
| 1809 | GO:0006535 | Metabolism | Metabolism | P | cysteine biosynthetic process from serine                                |
| 1810 | GO:0019343 | Metabolism | Metabolism | P | cysteine biosynthetic process via cystathionine                          |
| 1811 | GO:0031071 | Metabolism | Metabolism | F | cysteine desulfurase activity                                            |
| 1812 | GO:0017172 | Metabolism | Metabolism | F | cysteine dioxygenase activity                                            |
| 1813 | GO:0006534 | Metabolism | Metabolism | P | cysteine metabolic process                                               |
| 1814 | GO:0004124 | Metabolism | Metabolism | F | cysteine synthase activity                                               |
| 1815 | GO:0047804 | Metabolism | Metabolism | F | cysteine-S-conjugate beta-lyase activity                                 |
| 1816 | GO:0008234 | Metabolism | Metabolism | F | cysteine-type peptidase activity                                         |
| 1817 | GO:0004126 | Metabolism | Metabolism | F | cytidine deaminase activity                                              |
| 1818 | GO:0009972 | Metabolism | Metabolism | P | cytidine deamination                                                     |
| 1819 | GO:0016554 | Metabolism | Metabolism | P | cytidine to uridine editing                                              |
| 1820 | GO:0102485 | Metabolism | Metabolism | F | dATP phosphohydrolase activity                                           |
| 1821 | GO:0102486 | Metabolism | Metabolism | F | dCTP phosphohydrolase activity                                           |
| 1822 | GO:0044210 | Metabolism | Metabolism | P | 'de novo' CTP biosynthetic process                                       |
| 1823 | GO:0042351 | Metabolism | Metabolism | P | 'de novo' GDP-L-fucose biosynthetic process                              |
| 1824 | GO:0006189 | Metabolism | Metabolism | P | 'de novo' IMP biosynthetic process                                       |
| 1825 | GO:0006207 | Metabolism | Metabolism | P | 'de novo' pyrimidine nucleobase biosynthetic process                     |
| 1826 | GO:0044205 | Metabolism | Metabolism | P | 'de novo' UMP biosynthetic process                                       |
| 1827 | GO:0019239 | Metabolism | Metabolism | F | deaminase activity                                                       |
| 1828 | GO:0009704 | Metabolism | Metabolism | P | de-etiolation                                                            |
| 1829 | GO:0045547 | Metabolism | Metabolism | F | dehydrodichyl diphosphate synthase activity                              |
| 1830 | GO:0052637 | Metabolism | Metabolism | F | delta 3-trans-hexadecenoic acid phosphatidylglycerol desaturase activity |
| 1831 | GO:0050613 | Metabolism | Metabolism | F | delta14-sterol reductase activity                                        |
| 1832 | GO:0047844 | Metabolism | Metabolism | F | deoxycytidine deaminase activity                                         |
| 1833 | GO:0019136 | Metabolism | Metabolism | F | deoxynucleoside kinase activity                                          |
| 1834 | GO:0004536 | Metabolism | Metabolism | F | deoxyribonuclease activity                                               |
| 1835 | GO:0009157 | Metabolism | Metabolism | P | deoxyribonucleoside monophosphate biosynthetic process                   |
| 1836 | GO:0009263 | Metabolism | Metabolism | P | deoxyribonucleotide biosynthetic process                                 |
| 1837 | GO:0047364 | Metabolism | Metabolism | F | desulfoglucosinolate sulfotransferase activity                           |
| 1838 | GO:0046396 | Metabolism | Metabolism | P | D-galacturonate metabolic process                                        |
| 1839 | GO:0102491 | Metabolism | Metabolism | F | dGTP phosphohydrolase activity                                           |

|      |            |            |            |   |                                                                               |
|------|------------|------------|------------|---|-------------------------------------------------------------------------------|
| 1840 | GO:0004144 | Metabolism | Metabolism | F | diacylglycerol O-acyltransferase activity                                     |
| 1841 | GO:0019877 | Metabolism | Metabolism | P | diaminopimelate biosynthetic process                                          |
| 1842 | GO:0008837 | Metabolism | Metabolism | F | diaminopimelate epimerase activity                                            |
| 1843 | GO:0043648 | Metabolism | Metabolism | P | dicarboxylic acid metabolic process                                           |
| 1844 | GO:0072548 | Metabolism | Metabolism | F | dicoumaroyl monocaffeoyl spermidine meta-hydroxylase activity                 |
| 1845 | GO:0072551 | Metabolism | Metabolism | F | diferuloyl mono-(hydroxyferuloyl) spermidine meta-hydroxylase activity        |
| 1846 | GO:0045552 | Metabolism | Metabolism | F | dihydrokaempferol 4-reductase activity                                        |
| 1847 | GO:0004148 | Metabolism | Metabolism | F | dihydrolipoyl dehydrogenase activity                                          |
| 1848 | GO:0004742 | Metabolism | Metabolism | F | dihydrolipoyllysine-residue acetyltransferase activity                        |
| 1849 | GO:0004149 | Metabolism | Metabolism | F | dihydrolipoyllysine-residue succinyltransferase activity                      |
| 1850 | GO:0004151 | Metabolism | Metabolism | F | dihydroorotase activity                                                       |
| 1851 | GO:0050992 | Metabolism | Metabolism | P | dimethylallyl diphosphate biosynthetic process                                |
| 1852 | GO:0004161 | Metabolism | Metabolism | F | dimethylallyltranstransferase activity                                        |
| 1853 | GO:0051213 | Metabolism | Metabolism | F | dioxygenase activity                                                          |
| 1854 | GO:0016805 | Metabolism | Metabolism | F | dipeptidase activity                                                          |
| 1855 | GO:0008239 | Metabolism | Metabolism | F | dipeptidyl-peptidase activity                                                 |
| 1856 | GO:0047334 | Metabolism | Metabolism | F | diphosphate-fructose-6-phosphate 1-phosphotransferase activity                |
| 1857 | GO:0004163 | Metabolism | Metabolism | F | diphosphomevalonate decarboxylase activity                                    |
| 1858 | GO:0003677 | Metabolism | Metabolism | F | DNA binding                                                                   |
| 1859 | GO:0006259 | Metabolism | Metabolism | P | DNA metabolic process                                                         |
| 1860 | GO:0019104 | Metabolism | Metabolism | F | DNA N-glycosylase activity                                                    |
| 1861 | GO:0003913 | Metabolism | Metabolism | F | DNA photolyase activity                                                       |
| 1862 | GO:0000217 | Metabolism | Metabolism | F | DNA secondary structure binding                                               |
| 1863 | GO:0008725 | Metabolism | Metabolism | F | DNA-3-methyladenine glycosylase activity                                      |
| 1864 | GO:0052822 | Metabolism | Metabolism | F | DNA-3-methylguanine glycosylase activity                                      |
| 1865 | GO:0052821 | Metabolism | Metabolism | F | DNA-7-methyladenine glycosylase activity                                      |
| 1866 | GO:0043916 | Metabolism | Metabolism | F | DNA-7-methylguanine glycosylase activity                                      |
| 1867 | GO:0019408 | Metabolism | Metabolism | P | dolichol biosynthetic process                                                 |
| 1868 | GO:0019348 | Metabolism | Metabolism | P | dolichol metabolic process                                                    |
| 1869 | GO:0006488 | Metabolism | Metabolism | P | dolichol-linked oligosaccharide biosynthetic process                          |
| 1870 | GO:0106073 | Metabolism | Metabolism | F | dolichyl pyrophosphate Glc2Man9GlcNAc2 alpha-1,2-glucosyltransferase          |
| 1871 | GO:0042281 | Metabolism | Metabolism | F | dolichyl pyrophosphate Man9GlcNAc2 alpha-1,3-glucosyltransferase activity     |
| 1872 | GO:0004579 | Metabolism | Metabolism | F | dolichyl-diphosphooligosaccharide-protein glycotransferase activity           |
| 1873 | GO:0004582 | Metabolism | Metabolism | F | dolichyl-phosphate beta-D-mannosyltransferase activity                        |
| 1874 | GO:0004583 | Metabolism | Metabolism | F | dolichyl-phosphate-glucose-glycolipid alpha-glucosyltransferase activity      |
| 1875 | GO:0003690 | Metabolism | Metabolism | F | double-stranded DNA binding                                                   |
| 1876 | GO:0003691 | Metabolism | Metabolism | F | double-stranded telomeric DNA binding                                         |
| 1877 | GO:0008830 | Metabolism | Metabolism | F | dTDP-4-dehydrorhamnose 3,5-epimerase activity                                 |
| 1878 | GO:0008831 | Metabolism | Metabolism | F | dTDP-4-dehydrorhamnose reductase activity                                     |
| 1879 | GO:0008460 | Metabolism | Metabolism | F | dTDP-glucose 4,6-dehydratase activity                                         |
| 1880 | GO:0019305 | Metabolism | Metabolism | P | dTDP-rhamnose biosynthetic process                                            |
| 1881 | GO:0102488 | Metabolism | Metabolism | F | dTTP phosphohydrolase activity                                                |
| 1882 | GO:0102487 | Metabolism | Metabolism | F | dUTP phosphohydrolase activity                                                |
| 1883 | GO:0042732 | Metabolism | Metabolism | P | D-xylose metabolic process                                                    |
| 1884 | GO:0046526 | Metabolism | Metabolism | F | D-xylulose reductase activity                                                 |
| 1885 | GO:0008843 | Metabolism | Metabolism | F | endochitinase activity                                                        |
| 1886 | GO:0006897 | Metabolism | Metabolism | P | endocytosis                                                                   |
| 1887 | GO:0016889 | Metabolism | Metabolism | F | endodeoxyribonuclease activity, producing 3'-phosphomonoesters                |
| 1888 | GO:0004866 | Metabolism | Metabolism | F | endopeptidase inhibitor activity                                              |
| 1889 | GO:0016891 | Metabolism | Metabolism | F | endoribonuclease activity, producing 5'-phosphomonoesters                     |
| 1890 | GO:0035671 | Metabolism | Metabolism | F | enone reductase activity                                                      |
| 1891 | GO:0008047 | Metabolism | Metabolism | F | enzyme activator activity                                                     |
| 1892 | GO:0019899 | Metabolism | Metabolism | F | enzyme binding                                                                |
| 1893 | GO:0004857 | Metabolism | Metabolism | F | enzyme inhibitor activity                                                     |
| 1894 | GO:0004301 | Metabolism | Metabolism | F | epoxide hydrolase activity                                                    |
| 1895 | GO:0019373 | Metabolism | Metabolism | P | epoxygenase P450 pathway                                                      |
| 1896 | GO:0006696 | Metabolism | Metabolism | P | ergosterol biosynthetic process                                               |
| 1897 | GO:1902221 | Metabolism | Metabolism | P | erythrose 4-phosphate/phosphoenolpyruvate family amino acid metabolic process |
| 1898 | GO:0080082 | Metabolism | Metabolism | F | esculin beta-glucosidase activity                                             |
| 1899 | GO:0051234 | Metabolism | Metabolism | P | establishment of localization                                                 |
| 1900 | GO:0004306 | Metabolism | Metabolism | F | ethanolamine-phosphate cytidyltransferase activity                            |
| 1901 | GO:0035885 | Metabolism | Metabolism | F | exochitinase activity                                                         |
| 1902 | GO:0006887 | Metabolism | Metabolism | P | exocytosis                                                                    |
| 1903 | GO:0010409 | Metabolism | Metabolism | P | extensin metabolic process                                                    |
| 1904 | GO:0045226 | Metabolism | Metabolism | P | extracellular polysaccharide biosynthetic process                             |
| 1905 | GO:0046379 | Metabolism | Metabolism | P | extracellular polysaccharide metabolic process                                |
| 1906 | GO:0071949 | Metabolism | Metabolism | F | FAD binding                                                                   |
| 1907 | GO:0006747 | Metabolism | Metabolism | P | FAD biosynthetic process                                                      |
| 1908 | GO:0045337 | Metabolism | Metabolism | P | farnesyl diphosphate biosynthetic process                                     |
| 1909 | GO:0004310 | Metabolism | Metabolism | F | farnesyl-diphosphate farnesyltransferase activity                             |
| 1910 | GO:0004311 | Metabolism | Metabolism | F | farnesyltranstransferase activity                                             |
| 1911 | GO:0008199 | Metabolism | Metabolism | F | ferric iron binding                                                           |
| 1912 | GO:0000293 | Metabolism | Metabolism | F | ferric-chelate reductase activity                                             |
| 1913 | GO:0004325 | Metabolism | Metabolism | F | ferrochelataase activity                                                      |
| 1914 | GO:0008198 | Metabolism | Metabolism | F | ferrous iron binding                                                          |
| 1915 | GO:0004322 | Metabolism | Metabolism | F | ferroxidase activity                                                          |
| 1916 | GO:0047890 | Metabolism | Metabolism | F | flavanone 4-reductase activity                                                |

|      |            |            |            |   |                                                               |
|------|------------|------------|------------|---|---------------------------------------------------------------|
| 1917 | GO:0050660 | Metabolism | Metabolism | F | flavin adenine dinucleotide binding                           |
| 1918 | GO:0072387 | Metabolism | Metabolism | P | flavin adenine dinucleotide metabolic process                 |
| 1919 | GO:0016971 | Metabolism | Metabolism | F | flavin-linked sulfhydryl oxidase activity                     |
| 1920 | GO:0033759 | Metabolism | Metabolism | F | flavone synthase activity                                     |
| 1921 | GO:0047893 | Metabolism | Metabolism | F | flavonol 3-O-glucosyltransferase activity                     |
| 1922 | GO:0033836 | Metabolism | Metabolism | F | flavonol 7-O-beta-glucosyltransferase activity                |
| 1923 | GO:0045431 | Metabolism | Metabolism | F | flavonol synthase activity                                    |
| 1924 | GO:0003919 | Metabolism | Metabolism | F | FMN adenylyltransferase activity                              |
| 1925 | GO:0010181 | Metabolism | Metabolism | F | FMN binding                                                   |
| 1926 | GO:0009398 | Metabolism | Metabolism | P | FMN biosynthetic process                                      |
| 1927 | GO:0046655 | Metabolism | Metabolism | P | folic acid metabolic process                                  |
| 1928 | GO:0004328 | Metabolism | Metabolism | F | formamidase activity                                          |
| 1929 | GO:0004329 | Metabolism | Metabolism | F | formate-tetrahydrofolate ligase activity                      |
| 1930 | GO:0006004 | Metabolism | Metabolism | P | fucose metabolic process                                      |
| 1931 | GO:0004333 | Metabolism | Metabolism | F | fumarate hydratase activity                                   |
| 1932 | GO:0006106 | Metabolism | Metabolism | P | fumarate metabolic process                                    |
| 1933 | GO:0047274 | Metabolism | Metabolism | F | galactinol-sucrose galactosyltransferase activity             |
| 1934 | GO:0010392 | Metabolism | Metabolism | P | galactoglucomannan metabolic process                          |
| 1935 | GO:0004335 | Metabolism | Metabolism | F | galactokinase activity                                        |
| 1936 | GO:0019375 | Metabolism | Metabolism | P | galactolipid biosynthetic process                             |
| 1937 | GO:0046480 | Metabolism | Metabolism | F | galactolipid galactosyltransferase activity                   |
| 1938 | GO:0019374 | Metabolism | Metabolism | P | galactolipid metabolic process                                |
| 1939 | GO:0051070 | Metabolism | Metabolism | P | galactomannan biosynthetic process                            |
| 1940 | GO:0005534 | Metabolism | Metabolism | F | galactose binding                                             |
| 1941 | GO:0046369 | Metabolism | Metabolism | P | galactose biosynthetic process                                |
| 1942 | GO:0006012 | Metabolism | Metabolism | P | galactose metabolic process                                   |
| 1943 | GO:0015925 | Metabolism | Metabolism | F | galactosidase activity                                        |
| 1944 | GO:0008107 | Metabolism | Metabolism | F | galactoside 2-alpha-L-fucosyltransferase activity             |
| 1945 | GO:0008378 | Metabolism | Metabolism | F | galactosyltransferase activity                                |
| 1946 | GO:0047911 | Metabolism | Metabolism | F | galacturan 1,4-alpha-galacturonidase activity                 |
| 1947 | GO:0010393 | Metabolism | Metabolism | P | galacturonan metabolic process                                |
| 1948 | GO:0033481 | Metabolism | Metabolism | P | galacturonate biosynthetic process                            |
| 1949 | GO:0019586 | Metabolism | Metabolism | P | galacturonate metabolic process                               |
| 1950 | GO:0047912 | Metabolism | Metabolism | F | galacturonokinase activity                                    |
| 1951 | GO:0003839 | Metabolism | Metabolism | F | gamma-glutamylcyclotransferase activity                       |
| 1952 | GO:0019003 | Metabolism | Metabolism | F | GDP binding                                                   |
| 1953 | GO:0008446 | Metabolism | Metabolism | F | GDP-mannose 4,6-dehydratase activity                          |
| 1954 | GO:0009298 | Metabolism | Metabolism | P | GDP-mannose biosynthetic process                              |
| 1955 | GO:0019673 | Metabolism | Metabolism | P | GDP-mannose metabolic process                                 |
| 1956 | GO:0102797 | Metabolism | Metabolism | F | geranial:oxygen oxidoreductase activity                       |
| 1957 | GO:0033384 | Metabolism | Metabolism | P | geranyl diphosphate biosynthetic process                      |
| 1958 | GO:0033386 | Metabolism | Metabolism | P | geranylgeranyl diphosphate biosynthetic process               |
| 1959 | GO:0016767 | Metabolism | Metabolism | F | geranylgeranyl-diphosphate geranylgeranyltransferase activity |
| 1960 | GO:0004337 | Metabolism | Metabolism | F | geranyltranstransferase activity                              |
| 1961 | GO:0009250 | Metabolism | Metabolism | P | glucan biosynthetic process                                   |
| 1962 | GO:0044042 | Metabolism | Metabolism | P | glucan metabolic process                                      |
| 1963 | GO:0047259 | Metabolism | Metabolism | F | glucomannan 4-beta-mannosyltransferase activity               |
| 1964 | GO:0019761 | Metabolism | Metabolism | P | glucosinolate biosynthetic process                            |
| 1965 | GO:0102799 | Metabolism | Metabolism | F | glucosinolate glucohydrolase activity                         |
| 1966 | GO:0019760 | Metabolism | Metabolism | P | glucosinolate metabolic process                               |
| 1967 | GO:0046527 | Metabolism | Metabolism | F | glucosyltransferase activity                                  |
| 1968 | GO:0015020 | Metabolism | Metabolism | F | glucuronosyltransferase activity                              |
| 1969 | GO:0030775 | Metabolism | Metabolism | F | glucuronoxylan 4-O-methyltransferase activity                 |
| 1970 | GO:0010417 | Metabolism | Metabolism | P | glucuronoxylan biosynthetic process                           |
| 1971 | GO:0004349 | Metabolism | Metabolism | F | glutamate 5-kinase activity                                   |
| 1972 | GO:0016595 | Metabolism | Metabolism | F | glutamate binding                                             |
| 1973 | GO:0006537 | Metabolism | Metabolism | P | glutamate biosynthetic process                                |
| 1974 | GO:0004351 | Metabolism | Metabolism | F | glutamate decarboxylase activity                              |
| 1975 | GO:0006540 | Metabolism | Metabolism | P | glutamate decarboxylation to succinate                        |
| 1976 | GO:0006536 | Metabolism | Metabolism | P | glutamate metabolic process                                   |
| 1977 | GO:0016041 | Metabolism | Metabolism | F | glutamate synthase (ferredoxin) activity                      |
| 1978 | GO:0004350 | Metabolism | Metabolism | F | glutamate-5-semialdehyde dehydrogenase activity               |
| 1979 | GO:0004356 | Metabolism | Metabolism | F | glutamate-ammonia ligase activity                             |
| 1980 | GO:0004357 | Metabolism | Metabolism | F | glutamate-cysteine ligase activity                            |
| 1981 | GO:0004359 | Metabolism | Metabolism | F | glutaminase activity                                          |
| 1982 | GO:0006542 | Metabolism | Metabolism | P | glutamine biosynthetic process                                |
| 1983 | GO:0009084 | Metabolism | Metabolism | P | glutamine family amino acid biosynthetic process              |
| 1984 | GO:0009064 | Metabolism | Metabolism | P | glutamine family amino acid metabolic process                 |
| 1985 | GO:0006541 | Metabolism | Metabolism | P | glutamine metabolic process                                   |
| 1986 | GO:0016603 | Metabolism | Metabolism | F | glutaminyl-peptide cyclotransferase activity                  |
| 1987 | GO:0046166 | Metabolism | Metabolism | P | glyceraldehyde-3-phosphate biosynthetic process               |
| 1988 | GO:0008465 | Metabolism | Metabolism | F | glycerate dehydrogenase activity                              |
| 1989 | GO:0008887 | Metabolism | Metabolism | F | glycerate kinase activity                                     |
| 1990 | GO:0006662 | Metabolism | Metabolism | P | glycerol ether metabolic process                              |
| 1991 | GO:0004370 | Metabolism | Metabolism | F | glycerol kinase activity                                      |
| 1992 | GO:0006071 | Metabolism | Metabolism | P | glycerol metabolic process                                    |
| 1993 | GO:0090447 | Metabolism | Metabolism | F | glycerol-3-phosphate 2-O-acyltransferase activity             |
| 1994 | GO:0046167 | Metabolism | Metabolism | P | glycerol-3-phosphate biosynthetic process                     |

|      |            |            |            |   |                                                                                         |
|------|------------|------------|------------|---|-----------------------------------------------------------------------------------------|
| 1995 | GO:0004367 | Metabolism | Metabolism | F | glycerol-3-phosphate dehydrogenase [NAD+] activity                                      |
| 1996 | GO:0009331 | Metabolism | Metabolism | C | glycerol-3-phosphate dehydrogenase complex                                              |
| 1997 | GO:0006072 | Metabolism | Metabolism | P | glycerol-3-phosphate metabolic process                                                  |
| 1998 | GO:0004366 | Metabolism | Metabolism | F | glycerol-3-phosphate O-acyltransferase activity                                         |
| 1999 | GO:0046486 | Metabolism | Metabolism | P | glycerolipid metabolic process                                                          |
| 2000 | GO:0004371 | Metabolism | Metabolism | F | glycerone kinase activity                                                               |
| 2001 | GO:0008889 | Metabolism | Metabolism | F | glycerophosphodiester phosphodiesterase activity                                        |
| 2002 | GO:0006650 | Metabolism | Metabolism | P | glycerophospholipid metabolic process                                                   |
| 2003 | GO:0016594 | Metabolism | Metabolism | F | glycine binding                                                                         |
| 2004 | GO:0006545 | Metabolism | Metabolism | P | glycine biosynthetic process                                                            |
| 2005 | GO:0019264 | Metabolism | Metabolism | P | glycine biosynthetic process from serine                                                |
| 2006 | GO:0005960 | Metabolism | Metabolism | C | glycine cleavage complex                                                                |
| 2007 | GO:0019464 | Metabolism | Metabolism | P | glycine decarboxylation via glycine cleavage system                                     |
| 2008 | GO:0004375 | Metabolism | Metabolism | F | glycine dehydrogenase (decarboxylating) activity                                        |
| 2009 | GO:0004372 | Metabolism | Metabolism | F | glycine hydroxymethyltransferase activity                                               |
| 2010 | GO:0006544 | Metabolism | Metabolism | P | glycine metabolic process                                                               |
| 2011 | GO:0047958 | Metabolism | Metabolism | F | glycine:2-oxoglutarate aminotransferase activity                                        |
| 2012 | GO:0005978 | Metabolism | Metabolism | P | glycogen biosynthetic process                                                           |
| 2013 | GO:0005977 | Metabolism | Metabolism | P | glycogen metabolic process                                                              |
| 2014 | GO:0009247 | Metabolism | Metabolism | P | glycolipid biosynthetic process                                                         |
| 2015 | GO:0034203 | Metabolism | Metabolism | P | glycolipid translocation                                                                |
| 2016 | GO:0033926 | Metabolism | Metabolism | F | glycopeptide alpha-N-acetylgalactosaminidase activity                                   |
| 2017 | GO:0009100 | Metabolism | Metabolism | P | glycoprotein metabolic process                                                          |
| 2018 | GO:0006024 | Metabolism | Metabolism | P | glycosaminoglycan biosynthetic process                                                  |
| 2019 | GO:0030203 | Metabolism | Metabolism | P | glycosaminoglycan metabolic process                                                     |
| 2020 | GO:0019758 | Metabolism | Metabolism | P | glycosinolate biosynthetic process                                                      |
| 2021 | GO:0019757 | Metabolism | Metabolism | P | glycosinolate metabolic process                                                         |
| 2022 | GO:1901659 | Metabolism | Metabolism | P | glycosyl compound biosynthetic process                                                  |
| 2023 | GO:1901657 | Metabolism | Metabolism | P | glycosyl compound metabolic process                                                     |
| 2024 | GO:0019172 | Metabolism | Metabolism | F | glyoxalase III activity                                                                 |
| 2025 | GO:0018920 | Metabolism | Metabolism | P | glyphosate metabolic process                                                            |
| 2026 | GO:0032580 | Metabolism | Metabolism | C | Golgi cisterna membrane                                                                 |
| 2027 | GO:0006506 | Metabolism | Metabolism | P | GPI anchor biosynthetic process                                                         |
| 2028 | GO:0003923 | Metabolism | Metabolism | F | GPI-anchor transamidase activity                                                        |
| 2029 | GO:0042765 | Metabolism | Metabolism | C | GPI-anchor transamidase complex                                                         |
| 2030 | GO:0010597 | Metabolism | Metabolism | P | green leaf volatile biosynthetic process                                                |
| 2031 | GO:0005525 | Metabolism | Metabolism | F | GTP binding                                                                             |
| 2032 | GO:0006183 | Metabolism | Metabolism | P | GTP biosynthetic process                                                                |
| 2033 | GO:0003935 | Metabolism | Metabolism | F | GTP cyclohydrolase II activity                                                          |
| 2034 | GO:0005096 | Metabolism | Metabolism | F | GTPase activator activity                                                               |
| 2035 | GO:0003924 | Metabolism | Metabolism | F | GTPase activity                                                                         |
| 2036 | GO:0106046 | Metabolism | Metabolism | P | guanine deglycation, glyoxal removal                                                    |
| 2037 | GO:0015969 | Metabolism | Metabolism | P | guanosine tetraphosphate metabolic process                                              |
| 2038 | GO:0004383 | Metabolism | Metabolism | F | guanylate cyclase activity                                                              |
| 2039 | GO:0005085 | Metabolism | Metabolism | F | guanyl-nucleotide exchange factor activity                                              |
| 2040 | GO:0020037 | Metabolism | Metabolism | F | heme binding                                                                            |
| 2041 | GO:0102798 | Metabolism | Metabolism | F | heptaldehyde:oxygen oxidoreductase activity                                             |
| 2042 | GO:0018130 | Metabolism | Metabolism | P | heterocycle biosynthetic process                                                        |
| 2043 | GO:0046483 | Metabolism | Metabolism | P | heterocycle metabolic process                                                           |
| 2044 | GO:1901363 | Metabolism | Metabolism | F | heterocyclic compound binding                                                           |
| 2045 | GO:0010297 | Metabolism | Metabolism | F | heteropolysaccharide binding                                                            |
| 2046 | GO:0000105 | Metabolism | Metabolism | P | histidine biosynthetic process                                                          |
| 2047 | GO:0009927 | Metabolism | Metabolism | F | histidine phosphotransfer kinase activity                                               |
| 2048 | GO:0010289 | Metabolism | Metabolism | P | homogalacturonan biosynthetic process                                                   |
| 2049 | GO:0010394 | Metabolism | Metabolism | P | homogalacturonan metabolic process                                                      |
| 2050 | GO:0004411 | Metabolism | Metabolism | F | homogentisate 1,2-dioxygenase activity                                                  |
| 2051 | GO:0009090 | Metabolism | Metabolism | P | homoserine biosynthetic process                                                         |
| 2052 | GO:0004412 | Metabolism | Metabolism | F | homoserine dehydrogenase activity                                                       |
| 2053 | GO:0004413 | Metabolism | Metabolism | F | homoserine kinase activity                                                              |
| 2054 | GO:0120251 | Metabolism | Metabolism | P | hydrocarbon biosynthetic process                                                        |
| 2055 | GO:0120252 | Metabolism | Metabolism | P | hydrocarbon metabolic process                                                           |
| 2056 | GO:0070814 | Metabolism | Metabolism | P | hydrogen sulfide biosynthetic process                                                   |
| 2057 | GO:0070813 | Metabolism | Metabolism | P | hydrogen sulfide metabolic process                                                      |
| 2058 | GO:0016787 | Metabolism | Metabolism | F | hydrolase activity                                                                      |
| 2059 | GO:0016817 | Metabolism | Metabolism | F | hydrolase activity, acting on acid anhydrides                                           |
| 2060 | GO:0016818 | Metabolism | Metabolism | F | hydrolase activity, acting on acid anhydrides, in phosphorus-containing anhydrides      |
| 2061 | GO:0016811 | Metabolism | Metabolism | F | hydrolase activity, acting on carbon-nitrogen (but not peptide) bonds, in linear amides |
| 2062 | GO:0016788 | Metabolism | Metabolism | F | hydrolase activity, acting on ester bonds                                               |
| 2063 | GO:0016798 | Metabolism | Metabolism | F | hydrolase activity, acting on glycosyl bonds                                            |
| 2064 | GO:0016799 | Metabolism | Metabolism | F | hydrolase activity, hydrolyzing N-glycosyl compounds                                    |
| 2065 | GO:0004553 | Metabolism | Metabolism | F | hydrolase activity, hydrolyzing O-glycosyl compounds                                    |
| 2066 | GO:0016836 | Metabolism | Metabolism | F | hydro-lyase activity                                                                    |
| 2067 | GO:0033971 | Metabolism | Metabolism | F | hydroxyisourate hydrolase activity                                                      |
| 2068 | GO:1990714 | Metabolism | Metabolism | F | hydroxyproline O-galactosyltransferase activity                                         |
| 2069 | GO:0016618 | Metabolism | Metabolism | F | hydroxypyruvate reductase activity                                                      |
| 2070 | GO:0102953 | Metabolism | Metabolism | F | hypoglycin A gamma-glutamyl transpeptidase activity                                     |

|      |            |            |            |   |                                                                                                                               |
|------|------------|------------|------------|---|-------------------------------------------------------------------------------------------------------------------------------|
| 2071 | GO:0042802 | Metabolism | Metabolism | F | identical protein binding                                                                                                     |
| 2072 | GO:0006188 | Metabolism | Metabolism | P | IMP biosynthetic process                                                                                                      |
| 2073 | GO:0003937 | Metabolism | Metabolism | F | IMP cyclohydrolase activity                                                                                                   |
| 2074 | GO:0080071 | Metabolism | Metabolism | F | indol-3-yl-methyl-desulfoglucosinolate sulfotransferase activity                                                              |
| 2075 | GO:0009759 | Metabolism | Metabolism | P | indole glucosinolate biosynthetic process                                                                                     |
| 2076 | GO:0042343 | Metabolism | Metabolism | P | indole glucosinolate metabolic process                                                                                        |
| 2077 | GO:0009700 | Metabolism | Metabolism | P | indole phytoalexin biosynthetic process                                                                                       |
| 2078 | GO:0103007 | Metabolism | Metabolism | F | indole-3-acetate carboxyl methyltransferase activity                                                                          |
| 2079 | GO:0052638 | Metabolism | Metabolism | F | indole-3-butyrate beta-glucosyltransferase activity                                                                           |
| 2080 | GO:0004425 | Metabolism | Metabolism | F | indole-3-glycerol-phosphate synthase activity                                                                                 |
| 2081 | GO:0103075 | Metabolism | Metabolism | F | indole-3-pyruvate monooxygenase activity                                                                                      |
| 2082 | GO:0042435 | Metabolism | Metabolism | P | indole-containing compound biosynthetic process                                                                               |
| 2083 | GO:0042430 | Metabolism | Metabolism | P | indole-containing compound metabolic process                                                                                  |
| 2084 | GO:0004427 | Metabolism | Metabolism | F | inorganic diphosphatase activity                                                                                              |
| 2085 | GO:0006021 | Metabolism | Metabolism | P | inositol biosynthetic process                                                                                                 |
| 2086 | GO:0000822 | Metabolism | Metabolism | F | inositol hexakisphosphate binding                                                                                             |
| 2087 | GO:0006020 | Metabolism | Metabolism | P | inositol metabolic process                                                                                                    |
| 2088 | GO:0008934 | Metabolism | Metabolism | F | inositol monophosphate 1-phosphatase activity                                                                                 |
| 2089 | GO:0052832 | Metabolism | Metabolism | F | inositol monophosphate 3-phosphatase activity                                                                                 |
| 2090 | GO:0052833 | Metabolism | Metabolism | F | inositol monophosphate 4-phosphatase activity                                                                                 |
| 2091 | GO:0043647 | Metabolism | Metabolism | P | inositol phosphate metabolic process                                                                                          |
| 2092 | GO:0045140 | Metabolism | Metabolism | F | inositol phosphoceramide synthase activity                                                                                    |
| 2093 | GO:0004512 | Metabolism | Metabolism | F | inositol-3-phosphate synthase activity                                                                                        |
| 2094 | GO:0006880 | Metabolism | Metabolism | P | intracellular sequestering of iron ion                                                                                        |
| 2095 | GO:0016860 | Metabolism | Metabolism | F | intramolecular oxidoreductase activity                                                                                        |
| 2096 | GO:0016861 | Metabolism | Metabolism | F | intramolecular oxidoreductase activity, interconverting aldoses and ketoses                                                   |
| 2097 | GO:0016866 | Metabolism | Metabolism | F | intramolecular transferase activity                                                                                           |
| 2098 | GO:0005242 | Metabolism | Metabolism | F | inward rectifier potassium channel activity                                                                                   |
| 2099 | GO:0043167 | Metabolism | Metabolism | F | ion binding                                                                                                                   |
| 2100 | GO:0005506 | Metabolism | Metabolism | F | iron ion binding                                                                                                              |
| 2101 | GO:0016226 | Metabolism | Metabolism | P | iron-sulfur cluster assembly                                                                                                  |
| 2102 | GO:0051536 | Metabolism | Metabolism | F | iron-sulfur cluster binding                                                                                                   |
| 2103 | GO:0008909 | Metabolism | Metabolism | F | isochorismate synthase activity                                                                                               |
| 2104 | GO:0009097 | Metabolism | Metabolism | P | isoleucine biosynthetic process                                                                                               |
| 2105 | GO:0016853 | Metabolism | Metabolism | F | isomerase activity                                                                                                            |
| 2106 | GO:0009240 | Metabolism | Metabolism | P | isopentenyl diphosphate biosynthetic process                                                                                  |
| 2107 | GO:0019288 | Metabolism | Metabolism | P | isopentenyl diphosphate biosynthetic process, methylerythritol 4-phosphate pathway                                            |
| 2108 | GO:0051484 | Metabolism | Metabolism | P | isopentenyl diphosphate biosynthetic process, methylerythritol 4-phosphate pathway involved in terpenoid biosynthetic process |
| 2109 | GO:0019287 | Metabolism | Metabolism | P | isopentenyl diphosphate biosynthetic process, mevalonate pathway                                                              |
| 2110 | GO:0004452 | Metabolism | Metabolism | F | isopentenyl-diphosphate delta-isomerase activity                                                                              |
| 2111 | GO:0008299 | Metabolism | Metabolism | P | isoprenoid biosynthetic process                                                                                               |
| 2112 | GO:0006720 | Metabolism | Metabolism | P | isoprenoid metabolic process                                                                                                  |
| 2113 | GO:0052694 | Metabolism | Metabolism | F | jasmonoyl-isoleucine-12-hydroxylase activity                                                                                  |
| 2114 | GO:0046951 | Metabolism | Metabolism | P | ketone body biosynthetic process                                                                                              |
| 2115 | GO:0045703 | Metabolism | Metabolism | F | ketoreductase activity                                                                                                        |
| 2116 | GO:0019894 | Metabolism | Metabolism | F | kinesin binding                                                                                                               |
| 2117 | GO:0016212 | Metabolism | Metabolism | F | kynurenine-oxoglutarate transaminase activity                                                                                 |
| 2118 | GO:0008911 | Metabolism | Metabolism | F | lactaldehyde dehydrogenase activity                                                                                           |
| 2119 | GO:0019516 | Metabolism | Metabolism | P | lactate oxidation                                                                                                             |
| 2120 | GO:0042851 | Metabolism | Metabolism | P | L-alanine metabolic process                                                                                                   |
| 2121 | GO:0004021 | Metabolism | Metabolism | F | L-alanine:2-oxoglutarate aminotransferase activity                                                                            |
| 2122 | GO:0008732 | Metabolism | Metabolism | F | L-allo-threonine aldolase activity                                                                                            |
| 2123 | GO:0046373 | Metabolism | Metabolism | P | L-arabinose metabolic process                                                                                                 |
| 2124 | GO:0004069 | Metabolism | Metabolism | F | L-aspartate:2-oxoglutarate aminotransferase activity                                                                          |
| 2125 | GO:0009098 | Metabolism | Metabolism | P | leucine biosynthetic process                                                                                                  |
| 2126 | GO:0006551 | Metabolism | Metabolism | P | leucine metabolic process                                                                                                     |
| 2127 | GO:0019370 | Metabolism | Metabolism | P | leukotriene biosynthetic process                                                                                              |
| 2128 | GO:0103068 | Metabolism | Metabolism | F | leukotriene C4 gamma-glutamyl transferase activity                                                                            |
| 2129 | GO:0097054 | Metabolism | Metabolism | P | L-glutamate biosynthetic process                                                                                              |
| 2130 | GO:0016874 | Metabolism | Metabolism | F | ligase activity                                                                                                               |
| 2131 | GO:0016877 | Metabolism | Metabolism | F | ligase activity, forming carbon-sulfur bonds                                                                                  |
| 2132 | GO:0009807 | Metabolism | Metabolism | P | lignan biosynthetic process                                                                                                   |
| 2133 | GO:0009809 | Metabolism | Metabolism | P | lignin biosynthetic process                                                                                                   |
| 2134 | GO:0009808 | Metabolism | Metabolism | P | lignin metabolic process                                                                                                      |
| 2135 | GO:0016165 | Metabolism | Metabolism | F | linoleate 13S-lipoxygenase activity                                                                                           |
| 2136 | GO:1990136 | Metabolism | Metabolism | F | linoleate 9S-lipoxygenase activity                                                                                            |
| 2137 | GO:0016298 | Metabolism | Metabolism | F | lipase activity                                                                                                               |
| 2138 | GO:0008289 | Metabolism | Metabolism | F | lipid binding                                                                                                                 |
| 2139 | GO:0008610 | Metabolism | Metabolism | P | lipid biosynthetic process                                                                                                    |
| 2140 | GO:0140042 | Metabolism | Metabolism | P | lipid droplet formation                                                                                                       |
| 2141 | GO:0034389 | Metabolism | Metabolism | P | lipid droplet organization                                                                                                    |
| 2142 | GO:0030259 | Metabolism | Metabolism | P | lipid glycosylation                                                                                                           |
| 2143 | GO:0010876 | Metabolism | Metabolism | P | lipid localization                                                                                                            |
| 2144 | GO:0006629 | Metabolism | Metabolism | P | lipid metabolic process                                                                                                       |
| 2145 | GO:0030258 | Metabolism | Metabolism | P | lipid modification                                                                                                            |
| 2146 | GO:0019915 | Metabolism | Metabolism | P | lipid storage                                                                                                                 |

|      |            |            |            |   |                                                                           |
|------|------------|------------|------------|---|---------------------------------------------------------------------------|
| 2147 | GO:0009107 | Metabolism | Metabolism | P | lipoate biosynthetic process                                              |
| 2148 | GO:0016992 | Metabolism | Metabolism | F | lipoate synthase activity                                                 |
| 2149 | GO:0031405 | Metabolism | Metabolism | F | lipoic acid binding                                                       |
| 2150 | GO:0052656 | Metabolism | Metabolism | F | L-isoleucine transaminase activity                                        |
| 2151 | GO:0004459 | Metabolism | Metabolism | F | L-lactate dehydrogenase activity                                          |
| 2152 | GO:0052654 | Metabolism | Metabolism | F | L-leucine transaminase activity                                           |
| 2153 | GO:0062045 | Metabolism | Metabolism | F | L-lysine alpha-aminotransferase                                           |
| 2154 | GO:0019279 | Metabolism | Metabolism | P | L-methionine biosynthetic process from L-homoserine via cystathionine     |
| 2155 | GO:0036456 | Metabolism | Metabolism | F | L-methionine-(S)-S-oxide reductase activity                               |
| 2156 | GO:0033744 | Metabolism | Metabolism | F | L-methionine:thioredoxin-disulfide S-oxidoreductase activity              |
| 2157 | GO:0051179 | Metabolism | Metabolism | P | localization                                                              |
| 2158 | GO:0046577 | Metabolism | Metabolism | F | long-chain-alcohol oxidase activity                                       |
| 2159 | GO:0009094 | Metabolism | Metabolism | P | L-phenylalanine biosynthetic process                                      |
| 2160 | GO:0006558 | Metabolism | Metabolism | P | L-phenylalanine metabolic process                                         |
| 2161 | GO:0062034 | Metabolism | Metabolism | P | L-pipecolic acid biosynthetic process                                     |
| 2162 | GO:0055129 | Metabolism | Metabolism | P | L-proline biosynthetic process                                            |
| 2163 | GO:0006564 | Metabolism | Metabolism | P | L-serine biosynthetic process                                             |
| 2164 | GO:0006563 | Metabolism | Metabolism | P | L-serine metabolic process                                                |
| 2165 | GO:0050362 | Metabolism | Metabolism | F | L-tryptophan:2-oxoglutarate aminotransferase activity                     |
| 2166 | GO:0004838 | Metabolism | Metabolism | F | L-tyrosine:2-oxoglutarate aminotransferase activity                       |
| 2167 | GO:0030744 | Metabolism | Metabolism | F | luteolin O-methyltransferase activity                                     |
| 2168 | GO:0052655 | Metabolism | Metabolism | F | L-valine transaminase activity                                            |
| 2169 | GO:0016829 | Metabolism | Metabolism | F | lyase activity                                                            |
| 2170 | GO:0019878 | Metabolism | Metabolism | P | lysine biosynthetic process via aminoadipic acid                          |
| 2171 | GO:0009089 | Metabolism | Metabolism | P | lysine biosynthetic process via diaminopimelate                           |
| 2172 | GO:0016278 | Metabolism | Metabolism | F | lysine N-methyltransferase activity                                       |
| 2173 | GO:0042171 | Metabolism | Metabolism | F | lysophosphatidic acid acyltransferase activity                            |
| 2174 | GO:0080171 | Metabolism | Metabolism | P | lytic vacuole organization                                                |
| 2175 | GO:0009059 | Metabolism | Metabolism | P | macromolecule biosynthetic process                                        |
| 2176 | GO:0043170 | Metabolism | Metabolism | P | macromolecule metabolic process                                           |
| 2177 | GO:0016851 | Metabolism | Metabolism | F | magnesium chelatase activity                                              |
| 2178 | GO:0000287 | Metabolism | Metabolism | F | magnesium ion binding                                                     |
| 2179 | GO:0048529 | Metabolism | Metabolism | F | magnesium-protoporphyrin IX monomethyl ester (oxidative) cyclase activity |
| 2180 | GO:0016034 | Metabolism | Metabolism | F | maleylacetoacetate isomerase activity                                     |
| 2181 | GO:0102216 | Metabolism | Metabolism | F | maltodextrin water dikinase                                               |
| 2182 | GO:1901982 | Metabolism | Metabolism | F | maltose binding                                                           |
| 2183 | GO:0000024 | Metabolism | Metabolism | P | maltose biosynthetic process                                              |
| 2184 | GO:0030145 | Metabolism | Metabolism | F | manganese ion binding                                                     |
| 2185 | GO:0010412 | Metabolism | Metabolism | P | mannan metabolic process                                                  |
| 2186 | GO:0051753 | Metabolism | Metabolism | F | mannan synthase activity                                                  |
| 2187 | GO:0004475 | Metabolism | Metabolism | F | mannose-1-phosphate guanylyltransferase activity                          |
| 2188 | GO:0004476 | Metabolism | Metabolism | F | mannose-6-phosphate isomerase activity                                    |
| 2189 | GO:0097502 | Metabolism | Metabolism | P | mannosylation                                                             |
| 2190 | GO:0000030 | Metabolism | Metabolism | F | mannosyltransferase activity                                              |
| 2191 | GO:0008381 | Metabolism | Metabolism | F | mechanosensitive ion channel activity                                     |
| 2192 | GO:0052854 | Metabolism | Metabolism | F | medium-chain-(S)-2-hydroxy-acid oxidase activity                          |
| 2193 | GO:1904408 | Metabolism | Metabolism | F | melatonin binding                                                         |
| 2194 | GO:0030187 | Metabolism | Metabolism | P | melatonin biosynthetic process                                            |
| 2195 | GO:0008502 | Metabolism | Metabolism | F | melatonin receptor activity                                               |
| 2196 | GO:0046467 | Metabolism | Metabolism | P | membrane lipid biosynthetic process                                       |
| 2197 | GO:0006643 | Metabolism | Metabolism | P | membrane lipid metabolic process                                          |
| 2198 | GO:0008152 | Metabolism | Metabolism | P | metabolic process                                                         |
| 2199 | GO:0046872 | Metabolism | Metabolism | F | metal ion binding                                                         |
| 2200 | GO:0070006 | Metabolism | Metabolism | F | metalloaminopeptidase activity                                            |
| 2201 | GO:0008235 | Metabolism | Metabolism | F | metalloexopeptidase activity                                              |
| 2202 | GO:0008237 | Metabolism | Metabolism | F | metallopeptidase activity                                                 |
| 2203 | GO:0004477 | Metabolism | Metabolism | F | methenyltetrahydrofolate cyclohydrolase activity                          |
| 2204 | GO:0103045 | Metabolism | Metabolism | F | methione N-acyltransferase activity                                       |
| 2205 | GO:0004478 | Metabolism | Metabolism | F | methionine adenosyltransferase activity                                   |
| 2206 | GO:0009086 | Metabolism | Metabolism | P | methionine biosynthetic process                                           |
| 2207 | GO:0006555 | Metabolism | Metabolism | P | methionine metabolic process                                              |
| 2208 | GO:0030732 | Metabolism | Metabolism | F | methionine S-methyltransferase activity                                   |
| 2209 | GO:0008705 | Metabolism | Metabolism | F | methionine synthase activity                                              |
| 2210 | GO:0010326 | Metabolism | Metabolism | F | methionine-oxo-acid transaminase activity                                 |
| 2211 | GO:0102078 | Metabolism | Metabolism | F | methyl jasmonate methylesterase activity                                  |
| 2212 | GO:0008327 | Metabolism | Metabolism | F | methyl-CpG binding                                                        |
| 2213 | GO:0008168 | Metabolism | Metabolism | F | methyltransferase activity                                                |
| 2214 | GO:0000146 | Metabolism | Metabolism | F | microfilament motor activity                                              |
| 2215 | GO:0008017 | Metabolism | Metabolism | F | microtubule binding                                                       |
| 2216 | GO:0007019 | Metabolism | Metabolism | P | microtubule depolymerization                                              |
| 2217 | GO:0051011 | Metabolism | Metabolism | F | microtubule minus-end binding                                             |
| 2218 | GO:0051010 | Metabolism | Metabolism | F | microtubule plus-end binding                                              |
| 2219 | GO:0031109 | Metabolism | Metabolism | P | microtubule polymerization or depolymerization                            |
| 2220 | GO:0019048 | Metabolism | Metabolism | P | modulation by virus of host morphology or physiology                      |
| 2221 | GO:0060090 | Metabolism | Metabolism | F | molecular adaptor activity                                                |
| 2222 | GO:0003674 | Metabolism | Metabolism | F | molecular_function                                                        |
| 2223 | GO:0030151 | Metabolism | Metabolism | F | molybdenum ion binding                                                    |
| 2224 | GO:0030366 | Metabolism | Metabolism | F | molybdopterin synthase activity                                           |



|      |            |            |            |   |                                                                                 |
|------|------------|------------|------------|---|---------------------------------------------------------------------------------|
| 2225 | GO:0006777 | Metabolism | Metabolism | P | Mo-molybdopterin cofactor biosynthetic process                                  |
| 2226 | GO:0072330 | Metabolism | Metabolism | P | monocarboxylic acid biosynthetic process                                        |
| 2227 | GO:0032787 | Metabolism | Metabolism | P | monocarboxylic acid metabolic process                                           |
| 2228 | GO:0072549 | Metabolism | Metabolism | F | monocoumaroyl dicaffeoyl spermidine meta-hydroxylase activity                   |
| 2229 | GO:0072552 | Metabolism | Metabolism | F | monoferuloyl di-(hydroxyferuloyl) spermidine meta-hydroxylase activity          |
| 2230 | GO:0004497 | Metabolism | Metabolism | F | monooxygenase activity                                                          |
| 2231 | GO:0005996 | Metabolism | Metabolism | P | monosaccharide metabolic process                                                |
| 2232 | GO:0043693 | Metabolism | Metabolism | P | monoterpene biosynthetic process                                                |
| 2233 | GO:0016099 | Metabolism | Metabolism | P | monoterpenoid biosynthetic process                                              |
| 2234 | GO:0005451 | Metabolism | Metabolism | F | monovalent cation:proton antiporter activity                                    |
| 2235 | GO:0003774 | Metabolism | Metabolism | F | motor activity                                                                  |
| 2236 | GO:0010192 | Metabolism | Metabolism | P | mucilage biosynthetic process                                                   |
| 2237 | GO:0048354 | Metabolism | Metabolism | P | mucilage biosynthetic process involved in seed coat development                 |
| 2238 | GO:0010191 | Metabolism | Metabolism | P | mucilage metabolic process                                                      |
| 2239 | GO:0048359 | Metabolism | Metabolism | P | mucilage metabolic process involved in seed coat development                    |
| 2240 | GO:0048358 | Metabolism | Metabolism | P | mucilage pectin biosynthetic process                                            |
| 2241 | GO:0032405 | Metabolism | Metabolism | F | MutLalpha complex binding                                                       |
| 2242 | GO:0010264 | Metabolism | Metabolism | P | myo-inositol hexakisphosphate biosynthetic process                              |
| 2243 | GO:0017022 | Metabolism | Metabolism | F | myosin binding                                                                  |
| 2244 | GO:0045159 | Metabolism | Metabolism | F | myosin II binding                                                               |
| 2245 | GO:0080115 | Metabolism | Metabolism | F | myosin XI tail binding                                                          |
| 2246 | GO:0050551 | Metabolism | Metabolism | F | myrcene synthase activity                                                       |
| 2247 | GO:0033799 | Metabolism | Metabolism | F | myricetin 3'-O-methyltransferase activity                                       |
| 2248 | GO:0061711 | Metabolism | Metabolism | F | N(6)-L-threonylcarbamoyladenine synthase activity                               |
| 2249 | GO:0004499 | Metabolism | Metabolism | F | N,N-dimethylaniline monooxygenase activity                                      |
|      |            |            |            |   | N1-acetylspermine:oxygen oxidoreductase (N1-acetylspermidine-forming) activity  |
| 2250 | GO:0052895 | Metabolism | Metabolism | F |                                                                                 |
| 2251 | GO:0010013 | Metabolism | Metabolism | F | N-1-naphthylphthalamic acid binding                                             |
| 2252 | GO:0003992 | Metabolism | Metabolism | F | N2-acetyl-L-ornithine:2-oxoglutarate 5-aminotransferase activity                |
|      |            |            |            |   |                                                                                 |
| 2253 | GO:0004577 | Metabolism | Metabolism | F | N-acetylglucosaminyl diphosphodolichol N-acetylglucosaminyltransferase activity |
| 2254 | GO:0008080 | Metabolism | Metabolism | F | N-acetyltransferase activity                                                    |
| 2255 | GO:0045486 | Metabolism | Metabolism | F | naringenin 3-dioxygenase activity                                               |
| 2256 | GO:0016210 | Metabolism | Metabolism | F | naringenin-chalcone synthase activity                                           |
| 2257 | GO:0050126 | Metabolism | Metabolism | F | N-carbamoylputrescine amidase activity                                          |
| 2258 | GO:0019788 | Metabolism | Metabolism | F | NEDD8 transferase activity                                                      |
| 2259 | GO:0016151 | Metabolism | Metabolism | F | nickel cation binding                                                           |
| 2260 | GO:0030418 | Metabolism | Metabolism | P | nicotianamine biosynthetic process                                              |
| 2261 | GO:0030410 | Metabolism | Metabolism | F | nicotianamine synthase activity                                                 |
| 2262 | GO:0008936 | Metabolism | Metabolism | F | nicotinamidase activity                                                         |
| 2263 | GO:0000309 | Metabolism | Metabolism | F | nicotinamide-nucleotide adenylyltransferase activity                            |
| 2264 | GO:0004514 | Metabolism | Metabolism | F | nicotinate-nucleotide diphosphorylase (carboxylating) activity                  |
| 2265 | GO:0090704 | Metabolism | Metabolism | F | nicotinate-O-glucosyltransferase activity                                       |
| 2266 | GO:0042128 | Metabolism | Metabolism | P | nitrate assimilation                                                            |
| 2267 | GO:0042126 | Metabolism | Metabolism | P | nitrate metabolic process                                                       |
| 2268 | GO:0009671 | Metabolism | Metabolism | F | nitrate:proton symporter activity                                               |
| 2269 | GO:0080028 | Metabolism | Metabolism | P | nitrile biosynthetic process                                                    |
| 2270 | GO:0006807 | Metabolism | Metabolism | P | nitrogen compound metabolic process                                             |
| 2271 | GO:0071941 | Metabolism | Metabolism | P | nitrogen cycle metabolic process                                                |
| 2272 | GO:0019740 | Metabolism | Metabolism | P | nitrogen utilization                                                            |
| 2273 | GO:0018580 | Metabolism | Metabolism | F | nitronate monooxygenase activity                                                |
| 2274 | GO:0006607 | Metabolism | Metabolism | P | NLS-bearing protein import into nucleus                                         |
| 2275 | GO:0008170 | Metabolism | Metabolism | F | N-methyltransferase activity                                                    |
| 2276 | GO:0052894 | Metabolism | Metabolism | F | norspermine:oxygen oxidoreductase activity                                      |
| 2277 | GO:0018008 | Metabolism | Metabolism | P | N-terminal peptidyl-glycine N-myristoylation                                    |
| 2278 | GO:0017196 | Metabolism | Metabolism | P | N-terminal peptidyl-methionine acetylation                                      |
| 2279 | GO:0003676 | Metabolism | Metabolism | F | nucleic acid binding                                                            |
| 2280 | GO:0045735 | Metabolism | Metabolism | F | nutrient reservoir activity                                                     |
| 2281 | GO:0016413 | Metabolism | Metabolism | F | O-acetyltransferase activity                                                    |
| 2282 | GO:0009924 | Metabolism | Metabolism | F | octadecanal decarbonylase activity                                              |
| 2283 | GO:0120254 | Metabolism | Metabolism | P | olefinic compound metabolic process                                             |
| 2284 | GO:0070012 | Metabolism | Metabolism | F | oligopeptidase activity                                                         |
| 2285 | GO:1900750 | Metabolism | Metabolism | F | oligopeptide binding                                                            |
| 2286 | GO:0070492 | Metabolism | Metabolism | F | oligosaccharide binding                                                         |
| 2287 | GO:0006490 | Metabolism | Metabolism | P | oligosaccharide-lipid intermediate biosynthetic process                         |
| 2288 | GO:0004576 | Metabolism | Metabolism | F | oligosaccharyl transferase activity                                             |
| 2289 | GO:0008171 | Metabolism | Metabolism | F | O-methyltransferase activity                                                    |
| 2290 | GO:0006730 | Metabolism | Metabolism | P | one-carbon metabolic process                                                    |
| 2291 | GO:0004648 | Metabolism | Metabolism | F | O-phospho-L-serine:2-oxoglutarate aminotransferase activity                     |
| 2292 | GO:0016053 | Metabolism | Metabolism | P | organic acid biosynthetic process                                               |
| 2293 | GO:0006082 | Metabolism | Metabolism | P | organic acid metabolic process                                                  |
| 2294 | GO:0097159 | Metabolism | Metabolism | F | organic cyclic compound binding                                                 |
| 2295 | GO:1901362 | Metabolism | Metabolism | P | organic cyclic compound biosynthetic process                                    |
| 2296 | GO:1901360 | Metabolism | Metabolism | P | organic cyclic compound metabolic process                                       |
| 2297 | GO:1901617 | Metabolism | Metabolism | P | organic hydroxy compound biosynthetic process                                   |
| 2298 | GO:1901615 | Metabolism | Metabolism | P | organic hydroxy compound metabolic process                                      |
| 2299 | GO:1901576 | Metabolism | Metabolism | P | organic substance biosynthetic process                                          |
| 2300 | GO:0071704 | Metabolism | Metabolism | P | organic substance metabolic process                                             |

|      |            |            |            |   |                                                                    |
|------|------------|------------|------------|---|--------------------------------------------------------------------|
| 2301 | GO:1901566 | Metabolism | Metabolism | P | organonitrogen compound biosynthetic process                       |
| 2302 | GO:1901564 | Metabolism | Metabolism | P | organonitrogen compound metabolic process                          |
| 2303 | GO:0090407 | Metabolism | Metabolism | P | organophosphate biosynthetic process                               |
| 2304 | GO:0019637 | Metabolism | Metabolism | P | organophosphate metabolic process                                  |
| 2305 | GO:0008948 | Metabolism | Metabolism | F | oxaloacetate decarboxylase activity                                |
| 2306 | GO:0006107 | Metabolism | Metabolism | P | oxaloacetate metabolic process                                     |
| 2307 | GO:0018131 | Metabolism | Metabolism | P | oxazole or thiazole biosynthetic process                           |
| 2308 | GO:0055114 | Metabolism | Metabolism | P | oxidation-reduction process                                        |
| 2309 | GO:0017077 | Metabolism | Metabolism | F | oxidative phosphorylation uncoupler activity                       |
| 2310 | GO:0043436 | Metabolism | Metabolism | P | oxoacid metabolic process                                          |
| 2311 | GO:0019825 | Metabolism | Metabolism | F | oxygen binding                                                     |
| 2312 | GO:0004729 | Metabolism | Metabolism | F | oxygen-dependent protoporphyrinogen oxidase activity               |
| 2313 | GO:0031408 | Metabolism | Metabolism | P | oxylipin biosynthetic process                                      |
| 2314 | GO:0031407 | Metabolism | Metabolism | P | oxylipin metabolic process                                         |
| 2315 | GO:0004594 | Metabolism | Metabolism | F | pantothenate kinase activity                                       |
| 2316 | GO:0046482 | Metabolism | Metabolism | P | para-aminobenzoic acid metabolic process                           |
| 2317 | GO:0046409 | Metabolism | Metabolism | F | p-coumarate 3-hydroxylase activity                                 |
| 2318 | GO:0030570 | Metabolism | Metabolism | F | pectate lyase activity                                             |
| 2319 | GO:0010401 | Metabolism | Metabolism | P | pectic galactan metabolic process                                  |
| 2320 | GO:0052793 | Metabolism | Metabolism | F | pectin acetylesterase activity                                     |
| 2321 | GO:0045489 | Metabolism | Metabolism | P | pectin biosynthetic process                                        |
| 2322 | GO:0045488 | Metabolism | Metabolism | P | pectin metabolic process                                           |
| 2323 | GO:0030599 | Metabolism | Metabolism | F | pectinesterase activity                                            |
| 2324 | GO:0046910 | Metabolism | Metabolism | F | pectinesterase inhibitor activity                                  |
| 2325 | GO:0019321 | Metabolism | Metabolism | P | pentose metabolic process                                          |
| 2326 | GO:0042277 | Metabolism | Metabolism | F | peptide binding                                                    |
| 2327 | GO:0006518 | Metabolism | Metabolism | P | peptide metabolic process                                          |
| 2328 | GO:0017183 | Metabolism | Metabolism | P | peptidyl-diphthamide biosynthetic process from peptidyl-histidine  |
| 2329 | GO:0000048 | Metabolism | Metabolism | F | peptidyltransferase activity                                       |
| 2330 | GO:0052596 | Metabolism | Metabolism | F | phenethylamine:oxygen oxidoreductase (deaminating) activity        |
| 2331 | GO:0045548 | Metabolism | Metabolism | F | phenylalanine ammonia-lyase activity                               |
| 2332 | GO:0032442 | Metabolism | Metabolism | F | phenylcoumaran benzylic ether reductase activity                   |
| 2333 | GO:0009699 | Metabolism | Metabolism | P | phenylpropanoid biosynthetic process                               |
| 2334 | GO:0009698 | Metabolism | Metabolism | P | phenylpropanoid metabolic process                                  |
| 2335 | GO:0080124 | Metabolism | Metabolism | F | pheophytinase activity                                             |
| 2336 | GO:0006796 | Metabolism | Metabolism | P | phosphate-containing compound metabolic process                    |
| 2337 | GO:0070300 | Metabolism | Metabolism | F | phosphatidic acid binding                                          |
| 2338 | GO:0006656 | Metabolism | Metabolism | P | phosphatidylcholine biosynthetic process                           |
| 2339 | GO:0006646 | Metabolism | Metabolism | P | phosphatidylethanolamine biosynthetic process                      |
| 2340 | GO:0046471 | Metabolism | Metabolism | P | phosphatidylglycerol metabolic process                             |
| 2341 | GO:0035091 | Metabolism | Metabolism | F | phosphatidylinositol binding                                       |
| 2342 | GO:0006661 | Metabolism | Metabolism | P | phosphatidylinositol biosynthetic process                          |
| 2343 | GO:0034593 | Metabolism | Metabolism | P | phosphatidylinositol bisphosphate phosphatase activity             |
| 2344 | GO:0046488 | Metabolism | Metabolism | P | phosphatidylinositol metabolic process                             |
| 2345 | GO:0017176 | Metabolism | Metabolism | F | phosphatidylinositol N-acetylglucosaminyltransferase activity      |
| 2346 | GO:0008526 | Metabolism | Metabolism | F | phosphatidylinositol transfer activity                             |
| 2347 | GO:0043325 | Metabolism | Metabolism | F | phosphatidylinositol-3,4-bisphosphate binding                      |
| 2348 | GO:0080025 | Metabolism | Metabolism | F | phosphatidylinositol-3,5-bisphosphate binding                      |
| 2349 | GO:0005546 | Metabolism | Metabolism | F | phosphatidylinositol-4,5-bisphosphate binding                      |
| 2350 | GO:0006659 | Metabolism | Metabolism | P | phosphatidylserine biosynthetic process                            |
| 2351 | GO:0004609 | Metabolism | Metabolism | F | phosphatidylserine decarboxylase activity                          |
| 2352 | GO:0004610 | Metabolism | Metabolism | F | phosphoacetylglucosamine mutase activity                           |
| 2353 | GO:0004612 | Metabolism | Metabolism | F | phosphoenolpyruvate carboxykinase (ATP) activity                   |
| 2354 | GO:0008964 | Metabolism | Metabolism | F | phosphoenolpyruvate carboxylase activity                           |
| 2355 | GO:0000234 | Metabolism | Metabolism | F | phosphoethanolamine N-methyltransferase activity                   |
| 2356 | GO:0051752 | Metabolism | Metabolism | F | phosphoglucan, water dikinase activity                             |
| 2357 | GO:0102219 | Metabolism | Metabolism | F | phosphogluco-amylopectin water dikinase activity                   |
| 2358 | GO:0004614 | Metabolism | Metabolism | F | phosphoglucomutase activity                                        |
| 2359 | GO:0008114 | Metabolism | Metabolism | F | phosphogluconate 2-dehydrogenase activity                          |
| 2360 | GO:0004616 | Metabolism | Metabolism | F | phosphogluconate dehydrogenase (decarboxylating) activity          |
| 2361 | GO:0004617 | Metabolism | Metabolism | F | phosphoglycerate dehydrogenase activity                            |
| 2362 | GO:0005543 | Metabolism | Metabolism | F | phospholipid binding                                               |
| 2363 | GO:0008654 | Metabolism | Metabolism | P | phospholipid biosynthetic process                                  |
| 2364 | GO:0006644 | Metabolism | Metabolism | P | phospholipid metabolic process                                     |
| 2365 | GO:0052667 | Metabolism | Metabolism | F | phosphomethylethanolamine N-methyltransferase activity             |
| 2366 | GO:0004633 | Metabolism | Metabolism | F | phosphopantothenoylecysteine decarboxylase activity                |
| 2367 | GO:0004634 | Metabolism | Metabolism | F | phosphopyruvate hydratase activity                                 |
| 2368 | GO:0004637 | Metabolism | Metabolism | F | phosphoribosylamine-glycine ligase activity                        |
| 2369 | GO:0004643 | Metabolism | Metabolism | F | phosphoribosylaminoimidazolecarboxamide formyltransferase activity |
| 2370 | GO:0004640 | Metabolism | Metabolism | F | phosphoribosylanthranilate isomerase activity                      |
| 2371 | GO:0004641 | Metabolism | Metabolism | F | phosphoribosylformylglycinamide cyclo-ligase activity              |
| 2372 | GO:0008081 | Metabolism | Metabolism | F | phosphoric diester hydrolase activity                              |
| 2373 | GO:0042578 | Metabolism | Metabolism | F | phosphoric ester hydrolase activity                                |
| 2374 | GO:0006793 | Metabolism | Metabolism | P | phosphorus metabolic process                                       |
| 2375 | GO:0046838 | Metabolism | Metabolism | P | phosphorylated carbohydrate dephosphorylation                      |
| 2376 | GO:0016310 | Metabolism | Metabolism | P | phosphorylation                                                    |
| 2377 | GO:0016773 | Metabolism | Metabolism | F | phosphotransferase activity, alcohol group as acceptor             |
| 2378 | GO:0042372 | Metabolism | Metabolism | P | phyloquinone biosynthetic process                                  |

|      |            |            |            |   |                                                                  |
|------|------------|------------|------------|---|------------------------------------------------------------------|
| 2379 | GO:0010024 | Metabolism | Metabolism | P | phytochromobilin biosynthetic process                            |
| 2380 | GO:0046905 | Metabolism | Metabolism | F | phytoene synthase activity                                       |
| 2381 | GO:0033306 | Metabolism | Metabolism | P | phytol metabolic process                                         |
| 2382 | GO:0031409 | Metabolism | Metabolism | F | pigment binding                                                  |
| 2383 | GO:0046148 | Metabolism | Metabolism | P | pigment biosynthetic process                                     |
| 2384 | GO:0042440 | Metabolism | Metabolism | P | pigment metabolic process                                        |
| 2385 | GO:0006907 | Metabolism | Metabolism | P | pinocytosis                                                      |
| 2386 | GO:0052324 | Metabolism | Metabolism | P | plant-type cell wall cellulose biosynthetic process              |
| 2387 | GO:0052541 | Metabolism | Metabolism | P | plant-type cell wall cellulose metabolic process                 |
| 2388 | GO:0010236 | Metabolism | Metabolism | P | plastoquinone biosynthetic process                               |
| 2389 | GO:0006596 | Metabolism | Metabolism | P | polyamine biosynthetic process                                   |
| 2390 | GO:0006595 | Metabolism | Metabolism | P | polyamine metabolic process                                      |
| 2391 | GO:0046592 | Metabolism | Metabolism | F | polyamine oxidase activity                                       |
| 2392 | GO:0004650 | Metabolism | Metabolism | F | polygalacturonase activity                                       |
| 2393 | GO:0090353 | Metabolism | Metabolism | F | polygalacturonase inhibitor activity                             |
| 2394 | GO:0047262 | Metabolism | Metabolism | F | polygalacturonate 4-alpha-galacturonosyltransferase activity     |
| 2395 | GO:0019751 | Metabolism | Metabolism | P | polyol metabolic process                                         |
| 2396 | GO:0016094 | Metabolism | Metabolism | P | polyprenol biosynthetic process                                  |
| 2397 | GO:0002094 | Metabolism | Metabolism | F | polyprenyltransferase activity                                   |
| 2398 | GO:0008187 | Metabolism | Metabolism | F | poly-pyrimidine tract binding                                    |
| 2399 | GO:0030247 | Metabolism | Metabolism | F | polysaccharide binding                                           |
| 2400 | GO:0015288 | Metabolism | Metabolism | F | porin activity                                                   |
| 2401 | GO:0006778 | Metabolism | Metabolism | P | porphyrin-containing compound metabolic process                  |
| 2402 | GO:0090358 | Metabolism | Metabolism | P | positive regulation of tryptophan metabolic process              |
| 2403 | GO:0030955 | Metabolism | Metabolism | F | potassium ion binding                                            |
| 2404 | GO:0004664 | Metabolism | Metabolism | F | prephenate dehydratase activity                                  |
| 2405 | GO:0034308 | Metabolism | Metabolism | P | primary alcohol metabolic process                                |
| 2406 | GO:0008131 | Metabolism | Metabolism | F | primary amine oxidase activity                                   |
| 2407 | GO:0006561 | Metabolism | Metabolism | P | proline biosynthetic process                                     |
| 2408 | GO:0004657 | Metabolism | Metabolism | F | proline dehydrogenase activity                                   |
| 2409 | GO:1990404 | Metabolism | Metabolism | F | protein ADP-ribosylase activity                                  |
| 2410 | GO:0005515 | Metabolism | Metabolism | F | protein binding                                                  |
| 2411 | GO:0030674 | Metabolism | Metabolism | F | protein binding, bridging                                        |
| 2412 | GO:0008022 | Metabolism | Metabolism | F | protein C-terminus binding                                       |
| 2413 | GO:0004673 | Metabolism | Metabolism | F | protein histidine kinase activity                                |
| 2414 | GO:0043424 | Metabolism | Metabolism | F | protein histidine kinase binding                                 |
| 2415 | GO:0019538 | Metabolism | Metabolism | P | protein metabolic process                                        |
| 2416 | GO:0016262 | Metabolism | Metabolism | F | protein N-acetylglucosaminyltransferase activity                 |
| 2417 | GO:0008318 | Metabolism | Metabolism | F | protein prenyltransferase activity                               |
| 2418 | GO:0043394 | Metabolism | Metabolism | F | proteoglycan binding                                             |
| 2419 | GO:0015252 | Metabolism | Metabolism | F | proton channel activity                                          |
| 2420 | GO:0120029 | Metabolism | Metabolism | P | proton export across plasma membrane                             |
| 2421 | GO:0009982 | Metabolism | Metabolism | F | pseudouridine synthase activity                                  |
| 2422 | GO:0001522 | Metabolism | Metabolism | P | pseudouridine synthesis                                          |
| 2423 | GO:0009113 | Metabolism | Metabolism | P | purine nucleobase biosynthetic process                           |
| 2424 | GO:0006144 | Metabolism | Metabolism | P | purine nucleobase metabolic process                              |
| 2425 | GO:0034032 | Metabolism | Metabolism | P | purine nucleoside bisphosphate metabolic process                 |
| 2426 | GO:0009135 | Metabolism | Metabolism | P | purine nucleoside diphosphate metabolic process                  |
| 2427 | GO:0009145 | Metabolism | Metabolism | P | purine nucleoside triphosphate biosynthetic process              |
| 2428 | GO:0009144 | Metabolism | Metabolism | P | purine nucleoside triphosphate metabolic process                 |
| 2429 | GO:0017076 | Metabolism | Metabolism | F | purine nucleotide binding                                        |
| 2430 | GO:0006164 | Metabolism | Metabolism | P | purine nucleotide biosynthetic process                           |
| 2431 | GO:0006163 | Metabolism | Metabolism | P | purine nucleotide metabolic process                              |
| 2432 | GO:0009179 | Metabolism | Metabolism | P | purine ribonucleoside diphosphate metabolic process              |
| 2433 | GO:0035639 | Metabolism | Metabolism | F | purine ribonucleoside triphosphate binding                       |
| 2434 | GO:0009206 | Metabolism | Metabolism | P | purine ribonucleoside triphosphate biosynthetic process          |
| 2435 | GO:0009205 | Metabolism | Metabolism | P | purine ribonucleoside triphosphate metabolic process             |
| 2436 | GO:0032555 | Metabolism | Metabolism | F | purine ribonucleotide binding                                    |
| 2437 | GO:0009150 | Metabolism | Metabolism | P | purine ribonucleotide metabolic process                          |
| 2438 | GO:0072522 | Metabolism | Metabolism | P | purine-containing compound biosynthetic process                  |
| 2439 | GO:0072521 | Metabolism | Metabolism | P | purine-containing compound metabolic process                     |
| 2440 | GO:0009446 | Metabolism | Metabolism | P | putrescine biosynthetic process                                  |
| 2441 | GO:0033388 | Metabolism | Metabolism | P | putrescine biosynthetic process from arginine                    |
| 2442 | GO:0036381 | Metabolism | Metabolism | F | pyridoxal 5'-phosphate synthase (glutamine hydrolysing) activity |
| 2443 | GO:0042817 | Metabolism | Metabolism | P | pyridoxal metabolic process                                      |
| 2444 | GO:0030170 | Metabolism | Metabolism | F | pyridoxal phosphate binding                                      |
| 2445 | GO:0042823 | Metabolism | Metabolism | P | pyridoxal phosphate biosynthetic process                         |
| 2446 | GO:0004733 | Metabolism | Metabolism | F | pyridoxamine-phosphate oxidase activity                          |
| 2447 | GO:0008615 | Metabolism | Metabolism | P | pyridoxine biosynthetic process                                  |
| 2448 | GO:0019856 | Metabolism | Metabolism | P | pyrimidine nucleobase biosynthetic process                       |
| 2449 | GO:0006221 | Metabolism | Metabolism | P | pyrimidine nucleotide biosynthetic process                       |
| 2450 | GO:0006220 | Metabolism | Metabolism | P | pyrimidine nucleotide metabolic process                          |
| 2451 | GO:0016462 | Metabolism | Metabolism | F | pyrophosphatase activity                                         |
| 2452 | GO:0050242 | Metabolism | Metabolism | F | pyruvate, phosphate dikinase activity                            |
| 2453 | GO:0080043 | Metabolism | Metabolism | F | quercetin 3-O-glucosyltransferase activity                       |
| 2454 | GO:0102822 | Metabolism | Metabolism | F | quercetin 3'-O-methyltransferase activity                        |
| 2455 | GO:0030755 | Metabolism | Metabolism | F | quercetin 3-O-methyltransferase activity                         |
| 2456 | GO:0080046 | Metabolism | Metabolism | F | quercetin 4'-O-glucosyltransferase activity                      |

|      |            |            |            |   |                                                                          |
|------|------------|------------|------------|---|--------------------------------------------------------------------------|
| 2457 | GO:0080044 | Metabolism | Metabolism | F | quercetin 7-O-glucosyltransferase activity                               |
| 2458 | GO:0048038 | Metabolism | Metabolism | F | quinone binding                                                          |
| 2459 | GO:0016854 | Metabolism | Metabolism | F | racemase and epimerase activity                                          |
| 2460 | GO:0016857 | Metabolism | Metabolism | F | racemase and epimerase activity, acting on carbohydrates and derivatives |
| 2461 | GO:0010325 | Metabolism | Metabolism | P | raffinose family oligosaccharide biosynthetic process                    |
| 2462 | GO:0030904 | Metabolism | Metabolism | C | retromer complex                                                         |
| 2463 | GO:0010395 | Metabolism | Metabolism | P | rhamnogalacturonan I metabolic process                                   |
| 2464 | GO:0050255 | Metabolism | Metabolism | F | ribitol 2-dehydrogenase activity                                         |
| 2465 | GO:0009231 | Metabolism | Metabolism | P | riboflavin biosynthetic process                                          |
| 2466 | GO:0008531 | Metabolism | Metabolism | F | riboflavin kinase activity                                               |
| 2467 | GO:0004753 | Metabolism | Metabolism | F | saccharopine dehydrogenase activity                                      |
| 2468 | GO:0006557 | Metabolism | Metabolism | P | S-adenosylmethioninamine biosynthetic process                            |
| 2469 | GO:0006556 | Metabolism | Metabolism | P | S-adenosylmethionine biosynthetic process                                |
| 2470 | GO:0033353 | Metabolism | Metabolism | P | S-adenosylmethionine cycle                                               |
| 2471 | GO:0046500 | Metabolism | Metabolism | P | S-adenosylmethionine metabolic process                                   |
| 2472 | GO:0008757 | Metabolism | Metabolism | F | S-adenosylmethionine-dependent methyltransferase activity                |
| 2473 | GO:0034785 | Metabolism | Metabolism | F | salicylate 5-hydroxylase activity                                        |
| 2474 | GO:0005090 | Metabolism | Metabolism | F | Sar guanyl-nucleotide exchange factor activity                           |
| 2475 | GO:0102483 | Metabolism | Metabolism | F | scopolin beta-glucosidase activity                                       |
| 2476 | GO:1902652 | Metabolism | Metabolism | P | secondary alcohol metabolic process                                      |
| 2477 | GO:0019748 | Metabolism | Metabolism | P | secondary metabolic process                                              |
| 2478 | GO:0044550 | Metabolism | Metabolism | P | secondary metabolite biosynthetic process                                |
|      |            |            |            |   | sedoheptulose-7-phosphate:D-glyceraldehyde-3-phosphate                   |
| 2479 | GO:0004801 | Metabolism | Metabolism | F | glyceronetransferase activity                                            |
| 2480 | GO:0050278 | Metabolism | Metabolism | F | sedoheptulose-bisphosphatase activity                                    |
| 2481 | GO:0008430 | Metabolism | Metabolism | F | selenium binding                                                         |
| 2482 | GO:0001887 | Metabolism | Metabolism | P | selenium compound metabolic process                                      |
| 2483 | GO:0042989 | Metabolism | Metabolism | P | sequestering of actin monomers                                           |
| 2484 | GO:0070905 | Metabolism | Metabolism | F | serine binding                                                           |
| 2485 | GO:0004758 | Metabolism | Metabolism | F | serine C-palmitoyltransferase activity                                   |
| 2486 | GO:0009070 | Metabolism | Metabolism | P | serine family amino acid biosynthetic process                            |
| 2487 | GO:0009069 | Metabolism | Metabolism | P | serine family amino acid metabolic process                               |
| 2488 | GO:0009001 | Metabolism | Metabolism | F | serine O-acetyltransferase activity                                      |
| 2489 | GO:0008236 | Metabolism | Metabolism | F | serine-type peptidase activity                                           |
| 2490 | GO:0016144 | Metabolism | Metabolism | P | S-glycoside biosynthetic process                                         |
| 2491 | GO:0016143 | Metabolism | Metabolism | P | S-glycoside metabolic process                                            |
| 2492 | GO:0016987 | Metabolism | Metabolism | F | sigma factor activity                                                    |
| 2493 | GO:0050284 | Metabolism | Metabolism | F | sinapate 1-glucosyltransferase activity                                  |
| 2494 | GO:0047158 | Metabolism | Metabolism | F | sinapoylglucose-sinapoylglucose O-sinapoyltransferase activity           |
| 2495 | GO:0052747 | Metabolism | Metabolism | F | sinapyl alcohol dehydrogenase activity                                   |
| 2496 | GO:0032143 | Metabolism | Metabolism | F | single thymine insertion binding                                         |
| 2497 | GO:0019354 | Metabolism | Metabolism | P | siroheme biosynthetic process                                            |
| 2498 | GO:0016852 | Metabolism | Metabolism | F | sirohydrochlorin cobaltochelataase activity                              |
| 2499 | GO:0051266 | Metabolism | Metabolism | F | sirohydrochlorin ferrochelataase activity                                |
| 2500 | GO:0036094 | Metabolism | Metabolism | F | small molecule binding                                                   |
| 2501 | GO:0044283 | Metabolism | Metabolism | P | small molecule biosynthetic process                                      |
| 2502 | GO:0044281 | Metabolism | Metabolism | P | small molecule metabolic process                                         |
| 2503 | GO:0046523 | Metabolism | Metabolism | F | S-methyl-5-thioribose-1-phosphate isomerase activity                     |
| 2504 | GO:0120114 | Metabolism | Metabolism | C | Sm-like protein family complex                                           |
| 2505 | GO:0005483 | Metabolism | Metabolism | F | soluble NSF attachment protein activity                                  |
| 2506 | GO:0008295 | Metabolism | Metabolism | P | spermidine biosynthetic process                                          |
| 2507 | GO:0080088 | Metabolism | Metabolism | P | spermidine hydroxycinnamate conjugate biosynthetic process               |
| 2508 | GO:0008216 | Metabolism | Metabolism | P | spermidine metabolic process                                             |
| 2509 | GO:0004766 | Metabolism | Metabolism | F | spermidine synthase activity                                             |
| 2510 | GO:0006597 | Metabolism | Metabolism | P | spermine biosynthetic process                                            |
| 2511 | GO:0008215 | Metabolism | Metabolism | P | spermine metabolic process                                               |
| 2512 | GO:0016768 | Metabolism | Metabolism | F | spermine synthase activity                                               |
| 2513 | GO:0052901 | Metabolism | Metabolism | F | spermine:oxygen oxidoreductase (spermidine-forming) activity             |
| 2514 | GO:0008117 | Metabolism | Metabolism | F | sphinganine-1-phosphate aldolase activity                                |
| 2515 | GO:0046520 | Metabolism | Metabolism | P | sphingoid biosynthetic process                                           |
| 2516 | GO:0030148 | Metabolism | Metabolism | P | sphingolipid biosynthetic process                                        |
| 2517 | GO:0052631 | Metabolism | Metabolism | F | sphingolipid delta-8 desaturase activity                                 |
| 2518 | GO:0006665 | Metabolism | Metabolism | P | sphingolipid metabolic process                                           |
| 2519 | GO:0033188 | Metabolism | Metabolism | F | sphingomyelin synthase activity                                          |
| 2520 | GO:0000170 | Metabolism | Metabolism | F | sphingosine hydroxylase activity                                         |
| 2521 | GO:0080110 | Metabolism | Metabolism | P | sporopollenin biosynthetic process                                       |
| 2522 | GO:0035339 | Metabolism | Metabolism | C | SPOTS complex                                                            |
| 2523 | GO:0004506 | Metabolism | Metabolism | F | squalene monooxygenase activity                                          |
| 2524 | GO:0051996 | Metabolism | Metabolism | F | squalene synthase activity                                               |
| 2525 | GO:0102786 | Metabolism | Metabolism | F | stearoyl-[acp] desaturase activity                                       |
| 2526 | GO:0000104 | Metabolism | Metabolism | F | succinate dehydrogenase activity                                         |
| 2527 | GO:0006105 | Metabolism | Metabolism | P | succinate metabolic process                                              |
| 2528 | GO:0004575 | Metabolism | Metabolism | F | sucrose alpha-glucosidase activity                                       |
| 2529 | GO:0050307 | Metabolism | Metabolism | F | sucrose-phosphate phosphatase activity                                   |
| 2530 | GO:0004781 | Metabolism | Metabolism | F | sulfate adenyltransferase (ATP) activity                                 |
| 2531 | GO:0019419 | Metabolism | Metabolism | P | sulfate reduction                                                        |
| 2532 | GO:0046506 | Metabolism | Metabolism | P | sulfolipid biosynthetic process                                          |
| 2533 | GO:0008146 | Metabolism | Metabolism | F | sulfotransferase activity                                                |

|      |            |            |            |   |                                                                                     |
|------|------------|------------|------------|---|-------------------------------------------------------------------------------------|
| 2534 | GO:0000097 | Metabolism | Metabolism | P | sulfur amino acid biosynthetic process                                              |
| 2535 | GO:0000096 | Metabolism | Metabolism | P | sulfur amino acid metabolic process                                                 |
| 2536 | GO:1901681 | Metabolism | Metabolism | F | sulfur compound binding                                                             |
| 2537 | GO:0044272 | Metabolism | Metabolism | P | sulfur compound biosynthetic process                                                |
| 2538 | GO:0006790 | Metabolism | Metabolism | P | sulfur compound metabolic process                                                   |
| 2539 | GO:0050313 | Metabolism | Metabolism | F | sulfur dioxygenase activity                                                         |
| 2540 | GO:0016783 | Metabolism | Metabolism | F | sulfurtransferase activity                                                          |
| 2541 | GO:0099080 | Metabolism | Metabolism | C | supramolecular complex                                                              |
| 2542 | GO:0099512 | Metabolism | Metabolism | C | supramolecular fiber                                                                |
| 2543 | GO:0099081 | Metabolism | Metabolism | C | supramolecular polymer                                                              |
| 2544 | GO:0048488 | Metabolism | Metabolism | P | synaptic vesicle endocytosis                                                        |
| 2545 | GO:0019905 | Metabolism | Metabolism | F | syntaxin binding                                                                    |
| 2546 | GO:0017025 | Metabolism | Metabolism | F | TBP-class protein binding                                                           |
| 2547 | GO:0046246 | Metabolism | Metabolism | P | terpene biosynthetic process                                                        |
| 2548 | GO:0006721 | Metabolism | Metabolism | P | terpenoid metabolic process                                                         |
| 2549 | GO:0035999 | Metabolism | Metabolism | P | tetrahydrofolate interconversion                                                    |
| 2550 | GO:0046653 | Metabolism | Metabolism | P | tetrahydrofolate metabolic process                                                  |
| 2551 | GO:0046906 | Metabolism | Metabolism | F | tetrapyrrole binding                                                                |
| 2552 | GO:0033014 | Metabolism | Metabolism | P | tetrapyrrole biosynthetic process                                                   |
| 2553 | GO:0033013 | Metabolism | Metabolism | P | tetrapyrrole metabolic process                                                      |
| 2554 | GO:0009228 | Metabolism | Metabolism | P | thiamine biosynthetic process                                                       |
| 2555 | GO:0009229 | Metabolism | Metabolism | P | thiamine diphosphate biosynthetic process                                           |
| 2556 | GO:0030976 | Metabolism | Metabolism | F | thiamine pyrophosphate binding                                                      |
| 2557 | GO:0035384 | Metabolism | Metabolism | P | thioester biosynthetic process                                                      |
| 2558 | GO:0035383 | Metabolism | Metabolism | P | thioester metabolic process                                                         |
| 2559 | GO:0019137 | Metabolism | Metabolism | F | thioglucosidase activity                                                            |
| 2560 | GO:0010180 | Metabolism | Metabolism | F | thioglucosidase binding                                                             |
| 2561 | GO:0010169 | Metabolism | Metabolism | C | thioglucosidase complex                                                             |
| 2562 | GO:0018708 | Metabolism | Metabolism | F | thiol S-methyltransferase activity                                                  |
| 2563 | GO:0004791 | Metabolism | Metabolism | F | thioredoxin-disulfide reductase activity                                            |
| 2564 | GO:0004793 | Metabolism | Metabolism | F | threonine aldolase activity                                                         |
| 2565 | GO:0009088 | Metabolism | Metabolism | P | threonine biosynthetic process                                                      |
| 2566 | GO:0004797 | Metabolism | Metabolism | F | thymidine kinase activity                                                           |
| 2567 | GO:0046104 | Metabolism | Metabolism | P | thymidine metabolic process                                                         |
| 2568 | GO:0008483 | Metabolism | Metabolism | F | transaminase activity                                                               |
| 2569 | GO:0016710 | Metabolism | Metabolism | F | trans-cinnamate 4-monooxygenase activity                                            |
| 2570 | GO:0016740 | Metabolism | Metabolism | F | transferase activity                                                                |
| 2571 | GO:0016746 | Metabolism | Metabolism | F | transferase activity, transferring acyl groups                                      |
| 2572 | GO:0016747 | Metabolism | Metabolism | F | transferase activity, transferring acyl groups other than amino-acyl groups         |
|      |            |            |            |   | transferase activity, transferring acyl groups, acyl groups converted into alkyl on |
| 2573 | GO:0046912 | Metabolism | Metabolism | F | transfer                                                                            |
| 2574 | GO:0016765 | Metabolism | Metabolism | F | transferase activity, transferring alkyl or aryl (other than methyl) groups         |
| 2575 | GO:0016757 | Metabolism | Metabolism | F | transferase activity, transferring glycosyl groups                                  |
| 2576 | GO:0016758 | Metabolism | Metabolism | F | transferase activity, transferring hexosyl groups                                   |
| 2577 | GO:0016769 | Metabolism | Metabolism | F | transferase activity, transferring nitrogenous groups                               |
| 2578 | GO:0016741 | Metabolism | Metabolism | F | transferase activity, transferring one-carbon groups                                |
| 2579 | GO:1990234 | Metabolism | Metabolism | C | transferase complex                                                                 |
| 2580 | GO:0061695 | Metabolism | Metabolism | C | transferase complex, transferring phosphorus-containing groups                      |
| 2581 | GO:0046914 | Metabolism | Metabolism | F | transition metal ion binding                                                        |
| 2582 | GO:0019985 | Metabolism | Metabolism | P | translesion synthesis                                                               |
| 2583 | GO:0050347 | Metabolism | Metabolism | F | trans-octaprenyltranstransferase activity                                           |
| 2584 | GO:0019346 | Metabolism | Metabolism | P | transsulfuration                                                                    |
| 2585 | GO:0072532 | Metabolism | Metabolism | F | tri-(feruloyl or hydroxyferuloyl) spermidine meta-hydroxylase activity              |
| 2586 | GO:0072547 | Metabolism | Metabolism | F | tricoumaroylspermidine meta-hydroxylase activity                                    |
| 2587 | GO:0102701 | Metabolism | Metabolism | F | tricyclene synthase activity                                                        |
| 2588 | GO:0072550 | Metabolism | Metabolism | F | triferuloylspermidine meta-hydroxylase activity                                     |
| 2589 | GO:0019432 | Metabolism | Metabolism | P | triglyceride biosynthetic process                                                   |
| 2590 | GO:0004806 | Metabolism | Metabolism | F | triglyceride lipase activity                                                        |
| 2591 | GO:0006641 | Metabolism | Metabolism | P | triglyceride metabolic process                                                      |
| 2592 | GO:0004807 | Metabolism | Metabolism | F | triose-phosphate isomerase activity                                                 |
| 2593 | GO:0016104 | Metabolism | Metabolism | P | triterpenoid biosynthetic process                                                   |
| 2594 | GO:0052593 | Metabolism | Metabolism | F | tryptamine:oxygen oxidoreductase (deaminating) activity                             |
| 2595 | GO:0000162 | Metabolism | Metabolism | P | tryptophan biosynthetic process                                                     |
| 2596 | GO:0006568 | Metabolism | Metabolism | P | tryptophan metabolic process                                                        |
| 2597 | GO:0004834 | Metabolism | Metabolism | F | tryptophan synthase activity                                                        |
| 2598 | GO:0015631 | Metabolism | Metabolism | F | tubulin binding                                                                     |
| 2599 | GO:0045298 | Metabolism | Metabolism | C | tubulin complex                                                                     |
| 2600 | GO:1901695 | Metabolism | Metabolism | P | tyramine biosynthetic process                                                       |
| 2601 | GO:0004837 | Metabolism | Metabolism | F | tyrosine decarboxylase activity                                                     |
| 2602 | GO:0006570 | Metabolism | Metabolism | P | tyrosine metabolic process                                                          |
| 2603 | GO:0010489 | Metabolism | Metabolism | F | UDP-4-keto-6-deoxy-glucose-3,5-epimerase activity                                   |
| 2604 | GO:0010490 | Metabolism | Metabolism | F | UDP-4-keto-rhamnose-4-keto-reductase activity                                       |
| 2605 | GO:0052691 | Metabolism | Metabolism | F | UDP-arabinopyranose mutase activity                                                 |
| 2606 | GO:0050373 | Metabolism | Metabolism | F | UDP-arabinose 4-epimerase activity                                                  |
| 2607 | GO:0033320 | Metabolism | Metabolism | P | UDP-D-xylose biosynthetic process                                                   |
| 2608 | GO:0035250 | Metabolism | Metabolism | F | UDP-galactosyltransferase activity                                                  |
| 2609 | GO:0050377 | Metabolism | Metabolism | F | UDP-glucose 4,6-dehydratase activity                                                |
| 2610 | GO:0003978 | Metabolism | Metabolism | F | UDP-glucose 4-epimerase activity                                                    |

|      |            |            |                |   |                                                              |
|------|------------|------------|----------------|---|--------------------------------------------------------------|
| 2611 | GO:0003979 | Metabolism | Metabolism     | F | UDP-glucose 6-dehydrogenase activity                         |
| 2612 | GO:0006011 | Metabolism | Metabolism     | P | UDP-glucose metabolic process                                |
| 2613 | GO:0080002 | Metabolism | Metabolism     | F | UDP-glucose:4-aminobenzoate acylglucosyltransferase activity |
| 2614 | GO:0035251 | Metabolism | Metabolism     | F | UDP-glucosyltransferase activity                             |
| 2615 | GO:0050378 | Metabolism | Metabolism     | F | UDP-glucuronate 4-epimerase activity                         |
| 2616 | GO:0006065 | Metabolism | Metabolism     | P | UDP-glucuronate biosynthetic process                         |
| 2617 | GO:0048040 | Metabolism | Metabolism     | F | UDP-glucuronate decarboxylase activity                       |
| 2618 | GO:0046398 | Metabolism | Metabolism     | P | UDP-glucuronate metabolic process                            |
| 2619 | GO:0008194 | Metabolism | Metabolism     | F | UDP-glycosyltransferase activity                             |
| 2620 | GO:0033358 | Metabolism | Metabolism     | P | UDP-L-arabinose biosynthetic process                         |
| 2621 | GO:0033356 | Metabolism | Metabolism     | P | UDP-L-arabinose metabolic process                            |
| 2622 | GO:0010280 | Metabolism | Metabolism     | F | UDP-L-rhamnose synthase activity                             |
| 2623 | GO:0006048 | Metabolism | Metabolism     | P | UDP-N-acetylglucosamine biosynthetic process                 |
| 2624 | GO:0010253 | Metabolism | Metabolism     | P | UDP-rhamnose biosynthetic process                            |
| 2625 | GO:0033478 | Metabolism | Metabolism     | P | UDP-rhamnose metabolic process                               |
| 2626 | GO:0046510 | Metabolism | Metabolism     | F | UDP-sulfoquinovose:DAG sulfoquinovosyltransferase activity   |
| 2627 | GO:0035252 | Metabolism | Metabolism     | F | UDP-xylosyltransferase activity                              |
| 2628 | GO:0071568 | Metabolism | Metabolism     | F | UFM1 transferase activity                                    |
| 2629 | GO:0002058 | Metabolism | Metabolism     | F | uracil binding                                               |
| 2630 | GO:0006063 | Metabolism | Metabolism     | P | uronic acid metabolic process                                |
| 2631 | GO:0006228 | Metabolism | Metabolism     | P | UTP biosynthetic process                                     |
| 2632 | GO:0003983 | Metabolism | Metabolism     | F | UTP:glucose-1-phosphate uridylyltransferase activity         |
| 2633 | GO:0007035 | Metabolism | Metabolism     | P | vacuolar acidification                                       |
| 2634 | GO:0006624 | Metabolism | Metabolism     | P | vacuolar protein processing                                  |
| 2635 | GO:0010209 | Metabolism | Metabolism     | F | vacuolar sorting signal binding                              |
| 2636 | GO:0009099 | Metabolism | Metabolism     | P | valine biosynthetic process                                  |
| 2637 | GO:0070279 | Metabolism | Metabolism     | F | vitamin B6 binding                                           |
| 2638 | GO:0042819 | Metabolism | Metabolism     | P | vitamin B6 biosynthetic process                              |
| 2639 | GO:0019842 | Metabolism | Metabolism     | F | vitamin binding                                              |
| 2640 | GO:0010025 | Metabolism | Metabolism     | P | wax biosynthetic process                                     |
| 2641 | GO:0010166 | Metabolism | Metabolism     | P | wax metabolic process                                        |
| 2642 | GO:0016123 | Metabolism | Metabolism     | P | xanthophyll biosynthetic process                             |
| 2643 | GO:0010301 | Metabolism | Metabolism     | F | xanthoxin dehydrogenase activity                             |
| 2644 | GO:0006805 | Metabolism | Metabolism     | P | xenobiotic metabolic process                                 |
| 2645 | GO:0045492 | Metabolism | Metabolism     | P | xylan biosynthetic process                                   |
| 2646 | GO:0045491 | Metabolism | Metabolism     | P | xylan metabolic process                                      |
| 2647 | GO:1990538 | Metabolism | Metabolism     | F | xylan O-acetyltransferase activity                           |
| 2648 | GO:0010089 | Metabolism | Metabolism     | P | xylem development                                            |
| 2649 | GO:0033843 | Metabolism | Metabolism     | F | xyloglucan 6-xylosyltransferase activity                     |
| 2650 | GO:0009969 | Metabolism | Metabolism     | P | xyloglucan biosynthetic process                              |
| 2651 | GO:0010411 | Metabolism | Metabolism     | P | xyloglucan metabolic process                                 |
| 2652 | GO:0016762 | Metabolism | Metabolism     | F | xyloglucan:xyloglucosyl transferase activity                 |
| 2653 | GO:0033946 | Metabolism | Metabolism     | F | xyloglucan-specific endo-beta-1,4-glucanase activity         |
| 2654 | GO:0009045 | Metabolism | Metabolism     | F | xylose isomerase activity                                    |
| 2655 | GO:0009974 | Metabolism | Metabolism     | F | zeinoxanthin epsilon hydroxylase activity                    |
| 2656 | GO:0008270 | Metabolism | Metabolism     | F | zinc ion binding                                             |
| 2657 | GO:0009882 | Metabolism | Photosynthesis | F | blue light photoreceptor activity                            |
| 2658 | GO:0015977 | Metabolism | Photosynthesis | P | carbon fixation                                              |
| 2659 | GO:0016120 | Metabolism | Photosynthesis | P | carotene biosynthetic process                                |
| 2660 | GO:0016117 | Metabolism | Photosynthesis | P | carotenoid biosynthetic process                              |
| 2661 | GO:0016168 | Metabolism | Photosynthesis | F | chlorophyll binding                                          |
| 2662 | GO:0015995 | Metabolism | Photosynthesis | P | chlorophyll biosynthetic process                             |
| 2663 | GO:0015994 | Metabolism | Photosynthesis | P | chlorophyll metabolic process                                |
| 2664 | GO:0046408 | Metabolism | Photosynthesis | F | chlorophyll synthetase activity                              |
| 2665 | GO:0010277 | Metabolism | Photosynthesis | F | chlorophyllide a oxygenase [overall] activity                |
| 2666 | GO:0009507 | Metabolism | Photosynthesis | C | chloroplast                                                  |
| 2667 | GO:0009904 | Metabolism | Photosynthesis | P | chloroplast accumulation movement                            |
| 2668 | GO:0009544 | Metabolism | Photosynthesis | C | chloroplast ATP synthase complex                             |
| 2669 | GO:0009903 | Metabolism | Photosynthesis | P | chloroplast avoidance movement                               |
| 2670 | GO:0010151 | Metabolism | Photosynthesis | P | chloroplast elongation                                       |
| 2671 | GO:0009941 | Metabolism | Photosynthesis | C | chloroplast envelope                                         |
| 2672 | GO:0010020 | Metabolism | Photosynthesis | P | chloroplast fission                                          |
| 2673 | GO:0009706 | Metabolism | Photosynthesis | C | chloroplast inner membrane                                   |
| 2674 | GO:0031972 | Metabolism | Photosynthesis | C | chloroplast intermembrane space                              |
| 2675 | GO:0019750 | Metabolism | Photosynthesis | P | chloroplast localization                                     |
| 2676 | GO:0031969 | Metabolism | Photosynthesis | C | chloroplast membrane                                         |
| 2677 | GO:0042644 | Metabolism | Photosynthesis | C | chloroplast nucleoid                                         |
| 2678 | GO:0009658 | Metabolism | Photosynthesis | P | chloroplast organization                                     |
| 2679 | GO:0009707 | Metabolism | Photosynthesis | C | chloroplast outer membrane                                   |
| 2680 | GO:0030093 | Metabolism | Photosynthesis | C | chloroplast photosystem I                                    |
| 2681 | GO:0009902 | Metabolism | Photosynthesis | P | chloroplast relocation                                       |
| 2682 | GO:0043253 | Metabolism | Photosynthesis | C | chloroplast ribosome                                         |
| 2683 | GO:0031425 | Metabolism | Photosynthesis | P | chloroplast RNA processing                                   |
| 2684 | GO:1901259 | Metabolism | Photosynthesis | P | chloroplast rRNA processing                                  |
| 2685 | GO:0009569 | Metabolism | Photosynthesis | C | chloroplast starch grain                                     |
| 2686 | GO:0009570 | Metabolism | Photosynthesis | C | chloroplast stroma                                           |
| 2687 | GO:0009533 | Metabolism | Photosynthesis | C | chloroplast stromal thylakoid                                |
| 2688 | GO:0009534 | Metabolism | Photosynthesis | C | chloroplast thylakoid                                        |

|      |            |            |                |   |                                                                                   |
|------|------------|------------|----------------|---|-----------------------------------------------------------------------------------|
| 2689 | GO:0009543 | Metabolism | Photosynthesis | C | chloroplast thylakoid lumen                                                       |
| 2690 | GO:0009535 | Metabolism | Photosynthesis | C | chloroplast thylakoid membrane                                                    |
| 2691 | GO:0098807 | Metabolism | Photosynthesis | C | chloroplast thylakoid membrane protein complex                                    |
| 2692 | GO:0009840 | Metabolism | Photosynthesis | C | chloroplastic endopeptidase Clp complex                                           |
| 2693 | GO:0010019 | Metabolism | Photosynthesis | P | chloroplast-nucleus signaling pathway                                             |
| 2694 | GO:0009575 | Metabolism | Photosynthesis | C | chromoplast stroma                                                                |
| 2695 | GO:0009512 | Metabolism | Photosynthesis | C | cytochrome b6f complex                                                            |
| 2696 | GO:0010190 | Metabolism | Photosynthesis | P | cytochrome b6f complex assembly                                                   |
| 2697 | GO:0046028 | Metabolism | Photosynthesis | F | electron transporter, transferring electrons from cytochrome b6/f complex of      |
|      |            |            |                |   | photosystem II activity                                                           |
|      |            |            |                |   | electron transporter, transferring electrons within cytochrome b6/f complex of    |
| 2698 | GO:0045158 | Metabolism | Photosynthesis | F | photosystem II activity                                                           |
|      |            |            |                |   | electron transporter, transferring electrons within the cyclic electron transport |
| 2699 | GO:0045156 | Metabolism | Photosynthesis | F | pathway of photosynthesis activity                                                |
|      |            |            |                |   | electron transporter, transferring electrons within the noncyclic electron        |
|      |            |            |                |   | transport pathway of photosynthesis activity                                      |
| 2700 | GO:0045157 | Metabolism | Photosynthesis | F | transport pathway of photosynthesis activity                                      |
| 2701 | GO:1990066 | Metabolism | Photosynthesis | P | energy quenching                                                                  |
| 2702 | GO:0051667 | Metabolism | Photosynthesis | P | establishment of plastid localization                                             |
| 2703 | GO:0035448 | Metabolism | Photosynthesis | C | extrinsic component of thylakoid membrane                                         |
| 2704 | GO:0004324 | Metabolism | Photosynthesis | F | ferredoxin-NADP+ reductase activity                                               |
| 2705 | GO:0042132 | Metabolism | Photosynthesis | F | fructose 1,6-bisphosphate 1-phosphatase activity                                  |
| 2706 | GO:0030388 | Metabolism | Photosynthesis | P | fructose 1,6-bisphosphate metabolic process                                       |
| 2707 | GO:0006002 | Metabolism | Photosynthesis | P | fructose 6-phosphate metabolic process                                            |
| 2708 | GO:0004332 | Metabolism | Photosynthesis | F | fructose-bisphosphate aldolase activity                                           |
| 2709 | GO:0009515 | Metabolism | Photosynthesis | C | granal stacked thylakoid                                                          |
| 2710 | GO:0006783 | Metabolism | Photosynthesis | P | heme biosynthetic process                                                         |
| 2711 | GO:0006788 | Metabolism | Photosynthesis | P | heme oxidation                                                                    |
| 2712 | GO:0004392 | Metabolism | Photosynthesis | F | heme oxygenase (decyclizing) activity                                             |
| 2713 | GO:0031357 | Metabolism | Photosynthesis | C | integral component of chloroplast inner membrane                                  |
| 2714 | GO:0031361 | Metabolism | Photosynthesis | C | integral component of thylakoid membrane                                          |
| 2715 | GO:0010007 | Metabolism | Photosynthesis | C | magnesium chelatase complex                                                       |
| 2716 | GO:1902325 | Metabolism | Photosynthesis | P | negative regulation of chlorophyll biosynthetic process                           |
| 2717 | GO:1905156 | Metabolism | Photosynthesis | P | negative regulation of photosynthesis                                             |
| 2718 | GO:0080153 | Metabolism | Photosynthesis | P | negative regulation of reductive pentose-phosphate cycle                          |
| 2719 | GO:0009854 | Metabolism | Photosynthesis | P | oxidative photosynthetic carbon pathway                                           |
| 2720 | GO:0010242 | Metabolism | Photosynthesis | F | oxygen evolving activity                                                          |
| 2721 | GO:0009915 | Metabolism | Photosynthesis | P | phloem sucrose loading                                                            |
| 2722 | GO:0110128 | Metabolism | Photosynthesis | P | phloem sucrose unloading                                                          |
| 2723 | GO:0015979 | Metabolism | Photosynthesis | P | photosynthesis                                                                    |
| 2724 | GO:0019685 | Metabolism | Photosynthesis | P | photosynthesis, dark reaction                                                     |
| 2725 | GO:0009765 | Metabolism | Photosynthesis | P | photosynthesis, light harvesting                                                  |
| 2726 | GO:0009768 | Metabolism | Photosynthesis | P | photosynthesis, light harvesting in photosystem I                                 |
| 2727 | GO:0009769 | Metabolism | Photosynthesis | P | photosynthesis, light harvesting in photosystem II                                |
| 2728 | GO:0019684 | Metabolism | Photosynthesis | P | photosynthesis, light reaction                                                    |
| 2729 | GO:0009643 | Metabolism | Photosynthesis | P | photosynthetic acclimation                                                        |
| 2730 | GO:0009767 | Metabolism | Photosynthesis | P | photosynthetic electron transport chain                                           |
| 2731 | GO:0009773 | Metabolism | Photosynthesis | P | photosynthetic electron transport in photosystem I                                |
| 2732 | GO:0009772 | Metabolism | Photosynthesis | P | photosynthetic electron transport in photosystem II                               |
| 2733 | GO:0034357 | Metabolism | Photosynthesis | C | photosynthetic membrane                                                           |
| 2734 | GO:0009521 | Metabolism | Photosynthesis | C | photosystem                                                                       |
| 2735 | GO:0009522 | Metabolism | Photosynthesis | C | photosystem I                                                                     |
| 2736 | GO:0009782 | Metabolism | Photosynthesis | C | photosystem I antenna complex                                                     |
| 2737 | GO:0048564 | Metabolism | Photosynthesis | P | photosystem I assembly                                                            |
| 2738 | GO:0009538 | Metabolism | Photosynthesis | C | photosystem I reaction center                                                     |
| 2739 | GO:0009523 | Metabolism | Photosynthesis | C | photosystem II                                                                    |
| 2740 | GO:0009783 | Metabolism | Photosynthesis | C | photosystem II antenna complex                                                    |
| 2741 | GO:0010207 | Metabolism | Photosynthesis | P | photosystem II assembly                                                           |
| 2742 | GO:0009654 | Metabolism | Photosynthesis | C | photosystem II oxygen evolving complex                                            |
| 2743 | GO:0010270 | Metabolism | Photosynthesis | P | photosystem II oxygen evolving complex assembly                                   |
| 2744 | GO:0009539 | Metabolism | Photosynthesis | C | photosystem II reaction center                                                    |
| 2745 | GO:0010206 | Metabolism | Photosynthesis | P | photosystem II repair                                                             |
| 2746 | GO:0042549 | Metabolism | Photosynthesis | P | photosystem II stabilization                                                      |
| 2747 | GO:0080005 | Metabolism | Photosynthesis | P | photosystem stoichiometry adjustment                                              |
| 2748 | GO:0009536 | Metabolism | Photosynthesis | C | plastid                                                                           |
| 2749 | GO:0009508 | Metabolism | Photosynthesis | C | plastid chromosome                                                                |
| 2750 | GO:0009526 | Metabolism | Photosynthesis | C | plastid envelope                                                                  |
| 2751 | GO:0009528 | Metabolism | Photosynthesis | C | plastid inner membrane                                                            |
| 2752 | GO:0000311 | Metabolism | Photosynthesis | C | plastid large ribosomal subunit                                                   |
| 2753 | GO:0051644 | Metabolism | Photosynthesis | P | plastid localization                                                              |
| 2754 | GO:0042170 | Metabolism | Photosynthesis | C | plastid membrane                                                                  |
| 2755 | GO:0009668 | Metabolism | Photosynthesis | P | plastid membrane organization                                                     |
| 2756 | GO:0042646 | Metabolism | Photosynthesis | C | plastid nucleoid                                                                  |
| 2757 | GO:0009657 | Metabolism | Photosynthesis | P | plastid organization                                                              |
| 2758 | GO:0009527 | Metabolism | Photosynthesis | C | plastid outer membrane                                                            |
| 2759 | GO:0009547 | Metabolism | Photosynthesis | C | plastid ribosome                                                                  |
| 2760 | GO:0000312 | Metabolism | Photosynthesis | C | plastid small ribosomal subunit                                                   |
| 2761 | GO:0009532 | Metabolism | Photosynthesis | C | plastid stroma                                                                    |
| 2762 | GO:0031976 | Metabolism | Photosynthesis | C | plastid thylakoid                                                                 |



|      |            |            |                |   |                                                                          |
|------|------------|------------|----------------|---|--------------------------------------------------------------------------|
| 2763 | GO:0031978 | Metabolism | Photosynthesis | C | plastid thylakoid lumen                                                  |
| 2764 | GO:0055035 | Metabolism | Photosynthesis | C | plastid thylakoid membrane                                               |
| 2765 | GO:0042793 | Metabolism | Photosynthesis | P | plastid transcription                                                    |
| 2766 | GO:0032544 | Metabolism | Photosynthesis | P | plastid translation                                                      |
| 2767 | GO:0010287 | Metabolism | Photosynthesis | C | plastoglobule                                                            |
| 2768 | GO:0080177 | Metabolism | Photosynthesis | P | plastoglobule organization                                               |
| 2769 | GO:0009496 | Metabolism | Photosynthesis | F | plastoquinol--plastocyanin reductase activity                            |
| 2770 | GO:0006779 | Metabolism | Photosynthesis | P | porphyrin-containing compound biosynthetic process                       |
| 2771 | GO:1902326 | Metabolism | Photosynthesis | P | positive regulation of chlorophyll biosynthetic process                  |
| 2772 | GO:1905157 | Metabolism | Photosynthesis | P | positive regulation of photosynthesis                                    |
| 2773 | GO:0045037 | Metabolism | Photosynthesis | P | protein import into chloroplast stroma                                   |
| 2774 | GO:0045038 | Metabolism | Photosynthesis | P | protein import into chloroplast thylakoid membrane                       |
| 2775 | GO:0072598 | Metabolism | Photosynthesis | P | protein localization to chloroplast                                      |
| 2776 | GO:0045036 | Metabolism | Photosynthesis | P | protein targeting to chloroplast                                         |
| 2777 | GO:0018298 | Metabolism | Photosynthesis | P | protein-chromophore linkage                                              |
| 2778 | GO:0016630 | Metabolism | Photosynthesis | F | protochlorophyllide reductase activity                                   |
| 2779 | GO:0006782 | Metabolism | Photosynthesis | P | protoporphyrinogen IX biosynthetic process                               |
| 2780 | GO:0009517 | Metabolism | Photosynthesis | C | PSII associated light-harvesting complex II                              |
| 2781 | GO:0031540 | Metabolism | Photosynthesis | P | regulation of anthocyanin biosynthetic process                           |
| 2782 | GO:0010380 | Metabolism | Photosynthesis | P | regulation of chlorophyll biosynthetic process                           |
| 2783 | GO:0043467 | Metabolism | Photosynthesis | P | regulation of generation of precursor metabolites and energy             |
| 2784 | GO:0010109 | Metabolism | Photosynthesis | P | regulation of photosynthesis                                             |
| 2785 | GO:0042548 | Metabolism | Photosynthesis | P | regulation of photosynthesis, light reaction                             |
| 2786 | GO:1904215 | Metabolism | Photosynthesis | P | regulation of protein import into chloroplast stroma                     |
| 2787 | GO:0046863 | Metabolism | Photosynthesis | F | ribulose-1,5-bisphosphate carboxylase/oxygenase activator activity       |
| 2788 | GO:0016984 | Metabolism | Photosynthesis | F | ribulose-bisphosphate carboxylase activity                               |
| 2789 | GO:0098572 | Metabolism | Photosynthesis | C | stromal side of plastid thylakoid membrane                               |
| 2790 | GO:0016114 | Metabolism | Photosynthesis | P | terpenoid biosynthetic process                                           |
| 2791 | GO:0009579 | Metabolism | Photosynthesis | C | thylakoid                                                                |
| 2792 | GO:0031977 | Metabolism | Photosynthesis | C | thylakoid lumen                                                          |
| 2793 | GO:0042651 | Metabolism | Photosynthesis | C | thylakoid membrane                                                       |
| 2794 | GO:0010027 | Metabolism | Photosynthesis | P | thylakoid membrane organization                                          |
| 2795 | GO:0031897 | Metabolism | Photosynthesis | C | Tic complex                                                              |
| 2796 | GO:0010006 | Metabolism | Photosynthesis | C | Toc complex                                                              |
| 2797 | GO:0061927 | Metabolism | Photosynthesis | C | TOC-TIC supercomplex I                                                   |
| 2798 | GO:0051738 | Metabolism | Photosynthesis | F | xanthophyll binding                                                      |
| 2799 | GO:0046964 | Metabolism | Transporters   | F | 3'-phosphoadenosine 5'-phosphosulfate transmembrane transporter activity |
| 2800 | GO:0015172 | Metabolism | Transporters   | F | acidic amino acid transmembrane transporter activity                     |
| 2801 | GO:0015800 | Metabolism | Transporters   | P | acidic amino acid transport                                              |
| 2802 | GO:0046715 | Metabolism | Transporters   | F | active borate transmembrane transporter activity                         |
| 2803 | GO:0022853 | Metabolism | Transporters   | F | active ion transmembrane transporter activity                            |
| 2804 | GO:0022804 | Metabolism | Transporters   | F | active transmembrane transporter activity                                |
| 2805 | GO:0034196 | Metabolism | Transporters   | P | acylglycerol transport                                                   |
| 2806 | GO:0051503 | Metabolism | Transporters   | P | adenine nucleotide transport                                             |
| 2807 | GO:0015720 | Metabolism | Transporters   | P | allantoin transport                                                      |
| 2808 | GO:0005274 | Metabolism | Transporters   | F | allantoin:proton symporter activity                                      |
| 2809 | GO:0043090 | Metabolism | Transporters   | P | amino acid import                                                        |
| 2810 | GO:0003333 | Metabolism | Transporters   | P | amino acid transmembrane transport                                       |
| 2811 | GO:0015171 | Metabolism | Transporters   | F | amino acid transmembrane transporter activity                            |
| 2812 | GO:0006865 | Metabolism | Transporters   | P | amino acid transport                                                     |
| 2813 | GO:0008519 | Metabolism | Transporters   | F | ammonium transmembrane transporter activity                              |
| 2814 | GO:0005253 | Metabolism | Transporters   | F | anion channel activity                                                   |
| 2815 | GO:0098656 | Metabolism | Transporters   | P | anion transmembrane transport                                            |
| 2816 | GO:0008509 | Metabolism | Transporters   | F | anion transmembrane transporter activity                                 |
| 2817 | GO:0006820 | Metabolism | Transporters   | P | anion transport                                                          |
| 2818 | GO:0015301 | Metabolism | Transporters   | F | anion:anion antiporter activity                                          |
| 2819 | GO:0015297 | Metabolism | Transporters   | F | antiporter activity                                                      |
| 2820 | GO:0030121 | Metabolism | Transporters   | C | AP-1 adaptor complex                                                     |
| 2821 | GO:0015181 | Metabolism | Transporters   | F | arginine transmembrane transporter activity                              |
| 2822 | GO:0015173 | Metabolism | Transporters   | F | aromatic amino acid transmembrane transporter activity                   |
| 2823 | GO:1901684 | Metabolism | Transporters   | P | arsenate ion transmembrane transport                                     |
| 2824 | GO:0005471 | Metabolism | Transporters   | F | ATP:ADP antiporter activity                                              |
| 2825 | GO:0019829 | Metabolism | Transporters   | F | ATPase-coupled cation transmembrane transporter activity                 |
| 2826 | GO:0140326 | Metabolism | Transporters   | F | ATPase-coupled intramembrane lipid transporter activity                  |
| 2827 | GO:0042625 | Metabolism | Transporters   | F | ATPase-coupled ion transmembrane transporter activity                    |
| 2828 | GO:0042626 | Metabolism | Transporters   | F | ATPase-coupled transmembrane transporter activity                        |
| 2829 | GO:0008559 | Metabolism | Transporters   | F | ATPase-coupled xenobiotic transmembrane transporter activity             |
| 2830 | GO:0015174 | Metabolism | Transporters   | F | basic amino acid transmembrane transporter activity                      |
| 2831 | GO:0080139 | Metabolism | Transporters   | F | borate efflux transmembrane transporter activity                         |
| 2832 | GO:0035445 | Metabolism | Transporters   | P | borate transmembrane transport                                           |
| 2833 | GO:0046713 | Metabolism | Transporters   | P | borate transport                                                         |
| 2834 | GO:0015556 | Metabolism | Transporters   | F | C4-dicarboxylate transmembrane transporter activity                      |
| 2835 | GO:0015740 | Metabolism | Transporters   | P | C4-dicarboxylate transport                                               |
| 2836 | GO:0015839 | Metabolism | Transporters   | P | cadaverine transport                                                     |
| 2837 | GO:0015086 | Metabolism | Transporters   | F | cadmium ion transmembrane transporter activity                           |
| 2838 | GO:0015691 | Metabolism | Transporters   | P | cadmium ion transport                                                    |
| 2839 | GO:0070509 | Metabolism | Transporters   | P | calcium ion import                                                       |
| 2840 | GO:0070588 | Metabolism | Transporters   | P | calcium ion transmembrane transport                                      |

|      |            |            |              |   |                                                                       |
|------|------------|------------|--------------|---|-----------------------------------------------------------------------|
| 2841 | GO:0015085 | Metabolism | Transporters | F | calcium ion transmembrane transporter activity                        |
| 2842 | GO:0006816 | Metabolism | Transporters | P | calcium ion transport                                                 |
| 2843 | GO:0005388 | Metabolism | Transporters | F | calcium transmembrane transporter activity, phosphorylative mechanism |
| 2844 | GO:1901264 | Metabolism | Transporters | P | carbohydrate derivative transport                                     |
| 2845 | GO:0033231 | Metabolism | Transporters | P | carbohydrate export                                                   |
| 2846 | GO:0034219 | Metabolism | Transporters | P | carbohydrate transmembrane transport                                  |
| 2847 | GO:0015144 | Metabolism | Transporters | F | carbohydrate transmembrane transporter activity                       |
| 2848 | GO:0008643 | Metabolism | Transporters | P | carbohydrate transport                                                |
| 2849 | GO:0005351 | Metabolism | Transporters | F | carbohydrate:proton symporter activity                                |
| 2850 | GO:1905039 | Metabolism | Transporters | P | carboxylic acid transmembrane transport                               |
| 2851 | GO:0046943 | Metabolism | Transporters | F | carboxylic acid transmembrane transporter activity                    |
| 2852 | GO:0046942 | Metabolism | Transporters | P | carboxylic acid transport                                             |
| 2853 | GO:0015226 | Metabolism | Transporters | F | carnitine transmembrane transporter activity                          |
| 2854 | GO:0005261 | Metabolism | Transporters | F | cation channel activity                                               |
| 2855 | GO:0098655 | Metabolism | Transporters | P | cation transmembrane transport                                        |
| 2856 | GO:0008324 | Metabolism | Transporters | F | cation transmembrane transporter activity                             |
| 2857 | GO:0006812 | Metabolism | Transporters | P | cation transport                                                      |
| 2858 | GO:0015491 | Metabolism | Transporters | F | cation:cation antiporter activity                                     |
| 2859 | GO:0070727 | Metabolism | Transporters | P | cellular macromolecule localization                                   |
| 2860 | GO:0035627 | Metabolism | Transporters | P | ceramide transport                                                    |
| 2861 | GO:0015267 | Metabolism | Transporters | F | channel activity                                                      |
| 2862 | GO:0072321 | Metabolism | Transporters | P | chaperone-mediated protein transport                                  |
| 2863 | GO:0006935 | Metabolism | Transporters | P | chemotaxis                                                            |
| 2864 | GO:0034707 | Metabolism | Transporters | C | chloride channel complex                                              |
| 2865 | GO:0015108 | Metabolism | Transporters | F | chloride transmembrane transporter activity                           |
| 2866 | GO:0006821 | Metabolism | Transporters | P | chloride transport                                                    |
| 2867 | GO:0015137 | Metabolism | Transporters | F | citrate transmembrane transporter activity                            |
| 2868 | GO:0030276 | Metabolism | Transporters | F | clathrin binding                                                      |
| 2869 | GO:0030665 | Metabolism | Transporters | C | clathrin-coated vesicle membrane                                      |
| 2870 | GO:0006824 | Metabolism | Transporters | P | cobalt ion transport                                                  |
| 2871 | GO:0015228 | Metabolism | Transporters | F | coenzyme A transmembrane transporter activity                         |
| 2872 | GO:0030126 | Metabolism | Transporters | C | COP1 vesicle coat                                                     |
| 2873 | GO:0030127 | Metabolism | Transporters | C | COP2 vesicle coat                                                     |
| 2874 | GO:0030134 | Metabolism | Transporters | C | COP2-coated ER to Golgi transport vesicle                             |
| 2875 | GO:0005375 | Metabolism | Transporters | F | copper ion transmembrane transporter activity                         |
| 2876 | GO:0006825 | Metabolism | Transporters | P | copper ion transport                                                  |
| 2877 | GO:0080051 | Metabolism | Transporters | P | cutin transport                                                       |
| 2878 | GO:0031410 | Metabolism | Transporters | C | cytoplasmic vesicle                                                   |
| 2879 | GO:0005310 | Metabolism | Transporters | F | dicarboxylic acid transmembrane transporter activity                  |
| 2880 | GO:0006835 | Metabolism | Transporters | P | dicarboxylic acid transport                                           |
| 2881 | GO:0042938 | Metabolism | Transporters | P | dipeptide transport                                                   |
| 2882 | GO:0015766 | Metabolism | Transporters | P | disaccharide transport                                                |
| 2883 | GO:0072509 | Metabolism | Transporters | F | divalent inorganic cation transmembrane transporter activity          |
| 2884 | GO:0072511 | Metabolism | Transporters | P | divalent inorganic cation transport                                   |
| 2885 | GO:0070838 | Metabolism | Transporters | P | divalent metal ion transport                                          |
| 2886 | GO:0005769 | Metabolism | Transporters | C | early endosome                                                        |
| 2887 | GO:0031901 | Metabolism | Transporters | C | early endosome membrane                                               |
| 2888 | GO:0006888 | Metabolism | Transporters | P | endoplasmic reticulum to Golgi vesicle-mediated transport             |
| 2889 | GO:0005768 | Metabolism | Transporters | C | endosome                                                              |
| 2890 | GO:0010008 | Metabolism | Transporters | C | endosome membrane                                                     |
| 2891 | GO:0008333 | Metabolism | Transporters | P | endosome to lysosome transport                                        |
| 2892 | GO:0032509 | Metabolism | Transporters | P | endosome transport via multivesicular body sorting pathway            |
| 2893 | GO:1990052 | Metabolism | Transporters | P | ER to chloroplast lipid transport                                     |
| 2894 | GO:0012507 | Metabolism | Transporters | C | ER to Golgi transport vesicle membrane                                |
| 2895 | GO:0072663 | Metabolism | Transporters | P | establishment of protein localization to peroxisome                   |
| 2896 | GO:0140115 | Metabolism | Transporters | P | export across plasma membrane                                         |
| 2897 | GO:0140352 | Metabolism | Transporters | P | export from cell                                                      |
| 2898 | GO:0015230 | Metabolism | Transporters | F | FAD transmembrane transporter activity                                |
| 2899 | GO:0015245 | Metabolism | Transporters | F | fatty acid transmembrane transporter activity                         |
| 2900 | GO:0015908 | Metabolism | Transporters | P | fatty acid transport                                                  |
| 2901 | GO:0015916 | Metabolism | Transporters | P | fatty-acyl-CoA transport                                              |
| 2902 | GO:0015093 | Metabolism | Transporters | F | ferrous iron transmembrane transporter activity                       |
| 2903 | GO:0042044 | Metabolism | Transporters | P | fluid transport                                                       |
| 2904 | GO:1903424 | Metabolism | Transporters | P | fluoride transmembrane transport                                      |
| 2905 | GO:1903425 | Metabolism | Transporters | F | fluoride transmembrane transporter activity                           |
| 2906 | GO:0008517 | Metabolism | Transporters | F | folic acid transmembrane transporter activity                         |
| 2907 | GO:0015884 | Metabolism | Transporters | P | folic acid transport                                                  |
| 2908 | GO:0015755 | Metabolism | Transporters | P | fructose transmembrane transport                                      |
| 2909 | GO:0005353 | Metabolism | Transporters | F | fructose transmembrane transporter activity                           |
| 2910 | GO:0015284 | Metabolism | Transporters | F | fructose uniporter activity                                           |
| 2911 | GO:0005354 | Metabolism | Transporters | F | galactose transmembrane transporter activity                          |
| 2912 | GO:0015185 | Metabolism | Transporters | F | gamma-aminobutyric acid transmembrane transporter activity            |
| 2913 | GO:0015812 | Metabolism | Transporters | P | gamma-aminobutyric acid transport                                     |
| 2914 | GO:0015783 | Metabolism | Transporters | P | GDP-fucose transmembrane transport                                    |
| 2915 | GO:0005457 | Metabolism | Transporters | F | GDP-fucose transmembrane transporter activity                         |
| 2916 | GO:1904659 | Metabolism | Transporters | P | glucose transmembrane transport                                       |
| 2917 | GO:0005355 | Metabolism | Transporters | F | glucose transmembrane transporter activity                            |
| 2918 | GO:0015152 | Metabolism | Transporters | F | glucose-6-phosphate transmembrane transporter activity                |

|      |            |            |              |   |                                                                         |
|------|------------|------------|--------------|---|-------------------------------------------------------------------------|
| 2919 | GO:0015760 | Metabolism | Transporters | P | glucose-6-phosphate transport                                           |
| 2920 | GO:1901349 | Metabolism | Transporters | P | glucosinolate transport                                                 |
| 2921 | GO:0090448 | Metabolism | Transporters | F | glucosinolate:proton symporter activity                                 |
| 2922 | GO:0015168 | Metabolism | Transporters | F | glycerol transmembrane transporter activity                             |
| 2923 | GO:0006895 | Metabolism | Transporters | P | Golgi to endosome transport                                             |
| 2924 | GO:0006893 | Metabolism | Transporters | P | Golgi to plasma membrane transport                                      |
| 2925 | GO:0006896 | Metabolism | Transporters | P | Golgi to vacuole transport                                              |
| 2926 | GO:0017119 | Metabolism | Transporters | C | Golgi transport complex                                                 |
| 2927 | GO:0048193 | Metabolism | Transporters | P | Golgi vesicle transport                                                 |
| 2928 | GO:0015886 | Metabolism | Transporters | P | heme transport                                                          |
| 2929 | GO:0015232 | Metabolism | Transporters | F | heme transporter activity                                               |
| 2930 | GO:0051170 | Metabolism | Transporters | P | import into nucleus                                                     |
| 2931 | GO:0005452 | Metabolism | Transporters | F | inorganic anion exchanger activity                                      |
| 2932 | GO:0098661 | Metabolism | Transporters | P | inorganic anion transmembrane transport                                 |
| 2933 | GO:0015103 | Metabolism | Transporters | F | inorganic anion transmembrane transporter activity                      |
| 2934 | GO:0015698 | Metabolism | Transporters | P | inorganic anion transport                                               |
| 2935 | GO:0098662 | Metabolism | Transporters | P | inorganic cation transmembrane transport                                |
| 2936 | GO:0022890 | Metabolism | Transporters | F | inorganic cation transmembrane transporter activity                     |
| 2937 | GO:0098660 | Metabolism | Transporters | P | inorganic ion transmembrane transport                                   |
| 2938 | GO:0015318 | Metabolism | Transporters | F | inorganic molecular entity transmembrane transporter activity           |
| 2939 | GO:0005315 | Metabolism | Transporters | F | inorganic phosphate transmembrane transporter activity                  |
| 2940 | GO:0031359 | Metabolism | Transporters | C | integral component of chloroplast outer membrane                        |
| 2941 | GO:0120009 | Metabolism | Transporters | P | intermembrane lipid transfer                                            |
| 2942 | GO:0005222 | Metabolism | Transporters | F | intracellular cAMP-activated cation channel activity                    |
| 2943 | GO:0005221 | Metabolism | Transporters | F | intracellular cyclic nucleotide activated cation channel activity       |
| 2944 | GO:0065002 | Metabolism | Transporters | P | intracellular protein transmembrane transport                           |
| 2945 | GO:0006886 | Metabolism | Transporters | P | intracellular protein transport                                         |
| 2946 | GO:0046907 | Metabolism | Transporters | P | intracellular transport                                                 |
| 2947 | GO:0075733 | Metabolism | Transporters | P | intracellular transport of virus                                        |
| 2948 | GO:0006891 | Metabolism | Transporters | P | intra-Golgi vesicle-mediated transport                                  |
| 2949 | GO:0005216 | Metabolism | Transporters | F | ion channel activity                                                    |
| 2950 | GO:0034220 | Metabolism | Transporters | P | ion transmembrane transport                                             |
| 2951 | GO:0015075 | Metabolism | Transporters | F | ion transmembrane transporter activity                                  |
| 2952 | GO:0015662 | Metabolism | Transporters | F | ion transmembrane transporter activity, phosphorylative mechanism       |
| 2953 | GO:0006811 | Metabolism | Transporters | P | ion transport                                                           |
| 2954 | GO:0034755 | Metabolism | Transporters | P | iron ion transmembrane transport                                        |
| 2955 | GO:0005381 | Metabolism | Transporters | F | iron ion transmembrane transporter activity                             |
| 2956 | GO:0006826 | Metabolism | Transporters | P | iron ion transport                                                      |
| 2957 | GO:0051980 | Metabolism | Transporters | F | iron-nicotianamine transmembrane transporter activity                   |
| 2958 | GO:0005871 | Metabolism | Transporters | C | kinesin complex                                                         |
| 2959 | GO:0015180 | Metabolism | Transporters | F | L-alanine transmembrane transporter activity                            |
| 2960 | GO:0015808 | Metabolism | Transporters | P | L-alanine transport                                                     |
| 2961 | GO:1902475 | Metabolism | Transporters | P | L-alpha-amino acid transmembrane transport                              |
| 2962 | GO:0015179 | Metabolism | Transporters | F | L-amino acid transmembrane transporter activity                         |
| 2963 | GO:0045324 | Metabolism | Transporters | P | late endosome to vacuole transport                                      |
| 2964 | GO:0015184 | Metabolism | Transporters | F | L-cystine transmembrane transporter activity                            |
| 2965 | GO:0015811 | Metabolism | Transporters | P | L-cystine transport                                                     |
| 2966 | GO:0098712 | Metabolism | Transporters | P | L-glutamate import across plasma membrane                               |
| 2967 | GO:0015813 | Metabolism | Transporters | P | L-glutamate transmembrane transport                                     |
| 2968 | GO:0005313 | Metabolism | Transporters | F | L-glutamate transmembrane transporter activity                          |
| 2969 | GO:0015186 | Metabolism | Transporters | F | L-glutamine transmembrane transporter activity                          |
| 2970 | GO:0006869 | Metabolism | Transporters | P | lipid transport                                                         |
| 2971 | GO:0005319 | Metabolism | Transporters | F | lipid transporter activity                                              |
| 2972 | GO:0010351 | Metabolism | Transporters | P | lithium ion transport                                                   |
| 2973 | GO:0015189 | Metabolism | Transporters | F | L-lysine transmembrane transporter activity                             |
| 2974 | GO:0040011 | Metabolism | Transporters | P | locomotion                                                              |
| 2975 | GO:0000064 | Metabolism | Transporters | F | L-ornithine transmembrane transporter activity                          |
| 2976 | GO:0080054 | Metabolism | Transporters | F | low-affinity nitrate transmembrane transporter activity                 |
| 2977 | GO:0009673 | Metabolism | Transporters | F | low-affinity phosphate transmembrane transporter activity               |
| 2978 | GO:0015193 | Metabolism | Transporters | F | L-proline transmembrane transporter activity                            |
| 2979 | GO:0015194 | Metabolism | Transporters | F | L-serine transmembrane transporter activity                             |
| 2980 | GO:0005302 | Metabolism | Transporters | F | L-tyrosine transmembrane transporter activity                           |
| 2981 | GO:0033036 | Metabolism | Transporters | P | macromolecule localization                                              |
| 2982 | GO:0015095 | Metabolism | Transporters | F | magnesium ion transmembrane transporter activity                        |
| 2983 | GO:0015693 | Metabolism | Transporters | P | magnesium ion transport                                                 |
| 2984 | GO:0071423 | Metabolism | Transporters | P | malate transmembrane transport                                          |
| 2985 | GO:0015140 | Metabolism | Transporters | F | malate transmembrane transporter activity                               |
| 2986 | GO:0005384 | Metabolism | Transporters | F | manganese ion transmembrane transporter activity                        |
| 2987 | GO:0006828 | Metabolism | Transporters | P | manganese ion transport                                                 |
| 2988 | GO:0015410 | Metabolism | Transporters | F | manganese transmembrane transporter activity, phosphorylative mechanism |
| 2989 | GO:0046873 | Metabolism | Transporters | F | metal ion transmembrane transporter activity                            |
| 2990 | GO:0030001 | Metabolism | Transporters | P | metal ion transport                                                     |
| 2991 | GO:0015200 | Metabolism | Transporters | F | methylammonium transmembrane transporter activity                       |
| 2992 | GO:1990575 | Metabolism | Transporters | P | mitochondrial L-ornithine transmembrane transport                       |
| 2993 | GO:0006839 | Metabolism | Transporters | P | mitochondrial transport                                                 |
| 2994 | GO:0030943 | Metabolism | Transporters | F | mitochondrion targeting sequence binding                                |
| 2995 | GO:0015098 | Metabolism | Transporters | F | molybdate ion transmembrane transporter activity                        |
| 2996 | GO:0015689 | Metabolism | Transporters | P | molybdate ion transport                                                 |

|      |            |            |              |   |                                                                         |
|------|------------|------------|--------------|---|-------------------------------------------------------------------------|
| 2997 | GO:0008028 | Metabolism | Transporters | F | monocarboxylic acid transmembrane transporter activity                  |
| 2998 | GO:0015749 | Metabolism | Transporters | P | monosaccharide transmembrane transport                                  |
| 2999 | GO:0015145 | Metabolism | Transporters | F | monosaccharide transmembrane transporter activity                       |
| 3000 | GO:0015077 | Metabolism | Transporters | F | monovalent inorganic cation transmembrane transporter activity          |
| 3001 | GO:0015672 | Metabolism | Transporters | P | monovalent inorganic cation transport                                   |
| 3002 | GO:0005366 | Metabolism | Transporters | F | myo-inositol:proton symporter activity                                  |
| 3003 | GO:0010360 | Metabolism | Transporters | P | negative regulation of anion channel activity                           |
| 3004 | GO:0010362 | Metabolism | Transporters | P | negative regulation of anion channel activity by blue light             |
| 3005 | GO:1901017 | Metabolism | Transporters | P | negative regulation of potassium ion transmembrane transporter activity |
| 3006 | GO:0051051 | Metabolism | Transporters | P | negative regulation of transport                                        |
| 3007 | GO:0015175 | Metabolism | Transporters | F | neutral amino acid transmembrane transporter activity                   |
| 3008 | GO:0015804 | Metabolism | Transporters | P | neutral amino acid transport                                            |
| 3009 | GO:1902025 | Metabolism | Transporters | P | nitrate import                                                          |
| 3010 | GO:0015112 | Metabolism | Transporters | F | nitrate transmembrane transporter activity                              |
| 3011 | GO:0015706 | Metabolism | Transporters | P | nitrate transport                                                       |
| 3012 | GO:0071705 | Metabolism | Transporters | P | nitrogen compound transport                                             |
| 3013 | GO:0051168 | Metabolism | Transporters | P | nuclear export                                                          |
| 3014 | GO:0008139 | Metabolism | Transporters | F | nuclear localization sequence binding                                   |
| 3015 | GO:0005880 | Metabolism | Transporters | C | nuclear microtubule                                                     |
| 3016 | GO:0044613 | Metabolism | Transporters | C | nuclear pore central transport channel                                  |
| 3017 | GO:0051169 | Metabolism | Transporters | P | nuclear transport                                                       |
| 3018 | GO:0050657 | Metabolism | Transporters | P | nucleic acid transport                                                  |
| 3019 | GO:0006913 | Metabolism | Transporters | P | nucleocytoplasmic transport                                             |
| 3020 | GO:0005337 | Metabolism | Transporters | F | nucleoside transmembrane transporter activity                           |
| 3021 | GO:0015780 | Metabolism | Transporters | P | nucleotide-sugar transmembrane transport                                |
| 3022 | GO:0005338 | Metabolism | Transporters | F | nucleotide-sugar transmembrane transporter activity                     |
| 3023 | GO:0035673 | Metabolism | Transporters | F | oligopeptide transmembrane transporter activity                         |
| 3024 | GO:0006857 | Metabolism | Transporters | P | oligopeptide transport                                                  |
| 3025 | GO:0019755 | Metabolism | Transporters | P | one-carbon compound transport                                           |
| 3026 | GO:1903825 | Metabolism | Transporters | P | organic acid transmembrane transport                                    |
| 3027 | GO:0005342 | Metabolism | Transporters | F | organic acid transmembrane transporter activity                         |
| 3028 | GO:0015849 | Metabolism | Transporters | P | organic acid transport                                                  |
| 3029 | GO:0008514 | Metabolism | Transporters | F | organic anion transmembrane transporter activity                        |
| 3030 | GO:0015711 | Metabolism | Transporters | P | organic anion transport                                                 |
| 3031 | GO:0015850 | Metabolism | Transporters | P | organic hydroxy compound transport                                      |
| 3032 | GO:0071702 | Metabolism | Transporters | P | organic substance transport                                             |
| 3033 | GO:0015822 | Metabolism | Transporters | P | ornithine transport                                                     |
| 3034 | GO:0015131 | Metabolism | Transporters | F | oxaloacetate transmembrane transporter activity                         |
| 3035 | GO:0015729 | Metabolism | Transporters | P | oxaloacetate transport                                                  |
| 3036 | GO:0015367 | Metabolism | Transporters | F | oxoglutarate:malate antiporter activity                                 |
| 3037 | GO:1901140 | Metabolism | Transporters | P | p-coumaryl alcohol transport                                            |
| 3038 | GO:1904680 | Metabolism | Transporters | F | peptide transmembrane transporter activity                              |
| 3039 | GO:0015333 | Metabolism | Transporters | F | peptide:proton symporter activity                                       |
| 3040 | GO:1990429 | Metabolism | Transporters | C | peroxisomal importomer complex                                          |
| 3041 | GO:0010233 | Metabolism | Transporters | P | phloem transport                                                        |
| 3042 | GO:0035435 | Metabolism | Transporters | P | phosphate ion transmembrane transport                                   |
| 3043 | GO:0015114 | Metabolism | Transporters | F | phosphate ion transmembrane transporter activity                        |
| 3044 | GO:0006817 | Metabolism | Transporters | P | phosphate ion transport                                                 |
| 3045 | GO:0015714 | Metabolism | Transporters | P | phosphoenolpyruvate transport                                           |
| 3046 | GO:0015713 | Metabolism | Transporters | P | phosphoglycerate transmembrane transport                                |
| 3047 | GO:0015120 | Metabolism | Transporters | F | phosphoglycerate transmembrane transporter activity                     |
| 3048 | GO:0045332 | Metabolism | Transporters | P | phospholipid translocation                                              |
| 3049 | GO:0015914 | Metabolism | Transporters | P | phospholipid transport                                                  |
| 3050 | GO:0009506 | Metabolism | Transporters | C | plasmodesma                                                             |
| 3051 | GO:0010497 | Metabolism | Transporters | P | plasmodesmata-mediated intercellular transport                          |
| 3052 | GO:0015203 | Metabolism | Transporters | F | polyamine transmembrane transporter activity                            |
| 3053 | GO:0015846 | Metabolism | Transporters | P | polyamine transport                                                     |
| 3054 | GO:0015774 | Metabolism | Transporters | P | polysaccharide transport                                                |
| 3055 | GO:0046930 | Metabolism | Transporters | C | pore complex                                                            |
| 3056 | GO:0050918 | Metabolism | Transporters | P | positive chemotaxis                                                     |
| 3057 | GO:0031204 | Metabolism | Transporters | P | posttranslational protein targeting to membrane, translocation          |
| 3058 | GO:0071805 | Metabolism | Transporters | P | potassium ion transmembrane transport                                   |
| 3059 | GO:0015079 | Metabolism | Transporters | F | potassium ion transmembrane transporter activity                        |
| 3060 | GO:0006813 | Metabolism | Transporters | P | potassium ion transport                                                 |
| 3061 | GO:0015386 | Metabolism | Transporters | F | potassium:proton antiporter activity                                    |
| 3062 | GO:0015450 | Metabolism | Transporters | F | P-P-bond-hydrolysis-driven protein transmembrane transporter activity   |
| 3063 | GO:0015399 | Metabolism | Transporters | F | primary active transmembrane transporter activity                       |
| 3064 | GO:0015824 | Metabolism | Transporters | P | proline transport                                                       |
| 3065 | GO:0032527 | Metabolism | Transporters | P | protein exit from endoplasmic reticulum                                 |
| 3066 | GO:0006611 | Metabolism | Transporters | P | protein export from nucleus                                             |
| 3067 | GO:0045041 | Metabolism | Transporters | P | protein import into mitochondrial intermembrane space                   |
| 3068 | GO:0030150 | Metabolism | Transporters | P | protein import into mitochondrial matrix                                |
| 3069 | GO:0006606 | Metabolism | Transporters | P | protein import into nucleus                                             |
| 3070 | GO:0016560 | Metabolism | Transporters | P | protein import into peroxisome matrix, docking                          |
| 3071 | GO:0045039 | Metabolism | Transporters | P | protein insertion into mitochondrial inner membrane                     |
| 3072 | GO:0045040 | Metabolism | Transporters | P | protein insertion into mitochondrial outer membrane                     |
| 3073 | GO:0008104 | Metabolism | Transporters | P | protein localization                                                    |
| 3074 | GO:1901703 | Metabolism | Transporters | P | protein localization involved in auxin polar transport                  |

|      |            |            |              |   |                                                                            |
|------|------------|------------|--------------|---|----------------------------------------------------------------------------|
| 3075 | GO:0070973 | Metabolism | Transporters | P | protein localization to endoplasmic reticulum exit site                    |
| 3076 | GO:1903292 | Metabolism | Transporters | P | protein localization to Golgi membrane                                     |
| 3077 | GO:0035372 | Metabolism | Transporters | P | protein localization to microtubule                                        |
| 3078 | GO:1904825 | Metabolism | Transporters | P | protein localization to microtubule plus-end                               |
| 3079 | GO:0033365 | Metabolism | Transporters | P | protein localization to organelle                                          |
| 3080 | GO:0072662 | Metabolism | Transporters | P | protein localization to peroxisome                                         |
| 3081 | GO:0072659 | Metabolism | Transporters | P | protein localization to plasma membrane                                    |
| 3082 | GO:0043495 | Metabolism | Transporters | F | protein membrane anchor                                                    |
| 3083 | GO:0006627 | Metabolism | Transporters | P | protein processing involved in protein targeting to mitochondrion          |
| 3084 | GO:0009306 | Metabolism | Transporters | P | protein secretion                                                          |
| 3085 | GO:0006626 | Metabolism | Transporters | P | protein targeting to mitochondrion                                         |
| 3086 | GO:0006625 | Metabolism | Transporters | P | protein targeting to peroxisome                                            |
| 3087 | GO:0006623 | Metabolism | Transporters | P | protein targeting to vacuole                                               |
| 3088 | GO:0008320 | Metabolism | Transporters | F | protein transmembrane transporter activity                                 |
| 3089 | GO:0015031 | Metabolism | Transporters | P | protein transport                                                          |
| 3090 | GO:0043953 | Metabolism | Transporters | P | protein transport by the Tat complex                                       |
| 3091 | GO:0009977 | Metabolism | Transporters | F | proton motive force dependent protein transmembrane transporter activity   |
| 3092 | GO:0015078 | Metabolism | Transporters | F | proton transmembrane transporter activity                                  |
| 3093 | GO:0005345 | Metabolism | Transporters | F | purine nucleobase transmembrane transporter activity                       |
| 3094 | GO:0006863 | Metabolism | Transporters | P | purine nucleobase transport                                                |
| 3095 | GO:0015211 | Metabolism | Transporters | F | purine nucleoside transmembrane transporter activity                       |
| 3096 | GO:0015865 | Metabolism | Transporters | P | purine nucleotide transport                                                |
| 3097 | GO:0090481 | Metabolism | Transporters | P | pyrimidine nucleotide-sugar transmembrane transport                        |
| 3098 | GO:0015165 | Metabolism | Transporters | F | pyrimidine nucleotide-sugar transmembrane transporter activity             |
| 3099 | GO:0050833 | Metabolism | Transporters | F | pyruvate transmembrane transporter activity                                |
| 3100 | GO:0003400 | Metabolism | Transporters | P | regulation of COPII vesicle coating                                        |
| 3101 | GO:1901979 | Metabolism | Transporters | P | regulation of inward rectifier potassium channel activity                  |
| 3102 | GO:0034765 | Metabolism | Transporters | P | regulation of ion transmembrane transport                                  |
| 3103 | GO:0032412 | Metabolism | Transporters | P | regulation of ion transmembrane transporter activity                       |
| 3104 | GO:0010966 | Metabolism | Transporters | P | regulation of phosphate transport                                          |
| 3105 | GO:0042306 | Metabolism | Transporters | P | regulation of protein import into nucleus                                  |
| 3106 | GO:0010155 | Metabolism | Transporters | P | regulation of proton transport                                             |
| 3107 | GO:0022898 | Metabolism | Transporters | P | regulation of transmembrane transporter activity                           |
| 3108 | GO:0032409 | Metabolism | Transporters | P | regulation of transporter activity                                         |
| 3109 | GO:0048209 | Metabolism | Transporters | P | regulation of vesicle targeting, to, from or within Golgi                  |
| 3110 | GO:0060627 | Metabolism | Transporters | P | regulation of vesicle-mediated transport                                   |
| 3111 | GO:0050658 | Metabolism | Transporters | P | RNA transport                                                              |
| 3112 | GO:0008271 | Metabolism | Transporters | F | secondary active sulfate transmembrane transporter activity                |
| 3113 | GO:0015291 | Metabolism | Transporters | F | secondary active transmembrane transporter activity                        |
| 3114 | GO:0099503 | Metabolism | Transporters | C | secretory vesicle                                                          |
| 3115 | GO:0005484 | Metabolism | Transporters | F | SNAP receptor activity                                                     |
| 3116 | GO:0000149 | Metabolism | Transporters | F | SNARE binding                                                              |
| 3117 | GO:0031201 | Metabolism | Transporters | C | SNARE complex                                                              |
| 3118 | GO:0035493 | Metabolism | Transporters | P | SNARE complex assembly                                                     |
| 3119 | GO:0035494 | Metabolism | Transporters | P | SNARE complex disassembly                                                  |
| 3120 | GO:0098719 | Metabolism | Transporters | P | sodium ion import across plasma membrane                                   |
| 3121 | GO:0035725 | Metabolism | Transporters | P | sodium ion transmembrane transport                                         |
| 3122 | GO:0015081 | Metabolism | Transporters | F | sodium ion transmembrane transporter activity                              |
| 3123 | GO:0006814 | Metabolism | Transporters | P | sodium ion transport                                                       |
| 3124 | GO:0015385 | Metabolism | Transporters | F | sodium:proton antiporter activity                                          |
| 3125 | GO:0140323 | Metabolism | Transporters | F | solute:anion antiporter activity                                           |
| 3126 | GO:0015298 | Metabolism | Transporters | F | solute:cation antiporter activity                                          |
| 3127 | GO:0015294 | Metabolism | Transporters | F | solute:cation symporter activity                                           |
| 3128 | GO:0015299 | Metabolism | Transporters | F | solute:proton antiporter activity                                          |
| 3129 | GO:0015295 | Metabolism | Transporters | F | solute:proton symporter activity                                           |
| 3130 | GO:0006616 | Metabolism | Transporters | P | SRP-dependent cotranslational protein targeting to membrane, translocation |
| 3131 | GO:0000322 | Metabolism | Transporters | C | storage vacuole                                                            |
| 3132 | GO:0071422 | Metabolism | Transporters | P | succinate transmembrane transport                                          |
| 3133 | GO:0015141 | Metabolism | Transporters | F | succinate transmembrane transporter activity                               |
| 3134 | GO:0008515 | Metabolism | Transporters | F | sucrose transmembrane transporter activity                                 |
| 3135 | GO:0015770 | Metabolism | Transporters | P | sucrose transport                                                          |
| 3136 | GO:0008506 | Metabolism | Transporters | F | sucrose:proton symporter activity                                          |
| 3137 | GO:0051119 | Metabolism | Transporters | F | sugar transmembrane transporter activity                                   |
| 3138 | GO:0000103 | Metabolism | Transporters | P | sulfate assimilation                                                       |
| 3139 | GO:0015116 | Metabolism | Transporters | F | sulfate transmembrane transporter activity                                 |
| 3140 | GO:0008272 | Metabolism | Transporters | P | sulfate transport                                                          |
| 3141 | GO:0030581 | Metabolism | Transporters | P | symbiont intracellular protein transport in host                           |
| 3142 | GO:0015293 | Metabolism | Transporters | F | symporter activity                                                         |
| 3143 | GO:0033281 | Metabolism | Transporters | C | TAT protein transport complex                                              |
| 3144 | GO:0015117 | Metabolism | Transporters | F | thiosulfate transmembrane transporter activity                             |
| 3145 | GO:0015709 | Metabolism | Transporters | P | thiosulfate transport                                                      |
| 3146 | GO:0005802 | Metabolism | Transporters | C | trans-Golgi network                                                        |
| 3147 | GO:0012510 | Metabolism | Transporters | C | trans-Golgi network transport vesicle membrane                             |
| 3148 | GO:0046915 | Metabolism | Transporters | F | transition metal ion transmembrane transporter activity                    |
| 3149 | GO:0000041 | Metabolism | Transporters | P | transition metal ion transport                                             |
| 3150 | GO:1905011 | Metabolism | Transporters | P | transmembrane phosphate ion transport from cytosol to vacuole              |
| 3151 | GO:0055085 | Metabolism | Transporters | P | transmembrane transport                                                    |
| 3152 | GO:0022857 | Metabolism | Transporters | F | transmembrane transporter activity                                         |

|      |            |            |                      |   |                                                                                            |
|------|------------|------------|----------------------|---|--------------------------------------------------------------------------------------------|
| 3153 | GO:0006810 | Metabolism | Transporters         | P | transport                                                                                  |
| 3154 | GO:0046739 | Metabolism | Transporters         | P | transport of virus in multicellular host                                                   |
| 3155 | GO:0030133 | Metabolism | Transporters         | C | transport vesicle                                                                          |
| 3156 | GO:0030658 | Metabolism | Transporters         | C | transport vesicle membrane                                                                 |
| 3157 | GO:0005215 | Metabolism | Transporters         | F | transporter activity                                                                       |
| 3158 | GO:0030008 | Metabolism | Transporters         | C | TRAPP complex                                                                              |
| 3159 | GO:0035674 | Metabolism | Transporters         | P | tricarboxylic acid transmembrane transport                                                 |
| 3160 | GO:0015142 | Metabolism | Transporters         | F | tricarboxylic acid transmembrane transporter activity                                      |
| 3161 | GO:0071917 | Metabolism | Transporters         | F | triose-phosphate transmembrane transporter activity                                        |
| 3162 | GO:0042937 | Metabolism | Transporters         | F | tripeptide transmembrane transporter activity                                              |
| 3163 | GO:0042939 | Metabolism | Transporters         | P | tripeptide transport                                                                       |
| 3164 | GO:0072334 | Metabolism | Transporters         | P | UDP-galactose transmembrane transport                                                      |
| 3165 | GO:0005459 | Metabolism | Transporters         | F | UDP-galactose transmembrane transporter activity                                           |
| 3166 | GO:0015786 | Metabolism | Transporters         | P | UDP-glucose transmembrane transport                                                        |
| 3167 | GO:0005460 | Metabolism | Transporters         | F | UDP-glucose transmembrane transporter activity                                             |
| 3168 | GO:0015790 | Metabolism | Transporters         | P | UDP-xylose transmembrane transport                                                         |
| 3169 | GO:0005464 | Metabolism | Transporters         | F | UDP-xylose transmembrane transporter activity                                              |
| 3170 | GO:0015292 | Metabolism | Transporters         | F | uniporter activity                                                                         |
| 3171 | GO:0015210 | Metabolism | Transporters         | F | uracil transmembrane transporter activity                                                  |
| 3172 | GO:0015857 | Metabolism | Transporters         | P | uracil transport                                                                           |
| 3173 | GO:0015505 | Metabolism | Transporters         | F | uracil:cation symporter activity                                                           |
| 3174 | GO:0015204 | Metabolism | Transporters         | F | urea transmembrane transporter activity                                                    |
| 3175 | GO:0015840 | Metabolism | Transporters         | P | urea transport                                                                             |
| 3176 | GO:0043182 | Metabolism | Transporters         | P | vacuolar sequestering of sodium ion                                                        |
| 3177 | GO:0007034 | Metabolism | Transporters         | P | vacuolar transport                                                                         |
| 3178 | GO:0010232 | Metabolism | Transporters         | P | vascular transport                                                                         |
| 3179 | GO:0031982 | Metabolism | Transporters         | C | vesicle                                                                                    |
| 3180 | GO:0006904 | Metabolism | Transporters         | P | vesicle docking involved in exocytosis                                                     |
| 3181 | GO:0016050 | Metabolism | Transporters         | P | vesicle organization                                                                       |
| 3182 | GO:0016192 | Metabolism | Transporters         | P | vesicle-mediated transport                                                                 |
| 3183 | GO:0008308 | Metabolism | Transporters         | F | voltage-gated anion channel activity                                                       |
| 3184 | GO:0005245 | Metabolism | Transporters         | F | voltage-gated calcium channel activity                                                     |
| 3185 | GO:0005247 | Metabolism | Transporters         | F | voltage-gated chloride channel activity                                                    |
| 3186 | GO:0015250 | Metabolism | Transporters         | F | water channel activity                                                                     |
| 3187 | GO:0005372 | Metabolism | Transporters         | F | water transmembrane transporter activity                                                   |
| 3188 | GO:0006833 | Metabolism | Transporters         | P | water transport                                                                            |
| 3189 | GO:0042907 | Metabolism | Transporters         | F | xanthine transmembrane transporter activity                                                |
| 3190 | GO:0042906 | Metabolism | Transporters         | P | xanthine transport                                                                         |
| 3191 | GO:0042910 | Metabolism | Transporters         | F | xenobiotic transmembrane transporter activity                                              |
| 3192 | GO:0042908 | Metabolism | Transporters         | P | xenobiotic transport                                                                       |
| 3193 | GO:1990388 | Metabolism | Transporters         | P | xylem-to-phloem iron transport                                                             |
| 3194 | GO:0015341 | Metabolism | Transporters         | F | zinc efflux active transmembrane transporter activity                                      |
| 3195 | GO:0022883 | Metabolism | Transporters         | F | zinc efflux transmembrane transporter activity                                             |
| 3196 | GO:0071577 | Metabolism | Transporters         | P | zinc ion transmembrane transport                                                           |
| 3197 | GO:0005385 | Metabolism | Transporters         | F | zinc ion transmembrane transporter activity                                                |
| 3198 | GO:0006829 | Metabolism | Transporters         | P | zinc ion transport                                                                         |
| 3199 | GO:0016255 | Regulation | Protein modification | P | attachment of GPI anchor to protein                                                        |
| 3200 | GO:0051087 | Regulation | Protein modification | F | chaperone binding                                                                          |
| 3201 | GO:0061077 | Regulation | Protein modification | P | chaperone-mediated protein folding                                                         |
| 3202 | GO:0097361 | Regulation | Protein modification | C | CIA complex                                                                                |
| 3203 | GO:0043686 | Regulation | Protein modification | P | co-translational protein modification                                                      |
| 3204 | GO:0006458 | Regulation | Protein modification | P | 'de novo' protein folding                                                                  |
| 3205 | GO:0033185 | Regulation | Protein modification | C | dolichol-phosphate-mannose synthase complex                                                |
| 3206 | GO:0005783 | Regulation | Protein modification | C | endoplasmic reticulum                                                                      |
| 3207 | GO:0034663 | Regulation | Protein modification | C | endoplasmic reticulum chaperone complex                                                    |
| 3208 | GO:0070971 | Regulation | Protein modification | C | endoplasmic reticulum exit site                                                            |
| 3209 | GO:0005789 | Regulation | Protein modification | C | endoplasmic reticulum membrane                                                             |
| 3210 | GO:0030234 | Regulation | Protein modification | F | enzyme regulator activity                                                                  |
| 3211 | GO:0072546 | Regulation | Protein modification | C | ER membrane protein complex                                                                |
| 3212 | GO:0005794 | Regulation | Protein modification | C | Golgi apparatus                                                                            |
| 3213 | GO:0000139 | Regulation | Protein modification | C | Golgi membrane                                                                             |
| 3214 | GO:0030173 | Regulation | Protein modification | C | integral component of Golgi membrane                                                       |
| 3215 | GO:0018393 | Regulation | Protein modification | P | internal peptidyl-lysine acetylation                                                       |
| 3216 | GO:0006475 | Regulation | Protein modification | P | internal protein amino acid acetylation                                                    |
| 3217 | GO:0042157 | Regulation | Protein modification | P | lipoprotein metabolic process                                                              |
| 3218 | GO:0051651 | Regulation | Protein modification | P | maintenance of location in cell                                                            |
| 3219 | GO:0051457 | Regulation | Protein modification | P | maintenance of protein location in nucleus                                                 |
| 3220 | GO:0032259 | Regulation | Protein modification | P | methylation                                                                                |
| 3221 | GO:0031416 | Regulation | Protein modification | C | NatB complex                                                                               |
| 3222 | GO:0031365 | Regulation | Protein modification | P | N-terminal protein amino acid modification                                                 |
| 3223 | GO:0006499 | Regulation | Protein modification | P | N-terminal protein myristoylation                                                          |
| 3224 | GO:0008250 | Regulation | Protein modification | C | oligosaccharyltransferase complex                                                          |
| 3225 | GO:0018119 | Regulation | Protein modification | P | peptidyl-cysteine S-nitrosylation                                                          |
| 3226 | GO:0018230 | Regulation | Protein modification | P | peptidyl-L-cysteine S-palmitoylation                                                       |
| 3227 | GO:0018394 | Regulation | Protein modification | P | peptidyl-lysine acetylation                                                                |
| 3228 | GO:0003755 | Regulation | Protein modification | F | peptidyl-prolyl cis-trans isomerase activity                                               |
| 3229 | GO:0017186 | Regulation | Protein modification | P | peptidyl-pyroglutamic acid biosynthetic process, using glutaminyl-peptide cyclotransferase |

|      |            |            |                      |   |                                                              |
|------|------------|------------|----------------------|---|--------------------------------------------------------------|
| 3230 | GO:0018209 | Regulation | Protein modification | P | peptidyl-serine modification                                 |
| 3231 | GO:0035335 | Regulation | Protein modification | P | peptidyl-tyrosine dephosphorylation                          |
| 3232 | GO:0061087 | Regulation | Protein modification | P | positive regulation of histone H3-K27 methylation            |
| 3233 | GO:0033674 | Regulation | Protein modification | P | positive regulation of kinase activity                       |
| 3234 | GO:0007023 | Regulation | Protein modification | P | post-chaperonin tubulin folding pathway                      |
| 3235 | GO:0016272 | Regulation | Protein modification | C | prefoldin complex                                            |
| 3236 | GO:0008213 | Regulation | Protein modification | P | protein alkylation                                           |
| 3237 | GO:0016540 | Regulation | Protein modification | P | protein autoprocessing                                       |
| 3238 | GO:0051259 | Regulation | Protein modification | P | protein complex oligomerization                              |
| 3239 | GO:0008214 | Regulation | Protein modification | P | protein dealkylation                                         |
| 3240 | GO:0036524 | Regulation | Protein modification | F | protein deglycase activity                                   |
| 3241 | GO:0036529 | Regulation | Protein modification | P | protein deglycation, glyoxal removal                         |
| 3242 | GO:0000338 | Regulation | Protein modification | P | protein deneddylation                                        |
| 3243 | GO:0016579 | Regulation | Protein modification | P | protein deubiquitination                                     |
| 3244 | GO:0046983 | Regulation | Protein modification | F | protein dimerization activity                                |
| 3245 | GO:0003756 | Regulation | Protein modification | F | protein disulfide isomerase activity                         |
| 3246 | GO:0015035 | Regulation | Protein modification | F | protein disulfide oxidoreductase activity                    |
| 3247 | GO:0019904 | Regulation | Protein modification | F | protein domain specific binding                              |
| 3248 | GO:0018343 | Regulation | Protein modification | P | protein farnesylation                                        |
| 3249 | GO:0006457 | Regulation | Protein modification | P | protein folding                                              |
| 3250 | GO:0018344 | Regulation | Protein modification | P | protein geranylgeranylation                                  |
| 3251 | GO:0010731 | Regulation | Protein modification | P | protein glutathionylation                                    |
| 3252 | GO:0006486 | Regulation | Protein modification | P | protein glycosylation                                        |
| 3253 | GO:0046982 | Regulation | Protein modification | F | protein heterodimerization activity                          |
| 3254 | GO:0042803 | Regulation | Protein modification | F | protein homodimerization activity                            |
| 3255 | GO:0051260 | Regulation | Protein modification | P | protein homooligomerization                                  |
| 3256 | GO:0051289 | Regulation | Protein modification | P | protein homotetramerization                                  |
| 3257 | GO:1990592 | Regulation | Protein modification | P | protein K69-linked ufmylation                                |
| 3258 | GO:0005956 | Regulation | Protein modification | C | protein kinase CK2 complex                                   |
| 3259 | GO:0072657 | Regulation | Protein modification | P | protein localization to membrane                             |
| 3260 | GO:0006479 | Regulation | Protein modification | P | protein methylation                                          |
| 3261 | GO:0008276 | Regulation | Protein modification | F | protein methyltransferase activity                           |
| 3262 | GO:0032446 | Regulation | Protein modification | P | protein modification by small protein conjugation            |
| 3263 | GO:0018377 | Regulation | Protein modification | P | protein myristoylation                                       |
| 3264 | GO:0045116 | Regulation | Protein modification | P | protein neddylation                                          |
| 3265 | GO:0006487 | Regulation | Protein modification | P | protein N-linked glycosylation                               |
| 3266 | GO:0018279 | Regulation | Protein modification | P | protein N-linked glycosylation via asparagine                |
| 3267 | GO:0018258 | Regulation | Protein modification | P | protein O-linked glycosylation via hydroxyproline            |
| 3268 | GO:0018345 | Regulation | Protein modification | P | protein palmitoylation                                       |
| 3269 | GO:0000413 | Regulation | Protein modification | P | protein peptidyl-prolyl isomerization                        |
| 3270 | GO:0070212 | Regulation | Protein modification | P | protein poly-ADP-ribosylation                                |
| 3271 | GO:0018342 | Regulation | Protein modification | P | protein prenylation                                          |
| 3272 | GO:0043621 | Regulation | Protein modification | F | protein self-association                                     |
| 3273 | GO:0050821 | Regulation | Protein modification | P | protein stabilization                                        |
| 3274 | GO:0016925 | Regulation | Protein modification | P | protein sumoylation                                          |
| 3275 | GO:0031386 | Regulation | Protein modification | F | protein tag                                                  |
| 3276 | GO:0006605 | Regulation | Protein modification | P | protein targeting                                            |
| 3277 | GO:0045047 | Regulation | Protein modification | P | protein targeting to ER                                      |
| 3278 | GO:0006612 | Regulation | Protein modification | P | protein targeting to membrane                                |
| 3279 | GO:0051262 | Regulation | Protein modification | P | protein tetramerization                                      |
| 3280 | GO:0070206 | Regulation | Protein modification | P | protein trimerization                                        |
| 3281 | GO:0044877 | Regulation | Protein modification | F | protein-containing complex binding                           |
| 3282 | GO:0019707 | Regulation | Protein modification | F | protein-cysteine S-acyltransferase activity                  |
| 3283 | GO:0019706 | Regulation | Protein modification | F | protein-cysteine S-palmitoyltransferase activity             |
| 3284 | GO:0016279 | Regulation | Protein modification | F | protein-lysine N-methyltransferase activity                  |
| 3285 | GO:0050790 | Regulation | Protein modification | P | regulation of catalytic activity                             |
| 3286 | GO:0031060 | Regulation | Protein modification | F | regulation of histone methylation                            |
| 3287 | GO:0043496 | Regulation | Protein modification | P | regulation of protein homodimerization activity              |
| 3288 | GO:0051246 | Regulation | Protein modification | P | regulation of protein metabolic process                      |
| 3289 | GO:0031647 | Regulation | Protein modification | P | regulation of protein stability                              |
| 3290 | GO:0006614 | Regulation | Protein modification | P | SRP-dependent cotranslational protein targeting to membrane  |
| 3291 | GO:0043541 | Regulation | Protein modification | C | UDP-N-acetylglucosamine transferase complex                  |
| 3292 | GO:0072341 | Regulation | Protein modification | F | modified amino acid binding                                  |
| 3293 | GO:0032272 | Regulation | Protein modification | P | negative regulation of protein polymerization                |
| 3294 | GO:0031333 | Regulation | Protein modification | P | negative regulation of protein-containing complex assembly   |
| 3295 | GO:0004596 | Regulation | Protein modification | F | peptide alpha-N-acetyltransferase activity                   |
| 3296 | GO:0018316 | Regulation | Protein modification | P | peptide cross-linking via L-cystine                          |
| 3297 | GO:0042586 | Regulation | Protein modification | F | peptide deformylase activity                                 |
| 3298 | GO:0033743 | Regulation | Protein modification | F | peptide-methionine (R)-S-oxide reductase activity            |
| 3299 | GO:0008113 | Regulation | Protein modification | F | peptide-methionine (S)-S-oxide reductase activity            |
| 3300 | GO:0018193 | Regulation | Protein modification | P | peptidyl-amino acid modification                             |
| 3301 | GO:0018205 | Regulation | Protein modification | P | peptidyl-lysine modification                                 |
| 3302 | GO:0031401 | Regulation | Protein modification | P | positive regulation of protein modification process          |
| 3303 | GO:0070647 | Regulation | Protein modification | P | protein modification by small protein conjugation or removal |
| 3304 | GO:0070646 | Regulation | Protein modification | P | protein modification by small protein removal                |
| 3305 | GO:0036211 | Regulation | Protein modification | P | protein modification process                                 |
| 3306 | GO:0065003 | Regulation | Protein modification | P | protein-containing complex assembly                          |
| 3307 | GO:0031503 | Regulation | Protein modification | P | protein-containing complex localization                      |



|      |            |            |                      |   |                                                                         |
|------|------------|------------|----------------------|---|-------------------------------------------------------------------------|
| 3308 | GO:0043933 | Regulation | Protein modification | P | protein-containing complex subunit organization                         |
| 3309 | GO:0031399 | Regulation | Protein modification | P | regulation of protein modification process                              |
| 3310 | GO:0065007 | Regulation | Regulation           | P | biological regulation                                                   |
| 3311 | GO:0098772 | Regulation | Regulation           | F | molecular function regulator                                            |
| 3312 | GO:0030835 | Regulation | Regulation           | P | negative regulation of actin filament depolymerization                  |
| 3313 | GO:0030837 | Regulation | Regulation           | P | negative regulation of actin filament polymerization                    |
| 3314 | GO:0048519 | Regulation | Regulation           | P | negative regulation of biological process                               |
| 3315 | GO:0009890 | Regulation | Regulation           | P | negative regulation of biosynthetic process                             |
| 3316 | GO:0043086 | Regulation | Regulation           | P | negative regulation of catalytic activity                               |
| 3317 | GO:0045596 | Regulation | Regulation           | P | negative regulation of cell differentiation                             |
| 3318 | GO:0030308 | Regulation | Regulation           | P | negative regulation of cell growth                                      |
| 3319 | GO:0031327 | Regulation | Regulation           | P | negative regulation of cellular biosynthetic process                    |
| 3320 | GO:2000113 | Regulation | Regulation           | P | negative regulation of cellular macromolecule biosynthetic process      |
| 3321 | GO:0031324 | Regulation | Regulation           | P | negative regulation of cellular metabolic process                       |
| 3322 | GO:0048523 | Regulation | Regulation           | P | negative regulation of cellular process                                 |
| 3323 | GO:1900060 | Regulation | Regulation           | P | negative regulation of ceramide biosynthetic process                    |
| 3324 | GO:0051494 | Regulation | Regulation           | P | negative regulation of cytoskeleton organization                        |
| 3325 | GO:0051053 | Regulation | Regulation           | P | negative regulation of DNA metabolic process                            |
| 3326 | GO:1901918 | Regulation | Regulation           | P | negative regulation of exoribonuclease activity                         |
| 3327 | GO:0009910 | Regulation | Regulation           | P | negative regulation of flower development                               |
| 3328 | GO:0045926 | Regulation | Regulation           | P | negative regulation of growth                                           |
| 3329 | GO:1901332 | Regulation | Regulation           | P | negative regulation of lateral root development                         |
| 3330 | GO:0010558 | Regulation | Regulation           | P | negative regulation of macromolecule biosynthetic process               |
| 3331 | GO:0010605 | Regulation | Regulation           | P | negative regulation of macromolecule metabolic process                  |
| 3332 | GO:0009892 | Regulation | Regulation           | P | negative regulation of metabolic process                                |
| 3333 | GO:0007026 | Regulation | Regulation           | P | negative regulation of microtubule depolymerization                     |
| 3334 | GO:0031115 | Regulation | Regulation           | P | negative regulation of microtubule polymerization                       |
| 3335 | GO:0051172 | Regulation | Regulation           | P | negative regulation of nitrogen compound metabolic process              |
| 3336 | GO:0045934 | Regulation | Regulation           | P | negative regulation of nucleobase-containing compound metabolic process |
| 3337 | GO:0035308 | Regulation | Regulation           | P | negative regulation of protein dephosphorylation                        |
| 3338 | GO:2000604 | Regulation | Regulation           | P | negative regulation of secondary growth                                 |
| 3339 | GO:1902184 | Regulation | Regulation           | P | negative regulation of shoot apical meristem development                |
| 3340 | GO:2000122 | Regulation | Regulation           | P | negative regulation of stomatal complex development                     |
| 3341 | GO:1902904 | Regulation | Regulation           | P | negative regulation of supramolecular fiber organization                |
| 3342 | GO:0032211 | Regulation | Regulation           | P | negative regulation of telomere maintenance via telomerase              |
| 3343 | GO:0051511 | Regulation | Regulation           | P | negative regulation of unidimensional cell growth                       |
| 3344 | GO:1904277 | Regulation | Regulation           | P | negative regulation of wax biosynthetic process                         |
| 3345 | GO:0030836 | Regulation | Regulation           | P | positive regulation of actin filament depolymerization                  |
| 3346 | GO:0048518 | Regulation | Regulation           | P | positive regulation of biological process                               |
| 3347 | GO:0009891 | Regulation | Regulation           | P | positive regulation of biosynthetic process                             |
| 3348 | GO:1904143 | Regulation | Regulation           | P | positive regulation of carotenoid biosynthetic process                  |
| 3349 | GO:0045597 | Regulation | Regulation           | P | positive regulation of cell differentiation                             |
| 3350 | GO:0031328 | Regulation | Regulation           | P | positive regulation of cellular biosynthetic process                    |
| 3351 | GO:0031325 | Regulation | Regulation           | P | positive regulation of cellular metabolic process                       |
| 3352 | GO:0048522 | Regulation | Regulation           | P | positive regulation of cellular process                                 |
| 3353 | GO:0032270 | Regulation | Regulation           | P | positive regulation of cellular protein metabolic process               |
| 3354 | GO:1901959 | Regulation | Regulation           | P | positive regulation of cutin biosynthetic process                       |
| 3355 | GO:0045962 | Regulation | Regulation           | P | positive regulation of development, heterochronic                       |
| 3356 | GO:0048639 | Regulation | Regulation           | P | positive regulation of developmental growth                             |
| 3357 | GO:0040019 | Regulation | Regulation           | P | positive regulation of embryonic development                            |
| 3358 | GO:0009911 | Regulation | Regulation           | P | positive regulation of flower development                               |
| 3359 | GO:0080114 | Regulation | Regulation           | P | positive regulation of glycine hydroxymethyltransferase activity        |
| 3360 | GO:0045927 | Regulation | Regulation           | P | positive regulation of growth                                           |
| 3361 | GO:1901333 | Regulation | Regulation           | P | positive regulation of lateral root development                         |
| 3362 | GO:0010557 | Regulation | Regulation           | P | positive regulation of macromolecule biosynthetic process               |
| 3363 | GO:0010604 | Regulation | Regulation           | P | positive regulation of macromolecule metabolic process                  |
| 3364 | GO:0009893 | Regulation | Regulation           | P | positive regulation of metabolic process                                |
| 3365 | GO:0031117 | Regulation | Regulation           | P | positive regulation of microtubule depolymerization                     |
| 3366 | GO:0031116 | Regulation | Regulation           | P | positive regulation of microtubule polymerization                       |
| 3367 | GO:0051173 | Regulation | Regulation           | P | positive regulation of nitrogen compound metabolic process              |
| 3368 | GO:0045935 | Regulation | Regulation           | P | positive regulation of nucleobase-containing compound metabolic process |
| 3369 | GO:0046622 | Regulation | Regulation           | P | positive regulation of organ growth                                     |
| 3370 | GO:1903288 | Regulation | Regulation           | P | positive regulation of potassium ion import across plasma membrane      |
| 3371 | GO:0031334 | Regulation | Regulation           | P | positive regulation of protein complex assembly                         |
| 3372 | GO:0070863 | Regulation | Regulation           | P | positive regulation of protein exit from endoplasmic reticulum          |
| 3373 | GO:0051247 | Regulation | Regulation           | P | positive regulation of protein metabolic process                        |
| 3374 | GO:0010030 | Regulation | Regulation           | P | positive regulation of seed germination                                 |
| 3375 | GO:1902458 | Regulation | Regulation           | P | positive regulation of stomatal opening                                 |
| 3376 | GO:0010063 | Regulation | Regulation           | P | positive regulation of trichoblast fate specification                   |
| 3377 | GO:0051512 | Regulation | Regulation           | P | positive regulation of unidimensional cell growth                       |
| 3378 | GO:1905182 | Regulation | Regulation           | P | positive regulation of urease activity                                  |
| 3379 | GO:1904278 | Regulation | Regulation           | P | positive regulation of wax biosynthetic process                         |
| 3380 | GO:0032956 | Regulation | Regulation           | P | regulation of actin cytoskeleton organization                           |
| 3381 | GO:0032970 | Regulation | Regulation           | P | regulation of actin filament-based process                              |
| 3382 | GO:2000011 | Regulation | Regulation           | P | regulation of adaxial/abaxial pattern formation                         |
| 3383 | GO:0031537 | Regulation | Regulation           | P | regulation of anthocyanin metabolic process                             |
| 3384 | GO:0050789 | Regulation | Regulation           | P | regulation of biological process                                        |
| 3385 | GO:0065008 | Regulation | Regulation           | P | regulation of biological quality                                        |

|      |            |            |               |   |                                                                                   |
|------|------------|------------|---------------|---|-----------------------------------------------------------------------------------|
| 3386 | GO:0009889 | Regulation | Regulation    | P | regulation of biosynthetic process                                                |
| 3387 | GO:0030155 | Regulation | Regulation    | P | regulation of cell adhesion                                                       |
| 3388 | GO:0001558 | Regulation | Regulation    | P | regulation of cell growth                                                         |
| 3389 | GO:0001560 | Regulation | Regulation    | P | regulation of cell growth by extracellular stimulus                               |
| 3390 | GO:0010769 | Regulation | Regulation    | P | regulation of cell morphogenesis involved in differentiation                      |
| 3391 | GO:0008360 | Regulation | Regulation    | P | regulation of cell shape                                                          |
| 3392 | GO:1903338 | Regulation | Regulation    | P | regulation of cell wall organization or biogenesis                                |
| 3393 | GO:0034248 | Regulation | Regulation    | P | regulation of cellular amide metabolic process                                    |
| 3394 | GO:0031326 | Regulation | Regulation    | P | regulation of cellular biosynthetic process                                       |
| 3395 | GO:0051128 | Regulation | Regulation    | F | regulation of cellular component organization                                     |
| 3396 | GO:0010565 | Regulation | Regulation    | P | regulation of cellular ketone metabolic process                                   |
| 3397 | GO:2000112 | Regulation | Regulation    | P | regulation of cellular macromolecule biosynthetic process                         |
| 3398 | GO:0031323 | Regulation | Regulation    | P | regulation of cellular metabolic process                                          |
| 3399 | GO:0050794 | Regulation | Regulation    | P | regulation of cellular process                                                    |
| 3400 | GO:0032268 | Regulation | Regulation    | P | regulation of cellular protein metabolic process                                  |
| 3401 | GO:1901957 | Regulation | Regulation    | P | regulation of cutin biosynthetic process                                          |
| 3402 | GO:0035303 | Regulation | Regulation    | P | regulation of dephosphorylation                                                   |
| 3403 | GO:0040034 | Regulation | Regulation    | P | regulation of development, heterochronic                                          |
| 3404 | GO:0045995 | Regulation | Regulation    | P | regulation of embryonic development                                               |
| 3405 | GO:0045604 | Regulation | Regulation    | P | regulation of epidermal cell differentiation                                      |
| 3406 | GO:2000769 | Regulation | Regulation    | P | regulation of establishment or maintenance of cell polarity regulating cell shape |
| 3407 | GO:0017157 | Regulation | Regulation    | P | regulation of exocytosis                                                          |
| 3408 | GO:0010080 | Regulation | Regulation    | P | regulation of floral meristem growth                                              |
| 3409 | GO:0009909 | Regulation | Regulation    | P | regulation of flower development                                                  |
| 3410 | GO:0010439 | Regulation | Regulation    | P | regulation of glucosinolate biosynthetic process                                  |
| 3411 | GO:0040008 | Regulation | Regulation    | P | regulation of growth                                                              |
| 3412 | GO:0010081 | Regulation | Regulation    | P | regulation of inflorescence meristem growth                                       |
| 3413 | GO:2000023 | Regulation | Regulation    | P | regulation of lateral root development                                            |
| 3414 | GO:2000024 | Regulation | Regulation    | P | regulation of leaf development                                                    |
| 3415 | GO:2000025 | Regulation | Regulation    | P | regulation of leaf formation                                                      |
| 3416 | GO:1901371 | Regulation | Regulation    | P | regulation of leaf morphogenesis                                                  |
| 3417 | GO:1901141 | Regulation | Regulation    | P | regulation of lignin biosynthetic process                                         |
| 3418 | GO:0010556 | Regulation | Regulation    | P | regulation of macromolecule biosynthetic process                                  |
| 3419 | GO:0060255 | Regulation | Regulation    | P | regulation of macromolecule metabolic process                                     |
| 3420 | GO:1905038 | Regulation | Regulation    | P | regulation of membrane lipid metabolic process                                    |
| 3421 | GO:0048509 | Regulation | Regulation    | P | regulation of meristem development                                                |
| 3422 | GO:0010075 | Regulation | Regulation    | P | regulation of meristem growth                                                     |
| 3423 | GO:0009934 | Regulation | Regulation    | P | regulation of meristem structural organization                                    |
| 3424 | GO:0019222 | Regulation | Regulation    | P | regulation of metabolic process                                                   |
| 3425 | GO:0070507 | Regulation | Regulation    | P | regulation of microtubule cytoskeleton organization                               |
| 3426 | GO:0031110 | Regulation | Regulation    | P | regulation of microtubule polymerization or depolymerization                      |
| 3427 | GO:0032886 | Regulation | Regulation    | P | regulation of microtubule-based process                                           |
| 3428 | GO:0065009 | Regulation | Regulation    | P | regulation of molecular function                                                  |
| 3429 | GO:0040014 | Regulation | Regulation    | P | regulation of multicellular organism growth                                       |
| 3430 | GO:2000026 | Regulation | Regulation    | P | regulation of multicellular organismal development                                |
| 3431 | GO:0061062 | Regulation | Regulation    | P | regulation of nematode larval development                                         |
| 3432 | GO:0051171 | Regulation | Regulation    | P | regulation of nitrogen compound metabolic process                                 |
| 3433 | GO:0006808 | Regulation | Regulation    | P | regulation of nitrogen utilization                                                |
| 3434 | GO:0019219 | Regulation | Regulation    | P | regulation of nucleobase-containing compound metabolic process                    |
| 3435 | GO:0033043 | Regulation | Regulation    | P | regulation of organelle organization                                              |
| 3436 | GO:1900030 | Regulation | Regulation    | P | regulation of pectin biosynthetic process                                         |
| 3437 | GO:0019220 | Regulation | Regulation    | P | regulation of phosphate metabolic process                                         |
| 3438 | GO:0051174 | Regulation | Regulation    | P | regulation of phosphorus metabolic process                                        |
| 3439 | GO:1905421 | Regulation | Regulation    | P | regulation of plant organ morphogenesis                                           |
| 3440 | GO:2001009 | Regulation | Regulation    | P | regulation of plant-type cell wall cellulose biosynthetic process                 |
| 3441 | GO:0080092 | Regulation | Regulation    | P | regulation of pollen tube growth                                                  |
| 3442 | GO:0048580 | Regulation | Regulation    | P | regulation of post-embryonic development                                          |
| 3443 | GO:2000069 | Regulation | Regulation    | P | regulation of post-embryonic root development                                     |
| 3444 | GO:0080090 | Regulation | Regulation    | P | regulation of primary metabolic process                                           |
| 3445 | GO:2000214 | Regulation | Regulation    | P | regulation of proline metabolic process                                           |
| 3446 | GO:0010082 | Regulation | Regulation    | P | regulation of root meristem growth                                                |
| 3447 | GO:0010337 | Regulation | Regulation    | P | regulation of salicylic acid metabolic process                                    |
| 3448 | GO:2000652 | Regulation | Regulation    | P | regulation of secondary cell wall biogenesis                                      |
| 3449 | GO:1900376 | Regulation | Regulation    | P | regulation of secondary metabolite biosynthetic process                           |
| 3450 | GO:2000032 | Regulation | Regulation    | P | regulation of secondary shoot formation                                           |
| 3451 | GO:0080050 | Regulation | Regulation    | P | regulation of seed development                                                    |
| 3452 | GO:0080113 | Regulation | Regulation    | P | regulation of seed growth                                                         |
| 3453 | GO:1900140 | Regulation | Regulation    | P | regulation of seedling development                                                |
| 3454 | GO:1902183 | Regulation | Regulation    | P | regulation of shoot apical meristem development                                   |
| 3455 | GO:0048831 | Regulation | Regulation    | P | regulation of shoot system development                                            |
| 3456 | GO:0062012 | Regulation | Regulation    | P | regulation of small molecule metabolic process                                    |
| 3457 | GO:0090153 | Regulation | Regulation    | P | regulation of sphingolipid biosynthetic process                                   |
| 3458 | GO:2000038 | Regulation | Regulation    | P | regulation of stomatal complex development                                        |
| 3459 | GO:2000037 | Regulation | Regulation    | P | regulation of stomatal complex patterning                                         |
| 3460 | GO:1901401 | Regulation | Regulation    | P | regulation of tetrapyrrole metabolic process                                      |
| 3461 | GO:0051338 | Regulation | Regulation    | P | regulation of transferase activity                                                |
| 3462 | GO:0051510 | Regulation | Regulation    | P | regulation of unidimensional cell growth                                          |
| 3463 | GO:0043138 | Regulation | Transcription | F | 3'-5' DNA helicase activity                                                       |

|      |            |            |               |   |                                                                          |
|------|------------|------------|---------------|---|--------------------------------------------------------------------------|
| 3464 | GO:0034062 | Regulation | Transcription | F | 5'-3' RNA polymerase activity                                            |
| 3465 | GO:0006370 | Regulation | Transcription | P | 7-methylguanosine mRNA capping                                           |
| 3466 | GO:0033613 | Regulation | Transcription | F | activating transcription factor binding                                  |
| 3467 | GO:0003680 | Regulation | Transcription | F | AT DNA binding                                                           |
| 3468 | GO:0043044 | Regulation | Transcription | P | ATP-dependent chromatin remodeling                                       |
| 3469 | GO:0045014 | Regulation | Transcription | P | carbon catabolite repression of transcription by glucose                 |
| 3470 | GO:0016593 | Regulation | Transcription | C | Cdc73/Paf1 complex                                                       |
| 3471 | GO:0031490 | Regulation | Transcription | F | chromatin DNA binding                                                    |
| 3472 | GO:0097549 | Regulation | Transcription | P | chromatin organization involved in negative regulation of transcription  |
| 3473 | GO:0034401 | Regulation | Transcription | P | chromatin organization involved in regulation of transcription           |
| 3474 | GO:0006338 | Regulation | Transcription | P | chromatin remodeling                                                     |
| 3475 | GO:0006342 | Regulation | Transcription | P | chromatin silencing                                                      |
| 3476 | GO:0030702 | Regulation | Transcription | P | chromatin silencing at centromere                                        |
| 3477 | GO:0031048 | Regulation | Transcription | P | chromatin silencing by small RNA                                         |
| 3478 | GO:0070847 | Regulation | Transcription | C | core mediator complex                                                    |
| 3479 | GO:0016569 | Regulation | Transcription | P | covalent chromatin modification                                          |
| 3480 | GO:0070988 | Regulation | Transcription | P | demethylation                                                            |
| 3481 | GO:0070940 | Regulation | Transcription | P | dephosphorylation of RNA polymerase II C-terminal domain                 |
| 3482 | GO:0071103 | Regulation | Transcription | P | DNA conformation change                                                  |
| 3483 | GO:0032392 | Regulation | Transcription | P | DNA geometric change                                                     |
| 3484 | GO:0006306 | Regulation | Transcription | P | DNA methylation                                                          |
| 3485 | GO:0006304 | Regulation | Transcription | P | DNA modification                                                         |
| 3486 | GO:0001216 | Regulation | Transcription | F | DNA-binding transcription activator activity                             |
| 3487 | GO:0001228 | Regulation | Transcription | F | DNA-binding transcription activator activity, RNA polymerase II-specific |
| 3488 | GO:0003700 | Regulation | Transcription | F | DNA-binding transcription factor activity                                |
| 3489 | GO:0000981 | Regulation | Transcription | F | DNA-binding transcription factor activity, RNA polymerase II-specific    |
| 3490 | GO:0003899 | Regulation | Transcription | F | DNA-directed 5'-3' RNA polymerase activity                               |
| 3491 | GO:0000428 | Regulation | Transcription | C | DNA-directed RNA polymerase complex                                      |
| 3492 | GO:0006354 | Regulation | Transcription | P | DNA-templated transcription, elongation                                  |
| 3493 | GO:0006352 | Regulation | Transcription | P | DNA-templated transcription, initiation                                  |
| 3494 | GO:0006353 | Regulation | Transcription | P | DNA-templated transcription, termination                                 |
| 3495 | GO:0032044 | Regulation | Transcription | C | DSIF complex                                                             |
| 3496 | GO:0031050 | Regulation | Transcription | P | dsRNA processing                                                         |
| 3497 | GO:0000408 | Regulation | Transcription | C | EKC/KEOPS complex                                                        |
| 3498 | GO:0032783 | Regulation | Transcription | C | ELL-EAF complex                                                          |
| 3499 | GO:0033588 | Regulation | Transcription | C | Elongator holoenzyme complex                                             |
| 3500 | GO:0070449 | Regulation | Transcription | C | elongin complex                                                          |
| 3501 | GO:0001158 | Regulation | Transcription | F | enhancer sequence-specific DNA binding                                   |
| 3502 | GO:0010467 | Regulation | Transcription | P | gene expression                                                          |
| 3503 | GO:0016458 | Regulation | Transcription | P | gene silencing                                                           |
| 3504 | GO:0035195 | Regulation | Transcription | P | gene silencing by miRNA                                                  |
| 3505 | GO:0031047 | Regulation | Transcription | P | gene silencing by RNA                                                    |
| 3506 | GO:0004818 | Regulation | Transcription | F | glutamate-tRNA ligase activity                                           |
| 3507 | GO:0008883 | Regulation | Transcription | F | glutamyl-tRNA reductase activity                                         |
| 3508 | GO:1902562 | Regulation | Transcription | C | H4 histone acetyltransferase complex                                     |
| 3509 | GO:0043189 | Regulation | Transcription | C | H4/H2A histone acetyltransferase complex                                 |
| 3510 | GO:0004386 | Regulation | Transcription | F | helicase activity                                                        |
| 3511 | GO:0016573 | Regulation | Transcription | P | histone acetylation                                                      |
| 3512 | GO:0004402 | Regulation | Transcription | F | histone acetyltransferase activity                                       |
| 3513 | GO:0043995 | Regulation | Transcription | F | histone acetyltransferase activity (H4-K5 specific)                      |
| 3514 | GO:0035035 | Regulation | Transcription | F | histone acetyltransferase binding                                        |
| 3515 | GO:0000123 | Regulation | Transcription | C | histone acetyltransferase complex                                        |
| 3516 | GO:0034969 | Regulation | Transcription | P | histone arginine methylation                                             |
| 3517 | GO:0042393 | Regulation | Transcription | F | histone binding                                                          |
| 3518 | GO:0004407 | Regulation | Transcription | F | histone deacetylase activity                                             |
| 3519 | GO:0000118 | Regulation | Transcription | C | histone deacetylase complex                                              |
| 3520 | GO:0032452 | Regulation | Transcription | F | histone demethylase activity                                             |
| 3521 | GO:0032453 | Regulation | Transcription | F | histone demethylase activity (H3-K4 specific)                            |
| 3522 | GO:0032454 | Regulation | Transcription | F | histone demethylase activity (H3-K9 specific)                            |
| 3523 | GO:0034647 | Regulation | Transcription | F | histone demethylase activity (H3-trimethyl-K4 specific)                  |
| 3524 | GO:0016577 | Regulation | Transcription | P | histone demethylation                                                    |
| 3525 | GO:1990258 | Regulation | Transcription | P | histone glutamine methylation                                            |
| 3526 | GO:1990164 | Regulation | Transcription | P | histone H2A phosphorylation                                              |
| 3527 | GO:0033523 | Regulation | Transcription | P | histone H2B ubiquitination                                               |
| 3528 | GO:0070932 | Regulation | Transcription | P | histone H3 deacetylation                                                 |
| 3529 | GO:0070734 | Regulation | Transcription | P | histone H3-K27 methylation                                               |
| 3530 | GO:0070544 | Regulation | Transcription | P | histone H3-K36 demethylation                                             |
| 3531 | GO:0010452 | Regulation | Transcription | P | histone H3-K36 methylation                                               |
| 3532 | GO:0034720 | Regulation | Transcription | P | histone H3-K4 demethylation                                              |
| 3533 | GO:0051568 | Regulation | Transcription | P | histone H3-K4 methylation                                                |
| 3534 | GO:0043970 | Regulation | Transcription | P | histone H3-K9 acetylation                                                |
| 3535 | GO:1990619 | Regulation | Transcription | P | histone H3-K9 deacetylation                                              |
| 3536 | GO:0033169 | Regulation | Transcription | P | histone H3-K9 demethylation                                              |
| 3537 | GO:0051567 | Regulation | Transcription | P | histone H3-K9 methylation                                                |
| 3538 | GO:0035407 | Regulation | Transcription | P | histone H3-T11 phosphorylation                                           |
| 3539 | GO:0072355 | Regulation | Transcription | P | histone H3-T3 phosphorylation                                            |
| 3540 | GO:0070933 | Regulation | Transcription | P | histone H4 deacetylation                                                 |
| 3541 | GO:0043985 | Regulation | Transcription | P | histone H4-R3 methylation                                                |

|      |            |            |               |   |                                                                            |
|------|------------|------------|---------------|---|----------------------------------------------------------------------------|
| 3542 | GO:0035175 | Regulation | Transcription | F | histone kinase activity (H3-S10 specific)                                  |
| 3543 | GO:0035402 | Regulation | Transcription | F | histone kinase activity (H3-T11 specific)                                  |
| 3544 | GO:0072354 | Regulation | Transcription | F | histone kinase activity (H3-T3 specific)                                   |
| 3545 | GO:0070076 | Regulation | Transcription | P | histone lysine demethylation                                               |
| 3546 | GO:0034968 | Regulation | Transcription | P | histone lysine methylation                                                 |
| 3547 | GO:0016571 | Regulation | Transcription | P | histone methylation                                                        |
| 3548 | GO:0042054 | Regulation | Transcription | F | histone methyltransferase activity                                         |
| 3549 | GO:0046976 | Regulation | Transcription | F | histone methyltransferase activity (H3-K27 specific)                       |
| 3550 | GO:0046975 | Regulation | Transcription | F | histone methyltransferase activity (H3-K36 specific)                       |
| 3551 | GO:0035097 | Regulation | Transcription | C | histone methyltransferase complex                                          |
| 3552 | GO:0016570 | Regulation | Transcription | P | histone modification                                                       |
| 3553 | GO:0010390 | Regulation | Transcription | P | histone monoubiquitination                                                 |
| 3554 | GO:0016572 | Regulation | Transcription | P | histone phosphorylation                                                    |
| 3555 | GO:0035174 | Regulation | Transcription | F | histone serine kinase activity                                             |
| 3556 | GO:0008469 | Regulation | Transcription | F | histone-arginine N-methyltransferase activity                              |
| 3557 | GO:1990259 | Regulation | Transcription | F | histone-glutamine methyltransferase activity                               |
| 3558 | GO:0018024 | Regulation | Transcription | F | histone-lysine N-methyltransferase activity                                |
| 3559 | GO:0031011 | Regulation | Transcription | C | Ino80 complex                                                              |
| 3560 | GO:0097346 | Regulation | Transcription | C | INO80-type complex                                                         |
| 3561 | GO:0098732 | Regulation | Transcription | P | macromolecule deacylation                                                  |
| 3562 | GO:0043414 | Regulation | Transcription | P | macromolecule methylation                                                  |
| 3563 | GO:0043412 | Regulation | Transcription | P | macromolecule modification                                                 |
| 3564 | GO:0006344 | Regulation | Transcription | P | maintenance of chromatin silencing                                         |
| 3565 | GO:0010216 | Regulation | Transcription | P | maintenance of DNA methylation                                             |
| 3566 | GO:0043570 | Regulation | Transcription | P | maintenance of DNA repeat elements                                         |
|      |            |            |               |   | maintenance of transcriptional fidelity during DNA-templated transcription |
| 3567 | GO:0001193 | Regulation | Transcription | P | elongation from RNA polymerase II promoter                                 |
| 3568 | GO:0016592 | Regulation | Transcription | C | mediator complex                                                           |
| 3569 | GO:0035064 | Regulation | Transcription | F | methylated histone binding                                                 |
| 3570 | GO:0140034 | Regulation | Transcription | F | methylation-dependent protein binding                                      |
| 3571 | GO:0034708 | Regulation | Transcription | C | methyltransferase complex                                                  |
| 3572 | GO:0048027 | Regulation | Transcription | F | mRNA 5'-UTR binding                                                        |
| 3573 | GO:0006378 | Regulation | Transcription | P | mRNA polyadenylation                                                       |
| 3574 | GO:0006397 | Regulation | Transcription | P | mRNA processing                                                            |
| 3575 | GO:0032041 | Regulation | Transcription | F | NAD-dependent histone deacetylase activity (H3-K14 specific)               |
| 3576 | GO:0043433 | Regulation | Transcription | P | negative regulation of DNA-binding transcription factor activity           |
| 3577 | GO:2000143 | Regulation | Transcription | P | negative regulation of DNA-templated transcription, initiation             |
| 3578 | GO:0010629 | Regulation | Transcription | P | negative regulation of gene expression                                     |
| 3579 | GO:0045814 | Regulation | Transcription | P | negative regulation of gene expression, epigenetic                         |
| 3580 | GO:0035067 | Regulation | Transcription | P | negative regulation of histone acetylation                                 |
| 3581 | GO:1900364 | Regulation | Transcription | P | negative regulation of mRNA polyadenylation                                |
| 3582 | GO:1903507 | Regulation | Transcription | P | negative regulation of nucleic acid-templated transcription                |
| 3583 | GO:1902679 | Regulation | Transcription | P | negative regulation of RNA biosynthetic process                            |
| 3584 | GO:1900369 | Regulation | Transcription | P | negative regulation of RNA interference                                    |
| 3585 | GO:0000122 | Regulation | Transcription | P | negative regulation of transcription by RNA polymerase II                  |
| 3586 | GO:0045892 | Regulation | Transcription | P | negative regulation of transcription, DNA-templated                        |
| 3587 | GO:0010529 | Regulation | Transcription | P | negative regulation of transposition                                       |
| 3588 | GO:0035267 | Regulation | Transcription | C | NuA4 histone acetyltransferase complex                                     |
| 3589 | GO:0055029 | Regulation | Transcription | C | nuclear DNA-directed RNA polymerase complex                                |
| 3590 | GO:0071048 | Regulation | Transcription | P | nuclear retention of unspliced pre-mRNA at the site of transcription       |
| 3591 | GO:0031380 | Regulation | Transcription | C | nuclear RNA-directed RNA polymerase complex                                |
| 3592 | GO:0016607 | Regulation | Transcription | C | nuclear speck                                                              |
| 3593 | GO:0000289 | Regulation | Transcription | P | nuclear-transcribed mRNA poly(A) tail shortening                           |
| 3594 | GO:0097659 | Regulation | Transcription | P | nucleic acid-templated transcription                                       |
| 3595 | GO:0005730 | Regulation | Transcription | C | nucleolus                                                                  |
| 3596 | GO:0034728 | Regulation | Transcription | P | nucleosome organization                                                    |
| 3597 | GO:0000932 | Regulation | Transcription | C | P-body                                                                     |
| 3598 | GO:0035246 | Regulation | Transcription | P | peptidyl-arginine N-methylation                                            |
| 3599 | GO:0018027 | Regulation | Transcription | P | peptidyl-lysine dimethylation                                              |
| 3600 | GO:0018022 | Regulation | Transcription | P | peptidyl-lysine methylation                                                |
| 3601 | GO:0018026 | Regulation | Transcription | P | peptidyl-lysine monomethylation                                            |
| 3602 | GO:0070816 | Regulation | Transcription | P | phosphorylation of RNA polymerase II C-terminal domain                     |
| 3603 | GO:0000427 | Regulation | Transcription | C | plastid-encoded plastid RNA polymerase complex                             |
| 3604 | GO:0008143 | Regulation | Transcription | F | poly(A) binding                                                            |
| 3605 | GO:1905269 | Regulation | Transcription | P | positive regulation of chromatin organization                              |
| 3606 | GO:2001252 | Regulation | Transcription | P | positive regulation of chromosome organization                             |
| 3607 | GO:0032786 | Regulation | Transcription | P | positive regulation of DNA-templated transcription, elongation             |
| 3608 | GO:0010628 | Regulation | Transcription | P | positive regulation of gene expression                                     |
| 3609 | GO:1900111 | Regulation | Transcription | P | positive regulation of histone H3-K9 dimethylation                         |
| 3610 | GO:0031062 | Regulation | Transcription | P | positive regulation of histone methylation                                 |
| 3611 | GO:0031058 | Regulation | Transcription | P | positive regulation of histone modification                                |
| 3612 | GO:0060213 | Regulation | Transcription | P | positive regulation of nuclear-transcribed mRNA poly(A) tail shortening    |
| 3613 | GO:1903508 | Regulation | Transcription | P | positive regulation of nucleic acid-templated transcription                |
| 3614 | GO:0060148 | Regulation | Transcription | P | positive regulation of posttranscriptional gene silencing                  |
| 3615 | GO:1903705 | Regulation | Transcription | P | positive regulation of production of siRNA involved in RNA interference    |
| 3616 | GO:1902680 | Regulation | Transcription | P | positive regulation of RNA biosynthetic process                            |
| 3617 | GO:1900370 | Regulation | Transcription | P | positive regulation of RNA interference                                    |
| 3618 | GO:0045943 | Regulation | Transcription | P | positive regulation of transcription by RNA polymerase I                   |

|      |            |            |               |   |                                                                                                            |
|------|------------|------------|---------------|---|------------------------------------------------------------------------------------------------------------|
| 3619 | GO:0045944 | Regulation | Transcription | P | positive regulation of transcription by RNA polymerase II                                                  |
| 3620 | GO:0032968 | Regulation | Transcription | P | positive regulation of transcription elongation from RNA polymerase II promoter                            |
| 3621 | GO:0061408 | Regulation | Transcription | P | positive regulation of transcription from RNA polymerase II promoter in response to heat stress            |
| 3622 | GO:0006990 | Regulation | Transcription | P | positive regulation of transcription from RNA polymerase II promoter involved in unfolded protein response |
| 3623 | GO:0045893 | Regulation | Transcription | P | positive regulation of transcription, DNA-templated                                                        |
| 3624 | GO:0035194 | Regulation | Transcription | P | posttranscriptional gene silencing by RNA                                                                  |
| 3625 | GO:0140458 | Regulation | Transcription | P | pre-transcriptional gene silencing by RNA                                                                  |
| 3626 | GO:0070919 | Regulation | Transcription | P | production of siRNA involved in chromatin silencing by small RNA                                           |
| 3627 | GO:0030422 | Regulation | Transcription | P | production of siRNA involved in RNA interference                                                           |
| 3628 | GO:0070918 | Regulation | Transcription | P | production of small RNA involved in gene silencing by RNA                                                  |
| 3629 | GO:0010267 | Regulation | Transcription | P | production of ta-siRNAs involved in RNA interference                                                       |
| 3630 | GO:0006473 | Regulation | Transcription | P | protein acetylation                                                                                        |
| 3631 | GO:0031248 | Regulation | Transcription | C | protein acetyltransferase complex                                                                          |
| 3632 | GO:0043543 | Regulation | Transcription | P | protein acylation                                                                                          |
| 3633 | GO:0035601 | Regulation | Transcription | P | protein deacylation                                                                                        |
| 3634 | GO:0006482 | Regulation | Transcription | P | protein demethylation                                                                                      |
| 3635 | GO:0032993 | Regulation | Transcription | C | protein-DNA complex                                                                                        |
| 3636 | GO:0065004 | Regulation | Transcription | P | protein-DNA complex assembly                                                                               |
| 3637 | GO:0071824 | Regulation | Transcription | P | protein-DNA complex subunit organization                                                                   |
| 3638 | GO:0034402 | Regulation | Transcription | P | recruitment of 3'-end processing factors to RNA polymerase II holoenzyme complex                           |
| 3639 | GO:0031935 | Regulation | Transcription | P | regulation of chromatin silencing                                                                          |
| 3640 | GO:0031938 | Regulation | Transcription | P | regulation of chromatin silencing at telomere                                                              |
| 3641 | GO:0044030 | Regulation | Transcription | P | regulation of DNA methylation                                                                              |
| 3642 | GO:0051090 | Regulation | Transcription | P | regulation of DNA-binding transcription factor activity                                                    |
| 3643 | GO:0032784 | Regulation | Transcription | P | regulation of DNA-templated transcription, elongation                                                      |
| 3644 | GO:0010468 | Regulation | Transcription | P | regulation of gene expression                                                                              |
| 3645 | GO:0006349 | Regulation | Transcription | P | regulation of gene expression by genetic imprinting                                                        |
| 3646 | GO:0040029 | Regulation | Transcription | P | regulation of gene expression, epigenetic                                                                  |
| 3647 | GO:0060968 | Regulation | Transcription | P | regulation of gene silencing                                                                               |
| 3648 | GO:0060964 | Regulation | Transcription | P | regulation of gene silencing by miRNA                                                                      |
| 3649 | GO:0060966 | Regulation | Transcription | P | regulation of gene silencing by RNA                                                                        |
| 3650 | GO:1903506 | Regulation | Transcription | P | regulation of nucleic acid-templated transcription                                                         |
| 3651 | GO:2001141 | Regulation | Transcription | P | regulation of RNA biosynthetic process                                                                     |
| 3652 | GO:1900368 | Regulation | Transcription | P | regulation of RNA interference                                                                             |
| 3653 | GO:0006357 | Regulation | Transcription | P | regulation of transcription by RNA polymerase II                                                           |
| 3654 | GO:0043619 | Regulation | Transcription | P | regulation of transcription from RNA polymerase II promoter in response to oxidative stress                |
| 3655 | GO:0010767 | Regulation | Transcription | P | regulation of transcription from RNA polymerase II promoter in response to UV-induced DNA damage           |
| 3656 | GO:0006355 | Regulation | Transcription | P | regulation of transcription, DNA-templated                                                                 |
| 3657 | GO:0001067 | Regulation | Transcription | F | regulatory region nucleic acid binding                                                                     |
| 3658 | GO:0071076 | Regulation | Transcription | P | RNA 3' uridylation                                                                                         |
| 3659 | GO:0031123 | Regulation | Transcription | P | RNA 3'-end processing                                                                                      |
| 3660 | GO:0003723 | Regulation | Transcription | F | RNA binding                                                                                                |
| 3661 | GO:0032774 | Regulation | Transcription | P | RNA biosynthetic process                                                                                   |
| 3662 | GO:0034337 | Regulation | Transcription | P | RNA folding                                                                                                |
| 3663 | GO:0001510 | Regulation | Transcription | P | RNA methylation                                                                                            |
| 3664 | GO:0009451 | Regulation | Transcription | P | RNA modification                                                                                           |
| 3665 | GO:0097747 | Regulation | Transcription | F | RNA polymerase activity                                                                                    |
| 3666 | GO:0030880 | Regulation | Transcription | C | RNA polymerase complex                                                                                     |
| 3667 | GO:0001054 | Regulation | Transcription | F | RNA polymerase I activity                                                                                  |
| 3668 | GO:0005736 | Regulation | Transcription | C | RNA polymerase I complex                                                                                   |
| 3669 | GO:0001102 | Regulation | Transcription | F | RNA polymerase II activating transcription factor binding                                                  |
| 3670 | GO:0001055 | Regulation | Transcription | F | RNA polymerase II activity                                                                                 |
| 3671 | GO:0000993 | Regulation | Transcription | F | RNA polymerase II complex binding                                                                          |
| 3672 | GO:0001139 | Regulation | Transcription | F | RNA polymerase II complex recruiting activity                                                              |
| 3673 | GO:0000979 | Regulation | Transcription | F | RNA polymerase II core promoter sequence-specific DNA binding                                              |
| 3674 | GO:0008353 | Regulation | Transcription | F | RNA polymerase II CTD heptapeptide repeat kinase activity                                                  |
| 3675 | GO:0008420 | Regulation | Transcription | F | RNA polymerase II CTD heptapeptide repeat phosphatase activity                                             |
| 3676 | GO:0051123 | Regulation | Transcription | P | RNA polymerase II preinitiation complex assembly                                                           |
| 3677 | GO:0000978 | Regulation | Transcription | F | RNA polymerase II proximal promoter sequence-specific DNA binding                                          |
| 3678 | GO:0000977 | Regulation | Transcription | F | RNA polymerase II regulatory region sequence-specific DNA binding                                          |
| 3679 | GO:0090575 | Regulation | Transcription | C | RNA polymerase II transcription factor complex                                                             |
| 3680 | GO:0005665 | Regulation | Transcription | C | RNA polymerase II, core complex                                                                            |
| 3681 | GO:0016591 | Regulation | Transcription | C | RNA polymerase II, holoenzyme                                                                              |
| 3682 | GO:0001056 | Regulation | Transcription | F | RNA polymerase III activity                                                                                |
| 3683 | GO:0005666 | Regulation | Transcription | C | RNA polymerase III complex                                                                                 |
| 3684 | GO:0000995 | Regulation | Transcription | F | RNA polymerase III general transcription initiation factor activity                                        |
| 3685 | GO:0000418 | Regulation | Transcription | C | RNA polymerase IV complex                                                                                  |
| 3686 | GO:0000419 | Regulation | Transcription | C | RNA polymerase V complex                                                                                   |
| 3687 | GO:0050265 | Regulation | Transcription | F | RNA uridylyltransferase activity                                                                           |
| 3688 | GO:0003968 | Regulation | Transcription | F | RNA-directed 5'-3' RNA polymerase activity                                                                 |
| 3689 | GO:0080188 | Regulation | Transcription | P | RNA-directed DNA methylation                                                                               |
| 3690 | GO:0000124 | Regulation | Transcription | C | SAGA complex                                                                                               |
| 3691 | GO:0043565 | Regulation | Transcription | F | sequence-specific DNA binding                                                                              |

|      |            |            |               |   |                                                                                                                                                     |
|------|------------|------------|---------------|---|-----------------------------------------------------------------------------------------------------------------------------------------------------|
| 3692 | GO:1990837 | Regulation | Transcription | F | sequence-specific double-stranded DNA binding                                                                                                       |
| 3693 | GO:0035197 | Regulation | Transcription | F | siRNA binding                                                                                                                                       |
| 3694 | GO:0046695 | Regulation | Transcription | C | SLIK (SAGA-like) complex                                                                                                                            |
| 3695 | GO:0070603 | Regulation | Transcription | C | SWI/SNF superfamily-type complex                                                                                                                    |
| 3696 | GO:0070034 | Regulation | Transcription | F | telomerase RNA binding                                                                                                                              |
| 3697 | GO:0000347 | Regulation | Transcription | C | THO complex                                                                                                                                         |
| 3698 | GO:0000445 | Regulation | Transcription | C | THO complex part of transcription export complex                                                                                                    |
| 3699 | GO:0006366 | Regulation | Transcription | P | transcription by RNA polymerase II                                                                                                                  |
| 3700 | GO:0006383 | Regulation | Transcription | P | transcription by RNA polymerase III                                                                                                                 |
| 3701 | GO:0003713 | Regulation | Transcription | F | transcription coactivator activity                                                                                                                  |
| 3702 | GO:0003712 | Regulation | Transcription | F | transcription coregulator activity                                                                                                                  |
| 3703 | GO:0003714 | Regulation | Transcription | F | transcription corepressor activity                                                                                                                  |
| 3704 | GO:0008134 | Regulation | Transcription | F | transcription factor binding                                                                                                                        |
| 3705 | GO:0005667 | Regulation | Transcription | C | transcription factor complex                                                                                                                        |
| 3706 | GO:0005669 | Regulation | Transcription | C | transcription factor TFIID complex                                                                                                                  |
| 3707 | GO:0005674 | Regulation | Transcription | C | transcription factor TFIIF complex                                                                                                                  |
| 3708 | GO:0000439 | Regulation | Transcription | C | transcription factor TFIIF core complex                                                                                                             |
| 3709 | GO:0005675 | Regulation | Transcription | C | transcription factor TFIIF holo complex                                                                                                             |
| 3710 | GO:0000127 | Regulation | Transcription | C | transcription factor TFIIC complex                                                                                                                  |
| 3711 | GO:0070985 | Regulation | Transcription | C | transcription factor TFIIF complex                                                                                                                  |
| 3712 | GO:0006367 | Regulation | Transcription | P | transcription initiation from RNA polymerase II promoter                                                                                            |
| 3713 | GO:0006384 | Regulation | Transcription | P | transcription initiation from RNA polymerase III promoter                                                                                           |
| 3714 | GO:0070897 | Regulation | Transcription | P | transcription preinitiation complex assembly                                                                                                        |
| 3715 | GO:0140110 | Regulation | Transcription | F | transcription regulator activity                                                                                                                    |
| 3716 | GO:0044212 | Regulation | Transcription | F | transcription regulatory region DNA binding                                                                                                         |
| 3717 | GO:0000976 | Regulation | Transcription | F | transcription regulatory region sequence-specific DNA binding                                                                                       |
| 3718 | GO:0006351 | Regulation | Transcription | P | transcription, DNA-templated                                                                                                                        |
| 3719 | GO:0097550 | Regulation | Transcription | C | transcriptional preinitiation complex                                                                                                               |
| 3720 | GO:0001174 | Regulation | Transcription | P | transcriptional start site selection at RNA polymerase II promoter                                                                                  |
| 3721 | GO:0006283 | Regulation | Transcription | P | transcription-coupled nucleotide-excision repair                                                                                                    |
| 3722 | GO:0003746 | Regulation | Transcription | F | translation elongation factor activity                                                                                                              |
| 3723 | GO:0003743 | Regulation | Transcription | F | translation initiation factor activity                                                                                                              |
| 3724 | GO:0031372 | Regulation | Transcription | C | UBC13-MMS2 complex                                                                                                                                  |
| 3725 | GO:0004844 | Regulation | Transcription | F | uracil DNA N-glycosylase activity                                                                                                                   |
| 3726 | GO:0060145 | Regulation | Transcription | P | viral gene silencing in virus induced gene silencing                                                                                                |
| 3727 | GO:0042781 | Regulation | Translation   | F | 3'-tRNA processing endoribonuclease activity                                                                                                        |
| 3728 | GO:0008097 | Regulation | Translation   | F | 5S rRNA binding                                                                                                                                     |
| 3729 | GO:0030686 | Regulation | Translation   | C | 90S preribosome                                                                                                                                     |
| 3730 | GO:0000380 | Regulation | Translation   | P | alternative mRNA splicing, via spliceosome                                                                                                          |
| 3731 | GO:0002161 | Regulation | Translation   | F | aminoacyl-tRNA editing activity                                                                                                                     |
| 3732 | GO:0004812 | Regulation | Translation   | F | aminoacyl-tRNA ligase activity                                                                                                                      |
| 3733 | GO:1902626 | Regulation | Translation   | P | assembly of large subunit precursor of preribosome                                                                                                  |
| 3734 | GO:0000494 | Regulation | Translation   | P | box C/D snoRNA 3'-end processing                                                                                                                    |
| 3735 | GO:0031428 | Regulation | Translation   | C | box C/D snoRNP complex                                                                                                                              |
| 3736 | GO:0034513 | Regulation | Translation   | F | box H/ACA snoRNA binding                                                                                                                            |
| 3737 | GO:0031429 | Regulation | Translation   | C | box H/ACA snoRNP complex                                                                                                                            |
| 3738 | GO:0140101 | Regulation | Translation   | F | catalytic activity, acting on a tRNA                                                                                                                |
| 3739 | GO:0140098 | Regulation | Translation   | F | catalytic activity, acting on RNA                                                                                                                   |
| 3740 | GO:0071013 | Regulation | Translation   | C | catalytic step 2 spliceosome                                                                                                                        |
| 3741 | GO:0030014 | Regulation | Translation   | C | CCR4-NOT complex                                                                                                                                    |
| 3742 | GO:0030015 | Regulation | Translation   | C | CCR4-NOT core complex                                                                                                                               |
| 3743 | GO:0000354 | Regulation | Translation   | P | cis assembly of pre-catalytic spliceosome                                                                                                           |
| 3744 | GO:0000469 | Regulation | Translation   | P | cleavage involved in rRNA processing                                                                                                                |
| 3745 | GO:0000177 | Regulation | Translation   | C | cytoplasmic exosome (RNase complex)                                                                                                                 |
| 3746 | GO:0036464 | Regulation | Translation   | C | cytoplasmic ribonucleoprotein granule                                                                                                               |
| 3747 | GO:0002181 | Regulation | Translation   | P | cytoplasmic translation                                                                                                                             |
| 3748 | GO:0002183 | Regulation | Translation   | P | cytoplasmic translational initiation                                                                                                                |
| 3749 | GO:0002184 | Regulation | Translation   | P | cytoplasmic translational termination                                                                                                               |
| 3750 | GO:0022625 | Regulation | Translation   | C | cytosolic large ribosomal subunit                                                                                                                   |
| 3751 | GO:0022626 | Regulation | Translation   | C | cytosolic ribosome                                                                                                                                  |
| 3752 | GO:0022627 | Regulation | Translation   | C | cytosolic small ribosomal subunit                                                                                                                   |
| 3753 | GO:0000290 | Regulation | Translation   | P | deadenylation-dependent decapping of nuclear-transcribed mRNA                                                                                       |
| 3754 | GO:0003725 | Regulation | Translation   | F | double-stranded RNA binding                                                                                                                         |
| 3755 | GO:0000447 | Regulation | Translation   | P | endonucleolytic cleavage in ITS1 to separate SSU-rRNA from 5.8S rRNA and LSU-rRNA from tricistronic rRNA transcript (SSU-rRNA, 5.8S rRNA, LSU-rRNA) |
| 3756 | GO:0000478 | Regulation | Translation   | P | endonucleolytic cleavage involved in rRNA processing                                                                                                |
| 3757 | GO:0000461 | Regulation | Translation   | P | endonucleolytic cleavage to generate mature 3'-end of SSU-rRNA from (SSU-rRNA, 5.8S rRNA, LSU-rRNA)                                                 |
| 3758 | GO:0071784 | Regulation | Translation   | P | endoplasmic reticulum cisternal network assembly                                                                                                    |
| 3759 | GO:0051236 | Regulation | Translation   | P | establishment of RNA localization                                                                                                                   |
| 3760 | GO:0033290 | Regulation | Translation   | C | eukaryotic 48S preinitiation complex                                                                                                                |
| 3761 | GO:0005850 | Regulation | Translation   | C | eukaryotic translation initiation factor 2 complex                                                                                                  |
| 3762 | GO:0005851 | Regulation | Translation   | C | eukaryotic translation initiation factor 2B complex                                                                                                 |
| 3763 | GO:0005852 | Regulation | Translation   | C | eukaryotic translation initiation factor 3 complex                                                                                                  |
| 3764 | GO:0016281 | Regulation | Translation   | C | eukaryotic translation initiation factor 4F complex                                                                                                 |
| 3765 | GO:0000467 | Regulation | Translation   | P | exonucleolytic trimming to generate mature 3'-end of 5.8S rRNA from tricistronic rRNA transcript (SSU-rRNA, 5.8S rRNA, LSU-rRNA)                    |
| 3766 | GO:0004532 | Regulation | Translation   | F | exoribonuclease activity                                                                                                                            |

|      |            |            |             |   |                                                                           |
|------|------------|------------|-------------|---|---------------------------------------------------------------------------|
| 3767 | GO:0001731 | Regulation | Translation | P | formation of translation preinitiation complex                            |
| 3768 | GO:0000350 | Regulation | Translation | P | generation of catalytic spliceosome for second transesterification step   |
| 3769 | GO:0004819 | Regulation | Translation | F | glutamine-tRNA ligase activity                                            |
| 3770 | GO:0006425 | Regulation | Translation | P | glutaminyl-tRNA aminoacylation                                            |
| 3771 | GO:0006424 | Regulation | Translation | P | glutamyl-tRNA aminoacylation                                              |
| 3772 | GO:0000373 | Regulation | Translation | P | Group II intron splicing                                                  |
| 3773 | GO:0015934 | Regulation | Translation | C | large ribosomal subunit                                                   |
| 3774 | GO:0070180 | Regulation | Translation | F | large ribosomal subunit rRNA binding                                      |
| 3775 | GO:1990726 | Regulation | Translation | C | Lsm1-7-Pat1 complex                                                       |
| 3776 | GO:0000460 | Regulation | Translation | P | maturation of 5.8S rRNA                                                   |
|      |            |            |             |   | maturation of 5.8S rRNA from tricistronic rRNA transcript (SSU-rRNA, 5.8S |
| 3777 | GO:0000466 | Regulation | Translation | P | rRNA, LSU-rRNA)                                                           |
| 3778 | GO:0000481 | Regulation | Translation | P | maturation of 5S rRNA                                                     |
| 3779 | GO:0000470 | Regulation | Translation | P | maturation of LSU-rRNA                                                    |
|      |            |            |             |   | maturation of LSU-rRNA from tricistronic rRNA transcript (SSU-rRNA, 5.8S  |
| 3780 | GO:0000463 | Regulation | Translation | P | rRNA, LSU-rRNA)                                                           |
| 3781 | GO:0030490 | Regulation | Translation | P | maturation of SSU-rRNA                                                    |
|      |            |            |             |   | maturation of SSU-rRNA from tricistronic rRNA transcript (SSU-rRNA, 5.8S  |
| 3782 | GO:0000462 | Regulation | Translation | P | rRNA, LSU-rRNA)                                                           |
| 3783 | GO:0042256 | Regulation | Translation | P | mature ribosome assembly                                                  |
| 3784 | GO:0034709 | Regulation | Translation | C | methylosome                                                               |
| 3785 | GO:0035198 | Regulation | Translation | F | miRNA binding                                                             |
| 3786 | GO:0035278 | Regulation | Translation | P | miRNA mediated inhibition of translation                                  |
| 3787 | GO:0010586 | Regulation | Translation | P | miRNA metabolic process                                                   |
| 3788 | GO:0005762 | Regulation | Translation | C | mitochondrial large ribosomal subunit                                     |
| 3789 | GO:0080156 | Regulation | Translation | P | mitochondrial mRNA modification                                           |
| 3790 | GO:0005761 | Regulation | Translation | C | mitochondrial ribosome                                                    |
| 3791 | GO:1900864 | Regulation | Translation | P | mitochondrial RNA modification                                            |
| 3792 | GO:0005763 | Regulation | Translation | C | mitochondrial small ribosomal subunit                                     |
| 3793 | GO:0032543 | Regulation | Translation | P | mitochondrial translation                                                 |
| 3794 | GO:0090646 | Regulation | Translation | P | mitochondrial tRNA processing                                             |
| 3795 | GO:0031124 | Regulation | Translation | P | mRNA 3'-end processing                                                    |
| 3796 | GO:0003730 | Regulation | Translation | F | mRNA 3'-UTR binding                                                       |
| 3797 | GO:0003729 | Regulation | Translation | F | mRNA binding                                                              |
| 3798 | GO:0005845 | Regulation | Translation | C | mRNA cap binding complex                                                  |
| 3799 | GO:0045292 | Regulation | Translation | P | mRNA cis splicing, via spliceosome                                        |
| 3800 | GO:0006379 | Regulation | Translation | P | mRNA cleavage                                                             |
| 3801 | GO:0005849 | Regulation | Translation | C | mRNA cleavage factor complex                                              |
| 3802 | GO:0005848 | Regulation | Translation | C | mRNA cleavage stimulating factor complex                                  |
| 3803 | GO:0006406 | Regulation | Translation | P | mRNA export from nucleus                                                  |
| 3804 | GO:0016071 | Regulation | Translation | P | mRNA metabolic process                                                    |
| 3805 | GO:0016556 | Regulation | Translation | P | mRNA modification                                                         |
| 3806 | GO:1990481 | Regulation | Translation | P | mRNA pseudouridine synthesis                                              |
| 3807 | GO:0006376 | Regulation | Translation | P | mRNA splice site selection                                                |
| 3808 | GO:0000398 | Regulation | Translation | P | mRNA splicing, via spliceosome                                            |
| 3809 | GO:0051028 | Regulation | Translation | P | mRNA transport                                                            |
| 3810 | GO:0071427 | Regulation | Translation | P | mRNA-containing ribonucleoprotein complex export from nucleus             |
| 3811 | GO:0043614 | Regulation | Translation | C | multi-eIF complex                                                         |
| 3812 | GO:0005854 | Regulation | Translation | C | nascent polypeptide-associated complex                                    |
| 3813 | GO:0043628 | Regulation | Translation | P | ncRNA 3'-end processing                                                   |
| 3814 | GO:0034660 | Regulation | Translation | P | ncRNA metabolic process                                                   |
| 3815 | GO:0034470 | Regulation | Translation | P | ncRNA processing                                                          |
| 3816 | GO:0051253 | Regulation | Translation | P | negative regulation of RNA metabolic process                              |
| 3817 | GO:0045900 | Regulation | Translation | P | negative regulation of translational elongation                           |
| 3818 | GO:0030690 | Regulation | Translation | C | Noc1p-Noc2p complex                                                       |
| 3819 | GO:0030691 | Regulation | Translation | C | Noc2p-Noc3p complex                                                       |
| 3820 | GO:0071028 | Regulation | Translation | P | nuclear mRNA surveillance                                                 |
| 3821 | GO:0071042 | Regulation | Translation | P | nuclear polyadenylation-dependent mRNA catabolic process                  |
| 3822 | GO:0071035 | Regulation | Translation | P | nuclear polyadenylation-dependent rRNA catabolic process                  |
| 3823 | GO:0071038 | Regulation | Translation | P | nuclear polyadenylation-dependent tRNA catabolic process                  |
| 3824 | GO:0000956 | Regulation | Translation | P | nuclear-transcribed mRNA catabolic process                                |
| 3825 | GO:0000288 | Regulation | Translation | P | nuclear-transcribed mRNA catabolic process, deadenylation-dependent decay |
| 3826 | GO:0000291 | Regulation | Translation | P | nuclear-transcribed mRNA catabolic process, exonucleolytic                |
| 3827 | GO:0034427 | Regulation | Translation | P | nuclear-transcribed mRNA catabolic process, exonucleolytic, 3'-5'         |
| 3828 | GO:0000184 | Regulation | Translation | P | nuclear-transcribed mRNA catabolic process, nonsense-mediated decay       |
| 3829 | GO:0000315 | Regulation | Translation | C | organellar large ribosomal subunit                                        |
| 3830 | GO:0000313 | Regulation | Translation | C | organellar ribosome                                                       |
| 3831 | GO:0000314 | Regulation | Translation | C | organellar small ribosomal subunit                                        |
| 3832 | GO:0070545 | Regulation | Translation | C | PeBoW complex                                                             |
| 3833 | GO:0043043 | Regulation | Translation | P | peptide biosynthetic process                                              |
| 3834 | GO:0004826 | Regulation | Translation | F | phenylalanine-tRNA ligase activity                                        |
| 3835 | GO:0009328 | Regulation | Translation | C | phenylalanine-tRNA ligase complex                                         |
| 3836 | GO:0006432 | Regulation | Translation | P | phenylalanyl-tRNA aminoacylation                                          |
| 3837 | GO:0034715 | Regulation | Translation | C | pICln-Sm protein complex                                                  |
| 3838 | GO:0004535 | Regulation | Translation | F | poly(A)-specific ribonuclease activity                                    |
| 3839 | GO:0008266 | Regulation | Translation | F | poly(U) RNA binding                                                       |
| 3840 | GO:0071051 | Regulation | Translation | P | polyadenylation-dependent snoRNA 3'-end processing                        |
| 3841 | GO:0031426 | Regulation | Translation | P | polycistronic mRNA processing                                             |



|      |            |            |             |   |                                                                                      |
|------|------------|------------|-------------|---|--------------------------------------------------------------------------------------|
| 3842 | GO:0042788 | Regulation | Translation | C | polysomal ribosome                                                                   |
| 3843 | GO:0048026 | Regulation | Translation | P | positive regulation of mRNA splicing, via spliceosome                                |
| 3844 | GO:0051254 | Regulation | Translation | P | positive regulation of RNA metabolic process                                         |
| 3845 | GO:0045727 | Regulation | Translation | P | positive regulation of translation                                                   |
| 3846 | GO:0045901 | Regulation | Translation | P | positive regulation of translational elongation                                      |
| 3847 | GO:0045903 | Regulation | Translation | P | positive regulation of translational fidelity                                        |
| 3848 | GO:0045948 | Regulation | Translation | P | positive regulation of translational initiation                                      |
| 3849 | GO:0045905 | Regulation | Translation | P | positive regulation of translational termination                                     |
| 3850 | GO:0016441 | Regulation | Translation | P | posttranscriptional gene silencing                                                   |
| 3851 | GO:0010608 | Regulation | Translation | P | posttranscriptional regulation of gene expression                                    |
| 3852 | GO:0071011 | Regulation | Translation | C | precatalytic spliceosome                                                             |
| 3853 | GO:0031054 | Regulation | Translation | P | pre-miRNA processing                                                                 |
| 3854 | GO:0030628 | Regulation | Translation | F | pre-mRNA 3'-splice site binding                                                      |
| 3855 | GO:0097157 | Regulation | Translation | F | pre-mRNA intronic binding                                                            |
| 3856 | GO:0030684 | Regulation | Translation | C | preribosome                                                                          |
| 3857 | GO:0030687 | Regulation | Translation | C | preribosome, large subunit precursor                                                 |
| 3858 | GO:0071010 | Regulation | Translation | C | prespliceosome                                                                       |
| 3859 | GO:0031053 | Regulation | Translation | P | primary miRNA processing                                                             |
| 3860 | GO:0010599 | Regulation | Translation | P | production of lsiRNA involved in RNA interference                                    |
| 3861 | GO:0035196 | Regulation | Translation | P | production of miRNAs involved in gene silencing by miRNA                             |
| 3862 | GO:0000974 | Regulation | Translation | C | Prp19 complex                                                                        |
| 3863 | GO:0034388 | Regulation | Translation | C | Pwp2p-containing subcomplex of 90S preribosome                                       |
| 3864 | GO:0000182 | Regulation | Translation | F | rDNA binding                                                                         |
| 3865 | GO:0030875 | Regulation | Translation | C | rDNA protrusion                                                                      |
| 3866 | GO:0000381 | Regulation | Translation | P | regulation of alternative mRNA splicing, via spliceosome                             |
| 3867 | GO:0010603 | Regulation | Translation | P | regulation of cytoplasmic mRNA processing body assembly                              |
| 3868 | GO:0043488 | Regulation | Translation | P | regulation of mRNA stability                                                         |
| 3869 | GO:0060211 | Regulation | Translation | P | regulation of nuclear-transcribed mRNA poly(A) tail shortening                       |
| 3870 | GO:0051252 | Regulation | Translation | P | regulation of RNA metabolic process                                                  |
| 3871 | GO:0043484 | Regulation | Translation | P | regulation of RNA splicing                                                           |
| 3872 | GO:0006417 | Regulation | Translation | P | regulation of translation                                                            |
| 3873 | GO:0006446 | Regulation | Translation | P | regulation of translational initiation                                               |
| 3874 | GO:0061980 | Regulation | Translation | F | regulatory RNA binding                                                               |
| 3875 | GO:0070274 | Regulation | Translation | C | RES complex                                                                          |
| 3876 | GO:0072344 | Regulation | Translation | P | rescue of stalled ribosome                                                           |
| 3877 | GO:0004540 | Regulation | Translation | F | ribonuclease activity                                                                |
| 3878 | GO:0004525 | Regulation | Translation | F | ribonuclease III activity                                                            |
| 3879 | GO:0008428 | Regulation | Translation | F | ribonuclease inhibitor activity                                                      |
| 3880 | GO:0004526 | Regulation | Translation | F | ribonuclease P activity                                                              |
| 3881 | GO:0033897 | Regulation | Translation | F | ribonuclease T2 activity                                                             |
| 3882 | GO:1990904 | Regulation | Translation | C | ribonucleoprotein complex                                                            |
| 3883 | GO:0022618 | Regulation | Translation | P | ribonucleoprotein complex assembly                                                   |
| 3884 | GO:0022613 | Regulation | Translation | P | ribonucleoprotein complex biogenesis                                                 |
| 3885 | GO:0071426 | Regulation | Translation | P | ribonucleoprotein complex export from nucleus                                        |
| 3886 | GO:0071166 | Regulation | Translation | P | ribonucleoprotein complex localization                                               |
| 3887 | GO:0071826 | Regulation | Translation | P | ribonucleoprotein complex subunit organization                                       |
| 3888 | GO:0035770 | Regulation | Translation | C | ribonucleoprotein granule                                                            |
| 3889 | GO:0004748 | Regulation | Translation | F | ribonucleoside-diphosphate reductase activity, thioredoxin disulfide as acceptor     |
| 3890 | GO:0032553 | Regulation | Translation | F | ribonucleotide binding                                                               |
| 3891 | GO:0000027 | Regulation | Translation | P | ribosomal large subunit assembly                                                     |
| 3892 | GO:0043023 | Regulation | Translation | F | ribosomal large subunit binding                                                      |
| 3893 | GO:0042273 | Regulation | Translation | P | ribosomal large subunit biogenesis                                                   |
| 3894 | GO:0000028 | Regulation | Translation | P | ribosomal small subunit assembly                                                     |
| 3895 | GO:0043024 | Regulation | Translation | F | ribosomal small subunit binding                                                      |
| 3896 | GO:0042274 | Regulation | Translation | P | ribosomal small subunit biogenesis                                                   |
| 3897 | GO:0044391 | Regulation | Translation | C | ribosomal subunit                                                                    |
| 3898 | GO:0005840 | Regulation | Translation | C | ribosome                                                                             |
| 3899 | GO:0042255 | Regulation | translation | P | ribosome assembly                                                                    |
| 3900 | GO:0043022 | Regulation | Translation | F | ribosome binding                                                                     |
| 3901 | GO:0042254 | Regulation | Translation | P | ribosome biogenesis                                                                  |
| 3902 | GO:0032790 | Regulation | Translation | P | ribosome disassembly                                                                 |
| 3903 | GO:0097344 | Regulation | Translation | C | Rix1 complex                                                                         |
| 3904 | GO:0000340 | Regulation | Translation | F | RNA 7-methylguanosine cap binding                                                    |
| 3905 | GO:0000339 | Regulation | Translation | F | RNA cap binding                                                                      |
| 3906 | GO:0006405 | Regulation | Translation | P | RNA export from nucleus                                                              |
| 3907 | GO:0003724 | Regulation | Translation | F | RNA helicase activity                                                                |
| 3908 | GO:0016246 | Regulation | Translation | P | RNA interference                                                                     |
| 3909 | GO:0006403 | Regulation | Translation | P | RNA localization                                                                     |
| 3910 | GO:0008173 | Regulation | Translation | F | RNA methyltransferase activity                                                       |
| 3911 | GO:0090501 | Regulation | Translation | P | RNA phosphodiester bond hydrolysis                                                   |
| 3912 | GO:0043631 | Regulation | Translation | P | RNA polyadenylation                                                                  |
| 3913 | GO:0006396 | Regulation | Translation | P | RNA processing                                                                       |
| 3914 | GO:0010501 | Regulation | Translation | P | RNA secondary structure unwinding                                                    |
| 3915 | GO:0008380 | Regulation | Translation | P | RNA splicing                                                                         |
| 3916 | GO:0000394 | Regulation | Translation | P | RNA splicing, via endonucleolytic cleavage and ligation                              |
| 3917 | GO:0000375 | Regulation | Translation | P | RNA splicing, via transesterification reactions                                      |
| 3918 | GO:0000377 | Regulation | Translation | P | RNA splicing, via transesterification reactions with bulged adenosine as nucleophile |

|      |            |            |             |   |                                                              |
|------|------------|------------|-------------|---|--------------------------------------------------------------|
| 3919 | GO:0043489 | Regulation | Translation | P | RNA stabilization                                            |
| 3920 | GO:0070042 | Regulation | Translation | F | rRNA (uridine-N3-)-methyltransferase activity                |
| 3921 | GO:1904812 | Regulation | Translation | P | rRNA acetylation involved in maturation of SSU-rRNA          |
| 3922 | GO:0070475 | Regulation | Translation | P | rRNA base methylation                                        |
| 3923 | GO:0019843 | Regulation | Translation | F | rRNA binding                                                 |
| 3924 | GO:1990883 | Regulation | Translation | F | rRNA cytidine N-acetyltransferase activity                   |
| 3925 | GO:0016072 | Regulation | Translation | P | rRNA metabolic process                                       |
| 3926 | GO:0031167 | Regulation | Translation | P | rRNA methylation                                             |
| 3927 | GO:0008649 | Regulation | Translation | F | rRNA methyltransferase activity                              |
| 3928 | GO:0000154 | Regulation | Translation | P | rRNA modification                                            |
| 3929 | GO:0006364 | Regulation | Translation | P | rRNA processing                                              |
| 3930 | GO:0031118 | Regulation | Translation | P | rRNA pseudouridine synthesis                                 |
| 3931 | GO:0000386 | Regulation | Translation | F | second spliceosomal transesterification activity             |
| 3932 | GO:1990825 | Regulation | Translation | F | sequence-specific mRNA binding                               |
| 3933 | GO:0003727 | Regulation | Translation | F | single-stranded RNA binding                                  |
| 3934 | GO:0030532 | Regulation | Translation | C | small nuclear ribonucleoprotein complex                      |
| 3935 | GO:0005732 | Regulation | Translation | C | small nucleolar ribonucleoprotein complex                    |
| 3936 | GO:0015935 | Regulation | Translation | C | small ribosomal subunit                                      |
| 3937 | GO:0070181 | Regulation | Translation | F | small ribosomal subunit rRNA binding                         |
| 3938 | GO:0032040 | Regulation | Translation | C | small-subunit processome                                     |
| 3939 | GO:0034719 | Regulation | Translation | C | SMN-Sm protein complex                                       |
| 3940 | GO:0030515 | Regulation | Translation | F | snoRNA binding                                               |
| 3941 | GO:0043144 | Regulation | Translation | P | snoRNA processing                                            |
| 3942 | GO:0034247 | Regulation | Translation | P | snoRNA splicing                                              |
| 3943 | GO:0017069 | Regulation | Translation | F | snRNA binding                                                |
| 3944 | GO:0061015 | Regulation | Translation | P | snRNA import into nucleus                                    |
| 3945 | GO:0016073 | Regulation | Translation | P | snRNA metabolic process                                      |
| 3946 | GO:0040031 | Regulation | Translation | P | snRNA modification                                           |
| 3947 | GO:0016180 | Regulation | Translation | P | snRNA processing                                             |
| 3948 | GO:0031120 | Regulation | Translation | P | snRNA pseudouridine synthesis                                |
| 3949 | GO:0005681 | Regulation | Translation | C | spliceosomal complex                                         |
| 3950 | GO:0000245 | Regulation | Translation | P | spliceosomal complex assembly                                |
| 3951 | GO:0000387 | Regulation | Translation | P | spliceosomal snRNP assembly                                  |
| 3952 | GO:0097525 | Regulation | Translation | C | spliceosomal snRNP complex                                   |
| 3953 | GO:0097526 | Regulation | Translation | C | spliceosomal tri-snRNP complex                               |
| 3954 | GO:0000244 | Regulation | Translation | P | spliceosomal tri-snRNP complex assembly                      |
| 3955 | GO:0003735 | Regulation | Translation | F | structural constituent of ribosome                           |
| 3956 | GO:0006412 | Regulation | Translation | P | translation                                                  |
| 3957 | GO:0031369 | Regulation | Translation | F | translation initiation factor binding                        |
| 3958 | GO:0002188 | Regulation | Translation | P | translation reinitiation                                     |
| 3959 | GO:0003747 | Regulation | Translation | F | translation release factor activity                          |
| 3960 | GO:0016149 | Regulation | Translation | F | translation release factor activity, codon specific          |
| 3961 | GO:0018444 | Regulation | Translation | C | translation release factor complex                           |
| 3962 | GO:0006414 | Regulation | Translation | P | translational elongation                                     |
| 3963 | GO:0006452 | Regulation | Translation | P | translational frameshifting                                  |
| 3964 | GO:0006413 | Regulation | Translation | P | translational initiation                                     |
| 3965 | GO:0006415 | Regulation | Translation | P | translational termination                                    |
| 3966 | GO:0016429 | Regulation | Translation | F | tRNA (adenine-N1-)-methyltransferase activity                |
| 3967 | GO:0016423 | Regulation | Translation | F | tRNA (guanine) methyltransferase activity                    |
| 3968 | GO:0009019 | Regulation | Translation | F | tRNA (guanine-N1-)-methyltransferase activity                |
| 3969 | GO:0009020 | Regulation | Translation | F | tRNA (guanosine-2'-O-)-methyltransferase activity            |
| 3970 | GO:0031515 | Regulation | Translation | C | tRNA (m1A) methyltransferase complex                         |
| 3971 | GO:0042780 | Regulation | Translation | P | tRNA 3'-end processing                                       |
| 3972 | GO:0034414 | Regulation | Translation | P | tRNA 3'-trailer cleavage, endonucleolytic                    |
| 3973 | GO:0001682 | Regulation | Translation | P | tRNA 5'-leader removal                                       |
| 3974 | GO:0043039 | Regulation | Translation | P | tRNA aminoacylation                                          |
| 3975 | GO:0000049 | Regulation | Translation | F | tRNA binding                                                 |
| 3976 | GO:0017150 | Regulation | Translation | F | tRNA dihydrouridine synthase activity                        |
| 3977 | GO:0002938 | Regulation | Translation | P | tRNA guanine ribose methylation                              |
| 3978 | GO:0016031 | Regulation | Translation | P | tRNA import into mitochondrion                               |
| 3979 | GO:0006399 | Regulation | Translation | P | tRNA metabolic process                                       |
| 3980 | GO:0030488 | Regulation | Translation | P | tRNA methylation                                             |
| 3981 | GO:0008175 | Regulation | Translation | F | tRNA methyltransferase activity                              |
| 3982 | GO:0006400 | Regulation | Translation | P | tRNA modification                                            |
| 3983 | GO:0008033 | Regulation | Translation | P | tRNA processing                                              |
| 3984 | GO:0106029 | Regulation | Translation | F | tRNA pseudouridine synthase activity                         |
| 3985 | GO:0031119 | Regulation | Translation | P | tRNA pseudouridine synthesis                                 |
| 3986 | GO:0034227 | Regulation | Translation | P | tRNA thio-modification                                       |
| 3987 | GO:0002926 | Regulation | Translation | P | tRNA wobble base 5-methoxycarbonylmethyl-2-thiouridinylation |
| 3988 | GO:0002143 | Regulation | Translation | P | tRNA wobble position uridine thiolation                      |
| 3989 | GO:0002098 | Regulation | Translation | P | tRNA wobble uridine modification                             |
| 3990 | GO:0034473 | Regulation | Translation | P | U1 snRNA 3'-end processing                                   |
| 3991 | GO:0030619 | Regulation | Translation | F | U1 snRNA binding                                             |
| 3992 | GO:0005685 | Regulation | Translation | C | U1 snRNP                                                     |
| 3993 | GO:0005689 | Regulation | Translation | C | U12-type spliceosomal complex                                |
| 3994 | GO:0030620 | Regulation | Translation | F | U2 snRNA binding                                             |
| 3995 | GO:0005686 | Regulation | Translation | C | U2 snRNP                                                     |
| 3996 | GO:0089701 | Regulation | Translation | C | U2AF                                                         |

|      |            |                        |             |   |                                                                           |
|------|------------|------------------------|-------------|---|---------------------------------------------------------------------------|
| 3997 | GO:0071021 | Regulation             | Translation | C | U2-type post-spliceosomal complex                                         |
| 3998 | GO:0071004 | Regulation             | Translation | C | U2-type prespliceosome                                                    |
| 3999 | GO:0005684 | Regulation             | Translation | C | U2-type spliceosomal complex                                              |
| 4000 | GO:0034511 | Regulation             | Translation | F | U3 snoRNA binding                                                         |
| 4001 | GO:0034475 | Regulation             | Translation | P | U4 snRNA 3'-end processing                                                |
| 4002 | GO:0005687 | Regulation             | Translation | C | U4 snRNP                                                                  |
| 4003 | GO:0046540 | Regulation             | Translation | C | U4/U6 x U5 tri-snRNP complex                                              |
| 4004 | GO:0034476 | Regulation             | Translation | P | U5 snRNA 3'-end processing                                                |
| 4005 | GO:0030623 | Regulation             | Translation | F | U5 snRNA binding                                                          |
| 4006 | GO:0005682 | Regulation             | translation | C | U5 snRNP                                                                  |
| 4007 | GO:0017070 | Regulation             | Translation | F | U6 snRNA binding                                                          |
| 4008 | GO:0005688 | Regulation             | Translation | C | U6 snRNP                                                                  |
| 4009 | GO:0004832 | Regulation             | Translation | F | valine-tRNA ligase activity                                               |
| 4010 | GO:0006438 | Regulation             | Translation | P | valyl-tRNA aminoacylation                                                 |
| 4011 | GO:0004430 | Signaling and response | Signaling   | F | 1-phosphatidylinositol 4-kinase activity                                  |
| 4012 | GO:0016308 | Signaling and response | Signaling   | F | 1-phosphatidylinositol-4-phosphate 5-kinase activity                      |
| 4013 | GO:0030797 | Signaling and response | Signaling   | F | 24-methylenesterol C-methyltransferase activity                           |
| 4014 | GO:0060321 | Signaling and response | Signaling   | P | acceptance of pollen                                                      |
| 4015 | GO:0003993 | Signaling and response | Signaling   | F | acid phosphatase activity                                                 |
| 4016 | GO:0010541 | Signaling and response | Signaling   | P | acropetal auxin transport                                                 |
| 4017 | GO:0090630 | Signaling and response | Signaling   | P | activation of GTPase activity                                             |
| 4018 | GO:0032147 | Signaling and response | Signaling   | P | activation of protein kinase activity                                     |
| 4019 | GO:0007188 | Signaling and response | Signaling   | P | adenylate cyclase-modulating G protein-coupled receptor signaling pathway |
| 4020 | GO:0010011 | Signaling and response | Signaling   | F | auxin binding                                                             |
| 4021 | GO:0009851 | Signaling and response | Signaling   | P | auxin biosynthetic process                                                |
| 4022 | GO:0010315 | Signaling and response | Signaling   | P | auxin efflux                                                              |
| 4023 | GO:0010329 | Signaling and response | Signaling   | F | auxin efflux transmembrane transporter activity                           |
| 4024 | GO:0060919 | Signaling and response | Signaling   | P | auxin influx                                                              |
| 4025 | GO:0010328 | Signaling and response | Signaling   | F | auxin influx transmembrane transporter activity                           |
| 4026 | GO:0060774 | Signaling and response | Signaling   | P | auxin mediated signaling pathway involved in phyllotactic patterning      |
| 4027 | GO:0009850 | Signaling and response | Signaling   | P | auxin metabolic process                                                   |
| 4028 | GO:0009926 | Signaling and response | Signaling   | P | auxin polar transport                                                     |
| 4029 | GO:0060918 | Signaling and response | Signaling   | P | auxin transport                                                           |
| 4030 | GO:0009734 | Signaling and response | Signaling   | P | auxin-activated signaling pathway                                         |
| 4031 | GO:0010540 | Signaling and response | Signaling   | P | basipetal auxin transport                                                 |
| 4032 | GO:0009785 | Signaling and response | Signaling   | P | blue light signaling pathway                                              |
| 4033 | GO:0016132 | Signaling and response | Signaling   | P | brassinosteroid biosynthetic process                                      |
| 4034 | GO:0009742 | Signaling and response | Signaling   | P | brassinosteroid mediated signaling pathway                                |
| 4035 | GO:0016131 | Signaling and response | Signaling   | P | brassinosteroid metabolic process                                         |
| 4036 | GO:0052634 | Signaling and response | Signaling   | F | C-19 gibberellin 2-beta-dioxygenase activity                              |
| 4037 | GO:0000248 | Signaling and response | Signaling   | F | C-5 sterol desaturase activity                                            |
| 4038 | GO:0005509 | Signaling and response | Signaling   | F | calcium ion binding                                                       |
| 4039 | GO:0009931 | Signaling and response | Signaling   | F | calcium-dependent protein serine/threonine kinase activity                |
| 4040 | GO:0019722 | Signaling and response | Signaling   | P | calcium-mediated signaling                                                |
| 4041 | GO:0005516 | Signaling and response | Signaling   | F | calmodulin binding                                                        |
| 4042 | GO:0004683 | Signaling and response | Signaling   | F | calmodulin-dependent protein kinase activity                              |
| 4043 | GO:0007154 | Signaling and response | Signaling   | P | cell communication                                                        |
| 4044 | GO:0007166 | Signaling and response | Signaling   | P | cell surface receptor signaling pathway                                   |
| 4045 | GO:0007267 | Signaling and response | Signaling   | P | cell-cell signaling                                                       |
| 4046 | GO:0071214 | Signaling and response | Signaling   | P | cellular response to abiotic stimulus                                     |
| 4047 | GO:0071229 | Signaling and response | Signaling   | P | cellular response to acid chemical                                        |
| 4048 | GO:0071318 | Signaling and response | Signaling   | P | cellular response to ATP                                                  |
| 4049 | GO:0071365 | Signaling and response | Signaling   | P | cellular response to auxin stimulus                                       |
| 4050 | GO:0071483 | Signaling and response | Signaling   | P | cellular response to blue light                                           |
| 4051 | GO:0080029 | Signaling and response | Signaling   | P | cellular response to boron-containing substance levels                    |
| 4052 | GO:0071367 | Signaling and response | Signaling   | P | cellular response to brassinosteroid stimulus                             |
| 4053 | GO:0071277 | Signaling and response | Signaling   | P | cellular response to calcium ion                                          |
| 4054 | GO:0071244 | Signaling and response | Signaling   | P | cellular response to carbon dioxide                                       |
| 4055 | GO:0070887 | Signaling and response | Signaling   | P | cellular response to chemical stimulus                                    |
| 4056 | GO:0070417 | Signaling and response | Signaling   | P | cellular response to cold                                                 |
| 4057 | GO:0071280 | Signaling and response | Signaling   | P | cellular response to copper ion                                           |
| 4058 | GO:0071368 | Signaling and response | Signaling   | P | cellular response to cytokinin stimulus                                   |
| 4059 | GO:0104004 | Signaling and response | Signaling   | P | cellular response to environmental stimulus                               |
| 4060 | GO:0071496 | Signaling and response | Signaling   | P | cellular response to external stimulus                                    |
| 4061 | GO:0031668 | Signaling and response | Signaling   | P | cellular response to extracellular stimulus                               |
| 4062 | GO:0071490 | Signaling and response | Signaling   | P | cellular response to far red light                                        |
| 4063 | GO:0071398 | Signaling and response | Signaling   | P | cellular response to fatty acid                                           |
| 4064 | GO:0071370 | Signaling and response | Signaling   | P | cellular response to gibberellin stimulus                                 |
| 4065 | GO:0071366 | Signaling and response | Signaling   | P | cellular response to indolebutyric acid stimulus                          |
| 4066 | GO:0071281 | Signaling and response | Signaling   | P | cellular response to iron ion                                             |
| 4067 | GO:0010106 | Signaling and response | Signaling   | P | cellular response to iron ion starvation                                  |
| 4068 | GO:0071395 | Signaling and response | Signaling   | P | cellular response to jasmonic acid stimulus                               |
| 4069 | GO:0071482 | Signaling and response | Signaling   | P | cellular response to light stimulus                                       |
| 4070 | GO:0071396 | Signaling and response | Signaling   | P | cellular response to lipid                                                |
| 4071 | GO:0071286 | Signaling and response | Signaling   | P | cellular response to magnesium ion                                        |
| 4072 | GO:0010350 | Signaling and response | Signaling   | P | cellular response to magnesium starvation                                 |
| 4073 | GO:0071325 | Signaling and response | Signaling   | P | cellular response to mannitol stimulus                                    |
| 4074 | GO:0071249 | Signaling and response | Signaling   | P | cellular response to nitrate                                              |

|      |            |                        |           |   |                                                                   |
|------|------------|------------------------|-----------|---|-------------------------------------------------------------------|
| 4075 | GO:0043562 | Signaling and response | Signaling | P | cellular response to nitrogen levels                              |
| 4076 | GO:0031669 | Signaling and response | Signaling | P | cellular response to nutrient levels                              |
| 4077 | GO:0071453 | Signaling and response | Signaling | P | cellular response to oxygen levels                                |
| 4078 | GO:1901701 | Signaling and response | Signaling | P | cellular response to oxygen-containing compound                   |
| 4079 | GO:0035865 | Signaling and response | Signaling | P | cellular response to potassium ion                                |
| 4080 | GO:0071478 | Signaling and response | Signaling | P | cellular response to radiation                                    |
| 4081 | GO:0071491 | Signaling and response | Signaling | P | cellular response to red light                                    |
| 4082 | GO:0071446 | Signaling and response | Signaling | P | cellular response to salicylic acid stimulus                      |
| 4083 | GO:0072709 | Signaling and response | Signaling | P | cellular response to sorbitol                                     |
| 4084 | GO:0051716 | Signaling and response | Signaling | P | cellular response to stimulus                                     |
| 4085 | GO:0071329 | Signaling and response | Signaling | P | cellular response to sucrose stimulus                             |
| 4086 | GO:1904482 | Signaling and response | Signaling | P | cellular response to tetrahydrofolate                             |
| 4087 | GO:0071462 | Signaling and response | Signaling | P | cellular response to water stimulus                               |
| 4088 | GO:0010617 | Signaling and response | Signaling | P | circadian regulation of calcium ion oscillation                   |
| 4089 | GO:0007623 | Signaling and response | Signaling | P | circadian rhythm                                                  |
| 4090 | GO:0010031 | Signaling and response | Signaling | P | circumnutation                                                    |
| 4091 | GO:0050897 | Signaling and response | Signaling | F | cobalt ion binding                                                |
| 4092 | GO:0008180 | Signaling and response | Signaling | C | COP9 signalosome                                                  |
| 4093 | GO:0010387 | Signaling and response | Signaling | P | COP9 signalosome assembly                                         |
| 4094 | GO:0009691 | Signaling and response | Signaling | P | cytokinin biosynthetic process                                    |
| 4095 | GO:0009690 | Signaling and response | Signaling | P | cytokinin metabolic process                                       |
| 4096 | GO:0009736 | Signaling and response | Signaling | P | cytokinin-activated signaling pathway                             |
| 4097 | GO:0016311 | Signaling and response | Signaling | P | dephosphorylation                                                 |
| 4098 | GO:0009729 | Signaling and response | Signaling | P | detection of brassinosteroid stimulus                             |
| 4099 | GO:0005513 | Signaling and response | Signaling | P | detection of calcium ion                                          |
| 4100 | GO:0050982 | Signaling and response | Signaling | P | detection of mechanical stimulus                                  |
| 4101 | GO:0015036 | Signaling and response | Signaling | F | disulfide oxidoreductase activity                                 |
| 4102 | GO:0009649 | Signaling and response | Signaling | P | entrainment of circadian clock                                    |
| 4103 | GO:0106167 | Signaling and response | Signaling | P | extracellular ATP signaling                                       |
| 4104 | GO:0010018 | Signaling and response | Signaling | P | far-red light signaling pathway                                   |
| 4105 | GO:0001664 | Signaling and response | Signaling | F | G protein-coupled receptor binding                                |
| 4106 | GO:0007186 | Signaling and response | Signaling | P | G protein-coupled receptor signaling pathway                      |
| 4107 | GO:0009740 | Signaling and response | Signaling | P | gibberellic acid mediated signaling pathway                       |
| 4108 | GO:1905200 | Signaling and response | Signaling | P | gibberellic acid transmembrane transport                          |
| 4109 | GO:0045544 | Signaling and response | Signaling | F | gibberellin 20-oxidase activity                                   |
| 4110 | GO:0102118 | Signaling and response | Signaling | F | gibberellin A4 carboxyl methyltransferase activity                |
| 4111 | GO:0010331 | Signaling and response | Signaling | F | gibberellin binding                                               |
| 4112 | GO:0009686 | Signaling and response | Signaling | P | gibberellin biosynthetic process                                  |
| 4113 | GO:0010341 | Signaling and response | Signaling | F | gibberellin carboxyl-O-methyltransferase activity                 |
| 4114 | GO:0010476 | Signaling and response | Signaling | P | gibberellin mediated signaling pathway                            |
| 4115 | GO:1905201 | Signaling and response | Signaling | F | gibberellin transmembrane transporter activity                    |
| 4116 | GO:0010255 | Signaling and response | Signaling | P | glucose mediated signaling pathway                                |
| 4117 | GO:0031683 | Signaling and response | Signaling | F | G-protein beta/gamma-subunit complex binding                      |
| 4118 | GO:0009630 | Signaling and response | Signaling | P | gravitropism                                                      |
| 4119 | GO:0008083 | Signaling and response | Signaling | F | growth factor activity                                            |
| 4120 | GO:0008728 | Signaling and response | Signaling | F | GTP diphosphokinase activity                                      |
| 4121 | GO:0102489 | Signaling and response | Signaling | F | GTP phosphohydrolase activity                                     |
| 4122 | GO:0051020 | Signaling and response | Signaling | F | GTPase binding                                                    |
| 4123 | GO:0030742 | Signaling and response | Signaling | F | GTP-dependent protein binding                                     |
| 4124 | GO:0005834 | Signaling and response | Signaling | C | heterotrimeric G-protein complex                                  |
| 4125 | GO:0009755 | Signaling and response | Signaling | P | hormone-mediated signaling pathway                                |
| 4126 | GO:0010274 | Signaling and response | Signaling | P | hydrotropism                                                      |
| 4127 | GO:0010179 | Signaling and response | Signaling | F | IAA-Ala conjugate hydrolase activity                              |
| 4128 | GO:0010211 | Signaling and response | Signaling | F | IAA-Leu conjugate hydrolase activity                              |
| 4129 | GO:0010210 | Signaling and response | Signaling | F | IAA-Phe conjugate hydrolase activity                              |
| 4130 | GO:0051749 | Signaling and response | Signaling | F | indole acetic acid carboxyl methyltransferase activity            |
| 4131 | GO:0047215 | Signaling and response | Signaling | F | indole-3-acetate beta-glucosyltransferase activity                |
| 4132 | GO:0010279 | Signaling and response | Signaling | F | indole-3-acetic acid amido synthetase activity                    |
| 4133 | GO:0009684 | Signaling and response | Signaling | P | indoleacetic acid biosynthetic process                            |
| 4134 | GO:0046855 | Signaling and response | Signaling | P | inositol phosphate dephosphorylation                              |
| 4135 | GO:0007229 | Signaling and response | Signaling | P | integrin-mediated signaling pathway                               |
| 4136 | GO:0035556 | Signaling and response | Signaling | P | intracellular signal transduction                                 |
| 4137 | GO:0032366 | Signaling and response | Signaling | P | intracellular sterol transport                                    |
| 4138 | GO:0030795 | Signaling and response | Signaling | F | jasmonate O-methyltransferase activity                            |
| 4139 | GO:0009695 | Signaling and response | Signaling | P | jasmonic acid biosynthetic process                                |
| 4140 | GO:0120091 | Signaling and response | Signaling | F | jasmonic acid hydrolase                                           |
| 4141 | GO:0009867 | Signaling and response | Signaling | P | jasmonic acid mediated signaling pathway                          |
| 4142 | GO:0009694 | Signaling and response | Signaling | P | jasmonic acid metabolic process                                   |
| 4143 | GO:0016301 | Signaling and response | Signaling | F | kinase activity                                                   |
| 4144 | GO:0019900 | Signaling and response | Signaling | F | kinase binding                                                    |
| 4145 | GO:0019210 | Signaling and response | Signaling | F | kinase inhibitor activity                                         |
| 4146 | GO:0019207 | Signaling and response | Signaling | F | kinase regulator activity                                         |
| 4147 | GO:0048574 | Signaling and response | Signaling | P | long-day photoperiodism, flowering                                |
| 4148 | GO:0004724 | Signaling and response | Signaling | F | magnesium-dependent protein serine/threonine phosphatase activity |
| 4149 | GO:0004707 | Signaling and response | Signaling | F | MAP kinase activity                                               |
| 4150 | GO:0004708 | Signaling and response | Signaling | F | MAP kinase kinase activity                                        |
| 4151 | GO:0004709 | Signaling and response | Signaling | F | MAP kinase kinase kinase activity                                 |
| 4152 | GO:0033549 | Signaling and response | Signaling | F | MAP kinase phosphatase activity                                   |

|      |            |                        |           |   |                                                                              |
|------|------------|------------------------|-----------|---|------------------------------------------------------------------------------|
| 4153 | GO:0000165 | Signaling and response | Signaling | P | MAPK cascade                                                                 |
| 4154 | GO:0005078 | Signaling and response | Signaling | F | MAP-kinase scaffold activity                                                 |
| 4155 | GO:0080030 | Signaling and response | Signaling | F | methyl indole-3-acetate esterase activity                                    |
| 4156 | GO:0080032 | Signaling and response | Signaling | F | methyl jasmonate esterase activity                                           |
| 4157 | GO:0080031 | Signaling and response | Signaling | F | methyl salicylate esterase activity                                          |
| 4158 | GO:0031930 | Signaling and response | Signaling | P | mitochondria-nucleus signaling pathway                                       |
| 4159 | GO:0051019 | Signaling and response | Signaling | F | mitogen-activated protein kinase binding                                     |
| 4160 | GO:0031435 | Signaling and response | Signaling | F | mitogen-activated protein kinase kinase kinase binding                       |
| 4161 | GO:0032501 | Signaling and response | Signaling | P | multicellular organismal process                                             |
| 4162 | GO:0051704 | Signaling and response | Signaling | P | multi-organism process                                                       |
| 4163 | GO:0009959 | Signaling and response | Signaling | P | negative gravitropism                                                        |
| 4164 | GO:0042754 | Signaling and response | Signaling | P | negative regulation of circadian rhythm                                      |
| 4165 | GO:0009938 | Signaling and response | Signaling | P | negative regulation of gibberellic acid mediated signaling pathway           |
| 4166 | GO:1901997 | Signaling and response | Signaling | P | negative regulation of indoleacetic acid biosynthetic process via tryptophan |
| 4167 | GO:0048579 | Signaling and response | Signaling | P | negative regulation of long-day photoperiodism, flowering                    |
| 4168 | GO:0043407 | Signaling and response | Signaling | P | negative regulation of MAP kinase activity                                   |
| 4169 | GO:0010100 | Signaling and response | Signaling | P | negative regulation of photomorphogenesis                                    |
| 4170 | GO:0048577 | Signaling and response | Signaling | P | negative regulation of short-day photoperiodism, flowering                   |
| 4171 | GO:1902457 | Signaling and response | Signaling | P | negative regulation of stomatal opening                                      |
| 4172 | GO:0004715 | Signaling and response | Signaling | F | non-membrane spanning protein tyrosine kinase activity                       |
| 4173 | GO:0061608 | Signaling and response | Signaling | F | nuclear import signal receptor activity                                      |
| 4174 | GO:0004550 | Signaling and response | Signaling | F | nucleoside diphosphate kinase activity                                       |
| 4175 | GO:0005034 | Signaling and response | Signaling | F | osmosensor activity                                                          |
| 4176 | GO:0007231 | Signaling and response | Signaling | P | osmosensory signaling pathway                                                |
| 4177 | GO:0006119 | Signaling and response | Signaling | P | oxidative phosphorylation                                                    |
| 4178 | GO:0002221 | Signaling and response | Signaling | P | pattern recognition receptor signaling pathway                               |
| 4179 | GO:0017046 | Signaling and response | Signaling | F | peptide hormone binding                                                      |
| 4180 | GO:0051428 | Signaling and response | Signaling | F | peptide hormone receptor binding                                             |
| 4181 | GO:0001653 | Signaling and response | Signaling | F | peptide receptor activity                                                    |
| 4182 | GO:0018105 | Signaling and response | Signaling | P | peptidyl-serine phosphorylation                                              |
| 4183 | GO:0018107 | Signaling and response | Signaling | P | peptidyl-threonine phosphorylation                                           |
| 4184 | GO:0016791 | Signaling and response | Signaling | F | phosphatase activity                                                         |
| 4185 | GO:0019902 | Signaling and response | Signaling | F | phosphatase binding                                                          |
| 4186 | GO:0036149 | Signaling and response | Signaling | P | phosphatidylinositol acyl-chain remodeling                                   |
| 4187 | GO:0046856 | Signaling and response | Signaling | P | phosphatidylinositol dephosphorylation                                       |
| 4188 | GO:0016307 | Signaling and response | Signaling | F | phosphatidylinositol phosphate kinase activity                               |
| 4189 | GO:0052866 | Signaling and response | Signaling | F | phosphatidylinositol phosphate phosphatase activity                          |
| 4190 | GO:0004435 | Signaling and response | Signaling | F | phosphatidylinositol phospholipase C activity                                |
| 4191 | GO:0016314 | Signaling and response | Signaling | F | phosphatidylinositol-3,4,5-trisphosphate 3-phosphatase activity              |
| 4192 | GO:0034485 | Signaling and response | Signaling | F | phosphatidylinositol-3,4,5-trisphosphate 5-phosphatase activity              |
| 4193 | GO:0005547 | Signaling and response | Signaling | F | phosphatidylinositol-3,4,5-trisphosphate binding                             |
| 4194 | GO:0004439 | Signaling and response | Signaling | F | phosphatidylinositol-4,5-bisphosphate 5-phosphatase activity                 |
| 4195 | GO:0004618 | Signaling and response | Signaling | F | phosphoglycerate kinase activity                                             |
| 4196 | GO:0008967 | Signaling and response | Signaling | F | phosphoglycolate phosphatase activity                                        |
| 4197 | GO:0008970 | Signaling and response | Signaling | F | phospholipase A1 activity                                                    |
| 4198 | GO:0004623 | Signaling and response | Signaling | F | phospholipase A2 activity                                                    |
| 4199 | GO:0016004 | Signaling and response | Signaling | F | phospholipase activator activity                                             |
| 4200 | GO:0004620 | Signaling and response | Signaling | F | phospholipase activity                                                       |
| 4201 | GO:0004629 | Signaling and response | Signaling | F | phospholipase C activity                                                     |
| 4202 | GO:0046839 | Signaling and response | Signaling | P | phospholipid dephosphorylation                                               |
| 4203 | GO:0004721 | Signaling and response | Signaling | F | phosphoprotein phosphatase activity                                          |
| 4204 | GO:0000156 | Signaling and response | Signaling | F | phosphorelay response regulator activity                                     |
| 4205 | GO:0000155 | Signaling and response | Signaling | F | phosphorelay sensor kinase activity                                          |
| 4206 | GO:0000160 | Signaling and response | Signaling | P | phosphorelay signal transduction system                                      |
| 4207 | GO:0010205 | Signaling and response | Signaling | P | photoinhibition                                                              |
| 4208 | GO:0009640 | Signaling and response | Signaling | P | photomorphogenesis                                                           |
| 4209 | GO:0009648 | Signaling and response | Signaling | P | photoperiodism                                                               |
| 4210 | GO:0048573 | Signaling and response | Signaling | P | photoperiodism, flowering                                                    |
| 4211 | GO:0009881 | Signaling and response | Signaling | F | photoreceptor activity                                                       |
| 4212 | GO:0009638 | Signaling and response | Signaling | P | phototropism                                                                 |
| 4213 | GO:0009958 | Signaling and response | Signaling | P | positive gravitropism                                                        |
| 4214 | GO:0010601 | Signaling and response | Signaling | P | positive regulation of auxin biosynthetic process                            |
| 4215 | GO:0010929 | Signaling and response | Signaling | P | positive regulation of auxin mediated signaling pathway                      |
| 4216 | GO:0090355 | Signaling and response | Signaling | P | positive regulation of auxin metabolic process                               |
| 4217 | GO:2000488 | Signaling and response | Signaling | P | positive regulation of brassinosteroid biosynthetic process                  |
| 4218 | GO:0042753 | Signaling and response | Signaling | P | positive regulation of circadian rhythm                                      |
| 4219 | GO:0009939 | Signaling and response | Signaling | P | positive regulation of gibberellic acid mediated signaling pathway           |
| 4220 | GO:0048578 | Signaling and response | Signaling | P | positive regulation of long-day photoperiodism, flowering                    |
| 4221 | GO:2000306 | Signaling and response | Signaling | P | positive regulation of photomorphogenesis                                    |
| 4222 | GO:0001934 | Signaling and response | Signaling | P | positive regulation of protein phosphorylation                               |
| 4223 | GO:1902448 | Signaling and response | Signaling | P | positive regulation of shade avoidance                                       |
| 4224 | GO:0009967 | Signaling and response | Signaling | P | positive regulation of signal transduction                                   |
| 4225 | GO:0010220 | Signaling and response | Signaling | P | positive regulation of vernalization response                                |
| 4226 | GO:0046777 | Signaling and response | Signaling | P | protein autophosphorylation                                                  |
| 4227 | GO:0006470 | Signaling and response | Signaling | P | protein dephosphorylation                                                    |
| 4228 | GO:0004660 | Signaling and response | Signaling | F | protein farnesyltransferase activity                                         |
| 4229 | GO:0005965 | Signaling and response | Signaling | C | protein farnesyltransferase complex                                          |
| 4230 | GO:0030295 | Signaling and response | Signaling | F | protein kinase activator activity                                            |

|      |            |                        |           |   |                                                                          |
|------|------------|------------------------|-----------|---|--------------------------------------------------------------------------|
| 4231 | GO:0004672 | Signaling and response | Signaling | F | protein kinase activity                                                  |
| 4232 | GO:0019901 | Signaling and response | Signaling | F | protein kinase binding                                                   |
| 4233 | GO:0005080 | Signaling and response | Signaling | F | protein kinase C binding                                                 |
| 4234 | GO:1902911 | Signaling and response | Signaling | C | protein kinase complex                                                   |
| 4235 | GO:0004860 | Signaling and response | Signaling | F | protein kinase inhibitor activity                                        |
| 4236 | GO:0019887 | Signaling and response | Signaling | F | protein kinase regulator activity                                        |
| 4237 | GO:0034394 | Signaling and response | Signaling | P | protein localization to cell surface                                     |
| 4238 | GO:0072542 | Signaling and response | Signaling | F | protein phosphatase activator activity                                   |
| 4239 | GO:0004864 | Signaling and response | Signaling | F | protein phosphatase inhibitor activity                                   |
| 4240 | GO:0019888 | Signaling and response | Signaling | F | protein phosphatase regulator activity                                   |
| 4241 | GO:0000164 | Signaling and response | Signaling | C | protein phosphatase type 1 complex                                       |
| 4242 | GO:0000159 | Signaling and response | Signaling | C | protein phosphatase type 2A complex                                      |
| 4243 | GO:0045309 | Signaling and response | Signaling | F | protein phosphorylated amino acid binding                                |
| 4244 | GO:0006468 | Signaling and response | Signaling | P | protein phosphorylation                                                  |
| 4245 | GO:0004674 | Signaling and response | Signaling | F | protein serine/threonine kinase activity                                 |
| 4246 | GO:0004722 | Signaling and response | Signaling | F | protein serine/threonine phosphatase activity                            |
| 4247 | GO:0008287 | Signaling and response | Signaling | C | protein serine/threonine phosphatase complex                             |
| 4248 | GO:0004712 | Signaling and response | Signaling | F | protein serine/threonine/tyrosine kinase activity                        |
| 4249 | GO:0004713 | Signaling and response | Signaling | F | protein tyrosine kinase activity                                         |
| 4250 | GO:0004725 | Signaling and response | Signaling | F | protein tyrosine phosphatase activity                                    |
| 4251 | GO:0008138 | Signaling and response | Signaling | F | protein tyrosine/serine/threonine phosphatase activity                   |
| 4252 | GO:0047134 | Signaling and response | Signaling | F | protein-disulfide reductase activity                                     |
| 4253 | GO:0005093 | Signaling and response | Signaling | F | Rab GDP-dissociation inhibitor activity                                  |
| 4254 | GO:0004663 | Signaling and response | Signaling | F | Rab geranylgeranyltransferase activity                                   |
| 4255 | GO:0017137 | Signaling and response | Signaling | F | Rab GTPase binding                                                       |
| 4256 | GO:0017112 | Signaling and response | Signaling | F | Rab guanyl-nucleotide exchange factor activity                           |
| 4257 | GO:0032482 | Signaling and response | Signaling | P | Rab protein signal transduction                                          |
| 4258 | GO:0005968 | Signaling and response | Signaling | C | Rab-protein geranylgeranyltransferase complex                            |
| 4259 | GO:0048365 | Signaling and response | Signaling | F | Rac GTPase binding                                                       |
| 4260 | GO:0008536 | Signaling and response | Signaling | F | Ran GTPase binding                                                       |
| 4261 | GO:0043235 | Signaling and response | Signaling | C | receptor complex                                                         |
| 4262 | GO:0033612 | Signaling and response | Signaling | F | receptor serine/threonine kinase binding                                 |
| 4263 | GO:0010161 | Signaling and response | Signaling | P | red light signaling pathway                                              |
| 4264 | GO:0010017 | Signaling and response | Signaling | P | red or far-red light signaling pathway                                   |
| 4265 | GO:0009585 | Signaling and response | Signaling | P | red, far-red light phototransduction                                     |
| 4266 | GO:0010600 | Signaling and response | Signaling | P | regulation of auxin biosynthetic process                                 |
| 4267 | GO:0010928 | Signaling and response | Signaling | P | regulation of auxin mediated signaling pathway                           |
| 4268 | GO:0090354 | Signaling and response | Signaling | P | regulation of auxin metabolic process                                    |
| 4269 | GO:2000012 | Signaling and response | Signaling | P | regulation of auxin polar transport                                      |
| 4270 | GO:1900457 | Signaling and response | Signaling | P | regulation of brassinosteroid mediated signaling pathway                 |
| 4271 | GO:0042752 | Signaling and response | Signaling | P | regulation of circadian rhythm                                           |
| 4272 | GO:0000079 | Signaling and response | Signaling | P | regulation of cyclin-dependent protein serine/threonine kinase activity  |
| 4273 | GO:0080036 | Signaling and response | Signaling | P | regulation of cytokinin-activated signaling pathway                      |
| 4274 | GO:0009937 | Signaling and response | Signaling | P | regulation of gibberellic acid mediated signaling pathway                |
| 4275 | GO:0010371 | Signaling and response | Signaling | P | regulation of gibberellin biosynthetic process                           |
| 4276 | GO:0043087 | Signaling and response | Signaling | P | regulation of GTPase activity                                            |
| 4277 | GO:0080141 | Signaling and response | Signaling | P | regulation of jasmonic acid biosynthetic process                         |
| 4278 | GO:2000022 | Signaling and response | Signaling | P | regulation of jasmonic acid mediated signaling pathway                   |
| 4279 | GO:0043549 | Signaling and response | Signaling | P | regulation of kinase activity                                            |
| 4280 | GO:0048586 | Signaling and response | Signaling | P | regulation of long-day photoperiodism, flowering                         |
| 4281 | GO:0010921 | Signaling and response | Signaling | P | regulation of phosphatase activity                                       |
| 4282 | GO:0042325 | Signaling and response | Signaling | P | regulation of phosphorylation                                            |
| 4283 | GO:0010099 | Signaling and response | Signaling | P | regulation of photomorphogenesis                                         |
| 4284 | GO:2000028 | Signaling and response | Signaling | P | regulation of photoperiodism, flowering                                  |
| 4285 | GO:0031952 | Signaling and response | Signaling | P | regulation of protein autophosphorylation                                |
| 4286 | GO:0035304 | Signaling and response | Signaling | P | regulation of protein dephosphorylation                                  |
| 4287 | GO:0045859 | Signaling and response | Signaling | P | regulation of protein kinase activity                                    |
| 4288 | GO:0001932 | Signaling and response | Signaling | P | regulation of protein phosphorylation                                    |
| 4289 | GO:0071900 | Signaling and response | Signaling | P | regulation of protein serine/threonine kinase activity                   |
| 4290 | GO:0080163 | Signaling and response | Signaling | P | regulation of protein serine/threonine phosphatase activity              |
| 4291 | GO:2000030 | Signaling and response | Signaling | P | regulation of response to red or far red light                           |
| 4292 | GO:2000280 | Signaling and response | Signaling | P | regulation of root development                                           |
| 4293 | GO:2000067 | Signaling and response | Signaling | P | regulation of root morphogenesis                                         |
| 4294 | GO:0080142 | Signaling and response | Signaling | P | regulation of salicylic acid biosynthetic process                        |
| 4295 | GO:2000031 | Signaling and response | Signaling | P | regulation of salicylic acid mediated signaling pathway                  |
| 4296 | GO:0010029 | Signaling and response | Signaling | P | regulation of seed germination                                           |
| 4297 | GO:0048510 | Signaling and response | Signaling | P | regulation of timing of transition from vegetative to reproductive phase |
| 4298 | GO:0010321 | Signaling and response | Signaling | P | regulation of vegetative phase change                                    |
| 4299 | GO:0060320 | Signaling and response | Signaling | P | rejection of self pollen                                                 |
| 4300 | GO:0048838 | Signaling and response | Signaling | P | release of seed from dormancy                                            |
| 4301 | GO:0009961 | Signaling and response | Signaling | P | response to 1-aminocyclopropane-1-carboxylic acid                        |
| 4302 | GO:0009628 | Signaling and response | Signaling | P | response to abiotic stimulus                                             |
| 4303 | GO:0001101 | Signaling and response | Signaling | P | response to acid chemical                                                |
| 4304 | GO:0010044 | Signaling and response | Signaling | P | response to aluminum ion                                                 |
| 4305 | GO:0072722 | Signaling and response | Signaling | P | response to amitrole                                                     |
| 4306 | GO:0060359 | Signaling and response | Signaling | P | response to ammonium ion                                                 |
| 4307 | GO:0009733 | Signaling and response | Signaling | P | response to auxin                                                        |
| 4308 | GO:0009617 | Signaling and response | Signaling | P | response to bacterium                                                    |

|      |            |                        |           |   |                                                                       |
|------|------------|------------------------|-----------|---|-----------------------------------------------------------------------|
| 4309 | GO:0009607 | Signaling and response | Signaling | P | response to biotic stimulus                                           |
| 4310 | GO:0009637 | Signaling and response | Signaling | P | response to blue light                                                |
| 4311 | GO:0010036 | Signaling and response | Signaling | P | response to boron-containing substance                                |
| 4312 | GO:0009741 | Signaling and response | Signaling | P | response to brassinosteroid                                           |
| 4313 | GO:0046686 | Signaling and response | Signaling | P | response to cadmium ion                                               |
| 4314 | GO:0051592 | Signaling and response | Signaling | P | response to calcium ion                                               |
| 4315 | GO:0009743 | Signaling and response | Signaling | P | response to carbohydrate                                              |
| 4316 | GO:0010037 | Signaling and response | Signaling | P | response to carbon dioxide                                            |
| 4317 | GO:0042221 | Signaling and response | Signaling | P | response to chemical                                                  |
| 4318 | GO:0010200 | Signaling and response | Signaling | P | response to chitin                                                    |
| 4319 | GO:0032025 | Signaling and response | Signaling | P | response to cobalt ion                                                |
| 4320 | GO:0046688 | Signaling and response | Signaling | P | response to copper ion                                                |
| 4321 | GO:0009735 | Signaling and response | Signaling | P | response to cytokinin                                                 |
| 4322 | GO:0034285 | Signaling and response | Signaling | P | response to disaccharide                                              |
| 4323 | GO:0009719 | Signaling and response | Signaling | P | response to endogenous stimulus                                       |
| 4324 | GO:0043207 | Signaling and response | Signaling | P | response to external biotic stimulus                                  |
| 4325 | GO:0009605 | Signaling and response | Signaling | P | response to external stimulus                                         |
| 4326 | GO:0009991 | Signaling and response | Signaling | P | response to extracellular stimulus                                    |
| 4327 | GO:0010218 | Signaling and response | Signaling | P | response to far red light                                             |
| 4328 | GO:0009750 | Signaling and response | Signaling | P | response to fructose                                                  |
| 4329 | GO:0009739 | Signaling and response | Signaling | P | response to gibberellin                                               |
| 4330 | GO:0009749 | Signaling and response | Signaling | P | response to glucose                                                   |
| 4331 | GO:0009629 | Signaling and response | Signaling | P | response to gravity                                                   |
| 4332 | GO:0060416 | Signaling and response | Signaling | P | response to growth hormone                                            |
| 4333 | GO:0009725 | Signaling and response | Signaling | P | response to hormone                                                   |
| 4334 | GO:0010035 | Signaling and response | Signaling | P | response to inorganic substance                                       |
| 4335 | GO:0010212 | Signaling and response | Signaling | P | response to ionizing radiation                                        |
| 4336 | GO:0010039 | Signaling and response | Signaling | P | response to iron ion                                                  |
| 4337 | GO:0009753 | Signaling and response | Signaling | P | response to jasmonic acid                                             |
| 4338 | GO:0080167 | Signaling and response | Signaling | P | response to karrikin                                                  |
| 4339 | GO:1902065 | Signaling and response | Signaling | P | response to L-glutamate                                               |
| 4340 | GO:0009642 | Signaling and response | Signaling | P | response to light intensity                                           |
| 4341 | GO:0009416 | Signaling and response | Signaling | P | response to light stimulus                                            |
| 4342 | GO:0033993 | Signaling and response | Signaling | P | response to lipid                                                     |
| 4343 | GO:0010555 | Signaling and response | Signaling | P | response to mannitol                                                  |
| 4344 | GO:1905582 | Signaling and response | Signaling | P | response to mannose                                                   |
| 4345 | GO:0010038 | Signaling and response | Signaling | P | response to metal ion                                                 |
| 4346 | GO:0010167 | Signaling and response | Signaling | P | response to nitrate                                                   |
| 4347 | GO:1901698 | Signaling and response | Signaling | P | response to nitrogen compound                                         |
| 4348 | GO:0007584 | Signaling and response | Signaling | P | response to nutrient                                                  |
| 4349 | GO:0031667 | Signaling and response | Signaling | P | response to nutrient levels                                           |
| 4350 | GO:0014070 | Signaling and response | Signaling | P | response to organic cyclic compound                                   |
| 4351 | GO:0010033 | Signaling and response | Signaling | P | response to organic substance                                         |
| 4352 | GO:0010243 | Signaling and response | Signaling | P | response to organonitrogen compound                                   |
| 4353 | GO:0070482 | Signaling and response | Signaling | P | response to oxygen levels                                             |
| 4354 | GO:1901700 | Signaling and response | Signaling | P | response to oxygen-containing compound                                |
| 4355 | GO:0080184 | Signaling and response | Signaling | P | response to phenylpropanoid                                           |
| 4356 | GO:0019236 | Signaling and response | Signaling | P | response to pheromone                                                 |
| 4357 | GO:0010114 | Signaling and response | Signaling | P | response to red light                                                 |
| 4358 | GO:0009639 | Signaling and response | Signaling | P | response to red or far red light                                      |
| 4359 | GO:0009751 | Signaling and response | Signaling | P | response to salicylic acid                                            |
| 4360 | GO:0010272 | Signaling and response | Signaling | P | response to silver ion                                                |
| 4361 | GO:0072708 | Signaling and response | Signaling | P | response to sorbitol                                                  |
| 4362 | GO:0050896 | Signaling and response | Signaling | P | response to stimulus                                                  |
| 4363 | GO:1902347 | Signaling and response | Signaling | P | response to strigolactone                                             |
| 4364 | GO:0009744 | Signaling and response | Signaling | P | response to sucrose                                                   |
| 4365 | GO:0009266 | Signaling and response | Signaling | P | response to temperature stimulus                                      |
| 4366 | GO:0009411 | Signaling and response | Signaling | P | response to UV                                                        |
| 4367 | GO:0070141 | Signaling and response | Signaling | P | response to UV-A                                                      |
| 4368 | GO:0010225 | Signaling and response | Signaling | P | response to UV-C                                                      |
| 4369 | GO:0010266 | Signaling and response | Signaling | P | response to vitamin B1                                                |
| 4370 | GO:0009415 | Signaling and response | Signaling | P | response to water                                                     |
| 4371 | GO:0010043 | Signaling and response | Signaling | P | response to zinc ion                                                  |
| 4372 | GO:0030970 | Signaling and response | Signaling | P | retrograde protein transport, ER to cytosol                           |
| 4373 | GO:0042147 | Signaling and response | Signaling | P | retrograde transport, endosome to Golgi                               |
| 4374 | GO:0006890 | Signaling and response | Signaling | P | retrograde vesicle-mediated transport, Golgi to endoplasmic reticulum |
| 4375 | GO:0007266 | Signaling and response | Signaling | P | Rho protein signal transduction                                       |
| 4376 | GO:0048511 | Signaling and response | Signaling | P | rhythmic process                                                      |
| 4377 | GO:0009697 | Signaling and response | Signaling | P | salicylic acid biosynthetic process                                   |
| 4378 | GO:0052639 | Signaling and response | Signaling | F | salicylic acid glucosyltransferase (ester-forming) activity           |
| 4379 | GO:0052640 | Signaling and response | Signaling | F | salicylic acid glucosyltransferase (glucoside-forming) activity       |
| 4380 | GO:0009863 | Signaling and response | Signaling | P | salicylic acid mediated signaling pathway                             |
| 4381 | GO:0009696 | Signaling and response | Signaling | P | salicylic acid metabolic process                                      |
| 4382 | GO:1902554 | Signaling and response | Signaling | C | serine/threonine protein kinase complex                               |
| 4383 | GO:0009641 | Signaling and response | Signaling | P | shade avoidance                                                       |
| 4384 | GO:0048575 | Signaling and response | Signaling | P | short-day photoperiodism, flowering                                   |
| 4385 | GO:0005787 | Signaling and response | Signaling | C | signal peptidase complex                                              |
| 4386 | GO:0006465 | Signaling and response | Signaling | P | signal peptide processing                                             |



|      |            |                        |           |   |                                                                             |
|------|------------|------------------------|-----------|---|-----------------------------------------------------------------------------|
| 4387 | GO:0005047 | Signaling and response | Signaling | F | signal recognition particle binding                                         |
| 4388 | GO:0005785 | Signaling and response | Signaling | C | signal recognition particle receptor complex                                |
| 4389 | GO:0005048 | Signaling and response | Signaling | F | signal sequence binding                                                     |
| 4390 | GO:0007165 | Signaling and response | Signaling | P | signal transduction                                                         |
| 4391 | GO:0023014 | Signaling and response | Signaling | P | signal transduction by protein phosphorylation                              |
| 4392 | GO:0038023 | Signaling and response | Signaling | F | signaling receptor activity                                                 |
| 4393 | GO:0005102 | Signaling and response | Signaling | F | signaling receptor binding                                                  |
| 4394 | GO:0007264 | Signaling and response | Signaling | P | small GTPase mediated signal transduction                                   |
| 4395 | GO:0010012 | Signaling and response | Signaling | F | steroid 22-alpha hydroxylase activity                                       |
| 4396 | GO:0005496 | Signaling and response | Signaling | F | steroid binding                                                             |
| 4397 | GO:0016229 | Signaling and response | Signaling | F | steroid dehydrogenase activity                                              |
| 4398 | GO:0008395 | Signaling and response | Signaling | F | steroid hydroxylase activity                                                |
| 4399 | GO:0003838 | Signaling and response | Signaling | F | sterol 24-C-methyltransferase activity                                      |
| 4400 | GO:0032934 | Signaling and response | Signaling | F | sterol binding                                                              |
| 4401 | GO:0016126 | Signaling and response | Signaling | P | sterol biosynthetic process                                                 |
| 4402 | GO:0016125 | Signaling and response | Signaling | P | sterol metabolic process                                                    |
| 4403 | GO:0015918 | Signaling and response | Signaling | P | sterol transport                                                            |
| 4404 | GO:0047012 | Signaling and response | Signaling | F | sterol-4-alpha-carboxylate 3-dehydrogenase (decarboxylating) activity       |
| 4405 | GO:0010118 | Signaling and response | Signaling | P | stomatal movement                                                           |
| 4406 | GO:0010182 | Signaling and response | Signaling | P | sugar mediated signaling pathway                                            |
| 4407 | GO:0044403 | Signaling and response | Signaling | P | symbiotic process                                                           |
| 4408 | GO:0042330 | Signaling and response | Signaling | P | taxis                                                                       |
| 4409 | GO:0009652 | Signaling and response | Signaling | P | thigmotropism                                                               |
| 4410 | GO:0019199 | Signaling and response | Signaling | F | transmembrane receptor protein kinase activity                              |
| 4411 | GO:0004714 | Signaling and response | Signaling | F | transmembrane receptor protein tyrosine kinase activity                     |
| 4412 | GO:0009606 | Signaling and response | Signaling | P | tropism                                                                     |
| 4413 | GO:0010050 | Signaling and response | Signaling | P | vegetative phase change                                                     |
| 4414 | GO:0010295 | Signaling and response | Stress    | F | (+)-abscisic acid 8'-hydroxylase activity                                   |
| 4415 | GO:1902418 | Signaling and response | Stress    | P | (+)-abscisic acid D-glucopyranosyl ester transmembrane transport            |
| 4416 | GO:1902417 | Signaling and response | Stress    | F | (+)-abscisic acid D-glucopyranosyl ester transmembrane transporter activity |
| 4417 | GO:0001872 | Signaling and response | Stress    | F | (1->3)-beta-D-glucan binding                                                |
| 4418 | GO:0006075 | Signaling and response | Stress    | P | (1->3)-beta-D-glucan biosynthetic process                                   |
| 4419 | GO:0003843 | Signaling and response | Stress    | F | 1,3-beta-D-glucan synthase activity                                         |
| 4420 | GO:0000148 | Signaling and response | Stress    | C | 1,3-beta-D-glucan synthase complex                                          |
| 4421 | GO:0010427 | Signaling and response | Stress    | F | abscisic acid binding                                                       |
| 4422 | GO:0009688 | Signaling and response | Stress    | P | abscisic acid biosynthetic process                                          |
| 4423 | GO:0046345 | Signaling and response | Stress    | P | abscisic acid catabolic process                                             |
| 4424 | GO:0010294 | Signaling and response | Stress    | F | abscisic acid glucosyltransferase activity                                  |
| 4425 | GO:0009687 | Signaling and response | Stress    | P | abscisic acid metabolic process                                             |
| 4426 | GO:0080168 | Signaling and response | Stress    | P | abscisic acid transport                                                     |
| 4427 | GO:0009738 | Signaling and response | Stress    | P | abscisic acid-activated signaling pathway                                   |
| 4428 | GO:0033741 | Signaling and response | Stress    | F | adenylyl-sulfate reductase (glutathione) activity                           |
| 4429 | GO:0007568 | Signaling and response | Stress    | P | aging                                                                       |
| 4430 | GO:0009916 | Signaling and response | Stress    | F | alternative oxidase activity                                                |
| 4431 | GO:0010230 | Signaling and response | Stress    | P | alternative respiration                                                     |
| 4432 | GO:0080144 | Signaling and response | Stress    | P | amino acid homeostasis                                                      |
| 4433 | GO:0055081 | Signaling and response | Stress    | P | anion homeostasis                                                           |
| 4434 | GO:0016209 | Signaling and response | Stress    | F | antioxidant activity                                                        |
| 4435 | GO:1901683 | Signaling and response | Stress    | F | arsenate ion transmembrane transporter activity                             |
| 4436 | GO:0015105 | Signaling and response | Stress    | F | arsenite transmembrane transporter activity                                 |
| 4437 | GO:0015700 | Signaling and response | Stress    | P | arsenite transport                                                          |
| 4438 | GO:0061574 | Signaling and response | Stress    | C | ASAP complex                                                                |
| 4439 | GO:0010252 | Signaling and response | Stress    | P | auxin homeostasis                                                           |
| 4440 | GO:0010268 | Signaling and response | Stress    | P | brassinosteroid homeostasis                                                 |
| 4441 | GO:0080120 | Signaling and response | Stress    | P | CAAX-box protein maturation                                                 |
| 4442 | GO:0071586 | Signaling and response | Stress    | P | CAAX-box protein processing                                                 |
| 4443 | GO:0004662 | Signaling and response | Stress    | F | CAAX-protein geranylgeranyltransferase activity                             |
| 4444 | GO:0005953 | Signaling and response | Stress    | C | CAAX-protein geranylgeranyltransferase complex                              |
| 4445 | GO:0055073 | Signaling and response | Stress    | P | cadmium ion homeostasis                                                     |
| 4446 | GO:0005227 | Signaling and response | Stress    | F | calcium activated cation channel activity                                   |
| 4447 | GO:0005262 | Signaling and response | Stress    | F | calcium channel activity                                                    |
| 4448 | GO:0015368 | Signaling and response | Stress    | F | calcium:cation antiporter activity                                          |
| 4449 | GO:0015369 | Signaling and response | Stress    | F | calcium:proton antiporter activity                                          |
| 4450 | GO:0005432 | Signaling and response | Stress    | F | calcium:sodium antiporter activity                                          |
| 4451 | GO:0005544 | Signaling and response | Stress    | F | calcium-dependent phospholipid binding                                      |
| 4452 | GO:0052543 | Signaling and response | Stress    | P | callose deposition in cell wall                                             |
| 4453 | GO:0033500 | Signaling and response | Stress    | P | carbohydrate homeostasis                                                    |
| 4454 | GO:0004096 | Signaling and response | Stress    | F | catalase activity                                                           |
| 4455 | GO:0055080 | Signaling and response | Stress    | P | cation homeostasis                                                          |
| 4456 | GO:0045454 | Signaling and response | Stress    | P | cell redox homeostasis                                                      |
| 4457 | GO:0006884 | Signaling and response | Stress    | P | cell volume homeostasis                                                     |
| 4458 | GO:0006876 | Signaling and response | Stress    | P | cellular cadmium ion homeostasis                                            |
| 4459 | GO:0006874 | Signaling and response | Stress    | P | cellular calcium ion homeostasis                                            |
| 4460 | GO:0030003 | Signaling and response | Stress    | P | cellular cation homeostasis                                                 |
| 4461 | GO:0055082 | Signaling and response | Stress    | P | cellular chemical homeostasis                                               |
| 4462 | GO:0006878 | Signaling and response | Stress    | P | cellular copper ion homeostasis                                             |
| 4463 | GO:1990748 | Signaling and response | Stress    | P | cellular detoxification                                                     |
| 4464 | GO:0070370 | Signaling and response | Stress    | P | cellular heat acclimation                                                   |

|      |            |                        |        |   |                                                                 |
|------|------------|------------------------|--------|---|-----------------------------------------------------------------|
| 4465 | GO:0019725 | Signaling and response | Stress | P | cellular homeostasis                                            |
| 4466 | GO:0006873 | Signaling and response | Stress | P | cellular ion homeostasis                                        |
| 4467 | GO:0006879 | Signaling and response | Stress | P | cellular iron ion homeostasis                                   |
| 4468 | GO:0030026 | Signaling and response | Stress | P | cellular manganese ion homeostasis                              |
| 4469 | GO:0006875 | Signaling and response | Stress | P | cellular metal ion homeostasis                                  |
| 4470 | GO:0030004 | Signaling and response | Stress | P | cellular monovalent inorganic cation homeostasis                |
| 4471 | GO:0098869 | Signaling and response | Stress | P | cellular oxidant detoxification                                 |
| 4472 | GO:0030643 | Signaling and response | Stress | P | cellular phosphate ion homeostasis                              |
| 4473 | GO:0071215 | Signaling and response | Stress | P | cellular response to abscisic acid stimulus                     |
| 4474 | GO:0071485 | Signaling and response | Stress | P | cellular response to absence of light                           |
| 4475 | GO:0071454 | Signaling and response | Stress | P | cellular response to anoxia                                     |
| 4476 | GO:0062197 | Signaling and response | Stress | P | cellular response to chemical stress                            |
| 4477 | GO:0036294 | Signaling and response | Stress | P | cellular response to decreased oxygen levels                    |
| 4478 | GO:0006974 | Signaling and response | Stress | P | cellular response to DNA damage stimulus                        |
| 4479 | GO:0071369 | Signaling and response | Stress | P | cellular response to ethylene stimulus                          |
| 4480 | GO:0071217 | Signaling and response | Stress | P | cellular response to external biotic stimulus                   |
| 4481 | GO:0034605 | Signaling and response | Stress | P | cellular response to heat                                       |
| 4482 | GO:0071486 | Signaling and response | Stress | P | cellular response to high light intensity                       |
| 4483 | GO:0070301 | Signaling and response | Stress | P | cellular response to hydrogen peroxide                          |
| 4484 | GO:0071456 | Signaling and response | Stress | P | cellular response to hypoxia                                    |
| 4485 | GO:0071484 | Signaling and response | Stress | P | cellular response to light intensity                            |
| 4486 | GO:0071219 | Signaling and response | Stress | P | cellular response to molecule of bacterial origin               |
| 4487 | GO:0071732 | Signaling and response | Stress | P | cellular response to nitric oxide                               |
| 4488 | GO:0006995 | Signaling and response | Stress | P | cellular response to nitrogen starvation                        |
| 4489 | GO:0071470 | Signaling and response | Stress | P | cellular response to osmotic stress                             |
| 4490 | GO:0034599 | Signaling and response | Stress | P | cellular response to oxidative stress                           |
| 4491 | GO:0071450 | Signaling and response | Stress | P | cellular response to oxygen radical                             |
| 4492 | GO:0071457 | Signaling and response | Stress | P | cellular response to ozone                                      |
| 4493 | GO:0016036 | Signaling and response | Stress | P | cellular response to phosphate starvation                       |
| 4494 | GO:0051365 | Signaling and response | Stress | P | cellular response to potassium ion starvation                   |
| 4495 | GO:0034614 | Signaling and response | Stress | P | cellular response to reactive oxygen species                    |
| 4496 | GO:0071461 | Signaling and response | Stress | P | cellular response to redox state                                |
| 4497 | GO:0071472 | Signaling and response | Stress | P | cellular response to salt stress                                |
| 4498 | GO:0009267 | Signaling and response | Stress | P | cellular response to starvation                                 |
| 4499 | GO:0033554 | Signaling and response | Stress | P | cellular response to stress                                     |
| 4500 | GO:0009970 | Signaling and response | Stress | P | cellular response to sulfate starvation                         |
| 4501 | GO:0071451 | Signaling and response | Stress | P | cellular response to superoxide                                 |
| 4502 | GO:0097237 | Signaling and response | Stress | P | cellular response to toxic substance                            |
| 4503 | GO:0034620 | Signaling and response | Stress | P | cellular response to unfolded protein                           |
| 4504 | GO:0071492 | Signaling and response | Stress | P | cellular response to UV-A                                       |
| 4505 | GO:0071493 | Signaling and response | Stress | P | cellular response to UV-B                                       |
| 4506 | GO:0042631 | Signaling and response | Stress | P | cellular response to water deprivation                          |
| 4507 | GO:0090156 | Signaling and response | Stress | P | cellular sphingolipid homeostasis                               |
| 4508 | GO:0006882 | Signaling and response | Stress | P | cellular zinc ion homeostasis                                   |
| 4509 | GO:0051085 | Signaling and response | Stress | P | chaperone cofactor-dependent protein refolding                  |
| 4510 | GO:0048878 | Signaling and response | Stress | P | chemical homeostasis                                            |
| 4511 | GO:0009631 | Signaling and response | Stress | P | cold acclimation                                                |
| 4512 | GO:0055070 | Signaling and response | Stress | P | copper ion homeostasis                                          |
| 4513 | GO:0004869 | Signaling and response | Stress | F | cysteine-type endopeptidase inhibitor activity                  |
| 4514 | GO:0010494 | Signaling and response | Stress | C | cytoplasmic stress granule                                      |
| 4515 | GO:0003684 | Signaling and response | Stress | F | damaged DNA binding                                             |
| 4516 | GO:0006952 | Signaling and response | Stress | P | defense response                                                |
| 4517 | GO:0052542 | Signaling and response | Stress | P | defense response by callose deposition                          |
| 4518 | GO:0052544 | Signaling and response | Stress | P | defense response by callose deposition in cell wall             |
| 4519 | GO:0009870 | Signaling and response | Stress | P | defense response signaling pathway, resistance gene-dependent   |
| 4520 | GO:0010204 | Signaling and response | Stress | P | defense response signaling pathway, resistance gene-independent |
| 4521 | GO:0042742 | Signaling and response | Stress | P | defense response to bacterium                                   |
| 4522 | GO:0009816 | Signaling and response | Stress | P | defense response to bacterium, incompatible interaction         |
| 4523 | GO:0050832 | Signaling and response | Stress | P | defense response to fungus                                      |
| 4524 | GO:0009817 | Signaling and response | Stress | P | defense response to fungus, incompatible interaction            |
| 4525 | GO:0050829 | Signaling and response | Stress | P | defense response to Gram-negative bacterium                     |
| 4526 | GO:0002213 | Signaling and response | Stress | P | defense response to insect                                      |
| 4527 | GO:0002229 | Signaling and response | Stress | P | defense response to oomycetes                                   |
| 4528 | GO:0098542 | Signaling and response | Stress | P | defense response to other organism                              |
| 4529 | GO:0051607 | Signaling and response | Stress | P | defense response to virus                                       |
| 4530 | GO:0009814 | Signaling and response | Stress | P | defense response, incompatible interaction                      |
| 4531 | GO:0036513 | Signaling and response | Stress | C | Derlin-1 retrotranslocation complex                             |
| 4532 | GO:0016045 | Signaling and response | Stress | P | detection of bacterium                                          |
| 4533 | GO:0009727 | Signaling and response | Stress | P | detection of ethylene stimulus                                  |
| 4534 | GO:0098754 | Signaling and response | Stress | P | detoxification                                                  |
| 4535 | GO:0071585 | Signaling and response | Stress | P | detoxification of cadmium ion                                   |
| 4536 | GO:0010273 | Signaling and response | Stress | P | detoxification of copper ion                                    |
| 4537 | GO:0072505 | Signaling and response | Stress | P | divalent inorganic anion homeostasis                            |
| 4538 | GO:0009819 | Signaling and response | Stress | P | drought recovery                                                |
| 4539 | GO:0009368 | Signaling and response | Stress | C | endopeptidase Clp complex                                       |
| 4540 | GO:0030968 | Signaling and response | Stress | P | endoplasmic reticulum unfolded protein response                 |
| 4541 | GO:0006983 | Signaling and response | Stress | P | ER overload response                                            |
| 4542 | GO:0051740 | Signaling and response | Stress | F | ethylene binding                                                |

|      |            |                        |        |   |                                                                                  |
|------|------------|------------------------|--------|---|----------------------------------------------------------------------------------|
| 4543 | GO:0009693 | Signaling and response | Stress | P | ethylene biosynthetic process                                                    |
| 4544 | GO:0038199 | Signaling and response | Stress | F | ethylene receptor activity                                                       |
| 4545 | GO:0009873 | Signaling and response | Stress | P | ethylene-activated signaling pathway                                             |
| 4546 | GO:0055089 | Signaling and response | Stress | P | fatty acid homeostasis                                                           |
| 4547 | GO:0030385 | Signaling and response | Stress | F | ferredoxin:thioredoxin reductase activity                                        |
| 4548 | GO:0048307 | Signaling and response | Stress | F | ferredoxin-nitrite reductase activity                                            |
| 4549 | GO:0103012 | Signaling and response | Stress | F | ferredoxin-thioredoxin reductase activity                                        |
| 4550 | GO:0009813 | Signaling and response | Stress | P | flavonoid biosynthetic process                                                   |
| 4551 | GO:0009812 | Signaling and response | Stress | P | flavonoid metabolic process                                                      |
| 4552 | GO:0051555 | Signaling and response | Stress | P | flavonol biosynthetic process                                                    |
|      |            |                        |        |   | formation by symbiont of syncytium involving giant cell for nutrient acquisition |
| 4553 | GO:0052096 | Signaling and response | Stress | P | from host                                                                        |
| 4554 | GO:0010336 | Signaling and response | Stress | P | gibberellic acid homeostasis                                                     |
| 4555 | GO:0042973 | Signaling and response | Stress | F | glucan endo-1,3-beta-D-glucosidase activity                                      |
| 4556 | GO:0042593 | Signaling and response | Stress | P | glucose homeostasis                                                              |
| 4557 | GO:0043295 | Signaling and response | Stress | F | glutathione binding                                                              |
| 4558 | GO:0006750 | Signaling and response | Stress | P | glutathione biosynthetic process                                                 |
| 4559 | GO:0045174 | Signaling and response | Stress | F | glutathione dehydrogenase (ascorbate) activity                                   |
| 4560 | GO:0016756 | Signaling and response | Stress | F | glutathione gamma-glutamylcysteinyltransferase activity                          |
| 4561 | GO:0036374 | Signaling and response | Stress | F | glutathione hydrolase activity                                                   |
| 4562 | GO:0006749 | Signaling and response | Stress | P | glutathione metabolic process                                                    |
| 4563 | GO:0004602 | Signaling and response | Stress | F | glutathione peroxidase activity                                                  |
| 4564 | GO:0004363 | Signaling and response | Stress | F | glutathione synthase activity                                                    |
| 4565 | GO:0004364 | Signaling and response | Stress | F | glutathione transferase activity                                                 |
| 4566 | GO:0034635 | Signaling and response | Stress | P | glutathione transport                                                            |
| 4567 | GO:0004362 | Signaling and response | Stress | F | glutathione-disulfide reductase activity                                         |
| 4568 | GO:0010235 | Signaling and response | Stress | P | guard mother cell cytokinesis                                                    |
| 4569 | GO:0010286 | Signaling and response | Stress | P | heat acclimation                                                                 |
| 4570 | GO:0031072 | Signaling and response | Stress | F | heat shock protein binding                                                       |
| 4571 | GO:0042592 | Signaling and response | Stress | P | homeostatic process                                                              |
| 4572 | GO:0080034 | Signaling and response | Stress | P | host response to induction by symbiont of tumor, nodule or growth in host        |
| 4573 | GO:0000839 | Signaling and response | Stress | C | Hrd1p ubiquitin ligase ERAD-L complex                                            |
| 4574 | GO:0051879 | Signaling and response | Stress | F | Hsp90 protein binding                                                            |
| 4575 | GO:0050665 | Signaling and response | Stress | P | hydrogen peroxide biosynthetic process                                           |
| 4576 | GO:0042744 | Signaling and response | Stress | P | hydrogen peroxide catabolic process                                              |
| 4577 | GO:0042743 | Signaling and response | Stress | P | hydrogen peroxide metabolic process                                              |
| 4578 | GO:0080170 | Signaling and response | Stress | P | hydrogen peroxide transmembrane transport                                        |
| 4579 | GO:0047987 | Signaling and response | Stress | F | hydroperoxide dehydratase activity                                               |
| 4580 | GO:0004416 | Signaling and response | Stress | F | hydroxyacylglutathione hydrolase activity                                        |
| 4581 | GO:0006972 | Signaling and response | Stress | P | hyperosmotic response                                                            |
| 4582 | GO:0042538 | Signaling and response | Stress | P | hyperosmotic salinity response                                                   |
| 4583 | GO:0042539 | Signaling and response | Stress | P | hypotonic salinity response                                                      |
| 4584 | GO:0006955 | Signaling and response | Stress | P | immune response                                                                  |
| 4585 | GO:0002376 | Signaling and response | Stress | P | immune system process                                                            |
| 4586 | GO:0046217 | Signaling and response | Stress | P | indole phytoalexin metabolic process                                             |
| 4587 | GO:0009682 | Signaling and response | Stress | P | induced systemic resistance                                                      |
| 4588 | GO:0045087 | Signaling and response | Stress | P | innate immune response                                                           |
| 4589 | GO:0098771 | Signaling and response | Stress | P | inorganic ion homeostasis                                                        |
| 4590 | GO:0050113 | Signaling and response | Stress | F | inositol oxygenase activity                                                      |
| 4591 | GO:0052658 | Signaling and response | Stress | F | inositol-1,4,5-trisphosphate 5-phosphatase activity                              |
| 4592 | GO:0051701 | Signaling and response | Stress | P | interaction with host                                                            |
| 4593 | GO:0044419 | Signaling and response | Stress | P | interspecies interaction between organisms                                       |
| 4594 | GO:0050801 | Signaling and response | Stress | P | ion homeostasis                                                                  |
| 4595 | GO:0055072 | Signaling and response | Stress | P | iron ion homeostasis                                                             |
| 4596 | GO:0009861 | Signaling and response | Stress | P | jasmonic acid and ethylene-dependent systemic resistance                         |
|      |            |                        |        |   | jasmonic acid and ethylene-dependent systemic resistance, ethylene mediated      |
| 4597 | GO:0009871 | Signaling and response | Stress | P | signaling pathway                                                                |
|      |            |                        |        |   | jasmonic acid and ethylene-dependent systemic resistance, jasmonic acid          |
| 4598 | GO:0009868 | Signaling and response | Stress | P | mediated signaling pathway                                                       |
| 4599 | GO:0031640 | Signaling and response | Stress | P | killing of cells of other organism                                               |
| 4600 | GO:0004462 | Signaling and response | Stress | F | lactoylglutathione lyase activity                                                |
| 4601 | GO:0016688 | Signaling and response | Stress | F | L-ascorbate peroxidase activity                                                  |
| 4602 | GO:0031418 | Signaling and response | Stress | F | L-ascorbic acid binding                                                          |
| 4603 | GO:0019853 | Signaling and response | Stress | P | L-ascorbic acid biosynthetic process                                             |
| 4604 | GO:0055088 | Signaling and response | Stress | P | lipid homeostasis                                                                |
| 4605 | GO:0055071 | Signaling and response | Stress | P | manganese ion homeostasis                                                        |
| 4606 | GO:0055065 | Signaling and response | Stress | P | metal ion homeostasis                                                            |
| 4607 | GO:0019243 | Signaling and response | Stress | P | methylglyoxal catabolic process to D-lactate via S-lactoyl-glutathione           |
| 4608 | GO:0010587 | Signaling and response | Stress | P | miRNA catabolic process                                                          |
| 4609 | GO:0051787 | Signaling and response | Stress | F | misfolded protein binding                                                        |
| 4610 | GO:0051560 | Signaling and response | Stress | P | mitochondrial calcium ion homeostasis                                            |
| 4611 | GO:0044003 | Signaling and response | Stress | P | modulation by symbiont of host process                                           |
| 4612 | GO:0035821 | Signaling and response | Stress | P | modulation of process of other organism                                          |
| 4613 | GO:0051817 | Signaling and response | Stress | P | modulation of process of other organism involved in symbiotic interaction        |
| 4614 | GO:0016656 | Signaling and response | Stress | F | monodehydroascorbate reductase (NADH) activity                                   |
| 4615 | GO:0055083 | Signaling and response | Stress | P | monovalent inorganic anion homeostasis                                           |
| 4616 | GO:0055067 | Signaling and response | Stress | P | monovalent inorganic cation homeostasis                                          |
| 4617 | GO:0031990 | Signaling and response | Stress | P | mRNA export from nucleus in response to heat stress                              |

|      |            |                        |        |   |                                                                                |
|------|------------|------------------------|--------|---|--------------------------------------------------------------------------------|
| 4618 | GO:0060586 | Signaling and response | Stress | P | multicellular organismal iron ion homeostasis                                  |
| 4619 | GO:0090359 | Signaling and response | Stress | P | negative regulation of abscisic acid biosynthetic process                      |
| 4620 | GO:0009788 | Signaling and response | Stress | P | negative regulation of abscisic acid-activated signaling pathway               |
| 4621 | GO:0043066 | Signaling and response | Stress | P | negative regulation of apoptotic process                                       |
| 4622 | GO:0010507 | Signaling and response | Stress | P | negative regulation of autophagy                                               |
| 4623 | GO:0060548 | Signaling and response | Stress | P | negative regulation of cell death                                              |
| 4624 | GO:1901181 | Signaling and response | Stress | P | negative regulation of cellular response to caffeine                           |
| 4625 | GO:0031936 | Signaling and response | Stress | P | negative regulation of chromatin silencing                                     |
| 4626 | GO:0031348 | Signaling and response | Stress | P | negative regulation of defense response                                        |
| 4627 | GO:1900425 | Signaling and response | Stress | P | negative regulation of defense response to bacterium                           |
| 4628 | GO:1902478 | Signaling and response | Stress | P | negative regulation of defense response to bacterium, incompatible interaction |
| 4629 | GO:1900366 | Signaling and response | Stress | P | negative regulation of defense response to insect                              |
| 4630 | GO:0010951 | Signaling and response | Stress | P | negative regulation of endopeptidase activity                                  |
| 4631 | GO:0010366 | Signaling and response | Stress | P | negative regulation of ethylene biosynthetic process                           |
| 4632 | GO:0010105 | Signaling and response | Stress | P | negative regulation of ethylene-activated signaling pathway                    |
| 4633 | GO:0010730 | Signaling and response | Stress | P | negative regulation of hydrogen peroxide biosynthetic process                  |
| 4634 | GO:0034051 | Signaling and response | Stress | P | negative regulation of plant-type hypersensitive response                      |
| 4635 | GO:1901001 | Signaling and response | Stress | P | negative regulation of response to salt stress                                 |
| 4636 | GO:0080148 | Signaling and response | Stress | P | negative regulation of response to water deprivation                           |
| 4637 | GO:0010187 | Signaling and response | Stress | P | negative regulation of seed germination                                        |
| 4638 | GO:0010113 | Signaling and response | Stress | P | negative regulation of systemic acquired resistance                            |
| 4639 | GO:0017148 | Signaling and response | Stress | P | negative regulation of translation                                             |
| 4640 | GO:0006809 | Signaling and response | Stress | P | nitric oxide biosynthetic process                                              |
| 4641 | GO:0007263 | Signaling and response | Stress | P | nitric oxide mediated signal transduction                                      |
| 4642 | GO:0050421 | Signaling and response | Stress | F | nitrite reductase (NO-forming) activity                                        |
| 4643 | GO:0010196 | Signaling and response | Stress | P | nonphotochemical quenching                                                     |
| 4644 | GO:0016684 | Signaling and response | Stress | F | oxidoreductase activity, acting on peroxide as acceptor                        |
| 4645 | GO:0009405 | Signaling and response | Stress | P | pathogenesis                                                                   |
| 4646 | GO:0018401 | Signaling and response | Stress | P | peptidyl-proline hydroxylation to 4-hydroxy-L-proline                          |
| 4647 | GO:0051920 | Signaling and response | Stress | F | peroxiredoxin activity                                                         |
| 4648 | GO:0055062 | Signaling and response | Stress | P | phosphate ion homeostasis                                                      |
| 4649 | GO:0031210 | Signaling and response | Stress | F | phosphatidylcholine binding                                                    |
| 4650 | GO:0046854 | Signaling and response | Stress | P | phosphatidylinositol phosphorylation                                           |
| 4651 | GO:0048015 | Signaling and response | Stress | P | phosphatidylinositol-mediated signaling                                        |
| 4652 | GO:0055091 | Signaling and response | Stress | P | phospholipid homeostasis                                                       |
| 4653 | GO:0047066 | Signaling and response | Stress | F | phospholipid-hydroperoxide glutathione peroxidase activity                     |
| 4654 | GO:0010117 | Signaling and response | Stress | P | photoprotection                                                                |
| 4655 | GO:0052315 | Signaling and response | Stress | P | phytoalexin biosynthetic process                                               |
| 4656 | GO:0052314 | Signaling and response | Stress | P | phytoalexin metabolic process                                                  |
| 4657 | GO:0009626 | Signaling and response | Stress | P | plant-type hypersensitive response                                             |
| 4658 | GO:0009789 | Signaling and response | Stress | P | positive regulation of abscisic acid-activated signaling pathway               |
| 4659 | GO:0010186 | Signaling and response | Stress | P | positive regulation of cellular defense response                               |
| 4660 | GO:1900103 | Signaling and response | Stress | P | positive regulation of endoplasmic reticulum unfolded protein response         |
| 4661 | GO:0010365 | Signaling and response | Stress | P | positive regulation of ethylene biosynthetic process                           |
| 4662 | GO:0009963 | Signaling and response | Stress | P | positive regulation of flavonoid biosynthetic process                          |
| 4663 | GO:1900057 | Signaling and response | Stress | P | positive regulation of leaf senescence                                         |
| 4664 | GO:0034052 | Signaling and response | Stress | P | positive regulation of plant-type hypersensitive response                      |
| 4665 | GO:0043068 | Signaling and response | Stress | P | positive regulation of programmed cell death                                   |
| 4666 | GO:2000379 | Signaling and response | Stress | P | positive regulation of reactive oxygen species metabolic process               |
| 4667 | GO:1902584 | Signaling and response | Stress | P | positive regulation of response to water deprivation                           |
| 4668 | GO:1901672 | Signaling and response | Stress | P | positive regulation of systemic acquired resistance                            |
| 4669 | GO:0055075 | Signaling and response | Stress | P | potassium ion homeostasis                                                      |
| 4670 | GO:0080136 | Signaling and response | Stress | P | priming of cellular response to stress                                         |
| 4671 | GO:0004656 | Signaling and response | Stress | F | procollagen-proline 4-dioxygenase activity                                     |
| 4672 | GO:0097468 | Signaling and response | Stress | P | programmed cell death in response to reactive oxygen species                   |
| 4673 | GO:0002020 | Signaling and response | Stress | F | protease binding                                                               |
| 4674 | GO:0044183 | Signaling and response | Stress | F | protein folding chaperone                                                      |
| 4675 | GO:0006515 | Signaling and response | Stress | P | protein quality control for misfolded or incompletely synthesized proteins     |
| 4676 | GO:0042026 | Signaling and response | Stress | P | protein refolding                                                              |
| 4677 | GO:0030091 | Signaling and response | Stress | P | protein repair                                                                 |
| 4678 | GO:0006621 | Signaling and response | Stress | P | protein retention in ER lumen                                                  |
| 4679 | GO:2001057 | Signaling and response | Stress | P | reactive nitrogen species metabolic process                                    |
| 4680 | GO:0072593 | Signaling and response | Stress | P | reactive oxygen species metabolic process                                      |
| 4681 | GO:0006898 | Signaling and response | Stress | P | receptor-mediated endocytosis                                                  |
| 4682 | GO:0010115 | Signaling and response | Stress | P | regulation of abscisic acid biosynthetic process                               |
| 4683 | GO:0009787 | Signaling and response | Stress | P | regulation of abscisic acid-activated signaling pathway                        |
| 4684 | GO:0010359 | Signaling and response | Stress | P | regulation of anion channel activity                                           |
| 4685 | GO:0030641 | Signaling and response | Stress | P | regulation of cellular pH                                                      |
| 4686 | GO:1905957 | Signaling and response | Stress | P | regulation of cellular response to alcohol                                     |
| 4687 | GO:1900067 | Signaling and response | Stress | P | regulation of cellular response to alkaline pH                                 |
| 4688 | GO:0031347 | Signaling and response | Stress | P | regulation of defense response                                                 |
| 4689 | GO:1900424 | Signaling and response | Stress | P | regulation of defense response to bacterium                                    |
| 4690 | GO:1900150 | Signaling and response | Stress | P | regulation of defense response to fungus                                       |
| 4691 | GO:2000068 | Signaling and response | Stress | P | regulation of defense response to insect                                       |
| 4692 | GO:0050691 | Signaling and response | Stress | P | regulation of defense response to virus by host                                |
| 4693 | GO:0010104 | Signaling and response | Stress | P | regulation of ethylene-activated signaling pathway                             |
| 4694 | GO:0045088 | Signaling and response | Stress | P | regulation of innate immune response                                           |
| 4695 | GO:0051453 | Signaling and response | Stress | P | regulation of intracellular pH                                                 |

|      |            |                        |        |   |                                                                               |
|------|------------|------------------------|--------|---|-------------------------------------------------------------------------------|
| 4696 | GO:2000082 | Signaling and response | Stress | P | regulation of L-ascorbic acid biosynthetic process                            |
| 4697 | GO:0006885 | Signaling and response | Stress | P | regulation of pH                                                              |
| 4698 | GO:0010363 | Signaling and response | Stress | P | regulation of plant-type hypersensitive response                              |
| 4699 | GO:1903426 | Signaling and response | Stress | P | regulation of reactive oxygen species biosynthetic process                    |
| 4700 | GO:2000377 | Signaling and response | Stress | P | regulation of reactive oxygen species metabolic process                       |
| 4701 | GO:2000121 | Signaling and response | Stress | P | regulation of removal of superoxide radicals                                  |
| 4702 | GO:1901419 | Signaling and response | Stress | P | regulation of response to alcohol                                             |
| 4703 | GO:2001020 | Signaling and response | Stress | P | regulation of response to DNA damage stimulus                                 |
| 4704 | GO:0047484 | Signaling and response | Stress | P | regulation of response to osmotic stress                                      |
| 4705 | GO:1901031 | Signaling and response | Stress | P | regulation of response to reactive oxygen species                             |
| 4706 | GO:1901000 | Signaling and response | Stress | P | regulation of response to salt stress                                         |
| 4707 | GO:2000070 | Signaling and response | Stress | P | regulation of response to water deprivation                                   |
| 4708 | GO:2000033 | Signaling and response | Stress | P | regulation of seed dormancy process                                           |
| 4709 | GO:0090333 | Signaling and response | Stress | P | regulation of stomatal closure                                                |
| 4710 | GO:0010119 | Signaling and response | Stress | P | regulation of stomatal movement                                               |
| 4711 | GO:1902456 | Signaling and response | Stress | P | regulation of stomatal opening                                                |
| 4712 | GO:0043903 | Signaling and response | Stress | P | regulation of symbiosis, encompassing mutualism through parasitism            |
| 4713 | GO:0010112 | Signaling and response | Stress | P | regulation of systemic acquired resistance                                    |
| 4714 | GO:0051209 | Signaling and response | Stress | P | release of sequestered calcium ion into cytosol                               |
| 4715 | GO:0019430 | Signaling and response | Stress | P | removal of superoxide radicals                                                |
| 4716 | GO:0002679 | Signaling and response | Stress | P | respiratory burst involved in defense response                                |
| 4717 | GO:0009737 | Signaling and response | Stress | P | response to abscisic acid                                                     |
| 4718 | GO:0009646 | Signaling and response | Stress | P | response to absence of light                                                  |
| 4719 | GO:0097305 | Signaling and response | Stress | P | response to alcohol                                                           |
| 4720 | GO:0046685 | Signaling and response | Stress | P | response to arsenic-containing substance                                      |
| 4721 | GO:0090549 | Signaling and response | Stress | P | response to carbon starvation                                                 |
| 4722 | GO:0009409 | Signaling and response | Stress | P | response to cold                                                              |
|      |            |                        |        |   | response to continuous far red light stimulus by the high-irradiance response |
| 4723 | GO:0010201 | Signaling and response | Stress | P | system                                                                        |
| 4724 | GO:0046898 | Signaling and response | Stress | P | response to cycloheximide                                                     |
| 4725 | GO:0010583 | Signaling and response | Stress | P | response to cyclopentenone                                                    |
| 4726 | GO:0036293 | Signaling and response | Stress | P | response to decreased oxygen levels                                           |
| 4727 | GO:0009269 | Signaling and response | Stress | P | response to desiccation                                                       |
| 4728 | GO:0042493 | Signaling and response | Stress | P | response to drug                                                              |
| 4729 | GO:0034976 | Signaling and response | Stress | P | response to endoplasmic reticulum stress                                      |
| 4730 | GO:0045471 | Signaling and response | Stress | P | response to ethanol                                                           |
| 4731 | GO:0009723 | Signaling and response | Stress | P | response to ethylene                                                          |
| 4732 | GO:0009413 | Signaling and response | Stress | P | response to flooding                                                          |
| 4733 | GO:0050826 | Signaling and response | Stress | P | response to freezing                                                          |
| 4734 | GO:0009620 | Signaling and response | Stress | P | response to fungus                                                            |
| 4735 | GO:0010332 | Signaling and response | Stress | P | response to gamma radiation                                                   |
| 4736 | GO:0009408 | Signaling and response | Stress | P | response to heat                                                              |
| 4737 | GO:0009635 | Signaling and response | Stress | P | response to herbicide                                                         |
| 4738 | GO:0080027 | Signaling and response | Stress | P | response to herbivore                                                         |
| 4739 | GO:0009644 | Signaling and response | Stress | P | response to high light intensity                                              |
| 4740 | GO:0042542 | Signaling and response | Stress | P | response to hydrogen peroxide                                                 |
| 4741 | GO:0001666 | Signaling and response | Stress | P | response to hypoxia                                                           |
| 4742 | GO:0009625 | Signaling and response | Stress | P | response to insect                                                            |
| 4743 | GO:1990641 | Signaling and response | Stress | P | response to iron ion starvation                                               |
| 4744 | GO:0033591 | Signaling and response | Stress | P | response to L-ascorbic acid                                                   |
| 4745 | GO:0010288 | Signaling and response | Stress | P | response to lead ion                                                          |
| 4746 | GO:0006982 | Signaling and response | Stress | P | response to lipid hydroperoxide                                               |
| 4747 | GO:0010244 | Signaling and response | Stress | P | response to low fluence blue light stimulus by blue low-fluence system        |
| 4748 | GO:0009645 | Signaling and response | Stress | P | response to low light intensity stimulus                                      |
| 4749 | GO:0009612 | Signaling and response | Stress | P | response to mechanical stimulus                                               |
| 4750 | GO:0010188 | Signaling and response | Stress | P | response to microbial phytotoxin                                              |
| 4751 | GO:0051788 | Signaling and response | Stress | P | response to misfolded protein                                                 |
| 4752 | GO:0002237 | Signaling and response | Stress | P | response to molecule of bacterial origin                                      |
| 4753 | GO:0002238 | Signaling and response | Stress | P | response to molecule of fungal origin                                         |
| 4754 | GO:0009624 | Signaling and response | Stress | P | response to nematode                                                          |
| 4755 | GO:0090548 | Signaling and response | Stress | P | response to nitrate starvation                                                |
| 4756 | GO:0071731 | Signaling and response | Stress | P | response to nitric oxide                                                      |
| 4757 | GO:0010335 | Signaling and response | Stress | P | response to non-ionic osmotic stress                                          |
| 4758 | GO:0002239 | Signaling and response | Stress | P | response to oomycetes                                                         |
| 4759 | GO:0006970 | Signaling and response | Stress | P | response to osmotic stress                                                    |
| 4760 | GO:0051707 | Signaling and response | Stress | P | response to other organism                                                    |
| 4761 | GO:0006979 | Signaling and response | Stress | P | response to oxidative stress                                                  |
| 4762 | GO:0000305 | Signaling and response | Stress | P | response to oxygen radical                                                    |
| 4763 | GO:0010193 | Signaling and response | Stress | P | response to ozone                                                             |
| 4764 | GO:0009623 | Signaling and response | Stress | P | response to parasitic fungus                                                  |
| 4765 | GO:0009268 | Signaling and response | Stress | P | response to pH                                                                |
| 4766 | GO:0080183 | Signaling and response | Stress | P | response to photooxidative stress                                             |
| 4767 | GO:0009314 | Signaling and response | Stress | P | response to radiation                                                         |
| 4768 | GO:0000302 | Signaling and response | Stress | P | response to reactive oxygen species                                           |
| 4769 | GO:0051775 | Signaling and response | Stress | P | response to redox state                                                       |
| 4770 | GO:1902074 | Signaling and response | Stress | P | response to salt                                                              |
| 4771 | GO:0009651 | Signaling and response | Stress | P | response to salt stress                                                       |
| 4772 | GO:0042594 | Signaling and response | Stress | P | response to starvation                                                        |

|      |            |                        |        |   |                                                                         |
|------|------------|------------------------|--------|---|-------------------------------------------------------------------------|
| 4773 | GO:0006950 | Signaling and response | Stress | P | response to stress                                                      |
| 4774 | GO:0000303 | Signaling and response | Stress | P | response to superoxide                                                  |
| 4775 | GO:0009610 | Signaling and response | Stress | P | response to symbiotic fungus                                            |
| 4776 | GO:0009636 | Signaling and response | Stress | P | response to toxic substance                                             |
| 4777 | GO:0010353 | Signaling and response | Stress | P | response to trehalose                                                   |
| 4778 | GO:0006986 | Signaling and response | Stress | P | response to unfolded protein                                            |
| 4779 | GO:0010224 | Signaling and response | Stress | P | response to UV-B                                                        |
| 4780 | GO:0009615 | Signaling and response | Stress | P | response to virus                                                       |
| 4781 | GO:0009414 | Signaling and response | Stress | P | response to water deprivation                                           |
| 4782 | GO:0009611 | Signaling and response | Stress | P | response to wounding                                                    |
| 4783 | GO:0005094 | Signaling and response | Stress | F | Rho GDP-dissociation inhibitor activity                                 |
| 4784 | GO:0005089 | Signaling and response | Stress | F | Rho guanyl-nucleotide exchange factor activity                          |
| 4785 | GO:0006278 | Signaling and response | Stress | P | RNA-dependent DNA biosynthetic process                                  |
| 4786 | GO:1990112 | Signaling and response | Stress | C | RQC complex                                                             |
| 4787 | GO:0009303 | Signaling and response | Stress | P | rRNA transcription                                                      |
| 4788 | GO:0051903 | Signaling and response | Stress | F | S-(hydroxymethyl)glutathione dehydrogenase activity                     |
| 4789 | GO:0004867 | Signaling and response | Stress | F | serine-type endopeptidase inhibitor activity                            |
| 4790 | GO:0090734 | Signaling and response | Stress | C | site of DNA damage                                                      |
| 4791 | GO:0016444 | Signaling and response | Stress | P | somatic cell DNA recombination                                          |
| 4792 | GO:0090332 | Signaling and response | Stress | P | stomatal closure                                                        |
| 4793 | GO:0034063 | Signaling and response | Stress | P | stress granule assembly                                                 |
| 4794 | GO:0004784 | Signaling and response | Stress | F | superoxide dismutase activity                                           |
| 4795 | GO:0006801 | Signaling and response | Stress | P | superoxide metabolic process                                            |
| 4796 | GO:0009627 | Signaling and response | Stress | P | systemic acquired resistance                                            |
| 4797 | GO:0009862 | Signaling and response | Stress | P | systemic acquired resistance, salicylic acid mediated signaling pathway |
| 4798 | GO:0043247 | Signaling and response | Stress | P | telomere maintenance in response to DNA damage                          |
| 4799 | GO:0004843 | Signaling and response | Stress | F | thiol-dependent ubiquitin-specific protease activity                    |
| 4800 | GO:0008379 | Signaling and response | Stress | F | thioredoxin peroxidase activity                                         |
| 4801 | GO:0042964 | Signaling and response | Stress | P | thioredoxin reduction                                                   |
| 4802 | GO:0090729 | Signaling and response | Stress | F | toxin activity                                                          |
| 4803 | GO:0009403 | Signaling and response | Stress | P | toxin biosynthetic process                                              |
| 4804 | GO:0009407 | Signaling and response | Stress | P | toxin catabolic process                                                 |
| 4805 | GO:0009404 | Signaling and response | Stress | P | toxin metabolic process                                                 |
| 4806 | GO:0055076 | Signaling and response | Stress | P | transition metal ion homeostasis                                        |
| 4807 | GO:0004675 | Signaling and response | Stress | F | transmembrane receptor protein serine/threonine kinase activity         |
| 4808 | GO:0070413 | Signaling and response | Stress | P | trehalose metabolism in response to stress                              |
| 4809 | GO:0070328 | Signaling and response | Stress | P | triglyceride homeostasis                                                |
| 4810 | GO:0072506 | Signaling and response | Stress | P | trivalent inorganic anion homeostasis                                   |
| 4811 | GO:0030433 | Signaling and response | Stress | P | ubiquitin-dependent ERAD pathway                                        |
| 4812 | GO:0051082 | Signaling and response | Stress | F | unfolded protein binding                                                |
| 4813 | GO:0009650 | Signaling and response | Stress | P | UV protection                                                           |
| 4814 | GO:0070914 | Signaling and response | Stress | P | UV-damage excision repair                                               |
| 4815 | GO:0016032 | Signaling and response | Stress | P | viral process                                                           |
| 4816 | GO:0039694 | Signaling and response | Stress | P | viral RNA genome replication                                            |
| 4817 | GO:0009110 | Signaling and response | Stress | P | vitamin biosynthetic process                                            |
| 4818 | GO:0010189 | Signaling and response | Stress | P | vitamin E biosynthetic process                                          |
| 4819 | GO:0006766 | Signaling and response | Stress | P | vitamin metabolic process                                               |
| 4820 | GO:0030104 | Signaling and response | Stress | P | water homeostasis                                                       |
| 4821 | GO:0042364 | Signaling and response | Stress | P | water-soluble vitamin biosynthetic process                              |
| 4822 | GO:0006767 | Signaling and response | Stress | P | water-soluble vitamin metabolic process                                 |
