# Supplementary material for: Whether Gametophytes Are Reduced or Unreduced in Angiosperms Might Be Determined Metabolically
Source: MDPI journal article supplement (doi:10.3390/genes11121449), 2020-12-02
Supplement: s1 [file s1]

**Table S4.** Primers used for qRT-PCR verification of microarray data.

| Gene      | Name   | Dir. | Primer                | Tm   |
|-----------|--------|------|-----------------------|------|
| AT1G32640 | MYC2   | F    | CGACGACAACGCTTCTATGA  | 60.4 |
|           |        | R    | CCAACCTTCGTGTGTTTCCTT | 62.4 |
| AT5G20240 | PI     | F    | CTTCCATGGATCTTGGTGCT  | 60.4 |
|           |        | R    | ATCTCCATCTGGTGGTCTCG  | 60.4 |
| AT1G69120 | AP1    | F    | GCAAGCAATGAGCCCTAAAG  | 60.4 |
|           |        | R    | ACTGCTCCTGTTGAGCCCTA  | 62.4 |
| AT5G53250 | AGP22  | F    | CCTGAAATTTCCGTTGGAGA  | 58.4 |
|           |        | R    | GCCAAAGCCACCATCATTAG  | 60.4 |
| AT4G09960 | STK    | F    | TGCCGCGTACTATCAACAAG  | 60.4 |
|           |        | R    | TGCTTCTTGGACCTGATCCT  | 60.4 |
| AT1G20930 | CDKB2  | F    | ATCTTTGCGGGAGACTCTGA  | 60.4 |
|           |        | R    | GTTTTGCTGGCTCGTACTCC  | 62.4 |
| AT5G51230 | EMF2   | F    | CGTTTCTCCTAAGCCTGTCG  | 62.4 |
|           |        | R    | GATCCTGATTTTGCCTCCAA  | 58.4 |
| AT3G52940 | FK     | F    | TGTTACTGGGCGAAGTTCCT  | 60.4 |
|           |        | R    | GGAACCATCCTGCACACTTT  | 60.4 |
| AT3G13160 | PPR    | F    | GTTCAAGAAAGCCTGCCAAG  | 60.4 |
|           |        | R    | GGCATTTTCGTCGAACACTTT | 58.4 |
| AT5G61380 | TOC1   | F    | GATCTCCCAATGGCTAAGG   | 60.4 |
|           |        | R    | CATGCGTCTTCTTCTCCACA  | 60.4 |
| AT4G30270 | MER15B | F    | CAACGGCCAGCTTCTTACTC  | 62.4 |
|           |        | R    | TCATCCCAAGTGGATCCTTC  | 60.4 |
| AT4G25100 | FSD1   | F    | TGGAGGAAAACCATCAGGAG  | 60.4 |
|           |        | R    | GGATTCACAGCATTGGGAGT  | 60.4 |
| AT3G13580 | RPL7D  | F    | TCATCTGCGTTGAGGATCTG  | 60.4 |
|           |        | R    | GATGAAGTTCTCGCGGTTTC  | 60.4 |
| AT2G35940 | BLH1   | F    | AACATGGGATCCATGGAAAA  | 56.3 |
|           |        | R    | ATTGTCTCGTCGCTGGTTCT  | 60.4 |
