# Supplementary material for: Whether Gametophytes Are Reduced or Unreduced in Angiosperms Might Be Determined Metabolically
Source: Genes (Basel). 2020 Dec 2;11(12):1449. doi: 10.3390/genes11121449 (PMC7761559; doi:10.3390/genes11121449)
Supplement: Supplementary file 1 [file genes-11-01449-s001.zip]

Archive with 12 entries (12 files):
- Fig S1.tif
- Fig S2.tif
- Fig S3.tif
- Table S1 GO assignment rules.pdf
- Table S2 GO master list.pdf
- Table S3 Adjusted residuals.pdf
- Table S4 qPCR primers.pdf
- Table S5 DEGs.pdf
- Table S6 All GOs of DEGs.pdf
- Table S7 OGOs.pdf
- Table S8 EGOs.pdf
- Table S9 key DEG literature.pdf
